# Supplementary material for: Loss of RNA–Dependent RNA Polymerase 2 (RDR2) Function Causes Widespread and Unexpected Changes in the Expression of Transposons, Genes, and 24-nt Small RNAs
Source: PubMed Central journal article supplement (PMC2774947; doi:10.1371/journal.pgen.1000737), 2009-11-20
Supplement: pgen.1000737.s007.pdf [file pgen.1000737.s007.pdf]

**Table S2.** List of differentially expressed DNA transposons

| DNA transposon ID      | No. Illumina/Solexa Reads <sup>a</sup> |            | log <sub>2</sub> (FC) <sup>b</sup> | BH.FDR <sup>c</sup> |
|------------------------|----------------------------------------|------------|------------------------------------|---------------------|
|                        | Mutant                                 | Non-mutant |                                    |                     |
| ZM_CACTA_105           | 14,280                                 | 35,351     | -0.6                               | 0.00E+01            |
| ZM_CACTA_85            | 10,276                                 | 7,755      | 1.1                                | 0.00E+01            |
| ZM_CACTA_89            | 13,242                                 | 29,148     | -0.4                               | 2.19E-190           |
| ZM_CACTA_93            | 1,856                                  | 6,206      | -1.0                               | 4.86E-179           |
| ZM_CACTA_18            | 2,264                                  | 6,205      | -0.7                               | 1.14E-103           |
| ZM_CACTA_16            | 2,585                                  | 6,806      | -0.7                               | 5.62E-99            |
| ZM_CACTA_102           | 4,857                                  | 5,614      | 0.5                                | 3.95E-69            |
| ZM_CACTA_21            | 3,436                                  | 3,931      | 0.5                                | 2.54E-51            |
| ZM_PIF/Harbinger_17    | 1,279                                  | 1,137      | 0.9                                | 6.60E-49            |
| ZM_Stowaway_70         | 242                                    | 62         | 2.7                                | 7.53E-48            |
| ZM_CACTA_32            | 1,365                                  | 1,366      | 0.7                                | 7.12E-36            |
| ZM_CACTA_2             | 8,113                                  | 15,692     | -0.2                               | 7.38E-34            |
| DTM_Zm00665_AC184764-1 | 2,334                                  | 2,771      | 0.5                                | 1.58E-28            |
| ZM_CACTA_73            | 775                                    | 1,993      | -0.7                               | 2.65E-26            |
| ZM_CACTA_1             | 1,459                                  | 3,341      | -0.5                               | 5.20E-26            |
| ZM_Stowaway_5          | 694                                    | 635        | 0.8                                | 1.77E-24            |
| ZM_PIF/Harbinger_16    | 821                                    | 800        | 0.7                                | 9.24E-24            |
| ZM_CACTA_63            | 1,291                                  | 1,465      | 0.5                                | 4.44E-20            |
| DTM_TAFT1_DQ493649     | 983                                    | 1,060      | 0.6                                | 2.17E-19            |
| DTM_Zm00473_AC191070-1 | 1,190                                  | 1,401      | 0.5                                | 2.81E-15            |
| ZM_CACTA_77            | 1,690                                  | 3,529      | -0.3                               | 2.81E-15            |
| DTM_Zm00257_consensus  | 286                                    | 233        | 1.0                                | 8.52E-14            |
| DTM_Zm00268_AC191380-1 | 715                                    | 788        | 0.6                                | 7.22E-13            |
| ZM_CACTA_26            | 1,186                                  | 2,522      | -0.4                               | 1.59E-12            |
| DTM_Zm09546_AC191082-1 | 502                                    | 513        | 0.7                                | 2.20E-12            |
| DTM_Zm00850_AC186314-1 | 298                                    | 262        | 0.9                                | 6.33E-12            |
| DTM_Zm32512_AC187775-1 | 459                                    | 474        | 0.7                                | 6.19E-11            |
| ZM_hAT_2               | 611                                    | 682        | 0.6                                | 1.97E-10            |
| DTM_Zm09664_AC195786-1 | 480                                    | 509        | 0.6                                | 3.00E-10            |
| ZM_CACTA_noncoding_39  | 602                                    | 677        | 0.5                                | 5.84E-10            |
| ZM_CACTA_20            | 3,902                                  | 5,564      | 0.2                                | 6.02E-10            |
| ZM_Tourist_34          | 816                                    | 978        | 0.5                                | 1.39E-09            |
| ZM_CACTA_22            | 1,252                                  | 1,603      | 0.4                                | 1.76E-09            |
| ZM_CACTA_4             | 1,947                                  | 3,808      | -0.3                               | 2.75E-09            |
| ZM_hAT_36              | 525                                    | 1,196      | -0.5                               | 3.16E-09            |
| ZM_hAT_noncoding_31    | 245                                    | 225        | 0.8                                | 9.82E-09            |
| DTM_Zm00673_AC187563-1 | 354                                    | 364        | 0.7                                | 1.24E-08            |
| ZM_hAT_noncoding_15    | 93                                     | 54         | 1.5                                | 1.29E-08            |
| ZM_CACTA_79            | 986                                    | 1,244      | 0.4                                | 2.19E-08            |
| ZM_CACTA_31            | 1,498                                  | 2,967      | -0.3                               | 2.59E-08            |
| ZM_hAT_noncoding_45    | 553                                    | 640        | 0.5                                | 4.66E-08            |
| DTM_Zm33205_AC203276-1 | 92                                     | 57         | 1.4                                | 8.46E-08            |
| ZM_CACTA_90            | 1,431                                  | 1,926      | 0.3                                | 3.26E-07            |
| DTM_Zm02117_AC177838-1 | 1,781                                  | 2,449      | 0.3                                | 3.30E-07            |

|                        |       |       |      |          |
|------------------------|-------|-------|------|----------|
| ZM_CACTA_35            | 781   | 1,628 | -0.3 | 3.49E-07 |
| DTM_Zm00364_AC196271-1 | 444   | 505   | 0.5  | 4.05E-07 |
| ZM_Tourist_2           | 96    | 65    | 1.3  | 4.97E-07 |
| ZM_CACTA_107           | 1,500 | 2,919 | -0.2 | 7.19E-07 |
| ZM_Tourist_35          | 72    | 42    | 1.5  | 8.88E-07 |
| ZM_PIF/Harbinger_19    | 1,222 | 1,649 | 0.3  | 4.71E-06 |
| ZM_PIF/Harbinger_25    | 904   | 1,181 | 0.3  | 5.14E-06 |
| ZM_hAT_4               | 461   | 546   | 0.5  | 5.23E-06 |
| ZM_PIF/Harbinger_24    | 220   | 221   | 0.7  | 5.23E-06 |
| ZM_CACTA_19            | 582   | 1,224 | -0.4 | 7.51E-06 |
| ZM_Stowaway_13         | 55    | 30    | 1.6  | 1.11E-05 |
| ZM_Tourist_18          | 190   | 187   | 0.7  | 1.20E-05 |
| ZM_CACTA_45            | 707   | 910   | 0.3  | 2.29E-05 |
| ZM_hAT_noncoding_30    | 102   | 83    | 1.0  | 2.71E-05 |
| ZM_PIF/Harbinger_32    | 208   | 214   | 0.7  | 2.71E-05 |
| ZM_CACTA_55            | 672   | 863   | 0.4  | 3.31E-05 |
| DTM_Zm17860_AC184871-1 | 137   | 125   | 0.8  | 3.44E-05 |
| ZM_CACTA_28            | 859   | 1,145 | 0.3  | 6.52E-05 |
| ZM_CACTA_53            | 1,001 | 1,357 | 0.3  | 6.88E-05 |
| ZM_Stowaway_64         | 71    | 51    | 1.2  | 6.91E-05 |
| ZM_PIF/Harbinger_35    | 348   | 411   | 0.5  | 9.22E-05 |
| ZM_CACTA_56            | 1,538 | 2,174 | 0.2  | 1.14E-04 |
| ZM_hAT_8               | 657   | 1,323 | -0.3 | 1.41E-04 |
| DTM_Zm09941_consensus  | 97    | 82    | 1.0  | 1.46E-04 |
| ZM_Tourist_61          | 146   | 143   | 0.7  | 1.61E-04 |
| ZM_PIF/Harbinger_37    | 849   | 1,144 | 0.3  | 1.78E-04 |
| DTM_Zm20615_AC216184-1 | 96    | 82    | 0.9  | 1.89E-04 |
| ZM_hAT_18              | 29    | 110   | -1.2 | 2.30E-04 |
| ZM_CACTA_109           | 1,280 | 1,796 | 0.2  | 2.36E-04 |
| ZM_Stowaway_6          | 107   | 96    | 0.9  | 2.36E-04 |
| ZM_CACTA_noncoding_25  | 289   | 339   | 0.5  | 3.68E-04 |
| ZM_hAT_noncoding_183   | 118   | 112   | 0.8  | 4.00E-04 |
| ZM_CACTA_110           | 589   | 1,183 | -0.3 | 4.47E-04 |
| ZM_PIF/Harbinger_18    | 348   | 739   | -0.4 | 5.09E-04 |
| ZM_hAT_noncoding_42    | 139   | 140   | 0.7  | 5.26E-04 |
| ZM_Tourist_49          | 25    | 10    | 2.0  | 6.77E-04 |
| ZM_CACTA_62            | 896   | 1,234 | 0.3  | 7.48E-04 |
| ZM_CACTA_91            | 626   | 833   | 0.3  | 8.03E-04 |
| ZM_PIF/Harbinger_34    | 287   | 620   | -0.4 | 8.27E-04 |
| ZM_hAT_33              | 109   | 274   | -0.6 | 1.02E-03 |
| ZM_Tourist_50          | 112   | 110   | 0.7  | 1.51E-03 |
| ZM_CACTA_noncoding_7   | 200   | 227   | 0.5  | 1.52E-03 |
| DTM_Zm01468_AC186160-1 | 98    | 93    | 0.8  | 1.52E-03 |
| ZM_Stowaway_21         | 164   | 179   | 0.6  | 1.56E-03 |
| ZM_PIF/Harbinger_12    | 96    | 91    | 0.8  | 1.71E-03 |
| ZM_CACTA_noncoding_1   | 153   | 165   | 0.6  | 1.72E-03 |
| ZM_hAT_34              | 251   | 299   | 0.5  | 1.74E-03 |

|                        |       |       |         |          |
|------------------------|-------|-------|---------|----------|
| ZM_Tourist_66          | 204   | 234   | 0.5     | 1.74E-03 |
| DTM_Zm04817_AC194407-1 | 819   | 1,131 | 0.2     | 1.75E-03 |
| ZM_CACTA_75            | 585   | 783   | 0.3     | 1.81E-03 |
| DTM_Zm10271_AC186904-1 | 50    | 37    | 1.1     | 1.82E-03 |
| ZM_CACTA_101           | 790   | 1,089 | 0.2     | 1.88E-03 |
| ZM_CACTA_83            | 587   | 790   | 0.3     | 2.53E-03 |
| ZM_CACTA_33            | 548   | 732   | 0.3     | 2.61E-03 |
| ZM_CACTA_72            | 978   | 1,379 | 0.2     | 2.61E-03 |
| ZM_hAT_noncoding_174   | 40    | 27    | 1.3     | 2.61E-03 |
| ZM_PIF/Harbinger_33    | 360   | 740   | -0.3    | 2.84E-03 |
| DTM_Zm02703_AC177838-1 | 217   | 256   | 0.5     | 3.19E-03 |
| ZM_CACTA_59            | 558   | 752   | 0.3     | 3.61E-03 |
| ZM_CACTA_67            | 1,658 | 3,016 | -0.2    | 4.21E-03 |
| ZM_CACTA_71            | 1,118 | 1,602 | 0.2     | 4.30E-03 |
| ZM_CACTA_103           | 1,035 | 1,475 | 0.2     | 4.33E-03 |
| ZM_Stowaway_8          | 67    | 60    | 0.9     | 4.73E-03 |
| DTM_Zm33207_AC210869-1 | 68    | 61    | 0.9     | 4.98E-03 |
| ZM_CACTA_9             | 2,002 | 2,976 | 0.1     | 5.32E-03 |
| ZM_hAT_38              | 203   | 242   | 0.5     | 5.92E-03 |
| ZM_hAT_39              | 249   | 307   | 0.4     | 6.81E-03 |
| ZM_hAT_11              | 287   | 593   | -0.3    | 8.01E-03 |
| DTM_Zm00884_AC214130-1 | 106   | 111   | 0.6     | 8.07E-03 |
| ZM_CACTA_41            | 670   | 931   | 0.2     | 8.17E-03 |
| ZM_CACTA_14            | 1,692 | 3,053 | -0.1    | 8.87E-03 |
| ZM_hAT_noncoding_4     | 77    | 75    | 0.8     | 9.17E-03 |
| ZM_Stowaway_12         | 187   | 223   | 0.5     | 9.89E-03 |
| ZM_CACTA_61            | 2,810 | 4,265 | 0.1     | 1.00E-02 |
| ZM_PIF/Harbinger_36    | 366   | 481   | 0.3     | 1.00E-02 |
| DTM_Zm06136_AC196794-1 | 307   | 398   | 0.3     | 1.32E-02 |
| ZM_hAT_19              | 98    | 104   | 0.6     | 1.38E-02 |
| ZM_hAT_noncoding_22    | 83    | 85    | 0.7     | 1.49E-02 |
| ZM_CACTA_99            | 2,106 | 3,170 | 0.1     | 1.52E-02 |
| ZM_CACTA_88            | 419   | 823   | -0.3    | 1.52E-02 |
| ZM_hAT_noncoding_7     | 154   | 181   | 0.5     | 1.65E-02 |
| ZM_Stowaway_82         | 125   | 141   | 0.5     | 1.70E-02 |
| ZM_hAT_noncoding_2     | 172   | 206   | 0.5     | 1.71E-02 |
| ZM_Tourist_27          | 6     | 0     | #VALUE! | 1.71E-02 |
| DTM_Zm00851_AC186342-1 | 170   | 205   | 0.4     | 1.94E-02 |
| DTM_Zm00743_AC177943-1 | 1,266 | 1,866 | 0.2     | 2.11E-02 |
| ZM_hAT_15              | 64    | 160   | -0.6    | 2.11E-02 |
| ZM_hAT_noncoding_58    | 125   | 143   | 0.5     | 2.11E-02 |
| DTM_Zm20301_AC191081-1 | 63    | 61    | 0.8     | 2.19E-02 |
| DTM_Zm02661_AC177816-1 | 697   | 991   | 0.2     | 2.31E-02 |
| ZM_Stowaway_30         | 236   | 301   | 0.4     | 2.39E-02 |
| ZM_CACTA_94            | 794   | 1,140 | 0.2     | 2.45E-02 |
| ZM_CACTA_44            | 743   | 1,063 | 0.2     | 2.61E-02 |
| DTM_Zm11868_AC202888-1 | 419   | 573   | 0.3     | 2.85E-02 |

|                          |        |        |         |          |
|--------------------------|--------|--------|---------|----------|
| ZM_hAT_noncoding_37      | 16     | 8      | 1.7     | 2.85E-02 |
| ZM_hAT_noncoding_86      | 49     | 45     | 0.8     | 2.91E-02 |
| ZM_CACTA_74              | 13,198 | 22,273 | -0.0    | 2.93E-02 |
| ZM_Stowaway_89           | 27     | 19     | 1.2     | 2.93E-02 |
| ZM_Stowaway_55           | 20     | 12     | 1.4     | 2.93E-02 |
| DTM_Zm220511C_AC201818-1 | 173    | 366    | -0.4    | 2.98E-02 |
| ZM_CACTA_noncoding_2     | 182    | 226    | 0.4     | 2.98E-02 |
| ZM_hAT_noncoding_98      | 35     | 29     | 1.0     | 3.38E-02 |
| ZM_Stowaway_95           | 27     | 20     | 1.1     | 3.39E-02 |
| ZM_CACTA_87              | 289    | 575    | -0.3    | 3.44E-02 |
| DTM_Zm33202_AC177945-1   | 28     | 21     | 1.1     | 3.69E-02 |
| ZM_hAT_35                | 179    | 374    | -0.4    | 3.69E-02 |
| ZM_hAT_noncoding_117     | 5      | 0      | #VALUE! | 3.83E-02 |
| ZM_Tourist_40            | 84     | 92     | 0.6     | 3.97E-02 |
| DTM_Zm33222_AC190995-1   | 95     | 215    | -0.5    | 4.04E-02 |
| ZM_CACTA_noncoding_18    | 8      | 2      | 2.7     | 4.06E-02 |
| ZM_Tourist_13            | 31     | 25     | 1.0     | 4.11E-02 |
| DTM_Zm03788_AC184173-1   | 41     | 108    | -0.7    | 4.15E-02 |
| ZM_Stowaway_47           | 62     | 63     | 0.7     | 4.49E-02 |
| ZM_hAT_noncoding_70      | 23     | 69     | -0.9    | 4.63E-02 |
| ZM_hAT_noncoding_8       | 59     | 60     | 0.7     | 4.88E-02 |

<sup>a</sup> The number of reads mapped to each gene model from mutant and non-mutant RNA-seq

<sup>b</sup>  $\log_2$  transformation of foldchange as the relative abundance of transcripts in mutants/non-mutants

<sup>c</sup> The false discovery rate calculated using Benjamini and Hochberg's procedure for the p value from Fisher's exact test
