# Supplementary material for: Loss of RNA–Dependent RNA Polymerase 2 (RDR2) Function Causes Widespread and Unexpected Changes in the Expression of Transposons, Genes, and 24-nt Small RNAs
Source: PubMed Central journal article supplement (PMC2774947; doi:10.1371/journal.pgen.1000737), 2009-11-20
Supplement: pgen.1000737.s008.pdf [file pgen.1000737.s008.pdf]

**Table S3.** List of differentially expressed retrotransposons

| Retrotransposon ID             | No. Illumina/Solexa reads <sup>a</sup> |            | log <sub>2</sub> (FC) <sup>b</sup> | BH.FDR <sup>c</sup> |
|--------------------------------|----------------------------------------|------------|------------------------------------|---------------------|
|                                | Mutant                                 | Non-Mutant |                                    |                     |
| RLC_opie_AC198924_6206         | 12,344                                 | 29,617     | -0.8                               | 0.00E+01            |
| RLG_flip_AC213672_12280        | 16,317                                 | 14,378     | 0.7                                | 0.00E+01            |
| RLX_ipiki_AC212468_11834       | 15,260                                 | 11,162     | 0.9                                | 0.00E+01            |
| RLX_iwik_AC203371_7824         | 19,200                                 | 18,967     | 0.5                                | 1.02E-242           |
| RLC_iteki_AC214131_12504       | 25,079                                 | 27,446     | 0.3                                | 1.17E-163           |
| RLG_ansuya_AC207803_9728       | 13,053                                 | 13,682     | 0.4                                | 1.90E-115           |
| RLG_flip_AC203163_7675         | 15,353                                 | 16,674     | 0.4                                | 1.13E-105           |
| RLG_prem1_AC196065_4927        | 18,592                                 | 31,379     | -0.3                               | 9.63E-100           |
| RLG_prem1_AC200105_6751        | 22,071                                 | 36,643     | -0.3                               | 7.28E-99            |
| RLG_xilon-diguus_AC185317_1058 | 8,677                                  | 15,934     | -0.4                               | 1.08E-98            |
| RLG_xilon-diguus_AC195486_4629 | 5,650                                  | 10,894     | -0.5                               | 1.57E-90            |
| RLG_nihep_AC194441_4115        | 13,881                                 | 15,234     | 0.3                                | 3.48E-88            |
| RLG_ansuya_AC208678_9984       | 9,479                                  | 9,919      | 0.4                                | 7.30E-85            |
| RLX_sari_AC184117_11           | 10,400                                 | 11,319     | 0.4                                | 1.90E-70            |
| RLX_odoj_AC194387_4072         | 8,566                                  | 15,084     | -0.3                               | 3.66E-69            |
| RLX_egisu_AC206234_9137        | 15,262                                 | 25,262     | -0.3                               | 7.72E-66            |
| RLC_ji_AC192600_3526           | 7,933                                  | 8,490      | 0.4                                | 5.95E-61            |
| RIX_ekeje_AC197537-0           | 932                                    | 2,312      | -0.8                               | 1.59E-52            |
| RLX_tekay_AC200856_6996        | 5,032                                  | 9,106      | -0.4                               | 3.73E-51            |
| RLG_cinful-zeon_AC198933_6214  | 5,007                                  | 9,065      | -0.4                               | 3.98E-51            |
| RLX_tuteh_AC183372_584         | 995                                    | 650        | 1.1                                | 1.45E-50            |
| RLG_flip_AC211750_11412        | 12,637                                 | 14,670     | 0.3                                | 4.56E-48            |
| RLG_prem1_AC212325_11702       | 22,480                                 | 35,258     | -0.2                               | 6.74E-46            |
| RLG_huck_AC190900_2713         | 6,371                                  | 6,882      | 0.4                                | 7.68E-46            |
| RLX_gunu_AC200292_6838         | 5,000                                  | 5,231      | 0.4                                | 4.81E-45            |
| RLX_hutu_AC210780_10851        | 3,822                                  | 3,852      | 0.5                                | 2.59E-43            |
| RLG_flip_AC194904_4319         | 10,111                                 | 11,684     | 0.3                                | 1.97E-40            |
| RLG_huck_AC194973_4393         | 1,416                                  | 1,167      | 0.8                                | 1.39E-38            |
| RLC_ji_AC200613_6936           | 8,746                                  | 10,054     | 0.3                                | 6.04E-37            |
| RLX_gunu_AC204937_8509         | 8,659                                  | 14,315     | -0.3                               | 6.18E-37            |
| RLG_huck_AC186656_1609         | 926                                    | 673        | 0.9                                | 1.00E-36            |
| RIX_nugimu_AC203843-0          | 620                                    | 1,546      | -0.8                               | 5.31E-36            |
| RLG_flip_AC214266_12595        | 13,577                                 | 16,289     | 0.2                                | 3.03E-35            |
| RLG_prem1_AC184142_802         | 12,769                                 | 20,390     | -0.2                               | 1.37E-34            |
| RLC_vuijon_AC194895_4312       | 7,687                                  | 8,787      | 0.3                                | 2.01E-34            |
| RLC_ji_AC182107_448            | 7,543                                  | 8,634      | 0.3                                | 2.54E-33            |
| RLG_cinful-zeon_AC203004_7602  | 14,357                                 | 22,672     | -0.2                               | 7.56E-33            |
| RLG_prem1_AC200740_6986        | 10,332                                 | 16,655     | -0.2                               | 4.65E-32            |
| RLC_ji_AC197052_5349           | 7,271                                  | 8,330      | 0.3                                | 6.63E-32            |
| RLC_ji_AC210731_10832          | 7,582                                  | 8,725      | 0.3                                | 7.70E-32            |
| RLC_giepum_AC197531_5634       | 2,734                                  | 5,013      | -0.4                               | 3.76E-31            |
| RLG_guhis_AC198413_5999        | 1,805                                  | 3,510      | -0.5                               | 4.94E-31            |
| RLX_hiimam_AC207734_9687       | 650                                    | 1,533      | -0.8                               | 3.27E-30            |
| RLG_huck_AC199418_6452         | 797                                    | 593        | 0.9                                | 6.16E-30            |

|                                |        |        |      |          |
|--------------------------------|--------|--------|------|----------|
| RLG_flip_AC208040_9765         | 12,426 | 15,002 | 0.2  | 7.95E-30 |
| RLC_ji_AC215728_13156          | 10,095 | 12,003 | 0.2  | 1.56E-29 |
| RLG_huck_AC216048_13250        | 1,426  | 1,271  | 0.6  | 1.94E-29 |
| RLG_huck_AC191259_3001         | 995    | 803    | 0.8  | 2.22E-29 |
| RIX_afeda_AC208414-0           | 1,193  | 2,464  | -0.6 | 2.26E-29 |
| RLC_ji_AC186528_1508           | 1,230  | 2,514  | -0.6 | 1.28E-28 |
| RLG_huck_AC210079_10574        | 1,239  | 1,081  | 0.7  | 7.19E-28 |
| RLG_huck_AC186603_1556         | 1,403  | 1,266  | 0.6  | 1.27E-27 |
| RLX_ilyl_AC196209_163          | 457    | 281    | 1.2  | 9.03E-27 |
| RLG_cinful-zeon_AC211573_11290 | 5,858  | 9,710  | -0.3 | 4.33E-26 |
| RLG_huck_AC195575_4652         | 461    | 296    | 1.1  | 7.97E-25 |
| RLX_defub_AC191393_106         | 1,867  | 1,844  | 0.5  | 3.97E-24 |
| RLG_huck_AC213612_12218        | 766    | 607    | 0.8  | 4.22E-24 |
| RLG_neha_AC215285_13046        | 1,804  | 3,375  | -0.4 | 4.38E-24 |
| RLG_prem1_AC201801_7095        | 11,957 | 18,713 | -0.2 | 7.72E-24 |
| RLX_crm_AC206920_9397          | 1,867  | 3,464  | -0.4 | 1.73E-23 |
| RLX_ebeg_AC213788_12351        | 857    | 1,797  | -0.6 | 4.08E-23 |
| RLG_ajajog_AC191578_3186       | 5,539  | 6,391  | 0.3  | 6.25E-23 |
| RLG_huck_AC212331_11708        | 1,212  | 1,106  | 0.6  | 6.37E-23 |
| RLC_opie_AC202033_7274         | 3,336  | 3,643  | 0.3  | 1.33E-22 |
| RLG_dagaf_AC182835_556         | 6,110  | 7,137  | 0.2  | 3.27E-22 |
| RIX_leijoh_AC212369-0          | 646    | 1,420  | -0.7 | 3.88E-22 |
| RLX_ubow_AC194933_4355         | 1,259  | 2,446  | -0.5 | 7.30E-22 |
| RLX_votaed_AC215881_13209      | 670    | 1,457  | -0.6 | 8.23E-22 |
| RLC_ji_AC190978_2799           | 7,288  | 8,665  | 0.2  | 1.30E-21 |
| RLG_huck_AC193313_3542         | 388    | 257    | 1.1  | 9.76E-20 |
| RLG_cinful-zeon_AC191523_3148  | 1,323  | 2,509  | -0.4 | 1.32E-19 |
| RIX_koajav_AC205853-0          | 351    | 857    | -0.8 | 3.53E-19 |
| RIX_ejoet_AC212216-0           | 298    | 758    | -0.9 | 3.95E-19 |
| RLC_eninu_AC191055_2893        | 598    | 479    | 0.8  | 1.68E-18 |
| RLC_ji_AC193479_3665           | 10,661 | 13,171 | 0.2  | 1.94E-18 |
| RLC_udav_AC196188_5022         | 670    | 1,404  | -0.6 | 3.30E-18 |
| RLC_ji_AC213834_12382          | 16,754 | 21,245 | 0.1  | 7.56E-18 |
| RLC_guvi_AC185473_1128         | 1,210  | 2,280  | -0.4 | 2.96E-17 |
| RLC_opie_AC217577_13524        | 3,658  | 4,177  | 0.3  | 4.78E-17 |
| RLX_eweko_AC200180_6781        | 489    | 378    | 0.8  | 6.24E-17 |
| RIX_edaej_AC215611-0           | 461    | 1,019  | -0.7 | 1.89E-16 |
| RLG_cinful-zeon_AC202991_7588  | 3,002  | 5,052  | -0.3 | 3.39E-16 |
| RLG_cinful-zeon_AC212696_11896 | 15,229 | 23,065 | -0.1 | 4.10E-16 |
| RLG_wuge_AC190810_2615         | 607    | 512    | 0.7  | 6.62E-16 |
| RLG_cinful-zeon_AC215255_13029 | 3,134  | 5,239  | -0.3 | 9.66E-16 |
| RLG_dagaf_AC195302_4533        | 6,828  | 10,734 | -0.2 | 5.54E-15 |
| RLX_wihov_AC205351_8739        | 3,401  | 5,608  | -0.2 | 1.30E-14 |
| RLG_cinful-zeon_AC194954_4372  | 4,537  | 7,305  | -0.2 | 2.44E-14 |
| RLC_opie_AC197201_5474         | 5,068  | 6,081  | 0.2  | 1.11E-13 |
| RLG_cinful-zeon_AC205031_8560  | 3,475  | 5,686  | -0.2 | 1.15E-13 |
| RLC_tufe_AC211502_11228        | 5,232  | 6,294  | 0.2  | 1.20E-13 |

|                                |        |        |      |          |
|--------------------------------|--------|--------|------|----------|
| RLC_opie_AC187149_1780         | 5,747  | 6,965  | 0.2  | 1.51E-13 |
| RLC_opie_AC210610_10772        | 1,702  | 2,970  | -0.3 | 2.33E-13 |
| RLG_cinful-zeon_AC210140_10614 | 9,294  | 14,263 | -0.1 | 3.05E-13 |
| RLC_ji_AC207234_9488           | 11,265 | 14,240 | 0.1  | 4.84E-13 |
| RLG_doke_AC186158_1307         | 959    | 945    | 0.5  | 4.90E-13 |
| RLG_huck_AC208842_10038        | 1,130  | 1,152  | 0.4  | 1.17E-12 |
| RLG_cinful-zeon_AC186614_1565  | 3,470  | 5,641  | -0.2 | 1.31E-12 |
| RLC_ji_AC202456_7443           | 9,196  | 11,540 | 0.1  | 2.34E-12 |
| RLX_nisow_AC208616_9947        | 58     | 213    | -1.4 | 9.78E-12 |
| RIX_loneok_AC193379-0          | 812    | 1,522  | -0.4 | 1.78E-11 |
| RLG_mujo_AC186807_1674         | 450    | 924    | -0.6 | 2.85E-11 |
| RLX_bori_AC190960_100          | 244    | 172    | 1.0  | 3.80E-11 |
| RLX_naadira_AC201761_7053      | 1,903  | 2,132  | 0.3  | 6.47E-11 |
| RLG_prem1_AC191715_3282        | 17,932 | 26,569 | -0.1 | 8.07E-11 |
| RLC_wiwa_AC191531_3153         | 405    | 839    | -0.6 | 1.06E-10 |
| RLG_huck_AC199444_6460         | 633    | 603    | 0.5  | 2.44E-10 |
| RLG_cinful-zeon_AC206171_9091  | 5,357  | 8,329  | -0.2 | 5.18E-10 |
| RLG_cinful-zeon_AC199960_6694  | 2,875  | 4,648  | -0.2 | 6.76E-10 |
| RLG_gyte_AC207411_9568         | 487    | 954    | -0.5 | 2.09E-09 |
| RLX_kahoba_AC186618_29         | 340    | 288    | 0.7  | 3.58E-09 |
| RLX_peekve_AC209948_10499      | 3,164  | 5,051  | -0.2 | 3.65E-09 |
| RLC_opie_AC188002_2029         | 3,549  | 4,289  | 0.2  | 5.29E-09 |
| RLC_sawujo_AC193398_3610       | 1,133  | 1,222  | 0.4  | 5.37E-09 |
| RLG_cinful-zeon_AC186530_1513  | 12,546 | 18,686 | -0.1 | 5.59E-09 |
| RLG_cinful-zeon_AC208661_9976  | 2,102  | 3,445  | -0.2 | 9.72E-09 |
| RLG_gyma_AC212146_11616        | 917    | 1,628  | -0.4 | 1.05E-08 |
| RLG_cinful-zeon_AC208228_9805  | 6,851  | 10,432 | -0.1 | 1.41E-08 |
| RLC_ji_AC211489_11215          | 10,988 | 14,153 | 0.1  | 1.47E-08 |
| RLX_oweiw_AC190860_2662        | 45     | 159    | -1.3 | 1.83E-08 |
| RLG_cinful-zeon_AC199396_6426  | 2,658  | 4,252  | -0.2 | 4.77E-08 |
| RLX_uwum_AC213069_12092        | 4,232  | 5,219  | 0.2  | 4.88E-08 |
| RLX_leso_AC215500_13080        | 568    | 560    | 0.5  | 5.32E-08 |
| RLG_xilon-diguus_AC203313_7774 | 52,621 | 75,427 | -0.0 | 6.12E-08 |
| RLG_huck_AC214833_12913        | 447    | 425    | 0.5  | 1.20E-07 |
| RLX_hoda_AC193645_3730         | 53     | 169    | -1.2 | 1.22E-07 |
| RLX_alaw_AC197914_166          | 315    | 276    | 0.7  | 1.23E-07 |
| RLX_ube1_AC183941_731          | 38     | 136    | -1.4 | 1.55E-07 |
| RLX_ojah_AC184792_875          | 1,664  | 1,924  | 0.3  | 2.31E-07 |
| RLG_ansuya_AC191576_3184       | 853    | 1,491  | -0.3 | 3.34E-07 |
| RLX_mada_AC208456_9876         | 574    | 580    | 0.5  | 3.43E-07 |
| RLG_huck_AC203007_7610         | 777    | 824    | 0.4  | 3.47E-07 |
| RLG_cinful-zeon_AC195790_4706  | 1,867  | 3,031  | -0.2 | 4.35E-07 |
| RIX_pyelum_AC203928-0          | 813    | 1,424  | -0.3 | 4.68E-07 |
| RLG_cinful-zeon_AC205768_9013  | 11,932 | 17,619 | -0.1 | 8.83E-07 |
| RLG_huck_AC210804_10865        | 1,232  | 1,398  | 0.3  | 1.20E-06 |
| RLX_kawivo_AC186793_30         | 791    | 851    | 0.4  | 1.25E-06 |
| RLC_lusi_AC198175_5903         | 9      | 61     | -2.3 | 1.25E-06 |

|                                |        |        |      |          |
|--------------------------------|--------|--------|------|----------|
| RLX_teki_AC202867_7492         | 34     | 8      | 2.6  | 1.38E-06 |
| RLG_cinful-zeon_AC200200_6794  | 3,016  | 4,715  | -0.2 | 1.54E-06 |
| RLX_dala_AC216254_13336        | 259    | 226    | 0.7  | 1.59E-06 |
| RLG_cinful-zeon_AC193672_3742  | 11,721 | 17,284 | -0.1 | 1.97E-06 |
| RLX_vafim_AC196676_5176        | 38     | 127    | -1.3 | 2.10E-06 |
| RLG_riiryl_AC193745_3743       | 1,688  | 1,988  | 0.2  | 2.83E-06 |
| RLC_kameer_AC194009_3819       | 84     | 216    | -0.9 | 3.19E-06 |
| RLG_huck_AC186577_1525         | 2,020  | 2,417  | 0.2  | 3.60E-06 |
| RLG_cinful-zeon_AC191398_3106  | 1,963  | 3,139  | -0.2 | 3.66E-06 |
| RIL_etiti_AC211734-0           | 419    | 778    | -0.4 | 5.30E-06 |
| RLG_prem1_AC215184_12949       | 23,209 | 33,573 | -0.1 | 5.77E-06 |
| RLG_cinful-zeon_AC177813_189   | 13,225 | 19,382 | -0.1 | 6.33E-06 |
| RLG_cinful-zeon_AC216587_13387 | 2,770  | 4,314  | -0.2 | 9.18E-06 |
| RLX_bobeg_AC193485_3670        | 216    | 187    | 0.7  | 9.64E-06 |
| RLG_apil_AC198662_6085         | 8      | 52     | -2.2 | 9.88E-06 |
| RLC_tata_AC205418_8792         | 49     | 143    | -1.1 | 1.30E-05 |
| RLG_grande_AC214148_12520      | 2,647  | 3,254  | 0.2  | 1.30E-05 |
| RLC_stonor_AC212476_11849      | 269    | 527    | -0.5 | 1.33E-05 |
| RLC_ulyg_AC196397_5082         | 8,605  | 12,746 | -0.1 | 1.37E-05 |
| RLG_doke_AC197224_5479         | 6,271  | 8,063  | 0.1  | 1.84E-05 |
| RLX_vusu_AC187081_1751         | 119    | 270    | -0.7 | 2.14E-05 |
| RLX_mibaab_AC205139_8652       | 9      | 53     | -2.1 | 2.57E-05 |
| RLG_gyma_AC189750_2238         | 3,972  | 6,041  | -0.1 | 3.03E-05 |
| RLG_cinful-zeon_AC194588_4160  | 7,182  | 10,665 | -0.1 | 3.95E-05 |
| RLG_cinful-zeon_AC207332_9527  | 3,646  | 5,558  | -0.1 | 4.40E-05 |
| RLC_opie_AC202020_7258         | 4,200  | 5,335  | 0.1  | 5.65E-05 |
| RLC_opie_AC196469_5133         | 12,715 | 18,546 | -0.1 | 6.79E-05 |
| RLX_demo_AC202036_173          | 203    | 406    | -0.5 | 6.79E-05 |
| RLG_cinful-zeon_AC194967_4388  | 3,078  | 4,719  | -0.1 | 6.92E-05 |
| RLG_cinful-zeon_AC177930_407   | 3,587  | 5,459  | -0.1 | 7.09E-05 |
| RLG_lata_AC191117_2960         | 944    | 1,559  | -0.2 | 8.88E-05 |
| RLX_uwum_AC177933_415          | 7,207  | 10,668 | -0.1 | 9.65E-05 |
| RLC_ekoj_AC194603_4173         | 742    | 834    | 0.3  | 1.10E-04 |
| RLG_cinful-zeon_AC203825_7980  | 2,490  | 3,831  | -0.1 | 2.41E-04 |
| RLG_huck_AC208546_9913         | 543    | 595    | 0.3  | 2.52E-04 |
| RLG_lyruom_AC185669_1267       | 20     | 72     | -1.4 | 2.58E-04 |
| RLC_anar_AC206985_9422         | 202    | 393    | -0.5 | 3.15E-04 |
| RLX_milt_AC211742_11402        | 2,298  | 3,537  | -0.1 | 4.27E-04 |
| RLX_ywely_AC190897_98          | 97     | 212    | -0.7 | 5.87E-04 |
| RLG_gyma_AC197250_5506         | 5,324  | 6,909  | 0.1  | 6.83E-04 |
| RLG_cinful-zeon_AC199790_6582  | 6,646  | 9,785  | -0.1 | 7.71E-04 |
| RLG_cinful-zeon_AC207755_9705  | 7,239  | 10,629 | -0.1 | 8.28E-04 |
| RLG_feki_AC195127_4412         | 30     | 88     | -1.1 | 8.28E-04 |
| RLX_daju_AC190492_79           | 18     | 63     | -1.3 | 9.00E-04 |
| RLX_ebel_AC210216_10670        | 72     | 165    | -0.7 | 1.18E-03 |
| RLG_cinful-zeon_AC211144_11003 | 3,624  | 5,427  | -0.1 | 1.42E-03 |
| RLX_ebel_AC188777_2128         | 86     | 187    | -0.6 | 1.51E-03 |

|                                |        |        |      |          |
|--------------------------------|--------|--------|------|----------|
| RLX_liove_AC207121_9462        | 3,335  | 5,005  | -0.1 | 1.65E-03 |
| RLX_bida_AC205396_8768         | 1,182  | 1,867  | -0.2 | 1.68E-03 |
| RLG_apil_AC204354_8209         | 6      | 33     | -2.0 | 1.73E-03 |
| RLG_cinful-zeon_AC209373_10201 | 6,418  | 9,417  | -0.1 | 2.10E-03 |
| RLX_ebel_AC211737_11397        | 82     | 178    | -0.6 | 2.15E-03 |
| RLX_lamyab_AC208713_10008      | 9      | 40     | -1.7 | 2.27E-03 |
| RLC_nida_AC206942_9401         | 3,749  | 4,837  | 0.1  | 2.34E-03 |
| RLC_victim_AC183319_577        | 137    | 270    | -0.5 | 2.36E-03 |
| RLX_petopi_AC195376_4582       | 15     | 53     | -1.3 | 2.50E-03 |
| RLC_opie_AC187207_1792         | 6,480  | 8,517  | 0.1  | 2.58E-03 |
| RLG_prem1_AC186287_1362        | 9,183  | 13,341 | -0.1 | 2.64E-03 |
| RLX_naseup_AC196428_5108       | 3,197  | 4,108  | 0.1  | 3.10E-03 |
| RIX_totyru_AC203014-0          | 151    | 291    | -0.5 | 3.15E-03 |
| RLX_jelat_AC194217_3960        | 26     | 74     | -1.0 | 3.43E-03 |
| RLG_cinful-zeon_AC213887_12415 | 4,325  | 6,403  | -0.1 | 3.45E-03 |
| RLX_gufa_AC194066_3854         | 42     | 104    | -0.8 | 4.11E-03 |
| RLX_baso_AC192251_3423         | 649    | 759    | 0.2  | 4.29E-03 |
| RLG_boja_AC200053_6723         | 9      | 38     | -1.6 | 4.80E-03 |
| RLX_mako_AC200748_6991         | 54     | 124    | -0.7 | 5.30E-03 |
| RLX_fanuab_AC193594_3712       | 11     | 42     | -1.5 | 5.64E-03 |
| RLX_nuhan_AC206272_9161        | 2,182  | 3,299  | -0.1 | 6.04E-03 |
| RLC_opie_AC214122_12495        | 5,466  | 7,183  | 0.1  | 6.09E-03 |
| RLX_osed_AC191084_2931         | 595    | 695    | 0.2  | 6.09E-03 |
| RLG_cinful-zeon_AC183943_734   | 2,111  | 3,192  | -0.1 | 6.95E-03 |
| RLX_mafigi_AC216705_13396      | 12     | 43     | -1.4 | 6.95E-03 |
| RLX_milt_AC194936_4356         | 763    | 1,219  | -0.2 | 7.05E-03 |
| RLG_cinful-zeon_AC208420_9852  | 3,383  | 5,024  | -0.1 | 7.18E-03 |
| RLX_pute_AC197188_5467         | 140    | 266    | -0.5 | 7.18E-03 |
| RLC_gudyeg_AC206942_9404       | 510    | 837    | -0.2 | 8.02E-03 |
| RLX_tekay_AC211245_11065       | 5,429  | 7,946  | -0.1 | 8.02E-03 |
| RLX_yreud_AC198385_5976        | 550    | 898    | -0.2 | 8.02E-03 |
| RLC_bote_AC211535_11252        | 10     | 38     | -1.5 | 8.62E-03 |
| RLG_aneas_AC203312_7773        | 15     | 49     | -1.2 | 8.99E-03 |
| RLX_dugiab_AC207724_9683       | 8,602  | 11,456 | 0.1  | 8.99E-03 |
| RLX_lamyab_AC215655_13126      | 32     | 81     | -0.9 | 1.11E-02 |
| RLX_pibo_AC201915_172          | 35     | 86     | -0.8 | 1.13E-02 |
| RLC_ruda_AC206281_9164         | 1,466  | 1,841  | 0.1  | 1.17E-02 |
| RLX_japov_AC213985_12447       | 320    | 356    | 0.3  | 1.20E-02 |
| RLX_etug_AC187099_1770         | 77     | 159    | -0.6 | 1.21E-02 |
| RIX_keneat_AC209697-0          | 145    | 268    | -0.4 | 1.41E-02 |
| RLX_bumy_AC216354_13379        | 281    | 481    | -0.3 | 1.41E-02 |
| RLG_ywyt_AC209975_10517        | 494    | 579    | 0.2  | 1.57E-02 |
| RLX_milt_AC209648_10275        | 379    | 629    | -0.3 | 1.61E-02 |
| RLG_grande_AC190611_2432       | 2,250  | 3,365  | -0.1 | 1.71E-02 |
| RLX_hesa_AC204349_8207         | 10     | 36     | -1.4 | 1.71E-02 |
| RLX_hopsotch_AC209396_10229    | 29     | 73     | -0.9 | 1.71E-02 |
| RLC_leviathan_AC208826_10024   | 11,307 | 16,226 | -0.0 | 1.88E-02 |

|                               |        |        |      |          |
|-------------------------------|--------|--------|------|----------|
| RLC_wamenu_AC191287_3028      | 80     | 160    | -0.5 | 1.89E-02 |
| RLX_vedi_AC198992_6258        | 227    | 394    | -0.3 | 1.89E-02 |
| RLG_grande_AC214497_12729     | 1,753  | 2,644  | -0.1 | 1.92E-02 |
| RLX_wiolus_AC210058_10567     | 5      | 24     | -1.8 | 1.93E-02 |
| RLX_halo_AC205330_8725        | 3      | 19     | -2.2 | 2.06E-02 |
| RLC_bipide_AC205969_9058      | 128    | 236    | -0.4 | 2.73E-02 |
| RLG_ivuk_AC194103_3869        | 1      | 12     | -3.1 | 2.81E-02 |
| RLC_ruda_AC195952_4839        | 1,905  | 2,448  | 0.1  | 2.84E-02 |
| RLC_vuna_AC193505_121         | 1      | 13     | -3.2 | 2.90E-02 |
| RLG_yfages_AC197085_5383      | 5      | 23     | -1.7 | 2.90E-02 |
| RLG_boha_AC205574_8933        | 4      | 20     | -1.8 | 3.08E-02 |
| RLX_mada_AC215312_13067       | 2,779  | 4,103  | -0.1 | 3.14E-02 |
| RLX_uwub_AC195372_161         | 693    | 1,086  | -0.2 | 3.29E-02 |
| RLC_raider_AC209705_10304     | 103    | 194    | -0.4 | 3.30E-02 |
| RLX_arar_AC208428_9858        | 12     | 37     | -1.2 | 3.35E-02 |
| RLX_panen_AC192606_115        | 294    | 490    | -0.3 | 3.38E-02 |
| RLC_nida_AC201982_7215        | 3,850  | 5,076  | 0.1  | 3.71E-02 |
| RLX_lyna_AC194093_3868        | 146    | 260    | -0.4 | 3.83E-02 |
| RLG_cinful-zeon_AC201757_7049 | 10,158 | 13,673 | 0.0  | 4.03E-02 |
| RLG_cinful-zeon_AC206615_9266 | 7,913  | 11,381 | -0.1 | 4.03E-02 |
| RLG_fourf_AC202975_7570       | 1,285  | 1,945  | -0.1 | 4.04E-02 |
| RLX_toro_AC197199_5471        | 124    | 225    | -0.4 | 4.05E-02 |
| RLG_cinful-zeon_AC205118_8623 | 2,142  | 3,178  | -0.1 | 4.31E-02 |
| RLX_eugene_AC200048_6717      | 2,036  | 2,637  | 0.1  | 4.35E-02 |
| RLC_opie_AC211653_11340       | 7,072  | 9,466  | 0.1  | 4.47E-02 |
| RLG_laiwa_AC214288_12602      | 4      | 19     | -1.8 | 4.47E-02 |
| RLC_dadeir_AC201957_7187      | 2      | 14     | -2.3 | 4.77E-02 |
| RLX_ovev_AC199878_6641        | 7      | 26     | -1.4 | 4.77E-02 |
| RLC_tiwe_AC187032_1709        | 17     | 45     | -0.9 | 4.82E-02 |
| RLC_dolovu_AC211740_11400     | 3      | 17     | -2.0 | 4.84E-02 |

<sup>a</sup> The number of reads mapped to each gene model from mutant and non-mutant RNA-seq

<sup>b</sup>  $\log_2$  transformation of foldchange as the relative abundance of transcripts in mutants/non-mutants

<sup>c</sup> The false discovery rate calculated using Benjamini and Hochberg's procedure for the p value from Fisher's exact test
