# Supplementary material for: Loss of RNA–Dependent RNA Polymerase 2 (RDR2) Function Causes Widespread and Unexpected Changes in the Expression of Transposons, Genes, and 24-nt Small RNAs
Source: PubMed Central journal article supplement (PMC2774947; doi:10.1371/journal.pgen.1000737), 2009-11-20
Supplement: pgen.1000737.s012.pdf [file pgen.1000737.s012.pdf]

**Table S7.** List of RDR2-sensitive and RDR2-resistant 24 nt siRNAs

| siRNA sequence            | No. 24 nt siRNAs |            | Type           |
|---------------------------|------------------|------------|----------------|
|                           | Mutant           | Non-mutant |                |
| AAAAAAAAAAAAAAAAAAAAAAAAA | 14               | 0          | RDR2-resistant |
| AAAAAATCGAGAGGACGGTGGCAT  | 0                | 9          | RDR2-sensitive |
| AAAAAGCTCGTAGTTGGACCTTGG  | 90               | 21         | RDR2-resistant |
| AAAATACTCGTTTGGCACGGCTC   | 0                | 9          | RDR2-sensitive |
| AAAATACTGTAGAAGCCGCAGCC   | 2                | 18         | RDR2-sensitive |
| AAAAATTGTGTGCTTTGAGCCGGC  | 0                | 10         | RDR2-sensitive |
| AAAAATTGTTGGGCTTTCTTGGC   | 0                | 15         | RDR2-sensitive |
| AAAACACTCGGCAAAGAATATGGC  | 0                | 17         | RDR2-sensitive |
| AAAACCACAATCGTGATATCGGAG  | 51               | 6          | RDR2-resistant |
| AAAACCCGGGCTGTGAGAGGAGGG  | 2                | 25         | RDR2-sensitive |
| AAAACCGGATGCAGAAGATGTACG  | 49               | 0          | RDR2-resistant |
| AAAACCGTTCGAGCTAGGCTAGCAC | 0                | 23         | RDR2-sensitive |
| AAAACGCGACGGGGCATTGTAAGT  | 74               | 1          | RDR2-resistant |
| AAAACGGCTGGCTCTTTGATGGCT  | 0                | 19         | RDR2-sensitive |
| AAAACGGTTCGAAACGGTATTTAT  | 1                | 23         | RDR2-sensitive |
| AAAACGTCACTGTAAATAGGTTTA  | 0                | 14         | RDR2-sensitive |
| AAAAC TAGGACAGAACGGCTCCGT | 0                | 43         | RDR2-sensitive |
| AAAAC TCAACGTTGATCCGTGGC  | 16               | 0          | RDR2-resistant |
| AAAAC TCGATTCAATCGTCTGCT  | 46               | 0          | RDR2-resistant |
| AAAAC TCGGACAGAACGGCTCCAT | 0                | 9          | RDR2-sensitive |
| AAAAC TGGGACAGAACGGCTCCAT | 0                | 9          | RDR2-sensitive |
| AAAAC TGGGACAGAACGGCTCCGT | 1                | 55         | RDR2-sensitive |
| AAAAC TGGGATAGAACGGCTCCGT | 0                | 10         | RDR2-sensitive |
| AAAAC TGTTACCTCGGCGTCAT   | 0                | 10         | RDR2-sensitive |
| AAAAGAGCTCAAAGCCTGCGGCAC  | 0                | 15         | RDR2-sensitive |
| AAAAGAGGGTGGCATAGA ACTGAG | 31               | 2          | RDR2-resistant |
| AAAAGGAACCAACGGACAGGGCAA  | 0                | 10         | RDR2-sensitive |
| AAAAGGATGGTAGTGGTGGGGAAT  | 0                | 10         | RDR2-sensitive |
| AAAAGGCGGCTCAGCTATGAAGAG  | 0                | 10         | RDR2-sensitive |
| AAAAGGCTGGCTTGC GTTCGCTTC | 1                | 12         | RDR2-sensitive |
| AAAAGGGCGGGCCTGGTTTATTTT  | 14               | 0          | RDR2-resistant |
| AAAAGGTTAAGAAGGTATGATAAC  | 36               | 1          | RDR2-resistant |
| AAAAGTACTCGCAAAGAGGCTGT   | 1                | 12         | RDR2-sensitive |
| AAAAGTGTGTGACTCGTGCGGTGC  | 23               | 0          | RDR2-resistant |
| AAAAGTTATGGACTGACGGTTGGT  | 0                | 9          | RDR2-sensitive |
| AAAAGTTGTAGTTTTATTAGCAGA  | 15               | 0          | RDR2-resistant |
| AAAATACAATGTTATTTTCGTCCG  | 1                | 14         | RDR2-sensitive |
| AAAATACTGTAGAAGCCGCAGCCG  | 0                | 13         | RDR2-sensitive |
| AAAATACTGTAGATGGCGTTGTTT  | 0                | 12         | RDR2-sensitive |
| AAAATAGAAGGTTATTTTCGTCCG  | 0                | 11         | RDR2-sensitive |
| AAAATAGGACACATTTTCGTCCGT  | 0                | 12         | RDR2-sensitive |
| AAAATATCTGATCTGTTAGATGGT  | 50               | 0          | RDR2-resistant |
| AAAATGGTTGTCCATATGTCGGAT  | 0                | 13         | RDR2-sensitive |
| AAAATGTAGTTAGCGGAGTGGCTC  | 26               | 0          | RDR2-resistant |
| AAAATGTGGCTGTACGGACGCGGA  | 0                | 9          | RDR2-sensitive |
| AAAATTCACCGGACTGTACGGTAT  | 1                | 30         | RDR2-sensitive |

|                            |    |    |                |
|----------------------------|----|----|----------------|
| AAAATTCATCGGACTGTTCGGTGT   | 0  | 10 | RDR2-sensitive |
| AAAATTGGAGGGACGAGAGAGGAC   | 1  | 21 | RDR2-sensitive |
| AAAATTTACCGGACTGTTCGGTGT   | 0  | 11 | RDR2-sensitive |
| AAAATTTAGTTTGAAACGGAAGC    | 17 | 1  | RDR2-resistant |
| AAACAAAAACTGGACTTGGCTAT    | 14 | 0  | RDR2-resistant |
| AAACAAATCTTGGTCGTCCCCTTC   | 74 | 2  | RDR2-resistant |
| AAACAACCTAATTTGAGGGATCGT   | 2  | 15 | RDR2-sensitive |
| AAACAACCTTATTTGAGGGATCGT   | 1  | 26 | RDR2-sensitive |
| AAACAACGGGCTTCGTGTCGGGCT   | 0  | 9  | RDR2-sensitive |
| AAACAACCTGCAACAGTGTCTGGCTT | 1  | 13 | RDR2-sensitive |
| AAACAATCTAAACTCTGGAGCAGA   | 0  | 14 | RDR2-sensitive |
| AAACACAGAACAGAGCGGCTCCGT   | 1  | 18 | RDR2-sensitive |
| AAACACGGACTCTGTCTGGTCAACC  | 2  | 28 | RDR2-sensitive |
| AAACTGCGGAGAGACTAAGGCG     | 21 | 1  | RDR2-resistant |
| AAACAGGACAAAGGACGGAGGCGT   | 0  | 11 | RDR2-sensitive |
| AAACAGGAGCTGAGCTATGGTCAA   | 0  | 17 | RDR2-sensitive |
| AAACATACTGCACTGTAGTAGGCT   | 0  | 20 | RDR2-sensitive |
| AAACATGCTCGGGCTGGGTCTGGGC  | 0  | 13 | RDR2-sensitive |
| AAACATGGTCGTGAACTTGGCATC   | 4  | 62 | RDR2-sensitive |
| AAACATTGATGGGACAGGGGCTA    | 0  | 12 | RDR2-sensitive |
| AAACATTGATCTAGGAGACCATGA   | 48 | 4  | RDR2-resistant |
| AAACCAATGGTTTAGATTGTTGGA   | 0  | 18 | RDR2-sensitive |
| AAACCAGCGACTGCAGCGAGAGAC   | 0  | 13 | RDR2-sensitive |
| AAACCATTTAAGATCATGTTCCGGT  | 1  | 32 | RDR2-sensitive |
| AAACCCATCGGACGACACGAGCAT   | 0  | 10 | RDR2-sensitive |
| AAACCCGGCAGATAGCGCGATCAC   | 1  | 12 | RDR2-sensitive |
| AAACCCGGGCTGTGAGAGGAGGGG   | 0  | 16 | RDR2-sensitive |
| AAACCGTTGGATCTAGATTGGATG   | 0  | 10 | RDR2-sensitive |
| AAACCTAGGCTGATAGAGGAGGGA   | 0  | 11 | RDR2-sensitive |
| AAACCTCGGGCAGGAGACAGTCAC   | 0  | 15 | RDR2-sensitive |
| AAACCTGAGTATCGTTGGGATTAC   | 0  | 13 | RDR2-sensitive |
| AAACCTGCTCTGCACCGGCTCTGC   | 0  | 10 | RDR2-sensitive |
| AAACCTGGGAACCGGCAAAGACAT   | 1  | 19 | RDR2-sensitive |
| AAACCTGGGAACCGGCAAAGATGT   | 0  | 9  | RDR2-sensitive |
| AAACCTGTTTTTGAGCTCGTTGGC   | 0  | 23 | RDR2-sensitive |
| AAACCTTTGGCATGGTTTGTCCGGT  | 80 | 0  | RDR2-resistant |
| AAACGAATTTTATAGAAGCTGGCT   | 2  | 17 | RDR2-sensitive |
| AAACGACGAGATCAACGACGCGAT   | 0  | 9  | RDR2-sensitive |
| AAACGACGGCAGAACCGGTGCTG    | 0  | 13 | RDR2-sensitive |
| AAACGACGGTATCTGACTTTGTGC   | 36 | 0  | RDR2-resistant |
| AAACGACTTTGGCTCTTTGATGGC   | 0  | 15 | RDR2-sensitive |
| AAACGAGACTGATTGATAGCGCAT   | 0  | 11 | RDR2-sensitive |
| AAACGAGTGATAGAACTTGGCCGT   | 28 | 4  | RDR2-resistant |
| AAACGCACGAACGGACAATGGCGA   | 0  | 9  | RDR2-sensitive |
| AAACGCGACGGGGCATTGTAAGTG   | 22 | 2  | RDR2-resistant |
| AAACGCGGAATAGAACGGCTCCAT   | 1  | 73 | RDR2-sensitive |
| AAACGGACCCAGGAACGTGCGGAT   | 0  | 25 | RDR2-sensitive |
| AAACGGACCGAGCTGAGTCTGGGCT  | 0  | 40 | RDR2-sensitive |
| AAACGGACCGGCACGGTAAGTCGT   | 1  | 21 | RDR2-sensitive |

|                           |    |    |                |
|---------------------------|----|----|----------------|
| AAACGGACGTATCTGGTCGGCTAG  | 0  | 15 | RDR2-sensitive |
| AAACGGATCGGACCGAGTCGGTAA  | 0  | 11 | RDR2-sensitive |
| AAACGGCGTGTAGACGTGCGGCTT  | 1  | 28 | RDR2-sensitive |
| AAACGGCTCTGGCTCCTTGATGGC  | 0  | 25 | RDR2-sensitive |
| AAACGGCTCTGGCTCTTTGATGGC  | 0  | 24 | RDR2-sensitive |
| AAACGGCTGGCTCTTTGATGGCTC  | 0  | 9  | RDR2-sensitive |
| AAACGGGCCGGGCTGTCTAGGCAC  | 0  | 9  | RDR2-sensitive |
| AAACGGGCCGGATACGGACGGATAA | 0  | 22 | RDR2-sensitive |
| AAACGGGCCGGATACGGACGGATAG | 0  | 65 | RDR2-sensitive |
| AAACGGGCCGGATACGGACGGATAT | 0  | 84 | RDR2-sensitive |
| AAACGGGCTAAACGGGCTAAACGG  | 0  | 9  | RDR2-sensitive |
| AAACGGGCTATATGGGCTAAACGG  | 1  | 17 | RDR2-sensitive |
| AAACGGTTTGTAGAAGACATCGGC  | 0  | 13 | RDR2-sensitive |
| AAACGTAGGACGTAATGGCCCAT   | 0  | 10 | RDR2-sensitive |
| AAACGTAGGGCTCTTTGATGGGCT  | 0  | 9  | RDR2-sensitive |
| AAACGTCACTGTAAATATGTTTAG  | 0  | 10 | RDR2-sensitive |
| AAACGTGTCGTGCTGGTCCGGCTA  | 3  | 45 | RDR2-sensitive |
| AAACGTTGAGATTGTTCCAGGAGA  | 82 | 6  | RDR2-resistant |
| AAACTAACAGTTTAGATCGTTGGA  | 0  | 11 | RDR2-sensitive |
| AAACTAAGTTGGATAGACAGGCGT  | 0  | 10 | RDR2-sensitive |
| AAACTCTCGTAGACGTGCTGGTAT  | 0  | 12 | RDR2-sensitive |
| AAACTCTGCTGCATATTGTTAAGT  | 14 | 0  | RDR2-resistant |
| AAACTCTGGGTGGAGCAGCTCTGC  | 0  | 39 | RDR2-sensitive |
| AAACTGACAAGTTCCTGATGTGCC  | 21 | 2  | RDR2-resistant |
| AAACTGAGCACAGGATGGACGCAA  | 0  | 14 | RDR2-sensitive |
| AAACTGGACCAGAACGGCTCTTGG  | 0  | 15 | RDR2-sensitive |
| AAACTGGAGAAACCTAACGGGCAG  | 0  | 10 | RDR2-sensitive |
| AAACTGTAGCCCCTATACGGTGAA  | 0  | 9  | RDR2-sensitive |
| AAACTGTAGCTCCTAAACGGTGAA  | 0  | 13 | RDR2-sensitive |
| AAACTGTAGCTGTATGGCCGCAA   | 0  | 11 | RDR2-sensitive |
| AAACTGTATCTTCACTAGGGCGGT  | 0  | 9  | RDR2-sensitive |
| AAACTGTGAATACGTCATCTAGCC  | 22 | 0  | RDR2-resistant |
| AAACTGTGGCTCTTGACCAGTGGC  | 0  | 18 | RDR2-sensitive |
| AAACTGTTAGTCGGTATATGTTAG  | 0  | 21 | RDR2-sensitive |
| AAACTTAGACACGATGGACGGTAT  | 0  | 13 | RDR2-sensitive |
| AAACTTATCTGTGAGTTTGAGCGC  | 0  | 15 | RDR2-sensitive |
| AAACTTCACTCTGCAAACGGTGTT  | 0  | 10 | RDR2-sensitive |
| AAACTTTAGAGCACGGGCTGGCAT  | 0  | 9  | RDR2-sensitive |
| AAACTTTGATTAGCCGGAACGATT  | 7  | 51 | RDR2-sensitive |
| AAACTTTGATTAGCTGAAACGATT  | 2  | 16 | RDR2-sensitive |
| AAACTTTGATTAGCTGGAACGATT  | 16 | 37 | RDR2-sensitive |
| AAAGAACCCTAACCCCTAGGGCTGC | 0  | 14 | RDR2-sensitive |
| AAAGAACCGGAACCGAGGAACCGA  | 1  | 16 | RDR2-sensitive |
| AAAGAACCGGAACCGAGGAGTCGA  | 0  | 11 | RDR2-sensitive |
| AAAGAACGTCGCTGACTGAGGCAT  | 0  | 16 | RDR2-sensitive |
| AAAGAACTCTTGACAACTGGTATT  | 18 | 1  | RDR2-resistant |
| AAAGAAGACTGTAAAGGACGGATA  | 0  | 22 | RDR2-sensitive |
| AAAGAAGCAGGAGCTGGAGCTTTG  | 0  | 19 | RDR2-sensitive |
| AAAGAAGGAAACCTGGGAACCGGC  | 1  | 42 | RDR2-sensitive |

|                           |    |    |                |
|---------------------------|----|----|----------------|
| AAAGAAGGCTTTGCCGAGTGCCGC  | 0  | 22 | RDR2-sensitive |
| AAAGAATTTGAGCTCAGATGCGCG  | 17 | 1  | RDR2-resistant |
| AAAGAATTTGTCAGCAGCTTTATG  | 14 | 0  | RDR2-resistant |
| AAAGACAACCTGGACCGAGCACAT  | 0  | 10 | RDR2-sensitive |
| AAAGACATGTTTGGATGGCTGCAC  | 0  | 9  | RDR2-sensitive |
| AAAGACCTGTAGGTGAGAGACCGC  | 0  | 49 | RDR2-sensitive |
| AAAGACTAAGATCATTATTGATGG  | 29 | 0  | RDR2-resistant |
| AAAGACTAGAGCTGGAGTGGGTGT  | 14 | 0  | RDR2-resistant |
| AAAGACTGGCTCGAAACGTTGGCT  | 0  | 11 | RDR2-sensitive |
| AAAGAGAAGAACTACGAATAGATT  | 30 | 1  | RDR2-resistant |
| AAAGAGACCTGGGCGTACCTGCGA  | 0  | 14 | RDR2-sensitive |
| AAAGAGCACAGACCTGGGCACCGG  | 0  | 17 | RDR2-sensitive |
| AAAGAGGGCTCGGCAACAGTACAT  | 1  | 43 | RDR2-sensitive |
| AAAGAGGTTGAGAACGGCATCTAT  | 19 | 0  | RDR2-resistant |
| AAAGATATCGGTCTAAATAATCTC  | 20 | 0  | RDR2-resistant |
| AAAGATCACGGACCAAGCAGGCGT  | 0  | 10 | RDR2-sensitive |
| AAAGATCTCAAAGCGTCGAATGTC  | 19 | 0  | RDR2-resistant |
| AAAGATGTGTATGTTGCGTTGGAT  | 25 | 2  | RDR2-resistant |
| AAAGATTAAGAGATCATATGTGCA  | 17 | 0  | RDR2-resistant |
| AAAGATTTTCTTCAATCGTCAC    | 43 | 4  | RDR2-resistant |
| AAAGCAATCTTTCGGATCGGCTGG  | 0  | 11 | RDR2-sensitive |
| AAAGCACCAGTTTCAACGGTCGTC  | 0  | 9  | RDR2-sensitive |
| AAAGCACCCTGAACCCGGCTCTGC  | 0  | 12 | RDR2-sensitive |
| AAAGCACGGACTGTTTCGGTGCAC  | 0  | 31 | RDR2-sensitive |
| AAAGCAGATGTAGGCCCACTCGCT  | 0  | 9  | RDR2-sensitive |
| AAAGCAGCAGCTTTCTGTCTCGG   | 4  | 25 | RDR2-sensitive |
| AAAGCAGGACATCGGTTCACTCAC  | 0  | 9  | RDR2-sensitive |
| AAAGCCTCGGATTCCGGTAGTGAT  | 0  | 10 | RDR2-sensitive |
| AAAGCCTTCGTCGGAGAAGGATGG  | 0  | 16 | RDR2-sensitive |
| AAAGCGAAGTCCGGACAGTCCGCC  | 17 | 0  | RDR2-resistant |
| AAAGCGACTACAGAGGACAGTCAA  | 1  | 13 | RDR2-sensitive |
| AAAGCGCTTCGTCTCGCAGTCGGC  | 0  | 9  | RDR2-sensitive |
| AAAGCGGTCAGACGGTGGAGACAG  | 0  | 21 | RDR2-sensitive |
| AAAGCGTGACTTCAACGGCCTCAT  | 0  | 21 | RDR2-sensitive |
| AAAGCGTGTATCCGGATCGTTGGT  | 0  | 23 | RDR2-sensitive |
| AAAGCTACCTCCGGTTGTCGCGAT  | 20 | 0  | RDR2-resistant |
| AAAGCTAGAACATGCTACGCAGTG  | 14 | 0  | RDR2-resistant |
| AAAGCTCAGCGGATAACGGGTCGT  | 0  | 11 | RDR2-sensitive |
| AAAGCTCCGTCCGGCTACGTATCAC | 60 | 0  | RDR2-resistant |
| AAAGCTCGACTGTGAAGGGGCCGG  | 0  | 10 | RDR2-sensitive |
| AAAGCTCGCTTCAAGGTCGTGGAT  | 22 | 0  | RDR2-resistant |
| AAAGCTCTGGACATGTCAGACTGC  | 0  | 9  | RDR2-sensitive |
| AAAGCTGAGCGTTTGGCAGTCCGC  | 0  | 10 | RDR2-sensitive |
| AAAGCTGCTGTAGCTGTAAGATGT  | 0  | 15 | RDR2-sensitive |
| AAAGCTGTATCTAGTGGCACTTGT  | 14 | 0  | RDR2-resistant |
| AAAGCTTAGACTCTAATTACGGTC  | 0  | 9  | RDR2-sensitive |
| AAAGGAACCTGGGACGGACGAGAAC | 0  | 10 | RDR2-sensitive |
| AAAGGACCCACAGCAGAACTGCTA  | 0  | 19 | RDR2-sensitive |
| AAAGGACCGTTAGAGGACGTTGC   | 6  | 55 | RDR2-sensitive |

|                           |    |    |                |
|---------------------------|----|----|----------------|
| AAAGGACGGATATAGAGGATGGAT  | 0  | 14 | RDR2-sensitive |
| AAAGGACGGATATAGAGGATGTAT  | 1  | 17 | RDR2-sensitive |
| AAAGGACGTTGCTGGAGATGACGA  | 0  | 10 | RDR2-sensitive |
| AAAGGACTACAGAGGACAGTCAAA  | 1  | 18 | RDR2-sensitive |
| AAAGGACTCCCAGCAGCAATCAGC  | 23 | 1  | RDR2-resistant |
| AAAGGAGACTGTAAAGGACGGATA  | 0  | 15 | RDR2-sensitive |
| AAAGGATGTAGATTTAGGCATTTG  | 0  | 10 | RDR2-sensitive |
| AAAGGATTTCTCTGTTTTCGGTGC  | 0  | 11 | RDR2-sensitive |
| AAAGGCAGAACGGTAGACTACCCCT | 0  | 15 | RDR2-sensitive |
| AAAGGCCATGTAGACAGGCGATGC  | 0  | 9  | RDR2-sensitive |
| AAAGGCCATGTAGACAGGCGATGT  | 0  | 10 | RDR2-sensitive |
| AAAGGCTAGAACTGATCCGGCTCT  | 0  | 42 | RDR2-sensitive |
| AAAGGCTCTGAGCGAACGGATCCT  | 0  | 11 | RDR2-sensitive |
| AAAGGCTCTGTCACTTGACGTCGT  | 0  | 10 | RDR2-sensitive |
| AAAGGCTGGTTATGTCTGACGGCT  | 0  | 13 | RDR2-sensitive |
| AAAGGGAGGTGCTGTAGCCGGCTA  | 1  | 42 | RDR2-sensitive |
| AAAGGGCTGGATCCAGGAAGCAGC  | 3  | 20 | RDR2-sensitive |
| AAAGGGCTGTTAGCAGACGTTTAT  | 0  | 10 | RDR2-sensitive |
| AAAGGGGTACGGCCGATTGAGAAC  | 0  | 12 | RDR2-sensitive |
| AAAGGGTGAGGACAACAGTGGCAT  | 1  | 12 | RDR2-sensitive |
| AAAGGTAGAACCAGCGTGAGCCGT  | 0  | 29 | RDR2-sensitive |
| AAAGGTAGTCGTTTAGGACATGAT  | 1  | 67 | RDR2-sensitive |
| AAAGGTTCTGTCTGGGAGCGTGCGG | 0  | 9  | RDR2-sensitive |
| AAAGGTTGGATCGACGTAGAGGCA  | 0  | 32 | RDR2-sensitive |
| AAAGTAATGATGGCTTAGAAACAT  | 57 | 5  | RDR2-resistant |
| AAAGTACTCGGCAAAGAAGGCTTT  | 1  | 18 | RDR2-sensitive |
| AAAGTAGACTGTAAAGGACGGATA  | 0  | 9  | RDR2-sensitive |
| AAAGTAGAGCTACGCTACATGCGG  | 45 | 6  | RDR2-resistant |
| AAAGTAGGATGCAGCACACGACGG  | 0  | 12 | RDR2-sensitive |
| AAAGTAGGGACTAATTGGCTTTAG  | 0  | 10 | RDR2-sensitive |
| AAAGTAGTGGATTGGGCATGTTCCG | 6  | 21 | RDR2-sensitive |
| AAAGTCAGGAGACATCTGAGGCGT  | 1  | 20 | RDR2-sensitive |
| AAAGTCAGTTATCGTCGTTTTGCC  | 63 | 6  | RDR2-resistant |
| AAAGTCATTCTATCTTTAAGTCGG  | 2  | 31 | RDR2-sensitive |
| AAAGTCCAGGACTGCAGGGGCGGT  | 2  | 14 | RDR2-sensitive |
| AAAGTCCGGGCTGTGAGAGGAGGG  | 0  | 14 | RDR2-sensitive |
| AAAGTCGACTTTGCCGAGGGCCGC  | 2  | 21 | RDR2-sensitive |
| AAAGTCGGCATTGCAGCAGATCGG  | 0  | 9  | RDR2-sensitive |
| AAAGTCTGGCCTGTTTTCGCGCGT  | 0  | 17 | RDR2-sensitive |
| AAAGTGACTGCATGGACGGTCCAT  | 0  | 12 | RDR2-sensitive |
| AAAGTGGAACCGGAGGCAGGGCGT  | 0  | 10 | RDR2-sensitive |
| AAAGTGGATCCGGCGTTCTTGAGT  | 20 | 0  | RDR2-resistant |
| AAAGTGTACTTTATGATCTGTGGA  | 0  | 9  | RDR2-sensitive |
| AAAGTTCGGAGAGCCAGGAGACAC  | 0  | 11 | RDR2-sensitive |
| AAAGTTGGCATTGCAGTAGACCGG  | 1  | 15 | RDR2-sensitive |
| AAAGTTTGATATGTCAGCGGCTC   | 31 | 2  | RDR2-resistant |
| AAATAACACGGGCTGAGCTGGCAT  | 0  | 13 | RDR2-sensitive |
| AAATAACTGTAGAATGGACGGTTG  | 0  | 20 | RDR2-sensitive |
| AAATAAGTTGTTATTTTCGTGCGT  | 0  | 27 | RDR2-sensitive |

|                           |     |     |                |
|---------------------------|-----|-----|----------------|
| AAATAATATGGGTCGGGCTAGCAT  | 0   | 10  | RDR2-sensitive |
| AAATAATCACTATTTTCGTCCGGTC | 0   | 9   | RDR2-sensitive |
| AAATAATCTGTATTTTCGTCCGGTC | 0   | 20  | RDR2-sensitive |
| AAATACAATGTTATTTTCGTCCGGC | 2   | 23  | RDR2-sensitive |
| AAATACAGCTTATTTTCGTCCGGCC | 0   | 10  | RDR2-sensitive |
| AAATACATTGTAGTTGTCTCGTCA  | 0   | 10  | RDR2-sensitive |
| AAATACGAAAGTTATTTTCGTCCGG | 0   | 14  | RDR2-sensitive |
| AAATACGGACTCTATCTAAGGCTG  | 0   | 9   | RDR2-sensitive |
| AAATACGGAGTCTGCTGGAAACGG  | 0   | 12  | RDR2-sensitive |
| AAATACGTCGGGTAGGGTACGGAT  | 0   | 31  | RDR2-sensitive |
| AAATACGTGCTGGCAGCTGATGTG  | 0   | 11  | RDR2-sensitive |
| AAATACTCGGCGAATGACGGTCCT  | 0   | 14  | RDR2-sensitive |
| AAATACTGTAGAAGCCGCAGCCGC  | 13  | 231 | RDR2-sensitive |
| AAATACTTCGGACCAGGCTAGCAC  | 0   | 13  | RDR2-sensitive |
| AAATACTTCGGGCTGGGCTAGCAC  | 0   | 21  | RDR2-sensitive |
| AAATAGACTGCTGAGGGTATTAAG  | 51  | 0   | RDR2-resistant |
| AAATAGAGCTATTTTCGACGGTAC  | 0   | 11  | RDR2-sensitive |
| AAATAGGACTTTGCCGAGAGCCGC  | 1   | 13  | RDR2-sensitive |
| AAATAGGCTATTTTCGTCCGGTTTA | 0   | 9   | RDR2-sensitive |
| AAATAGGTTTACGATCGTCACTAT  | 0   | 10  | RDR2-sensitive |
| AAATAGTGTTCCGGATGGCAGCTAG | 0   | 11  | RDR2-sensitive |
| AAATATAATTGTGTGTCGTCTGTAA | 34  | 1   | RDR2-resistant |
| AAATATGACTGCGGAAGATTGTAT  | 1   | 25  | RDR2-sensitive |
| AAATATGATTGTTTAAGTGATTTT  | 25  | 1   | RDR2-resistant |
| AAATATGTCTAGATTGTATCCGGTG | 0   | 27  | RDR2-sensitive |
| AAATATTCGGCATTCTATAGAT    | 164 | 0   | RDR2-resistant |
| AAATATTGGGCTTTTTACCGGTTA  | 23  | 1   | RDR2-resistant |
| AAATATTCGGATCGTGTCTGTGCC  | 0   | 9   | RDR2-sensitive |
| AAATCATGGTCTGTATTTGGCGCA  | 0   | 10  | RDR2-sensitive |
| AAATCGGTACGACTCATGACGGGC  | 1   | 13  | RDR2-sensitive |
| AAATCGGTCTGTATTTAGTCCGGT  | 1   | 30  | RDR2-sensitive |
| AAATCGTGCCTGGACCGGGTCCGGC | 0   | 12  | RDR2-sensitive |
| AAATCGTTCGTCTGACTGGGTAT   | 288 | 54  | RDR2-resistant |
| AAATCTAATTAGGTCGTCTTGTGC  | 0   | 11  | RDR2-sensitive |
| AAATCTCTGACTGCGAAGATCGAC  | 0   | 10  | RDR2-sensitive |
| AAATGAACCCAAGCTGAGGCTCTT  | 0   | 31  | RDR2-sensitive |
| AAATGAACGATGACGGTCTGTCCG  | 0   | 9   | RDR2-sensitive |
| AAATGAACTCGGCCCGATGGCGT   | 0   | 16  | RDR2-sensitive |
| AAATGACGTGAGCTGAAGCCGGGT  | 0   | 10  | RDR2-sensitive |
| AAATGACTCGTATCAACAGGGGCG  | 0   | 9   | RDR2-sensitive |
| AAATGAGACTGTAAATGACGGATA  | 0   | 10  | RDR2-sensitive |
| AAATGATCTACCTGTAGAGATGGC  | 1   | 14  | RDR2-sensitive |
| AAATGCCTCGGTGCTGTTGGGCGC  | 0   | 9   | RDR2-sensitive |
| AAATGCCTGTAGCACTAGCGGCAC  | 0   | 9   | RDR2-sensitive |
| AAATGCGAGGCTGAGGTATATGGC  | 31  | 1   | RDR2-resistant |
| AAATGCGGATGCGGAGTGGGATGG  | 0   | 9   | RDR2-sensitive |
| AAATGCTACTTCATCTTGTCCGGTC | 25  | 0   | RDR2-resistant |
| AAATGCTCCTGCGATTTGGTCCGGT | 2   | 18  | RDR2-sensitive |
| AAATGGAECTCTCGAGAAGACTCT  | 0   | 11  | RDR2-sensitive |

|                            |     |    |                |
|----------------------------|-----|----|----------------|
| AAATGGAAGTGTAAAATAGCGGAT   | 0   | 9  | RDR2-sensitive |
| AAATGGAAGGTGGAGGTTTTAGGT   | 14  | 0  | RDR2-resistant |
| AAATGGACTGGGCTAGCACGGCAC   | 0   | 20 | RDR2-sensitive |
| AAATGGACTGGGCTTGTCCGGCGG   | 0   | 11 | RDR2-sensitive |
| AAATGGATTGTGTCTATCAGGCTG   | 0   | 14 | RDR2-sensitive |
| AAATGGATTTGCAGATTTGATGGT   | 0   | 25 | RDR2-sensitive |
| AAATGGTTCGTGCTTCGGACCGGC   | 1   | 28 | RDR2-sensitive |
| AAATGGTTGTAACGTAGATGGTAA   | 0   | 14 | RDR2-sensitive |
| AAATGTCTGATCGTTTGGAGGGAG   | 42  | 3  | RDR2-resistant |
| AAATGTCTTCTCTAGAAACGGCTC   | 0   | 15 | RDR2-sensitive |
| AAATGTGGCTGTACGGACGCGGAT   | 0   | 12 | RDR2-sensitive |
| AAATGTTGGGCTTTTTACCGTTA    | 55  | 17 | RDR2-resistant |
| AAATGTTTGGACGGCTATAGCTAC   | 0   | 9  | RDR2-sensitive |
| AAATTAGCGTCAGGAGGTCGGCCC   | 34  | 0  | RDR2-resistant |
| AAATTAGTCTCTGTAGAGTGGCAG   | 24  | 0  | RDR2-resistant |
| AAATTAGTGGACGGTGATGGTGAT   | 0   | 14 | RDR2-sensitive |
| AAATTATCTATTTTCGTCGGTTTA   | 0   | 21 | RDR2-sensitive |
| AAATTATCTGATACATTAGATCGT   | 0   | 11 | RDR2-sensitive |
| AAATTATTTGGTTGCGTTGGCTCT   | 20  | 0  | RDR2-resistant |
| AAATTCACTAGTCGGTTGACGGTC   | 0   | 9  | RDR2-sensitive |
| AAATTCGAATGTTATTTTCGTCGG   | 0   | 16 | RDR2-sensitive |
| AAATTCGAAGTGGGACGACATCAT   | 0   | 13 | RDR2-sensitive |
| AAATTGAACTAACGGCATAACTC    | 31  | 4  | RDR2-resistant |
| AAATTGAACTCGGTTGAATTCGGT   | 51  | 2  | RDR2-resistant |
| AAATTGACTTTGTTCTCGGTTCTT   | 143 | 0  | RDR2-resistant |
| AAATTGCGGACTATTTTCGGCGGT   | 0   | 17 | RDR2-sensitive |
| AAATTGGAGGGACGAGAGAGGACG   | 1   | 20 | RDR2-sensitive |
| AAATTGTATTGTTTTATGATCCGG   | 0   | 9  | RDR2-sensitive |
| AAATTGTTAGTCGGTATACATTGC   | 0   | 21 | RDR2-sensitive |
| AAATTGTTGAGTTGCATACTCATT   | 26  | 0  | RDR2-resistant |
| AAATTGTTGCGGATCTATCGGCTT   | 0   | 9  | RDR2-sensitive |
| AAATTTACTTTGTTCGGAGCGAGGTT | 3   | 23 | RDR2-sensitive |
| AAATTTAGAGGACGAGGACGTCAT   | 0   | 40 | RDR2-sensitive |
| AAATTTAGCGGACAGGACGGTTTA   | 1   | 13 | RDR2-sensitive |
| AAATTTAGGGGACGCTGCTGGAGA   | 0   | 13 | RDR2-sensitive |
| AAATTTAGTGGACGAGGACGTGCG   | 0   | 9  | RDR2-sensitive |
| AAATTTATTGGTCGGAAATGGAGC   | 1   | 34 | RDR2-sensitive |
| AAATTTCTGGAGCTGGAGCGGTC    | 0   | 23 | RDR2-sensitive |
| AAATTTCTACTCGTCGGGTTACCC   | 0   | 10 | RDR2-sensitive |
| AAATTTGGACCATTCTCGATTTG    | 17  | 0  | RDR2-resistant |
| AAATTTGGGATTATTCGGATTTTC   | 109 | 5  | RDR2-resistant |
| AAATTTGGTAGAGCAGGTCATTAG   | 20  | 0  | RDR2-resistant |
| AAATTTGTAACCGACGACATA      | 0   | 33 | RDR2-sensitive |
| AAATTTTATTTCACGTTTGGACC    | 0   | 26 | RDR2-sensitive |
| AAATTTTCGGTTCGGTAATTCGGT   | 0   | 20 | RDR2-sensitive |
| AAATTTTGAAATAATCGTTTTGTT   | 15  | 0  | RDR2-resistant |
| AACAAAAGTGAACAGAACGGCTC    | 1   | 23 | RDR2-sensitive |
| AACAAAAGTAGGACAGAACGGCTC   | 0   | 29 | RDR2-sensitive |
| AACAAAAGTGAAGAACGGCTC      | 0   | 11 | RDR2-sensitive |

|                            |     |     |                |
|----------------------------|-----|-----|----------------|
| AACAAAACCTGGGACAGAACGGCTC  | 3   | 86  | RDR2-sensitive |
| AACAAAACCTGGGACAGAACGGTTC  | 0   | 15  | RDR2-sensitive |
| AACAAAACCTGGGATAGAACGGCTC  | 0   | 9   | RDR2-sensitive |
| AACAAGACTGTCGCTGTCGGCGT    | 0   | 18  | RDR2-sensitive |
| AACAAATCTTGGTCGTCCCCTTCT   | 19  | 0   | RDR2-resistant |
| AACAACACTGTAGATCATTTCGG    | 0   | 19  | RDR2-sensitive |
| AACAACCTAATTTGAGGGATCGTC   | 0   | 29  | RDR2-sensitive |
| AACAACCTTATTTGAGGGATCGTC   | 8   | 44  | RDR2-sensitive |
| AACAACGACTGCGGATCGGCTAAA   | 25  | 0   | RDR2-resistant |
| AACAACGGACGCAACGCACGGCTC   | 0   | 10  | RDR2-sensitive |
| AACAACGTACGGGCATACAGCTAG   | 0   | 29  | RDR2-sensitive |
| AACAACCTCCGAATGGGATGCGCGT  | 0   | 9   | RDR2-sensitive |
| AACAACCTGTAGCAAGAACTCGGA   | 0   | 11  | RDR2-sensitive |
| AACAACCTGTGACCAGACGAAGCGC  | 0   | 9   | RDR2-sensitive |
| AACAACCTGTGCTGATTGGATGAC   | 761 | 21  | RDR2-resistant |
| AACAACCTTTCTGTGCGATGGACGCA | 0   | 12  | RDR2-sensitive |
| AACAAGACGGTGCTGAACGTGCGAC  | 0   | 17  | RDR2-sensitive |
| AACAAGCTCTAAGGTGTGTTGGT    | 15  | 0   | RDR2-resistant |
| AACAATAGATTGATTCGGTTGCCT   | 0   | 14  | RDR2-sensitive |
| AACAATATTATGTACGGCTATTGA   | 22  | 0   | RDR2-resistant |
| AACAATCCGGTGACTGTCCGGCCG   | 0   | 23  | RDR2-sensitive |
| AACAATCTCGTCGCGCGGCTTCGC   | 1   | 15  | RDR2-sensitive |
| AACAATCTTATTTGAGGGATCGTC   | 0   | 10  | RDR2-sensitive |
| AACACAAACAGCGGACTTCGTGGC   | 0   | 12  | RDR2-sensitive |
| AACACAAGTGACGAGCAGCTCCGA   | 0   | 10  | RDR2-sensitive |
| AACACAAGTTTGTCTAGTCGTTGG   | 1   | 33  | RDR2-sensitive |
| AACACACGCAGCGAATCTGGGCAT   | 0   | 13  | RDR2-sensitive |
| AACACATGCGTTTCGGTCTAGATGG  | 0   | 11  | RDR2-sensitive |
| AACACATGTTGGATAAAATGGCGT   | 166 | 10  | RDR2-resistant |
| AACACCAGTTTCAACGGTCGTCGT   | 0   | 9   | RDR2-sensitive |
| AACACCGGAGTAGTTTTTGATGGC   | 0   | 30  | RDR2-sensitive |
| AACACCGTTGGATACTGGACGGAT   | 0   | 15  | RDR2-sensitive |
| AACACCGTTGGATATGGAGGGTGC   | 0   | 9   | RDR2-sensitive |
| AACACCGTTGGATGTGGAGGGTGC   | 1   | 65  | RDR2-sensitive |
| AACACCGTTGGATGTGGAGGGTGT   | 0   | 41  | RDR2-sensitive |
| AACACCTTCGGAAGACTGGCACAA   | 0   | 18  | RDR2-sensitive |
| AACACCTTCTGCAGCGGAGACTGT   | 0   | 11  | RDR2-sensitive |
| AACACGCCTGTGAAGCACGACGCC   | 0   | 9   | RDR2-sensitive |
| AACACGCTACGGGCTTAAACGGAT   | 0   | 9   | RDR2-sensitive |
| AACACGCTTGTTTCGGACAACGCAT  | 0   | 55  | RDR2-sensitive |
| AACACGGACCATAGGGGGGCGGG    | 16  | 0   | RDR2-resistant |
| AACACGTGACAGTGGAGTCGGCGC   | 0   | 39  | RDR2-sensitive |
| AACACTCATGTTGGTCTGTGGGGA   | 0   | 12  | RDR2-sensitive |
| AACACTCCTGAACTCGGCTGGTAA   | 0   | 14  | RDR2-sensitive |
| AACACTCGGCAAAGAACACTCGGC   | 12  | 65  | RDR2-sensitive |
| AACACTCGGCAAAGAACGCTCGGC   | 33  | 375 | RDR2-sensitive |
| AACACTCGGCAAAGAAGGCTCGGC   | 8   | 114 | RDR2-sensitive |
| AACACTCGGCAAAGCCTCGGATTC   | 0   | 14  | RDR2-sensitive |
| AACACTCGGCACAGAACGGCACTC   | 0   | 15  | RDR2-sensitive |



|                          |    |    |                |
|--------------------------|----|----|----------------|
| AACACTCTCGTACTGTGCTTAGGC | 9  | 65 | RDR2-sensitive |
| AACACTCTCGTCGCGCGGCTTCGC | 0  | 12 | RDR2-sensitive |
| AACACTCTCGTCGTGCGGCTTCGC | 0  | 9  | RDR2-sensitive |
| AACACTGCTCGGAGGTACTGGCAT | 0  | 26 | RDR2-sensitive |
| AACACTGTAGCCGGCTAACCGTGT | 0  | 14 | RDR2-sensitive |
| AACACTGTAGCTTTAGGGGACCGA | 1  | 28 | RDR2-sensitive |
| AACACTGTAGCTTTAGGGGACGTT | 0  | 10 | RDR2-sensitive |
| AACACTGTAGCTTTAGGGGATCGA | 0  | 9  | RDR2-sensitive |
| AACACTGTATAGCATTTTCGACGG | 0  | 9  | RDR2-sensitive |
| AACACTGTTGGACTGGCCACGGT  | 0  | 12 | RDR2-sensitive |
| AACAGAACCCTAGCAGCGACTCAT | 0  | 30 | RDR2-sensitive |
| AACAGAAGGGCACAACCTGAGCAA | 0  | 10 | RDR2-sensitive |
| AACAGACGTAGACCACATGACCGG | 0  | 10 | RDR2-sensitive |
| AACAGACGTGGGGCAGGTGGCGCA | 1  | 14 | RDR2-sensitive |
| AACAGACTGGTCTGACACGGTCAA | 0  | 9  | RDR2-sensitive |
| AACAGAGATTGGTTTCATTCTGCA | 0  | 10 | RDR2-sensitive |
| AACAGAGCTCATGATCGTCGAGAC | 0  | 10 | RDR2-sensitive |
| AACAGATCAGTTATTTCCAGGTT  | 26 | 0  | RDR2-resistant |
| AACAGATCGGATTCGGATCGGATA | 0  | 9  | RDR2-sensitive |
| AACAGATGACTAGATAACATTGCC | 15 | 0  | RDR2-resistant |
| AACAGATTGATGGGCGGTACGGTA | 18 | 0  | RDR2-resistant |
| AACAGATTGCTGGTCGTGCTGGTC | 0  | 10 | RDR2-sensitive |
| AACAGATTGTTAGAGACAGACGTT | 0  | 13 | RDR2-sensitive |
| AACAGCGTAGACGGTCTGTCCGA  | 0  | 31 | RDR2-sensitive |
| AACAGCTACTGTGAAACCGGCGT  | 2  | 36 | RDR2-sensitive |
| AACAGCTCAGGACCTTGACGACGG | 0  | 31 | RDR2-sensitive |
| AACAGCTGCAACAGTGTGCGCTTG | 1  | 21 | RDR2-sensitive |
| AACAGGACGCTTTCATATATAAT  | 19 | 0  | RDR2-resistant |
| AACAGGACGGCTGAAAGCACACAA | 0  | 41 | RDR2-sensitive |
| AACAGGACTGCAGAAGAATGGGCT | 0  | 14 | RDR2-sensitive |
| AACAGGCAACGTAGCATAGCACTC | 0  | 9  | RDR2-sensitive |
| AACAGGCGTATGAGGCACTGAAGC | 19 | 0  | RDR2-resistant |
| AACAGGCTGTGCGGTGCGCCACCT | 0  | 12 | RDR2-sensitive |
| AACAGGGGACGACATGGGACGGTC | 0  | 10 | RDR2-sensitive |
| AACAGGTACCGCAGGATGAGGCGC | 0  | 10 | RDR2-sensitive |
| AACAGTAAGAACTCTGTTGGTGCC | 0  | 11 | RDR2-sensitive |
| AACAGTACGGATCGGAACGGTATT | 0  | 9  | RDR2-sensitive |
| AACAGTAGAACCGGACATTCGGCC | 0  | 10 | RDR2-sensitive |
| AACAGTAGTCCCGGACGGATTAC  | 1  | 32 | RDR2-sensitive |
| AACAGTCGGAAGGCAGTAGTCGC  | 2  | 14 | RDR2-sensitive |
| AACAGTCGGAGAGGCAGTAGTCAC | 0  | 13 | RDR2-sensitive |
| AACAGTCGGATAGGCAGTAGTCAC | 0  | 15 | RDR2-sensitive |
| AACAGTCGGCTCTCGGCAAAGATG | 0  | 9  | RDR2-sensitive |
| AACAGTCTTTGTTGGCTCGGTACA | 0  | 23 | RDR2-sensitive |
| AACAGTGGGCGTGACGTAATTGGG | 1  | 13 | RDR2-sensitive |
| AACAGTTGTGATTCGGTATGGCTT | 40 | 0  | RDR2-resistant |
| AACATAACTTATTTACGTCGGTC  | 0  | 11 | RDR2-sensitive |
| AACATAGTTTATGTGTAGTTCGGT | 22 | 1  | RDR2-resistant |
| AACATCAACTGTAGCTCGATGGTT | 0  | 12 | RDR2-sensitive |

|                          |    |    |                |
|--------------------------|----|----|----------------|
| AACATCGGAGTAGTTTTGGTGCC  | 0  | 14 | RDR2-sensitive |
| AACATCTCGCTGTGAGCCAGGCTG | 0  | 12 | RDR2-sensitive |
| AACATCTGGATCCAGAACGCGCAC | 0  | 9  | RDR2-sensitive |
| AACATGAACTGTTGCTAATGTCGT | 17 | 0  | RDR2-resistant |
| AACATGACTGCAGAGGATTGTGGT | 0  | 16 | RDR2-sensitive |
| AACATGCCCGTTTATGTGTCCGAC | 0  | 16 | RDR2-sensitive |
| AACATGCTTGTTCCGACGACGCAT | 0  | 12 | RDR2-sensitive |
| AACATGGACGAGCAGACACGACAC | 0  | 20 | RDR2-sensitive |
| AACATGGACGGCGGGGAGGGTCCG | 35 | 1  | RDR2-resistant |
| AACATGTGAGGATTGTGACGCATC | 0  | 19 | RDR2-sensitive |
| AACATTGTAATTGGACTTTCGGTA | 0  | 13 | RDR2-sensitive |
| AACATTGTTGACTGTGAAGCCGGA | 62 | 3  | RDR2-resistant |
| AACCAACCGGGACACGTAGGGCGG | 0  | 10 | RDR2-sensitive |
| AACCAACTTTATATCGGGCGTCCG | 0  | 9  | RDR2-sensitive |
| AACCAAGACGGCTCTAGACGACAT | 0  | 14 | RDR2-sensitive |
| AACCAAGACGGCTCTAGACGACGT | 0  | 9  | RDR2-sensitive |
| AACCAAGCGGCCAGCGCGCTCTGT | 19 | 1  | RDR2-resistant |
| AACCAATCTTGGGCTGCCAACGG  | 0  | 13 | RDR2-sensitive |
| AACCAATGGTTTAGATTGTTGGAT | 0  | 10 | RDR2-sensitive |
| AACCACATTTATCGTGCGGGCTG  | 28 | 5  | RDR2-resistant |
| AACCACGGTCGCGTGCTGACACGG | 0  | 14 | RDR2-sensitive |
| AACCACTCGAGACTGTGTGGGCAG | 5  | 57 | RDR2-sensitive |
| AACCAGAAGGACGACCGAAGACAG | 0  | 14 | RDR2-sensitive |
| AACCAGAAGGACGACCGAAGACTT | 0  | 21 | RDR2-sensitive |
| AACCAGATCGATATCAGGACTCGA | 0  | 11 | RDR2-sensitive |
| AACCAGATTGTAGGACTGGTCGGC | 0  | 9  | RDR2-sensitive |
| AACCAGCGACTGCAGCGAGAGACG | 0  | 9  | RDR2-sensitive |
| AACCAGGACTACGTAGAAGAGGAA | 0  | 9  | RDR2-sensitive |
| AACCAGGCTCAAGAGAACACGCAT | 0  | 41 | RDR2-sensitive |
| AACCAGGCTGTCTAGAGAAGCGAA | 0  | 9  | RDR2-sensitive |
| AACCAGGTCGTGTCCGGCTCGGGC | 0  | 16 | RDR2-sensitive |
| AACCAGGTCGTGTCCGGCTTCCGG | 0  | 34 | RDR2-sensitive |
| AACCAGGTGGACGCTGACGGTA   | 1  | 57 | RDR2-sensitive |
| AACCAGTTGCATGCATAGAGTCTG | 0  | 11 | RDR2-sensitive |
| AACCAGTTTGTAGGGATGGTCGGC | 0  | 14 | RDR2-sensitive |
| AACCAGTTTGTAGGGGTGGTCGGC | 1  | 15 | RDR2-sensitive |
| AACCATAAAGTTTGTAGCACGGGT | 56 | 2  | RDR2-resistant |
| AACCATACTGTAATTCGCGCGGAC | 0  | 14 | RDR2-sensitive |
| AACCATAGGGTATCGGATCGTGGG | 0  | 16 | RDR2-sensitive |
| AACCATAGTTGACTGGAAGACGAC | 0  | 12 | RDR2-sensitive |
| AACCATAGTTGACTGGGAGACGAC | 1  | 96 | RDR2-sensitive |
| AACCATCCTGGTTTGTAGTCCGGC | 0  | 13 | RDR2-sensitive |
| AACCATCGCGGGCTGTACGACGGT | 0  | 13 | RDR2-sensitive |
| AACCATCGGGTATCGGATCGTGGG | 0  | 10 | RDR2-sensitive |
| AACCATCGTCTACTTATACGGTC  | 0  | 42 | RDR2-sensitive |
| AACCATTAGTTCTTTATTGTCCGC | 0  | 24 | RDR2-sensitive |
| AACCATTTAAGATCATGTTCCGTT | 0  | 16 | RDR2-sensitive |
| AACCCAAAGTTGACTGGGAGACGA | 0  | 15 | RDR2-sensitive |
| AACCCAACGGCCTGGTGACGTGGC | 0  | 9  | RDR2-sensitive |

|                             |    |     |                |
|-----------------------------|----|-----|----------------|
| AACCCATCTGGGCTGGGACGCGCA    | 0  | 11  | RDR2-sensitive |
| AACCCCGGCTTGTAGTGTGTGCTT    | 0  | 12  | RDR2-sensitive |
| AACCCGAGAGTCGTCGACATTGGC    | 0  | 11  | RDR2-sensitive |
| AACCCGGACTTTGAGAAGAGGGAT    | 0  | 20  | RDR2-sensitive |
| AACCCGGCACGGTAGAATAAACGG    | 1  | 15  | RDR2-sensitive |
| AACCCGGCACGGTAGAATAAGCGG    | 2  | 331 | RDR2-sensitive |
| AACCCGGCATGGTAGAATAAGCGG    | 0  | 13  | RDR2-sensitive |
| AACCCGGGAGCAGGATGAACGAGC    | 25 | 3   | RDR2-resistant |
| AACCCGGGCTGTGAGAGAAGAGGA    | 0  | 13  | RDR2-sensitive |
| AACCCGGGCTGTGAGAGGAGGGGA    | 2  | 47  | RDR2-sensitive |
| AACCCGTAGACCTGAACTCGACGG    | 0  | 35  | RDR2-sensitive |
| AACCCGTGTCGTGACACGCCCTTCGGC | 0  | 13  | RDR2-sensitive |
| AACCCTAATTCGTGGTGGTCTCGG    | 0  | 10  | RDR2-sensitive |
| AACCCTGCGCCATCGCGGATCGTC    | 0  | 10  | RDR2-sensitive |
| AACCCTGTGATGCGTAGTCGGATC    | 0  | 9   | RDR2-sensitive |
| AACCCTTGTTTCGTTGGGACACCAC   | 0  | 12  | RDR2-sensitive |
| AACCGAACAAGGGGAAGTAGGCAT    | 0  | 19  | RDR2-sensitive |
| AACCGAACGCCTTTAGACGGACAT    | 0  | 15  | RDR2-sensitive |
| AACCGAAGGATAGAGCAGACGAGA    | 0  | 11  | RDR2-sensitive |
| AACCGACACGTAGGGGGCGCTGTA    | 0  | 10  | RDR2-sensitive |
| AACCGACTCAGAACTGGTACGGAC    | 65 | 126 | RDR2-sensitive |
| AACCGACTGGAGCAGGAGCACAAC    | 0  | 15  | RDR2-sensitive |
| AACCGACTGTATCGCAGGCGCATT    | 1  | 15  | RDR2-sensitive |
| AACCGACTGTTGATCCAAGGGCGC    | 0  | 16  | RDR2-sensitive |
| AACCGAGGACGTAGACGCGGCCGT    | 0  | 16  | RDR2-sensitive |
| AACCGATCTGTAGTGGAACAGGCT    | 0  | 15  | RDR2-sensitive |
| AACCGGACCGCCTGTACAGAGGTT    | 0  | 28  | RDR2-sensitive |
| AACCGGACCGGGTCGTGCCTGGAC    | 0  | 9   | RDR2-sensitive |
| AACCGGACGACCCATACTGTTTGG    | 0  | 17  | RDR2-sensitive |
| AACCGGACTGCCGACACACGGCGT    | 4  | 25  | RDR2-sensitive |
| AACCGGATGCAGAAGATGTACGAT    | 29 | 0   | RDR2-resistant |
| AACCGGCTAGTGTAGAGGACACAT    | 0  | 10  | RDR2-sensitive |
| AACCGGGTCGTGCCGTGCTCGGAC    | 1  | 13  | RDR2-sensitive |
| AACCGTAGGTCGCTGAAGGCCGTT    | 0  | 13  | RDR2-sensitive |
| AACCGTCAGGTCGGATCGTGGGCC    | 1  | 18  | RDR2-sensitive |
| AACCGTCCACTCTGTAACAACGGT    | 0  | 51  | RDR2-sensitive |
| AACCGTGACTGTCGGGCCAGGCC     | 0  | 11  | RDR2-sensitive |
| AACCGTGCCGGGCTTAGGCTGCAT    | 0  | 10  | RDR2-sensitive |
| AACCGTGCTGGGCTCAAACAGGCT    | 0  | 10  | RDR2-sensitive |
| AACCGTGATAGGAACATAGGCTG     | 0  | 11  | RDR2-sensitive |
| AACCGTGTCTGATCGTGCCTGGGA    | 0  | 11  | RDR2-sensitive |
| AACCGTTAGGGTTCGACCGTTGGA    | 8  | 69  | RDR2-sensitive |
| AACCGTTCAATTCGATCGTCGCC     | 0  | 27  | RDR2-sensitive |
| AACCGTTGGATCTAGATTGGATGC    | 0  | 15  | RDR2-sensitive |
| AACCGTTGGCTCTCGGCAAAGACT    | 1  | 12  | RDR2-sensitive |
| AACCTAATTGTGGGACTGGGCCGG    | 2  | 31  | RDR2-sensitive |
| AACCTAATTGTGGGCTGGGCCGG     | 5  | 31  | RDR2-sensitive |
| AACCTAATTGTGGGTCTAGGTCGG    | 0  | 9   | RDR2-sensitive |
| AACCTAATTTGAGGGATCGTCCCA    | 5  | 128 | RDR2-sensitive |

|                           |    |    |                |
|---------------------------|----|----|----------------|
| AACCTAATTTGAGGGATCGTCTCA  | 0  | 17 | RDR2-sensitive |
| AACCTACGGTGGCTTAGATCTCGG  | 0  | 10 | RDR2-sensitive |
| AACCTACTCCTTGGACTACGGCGA  | 0  | 42 | RDR2-sensitive |
| AACCTACTTAGGACTTATTCGGTT  | 0  | 9  | RDR2-sensitive |
| AACCTAGACACTGCTGCACGGTAC  | 1  | 21 | RDR2-sensitive |
| AACCTAGCGAGACGGTACTGTCGA  | 0  | 9  | RDR2-sensitive |
| AACCTAGCGGATCGTGCCTAAGTC  | 0  | 16 | RDR2-sensitive |
| AACCTAGGACTCAGCACGGTTCGT  | 0  | 33 | RDR2-sensitive |
| AACCTAGGCTGAGAGAGTGTGCAT  | 0  | 10 | RDR2-sensitive |
| AACCTAGTCGTCAGGAGCAGCAGA  | 24 | 0  | RDR2-resistant |
| AACCTATTGAAAAGTAGTCGGGCC  | 0  | 10 | RDR2-sensitive |
| AACCTCACCAGTCGTCGGAGATAG  | 1  | 16 | RDR2-sensitive |
| AACCTCGCCGGAGAAGACAGCTAT  | 7  | 88 | RDR2-sensitive |
| AACCTCGGGTTGTAGTGTGTGCTT  | 0  | 9  | RDR2-sensitive |
| AACCTCGTGGTACAGATCGTCCGT  | 0  | 10 | RDR2-sensitive |
| AACCTGAACACACAAGAGCGGTGT  | 0  | 25 | RDR2-sensitive |
| AACCTGACCCGGGTGTAGAGATGG  | 0  | 13 | RDR2-sensitive |
| AACCTGACTCTTGGTAGACTGGCT  | 0  | 9  | RDR2-sensitive |
| AACCTGGCTCTGATACCACTGAAG  | 52 | 0  | RDR2-resistant |
| AACCTGTTAGAGGCATGTGGTCCA  | 45 | 0  | RDR2-resistant |
| AACCTTAGGCAAAGTGTGGCACAT  | 0  | 13 | RDR2-sensitive |
| AACCTTATTTAAGGGATCGTCTCA  | 1  | 26 | RDR2-sensitive |
| AACCTTATTTGAGGGATCGTCACA  | 0  | 11 | RDR2-sensitive |
| AACCTTATTTGAGGGATCGTCATA  | 0  | 16 | RDR2-sensitive |
| AACCTTATTTGAGGGATCGTCATG  | 0  | 41 | RDR2-sensitive |
| AACCTTATTTGAGGGATCGTCCAA  | 0  | 13 | RDR2-sensitive |
| AACCTTATTTGAGGGATCGTCCCA  | 0  | 23 | RDR2-sensitive |
| AACCTTATTTGAGGGATCGTCCCG  | 0  | 20 | RDR2-sensitive |
| AACCTTATTTGAGGGATCGTCTTA  | 0  | 37 | RDR2-sensitive |
| AACCTTATTTGAGGGATCGTCTAA  | 0  | 20 | RDR2-sensitive |
| AACCTTATTTGAGGGATCGTCTCA  | 17 | 81 | RDR2-sensitive |
| AACCTTATTTGAGGGATCGTCTCG  | 0  | 14 | RDR2-sensitive |
| AACCTTATTTGAGGGATCGTTCTA  | 0  | 9  | RDR2-sensitive |
| AACCTTCAGGACTGTCACGGGTGT  | 0  | 16 | RDR2-sensitive |
| AACCTTGACGTGGACAGAGGCTGT  | 1  | 12 | RDR2-sensitive |
| AACCTTGCGAGGCAGAACGGACGA  | 0  | 9  | RDR2-sensitive |
| AACCTTGTAGTAAGATTGTCCGGTC | 1  | 12 | RDR2-sensitive |
| AACCTTTGGCATGGTTTGTCCGGTC | 44 | 0  | RDR2-resistant |
| AACCTTTTATATTTTATGTCGGGC  | 0  | 13 | RDR2-sensitive |
| AACGAACCATCTGACGGTGCTATC  | 0  | 9  | RDR2-sensitive |
| AACGAAGGCAGAACGGCAGAACGG  | 0  | 21 | RDR2-sensitive |
| AACGAAGGCAGAACGGCAGGCTAC  | 0  | 10 | RDR2-sensitive |
| AACGAAGGCAGAACGGTAGGCTAC  | 2  | 15 | RDR2-sensitive |
| AACGAATCTTGAGATATTTGGCTT  | 51 | 8  | RDR2-resistant |
| AACGAATTTTATAGAAGCTGGCTG  | 1  | 15 | RDR2-sensitive |
| AACGACAAATTTACTCGTCCGGTCC | 0  | 9  | RDR2-sensitive |
| AACGACAATTTTACTCGTCCGGTCC | 0  | 9  | RDR2-sensitive |
| AACGACACCGTGGAGCCAAGGCAA  | 0  | 28 | RDR2-sensitive |
| AACGACATTCAGAATATTTGGCAA  | 0  | 12 | RDR2-sensitive |

|                           |    |     |                |
|---------------------------|----|-----|----------------|
| AACGACGATAGCTTACCTTGTACC  | 28 | 5   | RDR2-resistant |
| AACGACGGCAGAACGGCAGAACGG  | 0  | 10  | RDR2-sensitive |
| AACGACTAAGGACCCTAGCGACGG  | 0  | 9   | RDR2-sensitive |
| AACGACTCAGGATCCTGACGACGG  | 0  | 9   | RDR2-sensitive |
| AACGACTCTGACGATTTGGCGGCG  | 0  | 21  | RDR2-sensitive |
| AACGACTGAGGACCCTAGCGACGG  | 1  | 48  | RDR2-sensitive |
| AACGACTGATGATCAAACGGCTAA  | 0  | 10  | RDR2-sensitive |
| AACGACTGCGGACCGAGCCAGCAT  | 0  | 9   | RDR2-sensitive |
| AACGACTGTAGCAAATGGTTCGT   | 10 | 88  | RDR2-sensitive |
| AACGACTGTTAGACTAGCCGTCAT  | 0  | 16  | RDR2-sensitive |
| AACGACTGTTGGGCGGAGGCGCAC  | 0  | 13  | RDR2-sensitive |
| AACGACTTTGGCTCTTTGATGGCT  | 0  | 20  | RDR2-sensitive |
| AACGAGAGACTGATATGGCACCAA  | 0  | 16  | RDR2-sensitive |
| AACGAGCCAGCTCGAACTCGGACG  | 0  | 11  | RDR2-sensitive |
| AACGAGCGTCACTGTAGCGTTCGTC | 0  | 12  | RDR2-sensitive |
| AACGAGGATTAGTCGGGACCTTGC  | 1  | 12  | RDR2-sensitive |
| AACGAGGCACGTAGCAGCGACGAC  | 0  | 13  | RDR2-sensitive |
| AACGAGGCATGTGTTGGTCGCGGT  | 4  | 61  | RDR2-sensitive |
| AACGAGTACTGAGAAGCGCGCTGT  | 0  | 24  | RDR2-sensitive |
| AACGAGTGATAGAACTTGGCGGGT  | 52 | 0   | RDR2-resistant |
| AACGAGTGATAGAACTTGGCGGTT  | 87 | 2   | RDR2-resistant |
| AACGAGTGGAGTGATAGAGGACGC  | 0  | 11  | RDR2-sensitive |
| AACGATTACATAGTTGGACATCAT  | 2  | 20  | RDR2-sensitive |
| AACGATTATGGATATGTGGATGGC  | 0  | 10  | RDR2-sensitive |
| AACGATTCGGTAGATTATAATGGC  | 3  | 27  | RDR2-sensitive |
| AACGATTCGGTGGATTATAATGGC  | 2  | 26  | RDR2-sensitive |
| AACGCAACACGACCTCGGCGCCAT  | 0  | 16  | RDR2-sensitive |
| AACGCAAGCAGTAGATCACGGAAC  | 0  | 20  | RDR2-sensitive |
| AACGCACGAACGGACAATGGCGAC  | 0  | 10  | RDR2-sensitive |
| AACGCACGATAGGATACGGACGGT  | 0  | 10  | RDR2-sensitive |
| AACGCACGTAGTGGTCTGGGACAA  | 0  | 15  | RDR2-sensitive |
| AACGCATCGGATCATCCACAGCAT  | 0  | 20  | RDR2-sensitive |
| AACGCATCTGATAGTAGACGAGCG  | 0  | 9   | RDR2-sensitive |
| AACGCCATCGGGCCCAGAAGACAC  | 0  | 9   | RDR2-sensitive |
| AACGCCGGCGCTCGGACGGAAGGC  | 0  | 11  | RDR2-sensitive |
| AACGCGACGGGGCATTGTAAGTGG  | 89 | 3   | RDR2-resistant |
| AACGCGACTCTGTCAGGAACGGAA  | 0  | 43  | RDR2-sensitive |
| AACGCGAGACTGGGGGCGTTCGGGC | 0  | 10  | RDR2-sensitive |
| AACGCGGAACAGGAGATGGAGCGA  | 0  | 9   | RDR2-sensitive |
| AACGCGTCTGAGACTGTTTCGGTGC | 0  | 24  | RDR2-sensitive |
| AACGCGTCTGAGACTGTTTCGGTGT | 3  | 38  | RDR2-sensitive |
| AACGCTAACCCGGCTTGTAGTTGT  | 12 | 57  | RDR2-sensitive |
| AACGCTAGCGTAGGAGATCGGCAC  | 0  | 9   | RDR2-sensitive |
| AACGCTATACTGGACTAGGGGCGT  | 0  | 9   | RDR2-sensitive |
| AACGCTCGGCAAAGAACACTCGGC  | 0  | 9   | RDR2-sensitive |
| AACGCTCGGCGAACTGTACATCGG  | 7  | 141 | RDR2-sensitive |
| AACGCTGATGGAGGATAGACTGGT  | 43 | 4   | RDR2-resistant |
| AACGCTGGCAAGGAACACGGGCGC  | 27 | 0   | RDR2-resistant |
| AACGCTGGTAGATGAGGACGACGA  | 0  | 10  | RDR2-sensitive |

|                            |    |    |                |
|----------------------------|----|----|----------------|
| AACGCTTAGTCCGGTGAACGTCTG   | 0  | 14 | RDR2-sensitive |
| AACGCTTGATGTGACTCGGGCTAA   | 0  | 10 | RDR2-sensitive |
| AACGCTTGAACATCCGACAGCTA    | 0  | 9  | RDR2-sensitive |
| AACGGAACAGAAGTGGAGCGGCTT   | 0  | 19 | RDR2-sensitive |
| AACGGAACGTGTGATGGTTTAAACA  | 63 | 0  | RDR2-resistant |
| AACGGAAGACACCTGTGCACGCAT   | 0  | 13 | RDR2-sensitive |
| AACGGAAGAGGAGTGGAACGGCTC   | 0  | 10 | RDR2-sensitive |
| AACGGACAGAAACGGTCGCGCATT   | 0  | 28 | RDR2-sensitive |
| AACGGACAGAGCCGGGTCGGGCAC   | 0  | 23 | RDR2-sensitive |
| AACGGACAGGGGAGGGCAGAACAG   | 0  | 37 | RDR2-sensitive |
| AACGGACCACAAGCAGGCTTTCCGG  | 0  | 10 | RDR2-sensitive |
| AACGGACCACTATTTTCGTCGGCC   | 0  | 11 | RDR2-sensitive |
| AACGGACCAGCCGGAGGATGGCGC   | 0  | 10 | RDR2-sensitive |
| AACGGACCAGCTGAAGGGTGACGC   | 0  | 45 | RDR2-sensitive |
| AACGGACCCAGGAACGTGCGGATC   | 0  | 12 | RDR2-sensitive |
| AACGGACCGAGCTGAGTCGGGCTC   | 0  | 28 | RDR2-sensitive |
| AACGGACCGGCGTCAACTGTCCAC   | 1  | 19 | RDR2-sensitive |
| AACGGACCGGCGTCAACTGTTTCCAC | 0  | 24 | RDR2-sensitive |
| AACGGACGACGACAACCTCATCAT   | 0  | 10 | RDR2-sensitive |
| AACGGACGTCTCTAGCACTAGCAG   | 0  | 10 | RDR2-sensitive |
| AACGGACTGATCTATTAGAAGGGC   | 22 | 0  | RDR2-resistant |
| AACGGACTTCGGGCTAAACGGGTA   | 0  | 10 | RDR2-sensitive |
| AACGGAGCGTGACTGTGAGAGCGG   | 0  | 18 | RDR2-sensitive |
| AACGGAGGCAGAACGGCAGAACAC   | 0  | 15 | RDR2-sensitive |
| AACGGAGGCGGCTTAGTAGTTCTC   | 0  | 13 | RDR2-sensitive |
| AACGGAGTAGAGCAGAACGGTTCC   | 0  | 10 | RDR2-sensitive |
| AACGGATACGGATACGGATAGTCT   | 0  | 9  | RDR2-sensitive |
| AACGGATCAGATGGTTTGCTTGCA   | 5  | 62 | RDR2-sensitive |
| AACGGATGACGCTGCCGCTCCCAC   | 0  | 10 | RDR2-sensitive |
| AACGGATGGCACTTGTACACGCAT   | 0  | 21 | RDR2-sensitive |
| AACGGATTCGGGATCGGATACGGA   | 0  | 11 | RDR2-sensitive |
| AACGGCAGAACACACTGATGGCAG   | 0  | 49 | RDR2-sensitive |
| AACGGCAGAACAGCAGACTACTCT   | 0  | 12 | RDR2-sensitive |
| AACGGCAGAACGGCAGAACCCAAA   | 0  | 9  | RDR2-sensitive |
| AACGGCAGAACGGCAGAACGCAGG   | 0  | 12 | RDR2-sensitive |
| AACGGCAGAACGGCAGAACGCGTC   | 0  | 14 | RDR2-sensitive |
| AACGGCAGAACGGCAGACTACCCT   | 0  | 17 | RDR2-sensitive |
| AACGGCAGAACGGCAGACTACTCT   | 0  | 31 | RDR2-sensitive |
| AACGGCAGAACGTAAGGAAGGCAT   | 0  | 18 | RDR2-sensitive |
| AACGGCAGAACGTAAGGGAGGCAG   | 0  | 11 | RDR2-sensitive |
| AACGGCAGAAATACGGGTAGGACAG  | 0  | 9  | RDR2-sensitive |
| AACGGCAGCGACTCGGACAAGGAA   | 0  | 9  | RDR2-sensitive |
| AACGGCAGTCAGGAGGACATCATC   | 14 | 0  | RDR2-resistant |
| AACGGCATAGGATTCCCTTCGGGTA  | 0  | 22 | RDR2-sensitive |
| AACGGCATGTACTTAGGGCGCTAG   | 0  | 35 | RDR2-sensitive |
| AACGGCCTTCAGCGACCTACGGTT   | 1  | 30 | RDR2-sensitive |
| AACGGCCTTGTTACGCATACTCAC   | 0  | 19 | RDR2-sensitive |
| AACGGCCTTTAGCGACCTACGGTT   | 0  | 15 | RDR2-sensitive |
| AACGGCGCTTAACTCGGACGTCGG   | 1  | 24 | RDR2-sensitive |

|                           |     |    |                |
|---------------------------|-----|----|----------------|
| AACGGCTAACTCGGTCTTCGACGG  | 0   | 13 | RDR2-sensitive |
| AACGGCTACTGTTTTCGGCGGCGC  | 0   | 12 | RDR2-sensitive |
| AACGGCTAGAAGGGGGCACCGGAC  | 0   | 9  | RDR2-sensitive |
| AACGGCTCAGAGTCCAGACGATGT  | 0   | 15 | RDR2-sensitive |
| AACGGCTCTGAATCTGCAACGGTC  | 0   | 12 | RDR2-sensitive |
| AACGGCTCTGCCTAGCTCCGACGG  | 0   | 16 | RDR2-sensitive |
| AACGGCTCTGGCTCCTTGATGGCT  | 0   | 15 | RDR2-sensitive |
| AACGGCTCTGGCTCTTTGATGGCT  | 0   | 41 | RDR2-sensitive |
| AACGGCTCTGTCTCTTTGATGGCT  | 0   | 18 | RDR2-sensitive |
| AACGGCTGCAATTTTAGACGGTGA  | 0   | 9  | RDR2-sensitive |
| AACGGCTGCAGACAGCGAGACCGA  | 0   | 12 | RDR2-sensitive |
| AACGGCTGGCACTCGGCAAAGAGG  | 2   | 14 | RDR2-sensitive |
| AACGGCTGGTCTCGGTAACCTTGA  | 117 | 11 | RDR2-resistant |
| AACGGCTTGGACGGAACACGGGGC  | 0   | 13 | RDR2-sensitive |
| AACGGCTTTCTACGCTACCGTCGG  | 0   | 9  | RDR2-sensitive |
| AACGGCTTTGTAGGAAATTGTCGG  | 0   | 14 | RDR2-sensitive |
| AACGGGAAAGTCGGAAACGGATAA  | 0   | 13 | RDR2-sensitive |
| AACGGGAACGAGAATGTTGGACGG  | 0   | 21 | RDR2-sensitive |
| AACGGGACTAACCGAACAAAGGCAT | 0   | 13 | RDR2-sensitive |
| AACGGGCAACGGATGAGGTTACTT  | 19  | 1  | RDR2-resistant |
| AACGGGCAGTGGAAGATGATGTGC  | 0   | 9  | RDR2-sensitive |
| AACGGGCCGGCGTCAACTGTCCAC  | 4   | 56 | RDR2-sensitive |
| AACGGGCCTTGCCTGGGTTCGCGGC | 0   | 11 | RDR2-sensitive |
| AACGGGCGGATACGGACGGATAGT  | 0   | 31 | RDR2-sensitive |
| AACGGGCGGCGTGTGAATCCTTT   | 36  | 2  | RDR2-resistant |
| AACGGGCTGAATAGTGTGCACGAG  | 0   | 16 | RDR2-sensitive |
| AACGGGCTGGACCGACACGGCTAC  | 0   | 10 | RDR2-sensitive |
| AACGGGCTTAGAGCTAAACGGGCC  | 0   | 15 | RDR2-sensitive |
| AACGGGCTTAGAGGTAAACGGGCC  | 2   | 41 | RDR2-sensitive |
| AACGGGCTTAGAGGTAAACGGGTC  | 0   | 26 | RDR2-sensitive |
| AACGGGGGTGAACAATGGCGACAA  | 0   | 9  | RDR2-sensitive |
| AACGGGTATGGGTGAAGGCGGAAC  | 0   | 12 | RDR2-sensitive |
| AACGGGTATGTGTGAAGGCGGAAC  | 0   | 9  | RDR2-sensitive |
| AACGGGTCGGATTTCGGATCGGATA | 0   | 13 | RDR2-sensitive |
| AACGGGTCGGATTTCGGTTCGGGTA | 0   | 9  | RDR2-sensitive |
| AACGGGTCTCTGTGGAGAACGGGA  | 2   | 39 | RDR2-sensitive |
| AACGGGTCTGCGGCAATGTATCAT  | 0   | 24 | RDR2-sensitive |
| AACGGGTTACTGTTATTGATCGGC  | 199 | 27 | RDR2-resistant |
| AACGGGTTGATCGTGCCCCGGAC   | 0   | 13 | RDR2-sensitive |
| AACGGGTTGGTCTGTTACGGTCAT  | 0   | 14 | RDR2-sensitive |
| AACGGTAATTTTACTCGTCCGGTCC | 0   | 10 | RDR2-sensitive |
| AACGGTAGAATGGACGGCTGAGAT  | 0   | 32 | RDR2-sensitive |
| AACGGTAGCTCTGATGACGACTGT  | 0   | 16 | RDR2-sensitive |
| AACGGTCACCTGCTCTGACAGCGG  | 7   | 46 | RDR2-sensitive |
| AACGGTCCGTAATGAACAGCGGTG  | 0   | 16 | RDR2-sensitive |
| AACGGTCCTGACAGTCATGGACGG  | 0   | 18 | RDR2-sensitive |
| AACGGTCGACTCTGACGGATGAAC  | 0   | 9  | RDR2-sensitive |
| AACGGTCGACTGCAACGCATTA    | 5   | 34 | RDR2-sensitive |
| AACGGTCGACTGCAACGCATTTAA  | 2   | 33 | RDR2-sensitive |

|                          |    |     |                |
|--------------------------|----|-----|----------------|
| AACGGTCGACTGCAACGGCGCCTG | 0  | 36  | RDR2-sensitive |
| AACGGTCGACTGCTACAGACCCCA | 0  | 9   | RDR2-sensitive |
| AACGGTCGACTGCTACAGACGCCA | 0  | 19  | RDR2-sensitive |
| AACGGTCGACTGCTACAGGCGCCA | 7  | 55  | RDR2-sensitive |
| AACGGTCGAGATTGACGGCAGAAC | 0  | 9   | RDR2-sensitive |
| AACGGTCGAAACGGTATTTATTC  | 1  | 14  | RDR2-sensitive |
| AACGGTCGGCTGACGTGGCGTGCA | 1  | 16  | RDR2-sensitive |
| AACGGTCGGTCCAGCATAGCTACC | 0  | 54  | RDR2-sensitive |
| AACGGTCGGTCCGGCACAACCCGT | 0  | 12  | RDR2-sensitive |
| AACGGTCGGTTGGTCGCTACAAGT | 1  | 12  | RDR2-sensitive |
| AACGGTCGTCAGCTGCCGTGGCT  | 0  | 13  | RDR2-sensitive |
| AACGGTCGTCATCTATAGACGGTT | 0  | 17  | RDR2-sensitive |
| AACGGTCTATTTAGTAGGGCGGTA | 0  | 9   | RDR2-sensitive |
| AACGGTCTCGTAGACAGCCGTCGG | 0  | 23  | RDR2-sensitive |
| AACGGTCTCTAGCCGTCGGACATA | 0  | 9   | RDR2-sensitive |
| AACGGTCTGTGCTCTGGGCCGGAT | 1  | 33  | RDR2-sensitive |
| AACGGTGGCTGGAGCGGCTGGGAC | 0  | 14  | RDR2-sensitive |
| AACGGTTAAAGTGCATGCTCAATA | 17 | 1   | RDR2-resistant |
| AACGGTTAGACTGTTGCTGACGGC | 0  | 9   | RDR2-sensitive |
| AACGGTTCAGATCGTTGGATAACC | 0  | 16  | RDR2-sensitive |
| AACGGTTCAGATCGTTGGATAACT | 0  | 14  | RDR2-sensitive |
| AACGGTTCAGATCGTTGGATAATC | 0  | 14  | RDR2-sensitive |
| AACGGTTCGCGCTCTGGACCGGAC | 0  | 28  | RDR2-sensitive |
| AACGGTTGACTGCATGTGCTACGC | 13 | 36  | RDR2-sensitive |
| AACGGTTGGTCTGATAGTCGTCGG | 0  | 14  | RDR2-sensitive |
| AACGGTTGTAGAGCGAGTCGGCAG | 0  | 10  | RDR2-sensitive |
| AACGGTTGTCAACTGTAGATGGCT | 0  | 101 | RDR2-sensitive |
| AACGGTTTACGTTTGACTACTGGC | 0  | 9   | RDR2-sensitive |
| AACGGTTTAGATTGTTGGATAACA | 0  | 9   | RDR2-sensitive |
| AACGTACACGGCACCGCTGAGTCT | 0  | 9   | RDR2-sensitive |
| AACGTACGGGCATACAGCTAGTTA | 0  | 9   | RDR2-sensitive |
| AACGTACTGAACCGGTGTGTCATT | 0  | 13  | RDR2-sensitive |
| AACGTAGAACTCGACCTCGGGCGT | 0  | 10  | RDR2-sensitive |
| AACGTAGACTGTGGTGCACGGTTC | 0  | 21  | RDR2-sensitive |
| AACGTAGGCCTCTGAGCTGGACGA | 0  | 10  | RDR2-sensitive |
| AACGTATAGGACACTCTTCGGCTC | 0  | 10  | RDR2-sensitive |
| AACGTCAAATGTAGTTAGCGGAG  | 14 | 0   | RDR2-resistant |
| AACGTCAGAAGCGGCTCTGTGCCA | 0  | 26  | RDR2-sensitive |
| AACGTCATATCGGATTAAGGTCGG | 0  | 12  | RDR2-sensitive |
| AACGTCCCAGTCGGAGGGTGGCGC | 0  | 30  | RDR2-sensitive |
| AACGTCCGGAGTGTGTGATGGCTT | 2  | 31  | RDR2-sensitive |
| AACGTCCGGTAAATGATTCGGTAT | 0  | 22  | RDR2-sensitive |
| AACGTCTCCCGTCTGACCGAGGCT | 0  | 9   | RDR2-sensitive |
| AACGTCTGTAGGTATGTCGGCGGG | 0  | 11  | RDR2-sensitive |
| AACGTGACCTGTAGATGAGGTCTA | 0  | 9   | RDR2-sensitive |
| AACGTGAGCTGCATGAGAGGACGT | 0  | 32  | RDR2-sensitive |
| AACGTGAGGTGTAGAGGCGCGCGC | 0  | 12  | RDR2-sensitive |
| AACGTGGAAGTGTGTCAGCAA    | 0  | 10  | RDR2-sensitive |
| AACGTGGAAGTAGGCAAGTGTAC  | 0  | 28  | RDR2-sensitive |



|                           |    |    |                |
|---------------------------|----|----|----------------|
| AACGTGGAGGTAGGCAAGTGTTAT  | 0  | 14 | RDR2-sensitive |
| AACGTGGGGCTGAGAGGCGGCATG  | 0  | 9  | RDR2-sensitive |
| AACGTGGGTGATAGAACGGACGGT  | 1  | 20 | RDR2-sensitive |
| AACGTGTACCGACTGTTGCGGTGT  | 1  | 15 | RDR2-sensitive |
| AACGTGTCGCTTAGGACGTCCGGA  | 0  | 16 | RDR2-sensitive |
| AACGTGTCGTGCTGGTCCGGCTAT  | 0  | 30 | RDR2-sensitive |
| AACGTGTCTGAGACTGTTGCGGTGT | 0  | 10 | RDR2-sensitive |
| AACGTGTGACTGTTATGAAGGTAT  | 0  | 53 | RDR2-sensitive |
| AACGTGTGTCTGCACGTGTCGGGC  | 0  | 50 | RDR2-sensitive |
| AACGTTAGTGACAGGACGACGGGA  | 0  | 13 | RDR2-sensitive |
| AACGTTGACGGCTGTCCGCGCGT   | 0  | 9  | RDR2-sensitive |
| AACGTTGAGAGTGTGTGATGGCTT  | 0  | 11 | RDR2-sensitive |
| AACGTTGCGATCGGGGAGACGCAT  | 0  | 13 | RDR2-sensitive |
| AACGTTGACACTGCGGACGGTGAG  | 1  | 14 | RDR2-sensitive |
| AACGTTGAGCTGGTGTGTTGAGGTT | 0  | 9  | RDR2-sensitive |
| AACGTTGCTGTAGCGAGTAGAGGA  | 0  | 35 | RDR2-sensitive |
| AACGTTGGCAGCAGTCGGACATAA  | 0  | 10 | RDR2-sensitive |
| AACGTTGGCTCTTGACGGACATGT  | 0  | 25 | RDR2-sensitive |
| AACGTTGGGACTGTCCGGGCGAGC  | 0  | 10 | RDR2-sensitive |
| AACGTTGGGCTGAGAGCAGGCATG  | 0  | 10 | RDR2-sensitive |
| AACGTTGGTTGAATTTGAGACGAC  | 0  | 9  | RDR2-sensitive |
| AACGTTGTACGGCGTGGTAGACGG  | 3  | 16 | RDR2-sensitive |
| AACGTTTCGGACGTACGTGTGGAT  | 0  | 12 | RDR2-sensitive |
| AACGTTTGTTGGTTGCTCGGTAC   | 0  | 17 | RDR2-sensitive |
| AACGTTTGTTGGTTGCTGGATAC   | 0  | 16 | RDR2-sensitive |
| AACGTTTGTTGGTTGTTCCGGTAC  | 0  | 14 | RDR2-sensitive |
| AACTAAACGTTATCTGCTGGACC   | 1  | 17 | RDR2-sensitive |
| AACTAAATTTTGTAGTGGCTTGGA  | 30 | 0  | RDR2-resistant |
| AACTAAGCTACCACCTCGTCGTTT  | 24 | 0  | RDR2-resistant |
| AACTACAACGTTATCTGGTGGACC  | 0  | 9  | RDR2-sensitive |
| AACTACACTTATGTGATCTTAGGG  | 0  | 11 | RDR2-sensitive |
| AACTACATTTATGTGATCTTAGGG  | 0  | 20 | RDR2-sensitive |
| AACTACTGGAGAACACGCCGGCAT  | 0  | 11 | RDR2-sensitive |
| AACTAGAACTACGCTACATCTACT  | 1  | 17 | RDR2-sensitive |
| AACTAGAGTGACGGGTACCCTGGA  | 0  | 9  | RDR2-sensitive |
| AACTAGCCGGGCAGAAATGACAGA  | 0  | 21 | RDR2-sensitive |
| AACTAGGGTGGACTCTTCGATGGC  | 1  | 17 | RDR2-sensitive |
| AACTAGTCGTTGGACCCAGACGGT  | 0  | 11 | RDR2-sensitive |
| AACTATAGACGGCTGCTGACGGTC  | 0  | 13 | RDR2-sensitive |
| AACTATATCGTCGACTTATGGTGT  | 0  | 10 | RDR2-sensitive |
| AACTATGCGACTGTCAGAAGGTGA  | 2  | 22 | RDR2-sensitive |
| AACTATGGTTGCTGGATCGTTGTC  | 1  | 17 | RDR2-sensitive |
| AACTATGTCGGAGTAGGTATGCAT  | 0  | 9  | RDR2-sensitive |
| AACTCAGCAGCCGTCGGTCGTCGC  | 0  | 11 | RDR2-sensitive |
| AACTCATCGGATACGGGACGGATA  | 0  | 19 | RDR2-sensitive |
| AACTCATCGGCTACAAATGGGCAT  | 0  | 30 | RDR2-sensitive |
| AACTCATGTTGGATTGTGATGGTG  | 1  | 39 | RDR2-sensitive |
| AACTCCATCTGTTGCTTCTGAGGC  | 0  | 9  | RDR2-sensitive |
| AACTCCAATCTGTCGGGCACCAT   | 0  | 11 | RDR2-sensitive |

|                           |     |     |                |
|---------------------------|-----|-----|----------------|
| AACTCCCGCCGAAGACTGCTTCTT  | 0   | 13  | RDR2-sensitive |
| AACTCCCGTCGGCTGCTAGTGGGC  | 0   | 9   | RDR2-sensitive |
| AACTCGACTGGATTGGTACGGCTC  | 0   | 12  | RDR2-sensitive |
| AACTCGCAGGCTTAGACGACCTAA  | 0   | 11  | RDR2-sensitive |
| AACTCGCTCGACTCGGCTCGTTAG  | 0   | 19  | RDR2-sensitive |
| AACTCGCTCGACTCGGCTTGTTAG  | 0   | 9   | RDR2-sensitive |
| AACTCGGAGGCATCACGTAGGGAC  | 0   | 12  | RDR2-sensitive |
| AACTCGGATCTGTGACGCACGGCC  | 0   | 9   | RDR2-sensitive |
| AACTCGGCTCGACTCGGACCGGCT  | 0   | 11  | RDR2-sensitive |
| AACTCGGCTCGGCTCGAAGCGGCT  | 91  | 0   | RDR2-resistant |
| AACTCGGCTCGGCTCGGATCGGCT  | 0   | 17  | RDR2-sensitive |
| AACTCGGCTTAACCTCAGATCGGCT | 0   | 10  | RDR2-sensitive |
| AACTCGGGTGTCTGTCTGATGGCAC | 0   | 17  | RDR2-sensitive |
| AACTCGGTCAGTCGGTGCGGCGAT  | 7   | 29  | RDR2-sensitive |
| AACTCGGTCTCGGACGTCCGGCCT  | 0   | 16  | RDR2-sensitive |
| AACTCGGTCTTCGACGGTCATCTC  | 0   | 10  | RDR2-sensitive |
| AACTCGTCGGTTGGATTGAGGCAT  | 0   | 9   | RDR2-sensitive |
| AACTCTAAACTCGTCGGTTGGCAT  | 0   | 9   | RDR2-sensitive |
| AACTCTAAGCTCGTCGGTTGGCAT  | 0   | 34  | RDR2-sensitive |
| AACTCTACATCGTCTAGTGGCATT  | 0   | 11  | RDR2-sensitive |
| AACTCTACGTCGTCTGGAGACGTC  | 2   | 16  | RDR2-sensitive |
| AACTCTATCAGACAGACTCAGGCT  | 0   | 13  | RDR2-sensitive |
| AACTCTATCATCAGCTTGGGACAG  | 14  | 0   | RDR2-resistant |
| AACTCTCAGCAGGTACGACGGACA  | 0   | 61  | RDR2-sensitive |
| AACTCTCCCGTTGCAGTGGACATG  | 63  | 0   | RDR2-resistant |
| AACTCTCGTAGACGTGCTGGTATT  | 0   | 19  | RDR2-sensitive |
| AACTCTCTCTGCAGGATGACTCTC  | 178 | 5   | RDR2-resistant |
| AACTCTCTGTAGCGGTTCCGACGG  | 0   | 17  | RDR2-sensitive |
| AACTCTCTTGATCGTAACTCGGAT  | 28  | 4   | RDR2-resistant |
| AACTCTGACACTGTTGCACGGTAC  | 0   | 10  | RDR2-sensitive |
| AACTCTGCAGGTAGAGCTGTACGG  | 0   | 46  | RDR2-sensitive |
| AACTCTGCCTCGCACTGTGACTGC  | 0   | 10  | RDR2-sensitive |
| AACTCTGTAGAGAGCCGCGGGCAT  | 0   | 18  | RDR2-sensitive |
| AACTCTGTAGGTGGCGATGTCTAT  | 0   | 11  | RDR2-sensitive |
| AACTGAACGTAGGACATTCGGTCT  | 0   | 11  | RDR2-sensitive |
| AACTGAACTGAAGAACGGAATGCC  | 0   | 10  | RDR2-sensitive |
| AACTGACAAGTTCCTGATGTGCCT  | 14  | 0   | RDR2-resistant |
| AACTGACACAGGCGGAACCTGACAC | 2   | 49  | RDR2-sensitive |
| AACTGACACTGCAAGCAGCTGGAT  | 0   | 12  | RDR2-sensitive |
| AACTGACGGACTCGGAACGGCGGA  | 0   | 17  | RDR2-sensitive |
| AACTGACTCTGCTCATGCGTGGAC  | 0   | 14  | RDR2-sensitive |
| AACTGAGGCGAGGACCATCATTAT  | 0   | 12  | RDR2-sensitive |
| AACTGAGGCTCTGATACCAGATGA  | 9   | 37  | RDR2-sensitive |
| AACTGAGGCTTTGATACCAGATGA  | 28  | 258 | RDR2-sensitive |
| AACTGAGTAGAACTGACGGTCCAT  | 0   | 33  | RDR2-sensitive |
| AACTGATGTAGCTTTGTTGTCGGT  | 0   | 18  | RDR2-sensitive |
| AACTGCACCGTTGAGTTGTGGACA  | 0   | 153 | RDR2-sensitive |
| AACTGCCGCTGTAGACAGAAGATG  | 0   | 45  | RDR2-sensitive |
| AACTGCCTCTGAACCCTGTGCGGT  | 37  | 4   | RDR2-resistant |

|                           |    |     |                |
|---------------------------|----|-----|----------------|
| AACTGCGACTGGACACGACGTGGC  | 0  | 9   | RDR2-sensitive |
| AACTGCTAATGTAGATGTCGGCGT  | 0  | 9   | RDR2-sensitive |
| AACTGCTAGGTTTCGCGACGGCGGC | 23 | 0   | RDR2-resistant |
| AACTGCTGGGGACGGATGGAACAC  | 0  | 19  | RDR2-sensitive |
| AACTGCTGTGCTGTATGACGGATC  | 0  | 23  | RDR2-sensitive |
| AACTGGACAGATGGCGTGGACACT  | 22 | 0   | RDR2-resistant |
| AACTGGACCAAGCCTAAATGGTTG  | 0  | 17  | RDR2-sensitive |
| AACTGGACCATGCCAGGCTCGGAC  | 0  | 11  | RDR2-sensitive |
| AACTGGAGGGACAAGAGAGGACGC  | 0  | 12  | RDR2-sensitive |
| AACTGGATCCGTCGCTTAGGGCAT  | 0  | 13  | RDR2-sensitive |
| AACTGGATTCGGGACCGGATACGG  | 1  | 25  | RDR2-sensitive |
| AACTGGCTCGAACAGGCTGGATGC  | 0  | 12  | RDR2-sensitive |
| AACTGGCTCTGTGCACGCGTGGAC  | 0  | 10  | RDR2-sensitive |
| AACTGGGACAGAACGGCTCCGTTT  | 0  | 29  | RDR2-sensitive |
| AACTGGGGTGAACCTCTTCGATGGC | 0  | 14  | RDR2-sensitive |
| AACTGGTCTTAGGGTTCGTCTGTGC | 31 | 0   | RDR2-resistant |
| AACTGTAAAATGGACGGTTGGATG  | 0  | 13  | RDR2-sensitive |
| AACTGTAATATGGACGGTTGGATG  | 2  | 45  | RDR2-sensitive |
| AACTGTACATCGGCAACAGCCTCT  | 1  | 19  | RDR2-sensitive |
| AACTGTACCGATGACTGCACATGT  | 0  | 15  | RDR2-sensitive |
| AACTGTACTGTTACTGACGGCCGC  | 0  | 12  | RDR2-sensitive |
| AACTGTAGAAGGCTTTTTACTAGG  | 50 | 2   | RDR2-resistant |
| AACTGTAGAAGGCTTTTTACTTGG  | 90 | 24  | RDR2-resistant |
| AACTGTAGAATGGACGGTTGGATG  | 0  | 22  | RDR2-sensitive |
| AACTGTAGAATGTACGGTTAGATG  | 0  | 14  | RDR2-sensitive |
| AACTGTAGACGATACGGTACTGT   | 0  | 16  | RDR2-sensitive |
| AACTGTAGATAGGCCTAATGACTT  | 0  | 11  | RDR2-sensitive |
| AACTGTAGCCTTTATTGCAGAGTG  | 0  | 9   | RDR2-sensitive |
| AACTGTAGCGCGTAGGGGGCTCTC  | 0  | 13  | RDR2-sensitive |
| AACTGTAGGATCAACGGTGGGATG  | 0  | 14  | RDR2-sensitive |
| AACTGTAGGTCGCTGAAGACGCAT  | 0  | 13  | RDR2-sensitive |
| AACTGTAGGTGGGCCTAATGACTT  | 2  | 27  | RDR2-sensitive |
| AACTGTAGGTGGGCCTAATTACTT  | 2  | 29  | RDR2-sensitive |
| AACTGTAGTCCCAGGCGAATTCAC  | 2  | 15  | RDR2-sensitive |
| AACTGTAGTCTTTATTGCAGAGTG  | 0  | 18  | RDR2-sensitive |
| AACTGTAGTCTTTGCCCGGCCAC   | 2  | 21  | RDR2-sensitive |
| AACTGTAGTTCCGGACGGATTCAC  | 0  | 14  | RDR2-sensitive |
| AACTGTCATGTAGTGTAGTGGTAT  | 23 | 0   | RDR2-resistant |
| AACTGTCCACTCTGCAACGGCCCA  | 0  | 11  | RDR2-sensitive |
| AACTGTCCCAATCTGGCGGGCTG   | 2  | 39  | RDR2-sensitive |
| AACTGTCCTAATCTGACGCGGCTG  | 0  | 33  | RDR2-sensitive |
| AACTGTCTGAGACGATACGGACGC  | 0  | 12  | RDR2-sensitive |
| AACTGTGACTGTGGCAGACTGGCT  | 10 | 285 | RDR2-sensitive |
| AACTGTGACTGTTGCAGACTGGCT  | 1  | 74  | RDR2-sensitive |
| AACTGTGAGACAAAGTTGGCCATT  | 15 | 0   | RDR2-resistant |
| AACTGTGATTGTAGCAGACCGGCT  | 0  | 9   | RDR2-sensitive |
| AACTGTGCCAAGCCTGGGCCGCGT  | 0  | 9   | RDR2-sensitive |
| AACTGTGCTGGACCTAGATCGCGT  | 0  | 12  | RDR2-sensitive |
| AACTGTGGCGCGGCGTGAGGACAT  | 0  | 19  | RDR2-sensitive |

|                           |     |    |                |
|---------------------------|-----|----|----------------|
| AACTGTGGTGTGGTTATAGATGAA  | 17  | 0  | RDR2-resistant |
| AACTGTGTGAAATCGAATGGTGC   | 16  | 0  | RDR2-resistant |
| AACTGTTAGATGTGCATCGGTCGT  | 0   | 25 | RDR2-sensitive |
| AACTGTTGTCGGCTCGATCGGTTT  | 0   | 12 | RDR2-sensitive |
| AACTTAAGGGCTATTGACGTCGAC  | 138 | 13 | RDR2-resistant |
| AACTTATCGAGCGGATCGACGTCA  | 0   | 19 | RDR2-sensitive |
| AACTTATCGTATTAGAAACGTCCG  | 0   | 11 | RDR2-sensitive |
| AACTTATGATGTTGGATATTAATT  | 16  | 0  | RDR2-resistant |
| AACTTATGGTTGGTCGCTATAGAT  | 3   | 95 | RDR2-sensitive |
| AACTTATGTAGAAATATGTGGTGT  | 0   | 9  | RDR2-sensitive |
| AACTTATGTTGGTCTGTGAGGATA  | 0   | 12 | RDR2-sensitive |
| AACTTCACTGACGTTGGATGGCTG  | 50  | 11 | RDR2-resistant |
| AACTTCAGGCGTCAGGAAGGAGGC  | 0   | 11 | RDR2-sensitive |
| AACTTCCGTTGTAGTCTAGTTGGT  | 76  | 0  | RDR2-resistant |
| AACTTCGACTGTAATATATGGTGT  | 0   | 10 | RDR2-sensitive |
| AACTTCGATCGGAGAACGGTCCAT  | 0   | 30 | RDR2-sensitive |
| AACTTCGGCAGACTCTTTCAGAAG  | 0   | 11 | RDR2-sensitive |
| AACTTCTGGGACTGCCTTGACGGT  | 0   | 16 | RDR2-sensitive |
| AACTTGACGGAGCCTCGGACGCTA  | 57  | 5  | RDR2-resistant |
| AACTTGGACTTTATTGGACGCGCC  | 0   | 9  | RDR2-sensitive |
| AACTTGGGCAGAACGCACGGGCAC  | 1   | 17 | RDR2-sensitive |
| AACTTGTAGGACGATTTTCGGCTC  | 0   | 13 | RDR2-sensitive |
| AACTTGTGACTTGATGGCTGTCCT  | 18  | 1  | RDR2-resistant |
| AACTTGTGCTGATTGGATGACTTG  | 65  | 7  | RDR2-resistant |
| AACTTGTGGGTACTGTGTCCGCGG  | 0   | 14 | RDR2-sensitive |
| AACTTTCAGTGGGACATTCGACGT  | 30  | 3  | RDR2-resistant |
| AACTTTCCTGTTTTATTTCGGACCA | 42  | 0  | RDR2-resistant |
| AACTTTGACGTGGACAGAGGCTGT  | 0   | 11 | RDR2-sensitive |
| AACTTTGACTGTGGCAGATCGGCT  | 0   | 18 | RDR2-sensitive |
| AACTTTGATTAGCCGGAACGATTC  | 0   | 18 | RDR2-sensitive |
| AACTTTGCGTTGCTAGATCGTTGT  | 0   | 20 | RDR2-sensitive |
| AACTTTGGGTTGCTGGATCGTTGT  | 5   | 26 | RDR2-sensitive |
| AACTTTTGCATGAGCCAGAGCCGA  | 0   | 10 | RDR2-sensitive |
| AACTTTTTGTAGTGTTGATCTCGG  | 0   | 24 | RDR2-sensitive |
| AAGAAAACCTTTGAGAGATTTTGGC | 18  | 0  | RDR2-resistant |
| AAGAAAATCGTCGACTGACGTCA   | 0   | 10 | RDR2-sensitive |
| AAGAAATGGACAAGGGCGTGCCAC  | 4   | 18 | RDR2-sensitive |
| AAGAACACGTCTGATTGGGTGGCG  | 0   | 18 | RDR2-sensitive |
| AAGAACCAAGTAGAACGGAGCCGT  | 0   | 10 | RDR2-sensitive |
| AAGAACCAAGTAGAATGGAGCCGT  | 0   | 9  | RDR2-sensitive |
| AAGAACGTCGCTGACTGAGGCATT  | 0   | 13 | RDR2-sensitive |
| AAGAACTATCTGACCTGGGCTGAC  | 0   | 16 | RDR2-sensitive |
| AAGAACTCGAGGAATTTTCAGGCAT | 42  | 9  | RDR2-resistant |
| AAGAACTCTGTTGGTGGCTGAACT  | 116 | 6  | RDR2-resistant |
| AAGAACTTGGTCTGCTAGATGACG  | 0   | 11 | RDR2-sensitive |
| AAGAAGACGCATGCAACCGAACAT  | 0   | 9  | RDR2-sensitive |
| AAGAAGACGGGCGGCTGAACTAGC  | 2   | 21 | RDR2-sensitive |
| AAGAAGCAGGAGCTGGAGCTTTGC  | 0   | 9  | RDR2-sensitive |
| AAGAAGCTGGTGCCCATGGGGTGA  | 39  | 1  | RDR2-resistant |

|                           |    |     |                |
|---------------------------|----|-----|----------------|
| AAGAAGGACTGTGCGGCCATCCAC  | 0  | 13  | RDR2-sensitive |
| AAGAAGGCTCGGCAAACAGTACAT  | 1  | 17  | RDR2-sensitive |
| AAGAAGGCTTAGTGACGTGCTTGT  | 0  | 10  | RDR2-sensitive |
| AAGAATAAACTCTGATAGTCTGAT  | 55 | 0   | RDR2-resistant |
| AAGAATGATAATGATCGAGCGATG  | 17 | 0   | RDR2-resistant |
| AAGACACACGCTAGGATCTCGGAG  | 0  | 19  | RDR2-sensitive |
| AAGACAGGATGGACGGGATAGGAC  | 0  | 9   | RDR2-sensitive |
| AAGACATGTATCTTGACGAAGACA  | 1  | 30  | RDR2-sensitive |
| AAGACCGGGATTTGTAGTGGGCAG  | 0  | 33  | RDR2-sensitive |
| AAGACCTAGCTATGACACTGGCAC  | 0  | 27  | RDR2-sensitive |
| AAGACCTTAGACGACTATGCATGT  | 0  | 12  | RDR2-sensitive |
| AAGACGAACGTAGAAGCGCAGTGC  | 0  | 9   | RDR2-sensitive |
| AAGACGAAGATAGAATCATGTACA  | 0  | 13  | RDR2-sensitive |
| AAGACGAAGCTAGCAGCGCGATAT  | 0  | 15  | RDR2-sensitive |
| AAGACGATAGTGTAGACCAGGCAC  | 0  | 21  | RDR2-sensitive |
| AAGACGCCTCTGAACGACGTAGAA  | 0  | 20  | RDR2-sensitive |
| AAGACGGAGCCAGCAACGTGATAT  | 1  | 44  | RDR2-sensitive |
| AAGACGGATCTAGCTAGACGACGT  | 0  | 9   | RDR2-sensitive |
| AAGACGGCCTGAGTGGGACGGTTG  | 0  | 9   | RDR2-sensitive |
| AAGACGGTAGTGTAGACCAGGCAC  | 1  | 35  | RDR2-sensitive |
| AAGACGGTGCTGAACGTCGACGTC  | 0  | 11  | RDR2-sensitive |
| AAGACGTGACTGCATATGTCTGAC  | 0  | 10  | RDR2-sensitive |
| AAGACTAAGATCATTATTGATGGC  | 28 | 4   | RDR2-resistant |
| AAGACTACAATCGAAGGTCGTCGT  | 0  | 9   | RDR2-sensitive |
| AAGACTATGAGAGATGAGACGACA  | 0  | 12  | RDR2-sensitive |
| AAGACTCATAAACTCGGCTGGTAA  | 0  | 32  | RDR2-sensitive |
| AAGACTCATAACAAGCGCGGAACAG | 0  | 16  | RDR2-sensitive |
| AAGACTCATCGGCAGCAGACCAAC  | 0  | 10  | RDR2-sensitive |
| AAGACTCCTAAACTCGGCTGGTAA  | 0  | 78  | RDR2-sensitive |
| AAGACTCGACTCTCCCAAGGACG   | 26 | 2   | RDR2-resistant |
| AAGACTCTTAAACTCGGCTGGTAA  | 0  | 35  | RDR2-sensitive |
| AAGACTGCAGAGTGAAGCAGCAT   | 0  | 32  | RDR2-sensitive |
| AAGACTGCAGGAGCTACGGTGGGA  | 71 | 4   | RDR2-resistant |
| AAGACTGCATGCGCTCGCGGCTGC  | 3  | 21  | RDR2-sensitive |
| AAGACTGCATGCGCTCGCGGGTGC  | 0  | 16  | RDR2-sensitive |
| AAGACTGTAAAGGACGGATATAGA  | 0  | 22  | RDR2-sensitive |
| AAGACTGTAAAGGGTAGGCTGCCT  | 1  | 35  | RDR2-sensitive |
| AAGACTGTCTGCAGCGTTTGACGT  | 0  | 9   | RDR2-sensitive |
| AAGACTGTGTCCAGCAGACCGCTA  | 0  | 10  | RDR2-sensitive |
| AAGACTGTGTGTAAGGCTATCTCC  | 0  | 19  | RDR2-sensitive |
| AAGACTGTTATGTTGACGGGTCAT  | 0  | 25  | RDR2-sensitive |
| AAGACTGTTGTCTTTATTGCAGAG  | 0  | 21  | RDR2-sensitive |
| AAGACTTCAATCCAAGATCGTCGC  | 0  | 18  | RDR2-sensitive |
| AAGACTTCAATCGAAGATCGTCGT  | 5  | 115 | RDR2-sensitive |
| AAGACTTCAATCGAAGGTCGTCGT  | 15 | 116 | RDR2-sensitive |
| AAGACTTCAATCGAGGGTCGTCGT  | 0  | 9   | RDR2-sensitive |
| AAGACTTCTTAGTCGTGTCGGCAC  | 0  | 14  | RDR2-sensitive |
| AAGACTTGGTTATGTCTGACGGCT  | 0  | 11  | RDR2-sensitive |
| AAGACTTGTGGACCAGGCGTTGT   | 0  | 9   | RDR2-sensitive |

|                           |     |     |                |
|---------------------------|-----|-----|----------------|
| AAGACTTGTTTGATCGGTTGTGGT  | 0   | 15  | RDR2-sensitive |
| AAGACTTTAATCAAAGGTCGTCGT  | 0   | 12  | RDR2-sensitive |
| AAGACTTTGATCGAAGGTCGTCAT  | 0   | 13  | RDR2-sensitive |
| AAGAGACACAGTGGATGGAAGCTC  | 0   | 11  | RDR2-sensitive |
| AAGAGACAGGCTAGCACGGAECTT  | 1   | 25  | RDR2-sensitive |
| AAGAGACTGAAGCTGAGTCGCGAC  | 23  | 0   | RDR2-resistant |
| AAGAGACTGCATAACACAATCCTG  | 0   | 12  | RDR2-sensitive |
| AAGAGATATGGATGACTTACTTTT  | 17  | 0   | RDR2-resistant |
| AAGAGCCAAGTAGAACAGAGCCGT  | 0   | 18  | RDR2-sensitive |
| AAGAGCCAAGTAGAACGGAGCCAT  | 1   | 38  | RDR2-sensitive |
| AAGAGCCAAGTAGAACGGAGCCGT  | 7   | 227 | RDR2-sensitive |
| AAGAGCCAAGTAGAACGGAGTCAT  | 0   | 29  | RDR2-sensitive |
| AAGAGCCAAGTAGAACGGAGTCGT  | 2   | 68  | RDR2-sensitive |
| AAGAGCCAAGTAGAATGGAGCCGT  | 0   | 10  | RDR2-sensitive |
| AAGAGCCAAGTGGAACGGAACCGT  | 1   | 15  | RDR2-sensitive |
| AAGAGGAAGGAGGACGCAGGATAT  | 4   | 56  | RDR2-sensitive |
| AAGAGGAAGGAGGACGCGGGATAT  | 0   | 12  | RDR2-sensitive |
| AAGAGGATGGTTGGGGACGGAGTT  | 22  | 2   | RDR2-resistant |
| AAGAGGCGTCTGGTATACCTGAGT  | 15  | 0   | RDR2-resistant |
| AAGAGGGCTCCCTCAGGGTCTGGA  | 114 | 0   | RDR2-resistant |
| AAGAGGGCTCGGCAAACAGTACAT  | 0   | 11  | RDR2-sensitive |
| AAGAGGGCTCGGCACACAGTGCAT  | 0   | 28  | RDR2-sensitive |
| AAGAGGTGGATACGTCAACCCTGA  | 0   | 9   | RDR2-sensitive |
| AAGAGTAGAGGATGATGATAAGTA  | 17  | 1   | RDR2-resistant |
| AAGAGTCGACGTCTACGTGGATCT  | 5   | 31  | RDR2-sensitive |
| AAGAGTGGCATGATCCTGACGGAA  | 0   | 11  | RDR2-sensitive |
| AAGATACTGTATCTCAGCTGGAGG  | 29  | 5   | RDR2-resistant |
| AAGATAGAAGTCATCTGAGGCGTC  | 2   | 16  | RDR2-sensitive |
| AAGATAGTATCCGGTGCTTACTCC  | 63  | 1   | RDR2-resistant |
| AAGATATTGATGATGACCTCCCGT  | 14  | 0   | RDR2-resistant |
| AAGATCGGAAAGACCAGCGCGCGC  | 0   | 17  | RDR2-sensitive |
| AAGATCGGGGGTCGCGGACTCGGC  | 0   | 9   | RDR2-sensitive |
| AAGATGACTTGTTAGCAAAGGGCG  | 15  | 0   | RDR2-resistant |
| AAGATGCGACTGAACCAGCACAGA  | 0   | 21  | RDR2-sensitive |
| AAGATGGCTTCACTCGGACTACAT  | 0   | 13  | RDR2-sensitive |
| AAGATGGTATTGTGGACCAGGCAC  | 0   | 13  | RDR2-sensitive |
| AAGATGGTGAACACTGATTCGGAT  | 0   | 9   | RDR2-sensitive |
| AAGATGTTAGAAGATGTTGTGCTG  | 57  | 3   | RDR2-resistant |
| AAGATTAAGAGATCATATGTGCAT  | 21  | 2   | RDR2-resistant |
| AAGATTATAGGGATGTTTGGACTG  | 0   | 9   | RDR2-sensitive |
| AAGATTCGGGACGGATACAGGACG  | 1   | 12  | RDR2-sensitive |
| AAGATTGTCCTATGTCTGACGGCT  | 0   | 12  | RDR2-sensitive |
| AAGATTTCAATCAAAGGTCGTCGT  | 0   | 10  | RDR2-sensitive |
| AAGATTTGTAGAGTGACATCAAG   | 1   | 19  | RDR2-sensitive |
| AAGATTTGTGTTCCGGCAGGGGCGT | 0   | 14  | RDR2-sensitive |
| AAGATTTTGAGTCTATTTTCGTCGG | 1   | 21  | RDR2-sensitive |
| AAGCAAACGGCACATATGCTCTGA  | 1   | 14  | RDR2-sensitive |
| AAGCAACCGAGCCAGAGAACCAGC  | 0   | 9   | RDR2-sensitive |
| AAGCAACCTTGGCCAGATCGTCAC  | 0   | 30  | RDR2-sensitive |

|                           |    |     |                |
|---------------------------|----|-----|----------------|
| AAGCAACGGACACACCTTCGGCTC  | 7  | 52  | RDR2-sensitive |
| AAGCAACGGACGCACCTTCGACTC  | 0  | 14  | RDR2-sensitive |
| AAGCAATCCGGCTCGGAATCGTTC  | 2  | 38  | RDR2-sensitive |
| AAGCAATCCGGTTAGAAATCGTTC  | 1  | 12  | RDR2-sensitive |
| AAGCAATCCGGTTAGGAATCGTTC  | 0  | 11  | RDR2-sensitive |
| AAGCAATCTTTCGGATCGGCTGGC  | 0  | 13  | RDR2-sensitive |
| AAGCAATTCGTTGGTTGTTGCATA  | 0  | 17  | RDR2-sensitive |
| AAGCACAGATGTAGGTCGTCACTC  | 0  | 15  | RDR2-sensitive |
| AAGCACAGTGGACTAGCTCGGCAT  | 3  | 35  | RDR2-sensitive |
| AAGCACCGTCGGCACGATCTACAC  | 90 | 2   | RDR2-resistant |
| AAGCACGACAGAGGAAACACACGA  | 0  | 15  | RDR2-sensitive |
| AAGCACGACCTAGGCATGACTCGA  | 0  | 15  | RDR2-sensitive |
| AAGCACGAGATTCTGATTGGTTGC  | 0  | 11  | RDR2-sensitive |
| AAGCACGCGACAGACACGGAGCAC  | 0  | 10  | RDR2-sensitive |
| AAGCACGCGTTTGGATGGCTGCAC  | 0  | 9   | RDR2-sensitive |
| AAGCACGGCAGCAATAACGGACAG  | 0  | 13  | RDR2-sensitive |
| AAGCACGGGGGTCGCGGACTCGGC  | 2  | 50  | RDR2-sensitive |
| AAGCACGGGGTCGCGGACTCGGCC  | 2  | 17  | RDR2-sensitive |
| AAGCACGGTGTGTAGACGTCCATA  | 0  | 12  | RDR2-sensitive |
| AAGCACGTGAGCTCTCGTATGGCC  | 0  | 17  | RDR2-sensitive |
| AAGCACTCGGCAAACATGGCTCTC  | 3  | 23  | RDR2-sensitive |
| AAGCACTGCTTGCAGCATCGTCEGA | 0  | 20  | RDR2-sensitive |
| AAGCAGACCTGGCGATCTCTCTAC  | 0  | 9   | RDR2-sensitive |
| AAGCAGACTGCAAACATGTTCTTT  | 0  | 10  | RDR2-sensitive |
| AAGCAGACTGCTCACGGACTCCAA  | 0  | 9   | RDR2-sensitive |
| AAGCAGACTGTCATGATAATGCTT  | 78 | 3   | RDR2-resistant |
| AAGCAGACTGTCCATATTTTGTAG  | 35 | 0   | RDR2-resistant |
| AAGCAGACTGTTGCGCGACCTCAA  | 1  | 77  | RDR2-sensitive |
| AAGCAGACTGTTGCGCGACCTCGA  | 2  | 77  | RDR2-sensitive |
| AAGCAGAGGACTAGATTTTCTCT   | 22 | 1   | RDR2-resistant |
| AAGCAGAGTCGAACGCAGAGACCA  | 0  | 14  | RDR2-sensitive |
| AAGCAGCATCTGCTTGTGGTTGT   | 0  | 10  | RDR2-sensitive |
| AAGCAGCTGTAGGCTATAAGCTGT  | 0  | 33  | RDR2-sensitive |
| AAGCAGGACGCGGAACTCTCCAC   | 0  | 9   | RDR2-sensitive |
| AAGCAGGACTGCCCATATGCGCCA  | 0  | 11  | RDR2-sensitive |
| AAGCAGGAGCTAGAGCTTTGCCAA  | 0  | 9   | RDR2-sensitive |
| AAGCAGGAGCTGGAGCTTTGCCAA  | 4  | 101 | RDR2-sensitive |
| AAGCAGGAGTTGGAGCTTTGCCAA  | 0  | 9   | RDR2-sensitive |
| AAGCAGGCTGATCGAATTTGGAAG  | 26 | 1   | RDR2-resistant |
| AAGCAGGTCGCACGGGTTGCTTAG  | 0  | 27  | RDR2-sensitive |
| AAGCAGTAGGACATAAGTTAATGT  | 0  | 12  | RDR2-sensitive |
| AAGCAGTAGTTTGGACCGAGCCTC  | 1  | 17  | RDR2-sensitive |
| AAGCAGTCGGTAGCAACTACTACT  | 0  | 23  | RDR2-sensitive |
| AAGCAGTCTCGGATGAAGTGGTAT  | 46 | 9   | RDR2-resistant |
| AAGCAGTTGAGAGTAGTGGAAGGC  | 28 | 4   | RDR2-resistant |
| AAGCAGTTGTAGGCTGTAAGCTGT  | 0  | 9   | RDR2-sensitive |
| AAGCATATAGGTTTGTGGCTCGGT  | 0  | 9   | RDR2-sensitive |
| AAGCATCAAACGTTAGTCGGTAT   | 0  | 37  | RDR2-sensitive |
| AAGCATCGGCCTACACTCTCAGGC  | 1  | 13  | RDR2-sensitive |

|                           |    |    |                |
|---------------------------|----|----|----------------|
| AAGCATCGTGAAGTGTCCGGCACC  | 0  | 10 | RDR2-sensitive |
| AAGCATGGGCTGGTATATTGACAC  | 18 | 1  | RDR2-resistant |
| AAGCATGTTTACTGCCTCAGCAT   | 0  | 12 | RDR2-sensitive |
| AAGCATTGATGGTGAAGTGTCTCT  | 31 | 3  | RDR2-resistant |
| AAGCCACAGATCGTTCGTGTCGCC  | 0  | 19 | RDR2-sensitive |
| AAGCCACGTTCCGACATACGTGCG  | 0  | 13 | RDR2-sensitive |
| AAGCCCGAAGCACGATGAACCCGC  | 0  | 14 | RDR2-sensitive |
| AAGCCCGCCCGCTTATTCTACCGT  | 0  | 10 | RDR2-sensitive |
| AAGCCCGTTGGACCGGCAGCTCAG  | 0  | 10 | RDR2-sensitive |
| AAGCCGAGCTCCCACGGTTCGTGCG | 0  | 22 | RDR2-sensitive |
| AAGCCGCTGACGGTGTAGAATCAA  | 0  | 48 | RDR2-sensitive |
| AAGCCGGGTTGGACTGCACGACGG  | 0  | 17 | RDR2-sensitive |
| AAGCCGTGTCGGGTCTGGACTGGC  | 0  | 45 | RDR2-sensitive |
| AAGCCTCTCAGGAAACGGTACTGT  | 1  | 14 | RDR2-sensitive |
| AAGCCTCTGTACTAGTTCGCGGAC  | 1  | 17 | RDR2-sensitive |
| AAGCCTGAACCAGACGAAGGTCTGA | 0  | 17 | RDR2-sensitive |
| AAGCCTGCGGCACGTTCAACTTTT  | 0  | 16 | RDR2-sensitive |
| AAGCGAAGTGAGCACACTGTACGA  | 0  | 29 | RDR2-sensitive |
| AAGCGACGCTGAGCAGAGGACTTC  | 0  | 28 | RDR2-sensitive |
| AAGCGAGACATGGTTGATTTATGA  | 31 | 0  | RDR2-resistant |
| AAGCGCTTGGCTGATCTGTCGGGT  | 16 | 0  | RDR2-resistant |
| AAGCGGACCTACTAGCCAGCCGGG  | 0  | 10 | RDR2-sensitive |
| AAGCGGGCATTGCAATTGACGCAT  | 31 | 1  | RDR2-resistant |
| AAGCGGGCGGGCTTGGACAGGAAA  | 1  | 12 | RDR2-sensitive |
| AAGCGGGTTCGGGCTCGGACAGAAA | 0  | 9  | RDR2-sensitive |
| AAGCGGGTGAGTAGCAGTAGGCTA  | 17 | 0  | RDR2-resistant |
| AAGCGGTAGACTTTTTACATCACA  | 3  | 89 | RDR2-sensitive |
| AAGCGGTAGACTTTTTACATCCCA  | 0  | 12 | RDR2-sensitive |
| AAGCGGTAGGATTTTTACATCACA  | 1  | 27 | RDR2-sensitive |
| AAGCGGTAGGCTTTTTACATCACA  | 4  | 87 | RDR2-sensitive |
| AAGCGGTCAGACGGTGGAGACAGA  | 0  | 11 | RDR2-sensitive |
| AAGCGGTCGCTGTAGACGGTGC    | 0  | 14 | RDR2-sensitive |
| AAGCGGTTTCTCCAAAGATTAGTG  | 22 | 2  | RDR2-resistant |
| AAGCGTTCGAGACGGTCCGAGCCGA | 0  | 9  | RDR2-sensitive |
| AAGCGTCTAGACTTGAACCGGTAG  | 0  | 11 | RDR2-sensitive |
| AAGCGTTGTACGGATGCAGTGC    | 2  | 20 | RDR2-sensitive |
| AAGCTAACTTGTGAATTTGATGCA  | 14 | 0  | RDR2-resistant |
| AAGCTAAGCTCTGGCAGACTTCAT  | 1  | 16 | RDR2-sensitive |
| AAGCTAATTACACAGATGAGGACT  | 20 | 0  | RDR2-resistant |
| AAGCTACAAGTTGGACGGTGTCTT  | 26 | 0  | RDR2-resistant |
| AAGCTACATAATAGGACGATTGCT  | 33 | 2  | RDR2-resistant |
| AAGCTACGGGACAGTGAGAAGGAC  | 0  | 14 | RDR2-sensitive |
| AAGCTACTGTGCTACTGGGCGGAC  | 0  | 10 | RDR2-sensitive |
| AAGCTACTGTTGCAGTTTGGACGG  | 1  | 20 | RDR2-sensitive |
| AAGCTAGACTGTCGACGGCCGGA   | 0  | 9  | RDR2-sensitive |
| AAGCTAGAGCTCATGGAGCTGGAC  | 18 | 0  | RDR2-resistant |
| AAGCTAGATCTCGCTCGACGCAAC  | 0  | 28 | RDR2-sensitive |
| AAGCTAGATCTCGCTCGTCGCAAC  | 0  | 12 | RDR2-sensitive |
| AAGCTAGATCTCGTTCGTCGCAAC  | 0  | 12 | RDR2-sensitive |



|                           |    |    |                |
|---------------------------|----|----|----------------|
| AAGCTAGCAACCGGCGCCTCTGCT  | 94 | 5  | RDR2-resistant |
| AAGCTAGCGACGGTGTCTGACAA   | 0  | 10 | RDR2-sensitive |
| AAGCTAGCTGTTTGGCAGAACTTC  | 1  | 31 | RDR2-sensitive |
| AAGCTATGTTTCGACGGTATCTGCT | 0  | 44 | RDR2-sensitive |
| AAGCTCCGTCGGCTACGTATCACC  | 95 | 2  | RDR2-resistant |
| AAGCTCCTGCACCAGGTCGCGGAC  | 0  | 17 | RDR2-sensitive |
| AAGCTCCTGTTTGATTGTCTGTAC  | 0  | 10 | RDR2-sensitive |
| AAGCTCGAAGAAGGAACTCGGCTT  | 2  | 37 | RDR2-sensitive |
| AAGCTCGGACAGGAAACTAGGCAC  | 0  | 10 | RDR2-sensitive |
| AAGCTCGGCACTACAGATCACGGT  | 0  | 49 | RDR2-sensitive |
| AAGCTCGGCGCAATGATGACGGT   | 0  | 13 | RDR2-sensitive |
| AAGCTCGGCTTGGGCTCGTTCGGA  | 0  | 11 | RDR2-sensitive |
| AAGCTCTGATGAAGCTGCTGCATT  | 93 | 6  | RDR2-resistant |
| AAGCTCTGGACATGTCAGACTGCA  | 1  | 14 | RDR2-sensitive |
| AAGCTGACGGGCAGGATGAAGCAA  | 0  | 14 | RDR2-sensitive |
| AAGCTGACGTGGCTATAGCCTGAG  | 0  | 10 | RDR2-sensitive |
| AAGCTGACTGTGGGAAAAGGTGG   | 0  | 10 | RDR2-sensitive |
| AAGCTGACTGTGGGGAGAAGCTGG  | 1  | 38 | RDR2-sensitive |
| AAGCTGACTTCGGACGGCTCCCTC  | 0  | 12 | RDR2-sensitive |
| AAGCTGATGTGGCTATAGCCTGAG  | 1  | 15 | RDR2-sensitive |
| AAGCTGCAAAGGCCTGATGGGCGC  | 0  | 9  | RDR2-sensitive |
| AAGCTGCAAAGGCCTGATGGGTGC  | 1  | 14 | RDR2-sensitive |
| AAGCTGCAGAAGTCTGATGGACGC  | 0  | 13 | RDR2-sensitive |
| AAGCTGCAGAGGCCTGATGGGTGC  | 1  | 22 | RDR2-sensitive |
| AAGCTGCTGTGTGATGGCGACTGT  | 0  | 13 | RDR2-sensitive |
| AAGCTGCTTTTTCAACAAGCAGCA  | 0  | 12 | RDR2-sensitive |
| AAGCTGGATGCATGGATGATCTCT  | 18 | 1  | RDR2-resistant |
| AAGCTGGGCTGCACGCGCGGATAT  | 0  | 9  | RDR2-sensitive |
| AAGCTGGTAGGGCCGAGCACACGG  | 0  | 22 | RDR2-sensitive |
| AAGCTGTATCTAGTGGCACTTGTG  | 31 | 1  | RDR2-resistant |
| AAGCTGTATGAGCGGATGTAAAAC  | 0  | 9  | RDR2-sensitive |
| AAGCTGTATGAGCGGATGTAAAGAT | 0  | 16 | RDR2-sensitive |
| AAGCTGTTGCAGGCTTGTGCGCGT  | 0  | 14 | RDR2-sensitive |
| AAGCTGTTGTAGGCTGCAAGCTGT  | 9  | 34 | RDR2-sensitive |
| AAGCTTATATTCGACGGTCTCTAT  | 1  | 14 | RDR2-sensitive |
| AAGCTTATCTCGGACGGCTTGTCT  | 0  | 18 | RDR2-sensitive |
| AAGCTTATGTCCGACGGCTGTCAG  | 1  | 25 | RDR2-sensitive |
| AAGCTTATGTCCGACGGTCACTGA  | 0  | 37 | RDR2-sensitive |
| AAGCTTATGTCCGACGGTCTCTGC  | 1  | 27 | RDR2-sensitive |
| AAGCTTATGTCTGACGGCTTTGAT  | 0  | 9  | RDR2-sensitive |
| AAGCTTATGTCTGACGGTCTCCTA  | 0  | 31 | RDR2-sensitive |
| AAGCTTATGTTTCGACGGCCGCTAG | 0  | 9  | RDR2-sensitive |
| AAGCTTATGTTTGGTTGTCTGCAC  | 0  | 9  | RDR2-sensitive |
| AAGCTTGAAGTGGGACGGCGATCAC | 1  | 17 | RDR2-sensitive |
| AAGCTTGAGGCTCGCGAGTCGGCT  | 0  | 10 | RDR2-sensitive |
| AAGCTTGAGTGAGTTTGTCTGAAA  | 47 | 0  | RDR2-resistant |
| AAGCTTGTAGACATAATAATTTAA  | 78 | 3  | RDR2-resistant |
| AAGCTTTGGATGGTCTGTGACGC   | 0  | 12 | RDR2-sensitive |
| AAGGAAACCTGGGAACCGGCAAAG  | 1  | 13 | RDR2-sensitive |

|                            |    |     |                |
|----------------------------|----|-----|----------------|
| AAGGAACATGCAGGTGGGACCCAT   | 0  | 21  | RDR2-sensitive |
| AAGGAACCCTGTGGTGCGGTCGGA   | 0  | 12  | RDR2-sensitive |
| AAGGAACCGAGGCAGAGAACCAGC   | 0  | 9   | RDR2-sensitive |
| AAGGAACGTCGCTGTCATGGCTAT   | 0  | 23  | RDR2-sensitive |
| AAGGAACTAGAGTGCAGGGACATA   | 0  | 13  | RDR2-sensitive |
| AAGGAACTGTAGCCCAACGGCTAG   | 0  | 13  | RDR2-sensitive |
| AAGGAACTTAAGAACGCAGTGTAG   | 0  | 10  | RDR2-sensitive |
| AAGGAAGAACTGTGGTGAGGACGC   | 0  | 10  | RDR2-sensitive |
| AAGGAAGACGCAGGCTGCATGAGC   | 0  | 10  | RDR2-sensitive |
| AAGGAAGTAGCAGCACGGTCACTA   | 15 | 0   | RDR2-resistant |
| AAGGAATGTGGACGAGTGATGGTT   | 0  | 11  | RDR2-sensitive |
| AAGGAATGTTGATTTTAAGACGGG   | 0  | 11  | RDR2-sensitive |
| AAGGAATGTTGATTTTAAGACGGT   | 0  | 9   | RDR2-sensitive |
| AAGGAATGTTGATTTTAAGCGGG    | 0  | 10  | RDR2-sensitive |
| AAGGACAAACAGGAGGAGGAGCGC   | 0  | 10  | RDR2-sensitive |
| AAGGACAACACTGTAGATAGGCCTAA | 0  | 10  | RDR2-sensitive |
| AAGGACAACACTGTAGGTGGGCCTAA | 10 | 522 | RDR2-sensitive |
| AAGGACAACACTGTAGGTGGGCCTCA | 0  | 13  | RDR2-sensitive |
| AAGGACAACACTGTAGGTGGGTCTAA | 0  | 20  | RDR2-sensitive |
| AAGGACAACACTGTAGTGGGCCTAAT | 0  | 11  | RDR2-sensitive |
| AAGGACAGGAACACAGTGGGCTGA   | 0  | 12  | RDR2-sensitive |
| AAGGACAGTAGTCCCGGACGGTTT   | 0  | 14  | RDR2-sensitive |
| AAGGACAGTTGGTTAGGAAGGCTT   | 0  | 10  | RDR2-sensitive |
| AAGGACATAGTTGGCACGACGCAT   | 0  | 16  | RDR2-sensitive |
| AAGGACATCTGTAGGTAGGCCTAA   | 0  | 20  | RDR2-sensitive |
| AAGGACATCTGTAGGTGGGCCTAA   | 0  | 30  | RDR2-sensitive |
| AAGGACATGTGCATGTGGGCCCAA   | 1  | 15  | RDR2-sensitive |
| AAGGACCGTACCGAAAGTAGGCTT   | 0  | 9   | RDR2-sensitive |
| AAGGACCGTACCGTTGACTGGCCT   | 2  | 17  | RDR2-sensitive |
| AAGGACCGTTTAGAGGACGTTGCT   | 2  | 50  | RDR2-sensitive |
| AAGGACCTTCGTCCCTCGAGGCAT   | 2  | 16  | RDR2-sensitive |
| AAGGACGAACGACAGGAGAGCCAA   | 2  | 16  | RDR2-sensitive |
| AAGGACGCCGACGACTGCACGGCA   | 75 | 0   | RDR2-resistant |
| AAGGACGGGAGAACCAGTCGACGC   | 0  | 10  | RDR2-sensitive |
| AAGGACGTGCTTTTCTAATATCTT   | 90 | 0   | RDR2-resistant |
| AAGGACGTGGTCATGAGGCTTCAA   | 0  | 14  | RDR2-sensitive |
| AAGGACTACCGTAACAGCGACCGC   | 0  | 14  | RDR2-sensitive |
| AAGGACTCCCAGCAGCAATCAGCC   | 17 | 0   | RDR2-resistant |
| AAGGACTCGACAGCCCCGACAGCT   | 6  | 22  | RDR2-sensitive |
| AAGGACTCGCCCTGGCGGCGGCC    | 25 | 1   | RDR2-resistant |
| AAGGACTGACAACAACGTCGGTTG   | 69 | 6   | RDR2-resistant |
| AAGGACTGCCACACGCGCGCGCGC   | 3  | 20  | RDR2-sensitive |
| AAGGACTGCTTGCATAACCGTCGT   | 0  | 9   | RDR2-sensitive |
| AAGGACTGCTTGCATAGCCGTTGT   | 0  | 11  | RDR2-sensitive |
| AAGGACTTAGGGCTCTGGCGACGG   | 0  | 15  | RDR2-sensitive |
| AAGGACTTGTTGTTGTGTCGGA     | 34 | 4   | RDR2-resistant |
| AAGGAGACGTCAGCAAGGACCCGA   | 1  | 16  | RDR2-sensitive |
| AAGGAGACGTCAGCAAGGATTCGA   | 0  | 9   | RDR2-sensitive |
| AAGGAGATGGTGACCGCTGATTGA   | 0  | 30  | RDR2-sensitive |

|                           |      |     |                |
|---------------------------|------|-----|----------------|
| AAGGAGCCTGCAGAAGCGCTGCTT  | 0    | 12  | RDR2-sensitive |
| AAGGAGCGTAGGCGTGCACACCAA  | 0    | 14  | RDR2-sensitive |
| AAGGAGCTCGTAGAGAAGGCGCCC  | 0    | 25  | RDR2-sensitive |
| AAGGAGGAGCTGGCCAGAGCATGC  | 0    | 27  | RDR2-sensitive |
| AAGGAGGCTAGTAGGAACGGTCCA  | 0    | 10  | RDR2-sensitive |
| AAGGAGTCGATGGCTGGCGCGTGC  | 26   | 0   | RDR2-resistant |
| AAGGAGTGATGGTTTCATTAGCTTT | 21   | 1   | RDR2-resistant |
| AAGGATACGGGCAACACTTCTCAC  | 0    | 11  | RDR2-sensitive |
| AAGGATAGCCGACGCGGACAGCAT  | 0    | 17  | RDR2-sensitive |
| AAGGATCGACAGGCGCGAGACGAG  | 21   | 2   | RDR2-resistant |
| AAGGATCGAGAAGAGGAGGAGCAA  | 0    | 16  | RDR2-sensitive |
| AAGGATCTGACCAGCAAGATGCAT  | 0    | 16  | RDR2-sensitive |
| AAGGATCTGGATCAGAGCGCATGG  | 0    | 9   | RDR2-sensitive |
| AAGGATCTGGATCATCAGAGCGCA  | 1    | 68  | RDR2-sensitive |
| AAGGATCTGGATCATCAGAGCGTA  | 0    | 26  | RDR2-sensitive |
| AAGGATCTTCCAAGAAGACTGGCAA | 0    | 9   | RDR2-sensitive |
| AAGGATGAAGACTGCTGTAGTTGA  | 0    | 12  | RDR2-sensitive |
| AAGGATGAGATGTGGGTGATGCAT  | 0    | 12  | RDR2-sensitive |
| AAGGATGAGCTGAACCGTGTGCAT  | 0    | 9   | RDR2-sensitive |
| AAGGATGTGTAGTGTGATGGCTGC  | 0    | 10  | RDR2-sensitive |
| AAGGATGTGTTTGGTTGGATGGTC  | 0    | 10  | RDR2-sensitive |
| AAGGATGTTTGTATTTGGGTAT    | 1196 | 0   | RDR2-resistant |
| AAGGATTCCTTGGTCTCGAGTTT   | 24   | 1   | RDR2-resistant |
| AAGGATTGCTTGCACAACAGTCGT  | 0    | 9   | RDR2-sensitive |
| AAGGATTGGTATACGTGGGACCGA  | 0    | 9   | RDR2-sensitive |
| AAGGATTGTGGTGTAAGATTGCAC  | 0    | 34  | RDR2-sensitive |
| AAGGATTTAGCGACTGACCGTCGG  | 0    | 26  | RDR2-sensitive |
| AAGGCAAGTAAACTTGTGATGGTT  | 21   | 0   | RDR2-resistant |
| AAGGCAATAGTGTAGACTAGGCAC  | 0    | 27  | RDR2-sensitive |
| AAGGCAATTAATGTATGGATATGG  | 14   | 0   | RDR2-resistant |
| AAGGCACAGTGTCGGACGGTCCGC  | 0    | 10  | RDR2-sensitive |
| AAGGCACGCAGGACTGTGCAGGCA  | 0    | 107 | RDR2-sensitive |
| AAGGCACGCAGGACTGTGCAGGCC  | 0    | 10  | RDR2-sensitive |
| AAGGCACGCAGGACTGTGCAGGCT  | 3    | 37  | RDR2-sensitive |
| AAGGCACGTTAGAATGGACGGAGA  | 0    | 9   | RDR2-sensitive |
| AAGGCACTCGACAAAGGGACTGGC  | 0    | 15  | RDR2-sensitive |
| AAGGCACTCGGCAAAGATACTGGC  | 0    | 14  | RDR2-sensitive |
| AAGGCACTCGGCAAAGGGACTGGC  | 2    | 14  | RDR2-sensitive |
| AAGGCACTGTTGGGGTAGTTTTTC  | 0    | 9   | RDR2-sensitive |
| AAGGCAGAACATGGGTGTGAACGC  | 0    | 9   | RDR2-sensitive |
| AAGGCAGACTCACCACAATGACGC  | 2    | 22  | RDR2-sensitive |
| AAGGCAGATAGACGAAGCCTCTGA  | 0    | 15  | RDR2-sensitive |
| AAGGCAGCAAGCATGAACAAGCAT  | 0    | 9   | RDR2-sensitive |
| AAGGCATCACGTAGGGACTGGCGT  | 0    | 23  | RDR2-sensitive |
| AAGGCCAGGTAGAGCGGTTAGTTT  | 0    | 54  | RDR2-sensitive |
| AAGGCCAGGTAGAGCGGTTGGTTT  | 0    | 173 | RDR2-sensitive |
| AAGGCCCGTGGGCCGTCGGACGAC  | 59   | 0   | RDR2-resistant |
| AAGGCCTATGTACGAGCGTCCGTT  | 0    | 31  | RDR2-sensitive |
| AAGGCCTCGAGCGAAGGGTGGCGT  | 0    | 9   | RDR2-sensitive |

|                           |    |    |                |
|---------------------------|----|----|----------------|
| AAGGCCTGTGGCATGCACACTAGT  | 63 | 9  | RDR2-resistant |
| AAGGCCTGTTTGGTTCGTGGCTAA  | 0  | 9  | RDR2-sensitive |
| AAGGCGGCACTACAGTACACACAT  | 0  | 11 | RDR2-sensitive |
| AAGGCGGGCAACATACGTGTAGAC  | 0  | 13 | RDR2-sensitive |
| AAGGCGGGCTGGGCAGCAGCTAGG  | 22 | 1  | RDR2-resistant |
| AAGGCTAGTAGCAAGGTCTCGGTC  | 0  | 10 | RDR2-sensitive |
| AAGGCTATATACTCGTTGGATACA  | 22 | 2  | RDR2-resistant |
| AAGGCTATGTCTGACGGTTGGTCC  | 0  | 18 | RDR2-sensitive |
| AAGGCTCAGCTCTGGTCGTGGGTT  | 0  | 16 | RDR2-sensitive |
| AAGGCTCGGCAAACAGTACATCGG  | 1  | 27 | RDR2-sensitive |
| AAGGCTCGGCAAACAGTGCATCGG  | 0  | 13 | RDR2-sensitive |
| AAGGCTCTAACCTTGTGGTCGTG   | 12 | 65 | RDR2-sensitive |
| AAGGCTGCAAGAGTAATCGGTCAT  | 0  | 17 | RDR2-sensitive |
| AAGGCTGCAAGAGTAGTCGGCCAT  | 0  | 9  | RDR2-sensitive |
| AAGGCTGCAAGAGTAGTTGGTCAT  | 0  | 20 | RDR2-sensitive |
| AAGGCTGCAAGCATGAACAAGCAT  | 1  | 21 | RDR2-sensitive |
| AAGGCTGCAGAGTTGCCGACGCTG  | 26 | 2  | RDR2-resistant |
| AAGGCTGCCTCCAACAATAGACGA  | 0  | 14 | RDR2-sensitive |
| AAGGCTGGGACTAACAGTGGCTGT  | 0  | 9  | RDR2-sensitive |
| AAGGCTGGGAGACGCTACATGCAT  | 0  | 10 | RDR2-sensitive |
| AAGGCTGGGATGAGCAACGCACAC  | 0  | 14 | RDR2-sensitive |
| AAGGCTGTAAGAGTAGTCGGCCAT  | 2  | 23 | RDR2-sensitive |
| AAGGCTGTAAGGGGTAGACTGCCT  | 0  | 13 | RDR2-sensitive |
| AAGGCTGTAAGGGGTAGGCTGCCT  | 3  | 28 | RDR2-sensitive |
| AAGGCTGTAGACAGGTCGTCAGGC  | 0  | 9  | RDR2-sensitive |
| AAGGCTGTCAGATATAAAGGTATT  | 0  | 10 | RDR2-sensitive |
| AAGGCTGTCTCTGTCTGAGGACCAT | 0  | 39 | RDR2-sensitive |
| AAGGCTGTGGATGATCCGGTATGT  | 1  | 13 | RDR2-sensitive |
| AAGGCTGTGTGTGTGAGATGACGC  | 0  | 11 | RDR2-sensitive |
| AAGGCTTCTAACCTTATGGTCGTG  | 0  | 10 | RDR2-sensitive |
| AAGGCTTCTAACCTTGTAGTCGTG  | 0  | 13 | RDR2-sensitive |
| AAGGCTTCTAACCTTGTGGTCGTG  | 4  | 67 | RDR2-sensitive |
| AAGGCTTGTCTGGTTGTTCTGTCGC | 0  | 13 | RDR2-sensitive |
| AAGGGACAACAGGGGACAACACAG  | 0  | 21 | RDR2-sensitive |
| AAGGGACCGAATTTAGGGGACGTT  | 0  | 11 | RDR2-sensitive |
| AAGGGACCGACACGTAGAGAGCGC  | 0  | 14 | RDR2-sensitive |
| AAGGGACCGGTATGCACGCCTTGG  | 0  | 9  | RDR2-sensitive |
| AAGGGACCTGTGGTAGACGGGCAA  | 0  | 14 | RDR2-sensitive |
| AAGGGACGGTGTAGTGGATCACGA  | 0  | 30 | RDR2-sensitive |
| AAGGGACTGTAAACGAACCGGTAA  | 0  | 43 | RDR2-sensitive |
| AAGGGAGCGCGACGGCAGAACCGT  | 0  | 11 | RDR2-sensitive |
| AAGGGAGCTTCGGCATGATGACAT  | 0  | 10 | RDR2-sensitive |
| AAGGGAGGACGGGTTCAACAGCTC  | 0  | 9  | RDR2-sensitive |
| AAGGGAGGGATTAGCAACTCACAC  | 0  | 11 | RDR2-sensitive |
| AAGGGAGGTGCTGTAGCCGGCTAG  | 0  | 12 | RDR2-sensitive |
| AAGGGATGTTGACGAGTTGGAGGC  | 0  | 10 | RDR2-sensitive |
| AAGGGATTGGGTGAAAGGCTTGGA  | 0  | 9  | RDR2-sensitive |
| AAGGGCAGTAGGGGAGTGGTCAGT  | 2  | 19 | RDR2-sensitive |
| AAGGGCATGTACAACGGTGTTTAA  | 0  | 9  | RDR2-sensitive |

|                           |     |     |                |
|---------------------------|-----|-----|----------------|
| AAGGGCATGTACAGTGGGTGTCTT  | 0   | 12  | RDR2-sensitive |
| AAGGGCATGTACAGTGGTGTTTAA  | 2   | 19  | RDR2-sensitive |
| AAGGGCGCATCACCGTCCGGATAG  | 0   | 9   | RDR2-sensitive |
| AAGGGCTAGGACGACATGCTTCAC  | 0   | 9   | RDR2-sensitive |
| AAGGGCTAGTTTGGATCGGCGCGC  | 0   | 11  | RDR2-sensitive |
| AAGGGCTTGTTCGGTTACACCAAT  | 1   | 16  | RDR2-sensitive |
| AAGGGCTTGTTCGGTTATTCCCAA  | 14  | 60  | RDR2-sensitive |
| AAGGGCTTGTTCGGTTATTCTAT   | 2   | 14  | RDR2-sensitive |
| AAGGGCTTGTTCGGTTCTACCCCA  | 0   | 12  | RDR2-sensitive |
| AAGGGGACAGATAGCATGATGCAT  | 0   | 12  | RDR2-sensitive |
| AAGGGGACCGACACGTAGGGACGC  | 0   | 15  | RDR2-sensitive |
| AAGGGGGTAACCACTAGATCTCGT  | 3   | 16  | RDR2-sensitive |
| AAGGGGTAGACTGTCATTCCGTGT  | 0   | 9   | RDR2-sensitive |
| AAGGGTAACTCACCACGTCGTCGT  | 1   | 13  | RDR2-sensitive |
| AAGGGTAGTCTTTGTTCTGTCTGT  | 0   | 18  | RDR2-sensitive |
| AAGGGTCAGCAGAGAACGACAGAG  | 0   | 14  | RDR2-sensitive |
| AAGGGTCGGAAGGAGGAGGACGGA  | 19  | 0   | RDR2-resistant |
| AAGGGTCTGACGCAGAAGAACTGT  | 0   | 10  | RDR2-sensitive |
| AAGGGTTGTTTTCTTTGATTCCGA  | 0   | 10  | RDR2-sensitive |
| AAGGGTTTAGGGGTGACTGTAGC   | 0   | 9   | RDR2-sensitive |
| AAGGGTTTTGTGAAGATATCGGCT  | 80  | 0   | RDR2-resistant |
| AAGGTAACGACCTGATTGTTAGGC  | 0   | 10  | RDR2-sensitive |
| AAGGTAAGCTTTAGGTCGTTCCGGC | 0   | 13  | RDR2-sensitive |
| AAGGTACACTAGAGTAGATATCAT  | 14  | 0   | RDR2-resistant |
| AAGGTAGACGGCTGCAGTAGTTTT  | 0   | 10  | RDR2-sensitive |
| AAGGTAGACTGACTTAGACGGATT  | 0   | 11  | RDR2-sensitive |
| AAGGTAGAGCAGTGCTGATGACGT  | 0   | 14  | RDR2-sensitive |
| AAGGTAGGATTCTGGAATTGCATA  | 28  | 4   | RDR2-resistant |
| AAGGTCAGGGTATGGATAGACGAC  | 0   | 10  | RDR2-sensitive |
| AAGGTCATTCTATCTTTAAGTCGG  | 11  | 102 | RDR2-sensitive |
| AAGGTCCGTAACCTCTGGATCGGAT | 0   | 14  | RDR2-sensitive |
| AAGGTCCGAGTCGTAGGTCGTTTGG | 1   | 13  | RDR2-sensitive |
| AAGGTCCGGTGTAGTTGACGCGCCA | 1   | 43  | RDR2-sensitive |
| AAGGTCGTGCTGTTGTTATGGTGC  | 0   | 10  | RDR2-sensitive |
| AAGGTCTCGAACGGCAAGGGCTTC  | 3   | 33  | RDR2-sensitive |
| AAGGTCTCGAACGGCACCGGCTTC  | 1   | 19  | RDR2-sensitive |
| AAGGTCTGATGAAAATTTTCGGCT  | 0   | 9   | RDR2-sensitive |
| AAGGTCTTCGAGGAACGGCGACAG  | 0   | 10  | RDR2-sensitive |
| AAGGTGACGGCCAGAGTAGAAGCA  | 0   | 23  | RDR2-sensitive |
| AAGGTGACTTGCATCAACTGGACC  | 0   | 13  | RDR2-sensitive |
| AAGGTGCAACTCGTGAGCCGGCAT  | 0   | 13  | RDR2-sensitive |
| AAGGTGCTTTCAGGAGTAGGACGG  | 0   | 15  | RDR2-sensitive |
| AAGGTGTTGATGGATAAGTTGGA   | 23  | 0   | RDR2-resistant |
| AAGGTGTTGTTGGAGGCAGTCTAA  | 0   | 18  | RDR2-sensitive |
| AAGGTGTTTTAGGAGTAGGACGGT  | 9   | 107 | RDR2-sensitive |
| AAGGTGTTTTCGGACCTTCGGCAT  | 0   | 10  | RDR2-sensitive |
| AAGGTGTTTTAGGAGTAGGACGG   | 4   | 34  | RDR2-sensitive |
| AAGGTTAAGAAGGTATGATAACTA  | 228 | 7   | RDR2-resistant |
| AAGGTTAGCCTCGGACGAGTCATG  | 0   | 11  | RDR2-sensitive |

|                           |     |     |                |
|---------------------------|-----|-----|----------------|
| AAGGTTAGGTCCGACGGCTTGTCT  | 0   | 22  | RDR2-sensitive |
| AAGGTTAGTTATTCAATTCGGACG  | 0   | 9   | RDR2-sensitive |
| AAGGTTAGTTCCTCGATTCCGGATG | 0   | 17  | RDR2-sensitive |
| AAGGTTAGTTCTTCAATTCGGACG  | 0   | 20  | RDR2-sensitive |
| AAGGTTATTCTTAGATCACTCGTT  | 32  | 3   | RDR2-resistant |
| AAGGTTGAAGTAGATTACATCGGA  | 86  | 0   | RDR2-resistant |
| AAGGTTGATAGTTGTATGGACGGT  | 0   | 17  | RDR2-sensitive |
| AAGGTTGCTTCTCTGCGAAGACTG  | 0   | 29  | RDR2-sensitive |
| AAGGTTGGCATGCTAGGTTTCGGT  | 15  | 0   | RDR2-resistant |
| AAGGTTGGCCGCGCGGGAGAACGG  | 0   | 9   | RDR2-sensitive |
| AAGGTTGGGGATGGTTCAAACACC  | 20  | 2   | RDR2-resistant |
| AAGGTTGTACATGCTCTTAGAGGA  | 0   | 11  | RDR2-sensitive |
| AAGGTTGTAGCTAGGACTGGGCAT  | 0   | 128 | RDR2-sensitive |
| AAGGTTGTTTCGTCGACGACGACAT | 0   | 11  | RDR2-sensitive |
| AAGGTTGTTCTGTGACTTGGTCGT  | 0   | 9   | RDR2-sensitive |
| AAGGTTGTTTCTAGTAGACGGCGA  | 0   | 16  | RDR2-sensitive |
| AAGGTTTACGAGAGCTGACGACAT  | 18  | 0   | RDR2-resistant |
| AAGGTTTCGTAGAGCAGGAGGGGA  | 1   | 17  | RDR2-sensitive |
| AAGGTTTTCTCCTGTTCCCTCGGAC | 63  | 14  | RDR2-resistant |
| AAGGTTTTCTCTTGTTCCTCGGAT  | 40  | 0   | RDR2-resistant |
| AAGGTTTTGTAGAGCAGAAGGTGA  | 0   | 11  | RDR2-sensitive |
| AAGTAAAGTTTGGCGCTGTTAATC  | 138 | 2   | RDR2-resistant |
| AAGTAACGGTGACGGATCCTTTGC  | 0   | 17  | RDR2-sensitive |
| AAGTAATAGATGGACTGCTTTTTA  | 27  | 0   | RDR2-resistant |
| AAGTAATGATGGCTTAGAAACATT  | 24  | 1   | RDR2-resistant |
| AAGTACACGGACGCTCGCGCACGC  | 0   | 30  | RDR2-sensitive |
| AAGTACCGGATGACTGAGCGGAGC  | 0   | 12  | RDR2-sensitive |
| AAGTACTCGGTATGCAGGGGCGAA  | 0   | 9   | RDR2-sensitive |
| AAGTACTCTGATTATATTATGGCA  | 0   | 12  | RDR2-sensitive |
| AAGTACTGTGACGGAACCTCCCAA  | 0   | 85  | RDR2-sensitive |
| AAGTACTGTTTCTCACGCGTGCAT  | 0   | 26  | RDR2-sensitive |
| AAGTAGAACATTAAGAATGGCATT  | 38  | 3   | RDR2-resistant |
| AAGTAGAACGGACGGATGGGACGC  | 0   | 12  | RDR2-sensitive |
| AAGTAGAACGGTAGAACACGGTG   | 0   | 10  | RDR2-sensitive |
| AAGTAGAACTCCGTATAAACGGTG  | 0   | 15  | RDR2-sensitive |
| AAGTAGACTGTAAATGACGGGTAT  | 0   | 13  | RDR2-sensitive |
| AAGTAGAGTGGAGAGTAGACGCAT  | 0   | 10  | RDR2-sensitive |
| AAGTAGATCTTGAAGATGGATGAC  | 22  | 2   | RDR2-resistant |
| AAGTAGATTACATCGGATATGACT  | 18  | 0   | RDR2-resistant |
| AAGTAGGGCTGATTCGGTGACCAG  | 0   | 37  | RDR2-sensitive |
| AAGTAGTAGTAGAGATATGTACAT  | 0   | 23  | RDR2-sensitive |
| AAGTAGTAGTGTGGCACTCAGCAT  | 0   | 21  | RDR2-sensitive |
| AAGTAGTGGATTGGGCATGTTCGT  | 10  | 54  | RDR2-sensitive |
| AAGTAGTCTGCAGGATGGAGGCG   | 17  | 0   | RDR2-resistant |
| AAGTATAGGGCAAATGACATAATA  | 16  | 0   | RDR2-resistant |
| AAGTATATGGTGGCTTTACTC     | 160 | 0   | RDR2-resistant |
| AAGTATCAGACTGTTCTTAGGCCG  | 0   | 21  | RDR2-sensitive |
| AAGTATGAGGATGTGTATTGATTA  | 24  | 3   | RDR2-resistant |
| AAGTATGATGGGCTGATTCGGTAC  | 0   | 12  | RDR2-sensitive |

|                            |     |    |                |
|----------------------------|-----|----|----------------|
| AAGTATGTTATTGCGTCGTACATA   | 63  | 3  | RDR2-resistant |
| AAGTATTAGACTATGTAACATATT   | 32  | 4  | RDR2-resistant |
| AAGTATTAGGGTAGAGGCCGGACA   | 0   | 29 | RDR2-sensitive |
| AAGTATTTGCTATATGTTCCGGACG  | 49  | 0  | RDR2-resistant |
| AAGTCAATAGTGTAGACCATGGCA   | 0   | 13 | RDR2-sensitive |
| AAGTCAATTCATCTTTAAGTCGGT   | 6   | 24 | RDR2-sensitive |
| AAGTCAGACTGAGGATGTGGTGTC   | 0   | 11 | RDR2-sensitive |
| AAGTCATTCTATCTTTAAGTCGGT   | 2   | 15 | RDR2-sensitive |
| AAGTCATTTTCATCTTTAAGTCGGT  | 2   | 24 | RDR2-sensitive |
| AAGTCCTCTGTCCGGCAGCGAAC    | 0   | 10 | RDR2-sensitive |
| AAGTCGAAGACAGCATGTAGGGAC   | 0   | 18 | RDR2-sensitive |
| AAGTCGTGGGAATAATGTGGCAT    | 0   | 11 | RDR2-sensitive |
| AAGTCGTTGAACTGCTATCGGCAC   | 0   | 22 | RDR2-sensitive |
| AAGTCTACATCGGTACTIONGCGGCT | 21  | 0  | RDR2-resistant |
| AAGTCTAGACGCTTCGAACAACCTT  | 1   | 25 | RDR2-sensitive |
| AAGTCTAGATTGTATCGATGCGTA   | 0   | 9  | RDR2-sensitive |
| AAGTCTAGGCTGGAACGACCCGGC   | 0   | 11 | RDR2-sensitive |
| AAGTCTCCTTAGGCTAGTCCGGAT   | 0   | 19 | RDR2-sensitive |
| AAGTCTGCATGATACTGATGGTTG   | 1   | 21 | RDR2-sensitive |
| AAGTCTGTATGATACTGATGGTTG   | 1   | 13 | RDR2-sensitive |
| AAGTCTGTGAGCCAGGGTGGACGA   | 0   | 9  | RDR2-sensitive |
| AAGTGAACATGTAGGCCGCGGCTGA  | 0   | 20 | RDR2-sensitive |
| AAGTGAAGACGGAGCCAGCAACGT   | 2   | 20 | RDR2-sensitive |
| AAGTGACCTGACCCGACCTGGCAT   | 0   | 9  | RDR2-sensitive |
| AAGTGACGGCACGGCACGGCTCGA   | 0   | 9  | RDR2-sensitive |
| AAGTGACGGTGACAGAGCCTTTGC   | 0   | 18 | RDR2-sensitive |
| AAGTGACGGTGACGGATCCTTTGC   | 2   | 58 | RDR2-sensitive |
| AAGTGACGGTGACGGATGCTTTGC   | 0   | 11 | RDR2-sensitive |
| AAGTGAATATATATGCAGAAAG     | 23  | 1  | RDR2-resistant |
| AAGTGAATATATATAGGATGGCCTA  | 0   | 11 | RDR2-sensitive |
| AAGTGAGCCTCTAAGTTCTGGCAT   | 25  | 0  | RDR2-resistant |
| AAGTGAGTTTGTATGAGTGAGGTT   | 44  | 0  | RDR2-resistant |
| AAGTGATAACTGTGGCAACATAAG   | 20  | 0  | RDR2-resistant |
| AAGTGATCCTGTTGACCGTTGTTC   | 123 | 9  | RDR2-resistant |
| AAGTGATGGTAGCGTACTAGACAT   | 0   | 10 | RDR2-sensitive |
| AAGTGATTAATATGTGATGTGGAC   | 45  | 5  | RDR2-resistant |
| AAGTGCGACGGATAGCGGTGGCGT   | 0   | 9  | RDR2-sensitive |
| AAGTGCGCGGACGGCTTCCAGCGG   | 0   | 12 | RDR2-sensitive |
| AAGTGCGCTGTAGGCCGAGAGGCT   | 0   | 12 | RDR2-sensitive |
| AAGTGCGGCTGAACCGGATGGCAC   | 0   | 17 | RDR2-sensitive |
| AAGTGCTAGACGCAGGACACTCAA   | 0   | 12 | RDR2-sensitive |
| AAGTGCTCTGTGGCCTGAGGGGTT   | 0   | 11 | RDR2-sensitive |
| AAGTGGACTCATCGCTGTCGTCGT   | 2   | 14 | RDR2-sensitive |
| AAGTGGAGGACCCTAGACTAAAAT   | 26  | 0  | RDR2-resistant |
| AAGTGGGAGTGGAGCTTTTCCGGC   | 0   | 14 | RDR2-sensitive |
| AAGTGGGCAGTGAACGAGCGTCAC   | 0   | 13 | RDR2-sensitive |
| AAGTGGGGGAGGAGTAGGAGCGCA   | 35  | 0  | RDR2-resistant |
| AAGTGTAGACGTGGGCTTCCGGCAT  | 0   | 17 | RDR2-sensitive |
| AAGTGTAGCTCTACGAACGGCGAT   | 0   | 10 | RDR2-sensitive |

|                           |     |    |                |
|---------------------------|-----|----|----------------|
| AAGTGTAGCTCTATGGACGGTGAT  | 0   | 11 | RDR2-sensitive |
| AAGTGTAGCTCTGCGGACGGTGAT  | 0   | 40 | RDR2-sensitive |
| AAGTGTATCTCTGCGGACGACGAT  | 2   | 45 | RDR2-sensitive |
| AAGTGTATCTCTGCGGTCCGGTGAT | 5   | 19 | RDR2-sensitive |
| AAGTGTTGGAAGTGTATTAGGGTT  | 1   | 81 | RDR2-sensitive |
| AAGTGTTGGACTAGCACGGCCAGA  | 0   | 9  | RDR2-sensitive |
| AAGTGTTTTGGTTAGATGGAATAGG | 46  | 0  | RDR2-resistant |
| AAGTGTTTTTTGGAGTAGGACGGT  | 0   | 12 | RDR2-sensitive |
| AAGTTAATTGTTTTGGTTGTCTGG  | 3   | 22 | RDR2-sensitive |
| AAGTTACGGAGAGCTGACGTCATG  | 36  | 0  | RDR2-resistant |
| AAGTTAGCGCTGTGTGACGGTGAA  | 0   | 26 | RDR2-sensitive |
| AAGTTATCTATGTTTCGATCGGGC  | 0   | 9  | RDR2-sensitive |
| AAGTTATGGACTGACGGTTGGTCG  | 0   | 10 | RDR2-sensitive |
| AAGTTCCGGCGGCTCTGGGACGGT  | 0   | 22 | RDR2-sensitive |
| AAGTTCCGACGGTACCCACGTTCTT | 0   | 9  | RDR2-sensitive |
| AAGTTCCGCGACTGACAGACGGACG | 0   | 19 | RDR2-sensitive |
| AAGTTCCGCTGACTGCAGAGGACAA | 0   | 11 | RDR2-sensitive |
| AAGTTCCGTGGACCTAAGTGGCATT | 18  | 0  | RDR2-resistant |
| AAGTTCTAACAGACTGTCCGTCGG  | 0   | 9  | RDR2-sensitive |
| AAGTTGAATTCGGTCTCGGTTGGT  | 0   | 10 | RDR2-sensitive |
| AAGTTGACGTAGGCAAGAGGGTGC  | 119 | 4  | RDR2-resistant |
| AAGTTGACTGGGAGACGACGGCCT  | 6   | 25 | RDR2-sensitive |
| AAGTTGAGATACAGAATAGCGGAA  | 21  | 0  | RDR2-resistant |
| AAGTTGCAGTAGCCGGAACAAGAT  | 0   | 9  | RDR2-sensitive |
| AAGTTGCTCGGACAGCGTCCGCAA  | 75  | 22 | RDR2-resistant |
| AAGTTGCTTAGACTGTACAACGGC  | 1   | 12 | RDR2-sensitive |
| AAGTTGGAAGTATGCTTTTATGTC  | 50  | 0  | RDR2-resistant |
| AAGTTGGAATGAACAGTTTGACGT  | 49  | 7  | RDR2-resistant |
| AAGTTGGACGGTTTTATACAGTAC  | 0   | 11 | RDR2-sensitive |
| AAGTTGGATCCAGACGACATGACA  | 128 | 0  | RDR2-resistant |
| AAGTTGGCATTGCAGTAGACCGGA  | 0   | 10 | RDR2-sensitive |
| AAGTTGGCTGCGAGCATACAGTTC  | 0   | 18 | RDR2-sensitive |
| AAGTTGGTAACGTGTTGGAGGCTT  | 0   | 12 | RDR2-sensitive |
| AAGTTGGTAAGGTGTTGGAGGCTT  | 22  | 0  | RDR2-resistant |
| AAGTTGTATGTTTGGATGTGCATG  | 69  | 0  | RDR2-resistant |
| AAGTTGTATTGAAGGGCAAGCCAC  | 32  | 1  | RDR2-resistant |
| AAGTTTAGATCGTGCCGACGGTGC  | 249 | 27 | RDR2-resistant |
| AAGTTTATCTCTGACGGCTTCCTA  | 0   | 9  | RDR2-sensitive |
| AAGTTTCGAACTTGTCTTGTCTGT  | 27  | 0  | RDR2-resistant |
| AAGTTTCTACTATCGTTGTGCGTC  | 0   | 9  | RDR2-sensitive |
| AAGTTTGCGACTCGGACAGGCCTA  | 0   | 20 | RDR2-sensitive |
| AAGTTTGTAGCACGGGTGACAAGG  | 23  | 1  | RDR2-resistant |
| AAGTTTGTCTAGTCGTTGGTGTCTG | 1   | 29 | RDR2-sensitive |
| AAGTTTGTGGCTGAGTCGGCTTG   | 0   | 16 | RDR2-sensitive |
| AAGTTTTGGAGAGCTGACGTCATG  | 23  | 0  | RDR2-resistant |
| AAGTTTTGGAGCGCTGACGTCATG  | 38  | 0  | RDR2-resistant |
| AATAAAAAGGTATTGTGTCGTTGT  | 16  | 0  | RDR2-resistant |
| AATAAAACTAGGACAGAACGGCTC  | 0   | 10 | RDR2-sensitive |
| AATAAAACTGGGACAGAACGGCTC  | 0   | 15 | RDR2-sensitive |



|                           |    |     |                |
|---------------------------|----|-----|----------------|
| AATAAACCCGGGCTGTGTCGGCAC  | 1  | 20  | RDR2-sensitive |
| AATAAACGGCTACTGTTTTCGGCG  | 0  | 10  | RDR2-sensitive |
| AATAAATACTCTGATTATTGTGAC  | 2  | 14  | RDR2-sensitive |
| AATAACAACCTTGTGCTGATTGGAT | 21 | 0   | RDR2-resistant |
| AATAACACAACCGAGCTCGGCGCC  | 1  | 24  | RDR2-sensitive |
| AATAACGTTAAAAGTAGTGGTATT  | 20 | 0   | RDR2-resistant |
| AATAACTGTAGAATGTACGGTTAG  | 0  | 11  | RDR2-sensitive |
| AATAACTGTATAAATGGACGGTTG  | 0  | 13  | RDR2-sensitive |
| AATAAGCTGGACTGGGCACAGCAC  | 0  | 12  | RDR2-sensitive |
| AATAAGGTCGATGTGGAGCGCAGC  | 14 | 0   | RDR2-resistant |
| AATAAGTAGTAGAGACTTGTGCAT  | 0  | 10  | RDR2-sensitive |
| AATAAGTTGTTATTTTCGTCGGTC  | 0  | 30  | RDR2-sensitive |
| AATAATAAAGCAGAGGACTAGATT  | 19 | 0   | RDR2-resistant |
| AATAATCATGTCGGACCGGCCAC   | 0  | 9   | RDR2-sensitive |
| AATAATCGTGTCGGATCGGCCAC   | 0  | 16  | RDR2-sensitive |
| AATAATCGTGTCGGGCCGGGCCAC  | 0  | 16  | RDR2-sensitive |
| AATAATCTGTTATTTTCGGCGGCC  | 0  | 10  | RDR2-sensitive |
| AATAATGACTTTGGACAGACGTTT  | 0  | 10  | RDR2-sensitive |
| AATAATTTGGACTGGTGGGAGGGC  | 1  | 27  | RDR2-sensitive |
| AATAATTTGTTGTGTCGATCGGAG  | 33 | 0   | RDR2-resistant |
| AATACAAATTGTAAGTAATGCGTT  | 27 | 3   | RDR2-resistant |
| AATACCAATTATGTCGGATGTAAG  | 27 | 0   | RDR2-resistant |
| AATACCCACGGGTACGGTCGCGGA  | 1  | 36  | RDR2-sensitive |
| AATACCCTTATTTACGACGTCGGC  | 0  | 12  | RDR2-sensitive |
| AATACGAAAGGTATTTTCGTCGGC  | 0  | 12  | RDR2-sensitive |
| AATACGAAATAGACTGGACTGCTA  | 0  | 10  | RDR2-sensitive |
| AATACGGGCCTTTTCGGGCTTGGG  | 0  | 13  | RDR2-sensitive |
| AATACGTACGTAGGACAGGCCGGT  | 0  | 9   | RDR2-sensitive |
| AATACGTCGGGTAGGGTACGGATA  | 0  | 11  | RDR2-sensitive |
| AATACTACGCAGATCACGGATGTC  | 0  | 9   | RDR2-sensitive |
| AATACTGGGCTGCAGATGGGGCAT  | 0  | 9   | RDR2-sensitive |
| AATACTGTAGAAGCCGCAGCCGCA  | 0  | 183 | RDR2-sensitive |
| AATACTGTAGATGGCGTTGTTTGA  | 0  | 16  | RDR2-sensitive |
| AATACTGTTTCATGTTGTAGAGGCT | 0  | 15  | RDR2-sensitive |
| AATACTGTTTATTTTCTTCGTC    | 29 | 0   | RDR2-resistant |
| AATACTTTTTCTCGGACAGTCGGT  | 0  | 10  | RDR2-sensitive |
| AATAGAACAGTAGTAGCTTGTGCA  | 65 | 6   | RDR2-resistant |
| AATAGACTCGGAACGGACGGGCTC  | 0  | 12  | RDR2-sensitive |
| AATAGACTGGCTTCGAATTGGCTT  | 0  | 9   | RDR2-sensitive |
| AATAGATGGCACAGTAGACGTCTC  | 0  | 12  | RDR2-sensitive |
| AATAGCTTGTAAGTAGTTGGCAG   | 0  | 9   | RDR2-sensitive |
| AATAGGGCACTGTGGCATAGATAA  | 0  | 12  | RDR2-sensitive |
| AATAGGTAGGACGGCGCGGCTGCT  | 37 | 2   | RDR2-resistant |
| AATAGGTAGTATAGATTCGATCGA  | 0  | 9   | RDR2-sensitive |
| AATAGGTGGACTGGCTGAGGACGA  | 0  | 9   | RDR2-sensitive |
| AATAGTACTCGGCAAAGAGGCTGT  | 0  | 12  | RDR2-sensitive |
| AATAGTCCGGACACGTGGTGGCGC  | 0  | 13  | RDR2-sensitive |
| AATAGTCTTTTCTGTAATGACGGT  | 0  | 24  | RDR2-sensitive |
| AATAGTGCCGGGCTGGGCATGACA  | 0  | 16  | RDR2-sensitive |

|                           |      |     |                |
|---------------------------|------|-----|----------------|
| AATAGTGTGTTGTTTGGACCAGTA  | 0    | 9   | RDR2-sensitive |
| AATAGTTAGTAGAGATTGGACGGT  | 0    | 11  | RDR2-sensitive |
| AATAGTTGTAGAGATGTGCCACTT  | 0    | 14  | RDR2-sensitive |
| AATATAAGTGTTGGACTAGCACGG  | 0    | 30  | RDR2-sensitive |
| AATATAGAGGACGTTGCTGGAGAC  | 0    | 9   | RDR2-sensitive |
| AATATATTCAAATGGGTCGTCGTG  | 2    | 31  | RDR2-sensitive |
| AATATATTCAAATGGGTCGTTGTG  | 0    | 21  | RDR2-sensitive |
| AATATCCCTGCAGCGGTGGACTGT  | 1    | 36  | RDR2-sensitive |
| AATATCCGAGGGCTGGGAGGCCGA  | 0    | 10  | RDR2-sensitive |
| AATATCGCATCTGTTTCGTCGGTC  | 2    | 34  | RDR2-sensitive |
| AATATCGGGAGGACGGTCTGTCTC  | 0    | 11  | RDR2-sensitive |
| AATATCGGTTCTCTGCGTCGGTT   | 0    | 14  | RDR2-sensitive |
| AATATCGTGCTGTGTCCGCGTCAT  | 0    | 26  | RDR2-sensitive |
| AATATCGTGTCGGGTTAGACTGGC  | 0    | 13  | RDR2-sensitive |
| AATATCTGATCTGTTAGATGGTCT  | 1590 | 0   | RDR2-resistant |
| AATATGATATTGATTGTGGCGATG  | 19   | 0   | RDR2-resistant |
| AATATGCTGGAGCGGTATTACTCA  | 17   | 0   | RDR2-resistant |
| AATATGGCTGCAGATTAGGTGCAA  | 0    | 9   | RDR2-sensitive |
| AATATGTCTAGATTGTATCGGTGC  | 0    | 12  | RDR2-sensitive |
| AATATGTCTTGTITTTGTGGATGCT | 24   | 0   | RDR2-resistant |
| AATATGTGGATACTCGGCTATAAG  | 30   | 0   | RDR2-resistant |
| AATATTAGCAACGGACGGTCGGTC  | 1    | 18  | RDR2-sensitive |
| AATATTAGTAAGCAGACTGTCATG  | 58   | 4   | RDR2-resistant |
| AATATTAGTACTCGTTGGCTCGGC  | 0    | 11  | RDR2-sensitive |
| AATATTATGTACGGCTATTGAACT  | 34   | 2   | RDR2-resistant |
| AATATTCTGTCTGATTGGTTCGGT  | 0    | 26  | RDR2-sensitive |
| AATATTGTGTGACTCGAGATTAAG  | 14   | 0   | RDR2-resistant |
| AATATTTTACTGTTCGGACCGGTAC | 0    | 24  | RDR2-sensitive |
| AATCAAACCTCGTCTCGGCTCGGCT | 0    | 12  | RDR2-sensitive |
| AATCAACAGTGGTCGTCACGTGCA  | 0    | 24  | RDR2-sensitive |
| AATCAACAGTGTCTGACGTGAGGC  | 18   | 1   | RDR2-resistant |
| AATCACGGACGGTTATTATATGTA  | 0    | 10  | RDR2-sensitive |
| AATCACGTCGATGCTTAGGAGGCT  | 17   | 0   | RDR2-resistant |
| AATCACTTGAACATGGTTCGACGGC | 0    | 43  | RDR2-sensitive |
| AATCACTTGAACATGGTTCGACGGT | 1    | 18  | RDR2-sensitive |
| AATCAGACGAACACAGCACACAC   | 0    | 12  | RDR2-sensitive |
| AATCAGACTCTGCATATGTATTGA  | 0    | 21  | RDR2-sensitive |
| AATCAGGAGCTGGAGCTGTGCCAA  | 0    | 10  | RDR2-sensitive |
| AATCAGGAGTAGTGATGGTTAATG  | 0    | 10  | RDR2-sensitive |
| AATCAGGGCATGGCACTACATACA  | 0    | 11  | RDR2-sensitive |
| AATCATAGACACAGACGGTCCCAC  | 0    | 10  | RDR2-sensitive |
| AATCATATTTGTGAGGATCTTCGG  | 0    | 10  | RDR2-sensitive |
| AATCATCATCATCTGATCTGCGGT  | 19   | 1   | RDR2-resistant |
| AATCATGTAGATGGTGTAAATGCT  | 94   | 2   | RDR2-resistant |
| AATCATGTTTTTGAGGACCTTCGG  | 3    | 22  | RDR2-sensitive |
| AATCATGTTTTTGAGGATCTTCGG  | 0    | 24  | RDR2-sensitive |
| AATCATTGTTGGATCAAAGGGCAT  | 18   | 0   | RDR2-resistant |
| AATCCACATGGATTGAGAGCGAAC  | 0    | 9   | RDR2-sensitive |
| AATCCACATGGATTGAGAGCTAAC  | 6    | 416 | RDR2-sensitive |

|                           |     |    |                |
|---------------------------|-----|----|----------------|
| AATCCACCGTAGTCAGGACGTCAT  | 0   | 9  | RDR2-sensitive |
| AATCCACTGTAGTCAGACCGTCAC  | 0   | 13 | RDR2-sensitive |
| AATCCACTGTATGGCTTCGGCGGC  | 119 | 8  | RDR2-resistant |
| AATCCAGGGCTGCTGTGAAGACGA  | 0   | 12 | RDR2-sensitive |
| AATCCATATGGATTGAGAGCTAAC  | 1   | 89 | RDR2-sensitive |
| AATCCATATGGATTGAGAGCTGAC  | 0   | 16 | RDR2-sensitive |
| AATCCATATGGATTGGGGTAGAAC  | 0   | 30 | RDR2-sensitive |
| AATCCATTCTTGGATTGCTCACTG  | 31  | 3  | RDR2-resistant |
| AATCCGACTGCGGCTGCGGCTTCT  | 7   | 60 | RDR2-sensitive |
| AATCCGGACGGATAAGAAACGGAT  | 0   | 9  | RDR2-sensitive |
| AATCCGGACGGTAAGAAACGGAT   | 4   | 57 | RDR2-sensitive |
| AATCCGGACGTCGGGTGGAAGCGG  | 0   | 13 | RDR2-sensitive |
| AATCCGGACTGGGTTGACATGGCC  | 0   | 24 | RDR2-sensitive |
| AATCCGGCTAGGAATCGTTCCGAC  | 1   | 44 | RDR2-sensitive |
| AATCCGGCTATGAATCGTTCCGAC  | 0   | 9  | RDR2-sensitive |
| AATCCGGCTGCGGCTGCGGCTTCT  | 1   | 15 | RDR2-sensitive |
| AATCCGGCTGTGGCTTCTACGGTA  | 0   | 10 | RDR2-sensitive |
| AATCCGGTTAGGAATCGTTCCGAC  | 0   | 18 | RDR2-sensitive |
| AATCCGGTTAGGAATCGTTCCGAT  | 0   | 28 | RDR2-sensitive |
| AATCCGGTTAGGAATCGTTCTGAC  | 1   | 67 | RDR2-sensitive |
| AATCCGGTTCGAAATCGTTCTGAC  | 0   | 10 | RDR2-sensitive |
| AATCCGTGTCTACTCTGTGATTGA  | 0   | 11 | RDR2-sensitive |
| AATCCGTGTGATTGGACGTCTGCA  | 0   | 9  | RDR2-sensitive |
| AATCGAACACGGACTGTCCGGCCA  | 0   | 9  | RDR2-sensitive |
| AATCGAATCGGACAGGTGCGACAT  | 0   | 9  | RDR2-sensitive |
| AATCGACGGATTTGGCTTCGGCTC  | 2   | 23 | RDR2-sensitive |
| AATCGACTCAGACGGAGACTACTAC | 8   | 29 | RDR2-sensitive |
| AATCGACTGTCCGGAATACCGTAG  | 0   | 16 | RDR2-sensitive |
| AATCGATCTGGACCGTCCGTGGCA  | 0   | 9  | RDR2-sensitive |
| AATCGATGTGTAGTGTGATGGTCT  | 161 | 0  | RDR2-resistant |
| AATCGCAGGCGTGGAGAAGGCTAG  | 1   | 14 | RDR2-sensitive |
| AATCGCCCCTGGACGGTCGCGGAC  | 59  | 3  | RDR2-resistant |
| AATCGCGCGATGGCAGAACAGGGC  | 0   | 9  | RDR2-sensitive |
| AATCGGACACGGATAGCGTCGGTA  | 0   | 9  | RDR2-sensitive |
| AATCGGACCGTATCAAGGTCGGTG  | 1   | 13 | RDR2-sensitive |
| AATCGGACCGTGCCCGTGTCCGGCC | 0   | 17 | RDR2-sensitive |
| AATCGGACGGTCGAGATAGTGGCG  | 0   | 44 | RDR2-sensitive |
| AATCGGACGGTCGGGATAGTGGCG  | 0   | 10 | RDR2-sensitive |
| AATCGGAGTTCGGATACATTCTAG  | 0   | 13 | RDR2-sensitive |
| AATCGGATCGTGTGCGGGCCGGCAC | 0   | 10 | RDR2-sensitive |
| AATCGGCCAGGTCGACGACGCGAT  | 0   | 25 | RDR2-sensitive |
| AATCGGCTCCTGAACGAGGCTGCA  | 1   | 15 | RDR2-sensitive |
| AATCGGGCCAAGGCACAACAGGAT  | 1   | 12 | RDR2-sensitive |
| AATCGGGCCACCAAGTCACGGGCAT | 0   | 14 | RDR2-sensitive |
| AATCGGGCCCGGCTGTCTAGGCAC  | 0   | 10 | RDR2-sensitive |
| AATCGGGCCGTTGACACATGGCAT  | 0   | 15 | RDR2-sensitive |
| AATCGGGCCGGTAGAACGCGGATA  | 0   | 28 | RDR2-sensitive |
| AATCGGGCCGGTAGTACACGGATA  | 0   | 23 | RDR2-sensitive |
| AATCGGGTGGGTAGTACGCGGATA  | 0   | 17 | RDR2-sensitive |

|                           |     |     |                |
|---------------------------|-----|-----|----------------|
| AATCGGTACGACTCATGACGGGCT  | 0   | 11  | RDR2-sensitive |
| AATCGGTCGTGTATTTAGTCGGTC  | 0   | 9   | RDR2-sensitive |
| AATCGGTGCATGTGCGCGGTA     | 0   | 10  | RDR2-sensitive |
| AATCGGTTATACGATAACGGTCGG  | 1   | 13  | RDR2-sensitive |
| AATCGGTTGGAGCGCGTGGAGCGG  | 0   | 9   | RDR2-sensitive |
| AATCGTAATCGGATACTGTCCGGC  | 0   | 10  | RDR2-sensitive |
| AATCGTGCCAGGCCTGGACCGCAT  | 0   | 12  | RDR2-sensitive |
| AATCGTGCTGTACCGACATTATAC  | 0   | 10  | RDR2-sensitive |
| AATCGTGCTGTCTAGACGCTTCAG  | 0   | 9   | RDR2-sensitive |
| AATCGTGGCTGAGTGAGGGCGGGC  | 0   | 18  | RDR2-sensitive |
| AATCGTTCGTCTGACTTGGGTATA  | 113 | 34  | RDR2-resistant |
| AATCGTTCGTTGGCAGAAGGCCAT  | 0   | 10  | RDR2-sensitive |
| AATCTAACTCTGGAGCAGAGCTG   | 1   | 48  | RDR2-sensitive |
| AATCTAATCTCGGGACACGCGGAC  | 3   | 106 | RDR2-sensitive |
| AATCTAATTGTGGGCTGGGCCGG   | 0   | 19  | RDR2-sensitive |
| AATCTAATTGTGGGTCTGGGCCGG  | 0   | 12  | RDR2-sensitive |
| AATCTACTTTCTGTTCGTCCGGTTC | 0   | 44  | RDR2-sensitive |
| AATCTAGATTTGAGGCTTACTGT   | 1   | 17  | RDR2-sensitive |
| AATCTATACAGTCGTCCGGAGGCT  | 0   | 15  | RDR2-sensitive |
| AATCTATGGGACAGTAGTGGTATG  | 0   | 12  | RDR2-sensitive |
| AATCTATTTGATGTTGAATACGGT  | 14  | 0   | RDR2-resistant |
| AATCTCGGGGCTGGGTGGAGGGCA  | 0   | 10  | RDR2-sensitive |
| AATCTCGGTGAACTGTACATTGGC  | 0   | 42  | RDR2-sensitive |
| AATCTCTGAACCAGACGTGGTGAT  | 3   | 22  | RDR2-sensitive |
| AATCTCTGACTGCGAAGATCGACA  | 0   | 22  | RDR2-sensitive |
| AATCTGCACAAGTACTACAGGTAT  | 17  | 0   | RDR2-resistant |
| AATCTGCATAGTCGTCCGGTAGGCC | 0   | 14  | RDR2-sensitive |
| AATCTGCTAGCCGTATTTCTGAAT  | 25  | 2   | RDR2-resistant |
| AATCTGGAACGGAGCGGCTCTGTT  | 6   | 46  | RDR2-sensitive |
| AATCTGGACAAATAAGCTAGACTG  | 0   | 13  | RDR2-sensitive |
| AATCTGGACCGTAGTACCGGCTGT  | 0   | 10  | RDR2-sensitive |
| AATCTGGACGTGGCCCAACGGTAC  | 0   | 11  | RDR2-sensitive |
| AATCTGGCTGTAGGGAGAATCCGG  | 0   | 57  | RDR2-sensitive |
| AATCTGGGCGCAAGAACGGCTCCT  | 0   | 9   | RDR2-sensitive |
| AATCTGTACAGTCGTCCGAGAGGCC | 0   | 15  | RDR2-sensitive |
| AATCTGTACAGTCGTCCGAGATGCT | 0   | 12  | RDR2-sensitive |
| AATCTGTACAGTCGTCCGGAGGCC  | 0   | 28  | RDR2-sensitive |
| AATCTGTACAGTCGTCCGGAGGCT  | 0   | 38  | RDR2-sensitive |
| AATCTGTACAGTCGTCCGTGAGGCC | 0   | 10  | RDR2-sensitive |
| AATCTGTAGGATAGTATGGTCAAGC | 0   | 25  | RDR2-sensitive |
| AATCTGTATCGACTCTTACCGGTG  | 1   | 12  | RDR2-sensitive |
| AATCTGTTGGACGGCTACATCCGC  | 0   | 19  | RDR2-sensitive |
| AATCTTAAGGATGGTGCCTCGTAG  | 33  | 3   | RDR2-resistant |
| AATCTTATCTCGGGACACGCGGAC  | 0   | 11  | RDR2-sensitive |
| AATCTTATTGGTTGGGTCTTCGGT  | 0   | 11  | RDR2-sensitive |
| AATCTTATTTGAGAGATCGTCCTA  | 0   | 15  | RDR2-sensitive |
| AATCTTATTTGAGGGATCGTCTCA  | 0   | 11  | RDR2-sensitive |
| AATCTTATTTGATGGATCGTCTCA  | 0   | 15  | RDR2-sensitive |
| AATCTTCTCTGTATCGTTCCAATT  | 25  | 0   | RDR2-resistant |

|                           |     |    |                |
|---------------------------|-----|----|----------------|
| AATCTTGGCCGGCTGGAGATGGAG  | 2   | 19 | RDR2-sensitive |
| AATCTTGGCCTTTGAACTTACGGT  | 0   | 14 | RDR2-sensitive |
| AATCTTGTATTGTTTGAATTCGG   | 0   | 9  | RDR2-sensitive |
| AATCTTTGTCTTGCTGTCGTCGTT  | 0   | 11 | RDR2-sensitive |
| AATCTTTTAGAGAAGACTGTAAAG  | 0   | 25 | RDR2-sensitive |
| AATCTTTTAGAGGAGACTGTAAAG  | 0   | 10 | RDR2-sensitive |
| AATGAACAGTTTGACGTTAGTATA  | 65  | 5  | RDR2-resistant |
| AATGAACCCAAGCTGAGGCTCTTC  | 0   | 17 | RDR2-sensitive |
| AATGAACTAGAGGGCATGAGCCAA  | 3   | 17 | RDR2-sensitive |
| AATGAACTTCGGACGAAGGCCATG  | 0   | 10 | RDR2-sensitive |
| AATGAAGACCGTTGGTGGGCATGT  | 20  | 0  | RDR2-resistant |
| AATGAAGGACTGCCACACGCGCGC  | 0   | 10 | RDR2-sensitive |
| AATGACAGATGTTGGAATTGTTCT  | 38  | 0  | RDR2-resistant |
| AATGACAGGACGGGACGATACCTC  | 0   | 9  | RDR2-sensitive |
| AATGACAGGACGGGATGGGACGGG  | 3   | 22 | RDR2-sensitive |
| AATGACAGGACGGGATGGGATGGA  | 0   | 9  | RDR2-sensitive |
| AATGACATGTAGGGTCCATGGTAT  | 0   | 14 | RDR2-sensitive |
| AATGACATGTAGGGTTCATGGTAT  | 0   | 10 | RDR2-sensitive |
| AATGACATGTGGGATCAGTGGCAA  | 0   | 21 | RDR2-sensitive |
| AATGACATGTGGGATCCATGGTAT  | 0   | 9  | RDR2-sensitive |
| AATGACATGTGGGATCTATGGTAT  | 0   | 19 | RDR2-sensitive |
| AATGACATGTGGGGTCCATGGTAT  | 0   | 23 | RDR2-sensitive |
| AATGACCACTCGCCATCGTCGGGG  | 12  | 47 | RDR2-sensitive |
| AATGACCGTCAACTATAGAAGGCT  | 2   | 27 | RDR2-sensitive |
| AATGACCTGCAGAATTGATGGTAT  | 0   | 9  | RDR2-sensitive |
| AATGACGACGTACATCTCTTATGT  | 23  | 0  | RDR2-resistant |
| AATGACGCTTGTCGTGGGACACTC  | 30  | 0  | RDR2-resistant |
| AATGACTATAAAATCTGATGGCAT  | 0   | 17 | RDR2-sensitive |
| AATGACTGTAACTCTTGTAGTGGC  | 0   | 15 | RDR2-sensitive |
| AATGACTGTCAGCTAGTAACGGAC  | 0   | 9  | RDR2-sensitive |
| AATGACTTGGACTTGAGGGGTCGG  | 0   | 10 | RDR2-sensitive |
| AATGAGAAAGTTCTTCTCCTAAG   | 18  | 0  | RDR2-resistant |
| AATGAGAACTTTGAAGGCCGAAGA  | 20  | 1  | RDR2-resistant |
| AATGAGACTCGGAGGCAGACCAAA  | 32  | 0  | RDR2-resistant |
| AATGAGATATTGTTTGATTGTTGT  | 0   | 10 | RDR2-sensitive |
| AATGAGCCAGTGA CTGATTTTACT | 19  | 1  | RDR2-resistant |
| AATGAGCTATTGTTTGATTGTTGT  | 0   | 9  | RDR2-sensitive |
| AATGAGTAGAGGACGTTCTGATCC  | 0   | 9  | RDR2-sensitive |
| AATGAGTCTGGATTGGAATCGGTT  | 0   | 11 | RDR2-sensitive |
| AATGAGTTGATTTGTAAGTTCGGT  | 20  | 0  | RDR2-resistant |
| AATGAGTTTCGGACGAAGGTCATA  | 0   | 14 | RDR2-sensitive |
| AATGATAAGTAGAATTGATTGGAT  | 0   | 9  | RDR2-sensitive |
| AATGATAATGATCGAGCGATGACA  | 268 | 17 | RDR2-resistant |
| AATGATAGATTGTAATTGCGGCCT  | 17  | 0  | RDR2-resistant |
| AATGATATTGTGTTGGACATTCAA  | 0   | 9  | RDR2-sensitive |
| AATGATCAGTTGTTTCTGTTGGC   | 36  | 0  | RDR2-resistant |
| AATGATCGAGCGATGACATTTATT  | 449 | 23 | RDR2-resistant |
| AATGATCGGTTCCGGCTTGGGTCGG | 1   | 19 | RDR2-sensitive |
| AATGATCTAGGATCTGCTTCCGGT  | 0   | 15 | RDR2-sensitive |

|                           |     |     |                |
|---------------------------|-----|-----|----------------|
| AATGATCTCCGGACGAAGGTCATG  | 0   | 9   | RDR2-sensitive |
| AATGATGACTTTGAGTGGACGTTT  | 0   | 25  | RDR2-sensitive |
| AATGATGTCTGTATCACTGTCGGT  | 0   | 21  | RDR2-sensitive |
| AATGATGTGGCTCTCTAGCTCGGC  | 0   | 12  | RDR2-sensitive |
| AATGATTGAGAACGAGATGACTGC  | 0   | 17  | RDR2-sensitive |
| AATGATTTACACTCGAATGTCGGT  | 0   | 9   | RDR2-sensitive |
| AATGATTTGTTATTATGGTCTGAT  | 20  | 0   | RDR2-resistant |
| AATGCAAAATTTGTAGAATGGCAT  | 0   | 17  | RDR2-sensitive |
| AATGCAAGGGTAGAAGTTGGGCGC  | 0   | 16  | RDR2-sensitive |
| AATGCACGCAGAGGACCAGAATAA  | 0   | 15  | RDR2-sensitive |
| AATGCAGCGGAGGAATGTTTTTAT  | 48  | 2   | RDR2-resistant |
| AATGCAGGATTCTGGAAACGGATG  | 37  | 4   | RDR2-resistant |
| AATGCAGGCTATAGTGAGGGCGAT  | 0   | 12  | RDR2-sensitive |
| AATGCATGCGGAGGATCTGGCCAA  | 0   | 67  | RDR2-sensitive |
| AATGCATTTTGTGGATCTGAGGCC  | 0   | 18  | RDR2-sensitive |
| AATGCCCTGAATTCCTGCAGTTTC  | 19  | 0   | RDR2-resistant |
| AATGCCGGACTGGGTTTGGCATGA  | 1   | 13  | RDR2-sensitive |
| AATGCGAGGCTGAGGTATATGGCG  | 31  | 2   | RDR2-resistant |
| AATGCGGGAGTTTGGCTACTGTAT  | 0   | 22  | RDR2-sensitive |
| AATGCTAGCACACTGACGTCACGA  | 0   | 20  | RDR2-sensitive |
| AATGCTCCTGCGATTCCGGTCGGTC | 1   | 19  | RDR2-sensitive |
| AATGCTCCTGCGATTTGGTCCGTT  | 0   | 10  | RDR2-sensitive |
| AATGCTCTAGACTGTTATTGGCAT  | 1   | 29  | RDR2-sensitive |
| AATGCTCTCGCGGAAGTCGTCTGT  | 0   | 11  | RDR2-sensitive |
| AATGCTCTGATTGGTACAATGAAT  | 0   | 15  | RDR2-sensitive |
| AATGCTGGACTTTAGATAAACGGG  | 0   | 10  | RDR2-sensitive |
| AATGCTGGTCTGCATACACTCATG  | 0   | 19  | RDR2-sensitive |
| AATGCTTCAGCGGACGAAAGGCAT  | 0   | 30  | RDR2-sensitive |
| AATGCTTCAGCGGACGAAGGGCAC  | 0   | 14  | RDR2-sensitive |
| AATGCTTCAGCGGACGAAGGGCAT  | 2   | 43  | RDR2-sensitive |
| AATGCTTCGAAGGACGAAGGGCAT  | 0   | 29  | RDR2-sensitive |
| AATGCTTCGTAGGACGAAAGGCAT  | 0   | 12  | RDR2-sensitive |
| AATGCTTGGCCGTTTCGATCGTTGG | 0   | 21  | RDR2-sensitive |
| AATGGAAAACGAAGATGGAATCAT  | 19  | 0   | RDR2-resistant |
| AATGGACAATGTTTACAGGTTCCGG | 0   | 11  | RDR2-sensitive |
| AATGGACAGTGCTGGAGGATATGA  | 0   | 13  | RDR2-sensitive |
| AATGGACAGTGTTTACAGGTTCCGG | 3   | 20  | RDR2-sensitive |
| AATGGACATAGATATTTTTACGG   | 0   | 66  | RDR2-sensitive |
| AATGGACCACCTTAGATGATCATA  | 808 | 211 | RDR2-resistant |
| AATGGACCAGATAGTTTGCTTGCA  | 0   | 61  | RDR2-sensitive |
| AATGGACCCCAACCTCGGCGTCAT  | 0   | 10  | RDR2-sensitive |
| AATGGACCCTATGCTCGGCGCCAT  | 0   | 11  | RDR2-sensitive |
| AATGGACGACAGAATCGATCGGTT  | 0   | 17  | RDR2-sensitive |
| AATGGACGAGCCGAGCCGAGCCGA  | 0   | 38  | RDR2-sensitive |
| AATGGACGGCTGAGATCGCAGAAC  | 0   | 23  | RDR2-sensitive |
| AATGGACGGCTGAGATCGCAGAAAT | 1   | 16  | RDR2-sensitive |
| AATGGACTGATATGGCTTCGGCTC  | 0   | 9   | RDR2-sensitive |
| AATGGACTGGACAGGCACGCCGCC  | 0   | 15  | RDR2-sensitive |
| AATGGACTGTGTCTGACGGCCCGG  | 0   | 15  | RDR2-sensitive |

|                           |     |     |                |
|---------------------------|-----|-----|----------------|
| AATGGACTGTTACACTACAGATGG  | 0   | 19  | RDR2-sensitive |
| AATGGACTTGGACTGGATTGGCCT  | 0   | 85  | RDR2-sensitive |
| AATGGAGTTGGTGGAGGGCGAGCT  | 18  | 1   | RDR2-resistant |
| AATGGATCAGATGGTTTGCTTGCA  | 4   | 25  | RDR2-sensitive |
| AATGGATCCTATGTCTATATCGTC  | 31  | 0   | RDR2-resistant |
| AATGGATCTGTTCTGCTTAGCCGG  | 0   | 14  | RDR2-sensitive |
| AATGGATTGAGAGCCTATTCGGTT  | 0   | 17  | RDR2-sensitive |
| AATGGATTTGCAGATTTGATGGTT  | 0   | 10  | RDR2-sensitive |
| AATGGCAGAACACTGGCAGAACAC  | 0   | 13  | RDR2-sensitive |
| AATGGCAGAGGTAGATTTGGGCAG  | 0   | 15  | RDR2-sensitive |
| AATGGCCTCGACTGCTGCTTCAAT  | 22  | 0   | RDR2-resistant |
| AATGGCGTGTCTGAGCGACGTAAT  | 30  | 0   | RDR2-resistant |
| AATGGCTATAGATATTTTTCACGG  | 0   | 26  | RDR2-sensitive |
| AATGGCTCAGGACCCTAGCGACGG  | 0   | 10  | RDR2-sensitive |
| AATGGCTCTGGCTCTTTGATGGCT  | 0   | 11  | RDR2-sensitive |
| AATGGCTGACATGACATCGACGTG  | 0   | 27  | RDR2-sensitive |
| AATGGCTGTGATTATGGCTTCGGA  | 28  | 0   | RDR2-resistant |
| AATGGCTTTGAAAAATATCGGCT   | 15  | 0   | RDR2-resistant |
| AATGGGAATGACAGAACACGGAAT  | 0   | 9   | RDR2-sensitive |
| AATGGGAATGGCAGAACACGGAAT  | 0   | 61  | RDR2-sensitive |
| AATGGGCATAGATATTTTTCACGG  | 2   | 86  | RDR2-sensitive |
| AATGGGCGACCGAACTCTCCGGCT  | 19  | 1   | RDR2-resistant |
| AATGGGCGCTGTAGGGGGCACCGC  | 2   | 23  | RDR2-sensitive |
| AATGGGCTCCGACGCGATACACGG  | 0   | 15  | RDR2-sensitive |
| AATGGGCTGGGCTGGAATGGGCTT  | 0   | 14  | RDR2-sensitive |
| AATGGGCTGTACCTGACCGGTGT   | 0   | 10  | RDR2-sensitive |
| AATGGGCTGTCTGATAGGCTTCGG  | 3   | 113 | RDR2-sensitive |
| AATGGGTTGTATATGGTTGACAGG  | 15  | 0   | RDR2-resistant |
| AATGGTAATGGTTGTATATGGTT   | 91  | 0   | RDR2-resistant |
| AATGGTACTGCAGAGCATTTTCGG  | 0   | 10  | RDR2-sensitive |
| AATGGTCGCGATTGTATTGCACGG  | 0   | 22  | RDR2-sensitive |
| AATGGTCGGTCGCTATAGAGGTAC  | 0   | 19  | RDR2-sensitive |
| AATGGTCGTACAGCTGCAGACGGTG | 1   | 13  | RDR2-sensitive |
| AATGGTCTTCGGACGAAGGTCATG  | 16  | 0   | RDR2-resistant |
| AATGGTCTTTGGACGAAGGTCATG  | 24  | 2   | RDR2-resistant |
| AATGGTTATGTGACTGATTATGGT  | 49  | 6   | RDR2-resistant |
| AATGGTTCCGGATCTGAGGAGAAT  | 0   | 17  | RDR2-sensitive |
| AATGGTTGAGGATCTAGACGACTA  | 333 | 0   | RDR2-resistant |
| AATGGTTTACAATCGATTACGGAC  | 0   | 16  | RDR2-sensitive |
| AATGGTTTACACTTGATTACGGAC  | 0   | 10  | RDR2-sensitive |
| AATGGTTTGGCAAACGGCTCCTC   | 0   | 9   | RDR2-sensitive |
| AATGGTTTTGTATTGTTGTTGAGA  | 15  | 0   | RDR2-resistant |
| AATGTAACTTTGTAGCAGAGCTG   | 0   | 32  | RDR2-sensitive |
| AATGTACCTGGTAGACACGTCGAC  | 0   | 16  | RDR2-sensitive |
| AATGTAGAAATAGTAGAATGCGGT  | 0   | 20  | RDR2-sensitive |
| AATGTAGACCACGAGTGAACCGT   | 1   | 15  | RDR2-sensitive |
| AATGTAGGACATTGTTACGGTGGC  | 58  | 7   | RDR2-resistant |
| AATGTAGTGA CTCTCCACGGCCAT | 0   | 9   | RDR2-sensitive |
| AATGTATGGATATGGGAGGGCAGA  | 29  | 5   | RDR2-resistant |

|                             |     |    |                |
|-----------------------------|-----|----|----------------|
| AATGTCAGATGACGGCTGTTAGCT    | 0   | 11 | RDR2-sensitive |
| AATGTCGGTGGCGTCTACATGCTC    | 0   | 20 | RDR2-sensitive |
| AATGTCTCGAAGGACGAAGGGCAT    | 0   | 13 | RDR2-sensitive |
| AATGTCTCGCGTCTGGTCTGTCGGC   | 0   | 9  | RDR2-sensitive |
| AATGTCTGATCGTTTTGGAGGGAGC   | 33  | 1  | RDR2-resistant |
| AATGTCTGGGAAGCTCTCACGGTG    | 0   | 10 | RDR2-sensitive |
| AATGTGAACTCATCTATTGGCATT    | 55  | 3  | RDR2-resistant |
| AATGTGAACTCATTGTATTGCATA    | 0   | 11 | RDR2-sensitive |
| AATGTGACAGAGGATAGAAGCATT    | 17  | 0  | RDR2-resistant |
| AATGTGGAAGCTCTAGCGAGGGGCG   | 0   | 25 | RDR2-sensitive |
| AATGTGGATCTCTTAGGTTTGTAC    | 25  | 0  | RDR2-resistant |
| AATGTGGTCTAGTTCTGGCACGGT    | 0   | 16 | RDR2-sensitive |
| AATGTGTAGTGTGATGGTCTGGGT    | 22  | 0  | RDR2-resistant |
| AATGTGTCCAGGATGAAGATAGGT    | 19  | 0  | RDR2-resistant |
| AATGTGTGAACAGGTATCTTCGGA    | 4   | 29 | RDR2-sensitive |
| AATGTGTTTGACATGATCTGGGAA    | 164 | 5  | RDR2-resistant |
| AATGTGTTTGTTGTAGGTTGCAT     | 0   | 13 | RDR2-sensitive |
| AATGTTATGGACTCGCATGTTGCT    | 62  | 0  | RDR2-resistant |
| AATGTTATGGACTGTGTTGCAGAA    | 0   | 15 | RDR2-sensitive |
| AATGTTCTGAACGAATTGTGGCAA    | 48  | 1  | RDR2-resistant |
| AATGTTGCACAGGATTGTTGGCTA    | 44  | 6  | RDR2-resistant |
| AATGTTGCATATGATTGTTGGCTA    | 23  | 0  | RDR2-resistant |
| AATGTTGGACAGCAGATAGATTGG    | 27  | 3  | RDR2-resistant |
| AATGTTGTCGCAGTAGACCACGGT    | 0   | 14 | RDR2-sensitive |
| AATGTTGTCTGTAGACGGCGGCTT    | 0   | 13 | RDR2-sensitive |
| AATGTTGTTGGACGCATTGCGCAT    | 0   | 14 | RDR2-sensitive |
| AATGTTTCAGCGGACGAAGGGCAT    | 0   | 11 | RDR2-sensitive |
| AATGTTTCGAAGGACGAAGGGCAT    | 0   | 18 | RDR2-sensitive |
| AATGTTTGACTGTCGCGTGCCTTT    | 84  | 0  | RDR2-resistant |
| AATGTTTGGACGGCTATAGCTACA    | 0   | 10 | RDR2-sensitive |
| AATGTTTGGCACTGAATCGACGTC    | 0   | 37 | RDR2-sensitive |
| AATTAATATGTTGGACACTTAAT     | 0   | 9  | RDR2-sensitive |
| AATTAATTTGCACCGTTGGTCTGA    | 105 | 0  | RDR2-resistant |
| AATTACAGCTGTAGCTAGGATGGC    | 0   | 9  | RDR2-sensitive |
| AATTACTIONCGCGGGCCACGGCTAC  | 0   | 9  | RDR2-sensitive |
| AATTACTIONCGTGGACCTACAGCATA | 0   | 12 | RDR2-sensitive |
| AATTACTIONTGAACATGGTCGACGGC | 0   | 27 | RDR2-sensitive |
| AATTAGCCTCTTCGGACGGTCGGA    | 0   | 18 | RDR2-sensitive |
| AATTAGCGGCTCTGGCGACGTCTG    | 0   | 11 | RDR2-sensitive |
| AATTAGGCCTTTCGGACGGTCGGA    | 0   | 16 | RDR2-sensitive |
| AATTAGGTTGGGCCGTGCCGGATA    | 0   | 9  | RDR2-sensitive |
| AATTAGTAAAATTGGTGCCTCGTT    | 14  | 0  | RDR2-resistant |
| AATTAGTACTATTTTCGGCGGCAT    | 0   | 9  | RDR2-sensitive |
| AATTAGTCTCTGTAGAGTGGCAGA    | 135 | 0  | RDR2-resistant |
| AATTAGTGACGCGCATGAATGGAT    | 18  | 1  | RDR2-resistant |
| AATTAGTTTGGCGTGACATGTAA     | 0   | 12 | RDR2-sensitive |
| AATTATAGACTGTAGTGTGGTGTC    | 0   | 21 | RDR2-sensitive |
| AATTATTGTAGATCTTGAGAGGTT    | 20  | 2  | RDR2-resistant |
| AATTATTGGTTGCGTTGGCTCTT     | 20  | 0  | RDR2-resistant |



|                           |    |     |                |
|---------------------------|----|-----|----------------|
| AATTATTTGTGTTGGACAATTCAA  | 0  | 12  | RDR2-sensitive |
| AATTCAAACGGACTAGACTGGCTC  | 0  | 20  | RDR2-sensitive |
| AATTCAAACGGGCTGGATCGGCCT  | 0  | 10  | RDR2-sensitive |
| AATTCACAATGTGATCTATGGCA   | 14 | 0   | RDR2-resistant |
| AATTCACCGGACTGTACGGTGGTG  | 6  | 28  | RDR2-sensitive |
| AATTCACCGGACTGTCTGGTGGTG  | 1  | 13  | RDR2-sensitive |
| AATTCACTAGTCGGTTGACGGTCC  | 0  | 15  | RDR2-sensitive |
| AATTCAGCCTGTAGTGTCCGCCCA  | 0  | 10  | RDR2-sensitive |
| AATTCATCTGAGATTGATTGTAGC  | 56 | 6   | RDR2-resistant |
| AATTCATGTCCGGCCGGCACGATC  | 0  | 15  | RDR2-sensitive |
| AATTCGAACGACTAACCTTAGGCA  | 1  | 68  | RDR2-sensitive |
| AATTCGACTGACGTGGATGGGCTA  | 0  | 10  | RDR2-sensitive |
| AATTCGATCTATTCGGGTTCCGTT  | 0  | 11  | RDR2-sensitive |
| AATTCGATTTTGGATAGACAGGCC  | 25 | 0   | RDR2-resistant |
| AATTCGGACGACGGTGC GGCGCGC | 0  | 12  | RDR2-sensitive |
| AATTCGGACGACTAATCTTAGGCA  | 0  | 10  | RDR2-sensitive |
| AATTCGGGCTGGCACGACACGGTT  | 0  | 11  | RDR2-sensitive |
| AATTCGGTCTATTCAGGTTCCGTT  | 0  | 10  | RDR2-sensitive |
| AATTCGGTCTATTCGGGTTCCGTT  | 5  | 378 | RDR2-sensitive |
| AATTCGGTCTATTCGTGTTCCGTT  | 0  | 14  | RDR2-sensitive |
| AATTCGGTCTATTTGGGTTCCGTT  | 0  | 17  | RDR2-sensitive |
| AATTCGGTCTGTTCCGGTTCCGTT  | 0  | 39  | RDR2-sensitive |
| AATTCGGTTCGGTCTATTCGGGTT  | 4  | 23  | RDR2-sensitive |
| AATTCGGTTCGGTCTATTCGGTTT  | 0  | 28  | RDR2-sensitive |
| AATTCGTTGGTTGTTGCATATTGG  | 0  | 14  | RDR2-sensitive |
| AATTCTACACTTATGCAAGGACTG  | 0  | 12  | RDR2-sensitive |
| AATTCTAGTGAATTGGACCGTCTG  | 0  | 14  | RDR2-sensitive |
| AATTCTGTGCATGAGTGGACGGTC  | 0  | 12  | RDR2-sensitive |
| AATTCTTAAGACGGTAGTGTAGAC  | 0  | 22  | RDR2-sensitive |
| AATTCTTTCCGGTCCGGCATGACAT | 0  | 9   | RDR2-sensitive |
| AATTGAACGGACCGAGTTGGCCAG  | 0  | 10  | RDR2-sensitive |
| AATTGAACGGGCGGAGCTGGCTAG  | 0  | 10  | RDR2-sensitive |
| AATTGAAGGCGGGCCCACAGGAAC  | 0  | 32  | RDR2-sensitive |
| AATTGAAGGGACGAGAGAGGACGC  | 0  | 13  | RDR2-sensitive |
| AATTGACTGTAGTTGGTACCTTGC  | 0  | 12  | RDR2-sensitive |
| AATTGATGATCGTTCTTTTTGGCC  | 87 | 10  | RDR2-resistant |
| AATTGCGCGGCGGACTAGCGGCTA  | 0  | 34  | RDR2-sensitive |
| AATTGGAACGATACAGAGAAGATT  | 46 | 2   | RDR2-resistant |
| AATTGGAACTCCAGCATAGCTGCA  | 0  | 16  | RDR2-sensitive |
| AATTGGAAGGATGAGAGAGGACGC  | 0  | 9   | RDR2-sensitive |
| AATTGGAAGTGGGCCACGTGAAC   | 0  | 15  | RDR2-sensitive |
| AATTGGACTTTCGGTATTATAACA  | 0  | 29  | RDR2-sensitive |
| AATTGGAGCTCAAGCGAACGGACT  | 0  | 11  | RDR2-sensitive |
| AATTGGAGGGACAAGAGAGGACGC  | 0  | 31  | RDR2-sensitive |
| AATTGGAGGGACAAGAGAGGACGT  | 0  | 9   | RDR2-sensitive |
| AATTGGAGGGACGAGAGAGGACGA  | 0  | 14  | RDR2-sensitive |
| AATTGGAGGGACGAGAGAGGACGC  | 1  | 48  | RDR2-sensitive |
| AATTGGAGGGACGAGAGAGGACGT  | 1  | 35  | RDR2-sensitive |
| AATTGGAGTGACGAGAGAGGACGC  | 0  | 9   | RDR2-sensitive |

|                           |    |     |                |
|---------------------------|----|-----|----------------|
| AATTGGATCGTGCCTGTACCCGGC  | 0  | 9   | RDR2-sensitive |
| AATTGGATGGACGAGAGAGGACGT  | 0  | 12  | RDR2-sensitive |
| AATTGGTTTCGGTACAAAAGGTTG  | 16 | 0   | RDR2-resistant |
| AATTGTCAGCGACCTCCCGGCCT   | 0  | 9   | RDR2-sensitive |
| AATTGTCGTCAACTGTATATGGCT  | 1  | 63  | RDR2-sensitive |
| AATTGTCTTTTTCGCTCGGTCACG  | 0  | 10  | RDR2-sensitive |
| AATTGTGGACGGATGAACTGGCGT  | 0  | 14  | RDR2-sensitive |
| AATTGTGGTATTGTAAACTGCGGT  | 3  | 45  | RDR2-sensitive |
| AATTGTGGTTGTAGTAAAGGCAAT  | 1  | 21  | RDR2-sensitive |
| AATTGTGTGGAACGTACAACGGCT  | 0  | 9   | RDR2-sensitive |
| AATTGTGTGGAACCTACAACGGCA  | 0  | 10  | RDR2-sensitive |
| AATTGTTAGTCGGTATACATTGCC  | 0  | 15  | RDR2-sensitive |
| AATTGTTAGATCGTTGGATAACT   | 0  | 12  | RDR2-sensitive |
| AATTGTTCCGACTGCGGCAGCTAC  | 0  | 25  | RDR2-sensitive |
| AATTGTTGATGTGGAACAATCGGG  | 19 | 0   | RDR2-resistant |
| AATTGTTGTGCTACGGTCTAATTC  | 42 | 1   | RDR2-resistant |
| AATTGTTTATTTAATCGGGCATT   | 17 | 1   | RDR2-resistant |
| AATTGTTTGGTATCTTAGGCACAA  | 18 | 0   | RDR2-resistant |
| AATTTAAATTTCTGACGCGTCTGC  | 14 | 0   | RDR2-resistant |
| AATTTAGAGGACCGTTTAGAGGAC  | 0  | 9   | RDR2-sensitive |
| AATTTAGAGGACGCTGCTGGAGAC  | 0  | 16  | RDR2-sensitive |
| AATTTAGAGGACGCTGCTGGATTC  | 1  | 15  | RDR2-sensitive |
| AATTTAGAGGACGTTGCTGGAGAC  | 1  | 17  | RDR2-sensitive |
| AATTTAGGGGACGCTGCTGGAGAC  | 5  | 21  | RDR2-sensitive |
| AATTTAGGGGACGTTGCTGGAGAC  | 1  | 23  | RDR2-sensitive |
| AATTTAGTGGACGAGGACGTGCGC  | 0  | 15  | RDR2-sensitive |
| AATTTATGTGTTTGTGGATGGTT   | 2  | 15  | RDR2-sensitive |
| AATTTCTGGTGAGATCTGTCCGT   | 0  | 12  | RDR2-sensitive |
| AATTTCCGCTGGTACTGTGGTGGGC | 0  | 17  | RDR2-sensitive |
| AATTTCCGTTCCGGTCTATTCGGTC | 13 | 111 | RDR2-sensitive |
| AATTTCCGTTCCGGTCTATTCGGTT | 2  | 22  | RDR2-sensitive |
| AATTTCCGTTCCGGTCCGGTACGGT | 1  | 26  | RDR2-sensitive |
| AATTTCTAGTGGCATTGAACGGAT  | 16 | 0   | RDR2-resistant |
| AATTTGACTGCGGTTTCTACGGTA  | 0  | 11  | RDR2-sensitive |
| AATTTGAGCATCGTTGGACAATGG  | 34 | 4   | RDR2-resistant |
| AATTTGCACCGTTGGTCTGAAAGA  | 26 | 0   | RDR2-resistant |
| AATTTGCCTCTTCGGACGATCGGT  | 0  | 9   | RDR2-sensitive |
| AATTTGGACGACTAACCTTAGGCA  | 3  | 18  | RDR2-sensitive |
| AATTTGGACTGATGGGAGGGCTAT  | 0  | 15  | RDR2-sensitive |
| AATTTGGACTGGTGGGAGGGCTAT  | 9  | 150 | RDR2-sensitive |
| AATTTGGGATTATTCGGATTTTCT  | 16 | 0   | RDR2-resistant |
| AATTTGGTATCAGAGGACGGTCGA  | 0  | 10  | RDR2-sensitive |
| AATTTGGTCAGTCGGTGTGGCGAT  | 4  | 27  | RDR2-sensitive |
| AATTTGTCAGCAGCTTTATGGATT  | 29 | 1   | RDR2-resistant |
| AATTTGTGGTAAGATTTTCCGGAT  | 51 | 0   | RDR2-resistant |
| AATTTGTTGATGATGAAGCGTGCT  | 17 | 0   | RDR2-resistant |
| AATTTTAGAGGACGCCGGACGCAC  | 0  | 9   | RDR2-sensitive |
| AATTTTATTTGCACGTTTGGACCC  | 0  | 12  | RDR2-sensitive |
| AATTTTCAGATTGTGCAGTGTGTT  | 14 | 0   | RDR2-resistant |

|                            |    |    |                |
|----------------------------|----|----|----------------|
| AATTTTCGGCGGCCAGGGATGAGC   | 0  | 15 | RDR2-sensitive |
| AATTTTCGGTTCGGTAATTCGGTT   | 1  | 20 | RDR2-sensitive |
| AATTTTGAGGGACAACAGGGGACA   | 0  | 10 | RDR2-sensitive |
| AATTTTGGACCCATTCTCGGCGC    | 1  | 17 | RDR2-sensitive |
| AATTTTGTAGTGGCTTGGATTTAA   | 20 | 0  | RDR2-resistant |
| AATTTTGTTAAGAAGATACTGTAT   | 38 | 4  | RDR2-resistant |
| AATTTTGTTAGTTTTGAATGCATG   | 14 | 0  | RDR2-resistant |
| AATTTTTGTTTCGGTTCGGAATCGGT | 2  | 54 | RDR2-sensitive |
| ACAAAACACTAGAACAGAACGGCTCC | 0  | 10 | RDR2-sensitive |
| ACAAAACACTAGGACTGAACGGCTAC | 0  | 9  | RDR2-sensitive |
| ACAAAACACTGGGACAGAACGGCTCC | 0  | 49 | RDR2-sensitive |
| ACAAAACACTGGGACAGAACGGCTTC | 0  | 9  | RDR2-sensitive |
| ACAAAAGGCTGGCTTGC GTTCGCT  | 0  | 15 | RDR2-sensitive |
| ACAAACTCGCAGGCTTAGACGACC   | 0  | 13 | RDR2-sensitive |
| ACAAAGCTGACTGAGAGACGCCAC   | 0  | 14 | RDR2-sensitive |
| ACAAAGCTGACTGGGAGACGCCAC   | 0  | 25 | RDR2-sensitive |
| ACAAATATTTGTGATTGACGTGAC   | 0  | 10 | RDR2-sensitive |
| ACAACACAGGACTGTAGGAGCATA   | 0  | 10 | RDR2-sensitive |
| ACAACACCGGCTAGGGGACGACGT   | 0  | 10 | RDR2-sensitive |
| ACAACACTCGGCAAAGCCTCGGAT   | 0  | 12 | RDR2-sensitive |
| ACAACACTGTAGATCATTTTCGGC   | 0  | 11 | RDR2-sensitive |
| ACAACACTGTAGCCGGCTAACCGT   | 0  | 26 | RDR2-sensitive |
| ACAACAGATCTGGCTGCAAGTTTC   | 20 | 0  | RDR2-resistant |
| ACAACAGTCTGAACAGTCGGCTTT   | 0  | 15 | RDR2-sensitive |
| ACAACCGGCAGAGCAGAACGACAT   | 1  | 13 | RDR2-sensitive |
| ACAACCTAATTTGAGGGATCGTCC   | 2  | 30 | RDR2-sensitive |
| ACAACCTAATTTGAGGGATCGTCT   | 0  | 18 | RDR2-sensitive |
| ACAACCTCCGTCGTCAGGCCACAT   | 14 | 0  | RDR2-resistant |
| ACAACCTTATTTGAGGGATCGTCA   | 2  | 15 | RDR2-sensitive |
| ACAACCTTATTTGAGGGATCGTCC   | 0  | 14 | RDR2-sensitive |
| ACAACCTTATTTGAGGGATCGTCT   | 11 | 44 | RDR2-sensitive |
| ACAACGACCGGACGGTCCGCGCAT   | 0  | 14 | RDR2-sensitive |
| ACAACGACTGCGGATCGGCTAAAT   | 18 | 0  | RDR2-resistant |
| ACAACGTACGGGCATACAGCTAGT   | 0  | 18 | RDR2-sensitive |
| ACAACGTACGCAACGGTCGTCGTC   | 0  | 10 | RDR2-sensitive |
| ACAACGTGGAAGTAGGCAAGTGTT   | 0  | 24 | RDR2-sensitive |
| ACAAC TATTTATTGGACTGGGCAA  | 17 | 1  | RDR2-resistant |
| ACAAC TCCGTTGGACTACGGGTGG  | 44 | 5  | RDR2-resistant |
| ACAAC TCGGACTCCGCAAGACGGA  | 0  | 9  | RDR2-sensitive |
| ACAAC TCTGGAGTTAGGGTGTGG   | 0  | 10 | RDR2-sensitive |
| ACAAC TCTGGCCCAGACACGTCAT  | 4  | 42 | RDR2-sensitive |
| ACAAC TCTGGCCCAGGCACGTCAT  | 4  | 73 | RDR2-sensitive |
| ACAAC TCTGGCCCATGCACGTCAT  | 1  | 18 | RDR2-sensitive |
| ACAAC TCTGGCCTAGGCACGTCAT  | 2  | 21 | RDR2-sensitive |
| ACAAC TCTGGTCCATGCACGTCAT  | 0  | 10 | RDR2-sensitive |
| ACAAC TGTAGGTGGGCCTAATGAC  | 2  | 22 | RDR2-sensitive |
| ACAAC TGTAGGTGGGCCTAATTAC  | 0  | 9  | RDR2-sensitive |
| ACAAC TGTCTTTAATGTCGTCGGT  | 0  | 9  | RDR2-sensitive |
| ACAAC TTATCAGACCTGACGAGCT  | 0  | 14 | RDR2-sensitive |

|                            |     |    |                |
|----------------------------|-----|----|----------------|
| ACAACCTTGTGCTGATTGGATGACT  | 289 | 9  | RDR2-resistant |
| ACAACCTTTCTGTTCGATGGACGCAT | 0   | 22 | RDR2-sensitive |
| ACAAGACTAGTCGGCTAATTAATT   | 22  | 0  | RDR2-resistant |
| ACAAGACTGCATAGGGTACACCAC   | 0   | 19 | RDR2-sensitive |
| ACAAGACTGCATGCGCTCGCGGCT   | 0   | 15 | RDR2-sensitive |
| ACAAGACTGCATGCGCTCGCGGGA   | 0   | 9  | RDR2-sensitive |
| ACAAGACTGCATGCGCTCGCGGGT   | 0   | 9  | RDR2-sensitive |
| ACAAGATCGTATCTGGCCCCGGCAC  | 0   | 10 | RDR2-sensitive |
| ACAAGATCTAAGGGCCCTTCGGTT   | 0   | 10 | RDR2-sensitive |
| ACAAGCAGTCGGTAGCAACTACTA   | 0   | 28 | RDR2-sensitive |
| ACAAGCCCCTGCTGCTTAGTCGGTC  | 0   | 13 | RDR2-sensitive |
| ACAAGCCCTGACGGAACCTCGTCGT  | 0   | 9  | RDR2-sensitive |
| ACAAGCGGTTTCTCCAAAGATTAG   | 17  | 1  | RDR2-resistant |
| ACAAGCTATAAGAAGGGGTCGGAC   | 26  | 1  | RDR2-resistant |
| ACAAGCTGGGCTGCACGCGCGGGT   | 0   | 10 | RDR2-sensitive |
| ACAAGCTTATCTAGTCGTCGGTGC   | 0   | 9  | RDR2-sensitive |
| ACAAGGACAACCTGTAGGTGGGCCT  | 8   | 57 | RDR2-sensitive |
| ACAAGGACGAGCAGGGTGGGGCAA   | 0   | 9  | RDR2-sensitive |
| ACAAGGACGGGGGAACCCGACGTC   | 19  | 1  | RDR2-resistant |
| ACAAGGACGTGCTTTTCTAATATC   | 15  | 0  | RDR2-resistant |
| ACAAGGACTACACCGCGGCAGCAG   | 0   | 10 | RDR2-sensitive |
| ACAAGGACTCGGCAGATTCGGTAT   | 0   | 16 | RDR2-sensitive |
| ACAAGGATCTGGATCAGAGCGCAT   | 1   | 15 | RDR2-sensitive |
| ACAAGGCCTCAGCCTGTGTCGGAC   | 0   | 12 | RDR2-sensitive |
| ACAAGGCCTGATCTCGTTCGTCGT   | 0   | 9  | RDR2-sensitive |
| ACAAGGCTAGGTAGGACTAGGCAT   | 0   | 17 | RDR2-sensitive |
| ACAAGGCTAGTAGCAAGGTCTCGG   | 0   | 13 | RDR2-sensitive |
| ACAAGGGACTGTAAACGAACCGGT   | 1   | 12 | RDR2-sensitive |
| ACAAGTAATGTGCGGGCTGGGCAC   | 0   | 21 | RDR2-sensitive |
| ACAAGTACCTCGGGAGCATCTACC   | 20  | 0  | RDR2-resistant |
| ACAAGTATTGGGTGTGCTGATAAT   | 43  | 0  | RDR2-resistant |
| ACAAGTCCGCGGGCTTAGACGGTC   | 1   | 15 | RDR2-sensitive |
| ACAAGTCGGCGCACCTATCGGCGT   | 0   | 29 | RDR2-sensitive |
| ACAAGTCGGCGTTGTGGGTTGGCC   | 18  | 0  | RDR2-resistant |
| ACAAGTGGAGACCCTAGACTAAA    | 27  | 2  | RDR2-resistant |
| ACAAGTTCGTCTAGACATCGGTGT   | 0   | 16 | RDR2-sensitive |
| ACAAGTTGAGATGTCTATGGCAAG   | 18  | 0  | RDR2-resistant |
| ACAATACAAGATTTTTTCGGGATTG  | 0   | 9  | RDR2-sensitive |
| ACAATATTATGTACGGCTATTGAA   | 41  | 1  | RDR2-resistant |
| ACAATCAGGTGTAGATCGTCTGGC   | 4   | 21 | RDR2-sensitive |
| ACAATCCGGTGACTGTCCGGCCGA   | 0   | 16 | RDR2-sensitive |
| ACAATCGACTTAGAATTGAGATGG   | 0   | 9  | RDR2-sensitive |
| ACAATCGTGATATCGGAGAAAGGT   | 21  | 0  | RDR2-resistant |
| ACAATCTACTTTCTGTTCGTCGGT   | 0   | 22 | RDR2-sensitive |
| ACAATCTGGCTTATGAAACGGTGA   | 65  | 2  | RDR2-resistant |
| ACAATCTTATTTGATGGATCGTCT   | 0   | 14 | RDR2-sensitive |
| ACAATGACACGTAGACTGGTACGG   | 0   | 10 | RDR2-sensitive |
| ACAATGGACTGTTCGGTGCACCAC   | 0   | 11 | RDR2-sensitive |
| ACAATTACTCGTGGACCCACAGCA   | 0   | 12 | RDR2-sensitive |

|                           |    |    |                |
|---------------------------|----|----|----------------|
| ACAATTAGCGGCTCTGGCGACGTC  | 1  | 12 | RDR2-sensitive |
| ACAATTGGTCATCGCGCTTGGTTG  | 29 | 3  | RDR2-resistant |
| ACAATTTTCGGTTCGGTCTATTCGG | 1  | 15 | RDR2-sensitive |
| ACAATTTTCGTTGGATTAGATGTGG | 18 | 0  | RDR2-resistant |
| ACAATTTTTTCTGGTTGTCCGAGC  | 0  | 10 | RDR2-sensitive |
| ACACAAGACGGATCTAGACGACAT  | 0  | 13 | RDR2-sensitive |
| ACACAAGTTTGTCTAGTCGTTGGT  | 0  | 32 | RDR2-sensitive |
| ACACAAGTTTGTGTTAGTCGTTGGT | 0  | 9  | RDR2-sensitive |
| ACACAATCTGATCTGACGGAGTCT  | 15 | 0  | RDR2-resistant |
| ACACAATCTGGCTTATGAAACGGT  | 66 | 6  | RDR2-resistant |
| ACACAGAACTTGGTGTCCGGCGGAA | 1  | 19 | RDR2-sensitive |
| ACACAGACTGGACCTGAGCGCGGC  | 0  | 12 | RDR2-sensitive |
| ACACAGATGGATTGGACTTGGTAT  | 0  | 13 | RDR2-sensitive |
| ACACAGATTGTTTGGTAAGAGCAT  | 0  | 11 | RDR2-sensitive |
| ACACAGCTCGACGTCATAGACTAT  | 0  | 9  | RDR2-sensitive |
| ACACAGCTCGGCGCCATAGGCTAT  | 2  | 16 | RDR2-sensitive |
| ACACAGCTCGGCGTCATAGGCTAT  | 0  | 9  | RDR2-sensitive |
| ACACAGGACTCAGGAAGAGAGACG  | 0  | 9  | RDR2-sensitive |
| ACACAGGACTGTCCGGTGCCCAA   | 0  | 16 | RDR2-sensitive |
| ACACAGGACTGTGCAGGCGCAGCC  | 0  | 16 | RDR2-sensitive |
| ACACAGGAGCGACATGAACACCGG  | 0  | 20 | RDR2-sensitive |
| ACACAGGTCGAGACTGGACGGTTT  | 0  | 13 | RDR2-sensitive |
| ACACAGTAGGATTGTCCGCACTAC  | 0  | 10 | RDR2-sensitive |
| ACACATAACTAATTGTGGGTCGTG  | 0  | 9  | RDR2-sensitive |
| ACACATAATCGTTGAGTCGTTGT   | 1  | 16 | RDR2-sensitive |
| ACACATGACTGCACCCAAGACCAC  | 0  | 9  | RDR2-sensitive |
| ACACATGCAGAGGACACGGGAAAC  | 0  | 9  | RDR2-sensitive |
| ACACATGCGTTCGGTCTAGATGGA  | 0  | 10 | RDR2-sensitive |
| ACACATGGATTGGATGAGATTGGA  | 0  | 31 | RDR2-sensitive |
| ACACATGGATTGGATGGGATTGGA  | 0  | 11 | RDR2-sensitive |
| ACACATGTTGGATAAAATGGCGTG  | 62 | 14 | RDR2-resistant |
| ACACCACTGTTGGGTTGTCCGGCCC | 0  | 14 | RDR2-sensitive |
| ACACCAGGTCGCGGACCGTCCGGC  | 0  | 15 | RDR2-sensitive |
| ACACCAGTCGGAGACGTCACGTAG  | 0  | 9  | RDR2-sensitive |
| ACACCATAGACTATGACGACGAGC  | 0  | 12 | RDR2-sensitive |
| ACACCCCCTGTAGACCCGGCTGGC  | 0  | 11 | RDR2-sensitive |
| ACACCGATCCTGCTCTGGCGGCGC  | 0  | 14 | RDR2-sensitive |
| ACACCGCGCACTGTAGACGACGGC  | 0  | 23 | RDR2-sensitive |
| ACACCGCGGCTGGCATAGTGCACA  | 0  | 20 | RDR2-sensitive |
| ACACCGCTGTAGAGGGAGGGGTAG  | 0  | 13 | RDR2-sensitive |
| ACACCGGACTGTCCAGTGGTGCAC  | 3  | 34 | RDR2-sensitive |
| ACACCGGACTGTCCGATGGTGCAC  | 0  | 12 | RDR2-sensitive |
| ACACCGGAGTAGTTTTTGTGGCG   | 1  | 48 | RDR2-sensitive |
| ACACCGTAGTAATTTTTGTGGCG   | 0  | 12 | RDR2-sensitive |
| ACACCGTTGGATACTGGACGGATG  | 0  | 14 | RDR2-sensitive |
| ACACCGTTGGATATTGGACGGATG  | 0  | 64 | RDR2-sensitive |
| ACACCGTTGGATATTGGATGGATG  | 0  | 43 | RDR2-sensitive |
| ACACCGTTGGATGTGGAGGGTGCG  | 0  | 19 | RDR2-sensitive |
| ACACCGTTGGATGTGGAGGGTGTG  | 0  | 18 | RDR2-sensitive |

|                            |     |     |                |
|----------------------------|-----|-----|----------------|
| ACACCGTTGGCGCACTGTTGGCAC   | 0   | 10  | RDR2-sensitive |
| ACACCTAGGTCGTGGACTGTCCGG   | 0   | 16  | RDR2-sensitive |
| ACACCTCAAGCCAGTCTGTCCGGAT  | 0   | 9   | RDR2-sensitive |
| ACACCTCGTACATGTAGCTAGCGG   | 0   | 14  | RDR2-sensitive |
| ACACCTCTGAGTCTGCCGGCACAA   | 0   | 9   | RDR2-sensitive |
| ACACCTGGTGATTATGTTCCGCGCC  | 0   | 11  | RDR2-sensitive |
| ACACCTGTGTTTGC GTTGTCCGGGC | 0   | 11  | RDR2-sensitive |
| ACACCTTCGGTCTAGCCACGGCTC   | 0   | 11  | RDR2-sensitive |
| ACACCTTTGGACGTTTTCCGGCGC   | 0   | 9   | RDR2-sensitive |
| ACACCTTTTCGTCCAATGTCCGGTT  | 0   | 25  | RDR2-sensitive |
| ACACGAAGGGCGACACGAAGATGT   | 0   | 10  | RDR2-sensitive |
| ACACGAATAAGCTGGACTGGGCAC   | 0   | 15  | RDR2-sensitive |
| ACACGACCTAGTAGCAGGAACGAC   | 0   | 47  | RDR2-sensitive |
| ACACGACGGACACCAAGCGGGGAG   | 0   | 11  | RDR2-sensitive |
| ACACGACGGATGCGGCTTCGACGA   | 0   | 13  | RDR2-sensitive |
| ACACGACGGTTGATCTTTAGCGAC   | 4   | 32  | RDR2-sensitive |
| ACACGACTCTCGGCAACGGATATC   | 548 | 36  | RDR2-resistant |
| ACACGACTGAGGAGTGGACGTGAC   | 0   | 9   | RDR2-sensitive |
| ACACGATGAGACTGGAGTAGAGGC   | 1   | 31  | RDR2-sensitive |
| ACACGATTGAGGATGTATTTGGCA   | 0   | 18  | RDR2-sensitive |
| ACACGCAGCCGTTGGACATTGCAC   | 0   | 10  | RDR2-sensitive |
| ACACGCATGGACTGTCTAGGGCGC   | 0   | 15  | RDR2-sensitive |
| ACACGCCTGCTAGACGAGTCGGAC   | 0   | 22  | RDR2-sensitive |
| ACACGCCTGTAAGACGAGTCGGAC   | 0   | 9   | RDR2-sensitive |
| ACACGCGGGACGGCGGACAGACAC   | 0   | 9   | RDR2-sensitive |
| ACACGCTGGACGAACGAGATCGGC   | 0   | 11  | RDR2-sensitive |
| ACACGCTGGAGGCAGAACACGTCA   | 0   | 11  | RDR2-sensitive |
| ACACGCTGTGGCAGAACCGTGCAC   | 1   | 26  | RDR2-sensitive |
| ACACGCTTGTTCCGACAACGCATA   | 0   | 134 | RDR2-sensitive |
| ACACGCTTTGGTACATTTAGGCAT   | 19  | 0   | RDR2-resistant |
| ACACGGAATGACAGCCTACCCCTT   | 0   | 9   | RDR2-sensitive |
| ACACGGACCATAGGGGGGCCGGGG   | 40  | 1   | RDR2-resistant |
| ACACGGACGGTCTAGATCGCCGGG   | 0   | 21  | RDR2-sensitive |
| ACACGGACGGTGTAGATTAGCCGG   | 0   | 13  | RDR2-sensitive |
| ACACGGATGTGAAGGCCTACACTA   | 0   | 29  | RDR2-sensitive |
| ACACGGATTTGTGGACATAGGTAT   | 0   | 10  | RDR2-sensitive |
| ACACGGCTGAGCACGTGGGCCGGC   | 0   | 9   | RDR2-sensitive |
| ACACGGCTGGAGAATGTAGAGGAC   | 1   | 16  | RDR2-sensitive |
| ACACGGCTTATAGTGATTTCGTCGT  | 0   | 11  | RDR2-sensitive |
| ACACGGTACTGTTAGTGAGGACGT   | 0   | 9   | RDR2-sensitive |
| ACACGTAGACGGTCTGTGCTGCTA   | 0   | 9   | RDR2-sensitive |
| ACACGTAGGAGGCGCTGTAGGGGC   | 0   | 20  | RDR2-sensitive |
| ACACGTAGGGCGCTGTAGCAGGCA   | 0   | 15  | RDR2-sensitive |
| ACACGTAGGGGCGCTGTAGAGGGC   | 0   | 91  | RDR2-sensitive |
| ACACGTAGGGGCGCTGTAGGGGGC   | 0   | 31  | RDR2-sensitive |
| ACACGTAGGGGGCGCTGTAGGGGC   | 3   | 35  | RDR2-sensitive |
| ACACGTAGGGGTGCTGTAGGGGGC   | 0   | 14  | RDR2-sensitive |
| ACACGTAGTGGGCGCTGTAGGGGC   | 1   | 25  | RDR2-sensitive |
| ACACGTCTGCTGCTCCTGACGGCT   | 0   | 9   | RDR2-sensitive |

|                            |     |    |                |
|----------------------------|-----|----|----------------|
| ACACGTGCTCGCGTTTGTCTCGCGA  | 0   | 16 | RDR2-sensitive |
| ACACGTGGACCAATCAGATCGCGA   | 0   | 58 | RDR2-sensitive |
| ACACGTGGACCAATCAGATCGCGC   | 0   | 26 | RDR2-sensitive |
| ACACGTGGGTCTGTTATTGGGCAA   | 0   | 9  | RDR2-sensitive |
| ACACGTTACGTGCGAGATCTCGGG   | 0   | 27 | RDR2-sensitive |
| ACACGTTTGGCTTATGAGCAGGCT   | 0   | 9  | RDR2-sensitive |
| ACACTAAGACTGTGTTTGGTTGGA   | 0   | 12 | RDR2-sensitive |
| ACACTACACATGGTCGGACGGTCC   | 0   | 18 | RDR2-sensitive |
| ACACTACCATCTGATCTTTGGACA   | 0   | 12 | RDR2-sensitive |
| ACACTAGTGCCTGCAGATTCCGGTG  | 27  | 2  | RDR2-resistant |
| ACACTACTCGTCGGCTTAGGGAC    | 3   | 36 | RDR2-sensitive |
| ACACTCATGTCTGTTGGATGGTTT   | 391 | 0  | RDR2-resistant |
| ACACTCGACACTCGGCAAAGACGC   | 0   | 11 | RDR2-sensitive |
| ACACTCGGCAAAGAACACTCGGCA   | 0   | 57 | RDR2-sensitive |
| ACACTCGGCAAAGAACGCTCGGCG   | 1   | 41 | RDR2-sensitive |
| ACACTCGGCAAAGAAGGCTCGGCA   | 0   | 22 | RDR2-sensitive |
| ACACTCGGCAAAGACGGCTCTCGG   | 0   | 9  | RDR2-sensitive |
| ACACTCGGCAAAGATGGCTCTCGG   | 0   | 12 | RDR2-sensitive |
| ACACTCGGCAAAGCCTCGGATTCC   | 0   | 24 | RDR2-sensitive |
| ACACTCGGCAAAGTCTCGGATTCC   | 0   | 11 | RDR2-sensitive |
| ACACTCGGCACAGAATGATCGGCG   | 0   | 14 | RDR2-sensitive |
| ACACTCGGGAGTAGAAAGACGGAT   | 0   | 15 | RDR2-sensitive |
| ACACTCTATGGGCTGTCTGATGGC   | 0   | 10 | RDR2-sensitive |
| ACACTCTCTCTCTCGGACTCGGTC   | 0   | 12 | RDR2-sensitive |
| ACACTCTGCAGAGGCTGCACATCT   | 0   | 9  | RDR2-sensitive |
| ACACTCTGCAGAGGTGGTACCCTT   | 2   | 15 | RDR2-sensitive |
| ACACTCTGCAGAGGTTGTGCACTT   | 3   | 16 | RDR2-sensitive |
| ACACTCTGGCCCATGAACACGCTT   | 0   | 34 | RDR2-sensitive |
| ACACTCTGTAACTGCATGCATTAA   | 29  | 1  | RDR2-resistant |
| ACACTCTGTATCTTAGAACGCGCA   | 0   | 39 | RDR2-sensitive |
| ACACTCTTGAACCCCTCGGATGGT   | 30  | 0  | RDR2-resistant |
| ACACTGAACAGGAGAGAGCTCCAG   | 0   | 13 | RDR2-sensitive |
| ACACTGCTCGGAGGTAATGGCATG   | 0   | 13 | RDR2-sensitive |
| ACACTGCTGAATCATGGATGGTGT   | 0   | 11 | RDR2-sensitive |
| ACACTGGACGGACAGCGACGGTCG   | 0   | 14 | RDR2-sensitive |
| ACACTGGCAGAACACGGAATGGCA   | 0   | 9  | RDR2-sensitive |
| ACACTGGCCTTTAGAACTAGCGGC   | 0   | 28 | RDR2-sensitive |
| ACACTGGGATGAGCATCGACACAT   | 0   | 10 | RDR2-sensitive |
| ACACTGGGCTGTATAAACC CGCGGC | 0   | 15 | RDR2-sensitive |
| ACACTGGTTTTCGTCGATCTCGGAT  | 0   | 10 | RDR2-sensitive |
| ACACTGTACGAATGTGTCTGTCTGT  | 1   | 17 | RDR2-sensitive |
| ACACTGTAGACGACGTTGTTTGAC   | 0   | 10 | RDR2-sensitive |
| ACACTGTAGACGCCTACACGGTGT   | 0   | 10 | RDR2-sensitive |
| ACACTGTAGACTGCATATAGTCAT   | 0   | 13 | RDR2-sensitive |
| ACACTGTAGATCATTTTCGGCGGC   | 1   | 13 | RDR2-sensitive |
| ACACTGTAGATCATTTTCGGCGGT   | 0   | 13 | RDR2-sensitive |
| ACACTGTAGATTGCACGGTTCGTA   | 0   | 14 | RDR2-sensitive |
| ACACTGTAGCCGCTATAGGATGCA   | 0   | 21 | RDR2-sensitive |
| ACACTGTAGCTTTAATCCGACTGC   | 0   | 36 | RDR2-sensitive |

|                           |   |     |                |
|---------------------------|---|-----|----------------|
| ACACTGTAGCTTTAGGGGACCGAA  | 0 | 27  | RDR2-sensitive |
| ACACTGTAGCTTTAGGGGACGTTG  | 0 | 21  | RDR2-sensitive |
| ACACTGTAGCTTTAGGGGATGGAA  | 0 | 11  | RDR2-sensitive |
| ACACTGTAGTAATTGTTTGGTGGC  | 0 | 25  | RDR2-sensitive |
| ACACTGTCTGGGAGGGTCGCCGGGA | 0 | 10  | RDR2-sensitive |
| ACACTGTCTTGCGCAATTCGTCGT  | 0 | 9   | RDR2-sensitive |
| ACACTGTGAGTTATATTGTCTGGG  | 0 | 13  | RDR2-sensitive |
| ACACTGTGCTAGCTAGGTCGGGTC  | 0 | 10  | RDR2-sensitive |
| ACACTGTGTGTGGCTTTCTGTCGT  | 0 | 11  | RDR2-sensitive |
| ACACTGTTCACTCCTAGAGGCCGC  | 0 | 11  | RDR2-sensitive |
| ACACTGTTGAAGCATGGACGGGGT  | 0 | 18  | RDR2-sensitive |
| ACACTGTTGCAGCTGTTTGGACTG  | 1 | 141 | RDR2-sensitive |
| ACACTGTTGCAGCTGTTTGGATTG  | 0 | 33  | RDR2-sensitive |
| ACACTGTTGGACTGGCCCACGGTC  | 0 | 25  | RDR2-sensitive |
| ACACTTCGGACTAGCACGACACGG  | 0 | 22  | RDR2-sensitive |
| ACACTTCGGACTAGCACGGCACAA  | 0 | 18  | RDR2-sensitive |
| ACACTTCGGACTAGCACGGCACGG  | 1 | 25  | RDR2-sensitive |
| ACACTTCGGACTAGTACGGCATGA  | 0 | 14  | RDR2-sensitive |
| ACACTTCGGACTCGCACGGCATGA  | 0 | 16  | RDR2-sensitive |
| ACACTTCGGACTGGCACGGCACGA  | 0 | 16  | RDR2-sensitive |
| ACACTTCGGACTGTCACGACACGG  | 0 | 13  | RDR2-sensitive |
| ACACTTCGGACTGTCCGGTGCAAC  | 0 | 11  | RDR2-sensitive |
| ACACTTCGGGCTGACACGACACGG  | 0 | 43  | RDR2-sensitive |
| ACACTTCGGGCTGACACGTCACAG  | 0 | 31  | RDR2-sensitive |
| ACACTTCGGGCTGGCACGACACGG  | 6 | 190 | RDR2-sensitive |
| ACACTTCGGGCTGGCACGATACGG  | 1 | 26  | RDR2-sensitive |
| ACACTTCGGGCTGGCACGGCACAA  | 0 | 10  | RDR2-sensitive |
| ACACTTCGGGCTGGCACGGCACGG  | 0 | 72  | RDR2-sensitive |
| ACACTTCGGGCTGGCACGGCATGT  | 0 | 12  | RDR2-sensitive |
| ACACTTCGGGCTGGCACGGTACGG  | 0 | 30  | RDR2-sensitive |
| ACACTTCGGGCTGGCACGGTATGA  | 0 | 41  | RDR2-sensitive |
| ACACTTCGGGCTGGCACGGTGTGA  | 0 | 11  | RDR2-sensitive |
| ACACTTCGGGCTGGCATGACACGG  | 0 | 12  | RDR2-sensitive |
| ACACTTCGGGCTGGCATGGTATGA  | 0 | 9   | RDR2-sensitive |
| ACACTTCGGGCTGGTACGACACGC  | 0 | 9   | RDR2-sensitive |
| ACACTTCGGGCTGGTACGACACGG  | 0 | 31  | RDR2-sensitive |
| ACACTTCGTCTGTATGTAAGCGGT  | 0 | 9   | RDR2-sensitive |
| ACACTTTCAACTGGGCGAGGACGT  | 0 | 9   | RDR2-sensitive |
| ACACTTTGCTTAAGGTTGGTCGTC  | 0 | 14  | RDR2-sensitive |
| ACACTTTGGACTGGCACGACACGG  | 1 | 41  | RDR2-sensitive |
| ACACTTTGGGCTGGCACGACACGG  | 2 | 57  | RDR2-sensitive |
| ACACTTTGGGCTGGCACGGTACGT  | 0 | 11  | RDR2-sensitive |
| ACACTTTGGGCTGGTATGGTACGG  | 1 | 56  | RDR2-sensitive |
| ACAGAACACGGAATGGGGCAGCCT  | 0 | 10  | RDR2-sensitive |
| ACAGAACAGAGCGGCTCCGTTCCCT | 4 | 77  | RDR2-sensitive |
| ACAGAACATCGAACGGCAGGTCCT  | 0 | 22  | RDR2-sensitive |
| ACAGAACGCCGACGGATGGCTCGC  | 0 | 9   | RDR2-sensitive |
| ACAGAACGCTGACGTGGCACGTGA  | 0 | 20  | RDR2-sensitive |
| ACAGAACGGATGGCTTGATGCAT   | 0 | 12  | RDR2-sensitive |



|                           |     |    |                |
|---------------------------|-----|----|----------------|
| ACAGAACGGATGGGCTGGATGCAT  | 0   | 13 | RDR2-sensitive |
| ACAGAAGACTGTAAAGGACGGATA  | 0   | 48 | RDR2-sensitive |
| ACAGAAGGACAGCGTCGCCTGCGC  | 0   | 10 | RDR2-sensitive |
| ACAGAATGGCAGAACGGCTGGCTA  | 0   | 10 | RDR2-sensitive |
| ACAGAATGGTAGAACGGATGGTTG  | 0   | 17 | RDR2-sensitive |
| ACAGAATGTTGTCTGTAGACGGCG  | 1   | 23 | RDR2-sensitive |
| ACAGACAGAAGCAGGACGTGACAC  | 0   | 12 | RDR2-sensitive |
| ACAGACCAACAGTAGATCGGGCCC  | 0   | 10 | RDR2-sensitive |
| ACAGACCAGCGAGAACGACGACAT  | 0   | 14 | RDR2-sensitive |
| ACAGACGGCATGCAGGACAGACGG  | 0   | 9  | RDR2-sensitive |
| ACAGACGGTCGTGCTCGTAAGCAG  | 0   | 10 | RDR2-sensitive |
| ACAGACGTGGAACAGGTGGCGCAC  | 0   | 9  | RDR2-sensitive |
| ACAGACGTGGGACAGGTGGCGCAC  | 0   | 15 | RDR2-sensitive |
| ACAGACGTGGGGCAGGTGACGCAC  | 0   | 9  | RDR2-sensitive |
| ACAGACGTGGGGCAGGTGGCGCAC  | 2   | 41 | RDR2-sensitive |
| ACAGACGTTATAATGGATTAGTGA  | 21  | 1  | RDR2-resistant |
| ACAGACTACGCTCGGCCGATGCAG  | 0   | 10 | RDR2-sensitive |
| ACAGACTCAAAGCACGGCTCGACA  | 0   | 14 | RDR2-sensitive |
| ACAGACTCGGACGTGAGCGACGGA  | 0   | 10 | RDR2-sensitive |
| ACAGACTCTGCTCGGATCGGTCTA  | 0   | 23 | RDR2-sensitive |
| ACAGACTGTAGCGGCCACGTCAC   | 0   | 15 | RDR2-sensitive |
| ACAGACTTTAGTACCGTTTTTCGT  | 1   | 12 | RDR2-sensitive |
| ACAGAGCAGGACTGCAGGAGGGCG  | 0   | 21 | RDR2-sensitive |
| ACAGAGCCGTTGGACTCATGGCGC  | 0   | 16 | RDR2-sensitive |
| ACAGAGCTCGCACGCGCATAGCCT  | 1   | 34 | RDR2-sensitive |
| ACAGAGTGGGCTAACGACGACGGA  | 84  | 3  | RDR2-resistant |
| ACAGAGTGTCAGAGCAGAGGATAA  | 0   | 9  | RDR2-sensitive |
| ACAGATCCTTAGACTGTTTGGCGT  | 0   | 12 | RDR2-sensitive |
| ACAGATCGCTGAACGCTGACGGTG  | 1   | 22 | RDR2-sensitive |
| ACAGATCGGACTAGCACGGTTCAA  | 0   | 29 | RDR2-sensitive |
| ACAGATCTAAGACGAAGGGTCGG   | 0   | 18 | RDR2-sensitive |
| ACAGATCTGAACGCGTGGCGGCAC  | 0   | 10 | RDR2-sensitive |
| ACAGATGAGGATGTGCCGGATTCCG | 79  | 2  | RDR2-resistant |
| ACAGATGTGGTATAACTTGTTATC  | 15  | 0  | RDR2-resistant |
| ACAGATTACGGGCCGGTCCAACAC  | 0   | 10 | RDR2-sensitive |
| ACAGATTCCTGTGACTCGGCGAGC  | 0   | 21 | RDR2-sensitive |
| ACAGATTGATGGGCGGTACGGTAT  | 26  | 0  | RDR2-resistant |
| ACAGATTGCTGGTCGTGCTGGTCCG | 0   | 9  | RDR2-sensitive |
| ACAGCACGGCAGAGGACAAAGCAG  | 0   | 9  | RDR2-sensitive |
| ACAGCACTGTAGACACGGCTGCAG  | 0   | 15 | RDR2-sensitive |
| ACAGCAGATGGATAAGCTTGTAGA  | 18  | 1  | RDR2-resistant |
| ACAGCATGGACGAGCAGACACGAC  | 0   | 9  | RDR2-sensitive |
| ACAGCCGACGGCTGTCAGACTGGC  | 0   | 14 | RDR2-sensitive |
| ACAGCCGGCTGATAACGCGTGCAG  | 0   | 14 | RDR2-sensitive |
| ACAGCCGGCTGTACGTAGACGTCG  | 0   | 12 | RDR2-sensitive |
| ACAGCCTGAGCGCGCTGTCCGGCG  | 133 | 0  | RDR2-resistant |
| ACAGCCTGCTTGTGCTCCGTGCTC  | 37  | 0  | RDR2-resistant |
| ACAGCGAAGGTTTATGATTGTCGA  | 16  | 0  | RDR2-resistant |
| ACAGCGACAATTTACTCGTCGGTC  | 0   | 17 | RDR2-sensitive |

|                           |     |    |                |
|---------------------------|-----|----|----------------|
| ACAGCGCATCGGCTGGGAAGCATG  | 2   | 14 | RDR2-sensitive |
| ACAGCGGCTGGGAGGAGGGCCGAG  | 183 | 21 | RDR2-resistant |
| ACAGCGTTCGTTTGGTTGGCCGTA  | 0   | 9  | RDR2-sensitive |
| ACAGCTACTGTGAAACCGGCGTC   | 0   | 24 | RDR2-sensitive |
| ACAGCTAGCCGTTGACTGATGGC   | 0   | 23 | RDR2-sensitive |
| ACAGCTCTGCTTGCTGTGCGCGTG  | 0   | 9  | RDR2-sensitive |
| ACAGCTGAGCACGTGGACCGGCAC  | 0   | 11 | RDR2-sensitive |
| ACAGCTGCACATGAACGTAGACGA  | 0   | 13 | RDR2-sensitive |
| ACAGCTGCACGGTACTCCAAGTAT  | 0   | 19 | RDR2-sensitive |
| ACAGCTGCGTGGGACTTGGCGATA  | 0   | 9  | RDR2-sensitive |
| ACAGCTGCTGTGCTCGCCGATAA   | 0   | 11 | RDR2-sensitive |
| ACAGCTGTCAGACAGGTCGTTGGA  | 0   | 14 | RDR2-sensitive |
| ACAGCTTCGGATTCGGGTCGATA   | 0   | 17 | RDR2-sensitive |
| ACAGGAACTGTAAATTTTTACGGC  | 0   | 16 | RDR2-sensitive |
| ACAGGAACTTCAGGGACTTGGCGT  | 0   | 10 | RDR2-sensitive |
| ACAGGACAAAGCCAGGTGAGACAT  | 0   | 10 | RDR2-sensitive |
| ACAGGACAACCTGCTTGAGTCGGC  | 0   | 9  | RDR2-sensitive |
| ACAGGACAACGAGCAGACTGGTTT  | 0   | 9  | RDR2-sensitive |
| ACAGGACACCTAGGATCCGTCTTA  | 15  | 0  | RDR2-resistant |
| ACAGGACACGGCACGGCTAGACAC  | 0   | 55 | RDR2-sensitive |
| ACAGGACAGACGAAGGACAGACGA  | 0   | 11 | RDR2-sensitive |
| ACAGGACAGGACGGGATGAGACAA  | 0   | 9  | RDR2-sensitive |
| ACAGGACCCCACTCGGCAAAGACA  | 0   | 9  | RDR2-sensitive |
| ACAGGACCCTGCTGGAGCCAGCCG  | 0   | 15 | RDR2-sensitive |
| ACAGGACCCTGCTGGAGCCAGCCT  | 0   | 9  | RDR2-sensitive |
| ACAGGACCTTCGGCGACAAAGCAG  | 0   | 16 | RDR2-sensitive |
| ACAGGACGCACTCGGCAAAGACAA  | 0   | 12 | RDR2-sensitive |
| ACAGGACGCGCGGTAAGACTGAGC  | 0   | 11 | RDR2-sensitive |
| ACAGGACGGAAGCGAGCACGCCAA  | 0   | 9  | RDR2-sensitive |
| ACAGGACGGCCGAGGGCGCGATGA  | 0   | 11 | RDR2-sensitive |
| ACAGGACGGCGATTAGGCCTGCTA  | 47  | 4  | RDR2-resistant |
| ACAGGACGGCTGAAAGCACACAAT  | 0   | 36 | RDR2-sensitive |
| ACAGGACGGGACGGGACGAGACGA  | 0   | 15 | RDR2-sensitive |
| ACAGGACGGTTCGCGCTTCGGTGC  | 2   | 29 | RDR2-sensitive |
| ACAGGACGTACACGGGATATTCAG  | 0   | 11 | RDR2-sensitive |
| ACAGGACGTGTTAGCGGTTGTTGC  | 0   | 11 | RDR2-sensitive |
| ACAGGACTCAGGAAGAGAGACGAC  | 0   | 10 | RDR2-sensitive |
| ACAGGACTCGCTCGCGCAGGGCTG  | 0   | 22 | RDR2-sensitive |
| ACAGGACTGCAGAAGAATGGGCTA  | 0   | 47 | RDR2-sensitive |
| ACAGGACTGTAGGAGCATAGGTTA  | 0   | 14 | RDR2-sensitive |
| ACAGGAGCGGCTCCTTCTCTGCAC  | 0   | 15 | RDR2-sensitive |
| ACAGGAGGCAGAACCACGGTGCAT  | 0   | 10 | RDR2-sensitive |
| ACAGGAGGTTTCATGTGGACCGCGG | 18  | 0  | RDR2-resistant |
| ACAGGAGTACTTTGGGATGAGCAT  | 0   | 12 | RDR2-sensitive |
| ACAGGATATGGCTACATTGTTATT  | 18  | 0  | RDR2-resistant |
| ACAGGATCTTCGGCGACGAAGCAT  | 0   | 13 | RDR2-sensitive |
| ACAGGATGACGAACAAGGTGGCGA  | 0   | 16 | RDR2-sensitive |
| ACAGGATGTAGCCGGGTTAGACGA  | 0   | 9  | RDR2-sensitive |
| ACAGGCAACGTAGCATAGCACTCT  | 1   | 27 | RDR2-sensitive |

|                            |      |      |                |
|----------------------------|------|------|----------------|
| ACAGGCACGGCACGGATCTTCTAC   | 0    | 13   | RDR2-sensitive |
| ACAGGCACTGTAGGCTGTCCGGTG   | 0    | 17   | RDR2-sensitive |
| ACAGGCATGCTCGGCTACTCCAGT   | 38   | 0    | RDR2-resistant |
| ACAGGCCTGAGACAGACGCGCTGG   | 0    | 10   | RDR2-sensitive |
| ACAGGCCTTAGACTATATTCAACG   | 0    | 17   | RDR2-sensitive |
| ACAGGCCGACGGGACGGAAGAACAG  | 0    | 9    | RDR2-sensitive |
| ACAGGCCGAGTAGCGTGCCGACAAC  | 1    | 25   | RDR2-sensitive |
| ACAGGCTAAGCGGACGGTAAGCAC   | 0    | 9    | RDR2-sensitive |
| ACAGGCTCTGGACGACAGCCTGCA   | 0    | 10   | RDR2-sensitive |
| ACAGGCTGCAGCAGGCTACAACCT   | 0    | 10   | RDR2-sensitive |
| ACAGGGCAGTAGCTGAGAAAGCGG   | 0    | 13   | RDR2-sensitive |
| ACAGGGCCTCGGATTTTACTGGCA   | 0    | 11   | RDR2-sensitive |
| ACAGGGCTTGTAGAGAGGTTGTAA   | 0    | 29   | RDR2-sensitive |
| ACAGGGGGCTCTCGGCAAAGACAC   | 0    | 10   | RDR2-sensitive |
| ACAGGGGTCTGTGTCTTCTGGGC    | 0    | 10   | RDR2-sensitive |
| ACAGGGTCAGACTGTCCACGACAT   | 0    | 14   | RDR2-sensitive |
| ACAGGGTTGTCTGAGGTCTGTTGG   | 0    | 27   | RDR2-sensitive |
| ACAGGTACTGCCTAGAGGGGCTAA   | 0    | 10   | RDR2-sensitive |
| ACAGGTACTGTAGACTGTCCGGTG   | 0    | 11   | RDR2-sensitive |
| ACAGGTACTGTTCACTGTCCGGTG   | 0    | 10   | RDR2-sensitive |
| ACAGGTACTGTTTGATGTCCGGTG   | 0    | 22   | RDR2-sensitive |
| ACAGGTAGGCACTCGGCAAAGACA   | 1    | 18   | RDR2-sensitive |
| ACAGGTCAAAGGCAGAACGGTCAA   | 1    | 41   | RDR2-sensitive |
| ACAGGTCAGAACGGAAGCAACCAC   | 0    | 24   | RDR2-sensitive |
| ACAGGTCCTGTAGACTGTCCGGTG   | 2    | 78   | RDR2-sensitive |
| ACAGGTCGGTCTGAGCCCGCCGGA   | 3    | 17   | RDR2-sensitive |
| ACAGGTCTGACGAGCTGACACGGT   | 0    | 32   | RDR2-sensitive |
| ACAGGTCTGGCGAGCTGACGCGGT   | 0    | 23   | RDR2-sensitive |
| ACAGGTGACTGCAGAGAGGAGGTT   | 0    | 21   | RDR2-sensitive |
| ACAGGTGCACTGGTAGAACAACGG   | 0    | 9    | RDR2-sensitive |
| ACAGGTGGTGGACTTCCGGATCGT   | 5    | 36   | RDR2-sensitive |
| ACAGGTTTCGTTCGTGCCTCCGGCCC | 0    | 9    | RDR2-sensitive |
| ACAGGTTCTCTGGAGGACATGGTT   | 9    | 25   | RDR2-sensitive |
| ACAGGTTGTTGATATGGCATGTGA   | 0    | 9    | RDR2-sensitive |
| ACAGGTTTGTGTCGGGATAAAAT    | 122  | 0    | RDR2-resistant |
| ACAGTAACTGTCACGGTCGTCCC    | 2335 | 2263 | RDR2-sensitive |
| ACAGTAACTCTGCAAGGTGGGACC   | 0    | 11   | RDR2-sensitive |
| ACAGTACATCGGCAAACAGGGGCG   | 0    | 11   | RDR2-sensitive |
| ACAGTACCGTTGGATGTAGATGGT   | 0    | 15   | RDR2-sensitive |
| ACAGTACTGTCTCAGGTCCGCGAC   | 1    | 14   | RDR2-sensitive |
| ACAGTAGAACCGGACATTCGGCCA   | 0    | 11   | RDR2-sensitive |
| ACAGTAGAATAAGCGGACGGGCTT   | 0    | 30   | RDR2-sensitive |
| ACAGTAGGATTGTCGGCACTACAA   | 0    | 9    | RDR2-sensitive |
| ACAGTATCGTACTTGGACAGGCAA   | 0    | 23   | RDR2-sensitive |
| ACAGTATCTGGGTAATCGGACAAT   | 0    | 15   | RDR2-sensitive |
| ACAGTATGGGACAGCGACCAGCAC   | 0    | 13   | RDR2-sensitive |
| ACAGTCAAGACATGCGGAGGACAT   | 0    | 40   | RDR2-sensitive |
| ACAGTCACTGTAGACGGTCCGGTG   | 4    | 21   | RDR2-sensitive |
| ACAGTCACTGTAGCTGTCCGGTGC   | 0    | 12   | RDR2-sensitive |

|                           |    |    |                |
|---------------------------|----|----|----------------|
| ACAGTCAGTAGACCGGCATGACGT  | 0  | 9  | RDR2-sensitive |
| ACAGTCCTGACTATAGATGGCCAA  | 0  | 10 | RDR2-sensitive |
| ACAGTCGAATCGGCAACAAAGCGT  | 1  | 17 | RDR2-sensitive |
| ACAGTCGACTGCTACAGACCCCAA  | 0  | 9  | RDR2-sensitive |
| ACAGTCGACTTAGAATGAAGATGG  | 0  | 15 | RDR2-sensitive |
| ACAGTCGGCTCTCGGCAAAGATGC  | 0  | 11 | RDR2-sensitive |
| ACAGTCGGTGCACCACAAGCGGTT  | 1  | 25 | RDR2-sensitive |
| ACAGTCTAGAACTCTCGCGGCTGT  | 0  | 16 | RDR2-sensitive |
| ACAGTCTCCGCTGCAGAAGGTGTT  | 0  | 55 | RDR2-sensitive |
| ACAGTCTGATTTGTAGTAGGGCTG  | 0  | 10 | RDR2-sensitive |
| ACAGTCTGGTATAGTCGGTGCCT   | 0  | 21 | RDR2-sensitive |
| ACAGTGACACGCTAGATCTAGGGG  | 0  | 12 | RDR2-sensitive |
| ACAGTGACACGCTAGATCTGGGGA  | 0  | 17 | RDR2-sensitive |
| ACAGTGACACGCTAGATCTGGGGG  | 0  | 24 | RDR2-sensitive |
| ACAGTGACTCTGTTCTTCTTGCCA  | 0  | 14 | RDR2-sensitive |
| ACAGTGACTGTACGGTGCGCCACC  | 0  | 12 | RDR2-sensitive |
| ACAGTGCGGACCAGTGTTGGGCAT  | 0  | 18 | RDR2-sensitive |
| ACAGTGGTCTGGGTGGTCTTCGAA  | 14 | 0  | RDR2-resistant |
| ACAGTGTATAGCGCATGTAGACGT  | 0  | 17 | RDR2-sensitive |
| ACAGTGTCGCGACTGAATCGTCAT  | 0  | 10 | RDR2-sensitive |
| ACAGTGTCGTGCTTGGGCAGTCAG  | 0  | 10 | RDR2-sensitive |
| ACAGTGTTGGGAGGTGAGAGACGC  | 0  | 26 | RDR2-sensitive |
| ACAGTTCAGATCGTTGGATAATAC  | 0  | 12 | RDR2-sensitive |
| ACAGTTGTAGATCTTTATTGCAGA  | 0  | 10 | RDR2-sensitive |
| ACAGTTGTTGGCTAGATTCGCGGA  | 0  | 13 | RDR2-sensitive |
| ACAGTTTAGCTGTTTTTCGATCGT  | 0  | 12 | RDR2-sensitive |
| ACAGTTTAGGCAGACATACTGAAG  | 38 | 3  | RDR2-resistant |
| ACAGTTTGACGTTAGTATAATAGT  | 18 | 1  | RDR2-resistant |
| ACAGTTTGACTCGATCGATACGGT  | 1  | 15 | RDR2-sensitive |
| ACAGTTTTTAATGTAGAATCAGGA  | 35 | 3  | RDR2-resistant |
| ACATAAGAAGCTAATGTAGACGTT  | 0  | 16 | RDR2-sensitive |
| ACATAAGCCCGTTGGACCGGCAGC  | 0  | 15 | RDR2-sensitive |
| ACATAAGCTTATGTCTGACGGTCT  | 1  | 21 | RDR2-sensitive |
| ACATAAGGCTATGTCTGACGGTTG  | 0  | 9  | RDR2-sensitive |
| ACATAAGTACACGGACGCAGGCAC  | 0  | 11 | RDR2-sensitive |
| ACATAAGTCGAAGACAGCATGTAG  | 0  | 9  | RDR2-sensitive |
| ACATACACGTTTGGACCACGCATA  | 1  | 60 | RDR2-sensitive |
| ACATACAGACTACGCTCGGCCGAT  | 0  | 13 | RDR2-sensitive |
| ACATACCGTCGTAATGTATGGGCA  | 0  | 52 | RDR2-sensitive |
| ACATACGACAGGATCGGCTCGGCT  | 0  | 10 | RDR2-sensitive |
| ACATACGACGCGGCGACGAACGAC  | 0  | 10 | RDR2-sensitive |
| ACATACGGTGCTGTCAGCGACGCG  | 73 | 3  | RDR2-resistant |
| ACATACGTTATTTTTTCGTCGGT   | 1  | 31 | RDR2-sensitive |
| ACATACTGCACTGTAGTAGGCTAC  | 0  | 15 | RDR2-sensitive |
| ACATAGATCTGATTCCTGGAACGG  | 14 | 0  | RDR2-resistant |
| ACATAGGGGCGCTGTAGGGGGCAC  | 0  | 25 | RDR2-sensitive |
| ACATAGGTTCCGGCCTGGGTGCATT | 0  | 42 | RDR2-sensitive |
| ACATAGTTTATGTGTAGTTCGGTA  | 31 | 5  | RDR2-resistant |
| ACATATAATCGGTTGAGTCGTCGC  | 3  | 18 | RDR2-sensitive |

|                           |     |    |                |
|---------------------------|-----|----|----------------|
| ACATATATCGCGTGATTGGACGTC  | 0   | 12 | RDR2-sensitive |
| ACATATCCAAGATGGACTGGGCTT  | 0   | 14 | RDR2-sensitive |
| ACATATCGGATTCGTA TAGGCC   | 0   | 24 | RDR2-sensitive |
| ACATATCGTCAGTAGGTCGTCGAC  | 0   | 15 | RDR2-sensitive |
| ACATATCTAATTATGGGTCGTGCT  | 198 | 1  | RDR2-resistant |
| ACATATTCGGGCTTCTTGCGGATC  | 41  | 8  | RDR2-resistant |
| ACATATTCTGAACAATGTGTAGAA  | 0   | 11 | RDR2-sensitive |
| ACATCACCTTCAGGTCGTCTGGC   | 0   | 12 | RDR2-sensitive |
| ACATCAGACCTGCGAGGACGTCGT  | 2   | 23 | RDR2-sensitive |
| ACATCATCGGATGGTCCGGCCATA  | 0   | 12 | RDR2-sensitive |
| ACATCCACGGGCTAGCAGGCGGGT  | 0   | 15 | RDR2-sensitive |
| ACATCCAGA ACTCTGCAGGTAGAG | 0   | 10 | RDR2-sensitive |
| ACATCGGGCGACGGATCCGGCTTC  | 3   | 22 | RDR2-sensitive |
| ACATCGGGCGGGAGACGCAGACAT  | 0   | 23 | RDR2-sensitive |
| ACATCGTGGACAGAGCATGGGCAT  | 0   | 11 | RDR2-sensitive |
| ACATCGTTATATTTGTAGAGTGGC  | 0   | 73 | RDR2-sensitive |
| ACATCTAGTAGAGCGTGATAGCCG  | 0   | 12 | RDR2-sensitive |
| ACATCTATAGGGTTGTCTGATGTC  | 0   | 11 | RDR2-sensitive |
| ACATCTCCTGTGA ACTAGACTGGC | 0   | 9  | RDR2-sensitive |
| ACATCTTTGTGA ACCAGACTGGC  | 0   | 9  | RDR2-sensitive |
| ACATCTGATGTGGATCGCGGTAGC  | 32  | 1  | RDR2-resistant |
| ACATCTGTATCTAGGGCTGGGCAT  | 0   | 19 | RDR2-sensitive |
| ACATCTTAGGACTTAGGGCGGGTG  | 0   | 20 | RDR2-sensitive |
| ACATCTTTGTATGATTGGTGGACG  | 0   | 22 | RDR2-sensitive |
| ACATCTTTGTTTGTGGAGGCT     | 14  | 0  | RDR2-resistant |
| ACATGACTGCAGAGGATTGTGGTA  | 0   | 18 | RDR2-sensitive |
| ACATGACTGTAGAGGATTGTGGTA  | 0   | 13 | RDR2-sensitive |
| ACATGAGAATGGACTGTGCGGGGA  | 0   | 12 | RDR2-sensitive |
| ACATGAGGACTACCAGATCGTGCC  | 0   | 27 | RDR2-sensitive |
| ACATGAGTTACTGGCCGTCGGAT   | 0   | 16 | RDR2-sensitive |
| ACATGATCGGACACACGTGGGTAT  | 0   | 9  | RDR2-sensitive |
| ACATGCACTGTAGAGTGTCCGGTG  | 16  | 35 | RDR2-sensitive |
| ACATGCAGAGGACACGGGAAACTC  | 1   | 12 | RDR2-sensitive |
| ACATGCAGGTCGGTATCGTTACAT  | 0   | 20 | RDR2-sensitive |
| ACATGCAGTTGAACTGGTCCCTCGG | 0   | 11 | RDR2-sensitive |
| ACATGCCCGTTTATGTGTCGGACC  | 0   | 14 | RDR2-sensitive |
| ACATGCGTCGCTGTGTTCCGGCAAG | 0   | 10 | RDR2-sensitive |
| ACATGCGTTCGGTCTAGATGGATG  | 0   | 17 | RDR2-sensitive |
| ACATGCTATATGTAGGATTCGGCA  | 0   | 10 | RDR2-sensitive |
| ACATGCTCGGGCTGGGTCGGGCCG  | 0   | 32 | RDR2-sensitive |
| ACATGCTTGTTCCGGACGACGCATA | 0   | 12 | RDR2-sensitive |
| ACATGGACCGATGAGGCACGACAT  | 0   | 21 | RDR2-sensitive |
| ACATGGACCTGATGGCTTTAATGG  | 16  | 0  | RDR2-resistant |
| ACATGGACGTAGGATGGACGGTGG  | 0   | 10 | RDR2-sensitive |
| ACATGGACTGAAGTTTTATGGTA   | 39  | 3  | RDR2-resistant |
| ACATGGACTGTAGGAGCGGGGTTT  | 0   | 11 | RDR2-sensitive |
| ACATGGATTTGTTGATGGATTTAA  | 0   | 30 | RDR2-sensitive |
| ACATGGCCAGAAGACGAACCTCTT  | 0   | 15 | RDR2-sensitive |
| ACATGGCGTCGGATCTGCCGGTAC  | 0   | 11 | RDR2-sensitive |

|                           |     |     |                |
|---------------------------|-----|-----|----------------|
| ACATGGCTGAAGTAAGAGACAACA  | 43  | 5   | RDR2-resistant |
| ACATGGCTGTTCCGGATGATCGCAT | 30  | 3   | RDR2-resistant |
| ACATGGGAGATGCTGACATGACGT  | 31  | 1   | RDR2-resistant |
| ACATGGTTGTTCCGGATGATCGCAT | 71  | 5   | RDR2-resistant |
| ACATGGTTTTGTAGAGCATGGTAT  | 0   | 26  | RDR2-sensitive |
| ACATGTACGTGCATGCCGCGTCGG  | 0   | 9   | RDR2-sensitive |
| ACATGTACTGTAGAGTGTCCGGTG  | 8   | 90  | RDR2-sensitive |
| ACATGTATGAACGTTTTTTGGAT   | 15  | 0   | RDR2-resistant |
| ACATGTCAGACACGTAGAGGTGGT  | 0   | 16  | RDR2-sensitive |
| ACATGTCAGAGGCAGAACGGCAGA  | 0   | 20  | RDR2-sensitive |
| ACATGTCGCGTAGGACAGTTCGGC  | 0   | 19  | RDR2-sensitive |
| ACATGTCGTGTGTTTAGGTTTACC  | 46  | 0   | RDR2-resistant |
| ACATGTCGTTGCTGGAGTTGGCAT  | 0   | 12  | RDR2-sensitive |
| ACATGTCGTTGTAGTTGCAGGCAC  | 0   | 47  | RDR2-sensitive |
| ACATGTCTGGCTAAAGCATCGGTT  | 0   | 15  | RDR2-sensitive |
| ACATGTGTTTGTGTTGATCGTCAA  | 0   | 10  | RDR2-sensitive |
| ACATGTTCCGGTGCATACATAGATT | 0   | 9   | RDR2-sensitive |
| ACATGTTGAGGTGTTCCGCTGGAT  | 0   | 14  | RDR2-sensitive |
| ACATGTTGGATAAAATGGCGTGAG  | 660 | 132 | RDR2-resistant |
| ACATGTTGTGATTTGACTTGGCAT  | 0   | 33  | RDR2-sensitive |
| ACATGTTTGGATGGCTGCACGCGA  | 0   | 16  | RDR2-sensitive |
| ACATGTTTGGTTCATGGACGGTGT  | 0   | 9   | RDR2-sensitive |
| ACATTAGGGTAGGATACGGGATGA  | 0   | 24  | RDR2-sensitive |
| ACATTCCGGCGAGAACACGGGTCAT | 0   | 10  | RDR2-sensitive |
| ACATTCTAACGGCTGGTCTCGGTA  | 71  | 3   | RDR2-resistant |
| ACATTCTGCGTGATTGGTTGGCTC  | 0   | 9   | RDR2-sensitive |
| ACATTCTGTGTTGTGCTCTATCGT  | 0   | 23  | RDR2-sensitive |
| ACATTGAAGACGTGGGCTGCACAA  | 0   | 39  | RDR2-sensitive |
| ACATTGGATACGTGCTGCCTCAGA  | 23  | 0   | RDR2-resistant |
| ACATTGGATTATACAGACTGCA    | 0   | 49  | RDR2-sensitive |
| ACATTGGTCAGTTCGGATCGGGTG  | 0   | 9   | RDR2-sensitive |
| ACATTGGTGGTACGCTGGACTAAC  | 0   | 14  | RDR2-sensitive |
| ACATTGGTTATCATGTGCTTTCTG  | 32  | 0   | RDR2-resistant |
| ACATTGTAATTGGACTTTCGGTAT  | 1   | 167 | RDR2-sensitive |
| ACATTGTGGGCAGTGAAGATGGAG  | 124 | 3   | RDR2-resistant |
| ACATTGTTGGATGGATACAGGGGC  | 1   | 21  | RDR2-sensitive |
| ACATTTAAGACTGAGACATACCGG  | 0   | 9   | RDR2-sensitive |
| ACATTTATGAGGGATCGTCCTACT  | 19  | 1   | RDR2-resistant |
| ACATTTATGGCTAGGCTCGTTGGC  | 0   | 17  | RDR2-sensitive |
| ACATTTATTTTTGACGATCGGTG   | 41  | 5   | RDR2-resistant |
| ACATTTCATTGTGCGAGCTGGATA  | 30  | 0   | RDR2-resistant |
| ACATTTGAGGACGACGAAGGCAC   | 0   | 9   | RDR2-sensitive |
| ACATTTCCGGGCTGACACGTCACGG | 0   | 43  | RDR2-sensitive |
| ACATTTGAAAGTGATTGTTGGTCA  | 44  | 10  | RDR2-resistant |
| ACATTTGGAGGGTAGACGATGGCT  | 0   | 22  | RDR2-sensitive |
| ACATTTTGTGTTGGTTGTTGGATAA | 0   | 15  | RDR2-sensitive |
| ACATTTTTGTACATGAGACTGCT   | 49  | 3   | RDR2-resistant |
| ACCAAACAAGCGGCAAAGTAGCAC  | 0   | 15  | RDR2-sensitive |
| ACCAAACACAGAACAGAGCGGCTC  | 3   | 97  | RDR2-sensitive |

|                           |    |    |                |
|---------------------------|----|----|----------------|
| ACCAAACACTCGGCGAATGACGAC  | 0  | 18 | RDR2-sensitive |
| ACCAAACCGGGTCGGGCTAGGCTT  | 0  | 12 | RDR2-sensitive |
| ACCAAACCTTCACGCGTCGGGTCGA | 0  | 12 | RDR2-sensitive |
| ACCAAAGACTGGATGTAGGGACGT  | 0  | 12 | RDR2-sensitive |
| ACCAAAGGCTGTGGCGATGAGGGA  | 0  | 17 | RDR2-sensitive |
| ACCAAAGGCTGTGGCGATGAGGTA  | 0  | 14 | RDR2-sensitive |
| ACCAAATGTGTCTCGCGGACGGTC  | 0  | 9  | RDR2-sensitive |
| ACCAAATTGAGCGGGCGGACGGTC  | 0  | 14 | RDR2-sensitive |
| ACCAAATTTTATGTGGGTCTGGAC  | 0  | 9  | RDR2-sensitive |
| ACCAACGACTGCAGCGAAGGCCTC  | 0  | 10 | RDR2-sensitive |
| ACCAACGAGGATTAGTCGGGACCT  | 0  | 33 | RDR2-sensitive |
| ACCAACGGAGACAAGACGACGGAC  | 0  | 11 | RDR2-sensitive |
| ACCAACGGAGACAAGACGACTGGC  | 0  | 31 | RDR2-sensitive |
| ACCAACGTAGATCGCTGAAGGCAC  | 0  | 10 | RDR2-sensitive |
| ACCAACTCTGGCCAGGCACACCGA  | 0  | 10 | RDR2-sensitive |
| ACCAACTCTGGCCAGGCACACCGG  | 0  | 11 | RDR2-sensitive |
| ACCAACTGGATCAGGCTGTTCGGTT | 0  | 16 | RDR2-sensitive |
| ACCAAGACGGTTCTCCAAGCACAA  | 0  | 9  | RDR2-sensitive |
| ACCAAGAGGGAGATCGTGACCGGC  | 0  | 10 | RDR2-sensitive |
| ACCAAGCCTGATGACGTAAC      | 0  | 16 | RDR2-sensitive |
| ACCAAGCGTAGTACACTCGGCATA  | 0  | 9  | RDR2-sensitive |
| ACCAAGGCTGGGACTAACAGTGGC  | 0  | 19 | RDR2-sensitive |
| ACCAAGTAGCAACAGACGCCTCAC  | 1  | 18 | RDR2-sensitive |
| ACCAAGTCGCAGTAGAGAACCGGT  | 0  | 14 | RDR2-sensitive |
| ACCAAGTCTTCGGAACGGCTCCAG  | 0  | 9  | RDR2-sensitive |
| ACCAAGTTGCTCGGACAGCGTCAG  | 0  | 12 | RDR2-sensitive |
| ACCAATCTGGCGATGACGGGCTGC  | 0  | 9  | RDR2-sensitive |
| ACCAATGACTGGAAGTAGGGACGT  | 0  | 47 | RDR2-sensitive |
| ACCAATGACTGTAAGCAGGGACGT  | 0  | 22 | RDR2-sensitive |
| ACCAATTGGACTGTTACACCGGAT  | 0  | 9  | RDR2-sensitive |
| ACCAATTGGGCCTGTAGTGTTCGGC | 0  | 10 | RDR2-sensitive |
| ACCAATTGTTAGAACCGGCCCTG   | 0  | 20 | RDR2-sensitive |
| ACCACACCAGGTTGTGAACGTCTA  | 0  | 10 | RDR2-sensitive |
| ACCACACTCGGTGCATACTGGACA  | 0  | 12 | RDR2-sensitive |
| ACCACACTGAACAGCAGAGAGCTC  | 0  | 18 | RDR2-sensitive |
| ACCACACTGAACAGGAGAGAGCTC  | 0  | 17 | RDR2-sensitive |
| ACCACAGTAGAGCGCATGATTGGC  | 0  | 10 | RDR2-sensitive |
| ACCACATAGCGGTGTTCTCTGCGG  | 0  | 15 | RDR2-sensitive |
| ACCACATGTCGGTCAGTTTTCGGT  | 0  | 9  | RDR2-sensitive |
| ACCACATTGTGTCGGGCCATGCAT  | 0  | 23 | RDR2-sensitive |
| ACCACCAATGACTGTAAGCAGGGA  | 0  | 9  | RDR2-sensitive |
| ACCACCACGCTAGCTGAAGGACGA  | 0  | 10 | RDR2-sensitive |
| ACCACCCAGAGTAGGTCGTCACGG  | 0  | 13 | RDR2-sensitive |
| ACCACCCTAAGGGATTGTTTCGGAT | 0  | 11 | RDR2-sensitive |
| ACCACCTGTAGCCTGACGGTGACC  | 0  | 24 | RDR2-sensitive |
| ACCACCTGTTATGAACCTTGTCGG  | 25 | 3  | RDR2-resistant |
| ACCACGACTGCATGCAACTACCAC  | 0  | 20 | RDR2-sensitive |
| ACCACGCGACGTAGATCCAAGCGG  | 0  | 11 | RDR2-sensitive |
| ACCACGCTAGCTGAAGGACGACGA  | 0  | 10 | RDR2-sensitive |

|                           |    |     |                |
|---------------------------|----|-----|----------------|
| ACCACGCTGGTAAGACGGGAACAC  | 0  | 47  | RDR2-sensitive |
| ACCACGGATGGGTGTGACGTCTAC  | 0  | 14  | RDR2-sensitive |
| ACCACGGATTGTCCGGACCGCGGA  | 0  | 10  | RDR2-sensitive |
| ACCACGTGACAGAAAGCGGAACAA  | 0  | 16  | RDR2-sensitive |
| ACCACGTGACTGCTACGCCGGAAC  | 0  | 9   | RDR2-sensitive |
| ACCACTAGACGTGTAGGGCAGCGG  | 0  | 9   | RDR2-sensitive |
| ACCACTCGTCGCAGCTCTGGCCGG  | 0  | 9   | RDR2-sensitive |
| ACCACTGCGGGAGATGAAAAAGTA  | 2  | 23  | RDR2-sensitive |
| ACCACTGGACTCGGTTCTTCGGTT  | 33 | 0   | RDR2-resistant |
| ACCACTGGGCTGTATAAACCGCGG  | 0  | 12  | RDR2-sensitive |
| ACCACTGTAGCAGCTTTAGCGGTC  | 1  | 15  | RDR2-sensitive |
| ACCACTGTAGCGCGTAGAGGATGA  | 0  | 20  | RDR2-sensitive |
| ACCACTGTAGGATTACGGGGAGGC  | 0  | 10  | RDR2-sensitive |
| ACCACTTCAGACAAGTGGGTCCGA  | 1  | 31  | RDR2-sensitive |
| ACCACTTGTGAGCAGACTGGGCGT  | 0  | 9   | RDR2-sensitive |
| ACCAGAAACCTGATTCGCCGGCAC  | 0  | 9   | RDR2-sensitive |
| ACCAGAAATGAGCCGGCGGACTGT  | 0  | 10  | RDR2-sensitive |
| ACCAGAACCAGATCGAGCGCGCGT  | 0  | 33  | RDR2-sensitive |
| ACCAGACGAGTAGACGACGCGAGT  | 0  | 9   | RDR2-sensitive |
| ACCAGACTGGCCACATACACAAA   | 0  | 34  | RDR2-sensitive |
| ACCAGACTGGTAGAGAGGGCAGAG  | 0  | 9   | RDR2-sensitive |
| ACCAGACTGTCCGGTGCGCCATGC  | 0  | 9   | RDR2-sensitive |
| ACCAGAGACTGTTTCTCCCGGC    | 0  | 10  | RDR2-sensitive |
| ACCAGAGATGGACTGTCTGGCGGT  | 0  | 27  | RDR2-sensitive |
| ACCAGAGCTGGCATGTGGACCTAA  | 0  | 9   | RDR2-sensitive |
| ACCAGAGGTGATTGTAGGGGCTAA  | 0  | 14  | RDR2-sensitive |
| ACCAGATACGAGCAGATTGGTCCG  | 0  | 9   | RDR2-sensitive |
| ACCAGATCGGGGTGATGAAGTCGG  | 0  | 20  | RDR2-sensitive |
| ACCAGATCGTTTGATTGCATGGTT  | 0  | 21  | RDR2-sensitive |
| ACCAGATTAGTAGGAGCCGCGTTC  | 0  | 17  | RDR2-sensitive |
| ACCAGCACACGATCGGACGCGCGT  | 0  | 19  | RDR2-sensitive |
| ACCAGCGACTGCAGCGAAAGGCGA  | 1  | 86  | RDR2-sensitive |
| ACCAGCGACTGCAGCGAAATGCGA  | 0  | 10  | RDR2-sensitive |
| ACCAGCGACTGCAGCGAAGACCTC  | 0  | 13  | RDR2-sensitive |
| ACCAGCGACTGCAGCGAAGGCCTC  | 3  | 153 | RDR2-sensitive |
| ACCAGCGACTGCAGCGAGAGACGA  | 0  | 167 | RDR2-sensitive |
| ACCAGCGACTGCAGTGAAAGGCGA  | 0  | 22  | RDR2-sensitive |
| ACCAGCGATGGTGTTCTCTGCGGC  | 1  | 12  | RDR2-sensitive |
| ACCAGCTCGGCTCGTAGTGTCCGG  | 0  | 9   | RDR2-sensitive |
| ACCAGCTCGGCTCGTAGTGTCCGGT | 1  | 48  | RDR2-sensitive |
| ACCAGCTGAGAATTAGGCGTCTTG  | 3  | 93  | RDR2-sensitive |
| ACCAGCTGTGACGGAACCTCCCAA  | 2  | 54  | RDR2-sensitive |
| ACCAGGACCTGCTGCGCAACACGG  | 0  | 12  | RDR2-sensitive |
| ACCAGGACGTAGGGTATAACGCAT  | 2  | 20  | RDR2-sensitive |
| ACCAGGACGTAGGGTATTACGCAT  | 0  | 18  | RDR2-sensitive |
| ACCAGGACGTAGGGTGTTACGCAC  | 0  | 14  | RDR2-sensitive |
| ACCAGGACGTAGGGTGTTACGCAT  | 7  | 303 | RDR2-sensitive |
| ACCAGGAGAGGGACGAGAGGGACC  | 39 | 1   | RDR2-resistant |
| ACCAGGATGTAGGGTGTTACGCAT  | 0  | 13  | RDR2-sensitive |



|                           |    |     |                |
|---------------------------|----|-----|----------------|
| ACCAGGCACGGCACGACAGGACAC  | 0  | 14  | RDR2-sensitive |
| ACCAGGGAACAGTAGCACAACGGT  | 0  | 13  | RDR2-sensitive |
| ACCAGGGACAGTAGGAGGGCCGAG  | 0  | 10  | RDR2-sensitive |
| ACCAGGGTCCCACCACGTCGTCGC  | 0  | 10  | RDR2-sensitive |
| ACCAGGTCGATAGGTGGTTGGGGC  | 0  | 9   | RDR2-sensitive |
| ACCAGGTCGCGGACCGTCCGGCCC  | 20 | 103 | RDR2-sensitive |
| ACCAGGTCGCGGACTGTCCGGCCC  | 5  | 26  | RDR2-sensitive |
| ACCAGGTCGTGACTGAGCTGCCGG  | 0  | 10  | RDR2-sensitive |
| ACCAGGTCGTGTCGGGCTTGCGGG  | 0  | 13  | RDR2-sensitive |
| ACCAGGTGTGGACGCTGACGGTAC  | 1  | 129 | RDR2-sensitive |
| ACCAGGTTGGCGAGAAACAGGCAA  | 0  | 22  | RDR2-sensitive |
| ACCAGGTTGTAGAGTAATCGGCC   | 0  | 24  | RDR2-sensitive |
| ACCAGTAACGGTAGTAGATGGCAT  | 0  | 16  | RDR2-sensitive |
| ACCAGTCGTGTAGGACAGTTCGGT  | 0  | 13  | RDR2-sensitive |
| ACCAGTCTGTAGGGGTGGTCGGCC  | 0  | 20  | RDR2-sensitive |
| ACCAGTTGGAAGTGTTCGGGTAAC  | 0  | 20  | RDR2-sensitive |
| ACCAGTTTGAAGGGGTGGTCGGCC  | 1  | 28  | RDR2-sensitive |
| ACCAGTTTGCAGGGGTGGTCGGCC  | 0  | 33  | RDR2-sensitive |
| ACCAGTTTGTAGGGATGGTCGGCC  | 0  | 33  | RDR2-sensitive |
| ACCAGTTTGTAGGGATGGTCGGTC  | 0  | 9   | RDR2-sensitive |
| ACCAGTTTGTAGGGGTGGTCGGCC  | 0  | 40  | RDR2-sensitive |
| ACCATAAAGTTTGTAGCACGGGTG  | 49 | 1   | RDR2-resistant |
| ACCATAAGCAGTAGGCACTCGCGT  | 0  | 18  | RDR2-sensitive |
| ACCATACTGTAATTCGCGCGGACT  | 0  | 13  | RDR2-sensitive |
| ACCATAGACTATGACGACGAGCTG  | 0  | 54  | RDR2-sensitive |
| ACCATAGCTCATGGACGGTAACAG  | 0  | 12  | RDR2-sensitive |
| ACCATAGGCTGGTCTGAACGGCAA  | 1  | 16  | RDR2-sensitive |
| ACCATAGTTGACTGGGAGACGACG  | 0  | 9   | RDR2-sensitive |
| ACCATATCGCGAGAGCTCCGGCAG  | 0  | 9   | RDR2-sensitive |
| ACCATATCGCTTCGTGCGGGGCTT  | 0  | 19  | RDR2-sensitive |
| ACCATCACATATCGGGGTGTTGG   | 0  | 9   | RDR2-sensitive |
| ACCATCAGCGTGGGCCGTCCGGAC  | 0  | 11  | RDR2-sensitive |
| ACCATCAGTGCGGATTGTCCGGAC  | 0  | 9   | RDR2-sensitive |
| ACCATCATTATCGTGCGGAGGTAT  | 3  | 22  | RDR2-sensitive |
| ACCATCCGGATCTAGAACGCGCAT  | 0  | 57  | RDR2-sensitive |
| ACCATCCGGCCTCTGACCACGGAC  | 0  | 9   | RDR2-sensitive |
| ACCATCCGGTCTGTGGATAGAGGA  | 0  | 18  | RDR2-sensitive |
| ACCATCGAGTTGCGATTGTGCGCG  | 0  | 10  | RDR2-sensitive |
| ACCATCGCAGGACTGACCGGCTGC  | 72 | 0   | RDR2-resistant |
| ACCATCGCGGGCTGTACGACGGTT  | 0  | 26  | RDR2-sensitive |
| ACCATCGGACATAAGCCTTCGGCC  | 0  | 15  | RDR2-sensitive |
| ACCATCGGGCTGGTTCGGTGCACC  | 0  | 21  | RDR2-sensitive |
| ACCATCGGTGTCCGATCTGACGGC  | 0  | 15  | RDR2-sensitive |
| ACCATCGTCTACTTATACGGTCC   | 0  | 9   | RDR2-sensitive |
| ACCATCGTGGATTGTTCCGGCCCAG | 0  | 12  | RDR2-sensitive |
| ACCATGATGGTAGAAATTCGTCCG  | 0  | 13  | RDR2-sensitive |
| ACCATGCTCTGTGAACTCGCGGCT  | 14 | 0   | RDR2-resistant |
| ACCATGCTGCTTGGGACCGACGGA  | 0  | 10  | RDR2-sensitive |
| ACCATGGACGCATGCGGACTCGA   | 0  | 14  | RDR2-sensitive |

|                           |    |    |                |
|---------------------------|----|----|----------------|
| ACCATGTTTGGGAGAGGCTGACAG  | 0  | 10 | RDR2-sensitive |
| ACCATTAATGGCATGGTCCGGTCGG | 0  | 15 | RDR2-sensitive |
| ACCATTAGATCTAGATCGGATGCA  | 2  | 45 | RDR2-sensitive |
| ACCATTAGTTTCACCGGTCGTCGT  | 0  | 21 | RDR2-sensitive |
| ACCATTGGACTCGGTTCTTCGGTT  | 21 | 1  | RDR2-resistant |
| ACCATTGGACTGTCCGGTGTGCCC  | 1  | 27 | RDR2-sensitive |
| ACCATTGGGTCTTGATCGGATGTT  | 0  | 10 | RDR2-sensitive |
| ACCATTGTAAGTACTGTGACGGAA  | 1  | 13 | RDR2-sensitive |
| ACCATTTAAGATCATGTTCCGGTTC | 0  | 9  | RDR2-sensitive |
| ACCATTTAGCTACAGTCGGCGACA  | 2  | 21 | RDR2-sensitive |
| ACCATTTGTCTAGGTTGTTGGACC  | 59 | 4  | RDR2-resistant |
| ACCATTTGTGGCACTGAGCACGGT  | 1  | 24 | RDR2-sensitive |
| ACCATTTTATGGGTGAGAGGACTG  | 14 | 0  | RDR2-resistant |
| ACCATTTTGCTACAGTCGGCGACA  | 0  | 17 | RDR2-sensitive |
| ACCCAAAGTTGACTGGGAGACGAC  | 1  | 31 | RDR2-sensitive |
| ACCCAAGACGGATCTAGACGACAT  | 0  | 29 | RDR2-sensitive |
| ACCCAAGACGGATCTAGACGACGT  | 2  | 83 | RDR2-sensitive |
| ACCCAAGTGGCTCTGACGTGGCAT  | 0  | 18 | RDR2-sensitive |
| ACCCAATCTTGGTCGTTCTGGGC   | 0  | 58 | RDR2-sensitive |
| ACCCAATGGTCCGATTAGAAGGGC  | 0  | 9  | RDR2-sensitive |
| ACCCACACCCATACAGGTCGTCGG  | 1  | 12 | RDR2-sensitive |
| ACCCACACGACGGACACCAAGCGG  | 0  | 11 | RDR2-sensitive |
| ACCCACAGCTGTAGCGGAGGCCAA  | 0  | 11 | RDR2-sensitive |
| ACCCACAGGTATAATCACGGACGG  | 0  | 11 | RDR2-sensitive |
| ACCCACAGGTATAGTCGCGGACGG  | 0  | 17 | RDR2-sensitive |
| ACCCACAGGTATGGTCACGGACGA  | 0  | 9  | RDR2-sensitive |
| ACCCACCCGTTGTATTGGTCGGAC  | 0  | 23 | RDR2-sensitive |
| ACCCACGGATCTGAGGAAGAAGAC  | 0  | 9  | RDR2-sensitive |
| ACCCACGTGTAGAATATTTAGGCC  | 0  | 9  | RDR2-sensitive |
| ACCCACTCTGGACCCTTCAGACGA  | 0  | 30 | RDR2-sensitive |
| ACCCACTGTGGTTATCATGTCAAT  | 17 | 0  | RDR2-resistant |
| ACCCAGAGACTGCAGAAAGTGTGGC | 44 | 5  | RDR2-resistant |
| ACCCAGAGGTTTAGATCGTTGGAT  | 0  | 13 | RDR2-sensitive |
| ACCCAGATACGGCTGCACGGTACT  | 0  | 10 | RDR2-sensitive |
| ACCCAGCATGCTGATCGGACGGGA  | 0  | 14 | RDR2-sensitive |
| ACCCAGCCTGATCGACGAGGACGG  | 0  | 61 | RDR2-sensitive |
| ACCCAGCTGGTGTGATGTCGTGGC  | 6  | 21 | RDR2-sensitive |
| ACCCAGTTGGGCTGTAAGTGGCGT  | 0  | 13 | RDR2-sensitive |
| ACCCATAAGGATGGTCTGCTGTAAG | 0  | 9  | RDR2-sensitive |
| ACCCATCGGGTATCGGATCGCGGG  | 0  | 19 | RDR2-sensitive |
| ACCCATCGGGTATCGGGCGGATAT  | 0  | 12 | RDR2-sensitive |
| ACCCATCGGGTATCGGGTCGCGGG  | 0  | 13 | RDR2-sensitive |
| ACCCATCTGGACTGGGGCACGCAG  | 1  | 12 | RDR2-sensitive |
| ACCCATCTGGACTGGGGCACGCGG  | 0  | 30 | RDR2-sensitive |
| ACCCATCTGGGCTGGAGCACGCGG  | 1  | 17 | RDR2-sensitive |
| ACCCATCTGGGCTGGGACACGCAG  | 0  | 15 | RDR2-sensitive |
| ACCCATCTGGGCTGGGACACGCAT  | 0  | 9  | RDR2-sensitive |
| ACCCATCTGGGCTGGGACACGCGG  | 1  | 90 | RDR2-sensitive |
| ACCCATCTGGGCTGGGACGCGCAA  | 0  | 10 | RDR2-sensitive |

|                          |     |     |                |
|--------------------------|-----|-----|----------------|
| ACCCATCTGGGCTGGGACGCGCAG | 0   | 40  | RDR2-sensitive |
| ACCCATCTGGGCTGGGGCACGCAG | 9   | 184 | RDR2-sensitive |
| ACCCATCTGGGCTGGGGCACGCGG | 5   | 145 | RDR2-sensitive |
| ACCCATGAACCCGTCGGGTATACA | 0   | 11  | RDR2-sensitive |
| ACCCATGTAATCGGGCTGAGGCAC | 1   | 40  | RDR2-sensitive |
| ACCCATTCCGAAAACGGGTGTCGG | 0   | 29  | RDR2-sensitive |
| ACCCCAACGGTCGGCTGACATGGC | 0   | 12  | RDR2-sensitive |
| ACCCCAACGGTCGGCTGACGTGGC | 1   | 32  | RDR2-sensitive |
| ACCCCAACGGTCTGCTGACGTGGC | 0   | 15  | RDR2-sensitive |
| ACCCCAACTGTCGGCTGACGTGGC | 0   | 9   | RDR2-sensitive |
| ACCCCAGTTGTGGACTGTCCGGC  | 2   | 113 | RDR2-sensitive |
| ACCCCATATGTAGAGTGCATGCAA | 1   | 29  | RDR2-sensitive |
| ACCCCCATGGGAAAGTGTCCGACC | 0   | 10  | RDR2-sensitive |
| ACCCCCGACAGAAGGCAACTAGG  | 0   | 12  | RDR2-sensitive |
| ACCCCCGGATGAGAAATGAAGGCA | 0   | 10  | RDR2-sensitive |
| ACCCCCTGACGCAGCACCGTTGGA | 0   | 9   | RDR2-sensitive |
| ACCCCCTGTAGACCCGGCTGGCGC | 0   | 65  | RDR2-sensitive |
| ACCCCGGACAGGAGACGCAGTCAT | 0   | 11  | RDR2-sensitive |
| ACCCCGGATCGTAGGCGCAGAGGC | 0   | 14  | RDR2-sensitive |
| ACCCCGTTAGCTGAATGAGGACGA | 0   | 9   | RDR2-sensitive |
| ACCCCTAGGCGTGGACTGTCCGGA | 0   | 11  | RDR2-sensitive |
| ACCCCTCAGGGCAAAGTCCGGTAT | 0   | 13  | RDR2-sensitive |
| ACCCCTCGGGCGTGGTAGCGTCGC | 2   | 109 | RDR2-sensitive |
| ACCCCTGATCAGTAGTGGGCGCGG | 0   | 9   | RDR2-sensitive |
| ACCCCTGGATCTAGCGGACGGCTG | 0   | 10  | RDR2-sensitive |
| ACCCCTGTAGATGGTATGGCTTGA | 0   | 24  | RDR2-sensitive |
| ACCCCTTGGTGAAGATGTCGGCGA | 0   | 15  | RDR2-sensitive |
| ACCCCTTGTGGTTCTTTGGCATT  | 340 | 0   | RDR2-resistant |
| ACCCGACAGGCTGGTTGGACGCGC | 0   | 10  | RDR2-sensitive |
| ACCCGACGCACGGAACGATGACGG | 0   | 20  | RDR2-sensitive |
| ACCCGAGGACGAAGACGCCGGTGC | 0   | 13  | RDR2-sensitive |
| ACCCGAGGCTTTAGAATAGGGCTG | 0   | 18  | RDR2-sensitive |
| ACCCGAGTCGTGAAGAAGATGCTG | 0   | 18  | RDR2-sensitive |
| ACCCGATAGACTGGTTAGGCGCGC | 0   | 9   | RDR2-sensitive |
| ACCCGATGCACAGAACGACGACGG | 0   | 13  | RDR2-sensitive |
| ACCCGCACACATCCAGATCGTCGT | 0   | 37  | RDR2-sensitive |
| ACCCGCAGAGGACCTGGGCGCAGC | 0   | 16  | RDR2-sensitive |
| ACCCGCATAATATGCAGAGGCTGG | 0   | 9   | RDR2-sensitive |
| ACCCGCATAGAACCGGACTCGGAC | 0   | 10  | RDR2-sensitive |
| ACCCGCCTCGGACGGAACGGCCT  | 0   | 10  | RDR2-sensitive |
| ACCCGCGGGTCTGTTATTGGGCAA | 8   | 24  | RDR2-sensitive |
| ACCCGCGGGTTTAGACAGTTCGGC | 0   | 18  | RDR2-sensitive |
| ACCCGCGTAGAACCAGACCGTGCT | 0   | 13  | RDR2-sensitive |
| ACCCGCGTTGATGCAGAGGATCGT | 0   | 9   | RDR2-sensitive |
| ACCCGGAACGATGCAAAGCAGCAC | 0   | 11  | RDR2-sensitive |
| ACCCGGACATGTGGTTGGTGGCCT | 26  | 3   | RDR2-resistant |
| ACCCGGACCGCTGAGAACACGGGA | 0   | 17  | RDR2-sensitive |
| ACCCGGACGCCGTGGCGTTGACGT | 0   | 18  | RDR2-sensitive |
| ACCCGGACGGTCTACACTAATGCC | 0   | 17  | RDR2-sensitive |

|                           |     |     |                |
|---------------------------|-----|-----|----------------|
| ACCCGGACTGTTTCGGCCCATAGGC | 1   | 14  | RDR2-sensitive |
| ACCCGGACTTTGAGAAGAGGGATG  | 1   | 28  | RDR2-sensitive |
| ACCCGGAGACTGCAGAAGTATGGC  | 0   | 9   | RDR2-sensitive |
| ACCCGGAGAGGATTGGAGGGGCTA  | 3   | 19  | RDR2-sensitive |
| ACCCGGAGGCAGAACCCAGGGGAGG | 0   | 24  | RDR2-sensitive |
| ACCCGGATAGAATCGTATCGGATA  | 0   | 10  | RDR2-sensitive |
| ACCCGGATATACAGCAGTCGGATA  | 0   | 13  | RDR2-sensitive |
| ACCCGGCACGGTAGAATAAACGGG  | 0   | 21  | RDR2-sensitive |
| ACCCGGCACGGTAGAATAAGCGGA  | 0   | 64  | RDR2-sensitive |
| ACCCGGCACGGTAGAATAAGCGGG  | 7   | 574 | RDR2-sensitive |
| ACCCGGCATGGTAGAATAAGCGGG  | 0   | 15  | RDR2-sensitive |
| ACCCGGCTTGTAGTTGTGCTTAAG  | 3   | 18  | RDR2-sensitive |
| ACCCGGGAGCAGGATGAACGAGCG  | 33  | 4   | RDR2-resistant |
| ACCCGGGCTGTGAGAGAAGAGGAA  | 0   | 63  | RDR2-sensitive |
| ACCCGGGCTGTGAGAGGAGGGGAA  | 4   | 142 | RDR2-sensitive |
| ACCCGGGTGTAGAGATGGATTCGG  | 0   | 9   | RDR2-sensitive |
| ACCCGTAGACCTGAACTCGACGGG  | 1   | 13  | RDR2-sensitive |
| ACCCGTAGATCTCGAGCAAGGCAG  | 0   | 31  | RDR2-sensitive |
| ACCCGTAGGTCTGTTATTGGGCAA  | 1   | 20  | RDR2-sensitive |
| ACCCGTCGCGGATAGTGGGTACGG  | 0   | 13  | RDR2-sensitive |
| ACCCGTCGGGTATTCGGATTCGG   | 0   | 23  | RDR2-sensitive |
| ACCCGTCGTAGAGTTACTCGGCAT  | 0   | 10  | RDR2-sensitive |
| ACCCGTCGTCTTGCTGGACGCGCT  | 0   | 16  | RDR2-sensitive |
| ACCCGCTTTCTGTAGGGTGGCCA   | 1   | 22  | RDR2-sensitive |
| ACCCGTGCTGCAAGCTTTATGGTT  | 420 | 1   | RDR2-resistant |
| ACCCGTGGATCTGTTATTGGGCAA  | 0   | 10  | RDR2-sensitive |
| ACCCGTGGGTATAGTCATGGACGG  | 1   | 49  | RDR2-sensitive |
| ACCCGTGGGTCTGTAATTGGGCAA  | 0   | 32  | RDR2-sensitive |
| ACCCGTGGGTCTGTTATTAGGCAA  | 1   | 19  | RDR2-sensitive |
| ACCCGTGGGTCTGTTATTGGCAAA  | 1   | 20  | RDR2-sensitive |
| ACCCGTGGGTCTGTTATTGGGCAA  | 87  | 714 | RDR2-sensitive |
| ACCCGTGGGTCTGTTATTGGGCAC  | 2   | 17  | RDR2-sensitive |
| ACCCGTGGGTCTGTTATTGGGCAT  | 5   | 23  | RDR2-sensitive |
| ACCCGTGGGTCTGTTATTTGGCAA  | 0   | 17  | RDR2-sensitive |
| ACCCGTGGGTCTGTTGTTGGGCAA  | 0   | 27  | RDR2-sensitive |
| ACCCGTTGCACGTCTGTAGATGGC  | 0   | 11  | RDR2-sensitive |
| ACCCGTTGGTCTGTTATTGGGCAA  | 1   | 21  | RDR2-sensitive |
| ACCCGTTTTAGAGTTTGTGCGGTCG | 0   | 15  | RDR2-sensitive |
| ACCCGTTTTGATGCGGGGTCGGAT  | 0   | 19  | RDR2-sensitive |
| ACCCTAACCTAATGGGCCGGCAG   | 0   | 10  | RDR2-sensitive |
| ACCCTAACCTGGACTGAGAAGGCG  | 0   | 9   | RDR2-sensitive |
| ACCCTAACTGACTCTGCGCACGCG  | 0   | 9   | RDR2-sensitive |
| ACCCTAAGAACCGTCGGAAACAGT  | 0   | 13  | RDR2-sensitive |
| ACCCTAAGCCACAGATCGTTCGTG  | 0   | 9   | RDR2-sensitive |
| ACCCTAATGAGTCGGGCGTCCGGA  | 0   | 10  | RDR2-sensitive |
| ACCCTAATTCGTGGTGGTCTCGGA  | 0   | 42  | RDR2-sensitive |
| ACCCTAATTCGTGGTGGTCTCGGG  | 0   | 18  | RDR2-sensitive |
| ACCCTACTGTAGTCAGCGGAGCAT  | 0   | 10  | RDR2-sensitive |
| ACCCTAGAACCAAGCCTGCGGCAG  | 0   | 36  | RDR2-sensitive |

|                           |     |    |                |
|---------------------------|-----|----|----------------|
| ACCCTAGAACTTACTCCAGGAGAG  | 0   | 9  | RDR2-sensitive |
| ACCCTAGAGTCGTCGGCTGCGGCT  | 0   | 10 | RDR2-sensitive |
| ACCCTAGTGTTGTCGGCTGCGGTT  | 0   | 9  | RDR2-sensitive |
| ACCCTATGGGCTGGCCACCGGAC   | 1   | 16 | RDR2-sensitive |
| ACCCTATGGGCTGGTCTACCGGAC  | 0   | 23 | RDR2-sensitive |
| ACCCTATTTGAGGGATCGTCCCGT  | 0   | 10 | RDR2-sensitive |
| ACCCTCAAGACGCCTAATTCTCAG  | 0   | 25 | RDR2-sensitive |
| ACCCTCAGGGTCGGACGAGGCCGA  | 0   | 46 | RDR2-sensitive |
| ACCCTCAGTAAAGGTTGTCGGTAT  | 0   | 10 | RDR2-sensitive |
| ACCCTCCCATACGCTCTGATGATC  | 0   | 10 | RDR2-sensitive |
| ACCCTCGGATTCCGCAGACGATGC  | 0   | 37 | RDR2-sensitive |
| ACCCTCGGATTCGGCAGACGATGC  | 0   | 27 | RDR2-sensitive |
| ACCCTCTACAGATAGCGGACGCAT  | 0   | 20 | RDR2-sensitive |
| ACCCTCTGCGACGGTGTGGACGGT  | 0   | 12 | RDR2-sensitive |
| ACCCTCTGGAGCCCAGAACGTGTA  | 0   | 15 | RDR2-sensitive |
| ACCCTCTGTAGCAGCGCGGACGAT  | 0   | 15 | RDR2-sensitive |
| ACCCTGAAAGAACTTGCTCGGTAT  | 0   | 10 | RDR2-sensitive |
| ACCCTGAGAGTCACGTAGAGACGA  | 0   | 9  | RDR2-sensitive |
| ACCCTGCTGGAGTTCGGACCTACC  | 0   | 11 | RDR2-sensitive |
| ACCCTGGAAGTGCAGGAGCCGAAT  | 14  | 0  | RDR2-resistant |
| ACCCTGGACCAGGCTCTGCAGGCA  | 1   | 35 | RDR2-sensitive |
| ACCCTGGAGGATGAGGTCGAGGAC  | 427 | 1  | RDR2-resistant |
| ACCCTGGCCAGGCTCTGCAGGCGT  | 0   | 37 | RDR2-sensitive |
| ACCCTGGGCCAGGCTCTGCAGGCG  | 0   | 12 | RDR2-sensitive |
| ACCCTGGGCCAGGCTCTGTAGGCA  | 0   | 9  | RDR2-sensitive |
| ACCCTGGTTGACCTGATACGGTAT  | 0   | 12 | RDR2-sensitive |
| ACCCTGTAGAGTGAGGATTTGGGT  | 0   | 10 | RDR2-sensitive |
| ACCCTGTAGGGCTGATTTGGTGAC  | 0   | 9  | RDR2-sensitive |
| ACCCTGTGGATACCCGATCGGCAT  | 0   | 25 | RDR2-sensitive |
| ACCCTGTTGGGACCTGACAAGCAG  | 0   | 12 | RDR2-sensitive |
| ACCCTTAACCGTGTTCGGGCCGGGC | 0   | 13 | RDR2-sensitive |
| ACCCTTACACTGGATTGTTCCGAT  | 2   | 46 | RDR2-sensitive |
| ACCCTTCGCAGGACTCGGCGCTTT  | 0   | 9  | RDR2-sensitive |
| ACCCTTCGGACTCGGAGCGAGCAT  | 0   | 20 | RDR2-sensitive |
| ACCCTTGACTATTGGACTAGGCCGA | 30  | 0  | RDR2-resistant |
| ACCCTTTACAGTAGTGCGTCTGAC  | 0   | 32 | RDR2-sensitive |
| ACCGAAAATGGACGGTAGCCGGAC  | 0   | 10 | RDR2-sensitive |
| ACCGAAACCGTAGAGAGGGCCACC  | 26  | 0  | RDR2-resistant |
| ACCGAACAAGCCCTGACGGAAGCTC | 0   | 9  | RDR2-sensitive |
| ACCGAACACTGGACGTAGAGACGT  | 0   | 29 | RDR2-sensitive |
| ACCGAACAGCGGACAGGAGGGCTA  | 0   | 15 | RDR2-sensitive |
| ACCGAACAGGGCCTTAGACGGAAC  | 0   | 14 | RDR2-sensitive |
| ACCGAACCGAACCGAACCGAAGAA  | 0   | 9  | RDR2-sensitive |
| ACCGAACCGAACCGAAGAACCGAA  | 0   | 17 | RDR2-sensitive |
| ACCGAACCGGAAGCACTGAGACGA  | 0   | 22 | RDR2-sensitive |
| ACCGAACTATAGAGGAAGGGCAAA  | 0   | 13 | RDR2-sensitive |
| ACCGAACTCGCTGTGGAACACGGG  | 0   | 9  | RDR2-sensitive |
| ACCGAACTGGCGAAGCACGGCTGC  | 3   | 67 | RDR2-sensitive |
| ACCGAACTGTACAGATGCGGAGCT  | 0   | 16 | RDR2-sensitive |

|                           |    |     |                |
|---------------------------|----|-----|----------------|
| ACCGAACTGTTGTGTTGGCTTCAT  | 0  | 10  | RDR2-sensitive |
| ACCGAAGACTAGATGTAGGGACGT  | 0  | 19  | RDR2-sensitive |
| ACCGAAGACTGAAAGTAGGGACGT  | 0  | 11  | RDR2-sensitive |
| ACCGAAGACTGGAAGTAGGGACGT  | 0  | 81  | RDR2-sensitive |
| ACCGAAGACTGGATGTAGAGACGT  | 0  | 50  | RDR2-sensitive |
| ACCGAAGGATAGAGCAGACGAGAC  | 0  | 53  | RDR2-sensitive |
| ACCGAAGGCAGAACCAGGGGACAC  | 0  | 20  | RDR2-sensitive |
| ACCGAAGGCAGAACCAGGGGAGGC  | 0  | 28  | RDR2-sensitive |
| ACCGAAGGGGATTGTAGGGGCTAA  | 0  | 9   | RDR2-sensitive |
| ACCGAATACTGGATGTAGGGACGT  | 0  | 55  | RDR2-sensitive |
| ACCGAATGCAGAACCATGGTGCAC  | 0  | 11  | RDR2-sensitive |
| ACCGAATTCGTAGAGACCGCGCAT  | 0  | 14  | RDR2-sensitive |
| ACCGAATTCGTAGGGATCGCTCGA  | 0  | 10  | RDR2-sensitive |
| ACCGACAAGGGCCGTCTGACGCAC  | 0  | 12  | RDR2-sensitive |
| ACCGACACAGCTTGCAACGACGTT  | 0  | 17  | RDR2-sensitive |
| ACCGACACGTAGAGGGCGCTGTAG  | 0  | 74  | RDR2-sensitive |
| ACCGACACGTAGGAGGCGCTGTAG  | 0  | 65  | RDR2-sensitive |
| ACCGACACGTAGGGGACGCTGTAA  | 0  | 23  | RDR2-sensitive |
| ACCGACACGTAGGGGACGCTGTAG  | 0  | 56  | RDR2-sensitive |
| ACCGACACGTAGGGGGCGCTGTAG  | 1  | 48  | RDR2-sensitive |
| ACCGACACTGTGGTGATAACTGGT  | 0  | 18  | RDR2-sensitive |
| ACCGACAGGCTGGACATTAGAAGA  | 0  | 49  | RDR2-sensitive |
| ACCGACAGTTGACTTTATAGGCTA  | 0  | 36  | RDR2-sensitive |
| ACCGACATGTAGGGGGCGCTGTAG  | 0  | 9   | RDR2-sensitive |
| ACCGACCAGGTGCTCTGACCGCG   | 0  | 55  | RDR2-sensitive |
| ACCGACCCTGGCAGAACAGTGCAC  | 0  | 10  | RDR2-sensitive |
| ACCGACGAGCTAGATCTGCGACGG  | 0  | 12  | RDR2-sensitive |
| ACCGACGAGGACCCAGAGTTCGGA  | 0  | 9   | RDR2-sensitive |
| ACCGACGGATGCTGTGATGGTATT  | 0  | 9   | RDR2-sensitive |
| ACCGACGTGAGCAGGAAGCGTGA   | 0  | 9   | RDR2-sensitive |
| ACCGACGTGGAACCGAGCTCGGCG  | 0  | 12  | RDR2-sensitive |
| ACCGACTGACCAAATTGCAGGGGC  | 0  | 15  | RDR2-sensitive |
| ACCGACTGCGTACAACATACATCGA | 0  | 50  | RDR2-sensitive |
| ACCGACTGGACCAGGCTCACGGTT  | 2  | 32  | RDR2-sensitive |
| ACCGACTGTAAAATTTTATCGGTG  | 0  | 13  | RDR2-sensitive |
| ACCGACTGTAGCTCGATGGTTCGT  | 5  | 67  | RDR2-sensitive |
| ACCGACTGTCCGAAGTACTCGGCA  | 0  | 15  | RDR2-sensitive |
| ACCGACTGTGCTATTTCTAGTGGC  | 2  | 38  | RDR2-sensitive |
| ACCGACTGTGGGGGCAGATATCAC  | 0  | 15  | RDR2-sensitive |
| ACCGACTGTGTTATTTCTAGTGGC  | 21 | 106 | RDR2-sensitive |
| ACCGACTGTGTTGGAGCCGGCTCT  | 0  | 16  | RDR2-sensitive |
| ACCGACTGTTGATCCAAGGGCGCC  | 0  | 9   | RDR2-sensitive |
| ACCGACTGTTTGGTTACGCGGCCG  | 0  | 24  | RDR2-sensitive |
| ACCGACTTCGTACGGCTACATCGA  | 1  | 46  | RDR2-sensitive |
| ACCGACTTGAGTCCGAAGATGCCT  | 0  | 12  | RDR2-sensitive |
| ACCGAGACCAGGGTCGGACGTCTGA | 0  | 13  | RDR2-sensitive |
| ACCGAGACTACATGTAGGGACGTT  | 0  | 9   | RDR2-sensitive |
| ACCGAGACTGCATGCGTGGACGTG  | 2  | 14  | RDR2-sensitive |
| ACCGAGAGTAGGACACTCGGCATA  | 0  | 12  | RDR2-sensitive |

|                          |    |     |                |
|--------------------------|----|-----|----------------|
| ACCGAGAGTAGGACGGCGCTCGAC | 0  | 14  | RDR2-sensitive |
| ACCGAGATCGCGGTCCACGGACGG | 0  | 20  | RDR2-sensitive |
| ACCGAGATTTGTGGTGGACTGCAT | 0  | 91  | RDR2-sensitive |
| ACCGAGCAAGTTCCGTAGACGTAG | 0  | 16  | RDR2-sensitive |
| ACCGAGCGCAGGACGTTGCCGAGT | 0  | 20  | RDR2-sensitive |
| ACCGAGCTAGGATGTCAGCTCAGC | 0  | 12  | RDR2-sensitive |
| ACCGAGCTCGGCGCCATAGATCAT | 2  | 18  | RDR2-sensitive |
| ACCGAGCTCGGCGCCATAGATCTT | 0  | 23  | RDR2-sensitive |
| ACCGAGCTCGGCGTCATAGATCTT | 0  | 14  | RDR2-sensitive |
| ACCGAGCTTGGACTGCGGCGTAGG | 1  | 49  | RDR2-sensitive |
| ACCGAGGTCGCGGCCCATGGACGG | 1  | 12  | RDR2-sensitive |
| ACCGAGTGGACGAAGAGTGATGGC | 0  | 11  | RDR2-sensitive |
| ACCGAGTGTAGCACGTGGCAAAGA | 0  | 10  | RDR2-sensitive |
| ACCGATAGACTACAGAAATAGGCC | 15 | 0   | RDR2-resistant |
| ACCGATAGACTATAGAAATAGGCC | 24 | 0   | RDR2-resistant |
| ACCGATAGTAGAACACTCGGCATA | 0  | 11  | RDR2-sensitive |
| ACCGATATCAGGACACTCGGCATA | 1  | 108 | RDR2-sensitive |
| ACCGATCCGATCTGACGATAGGCA | 0  | 22  | RDR2-sensitive |
| ACCGATCCGGATCTGCTTGGAGGC | 0  | 20  | RDR2-sensitive |
| ACCGATCGTTTGAGTATGGGCATC | 0  | 10  | RDR2-sensitive |
| ACCGATCTCTCGGGACTGGCGTCA | 0  | 9   | RDR2-sensitive |
| ACCGATCTGTAGTGGAACAGGCTC | 0  | 28  | RDR2-sensitive |
| ACCGATGACTAGACACACGTGCTG | 0  | 54  | RDR2-sensitive |
| ACCGATGACTGAAAGTAGGGACGT | 0  | 15  | RDR2-sensitive |
| ACCGATGACTGGAAGTAGGGACGT | 1  | 89  | RDR2-sensitive |
| ACCGATGACTGGATGCAGGGACGT | 0  | 16  | RDR2-sensitive |
| ACCGATGACTGGATGTAGGGACGT | 0  | 11  | RDR2-sensitive |
| ACCGATGACTGGGCACACGTGCTG | 0  | 16  | RDR2-sensitive |
| ACCGATGACTGTAAGTAGGGATGT | 0  | 22  | RDR2-sensitive |
| ACCGATGAGGACCTAGAAGCCGGA | 2  | 17  | RDR2-sensitive |
| ACCGATGATTGGAAGTAGGGACGT | 0  | 9   | RDR2-sensitive |
| ACCGATGCTGCGATCCTGAAGACG | 0  | 13  | RDR2-sensitive |
| ACCGATGGCTTGACTCGGCTCGTT | 0  | 14  | RDR2-sensitive |
| ACCGATTGCTGGACTGGATGGTGC | 0  | 27  | RDR2-sensitive |
| ACCGCAAGCAGCAGACTCGAACAA | 0  | 9   | RDR2-sensitive |
| ACCGCACTGGTGTAGCTCGGCGTC | 1  | 30  | RDR2-sensitive |
| ACCGCAGACTGAAAGTAGGGACGT | 0  | 9   | RDR2-sensitive |
| ACCGCAGAGCGGATGAGGATGATT | 33 | 2   | RDR2-resistant |
| ACCGCAGGTAGATTTGGACGGCGC | 0  | 20  | RDR2-sensitive |
| ACCGCATCCGACGACGACGCCATC | 1  | 14  | RDR2-sensitive |
| ACCGCATGCGTCGCTGTGTTCGGC | 0  | 15  | RDR2-sensitive |
| ACCGCCAGATGCGTTGATCGTGGA | 0  | 11  | RDR2-sensitive |
| ACCGCCACTCTGCAACGGCCAG   | 0  | 24  | RDR2-sensitive |
| ACCGCCTCGTAGCAACGCACGGAC | 0  | 15  | RDR2-sensitive |
| ACCGCCTGGGCTGTTGGATGGTAA | 0  | 17  | RDR2-sensitive |
| ACCGCGAACGTGGACCGTCCAGAC | 0  | 12  | RDR2-sensitive |
| ACCGCGATTGTAACGGCCTGCCAA | 0  | 9   | RDR2-sensitive |
| ACCGCGCACTGTAGACGACGGCCC | 2  | 44  | RDR2-sensitive |
| ACCGCGCACTGTAGACGACGGCTC | 1  | 29  | RDR2-sensitive |

|                          |    |     |                |
|--------------------------|----|-----|----------------|
| ACCGCGCCTGTAGACCGGACGGTC | 0  | 11  | RDR2-sensitive |
| ACCGCGCTCTGAACCAGACGACCC | 0  | 9   | RDR2-sensitive |
| ACCGCGCTCTGTCATGCTCGACGG | 0  | 14  | RDR2-sensitive |
| ACCGCGGAACAGGATTCGGCCCAC | 1  | 14  | RDR2-sensitive |
| ACCGCGGACCGTCCGGCCTCAGGG | 0  | 23  | RDR2-sensitive |
| ACCGCGGATTGTCTGCGCCGGCAC | 0  | 16  | RDR2-sensitive |
| ACCGCGGGACTGCGGCATCTTCAC | 0  | 10  | RDR2-sensitive |
| ACCGCGTACACGTATCGTTCCGAA | 0  | 11  | RDR2-sensitive |
| ACCGCTCGACTGCGTAGAAGAGGA | 0  | 11  | RDR2-sensitive |
| ACCGCTCGCTTTTGACTGGGACGG | 0  | 16  | RDR2-sensitive |
| ACCGCTCTGCAGCACGTATGACGT | 0  | 37  | RDR2-sensitive |
| ACCGCTCTGGCCTCTGGACGCGGC | 0  | 52  | RDR2-sensitive |
| ACCGCTGAAGACGGTCGGACTCTC | 0  | 13  | RDR2-sensitive |
| ACCGCTGTAGAGCGAGTCGGCGGC | 1  | 15  | RDR2-sensitive |
| ACCGCTTTCTGTGACGGACGCAC  | 0  | 9   | RDR2-sensitive |
| ACCGGAAACTCCTGACGTAGACGA | 17 | 1   | RDR2-resistant |
| ACCGGAACGAACCATCTGACGGTG | 0  | 32  | RDR2-sensitive |
| ACCGGAACTGTTTCGGCCAGGATT | 1  | 31  | RDR2-sensitive |
| ACCGGAATCGCGTTCTTTGCCGAG | 0  | 10  | RDR2-sensitive |
| ACCGGAATGGTGGCAGAACAAGGA | 0  | 17  | RDR2-sensitive |
| ACCGGACAAGCAGCGCATTTCCGA | 0  | 11  | RDR2-sensitive |
| ACCGGACACAACCCTGCAAGGACG | 0  | 12  | RDR2-sensitive |
| ACCGGACACTGCACAGTAGATGTC | 1  | 17  | RDR2-sensitive |
| ACCGGACACTGCATAGTGCAACGA | 0  | 13  | RDR2-sensitive |
| ACCGGACAGAACGGTTTACAGACC | 0  | 9   | RDR2-sensitive |
| ACCGGACAGGACGCTTTAGCGGTC | 0  | 23  | RDR2-sensitive |
| ACCGGACAGGATTAGAGGGGCTAA | 0  | 15  | RDR2-sensitive |
| ACCGGACAGTCTGTAGACGGTC   | 2  | 14  | RDR2-sensitive |
| ACCGGACAGTCACTGTAGACGGTC | 6  | 42  | RDR2-sensitive |
| ACCGGACAGTCCAGCGTGTGGCAC | 0  | 9   | RDR2-sensitive |
| ACCGGACAGTCCGGTGCACACCGG | 30 | 153 | RDR2-sensitive |
| ACCGGACAGTCCGGTGTACACCGG | 7  | 23  | RDR2-sensitive |
| ACCGGACAGTCTGCGCAGAGAGGC | 0  | 20  | RDR2-sensitive |
| ACCGGACAGTCTGGCAACGGTCGA | 0  | 9   | RDR2-sensitive |
| ACCGGACAGTCTGGTGGTAGGCAC | 0  | 17  | RDR2-sensitive |
| ACCGGACAGTGAACAGTAACGGAT | 1  | 194 | RDR2-sensitive |
| ACCGGACAGTGAACAGTGCGCGGG | 0  | 23  | RDR2-sensitive |
| ACCGGACAGTGCAGTAACGACTAG | 0  | 9   | RDR2-sensitive |
| ACCGGACATCCAGGCGGGCCCAGA | 0  | 12  | RDR2-sensitive |
| ACCGGACCAGCTCGAGGTAGACGA | 0  | 11  | RDR2-sensitive |
| ACCGGACCATCAGGCGATATGCAG | 0  | 11  | RDR2-sensitive |
| ACCGGACCCAGGTGGTTGGCTGGA | 0  | 17  | RDR2-sensitive |
| ACCGGACCCTATAGCGGACGTCGT | 0  | 11  | RDR2-sensitive |
| ACCGGACCCTTTTTGGCTTATTGT | 4  | 23  | RDR2-sensitive |
| ACCGGACCGAGCACGCAGAGACGA | 2  | 14  | RDR2-sensitive |
| ACCGGACCGAGTACTGTTAGCGGT | 0  | 10  | RDR2-sensitive |
| ACCGGACCGATTATGCAGACGCCT | 1  | 14  | RDR2-sensitive |
| ACCGGACCGCCTGTACAGAGGATC | 0  | 14  | RDR2-sensitive |
| ACCGGACCGCCTGTATAGAGGATA | 1  | 29  | RDR2-sensitive |



|                           |    |    |                |
|---------------------------|----|----|----------------|
| ACCGGACCGGACGCATGCCTGCAC  | 0  | 37 | RDR2-sensitive |
| ACCGGACCGGCTCGACACGGCTAG  | 0  | 25 | RDR2-sensitive |
| ACCGGACCTAGGTGGTTGGCTGGA  | 0  | 27 | RDR2-sensitive |
| ACCGGACCTCTAGCATGGCGTAGA  | 0  | 18 | RDR2-sensitive |
| ACCGGACCTGGCAGACACTAGGCG  | 0  | 15 | RDR2-sensitive |
| ACCGGACGACCCATACTGTTTGA   | 0  | 26 | RDR2-sensitive |
| ACCGGACGCACCGATTTTCGGAAC  | 0  | 12 | RDR2-sensitive |
| ACCGGACTATACAGTACACACCGG  | 0  | 10 | RDR2-sensitive |
| ACCGGACTATCCGATGGGACGCAT  | 0  | 31 | RDR2-sensitive |
| ACCGGACTGGCACGGTTTGAAGGT  | 0  | 14 | RDR2-sensitive |
| ACCGGACTGTCCGGTGCACCATAC  | 1  | 15 | RDR2-sensitive |
| ACCGGACTGTCCGGTGCGCCCATC  | 2  | 24 | RDR2-sensitive |
| ACCGGACTGTCTGGTGTGCCCATC  | 0  | 9  | RDR2-sensitive |
| ACCGGACTGTTAGGTGTACCACCC  | 0  | 25 | RDR2-sensitive |
| ACCGGACTGTTCCGGTGCGCCCATC | 0  | 17 | RDR2-sensitive |
| ACCGGACTGTTCCGGTGTGCCACGT | 0  | 12 | RDR2-sensitive |
| ACCGGAGAGGATTGTAGAAGGGGA  | 0  | 11 | RDR2-sensitive |
| ACCGGAGGACCTGTAGAGACGGAG  | 0  | 13 | RDR2-sensitive |
| ACCGGAGGATGACGTACATGACGT  | 0  | 18 | RDR2-sensitive |
| ACCGGAGGATGACGTGCAGGACAT  | 0  | 18 | RDR2-sensitive |
| ACCGGAGGCAGAACACAAAAGGC   | 0  | 20 | RDR2-sensitive |
| ACCGGAGGGGATTGGAGGGGCTAA  | 1  | 13 | RDR2-sensitive |
| ACCGGAGTAGACTAGAGAGGCTAA  | 0  | 43 | RDR2-sensitive |
| ACCGGAGTCGGCATAACCACTCGGA | 0  | 9  | RDR2-sensitive |
| ACCGGAGTCTGGATGCGAAGGCCT  | 24 | 1  | RDR2-resistant |
| ACCGGAGTGAATTGGAGGGGCTAA  | 0  | 10 | RDR2-sensitive |
| ACCGGATATCGACGTAGCATGCCA  | 0  | 10 | RDR2-sensitive |
| ACCGGATCGAAGATCGGCATTCCC  | 0  | 12 | RDR2-sensitive |
| ACCGGATCTGCGACAGAGCGGCAC  | 1  | 13 | RDR2-sensitive |
| ACCGGATGAAGAAGCAGTCACGAC  | 1  | 21 | RDR2-sensitive |
| ACCGGATGACTGAGCGGAGCGGCG  | 0  | 12 | RDR2-sensitive |
| ACCGGATGTAGGGACGTGCAGCCC  | 0  | 9  | RDR2-sensitive |
| ACCGGATGTCGACGTGGCGTGCCA  | 0  | 13 | RDR2-sensitive |
| ACCGGATTAGTAGGCTAGATGGTT  | 23 | 3  | RDR2-resistant |
| ACCGGATTGTTCACTGCTACCCAG  | 0  | 22 | RDR2-sensitive |
| ACCGGCAACAGAAGGTGGACAACA  | 0  | 11 | RDR2-sensitive |
| ACCGGCACGACTAGACGAAGGCAC  | 0  | 16 | RDR2-sensitive |
| ACCGGCACGGACCAACGAAGGCAC  | 0  | 33 | RDR2-sensitive |
| ACCGGCAGAAACGAACAAGGCCTC  | 0  | 10 | RDR2-sensitive |
| ACCGGCATACCCTGTAAAACCAAC  | 0  | 11 | RDR2-sensitive |
| ACCGGCATGACGTGCATGAGCCAT  | 0  | 9  | RDR2-sensitive |
| ACCGGCATGTAGATGTGGCCCAGC  | 5  | 20 | RDR2-sensitive |
| ACCGGCCACTGAAAGAGACGGAAC  | 0  | 24 | RDR2-sensitive |
| ACCGGCCACTGAACTCGAAGACGA  | 0  | 9  | RDR2-sensitive |
| ACCGGCCTGACAGAAAGACAGCGC  | 0  | 9  | RDR2-sensitive |
| ACCGGCCTGACAGAAGGACAGCAC  | 0  | 10 | RDR2-sensitive |
| ACCGGCCTGACAGAAGGACAGCGC  | 1  | 45 | RDR2-sensitive |
| ACCGGCCTGACAGAAGGACAGCGT  | 0  | 18 | RDR2-sensitive |
| ACCGGCCTGGGTGGGACGGTTGGC  | 1  | 34 | RDR2-sensitive |

|                              |   |    |                |
|------------------------------|---|----|----------------|
| ACCGGCCTGGTTGCAGGAGATGTT     | 0 | 9  | RDR2-sensitive |
| ACCGGCCTGTTAGTGATGGGGCTA     | 0 | 12 | RDR2-sensitive |
| ACCGGCCTGTTGACCGTGTCGGAC     | 0 | 40 | RDR2-sensitive |
| ACCGGCAGCAGGCTTGAGGCAGGA     | 0 | 14 | RDR2-sensitive |
| ACCGGCTAGTGTAGAGGACACATC     | 0 | 9  | RDR2-sensitive |
| ACCGGCTCGCTAGACACGGCTCAT     | 0 | 9  | RDR2-sensitive |
| ACCGGCTCGGATTAGTTAGCAGGC     | 0 | 9  | RDR2-sensitive |
| ACCGGCTCTGACCGCGTTTTGGCA     | 0 | 12 | RDR2-sensitive |
| ACCGGCTCTGACTCCTGGAGAAGC     | 0 | 12 | RDR2-sensitive |
| ACCGGCTGGAACAGTAGAAGTAGA     | 0 | 12 | RDR2-sensitive |
| ACCGGCTGTGTAGAGGCTAACTAG     | 0 | 15 | RDR2-sensitive |
| ACCGGGACGAGCCAGATGAGACGC     | 0 | 10 | RDR2-sensitive |
| ACCGGGACTGGGACTCAGGAGACG     | 0 | 10 | RDR2-sensitive |
| ACCGGGATTTCTACTGGGGTCGGA     | 0 | 18 | RDR2-sensitive |
| ACCGGGATTTGTAGTGGGCAGTAG     | 0 | 14 | RDR2-sensitive |
| ACCGGGCCATGACTGAGGACGTGA     | 0 | 20 | RDR2-sensitive |
| ACCGGGCCGAATGCATGACGGGCT     | 0 | 71 | RDR2-sensitive |
| ACCGGGCCGGGCTGTTTCGACAGGC    | 0 | 9  | RDR2-sensitive |
| ACCGGGCTAGCACGGCATGAAGGC     | 0 | 11 | RDR2-sensitive |
| ACCGGGCTAGGCCTGACCCGCATA     | 0 | 12 | RDR2-sensitive |
| ACCGGGCTCCAGAACGGTCTCCGC     | 0 | 14 | RDR2-sensitive |
| ACCGGGCTGGACGGTCGAGTGGGA     | 0 | 10 | RDR2-sensitive |
| ACCGGGCTGGGTTGGTACGGGCCT     | 0 | 9  | RDR2-sensitive |
| ACCGGGCTGTCCGATGGGTAGCAC     | 0 | 12 | RDR2-sensitive |
| ACCGGGCTGTGCCGAGGCACTAAT     | 0 | 23 | RDR2-sensitive |
| ACCGGGGCGAGCCAGATGGGACGC     | 0 | 10 | RDR2-sensitive |
| ACCGGGGTGTAGGGTTCCTTACGGC    | 0 | 10 | RDR2-sensitive |
| ACCGGGTTGGACGGTCGAGTGGGA     | 2 | 23 | RDR2-sensitive |
| ACCGGGTTGGACTGTGAGTGGGA      | 0 | 25 | RDR2-sensitive |
| ACCGGTATCGTGATGTTGGGAAGC     | 0 | 9  | RDR2-sensitive |
| ACCGGTCAGAGGCAGAACGGTCAA     | 0 | 49 | RDR2-sensitive |
| ACCGGTCAGAGGTAGAACGGTCAA     | 0 | 10 | RDR2-sensitive |
| ACCGGTCAGTGGAGCAGCGGAGTG     | 0 | 10 | RDR2-sensitive |
| ACCGGTCAGTGGAGCGGCGAAGTG     | 0 | 58 | RDR2-sensitive |
| ACCGGTCCGGACACGTAGCGTCAT     | 0 | 25 | RDR2-sensitive |
| ACCGGTCCGGTATACGTTGCTGAT     | 0 | 11 | RDR2-sensitive |
| ACCGGTGAGGAACAAAAGGACGG      | 0 | 20 | RDR2-sensitive |
| ACCGGTGAGGAAACGTGGATGGTA     | 0 | 10 | RDR2-sensitive |
| ACCGGTGAGTCTGGTGCACGGTTC     | 0 | 13 | RDR2-sensitive |
| ACCGGTGAGTCTCTGCCCGGC        | 0 | 15 | RDR2-sensitive |
| ACCGGTGAGTCTAGACAGACGTCGT    | 0 | 12 | RDR2-sensitive |
| ACCGGTGAGTCTGACAAGAGGACAGCGC | 0 | 11 | RDR2-sensitive |
| ACCGGTGAGTCTGACAGAAGGACAGCGC | 1 | 32 | RDR2-sensitive |
| ACCGGTGAGTCTGGGTGAGACGGTTGGC | 0 | 19 | RDR2-sensitive |
| ACCGGTGAGTCTGCAAATGGAGGCGAT  | 0 | 13 | RDR2-sensitive |
| ACCGGTGAGTCTGAGTGGTCGTCGC    | 0 | 10 | RDR2-sensitive |
| ACCGGTGAGTCTGAGTGGTCGACGACGG | 0 | 13 | RDR2-sensitive |
| ACCGGTGAGTCTGAGTGGTGGC       | 0 | 21 | RDR2-sensitive |
| ACCGGTGAGTCTGAGTGGTGGC       | 0 | 31 | RDR2-sensitive |

|                            |     |    |                |
|----------------------------|-----|----|----------------|
| ACCGTTTTCTGTTTTCTGGCGGC    | 353 | 59 | RDR2-resistant |
| ACCGTACAGATCGGTTACGGACA    | 0   | 18 | RDR2-sensitive |
| ACCGTACGAAGACGCAGTACTCAT   | 0   | 11 | RDR2-sensitive |
| ACCGTACTGGTAGACCGGCCAGG    | 0   | 14 | RDR2-sensitive |
| ACCGTAGAATGCACTGGTCGCAGA   | 0   | 13 | RDR2-sensitive |
| ACCGTAGAATGCCCTAGACGCCA    | 0   | 10 | RDR2-sensitive |
| ACCGTAGACCTCACCTCGCGCGT    | 0   | 20 | RDR2-sensitive |
| ACCGTAGGCTGACCGGTGGCCAA    | 0   | 26 | RDR2-sensitive |
| ACCGTAGGCTGGTCTGAACGGCAA   | 1   | 46 | RDR2-sensitive |
| ACCGTAGTCGGTAAGATCTGTCCG   | 0   | 14 | RDR2-sensitive |
| ACCGTATCGGGGCTCGACGGACC    | 0   | 10 | RDR2-sensitive |
| ACCGTCATCGCTTGGTCGTCGTGC   | 0   | 9  | RDR2-sensitive |
| ACCGTCATTGCTTGGTCGTCGTGC   | 0   | 9  | RDR2-sensitive |
| ACCGTCCACTCTGTAACAACGGTC   | 0   | 22 | RDR2-sensitive |
| ACCGTCCCGGGCTGGAAAGGTTGC   | 1   | 13 | RDR2-sensitive |
| ACCGTCCGACCTGTAGGCGCGGAT   | 0   | 29 | RDR2-sensitive |
| ACCGTCCGCGACTGTGCAGAGACC   | 0   | 11 | RDR2-sensitive |
| ACCGTCCGCGCCTGACCAGAGAGC   | 1   | 23 | RDR2-sensitive |
| ACCGTCCGCGGTCGGCAGAATGGA   | 1   | 18 | RDR2-sensitive |
| ACCGTCCGCGTCTGACCAGAGAGC   | 0   | 11 | RDR2-sensitive |
| ACCGTCCGGACGTACGCAGAGGAG   | 0   | 16 | RDR2-sensitive |
| ACCGTCCGGACGTCAGGCAGGAAA   | 0   | 11 | RDR2-sensitive |
| ACCGTCCGGCTTCGGCGTAGACAA   | 0   | 14 | RDR2-sensitive |
| ACCGTCCGGGCTATACACGCGCAG   | 0   | 12 | RDR2-sensitive |
| ACCGTCTACTCTGCAACGGCCCAG   | 0   | 11 | RDR2-sensitive |
| ACCGTCTCGGACAGGCAGTGGACA   | 0   | 10 | RDR2-sensitive |
| ACCGTCTGTGTAGAGGCTAACCGG   | 1   | 12 | RDR2-sensitive |
| ACCGTGACAGAAAGCTGGAGGCAC   | 0   | 14 | RDR2-sensitive |
| ACCGTGACAGTAGCAAGTGATGGT   | 0   | 9  | RDR2-sensitive |
| ACCGTGACCGAGCGAAAAAGACAA   | 0   | 13 | RDR2-sensitive |
| ACCGTGACTGGGAATACCGGCGT    | 0   | 45 | RDR2-sensitive |
| ACCGTGACTTAGTTTCGTTTCGTCGT | 0   | 9  | RDR2-sensitive |
| ACCGTGACCGTGTGATTGTGGAC    | 0   | 42 | RDR2-sensitive |
| ACCGTGCCAGGTCACATGTCGGAC   | 0   | 14 | RDR2-sensitive |
| ACCGTGCCTGGCTCTCGGACGCGA   | 1   | 25 | RDR2-sensitive |
| ACCGTGCGCCATGCGGTGTTGGAC   | 0   | 9  | RDR2-sensitive |
| ACCGTGCGCTGGGGGAAGAGAGCA   | 26  | 1  | RDR2-resistant |
| ACCGTGCTAGTAGGCTCCGCCGGC   | 0   | 20 | RDR2-sensitive |
| ACCGTGCTATGCAATATCGTCGGT   | 0   | 29 | RDR2-sensitive |
| ACCGTGCTGGGCTCAAACAGGCTG   | 0   | 10 | RDR2-sensitive |
| ACCGTGCTTTAATGATCTGTAGGT   | 0   | 16 | RDR2-sensitive |
| ACCGTGGACTGGCCTCTCCGGCGA   | 1   | 24 | RDR2-sensitive |
| ACCGTGGACTGGTGTCTCGACGGCG  | 0   | 17 | RDR2-sensitive |
| ACCGTGGATTTCGTGATTGGCGATG  | 27  | 1  | RDR2-resistant |
| ACCGTGGTCTCTGAGAGTCGGCAC   | 0   | 21 | RDR2-sensitive |
| ACCGTGTACCGGAGGGAACGAGGC   | 1   | 35 | RDR2-sensitive |
| ACCGTGTACTTGAGGGAACGAGGC   | 0   | 11 | RDR2-sensitive |
| ACCGTGTAGAATAGAGGACGCGAC   | 0   | 78 | RDR2-sensitive |
| ACCGTGCAAGTAGGACTGGGCAT    | 0   | 9  | RDR2-sensitive |

|                           |     |     |                |
|---------------------------|-----|-----|----------------|
| ACCGTGTCGGTACGGTACGGCTAT  | 2   | 24  | RDR2-sensitive |
| ACCGTGCTGATCGTGCCTGGGAC   | 0   | 48  | RDR2-sensitive |
| ACCGTGCTGCCGGGTTAGACTGC   | 0   | 11  | RDR2-sensitive |
| ACCGTGCTTCACGTCGGATAGCG   | 0   | 9   | RDR2-sensitive |
| ACCGTTAAAGGAACTGGGACGGAC  | 0   | 10  | RDR2-sensitive |
| ACCGTTAGGGTTCGACCGTTGGAG  | 11  | 68  | RDR2-sensitive |
| ACCGTTCAAGGGACTGCACGGCGT  | 0   | 26  | RDR2-sensitive |
| ACCGTTCCATGTGTGTCGGACCGT  | 0   | 10  | RDR2-sensitive |
| ACCGTTCGACTGACGAGAAGAGGA  | 0   | 10  | RDR2-sensitive |
| ACCGTTCGAGAGACTGCACGGCGT  | 2   | 25  | RDR2-sensitive |
| ACCGTTCGAGGGACTACATGGCGT  | 0   | 11  | RDR2-sensitive |
| ACCGTTCGAGGGACTGCACAGCGT  | 1   | 29  | RDR2-sensitive |
| ACCGTTCGAGGGACTGCATGGCGT  | 0   | 12  | RDR2-sensitive |
| ACCGTTCGAGTGACTGCATGGCGT  | 2   | 14  | RDR2-sensitive |
| ACCGTTCGGCACCTGACCGCAGAC  | 0   | 22  | RDR2-sensitive |
| ACCGTTCGTTTAGCTTTGAACCGG  | 0   | 12  | RDR2-sensitive |
| ACCGTTGGATACAGAACGGATGGC  | 0   | 19  | RDR2-sensitive |
| ACCGTTGGATGTAGAGGGTGTGAT  | 0   | 13  | RDR2-sensitive |
| ACCGTTGGATGTAGATGGTGTGGT  | 1   | 37  | RDR2-sensitive |
| ACCGTTGGATGTGGAAGGTGTGGT  | 0   | 18  | RDR2-sensitive |
| ACCGTTGGATGTGGAGGATGTGGT  | 0   | 28  | RDR2-sensitive |
| ACCGTTGGATGTGGAGGGTGC GGT | 0   | 19  | RDR2-sensitive |
| ACCGTTGGATGTGGAGGGTGTGAT  | 0   | 10  | RDR2-sensitive |
| ACCGTTGGATGTGGAGGGTGTGGC  | 0   | 20  | RDR2-sensitive |
| ACCGTTGGATGTGGAGGGTGTGGT  | 7   | 130 | RDR2-sensitive |
| ACCGTTGGCCCCGGCCGACCGTTGG | 2   | 16  | RDR2-sensitive |
| ACCGTTGGCGCTCGGCCAAAGACTG | 0   | 10  | RDR2-sensitive |
| ACCGTTGGCTCTCGGCCAAAGACTG | 1   | 14  | RDR2-sensitive |
| ACCGTTGGCTGAGGCACGTGGCTA  | 0   | 10  | RDR2-sensitive |
| ACCGTTGGGGTTCGACCGTTGGAG  | 2   | 24  | RDR2-sensitive |
| ACCGTTGGTCTGAAAGATATCGGT  | 245 | 1   | RDR2-resistant |
| ACCGTTGTAGAGCGAGTCGGCAGC  | 0   | 13  | RDR2-sensitive |
| ACCGTTTAGAGGACGCTGCTGGAG  | 0   | 29  | RDR2-sensitive |
| ACCGTTTAGAGGACGTTGCTGGAG  | 1   | 21  | RDR2-sensitive |
| ACCGTTTCAAGCCGGGGTCGTCAA  | 0   | 87  | RDR2-sensitive |
| ACCTAAAGTCGGGCGGGCACGCAT  | 0   | 9   | RDR2-sensitive |
| ACCTAACCGATGGACGTACGGCCC  | 0   | 17  | RDR2-sensitive |
| ACCTAACTCAGGAGCGGACGTGAC  | 0   | 9   | RDR2-sensitive |
| ACCTAACTGTAGTATGGGCCGCAC  | 1   | 20  | RDR2-sensitive |
| ACCTAAGACGGATCTAGACGACAT  | 0   | 9   | RDR2-sensitive |
| ACCTAATTGTGGGACTGGGCCGGC  | 0   | 35  | RDR2-sensitive |
| ACCTAATTGTGGGCCTGGGCCGGC  | 1   | 19  | RDR2-sensitive |
| ACCTAATTTGAGGGATCGTCCCAC  | 0   | 9   | RDR2-sensitive |
| ACCTAATTTGAGGGATCGTCCCAT  | 1   | 83  | RDR2-sensitive |
| ACCTAATTTGAGGGATCGTCCCCT  | 0   | 10  | RDR2-sensitive |
| ACCTAATTTGAGGGATCGTCTCAT  | 2   | 14  | RDR2-sensitive |
| ACCTAATTTGAGGGATCGTTCCAT  | 0   | 13  | RDR2-sensitive |
| ACCTACAACCTCGGATGACGGGCC  | 1   | 14  | RDR2-sensitive |
| ACCTACAGGGTTGTCTGAGGTCTG  | 0   | 9   | RDR2-sensitive |

|                           |    |     |                |
|---------------------------|----|-----|----------------|
| ACCTACCTGTCCGATTGGTCGGCT  | 0  | 58  | RDR2-sensitive |
| ACCTACGAATCTCTCGGACTACGG  | 0  | 18  | RDR2-sensitive |
| ACCTACTCCTTGGACTACGGCGAA  | 0  | 28  | RDR2-sensitive |
| ACCTACTCTGGGCCGGACCGGCAC  | 1  | 17  | RDR2-sensitive |
| ACCTAGAACACTCGGCAAAGGCAC  | 0  | 11  | RDR2-sensitive |
| ACCTAGAACACTCGGCAAAGGCGC  | 0  | 11  | RDR2-sensitive |
| ACCTAGACATGCCGATCGGACTAA  | 0  | 9   | RDR2-sensitive |
| ACCTAGACTGAGAGAGGAGGGAGG  | 0  | 14  | RDR2-sensitive |
| ACCTAGATCACGGACCGTTCAGGC  | 0  | 14  | RDR2-sensitive |
| ACCTAGATCTGACCCTCAGGAGAG  | 0  | 12  | RDR2-sensitive |
| ACCTAGCAAGGTGTACCGTTGGGC  | 0  | 15  | RDR2-sensitive |
| ACCTAGCTGTAGGGGCGGCTCCTT  | 0  | 10  | RDR2-sensitive |
| ACCTAGGACACTCGACACTCGGCA  | 0  | 11  | RDR2-sensitive |
| ACCTAGGACACTCGGCAAAGACGC  | 1  | 13  | RDR2-sensitive |
| ACCTAGGACTGGGCCAGTAGGGCA  | 0  | 11  | RDR2-sensitive |
| ACCTAGGCCGTCGGAAATAAGCAT  | 0  | 13  | RDR2-sensitive |
| ACCTAGGCTGATAGAGGAGGGAGG  | 0  | 14  | RDR2-sensitive |
| ACCTAGGTCGTGGACTGTCCGGCC  | 3  | 49  | RDR2-sensitive |
| ACCTAGTATTGTAGAAGCTTCGGC  | 0  | 15  | RDR2-sensitive |
| ACCTATAGGTTGTTTCGCTTCGGAT | 0  | 12  | RDR2-sensitive |
| ACCTATCGGCGTTTCTGTTTCGGG  | 0  | 16  | RDR2-sensitive |
| ACCTATCGTAGACTGTCCGGCCGT  | 0  | 17  | RDR2-sensitive |
| ACCTATCGTTGTATTGGTCGGGTC  | 0  | 16  | RDR2-sensitive |
| ACCTATCTCGACGGCACAGATATT  | 0  | 9   | RDR2-sensitive |
| ACCTATCTGGGCTGGGGTACGCGG  | 0  | 9   | RDR2-sensitive |
| ACCTATCTTCAGGCTCATCGGACA  | 2  | 15  | RDR2-sensitive |
| ACCTATGGATTGGACGGGATTGGA  | 0  | 17  | RDR2-sensitive |
| ACCTATGGTAGACTGTACGGTGAC  | 0  | 15  | RDR2-sensitive |
| ACCTATTAAGACTGTAAGGGGTAG  | 0  | 20  | RDR2-sensitive |
| ACCTCAACGGTCGGCTGACGTGGC  | 0  | 9   | RDR2-sensitive |
| ACCTCAATCTGACTGGATGGCTGT  | 0  | 39  | RDR2-sensitive |
| ACCTCACGTGGTTCCTAGAACGGC  | 0  | 12  | RDR2-sensitive |
| ACCTCACTCGGATCGTCATGTGTC  | 0  | 11  | RDR2-sensitive |
| ACCTCCCGTCAGCAGTAGAGGCGC  | 0  | 20  | RDR2-sensitive |
| ACCTCCCTGGAAGGACTCAGTCGG  | 0  | 15  | RDR2-sensitive |
| ACCTCCTCCGTTGGATTGGTGGTA  | 0  | 19  | RDR2-sensitive |
| ACCTCGCCGGAGAAGACAGCTATC  | 0  | 17  | RDR2-sensitive |
| ACCTCGCGCTGGGCTGTGAGGCAG  | 54 | 7   | RDR2-resistant |
| ACCTCGCGTCTGTCTGGTGTTCGA  | 0  | 11  | RDR2-sensitive |
| ACCTCGGACGGGAGACGCAGTCAC  | 1  | 18  | RDR2-sensitive |
| ACCTCGGACGGGAGACGTAGTCAC  | 0  | 18  | RDR2-sensitive |
| ACCTCGGACGGTAGACGCAGTCAC  | 0  | 13  | RDR2-sensitive |
| ACCTCGGATACAGGTAGGATACGG  | 0  | 14  | RDR2-sensitive |
| ACCTCGGATACGGGTAGGATACGG  | 0  | 107 | RDR2-sensitive |
| ACCTCGGATTAGTTTTTTGTGGCG  | 1  | 16  | RDR2-sensitive |
| ACCTCGGGCGGGACACGCAGTCAC  | 0  | 10  | RDR2-sensitive |
| ACCTCGGGCGGGAGACGCAGTCAC  | 1  | 19  | RDR2-sensitive |
| ACCTCGGGGTTACTTGAGGGTCGG  | 0  | 17  | RDR2-sensitive |
| ACCTCGGGTAGAAGATAACAATCAT | 0  | 10  | RDR2-sensitive |

|                           |     |    |                |
|---------------------------|-----|----|----------------|
| ACCTCGGTTTGGCTCGGACAGGCT  | 0   | 9  | RDR2-sensitive |
| ACCTCGTCACAGGTCTTCGTCCGG  | 0   | 11 | RDR2-sensitive |
| ACCTCGTCACAGGTTTTTCGTCCGG | 0   | 12 | RDR2-sensitive |
| ACCTCTCAGGACAAAGTCGGTATT  | 0   | 9  | RDR2-sensitive |
| ACCTCTCCGGCCTGGGACGGTGCT  | 0   | 9  | RDR2-sensitive |
| ACCTCTCCTTCTGGGAGCGTCGGC  | 0   | 21 | RDR2-sensitive |
| ACCTCTCGCGGATAGACGGATGAT  | 0   | 13 | RDR2-sensitive |
| ACCTCTCTCGGACTCTACGTCAGT  | 0   | 12 | RDR2-sensitive |
| ACCTCTGCGGACGGCGATTTCCGGA | 0   | 14 | RDR2-sensitive |
| ACCTCTGTAGTTCAATTGGGGACG  | 0   | 9  | RDR2-sensitive |
| ACCTGAACACTTAGATGCTGGCCT  | 0   | 55 | RDR2-sensitive |
| ACCTGAACAGCATAGGGCCTGATT  | 0   | 10 | RDR2-sensitive |
| ACCTGAACCAGTGGGTACCTCTAA  | 0   | 9  | RDR2-sensitive |
| ACCTGAACCCGAGTAGACTGACAA  | 1   | 12 | RDR2-sensitive |
| ACCTGAACGAGCGGTGGCGCGCAT  | 0   | 12 | RDR2-sensitive |
| ACCTGAACGCTTGGATGCCGGCAT  | 0   | 10 | RDR2-sensitive |
| ACCTGAACGCTTGGATGCCGGCCT  | 0   | 14 | RDR2-sensitive |
| ACCTGAACTGATTCTGTGCACCAT  | 0   | 21 | RDR2-sensitive |
| ACCTGACAAGCTGACATCTGGTTC  | 0   | 13 | RDR2-sensitive |
| ACCTGACAGCACTCGGCAAAGAAT  | 0   | 15 | RDR2-sensitive |
| ACCTGACCTGGGCGCGGGACGAAC  | 0   | 13 | RDR2-sensitive |
| ACCTGACGACTAGTGAAGAGGCAT  | 0   | 17 | RDR2-sensitive |
| ACCTGAGCTCTGTGGAATGCACGT  | 152 | 36 | RDR2-resistant |
| ACCTGAGTCGTTGTAATGTGGCAT  | 0   | 17 | RDR2-sensitive |
| ACCTGATCATGTTGGACGGGCCGA  | 0   | 13 | RDR2-sensitive |
| ACCTGATCCAATCTGATCGCGGAC  | 0   | 21 | RDR2-sensitive |
| ACCTGATCTGACTGAAGAGGGCGT  | 0   | 28 | RDR2-sensitive |
| ACCTGATCTGCGACTGACTGACGG  | 0   | 25 | RDR2-sensitive |
| ACCTGATGCAAGATCTCGAAGGCG  | 0   | 11 | RDR2-sensitive |
| ACCTGATGCTGTTTCAGAGGTCGGA | 0   | 16 | RDR2-sensitive |
| ACCTGATGCTGTTTAGGGGTCGGA  | 11  | 35 | RDR2-sensitive |
| ACCTGATTGTTAGGCGAGAGGTAC  | 0   | 16 | RDR2-sensitive |
| ACCTGATTGTTTCGTTGTAGGGGTA | 0   | 15 | RDR2-sensitive |
| ACCTGCAATATTGTGTGACTCGAG  | 471 | 2  | RDR2-resistant |
| ACCTGCACGCGGACGGTTCGACGG  | 0   | 10 | RDR2-sensitive |
| ACCTGCATGCGCGGAGACGGGACC  | 0   | 14 | RDR2-sensitive |
| ACCTGCATGTCGTGACCAGGGCAA  | 22  | 0  | RDR2-resistant |
| ACCTGCCAAGAAGCTGATCAGCGT  | 0   | 11 | RDR2-sensitive |
| ACCTGCCGGTAGAAGTTCGTCGT   | 1   | 29 | RDR2-sensitive |
| ACCTGCGGAAGTGGTAGTTCGTGT  | 23  | 2  | RDR2-resistant |
| ACCTGCGGCAGGTACGAGGACTAC  | 0   | 9  | RDR2-sensitive |
| ACCTGCTAGGGTCGGATCGGTATG  | 0   | 12 | RDR2-sensitive |
| ACCTGCTCGAGCTCGGACCAGAGG  | 0   | 13 | RDR2-sensitive |
| ACCTGCTCGTTGTATTGGTCCGGTC | 1   | 28 | RDR2-sensitive |
| ACCTGCTCTGACAAACTAACGGCT  | 17  | 1  | RDR2-resistant |
| ACCTGCTCTGACAGGGCAACGGCT  | 0   | 9  | RDR2-sensitive |
| ACCTGCTGGTACTGTATCGGCTAT  | 0   | 13 | RDR2-sensitive |
| ACCTGCTGGTGCAGTCTGACATGT  | 0   | 11 | RDR2-sensitive |
| ACCTGGAAGTGAAGGCGCGCCTGG  | 0   | 18 | RDR2-sensitive |

|                            |      |     |                |
|----------------------------|------|-----|----------------|
| ACCTGGAAGCGGAGCTCGGCGCGT   | 0    | 9   | RDR2-sensitive |
| ACCTGGACACGGATGGCCTGGCAA   | 0    | 13  | RDR2-sensitive |
| ACCTGGACCGTTGCAACGATGGCG   | 0    | 10  | RDR2-sensitive |
| ACCTGGACCGTTGCAGCGATGGCG   | 3    | 27  | RDR2-sensitive |
| ACCTGGACGCAGGAGCGGATCCTC   | 0    | 11  | RDR2-sensitive |
| ACCTGGACGGGGTGTACTCGGAA    | 0    | 18  | RDR2-sensitive |
| ACCTGGACTGGAGAAGATGGTGCC   | 0    | 11  | RDR2-sensitive |
| ACCTGGAGGAGACGCTGGAAACGC   | 1    | 14  | RDR2-sensitive |
| ACCTGGATCATGTGGAAGACGACT   | 0    | 25  | RDR2-sensitive |
| ACCTGGCACGGTCGTGACTCGGCA   | 0    | 9   | RDR2-sensitive |
| ACCTGGCAGAAGGACCGTTGGACA   | 0    | 21  | RDR2-sensitive |
| ACCTGGCCGTGGATTGTTACGGAT   | 0    | 11  | RDR2-sensitive |
| ACCTGGCGCGTCAACTGTCGGCGT   | 2    | 14  | RDR2-sensitive |
| ACCTGGCGGCTGGTGTACATAGAC   | 37   | 3   | RDR2-resistant |
| ACCTGGCTCTGACGTGGCGGCGGC   | 0    | 28  | RDR2-sensitive |
| ACCTGGCTCTGACGTGGTGGCGGC   | 1    | 15  | RDR2-sensitive |
| ACCTGGCTCTGATACCAAGTGTTG   | 0    | 9   | RDR2-sensitive |
| ACCTGGCTCTGATACCACTGAAGG   | 211  | 0   | RDR2-resistant |
| ACCTGGGACACTCGACAAAGACGC   | 0    | 12  | RDR2-sensitive |
| ACCTGGGACACTCGGCAAAGACGC   | 1    | 26  | RDR2-sensitive |
| ACCTGGGACACTCGGTAAAGACGC   | 0    | 10  | RDR2-sensitive |
| ACCTGGGCGCGGGACGAACACGAA   | 10   | 32  | RDR2-sensitive |
| ACCTGGGGTGTAGAAGGCAGGCGC   | 0    | 23  | RDR2-sensitive |
| ACCTGGTAGTGCAGAATCTCGGTG   | 0    | 16  | RDR2-sensitive |
| ACCTGGTCGGTACGTGGTTCGAGGC  | 0    | 27  | RDR2-sensitive |
| ACCTGGTCGGTACGTGGTTCGGGGC  | 7    | 154 | RDR2-sensitive |
| ACCTGGTCGGTACGTGGTTGGGGC   | 0    | 13  | RDR2-sensitive |
| ACCTGGTCGGTGGGTGGTTCGGTGC  | 1    | 13  | RDR2-sensitive |
| ACCTGGTCGGTGGGTGGTTGGGGC   | 0    | 9   | RDR2-sensitive |
| ACCTGGTCGGTGTCTGGTTCGGGGC  | 1    | 22  | RDR2-sensitive |
| ACCTGGTCGGTTGCTGGTTCGGGGC  | 0    | 13  | RDR2-sensitive |
| ACCTGGTGCGGCTGAACCGGATGG   | 0    | 11  | RDR2-sensitive |
| ACCTGGTTGGTTCGGCCTGGTTCGGT | 0    | 11  | RDR2-sensitive |
| ACCTGGTTTTGGAGATCGCTGGAG   | 0    | 10  | RDR2-sensitive |
| ACCTGGTTTTGTTCGGCTACGGTT   | 26   | 3   | RDR2-resistant |
| ACCTGTAAGAGCCTTTGACGGGAG   | 0    | 22  | RDR2-sensitive |
| ACCTGTAAGAGGCTTTTGACGGAT   | 0    | 14  | RDR2-sensitive |
| ACCTGTAGAAGGGCCGAGCGGCGT   | 0    | 9   | RDR2-sensitive |
| ACCTGTAGAGCCCGAGAGGCGAGA   | 0    | 9   | RDR2-sensitive |
| ACCTGTAGCGCTGACTCTTGCCAT   | 1154 | 149 | RDR2-resistant |
| ACCTGTAGCGCTGACTCTTGCCCT   | 32   | 5   | RDR2-resistant |
| ACCTGTAGGCGCGGATCGTCCGGC   | 0    | 13  | RDR2-sensitive |
| ACCTGTAGGGGCACGTAGATGGCA   | 0    | 11  | RDR2-sensitive |
| ACCTGTAGGTCCACCAGATAACGT   | 2    | 78  | RDR2-sensitive |
| ACCTGTAGTACCTATGCATGTTGA   | 15   | 0   | RDR2-resistant |
| ACCTGTAGTCCTATGCGCGTGCAT   | 0    | 34  | RDR2-sensitive |
| ACCTGTAGTGCACCGACGCGCCCT   | 0    | 13  | RDR2-sensitive |
| ACCTGTATGGCATACTCTCGTCCT   | 1    | 37  | RDR2-sensitive |
| ACCTGTATGTGCCTGCCAGACGTG   | 0    | 24  | RDR2-sensitive |

|                           |     |     |                |
|---------------------------|-----|-----|----------------|
| ACCTGTCAGAGACCGAACCGGCAG  | 0   | 11  | RDR2-sensitive |
| ACCTGTCATCGGAACGAGGGGAGA  | 0   | 9   | RDR2-sensitive |
| ACCTGTCGCGTAGGACAGTTCGGC  | 0   | 30  | RDR2-sensitive |
| ACCTGTCGGATTGGTCGGCTTGGG  | 0   | 18  | RDR2-sensitive |
| ACCTGTCTGTTGCATTGGTCGGAT  | 0   | 12  | RDR2-sensitive |
| ACCTGTGAAGCAAGAACCGACGCC  | 0   | 9   | RDR2-sensitive |
| ACCTGTGACTGTAGCTTCGGCTAA  | 0   | 10  | RDR2-sensitive |
| ACCTGTGCAAGTGTAGATCTGCCG  | 0   | 13  | RDR2-sensitive |
| ACCTGTGGACGCCTACACTAACAT  | 0   | 13  | RDR2-sensitive |
| ACCTGTGGCTGAAAAGTGTGGCGC  | 0   | 15  | RDR2-sensitive |
| ACCTGTGGGTCTGTTATTGGGCAA  | 4   | 30  | RDR2-sensitive |
| ACCTGTGGGTCTTGTCGAGTCGGA  | 0   | 13  | RDR2-sensitive |
| ACCTGTGTGGTGCTCTGTCTGTTC  | 0   | 39  | RDR2-sensitive |
| ACCTGTTAGACGGTGTAGGCGATG  | 0   | 10  | RDR2-sensitive |
| ACCTGTTATGAACCTTGTCGGGAT  | 44  | 3   | RDR2-resistant |
| ACCTGTTTCAGGAGTAGGACGGAGC | 0   | 11  | RDR2-sensitive |
| ACCTGTTTCGTTGCCGGAGAAGGAC | 1   | 21  | RDR2-sensitive |
| ACCTGTTTCGTTGGTGGAACGACGG | 300 | 40  | RDR2-resistant |
| ACCTGTTCTTGACGTAGAGGATGT  | 0   | 11  | RDR2-sensitive |
| ACCTGTTGACTACTGTGTCGGGCC  | 0   | 14  | RDR2-sensitive |
| ACCTGTTTGGCACGAAGCACGATG  | 0   | 11  | RDR2-sensitive |
| ACCTGTTTGGCACGGCTCCTCTAG  | 0   | 9   | RDR2-sensitive |
| ACCTGTTTGGCACGGCTCCTTCAG  | 0   | 12  | RDR2-sensitive |
| ACCTTAAAGGGATTCTTGAGACGG  | 24  | 1   | RDR2-resistant |
| ACCTTAAACGAGCCGAGCCGAGCTG | 0   | 17  | RDR2-sensitive |
| ACCTTAAAGGCTGGAGCGAGGGCGT | 0   | 78  | RDR2-sensitive |
| ACCTTAAAGTAGTGGACGAGGGCAG | 0   | 40  | RDR2-sensitive |
| ACCTTACTGGACGCCTAGAGGACG  | 0   | 103 | RDR2-sensitive |
| ACCTTACTGGACGTGTAGAGGACG  | 0   | 42  | RDR2-sensitive |
| ACCTTATGTGACGTAGGACCACAC  | 0   | 12  | RDR2-sensitive |
| ACCTTATTTGAGGAATCGTCTCGT  | 0   | 10  | RDR2-sensitive |
| ACCTTATTTGAGGGATCGTCATGT  | 0   | 13  | RDR2-sensitive |
| ACCTTATTTGAGGGATCGTCCCCT  | 0   | 35  | RDR2-sensitive |
| ACCTTATTTGAGGGATCGTCTCAT  | 5   | 27  | RDR2-sensitive |
| ACCTTATTTGAGGGATCGTCTCGT  | 0   | 21  | RDR2-sensitive |
| ACCTTATTTGAGGGATCGTTCCAT  | 0   | 15  | RDR2-sensitive |
| ACCTTATTTGAGGGATCGTTCTAT  | 0   | 9   | RDR2-sensitive |
| ACCTTCACGGGAGGGAGGACCATC  | 14  | 0   | RDR2-resistant |
| ACCTTCATACTGTAGTAACGGATA  | 0   | 12  | RDR2-sensitive |
| ACCTTCATACTGTAGTAACGGGTA  | 1   | 19  | RDR2-sensitive |
| ACCTTCCATCTGTAGTATTCGGTT  | 0   | 11  | RDR2-sensitive |
| ACCTTCGGGGCGTGTTAGACTGGC  | 0   | 10  | RDR2-sensitive |
| ACCTTCGTCGTTTCGCATACTTGGT | 0   | 13  | RDR2-sensitive |
| ACCTTCTAGTGGACTCGGGGATAT  | 0   | 14  | RDR2-sensitive |
| ACCTTCTCTGGACACGTGGCGGCT  | 0   | 9   | RDR2-sensitive |
| ACCTTGCAGTAGACCTTCCGATA   | 0   | 11  | RDR2-sensitive |
| ACCTTGCGGGACTGGTCATCGGGC  | 0   | 25  | RDR2-sensitive |
| ACCTTGCTGAGCGAAGAACGACGA  | 0   | 9   | RDR2-sensitive |
| ACCTTGCTGGGCGTGTAGAGGACG  | 0   | 140 | RDR2-sensitive |



|                            |    |    |                |
|----------------------------|----|----|----------------|
| ACCTTGGACGACGTGTTTTGGCAT   | 0  | 39 | RDR2-sensitive |
| ACCTTGGACGGCGTGTTTTGGCAT   | 0  | 11 | RDR2-sensitive |
| ACCTTGGGCGGGAGACGTAGTCAC   | 0  | 11 | RDR2-sensitive |
| ACCTTGGTCGGGCCGAGCAGGGAG   | 0  | 11 | RDR2-sensitive |
| ACCTTGTCAAGCTGTGGCTACTTAAA | 17 | 1  | RDR2-resistant |
| ACCTTGTCAAGCTGTATTGCATC    | 25 | 2  | RDR2-resistant |
| ACCTTGTGATGTTAACTTTGTGAT   | 21 | 2  | RDR2-resistant |
| ACCTTTGGCATGGTTTGTCCGGTCA  | 79 | 1  | RDR2-resistant |
| ACCTTTGTTTCGGCGGCTCGGCACC  | 0  | 15 | RDR2-sensitive |
| ACCTTTGTTTGTCTCGGTACTTCGG  | 22 | 0  | RDR2-resistant |
| ACGAAAAAGTGAACCGGAGGCAG    | 0  | 9  | RDR2-sensitive |
| ACGAAACAGTGACTGGGACCGCAT   | 0  | 12 | RDR2-sensitive |
| ACGAAAGTCGTCGACGGTGTTTAG   | 0  | 15 | RDR2-sensitive |
| ACGAACACGGCTATAGTCAATGCA   | 0  | 12 | RDR2-sensitive |
| ACGAACACGGTACACAATCTGATC   | 17 | 0  | RDR2-resistant |
| ACGAACAGACATGGTACGGCTCAC   | 0  | 23 | RDR2-sensitive |
| ACGAACAGGGCAACAGACGAACAG   | 0  | 19 | RDR2-sensitive |
| ACGAACATGAAGTCCGGTCAGGAC   | 0  | 11 | RDR2-sensitive |
| ACGAACCAGCGACGGTGTCTCTG    | 0  | 9  | RDR2-sensitive |
| ACGAACCATGAACGATCGGACGAA   | 0  | 11 | RDR2-sensitive |
| ACGAACCGAGCGAGCCGACGAGCC   | 0  | 17 | RDR2-sensitive |
| ACGAACCGCGGAACAGGATTCGGC   | 0  | 13 | RDR2-sensitive |
| ACGAACGCACGGCAGGAGAGACGA   | 0  | 12 | RDR2-sensitive |
| ACGAACGGACAATGGCGACGTGCA   | 0  | 31 | RDR2-sensitive |
| ACGAACGGACGGCTTAGATTGGCT   | 0  | 10 | RDR2-sensitive |
| ACGAACTAAGACTCTCCACGGCAC   | 0  | 14 | RDR2-sensitive |
| ACGAACTGGGGGAGACGACCGAAC   | 0  | 27 | RDR2-sensitive |
| ACGAAGACGCAGGCAACCGAACAC   | 0  | 10 | RDR2-sensitive |
| ACGAAGAGGGACGGAAGAGGACAA   | 0  | 10 | RDR2-sensitive |
| ACGAAGCACGATAGACTTGGGCCA   | 0  | 22 | RDR2-sensitive |
| ACGAAGGCAGAACGGCAGAACGGC   | 0  | 10 | RDR2-sensitive |
| ACGAAGGGGGCACGGTAGAGGGCT   | 0  | 10 | RDR2-sensitive |
| ACGAAGTCGGTGCAGGAAGATGTA   | 1  | 31 | RDR2-sensitive |
| ACGAATAAGCGGGTCCGGCTCGGA   | 0  | 24 | RDR2-sensitive |
| ACGAATAAGCGGGTTGGCTCGGAC   | 0  | 11 | RDR2-sensitive |
| ACGAATACGGATATTTCCGGATCTC  | 0  | 11 | RDR2-sensitive |
| ACGAATATTTTGTCCGATATCGT    | 0  | 14 | RDR2-sensitive |
| ACGAATCCTGGATGAGACGTGACA   | 0  | 16 | RDR2-sensitive |
| ACGAATTTCTGGGGCATCGTCACT   | 53 | 0  | RDR2-resistant |
| ACGAATTTTATAGAAGCTGGCTGA   | 1  | 64 | RDR2-sensitive |
| ACGACAACCCTGTAGAGCGCGGCG   | 0  | 19 | RDR2-sensitive |
| ACGACAAGAGAACCGGCTCAACAA   | 0  | 16 | RDR2-sensitive |
| ACGACACGAGGCTGGACGGTCCGC   | 0  | 15 | RDR2-sensitive |
| ACGACACGATTAAGTGGCCGGCAC   | 0  | 12 | RDR2-sensitive |
| ACGACACGCGGAACGACGACGAGA   | 0  | 24 | RDR2-sensitive |
| ACGACACGGAAGAGGCTTAAACAG   | 0  | 22 | RDR2-sensitive |
| ACGACACGGCACGATTGGAACAG    | 0  | 11 | RDR2-sensitive |
| ACGACACGTCCATGTCTAGATCGT   | 0  | 24 | RDR2-sensitive |
| ACGACACTGTACAACATTTTCGGC   | 0  | 12 | RDR2-sensitive |

|                          |     |     |                |
|--------------------------|-----|-----|----------------|
| ACGACACTGTATCGGCCCGATCGT | 0   | 15  | RDR2-sensitive |
| ACGACAGACGAACTAAGTCGCGGC | 0   | 25  | RDR2-sensitive |
| ACGACAGACGAACTACGTCACGGC | 0   | 9   | RDR2-sensitive |
| ACGACAGAGGAACACACGAGACAC | 0   | 30  | RDR2-sensitive |
| ACGACAGTCGAATCGGCAACAAAG | 0   | 12  | RDR2-sensitive |
| ACGACAGTCGAATCGGCAATAGAG | 0   | 11  | RDR2-sensitive |
| ACGACATGATTAGGACACGGCCTG | 0   | 13  | RDR2-sensitive |
| ACGACCAAGGGCTGGACGGTCCGC | 0   | 14  | RDR2-sensitive |
| ACGACCAGATGCGAGCGCTCTCAT | 0   | 9   | RDR2-sensitive |
| ACGACCAGTGAAGCAGATCGACAT | 1   | 18  | RDR2-sensitive |
| ACGACCCAGTAGAGCAGGCAGTGC | 0   | 29  | RDR2-sensitive |
| ACGACCCGGAATAGCTCAGAGGCT | 0   | 15  | RDR2-sensitive |
| ACGACCTAGAACCGGACGGTCCAC | 0   | 44  | RDR2-sensitive |
| ACGACCTAGTAGCAGGAACGACGT | 2   | 139 | RDR2-sensitive |
| ACGACCTGACTTGGCATACTCCGT | 23  | 3   | RDR2-resistant |
| ACGACCTTCTATGTCATCGCGGAC | 0   | 19  | RDR2-sensitive |
| ACGACGACGCTGTAGTGAGGTTGC | 0   | 12  | RDR2-sensitive |
| ACGACGACTGTACAGATTACGCCG | 0   | 10  | RDR2-sensitive |
| ACGACGATCAGATCGAGTCGGCAC | 0   | 18  | RDR2-sensitive |
| ACGACGGACATTGTGGTACGGTGT | 1   | 26  | RDR2-sensitive |
| ACGACGGATGCGGCTTCGACGAAA | 0   | 9   | RDR2-sensitive |
| ACGACGGCAGAACGGCAGAACGGC | 0   | 17  | RDR2-sensitive |
| ACGACGGCCGTTAGATGGGAGACG | 0   | 9   | RDR2-sensitive |
| ACGACGGCCGTTGGATGGAAGACG | 0   | 15  | RDR2-sensitive |
| ACGACGGTATCTGACTTTGTGCCA | 40  | 0   | RDR2-resistant |
| ACGACGTGGTTTAGAGCTAGGCTG | 0   | 19  | RDR2-sensitive |
| ACGACGTGGTTTAGGACTAGGCTG | 0   | 9   | RDR2-sensitive |
| ACGACTAACAGACTCACGGGCCGT | 0   | 16  | RDR2-sensitive |
| ACGACTAAGGGTATACGTGAGCAC | 0   | 26  | RDR2-sensitive |
| ACGACTACTAGACTGGCGTGACGT | 0   | 17  | RDR2-sensitive |
| ACGACTAGCAAACGACGGACCGT  | 0   | 14  | RDR2-sensitive |
| ACGACTAGCACACTGACGGGCCGT | 1   | 32  | RDR2-sensitive |
| ACGACTAGCAGACTGACGGGCCGT | 0   | 9   | RDR2-sensitive |
| ACGACTAGCAGGCTGACGGGCCGT | 2   | 16  | RDR2-sensitive |
| ACGACTAGTGTATTCATACGGTTA | 32  | 0   | RDR2-resistant |
| ACGACTATTGGACCGGGCTGGCCT | 0   | 12  | RDR2-sensitive |
| ACGACTCCCGATCTTTCGGCTCCA | 0   | 12  | RDR2-sensitive |
| ACGACTCCTGATCTTTCGGCTCCA | 0   | 24  | RDR2-sensitive |
| ACGACTCGACTGTGAACGGCGCAA | 1   | 12  | RDR2-sensitive |
| ACGACTCGAGCATGATGTAGGCAC | 0   | 9   | RDR2-sensitive |
| ACGACTCGCTCTAGGGTTCGTCGG | 0   | 11  | RDR2-sensitive |
| ACGACTCTAGCTCCTTGATGGCTC | 0   | 11  | RDR2-sensitive |
| ACGACTCTCGGCAACGGATATCTC | 164 | 37  | RDR2-resistant |
| ACGACTCTGACGATTTGACGGCCA | 0   | 26  | RDR2-sensitive |
| ACGACTCTGACGATTTGGCGGCGA | 0   | 9   | RDR2-sensitive |
| ACGACTCTGAGTCAAGGACGACAC | 44  | 0   | RDR2-resistant |
| ACGACTCTGGCAGCCGTTAGATGT | 0   | 37  | RDR2-sensitive |
| ACGACTGACGATTTGACAGCGGCC | 0   | 12  | RDR2-sensitive |
| ACGACTGACGATTTGACGGCGGCC | 2   | 45  | RDR2-sensitive |

|                          |    |    |                |
|--------------------------|----|----|----------------|
| ACGACTGAGGGAGGCCGCCAGTGC | 0  | 10 | RDR2-sensitive |
| ACGACTGATAGGTAGATTGGCCGC | 0  | 10 | RDR2-sensitive |
| ACGACTGCACGGCACTGCTCGACG | 25 | 2  | RDR2-resistant |
| ACGACTGCAGGCAGAACCGTGAC  | 0  | 11 | RDR2-sensitive |
| ACGACTGGAGTTTGAACGGTCTA  | 0  | 9  | RDR2-sensitive |
| ACGACTGGGAGTAGAGCAGGGCAC | 0  | 14 | RDR2-sensitive |
| ACGACTGTACAGATCGCGCCGCAT | 0  | 12 | RDR2-sensitive |
| ACGACTGTACAGATTACGCCACAT | 0  | 9  | RDR2-sensitive |
| ACGACTGTACAGATTACGCCGCAT | 1  | 32 | RDR2-sensitive |
| ACGACTGTACAGATTGCGCCACAT | 2  | 45 | RDR2-sensitive |
| ACGACTGTACAGATTGCGTCACAT | 0  | 10 | RDR2-sensitive |
| ACGACTGTAGGAAGCCGTCGGATA | 1  | 29 | RDR2-sensitive |
| ACGACTGTATAGATTGCGTCACAT | 0  | 17 | RDR2-sensitive |
| ACGACTGTCAGAGCAGGCCGTCAG | 0  | 9  | RDR2-sensitive |
| ACGACTGTCTCCAGTAGAGCGCGT | 0  | 11 | RDR2-sensitive |
| ACGACTGTCTGACGTAGAGATGGC | 0  | 13 | RDR2-sensitive |
| ACGACTGTGAGCTACAACGGTGTC | 0  | 9  | RDR2-sensitive |
| ACGACTGTGATCTAGGGAGGCCAT | 1  | 13 | RDR2-sensitive |
| ACGACTGTGCTTGAACACGTGCAT | 0  | 34 | RDR2-sensitive |
| ACGACTGTGGTTAGGCTAGTGCTC | 0  | 9  | RDR2-sensitive |
| ACGACTTAAAACGCGACGGGGCAT | 35 | 6  | RDR2-resistant |
| ACGACTTCTTAGGACGGCAGTAGA | 0  | 16 | RDR2-sensitive |
| ACGACTTGACGGTAAACGCGAGCA | 0  | 10 | RDR2-sensitive |
| ACGACTTTGGCTCTTTGATGGCTC | 0  | 10 | RDR2-sensitive |
| ACGAGACACAGGCGCTGATGCATA | 0  | 10 | RDR2-sensitive |
| ACGAGACGGATACGGGACGAGCAG | 0  | 10 | RDR2-sensitive |
| ACGAGACGTAGTGAACGGACCGA  | 0  | 9  | RDR2-sensitive |
| ACGAGACTGTGCATCCGTCCCCGT | 0  | 9  | RDR2-sensitive |
| ACGAGAGAGGACGACAAGGGACAT | 0  | 17 | RDR2-sensitive |
| ACGAGAGCTGTAGCCCAGGAGCGC | 0  | 12 | RDR2-sensitive |
| ACGAGATCAGGCCCTTGTGGACGG | 0  | 10 | RDR2-sensitive |
| ACGAGATGAAGACGCCAGGAACCA | 0  | 9  | RDR2-sensitive |
| ACGAGATGCAGAGCTGCTTGTCGG | 0  | 24 | RDR2-sensitive |
| ACGAGCAACTGCTAGAGTGGGCAA | 0  | 10 | RDR2-sensitive |
| ACGAGCACACGGACTTAGATGGCC | 0  | 9  | RDR2-sensitive |
| ACGAGCAGATTGGTCGCATCTCTA | 1  | 21 | RDR2-sensitive |
| ACGAGCAGCTGGGTTGGAGGAATC | 29 | 4  | RDR2-resistant |
| ACGAGCCAGCTCGGATCGACTCGT | 0  | 11 | RDR2-sensitive |
| ACGAGCCCACGGACTTAGATGGCC | 0  | 23 | RDR2-sensitive |
| ACGAGCCCGTGGACTTAGACGGCT | 0  | 14 | RDR2-sensitive |
| ACGAGCTAACAGTCGGCGTGTCGT | 0  | 14 | RDR2-sensitive |
| ACGAGCTATAGAGCGTGACGGCAC | 0  | 10 | RDR2-sensitive |
| ACGAGCTCGATTAGGACACGGCAC | 0  | 21 | RDR2-sensitive |
| ACGAGGACGCCACCAACATCGCCG | 60 | 1  | RDR2-resistant |
| ACGAGGACTCTACGCGGACCACAA | 0  | 15 | RDR2-sensitive |
| ACGAGGAGGGCAGAACGGCAGAAC | 0  | 14 | RDR2-sensitive |
| ACGAGGATCGGTAACACTGCCAAG | 0  | 9  | RDR2-sensitive |
| ACGAGTCTGAACACGTAGCAACGG | 0  | 9  | RDR2-sensitive |
| ACGATAATCGGTCTAGACTGGCAT | 0  | 9  | RDR2-sensitive |

|                            |    |    |                |
|----------------------------|----|----|----------------|
| ACGATACCCGTCGTCTCGCTGGAC   | 0  | 13 | RDR2-sensitive |
| ACGATACTGAACCATACCGGGCTT   | 0  | 9  | RDR2-sensitive |
| ACGATAGGACACCTGATCACGGTC   | 0  | 19 | RDR2-sensitive |
| ACGATAGGCTTAGACCAGACTGGC   | 0  | 13 | RDR2-sensitive |
| ACGATAGGTCTGGACCGTGCCGGC   | 0  | 10 | RDR2-sensitive |
| ACGATATAGGGCTGGACGGTTCAC   | 2  | 37 | RDR2-sensitive |
| ACGATATGGTTGAAGCTCGACGGT   | 0  | 19 | RDR2-sensitive |
| ACGATCATGCCGTGACGATCTGAT   | 0  | 12 | RDR2-sensitive |
| ACGATCGGATGCACGGCTACCTGC   | 0  | 14 | RDR2-sensitive |
| ACGATCTAGACATGGACGTGCCGT   | 0  | 24 | RDR2-sensitive |
| ACGATCTGAGCTAGCGCGGGCGTA   | 0  | 24 | RDR2-sensitive |
| ACGATGAGACTGGAGTAGAGGCCG   | 0  | 16 | RDR2-sensitive |
| ACGATGAGTATTTCTGATCGTTGG   | 1  | 99 | RDR2-sensitive |
| ACGATGCGCGGGGTAGACAAACGG   | 1  | 35 | RDR2-sensitive |
| ACGATGGACGAACTATGTCGCGGC   | 0  | 19 | RDR2-sensitive |
| ACGATGGACGTATGGATGGCCAGC   | 0  | 20 | RDR2-sensitive |
| ACGATGTTCTGTTTGTAAACGGTTG  | 51 | 6  | RDR2-resistant |
| ACGATTCGGTAGATTATAATGGCA   | 0  | 62 | RDR2-sensitive |
| ACGATTCGGTGGATTATAATGGCA   | 2  | 22 | RDR2-sensitive |
| ACGATTCGTATAGCACTTCGGCAC   | 0  | 12 | RDR2-sensitive |
| ACGATTGACGCGGAATTTCCGGTTG  | 1  | 12 | RDR2-sensitive |
| ACGATTGGACACGGCCTGACTCAG   | 0  | 14 | RDR2-sensitive |
| ACGATTTCTAACCGGATTGTCTGT   | 0  | 19 | RDR2-sensitive |
| ACGATTTGTAGAGTATACATCAAG   | 0  | 13 | RDR2-sensitive |
| ACGATTTTCGGACCGTATCGGCAT   | 0  | 9  | RDR2-sensitive |
| ACGCAATTGTCTTTTTTCGCTCGGT  | 0  | 20 | RDR2-sensitive |
| ACGCACATATAGTGACGCTGGACG   | 0  | 9  | RDR2-sensitive |
| ACGCACATTGGTGGTACGCTGGAC   | 0  | 10 | RDR2-sensitive |
| ACGCACCGGACTGTCCGATGTGCA   | 0  | 12 | RDR2-sensitive |
| ACGCAGAACTGTGCAGGCCCGACC   | 0  | 15 | RDR2-sensitive |
| ACGCAGAACTGTGCTGGCCCGGCC   | 0  | 13 | RDR2-sensitive |
| ACGCAGAACTCGGTTCGAGACGTCAC | 0  | 9  | RDR2-sensitive |
| ACGCAGATCGAGCATAGAACCGGC   | 0  | 9  | RDR2-sensitive |
| ACGCAGCACACTCACTCGTCCGGCT  | 0  | 20 | RDR2-sensitive |
| ACGCAGCACGTACCTCGGCGCCAT   | 0  | 21 | RDR2-sensitive |
| ACGCAGCAGGCCCTACCTGGCGC    | 0  | 9  | RDR2-sensitive |
| ACGCAGCGACAATTTACTCGTCGG   | 0  | 9  | RDR2-sensitive |
| ACGCAGCTGCAGAAGGGACGACAC   | 0  | 12 | RDR2-sensitive |
| ACGCAGGACGTAACATGAGAGCGG   | 0  | 26 | RDR2-sensitive |
| ACGCAGGACTGTGCAGGCACGACT   | 0  | 18 | RDR2-sensitive |
| ACGCAGGACTGTGCAGGCACGGCA   | 1  | 47 | RDR2-sensitive |
| ACGCAGGACTGTGCAGGCACGGCC   | 1  | 21 | RDR2-sensitive |
| ACGCAGGACTGTGCAGGCCCGGCC   | 2  | 99 | RDR2-sensitive |
| ACGCAGGACTGTGTAGGCCCGGCC   | 1  | 71 | RDR2-sensitive |
| ACGCAGGCGACAGACAAACTCCAA   | 0  | 17 | RDR2-sensitive |
| ACGCAGGGGCGGGCCAGAAATTTG   | 29 | 0  | RDR2-resistant |
| ACGCATAGACGGTAGGGCAGGTAA   | 0  | 13 | RDR2-sensitive |
| ACGCATAGGAAGACGAACGGACAG   | 0  | 10 | RDR2-sensitive |
| ACGCATCTGTGGAGCCAGGCTCAC   | 0  | 9  | RDR2-sensitive |

|                          |    |    |                |
|--------------------------|----|----|----------------|
| ACGCCAAAATGGACATGAGACGGT | 0  | 10 | RDR2-sensitive |
| ACGCCAACGCCTCCATTTGTCGA  | 0  | 9  | RDR2-sensitive |
| ACGCCAACTGTTCAACACGTGCAC | 0  | 13 | RDR2-sensitive |
| ACGCCAGAAGTTGGACGTTTGGTT | 0  | 13 | RDR2-sensitive |
| ACGCCAGACTGCTGACTGTACGGC | 0  | 17 | RDR2-sensitive |
| ACGCCAGATGCAGGGGACGACTGT | 0  | 10 | RDR2-sensitive |
| ACGCCAGGTCGCGGACCGTCCGGC | 2  | 85 | RDR2-sensitive |
| ACGCCATCGTAGGTCGTTCTCGGG | 0  | 17 | RDR2-sensitive |
| ACGCCATTGCTGTAGAAGTGTGCA | 0  | 16 | RDR2-sensitive |
| ACGCCCAGCGCACGATCTGTTGAC | 0  | 13 | RDR2-sensitive |
| ACGCCCATTCACCGTCGGTACGTT | 0  | 12 | RDR2-sensitive |
| ACGCCCCCCGTTGTACGTCTGGAC | 0  | 17 | RDR2-sensitive |
| ACGCCGGCGCTCGGACGGAAGGCG | 0  | 19 | RDR2-sensitive |
| ACGCCGGTGACGAACTCCAAGCGG | 0  | 75 | RDR2-sensitive |
| ACGCCGTCTCTACTGATCGTCTT  | 0  | 10 | RDR2-sensitive |
| ACGCCGTGCGACTGGGTAGGCAGC | 0  | 70 | RDR2-sensitive |
| ACGCCGTTGGATTTGAGGGGAAGG | 17 | 1  | RDR2-resistant |
| ACGCCTCAAATCGTCAAGCCGC   | 0  | 76 | RDR2-sensitive |
| ACGCCTGAGCGCTCGGACTATGGC | 0  | 10 | RDR2-sensitive |
| ACGCCTGCTAGACGAGTCGGACAC | 0  | 50 | RDR2-sensitive |
| ACGCCTGGTGGGCTGTGGACCGGC | 1  | 24 | RDR2-sensitive |
| ACGCCTGTAAGACGAGTCGGACAC | 0  | 17 | RDR2-sensitive |
| ACGCCTTCGTTGGATGTGGACGGC | 0  | 13 | RDR2-sensitive |
| ACGCCTTCTTTGGAGGCCGTCGGA | 0  | 21 | RDR2-sensitive |
| ACGCCTTGGGAAATCATCGTCGC  | 0  | 9  | RDR2-sensitive |
| ACGCGACAAATGGGACACACGGAG | 0  | 13 | RDR2-sensitive |
| ACGCGACATGACGAGTACCGATGA | 0  | 9  | RDR2-sensitive |
| ACGCGACGGCGGATCTGGCGGCCG | 0  | 16 | RDR2-sensitive |
| ACGCGACGGGGCATTGTAAGTGGC | 31 | 3  | RDR2-resistant |
| ACGCGACGTCGTACGCCTCGGCTA | 0  | 15 | RDR2-sensitive |
| ACGCGACTCAGCGATGGCGGTCTG | 2  | 14 | RDR2-sensitive |
| ACGCGACTCTGTCAGGAACGGAAC | 0  | 37 | RDR2-sensitive |
| ACGCGACTGCTCGTGATCTGCTGA | 5  | 21 | RDR2-sensitive |
| ACGCGACTGCTCGTGATCTTCTGA | 3  | 27 | RDR2-sensitive |
| ACGCGATATGGCAGAACCGTGCGC | 0  | 12 | RDR2-sensitive |
| ACGCGATCGGCTGAAGATGCGCCG | 0  | 12 | RDR2-sensitive |
| ACGCGATGGTAGAACGTGGCGCAC | 0  | 10 | RDR2-sensitive |
| ACGCGCAGCGCGTCGGCAGGGGCG | 17 | 1  | RDR2-resistant |
| ACGCGCAGGATGACTTCTTTTACT | 1  | 20 | RDR2-sensitive |
| ACGCGCCGAATCAGCAGGGTTCGA | 4  | 82 | RDR2-sensitive |
| ACGCGCCTGTAGGGCGGACGGTCC | 0  | 9  | RDR2-sensitive |
| ACGCGCGACACTTGCAAACGACAT | 0  | 9  | RDR2-sensitive |
| ACGCGCGACATAGCATGCTGACGG | 0  | 31 | RDR2-sensitive |
| ACGCGCTAGCTGAAGGTCGTCCGT | 0  | 9  | RDR2-sensitive |
| ACGCGCTCGACCCATCTGGGCTGG | 0  | 9  | RDR2-sensitive |
| ACGCGCTGTGGCAGAACCGTGCAC | 0  | 15 | RDR2-sensitive |
| ACGCGGAAACGAGCATGCTGGCAC | 0  | 9  | RDR2-sensitive |
| ACGCGGAAGGCGGTCTGAACTCTA | 0  | 11 | RDR2-sensitive |
| ACGCGGAATAGAACGGCTCCATTC | 0  | 12 | RDR2-sensitive |

|                             |    |    |                |
|-----------------------------|----|----|----------------|
| ACGCGGACGGCTGACGGACGACGC    | 0  | 14 | RDR2-sensitive |
| ACGCGGATCGGCAACACTGCGAAG    | 0  | 9  | RDR2-sensitive |
| ACGCGGATGAACGCACAGTAACGG    | 0  | 17 | RDR2-sensitive |
| ACGCGGCAAGAACACGTACTIONCGGC | 0  | 12 | RDR2-sensitive |
| ACGCGGCACACTCACTCGTCGGCT    | 0  | 16 | RDR2-sensitive |
| ACGCGGCACTCACTCGTCGGCCTG    | 0  | 11 | RDR2-sensitive |
| ACGCGGCGACAATTTACTCGTCGG    | 0  | 9  | RDR2-sensitive |
| ACGCGGCTCTAGTCGGATGGAAGG    | 19 | 0  | RDR2-resistant |
| ACGCGGGACGGCGGACAGACACAA    | 0  | 11 | RDR2-sensitive |
| ACGCGGGACTGTACGACCGGAGGC    | 0  | 26 | RDR2-sensitive |
| ACGCGGGCTGCCACGTCATGAAGC    | 0  | 13 | RDR2-sensitive |
| ACGCGGTACTGTTGACTACGGGT     | 0  | 10 | RDR2-sensitive |
| ACGCGGTGCGATACTCACGACGGT    | 0  | 15 | RDR2-sensitive |
| ACGCGGTTGTCACGGTCTCGCAAG    | 0  | 9  | RDR2-sensitive |
| ACGCGTAGAGGGCGCTGTAGGGGA    | 0  | 9  | RDR2-sensitive |
| ACGCGTAGGGGACGCTGTAGGGGC    | 1  | 21 | RDR2-sensitive |
| ACGCGTAGGGGGCGCTGTAGGGGC    | 0  | 11 | RDR2-sensitive |
| ACGCGTCAGAGGCAGAACACGTCA    | 0  | 21 | RDR2-sensitive |
| ACGCGTCAGAGGCAGAACGGCAGA    | 0  | 38 | RDR2-sensitive |
| ACGCGTCAGATGCGCGATGGTCGG    | 1  | 14 | RDR2-sensitive |
| ACGCGTCGACACGGTGATGGCTGT    | 0  | 12 | RDR2-sensitive |
| ACGCGTCGGCTGGGCGGATAGCGT    | 0  | 20 | RDR2-sensitive |
| ACGCGTCTGAGACTGTGCGTGCGT    | 1  | 14 | RDR2-sensitive |
| ACGCGTCTGAGACTGTTTCGGTGCA   | 0  | 10 | RDR2-sensitive |
| ACGCGTCTGAGACTGTTTCGGTGTT   | 0  | 15 | RDR2-sensitive |
| ACGCGTCTTAGACTGTTTCGGTGTT   | 0  | 10 | RDR2-sensitive |
| ACGCGTGACGGCAGCAACCTCTCT    | 0  | 11 | RDR2-sensitive |
| ACGCGTGCGGGCTGTTTCGCGGCGT   | 0  | 56 | RDR2-sensitive |
| ACGCGTGCGGGTAGGAAGCGAGGA    | 0  | 19 | RDR2-sensitive |
| ACGCGTGCTCGCGTTTTGTCGTCGA   | 4  | 28 | RDR2-sensitive |
| ACGCGTGTCTGAAGCCGGACCCAA    | 0  | 11 | RDR2-sensitive |
| ACGCGTTGGACGGATCACGACGTC    | 51 | 9  | RDR2-resistant |
| ACGCTAAAGCTAGCGGATCTCGGG    | 0  | 13 | RDR2-sensitive |
| ACGCTAAGACTGTGTTACCCGCAT    | 0  | 21 | RDR2-sensitive |
| ACGCTACGGGCTTAAACGGATCGG    | 0  | 10 | RDR2-sensitive |
| ACGCTACGGGCTTAAACGGGCTAG    | 0  | 13 | RDR2-sensitive |
| ACGCTACTGGAGAACGTAGAGGAC    | 0  | 35 | RDR2-sensitive |
| ACGCTACTGGTGTCTCGGCTTCT     | 0  | 10 | RDR2-sensitive |
| ACGCTAGGATGAGCATCGACACAT    | 0  | 28 | RDR2-sensitive |
| ACGCTAGTGGGTTGTAATTCGGCT    | 0  | 11 | RDR2-sensitive |
| ACGCTATAAGTGCCGTCGGGATAA    | 0  | 9  | RDR2-sensitive |
| ACGCTATACTGCATGCACTCAGCC    | 0  | 38 | RDR2-sensitive |
| ACGCTATCGCAACGCACGGACACA    | 0  | 25 | RDR2-sensitive |
| ACGCTCACCGGAACTACGAGGACG    | 0  | 17 | RDR2-sensitive |
| ACGCTCACGTATGATCCTGTGCGCT   | 0  | 33 | RDR2-sensitive |
| ACGCTCATCTCCTGCGGATCTCGG    | 0  | 13 | RDR2-sensitive |
| ACGCTCCAGAGTTCTGACTGACGG    | 0  | 10 | RDR2-sensitive |
| ACGCTCCAGATTGAACGAAGGCAG    | 0  | 13 | RDR2-sensitive |
| ACGCTCGACGAACTGTACATCGGC    | 0  | 14 | RDR2-sensitive |

|                           |    |     |                |
|---------------------------|----|-----|----------------|
| ACGCTCGACGACTGGCAGAAGGAC  | 0  | 12  | RDR2-sensitive |
| ACGCTCGCAGAGCCCGGACGTCGT  | 0  | 13  | RDR2-sensitive |
| ACGCTCGGCAAACGTGTACATCGGC | 0  | 10  | RDR2-sensitive |
| ACGCTCGGCGAACTGTACATCGGC  | 26 | 337 | RDR2-sensitive |
| ACGCTCGGCGAACTGTATATCGGC  | 0  | 9   | RDR2-sensitive |
| ACGCTCGGTCACGCGCAGGATGAC  | 0  | 14  | RDR2-sensitive |
| ACGCTCGTTCGAGCCAAGCTGAGAC | 0  | 19  | RDR2-sensitive |
| ACGCTCTCGGGCAACCGTCTGTCGT | 0  | 16  | RDR2-sensitive |
| ACGCTCTGGATGCGGCAGAACCGT  | 2  | 37  | RDR2-sensitive |
| ACGCTCTGTACCATCATGGACCGT  | 0  | 10  | RDR2-sensitive |
| ACGCTGAGATGAGCATCAACACAT  | 0  | 11  | RDR2-sensitive |
| ACGCTGAGCGTGACTGCATGAGGA  | 0  | 9   | RDR2-sensitive |
| ACGCTGATGGAGGATAGACTGGTG  | 43 | 3   | RDR2-resistant |
| ACGCTGCTGGAGAGCATAGAAGAC  | 0  | 17  | RDR2-sensitive |
| ACGCTGCTGGAGAGCGTAGAGGAC  | 0  | 9   | RDR2-sensitive |
| ACGCTGCTGGAGGACGTAGAGGAC  | 0  | 11  | RDR2-sensitive |
| ACGCTGCTGTAATGGACAGGGGTA  | 0  | 38  | RDR2-sensitive |
| ACGCTGCTGTAGAGCGTAGACGAC  | 0  | 26  | RDR2-sensitive |
| ACGCTGGAACACTGGGACGAGCGC  | 0  | 15  | RDR2-sensitive |
| ACGCTGGAAGCTGTGAACCGTCAT  | 0  | 10  | RDR2-sensitive |
| ACGCTGGACGCAGGAAGCAGAACG  | 0  | 11  | RDR2-sensitive |
| ACGCTGGAGGCAGAACACGTCAGA  | 0  | 12  | RDR2-sensitive |
| ACGCTGGATGTAGCGCAACGGTAG  | 0  | 9   | RDR2-sensitive |
| ACGCTGGCAAGGAACACGGGCGCG  | 44 | 8   | RDR2-resistant |
| ACGCTGGCACAACCCGGACGTCGT  | 0  | 11  | RDR2-sensitive |
| ACGCTGGCACAACCTGAACGACGT  | 2  | 22  | RDR2-sensitive |
| ACGCTGGCAGATTAAGACTCGCAT  | 0  | 9   | RDR2-sensitive |
| ACGCTGGCCAGTGCGACGTGACAT  | 0  | 12  | RDR2-sensitive |
| ACGCTGGCCCAACCTGAACGACGT  | 1  | 22  | RDR2-sensitive |
| ACGCTGGGATGAGCATCGACACAT  | 0  | 80  | RDR2-sensitive |
| ACGCTGGGATGAGCATCGATACAT  | 0  | 30  | RDR2-sensitive |
| ACGCTGGTAAGACGGGAACACTAG  | 0  | 27  | RDR2-sensitive |
| ACGCTGGTGCTGTGAACACGTCGA  | 0  | 17  | RDR2-sensitive |
| ACGCTGTAGAAGAGGGTACCCCTT  | 0  | 10  | RDR2-sensitive |
| ACGCTGTAGGGGCACCGCTGCGGC  | 0  | 27  | RDR2-sensitive |
| ACGCTGTATATGAGGTTTTTCCGT  | 0  | 10  | RDR2-sensitive |
| ACGCTGTTCGTGCTGTTTCGTGCAT | 3  | 27  | RDR2-sensitive |
| ACGCTGTGGATGACGACCAGTTGA  | 0  | 13  | RDR2-sensitive |
| ACGCTGTTGTAGAATGTAGAGGAC  | 0  | 15  | RDR2-sensitive |
| ACGCTTAGTCCGGTGAACGTCTGC  | 0  | 10  | RDR2-sensitive |
| ACGCTTCGGACTGGCACGACACGG  | 0  | 68  | RDR2-sensitive |
| ACGCTTCGGGCTGGCACAACACGG  | 0  | 67  | RDR2-sensitive |
| ACGCTTCTGGAGCGAGGTCGTGGA  | 0  | 9   | RDR2-sensitive |
| ACGCTTGATGTGACCCGGACTAAA  | 0  | 28  | RDR2-sensitive |
| ACGCTTGATGTGACCCGGGCTAAA  | 0  | 19  | RDR2-sensitive |
| ACGCTTGATGTGACTCGGGCTAAA  | 0  | 10  | RDR2-sensitive |
| ACGCTTGATGTGATCCGGGCTAAA  | 0  | 19  | RDR2-sensitive |
| ACGGAAAAAAGCACGGCACGACAC  | 0  | 14  | RDR2-sensitive |
| ACGGAAAAGCAGCAGAGCACTCAC  | 0  | 9   | RDR2-sensitive |

|                          |    |    |                |
|--------------------------|----|----|----------------|
| ACGGAAATCTCGGGTCCGAGGACA | 0  | 9  | RDR2-sensitive |
| ACGGAACAAGAACCACAAGGGCAT | 0  | 35 | RDR2-sensitive |
| ACGGAACAGGAGAGGGCAGAACAG | 0  | 22 | RDR2-sensitive |
| ACGGAACGACGACGACACAGGAGG | 0  | 23 | RDR2-sensitive |
| ACGGAACGAGAACTACCCGGTAAA | 0  | 11 | RDR2-sensitive |
| ACGGAACGGGGACGGCAGAACGGC | 0  | 20 | RDR2-sensitive |
| ACGGAACGTGTGATGGTTAACAG  | 16 | 0  | RDR2-resistant |
| ACGGAAGTAGTCGGACACGGATAT | 0  | 15 | RDR2-sensitive |
| ACGGAAGTACGCGGGGACCCAT   | 0  | 37 | RDR2-sensitive |
| ACGGAAGCAAGAGGACGTCAGCAA | 5  | 41 | RDR2-sensitive |
| ACGGAAGCACGCGTTGGACGGATC | 84 | 7  | RDR2-resistant |
| ACGGAAGCAGACAGAGCTGGGCAT | 0  | 28 | RDR2-sensitive |
| ACGGAAGCAGGACAACGTCAGCAG | 1  | 17 | RDR2-sensitive |
| ACGGAAGCAGGACGACGTCAGCAG | 0  | 14 | RDR2-sensitive |
| ACGGAAGCAGGAGGACGTCAGCAA | 1  | 16 | RDR2-sensitive |
| ACGGAAGGGAATAAGACGGGCCAG | 0  | 30 | RDR2-sensitive |
| ACGGAAGTACGATGAGATGAGCAT | 0  | 33 | RDR2-sensitive |
| ACGGAAGTACGATGGGATGAGCAT | 1  | 17 | RDR2-sensitive |
| ACGGAAGTACGCTAAGATGAGCAT | 0  | 10 | RDR2-sensitive |
| ACGGAAGTACGCTGGGATGAGCAT | 0  | 36 | RDR2-sensitive |
| ACGGAATACGGCTCGAACTTCCAG | 0  | 12 | RDR2-sensitive |
| ACGGAATGAATCACCTGACGGTGC | 0  | 10 | RDR2-sensitive |
| ACGGAATGACAGAGCGGAATGGGA | 0  | 10 | RDR2-sensitive |
| ACGGAATGAGACAGCCTACCCCTT | 0  | 27 | RDR2-sensitive |
| ACGGAATGAGGCAGCCTACCCCTT | 0  | 14 | RDR2-sensitive |
| ACGGAATGTGGAGAGCCCAGACGC | 0  | 17 | RDR2-sensitive |
| ACGGACAATGGCGACGTGCAAACA | 0  | 10 | RDR2-sensitive |
| ACGGACACACCGCGGATACTTCTG | 0  | 9  | RDR2-sensitive |
| ACGGACACCTAACTAGATGGGCTT | 0  | 13 | RDR2-sensitive |
| ACGGACACGGTATGTTAGTGCCAT | 0  | 22 | RDR2-sensitive |
| ACGGACACGGTCATATATAGGGTT | 0  | 10 | RDR2-sensitive |
| ACGGACAGGATCCCTACAAGACGA | 0  | 10 | RDR2-sensitive |
| ACGGACAGGGGAGGGCAGAACAGA | 0  | 9  | RDR2-sensitive |
| ACGGACAGTACGAAGACGCTGCAC | 0  | 10 | RDR2-sensitive |
| ACGGACCAACGGACGGCCACAC   | 0  | 19 | RDR2-sensitive |
| ACGGACCACTATTTTCGTGGCCC  | 0  | 19 | RDR2-sensitive |
| ACGGACCAGACGCACGCGGGCCAC | 0  | 15 | RDR2-sensitive |
| ACGGACCAGGATATTACCGTGCAG | 0  | 9  | RDR2-sensitive |
| ACGGACCATCCGGCTACTAGGCGC | 0  | 32 | RDR2-sensitive |
| ACGGACCATCTGTAGGGAAATGGC | 0  | 9  | RDR2-sensitive |
| ACGGACCATGCCCGGCACTGGCAC | 0  | 12 | RDR2-sensitive |
| ACGGACCATTGGGGCGGCTGGGGC | 0  | 17 | RDR2-sensitive |
| ACGGACCCGATGAATGACGGCTAG | 0  | 12 | RDR2-sensitive |
| ACGGACCGAGATAGCACGGCTCGA | 0  | 15 | RDR2-sensitive |
| ACGGACCGAGCTGGCCAGGGACAG | 0  | 13 | RDR2-sensitive |
| ACGGACCGGGCTAGCGCGGCTTGA | 0  | 9  | RDR2-sensitive |
| ACGGACCGTCCAAGCCCTAGGCGC | 0  | 11 | RDR2-sensitive |
| ACGGACCGTCCATACCACAGGTGC | 0  | 11 | RDR2-sensitive |
| ACGGACCGTCCGACCATCAGACGC | 0  | 13 | RDR2-sensitive |



|                          |     |    |                |
|--------------------------|-----|----|----------------|
| ACGGACCGTCCGGCATTAGGCCAT | 0   | 9  | RDR2-sensitive |
| ACGGACCGTTAGACCCACAGGCGC | 0   | 12 | RDR2-sensitive |
| ACGGACCGTTCAAGCTACGCCCGC | 0   | 23 | RDR2-sensitive |
| ACGGACCTCAGTGGACAGAGGCAT | 0   | 17 | RDR2-sensitive |
| ACGGACCTGGATGTGCAGAGATAC | 0   | 41 | RDR2-sensitive |
| ACGGACGACGACTGATTGGGACGG | 0   | 10 | RDR2-sensitive |
| ACGGACGACGTAGATAGTGTGGCC | 0   | 11 | RDR2-sensitive |
| ACGGACGAGCAGGGCAAACCGAAG | 0   | 9  | RDR2-sensitive |
| ACGGACGATTACAGATGACGGGAC | 0   | 15 | RDR2-sensitive |
| ACGGACGCTGGACGCAGGAAGCAG | 1   | 59 | RDR2-sensitive |
| ACGGACGGATGCAGACGGATGCAG | 0   | 12 | RDR2-sensitive |
| ACGGACGGCGTATGGTCAAGGCA  | 0   | 14 | RDR2-sensitive |
| ACGGACGGTCCAGATTACCCGGAG | 0   | 9  | RDR2-sensitive |
| ACGGACGGTCTAGATCGCCGGGAG | 0   | 19 | RDR2-sensitive |
| ACGGACGGTGTAGATTAGCCGGAG | 0   | 67 | RDR2-sensitive |
| ACGGACGGTGTCCAACGACGTCAT | 0   | 10 | RDR2-sensitive |
| ACGGACGGTTATCATGACGGTCAT | 0   | 51 | RDR2-sensitive |
| ACGGACGTGGACGCCTACACTACT | 1   | 17 | RDR2-sensitive |
| ACGGACTAACAGGACGGGGTGAGG | 0   | 9  | RDR2-sensitive |
| ACGGACTGATCTATTAGAAGGGCC | 186 | 3  | RDR2-resistant |
| ACGGACTGGACAGGTGCGCCGTCT | 0   | 9  | RDR2-sensitive |
| ACGGACTGTGAACGCCTACGGTAC | 0   | 59 | RDR2-sensitive |
| ACGGACTTAGACGGTACCCTATTT | 19  | 1  | RDR2-resistant |
| ACGGACTTATTTCCGGCGGTCCGA | 0   | 12 | RDR2-sensitive |
| ACGGAGACGAGCCCATAAGGACGA | 0   | 10 | RDR2-sensitive |
| ACGGAGAGACGGCTCTAAGATTAT | 0   | 18 | RDR2-sensitive |
| ACGGAGAGACGGCTCTAAGATTTT | 2   | 47 | RDR2-sensitive |
| ACGGAGCCGCTCTGTTCTGTGTTT | 0   | 20 | RDR2-sensitive |
| ACGGAGCCGGATACGGAGACTGCT | 0   | 23 | RDR2-sensitive |
| ACGGAGCGAGGAGACAGACACCAT | 0   | 16 | RDR2-sensitive |
| ACGGAGCGGCAGAACACGATTGTG | 0   | 11 | RDR2-sensitive |
| ACGGAGCTCTGACATGACGACGTC | 0   | 35 | RDR2-sensitive |
| ACGGAGGATAGAGGAGTATAGCAT | 0   | 17 | RDR2-sensitive |
| ACGGAGGATATGATGTGTAGTCGG | 177 | 0  | RDR2-resistant |
| ACGGAGGATTGGGAGTAGAAGCGA | 0   | 30 | RDR2-sensitive |
| ACGGAGGCAGAACAGCCGTTGGCA | 0   | 11 | RDR2-sensitive |
| ACGGAGGCAGAACGCGGCTCGGGT | 0   | 12 | RDR2-sensitive |
| ACGGAGGGCTGGTTTGGACGTCAT | 0   | 11 | RDR2-sensitive |
| ACGGAGGTGTGGGCATAAGAGGAA | 0   | 18 | RDR2-sensitive |
| ACGGAGTAGAGCAGAACGGTTCCT | 1   | 24 | RDR2-sensitive |
| ACGGAGTCCGAACGGGTTGACGGT | 0   | 9  | RDR2-sensitive |
| ACGGAGTCTGCTGGAACGCACGGT | 0   | 15 | RDR2-sensitive |
| ACGGAGTCTGCTGGAGCGCGCAAC | 1   | 13 | RDR2-sensitive |
| ACGGAGTGACGCAAGCAAGGACCC | 0   | 10 | RDR2-sensitive |
| ACGGAGTGGTAGTGGAGGGGATTT | 19  | 0  | RDR2-resistant |
| ACGGAGTTCTCCTGTGTGTTGGT  | 0   | 20 | RDR2-sensitive |
| ACGGAGTTGGGAATGGGAATGGCA | 0   | 12 | RDR2-sensitive |
| ACGGAGTTTTTAGATCTACGGTAT | 0   | 27 | RDR2-sensitive |
| ACGGATAACCCGCGGGTAGAAGGT | 0   | 9  | RDR2-sensitive |

|                           |    |     |                |
|---------------------------|----|-----|----------------|
| ACGGATACAGGACGGGACCGGGTA  | 0  | 9   | RDR2-sensitive |
| ACGGATACGAGTATTTTTTTGACA  | 2  | 15  | RDR2-sensitive |
| ACGGATACGGAGAGGAGAGAGAAT  | 0  | 21  | RDR2-sensitive |
| ACGGATACGGATACAGGGACCGGA  | 0  | 31  | RDR2-sensitive |
| ACGGATACGGATACGGATAGTCTG  | 0  | 12  | RDR2-sensitive |
| ACGGATACGGATAGTCTGTTCGGA  | 0  | 12  | RDR2-sensitive |
| ACGGATACGGGTTTGGGATAGCAA  | 0  | 10  | RDR2-sensitive |
| ACGGATACTTTTGGGGCACCTGGC  | 22 | 0   | RDR2-resistant |
| ACGGATAGGGGCATTTCGAGGCGGA | 87 | 8   | RDR2-resistant |
| ACGGATAGTTAGAAACAGGACGGA  | 0  | 26  | RDR2-sensitive |
| ACGGATAGTTAGAAACGGGACGGA  | 1  | 76  | RDR2-sensitive |
| ACGGATAGTTAGAAACGGGGCGGA  | 0  | 13  | RDR2-sensitive |
| ACGGATATAGAGGATGTATATAGA  | 0  | 12  | RDR2-sensitive |
| ACGGATATGACTCGGCGAGCCCGG  | 0  | 14  | RDR2-sensitive |
| ACGGATCACTACAGTATGTGGCAC  | 0  | 11  | RDR2-sensitive |
| ACGGATCAGAGCAGACCTTGGCGT  | 0  | 12  | RDR2-sensitive |
| ACGGATCAGATGATTTGCTTGAC   | 0  | 9   | RDR2-sensitive |
| ACGGATCAGATGGTTTGCTTGAC   | 0  | 20  | RDR2-sensitive |
| ACGGATCATACCCGGATCGAGCTC  | 0  | 27  | RDR2-sensitive |
| ACGGATCTAGACTGCCAAGACCAT  | 0  | 9   | RDR2-sensitive |
| ACGGATGACCACATTGAAGAGCGG  | 0  | 10  | RDR2-sensitive |
| ACGGATGACGTGGTCTAGCTCGGC  | 1  | 15  | RDR2-sensitive |
| ACGGATGAGCTCAACGACGTCATT  | 1  | 18  | RDR2-sensitive |
| ACGGATGCTGCAGGAGGGTTCATC  | 0  | 9   | RDR2-sensitive |
| ACGGATGTGAAGGCCTACACTACT  | 0  | 19  | RDR2-sensitive |
| ACGGATGTGGATTGGGAGACCGTT  | 0  | 10  | RDR2-sensitive |
| ACGGATTAGGACCATGCCGGCCCCG | 0  | 14  | RDR2-sensitive |
| ACGGATTCAGAATCGGATACGGAT  | 0  | 14  | RDR2-sensitive |
| ACGGATTCAGGATCGGATACGGAT  | 0  | 15  | RDR2-sensitive |
| ACGGATTGAGATCGGATACGGAT   | 0  | 16  | RDR2-sensitive |
| ACGGATTGAGATCGGATACGGAT   | 0  | 11  | RDR2-sensitive |
| ACGGATTGAGATCGGATACGGAT   | 0  | 137 | RDR2-sensitive |
| ACGGATTGAATACCTGGAACGGTT  | 0  | 10  | RDR2-sensitive |
| ACGGATTGAGTAGTAGCAGCCGAC  | 0  | 89  | RDR2-sensitive |
| ACGGATTGTTGTTACGGTGCTCAC  | 0  | 18  | RDR2-sensitive |
| ACGGATTTCTTTTATAGACGTCT   | 0  | 24  | RDR2-sensitive |
| ACGGATTTGGCACGGCATGAACTC  | 1  | 35  | RDR2-sensitive |
| ACGGATTTTAGCCCAGGCCCGGTT  | 1  | 15  | RDR2-sensitive |
| ACGGATTTTCTTTTATAGACGTCT  | 1  | 28  | RDR2-sensitive |
| ACGGATTTTTGTTTCGTTGCTCGA  | 0  | 12  | RDR2-sensitive |
| ACGGCAAATAAGGGGGAGGACAG   | 0  | 10  | RDR2-sensitive |
| ACGGCAAACGGTAACGGCTGACGG  | 0  | 9   | RDR2-sensitive |
| ACGGCAAAGAAGCTGATTCCGGTA  | 0  | 12  | RDR2-sensitive |
| ACGGCAAAGGAGCTGATTCCGGTA  | 2  | 77  | RDR2-sensitive |
| ACGGCAAAGGAGCTGTGTCCGGTA  | 0  | 9   | RDR2-sensitive |
| ACGGCAACCTATTTAGACGGACAT  | 0  | 10  | RDR2-sensitive |
| ACGGCAACGGTTCGGATCCAACGGT | 2  | 23  | RDR2-sensitive |
| ACGGCAAGAACTGAGGAGGGGCAC  | 0  | 9   | RDR2-sensitive |
| ACGGCACATGACAATACCTGGCTG  | 0  | 13  | RDR2-sensitive |

|                           |     |     |                |
|---------------------------|-----|-----|----------------|
| ACGGCACCTGAACGAGGCAGACCA  | 0   | 14  | RDR2-sensitive |
| ACGGCACCTGTAGTCTGTAGGCAC  | 0   | 22  | RDR2-sensitive |
| ACGGCACGAAAAAGAACGGTCCAG  | 0   | 19  | RDR2-sensitive |
| ACGGCACGAAAAAGCACGGTCCAG  | 0   | 20  | RDR2-sensitive |
| ACGGCACGACACGAGTTGAACCGG  | 0   | 15  | RDR2-sensitive |
| ACGGCACGACACTGGCACTAGCAC  | 1   | 19  | RDR2-sensitive |
| ACGGCACGACAGGACACGGCACGG  | 0   | 12  | RDR2-sensitive |
| ACGGCACGACAGGCCCGAGCACGC  | 0   | 9   | RDR2-sensitive |
| ACGGCACGACTGTCCGCATGGCCT  | 0   | 21  | RDR2-sensitive |
| ACGGCACGATTAGCTCCTAGGCAC  | 0   | 12  | RDR2-sensitive |
| ACGGCACGATTAGGGTTTAGGCAC  | 0   | 14  | RDR2-sensitive |
| ACGGCACGCTTCGCTAGCCGGGCC  | 0   | 33  | RDR2-sensitive |
| ACGGCACGGCACAGCTGAGCGGAG  | 0   | 9   | RDR2-sensitive |
| ACGGCACGGCACGGTTAAGCACTG  | 0   | 22  | RDR2-sensitive |
| ACGGCACGGCACTGGCACTAGCAC  | 1   | 21  | RDR2-sensitive |
| ACGGCACGGCTAAGCACTGGTAGT  | 0   | 9   | RDR2-sensitive |
| ACGGCACGGCTAAGCAGGCTTAGT  | 0   | 9   | RDR2-sensitive |
| ACGGCACGGCTATCGGATCGGGCT  | 0   | 12  | RDR2-sensitive |
| ACGGCACGGGTAAGGCACGATCGT  | 0   | 14  | RDR2-sensitive |
| ACGGCACGGTACGGATTAAGCGG   | 0   | 13  | RDR2-sensitive |
| ACGGCACGGTAGAATAAGCGGGCG  | 0   | 9   | RDR2-sensitive |
| ACGGCACGTCCATGTCTAGATCGT  | 1   | 56  | RDR2-sensitive |
| ACGGCACGTGCACCGGGTCCGGGCT | 1   | 44  | RDR2-sensitive |
| ACGGCACGTTACGCGGGCTGGGCC  | 0   | 12  | RDR2-sensitive |
| ACGGCACTAAGCACTATTAGGCAC  | 4   | 42  | RDR2-sensitive |
| ACGGCACTAAGCACTATTAGGCAT  | 1   | 73  | RDR2-sensitive |
| ACGGCACTACACAGGCTCATCCGT  | 0   | 43  | RDR2-sensitive |
| ACGGCACTCTAGTTGAAGAAGGTT  | 580 | 120 | RDR2-resistant |
| ACGGCACTGACGCACGGTACTGAC  | 0   | 21  | RDR2-sensitive |
| ACGGCACTGCTCGACGCGTTCGTC  | 129 | 27  | RDR2-resistant |
| ACGGCACTGGCACTAGCACGACCA  | 0   | 17  | RDR2-sensitive |
| ACGGCACTTGCTGGCACTATACCA  | 301 | 11  | RDR2-resistant |
| ACGGCAGAACACACTGATGGCAGA  | 0   | 12  | RDR2-sensitive |
| ACGGCAGAACAGCAGACTACTCTT  | 0   | 39  | RDR2-sensitive |
| ACGGCAGAACGACAGACTACTCTT  | 0   | 15  | RDR2-sensitive |
| ACGGCAGAACGGCAGAACGCGTCA  | 0   | 26  | RDR2-sensitive |
| ACGGCAGAACGGCAGAACGGCAGA  | 0   | 57  | RDR2-sensitive |
| ACGGCAGAACGGCAGACTACCCTT  | 1   | 28  | RDR2-sensitive |
| ACGGCAGAACGGCAGACTACTCTT  | 0   | 149 | RDR2-sensitive |
| ACGGCAGGGTAGAGAAGCGACGGT  | 0   | 22  | RDR2-sensitive |
| ACGGCAGTGTCTTATCTCCGACGG  | 0   | 16  | RDR2-sensitive |
| ACGGCATAGAGAACGTTTCGTA    | 0   | 11  | RDR2-sensitive |
| ACGGCATCGTAGACAGCCGTCGGA  | 1   | 19  | RDR2-sensitive |
| ACGGCATGGTTAGGACACGGCCCCG | 0   | 10  | RDR2-sensitive |
| ACGGCATAACTTATCTCCGACGG   | 0   | 18  | RDR2-sensitive |
| ACGGCATTGCTACGTACCGTCGGC  | 33  | 5   | RDR2-resistant |
| ACGGCATTGTTGGGCTTTTTGGACC | 0   | 9   | RDR2-sensitive |
| ACGGCCAAAACCGTCGGACATAAG  | 0   | 16  | RDR2-sensitive |
| ACGGCCAAAACCGTCGGACATTAG  | 0   | 14  | RDR2-sensitive |

|                           |     |     |                |
|---------------------------|-----|-----|----------------|
| ACGGCCAAAGCCGTCGGACATAAG  | 0   | 19  | RDR2-sensitive |
| ACGGCCAGAGTAGAAGCACGACAG  | 0   | 27  | RDR2-sensitive |
| ACGGCCAGCCGTCGGAAATAAGAC  | 0   | 15  | RDR2-sensitive |
| ACGGCCAGCTAGCAAAGATGAGTG  | 0   | 10  | RDR2-sensitive |
| ACGGCCAGGCAACGTTTCGGACGT  | 0   | 14  | RDR2-sensitive |
| ACGGCCAGGTGTCGGACGGTCCGC  | 0   | 9   | RDR2-sensitive |
| ACGGCCAGTCTGACAGCCGTCGGC  | 0   | 11  | RDR2-sensitive |
| ACGGCCCCATAGGAAACCGTCGGA  | 0   | 10  | RDR2-sensitive |
| ACGGCCCCATAGGCAACCGTCGGA  | 0   | 34  | RDR2-sensitive |
| ACGGCCCCGTAGGCAACCGTCGGA  | 1   | 32  | RDR2-sensitive |
| ACGGCCCCGTAGTGCCTGGGCACGG | 0   | 79  | RDR2-sensitive |
| ACGGCCCCGTCAGCCTGCTAGTCGT | 1   | 21  | RDR2-sensitive |
| ACGGCCCCGTCAGCCTGGTAGTCGT | 0   | 10  | RDR2-sensitive |
| ACGGCCCCGTGAGCCTGTTAGTCGT | 14  | 119 | RDR2-sensitive |
| ACGGCCCCGTGAGTCTGTTAGTCGT | 8   | 228 | RDR2-sensitive |
| ACGGCCCTGGCTCTTTGATGGCTC  | 0   | 14  | RDR2-sensitive |
| ACGGCCTAAGTTGGACGCGTGCGT  | 0   | 13  | RDR2-sensitive |
| ACGGCCTCCTACAGGACCGTCGGA  | 3   | 16  | RDR2-sensitive |
| ACGGCCTCGATGAACTGCCGGCGC  | 1   | 19  | RDR2-sensitive |
| ACGGCCTCGTACAGATCCGTCGGA  | 0   | 11  | RDR2-sensitive |
| ACGGCCTCGTACCGAGCCGTCGGA  | 1   | 12  | RDR2-sensitive |
| ACGGCCTCGTACGTAGCCGTCGGA  | 0   | 14  | RDR2-sensitive |
| ACGGCCTGGTGACGTGGCTGGCGC  | 3   | 17  | RDR2-sensitive |
| ACGGCCTGTCAGCCTGTTAGTCGT  | 0   | 17  | RDR2-sensitive |
| ACGGCCTTCAGCGACCTACGGTTG  | 1   | 16  | RDR2-sensitive |
| ACGGCCTTGTAGAAAGCCGTCGGA  | 0   | 10  | RDR2-sensitive |
| ACGGCCTTGTAGGAAGCCGTCGGA  | 0   | 16  | RDR2-sensitive |
| ACGGCCTTTAGCGACCTACGGTTG  | 0   | 31  | RDR2-sensitive |
| ACGGCGAACCGBAAGCAGCTCCAG  | 0   | 15  | RDR2-sensitive |
| ACGGCGACTGGTAAAGGAGACGAC  | 0   | 11  | RDR2-sensitive |
| ACGGCGCTTAACTCGGACGTCCGT  | 0   | 13  | RDR2-sensitive |
| ACGGCGTAAGTACATTGGTGACGG  | 0   | 9   | RDR2-sensitive |
| ACGGCGTAGATTCATGGAAGGCAG  | 0   | 14  | RDR2-sensitive |
| ACGGCGTCGTTACCGAGAGCAGAA  | 0   | 12  | RDR2-sensitive |
| ACGGCGTCTGTACACGGGAACGGT  | 100 | 0   | RDR2-resistant |
| ACGGCTAACTCGGTCTTCGACGGT  | 0   | 12  | RDR2-sensitive |
| ACGGCTACCGTCGGAACAGTCGGA  | 0   | 17  | RDR2-sensitive |
| ACGGCTACCTACAAGACCGTCGGA  | 0   | 10  | RDR2-sensitive |
| ACGGCTACCTGCGCCTAGGGCTGA  | 2   | 20  | RDR2-sensitive |
| ACGGCTACCTTCGCCTAGGGCTGA  | 3   | 32  | RDR2-sensitive |
| ACGGCTACGATCGCAGAACAGTAA  | 0   | 15  | RDR2-sensitive |
| ACGGCTACGCTGACAGCCGTCGGA  | 0   | 9   | RDR2-sensitive |
| ACGGCTACGGACCGGGCTCTCGGA  | 1   | 14  | RDR2-sensitive |
| ACGGCTACTGTAGCCCACGGGCCG  | 0   | 16  | RDR2-sensitive |
| ACGGCTACTTGCGCCTAGGGCTGA  | 0   | 25  | RDR2-sensitive |
| ACGGCTAGCAGACTGACGGACCAT  | 0   | 10  | RDR2-sensitive |
| ACGGCTAGGAACCAGACGGTCTGT  | 0   | 13  | RDR2-sensitive |
| ACGGCTAGGCACGGTAGAAGATCC  | 0   | 11  | RDR2-sensitive |
| ACGGCTATAGCTGAAGATGCTCAA  | 0   | 13  | RDR2-sensitive |

|                           |    |     |                |
|---------------------------|----|-----|----------------|
| ACGGCTATCAGTCGGTCGTCTGAC  | 0  | 9   | RDR2-sensitive |
| ACGGCTCAACATCCTGACGGACAG  | 0  | 24  | RDR2-sensitive |
| ACGGCTCCTCCGCGAACGGCTCAA  | 1  | 12  | RDR2-sensitive |
| ACGGCTCGTGAGCCTGTTAGTCGT  | 0  | 16  | RDR2-sensitive |
| ACGGCTCTAGTGAAACACGTCATC  | 0  | 9   | RDR2-sensitive |
| ACGGCTCTGAATCTGCAACGGTCG  | 1  | 18  | RDR2-sensitive |
| ACGGCTCTGGCTCCTTGATGGCTC  | 0  | 34  | RDR2-sensitive |
| ACGGCTCTGGCTCTTTGATGGCTC  | 2  | 111 | RDR2-sensitive |
| ACGGCTCTGTCTCTTTGATGGCTC  | 1  | 32  | RDR2-sensitive |
| ACGGCTGAGATCGCAGAACGGCAA  | 0  | 27  | RDR2-sensitive |
| ACGGCTGAGATCGCAGAAATGACAG | 0  | 16  | RDR2-sensitive |
| ACGGCTGAGCACGTGGGCCGGCAC  | 1  | 25  | RDR2-sensitive |
| ACGGCTGAGCACGTGGGCTGGCAC  | 0  | 17  | RDR2-sensitive |
| ACGGCTGCACGGTACTCCAAGTAC  | 0  | 14  | RDR2-sensitive |
| ACGGCTGCCTAGGAGACCGTCGGA  | 0  | 56  | RDR2-sensitive |
| ACGGCTGCGTGTACCCGTCGGAAA  | 0  | 11  | RDR2-sensitive |
| ACGGCTGGAGTAGAGACCGGTGTG  | 0  | 10  | RDR2-sensitive |
| ACGGCTGGCACTCGGCAAAGAGGC  | 2  | 17  | RDR2-sensitive |
| ACGGCTGGCAGACTGACCGTCGGA  | 0  | 16  | RDR2-sensitive |
| ACGGCTGGGCGGCAAAGGATTCGC  | 0  | 9   | RDR2-sensitive |
| ACGGCTGGTCCAAGCTCGACACGG  | 0  | 16  | RDR2-sensitive |
| ACGGCTTACTTAGAGACCGTCGGA  | 0  | 14  | RDR2-sensitive |
| ACGGCTTAGATTCACCGAAGGCAG  | 0  | 10  | RDR2-sensitive |
| ACGGCTTGTCTGACAGCAGTCGGA  | 0  | 17  | RDR2-sensitive |
| ACGGCTTGTCTGATAGTCGTCGGT  | 0  | 11  | RDR2-sensitive |
| ACGGCTTTGTAGGAAATTGTCGGC  | 0  | 11  | RDR2-sensitive |
| ACGGCTTTTTGTAGCTTCGTCGTG  | 2  | 18  | RDR2-sensitive |
| ACGGGAACGAGGAACACGGTACGT  | 0  | 20  | RDR2-sensitive |
| ACGGGAACGAGGAACGCGGTACGT  | 0  | 9   | RDR2-sensitive |
| ACGGGAATGTACCAACTGACGGTG  | 0  | 9   | RDR2-sensitive |
| ACGGGACAAC TAGGATAGGGACGT | 0  | 17  | RDR2-sensitive |
| ACGGGACCCGCCTTAAGCCGTCGG  | 0  | 15  | RDR2-sensitive |
| ACGGGACCTTAGAATGCTTGGCAA  | 0  | 18  | RDR2-sensitive |
| ACGGGACGACTGTGAAGACGACGA  | 1  | 104 | RDR2-sensitive |
| ACGGGACGGATACATGTACTACCC  | 0  | 12  | RDR2-sensitive |
| ACGGGACGGATACGGAACAGCCAA  | 0  | 13  | RDR2-sensitive |
| ACGGGACGGATACGGATACAGAGA  | 0  | 10  | RDR2-sensitive |
| ACGGGACGGATACGGATACAGGGA  | 0  | 9   | RDR2-sensitive |
| ACGGGACGGTGAATGCTTCTCCAT  | 0  | 64  | RDR2-sensitive |
| ACGGGACTAACGGGCACATAACAA  | 0  | 13  | RDR2-sensitive |
| ACGGGACTCAGCTGAGGCAGCCAT  | 0  | 9   | RDR2-sensitive |
| ACGGGACTGCTGAAGATTAGGGTT  | 0  | 15  | RDR2-sensitive |
| ACGGGACTGTAAACGTAGAGAGGC  | 0  | 14  | RDR2-sensitive |
| ACGGGACTGTCCGGTGGACTAGGC  | 0  | 12  | RDR2-sensitive |
| ACGGGAGGGAAGGGAGCGGATCTG  | 0  | 11  | RDR2-sensitive |
| ACGGGAGGGAGGACCATCACTACG  | 43 | 4   | RDR2-resistant |
| ACGGGAGTACACTGGGATGAGCAC  | 0  | 14  | RDR2-sensitive |
| ACGGGAGTACACTGGGATGAGCAT  | 0  | 19  | RDR2-sensitive |
| ACGGGAGTACGCTAGGATGAGCAT  | 1  | 40  | RDR2-sensitive |

|                           |     |    |                |
|---------------------------|-----|----|----------------|
| ACGGGAGTACGCTGAGATGAGCAT  | 0   | 12 | RDR2-sensitive |
| ACGGGAGTACGCTGGGATGAGCAT  | 2   | 27 | RDR2-sensitive |
| ACGGGATGGGACGGGACGATCCAT  | 0   | 10 | RDR2-sensitive |
| ACGGGATTTTTCGGACTTCGGCCG  | 3   | 68 | RDR2-sensitive |
| ACGGGCAAACCTGAGCGCGTGACGG | 0   | 11 | RDR2-sensitive |
| ACGGGCACACAGAGCGGTAGGGGG  | 43  | 1  | RDR2-resistant |
| ACGGGCACACAGAGCGGTAGGGGT  | 201 | 0  | RDR2-resistant |
| ACGGGCAGTGGAAAGATGATGTGCG | 0   | 30 | RDR2-sensitive |
| ACGGGCATAGTGTCTGGGCTAGCAC | 0   | 10 | RDR2-sensitive |
| ACGGGCATCAACTCTGCAGGTAGA  | 0   | 18 | RDR2-sensitive |
| ACGGGCATGCGTACTGTCGTGGAC  | 0   | 20 | RDR2-sensitive |
| ACGGGCCAGAATCAACACGGTCGA  | 0   | 12 | RDR2-sensitive |
| ACGGGCCATGAGCAGCAGGGTCGA  | 0   | 12 | RDR2-sensitive |
| ACGGGCCCGGCACGAACTGATGGG  | 0   | 10 | RDR2-sensitive |
| ACGGGCCCTTAGGGATTGTTCCGGT | 0   | 12 | RDR2-sensitive |
| ACGGGCCGACAGCATGGACGAGCA  | 1   | 52 | RDR2-sensitive |
| ACGGGCCGAGCTGACCAGGGACAG  | 0   | 14 | RDR2-sensitive |
| ACGGGCCGATCCGATACTAGGCAT  | 0   | 12 | RDR2-sensitive |
| ACGGGCCTTGCCTGGGTCCGGCA   | 0   | 16 | RDR2-sensitive |
| ACGGGCGACGGTAGAAGAGGAAGA  | 0   | 9  | RDR2-sensitive |
| ACGGGCGCATGAACTACGGCGAGC  | 0   | 9  | RDR2-sensitive |
| ACGGGCGCCGGCAGGCAACTTCTC  | 0   | 9  | RDR2-sensitive |
| ACGGGCGGCCCGCACTGTTTGGAC  | 0   | 31 | RDR2-sensitive |
| ACGGGCGGCCCGTACTGTTTGGAC  | 0   | 9  | RDR2-sensitive |
| ACGGGCGGGCAGGCGTATGGAGGC  | 0   | 12 | RDR2-sensitive |
| ACGGGCGTTTCTTAGAACAGTCGG  | 1   | 28 | RDR2-sensitive |
| ACGGGCTAAACGGGCTAAACGGGC  | 0   | 12 | RDR2-sensitive |
| ACGGGCTAGACGCACGCGGGCCAC  | 1   | 13 | RDR2-sensitive |
| ACGGGCTAGATGCACACGGGCCAC  | 0   | 13 | RDR2-sensitive |
| ACGGGCTAGATGCACGCGGGCCAC  | 0   | 80 | RDR2-sensitive |
| ACGGGCTAGATGCATGCGGGCCAC  | 0   | 10 | RDR2-sensitive |
| ACGGGCTAGGTTTACAACGTGCCG  | 0   | 15 | RDR2-sensitive |
| ACGGGCTAGTTTGGTGTGTGGCGT  | 0   | 9  | RDR2-sensitive |
| ACGGGCTATATGGGCTAAACGGGC  | 1   | 42 | RDR2-sensitive |
| ACGGGCTCACTGCTGGACCGGTCC  | 0   | 14 | RDR2-sensitive |
| ACGGGCTCGACAACACGCGAAGCG  | 0   | 14 | RDR2-sensitive |
| ACGGGCTCGACGAGATGAAGCCGG  | 1   | 40 | RDR2-sensitive |
| ACGGGCTGAGCTGGCATGACCCGA  | 0   | 18 | RDR2-sensitive |
| ACGGGCTGCCGGCGTCCTTTACGG  | 0   | 10 | RDR2-sensitive |
| ACGGGCTGCCGGTTTGATGGCCAT  | 0   | 9  | RDR2-sensitive |
| ACGGGCTGCTGGACCAGCGTCGCA  | 0   | 11 | RDR2-sensitive |
| ACGGGCTTAGAGGTAACGGGCCG   | 0   | 33 | RDR2-sensitive |
| ACGGGCTTCGTGCCGGGCTCACGG  | 0   | 30 | RDR2-sensitive |
| ACGGGCTTCGTGCCGGGCTCGCGG  | 2   | 39 | RDR2-sensitive |
| ACGGGCTTCGTGTCCGGGCTCGCGG | 0   | 10 | RDR2-sensitive |
| ACGGGGAATCTGGCGGAAGAGCGA  | 0   | 9  | RDR2-sensitive |
| ACGGGGAATTAGGACGAGACGCGG  | 0   | 9  | RDR2-sensitive |
| ACGGGGACATGTAATATCACGTA   | 0   | 10 | RDR2-sensitive |
| ACGGGGACGGAGACAGAGAAGCAT  | 0   | 9  | RDR2-sensitive |

|                           |    |     |                |
|---------------------------|----|-----|----------------|
| ACGGGGACGGGGATGGAGAAGCAT  | 0  | 18  | RDR2-sensitive |
| ACGGGGACTGTTGGCAGACCGGTT  | 0  | 12  | RDR2-sensitive |
| ACGGGGCATTGTAAGTGGCAGAGT  | 61 | 9   | RDR2-resistant |
| ACGGGGCGCTGTGGTCCATATGGC  | 0  | 18  | RDR2-sensitive |
| ACGGGGGCTTTGGCAGAACTGCAC  | 0  | 29  | RDR2-sensitive |
| ACGGGTAATAGTGGAGGATGTCCT  | 0  | 11  | RDR2-sensitive |
| ACGGGTACGGATTTGGAACGGCAA  | 0  | 11  | RDR2-sensitive |
| ACGGGTACGGGTTTGGGACGGCAA  | 0  | 78  | RDR2-sensitive |
| ACGGGTACGGGTTTGGGACGGTAA  | 0  | 16  | RDR2-sensitive |
| ACGGGTACGGGTTTGGGATAGCAA  | 0  | 9   | RDR2-sensitive |
| ACGGGTACGGGTTTGGGATGGCAA  | 0  | 9   | RDR2-sensitive |
| ACGGGTAGGATACGGAATCACAAA  | 0  | 23  | RDR2-sensitive |
| ACGGGTAGGATACGGAATCACTAA  | 0  | 78  | RDR2-sensitive |
| ACGGGTAGGATACGGAATCGCTAA  | 0  | 16  | RDR2-sensitive |
| ACGGGTAGGATACGTGATAGCTAA  | 0  | 16  | RDR2-sensitive |
| ACGGGTAGGATAGGTGATAGCTAA  | 0  | 13  | RDR2-sensitive |
| ACGGGTAGTTAAGAATCGGGACGG  | 0  | 11  | RDR2-sensitive |
| ACGGGTAGTTAAGATTCGGGACGG  | 1  | 12  | RDR2-sensitive |
| ACGGGTATTAGAACGTTCCGGCCT  | 0  | 10  | RDR2-sensitive |
| ACGGGTATTAGAACGTTCCGGCTT  | 1  | 12  | RDR2-sensitive |
| ACGGGTCATGCTGTGGTTCGGGTC  | 0  | 9   | RDR2-sensitive |
| ACGGGTCCCTGTAGCGAGTCCGGT  | 0  | 11  | RDR2-sensitive |
| ACGGGTCCCTGTAGACGGCCAATGC | 0  | 19  | RDR2-sensitive |
| ACGGGTGCATAACATGGACGAGCA  | 0  | 11  | RDR2-sensitive |
| ACGGGTGCATCGGTATACGCGTAT  | 0  | 13  | RDR2-sensitive |
| ACGGGTGCGATACGGATACTACCC  | 0  | 47  | RDR2-sensitive |
| ACGGGTGCGATACGGATAGTACCC  | 0  | 18  | RDR2-sensitive |
| ACGGGTGCGTCTGAAACACGGCTC  | 2  | 63  | RDR2-sensitive |
| ACGGGTGCGTGCGAGACAGGCGGA  | 0  | 16  | RDR2-sensitive |
| ACGGGTCTCTGTGGAGAACGGGAT  | 0  | 40  | RDR2-sensitive |
| ACGGGTCTGAGTCCGGCACGACAC  | 0  | 43  | RDR2-sensitive |
| ACGGGTCTGCGGCAATGTATCATG  | 0  | 9   | RDR2-sensitive |
| ACGGGTCTGTATGAGCACGGCCAA  | 0  | 9   | RDR2-sensitive |
| ACGGGTGACGGATATGGATAGCAT  | 0  | 15  | RDR2-sensitive |
| ACGGGTGCTCGGCTGAGACAGCGT  | 0  | 10  | RDR2-sensitive |
| ACGGGTGGTAGAACGCGGCAGTGT  | 0  | 14  | RDR2-sensitive |
| ACGGGTGTAGAGTGTAGACGCCTA  | 1  | 113 | RDR2-sensitive |
| ACGGGTTACTGTTATTGATCGGCT  | 72 | 10  | RDR2-resistant |
| ACGGGTTGACGACTCGACGGTAA   | 0  | 11  | RDR2-sensitive |
| ACGGGTTGGTCTGTTACGGTCATG  | 0  | 19  | RDR2-sensitive |
| ACGGGTTTTGGATATCCGTCGGAT  | 0  | 9   | RDR2-sensitive |
| ACGGTACACAATCTGATCTGACGG  | 40 | 0   | RDR2-resistant |
| ACGGTACCCTAAGAACCGTCGGAA  | 0  | 10  | RDR2-sensitive |
| ACGGTACCCTAGGAACCGTCGGAA  | 0  | 11  | RDR2-sensitive |
| ACGGTACCTGTACGTTGCAACGGC  | 0  | 10  | RDR2-sensitive |
| ACGGTACGAACAAGCGGGCGGGCT  | 0  | 14  | RDR2-sensitive |
| ACGGTACGAATAAGCGGGCGGGCT  | 0  | 24  | RDR2-sensitive |
| ACGGTACGACTGTAAACGGCCCA   | 1  | 24  | RDR2-sensitive |
| ACGGTACTATAGTCATGTCGTGCT  | 0  | 15  | RDR2-sensitive |

|                           |    |     |                |
|---------------------------|----|-----|----------------|
| ACGGTACTGACGCAAAGAATGGCT  | 0  | 11  | RDR2-sensitive |
| ACGGTAGAATAAACGGGCGGGCTT  | 0  | 74  | RDR2-sensitive |
| ACGGTAGAATAAGCGGACGGACTT  | 0  | 64  | RDR2-sensitive |
| ACGGTAGAATAAGCGGGCAGGTTT  | 0  | 9   | RDR2-sensitive |
| ACGGTAGAATAAGCGGGCGGACTT  | 0  | 37  | RDR2-sensitive |
| ACGGTAGAATAAGCGGGCGGGCTA  | 0  | 40  | RDR2-sensitive |
| ACGGTAGAATAAGCGGGCGGGCTC  | 0  | 18  | RDR2-sensitive |
| ACGGTAGAATAAGCGGGCGGGCTT  | 28 | 619 | RDR2-sensitive |
| ACGGTAGAATAAGCGGGCGGGTTT  | 0  | 25  | RDR2-sensitive |
| ACGGTAGAATAAGTGGACGGGCTT  | 1  | 27  | RDR2-sensitive |
| ACGGTAGAATAAGTGGGCGGGCTT  | 0  | 21  | RDR2-sensitive |
| ACGGTAGAATGGACGGCTGAGATC  | 0  | 18  | RDR2-sensitive |
| ACGGTAGTGTAGACCAGGCACAAC  | 0  | 13  | RDR2-sensitive |
| ACGGTATCGTAGACAGCCGTCGGA  | 0  | 9   | RDR2-sensitive |
| ACGGTATGAAGACGCTGCACCCGT  | 0  | 23  | RDR2-sensitive |
| ACGGTCAACGCACGGCATGAGCTT  | 0  | 19  | RDR2-sensitive |
| ACGGTCAACTGAACGCGGTGGGCC  | 0  | 13  | RDR2-sensitive |
| ACGGTCAAGCCTTATCTCCGACGG  | 0  | 9   | RDR2-sensitive |
| ACGGTCAATTTATCTCCGACGGCT  | 0  | 9   | RDR2-sensitive |
| ACGGTCACGTAGAAAAGCATGTCTT | 0  | 17  | RDR2-sensitive |
| ACGGTCAGGCAGAGCAACAGGATG  | 1  | 15  | RDR2-sensitive |
| ACGGTCATACGGCGAACAGAACGA  | 0  | 22  | RDR2-sensitive |
| ACGGTCATCTATACTCTCCAGCAG  | 0  | 10  | RDR2-sensitive |
| ACGGTCATGGCCTGACACGAGCAT  | 0  | 33  | RDR2-sensitive |
| ACGGTCCAACGAAGACACGACATG  | 0  | 9   | RDR2-sensitive |
| ACGGTCCAAGACAACCGTCCGACA  | 0  | 14  | RDR2-sensitive |
| ACGGTCCAAGCACTGCACGACGCT  | 0  | 9   | RDR2-sensitive |
| ACGGTCCATCTGTACGGCTGTACC  | 0  | 20  | RDR2-sensitive |
| ACGGTCCCGTAGGCAACCGTCCGGA | 0  | 13  | RDR2-sensitive |
| ACGGTCCGACGAAGACACGACGTG  | 0  | 10  | RDR2-sensitive |
| ACGGTCCGCAGCTCTGGGCCGGAC  | 1  | 20  | RDR2-sensitive |
| ACGGTCCGGATGTGTGCAGATCGG  | 0  | 9   | RDR2-sensitive |
| ACGGTCCGTAGATACGCAGATGAT  | 0  | 12  | RDR2-sensitive |
| ACGGTCCGTCGCTCTGGACCGGAC  | 0  | 11  | RDR2-sensitive |
| ACGGTCCGTGAGCCTGTTAGTCGT  | 1  | 81  | RDR2-sensitive |
| ACGGTCCGTGGCTCTGGACCGGAT  | 0  | 36  | RDR2-sensitive |
| ACGGTCCTGTAGGAGGCCGTCGGA  | 0  | 33  | RDR2-sensitive |
| ACGGTCGACTGCAACGCATTAAT   | 2  | 36  | RDR2-sensitive |
| ACGGTCGACTGCAACGCATTTAAT  | 1  | 34  | RDR2-sensitive |
| ACGGTCGACTGCTACAGACGCCAA  | 1  | 24  | RDR2-sensitive |
| ACGGTCGACTGCTACAGGCGCCAA  | 5  | 29  | RDR2-sensitive |
| ACGGTCGCGACAGAACACGGTACT  | 0  | 16  | RDR2-sensitive |
| ACGGTCGCTGTTACGGTAGTCCTT  | 0  | 10  | RDR2-sensitive |
| ACGGTCGGCTGACGTGGCGTGCAC  | 4  | 35  | RDR2-sensitive |
| ACGGTCGGTACCGGTGCATGGCCT  | 0  | 21  | RDR2-sensitive |
| ACGGTCGGTCCGGCACAACCCGTT  | 0  | 12  | RDR2-sensitive |
| ACGGTCGTGACCCGGCATGAGCAT  | 0  | 106 | RDR2-sensitive |
| ACGGTCTACCCGTTAAAGTCTGAG  | 19 | 0   | RDR2-resistant |
| ACGGTCTAGATTGGTGGAAAGGCAG | 0  | 18  | RDR2-sensitive |



|                           |     |    |                |
|---------------------------|-----|----|----------------|
| ACGGTCTATTTAGTAGGGCGGTAA  | 0   | 64 | RDR2-sensitive |
| ACGGTCTCCTAGGCAGCCGTCGGA  | 0   | 11 | RDR2-sensitive |
| ACGGTCTCGTAGACAGCCGTCGGA  | 0   | 16 | RDR2-sensitive |
| ACGGTCTGAAGACGGGTATAAGCC  | 0   | 10 | RDR2-sensitive |
| ACGGTCTGCGCACGGTGCTGTCAT  | 0   | 13 | RDR2-sensitive |
| ACGGTCTGCTGAAGATGGCCTGAC  | 0   | 13 | RDR2-sensitive |
| ACGGTCTGCTGACGTGGCTGGCGC  | 4   | 48 | RDR2-sensitive |
| ACGGTCTGTAACCGGAAGGTCCGG  | 0   | 18 | RDR2-sensitive |
| ACGGTCTGTAACCTGGGCGCAGGA  | 1   | 25 | RDR2-sensitive |
| ACGGTCTGTAGACGAGGGTCGGAC  | 2   | 18 | RDR2-sensitive |
| ACGGTCTGTAGTAGGAATGTGCAT  | 1   | 38 | RDR2-sensitive |
| ACGGTCTGTGCCGCTACGATGGAC  | 0   | 11 | RDR2-sensitive |
| ACGGTCTGTGCTCTGGGCCGGATG  | 0   | 17 | RDR2-sensitive |
| ACGGTCTGTGCTGCTACGGTGGAC  | 0   | 29 | RDR2-sensitive |
| ACGGTCTGTGGCCAGAGGCTGGAT  | 0   | 15 | RDR2-sensitive |
| ACGGTCTTAGGGCCCTGGCGACGG  | 0   | 12 | RDR2-sensitive |
| ACGGTCTTGTAGGTAGCCGTCGGA  | 0   | 25 | RDR2-sensitive |
| ACGGTGAAGAATAAGCTCGACGAG  | 77  | 1  | RDR2-resistant |
| ACGGTGAGCTAACTCGGCATGACT  | 0   | 9  | RDR2-sensitive |
| ACGGTGATCGGGCTGAACCGGCAT  | 0   | 9  | RDR2-sensitive |
| ACGGTGATGGCTGTAAGCGCGCGG  | 0   | 9  | RDR2-sensitive |
| ACGGTGCAATCCGGTTCGAGTCGGA | 0   | 9  | RDR2-sensitive |
| ACGGTGCAGATTGGCTGAAGGCAG  | 1   | 14 | RDR2-sensitive |
| ACGGTGCCGAGTGGAAGGGACGTC  | 0   | 12 | RDR2-sensitive |
| ACGGTGCTGAGTTAAAGCGACGGT  | 0   | 15 | RDR2-sensitive |
| ACGGTGGAAGAAGCTGGTGCCCAT  | 143 | 20 | RDR2-resistant |
| ACGGTGGAAGAAGCTGGTGCCCT   | 17  | 0  | RDR2-resistant |
| ACGGTGGACTGTTCTGTATGGCGC  | 1   | 44 | RDR2-sensitive |
| ACGGTGGAGACAGACAGAGGACGA  | 0   | 34 | RDR2-sensitive |
| ACGGTGGCAGAACGGGAATGACAG  | 0   | 11 | RDR2-sensitive |
| ACGGTGGGCTGCACGCTGGGACGG  | 0   | 10 | RDR2-sensitive |
| ACGGTGTAGATTGGCTGAAGGCAG  | 0   | 11 | RDR2-sensitive |
| ACGGTGTAGATTTACCAAAGGCAG  | 0   | 10 | RDR2-sensitive |
| ACGGTGTATTATGAAGAGCGGCAA  | 0   | 27 | RDR2-sensitive |
| ACGGTGTGGTAGCTGCACGGACGG  | 0   | 10 | RDR2-sensitive |
| ACGGTGTGTAGACGTCCATATCGT  | 0   | 10 | RDR2-sensitive |
| ACGGTTAATTGGTAGGCACGGTAA  | 0   | 75 | RDR2-sensitive |
| ACGGTTAATTTGTAGGTACGGTAA  | 0   | 9  | RDR2-sensitive |
| ACGGTTAGAAAACCGGGTCGGGCC  | 2   | 60 | RDR2-sensitive |
| ACGGTTAGAAAATCGGGTCGGACC  | 0   | 13 | RDR2-sensitive |
| ACGGTTAGACTGTTGCTGACGGCT  | 0   | 16 | RDR2-sensitive |
| ACGGTTATAAAACCGGGTCGGGAC  | 0   | 10 | RDR2-sensitive |
| ACGGTTCAGATCGTTAGACGACA   | 0   | 11 | RDR2-sensitive |
| ACGGTTCAGATCGTTAGATAACCT  | 0   | 13 | RDR2-sensitive |
| ACGGTTCAGATCGTTGGATAACCC  | 0   | 52 | RDR2-sensitive |
| ACGGTTCAGATCGTTGGATAATCT  | 0   | 9  | RDR2-sensitive |
| ACGGTTCATCTCTGCAAGGACTGC  | 1   | 41 | RDR2-sensitive |
| ACGGTTCGCTAGCCGGTCTGACG   | 0   | 11 | RDR2-sensitive |
| ACGGTTCGGATCGATAGAAGGCAG  | 0   | 9  | RDR2-sensitive |

|                           |    |    |                |
|---------------------------|----|----|----------------|
| ACGGTTCTCGGATTGGATCGGTAT  | 1  | 24 | RDR2-sensitive |
| ACGGTTCTCTACGCTCTCCAGCAG  | 0  | 13 | RDR2-sensitive |
| ACGGTTCTCTTGAGTAATTGACGC  | 0  | 13 | RDR2-sensitive |
| ACGGTTCTGACCATATCCTTGGCC  | 15 | 0  | RDR2-resistant |
| ACGGTTCTGTGGAGAGGGTATCTC  | 0  | 13 | RDR2-sensitive |
| ACGGTTCTTGTTGAGTGTGGCA    | 0  | 10 | RDR2-sensitive |
| ACGGTTCTTGTTGAGTGTGGCG    | 3  | 28 | RDR2-sensitive |
| ACGGTTGCCTACGGGGCCGTCGGA  | 0  | 9  | RDR2-sensitive |
| ACGGTTGCTCTGGGCCATCGGATA  | 0  | 10 | RDR2-sensitive |
| ACGGTTGGACGATCGGGTGGGGGC  | 0  | 13 | RDR2-sensitive |
| ACGGTTGGACTTAACGTTATCGGT  | 0  | 11 | RDR2-sensitive |
| ACGGTTGGATCTTGAACAAACGGA  | 0  | 10 | RDR2-sensitive |
| ACGGTTGGGTGACGTGGCTGGCGC  | 0  | 16 | RDR2-sensitive |
| ACGGTTGTAATTATATCTGACGGC  | 1  | 13 | RDR2-sensitive |
| ACGGTTGTCAACTGTAGATGGCTT  | 0  | 12 | RDR2-sensitive |
| ACGGTTGTCTTGACCGTCGGATA   | 0  | 9  | RDR2-sensitive |
| ACGGTTGTTAGCTAGATTCGCGGA  | 4  | 18 | RDR2-sensitive |
| ACGGTTTAGATTGTTGGATAACAC  | 0  | 17 | RDR2-sensitive |
| ACGGTTTCTGCAGACGGGTTGGAT  | 0  | 16 | RDR2-sensitive |
| ACGGTTTCTGTAAGAAGGGGGCGA  | 0  | 14 | RDR2-sensitive |
| ACGGTTTGTAGAAGACATCGGCTC  | 0  | 33 | RDR2-sensitive |
| ACGGTTTGTGACATCGGATCGGCT  | 0  | 9  | RDR2-sensitive |
| ACGGTTTGTGACCTGACAGCCGGA  | 0  | 12 | RDR2-sensitive |
| ACGGTTTAAAGCCGTCGGACATAA  | 0  | 9  | RDR2-sensitive |
| ACGTAAATTTACTTCGGTTTAGGG  | 0  | 9  | RDR2-sensitive |
| ACGTAACCTCGGGAGTGGACGGGAC | 0  | 9  | RDR2-sensitive |
| ACGTAAGCGGACTGACTATCGGAT  | 0  | 10 | RDR2-sensitive |
| ACGTAATGGGCGCTGTAGGGGGCA  | 0  | 46 | RDR2-sensitive |
| ACGTACATACGCGTAGAAGGACAA  | 0  | 12 | RDR2-sensitive |
| ACGTACCGGAGACGTGAGCTGCAT  | 0  | 15 | RDR2-sensitive |
| ACGTACCGGGCGTAGAAGATGCGG  | 0  | 38 | RDR2-sensitive |
| ACGTACCTAGGAGGACTGCGCTAC  | 0  | 14 | RDR2-sensitive |
| ACGTACGCTAGACTGTGACGCGCT  | 0  | 25 | RDR2-sensitive |
| ACGTACGTAGAGAAGGAGCCGCTC  | 0  | 10 | RDR2-sensitive |
| ACGTACGTAGGACAGGCCGGTCTC  | 0  | 16 | RDR2-sensitive |
| ACGTACGTGCTGATGGAACCCGGC  | 0  | 13 | RDR2-sensitive |
| ACGTACGTTGGCACTAATAGGCAT  | 1  | 74 | RDR2-sensitive |
| ACGTACTGCACAGCCGAACGGTAA  | 0  | 14 | RDR2-sensitive |
| ACGTACTGTTTGACGTTGACGGG   | 0  | 23 | RDR2-sensitive |
| ACGTAGAACCGAACCGTGTGGGAC  | 0  | 10 | RDR2-sensitive |
| ACGTAGAACTGGGTCGTACCGGAC  | 0  | 59 | RDR2-sensitive |
| ACGTAGAATATATCTCGGCGCCAT  | 1  | 19 | RDR2-sensitive |
| ACGTAGAATCTTATATCCGACGGG  | 0  | 18 | RDR2-sensitive |
| ACGTAGAATGAGGATAGGGAGCGC  | 0  | 12 | RDR2-sensitive |
| ACGTAGACACTCGGTGAAGACCGA  | 0  | 10 | RDR2-sensitive |
| ACGTAGACCGCCGAACGCGGACAT  | 0  | 10 | RDR2-sensitive |
| ACGTAGACGGCAGAACGGCAGAAC  | 0  | 34 | RDR2-sensitive |
| ACGTAGAGAGATTCTAGGACGGTT  | 0  | 15 | RDR2-sensitive |
| ACGTAGAGCATGACCGGCTGGTGC  | 15 | 0  | RDR2-resistant |

|                           |    |     |                |
|---------------------------|----|-----|----------------|
| ACGTAGAGCGGAGTAGGCTGGCGC  | 0  | 16  | RDR2-sensitive |
| ACGTAGAGCGTATGTTAACGGCGT  | 0  | 30  | RDR2-sensitive |
| ACGTAGAGGATGCTGTAGAGGGCA  | 0  | 19  | RDR2-sensitive |
| ACGTAGAGGCACTATAGAGGGCAC  | 0  | 15  | RDR2-sensitive |
| ACGTAGAGGGCGCTGTAGAGGCAC  | 1  | 130 | RDR2-sensitive |
| ACGTAGAGGGCGCTGTAGGGGGCA  | 5  | 121 | RDR2-sensitive |
| ACGTAGAGTGCATCTGGCGCCGGA  | 62 | 8   | RDR2-resistant |
| ACGTAGATGGCAGAACACGTAGAC  | 0  | 9   | RDR2-sensitive |
| ACGTAGCAGATCAGCGAGGACGAC  | 0  | 9   | RDR2-sensitive |
| ACGTAGCCGACGGAGCTTTGCGAC  | 19 | 1   | RDR2-resistant |
| ACGTAGGACTGTGCAGGCCCGGCC  | 0  | 132 | RDR2-sensitive |
| ACGTAGGACTGTGCAGGCCCGGCT  | 1  | 39  | RDR2-sensitive |
| ACGTAGGAGGCGCTGTAGGGGCAC  | 0  | 202 | RDR2-sensitive |
| ACGTAGGAGGCGCTGTAGGGGGCA  | 3  | 52  | RDR2-sensitive |
| ACGTAGGGACCGGCAACAAGACGA  | 0  | 11  | RDR2-sensitive |
| ACGTAGGGACGCTGTAGGGGGCAC  | 0  | 51  | RDR2-sensitive |
| ACGTAGGGACTGACATCAAGACGA  | 0  | 25  | RDR2-sensitive |
| ACGTAGGGACTGGCATCAAGACGA  | 0  | 26  | RDR2-sensitive |
| ACGTAGGGAGCGCTGTAGGGAGCA  | 0  | 9   | RDR2-sensitive |
| ACGTAGGGAGCGCTGTAGGGGGCA  | 0  | 38  | RDR2-sensitive |
| ACGTAGGGGACGCTGTAGAGGGCA  | 0  | 68  | RDR2-sensitive |
| ACGTAGGGGACGCTGTAGGGGCAC  | 0  | 25  | RDR2-sensitive |
| ACGTAGGGGACGCTGTAGGGGGCA  | 0  | 20  | RDR2-sensitive |
| ACGTAGGGGCGCTGTAGAGGGCAC  | 3  | 599 | RDR2-sensitive |
| ACGTAGGGGCGCTGTAGAGGGCCC  | 0  | 11  | RDR2-sensitive |
| ACGTAGGGGCGCTGTAGGGGGCAC  | 3  | 139 | RDR2-sensitive |
| ACGTAGGGGGCGCTGTAGAGGCAC  | 0  | 49  | RDR2-sensitive |
| ACGTAGGGGGCGCTGTAGAGGGCA  | 0  | 27  | RDR2-sensitive |
| ACGTAGGGGGCGCTGTAGGAGGCA  | 0  | 69  | RDR2-sensitive |
| ACGTAGGGGGCGCTGTAGGGGCAC  | 6  | 269 | RDR2-sensitive |
| ACGTAGGGGGCGCTGTAGGGGCAT  | 2  | 32  | RDR2-sensitive |
| ACGTAGGGGGCGCTGTAGGGGCCC  | 0  | 9   | RDR2-sensitive |
| ACGTAGGGGGCGCTGTAGGGGGCA  | 18 | 257 | RDR2-sensitive |
| ACGTAGGGGGCGCTGTAGGGGGCC  | 0  | 12  | RDR2-sensitive |
| ACGTAGGGGGCGCTGTAGGGGGGC  | 0  | 15  | RDR2-sensitive |
| ACGTAGGGGGCGCTGTAGTGGGCA  | 0  | 20  | RDR2-sensitive |
| ACGTAGGGGGCGCTGTAGGAGGC   | 0  | 13  | RDR2-sensitive |
| ACGTAGGGGTGCGCTGTAGGAGGCA | 0  | 12  | RDR2-sensitive |
| ACGTAGGTCTCGGTTGAAGGGCAC  | 0  | 9   | RDR2-sensitive |
| ACGTAGTCCGTAGACGATGGCTTA  | 0  | 14  | RDR2-sensitive |
| ACGTAGTGGGCGCTGTAGGGGCAC  | 2  | 354 | RDR2-sensitive |
| ACGTAGTGGGCGCTGTAGGGGCCC  | 0  | 15  | RDR2-sensitive |
| ACGTAGTGGTCTGGGACAAAGCAA  | 0  | 9   | RDR2-sensitive |
| ACGTATGACCGTATAGACAGGCAC  | 0  | 9   | RDR2-sensitive |
| ACGTATGGATTGGACGGGATTGGA  | 0  | 16  | RDR2-sensitive |
| ACGTATGGGGCGCTGTAGGGGGCA  | 0  | 22  | RDR2-sensitive |
| ACGTATGGTCTGTTGGTGGCTGCA  | 0  | 11  | RDR2-sensitive |
| ACGTATGTAGAACCTGTGGGGGCG  | 0  | 10  | RDR2-sensitive |
| ACGTATTCGGACAAGTGC GGCTGG | 0  | 12  | RDR2-sensitive |

|                          |     |     |                |
|--------------------------|-----|-----|----------------|
| ACGTCAAAATGTAGTTAGCGGAGT | 124 | 9   | RDR2-resistant |
| ACGTCAAGCGACTTTAGTCGGATA | 19  | 0   | RDR2-resistant |
| ACGTCACCGGTCTGCACATGCATC | 16  | 0   | RDR2-resistant |
| ACGTCACTGTAAATATGTTTAGGA | 0   | 11  | RDR2-sensitive |
| ACGTCAGATCCACGTAGACGTCGA | 0   | 15  | RDR2-sensitive |
| ACGTCAGCTGTAGACGGATGTTGA | 0   | 13  | RDR2-sensitive |
| ACGTCATACGTGCTGCAGAGCGGT | 0   | 13  | RDR2-sensitive |
| ACGTCATGCCGGCCTGCTAACTGT | 0   | 9   | RDR2-sensitive |
| ACGTCCATGTCTAGATCGTGCCGG | 0   | 69  | RDR2-sensitive |
| ACGTCCATGTCTAGATCGTGTCGG | 0   | 14  | RDR2-sensitive |
| ACGTCCGACGGCTGCCAGAGAAGC | 0   | 14  | RDR2-sensitive |
| ACGTCCGACGGCTGTCAGACAGGC | 0   | 12  | RDR2-sensitive |
| ACGTCCGATGGCTGTCAGACAGGC | 0   | 9   | RDR2-sensitive |
| ACGTCCTCGGTCCAAACACGGCTC | 0   | 16  | RDR2-sensitive |
| ACGTCCTGTGGAAGAAGCGGCGCC | 0   | 10  | RDR2-sensitive |
| ACGTCGCGGTGTGTGTGGAACGGC | 1   | 15  | RDR2-sensitive |
| ACGTCTACTGAGCGAACACGGCAA | 0   | 15  | RDR2-sensitive |
| ACGTCTGTATGCACTCAGGGGCGG | 0   | 108 | RDR2-sensitive |
| ACGTGAAGGACGCCGACGACTGCA | 64  | 0   | RDR2-resistant |
| ACGTGAATTGCTGATCCTGGCACG | 0   | 9   | RDR2-sensitive |
| ACGTGACAGTCAGGCAGCCTCGGG | 0   | 12  | RDR2-sensitive |
| ACGTGACAGTGGAGTCGGCGCAA  | 2   | 21  | RDR2-sensitive |
| ACGTGACCTGTAGATGAGGTCTAT | 0   | 22  | RDR2-sensitive |
| ACGTGACGGACTTATTTGCGGCGG | 0   | 9   | RDR2-sensitive |
| ACGTGACGGCCGTTGAAACTGGTG | 0   | 11  | RDR2-sensitive |
| ACGTGAGGACATTGCAGAACGGAT | 0   | 24  | RDR2-sensitive |
| ACGTGCACTGGGCCAGGCTGGCAC | 0   | 15  | RDR2-sensitive |
| ACGTGCACTGTATAAGGGGAGAGG | 0   | 19  | RDR2-sensitive |
| ACGTGCAGACCGGTGACGTAGAGT | 35  | 0   | RDR2-resistant |
| ACGTGCCACGTAGATCCAGGTCAC | 1   | 21  | RDR2-sensitive |
| ACGTGCCGGGCTCATTTGCGGCGG | 0   | 21  | RDR2-sensitive |
| ACGTGCCGGGCTTATTTGCGGCGG | 0   | 9   | RDR2-sensitive |
| ACGTGCGGACCGTCCGGCCCCAGG | 0   | 10  | RDR2-sensitive |
| ACGTGCGGAGGAAGATAAAGGTGT | 0   | 11  | RDR2-sensitive |
| ACGTGCGGGCGCGTGTGTGCGGGC | 0   | 19  | RDR2-sensitive |
| ACGTGCTGCGTTGGCACAAGTCGG | 0   | 10  | RDR2-sensitive |
| ACGTGCTGGACTTATTTGCGGCGG | 1   | 16  | RDR2-sensitive |
| ACGTGCTGTGCTGACACAACCGGA | 0   | 13  | RDR2-sensitive |
| ACGTGCTTCGTGCCGGACTAACGG | 0   | 10  | RDR2-sensitive |
| ACGTGGAACCGAGCTCGACGCCAC | 0   | 9   | RDR2-sensitive |
| ACGTGGAACCGAGCTCGGCGCCAC | 0   | 14  | RDR2-sensitive |
| ACGTGGAACCGAGCTCGGCGCCAT | 2   | 22  | RDR2-sensitive |
| ACGTGGACAATTCCGGAACGGCGA | 0   | 15  | RDR2-sensitive |
| ACGTGGACCAATCAGATCGCGACA | 4   | 176 | RDR2-sensitive |
| ACGTGGACCAATCAGATCGCGCCA | 1   | 35  | RDR2-sensitive |
| ACGTGGACCAGTCAGATCGCGCCA | 1   | 94  | RDR2-sensitive |
| ACGTGGACCAGTCAGATCGCGTCA | 0   | 18  | RDR2-sensitive |
| ACGTGGACCGTCCGACTTCGGCGC | 0   | 12  | RDR2-sensitive |
| ACGTGGACGCAGGACAGAAGCCGT | 0   | 10  | RDR2-sensitive |

|                            |    |     |                |
|----------------------------|----|-----|----------------|
| ACGTGGACGCATGTAGGAGCGGGA   | 0  | 13  | RDR2-sensitive |
| ACGTGGAGTAGGCAAGTGTGGAC    | 1  | 22  | RDR2-sensitive |
| ACGTGGATGGAGAATCGGCTCTAC   | 0  | 13  | RDR2-sensitive |
| ACGTGGATTTCTAGCAGAGAGCAC   | 0  | 18  | RDR2-sensitive |
| ACGTGGGCCTCAGAGCAGGACGAG   | 0  | 75  | RDR2-sensitive |
| ACGTGGGCCTCCATGTTGGACGAG   | 0  | 11  | RDR2-sensitive |
| ACGTGGGCCTCTGAGCTGGACGAG   | 16 | 251 | RDR2-sensitive |
| ACGTGGGCCTCTGAGCTGGACGTG   | 0  | 16  | RDR2-sensitive |
| ACGTGGTTGGGCTGACGACGGAAA   | 0  | 13  | RDR2-sensitive |
| ACGTGTAGGTACATGTCGGATCAC   | 0  | 11  | RDR2-sensitive |
| ACGTGTATATGTAGCGCGGCCTAA   | 0  | 11  | RDR2-sensitive |
| ACGTGTCCGGACCATAACCATGTAC  | 1  | 12  | RDR2-sensitive |
| ACGTGTCCGCAAGCGAGAGGACTG   | 0  | 10  | RDR2-sensitive |
| ACGTGTCCGGCACGCATGAGAGGCT  | 0  | 9   | RDR2-sensitive |
| ACGTGTCCGGCGAAGCAGGCCCGCG  | 0  | 9   | RDR2-sensitive |
| ACGTGTCCGGGCTCATTTCCGGGCGG | 1  | 21  | RDR2-sensitive |
| ACGTGTCCGGGCTTATTTCCGGGCGG | 0  | 11  | RDR2-sensitive |
| ACGTGTCCGTGCTGGTCCGGCTATT  | 0  | 16  | RDR2-sensitive |
| ACGTGTGACGGGCCACCGGACTGT   | 0  | 9   | RDR2-sensitive |
| ACGTGTGACTGTTATGAAGGTATT   | 0  | 25  | RDR2-sensitive |
| ACGTGTGGACTACGTGGAGACGCA   | 0  | 9   | RDR2-sensitive |
| ACGTGTGGACTACGTGGAGGCGCA   | 0  | 14  | RDR2-sensitive |
| ACGTGTGGACTATGTAGAGGCGTA   | 0  | 42  | RDR2-sensitive |
| ACGTGTGGACTATGTGGAAGCGCA   | 1  | 32  | RDR2-sensitive |
| ACGTGTGGAGATGGCGCTGATGAC   | 0  | 24  | RDR2-sensitive |
| ACGTGTGTGGGCTCTGACGCACGG   | 1  | 23  | RDR2-sensitive |
| ACGTGTTAGTCTGTGAGGATGGTC   | 0  | 10  | RDR2-sensitive |
| ACGTGTTTCGTACGTGGATCGGTGA  | 3  | 30  | RDR2-sensitive |
| ACGTGTTTGACGACTCGACGGCAA   | 4  | 20  | RDR2-sensitive |
| ACGTGTTTTGTGGGCTGAGCCGGT   | 1  | 12  | RDR2-sensitive |
| ACGTTAACTAGTGGCGTTTTGGAT   | 0  | 15  | RDR2-sensitive |
| ACGTTACCTGGACGTGTGAAGCGC   | 0  | 17  | RDR2-sensitive |
| ACGTTACGCGGGCTGGGCCGTGCT   | 0  | 19  | RDR2-sensitive |
| ACGTTACGCGGGCTGGGTCTGTGCT  | 0  | 14  | RDR2-sensitive |
| ACGTTACGTGCGAGATCTCCGGAC   | 0  | 9   | RDR2-sensitive |
| ACGTTACGTGCGAGATCTCCGGGC   | 0  | 23  | RDR2-sensitive |
| ACGTTACTGCTGTAGTATGGATGG   | 0  | 13  | RDR2-sensitive |
| ACGTTACTGGAGAGCGTAGAGGAC   | 0  | 16  | RDR2-sensitive |
| ACGTTAGACGGGCTGGGTCTGTGCT  | 1  | 13  | RDR2-sensitive |
| ACGTTAGACGGGCTGTGCCGTGCT   | 0  | 12  | RDR2-sensitive |
| ACGTTCCGGGCTTTAGAGGGTGTG   | 0  | 21  | RDR2-sensitive |
| ACGTTCCGGGATTTGGTTTCGGCT   | 0  | 10  | RDR2-sensitive |
| ACGTTCCGGCTCGTCTGGCTGGGGC  | 0  | 9   | RDR2-sensitive |
| ACGTTCTTAAGTTAAGTTCGTCCG   | 0  | 15  | RDR2-sensitive |
| ACGTTGACACTGCGGACGGTGAGA   | 0  | 16  | RDR2-sensitive |
| ACGTTGACTGTGACCAGACGCGTG   | 0  | 10  | RDR2-sensitive |
| ACGTTGACTTTGTGGAAGCGTGTG   | 0  | 14  | RDR2-sensitive |
| ACGTTGCGCGGACGCTAGGGGCAC   | 0  | 10  | RDR2-sensitive |
| ACGTTGCTGGAGAGAGTAGAGGAC   | 0  | 10  | RDR2-sensitive |

|                          |     |    |                |
|--------------------------|-----|----|----------------|
| ACGTTGCTGGAGAGCGTAGAAGAC | 0   | 12 | RDR2-sensitive |
| ACGTTGCTGGAGAGCGTAGAGGAC | 0   | 54 | RDR2-sensitive |
| ACGTTGCTGGAGAGTGTAGAAGAC | 0   | 26 | RDR2-sensitive |
| ACGTTGCTGGAGGGAGTAGAGGAC | 6   | 87 | RDR2-sensitive |
| ACGTTGCTGGATGGAGTAGAGGAC | 0   | 21 | RDR2-sensitive |
| ACGTTGCTGGGCGCGTTGAGGACG | 0   | 9  | RDR2-sensitive |
| ACGTTGCTGTAGCGAGTAGAGGAC | 1   | 74 | RDR2-sensitive |
| ACGTTGTACGGCGTGGTAGACGGA | 0   | 9  | RDR2-sensitive |
| ACGTTGTACGGCGTGGTAGACGGG | 0   | 11 | RDR2-sensitive |
| ACGTTGTGGATTTGGCGCAGGCTC | 0   | 9  | RDR2-sensitive |
| ACGTTGTTGAACGTGTAGAGGACA | 0   | 10 | RDR2-sensitive |
| ACGTTGTTGGAGGGGTAGAGGACG | 0   | 26 | RDR2-sensitive |
| ACGTTTATGGCTAGGCTCGTTGGC | 0   | 16 | RDR2-sensitive |
| ACGTTTATTATGTCGGTCCGGCGC | 32  | 0  | RDR2-resistant |
| ACGTTTCGACGCTCTGGGTGGCCG | 0   | 13 | RDR2-sensitive |
| ACGTTTGGACCCGAAGCTCGGCGC | 1   | 18 | RDR2-sensitive |
| ACGTTTGGTTCGTTGTATCTAGGA | 0   | 20 | RDR2-sensitive |
| ACGTTTTAGGGCTGGTTTGGTAGC | 0   | 15 | RDR2-sensitive |
| ACTAAAGCGGTCAGACGGTGGAGA | 0   | 12 | RDR2-sensitive |
| ACTAAATCGTTTGGATAGCGTCAC | 0   | 10 | RDR2-sensitive |
| ACTAAATTTTGTAGTGGCTTGGAT | 153 | 1  | RDR2-resistant |
| ACTAAATTTTTGTCGTGTCGGTAC | 0   | 12 | RDR2-sensitive |
| ACTAACAGGCACGGCACGGATCTT | 0   | 16 | RDR2-sensitive |
| ACTAACAGTTTAGATCGTTGGACA | 0   | 16 | RDR2-sensitive |
| ACTAACATCGGTACCTTTGGCATG | 21  | 0  | RDR2-resistant |
| ACTAACCGGACCGGGTCGTGCCTA | 0   | 13 | RDR2-sensitive |
| ACTAACCGGACCGGGTCGTGCCTG | 0   | 10 | RDR2-sensitive |
| ACTAACCTCTGGATAATGGGGGCA | 22  | 2  | RDR2-resistant |
| ACTAACGACGGCAGAACGGCAGAA | 0   | 10 | RDR2-sensitive |
| ACTAAGGACTGAACATCATTATC  | 29  | 2  | RDR2-resistant |
| ACTAAGGGACATGTAGCGTCGGAT | 0   | 17 | RDR2-sensitive |
| ACTAATAATTTGTTGTGTGATCG  | 19  | 1  | RDR2-resistant |
| ACTAATACTTTGATCAGAGGGTGA | 21  | 1  | RDR2-resistant |
| ACTAATTATTGGTCGTGGTATGTC | 26  | 1  | RDR2-resistant |
| ACTAATTGGATGTAAGCATGTTTT | 32  | 0  | RDR2-resistant |
| ACTAATTTAAAGGATCGTCTCATC | 0   | 11 | RDR2-sensitive |
| ACTAATTTGGAGACTGCTTGGTAT | 47  | 0  | RDR2-resistant |
| ACTACACAAAGGACGGAGCGGCTC | 0   | 23 | RDR2-sensitive |
| ACTACATTTATGTGATCTTAGGGT | 0   | 9  | RDR2-sensitive |
| ACTACCAGTGCAGATCGTCCGGAC | 0   | 51 | RDR2-sensitive |
| ACTACCATCCGATCTTTGGACATC | 0   | 11 | RDR2-sensitive |
| ACTACCATCTGATCTTTGGACATC | 0   | 11 | RDR2-sensitive |
| ACTACCCAGTCGGACGGTCCGCAT | 0   | 9  | RDR2-sensitive |
| ACTACCGGAATCGACGGCTTTGCC | 0   | 14 | RDR2-sensitive |
| ACTACCGGAATTCGGCTCTTTGCC | 0   | 14 | RDR2-sensitive |
| ACTACCGGCAAACACTCGGCAA   | 0   | 9  | RDR2-sensitive |
| ACTACCTATCGGGCCGTGCCGGCA | 0   | 15 | RDR2-sensitive |
| ACTACGATCAGGACGAGATCGGAT | 44  | 2  | RDR2-resistant |
| ACTACGCTCTGGGCTGGACGGTCC | 0   | 12 | RDR2-sensitive |

|                             |     |     |                |
|-----------------------------|-----|-----|----------------|
| ACTACGGCTAGCAGACGGACTCAT    | 0   | 10  | RDR2-sensitive |
| ACTACTACCGTACGCGATTGTCTC    | 0   | 9   | RDR2-sensitive |
| ACTACTCGATTGTGGATCAACGGC    | 0   | 10  | RDR2-sensitive |
| ACTACTCTGGGCCAGCAACAGCAC    | 1   | 39  | RDR2-sensitive |
| ACTACTGGTTCTCTGCTCGGTGGC    | 0   | 14  | RDR2-sensitive |
| ACTACTGTCGTCCGACGGCCACG     | 71  | 7   | RDR2-resistant |
| ACTACTGTTGATCCGGCGACGGTG    | 0   | 9   | RDR2-sensitive |
| ACTACTGTTTTTTGGACGGCCGTC    | 0   | 23  | RDR2-sensitive |
| ACTACTTAAGACTGTAGTGTAGGC    | 0   | 10  | RDR2-sensitive |
| ACTACTTATTGCTGCTCGTCGACC    | 32  | 0   | RDR2-resistant |
| ACTAGAACGAGATTGTGTATTGAA    | 17  | 0   | RDR2-resistant |
| ACTAGAACGATGCTTGAGGCGATG    | 17  | 1   | RDR2-resistant |
| ACTAGACCTGTAGCCTGACGGTGA    | 0   | 14  | RDR2-sensitive |
| ACTAGACTAGTAGCAAGGCCTCAG    | 0   | 21  | RDR2-sensitive |
| ACTAGACTCATGTCGTGTCGGCAC    | 0   | 11  | RDR2-sensitive |
| ACTAGACTCGACAGATGTATGACC    | 16  | 0   | RDR2-resistant |
| ACTAGAGCTCTCGGCACAGGGACT    | 1   | 15  | RDR2-sensitive |
| ACTAGAGGACGACGAACGTGCAGA    | 0   | 30  | RDR2-sensitive |
| ACTAGAGTAGATATCATCTTTAAT    | 41  | 0   | RDR2-resistant |
| ACTAGAGTAGATATCATTTTTAAT    | 113 | 1   | RDR2-resistant |
| ACTAGATCCGAGGGACTGACGGGT    | 13  | 37  | RDR2-sensitive |
| ACTAGATCTGAGGGACTGACGGGT    | 0   | 30  | RDR2-sensitive |
| ACTAGATCTGAGGGACTGACGGTT    | 27  | 0   | RDR2-resistant |
| ACTAGCACACGATCGGACGCGCAT    | 0   | 10  | RDR2-sensitive |
| ACTAGCACGGTGTATTCTTGGCAT    | 0   | 11  | RDR2-sensitive |
| ACTAGCTGAGAGAACGTTGCGCGG    | 0   | 10  | RDR2-sensitive |
| ACTAGGAACGCTGGGCCAGCACGG    | 0   | 11  | RDR2-sensitive |
| ACTAGGACTGAACGGCTACATTCT    | 0   | 10  | RDR2-sensitive |
| ACTAGGAGCCTAGGACGACGGTGA    | 0   | 9   | RDR2-sensitive |
| ACTAGGGCTCTGAGCCATTAGAGG    | 1   | 32  | RDR2-sensitive |
| ACTAGGGTTCGGTTGTGTTATCATC   | 18  | 0   | RDR2-resistant |
| ACTAGGGTTGTACAGTTTGACGGT    | 1   | 24  | RDR2-sensitive |
| ACTAGGTGAGTGCCCGTGCGTTGC    | 0   | 10  | RDR2-sensitive |
| ACTAGGTTGTTCCGGCCAATGGTA    | 0   | 118 | RDR2-sensitive |
| ACTAGGTTTTAGGGATTGTTCCGT    | 0   | 9   | RDR2-sensitive |
| ACTAGTCATCGGACCATGCCGGCA    | 0   | 13  | RDR2-sensitive |
| ACTAGTCCAGGCTGAAGCTAGCAT    | 0   | 11  | RDR2-sensitive |
| ACTAGTCGACTGATCGGTGGCAAT    | 0   | 10  | RDR2-sensitive |
| ACTAGTCGGTTGCCCGTGCGTTGC    | 0   | 12  | RDR2-sensitive |
| ACTAGTCGTTAGGATCCTCGGGTC    | 2   | 26  | RDR2-sensitive |
| ACTAGTCTTTAGAGAACTGCATG     | 231 | 30  | RDR2-resistant |
| ACTAGTGCCTGCAGATTCGGTGAG    | 15  | 0   | RDR2-resistant |
| ACTAGTTGTTCTGAAAGACGCATC    | 0   | 17  | RDR2-sensitive |
| ACTATAATATCGTCCGTAGATGGC    | 0   | 9   | RDR2-sensitive |
| ACTATACTAGTCGGGTCAGGTCAT    | 0   | 14  | RDR2-sensitive |
| ACTATAGACGACTGCTGACGGCGC    | 0   | 11  | RDR2-sensitive |
| ACTATAGACGGCTGCTGACGGCCC    | 0   | 15  | RDR2-sensitive |
| ACTATAGACGGCTGCTGACGGTCC    | 1   | 29  | RDR2-sensitive |
| ACTATAGCGTAGTGACTIONGAGTCGT | 0   | 37  | RDR2-sensitive |

|                            |    |    |                |
|----------------------------|----|----|----------------|
| ACTATAGTCTGATTGTAGGTGGTA   | 1  | 14 | RDR2-sensitive |
| ACTATATCAAGGACTATGGCGTCA   | 0  | 13 | RDR2-sensitive |
| ACTATATCATGGACTGTGACGTCA   | 0  | 14 | RDR2-sensitive |
| ACTATATCGTCGACTTATGGTGTG   | 0  | 10 | RDR2-sensitive |
| ACTATATTAAGGCTGTAAGGGGTA   | 0  | 11 | RDR2-sensitive |
| ACTATCGCGGACCGTCCGGCCTAA   | 1  | 14 | RDR2-sensitive |
| ACTATCGCGTTATGGTCGTCGGTA   | 1  | 18 | RDR2-sensitive |
| ACTATCGTCGCGCGGCTTCGCCAC   | 0  | 10 | RDR2-sensitive |
| ACTATCGTTGTATGTAGAGATGGC   | 0  | 21 | RDR2-sensitive |
| ACTATCGTTTTGGGCCATATTTCCGG | 21 | 0  | RDR2-resistant |
| ACTATCTGTACAGAGCGGCCTGAT   | 1  | 26 | RDR2-sensitive |
| ACTATGATTGTGGAGGATCGTTGT   | 0  | 18 | RDR2-sensitive |
| ACTATGCGACTGTCAGAAGGTGAC   | 0  | 12 | RDR2-sensitive |
| ACTATGCTAGTAGCAAGGTCTCGG   | 0  | 16 | RDR2-sensitive |
| ACTATGGCTGCAGAGGATCGTTGT   | 0  | 12 | RDR2-sensitive |
| ACTATGGTTGCCGAGGATCGTTGT   | 1  | 18 | RDR2-sensitive |
| ACTATGGTTGTAGAGGATCGTTGT   | 0  | 15 | RDR2-sensitive |
| ACTATTAACGGATCGTGCTTCGG    | 0  | 23 | RDR2-sensitive |
| ACTATTACCTTTATTGTTGGACAA   | 21 | 0  | RDR2-resistant |
| ACTATTGAAGACGGTCTAAGGCTG   | 0  | 9  | RDR2-sensitive |
| ACTATTGCGGATCGTCTGGCCCAG   | 0  | 12 | RDR2-sensitive |
| ACTATTGTTGGTCTGTGATGATGG   | 0  | 11 | RDR2-sensitive |
| ACTATTTCTGTAGTGTTTTGGTCT   | 0  | 10 | RDR2-sensitive |
| ACTATTTCTGTAGTGTTTTGTCTC   | 0  | 22 | RDR2-sensitive |
| ACTATTTGGACCAGGCCGAATCGG   | 0  | 11 | RDR2-sensitive |
| ACTATTTTCTGTTCCGATTGTCCG   | 0  | 10 | RDR2-sensitive |
| ACTCAACACGCAAACCGTCCGGAC   | 0  | 19 | RDR2-sensitive |
| ACTCAACGTTTAGACTCGCTCGGT   | 0  | 11 | RDR2-sensitive |
| ACTCAAGACGCCTCTGAACGACGG   | 1  | 32 | RDR2-sensitive |
| ACTCAATACTGGACTGGATTGGTT   | 0  | 12 | RDR2-sensitive |
| ACTCACTCGCGAGTCTGTCCGGAT   | 0  | 14 | RDR2-sensitive |
| ACTCAGAACTGGTACGGACAAGGG   | 19 | 1  | RDR2-resistant |
| ACTCAGACAAGCAGAGTCGAACGC   | 0  | 14 | RDR2-sensitive |
| ACTCAGACTGTCCGTGCACACCGA   | 0  | 10 | RDR2-sensitive |
| ACTCAGAGGTGTAGAGAAGGCATG   | 0  | 17 | RDR2-sensitive |
| ACTCAGAGGTGTAGAGACGACATG   | 0  | 10 | RDR2-sensitive |
| ACTCAGCATAGACGGACGCTCGAC   | 0  | 9  | RDR2-sensitive |
| ACTCAGCCTGTAGTGTCGGCCCCAG  | 2  | 39 | RDR2-sensitive |
| ACTCAGCGAACTGACTGCTCTCGG   | 0  | 10 | RDR2-sensitive |
| ACTCAGCTCGGGCGAGACGGACAG   | 0  | 11 | RDR2-sensitive |
| ACTCAGGACCACTGAACCGGACGT   | 0  | 9  | RDR2-sensitive |
| ACTCAGGACCCTAGCAACAGGCAA   | 0  | 17 | RDR2-sensitive |
| ACTCAGGATCTAGAAAGTGACGGA   | 0  | 17 | RDR2-sensitive |
| ACTCAGTAGACGACTCGGATGAAC   | 0  | 9  | RDR2-sensitive |
| ACTCATATTCAGTGTAGCGGCATG   | 0  | 10 | RDR2-sensitive |
| ACTCATCGGATACGGGACGGATAC   | 0  | 10 | RDR2-sensitive |
| ACTCATCGGCTACAAATGGGCATT   | 0  | 30 | RDR2-sensitive |
| ACTCATCGTTGAAGTGGGAGGGCT   | 0  | 22 | RDR2-sensitive |
| ACTCATCTGGACAGGGGCACGCAG   | 0  | 20 | RDR2-sensitive |



|                           |    |    |                |
|---------------------------|----|----|----------------|
| ACTCATCTGGGCAGGGACACGCAA  | 0  | 19 | RDR2-sensitive |
| ACTCATCTGGGCTGGGGCACGCGG  | 0  | 11 | RDR2-sensitive |
| ACTCATGACCTATCGGACTAGGCC  | 0  | 12 | RDR2-sensitive |
| ACTCATGTCGCATCGCACGGACAC  | 0  | 19 | RDR2-sensitive |
| ACTCATGTCTGTTGGATGGTTTGA  | 19 | 0  | RDR2-resistant |
| ACTCATTGGACTGGCACGACACGA  | 0  | 9  | RDR2-sensitive |
| ACTCCAAAACCTCTGGATGGAGCAG | 0  | 10 | RDR2-sensitive |
| ACTCCAAAACCTCTGGGTGGAGCAG | 0  | 10 | RDR2-sensitive |
| ACTCCAACAATAGATTGATTCGGT  | 0  | 9  | RDR2-sensitive |
| ACTCCACCGGACGAGGCCGAGGCAA | 1  | 63 | RDR2-sensitive |
| ACTCCATGTAGTGCTCGTTAGAAG  | 0  | 18 | RDR2-sensitive |
| ACTCCCGTCGCAACGCACAGGCAC  | 0  | 9  | RDR2-sensitive |
| ACTCCCGTCGCAACGCACGGACAT  | 0  | 11 | RDR2-sensitive |
| ACTCCGAGGCTGTCAGAGAGACGT  | 0  | 13 | RDR2-sensitive |
| ACTCCGCACGGACTGTTTCGGTGAT | 0  | 15 | RDR2-sensitive |
| ACTCCGCTATAATTCACCGGACTG  | 0  | 10 | RDR2-sensitive |
| ACTCCGGACGAGAGACGCAGTCAC  | 0  | 22 | RDR2-sensitive |
| ACTCCGGGTCTCTGTTTTATAGACG | 0  | 12 | RDR2-sensitive |
| ACTCCGTCGGCTACGTTAGTCGGT  | 19 | 1  | RDR2-resistant |
| ACTCCGTGTGGCTTCTGACGGAT   | 0  | 23 | RDR2-sensitive |
| ACTCCTCACGAGGATCAGGATCTG  | 0  | 9  | RDR2-sensitive |
| ACTCCTCGGTATGTATGTGGGCTA  | 1  | 13 | RDR2-sensitive |
| ACTCCTGGCAGAACCGTGCACCAT  | 0  | 26 | RDR2-sensitive |
| ACTCCTTCGGACTCTGCCAACGGA  | 0  | 12 | RDR2-sensitive |
| ACTCCTTGGACTACGGCGAACACG  | 0  | 24 | RDR2-sensitive |
| ACTCGACGAGCTGGGCAGAGCAGA  | 0  | 9  | RDR2-sensitive |
| ACTCGACGGACCAAGTATGCCGGT  | 1  | 20 | RDR2-sensitive |
| ACTCGACTCGTGGATCCGATCGGC  | 1  | 26 | RDR2-sensitive |
| ACTCGACTGGACACTCGCGGCCCA  | 0  | 9  | RDR2-sensitive |
| ACTCGATCGTAGCAGCGTGACGTA  | 0  | 19 | RDR2-sensitive |
| ACTCGATCGTGGATTATGATGGT   | 0  | 20 | RDR2-sensitive |
| ACTCGATCTGAAGACCCTGACGGT  | 0  | 9  | RDR2-sensitive |
| ACTCGATTCAATCGTCTGCTTCT   | 65 | 0  | RDR2-resistant |
| ACTCGCAGCCTGCAGCAACGGACG  | 1  | 13 | RDR2-sensitive |
| ACTCGCATTCTGTCGGGTTCGGTAT | 0  | 14 | RDR2-sensitive |
| ACTCGCGACAGACGGAACAGATGC  | 0  | 26 | RDR2-sensitive |
| ACTCGCGAGTCGGAACGAGTTGGC  | 0  | 11 | RDR2-sensitive |
| ACTCGCGAGTCTTGTCGGATCGGA  | 0  | 11 | RDR2-sensitive |
| ACTCGCGTAGGACAGTTCGGCTAG  | 0  | 18 | RDR2-sensitive |
| ACTCGCGTGGATTGTGGTGGGTTG  | 0  | 9  | RDR2-sensitive |
| ACTCGCTACCTACTCTGGGCCGGA  | 0  | 15 | RDR2-sensitive |
| ACTCGCTTACGTTGGATCTGGCTA  | 0  | 15 | RDR2-sensitive |
| ACTCGGAACCCGGACTGTTCCGGCC | 0  | 13 | RDR2-sensitive |
| ACTCGGAAGCGACACACGTCTGGA  | 0  | 18 | RDR2-sensitive |
| ACTCGGAAGGAGGCTAGTAGGAAC  | 0  | 13 | RDR2-sensitive |
| ACTCGGACCACCTGCCACGTTCGAC | 1  | 18 | RDR2-sensitive |
| ACTCGGACCAGAATACCACAGCAT  | 0  | 9  | RDR2-sensitive |
| ACTCGGACCAGGCCCAAACAGCGG  | 0  | 12 | RDR2-sensitive |
| ACTCGGAGCCACAAGCCATGACGT  | 0  | 29 | RDR2-sensitive |

|                           |   |    |                |
|---------------------------|---|----|----------------|
| ACTCGGAGCCATAGATCACGGCGT  | 0 | 9  | RDR2-sensitive |
| ACTCGGATGGAAGGTCAACGACGG  | 0 | 16 | RDR2-sensitive |
| ACTCGGCAAACGTGTACATCGGCAA | 2 | 17 | RDR2-sensitive |
| ACTCGGCAAACGTGTATATCGGTAA | 0 | 9  | RDR2-sensitive |
| ACTCGGCAAAGAACACTCGGCAAA  | 2 | 33 | RDR2-sensitive |
| ACTCGGCAAAGAACCTAAGCCGGT  | 0 | 13 | RDR2-sensitive |
| ACTCGGCAAAGAACCTATAACCGGT | 0 | 13 | RDR2-sensitive |
| ACTCGGCAAAGAACGCGATTCCGG  | 0 | 40 | RDR2-sensitive |
| ACTCGGCAAAGAACGCTCGGCGAA  | 2 | 28 | RDR2-sensitive |
| ACTCGGCAAAGAAGGCACACCTGG  | 0 | 9  | RDR2-sensitive |
| ACTCGGCAAAGAAGGCTCGGCAAA  | 2 | 26 | RDR2-sensitive |
| ACTCGGCAAAGACGCTGTCTCCGT  | 1 | 21 | RDR2-sensitive |
| ACTCGGCAAAGACTGACGGCCGTC  | 2 | 15 | RDR2-sensitive |
| ACTCGGCAAAGATTCATCGGCAA   | 9 | 40 | RDR2-sensitive |
| ACTCGGCAAAGCCTCGGATTCCGG  | 0 | 13 | RDR2-sensitive |
| ACTCGGCAAAGGCTATTTTACT    | 5 | 24 | RDR2-sensitive |
| ACTCGGCAAAGGGACTGGCAAAGG  | 0 | 9  | RDR2-sensitive |
| ACTCGGCAAAGTCTCGGATTCCGG  | 2 | 27 | RDR2-sensitive |
| ACTCGGCACAACCAAGCACTCGGC  | 0 | 16 | RDR2-sensitive |
| ACTCGGCACAGAAACACACTCGGC  | 0 | 10 | RDR2-sensitive |
| ACTCGGCACAGAAAGACACTCGGC  | 0 | 9  | RDR2-sensitive |
| ACTCGGCACAGAACGACACTCGGC  | 1 | 23 | RDR2-sensitive |
| ACTCGGCACAGAACGGCACTCGGC  | 3 | 50 | RDR2-sensitive |
| ACTCGGCACAGAAATGATCGGCGAA | 0 | 17 | RDR2-sensitive |
| ACTCGGCACAGAGAAACACTCGGC  | 0 | 12 | RDR2-sensitive |
| ACTCGGCACAGCCAAGCACTCGGC  | 4 | 54 | RDR2-sensitive |
| ACTCGGCACAGCGAAGCACTCGGC  | 0 | 12 | RDR2-sensitive |
| ACTCGGCACAGCTTCAGACGTCAG  | 0 | 10 | RDR2-sensitive |
| ACTCGGCACAGGAAAACCCTCGGC  | 0 | 9  | RDR2-sensitive |
| ACTCGGCACAGGACAACACTCGGC  | 1 | 22 | RDR2-sensitive |
| ACTCGGCACAGGACAGCACTCGGC  | 0 | 9  | RDR2-sensitive |
| ACTCGGCACAGGACCACACTCGGC  | 4 | 20 | RDR2-sensitive |
| ACTCGGCACAGGACCCCACTCGGC  | 4 | 31 | RDR2-sensitive |
| ACTCGGCACAGGACGACACTCGGC  | 2 | 48 | RDR2-sensitive |
| ACTCGGCACAGGACGGCACTCGGC  | 3 | 29 | RDR2-sensitive |
| ACTCGGCACAGGGCGCACTCGGC   | 0 | 18 | RDR2-sensitive |
| ACTCGGCACAGGGCGGCACTCGGC  | 0 | 14 | RDR2-sensitive |
| ACTCGGCACAGGTAGGCACTCGGC  | 1 | 33 | RDR2-sensitive |
| ACTCGGCACATCCAAGCACTCGGC  | 1 | 14 | RDR2-sensitive |
| ACTCGGCACCGAACGGCACTCGGC  | 0 | 10 | RDR2-sensitive |
| ACTCGGCACCGTAGATCATGGCGC  | 0 | 11 | RDR2-sensitive |
| ACTCGGCACGGGCAGACTTCGGGT  | 0 | 10 | RDR2-sensitive |
| ACTCGGCACTCATAGACGGATCTC  | 0 | 10 | RDR2-sensitive |
| ACTCGGCACTCTCGGCAACCGCGC  | 3 | 20 | RDR2-sensitive |
| ACTCGGCAGAGGACAGCACTCGGC  | 0 | 15 | RDR2-sensitive |
| ACTCGGCAGCAGGAGGAGGACTC   | 0 | 11 | RDR2-sensitive |
| ACTCGGCAGCAGTAGGAGGAGCTC  | 0 | 11 | RDR2-sensitive |
| ACTCGGCAGCGGTAGAAGGGGCTC  | 0 | 28 | RDR2-sensitive |
| ACTCGGCATAGAAAGACGCTCGAC  | 0 | 9  | RDR2-sensitive |

|                            |     |     |                |
|----------------------------|-----|-----|----------------|
| ACTCGGCATAGACACACACTCGGC   | 0   | 9   | RDR2-sensitive |
| ACTCGGCATAGGTAGACACTCGGC   | 1   | 17  | RDR2-sensitive |
| ACTCGGCATGCTGCAGCCATCTGC   | 0   | 11  | RDR2-sensitive |
| ACTCGGCCAGTAATACAGACGTT    | 0   | 18  | RDR2-sensitive |
| ACTCGGCCAACTATACATCGGCAA   | 0   | 11  | RDR2-sensitive |
| ACTCGGCCAACTGTACATCGGCAA   | 3   | 28  | RDR2-sensitive |
| ACTCGGCCACTGCACGGCGAACGC   | 0   | 22  | RDR2-sensitive |
| ACTCGGCCGTGTCGACCCTTCGGCT  | 0   | 43  | RDR2-sensitive |
| ACTCGGCTACGACGGTGA CT CGGC | 0   | 13  | RDR2-sensitive |
| ACTCGGCTATAATTCACCGGACTG   | 2   | 18  | RDR2-sensitive |
| ACTCGGCTCGGCTCGAAGCGGCTC   | 70  | 1   | RDR2-resistant |
| ACTCGGCTCGGCTCGGATCGGCTC   | 0   | 10  | RDR2-sensitive |
| ACTCGGCTGGCTGACGAAGAGACA   | 1   | 60  | RDR2-sensitive |
| ACTCGGGACAAGTTCGATGACCGC   | 0   | 12  | RDR2-sensitive |
| ACTCGGTAAGCTAGGCTCTCGGC    | 0   | 11  | RDR2-sensitive |
| ACTCGGTACAGGTCCACACTCGGC   | 1   | 12  | RDR2-sensitive |
| ACTCGGTCAGCTAGTGAGAGGTTT   | 0   | 29  | RDR2-sensitive |
| ACTCGGTCAGTCGGTGC GGCGATT  | 1   | 17  | RDR2-sensitive |
| ACTCGGTGAACTG TAAATCGGCAA  | 0   | 15  | RDR2-sensitive |
| ACTCGTACAGTAGGAAGTGAGGCG   | 0   | 13  | RDR2-sensitive |
| ACTCGTACGTGTTAGCCTTCGGTA   | 1   | 17  | RDR2-sensitive |
| ACTCGTACTCGTAGATAGAGGCTT   | 227 | 47  | RDR2-resistant |
| ACTCGTAGTACTATGGCACGACAT   | 0   | 27  | RDR2-sensitive |
| ACTCGTATGGACTATTGGTGTCTG   | 0   | 10  | RDR2-sensitive |
| ACTCGTCACTGTAAACCCGATGGTG  | 0   | 10  | RDR2-sensitive |
| ACTCGTCAGGCAAAAAGTGTGGCAA  | 0   | 10  | RDR2-sensitive |
| ACTCGTGGGTCTGTTATTGGGCAA   | 4   | 25  | RDR2-sensitive |
| ACTCGTGGTCAGCTCGGCTCGGCT   | 0   | 10  | RDR2-sensitive |
| ACTCGTGGTCAGTTCGGCTCGGCT   | 0   | 10  | RDR2-sensitive |
| ACTCGTTAATGGATCAGGTCGGGC   | 0   | 10  | RDR2-sensitive |
| ACTCGTTATAGCGTACTGTGGCAT   | 0   | 28  | RDR2-sensitive |
| ACTCGTTTGGCACGGCTTCTCCAA   | 0   | 11  | RDR2-sensitive |
| ACTCGTTTGGCACGGCTTCTCTAG   | 1   | 28  | RDR2-sensitive |
| ACTCTAAA ACTCTGGGTGGAGCAG  | 5   | 126 | RDR2-sensitive |
| ACTCTAAATCGAGGGTAGACTGCT   | 0   | 18  | RDR2-sensitive |
| ACTCTAAGACACA ACTTAAGACAC  | 0   | 11  | RDR2-sensitive |
| ACTCTAAGAGTTAGGACTGGGCAT   | 0   | 18  | RDR2-sensitive |
| ACTCTAAGCTCGTCGGTTGGCATG   | 0   | 11  | RDR2-sensitive |
| ACTCTACAGCAGGACTGCTCTACC   | 0   | 11  | RDR2-sensitive |
| ACTCTACATCGGACCACAGAGAGG   | 0   | 10  | RDR2-sensitive |
| ACTCTACCGGACAAGACAGTGGCG   | 1   | 94  | RDR2-sensitive |
| ACTCTACGGGCTGATTTGGTG GTA  | 0   | 9   | RDR2-sensitive |
| ACTCTAGAGCGTATTGGACGGTTG   | 0   | 63  | RDR2-sensitive |
| ACTCTATACTACTAGGTTGTTCCG   | 0   | 16  | RDR2-sensitive |
| ACTCTATCAGTCCGTCGGGCGGCA   | 0   | 23  | RDR2-sensitive |
| ACTCTATCATCAGCTTGGGACAGC   | 29  | 1   | RDR2-resistant |
| ACTCTATCCCGGTGTGGAACGGTT   | 0   | 15  | RDR2-sensitive |
| ACTCTATCTCTGTAGCGTTCGGCA   | 0   | 41  | RDR2-sensitive |
| ACTCTATGGGCTGTCTGATGGCAA   | 0   | 26  | RDR2-sensitive |

|                           |     |     |                |
|---------------------------|-----|-----|----------------|
| ACTCTATTGGATGGAAGATGTATG  | 0   | 27  | RDR2-sensitive |
| ACTCTCAACTGTAGCGGTGTGGTA  | 0   | 14  | RDR2-sensitive |
| ACTCTCAGCAGGTACGACGGACAT  | 0   | 110 | RDR2-sensitive |
| ACTCTCAGCGAACTGTACATCGGC  | 0   | 48  | RDR2-sensitive |
| ACTCTCCACATTTAGCAACTCGGT  | 0   | 13  | RDR2-sensitive |
| ACTCTCCCGTTGCAGTGGACATGA  | 24  | 0   | RDR2-resistant |
| ACTCTCCGCGCGCTGTAGAAGGCA  | 0   | 9   | RDR2-sensitive |
| ACTCTCGGCAAAGGAACAGGCAAA  | 0   | 13  | RDR2-sensitive |
| ACTCTCGGGCCATACACGACACAA  | 0   | 11  | RDR2-sensitive |
| ACTCTCGTCATGGCGTACTGTCCC  | 0   | 9   | RDR2-sensitive |
| ACTCTCGTGGATGACGCTGGTATT  | 0   | 9   | RDR2-sensitive |
| ACTCTCTATGACAGCGCGGACGGT  | 0   | 11  | RDR2-sensitive |
| ACTCTCTCTCTCGGACTCGGTCAA  | 0   | 25  | RDR2-sensitive |
| ACTCTCTCTGCAGGATGACTCTCA  | 124 | 6   | RDR2-resistant |
| ACTCTCTGCGCAGGGGCGGACTGT  | 0   | 22  | RDR2-sensitive |
| ACTCTCTGCGCTATTGTAGACGGT  | 0   | 23  | RDR2-sensitive |
| ACTCTCTGCTCAGAGACGGACGGT  | 0   | 10  | RDR2-sensitive |
| ACTCTCTGGTCAGGCGCGGACGGT  | 0   | 17  | RDR2-sensitive |
| ACTCTCTGTAGCGGTTCCGGACGGT | 1   | 19  | RDR2-sensitive |
| ACTCTCTGTGGAGGCACGGACGGT  | 0   | 10  | RDR2-sensitive |
| ACTCTCTGTGGCGGCACGAACGGT  | 0   | 11  | RDR2-sensitive |
| ACTCTGAATTTCTGGACAAGAGGA  | 0   | 11  | RDR2-sensitive |
| ACTCTGACCTGACGAACGACACGT  | 0   | 9   | RDR2-sensitive |
| ACTCTGACGGAGACTGTCTACTGC  | 3   | 16  | RDR2-sensitive |
| ACTCTGACTCAGATTATGCCGGTT  | 39  | 4   | RDR2-resistant |
| ACTCTGACTCGGGCTAGACTGCTC  | 0   | 12  | RDR2-sensitive |
| ACTCTGATCTTCGTATTTGTGCAT  | 0   | 9   | RDR2-sensitive |
| ACTCTGCAGATCTCCCGAAGAGGC  | 1   | 15  | RDR2-sensitive |
| ACTCTGCAGGTAGAGCTGTACGGG  | 0   | 44  | RDR2-sensitive |
| ACTCTGCATGTAGAGCTGTACGGG  | 0   | 21  | RDR2-sensitive |
| ACTCTGCCTGTTGACGCAACACTG  | 0   | 23  | RDR2-sensitive |
| ACTCTGCGAGACGGACCGACTGAC  | 0   | 9   | RDR2-sensitive |
| ACTCTGCTAGTGGACCCGTGGGAT  | 0   | 21  | RDR2-sensitive |
| ACTCTGCTCGGACCGAGACGAGGC  | 1   | 54  | RDR2-sensitive |
| ACTCTGGACCAGACTCTACAGGCG  | 0   | 66  | RDR2-sensitive |
| ACTCTGGACCCTTCAGACGAACAT  | 0   | 9   | RDR2-sensitive |
| ACTCTGGATTAGAGCTGCTTCACC  | 0   | 9   | RDR2-sensitive |
| ACTCTGGTCACTGTTACGGCACT   | 564 | 8   | RDR2-resistant |
| ACTCTGGTCCTTGCTGACGAACGT  | 0   | 26  | RDR2-sensitive |
| ACTCTGGTCGTGCGGGTTGGGCAG  | 0   | 16  | RDR2-sensitive |
| ACTCTGGTGGTCGGGAGGAGCGT   | 0   | 19  | RDR2-sensitive |
| ACTCTGTAGCAAAGCACGGACATA  | 0   | 13  | RDR2-sensitive |
| ACTCTGTAGCAACGCACGAGCATA  | 0   | 9   | RDR2-sensitive |
| ACTCTGTAGCAACGCACGGGCATA  | 0   | 13  | RDR2-sensitive |
| ACTCTGTAGCAACGCACGGGCATT  | 0   | 52  | RDR2-sensitive |
| ACTCTGTAGCAACGCACGGGTATA  | 0   | 11  | RDR2-sensitive |
| ACTCTGTAGCAACGTACGGGCATA  | 0   | 22  | RDR2-sensitive |
| ACTCTGTAGGAAATGCATAGACAG  | 1   | 17  | RDR2-sensitive |
| ACTCTGTATAGGTACGAGGACCGA  | 0   | 12  | RDR2-sensitive |

|                           |    |     |                |
|---------------------------|----|-----|----------------|
| ACTCTGTATCTTAGAACGCGCACA  | 1  | 20  | RDR2-sensitive |
| ACTCTGTGCGTCGGGTCGACAGGC  | 0  | 9   | RDR2-sensitive |
| ACTCTGTTGGATGGAAGATGCATG  | 1  | 173 | RDR2-sensitive |
| ACTCTGTTGGATGTAAGATGCATG  | 0  | 10  | RDR2-sensitive |
| ACTCTGTTGGGTGGAAGATGCATG  | 0  | 12  | RDR2-sensitive |
| ACTCTGTTTGGTTGTAGGGGCTAA  | 0  | 10  | RDR2-sensitive |
| ACTCTTAGAGGTATCGTTGTGCTG  | 77 | 3   | RDR2-resistant |
| ACTCTTGAACCCCTCGGATGGTTG  | 26 | 0   | RDR2-resistant |
| ACTCTTGACGTGTAGAGGACGAGA  | 0  | 17  | RDR2-sensitive |
| ACTCTTGGATGAGGCACTGATGGT  | 33 | 2   | RDR2-resistant |
| ACTCTTGGCGTGA CTGGCGACCT  | 2  | 30  | RDR2-sensitive |
| ACTCTTGTGGGATCTGACGTGCAC  | 0  | 9   | RDR2-sensitive |
| ACTCTTTAACCGGACCGGACGCAT  | 1  | 19  | RDR2-sensitive |
| ACTCTTTAGGGTGTATTGCTGGAG  | 0  | 15  | RDR2-sensitive |
| ACTCTTTTAGTGGACCCGGGGATA  | 0  | 10  | RDR2-sensitive |
| ACTCTTTTGGGTCAGGGCTGGGCT  | 0  | 9   | RDR2-sensitive |
| ACTGAAATGTAGGATCGGACGGCT  | 0  | 11  | RDR2-sensitive |
| ACTGAACAGTCCGCCGGGTGGCAT  | 0  | 10  | RDR2-sensitive |
| ACTGAACCCTAGCACTCCGGATTT  | 0  | 12  | RDR2-sensitive |
| ACTGAACCTGAACTAGGAGACCCT  | 0  | 9   | RDR2-sensitive |
| ACTGAACCTGCAGCAGTAGCTTAG  | 0  | 13  | RDR2-sensitive |
| ACTGAACCTGTCAGGAAGCTGCTG  | 0  | 11  | RDR2-sensitive |
| ACTGAACGAAGGGAGCCGAGCCGT  | 1  | 70  | RDR2-sensitive |
| ACTGAACGGATTTAGACGACGTAG  | 0  | 9   | RDR2-sensitive |
| ACTGAACTAGAGCTCCGGCCGGAA  | 1  | 21  | RDR2-sensitive |
| ACTGAAGACTGCAGCGGGCGACGC  | 0  | 19  | RDR2-sensitive |
| ACTGAAGAGGATTGGAGAGGCTAG  | 0  | 15  | RDR2-sensitive |
| ACTGAAGCCGGCGGAGGAGAGCAT  | 0  | 12  | RDR2-sensitive |
| ACTGAAGGATTACGGGGAGGCTAC  | 25 | 2   | RDR2-resistant |
| ACTGAAGGCTGCGCAGAAGTCAAA  | 3  | 22  | RDR2-sensitive |
| ACTGAAGGGCAGCAAGGCACTGGC  | 0  | 9   | RDR2-sensitive |
| ACTGAATCTTCGCACGCACGGACC  | 0  | 10  | RDR2-sensitive |
| ACTGAATGTAGGGACGTTCTGCCC  | 0  | 13  | RDR2-sensitive |
| ACTGACACAGGCGGAACTGACACG  | 0  | 11  | RDR2-sensitive |
| ACTGACACGCGGGACTGAGCAGGA  | 0  | 9   | RDR2-sensitive |
| ACTGACACGTAGGAGGCGCTGTAG  | 0  | 16  | RDR2-sensitive |
| ACTGACACTGCAAGCAGCTGGATA  | 0  | 10  | RDR2-sensitive |
| ACTGACACTGTATGAATCGTGCAC  | 0  | 27  | RDR2-sensitive |
| ACTGACACTGTATGAATCGTGCCT  | 0  | 15  | RDR2-sensitive |
| ACTGACAGGAGCCGAACGTGTCAA  | 0  | 47  | RDR2-sensitive |
| ACTGACCAAGGAGCCGGAGCCTCT  | 0  | 11  | RDR2-sensitive |
| ACTGACCGATTGCCAGTGCTGCAT  | 1  | 15  | RDR2-sensitive |
| ACTGACCGCCTGACAGAAGGACA   | 2  | 35  | RDR2-sensitive |
| ACTGACCGTCTACAGTAGGGCATC  | 0  | 17  | RDR2-sensitive |
| ACTGACCTCTAGAACC GATGGCTC | 1  | 46  | RDR2-sensitive |
| ACTGACCTGCTGAGATTTTATATT  | 14 | 0   | RDR2-resistant |
| ACTGACGACTGTTGGCTCACCGGA  | 0  | 16  | RDR2-sensitive |
| ACTGACGCGACCTGACATGGCATT  | 1  | 15  | RDR2-sensitive |
| ACTGACGGATGACGTGGTCTAGCT  | 0  | 29  | RDR2-sensitive |

|                           |     |    |                |
|---------------------------|-----|----|----------------|
| ACTGACGGCAAGATAACGGGCTCT  | 0   | 10 | RDR2-sensitive |
| ACTGACGGCCGTGACTCTGGGAC   | 1   | 32 | RDR2-sensitive |
| ACTGACGGCTGACGGCGAGTGGAC  | 1   | 27 | RDR2-sensitive |
| ACTGACGTAGACTGTGACACGGAT  | 0   | 10 | RDR2-sensitive |
| ACTGACGTGGCACGTAACCTCGGCG | 0   | 9  | RDR2-sensitive |
| ACTGACGTTGTGCGCAGTAGACGAG | 5   | 37 | RDR2-sensitive |
| ACTGACTAAGCTCGGCTCACCTAC  | 1   | 17 | RDR2-sensitive |
| ACTGACTAGGGTAGAGACTGGTAT  | 0   | 12 | RDR2-sensitive |
| ACTGACTAGTGACCCAAGGACATA  | 0   | 10 | RDR2-sensitive |
| ACTGACTAGTGACCTAAGGACATA  | 0   | 9  | RDR2-sensitive |
| ACTGACTCTGCTCATGCGTGGACC  | 0   | 15 | RDR2-sensitive |
| ACTGACTGGCAGACTGACCTGCAG  | 1   | 12 | RDR2-sensitive |
| ACTGACTGTATGTTTTAGTACGG   | 0   | 12 | RDR2-sensitive |
| ACTGACTTAGACGGATTTAGATAA  | 1   | 26 | RDR2-sensitive |
| ACTGACTTCGTCTATGTGTGGCAA  | 0   | 14 | RDR2-sensitive |
| ACTGACTTTATTTGGCATCTCTT   | 40  | 2  | RDR2-resistant |
| ACTGAGACACGTGGAAGACATCAT  | 0   | 12 | RDR2-sensitive |
| ACTGAGACGGAGGACGAGAGTCAG  | 0   | 19 | RDR2-sensitive |
| ACTGAGAGCTCTTTCTTGATTCTA  | 34  | 1  | RDR2-resistant |
| ACTGAGCACGGCCTGACAGTCTGA  | 0   | 9  | RDR2-sensitive |
| ACTGAGCCTGACACGACATAGTTA  | 0   | 14 | RDR2-sensitive |
| ACTGAGCGGGCTTCATGACCGGTG  | 0   | 30 | RDR2-sensitive |
| ACTGAGCGGTCGCATACCCTGCAT  | 0   | 20 | RDR2-sensitive |
| ACTGAGCGTAGTACACTTGGCATA  | 1   | 27 | RDR2-sensitive |
| ACTGAGGCTTTGATACCAGATGAT  | 0   | 26 | RDR2-sensitive |
| ACTGAGGGTAGCACACTCGGCATA  | 0   | 18 | RDR2-sensitive |
| ACTGATAAGCTGCTGCAGAAGCTG  | 0   | 10 | RDR2-sensitive |
| ACTGATACGATTGGACACGGCCTA  | 0   | 10 | RDR2-sensitive |
| ACTGATACGATTGGACACGGCCTG  | 0   | 16 | RDR2-sensitive |
| ACTGATACGATTGGACACGGCCTT  | 0   | 11 | RDR2-sensitive |
| ACTGATAGATGGCGTAGACCGGAA  | 1   | 14 | RDR2-sensitive |
| ACTGATCACGGCTAGACGGTTCGC  | 0   | 11 | RDR2-sensitive |
| ACTGATCGATGGCACGCGCCGGAA  | 0   | 18 | RDR2-sensitive |
| ACTGATCGCTTGATAGATGGGCAG  | 0   | 9  | RDR2-sensitive |
| ACTGATCGGACCAACAGACTGGCC  | 0   | 9  | RDR2-sensitive |
| ACTGATCGGTCGGTCAGGTTGGTA  | 0   | 13 | RDR2-sensitive |
| ACTGATGATTTAGTGAACGTTGAT  | 51  | 0  | RDR2-resistant |
| ACTGATGATTTAGTGAATGTTGAC  | 55  | 0  | RDR2-resistant |
| ACTGATGATTTTAGTAGATATGGG  | 31  | 3  | RDR2-resistant |
| ACTGATGCGCAGAACGACGACGAG  | 0   | 9  | RDR2-sensitive |
| ACTGATGGAGGGAGTAGAGGACGA  | 0   | 9  | RDR2-sensitive |
| ACTGATGGGCCCAAGGATCGCGG   | 0   | 11 | RDR2-sensitive |
| ACTGATGGTTGCAATGTAGTGGTG  | 1   | 15 | RDR2-sensitive |
| ACTGATGTTCTTGATTGGTCCGGTC | 107 | 1  | RDR2-resistant |
| ACTGATTAGGGCAGGCTGAGACGC  | 0   | 13 | RDR2-sensitive |
| ACTGATTACGCGTCGGCTTGCCA   | 22  | 0  | RDR2-resistant |
| ACTGATTCTGGACACGCTTGACGG  | 0   | 9  | RDR2-sensitive |
| ACTGATTGGATCGTAGGGGAGCGG  | 0   | 33 | RDR2-sensitive |
| ACTGCAAATAGTACGGACGGTTGA  | 0   | 9  | RDR2-sensitive |

|                           |    |    |                |
|---------------------------|----|----|----------------|
| ACTGCAACGAACCACTTGACGGTG  | 0  | 24 | RDR2-sensitive |
| ACTGCAAGACGCTATATCTGAGGT  | 0  | 13 | RDR2-sensitive |
| ACTGCAAGCGATGACCGTTTTTGG  | 17 | 0  | RDR2-resistant |
| ACTGCACCGGACCCAAGGCGAGCT  | 0  | 15 | RDR2-sensitive |
| ACTGCACCGGATCGGAGGATGTCA  | 0  | 10 | RDR2-sensitive |
| ACTGCACCGGGCCCAAGGCGAGCT  | 0  | 9  | RDR2-sensitive |
| ACTGCACGGTCAACTGAACGCGGT  | 0  | 36 | RDR2-sensitive |
| ACTGCAGACTGAGAAGGCGTCCCA  | 0  | 31 | RDR2-sensitive |
| ACTGCAGAGGATTGTGGTATAGAG  | 0  | 10 | RDR2-sensitive |
| ACTGCAGAGTAGAAGTGTTCGACAG | 0  | 10 | RDR2-sensitive |
| ACTGCAGATCGAGGATTTCCGGCG  | 0  | 11 | RDR2-sensitive |
| ACTGCAGCTGTAGTTGGGCGCTAT  | 0  | 14 | RDR2-sensitive |
| ACTGCAGTCGGAGTGGCGCAGGCG  | 3  | 37 | RDR2-sensitive |
| ACTGCATCGACTCTATACGGCTAT  | 0  | 29 | RDR2-sensitive |
| ACTGCATGCGGAGTGGGATGGGGA  | 1  | 14 | RDR2-sensitive |
| ACTGCATGGACGTGGAGATGGCAC  | 2  | 18 | RDR2-sensitive |
| ACTGCCAAAGCAACTCGACGACGC  | 2  | 28 | RDR2-sensitive |
| ACTGCCAGTTGATCACAGGACAAT  | 0  | 9  | RDR2-sensitive |
| ACTGCCGAGATTAGAACCGACGGG  | 0  | 14 | RDR2-sensitive |
| ACTGCCGCTGTAGACAGAAGATGG  | 0  | 22 | RDR2-sensitive |
| ACTGCCTCATCGCAGCCGTTGGAT  | 0  | 39 | RDR2-sensitive |
| ACTGCCTGGCCTGACTAGAAGCGT  | 0  | 12 | RDR2-sensitive |
| ACTGCGACTGGACACGACGTGGCG  | 0  | 19 | RDR2-sensitive |
| ACTGCGGCTCTGGTGAACGGCGGA  | 0  | 14 | RDR2-sensitive |
| ACTGCGTACTGGAACGCGGCGTCT  | 0  | 12 | RDR2-sensitive |
| ACTGCGTTGAGAACCTGCGGCGAT  | 0  | 21 | RDR2-sensitive |
| ACTGCTAAGAGCCTAGGACGACGG  | 0  | 9  | RDR2-sensitive |
| ACTGCTAGGAGCCTAGGACGACGG  | 0  | 26 | RDR2-sensitive |
| ACTGCTAGGAGCTTAGGACGACGG  | 0  | 13 | RDR2-sensitive |
| ACTGCTCCGGACCAACAGTACAGC  | 0  | 9  | RDR2-sensitive |
| ACTGCTCGGCAGGGATCTGATCGG  | 0  | 25 | RDR2-sensitive |
| ACTGCTCTACTGCATGGTCGTCCG  | 0  | 14 | RDR2-sensitive |
| ACTGCTGACGGGAGGGAAGGGAGC  | 1  | 18 | RDR2-sensitive |
| ACTGCTGACTGTACGGCTGTACCG  | 0  | 14 | RDR2-sensitive |
| ACTGCTGGACTGATGAATAGTGTG  | 0  | 9  | RDR2-sensitive |
| ACTGCTGGAGAGCATAGAGGACCA  | 0  | 44 | RDR2-sensitive |
| ACTGCTGTAGACGGCCTTAGGAGC  | 0  | 17 | RDR2-sensitive |
| ACTGCTGTAGAGGAGCACGAGCGA  | 0  | 14 | RDR2-sensitive |
| ACTGCTGTAGGACTAATCAGTAGA  | 48 | 0  | RDR2-resistant |
| ACTGCTGTTCGCACCTGATGACGTA | 0  | 10 | RDR2-sensitive |
| ACTGCTGTTCGGAGCGCATCTTCAT | 0  | 14 | RDR2-sensitive |
| ACTGGAAAACGAACTCCACGGTGC  | 0  | 14 | RDR2-sensitive |
| ACTGGAAACGTAGAGGACGACCT   | 0  | 9  | RDR2-sensitive |
| ACTGGAACTGCATGCACCGCGAC   | 0  | 12 | RDR2-sensitive |
| ACTGGAACTGCATGGACCGCGGC   | 0  | 11 | RDR2-sensitive |
| ACTGGAACCTAACACTGACGGTTT  | 0  | 17 | RDR2-sensitive |
| ACTGGAACCTGGCTCTGGAGATGC  | 0  | 16 | RDR2-sensitive |
| ACTGGAACGGAACGGCTTCATACC  | 0  | 27 | RDR2-sensitive |
| ACTGGAACGGAGCGGCTCTGTTTT  | 0  | 9  | RDR2-sensitive |

|                           |    |     |                |
|---------------------------|----|-----|----------------|
| ACTGGAACTGGAGCCCGGCCTTGA  | 18 | 0   | RDR2-resistant |
| ACTGGAACTTGGAACTGGATCCGG  | 0  | 19  | RDR2-sensitive |
| ACTGGAAAGGGCATAGCTGAGAAAA | 1  | 49  | RDR2-sensitive |
| ACTGGACAAGCACCTGACGGACAC  | 2  | 28  | RDR2-sensitive |
| ACTGGACAAGCACTGCGCCGCATT  | 0  | 9   | RDR2-sensitive |
| ACTGGACAGGTAAAACGACGGGCT  | 0  | 11  | RDR2-sensitive |
| ACTGGACAGTCCGACGTGTGGCAC  | 0  | 11  | RDR2-sensitive |
| ACTGGACAGTGGATACCCGACGGG  | 0  | 14  | RDR2-sensitive |
| ACTGGACCAGAACGGCTCTTGGCT  | 1  | 17  | RDR2-sensitive |
| ACTGGACCATGCCAGGCTCGGACC  | 1  | 21  | RDR2-sensitive |
| ACTGGACCGCTGTGATCTGTGTT   | 0  | 12  | RDR2-sensitive |
| ACTGGACCGTGTGGTAACGACTAC  | 0  | 18  | RDR2-sensitive |
| ACTGGACCTGTGGTAGACGGGCAA  | 0  | 17  | RDR2-sensitive |
| ACTGGACGACGAGCGCACTCTAAA  | 0  | 14  | RDR2-sensitive |
| ACTGGACGAGAGGGACATGGTCGA  | 0  | 10  | RDR2-sensitive |
| ACTGGACGCCGTGGCGTTGACGTG  | 0  | 21  | RDR2-sensitive |
| ACTGGACGCTCTTCTTCGACGGAT  | 0  | 9   | RDR2-sensitive |
| ACTGGACGGATGGGTTGGATGCAT  | 0  | 16  | RDR2-sensitive |
| ACTGGACGTGTAGAGGACGTATTT  | 0  | 22  | RDR2-sensitive |
| ACTGGACTAGGACGCAAGCCTCAA  | 0  | 19  | RDR2-sensitive |
| ACTGGACTGCTAATTAGGCCGTGT  | 0  | 16  | RDR2-sensitive |
| ACTGGACTGGCTGAGTACATGCAG  | 0  | 16  | RDR2-sensitive |
| ACTGGACTGGCTGAGTGCATGCAA  | 0  | 12  | RDR2-sensitive |
| ACTGGACTGGCTGAGTGCATGCAG  | 0  | 99  | RDR2-sensitive |
| ACTGGACTGTCCGGTACGCCCATC  | 0  | 13  | RDR2-sensitive |
| ACTGGACTGTCCGGTGCGCCCATC  | 0  | 20  | RDR2-sensitive |
| ACTGGACTGTCCGGTGTACATGA   | 0  | 22  | RDR2-sensitive |
| ACTGGAGAGCGTAGAGGACCGTTT  | 0  | 12  | RDR2-sensitive |
| ACTGGAGGCAGAACGCAGAACAGG  | 0  | 28  | RDR2-sensitive |
| ACTGGAGGCAGAACGGCAGAACGG  | 0  | 19  | RDR2-sensitive |
| ACTGGAGTCCGGTATGCCACTGGTC | 0  | 14  | RDR2-sensitive |
| ACTGGAGTGGGTAGGAGAGAGACG  | 0  | 10  | RDR2-sensitive |
| ACTGGATACGAGATTATGATTGGT  | 0  | 14  | RDR2-sensitive |
| ACTGGATGTGCGTGGGTTGACGTA  | 0  | 9   | RDR2-sensitive |
| ACTGGATGTTGGCGAATGCTGGTT  | 17 | 0   | RDR2-resistant |
| ACTGGATTAGACATGCACGCACAA  | 0  | 19  | RDR2-sensitive |
| ACTGGATTCGGGACCGGATACGGA  | 0  | 16  | RDR2-sensitive |
| ACTGGCAAGAGCATTTGACCACGA  | 0  | 11  | RDR2-sensitive |
| ACTGGCACTATACTAGTCGGGTCA  | 0  | 11  | RDR2-sensitive |
| ACTGGCAGCAAGATAATGAGCTAT  | 0  | 22  | RDR2-sensitive |
| ACTGGCAGGAGCATTTGACCACGA  | 0  | 21  | RDR2-sensitive |
| ACTGGCAGTAAGATAATGGGCTAT  | 0  | 12  | RDR2-sensitive |
| ACTGGCATGGTTGTAGGACGGCAG  | 0  | 18  | RDR2-sensitive |
| ACTGGCATGTAAGCAGTAGGACAT  | 1  | 119 | RDR2-sensitive |
| ACTGGCCCCTGTACGCGAGCATG   | 0  | 11  | RDR2-sensitive |
| ACTGGCCCATAGCACTGACGGTTC  | 0  | 9   | RDR2-sensitive |
| ACTGGCCCCGAACCAACAGTAGAAC | 0  | 9   | RDR2-sensitive |
| ACTGGCCCCGTAGCACTGGTGGTTA | 0  | 10  | RDR2-sensitive |
| ACTGGCCTGCTTCAGACGACTCGA  | 1  | 48  | RDR2-sensitive |



|                               |     |    |                |
|-------------------------------|-----|----|----------------|
| ACTGGCCTGGAACAGCAAAGACGC      | 0   | 19 | RDR2-sensitive |
| ACTGGCCTTTAACACTGACGGTTC      | 0   | 23 | RDR2-sensitive |
| ACTGGCCTTTAGAACTAGCGGCAC      | 0   | 41 | RDR2-sensitive |
| ACTGGCGAAGATCGGTGCTCTGGA      | 0   | 10 | RDR2-sensitive |
| ACTGGCTAACGATTCTGACGGCGT      | 1   | 15 | RDR2-sensitive |
| ACTGGCTACAACGGCTTAGGACAT      | 0   | 23 | RDR2-sensitive |
| ACTGGCTACTGTAGTTCACGGGCC      | 0   | 61 | RDR2-sensitive |
| ACTGGCTGGCTGTAACGGTAGCTC      | 0   | 18 | RDR2-sensitive |
| ACTGGCTTTCTGAACAATTGGCTT      | 0   | 11 | RDR2-sensitive |
| ACTGGGACCCTAGAACACGTGGTA      | 0   | 16 | RDR2-sensitive |
| ACTGGGACGGTAGCGGACGACGAA      | 1   | 41 | RDR2-sensitive |
| ACTGGGACGTTGCAGAGTGGACGG      | 0   | 12 | RDR2-sensitive |
| ACTGGGACTGGACAGCAGCTATGC      | 0   | 19 | RDR2-sensitive |
| ACTGGGATGGCAGTGCTTGATCAC      | 3   | 36 | RDR2-sensitive |
| ACTGGGCAGTTGTTGGGCGTCAT       | 0   | 12 | RDR2-sensitive |
| ACTGGGCATGCTCGGACGGTCTAG      | 0   | 11 | RDR2-sensitive |
| ACTGGGCCAAGCCAACCTAGAGCT      | 0   | 9  | RDR2-sensitive |
| ACTGGGCCATGCCAACCTGAGGCT      | 1   | 15 | RDR2-sensitive |
| ACTGGGCCCTAGTACCGACGGTTC      | 0   | 10 | RDR2-sensitive |
| ACTGGGCCTGTAGTGACGTGCGTT      | 0   | 17 | RDR2-sensitive |
| ACTGGGCGCGGCTGGACGGTACGG      | 0   | 10 | RDR2-sensitive |
| ACTGGGCTGAGATTATTAGGTCAT      | 0   | 38 | RDR2-sensitive |
| ACTGGGCTTCTGAAAATCGGTATC      | 1   | 28 | RDR2-sensitive |
| ACTGGGGATAGAGCGCTGCGGGAT      | 0   | 9  | RDR2-sensitive |
| ACTGGGGCACAGGAGAACGCGCGA      | 0   | 9  | RDR2-sensitive |
| ACTGGGGCAGAACGCGGAATGGCC      | 0   | 9  | RDR2-sensitive |
| ACTGGGTCAGACTGTGTAGAGGGA      | 1   | 15 | RDR2-sensitive |
| ACTGGTACAGACTGAGGCTAGCAT      | 0   | 15 | RDR2-sensitive |
| ACTGGTAGGCTCATTAGAAGGGT       | 18  | 1  | RDR2-resistant |
| ACTGGTATCTGGGCTAATGGACGG      | 0   | 16 | RDR2-sensitive |
| ACTGGTCAGGCCCGTCGCATCAAC      | 0   | 16 | RDR2-sensitive |
| ACTGGTCAGGCCTGTGCATCAAC       | 171 | 0  | RDR2-resistant |
| ACTGGTCCAGGCTGAGACTAGCAT      | 0   | 10 | RDR2-sensitive |
| ACTGGTCCTGATGACTGGACGGTC      | 0   | 11 | RDR2-sensitive |
| ACTGGTCGACTGGACTGGGAGGTA      | 0   | 12 | RDR2-sensitive |
| ACTGGTCGCGGACCGTCCGGCCCA      | 0   | 15 | RDR2-sensitive |
| ACTGGTCGCTTGATAGATGGGCAG      | 0   | 9  | RDR2-sensitive |
| ACTGGTCGGTGGTGTATTGGGTTG      | 0   | 10 | RDR2-sensitive |
| ACTGGTCGGTTGACGGTCCTCGCG      | 1   | 15 | RDR2-sensitive |
| ACTGGTGACTIONGGTGTGAGCAGGCAGG | 0   | 12 | RDR2-sensitive |
| ACTGGTGTGCGGGATTGGACGGCT      | 0   | 13 | RDR2-sensitive |
| ACTGGTGTTTCTTAGAATCGTCGG      | 0   | 14 | RDR2-sensitive |
| ACTGGTGTTTCTTAGTACCGTCGG      | 0   | 10 | RDR2-sensitive |
| ACTGGTTAGCCTGATCGATCTGGG      | 0   | 16 | RDR2-sensitive |
| ACTGGTTCCTAACACTGACGGTTA      | 0   | 21 | RDR2-sensitive |
| ACTGGTTCGCACTGGAGGAGGCCA      | 0   | 34 | RDR2-sensitive |
| ACTGGTTCGGATGACGTCAGATAG      | 0   | 13 | RDR2-sensitive |
| ACTGGTCTAGGCCGGGTCGTCAA       | 0   | 71 | RDR2-sensitive |
| ACTGGTTGGTCGTGAGCGGAGGAA      | 0   | 12 | RDR2-sensitive |

|                          |    |     |                |
|--------------------------|----|-----|----------------|
| ACTGGTTTAGGTGCTGTCGGGAAG | 0  | 14  | RDR2-sensitive |
| ACTGGTTTAGTTGATCTCGGATAA | 1  | 13  | RDR2-sensitive |
| ACTGGTTTCGTCGATCTCGGATAA | 2  | 21  | RDR2-sensitive |
| ACTGGTTTGGTCGCTTGGAGGCTA | 0  | 10  | RDR2-sensitive |
| ACTGTAAAATGGACGGTTAGATGG | 0  | 9   | RDR2-sensitive |
| ACTGTAAAATGGACGGTTGGATGG | 0  | 19  | RDR2-sensitive |
| ACTGTAAACGTAGAGAGGCCCTGA | 0  | 14  | RDR2-sensitive |
| ACTGTAAAGGACGGATATAGAAGA | 0  | 13  | RDR2-sensitive |
| ACTGTAAAGGACGGATATAGAGGA | 0  | 38  | RDR2-sensitive |
| ACTGTAAATCGGCAACTACCTCTT | 0  | 9   | RDR2-sensitive |
| ACTGTAATATGGACGGTTGGATGG | 0  | 37  | RDR2-sensitive |
| ACTGTACACGAACGAAGTTGGCGC | 0  | 9   | RDR2-sensitive |
| ACTGTACATCGGCAACAACCTCTT | 3  | 30  | RDR2-sensitive |
| ACTGTACATCGGCAACAACCTCTT | 0  | 9   | RDR2-sensitive |
| ACTGTACATCGGCAACAGCCTCTT | 2  | 139 | RDR2-sensitive |
| ACTGTACATCGGCAACAGCTTCTT | 4  | 25  | RDR2-sensitive |
| ACTGTACATCGGCAACAGTCTCTT | 0  | 11  | RDR2-sensitive |
| ACTGTACATCGGCAACGACTTCTT | 0  | 26  | RDR2-sensitive |
| ACTGTACATCGGCAACGGCCTCTT | 0  | 34  | RDR2-sensitive |
| ACTGTACATCGGCAACGGCTTCTT | 2  | 43  | RDR2-sensitive |
| ACTGTACATCGGCAACTGCTTCTT | 0  | 10  | RDR2-sensitive |
| ACTGTACATCGGCAGCGGTCTCTT | 0  | 17  | RDR2-sensitive |
| ACTGTACTAGGGCACAAGACTGAA | 0  | 13  | RDR2-sensitive |
| ACTGTAGAAGGCTTTTTACTAGGA | 35 | 7   | RDR2-resistant |
| ACTGTAGAAGGCTTTTTACTTGGT | 94 | 5   | RDR2-resistant |
| ACTGTAGACTACACTGTTCCGAGA | 0  | 25  | RDR2-sensitive |
| ACTGTAGACTGTACTGTTCCGAGA | 0  | 19  | RDR2-sensitive |
| ACTGTAGAGTAGGGCTATAGTCTG | 0  | 10  | RDR2-sensitive |
| ACTGTAGATGTAGATCCACTCGGT | 0  | 22  | RDR2-sensitive |
| ACTGTAGCACATGTAGAGGGCACC | 0  | 9   | RDR2-sensitive |
| ACTGTAGCCCACGAGCCGGCCTGA | 0  | 11  | RDR2-sensitive |
| ACTGTAGCTGTAGGGGACGGAATT | 0  | 18  | RDR2-sensitive |
| ACTGTAGGGACACATATGTAGGAT | 0  | 9   | RDR2-sensitive |
| ACTGTAGGTCGGCTTGCCTGCCCA | 0  | 13  | RDR2-sensitive |
| ACTGTATAAATGGACGGTTGGATG | 0  | 11  | RDR2-sensitive |
| ACTGTATACTTGTCGTTCTCGGGC | 0  | 9   | RDR2-sensitive |
| ACTGTATAGAGCGAGATTGAGGCT | 0  | 9   | RDR2-sensitive |
| ACTGTATAGGATGGTATCTCGAAA | 0  | 9   | RDR2-sensitive |
| ACTGTATATCGGCAACGGCTTCTT | 1  | 22  | RDR2-sensitive |
| ACTGTATCAAGGACTATGACGTCA | 0  | 10  | RDR2-sensitive |
| ACTGTATCCGGACAGCCAGGATGG | 0  | 9   | RDR2-sensitive |
| ACTGTATGGAAGAATTTGGTGCAT | 44 | 2   | RDR2-resistant |
| ACTGTATTTTAGGACGGAGGGCGT | 0  | 13  | RDR2-sensitive |
| ACTGTCAGAGTAAGTATCGCTGGT | 0  | 13  | RDR2-sensitive |
| ACTGTCAGCACTCGGCAAAGATGT | 12 | 128 | RDR2-sensitive |
| ACTGTCCACTCTGCAACGGCCCAA | 5  | 57  | RDR2-sensitive |
| ACTGTCCACTCTGCAACGGCTCAA | 0  | 35  | RDR2-sensitive |
| ACTGTCCACTCTGGAACGGCCCAA | 0  | 11  | RDR2-sensitive |
| ACTGTCCCAATATGGCACGGCTGT | 0  | 17  | RDR2-sensitive |

|                           |    |     |                |
|---------------------------|----|-----|----------------|
| ACTGTCCCAATCTGGCGCGGCTGT  | 0  | 47  | RDR2-sensitive |
| ACTGTCCCATAGCTTAGAACGGAT  | 0  | 10  | RDR2-sensitive |
| ACTGTCCGACTGTCAGGCAGGAAA  | 0  | 11  | RDR2-sensitive |
| ACTGTCCGCGACACCGTAGAGGGC  | 0  | 11  | RDR2-sensitive |
| ACTGTCCGGTGAGCCAACGGTCGG  | 0  | 13  | RDR2-sensitive |
| ACTGTCCCTAATCTGACGCGGCTGT | 0  | 19  | RDR2-sensitive |
| ACTGTCCCTGCGGCAACATACTCGG | 7  | 41  | RDR2-sensitive |
| ACTGTCCCTGCGGCAACGTACTCGG | 3  | 28  | RDR2-sensitive |
| ACTGTCGAAGACTGTATTTCCGGT  | 0  | 10  | RDR2-sensitive |
| ACTGTGCGAGACTAAGGCTATCCAC | 0  | 35  | RDR2-sensitive |
| ACTGTGCGAGTGTGGACTGGGTCGG | 0  | 13  | RDR2-sensitive |
| ACTGTGCGGTAGGACAATTCGGCT  | 0  | 18  | RDR2-sensitive |
| ACTGTGCGGTAGGACAGCTCGGCT  | 0  | 16  | RDR2-sensitive |
| ACTGTGCGGTAGGACAGTTCGGCT  | 3  | 71  | RDR2-sensitive |
| ACTGTGCGTTGTACGAGATGGATT  | 0  | 39  | RDR2-sensitive |
| ACTGTGCGGTATGATCATGCGTGCT | 0  | 13  | RDR2-sensitive |
| ACTGTGCGGTCTTCTGTTGGTTGGC | 0  | 11  | RDR2-sensitive |
| ACTGTGCGTAATGTATGTAGCGGTC | 0  | 12  | RDR2-sensitive |
| ACTGTCTACTCTACAACGGCCCAA  | 0  | 9   | RDR2-sensitive |
| ACTGTCTAGCGTGGTTGTTTGAAT  | 31 | 0   | RDR2-resistant |
| ACTGTCTCAATCTGGCGCGGCTGT  | 0  | 9   | RDR2-sensitive |
| ACTGTCTCAGGTCGCGGACGGTCC  | 0  | 21  | RDR2-sensitive |
| ACTGTCTCCGACGAATGACGAGCT  | 0  | 10  | RDR2-sensitive |
| ACTGTCTCGGCTCGTAGTGACGGC  | 0  | 30  | RDR2-sensitive |
| ACTGTCTGAGACGATACGGACGCC  | 0  | 11  | RDR2-sensitive |
| ACTGTCTGGACATGTATGCGGATG  | 0  | 33  | RDR2-sensitive |
| ACTGTCTGGCCTGGGCTTCCAATA  | 0  | 17  | RDR2-sensitive |
| ACTGTGAAACTGCGAATGGCTCAT  | 21 | 0   | RDR2-resistant |
| ACTGTGAACGACGCAACGACGAAC  | 0  | 23  | RDR2-sensitive |
| ACTGTGACCAGCAGTCTGACTCAT  | 0  | 21  | RDR2-sensitive |
| ACTGTGACTGTGGCAGACTGGCTT  | 6  | 239 | RDR2-sensitive |
| ACTGTGACTGTTGCAGACTGGCTT  | 1  | 69  | RDR2-sensitive |
| ACTGTGAGTCTGTAGGGATGGTCT  | 0  | 11  | RDR2-sensitive |
| ACTGTGCCGGATGGATATACATAC  | 0  | 10  | RDR2-sensitive |
| ACTGTGCGAGCAGAGCGTGACTGT  | 0  | 9   | RDR2-sensitive |
| ACTGTGCTAGCTAGGTCGGGTCGT  | 0  | 10  | RDR2-sensitive |
| ACTGTGGACGCCTACGGTAGATAC  | 0  | 12  | RDR2-sensitive |
| ACTGTGGCAGACTGGCTTGGGTAC  | 0  | 13  | RDR2-sensitive |
| ACTGTGGGTGTGGCTTCGACGAAA  | 0  | 21  | RDR2-sensitive |
| ACTGTGGTTATGGATGCTCGCAA   | 43 | 3   | RDR2-resistant |
| ACTGTGTACGGCTACATCGAACAT  | 0  | 13  | RDR2-sensitive |
| ACTGTGTATCCCTGTAGAGTACGG  | 1  | 105 | RDR2-sensitive |
| ACTGTGTATGACCGAATGACCGCA  | 0  | 12  | RDR2-sensitive |
| ACTGTGTATGTGTAGATGATTGGT  | 0  | 16  | RDR2-sensitive |
| ACTGTTAAGATGGAGGACGACGTT  | 0  | 14  | RDR2-sensitive |
| ACTGTTAGACTGTCCACACGGGTT  | 1  | 12  | RDR2-sensitive |
| ACTGTTAGAGCAGGGTGTTTTGTT  | 30 | 0   | RDR2-resistant |
| ACTGTTAGGATTGATTTGGTGGCA  | 0  | 10  | RDR2-sensitive |
| ACTGTTAGGTAAGTGGACGGATGGG | 0  | 15  | RDR2-sensitive |

|                          |     |     |                |
|--------------------------|-----|-----|----------------|
| ACTGTTATATATTGCAGAGGACTA | 26  | 1   | RDR2-resistant |
| ACTGTTATCTGGACTAATGGGCGG | 0   | 11  | RDR2-sensitive |
| ACTGTTACGGCACTTGCTGGCAC  | 121 | 6   | RDR2-resistant |
| ACTGTTACGTCGGCACCCAGGCTG | 33  | 1   | RDR2-resistant |
| ACTGTTCACTCTGCAACGGCCCAA | 0   | 21  | RDR2-sensitive |
| ACTGTTCACTGTCCGGTGCGCCAC | 0   | 9   | RDR2-sensitive |
| ACTGTTCACTGTCCGGTGGCACAC | 0   | 11  | RDR2-sensitive |
| ACTGTTCAGAGACGGTACTTTGCT | 37  | 0   | RDR2-resistant |
| ACTGTTCCGCATTGTAGACTGCAT | 0   | 14  | RDR2-sensitive |
| ACTGTTGATTGCGTAGAGGGTAA  | 0   | 13  | RDR2-sensitive |
| ACTGTTGACTGTTTACGGAGT    | 0   | 16  | RDR2-sensitive |
| ACTGTTGTTTGGCAGAGGGCAAT  | 0   | 9   | RDR2-sensitive |
| ACTGTTCTCTAGATGCTCAAGACT | 0   | 12  | RDR2-sensitive |
| ACTGTTCTGCACTGTAGACTGCAT | 0   | 19  | RDR2-sensitive |
| ACTGTTCTGCGATCGTAGCCGTCC | 0   | 9   | RDR2-sensitive |
| ACTGTTGACGTGTAGAGGACGAGA | 0   | 31  | RDR2-sensitive |
| ACTGTTGACGTGTAGAGGACGTGA | 0   | 22  | RDR2-sensitive |
| ACTGTTGACTGTGCGAGCTTCGGA | 0   | 10  | RDR2-sensitive |
| ACTGTTGCAGCTGTTTGGATTGCT | 0   | 10  | RDR2-sensitive |
| ACTGTTGCGGGACTGCGGCAGCCT | 0   | 11  | RDR2-sensitive |
| ACTGTTGGACACGTCGATCGGGCT | 0   | 16  | RDR2-sensitive |
| ACTGTTGGACATGTCTTAAGGCTG | 1   | 13  | RDR2-sensitive |
| ACTGTTGGAGTAGCTTTTCCGGTG | 1   | 72  | RDR2-sensitive |
| ACTGTTGGAGTGAATGAAGATGGT | 0   | 159 | RDR2-sensitive |
| ACTGTTGGAGTTAATGAAGATGGT | 1   | 21  | RDR2-sensitive |
| ACTGTTGGATGTGGAGGATGTGGT | 0   | 14  | RDR2-sensitive |
| ACTGTTGGCACTCGGCAAAGACTG | 0   | 27  | RDR2-sensitive |
| ACTGTTGGCCTCTAGCACTGATGG | 0   | 17  | RDR2-sensitive |
| ACTGTTGGCGTGTAGAGGACGAGA | 0   | 27  | RDR2-sensitive |
| ACTGTTGGCTGTGCTGAATACGGA | 0   | 45  | RDR2-sensitive |
| ACTGTTGGGACCATGCTTCGTCCG | 2   | 16  | RDR2-sensitive |
| ACTGTTGGGGCGAAGGCAAAGACG | 0   | 12  | RDR2-sensitive |
| ACTGTTGGGGGTATGCTTCGTAGC | 0   | 14  | RDR2-sensitive |
| ACTGTTGGGGGTATGCTTCGTCCG | 0   | 9   | RDR2-sensitive |
| ACTGTTGGGTCTATGCTTCGTCCG | 1   | 20  | RDR2-sensitive |
| ACTGTTGGGTGTAGATGACGACGA | 0   | 9   | RDR2-sensitive |
| ACTGTTGTGGATGGTAGGCGTCAT | 0   | 25  | RDR2-sensitive |
| ACTGTTGTTGCGGACGCGAGCATG | 0   | 17  | RDR2-sensitive |
| ACTGTTTAGAGGACGCTGCTGGAG | 1   | 42  | RDR2-sensitive |
| ACTGTTTATACTCATTGGACTGGC | 0   | 15  | RDR2-sensitive |
| ACTGTTTCAATTCGATCGTGTCCG | 0   | 18  | RDR2-sensitive |
| ACTGTTTCCTGGAAGACGAGATCT | 0   | 10  | RDR2-sensitive |
| ACTGTTTCGCGTAGAGATGGCTTT | 0   | 17  | RDR2-sensitive |
| ACTGTTTCGTGTAGAGATGGCTTT | 0   | 16  | RDR2-sensitive |
| ACTGTTTCTACTCTTTGGACTGGC | 1   | 17  | RDR2-sensitive |
| ACTGTTTCTTCGGTCTGTGCAGGC | 0   | 9   | RDR2-sensitive |
| ACTGTTTGAAGTGTGCAGGCTAC  | 0   | 10  | RDR2-sensitive |
| ACTGTTTGGCACTGTGGTGTGGGC | 0   | 9   | RDR2-sensitive |
| ACTGTTTATACTCTGTAGACTGC  | 0   | 11  | RDR2-sensitive |

|                          |    |     |                |
|--------------------------|----|-----|----------------|
| ACTGTTTTATATTGTAGAGTGCAT | 0  | 14  | RDR2-sensitive |
| ACTGTTTTGCACTGAAGTCTGCAT | 0  | 14  | RDR2-sensitive |
| ACTGTTTTTACACTTCGGGCTGGC | 0  | 17  | RDR2-sensitive |
| ACTGTTTTTACACTTTGGACTGGC | 0  | 9   | RDR2-sensitive |
| ACTGTTTTTTAGAACCGTCGGTAC | 0  | 22  | RDR2-sensitive |
| ACTTAAGACAGTAGTGTAGACGTC | 0  | 12  | RDR2-sensitive |
| ACTTAAGACAGTAGTGTAGACGTT | 0  | 13  | RDR2-sensitive |
| ACTTAAGACTATAGTGTAGGCGTT | 0  | 29  | RDR2-sensitive |
| ACTTAAGACTGTAGTGTAGGCGTT | 0  | 32  | RDR2-sensitive |
| ACTTAAGCCAGTAGTGTAGACGTC | 0  | 81  | RDR2-sensitive |
| ACTTAATTGTGGGTCTGGGCCGGC | 1  | 13  | RDR2-sensitive |
| ACTTACCGGATCAGGACGAGGGCA | 0  | 16  | RDR2-sensitive |
| ACTTACCGGCTCTAGAAGAGGTTT | 0  | 15  | RDR2-sensitive |
| ACTTAGATCGTTCTCATCTCCGGC | 27 | 2   | RDR2-resistant |
| ACTTAGGCACCTGTGTTGGACACT | 18 | 86  | RDR2-sensitive |
| ACTTAGGGCGGTGAGAAAGGCACA | 0  | 10  | RDR2-sensitive |
| ACTTATACGCCGGGACGGAATCGG | 0  | 10  | RDR2-sensitive |
| ACTTATCGAGCGGATCGACGTCAC | 1  | 48  | RDR2-sensitive |
| ACTTATCGTATTAGAAACGTCGGT | 0  | 193 | RDR2-sensitive |
| ACTTATCGTATTAGGAACGTGGGT | 0  | 10  | RDR2-sensitive |
| ACTTATCGTCTATTGTTGGAGGCA | 0  | 110 | RDR2-sensitive |
| ACTTATGTGATCTTAGGATATGCC | 0  | 9   | RDR2-sensitive |
| ACTTATGTGATCTTAGGGTGTGCC | 1  | 17  | RDR2-sensitive |
| ACTTATTAAGACTGTAAGGGTAGC | 0  | 12  | RDR2-sensitive |
| ACTTATTATCGACGGACGACGGTT | 0  | 9   | RDR2-sensitive |
| ACTTATTTAAAGGATCGTCCATC  | 0  | 9   | RDR2-sensitive |
| ACTTATTTGAGAGATCGTCCCATC | 0  | 23  | RDR2-sensitive |
| ACTTCAATCGAAGACTATCGTCGT | 0  | 47  | RDR2-sensitive |
| ACTTCAATCGAAGACTGTCGTCGT | 2  | 17  | RDR2-sensitive |
| ACTTCAATCGAAGATCGTCGTCGT | 0  | 16  | RDR2-sensitive |
| ACTTCAATCGAAGGTCATCGTCGT | 0  | 14  | RDR2-sensitive |
| ACTTCAATCGAAGGTCGTCGTCGT | 9  | 92  | RDR2-sensitive |
| ACTTCAATCGGAGACTGTCGTCGT | 0  | 9   | RDR2-sensitive |
| ACTTCAATTGAAGATTGTCGTCGT | 0  | 9   | RDR2-sensitive |
| ACTTCACTGACGTTGGATGGCTGC | 24 | 3   | RDR2-resistant |
| ACTTCATCGTATCGTGACGGCACT | 0  | 12  | RDR2-sensitive |
| ACTTCCATGCAGTTAGACTCGTTA | 36 | 1   | RDR2-resistant |
| ACTTCCCGTCAGCAGTAGAGACGT | 0  | 14  | RDR2-sensitive |
| ACTTCCGACGGCTTAAGACGGGTC | 0  | 17  | RDR2-sensitive |
| ACTTCCTCGGTCAACGGATGCCAC | 0  | 17  | RDR2-sensitive |
| ACTTCGAGCTGGTATGACACGGTC | 0  | 55  | RDR2-sensitive |
| ACTTCGAGCTGTAGTTAGTGCATG | 0  | 12  | RDR2-sensitive |
| ACTTCGCGACTGGACTCCGCGGCT | 1  | 12  | RDR2-sensitive |
| ACTTCGCTATCTGGACCTGACGGG | 0  | 12  | RDR2-sensitive |
| ACTTCGGACTAGCACGGCACGGCC | 0  | 9   | RDR2-sensitive |
| ACTTCGGACTGATACGGCACGACC | 1  | 20  | RDR2-sensitive |
| ACTTCGGACTGGAAGGGTAGGCAG | 0  | 24  | RDR2-sensitive |
| ACTTCGGACTGGCACGGCACGACC | 1  | 19  | RDR2-sensitive |
| ACTTCGGCAGACTCTTTCAGAAGC | 0  | 12  | RDR2-sensitive |

|                          |     |    |                |
|--------------------------|-----|----|----------------|
| ACTTCGGGCTGACACGACACGGCC | 0   | 10 | RDR2-sensitive |
| ACTTCGGGCTGACACGATACGGCC | 0   | 9  | RDR2-sensitive |
| ACTTCGGGCTGACACGGCACGGCC | 0   | 10 | RDR2-sensitive |
| ACTTCGGGCTGGCACGACACGGCC | 1   | 25 | RDR2-sensitive |
| ACTTCGGGCTGGCACGACACGGTC | 3   | 52 | RDR2-sensitive |
| ACTTCGGGCTGGCACGGCACGACC | 0   | 15 | RDR2-sensitive |
| ACTTCGGGCTGGCACGGCACGGCC | 0   | 58 | RDR2-sensitive |
| ACTTCGGGCTGGCACGGCACGGTC | 0   | 12 | RDR2-sensitive |
| ACTTCGGGCTGGCACGGCATGTCC | 0   | 11 | RDR2-sensitive |
| ACTTCGGGCTGGCACGGTATGACC | 0   | 19 | RDR2-sensitive |
| ACTTCGGGCTTGCATGGCACGGTT | 0   | 9  | RDR2-sensitive |
| ACTTCGGGGCTGGCACGACACGGT | 0   | 18 | RDR2-sensitive |
| ACTTCGTCGACCAGTTATTGGCTT | 2   | 16 | RDR2-sensitive |
| ACTTCGTCGAGTGTTTTCAGGCTT | 0   | 12 | RDR2-sensitive |
| ACTTCGTCGAGTGTTTTCAGGCT  | 0   | 16 | RDR2-sensitive |
| ACTTCTAGTTAGAACGTCGTTGCT | 21  | 1  | RDR2-resistant |
| ACTTCTCACGGACAGCGTCAGCAT | 0   | 9  | RDR2-sensitive |
| ACTTCTGACGTGTTGCTGAAATGG | 0   | 19 | RDR2-sensitive |
| ACTTCTGGCACTGTGGTTTGGCCC | 0   | 10 | RDR2-sensitive |
| ACTTCTGTGATCTGTTTGGAGCGC | 0   | 10 | RDR2-sensitive |
| ACTTCTGTGCGTAGATCGCGGGTC | 1   | 13 | RDR2-sensitive |
| ACTTCTTCATACTGTAGTAGGGGT | 0   | 15 | RDR2-sensitive |
| ACTTCTTGCTGCTAGTCGACGATC | 16  | 0  | RDR2-resistant |
| ACTTGAACATGGTCGACGGCAAAG | 0   | 13 | RDR2-sensitive |
| ACTTGAACATGGTCGACGGCGAGG | 0   | 37 | RDR2-sensitive |
| ACTTGAACCCGCGGAGACTCGAAG | 0   | 13 | RDR2-sensitive |
| ACTTGAACGACTGAGGGAGGCCGC | 0   | 19 | RDR2-sensitive |
| ACTTGAATCGTTGGTTTTGATGGT | 0   | 16 | RDR2-sensitive |
| ACTTGAATGGATCGAATCGGGTTT | 0   | 20 | RDR2-sensitive |
| ACTTGACACAGGACGAGAACGGGC | 0   | 11 | RDR2-sensitive |
| ACTTGACGGAGCCTCGGACGCTAG | 36  | 6  | RDR2-resistant |
| ACTTGACTGTGAATTGGGTTGGGT | 0   | 30 | RDR2-sensitive |
| ACTTGAGAAGTAGATCATGGTCGT | 15  | 0  | RDR2-resistant |
| ACTTGATCAGAGTGGACTGGGCAC | 0   | 21 | RDR2-sensitive |
| ACTTGATGGCTGATACGGACGGGA | 0   | 9  | RDR2-sensitive |
| ACTTGATGGCTGGTACGGACGGGA | 0   | 14 | RDR2-sensitive |
| ACTTGCACGCGGATAGCCAGGCTC | 0   | 19 | RDR2-sensitive |
| ACTTGCAGGACTAGCGGCGAAGAC | 0   | 11 | RDR2-sensitive |
| ACTTGCAGGATGATATAACAATGT | 14  | 0  | RDR2-resistant |
| ACTTGCGACTGAAAGACGACGGTT | 0   | 23 | RDR2-sensitive |
| ACTTGCTCTGTGATCTTCTCTATA | 30  | 0  | RDR2-resistant |
| ACTTGGACAGACAGACGGATCTTC | 0   | 10 | RDR2-sensitive |
| ACTTGGACCAGGCCTAAACAGCAG | 0   | 20 | RDR2-sensitive |
| ACTTGGACGAACCGTGCAGGACG  | 0   | 17 | RDR2-sensitive |
| ACTTGGACGAACGACTGGGCGGCG | 0   | 11 | RDR2-sensitive |
| ACTTGGACGGAACACCGGTTGGCG | 0   | 12 | RDR2-sensitive |
| ACTTGGACTTATTGAAGAGGACGA | 122 | 6  | RDR2-resistant |
| ACTTGGACTTCATGCGGTCGGCAC | 0   | 12 | RDR2-sensitive |
| ACTTGGACTTTATTGGACGCGCCG | 2   | 15 | RDR2-sensitive |

|                           |      |     |                |
|---------------------------|------|-----|----------------|
| ACTTGGATCATGTGGAAGACGACT  | 0    | 21  | RDR2-sensitive |
| ACTTGGCGTAGACGAGGATGACGA  | 0    | 9   | RDR2-sensitive |
| ACTTGGGAAGGCGACGAACAGCAA  | 0    | 13  | RDR2-sensitive |
| ACTTGGGGCTGTGTAAACAGGTAT  | 1    | 28  | RDR2-sensitive |
| ACTTGGTCGGCTGCTACGATACGG  | 0    | 9   | RDR2-sensitive |
| ACTTGGTCGGTCGGTGC GGCGATT | 4    | 22  | RDR2-sensitive |
| ACTTGTAAGCTGATAGAGACGCAT  | 0    | 12  | RDR2-sensitive |
| ACTTGTAAGAACCTAGAGAAGAA   | 0    | 10  | RDR2-sensitive |
| ACTTGTAGATCTATCAGATAACGT  | 0    | 9   | RDR2-sensitive |
| ACTTGATACTTTAGAGGCTAATT   | 16   | 0   | RDR2-resistant |
| ACTTGTCAAGTAGTTCAGGGGCAC  | 6    | 24  | RDR2-sensitive |
| ACTTGTCAAGTAGTTCAGGGGCAC  | 0    | 11  | RDR2-sensitive |
| ACTTGTCCCATGCGGTGACGGAC   | 0    | 28  | RDR2-sensitive |
| ACTTGTCCGCTAGGACAGTTCGGC  | 0    | 15  | RDR2-sensitive |
| ACTTGTGCTGATTGGATGACTTGA  | 2240 | 231 | RDR2-resistant |
| ACTTGTGCTGATTGGATGACTTGC  | 22   | 2   | RDR2-resistant |
| ACTTGTGCTGATTGGATGACTTGT  | 71   | 3   | RDR2-resistant |
| ACTTGTTATGGATTTAAACCGGCT  | 0    | 53  | RDR2-sensitive |
| ACTTGTTATGGATTTAAATCGGCT  | 0    | 9   | RDR2-sensitive |
| ACTTGTTCCGGGCTTGCTGCGGCTT | 0    | 12  | RDR2-sensitive |
| ACTTGTTCTGATCTGATCGCGGAT  | 0    | 14  | RDR2-sensitive |
| ACTTGTTGCCTTGTTGGACATGCC  | 0    | 10  | RDR2-sensitive |
| ACTTGTTGGTGGGCATGTTAGTAG  | 15   | 0   | RDR2-resistant |
| ACTTGTTTGTGACTCAATGGCGTT  | 0    | 10  | RDR2-sensitive |
| ACTTTAAGTGGGATATGGTGATGG  | 26   | 1   | RDR2-resistant |
| ACTTTAATCAAAGGTCGTCGTCGT  | 0    | 11  | RDR2-sensitive |
| ACTTTAATCGAAGGTCGTCGTCGT  | 1    | 12  | RDR2-sensitive |
| ACTTTAATTGAAGGTCGTCGTCGA  | 0    | 11  | RDR2-sensitive |
| ACTTTAGACGGACATTTTTGGCAT  | 0    | 13  | RDR2-sensitive |
| ACTTTATACTGTAGTAGAGGGTAC  | 0    | 13  | RDR2-sensitive |
| ACTTTCAGTGGGACATTCGACGTT  | 42   | 3   | RDR2-resistant |
| ACTTTCAGTTACAGACGGATTGGT  | 0    | 16  | RDR2-sensitive |
| ACTTTCATACTGTAGAAGAGGATA  | 0    | 50  | RDR2-sensitive |
| ACTTTCCGACGGCTGTGTCAGAGGC | 0    | 21  | RDR2-sensitive |
| ACTTTCCGATTCCGGTTTAGGTAT  | 0    | 119 | RDR2-sensitive |
| ACTTTCCGGTGGCCTCTGACACGGC | 1    | 28  | RDR2-sensitive |
| ACTTTCTAAGGCTGTTGAAAGACG  | 0    | 12  | RDR2-sensitive |
| ACTTTCTATGGAAGCGCGGACGGT  | 0    | 10  | RDR2-sensitive |
| ACTTTCTGCATCACTCTAGACGGT  | 1    | 22  | RDR2-sensitive |
| ACTTTCTGCGGAGCCACGGACGGT  | 0    | 19  | RDR2-sensitive |
| ACTTTGACGAAGGCCTGCGGCGAC  | 4    | 17  | RDR2-sensitive |
| ACTTTGACTGTGGCAGATCGGCTT  | 0    | 9   | RDR2-sensitive |
| ACTTTGATATTGTTGGCACTAAAA  | 48   | 6   | RDR2-resistant |
| ACTTTGCGTTGCTAGATCGTTGTC  | 0    | 9   | RDR2-sensitive |
| ACTTTGGACAGACGTTTTTGGCAT  | 1    | 18  | RDR2-sensitive |
| ACTTTGGACGACGTGTTTTGGCAT  | 8    | 40  | RDR2-sensitive |
| ACTTTGGACGATGTGTTTTGGCAT  | 0    | 10  | RDR2-sensitive |
| ACTTTGGACGGACGTTCTTGGCAT  | 0    | 22  | RDR2-sensitive |

|                          |    |    |                |
|--------------------------|----|----|----------------|
| ACTTTGGACGTCCAGTTTTGGCAT | 2  | 44 | RDR2-sensitive |
| ACTTTGGACTGGCACGACACGGCT | 0  | 23 | RDR2-sensitive |
| ACTTTGGGCTAGCATGACACGGTT | 0  | 35 | RDR2-sensitive |
| ACTTTGGGCTGGTATGGTACGGTC | 0  | 11 | RDR2-sensitive |
| ACTTTGTATTCATCTCGGACCTCC | 20 | 0  | RDR2-resistant |
| ACTTTGTGCGGAGGAAGGATGTCC | 1  | 18 | RDR2-sensitive |
| ACTTTGTGGATATTGATCGTTGAG | 0  | 11 | RDR2-sensitive |
| ACTTTGTGTAGAGCGCGTGATCGT | 0  | 9  | RDR2-sensitive |
| ACTTTGTGTGTGAGACTGACGACA | 0  | 14 | RDR2-sensitive |
| ACTTTGTTAGGCTGTACCGGTGTA | 0  | 13 | RDR2-sensitive |
| ACTTTGTTTGGCTGATGAAGGTGC | 50 | 5  | RDR2-resistant |
| ACTTTTAAGACTGCATTAATGACA | 46 | 0  | RDR2-resistant |
| ACTTTTAGTATCGTTCGGAGCCAT | 0  | 11 | RDR2-sensitive |
| ACTTTTCGAGGATCTGACAGACGG | 0  | 10 | RDR2-sensitive |
| ACTTTTGGTGATAAATCGACGGGG | 17 | 1  | RDR2-resistant |
| ACTTTTTCGTGTCTGACTAGGCT  | 0  | 23 | RDR2-sensitive |
| ACTTTTTGTAGTGTTGATCTCGGA | 0  | 12 | RDR2-sensitive |
| AGAAAACTTTGATGATCTGTCTT  | 18 | 1  | RDR2-resistant |
| AGAAAACCGGAAGTTCGGCCA    | 0  | 15 | RDR2-sensitive |
| AGAAAACCGGGTCGGACCGTCTGA | 0  | 10 | RDR2-sensitive |
| AGAAAACGGTACGAGTCGGGACGA | 0  | 9  | RDR2-sensitive |
| AGAAAACGGTACGAGTCGGGACGG | 0  | 10 | RDR2-sensitive |
| AGAAAACGGTACGGGTCGGAACGA | 0  | 17 | RDR2-sensitive |
| AGAAAACGGTACGGGTCGGGACGA | 0  | 18 | RDR2-sensitive |
| AGAAAACGGTACGGGTCGGGACGG | 0  | 27 | RDR2-sensitive |
| AGAAAAGTGGACAGGGCTGGCTAA | 0  | 12 | RDR2-sensitive |
| AGAAAAGACGGCGTCGGTACCTGC | 0  | 12 | RDR2-sensitive |
| AGAAAAGACTGTAAATGACGGATA | 1  | 27 | RDR2-sensitive |
| AGAAAATAATGGGACTGAGGGCAT | 0  | 11 | RDR2-sensitive |
| AGAAAATCGGTTTAGGTCGTCTAA | 0  | 14 | RDR2-sensitive |
| AGAAACCGGATCGAAGATCGGCAT | 0  | 14 | RDR2-sensitive |
| AGAAACCGGCCCGTGGAGCAGGCG | 0  | 12 | RDR2-sensitive |
| AGAAACGGACCCAGGAACGTGCGG | 3  | 53 | RDR2-sensitive |
| AGAAACGGTGAATTATCAATGCA  | 14 | 0  | RDR2-resistant |
| AGAAAGACGCGCGACCAGAGACTT | 0  | 16 | RDR2-sensitive |
| AGAAAGACGGATGGACTCACCGCC | 2  | 14 | RDR2-sensitive |
| AGAAAGACTGCTATGCACGCTTAC | 0  | 16 | RDR2-sensitive |
| AGAAAGCTGACTGGGAGACGCCAC | 0  | 24 | RDR2-sensitive |
| AGAAAGTTCGCCGAGTCACGCCAA | 1  | 13 | RDR2-sensitive |
| AGAAAGTCGGGAACAGACGGACAC | 0  | 12 | RDR2-sensitive |
| AGAAATGGTGGCAGAACACGGAAC | 0  | 28 | RDR2-sensitive |
| AGAAATTGTGTGCTTTGGGCCGGC | 2  | 50 | RDR2-sensitive |
| AGAACACACCACTGTGGACGCCTA | 0  | 9  | RDR2-sensitive |
| AGAACACACGGCAAAGAAGCTGAT | 1  | 12 | RDR2-sensitive |
| AGAACACGAGGATGGCAGAACGGC | 0  | 17 | RDR2-sensitive |
| AGAACACGCGGCATGCAGACTCTC | 0  | 18 | RDR2-sensitive |
| AGAACACGGAATGGGCAGAACGCG | 0  | 11 | RDR2-sensitive |
| AGAACACGGCGCACATGTAGACAC | 0  | 21 | RDR2-sensitive |
| AGAACACGGCGCACATGTGAACGC | 0  | 29 | RDR2-sensitive |



|                           |    |     |                |
|---------------------------|----|-----|----------------|
| AGAACACGGGATCGACTGAGACGT  | 0  | 22  | RDR2-sensitive |
| AGAACACGGGGAGGACAGAACGGC  | 0  | 24  | RDR2-sensitive |
| AGAACACGGTGCACCTTGTGGACGC | 4  | 213 | RDR2-sensitive |
| AGAACACGTAGACGGCAGAACGGC  | 0  | 17  | RDR2-sensitive |
| AGAACACGTCAGAGGCAGACTACT  | 0  | 22  | RDR2-sensitive |
| AGAACACGTCTGATTGGGTGGCGC  | 0  | 28  | RDR2-sensitive |
| AGAACACTGTTTTGCATCGTGGAT  | 0  | 9   | RDR2-sensitive |
| AGAACAGACGTGGAGCGGTGGCAC  | 0  | 14  | RDR2-sensitive |
| AGAACAGACTCTGCTCGGATCGGT  | 0  | 14  | RDR2-sensitive |
| AGAACAGAGCGGCTCCGTTCTAG   | 0  | 17  | RDR2-sensitive |
| AGAACAGAGGTGACAGGGGGCTAA  | 23 | 3   | RDR2-resistant |
| AGAACAGCCGTTGGCAGAACACGT  | 0  | 53  | RDR2-sensitive |
| AGAACAGCCGTTGGCAGAACGCGT  | 1  | 15  | RDR2-sensitive |
| AGAACAGCCTGCAGCCACGGACAC  | 0  | 15  | RDR2-sensitive |
| AGAACAGGAATGGTGGCAGAACAC  | 0  | 26  | RDR2-sensitive |
| AGAACAGGACATAGGAGTAGGCGT  | 0  | 41  | RDR2-sensitive |
| AGAACAGGGAATGACAGAACGCGG  | 0  | 9   | RDR2-sensitive |
| AGAACAGGTACCGCAGGATGAGGC  | 1  | 12  | RDR2-sensitive |
| AGAACAGTGGTGCTGTGGACGGCT  | 0  | 9   | RDR2-sensitive |
| AGAACATCTGGTGTAGACGCCTAC  | 0  | 9   | RDR2-sensitive |
| AGAACATGGTGTACTGTGGACGAC  | 0  | 31  | RDR2-sensitive |
| AGAACCAAGCGACGGACGAAGCAA  | 0  | 17  | RDR2-sensitive |
| AGAACCAGCGACGGTGCCCTCTGC  | 0  | 14  | RDR2-sensitive |
| AGAACCAGGCTCAAGAGAACACGC  | 0  | 18  | RDR2-sensitive |
| AGAACCAGGAACCGAACCGAAGA   | 3  | 27  | RDR2-sensitive |
| AGAACCGCATGCAGATCTCCGC    | 1  | 14  | RDR2-sensitive |
| AGAACCAGGAATGGTGGCAGAACAA | 0  | 30  | RDR2-sensitive |
| AGAACCGGCGACGGTGCTCTCTGC  | 4  | 19  | RDR2-sensitive |
| AGAACCGGTTGGAATAGAACGGCT  | 0  | 12  | RDR2-sensitive |
| AGAACCGTCGCAGAAGGAGGACAA  | 0  | 17  | RDR2-sensitive |
| AGAACCGTCTGAGCTCAGGGCATC  | 1  | 16  | RDR2-sensitive |
| AGAACCGTGCACCGTGGACGTCTA  | 0  | 11  | RDR2-sensitive |
| AGAACCGTGCTGAATGTGGACGTC  | 1  | 43  | RDR2-sensitive |
| AGAACCGTTTAGAGGACGCTGCTG  | 0  | 18  | RDR2-sensitive |
| AGAACCTGTACGAGCCGACACGG   | 1  | 27  | RDR2-sensitive |
| AGAACGACCGCAACTGGGAGGCTA  | 0  | 11  | RDR2-sensitive |
| AGAACGAGCCCGAGCTGAGACTGT  | 0  | 15  | RDR2-sensitive |
| AGAACGAGCCTGAGCCGAGCCGAG  | 0  | 9   | RDR2-sensitive |
| AGAACGCACCACTGTTCGACGTCTA | 0  | 9   | RDR2-sensitive |
| AGAACGCGGAATGACCGACTACTA  | 0  | 11  | RDR2-sensitive |
| AGAACGCGGAATGGCCGACTACTA  | 0  | 30  | RDR2-sensitive |
| AGAACGCGGCAGTGTGGACGCCTA  | 0  | 14  | RDR2-sensitive |
| AGAACGCGTCAGAGGCAGAACGGC  | 0  | 50  | RDR2-sensitive |
| AGAACGGCAGAACACACTGATGGC  | 0  | 18  | RDR2-sensitive |
| AGAACGGCAGAACAGCAGACTACT  | 0  | 40  | RDR2-sensitive |
| AGAACGGCAGAACCAAGGAGACAT  | 0  | 10  | RDR2-sensitive |
| AGAACGGCAGAACGCAGGAAGACA  | 0  | 9   | RDR2-sensitive |
| AGAACGGCAGAACGCGTCAGAGGC  | 0  | 9   | RDR2-sensitive |
| AGAACGGCAGAACGGCAGAACCAC  | 0  | 23  | RDR2-sensitive |

|                              |      |    |                |
|------------------------------|------|----|----------------|
| AGAACGGCAGAACGGCAGAACCGC     | 0    | 14 | RDR2-sensitive |
| AGAACGGCAGAACGGCAGAACGAA     | 0    | 9  | RDR2-sensitive |
| AGAACGGCAGAACGGCAGAACGCA     | 0    | 9  | RDR2-sensitive |
| AGAACGGCAGAACGGCAGAACGCG     | 0    | 9  | RDR2-sensitive |
| AGAACGGCAGAACGGCAGAACGGC     | 0    | 44 | RDR2-sensitive |
| AGAACGGCAGAACGGCAGACTACC     | 0    | 27 | RDR2-sensitive |
| AGAACGGCAGAACGGCAGACTACT     | 0    | 65 | RDR2-sensitive |
| AGAACGGCAGACTACTCTTACCTT     | 1    | 19 | RDR2-sensitive |
| AGAACGGCGTACGGTTGTGGACGC     | 0    | 22 | RDR2-sensitive |
| AGAACGGGCAGAACCACGGTGAC      | 0    | 10 | RDR2-sensitive |
| AGAACGGTACGAGATATGACGATC     | 0    | 9  | RDR2-sensitive |
| AGAACGGTAGAACCACGGTGGCAG     | 0    | 28 | RDR2-sensitive |
| AGAACGGTAGAACCAGAGAGACAG     | 0    | 10 | RDR2-sensitive |
| AGAACGGTAGAACGAGGGAGGCAG     | 0    | 10 | RDR2-sensitive |
| AGAACGGTTTACAGACTCTTGTTG     | 1    | 14 | RDR2-sensitive |
| AGAACGTGCGAGTGTGGACGCCTA     | 0    | 12 | RDR2-sensitive |
| AGAACGTTGCTGTAGCGAGTAGAG     | 0    | 33 | RDR2-sensitive |
| AGAAGTAGTTGTTCGGCATGGGCAA    | 0    | 10 | RDR2-sensitive |
| AGAAGTATCTGACCTGGGCTGACG     | 0    | 16 | RDR2-sensitive |
| AGAAGTACGTGGAAGGATGACAT      | 1    | 37 | RDR2-sensitive |
| AGAAGTCTGATCCATAGAGACAA      | 15   | 0  | RDR2-resistant |
| AGAAGTCGAGGAATTTAGGCATT      | 1010 | 91 | RDR2-resistant |
| AGAAGTCTGCAGGTAGAGCTGTAC     | 1    | 22 | RDR2-sensitive |
| AGAAGTACTGATGGCATCTCCTC      | 0    | 10 | RDR2-sensitive |
| AGAAGTACTGAGAGCCGCCATAGACGA  | 0    | 51 | RDR2-sensitive |
| AGAAGTACTGATCTGAGCCTGACACGG  | 0    | 31 | RDR2-sensitive |
| AGAAGTACTGGACCATGTTCGGGCTCGG | 0    | 9  | RDR2-sensitive |
| AGAAGTACTGTAGTCTTTATTGCAGAG  | 0    | 22 | RDR2-sensitive |
| AGAAGTACTGTGTTTCTTGGCATGCTC  | 0    | 12 | RDR2-sensitive |
| AGAAGTACTGTTAGTGCATTTTACGTT  | 48   | 3  | RDR2-resistant |
| AGAAGTACTGTTTCGTTTTGATGTTGGC | 0    | 10 | RDR2-sensitive |
| AGAAGTACTGTTTAGAGGACGCTGCTG  | 1    | 28 | RDR2-sensitive |
| AGAAGTACTGTTTTAGACGATTGCAT   | 0    | 24 | RDR2-sensitive |
| AGAAGTACTTAGGGCGGGTGCCTCCG   | 0    | 14 | RDR2-sensitive |
| AGAAGTACTTCTGGTCTGTGCCTCGG   | 0    | 13 | RDR2-sensitive |
| AGAAGTACTGAACCAAACATGGCATG   | 14   | 0  | RDR2-resistant |
| AGAAGTACTGGTCTGCTAGATGACGA   | 0    | 80 | RDR2-sensitive |
| AGAAGAAGTACTCACACGCACAGACAA  | 0    | 12 | RDR2-sensitive |
| AGAAGAAGTACTGAAGCTACTTGATCC  | 1    | 18 | RDR2-sensitive |
| AGAAGAATCTTGCATCGTTGTGGC     | 1    | 47 | RDR2-sensitive |
| AGAAGACAGAGCTCCAACGGTTCGG    | 0    | 13 | RDR2-sensitive |
| AGAAGACAGTGTAGACTGCCCCCG     | 0    | 9  | RDR2-sensitive |
| AGAAGACAGAGGAGCGACGACGC      | 0    | 13 | RDR2-sensitive |
| AGAAGACCCTAGAAGTGGAGGCGC     | 0    | 28 | RDR2-sensitive |
| AGAAGACCCTGTTGAGCTTGACTC     | 154  | 17 | RDR2-resistant |
| AGAAGACGACACTCTGCGCCATCA     | 0    | 15 | RDR2-sensitive |
| AGAAGACGACGAAGTCCGCCTCGC     | 2    | 32 | RDR2-sensitive |
| AGAAGACGACGAAGTCCGCTCCGC     | 2    | 47 | RDR2-sensitive |
| AGAAGACGACGAAGTCCGCTTCAC     | 0    | 16 | RDR2-sensitive |

|                           |     |     |                |
|---------------------------|-----|-----|----------------|
| AGAAGACGACGAACTCCGCTTCGC  | 12  | 130 | RDR2-sensitive |
| AGAAGACGACTCTCTGCGCCATCG  | 1   | 17  | RDR2-sensitive |
| AGAAGACGATGAACTAGATCATT   | 0   | 10  | RDR2-sensitive |
| AGAAGACGCCGGCTGTGAATGGGC  | 0   | 11  | RDR2-sensitive |
| AGAAGACGCGCGAGAAGCTGGACG  | 0   | 40  | RDR2-sensitive |
| AGAAGACGTAGAGTCAGACGACGT  | 0   | 30  | RDR2-sensitive |
| AGAAGACGTAGTTGAACTCTTCAT  | 0   | 25  | RDR2-sensitive |
| AGAAGACTCTGCGCCATTGTGAAC  | 0   | 20  | RDR2-sensitive |
| AGAAGACTCTGGCGCACTGTCCAC  | 0   | 14  | RDR2-sensitive |
| AGAAGACTGGAAAGAGGTGGCCGC  | 0   | 17  | RDR2-sensitive |
| AGAAGACTGGTACACATGGTGCAC  | 0   | 16  | RDR2-sensitive |
| AGAAGACTGGTGCACATGGTGCAC  | 0   | 21  | RDR2-sensitive |
| AGAAGACTGTAAAAGACGGATATA  | 0   | 10  | RDR2-sensitive |
| AGAAGACTGTAAAGACGGATATA   | 0   | 49  | RDR2-sensitive |
| AGAAGACTGTAAAGCAGCCGTCGCA | 0   | 12  | RDR2-sensitive |
| AGAAGACTGTGGCCAGGGGCGGAC  | 1   | 17  | RDR2-sensitive |
| AGAAGACTTTGTTGAGCGCCGCAC  | 1   | 12  | RDR2-sensitive |
| AGAAGAGACTGTAAATGACGGATA  | 0   | 37  | RDR2-sensitive |
| AGAAGAGGTCACCGTTGTAGGCAA  | 0   | 12  | RDR2-sensitive |
| AGAAGATACTGTATCTCAGCTGGA  | 70  | 1   | RDR2-resistant |
| AGAAGATCCGGCGAGGAAGGACAT  | 0   | 11  | RDR2-sensitive |
| AGAAGATCCGTGCCGTGCCTGTTA  | 0   | 28  | RDR2-sensitive |
| AGAAGATCTTGAAGGTGCTAACGT  | 38  | 0   | RDR2-resistant |
| AGAAGATGTAGAGAACCCGTCTCC  | 2   | 17  | RDR2-sensitive |
| AGAAGATGTTCCGACGGCTGCTAT  | 54  | 1   | RDR2-resistant |
| AGAAGATGTTGTGCTGCTTCCTTT  | 120 | 4   | RDR2-resistant |
| AGAAGCAATCCGGCTCGGAATCGT  | 0   | 21  | RDR2-sensitive |
| AGAAGCACGGACGGTCCGTAACAC  | 0   | 9   | RDR2-sensitive |
| AGAAGCAGGAGCTGGAGCTTTACC  | 0   | 9   | RDR2-sensitive |
| AGAAGCAGGAGCTGGAGCTTTGCC  | 0   | 17  | RDR2-sensitive |
| AGAAGCAGTAGAATGCACGGGCGC  | 0   | 10  | RDR2-sensitive |
| AGAAGCATAGCTATTGGATCTGAT  | 43  | 0   | RDR2-resistant |
| AGAAGCCAAGTAGAACGGAGTCGT  | 0   | 26  | RDR2-sensitive |
| AGAAGCCCCTGAGCAGCAGTCGGT  | 0   | 25  | RDR2-sensitive |
| AGAAGCCGAGAACACCAGTAGCGT  | 0   | 17  | RDR2-sensitive |
| AGAAGCCGCAGCCGCAGCCGATT   | 7   | 38  | RDR2-sensitive |
| AGAAGCCGGTGGTTAGAATCTAGG  | 0   | 9   | RDR2-sensitive |
| AGAAGCCTACGTTGATGATCGCGA  | 16  | 0   | RDR2-resistant |
| AGAAGCGATGATGGTGTGGGAACT  | 1   | 22  | RDR2-sensitive |
| AGAAGCGGAACAGACGACGCACAT  | 1   | 35  | RDR2-sensitive |
| AGAAGCGGCTCCTCCTCTGCGTAT  | 0   | 13  | RDR2-sensitive |
| AGAAGCGGCTCGAACTACCGTGAC  | 0   | 23  | RDR2-sensitive |
| AGAAGCTCGGCGCCAATGATGACG  | 1   | 17  | RDR2-sensitive |
| AGAAGCTGGAGCTGGTACTGACTC  | 2   | 15  | RDR2-sensitive |
| AGAAGCTGGCTGAAAAGCTGACGC  | 0   | 14  | RDR2-sensitive |
| AGAAGCTGGCTGAAAAGCTGACGT  | 2   | 60  | RDR2-sensitive |
| AGAAGCTGGCTGCTGAGCGTTTGG  | 0   | 12  | RDR2-sensitive |
| AGAAGCTGGTGCCCATGGGGTGAC  | 31  | 3   | RDR2-resistant |
| AGAAGCTGTCGGCAAACGGCTCCA  | 2   | 20  | RDR2-sensitive |

|                           |    |     |                |
|---------------------------|----|-----|----------------|
| AGAAGGAAACCTGGGAACCGGCAA  | 4  | 223 | RDR2-sensitive |
| AGAAGGAAACCTGGGAACCGGTAA  | 0  | 89  | RDR2-sensitive |
| AGAAGGAACAGGTAACGAGGAGAT  | 26 | 2   | RDR2-resistant |
| AGAAGGACGACCGAAGACTGGAGC  | 0  | 10  | RDR2-sensitive |
| AGAAGGACTTGACATGGTTTTTA   | 21 | 1   | RDR2-resistant |
| AGAAGGCAACCGAATGCGAACCAT  | 0  | 11  | RDR2-sensitive |
| AGAAGGCAACCTGGGAACCGGTAA  | 0  | 33  | RDR2-sensitive |
| AGAAGGCACCGCCACGGTCTTGT   | 0  | 9   | RDR2-sensitive |
| AGAAGGCCAGGTAGAGCGGTTGGT  | 0  | 50  | RDR2-sensitive |
| AGAAGGCCGGCGCGTAGAGGACGC  | 0  | 17  | RDR2-sensitive |
| AGAAGGCGTGAACGAAGACGGGAA  | 0  | 9   | RDR2-sensitive |
| AGAAGGCTGCGATGAACCGGCGTC  | 1  | 15  | RDR2-sensitive |
| AGAAGGCTGCTGAGCACGACACGC  | 0  | 11  | RDR2-sensitive |
| AGAAGGCTGTAGTCAGGCCGTGAA  | 2  | 17  | RDR2-sensitive |
| AGAAGGCTTTGCCGAGTGCCGCAC  | 0  | 30  | RDR2-sensitive |
| AGAAGGGAACCTGGGAACCGGTAA  | 0  | 9   | RDR2-sensitive |
| AGAAGGGAAGTCAGGAACGAGCAT  | 0  | 11  | RDR2-sensitive |
| AGAAGGGCCACTGTCAGGTTTTGAA | 47 | 0   | RDR2-resistant |
| AGAAGGGCTGCGTAGAGATCGGCG  | 0  | 11  | RDR2-sensitive |
| AGAAGGGTCCGCTACAGTTTCTAT  | 0  | 9   | RDR2-sensitive |
| AGAAGGTGCTGTATGCTGTTTTGA  | 39 | 4   | RDR2-resistant |
| AGAAGGTGGGACGAGAATGGGCTG  | 0  | 11  | RDR2-sensitive |
| AGAAGGTTGGCCGCGCGGGGACGA  | 2  | 15  | RDR2-sensitive |
| AGAAGTCACGGACCAACCCGGCTC  | 0  | 12  | RDR2-sensitive |
| AGAAGTCATTGTGATGTACGGTT   | 0  | 11  | RDR2-sensitive |
| AGAAGTCGCTACGGATGGACAGGC  | 0  | 14  | RDR2-sensitive |
| AGAAGTCGCTACTGCAGAAGGCAG  | 0  | 9   | RDR2-sensitive |
| AGAAGTCGCTGCTGTAGAAGGCGG  | 1  | 26  | RDR2-sensitive |
| AGAAGTCTGCATGATACTGATGGT  | 0  | 10  | RDR2-sensitive |
| AGAAGTGGCTCCTTCTCTGTGTAC  | 0  | 11  | RDR2-sensitive |
| AGAAGTGTGGAATGATAGCTTTAG  | 24 | 1   | RDR2-resistant |
| AGAAGTGTGATTGTATGTGGCT    | 0  | 10  | RDR2-sensitive |
| AGAAGTCCGTCGTACATCGTTAG   | 0  | 13  | RDR2-sensitive |
| AGAAGTTGGTTCGATCTATTTGGG  | 24 | 1   | RDR2-resistant |
| AGAAGTTGTATTGGTATTCTTCAG  | 46 | 0   | RDR2-resistant |
| AGAAGTTTTAGGCATAGACCTCGT  | 1  | 12  | RDR2-sensitive |
| AGAAGTTTTATCACGTGCGTCCG   | 0  | 12  | RDR2-sensitive |
| AGAATAA ACTCTGATAGTCTGATT | 16 | 0   | RDR2-resistant |
| AGAATACTGTCCAAGCTTCGGCAT  | 55 | 4   | RDR2-resistant |
| AGAATAGCAGGCTGGACGATGCAT  | 0  | 9   | RDR2-sensitive |
| AGAATAGCGGTGTA CTGTAGCCCC | 0  | 9   | RDR2-sensitive |
| AGAATAGTATTTGATTGTGGGAC   | 61 | 7   | RDR2-resistant |
| AGAATAGTCGGGCCAGCACGGCAC  | 1  | 17  | RDR2-sensitive |
| AGAATAGTCGGGCCGGCACGGCAC  | 0  | 18  | RDR2-sensitive |
| AGAATCAGGAGCTGAAGCTGTGCC  | 0  | 12  | RDR2-sensitive |
| AGAATCAGGGATGGAACGACTCCG  | 0  | 10  | RDR2-sensitive |
| AGAATCAGGGATGGAACGGCTCCG  | 0  | 39  | RDR2-sensitive |
| AGAATCAGGGCGGCTGCACTCCAC  | 0  | 59  | RDR2-sensitive |
| AGAATCCATGGTCGTCATCGTCGT  | 1  | 13  | RDR2-sensitive |

|                           |     |    |                |
|---------------------------|-----|----|----------------|
| AGAATCGGACCTAACAGCGGCTT   | 0   | 49 | RDR2-sensitive |
| AGAATCGGGCGAAGACGAAGCCAG  | 0   | 9  | RDR2-sensitive |
| AGAATCGGGTGAAGACGAAGCCAG  | 1   | 12 | RDR2-sensitive |
| AGAATCGGGTGAAGACGAAGCTAG  | 2   | 28 | RDR2-sensitive |
| AGAATCGGGTGAAGACGGAGCCAG  | 0   | 21 | RDR2-sensitive |
| AGAATCTCGGTGATACTTATCTAC  | 0   | 10 | RDR2-sensitive |
| AGAATCTTGCATCGTTGTGGCCTG  | 0   | 15 | RDR2-sensitive |
| AGAATCTTTTAGAGAAGACTGTAA  | 0   | 28 | RDR2-sensitive |
| AGAATCTTTTAGAGGAGACTGTAA  | 2   | 14 | RDR2-sensitive |
| AGAATGACGGATTTTGATACTCAT  | 0   | 33 | RDR2-sensitive |
| AGAATGGACGGCTGAGATCGCAGA  | 1   | 43 | RDR2-sensitive |
| AGAATGGCAGAACGGCAGAACGGC  | 0   | 21 | RDR2-sensitive |
| AGAATGGCAGAACGGCTGGCTACC  | 0   | 9  | RDR2-sensitive |
| AGAATGTCTCGTCATAGTCAACTC  | 17  | 0  | RDR2-resistant |
| AGAATGTCTGGACGCTGGAGATAG  | 0   | 15 | RDR2-sensitive |
| AGAATGTTATATTCGTGTCGTCGC  | 0   | 10 | RDR2-sensitive |
| AGAATGTTGCACAGGATTGTTGGC  | 80  | 10 | RDR2-resistant |
| AGAATGTTGCATATGATTGTTGGC  | 66  | 0  | RDR2-resistant |
| AGAATTGTATGACATGCTTAAATT  | 48  | 0  | RDR2-resistant |
| AGAATTGTTTGGTATCTTAGGCAC  | 15  | 0  | RDR2-resistant |
| AGAATTTGAGCTCAGATGCGCGTT  | 15  | 0  | RDR2-resistant |
| AGAATTTGGGGATCGAGAGGCTAA  | 0   | 10 | RDR2-sensitive |
| AGAATTTGTCAGCAGCTTTATGGA  | 102 | 1  | RDR2-resistant |
| AGAATTTGTGCATATTGTTAGAAC  | 0   | 9  | RDR2-sensitive |
| AGAATTTTCCGGCTACGTA CTGAT | 0   | 10 | RDR2-sensitive |
| AGAATTTTCCGGCTACGTA CTGAT | 0   | 28 | RDR2-sensitive |
| AGACAAAACGGGCAGGGACACCCT  | 0   | 10 | RDR2-sensitive |
| AGACAACGAATTTAGAGTGATGG   | 18  | 0  | RDR2-resistant |
| AGACAAGACAACGGGCAGGGACAC  | 1   | 16 | RDR2-sensitive |
| AGACAAGCCGTGTCGGGTCTGGAC  | 0   | 29 | RDR2-sensitive |
| AGACAAGCTCTGCAACGGCGCACC  | 0   | 13 | RDR2-sensitive |
| AGACAAGGAGATGGTGACCGCTGA  | 0   | 28 | RDR2-sensitive |
| AGACAAGGATGTCGGGTGGAAGGC  | 0   | 10 | RDR2-sensitive |
| AGACAAGGTAGATCGGTAAGCAAC  | 29  | 0  | RDR2-resistant |
| AGACACACGCTAGGATCTCGGAGC  | 0   | 42 | RDR2-sensitive |
| AGACACACGTAGCTCAGCACGGTC  | 0   | 11 | RDR2-sensitive |
| AGACACAGGAGGAGGCAGACTCGG  | 0   | 15 | RDR2-sensitive |
| AGACACCTGGACCTGATCCGGCTC  | 0   | 22 | RDR2-sensitive |
| AGACACGATGGACGGTATGCACGG  | 0   | 12 | RDR2-sensitive |
| AGACACGGAGCACTCTTCTGACGG  | 0   | 16 | RDR2-sensitive |
| AGACACGGATCAAGCATGGACCAT  | 0   | 9  | RDR2-sensitive |
| AGACACGGCGTAGACCAACTGGTA  | 0   | 11 | RDR2-sensitive |
| AGACACGGGATGGCATAATAACAG  | 0   | 11 | RDR2-sensitive |
| AGACACTACTGCACAGAAGCTCTA  | 23  | 2  | RDR2-resistant |
| AGACACTACTTCGGCTACTTCGCG  | 40  | 5  | RDR2-resistant |
| AGACACTCGGCAAAGAACGCGGTT  | 0   | 21 | RDR2-sensitive |
| AGACACTCGGCACAGACTGGTTTG  | 7   | 27 | RDR2-sensitive |
| AGACACTGACAGACATGAGGACGC  | 1   | 17 | RDR2-sensitive |
| AGACAGAAGAGCATAGCTGAGCAA  | 1   | 16 | RDR2-sensitive |

|                           |    |    |                |
|---------------------------|----|----|----------------|
| AGACAGAAGCAGGACGTGACACAA  | 0  | 14 | RDR2-sensitive |
| AGACAGACCGTAGGCACGAGGCAA  | 0  | 11 | RDR2-sensitive |
| AGACAGACGTTATAATGGATTAGT  | 63 | 2  | RDR2-resistant |
| AGACAGAGTGGACACCAGGGGCGA  | 1  | 14 | RDR2-sensitive |
| AGACAGAGTGGATAACCAGGGGCGA | 0  | 11 | RDR2-sensitive |
| AGACAGAGTTAGACGTGTGGTAGA  | 1  | 24 | RDR2-sensitive |
| AGACAGCACGTAGGGACTGGCATC  | 0  | 39 | RDR2-sensitive |
| AGACAGCCGGTACGACATGGAGCT  | 0  | 9  | RDR2-sensitive |
| AGACAGCGGGGTAGATGCGAGCAG  | 0  | 24 | RDR2-sensitive |
| AGACAGCTAGGATTGAGACGTCCG  | 0  | 9  | RDR2-sensitive |
| AGACAGGCATATGTCGGACCTCAA  | 0  | 14 | RDR2-sensitive |
| AGACAGGTCACGGAGCGGTATAAG  | 39 | 1  | RDR2-resistant |
| AGACAGGTCTGTTAGGAACGGTAT  | 0  | 30 | RDR2-sensitive |
| AGACAGTAGTGTAGACGTCCACAA  | 0  | 16 | RDR2-sensitive |
| AGACAGTAGTGTAGACGTCCACAC  | 0  | 9  | RDR2-sensitive |
| AGACAGTAGTGTAGACGTCCACAT  | 0  | 10 | RDR2-sensitive |
| AGACAGTGCTGGAGAATGTGACGC  | 0  | 17 | RDR2-sensitive |
| AGACAGTGGACTCTTCTGGCGGAT  | 0  | 25 | RDR2-sensitive |
| AGACATAGTGTCCGGCACGGTGCGA | 0  | 26 | RDR2-sensitive |
| AGACATCATGGTCCGGGCTAGACGC | 0  | 26 | RDR2-sensitive |
| AGACATGAGTTACTGGGCCGTCCG  | 0  | 13 | RDR2-sensitive |
| AGACATGCAGGGTGACGATGACAT  | 21 | 0  | RDR2-resistant |
| AGACATGTATCTTGACGAAGACAC  | 0  | 20 | RDR2-sensitive |
| AGACATGTTGGACTAGCGTGCGTG  | 1  | 19 | RDR2-sensitive |
| AGACATTCTAACGGCTGGTCTCCG  | 57 | 5  | RDR2-resistant |
| AGACATTGCTGGAGGATGCGACGC  | 0  | 10 | RDR2-sensitive |
| AGACCAACAGTAGATCGGGCCCAT  | 0  | 21 | RDR2-sensitive |
| AGACCAACTCCAGCAAGACTCCGT  | 0  | 15 | RDR2-sensitive |
| AGACCAACTCCGGACGAGAGACGC  | 0  | 13 | RDR2-sensitive |
| AGACCAACTGTAGAGACAGGTCAA  | 0  | 17 | RDR2-sensitive |
| AGACCACAGAACGCGCGCACACAA  | 0  | 9  | RDR2-sensitive |
| AGACCACCAACTCTCAGAAGACAA  | 0  | 44 | RDR2-sensitive |
| AGACCACCAACTCTCAGCAGACAA  | 0  | 13 | RDR2-sensitive |
| AGACCACCGGATCGGAGGAGTTGG  | 0  | 14 | RDR2-sensitive |
| AGACCACCTGAACAGCGTCGGCAA  | 0  | 26 | RDR2-sensitive |
| AGACCAGAGGACAGACCGGCAAAG  | 0  | 9  | RDR2-sensitive |
| AGACCAGATCCGGACGGTCCGGCGT | 2  | 14 | RDR2-sensitive |
| AGACCAGCGACTGCAGCGAAGACC  | 0  | 10 | RDR2-sensitive |
| AGACCAGCGACTGCAGCGAAGGCC  | 3  | 43 | RDR2-sensitive |
| AGACCAGCGGAACGATCTTGTA    | 0  | 9  | RDR2-sensitive |
| AGACCAGGTCGAAGGGCAGGGGCA  | 0  | 46 | RDR2-sensitive |
| AGACCATACGATCAGCGGGCGAGA  | 0  | 30 | RDR2-sensitive |
| AGACCATCTGGACCTGACCTCGGA  | 0  | 14 | RDR2-sensitive |
| AGACCCGAAGACGACGAACTCC    | 0  | 11 | RDR2-sensitive |
| AGACCCGAAGACGGCGAACTCCG   | 6  | 55 | RDR2-sensitive |
| AGACCCGGCACGAATTAGGACCAT  | 1  | 19 | RDR2-sensitive |
| AGACCGACACGTAGGAGGCGCTGT  | 0  | 17 | RDR2-sensitive |
| AGACCGACACGTAGGGGACGCTGT  | 0  | 30 | RDR2-sensitive |
| AGACCGACACGTAGGGGGCGCTGT  | 0  | 16 | RDR2-sensitive |

|                            |    |    |                |
|----------------------------|----|----|----------------|
| AGACCGACTGTTTGGTTACGCGGC   | 0  | 17 | RDR2-sensitive |
| AGACCGAGGCTGTGCGACGCGGAG   | 0  | 9  | RDR2-sensitive |
| AGACCGATCCGAGCAGAGTCTGTT   | 0  | 14 | RDR2-sensitive |
| AGACCGATTCGGACTTTTCGGTGT   | 1  | 14 | RDR2-sensitive |
| AGACCGCACTGCTCGAGGACATGG   | 0  | 31 | RDR2-sensitive |
| AGACCGCAGTAGCAGCCCCTCGGC   | 0  | 9  | RDR2-sensitive |
| AGACCGCGGACCGTTCGGCACCTG   | 0  | 38 | RDR2-sensitive |
| AGACCGCGGATTGTCTGCGCCGGC   | 2  | 73 | RDR2-sensitive |
| AGACCGCTGGACTGTCCGGTATGA   | 0  | 12 | RDR2-sensitive |
| AGACCGGACGGCATGTTTGGACAT   | 0  | 27 | RDR2-sensitive |
| AGACCGGATGACCGAGGCATGCAC   | 0  | 9  | RDR2-sensitive |
| AGACCGGATGTAGAGACGTTCCAA   | 0  | 18 | RDR2-sensitive |
| AGACCGGCAAAGACTAGAGGACAG   | 0  | 33 | RDR2-sensitive |
| AGACCGGGCTGACACGTGCGCCAT   | 0  | 22 | RDR2-sensitive |
| AGACCGGTAGACGCCAAGGGGCAA   | 0  | 11 | RDR2-sensitive |
| AGACCGGTCAGTGGAGCGGCCAAG   | 4  | 35 | RDR2-sensitive |
| AGACCGGTGGATAGACGCATCTGT   | 21 | 0  | RDR2-resistant |
| AGACCGTAGAACGGTAGAACGGTA   | 0  | 9  | RDR2-sensitive |
| AGACCGTAGGGACAGAGGAAGTAA   | 0  | 23 | RDR2-sensitive |
| AGACCGTCCGGACGTACGCAGAGG   | 0  | 36 | RDR2-sensitive |
| AGACCGTGTAGATGTTGACGTCCG   | 0  | 10 | RDR2-sensitive |
| AGACCGTGTCTGGGCTGAAGGCGT   | 2  | 54 | RDR2-sensitive |
| AGACCGTTGGGGTTCGACCGTTGG   | 0  | 12 | RDR2-sensitive |
| AGACCTACGTAGCAGCCTCGGTGT   | 1  | 16 | RDR2-sensitive |
| AGACCTAGACCTGCATAGAACCGG   | 0  | 10 | RDR2-sensitive |
| AGACCTAGCTATGACACTGGCACC   | 0  | 10 | RDR2-sensitive |
| AGACCTATTCAATCGTCGGGTCAG   | 0  | 27 | RDR2-sensitive |
| AGACCTCCATTTTCGTCGAAGCCAA  | 0  | 11 | RDR2-sensitive |
| AGACCTGATCATGTTGGACGGGCC   | 0  | 26 | RDR2-sensitive |
| AGACCTGCGGCAGGTACGAGGACT   | 0  | 10 | RDR2-sensitive |
| AGACCTGGACAGAGATGAGCTGGA   | 0  | 15 | RDR2-sensitive |
| AGACCTGGCCCATGACAGACTCGG   | 0  | 11 | RDR2-sensitive |
| AGACCTGTAGGTGAGAGACCGCCG   | 0  | 51 | RDR2-sensitive |
| AGACCTGTGGTTTGACGTGGAACA   | 0  | 10 | RDR2-sensitive |
| AGACCTTAGGGACTTTGTCTCGT    | 0  | 13 | RDR2-sensitive |
| AGACCTTGTTTCAATTTGTGTCGGAT | 15 | 0  | RDR2-resistant |
| AGACCTTGTTTCGTTTACGTCCGAT  | 6  | 29 | RDR2-sensitive |
| AGACGAACACGGACGTGGCGAGGC   | 0  | 21 | RDR2-sensitive |
| AGACGAACAGGGCAACAGACGAAC   | 0  | 17 | RDR2-sensitive |
| AGACGAAGACCGGGACGAAGGCAT   | 0  | 21 | RDR2-sensitive |
| AGACGAAGAGCGGACGGATTCTGA   | 0  | 10 | RDR2-sensitive |
| AGACGAAGCGTCCGTTCCGGCCTAG  | 0  | 11 | RDR2-sensitive |
| AGACGAAGCTATGAATACTGCATT   | 0  | 11 | RDR2-sensitive |
| AGACGAAGGGACGACAGTGCACAA   | 0  | 9  | RDR2-sensitive |
| AGACGACAAGGCTGAAGAGTGCAA   | 0  | 15 | RDR2-sensitive |
| AGACGACGAACCTCGCAGAGGATGC  | 0  | 32 | RDR2-sensitive |
| AGACGACGCCTACCGCTCTGACGG   | 0  | 31 | RDR2-sensitive |
| AGACGACGCGACTGAGCATGGTGA   | 0  | 9  | RDR2-sensitive |
| AGACGACGGACAGACTTACCCTTC   | 0  | 12 | RDR2-sensitive |

|                            |   |    |                |
|----------------------------|---|----|----------------|
| AGACGACGGCCTAGACCTCTCACG   | 0 | 10 | RDR2-sensitive |
| AGACGACGGCCTAGACCTCTCCAA   | 0 | 11 | RDR2-sensitive |
| AGACGACGGCTTGACAATTGGAC    | 0 | 12 | RDR2-sensitive |
| AGACGACGTAAACACGGGAGCTGC   | 0 | 12 | RDR2-sensitive |
| AGACGACGTATTCGACGAGGACAG   | 0 | 27 | RDR2-sensitive |
| AGACGACTCGAACTCGGGGTGGCT   | 0 | 10 | RDR2-sensitive |
| AGACGACTCGTAGTGTTCGGTAT    | 0 | 16 | RDR2-sensitive |
| AGACGACTGGCAGACGTTACCCTT   | 0 | 10 | RDR2-sensitive |
| AGACGACTGGCAGACTTACCCTTC   | 0 | 27 | RDR2-sensitive |
| AGACGACTGGCAGATTTACCCTTC   | 1 | 26 | RDR2-sensitive |
| AGACGACTGGGAGATTGCATGTTA   | 0 | 12 | RDR2-sensitive |
| AGACGAGAGTGGAGGCGAGAGCTG   | 0 | 15 | RDR2-sensitive |
| AGACGAGATGGTACCAGGACGTGC   | 0 | 11 | RDR2-sensitive |
| AGACGAGCTCGTAGAGGAAGACGC   | 0 | 11 | RDR2-sensitive |
| AGACGATAGTGTAGACCAGGCACA   | 0 | 10 | RDR2-sensitive |
| AGACGATCCACGTCAGGTAGTCGG   | 0 | 12 | RDR2-sensitive |
| AGACGATGCGTTGGATAGTCGGAT   | 0 | 9  | RDR2-sensitive |
| AGACGATGGACTGACAGCGATGGC   | 0 | 9  | RDR2-sensitive |
| AGACGCAGGCGACAGACAACTCC    | 0 | 10 | RDR2-sensitive |
| AGACGCAGGCTGCATGAGCGGATA   | 0 | 10 | RDR2-sensitive |
| AGACGCATAGACGGTAGGGCAGGT   | 0 | 15 | RDR2-sensitive |
| AGACGCATGGAACAGGCACCGGAC   | 0 | 10 | RDR2-sensitive |
| AGACGCCGATGGGAACCGACGGAC   | 1 | 12 | RDR2-sensitive |
| AGACGCCGATGGGAACCTGACGGAC  | 0 | 10 | RDR2-sensitive |
| AGACGCCTCTGAACGACGGAGATG   | 1 | 13 | RDR2-sensitive |
| AGACGCCTCTGAACGACGTAGAAC   | 0 | 11 | RDR2-sensitive |
| AGACCGATGGTAGAACGTGGCGC    | 1 | 17 | RDR2-sensitive |
| AGACCGGTTGAGATCGGACATGAC   | 0 | 12 | RDR2-sensitive |
| AGACGCTTACAGAGCACGGGACGT   | 0 | 14 | RDR2-sensitive |
| AGACGCTTCGGACTTGGTGC GGCT  | 1 | 13 | RDR2-sensitive |
| AGACGGAAAACGGTAGACGGACGG   | 0 | 10 | RDR2-sensitive |
| AGACGGAAATCCTCCGGGGTTCGGC  | 0 | 13 | RDR2-sensitive |
| AGACGGAAAGTCTCTCGAGGTTCGGC | 2 | 18 | RDR2-sensitive |
| AGACGGACAGAACAGTGATAGCGG   | 0 | 15 | RDR2-sensitive |
| AGACGGACCGAGGCTACAACCTGC   | 0 | 12 | RDR2-sensitive |
| AGACGGACCTAGGTCGGGCCTCAA   | 0 | 17 | RDR2-sensitive |
| AGACGGACGCTGGACGCAGGAAGC   | 0 | 58 | RDR2-sensitive |
| AGACGGACGGAACAGTGATAGCGG   | 0 | 12 | RDR2-sensitive |
| AGACGGAGACAGAGTTAGACGTGT   | 0 | 24 | RDR2-sensitive |
| AGACGGAGACTGAGTCAGACGAGT   | 0 | 11 | RDR2-sensitive |
| AGACGGAGTGGTAGTGGAGGGGAC   | 5 | 22 | RDR2-sensitive |
| AGACGGATACGGAGAGGAGAGAGA   | 1 | 14 | RDR2-sensitive |
| AGACGGATACGGAGTCTGCTGGAC   | 0 | 9  | RDR2-sensitive |
| AGACGGATCTAGACGACGTAGAGT   | 0 | 18 | RDR2-sensitive |
| AGACGGATCTAGATCAGGCCTCAA   | 0 | 10 | RDR2-sensitive |
| AGACGGATCTAGCTAGACGACGTA   | 0 | 33 | RDR2-sensitive |
| AGACGGCAGAACGGCAGAACACGT   | 1 | 24 | RDR2-sensitive |
| AGACGGCATAGAGAACGTTTCGTA   | 0 | 9  | RDR2-sensitive |
| AGACGGCCTGAGTGGGACGGTTGG   | 1 | 13 | RDR2-sensitive |



|                           |    |    |                |
|---------------------------|----|----|----------------|
| AGACGGCTCTAAGATTATTTTGCA  | 0  | 11 | RDR2-sensitive |
| AGACGGCTCTAAGATTTTTTTGCA  | 3  | 16 | RDR2-sensitive |
| AGACGGCTGAGATCGCAGAATGGC  | 0  | 20 | RDR2-sensitive |
| AGACGGCTGCTGACGGTCCTTTGC  | 12 | 35 | RDR2-sensitive |
| AGACGGCTGTTGACGGTCCTTGGC  | 0  | 29 | RDR2-sensitive |
| AGACGGGCAACAGATTATTGGCAT  | 0  | 13 | RDR2-sensitive |
| AGACGGGCGTGAGAGAGGTGGAAA  | 0  | 16 | RDR2-sensitive |
| AGACGGGCTCTCGGTGTTGTTGAA  | 14 | 0  | RDR2-resistant |
| AGACGGGGAGGAGGAACAGAAGAA  | 19 | 0  | RDR2-resistant |
| AGACGGGGGCTTTGGCAGAACTGC  | 0  | 23 | RDR2-sensitive |
| AGACGGGTACGGGTTGGA ACTACC | 0  | 10 | RDR2-sensitive |
| AGACGGGTGGTGG AATATAGGCTT | 0  | 14 | RDR2-sensitive |
| AGACGGTACAGAGCATT CATGCAC | 3  | 20 | RDR2-sensitive |
| AGACGGTAGACGGTTTTACTTTTA  | 0  | 21 | RDR2-sensitive |
| AGACGGTAGTGTAGACCAGGCACA  | 0  | 20 | RDR2-sensitive |
| AGACGGTATGGACCTAACTCAGGA  | 0  | 9  | RDR2-sensitive |
| AGACGGTCACAAGATGCGACTGAA  | 0  | 15 | RDR2-sensitive |
| AGACGGTCAGTGTCTGACGGTC    | 0  | 17 | RDR2-sensitive |
| AGACGGTCTGTGCTGCTACGGTGG  | 0  | 11 | RDR2-sensitive |
| AGACGGTCTGTGTCTGGTGATCGG  | 3  | 40 | RDR2-sensitive |
| AGACGGTGGACTGTTTCGTGATGGC | 0  | 12 | RDR2-sensitive |
| AGACGGTGGAGACAGACAGAGGAC  | 0  | 23 | RDR2-sensitive |
| AGACGGTGT CATCGTAGGATCCGG | 0  | 10 | RDR2-sensitive |
| AGACGGTGTGGGACAAGGCAAGAA  | 0  | 9  | RDR2-sensitive |
| AGACGGTATTTGGACTGTTGTAG   | 0  | 9  | RDR2-sensitive |
| AGACGGTTCATAGGTGCCCTGTTC  | 79 | 1  | RDR2-resistant |
| AGACGGTTGGCTCGGACCTGGCAC  | 0  | 12 | RDR2-sensitive |
| AGACGGTTTGTGACTTAGGGTCGG  | 0  | 11 | RDR2-sensitive |
| AGACGGTTTTACTTTTATGACGCT  | 2  | 17 | RDR2-sensitive |
| AGACGTACGCTAGTAGAGACGAAT  | 0  | 10 | RDR2-sensitive |
| AGACGTACGGATGTAGTTCGGGCTC | 0  | 16 | RDR2-sensitive |
| AGACGTACGTAGAGGAGAAGCTGC  | 0  | 15 | RDR2-sensitive |
| AGACGTACTCTGCCTTGCTCGAGA  | 1  | 13 | RDR2-sensitive |
| AGACGTAGACCACATGACCGGATG  | 0  | 9  | RDR2-sensitive |
| AGACGTAGAGTCAGACGACGTTGC  | 0  | 10 | RDR2-sensitive |
| AGACGTAGTTAATGCGATCGGACA  | 0  | 16 | RDR2-sensitive |
| AGACGTATGTAGAGGAGGAGTCGC  | 0  | 13 | RDR2-sensitive |
| AGACGTCCGAATGTGGTCCGGCTC  | 1  | 12 | RDR2-sensitive |
| AGACGTCCGACGAAAACGATGGTA  | 0  | 14 | RDR2-sensitive |
| AGACGTCCGGATGTGGTTCGGCTC  | 5  | 38 | RDR2-sensitive |
| AGACGTCTAGACCTGATCCGGCTC  | 0  | 52 | RDR2-sensitive |
| AGACGTCTGAACCTAGTCCGGCTC  | 1  | 23 | RDR2-sensitive |
| AGACGTCTGAACCTGGTCCGGCTC  | 1  | 66 | RDR2-sensitive |
| AGACGTCTGAATGTGGTCCGGCTC  | 2  | 17 | RDR2-sensitive |
| AGACGTCTGGACATGATCCGGCTC  | 1  | 16 | RDR2-sensitive |
| AGACGTCTGGACCTAGTTCGGCTC  | 0  | 9  | RDR2-sensitive |
| AGACGTCTGGACCTGATCCGGCTC  | 0  | 11 | RDR2-sensitive |
| AGACGTCTGGACCTGGTCCGGCTC  | 15 | 75 | RDR2-sensitive |
| AGACGTCTGGACCTGGTTCGGCTC  | 0  | 15 | RDR2-sensitive |

|                            |    |     |                |
|----------------------------|----|-----|----------------|
| AGACGTCTGGATCTGGTCCGGCTC   | 0  | 10  | RDR2-sensitive |
| AGACGTCTGGTTGTGGTCCGGCTC   | 1  | 19  | RDR2-sensitive |
| AGACGTGACTGCATATGTCTGACC   | 0  | 12  | RDR2-sensitive |
| AGACGTGATAGGCCTGAGGTGCAT   | 1  | 24  | RDR2-sensitive |
| AGACGTGGAATAGGAGCGAGCAAC   | 0  | 11  | RDR2-sensitive |
| AGACGTGGTTGGGCTGACGACGGA   | 0  | 9   | RDR2-sensitive |
| AGACGTGTGGATCTGATCCGGCTC   | 0  | 11  | RDR2-sensitive |
| AGACGTGTTCTCGGCTGCTCGGCT   | 1  | 15  | RDR2-sensitive |
| AGACGTTAGACCTGAGATGGATGG   | 0  | 12  | RDR2-sensitive |
| AGACGTTGGGTTTGTACCGGTAA    | 17 | 1   | RDR2-resistant |
| AGACTAAAATTGAATCGAACGGTG   | 48 | 4   | RDR2-resistant |
| AGACTACAGCGCTCAAGCCGGCAT   | 0  | 30  | RDR2-sensitive |
| AGACTACAGTAGCGACGATCCGGC   | 0  | 22  | RDR2-sensitive |
| AGACTACGAGAGATGAGACGACAC   | 0  | 9   | RDR2-sensitive |
| AGACTACGAGTGAATGAGCCGAC    | 0  | 11  | RDR2-sensitive |
| AGACTACTGTCTCGTCCGACGGCCCA | 69 | 3   | RDR2-resistant |
| AGACTAGAACGATGGAAGTGGCAT   | 0  | 40  | RDR2-sensitive |
| AGACTAGACTACCACGGCCTGAAA   | 0  | 12  | RDR2-sensitive |
| AGACTAGATCTGAGGGACTGACGG   | 0  | 30  | RDR2-sensitive |
| AGACTAGCAGACTTCGACAGAGCC   | 0  | 10  | RDR2-sensitive |
| AGACTAGTATGTTCAATGCGGCTT   | 0  | 9   | RDR2-sensitive |
| AGACTAGTCTATCAGCCTGACGTC   | 0  | 10  | RDR2-sensitive |
| AGACTATAGTGTAGGCGTTCATGA   | 0  | 16  | RDR2-sensitive |
| AGACTATCAACTGTAGACGGCTGC   | 0  | 30  | RDR2-sensitive |
| AGACTATGAGAGATGAGACGACAC   | 0  | 14  | RDR2-sensitive |
| AGACTATGGTGGCAGAACACGGAA   | 0  | 15  | RDR2-sensitive |
| AGACTCAACTCTGTACTAATGGGC   | 0  | 10  | RDR2-sensitive |
| AGACTCACCTGAACCTGGAGCCGT   | 0  | 22  | RDR2-sensitive |
| AGACTCACTGGACCAGCTGGAAGA   | 2  | 37  | RDR2-sensitive |
| AGACTCACTGGACCAGCTGGAGGA   | 0  | 10  | RDR2-sensitive |
| AGACTCAGAGGTGTAGAGAAGGCA   | 0  | 10  | RDR2-sensitive |
| AGACTCATACAAGCGCGGAACAGT   | 0  | 9   | RDR2-sensitive |
| AGACTCATCGGCAGCAGACCAACA   | 0  | 27  | RDR2-sensitive |
| AGACTCATGAGCTCTGAAGAGGCT   | 22 | 0   | RDR2-resistant |
| AGACTCATGATCGAGCGGCTTGAA   | 0  | 16  | RDR2-sensitive |
| AGACTCATGTTGGTCTGTGGGCAT   | 0  | 10  | RDR2-sensitive |
| AGACTCCGATGGGAACCGACGGAC   | 1  | 22  | RDR2-sensitive |
| AGACTCCGGACAGTGTGAGCGGTG   | 0  | 20  | RDR2-sensitive |
| AGACTCGACTCGGCTCGATAACGG   | 0  | 11  | RDR2-sensitive |
| AGACTCGCGTAGGACAGTTCGGCT   | 1  | 17  | RDR2-sensitive |
| AGACTCGCTGCGGAAGGTCGTCAC   | 0  | 28  | RDR2-sensitive |
| AGACTCGCTGGACCAGCTGGAAGA   | 0  | 22  | RDR2-sensitive |
| AGACTCGGACAGGAAATTAGGCAC   | 0  | 13  | RDR2-sensitive |
| AGACTCGGACGTGAGCGACGGAAT   | 0  | 14  | RDR2-sensitive |
| AGACTCGGTGAACTGTAAATCGGC   | 0  | 25  | RDR2-sensitive |
| AGACTCGTAGATGCAAGGACTGGA   | 0  | 16  | RDR2-sensitive |
| AGACTCGTGTTGGTCTGTGCGGAT   | 1  | 21  | RDR2-sensitive |
| AGACTCGTGTTGGTCTGTGGGGAC   | 0  | 18  | RDR2-sensitive |
| AGACTCTAGAGCGTATTGGACGGT   | 2  | 101 | RDR2-sensitive |

|                           |     |    |                |
|---------------------------|-----|----|----------------|
| AGACTCTAGAGCGTATTGGATGGT  | 0   | 20 | RDR2-sensitive |
| AGACTCTAGGCCGTATTGGACGGT  | 0   | 9  | RDR2-sensitive |
| AGACTCTCGGCAACGCGGCTCTTT  | 1   | 30 | RDR2-sensitive |
| AGACTCTCTGGTAGACCTAGGCAT  | 0   | 28 | RDR2-sensitive |
| AGACTCTGACTCGGGCTAGACTGC  | 1   | 19 | RDR2-sensitive |
| AGACTCTGAGAATAGTTGCTGCTG  | 136 | 1  | RDR2-resistant |
| AGACTCTGCTCGGATCGGTCTAAG  | 1   | 17 | RDR2-sensitive |
| AGACTCTGTAGATATGAGCAGATT  | 0   | 9  | RDR2-sensitive |
| AGACTCTGTCAACCTCGTAAAGA   | 18  | 0  | RDR2-resistant |
| AGACTCTGTGCAGCCAGGATCGAC  | 0   | 22 | RDR2-sensitive |
| AGACTCTTGCGGCAACTCTCTTAG  | 0   | 13 | RDR2-sensitive |
| AGACTCTTTAGACGCATTGACTAT  | 0   | 20 | RDR2-sensitive |
| AGACTCTTTGGCATGTGAGGGCTG  | 0   | 11 | RDR2-sensitive |
| AGACTGAACTGCTGCAGCGAGCAC  | 0   | 28 | RDR2-sensitive |
| AGACTGACACGTAGGAGGCGCTGT  | 0   | 10 | RDR2-sensitive |
| AGACTGACGGCCGTCAGCTCTGGG  | 0   | 23 | RDR2-sensitive |
| AGACTGACGGTCGTCAGCTGTAGA  | 0   | 11 | RDR2-sensitive |
| AGACTGACTCAGAGGGGCTGCTGC  | 0   | 16 | RDR2-sensitive |
| AGACTGACTGCAACGCATGCCTCT  | 0   | 19 | RDR2-sensitive |
| AGACTGACTGCAACGCTTGCCTCT  | 0   | 13 | RDR2-sensitive |
| AGACTGACTGCATGCGTTGACCAA  | 0   | 11 | RDR2-sensitive |
| AGACTGACTGGCAGACTGACCTGC  | 0   | 15 | RDR2-sensitive |
| AGACTGACTTAGACGGATTTAGAT  | 0   | 23 | RDR2-sensitive |
| AGACTGAGACGGAGGACGAGAGTC  | 0   | 15 | RDR2-sensitive |
| AGACTGAGCGCGTGCATTGACCAA  | 0   | 10 | RDR2-sensitive |
| AGACTGAGGCTATCTTGTTCCGGC  | 0   | 10 | RDR2-sensitive |
| AGACTGATGTTGTAGCTTCATATG  | 50  | 2  | RDR2-resistant |
| AGACTGATTCAGCGTCCGCTTGCC  | 44  | 0  | RDR2-resistant |
| AGACTGCACTACTCGTAGAAGGTG  | 0   | 12 | RDR2-sensitive |
| AGACTGCACTGCGTACATCTGCCT  | 2   | 20 | RDR2-sensitive |
| AGACTGCAGAGTCGACATCGCCAC  | 0   | 9  | RDR2-sensitive |
| AGACTGCATCGACTCTATACGGCT  | 1   | 48 | RDR2-sensitive |
| AGACTGCATGCGGAGTGGGATGGG  | 1   | 17 | RDR2-sensitive |
| AGACTGCCAGTGAACGGTCCGGCGT | 0   | 12 | RDR2-sensitive |
| AGACTGCCTGACACTGAAGCGGTT  | 0   | 17 | RDR2-sensitive |
| AGACTGCGAGACGGAACGACCGAT  | 0   | 10 | RDR2-sensitive |
| AGACTGCGGACGTGACGGCGTGAC  | 0   | 12 | RDR2-sensitive |
| AGACTGCGGACGTGACGGCTTGAC  | 0   | 10 | RDR2-sensitive |
| AGACTGCTGACTGTACGGCTGTAC  | 0   | 23 | RDR2-sensitive |
| AGACTGCTGAGGGTATTAAGAGTA  | 32  | 0  | RDR2-resistant |
| AGACTGCTGGAGAGCGAAACGGTG  | 0   | 14 | RDR2-sensitive |
| AGACTGCTGTAGACGGCCTTAGGA  | 0   | 17 | RDR2-sensitive |
| AGACTGCTTGCAGCGATTGTCGTT  | 0   | 15 | RDR2-sensitive |
| AGACTGGACCGGCCCGACACGAAT  | 0   | 9  | RDR2-sensitive |
| AGACTGGACCTGAGCGCGGCTGAC  | 0   | 12 | RDR2-sensitive |
| AGACTGGACTAGGCAACCAAACAC  | 1   | 13 | RDR2-sensitive |
| AGACTGGACTGCTAATTAGGCCGT  | 0   | 11 | RDR2-sensitive |
| AGACTGGACTGGCTGAGTGCATGC  | 0   | 22 | RDR2-sensitive |
| AGACTGGAGGCGACGAAGGCTGTA  | 0   | 9  | RDR2-sensitive |

|                           |    |     |                |
|---------------------------|----|-----|----------------|
| AGACTGGAGGCGACGACGGTTATA  | 0  | 15  | RDR2-sensitive |
| AGACTGGAGTAGAGGCCGAAGGTA  | 0  | 12  | RDR2-sensitive |
| AGACTGGCCGAGCCGATCGACGTT  | 3  | 40  | RDR2-sensitive |
| AGACTGGGACCGGCTGCATGCAAG  | 0  | 9   | RDR2-sensitive |
| AGACTGGGATCCATGGAAGGACGC  | 0  | 40  | RDR2-sensitive |
| AGACTGGGCCAGGCAACCAAACAT  | 0  | 14  | RDR2-sensitive |
| AGACTGGGCTGGATTCTAAGCCGG  | 0  | 15  | RDR2-sensitive |
| AGACTGGGGCAGAACGCGGAATGG  | 0  | 25  | RDR2-sensitive |
| AGACTGGTAGATGCAAGGACTGGA  | 0  | 21  | RDR2-sensitive |
| AGACTGGTCAGTGGAGCGGTGGAG  | 2  | 16  | RDR2-sensitive |
| AGACTGGTGAACAAGGAAGCCGC   | 0  | 44  | RDR2-sensitive |
| AGACTGGTGGGAAGCTACATCCTC  | 0  | 12  | RDR2-sensitive |
| AGACTGGTTCGGATGACGTCAGAT  | 0  | 9   | RDR2-sensitive |
| AGACTGTAAAAGACGGATATAGAG  | 1  | 16  | RDR2-sensitive |
| AGACTGTAAAGAACGGATATAGAG  | 0  | 11  | RDR2-sensitive |
| AGACTGTAAAGGACGGATATAGAG  | 1  | 128 | RDR2-sensitive |
| AGACTGTAAAGTACGGATATAGAG  | 0  | 15  | RDR2-sensitive |
| AGACTGTAAATGACGGATATAGAG  | 0  | 17  | RDR2-sensitive |
| AGACTGTAAATTTTAGAGGACGTT  | 0  | 9   | RDR2-sensitive |
| AGACTGTAAAGGGTAGGCTGCCTC  | 0  | 18  | RDR2-sensitive |
| AGACTGTAAATAAGAGTATTGGCT  | 0  | 59  | RDR2-sensitive |
| AGACTGTACAACGGCTCCCGCAGC  | 0  | 13  | RDR2-sensitive |
| AGACTGTACACTAGACCATGGCAC  | 0  | 16  | RDR2-sensitive |
| AGACTGTACGGTGACCTACCACGG  | 0  | 13  | RDR2-sensitive |
| AGACTGTACTATTCGCATATTCAA  | 0  | 9   | RDR2-sensitive |
| AGACTGTACTGAGGACGACGTCTC  | 0  | 10  | RDR2-sensitive |
| AGACTGTACTGTTTCGCATAGTGAA | 1  | 22  | RDR2-sensitive |
| AGACTGTACTGTTTCGCGGAGTCGA | 0  | 29  | RDR2-sensitive |
| AGACTGTACTGTTTCGTAGAGTGGA | 2  | 17  | RDR2-sensitive |
| AGACTGTAGCATGGTGTACTTTGT  | 0  | 38  | RDR2-sensitive |
| AGACTGTAGCGGCCACGTCACTC   | 0  | 25  | RDR2-sensitive |
| AGACTGTAGGTTGGAGACGAGCAC  | 0  | 23  | RDR2-sensitive |
| AGACTGTAGTGTTACATAACGGA   | 0  | 13  | RDR2-sensitive |
| AGACTGTATCTAGCATAGGGTGGG  | 0  | 12  | RDR2-sensitive |
| AGACTGTATGGACCGACGCAGAGA  | 0  | 23  | RDR2-sensitive |
| AGACTGTATTTCCGGTCCGAGCAG  | 0  | 39  | RDR2-sensitive |
| AGACTGTCCATGTCTGGAGCTCGG  | 2  | 43  | RDR2-sensitive |
| AGACTGTCCGGTGAGAAGCTGCAC  | 0  | 12  | RDR2-sensitive |
| AGACTGTACGACGCACTACTACCGT | 0  | 12  | RDR2-sensitive |
| AGACTGTACGACGCACTGCTGGCAT | 0  | 19  | RDR2-sensitive |
| AGACTGTCTGCAGCGTTTGACGTT  | 0  | 18  | RDR2-sensitive |
| AGACTGTCTTCAACGGATGACGCT  | 0  | 29  | RDR2-sensitive |
| AGACTGTCTTGAGTAGACCGTGTA  | 0  | 17  | RDR2-sensitive |
| AGACTGTGGACGCCTACGTTGTCT  | 0  | 9   | RDR2-sensitive |
| AGACTGTGGAGGCTTACAACACTG  | 0  | 14  | RDR2-sensitive |
| AGACTGTGGGAGCGGCGGGACCTT  | 0  | 9   | RDR2-sensitive |
| AGACTGTGGGTGCAACATCGGCGT  | 0  | 21  | RDR2-sensitive |
| AGACTGTGGTAAGCATGCAATGTC  | 47 | 2   | RDR2-resistant |
| AGACTGTGGTGCACGGTTCTGCCT  | 1  | 18  | RDR2-sensitive |

|                           |    |    |                |
|---------------------------|----|----|----------------|
| AGACTGTGTAGAGGGAGCGGGAGC  | 0  | 9  | RDR2-sensitive |
| AGACTGTGTAGCCGGAGCCGGTGA  | 0  | 9  | RDR2-sensitive |
| AGACTGTGTATCTGGAGCAGCAGG  | 0  | 10 | RDR2-sensitive |
| AGACTGTGTATGACCGAATGACGC  | 0  | 13 | RDR2-sensitive |
| AGACTGTGTGCATGTGTTGGCTGC  | 0  | 15 | RDR2-sensitive |
| AGACTGTGTGTAAGGCTATCTCCA  | 5  | 22 | RDR2-sensitive |
| AGACTGTGTGTGTGTGTGGGCCGG  | 0  | 11 | RDR2-sensitive |
| AGACTGTTACAGGAGGCTTCGGCT  | 0  | 17 | RDR2-sensitive |
| AGACTGTTGCAGAGTGGACGGTTG  | 0  | 19 | RDR2-sensitive |
| AGACTGTTGCATCTAATGACTGCA  | 0  | 27 | RDR2-sensitive |
| AGACTGTTGCTGACGGCTCTTTGC  | 0  | 14 | RDR2-sensitive |
| AGACTGTTGTAGATGGCAAGATAT  | 33 | 0  | RDR2-resistant |
| AGACTGTTGTAGCTATCCGCAGAG  | 0  | 20 | RDR2-sensitive |
| AGACTGTTGTCTTTATTGCAGAGT  | 0  | 11 | RDR2-sensitive |
| AGACTGTTTGAATGTTTCGGCTAA  | 0  | 9  | RDR2-sensitive |
| AGACTGTTTGTTCCTCTTAGGA    | 0  | 19 | RDR2-sensitive |
| AGACTGTTTTACTTTTATGACGGT  | 0  | 90 | RDR2-sensitive |
| AGACTTAACCGAACTATGTTGGCA  | 0  | 10 | RDR2-sensitive |
| AGACTTAACTGTAGAGGAGGCCAA  | 0  | 11 | RDR2-sensitive |
| AGACTTAATGGATCGTACGTCGGA  | 0  | 11 | RDR2-sensitive |
| AGACTTACTGATTGTTGGCGCGCG  | 14 | 36 | RDR2-sensitive |
| AGACTTAGGGCCCTGACGACGTGC  | 1  | 52 | RDR2-sensitive |
| AGACTTATTTCCGACGGCTGGCCC  | 0  | 20 | RDR2-sensitive |
| AGACTTATTTGTGTTGGACGCCA   | 0  | 13 | RDR2-sensitive |
| AGACTTCAATCGAAGATCGTCGTC  | 5  | 24 | RDR2-sensitive |
| AGACTTCAATCGAAGATCGTCGTT  | 1  | 26 | RDR2-sensitive |
| AGACTTCAATCGAAGGTCGTCGTC  | 13 | 42 | RDR2-sensitive |
| AGACTTCAATTGAAGGTCGTCGTT  | 0  | 11 | RDR2-sensitive |
| AGACTTCCTCTGCTGCGTCGGTAC  | 0  | 46 | RDR2-sensitive |
| AGACTTCGGTCGGATTCGGGTCTG  | 0  | 16 | RDR2-sensitive |
| AGACTTCTACCCACGGACGGACAT  | 0  | 21 | RDR2-sensitive |
| AGACTTGCTCGGCCGGGAGACATGA | 0  | 13 | RDR2-sensitive |
| AGACTTGGACAGAGCACAAGACAT  | 0  | 28 | RDR2-sensitive |
| AGACTTGGACAGGAAGAAGAGCAG  | 0  | 11 | RDR2-sensitive |
| AGACTTGGGACTTGATGGCCTTCC  | 9  | 38 | RDR2-sensitive |
| AGACTTGTCGGTCTGATTGCCTGA  | 0  | 9  | RDR2-sensitive |
| AGACTTGTTCTGAGCGTTGAGTCA  | 0  | 66 | RDR2-sensitive |
| AGACTTTAGTCTCATATCGTCCAT  | 0  | 9  | RDR2-sensitive |
| AGACTTTATTTGGACATTGTCGGT  | 0  | 15 | RDR2-sensitive |
| AGACTTTCTTTTCGTCGGAGGCCGA | 0  | 11 | RDR2-sensitive |
| AGACTTTGGTACACGGACGAGCAC  | 0  | 9  | RDR2-sensitive |
| AGACTTTGTTTGATTACGTCGGAT  | 0  | 16 | RDR2-sensitive |
| AGAGAACTGAGGAAGTCTTGGCT   | 22 | 2  | RDR2-resistant |
| AGAGAACACTGACGTGGCACGTGA  | 0  | 19 | RDR2-sensitive |
| AGAGAACACTGTCGTCGGTACACC  | 0  | 15 | RDR2-sensitive |
| AGAGAACCAGGCTCAAGAGAACAC  | 0  | 15 | RDR2-sensitive |
| AGAGAACC CGCGCATCGTTGGTCA | 2  | 19 | RDR2-sensitive |
| AGAGAACCGTTTAGAGGACGCTGC  | 1  | 53 | RDR2-sensitive |
| AGAGAACCACAGAGCAAGTGGCGC  | 0  | 9  | RDR2-sensitive |

|                          |    |     |                |
|--------------------------|----|-----|----------------|
| AGAGAACGCGGAAATACTGTTTAT | 25 | 0   | RDR2-resistant |
| AGAGAACGCGGCACGTACTCTAGA | 0  | 17  | RDR2-sensitive |
| AGAGAACGCTGACGTGGCACGTGA | 6  | 279 | RDR2-sensitive |
| AGAGAACGCTGACGTGGCATGTGA | 0  | 15  | RDR2-sensitive |
| AGAGAACGCTGCTGGAGGACGTAG | 0  | 58  | RDR2-sensitive |
| AGAGAACGGCGTTGGCACTGCTGC | 0  | 18  | RDR2-sensitive |
| AGAGAACGTTGCTGGAGACAGCCT | 1  | 14  | RDR2-sensitive |
| AGAGAACGTTGCTGGAGATGGAGA | 0  | 9   | RDR2-sensitive |
| AGAGAACGTTGCTGTAGCGAGTAG | 0  | 12  | RDR2-sensitive |
| AGAGAACTCGGAATGGGAGGGCGT | 0  | 11  | RDR2-sensitive |
| AGAGAACTGAGTGGCGACGGACAG | 1  | 12  | RDR2-sensitive |
| AGAGAACTGTTTAGAGGACGCTAC | 0  | 13  | RDR2-sensitive |
| AGAGAAGACTGCCGCTGCTCTCTG | 0  | 17  | RDR2-sensitive |
| AGAGAAGACTGGCTCCTACCGCAG | 1  | 12  | RDR2-sensitive |
| AGAGAAGACTGTAAGAGACGGATA | 1  | 58  | RDR2-sensitive |
| AGAGAAGACTGTAAAGAACGGATA | 0  | 33  | RDR2-sensitive |
| AGAGAAGACTGTAAAGGACGGATA | 4  | 445 | RDR2-sensitive |
| AGAGAAGACTGTAAAGGACGGATT | 0  | 9   | RDR2-sensitive |
| AGAGAAGACTGTAAAGTACGGATA | 1  | 31  | RDR2-sensitive |
| AGAGAAGTAGAGGCTCATCGTCGC | 0  | 9   | RDR2-sensitive |
| AGAGAATCCAGCAGCGTCCTCTAA | 0  | 19  | RDR2-sensitive |
| AGAGAATCTCGCTGACCAGGATGA | 0  | 13  | RDR2-sensitive |
| AGAGACAGACGACCAGGAGACCTC | 0  | 15  | RDR2-sensitive |
| AGAGACAGAGGAAGGGAGTGGACA | 0  | 9   | RDR2-sensitive |
| AGAGACAGGTGCACATCTGACGGT | 0  | 81  | RDR2-sensitive |
| AGAGACAGTAGAGGACCGGCCAG  | 0  | 11  | RDR2-sensitive |
| AGAGACAGTCGCGTATGACAGCAA | 0  | 11  | RDR2-sensitive |
| AGAGACAGTTGTAGCATTATCTT  | 1  | 18  | RDR2-sensitive |
| AGAGACATCGGACCGTGATGTGCC | 0  | 9   | RDR2-sensitive |
| AGAGACCAGGAGCGACATCTGCAT | 0  | 11  | RDR2-sensitive |
| AGAGACCGAACCGGCAGAACAACA | 0  | 35  | RDR2-sensitive |
| AGAGACCGGTACGGATTATGTCAT | 0  | 11  | RDR2-sensitive |
| AGAGACCGGTATGCACACTCTCTC | 0  | 13  | RDR2-sensitive |
| AGAGACGAGAGTGGAGGCGAGAGC | 0  | 19  | RDR2-sensitive |
| AGAGACGCAGTAGTGCAAGATGAT | 0  | 9   | RDR2-sensitive |
| AGAGACGCGGATATGCTGGCGGGC | 0  | 15  | RDR2-sensitive |
| AGAGACGGACTCTTCGCGAAGAAC | 0  | 15  | RDR2-sensitive |
| AGAGACGGAGTATGCTTGCGACAT | 0  | 13  | RDR2-sensitive |
| AGAGACGGATCCAAGACGGTACTC | 0  | 29  | RDR2-sensitive |
| AGAGACGGCCGTAGGAAGTTAGCA | 0  | 9   | RDR2-sensitive |
| AGAGACGGGAGGACGGAGCATCGC | 0  | 13  | RDR2-sensitive |
| AGAGACGGGGAGGAGGAACAGAAG | 19 | 1   | RDR2-resistant |
| AGAGACGGGGTGGTAGGCGGGCGA | 0  | 9   | RDR2-sensitive |
| AGAGACGGTGTAGAGACGAACAGC | 0  | 12  | RDR2-sensitive |
| AGAGACGTACGTACAGAGCATCCA | 0  | 32  | RDR2-sensitive |
| AGAGACGTCATCAGATTTGTGGAG | 0  | 10  | RDR2-sensitive |
| AGAGACGTCTTAGGTGATCTGCCG | 0  | 12  | RDR2-sensitive |
| AGAGACGTCTTGATGGCCTGCCG  | 0  | 9   | RDR2-sensitive |
| AGAGACGTGATAGGCCTGAGGTGC | 0  | 10  | RDR2-sensitive |

|                            |    |    |                |
|----------------------------|----|----|----------------|
| AGAGACGTGTAGCAGTCGTGCGCA   | 0  | 29 | RDR2-sensitive |
| AGAGACGTTGAGCCGGACGAGCAT   | 0  | 11 | RDR2-sensitive |
| AGAGACGTTTTCACTGGCGCTTTT   | 8  | 29 | RDR2-sensitive |
| AGAGACTCAGGATCATCGGGTTCA   | 29 | 4  | RDR2-resistant |
| AGAGACTGAGATGTTATATGTGCA   | 1  | 45 | RDR2-sensitive |
| AGAGACTGAGTCAGACGGGTGGTA   | 2  | 14 | RDR2-sensitive |
| AGAGACTGCAGGATGGTTGCCAC    | 0  | 9  | RDR2-sensitive |
| AGAGACTGCATGGTACAACCCTAA   | 0  | 11 | RDR2-sensitive |
| AGAGACTGCTGAGCAGGAGCTCGT   | 1  | 24 | RDR2-sensitive |
| AGAGACTGCTTAATAACAATCCTGA  | 0  | 14 | RDR2-sensitive |
| AGAGACTGGATTTAACAACGGTGT   | 0  | 20 | RDR2-sensitive |
| AGAGACTGTTGGGAGCAAGGAGGA   | 34 | 1  | RDR2-resistant |
| AGAGACTGTTGTCGATGTATGGTT   | 0  | 26 | RDR2-sensitive |
| AGAGACTTGTGCATCCATTCTGT    | 0  | 19 | RDR2-sensitive |
| AGAGAGAACGCTGACGTGGCACGT   | 0  | 9  | RDR2-sensitive |
| AGAGAGAAGAGGACCGACACGTAG   | 0  | 11 | RDR2-sensitive |
| AGAGAGAAGCGTCGCCTGGAAGGC   | 0  | 10 | RDR2-sensitive |
| AGAGAGAAGGGGACCGACACGTAG   | 2  | 21 | RDR2-sensitive |
| AGAGAGATCACACTGCAAGGGCAT   | 0  | 15 | RDR2-sensitive |
| AGAGAGATCGGCAGAACCGTGCAC   | 0  | 9  | RDR2-sensitive |
| AGAGAGATTGCTGACGTGGCACGT   | 2  | 34 | RDR2-sensitive |
| AGAGAGCACCGCCGCGGTTCTTC    | 0  | 10 | RDR2-sensitive |
| AGAGAGCATCGCCAGACGGTACAC   | 0  | 14 | RDR2-sensitive |
| AGAGAGCATCGTCAGACGGTTCAT   | 0  | 9  | RDR2-sensitive |
| AGAGAGCCGACGCGTAGGGGACGC   | 0  | 11 | RDR2-sensitive |
| AGAGAGCCGGATTGGACTGGCATG   | 0  | 31 | RDR2-sensitive |
| AGAGAGCCGTTGGACTCATGGCGC   | 4  | 44 | RDR2-sensitive |
| AGAGAGCCTGCCGAGCGGAACACC   | 0  | 10 | RDR2-sensitive |
| AGAGAGCGCTGTAGGGGGCACCCGC  | 1  | 17 | RDR2-sensitive |
| AGAGAGCTCTGCCAGACGGTCCTT   | 0  | 27 | RDR2-sensitive |
| AGAGAGCTGAGACGCCGTGGACGA   | 1  | 14 | RDR2-sensitive |
| AGAGAGGACGCCGATCGGAACAAC   | 1  | 40 | RDR2-sensitive |
| AGAGAGGACGCGGCTCTAGTCGGA   | 15 | 0  | RDR2-resistant |
| AGAGAGGATGTAGAAGGCGGTTGC   | 0  | 22 | RDR2-sensitive |
| AGAGAGTCGTGTAGAAACGGGCTA   | 0  | 9  | RDR2-sensitive |
| AGAGATCAGGCACAACGTCGGCGA   | 0  | 12 | RDR2-sensitive |
| AGAGATCATATGTGCATTGCAGAT   | 20 | 0  | RDR2-resistant |
| AGAGATCGCAGACGCTGGAGGCAA   | 0  | 9  | RDR2-sensitive |
| AGAGATCTGGCATGTTGCTGCTGC   | 0  | 10 | RDR2-sensitive |
| AGAGATCTGGCTACTGTCTGCTCAA  | 0  | 9  | RDR2-sensitive |
| AGAGATCTTGAGCGAAGTAGACGA   | 0  | 15 | RDR2-sensitive |
| AGAGATGAGTATGTGGGCTGACGG   | 0  | 14 | RDR2-sensitive |
| AGAGATGGGTA CT CAGAACTGTCT | 0  | 11 | RDR2-sensitive |
| AGAGATGTAGTAGATGTGTTTCT    | 2  | 32 | RDR2-sensitive |
| AGAGATTGCAGATCGTTGGTATTA   | 0  | 11 | RDR2-sensitive |
| AGAGATTGCTGACGTGGCACGTGA   | 0  | 82 | RDR2-sensitive |
| AGAGATTGCTGCAGGTCGCCGGAG   | 1  | 15 | RDR2-sensitive |
| AGAGATTGGTATAAGTTTGGATGG   | 0  | 10 | RDR2-sensitive |
| AGAGATTGGTGACGTGGCACGTGA   | 0  | 12 | RDR2-sensitive |

|                             |    |    |                |
|-----------------------------|----|----|----------------|
| AGAGATTGTAGATGGCAGCTCCAC    | 0  | 41 | RDR2-sensitive |
| AGAGATTGTGAATGGTTTTTCGGT    | 0  | 9  | RDR2-sensitive |
| AGAGATTTTGGCTGTGAGTTTAAA    | 41 | 0  | RDR2-resistant |
| AGAGATTTTGGCTGTGATTTTAAA    | 81 | 0  | RDR2-resistant |
| AGAGCAAAGGGGTAGAGATCACTC    | 0  | 10 | RDR2-sensitive |
| AGAGCAAGCCTTCAAATCGTCGT     | 0  | 14 | RDR2-sensitive |
| AGAGCACAGACCTGGGCACCGGCT    | 1  | 13 | RDR2-sensitive |
| AGAGCACGCGAGCTGTAGCGACGG    | 0  | 9  | RDR2-sensitive |
| AGAGCACGGGCTGGCATAACACGA    | 0  | 35 | RDR2-sensitive |
| AGAGCACTGTGCAAGAGGACGCTA    | 0  | 12 | RDR2-sensitive |
| AGAGCAGAGTGTAGACGTCCACGG    | 0  | 12 | RDR2-sensitive |
| AGAGCAGGACTGCAGGAGGGCGGA    | 0  | 22 | RDR2-sensitive |
| AGAGCAGGACTTTGCCGAGTGCGG    | 2  | 17 | RDR2-sensitive |
| AGAGCAGGCCTCCGAAATCGTCGT    | 2  | 37 | RDR2-sensitive |
| AGAGCAGGGGAGTAGGACAAGCAT    | 0  | 16 | RDR2-sensitive |
| AGAGCATCGAAGAGTCAGAGCCAT    | 0  | 10 | RDR2-sensitive |
| AGAGCATGGACATGGAGTCGACGG    | 0  | 15 | RDR2-sensitive |
| AGAGCCAAGCTCTGGACATGGCAG    | 0  | 10 | RDR2-sensitive |
| AGAGCCAAGTAGAACGGAACGGTT    | 0  | 29 | RDR2-sensitive |
| AGAGCCAAGTAGAACGGAGCCGTT    | 4  | 35 | RDR2-sensitive |
| AGAGCCAGTAGATATTTTCGGCAT    | 0  | 9  | RDR2-sensitive |
| AGAGCCCAGGAACTCGCAGGAGA     | 0  | 13 | RDR2-sensitive |
| AGAGCCCTGTGCCAGGTCGTGGAC    | 0  | 19 | RDR2-sensitive |
| AGAGCCGACAGAAGATCCGGACGC    | 0  | 28 | RDR2-sensitive |
| AGAGCCGGACGGCCTGGGGTCACC    | 69 | 0  | RDR2-resistant |
| AGAGCCGTTGGACTCATGGCGCAC    | 8  | 37 | RDR2-sensitive |
| AGAGCCTGGGCTGTTGGTTTTCGGC   | 1  | 23 | RDR2-sensitive |
| AGAGCCTGTAGATGGTGACGTCGT    | 0  | 11 | RDR2-sensitive |
| AGAGCGACCAGTACGATCGGACGG    | 2  | 19 | RDR2-sensitive |
| AGAGCGACTCAGACTGTTCTTCGG    | 1  | 15 | RDR2-sensitive |
| AGAGCGAGCTGAGCCGCGGCGGAG    | 1  | 15 | RDR2-sensitive |
| AGAGCGATGGCTTGCTTTGAGCAC    | 0  | 30 | RDR2-sensitive |
| AGAGCGCACTGTATTGAGTCGGAA    | 0  | 20 | RDR2-sensitive |
| AGAGCGCGCGTCAAGGATAAGGTGT   | 1  | 12 | RDR2-sensitive |
| AGAGCGCGTGACCAGAGACTGTAA    | 0  | 9  | RDR2-sensitive |
| AGAGCGGCAACTTAGAGGACCCAT    | 0  | 18 | RDR2-sensitive |
| AGAGCGGCTCCGTTCTAGAAATCA    | 3  | 33 | RDR2-sensitive |
| AGAGCGGCTCTGTTCTAGAAATCA    | 1  | 13 | RDR2-sensitive |
| AGAGCGGCTCTGTTCTGTCCGTCA    | 0  | 13 | RDR2-sensitive |
| AGAGCGGGATTGGAACGGAGCGGC    | 1  | 19 | RDR2-sensitive |
| AGAGCGGGATTGGTGTAAACGAAC    | 0  | 16 | RDR2-sensitive |
| AGAGCGGGCTGGACAGCGGCTGGG    | 95 | 11 | RDR2-resistant |
| AGAGCGGGTGGACAGAGTAGGAGA    | 0  | 16 | RDR2-sensitive |
| AGAGCGGTGTCTCTGAACCGACAT    | 0  | 12 | RDR2-sensitive |
| AGAGCGTGACTIONGTGAGAGCGGGAT | 0  | 22 | RDR2-sensitive |
| AGAGCGTGACTIONGTGCGAGCGGGCT | 4  | 19 | RDR2-sensitive |
| AGAGCGTTGTGCTGTGCTACGGCT    | 0  | 10 | RDR2-sensitive |
| AGAGCTATATAGAACTAGAGCAGC    | 0  | 9  | RDR2-sensitive |
| AGAGCTCGGCACCATAGGCTATGG    | 0  | 10 | RDR2-sensitive |



|                          |    |     |                |
|--------------------------|----|-----|----------------|
| AGAGCTCTAGTAGACTCGGCAA   | 0  | 20  | RDR2-sensitive |
| AGAGCTCTAGTAGACTCGGCAC   | 0  | 11  | RDR2-sensitive |
| AGAGCTCTAGTAGGCACTCGGCAA | 1  | 44  | RDR2-sensitive |
| AGAGCTCTCGGCACAGGGACTGGC | 5  | 75  | RDR2-sensitive |
| AGAGCTCTCGTAGACTCGGCAA   | 1  | 24  | RDR2-sensitive |
| AGAGCTCTCGTAGGCACTCGGCAA | 4  | 56  | RDR2-sensitive |
| AGAGCTCTTCAAGTAGATTATTTG | 16 | 0   | RDR2-resistant |
| AGAGCTCTTCTTGATTCTATGGT  | 18 | 0   | RDR2-resistant |
| AGAGCTGACGGTGGAGGAACGAGA | 0  | 9   | RDR2-sensitive |
| AGAGCTGAGAGCCGGTGACGTGAA | 19 | 0   | RDR2-resistant |
| AGAGCTGAGGACAGTCGACGTCAT | 2  | 18  | RDR2-sensitive |
| AGAGCTGAGGATGTGAGGACGGAA | 0  | 10  | RDR2-sensitive |
| AGAGCTGCAGGTCTGGCGAGCTGA | 0  | 13  | RDR2-sensitive |
| AGAGCTGCGGACTGTCCGGCGTGA | 0  | 10  | RDR2-sensitive |
| AGAGCTGGACCTTTGAAAATGGCT | 0  | 14  | RDR2-sensitive |
| AGAGCTGGTAGATTACGACGGTGC | 0  | 16  | RDR2-sensitive |
| AGAGCTGGTCTCGGGCGAGTCGGA | 0  | 10  | RDR2-sensitive |
| AGAGCTGTACGGGCATCAACGCTA | 1  | 27  | RDR2-sensitive |
| AGAGCTTTCGGCAAAGGGACTGGC | 0  | 9   | RDR2-sensitive |
| AGAGGAAACACACGAGACTGGA   | 0  | 10  | RDR2-sensitive |
| AGAGGAAATCTGAAATTTAGCATA | 44 | 8   | RDR2-resistant |
| AGAGGAACCGGCTCCGATCAAGAC | 0  | 26  | RDR2-sensitive |
| AGAGGAACCTCCTCCGTTGGATTG | 0  | 10  | RDR2-sensitive |
| AGAGGAACTCTATGGTCGCAGCGG | 0  | 27  | RDR2-sensitive |
| AGAGGAAGCAGAATGGATGAGGAA | 0  | 20  | RDR2-sensitive |
| AGAGGAAGGAGAAGTCGTAACAAG | 28 | 2   | RDR2-resistant |
| AGAGGAATTCATGCTATTATTATA | 23 | 0   | RDR2-resistant |
| AGAGGACACCAGAAGACGTCTCTG | 0  | 31  | RDR2-sensitive |
| AGAGGACACCGAAGGGCACTCCAT | 0  | 10  | RDR2-sensitive |
| AGAGGACACCGCTAGACGGTACAC | 0  | 9   | RDR2-sensitive |
| AGAGGACACTGTCAGGCGTTACAC | 0  | 16  | RDR2-sensitive |
| AGAGGACAGAATCTTTTAGAGTGT | 17 | 38  | RDR2-sensitive |
| AGAGGACAGACCGGCAAAGACTAG | 0  | 21  | RDR2-sensitive |
| AGAGGACAGAGCCATATAGCACTC | 0  | 9   | RDR2-sensitive |
| AGAGGACAGCAGATCACCGTTGGT | 0  | 12  | RDR2-sensitive |
| AGAGGACAGCAGGACAACAGCAT  | 0  | 16  | RDR2-sensitive |
| AGAGGACAGGACCATATACCGCTC | 1  | 102 | RDR2-sensitive |
| AGAGGACAGGAGCATTCAATGCGC | 0  | 9   | RDR2-sensitive |
| AGAGGACCATTTAGAGGACGCTGC | 5  | 57  | RDR2-sensitive |
| AGAGGACCATTTAGAGGACGTTGC | 0  | 10  | RDR2-sensitive |
| AGAGGACCATTTAGAGGACGTTGT | 2  | 18  | RDR2-sensitive |
| AGAGGACCGAATTTAGGGGACGTT | 1  | 18  | RDR2-sensitive |
| AGAGGACCGACACGTAGAGGGCGC | 0  | 139 | RDR2-sensitive |
| AGAGGACCGACACGTAGGAGGCGC | 3  | 38  | RDR2-sensitive |
| AGAGGACCGACACGTAGGGAGCGC | 1  | 29  | RDR2-sensitive |
| AGAGGACCGACACGTAGGGGACGC | 0  | 69  | RDR2-sensitive |
| AGAGGACCGACACGTAGGGGGCGC | 0  | 44  | RDR2-sensitive |
| AGAGGACCGACGCGTAGAGGGCGC | 0  | 18  | RDR2-sensitive |
| AGAGGACCGACGCGTAGGAGGCGC | 0  | 20  | RDR2-sensitive |

|                           |     |     |                |
|---------------------------|-----|-----|----------------|
| AGAGGACCGACGCGTAGGGGACGC  | 0   | 9   | RDR2-sensitive |
| AGAGGACCGACGCGTAGGGGGCAC  | 0   | 28  | RDR2-sensitive |
| AGAGGACCGAGATAGAGACGTTAC  | 0   | 15  | RDR2-sensitive |
| AGAGGACCGTTCAGAGGACGCTGC  | 0   | 58  | RDR2-sensitive |
| AGAGGACCGTTTAGAAGACGCTGC  | 0   | 13  | RDR2-sensitive |
| AGAGGACCGTTTAGAGGACGACGC  | 0   | 22  | RDR2-sensitive |
| AGAGGACCGTTTAGAGGACGCTGC  | 8   | 158 | RDR2-sensitive |
| AGAGGACCGTTTAGAGGACGCTGT  | 4   | 21  | RDR2-sensitive |
| AGAGGACCGTTTAGAGGACGTTGC  | 17  | 545 | RDR2-sensitive |
| AGAGGACCGTTTAGAGGACGTTGT  | 4   | 87  | RDR2-sensitive |
| AGAGGACCTTGCTGGGCGCCTAGA  | 0   | 51  | RDR2-sensitive |
| AGAGGACCTTGTTGGAGACGTAGA  | 0   | 14  | RDR2-sensitive |
| AGAGGACCTTGTTGGAGGCGTAGA  | 0   | 30  | RDR2-sensitive |
| AGAGGACGAAGACGTACGCTACGT  | 0   | 24  | RDR2-sensitive |
| AGAGGACGACCGCTCGCGCGCTAC  | 0   | 9   | RDR2-sensitive |
| AGAGGACGACGAACGACGGCGAAC  | 0   | 16  | RDR2-sensitive |
| AGAGGACGACGTCGTTATTGTCTC  | 0   | 22  | RDR2-sensitive |
| AGAGGACGAGGACGTCATCTACTC  | 3   | 38  | RDR2-sensitive |
| AGAGGACGAGGACGTCATTTACTC  | 0   | 10  | RDR2-sensitive |
| AGAGGACGCACAATGAACCACCAC  | 0   | 13  | RDR2-sensitive |
| AGAGGACGCACAGTGAACCACCAC  | 0   | 9   | RDR2-sensitive |
| AGAGGACGCACAGTGAACCACTAC  | 0   | 21  | RDR2-sensitive |
| AGAGGACGCATAGTAAACCACCAT  | 0   | 9   | RDR2-sensitive |
| AGAGGACGCGCGGTAAGACTGAGC  | 0   | 39  | RDR2-sensitive |
| AGAGGACGCGGCTCTAGTCGGATG  | 65  | 0   | RDR2-resistant |
| AGAGGACGCTACAGTACTCCCCTT  | 0   | 60  | RDR2-sensitive |
| AGAGGACGCTACTAGAGACGTAGA  | 0   | 10  | RDR2-sensitive |
| AGAGGACGCTACTGAATTCTCTAT  | 0   | 28  | RDR2-sensitive |
| AGAGGACGCTACTGGATTCTCTAT  | 1   | 30  | RDR2-sensitive |
| AGAGGACGCTATAGAGGCCCTTGC  | 0   | 32  | RDR2-sensitive |
| AGAGGACGCTCCTGAAGACGTAGA  | 0   | 9   | RDR2-sensitive |
| AGAGGACGCTGAATATGGCCATGC  | 36  | 3   | RDR2-resistant |
| AGAGGACGCTGCCTGAGACAGCCT  | 0   | 16  | RDR2-sensitive |
| AGAGGACGCTGCTAGAGACCGTAG  | 0   | 10  | RDR2-sensitive |
| AGAGGACGCTGCTGAAACGAGTAG  | 0   | 49  | RDR2-sensitive |
| AGAGGACGCTGCTGAAGAGCATAG  | 0   | 11  | RDR2-sensitive |
| AGAGGACGCTGCTGAAGATCATAG  | 0   | 16  | RDR2-sensitive |
| AGAGGACGCTGCTGAATTCCTTAT  | 0   | 30  | RDR2-sensitive |
| AGAGGACGCTGCTGGAGAGCATAG  | 0   | 43  | RDR2-sensitive |
| AGAGGACGCTGCTGGAGAGCGTAG  | 0   | 29  | RDR2-sensitive |
| AGAGGACGCTGCTGGAGAGTATAG  | 0   | 14  | RDR2-sensitive |
| AGAGGACGCTGCTGGAGGACGTAG  | 0   | 27  | RDR2-sensitive |
| AGAGGACGCTGCTGGAGGGAATAG  | 0   | 13  | RDR2-sensitive |
| AGAGGACGCTGCTGGAGGGCGTAG  | 0   | 62  | RDR2-sensitive |
| AGAGGACGCTGCTGGATACATAGA  | 0   | 11  | RDR2-sensitive |
| AGAGGACGCTGCTGGATTCTCTAC  | 0   | 14  | RDR2-sensitive |
| AGAGGACGCTGCTGGATTCTCTAT  | 164 | 464 | RDR2-sensitive |
| AGAGGACGCTGCTGGATTTCTAT   | 0   | 12  | RDR2-sensitive |
| AGAGGACGCTGTAGGGGGCACCCGC | 0   | 29  | RDR2-sensitive |

|                          |    |    |                |
|--------------------------|----|----|----------------|
| AGAGGACGCTTTAGAGGACCTTGT | 2  | 33 | RDR2-sensitive |
| AGAGGACGCTTTAGAGTTTCTTGT | 0  | 16 | RDR2-sensitive |
| AGAGGACGGAATCTTTTAGAGTGT | 18 | 50 | RDR2-sensitive |
| AGAGGACGGAATGTACTGCTGCTG | 0  | 9  | RDR2-sensitive |
| AGAGGACGGTGCAGATTGGCTGAA | 0  | 21 | RDR2-sensitive |
| AGAGGACGGTGTGAAGACATAAA  | 0  | 31 | RDR2-sensitive |
| AGAGGACGGTGGCATCCCCGGCTT | 0  | 10 | RDR2-sensitive |
| AGAGGACGTACGGCGAACGCTAAA | 0  | 70 | RDR2-sensitive |
| AGAGGACGTACTTGACACCCCAA  | 0  | 37 | RDR2-sensitive |
| AGAGGACGTCAGCAAGGACCCAAC | 3  | 22 | RDR2-sensitive |
| AGAGGACGTCAGCAAGGACCCGAC | 0  | 13 | RDR2-sensitive |
| AGAGGACGTCAGCAAGGACTCAAC | 3  | 73 | RDR2-sensitive |
| AGAGGACGTCAGCAAGGACTCGAC | 1  | 36 | RDR2-sensitive |
| AGAGGACGTCGTAGTGTGTAGCGT | 0  | 12 | RDR2-sensitive |
| AGAGGACGTCGTTGCGGGTTCAAG | 0  | 9  | RDR2-sensitive |
| AGAGGACGTGATTTAGAGGACGTT | 1  | 38 | RDR2-sensitive |
| AGAGGACGTGGAAGTGTAGATGAC | 0  | 14 | RDR2-sensitive |
| AGAGGACGTGTGGTACATTTCTAG | 0  | 14 | RDR2-sensitive |
| AGAGGACGTTGATGGAGACAGCCT | 0  | 9  | RDR2-sensitive |
| AGAGGACGTTGCTAGAGACAGCCT | 0  | 18 | RDR2-sensitive |
| AGAGGACGTTGCTGAAGACAGCCT | 0  | 19 | RDR2-sensitive |
| AGAGGACGTTGCTGAAGAGCGTAG | 0  | 9  | RDR2-sensitive |
| AGAGGACGTTGCTGAAGGAGGTAA | 0  | 9  | RDR2-sensitive |
| AGAGGACGTTGCTGAATTCTCTAT | 2  | 19 | RDR2-sensitive |
| AGAGGACGTTGCTGACAGTTCACC | 0  | 10 | RDR2-sensitive |
| AGAGGACGTTGCTGCAGGGAGTAG | 0  | 9  | RDR2-sensitive |
| AGAGGACGTTGCTGGAGACAACCT | 0  | 14 | RDR2-sensitive |
| AGAGGACGTTGCTGGAGACAGCCT | 1  | 97 | RDR2-sensitive |
| AGAGGACGTTGCTGGAGACAGTCT | 5  | 55 | RDR2-sensitive |
| AGAGGACGTTGCTGGAGAGAGTAG | 1  | 33 | RDR2-sensitive |
| AGAGGACGTTGCTGGAGAGCGTAG | 5  | 93 | RDR2-sensitive |
| AGAGGACGTTGCTGGAGAGTGTAG | 0  | 15 | RDR2-sensitive |
| AGAGGACGTTGCTGGAGATAGCCT | 2  | 20 | RDR2-sensitive |
| AGAGGACGTTGCTGGAGGGAGTAG | 1  | 86 | RDR2-sensitive |
| AGAGGACGTTGCTGGAGGGAGTCG | 0  | 15 | RDR2-sensitive |
| AGAGGACGTTGCTGGAGGGATCGT | 0  | 41 | RDR2-sensitive |
| AGAGGACGTTGCTGGAGGGGTATC | 0  | 14 | RDR2-sensitive |
| AGAGGACGTTGCTGGAGTTGGCGA | 0  | 43 | RDR2-sensitive |
| AGAGGACGTTGCTTTTGCTGGGAC | 0  | 9  | RDR2-sensitive |
| AGAGGACGTTGTAGCGGACCTTGC | 0  | 13 | RDR2-sensitive |
| AGAGGACGTTGTTGGAGACAGCCT | 1  | 13 | RDR2-sensitive |
| AGAGGACGTTTAAATGCAACTGTG | 17 | 0  | RDR2-resistant |
| AGAGGACTATCATATTGTGGCTGC | 0  | 9  | RDR2-sensitive |
| AGAGGACTCTGGCATGCAACACAC | 0  | 9  | RDR2-sensitive |
| AGAGGACTGAATGGAGGCGGCCGC | 1  | 16 | RDR2-sensitive |
| AGAGGACTGATGGGCGCAATTCAG | 0  | 16 | RDR2-sensitive |
| AGAGGACTGTCAGGTCCCCTACGG | 0  | 10 | RDR2-sensitive |
| AGAGGACTGTTTAGAGGACGCTGC | 0  | 10 | RDR2-sensitive |
| AGAGGACTTGATTTAGAGGACGTT | 0  | 12 | RDR2-sensitive |

|                           |     |     |                |
|---------------------------|-----|-----|----------------|
| AGAGGACTTGTGGAGCATGATGGC  | 0   | 9   | RDR2-sensitive |
| AGAGGAGACGCAAGAGCTGTCCGC  | 0   | 31  | RDR2-sensitive |
| AGAGGAGACGCAAGAGCTGTTCGC  | 0   | 13  | RDR2-sensitive |
| AGAGGAGACGGAGCTATGCCAAAC  | 0   | 11  | RDR2-sensitive |
| AGAGGAGACTGTAAAGGACGGATA  | 2   | 625 | RDR2-sensitive |
| AGAGGAGAGAGAATGTGTCCGCCG  | 0   | 12  | RDR2-sensitive |
| AGAGGAGAGAGAATGTGTTGGCCG  | 1   | 20  | RDR2-sensitive |
| AGAGGAGAGGGTACCGGTGAACAC  | 0   | 30  | RDR2-sensitive |
| AGAGGAGAGTGTAGGCGTCCACAA  | 0   | 9   | RDR2-sensitive |
| AGAGGAGAGTGTAGGCGTCCACAG  | 0   | 11  | RDR2-sensitive |
| AGAGGAGGCAGTAGAGTGATGCGA  | 0   | 33  | RDR2-sensitive |
| AGAGGAGTAGTAGAGAGGAGACAG  | 0   | 10  | RDR2-sensitive |
| AGAGGATACCTGTAGTAGTGCCTC  | 0   | 10  | RDR2-sensitive |
| AGAGGATACTGCTGGAGAGCATAG  | 0   | 10  | RDR2-sensitive |
| AGAGGATAGCGGACGTTTCTTTCT  | 0   | 21  | RDR2-sensitive |
| AGAGGATAGTGTAGGCGTCCACAC  | 1   | 13  | RDR2-sensitive |
| AGAGGATATGAGGGCGGAAGAAAA  | 0   | 11  | RDR2-sensitive |
| AGAGGATCAAACGGTGCTCTACGC  | 0   | 9   | RDR2-sensitive |
| AGAGGATCAGACGGTCACAAGATG  | 0   | 12  | RDR2-sensitive |
| AGAGGATCCCTGTAGTAGTGGCGA  | 0   | 9   | RDR2-sensitive |
| AGAGGATCCGGCCAACAGGCTCAT  | 0   | 13  | RDR2-sensitive |
| AGAGGATCGAATGGTATTCTACGT  | 0   | 67  | RDR2-sensitive |
| AGAGGATCGGAACGTCGTCTACTC  | 0   | 43  | RDR2-sensitive |
| AGAGGATCGGAGGAAGAAGGAGGA  | 0   | 15  | RDR2-sensitive |
| AGAGGATCGGTACCTGCAGGCCAT  | 0   | 68  | RDR2-sensitive |
| AGAGGATCGTGCAACAGGAGGCAT  | 41  | 2   | RDR2-resistant |
| AGAGGATCTAACGGCGTCTCCTAA  | 0   | 15  | RDR2-sensitive |
| AGAGGATCTGAAACTGGTCTCGGG  | 0   | 10  | RDR2-sensitive |
| AGAGGATGAAGGCTATCATGACAT  | 176 | 38  | RDR2-resistant |
| AGAGGATGACCAGTCTTGGCTGCA  | 20  | 0   | RDR2-resistant |
| AGAGGATGACGGGTTTCGACGACTC | 1   | 39  | RDR2-sensitive |
| AGAGGATGCTGCTAGAGGGATCGT  | 0   | 44  | RDR2-sensitive |
| AGAGGATGCTGCTGGAGGACGTAG  | 0   | 38  | RDR2-sensitive |
| AGAGGATGCTGTAGAGGGCACCGC  | 0   | 55  | RDR2-sensitive |
| AGAGGATGGAATTTAGGGGACGTT  | 0   | 26  | RDR2-sensitive |
| AGAGGATGGCAGTATGTCTCGTTC  | 0   | 11  | RDR2-sensitive |
| AGAGGATGTACGGCGAACTCTAAA  | 0   | 15  | RDR2-sensitive |
| AGAGGATGTGATTTAGAGGACGTT  | 1   | 15  | RDR2-sensitive |
| AGAGGATGTGGCAGACACTCTAAA  | 0   | 19  | RDR2-sensitive |
| AGAGGATGTTGCTGCTGGAGACAG  | 0   | 10  | RDR2-sensitive |
| AGAGGATGTTGCTGGAGTTGACAA  | 0   | 12  | RDR2-sensitive |
| AGAGGATTGCATGCAGACTGGGGC  | 0   | 13  | RDR2-sensitive |
| AGAGGATTTTACTTGTAGGGGAT   | 0   | 10  | RDR2-sensitive |
| AGAGGATTTTGGCGATTGATAGAT  | 18  | 0   | RDR2-resistant |
| AGAGGCACGGTGAAGTGTGGACGC  | 0   | 31  | RDR2-sensitive |
| AGAGGCAGGTATCAGGGGAAACTA  | 14  | 0   | RDR2-resistant |
| AGAGGCAGTGAGCCAGAGGTCGGA  | 1   | 32  | RDR2-sensitive |
| AGAGGCATGTGGTCCATGGATGGT  | 34  | 2   | RDR2-resistant |
| AGAGGCATTGGACGGTCCGGATCT  | 0   | 9   | RDR2-sensitive |

|                             |    |     |                |
|-----------------------------|----|-----|----------------|
| AGAGGCCAAGTAGAACGGAGTCGT    | 0  | 9   | RDR2-sensitive |
| AGAGGCCAGTCCACGGTCGCCGGA    | 0  | 20  | RDR2-sensitive |
| AGAGGCCGGAAGTTCTGTACCAAG    | 0  | 9   | RDR2-sensitive |
| AGAGGCCGGAAGTTTGTGTACCAA    | 0  | 15  | RDR2-sensitive |
| AGAGGCCGGTAGATTAACAGTCCC    | 1  | 21  | RDR2-sensitive |
| AGAGGCCGAGAGTGGAGGCGAGAGC   | 2  | 48  | RDR2-sensitive |
| AGAGGCCGCGGATATGTTGGTGGGC   | 0  | 13  | RDR2-sensitive |
| AGAGGCCGGCATGCAGGACAGACGG   | 1  | 22  | RDR2-sensitive |
| AGAGGCCGGCGCTGGCCAAGAGCTT   | 0  | 9   | RDR2-sensitive |
| AGAGGCCGTAAGTGTACGTTCCGGTAA | 1  | 15  | RDR2-sensitive |
| AGAGGCTAAACTGTATGCGCGCAT    | 0  | 13  | RDR2-sensitive |
| AGAGGCTACAGTTACAACCGTCGG    | 0  | 14  | RDR2-sensitive |
| AGAGGCTACGGAACGCGCAGAAAA    | 0  | 27  | RDR2-sensitive |
| AGAGGCTAGGGTTTCTGTGCGACGA   | 0  | 12  | RDR2-sensitive |
| AGAGGCTCGACACAAGAACGGCGT    | 0  | 12  | RDR2-sensitive |
| AGAGGCTCGGCTCGGCTCGTTCTGA   | 1  | 93  | RDR2-sensitive |
| AGAGGCTCGGCTCGGTAACGGCTC    | 1  | 23  | RDR2-sensitive |
| AGAGGCTCTGCACGGACGGGAAAA    | 0  | 9   | RDR2-sensitive |
| AGAGGCTGCTATTGAGGATCTCCC    | 3  | 22  | RDR2-sensitive |
| AGAGGCTGGAGCTCGAACCCGGTA    | 0  | 21  | RDR2-sensitive |
| AGAGGCTGTAATTGAGGAGGGGCT    | 0  | 32  | RDR2-sensitive |
| AGAGGGAAGCTGGATGCATGGATG    | 38 | 1   | RDR2-resistant |
| AGAGGGACGGAACGAAGCGACCAC    | 0  | 13  | RDR2-sensitive |
| AGAGGGACGGAACGAGGCGGCCAC    | 0  | 16  | RDR2-sensitive |
| AGAGGGACGGAAGAGGACAACCAT    | 0  | 15  | RDR2-sensitive |
| AGAGGGATCGACCAGGACAGACGG    | 0  | 9   | RDR2-sensitive |
| AGAGGGATGGAACGAGACGGTCAC    | 2  | 24  | RDR2-sensitive |
| AGAGGGATGGAATGAGGCGGCCAC    | 0  | 14  | RDR2-sensitive |
| AGAGGGCAAATCGAAGACTCGCGT    | 0  | 14  | RDR2-sensitive |
| AGAGGGCAACGTAGGGGAATTAGC    | 49 | 0   | RDR2-resistant |
| AGAGGGCAATTACACTATGTTTCAG   | 0  | 10  | RDR2-sensitive |
| AGAGGGCACCGCCACGGTTCTTGT    | 0  | 30  | RDR2-sensitive |
| AGAGGGCAGATATGTAGGCGTGGT    | 54 | 10  | RDR2-resistant |
| AGAGGGCAGGGACTTTTCATTTCGT   | 15 | 0   | RDR2-resistant |
| AGAGGGCCTGGCAGGGAACGTCCG    | 0  | 10  | RDR2-sensitive |
| AGAGGGCGCTGCTGAAGAACGTAA    | 0  | 10  | RDR2-sensitive |
| AGAGGGCGCTGTAGAGGCACCACT    | 1  | 23  | RDR2-sensitive |
| AGAGGGCGCTGTAGAGGGCACCGC    | 0  | 58  | RDR2-sensitive |
| AGAGGGCGCTGTAGGAGGCACCGT    | 0  | 12  | RDR2-sensitive |
| AGAGGGCGCTGTAGGGGACACCGC    | 0  | 10  | RDR2-sensitive |
| AGAGGGCGCTGTAGGGGCACCGCT    | 0  | 11  | RDR2-sensitive |
| AGAGGGCGCTGTAGGGGGCACCGC    | 7  | 156 | RDR2-sensitive |
| AGAGGGCTAGAGCTAGTTTAGGCT    | 0  | 9   | RDR2-sensitive |
| AGAGGGCTCGGCAACAGTACATCG    | 0  | 21  | RDR2-sensitive |
| AGAGGGCTGCGCTGCGGGACGTAG    | 0  | 22  | RDR2-sensitive |
| AGAGGGCTGCGGTGAAGGGTTTAG    | 0  | 11  | RDR2-sensitive |
| AGAGGGCTGTGCGTATGGGAGCGG    | 0  | 10  | RDR2-sensitive |
| AGAGGGGCATCCAGTGATCTGAAT    | 0  | 24  | RDR2-sensitive |
| AGAGGGGTGGAATGAAGCGGTAC     | 0  | 10  | RDR2-sensitive |

|                           |     |     |                |
|---------------------------|-----|-----|----------------|
| AGAGGGTCATGCCACAGTAGATGT  | 0   | 9   | RDR2-sensitive |
| AGAGGGTCGATGCAACTTGACGGA  | 0   | 23  | RDR2-sensitive |
| AGAGGGTCTTGTAGAGGACGTCGT  | 0   | 54  | RDR2-sensitive |
| AGAGGGTGACGAGGATGATGCGGA  | 27  | 0   | RDR2-resistant |
| AGAGGGTGGCATAGAACTGAGCTA  | 49  | 113 | RDR2-sensitive |
| AGAGGGTTGCTGACGCTGACGGGA  | 0   | 9   | RDR2-sensitive |
| AGAGGGTTGGCTATGCCAGCTGT   | 0   | 17  | RDR2-sensitive |
| AGAGGTAATAGGTCGTGCCGGAC   | 0   | 11  | RDR2-sensitive |
| AGAGGTAAGTGTGTGACTGATGGT  | 0   | 22  | RDR2-sensitive |
| AGAGGTACGTGTGTGACTGATGGT  | 0   | 20  | RDR2-sensitive |
| AGAGGTAGACCGCGCTGACGTTGT  | 1   | 25  | RDR2-sensitive |
| AGAGGTAGCTGCAGACGGATGACC  | 0   | 9   | RDR2-sensitive |
| AGAGGTATGGCCTGCTAGTAGTGT  | 0   | 16  | RDR2-sensitive |
| AGAGGTCAGCAACATTGAACGTGT  | 8   | 102 | RDR2-sensitive |
| AGAGGTCAGGACCCAATGATGCAT  | 0   | 16  | RDR2-sensitive |
| AGAGGTCTAGGTCGTCGTCTCCA   | 0   | 9   | RDR2-sensitive |
| AGAGGTCTGGCCTGCTAGTAGTGT  | 0   | 9   | RDR2-sensitive |
| AGAGGTGACGCAGAGGAGGACCGA  | 1   | 12  | RDR2-sensitive |
| AGAGGTGACGTAGAGGAGGACCGA  | 0   | 11  | RDR2-sensitive |
| AGAGGTGTCCGCTGTAGATGGCTG  | 0   | 13  | RDR2-sensitive |
| AGAGGTGTGCTGTAGTAGTGGCA   | 0   | 13  | RDR2-sensitive |
| AGAGGTTCCCTGTAGTAGTGACGG  | 0   | 20  | RDR2-sensitive |
| AGAGGTTGAAGACGCAGGAACCAA  | 0   | 15  | RDR2-sensitive |
| AGAGGTTGCTGGAGACTGCCCATC  | 24  | 1   | RDR2-resistant |
| AGAGTACGTCTGGTCTATGATGAT  | 0   | 9   | RDR2-sensitive |
| AGAGTACTGCGACGAACACGGCAT  | 0   | 15  | RDR2-sensitive |
| AGAGTAGAATGAGTGCGGATAGCC  | 0   | 10  | RDR2-sensitive |
| AGAGTAGACAGTTGATCGGCCCGT  | 0   | 36  | RDR2-sensitive |
| AGAGTAGACCGGAACCACGACAGC  | 0   | 18  | RDR2-sensitive |
| AGAGTAGACGATAGAGCGGCTCGC  | 2   | 48  | RDR2-sensitive |
| AGAGTAGACTGTAAAGGACGGATA  | 0   | 14  | RDR2-sensitive |
| AGAGTAGAGACGAGGACGTAACAG  | 0   | 17  | RDR2-sensitive |
| AGAGTAGAGCTGCTCTGGGGTGGGA | 0   | 16  | RDR2-sensitive |
| AGAGTAGATCTCCGGCCGGGTGGC  | 0   | 10  | RDR2-sensitive |
| AGAGTAGCAGGCTGGACGATGCAT  | 0   | 50  | RDR2-sensitive |
| AGAGTAGGATACAGGATGAGCTAC  | 0   | 13  | RDR2-sensitive |
| AGAGTAGTGGAAGGCGGGCTGGGC  | 162 | 22  | RDR2-resistant |
| AGAGTATACGGCTGCAGCAGTTCA  | 0   | 13  | RDR2-sensitive |
| AGAGTATATATCTTTTTGAGTCGG  | 0   | 9   | RDR2-sensitive |
| AGAGTATGCTGTAGAGGATAGGAG  | 0   | 11  | RDR2-sensitive |
| AGAGTCACGACTGTGGAGGATGGT  | 0   | 12  | RDR2-sensitive |
| AGAGTCACGGGCGAGAAGAGGACG  | 0   | 13  | RDR2-sensitive |
| AGAGTCAGTTATCGTCGTTTTGCC  | 19  | 0   | RDR2-resistant |
| AGAGTCCTTGGTGGCCGTCGGACA  | 2   | 38  | RDR2-sensitive |
| AGAGTCTGTTGGAACGCACGGTGC  | 0   | 16  | RDR2-sensitive |
| AGAGTCTTAGTTTCGTCGAGACTGG | 0   | 10  | RDR2-sensitive |
| AGAGTGAACGGAACAGAGCGTGAC  | 0   | 19  | RDR2-sensitive |
| AGAGTGAACGGAACGGAGCGTGAC  | 12  | 108 | RDR2-sensitive |
| AGAGTGAACGGAACAGAGCGGCT   | 0   | 34  | RDR2-sensitive |

|                           |     |     |                |
|---------------------------|-----|-----|----------------|
| AGAGTGACTGTTACAGTTCGGTTA  | 0   | 23  | RDR2-sensitive |
| AGAGTGCGGCATCGGACGGCTGA   | 1   | 23  | RDR2-sensitive |
| AGAGTGCTGTGTGAACGAGCCGGT  | 0   | 63  | RDR2-sensitive |
| AGAGTGGACACCAGGGGCGAGTTC  | 1   | 14  | RDR2-sensitive |
| AGAGTGGACAGTTGACATCGGCAT  | 0   | 11  | RDR2-sensitive |
| AGAGTGGACAGTTGACGCCGGCCC  | 1   | 22  | RDR2-sensitive |
| AGAGTGGACAGTTGACGCCGGCTC  | 2   | 15  | RDR2-sensitive |
| AGAGTGGAGGCGAGAGCTGACGTG  | 0   | 26  | RDR2-sensitive |
| AGAGTGGAGGGTAGACACATAGGT  | 0   | 9   | RDR2-sensitive |
| AGAGTGGAGTTAGAACGGCCTTGG  | 0   | 10  | RDR2-sensitive |
| AGAGTGGGAGGCAGAACCGTGAC   | 0   | 12  | RDR2-sensitive |
| AGAGTGTGCTGTAAAGGACGGAGA  | 0   | 12  | RDR2-sensitive |
| AGAGTTAAGGCCACGTCGGTATCA  | 0   | 11  | RDR2-sensitive |
| AGAGTTACTGTTTGATCCTTGCGG  | 1   | 15  | RDR2-sensitive |
| AGAGTTCAAAGGCCTGATGTCTGA  | 40  | 3   | RDR2-resistant |
| AGAGTTCCTTGTTGGACGGCGTAG  | 0   | 14  | RDR2-sensitive |
| AGAGTTCCTGGATGTGTACTGCAA  | 0   | 22  | RDR2-sensitive |
| AGAGTTGATCACCTCATCGTCCGG  | 0   | 10  | RDR2-sensitive |
| AGAGTTGCTGCGTTGACCGTCCGG  | 21  | 0   | RDR2-resistant |
| AGAGTTGGAGTCAGGAGATGTCGC  | 0   | 17  | RDR2-sensitive |
| AGAGTTGGGAGCTGTAGACGGTGC  | 0   | 10  | RDR2-sensitive |
| AGAGTTGGGGCGAGGAAGACGACG  | 1   | 15  | RDR2-sensitive |
| AGAGTTGTCTAAGTCCGTTGGAT   | 0   | 24  | RDR2-sensitive |
| AGAGTTGTGGGCCGTTGGATGCAA  | 0   | 18  | RDR2-sensitive |
| AGAGTTGTGGGCGGAGATGGGAAT  | 0   | 10  | RDR2-sensitive |
| AGAGTTTATCTGTCGTCTGCGTCT  | 1   | 13  | RDR2-sensitive |
| AGAGTTTCGTTGATTGTTGTCGAC  | 137 | 2   | RDR2-resistant |
| AGATAAAGGAGGACGAGCGACCGA  | 0   | 9   | RDR2-sensitive |
| AGATAACTCCACTCTGGGCGGCTT  | 33  | 1   | RDR2-resistant |
| AGATAACTGTAATATGGACGGTTG  | 0   | 10  | RDR2-sensitive |
| AGATAAGGCACTGACATTTGAAGT  | 20  | 0   | RDR2-resistant |
| AGATAATTCGGGTTATACTTAGCT  | 52  | 3   | RDR2-resistant |
| AGATACAGCTGCACGGTACTCCAA  | 0   | 42  | RDR2-sensitive |
| AGATACAGGGCATATTCTCTCGCA  | 0   | 12  | RDR2-sensitive |
| AGATACGAACGTGGACGAGCGGCT  | 2   | 14  | RDR2-sensitive |
| AGATACGGCTGCACGGTACTCCAA  | 1   | 254 | RDR2-sensitive |
| AGATACGGCTGCACGGTACTCCAT  | 0   | 10  | RDR2-sensitive |
| AGATACGGCTGCACGGTACTCCCA  | 0   | 10  | RDR2-sensitive |
| AGATACGTATGGTCTGTTGGTGCC  | 0   | 9   | RDR2-sensitive |
| AGATACTCGGCAGAACCGTGCACC  | 0   | 17  | RDR2-sensitive |
| AGATACTGACATCGAGGACGCCAT  | 1   | 15  | RDR2-sensitive |
| AGATACTGCTGCACGGTACTCCAA  | 0   | 9   | RDR2-sensitive |
| AGATACTGTATCTCAGCTGGAGGT  | 34  | 1   | RDR2-resistant |
| AGATACTGTGGCGTAGACTTCGGC  | 1   | 25  | RDR2-sensitive |
| AGATAGAACGGTTTACAGACTCTT  | 0   | 23  | RDR2-sensitive |
| AGATAGAACTTCAGCGATCTGGTT  | 36  | 3   | RDR2-resistant |
| AGATAGAAGTCATCTGAGGCGTCCG | 2   | 18  | RDR2-sensitive |
| AGATAGAGACTGTCTGCTCGTCAG  | 0   | 12  | RDR2-sensitive |
| AGATAGATGGGAGGCAGAACGGCA  | 0   | 9   | RDR2-sensitive |

|                           |     |    |                |
|---------------------------|-----|----|----------------|
| AGATAGCATCGCCAGACGGTTCAT  | 0   | 12 | RDR2-sensitive |
| AGATAGGACTGTCACGTTAGTCGA  | 0   | 10 | RDR2-sensitive |
| AGATAGGTATCGTCATCGTCGACC  | 17  | 1  | RDR2-resistant |
| AGATAGTCTGTTGTAGTGAGATGC  | 0   | 32 | RDR2-sensitive |
| AGATAGTTTGAAAATGGTCGCTGT  | 45  | 10 | RDR2-resistant |
| AGATAGTTTTCTGATTGCCAAGGA  | 16  | 0  | RDR2-resistant |
| AGATATACATCAGGATTTTCGTCGT | 38  | 1  | RDR2-resistant |
| AGATATACCTGACTGGGGCTTCCC  | 0   | 16 | RDR2-sensitive |
| AGATATAGAGGACGTTGCTGGAGA  | 0   | 14 | RDR2-sensitive |
| AGATATCATCATGTCTCGTAGGCG  | 0   | 22 | RDR2-sensitive |
| AGATATCGGCTAGCTGGTTCTCGG  | 13  | 32 | RDR2-sensitive |
| AGATATCGGCTATGTGATTTTCGG  | 32  | 3  | RDR2-resistant |
| AGATATCGGGCAGGAGTAGTGGGC  | 2   | 62 | RDR2-sensitive |
| AGATATCGTAGCAACGCACGGCAC  | 0   | 30 | RDR2-sensitive |
| AGATATCGTCGGGGACTAGCGGTG  | 0   | 9  | RDR2-sensitive |
| AGATATCTTTTCTGTGCCGAATAC  | 20  | 0  | RDR2-resistant |
| AGATATGGACCCGGCTGAAAGACG  | 0   | 23 | RDR2-sensitive |
| AGATATGTGCGGCAGTTTCTGTTT  | 0   | 13 | RDR2-sensitive |
| AGATATGTTGGCTATTGCAAAGGT  | 21  | 0  | RDR2-resistant |
| AGATATTGTTGGTCACTTCGTCAT  | 132 | 2  | RDR2-resistant |
| AGATATTTTCGTCGGCCGGCCCAC  | 3   | 21 | RDR2-sensitive |
| AGATATTTTCGTCGGTTCGGCCCAC | 0   | 10 | RDR2-sensitive |
| AGATCACCGTTGGTTTGAAGATCG  | 0   | 34 | RDR2-sensitive |
| AGATCACGGCGAGCTGGAGACTGC  | 0   | 18 | RDR2-sensitive |
| AGATCACTCCTACGACCGGCGGCT  | 0   | 12 | RDR2-sensitive |
| AGATCAGGTCGTAGGGATGGTCAG  | 0   | 18 | RDR2-sensitive |
| AGATCATTCTATCTTTAAGTCGGT  | 0   | 16 | RDR2-sensitive |
| AGATCATTTTCATCTTTAAGTCGGT | 0   | 15 | RDR2-sensitive |
| AGATCCAGCACGGATTAGGATCGT  | 1   | 50 | RDR2-sensitive |
| AGATCCGGACTGGGTGTTGGCCAT  | 13  | 31 | RDR2-sensitive |
| AGATCGATATCAGGACTCGACGGC  | 0   | 17 | RDR2-sensitive |
| AGATCGCTGAACGCTGACGGTGAC  | 5   | 30 | RDR2-sensitive |
| AGATCGGAATGACCAATAGAGGCT  | 0   | 12 | RDR2-sensitive |
| AGATCGGCCTGATATGAACCGGTA  | 0   | 9  | RDR2-sensitive |
| AGATCGGGCATCGTGACGCATCAC  | 0   | 10 | RDR2-sensitive |
| AGATCGGGCATCGTGACGCATCAG  | 0   | 18 | RDR2-sensitive |
| AGATCGGGCATCGTGACGCATCAT  | 8   | 72 | RDR2-sensitive |
| AGATCGGTGTTAGGATATGTCGGT  | 2   | 20 | RDR2-sensitive |
| AGATCTACTGGACGACGAGCGCAC  | 0   | 51 | RDR2-sensitive |
| AGATCTAGATCGGATGCACCAGAT  | 0   | 13 | RDR2-sensitive |
| AGATCTAGATCGGATGCACCGGAT  | 0   | 11 | RDR2-sensitive |
| AGATCTATGTGTCAGTCGCGGACC  | 0   | 10 | RDR2-sensitive |
| AGATCTCAAAGCGTCGAATGTCCC  | 17  | 0  | RDR2-resistant |
| AGATCTCGGGAACCATGAAGACGT  | 3   | 44 | RDR2-sensitive |
| AGATCTGCAAGTCGTGGCGTCAC   | 1   | 15 | RDR2-sensitive |
| AGATCTGTAGATGCAGGCTTGACAG | 0   | 25 | RDR2-sensitive |
| AGATCTGTAGTGCCGAGCTAGGCG  | 0   | 10 | RDR2-sensitive |
| AGATCTGTATGTACTGTTTCGTCGA | 4   | 24 | RDR2-sensitive |
| AGATCTGTCGCATGCGTTGACTGC  | 0   | 9  | RDR2-sensitive |



|                           |     |    |                |
|---------------------------|-----|----|----------------|
| AGATCTGTGGCGCCGAGCTAGGTG  | 0   | 10 | RDR2-sensitive |
| AGATCTGTGTCTGAATAGGTGTGC  | 34  | 1  | RDR2-resistant |
| AGATCTTGTATTTCTGTCTCGCCT  | 16  | 0  | RDR2-resistant |
| AGATGAACGGACCTGGATGTGCAG  | 0   | 32 | RDR2-sensitive |
| AGATGAACTCGCGAATGACGGCGC  | 0   | 10 | RDR2-sensitive |
| AGATGAAGGACAAGCAGACTGCAA  | 0   | 24 | RDR2-sensitive |
| AGATGAAGTCGGTATCAGATGCTT  | 28  | 3  | RDR2-resistant |
| AGATGAATCCGTGACGGTAACCAA  | 0   | 15 | RDR2-sensitive |
| AGATGACAGAGCAGCGGACAAGAT  | 0   | 9  | RDR2-sensitive |
| AGATGACAGCAGCCTGTAGTGTAG  | 0   | 14 | RDR2-sensitive |
| AGATGACAGTAGCCTGTAGTGTAG  | 0   | 10 | RDR2-sensitive |
| AGATGACCCGGCGACCTTGAGACA  | 0   | 18 | RDR2-sensitive |
| AGATGACCCTGGCTCACTTTGTCC  | 17  | 0  | RDR2-resistant |
| AGATGACCGACATGTAGGGGGCGC  | 0   | 11 | RDR2-sensitive |
| AGATGACCGTTGCTCCGCTGGCAC  | 0   | 10 | RDR2-sensitive |
| AGATGACGGGTTAGACTTTATCGA  | 0   | 9  | RDR2-sensitive |
| AGATGACGGGTTAGACTTTGTCTGA | 0   | 12 | RDR2-sensitive |
| AGATGACGGGTTGACGACTGGAC   | 4   | 17 | RDR2-sensitive |
| AGATGACGTCAGCACTGGAGTCAC  | 0   | 9  | RDR2-sensitive |
| AGATGACGTTGCTGGAGGGAGTAG  | 0   | 13 | RDR2-sensitive |
| AGATGACTGGACACTAATAAACAA  | 0   | 15 | RDR2-sensitive |
| AGATGACTTGATGAAATTAGGCTT  | 27  | 0  | RDR2-resistant |
| AGATGAGGATGTGCCGGATTCCGGC | 15  | 0  | RDR2-resistant |
| AGATGAGGATGTGCTAGATTCGGC  | 125 | 14 | RDR2-resistant |
| AGATGAGTATGTGGGCTGACGGTC  | 0   | 12 | RDR2-sensitive |
| AGATGATCCGCGACCTGACGGCAA  | 0   | 12 | RDR2-sensitive |
| AGATGATGCGTACTGATCAGACAT  | 1   | 34 | RDR2-sensitive |
| AGATGATGCGTACTGATTAGACAT  | 2   | 37 | RDR2-sensitive |
| AGATGATGCGTACTGATTAGACTT  | 2   | 38 | RDR2-sensitive |
| AGATGATGGACGTAGTGACCGCAT  | 0   | 27 | RDR2-sensitive |
| AGATGATGGACTACCTCGTTGCTC  | 0   | 10 | RDR2-sensitive |
| AGATGATGGACTAGCTCATTCTC   | 0   | 30 | RDR2-sensitive |
| AGATGCAACGGCGATCTGATAACT  | 21  | 0  | RDR2-resistant |
| AGATGCACACGGACGGTCTAGATC  | 0   | 10 | RDR2-sensitive |
| AGATGCACCTCTGCGGTCGGGACG  | 3   | 24 | RDR2-sensitive |
| AGATGCAGAGCTGCTTGTCTGGAAC | 0   | 12 | RDR2-sensitive |
| AGATGCAGGCTTGCAGCTCTTCAG  | 1   | 12 | RDR2-sensitive |
| AGATGCGACAGGGTAGAAGGGGTA  | 0   | 12 | RDR2-sensitive |
| AGATGCGACTGAACCAGCACAGAC  | 0   | 15 | RDR2-sensitive |
| AGATGCGGAGAACATGGCAGATAG  | 0   | 12 | RDR2-sensitive |
| AGATGCGGCGAGGCCTGAGGTTGG  | 74  | 3  | RDR2-resistant |
| AGATGCGGGGAAGCACGACGACGT  | 0   | 10 | RDR2-sensitive |
| AGATGCTGTAGGGAGGTGGGCCGG  | 0   | 10 | RDR2-sensitive |
| AGATGGAAGTGGAGGAGACGACGT  | 1   | 13 | RDR2-sensitive |
| AGATGGAAGCGTACAGCACTCTAC  | 0   | 26 | RDR2-sensitive |
| AGATGGAAGGCAGAACGGCAGAAC  | 0   | 13 | RDR2-sensitive |
| AGATGGAATGTTACAGTCGTCGAG  | 0   | 13 | RDR2-sensitive |
| AGATGGACGAACCTGGATGCACGG  | 0   | 16 | RDR2-sensitive |
| AGATGGACGGCCAAGTCACTCCAG  | 0   | 10 | RDR2-sensitive |

|                           |    |     |                |
|---------------------------|----|-----|----------------|
| AGATGGACGGTACAGATTGGCTAA  | 0  | 17  | RDR2-sensitive |
| AGATGGACGGTGCAGATTGGCTGA  | 2  | 65  | RDR2-sensitive |
| AGATGGACGGTGTAGATTCATGGA  | 0  | 9   | RDR2-sensitive |
| AGATGGACGGTGTAGATTGGCTGA  | 1  | 56  | RDR2-sensitive |
| AGATGGACGGTGTAGATTTGTGGA  | 0  | 19  | RDR2-sensitive |
| AGATGGACTTTGTGTGGGGGCTAC  | 0  | 10  | RDR2-sensitive |
| AGATGGAGGACAGTAGCGCGGTGG  | 68 | 14  | RDR2-resistant |
| AGATGGAGGACTAAGGGGATGCGG  | 0  | 10  | RDR2-sensitive |
| AGATGGATAGTTATCATACCTGCT  | 38 | 7   | RDR2-resistant |
| AGATGGATCAGTTGTTGAGGACAT  | 24 | 3   | RDR2-resistant |
| AGATGGATCATGGCACATGTACTT  | 48 | 2   | RDR2-resistant |
| AGATGGATCGGC GCGAGACGGAGC | 0  | 9   | RDR2-sensitive |
| AGATGGATCTGTGACGGTAACTAA  | 0  | 23  | RDR2-sensitive |
| AGATGGATGGACCTGGATGTGCGG  | 0  | 16  | RDR2-sensitive |
| AGATGGCACAGTAGACGTCTCCAC  | 0  | 20  | RDR2-sensitive |
| AGATGGCAGAACGGCAGAACACAC  | 0  | 51  | RDR2-sensitive |
| AGATGGCAGAACGGCAGAACAGAG  | 0  | 22  | RDR2-sensitive |
| AGATGGCAGAACGGCAGAACAGAT  | 0  | 62  | RDR2-sensitive |
| AGATGGCAGTGTAGGCGTCCACAT  | 0  | 10  | RDR2-sensitive |
| AGATGGCATAGTAGACGTCTCCAC  | 1  | 18  | RDR2-sensitive |
| AGATGGCCTGGAGAGAGACAGTTG  | 0  | 9   | RDR2-sensitive |
| AGATGGCGAGAATGACAGATGACA  | 63 | 6   | RDR2-resistant |
| AGATGGGAGGCAGAACGGCAGAAC  | 0  | 23  | RDR2-sensitive |
| AGATGGGCAGTCTCCGGCAACCTC  | 0  | 10  | RDR2-sensitive |
| AGATGGGCGTGAGAGAGGTGGAAA  | 0  | 13  | RDR2-sensitive |
| AGATGGGTCCGGCAGAGACGGAGC  | 0  | 11  | RDR2-sensitive |
| AGATGGGTCCGGCAGAGACGGAAC  | 11 | 90  | RDR2-sensitive |
| AGATGGGTCCGGCAGAGACGGAGC  | 13 | 131 | RDR2-sensitive |
| AGATGGGTTGGCGCAAGATGGAAC  | 0  | 18  | RDR2-sensitive |
| AGATGGGTTGGCGCAGAGACGGAAC | 0  | 10  | RDR2-sensitive |
| AGATGGGTTGGCGCAGATGGAAC   | 5  | 40  | RDR2-sensitive |
| AGATGGTAGTGTAGGCGTCCACAT  | 0  | 14  | RDR2-sensitive |
| AGATGGTGAGTCGGCATATGTCTA  | 0  | 9   | RDR2-sensitive |
| AGATGGTTTTGTTGACGTGTCATT  | 22 | 0   | RDR2-resistant |
| AGATGTAGAGCACAAGGACGGTGA  | 0  | 18  | RDR2-sensitive |
| AGATGTAGATGGTTTGCAAGAATT  | 26 | 2   | RDR2-resistant |
| AGATGTCATCTCTCTGATGTTTGG  | 0  | 13  | RDR2-sensitive |
| AGATGTCGGAGATATTTATGTGCT  | 2  | 29  | RDR2-sensitive |
| AGATGTCGTTGGGGACTAGCGGTG  | 1  | 12  | RDR2-sensitive |
| AGATGTCTGGGACCTAGTGTGGCT  | 0  | 10  | RDR2-sensitive |
| AGATGTGAGACCTCTCAGGGGCAA  | 0  | 12  | RDR2-sensitive |
| AGATGTGGAACAGACGACGCACAT  | 0  | 40  | RDR2-sensitive |
| AGATGTGGAGACTTGGAGACGTGC  | 0  | 29  | RDR2-sensitive |
| AGATGTGGCCTGACGACGGAGGTT  | 21 | 0   | RDR2-resistant |
| AGATGTTAGAAGATGTTGTGCTGC  | 28 | 0   | RDR2-resistant |
| AGATGTTAGTTGGACGAGTCCGT   | 0  | 14  | RDR2-sensitive |
| AGATGTTATCGCTCGATCATTATC  | 24 | 0   | RDR2-resistant |
| AGATGTTCCGACGGCTGCTATACG  | 30 | 5   | RDR2-resistant |
| AGATGTTTGGACCCGTCGGGCGGC  | 0  | 9   | RDR2-sensitive |

|                           |     |    |                |
|---------------------------|-----|----|----------------|
| AGATGTTTGGTTTCTGGAACGGAT  | 0   | 12 | RDR2-sensitive |
| AGATTAACAACGGTAAACTTTACT  | 62  | 1  | RDR2-resistant |
| AGATTACAGGACGGCAGAACACAA  | 1   | 22 | RDR2-sensitive |
| AGATTACCTCACTCGGATCGTCAT  | 0   | 24 | RDR2-sensitive |
| AGATTAGGGGGACTGTAGTGAGGC  | 0   | 93 | RDR2-sensitive |
| AGATTAGTAGGAGCCGCGTCCCT   | 0   | 9  | RDR2-sensitive |
| AGATTATAGGGATGTTTGGACTGA  | 0   | 11 | RDR2-sensitive |
| AGATTATATCTTTGGTCTGGTTGA  | 17  | 1  | RDR2-resistant |
| AGATTATTTTCGTGTCTGTCTGGCC | 0   | 9  | RDR2-sensitive |
| AGATTCACCGAAGCGGACTGACGG  | 0   | 16 | RDR2-sensitive |
| AGATTCACCGAAGGCAGAACACAA  | 0   | 11 | RDR2-sensitive |
| AGATTCACCGACGGCAGAACCAAA  | 0   | 9  | RDR2-sensitive |
| AGATTCAGACTGTCCGGTATGACA  | 0   | 11 | RDR2-sensitive |
| AGATTCATCGACGGCAGAACCCGG  | 0   | 10 | RDR2-sensitive |
| AGATTCATCGGTTGCGACGACGGT  | 0   | 13 | RDR2-sensitive |
| AGATTGAGGGACTGACGGGTTAT   | 0   | 9  | RDR2-sensitive |
| AGATTGCCATAGCAGCTCGTCGC   | 0   | 11 | RDR2-sensitive |
| AGATTGGGACGGATACAGGACGA   | 0   | 9  | RDR2-sensitive |
| AGATTGGGACGGATACAGGACGG   | 0   | 29 | RDR2-sensitive |
| AGATTCTATTGTTTGGTCTGT     | 0   | 15 | RDR2-sensitive |
| AGATTCTCCAAGCGGACTGACGG   | 0   | 15 | RDR2-sensitive |
| AGATTCTGTCTGATATGTTCTC    | 148 | 6  | RDR2-resistant |
| AGATTCTGACCTTTGGCGCGCTT   | 42  | 1  | RDR2-resistant |
| AGATTCTGATTGGTTGCTTGATA   | 0   | 13 | RDR2-sensitive |
| AGATTGAAGTGGATTGAGTGGTAT  | 0   | 11 | RDR2-sensitive |
| AGATTGACCTAGTGCAGCTGGAC   | 0   | 9  | RDR2-sensitive |
| AGATTGAGTAGGATTGAATCGGTT  | 0   | 19 | RDR2-sensitive |
| AGATTGCAGAACGGTAGGCTACCT  | 0   | 17 | RDR2-sensitive |
| AGATTGCGGGCGAGGGACGCGGCG  | 23  | 3  | RDR2-resistant |
| AGATTGCTGCTGCATCTCGGACAA  | 0   | 14 | RDR2-sensitive |
| AGATTGGAGGACCAGGCACATCAC  | 0   | 11 | RDR2-sensitive |
| AGATTGGATTGAGCAGGAGACTTT  | 0   | 10 | RDR2-sensitive |
| AGATTGGCTGAAGGCAGAACCAGG  | 0   | 32 | RDR2-sensitive |
| AGATTGGCTGAAGGCAGAACGCAA  | 0   | 53 | RDR2-sensitive |
| AGATTGGTAGGAGCTACGTTCCCT  | 0   | 14 | RDR2-sensitive |
| AGATTGTAGAGCTGTGCAGAGCGG  | 0   | 10 | RDR2-sensitive |
| AGATTGTAGATGCATGTGCACGCT  | 0   | 13 | RDR2-sensitive |
| AGATTGTAGATGGCAGCTCCGCTC  | 0   | 21 | RDR2-sensitive |
| AGATTGTAGCGTTAGTACGGACTA  | 0   | 20 | RDR2-sensitive |
| AGATTGTAGGGAGGGGATTTGGTG  | 0   | 19 | RDR2-sensitive |
| AGATTGTGTGTCTCGATCGGTCGT  | 0   | 52 | RDR2-sensitive |
| AGATTGTTAATGTAGGTATGTATA  | 15  | 0  | RDR2-resistant |
| AGATTGTTCCAGGAGATGAGATGA  | 20  | 1  | RDR2-resistant |
| AGATTGTTGAACAGATCGACGTCA  | 0   | 18 | RDR2-sensitive |
| AGATTTACATGTAGTCTGACGTGA  | 0   | 13 | RDR2-sensitive |
| AGATTTACTGGAGGCAGAACGCAG  | 0   | 21 | RDR2-sensitive |
| AGATTTAGATATTGTTGGTCACTT  | 43  | 0  | RDR2-resistant |
| AGATTTAGGGCTTTACTGTTGGAG  | 0   | 17 | RDR2-sensitive |
| AGATTTAGGGTCTGTTGGACAGA   | 0   | 10 | RDR2-sensitive |

|                           |     |    |                |
|---------------------------|-----|----|----------------|
| AGATTTAGTGGAAGTGGACGGTTG  | 0   | 11 | RDR2-sensitive |
| AGATTTCTTGCTGACACGTGGAAC  | 0   | 10 | RDR2-sensitive |
| AGATTTGATGTAGAGGGCAGATAT  | 28  | 1  | RDR2-resistant |
| AGATTTGCACTGTGAGAAAGTCGG  | 0   | 9  | RDR2-sensitive |
| AGATTTGGCATACTCTTTAAGCTC  | 17  | 0  | RDR2-resistant |
| AGATTTGGGGCTTACTGTTGGAG   | 2   | 17 | RDR2-sensitive |
| AGATTTGTAGAGTGACATCAAGG   | 0   | 9  | RDR2-sensitive |
| AGATTTGTATCGTTTGACTCGGTA  | 0   | 10 | RDR2-sensitive |
| AGATTTTATAGCGATCGGTTAGGA  | 3   | 22 | RDR2-sensitive |
| AGATTTTATATTTTTTCGTCGGGT  | 149 | 9  | RDR2-resistant |
| AGATTTTGACTTGTTGGGATTGA   | 2   | 20 | RDR2-sensitive |
| AGATTTTGAGTCTATTCGTCGGC   | 0   | 20 | RDR2-sensitive |
| AGATTTTGGCTGTGATTTTAAAAG  | 25  | 0  | RDR2-resistant |
| AGCAAACCGGCACTGCATCTGCAT  | 0   | 10 | RDR2-sensitive |
| AGCAAACCGGCTCTGGCTCCTTGA  | 0   | 16 | RDR2-sensitive |
| AGCAAACCGGCTCTGGCTCTTGA   | 0   | 16 | RDR2-sensitive |
| AGCAAACGACGCGACGACGAGCTG  | 4   | 24 | RDR2-sensitive |
| AGCAAACGGGCCGGAACGGTAAGC  | 0   | 9  | RDR2-sensitive |
| AGCAAACGTGTGAGCACTCGGCAA  | 0   | 9  | RDR2-sensitive |
| AGCAAACCTAGAACGAGATTGTGTA | 29  | 0  | RDR2-resistant |
| AGCAAAGCGTCGAGCACTCGGCAA  | 0   | 12 | RDR2-sensitive |
| AGCAACAAACAGGACGTAGGGTAT  | 0   | 17 | RDR2-sensitive |
| AGCAACAGAAAGACGGATGGACTC  | 1   | 18 | RDR2-sensitive |
| AGCAACAGAGCTCATGATCGTCGA  | 0   | 21 | RDR2-sensitive |
| AGCAACAGTTTCAACGGTCGTCTC  | 0   | 10 | RDR2-sensitive |
| AGCAACCGAGGACGTAGACGCGGC  | 2   | 36 | RDR2-sensitive |
| AGCAACCGCTGTAGAGCGAGTCGG  | 0   | 14 | RDR2-sensitive |
| AGCAACGACTGTAGAGCGAGTCGG  | 0   | 61 | RDR2-sensitive |
| AGCAACGCACGGACATACACCTAG  | 0   | 27 | RDR2-sensitive |
| AGCAACGCACGGACATACCTAG    | 0   | 10 | RDR2-sensitive |
| AGCAACGCAGGAGAGGCTGAACAA  | 0   | 11 | RDR2-sensitive |
| AGCAACGGACGGTCGGTCGCTAAA  | 5   | 42 | RDR2-sensitive |
| AGCAACGTTCGAGGTAGAGCGTGCT | 24  | 85 | RDR2-sensitive |
| AGCAACGTTTGTGTTGGTTGTTCCG | 0   | 32 | RDR2-sensitive |
| AGCAACTCCGAACAGAGAGCTGT   | 0   | 12 | RDR2-sensitive |
| AGCAAGACCGGCCATTTGGACAT   | 0   | 22 | RDR2-sensitive |
| AGCAAGACGGGACTGCCGAGCAGC  | 0   | 12 | RDR2-sensitive |
| AGCAAGACTCTCGAGCAAGTCAGA  | 0   | 9  | RDR2-sensitive |
| AGCAAGAGGACGTCAGCAAGGACT  | 2   | 18 | RDR2-sensitive |
| AGCAAGGACCAGCAGACTGCAGGA  | 0   | 14 | RDR2-sensitive |
| AGCAAGGACTGCGGCAGGCAGCAC  | 2   | 16 | RDR2-sensitive |
| AGCAAGGCAGCGTAGACCCTCGGT  | 0   | 19 | RDR2-sensitive |
| AGCAAGTACTTTTTGTTGGACT    | 0   | 13 | RDR2-sensitive |
| AGCAAGTCAGAACGCACCGGACAT  | 0   | 10 | RDR2-sensitive |
| AGCAAGTTAAATGGCTACTCTGTT  | 0   | 14 | RDR2-sensitive |
| AGCAAGTTGTTGATTGTGATGATG  | 72  | 7  | RDR2-resistant |
| AGCAATCCGGCTCGGAATCGTTCC  | 0   | 10 | RDR2-sensitive |
| AGCAATCCGGTTAGGAATCGTTCC  | 0   | 9  | RDR2-sensitive |
| AGCAATGTAGGACATTGTTACGGT  | 136 | 19 | RDR2-resistant |

|                           |     |      |                |
|---------------------------|-----|------|----------------|
| AGCACACAACATAAGGTGCGGGAC  | 0   | 13   | RDR2-sensitive |
| AGCACACCACATATGATCGCCGAC  | 0   | 10   | RDR2-sensitive |
| AGCACACGGCAAAGCGTCTGACAC  | 0   | 16   | RDR2-sensitive |
| AGCACACGGCGCGACGAACGACAT  | 0   | 10   | RDR2-sensitive |
| AGCACACGGTAGAGAAATCGGCAA  | 0   | 21   | RDR2-sensitive |
| AGCACACTCACTCGTCGGCTTAGG  | 2   | 17   | RDR2-sensitive |
| AGCACACTCGGCATAGTCAGACAC  | 0   | 16   | RDR2-sensitive |
| AGCACAGACCTGGGCACCGGCTTA  | 0   | 10   | RDR2-sensitive |
| AGCACAGATGTGGTATAAATTGTT  | 31  | 2    | RDR2-resistant |
| AGCACAGTCCAGCTAGACTCGGAT  | 0   | 16   | RDR2-sensitive |
| AGCACAGTGCTGTAGGGGGTGAAT  | 0   | 12   | RDR2-sensitive |
| AGCACATGGACCTGATGGCTTTAA  | 16  | 0    | RDR2-resistant |
| AGCACATGTAGAACATGTTTCGGTT | 0   | 10   | RDR2-sensitive |
| AGCACATTTTGTGGTTGTTGGA    | 0   | 13   | RDR2-sensitive |
| AGCACAGTTTCAACGGTCGTCGT   | 0   | 133  | RDR2-sensitive |
| AGCACAGTTTTGATGGTCGTCGT   | 0   | 9    | RDR2-sensitive |
| AGCACCTGAACCCGGCTCTGCAG   | 0   | 11   | RDR2-sensitive |
| AGCACCGCAGGGGACTTCGACAGG  | 53  | 0    | RDR2-resistant |
| AGCACCGCGCGGACGAGGACGGCG  | 0   | 11   | RDR2-sensitive |
| AGCACCGTTGGATATGGAGGGTGT  | 0   | 26   | RDR2-sensitive |
| AGCACCGTTGGATGTAGAGGGTGT  | 0   | 133  | RDR2-sensitive |
| AGCACCGTTGGATGTGAAAGGCGT  | 1   | 40   | RDR2-sensitive |
| AGCACCGTTGGATGTGAAAGGTGT  | 1   | 15   | RDR2-sensitive |
| AGCACCGTTGGATGTGAAGGGTGT  | 6   | 69   | RDR2-sensitive |
| AGCACCGTTGGATGTGGAAGGTGT  | 4   | 251  | RDR2-sensitive |
| AGCACCGTTGGATGTGGAGGATGT  | 0   | 14   | RDR2-sensitive |
| AGCACCGTTGGATGTGGAGGGGGT  | 5   | 53   | RDR2-sensitive |
| AGCACCGTTGGATGTGGAGGGTAT  | 0   | 72   | RDR2-sensitive |
| AGCACCGTTGGATGTGGAGGGTGG  | 0   | 21   | RDR2-sensitive |
| AGCACCGTTGGATGTGGAGGGTGT  | 172 | 2158 | RDR2-sensitive |
| AGCACCGTTGGATGTGGTGGTGTG  | 0   | 19   | RDR2-sensitive |
| AGCACCTGCAGAACATCGGCCGACA | 0   | 15   | RDR2-sensitive |
| AGCACGAATTGCATTCGGGTCGGA  | 0   | 9    | RDR2-sensitive |
| AGCACGACCCAGTAGAGCAGGCAG  | 0   | 41   | RDR2-sensitive |
| AGCACGACCCTCTGTTTCGACGTCA | 0   | 13   | RDR2-sensitive |
| AGCACGCCTTATATTGTGGGACAA  | 0   | 9    | RDR2-sensitive |
| AGCACGCGCAGATGTAGGCAACCA  | 0   | 12   | RDR2-sensitive |
| AGCACGCGGATGAGGGATGCGGAT  | 0   | 14   | RDR2-sensitive |
| AGCACGGACTGTTTCGGTGCGACGC | 0   | 11   | RDR2-sensitive |
| AGCACGGACTTATGCAGAGGAGCT  | 0   | 34   | RDR2-sensitive |
| AGCACGGCACAGATCTGGCACGAC  | 0   | 15   | RDR2-sensitive |
| AGCACGGCACGGAATTGAATCGGA  | 0   | 22   | RDR2-sensitive |
| AGCACGGCCTGAAGACGGATCTAG  | 0   | 38   | RDR2-sensitive |
| AGCACGGCGGGCTTTAACGGGCTG  | 0   | 14   | RDR2-sensitive |
| AGCACGGCTAGGCCTGACACGGAT  | 0   | 15   | RDR2-sensitive |
| AGCACGGGGTTCGCGGACTCGGCC  | 1   | 19   | RDR2-sensitive |
| AGCACGGTCCAGGCACGACCCGGT  | 0   | 9    | RDR2-sensitive |
| AGCACGGTCTGAAGGCGGGTCTGA  | 0   | 21   | RDR2-sensitive |
| AGCACGGTTCAAAGGTAGGAGCGA  | 0   | 9    | RDR2-sensitive |

|                           |    |     |                |
|---------------------------|----|-----|----------------|
| AGCACGTCACGGTTAGAGCACGGC  | 0  | 14  | RDR2-sensitive |
| AGCACGTCTCGTTGGACATGCATG  | 0  | 18  | RDR2-sensitive |
| AGCACGTGTGTCTAGTCATCGGTC  | 0  | 9   | RDR2-sensitive |
| AGCACGTTAGACGGGCTGGGTCGT  | 0  | 34  | RDR2-sensitive |
| AGCACTAGCGGCACTGGAAAACGC  | 0  | 12  | RDR2-sensitive |
| AGCACTATAGAATTGACGTGGCGT  | 0  | 20  | RDR2-sensitive |
| AGCACTCGACAAAGACTTCGGCAC  | 0  | 11  | RDR2-sensitive |
| AGCACTCGGCAAAGACGTTGGCAC  | 0  | 42  | RDR2-sensitive |
| AGCACTCGGCAAAGCCACCGGCAC  | 2  | 56  | RDR2-sensitive |
| AGCACTCGGCAAAGCCGTCGGCAC  | 0  | 15  | RDR2-sensitive |
| AGCACTCGGCAAAGCCTCCGGCAC  | 0  | 50  | RDR2-sensitive |
| AGCACTCGGCAAAGCCTTCGGCAC  | 0  | 12  | RDR2-sensitive |
| AGCACTCGGCAAAGCGGTGACTC   | 0  | 11  | RDR2-sensitive |
| AGCACTCGGCAAAGCTGTGGCAC   | 0  | 17  | RDR2-sensitive |
| AGCACTCGGCAAAGGAACTGGCAA  | 1  | 13  | RDR2-sensitive |
| AGCACTCGGCAAAGTCTTCGGCAC  | 0  | 9   | RDR2-sensitive |
| AGCACTCGGCAAATCGTCTGGCAC  | 0  | 27  | RDR2-sensitive |
| AGCACTCGGCAAGGTAAGGAGCGA  | 0  | 9   | RDR2-sensitive |
| AGCACTGGAAGGGCACAGCTGAGA  | 0  | 15  | RDR2-sensitive |
| AGCACTGGAAGGGCATAGCTGAGA  | 0  | 16  | RDR2-sensitive |
| AGCACTGGACAAGCACTGCGCCGC  | 0  | 16  | RDR2-sensitive |
| AGCACTGGCGGCACTGAAAAACAC  | 1  | 44  | RDR2-sensitive |
| AGCACTGGCGGCACTGAAAAACGC  | 4  | 117 | RDR2-sensitive |
| AGCACTGGCGGCACTGAAAAACGT  | 0  | 20  | RDR2-sensitive |
| AGCACTGGCGGCACTGAAAAGCGC  | 1  | 105 | RDR2-sensitive |
| AGCACTGGCGGCACTGAAAAGCGT  | 0  | 23  | RDR2-sensitive |
| AGCACTGGCGGCACTGAGAAACGC  | 3  | 17  | RDR2-sensitive |
| AGCACTGTAGACACGGCTGCAGGT  | 0  | 14  | RDR2-sensitive |
| AGCACTGTAGCAGATTTAGGGCGT  | 1  | 58  | RDR2-sensitive |
| AGCACTGTAGCAGATTTAGGGGCT  | 0  | 12  | RDR2-sensitive |
| AGCACTGTAGCAGCGCTAGGGGGC  | 1  | 14  | RDR2-sensitive |
| AGCACTGTTAGATCCGGCACGGAT  | 0  | 13  | RDR2-sensitive |
| AGCACTGTTAGGTACTGGACGGAT  | 0  | 30  | RDR2-sensitive |
| AGCAGAACCGGGAATGACAGACTA  | 0  | 19  | RDR2-sensitive |
| AGCAGAACCGGTAGAACGGACGACT | 1  | 14  | RDR2-sensitive |
| AGCAGAACTCAAACCGGACGACAC  | 0  | 10  | RDR2-sensitive |
| AGCAGAACTCTACGAGCCAGGCC   | 0  | 13  | RDR2-sensitive |
| AGCAGAAGGACTTGACATGGTTT   | 25 | 0   | RDR2-resistant |
| AGCAGACCACTGTGATGCGGCGC   | 15 | 0   | RDR2-resistant |
| AGCAGACCAGCAGAAGAACTCCAG  | 1  | 14  | RDR2-sensitive |
| AGCAGACCCTAGCGACATGGATAT  | 0  | 9   | RDR2-sensitive |
| AGCAGACGCGACAGTGGCACCCGG  | 0  | 11  | RDR2-sensitive |
| AGCAGACTACAGCGCTCAAGCCGG  | 0  | 12  | RDR2-sensitive |
| AGCAGACTAGTATATTTGTGCATA  | 34 | 1   | RDR2-resistant |
| AGCAGACTGCTTCTCTCACGGC    | 0  | 16  | RDR2-sensitive |
| AGCAGACTGTCCATATTTGTAGC   | 31 | 0   | RDR2-resistant |
| AGCAGACTGTGAAGTTGGACGGTA  | 0  | 24  | RDR2-sensitive |
| AGCAGACTGTGTTGCCGGTATGGT  | 0  | 14  | RDR2-sensitive |
| AGCAGACTGTTGCGCGACATCGAA  | 0  | 15  | RDR2-sensitive |

|                          |     |    |                |
|--------------------------|-----|----|----------------|
| AGCAGACTGTTGTAAGGGTGGCAC | 0   | 24 | RDR2-sensitive |
| AGCAGACTTCGACAGAGCCTTGGT | 0   | 9  | RDR2-sensitive |
| AGCAGAGACTGCAGGATGGTTGCC | 0   | 20 | RDR2-sensitive |
| AGCAGAGAGAGAGCACGTGAACGC | 0   | 10 | RDR2-sensitive |
| AGCAGAGATGATTAGAGCTGATAA | 0   | 10 | RDR2-sensitive |
| AGCAGAGGACTAGATTTTTCTCTA | 142 | 5  | RDR2-resistant |
| AGCAGAGGCTACGGAACGCGCAGA | 0   | 24 | RDR2-sensitive |
| AGCAGAGTCGAACGCAGAGACCAC | 0   | 36 | RDR2-sensitive |
| AGCAGATAATGGGACAGAGACGAC | 1   | 18 | RDR2-sensitive |
| AGCAGATATCGATCGGGTACCCAT | 0   | 15 | RDR2-sensitive |
| AGCAGATCGACATGAGGCCGGATT | 0   | 10 | RDR2-sensitive |
| AGCAGATCGCGGTTGCAACGCCTT | 1   | 23 | RDR2-sensitive |
| AGCAGATCTGTTCACTGGTGGGTT | 21  | 0  | RDR2-resistant |
| AGCAGATGCAGGCTTGCAGCTCTT | 1   | 55 | RDR2-sensitive |
| AGCAGATGGATAAGCTTGTAGACA | 59  | 3  | RDR2-resistant |
| AGCAGATGGTAGAGTCATGTTCTC | 0   | 12 | RDR2-sensitive |
| AGCAGATGTAGGCCACTCGCTCG  | 0   | 16 | RDR2-sensitive |
| AGCAGATTAGGCGCGAGAAGTCAT | 0   | 9  | RDR2-sensitive |
| AGCAGATTAGGCGCGAGAAGTCGT | 0   | 15 | RDR2-sensitive |
| AGCAGATTGGTCGCATCTCCAGAG | 0   | 25 | RDR2-sensitive |
| AGCAGATTGGTCGCATCTCTAGAG | 0   | 10 | RDR2-sensitive |
| AGCAGCAACGTCGAGGAAGAGCAT | 0   | 12 | RDR2-sensitive |
| AGCAGCAATCAGCGGTGAAACTC  | 0   | 9  | RDR2-sensitive |
| AGCAGCAGAGCTCATGATCGTCGA | 0   | 9  | RDR2-sensitive |
| AGCAGCAGCTTTCTGTCGTCGGGT | 9   | 36 | RDR2-sensitive |
| AGCAGCAGTGCAGGACAAGTACTT | 0   | 10 | RDR2-sensitive |
| AGCAGCGACCAAGAACGTGCCCAA | 0   | 23 | RDR2-sensitive |
| AGCAGCGACGTTGGTAGAGGGCGG | 0   | 13 | RDR2-sensitive |
| AGCAGCGGACAAGCAGCGAACAAT | 0   | 15 | RDR2-sensitive |
| AGCAGCGGATGCAACAACTTGGT  | 0   | 21 | RDR2-sensitive |
| AGCAGCGTCTCTGAACGGTCTCTC | 0   | 10 | RDR2-sensitive |
| AGCAGCTGACTGGTAGGCCTACAC | 0   | 15 | RDR2-sensitive |
| AGCAGCTTTCTGTGTCGGGTGCA  | 3   | 18 | RDR2-sensitive |
| AGCAGCTTTTGCAGTCGTCTGGTC | 0   | 12 | RDR2-sensitive |
| AGCAGGACGACGACGAAGCTCAGC | 0   | 10 | RDR2-sensitive |
| AGCAGGACGACGACACCAGCAGC  | 0   | 10 | RDR2-sensitive |
| AGCAGGACGACGACGATGCGGCGC | 1   | 22 | RDR2-sensitive |
| AGCAGGACGTGCAGATGATGGCGT | 0   | 12 | RDR2-sensitive |
| AGCAGGACTCTCGGCACAGAAATA | 0   | 12 | RDR2-sensitive |
| AGCAGGACTGCAGGAGGGCGGACG | 0   | 20 | RDR2-sensitive |
| AGCAGGACTGGATCCCACGTGCAG | 0   | 15 | RDR2-sensitive |
| AGCAGGAGAGTGTTGAACATCAGC | 17  | 1  | RDR2-resistant |
| AGCAGGAGCTGGAGCTTTGCCAAA | 0   | 13 | RDR2-sensitive |
| AGCAGGAGGACAACATGTACCCGC | 0   | 12 | RDR2-sensitive |
| AGCAGGAGGACAATATGTACCCGC | 0   | 21 | RDR2-sensitive |
| AGCAGGAGGCGAGAACGGGGCTAG | 0   | 9  | RDR2-sensitive |
| AGCAGGCCGCGGTTAGACGCTCAA | 0   | 11 | RDR2-sensitive |
| AGCAGGCTCCGCATCCCTCTCCGC | 0   | 10 | RDR2-sensitive |
| AGCAGGCTGAAGCATGTATGGCGT | 0   | 25 | RDR2-sensitive |

|                           |    |     |                |
|---------------------------|----|-----|----------------|
| AGCAGGCTGGACGATGCATGGCGC  | 0  | 17  | RDR2-sensitive |
| AGCAGGCTGTAAGGTGTTCCACGT  | 0  | 17  | RDR2-sensitive |
| AGCAGGGACGACGACGCTCAGCAG  | 0  | 12  | RDR2-sensitive |
| AGCAGGGACTGTGGTGGCGGACTG  | 0  | 12  | RDR2-sensitive |
| AGCAGGGCTGGCATGTTCATCACA  | 17 | 0   | RDR2-resistant |
| AGCAGGGGCGAGAGTGGAGGCGAG  | 1  | 15  | RDR2-sensitive |
| AGCAGGGGTGTCAGTACTATGGAA  | 0  | 13  | RDR2-sensitive |
| AGCAGGTAAGTGGGTGCTAGACTC  | 0  | 9   | RDR2-sensitive |
| AGCAGGTAGGAGCGGCTGGGCGA   | 0  | 20  | RDR2-sensitive |
| AGCAGGTATCCTCGGACAAGTCGG  | 0  | 23  | RDR2-sensitive |
| AGCAGGTCGCAGGATAGCGGATGA  | 0  | 11  | RDR2-sensitive |
| AGCAGGTCGCGGTTGCAACGCCTT  | 2  | 16  | RDR2-sensitive |
| AGCAGGTCGGCATGACGTGTCTGG  | 0  | 13  | RDR2-sensitive |
| AGCAGGTTGTGACAGCTTCGACGC  | 0  | 9   | RDR2-sensitive |
| AGCAGTAAGAAAATATGGACAATT  | 29 | 3   | RDR2-resistant |
| AGCAGTAGAGACGCAAGAAGCTGT  | 1  | 27  | RDR2-sensitive |
| AGCAGTAGAGGCGCAAGAAGATGT  | 0  | 16  | RDR2-sensitive |
| AGCAGTAGAGGCGCAAGAAGCTGT  | 0  | 12  | RDR2-sensitive |
| AGCAGTAGTTTGGACCGAGCGGCT  | 0  | 18  | RDR2-sensitive |
| AGCAGTCGCGAGTACGCTCCCCAA  | 1  | 20  | RDR2-sensitive |
| AGCAGTCGGCATATGCTACGGAGT  | 1  | 15  | RDR2-sensitive |
| AGCAGTCGTCTGTAGTCGACGGCC  | 0  | 17  | RDR2-sensitive |
| AGCAGTCTGGCACGTTTCATCCTGT | 0  | 10  | RDR2-sensitive |
| AGCAGTTGAGAGTAGTGAAGGCG   | 49 | 3   | RDR2-resistant |
| AGCATAAGAGTGAACGAGGGCGT   | 1  | 64  | RDR2-sensitive |
| AGCATAATATCCGGTCTACTAGCA  | 22 | 1   | RDR2-resistant |
| AGCATACAGAGTGGACGGTGGGTT  | 1  | 26  | RDR2-sensitive |
| AGCATACCTCGGCGACAAGACCTG  | 0  | 10  | RDR2-sensitive |
| AGCATACTACCAGGACGTAGGGT   | 1  | 12  | RDR2-sensitive |
| AGCATAGGACTGAGGAGAAGGCCT  | 0  | 19  | RDR2-sensitive |
| AGCATATAGGTTTGTGGCTCGGTC  | 0  | 11  | RDR2-sensitive |
| AGCATATGATGGCTTTTACTCG    | 61 | 8   | RDR2-resistant |
| AGCATATTTTCGTCCGACGGCCGA  | 0  | 9   | RDR2-sensitive |
| AGCATCACGAGATCAAGGACGCGC  | 2  | 20  | RDR2-sensitive |
| AGCATCAGTTTCAACGGTCGTCAT  | 2  | 24  | RDR2-sensitive |
| AGCATCAGTTTTAACGGTCGTCAT  | 0  | 11  | RDR2-sensitive |
| AGCATCCAGACTACACTCGCGGAC  | 0  | 11  | RDR2-sensitive |
| AGCATCGACTGTAGGCGCCGGCGC  | 0  | 10  | RDR2-sensitive |
| AGCATCGGACTGTCCGGTGTGCAC  | 0  | 9   | RDR2-sensitive |
| AGCATCGGATACGTGTAGTCGGCA  | 0  | 11  | RDR2-sensitive |
| AGCATCGGTGTGGAAGACGACTGC  | 0  | 22  | RDR2-sensitive |
| AGCATCTGCGTACGTGCGGACGGT  | 1  | 50  | RDR2-sensitive |
| AGCATGACTGTACAAAGAGATGTT  | 39 | 1   | RDR2-resistant |
| AGCATGAGTGCACGACCGACGGAC  | 0  | 13  | RDR2-sensitive |
| AGCATGCAGGACACCGCAGGACAC  | 0  | 9   | RDR2-sensitive |
| AGCATGCATCTAGACCGGCTCTT   | 31 | 6   | RDR2-resistant |
| AGCATGCCATGATCCGGACACCAA  | 0  | 9   | RDR2-sensitive |
| AGCATGGACGAGCAGACACGACAC  | 2  | 104 | RDR2-sensitive |
| AGCATGTAGACGCCACCGACATTA  | 0  | 12  | RDR2-sensitive |



|                            |    |    |                |
|----------------------------|----|----|----------------|
| AGCATGTCGCGTAGGACAGTTCGG   | 0  | 14 | RDR2-sensitive |
| AGCATGTCGTGCTTGTCTTGGGCC   | 0  | 10 | RDR2-sensitive |
| AGCATGTGATCTAGGGGTGGCAAC   | 31 | 0  | RDR2-resistant |
| AGCATGTTTCTAGTCGGATAGGAT   | 0  | 10 | RDR2-sensitive |
| AGCATTGATCAACTTCATTAAGTT   | 19 | 1  | RDR2-resistant |
| AGCATTGATGGTGAAGTGTCTCTT   | 18 | 1  | RDR2-resistant |
| AGCATTTGTACTIONGATGACTTCAT | 23 | 0  | RDR2-resistant |
| AGCATTTTTGGCTGGTTTGGGCAT   | 14 | 0  | RDR2-resistant |
| AGCCAAATCTCGGACACTCGGCAA   | 0  | 19 | RDR2-sensitive |
| AGCCAACACTCGGCAAAGTCTCGG   | 0  | 17 | RDR2-sensitive |
| AGCCAACGGCTGGCACTCGGCAAA   | 0  | 11 | RDR2-sensitive |
| AGCCAACGGTCGGAAGGGGGCACC   | 2  | 14 | RDR2-sensitive |
| AGCCAAGTAGAACGGAGCCGTTCC   | 1  | 14 | RDR2-sensitive |
| AGCCAATACGTACGTAGGACAGGC   | 0  | 13 | RDR2-sensitive |
| AGCCAATCCTCGGGCGAAGGCAGC   | 0  | 11 | RDR2-sensitive |
| AGCCAATGTGGACTAAGCCGGGA    | 0  | 14 | RDR2-sensitive |
| AGCCACACGGCGGGATTTCGTGGAG  | 0  | 11 | RDR2-sensitive |
| AGCCACGGACGGTAAACACAACCTC  | 0  | 12 | RDR2-sensitive |
| AGCCACGGCGACTCTAACGGAGAC   | 0  | 11 | RDR2-sensitive |
| AGCCACTGAACCTGAACTAGGAGA   | 0  | 17 | RDR2-sensitive |
| AGCCACTGTTTAGAGACGACGTTT   | 0  | 9  | RDR2-sensitive |
| AGCCAGAACTGTGTGAACCGGTAT   | 0  | 15 | RDR2-sensitive |
| AGCCAGAAGGACGACCGAAGACTG   | 0  | 10 | RDR2-sensitive |
| AGCCAGCTCGGGCTCGTAGCGGCT   | 0  | 15 | RDR2-sensitive |
| AGCCAGCTCGTATGTAGACGGTTA   | 0  | 9  | RDR2-sensitive |
| AGCCAGGCTGAAGAGGTTGATCAG   | 0  | 31 | RDR2-sensitive |
| AGCCAGGCTGTGGAGAAACGGGTT   | 0  | 13 | RDR2-sensitive |
| AGCCAGTAGTGTAGACGTCCACAT   | 0  | 45 | RDR2-sensitive |
| AGCCATCTGTAGCGTGACGTGTGT   | 0  | 17 | RDR2-sensitive |
| AGCCATGAATCCTGGATGAGACGT   | 0  | 13 | RDR2-sensitive |
| AGCCATGACTGGACCATGTCCGGC   | 0  | 10 | RDR2-sensitive |
| AGCCCAAACACGGCCTCGTTGGAT   | 0  | 16 | RDR2-sensitive |
| AGCCCAACAGTGGTGTCCGCCAC    | 0  | 9  | RDR2-sensitive |
| AGCCCAACCGTCCGGATGGCTGT    | 0  | 21 | RDR2-sensitive |
| AGCCCAAGCACTGTTAGATCCGGC   | 0  | 14 | RDR2-sensitive |
| AGCCCAACATCGCCAGCGTCCGGAC  | 1  | 28 | RDR2-sensitive |
| AGCCCACGAGTCGGTATGGCACA    | 1  | 29 | RDR2-sensitive |
| AGCCCACGGACTTAGATGGCCGAC   | 0  | 16 | RDR2-sensitive |
| AGCCCAGATGGGTCCGGCGGAGAC   | 0  | 13 | RDR2-sensitive |
| AGCCCAGTGTGGGAGTATCACGG    | 0  | 9  | RDR2-sensitive |
| AGCCCAAGGCAGCTAGGAGCCGT    | 0  | 16 | RDR2-sensitive |
| AGCCCAGCCAGGAGGTCGATCGG    | 0  | 14 | RDR2-sensitive |
| AGCCCAGGCACGGACTGTCCGGA    | 0  | 11 | RDR2-sensitive |
| AGCCCCTGCGCAGCTGTGGACGG    | 0  | 12 | RDR2-sensitive |
| AGCCCAGGAAGACGGCGAACTCCG   | 3  | 36 | RDR2-sensitive |
| AGCCCCTGAGCAGCAGTCGGTTGG   | 1  | 31 | RDR2-sensitive |
| AGCCCCTGCGCCAGGTCGCGGACC   | 2  | 19 | RDR2-sensitive |
| AGCCCCTGCGTCAGGTCGCGGACC   | 0  | 14 | RDR2-sensitive |
| AGCCCCTTCGCGGTGCTAGATCGT   | 3  | 30 | RDR2-sensitive |

|                            |    |     |                |
|----------------------------|----|-----|----------------|
| AGCCCGACACGGTAGAATAAGCGG   | 0  | 15  | RDR2-sensitive |
| AGCCCGAGACTCAGATGCTGCGGC   | 0  | 10  | RDR2-sensitive |
| AGCCCGCGGACTTAGACGGTGTGA   | 0  | 9   | RDR2-sensitive |
| AGCCCGCGGGCTAGCACAGCACGG   | 0  | 15  | RDR2-sensitive |
| AGCCCGGACTAATAGGAAGGCCAT   | 2  | 40  | RDR2-sensitive |
| AGCCCGGAGGACCAGAGCAGCAGA   | 1  | 15  | RDR2-sensitive |
| AGCCCGGCACAGTAGAATAAGCGG   | 0  | 67  | RDR2-sensitive |
| AGCCCGGCACGATAGAATAAGCAG   | 0  | 12  | RDR2-sensitive |
| AGCCCGGCACGATAGAATAAGCGG   | 0  | 13  | RDR2-sensitive |
| AGCCCGGCACGGTAGAATAAACGG   | 0  | 106 | RDR2-sensitive |
| AGCCCGGCACGGTAGAATAAGCGG   | 14 | 634 | RDR2-sensitive |
| AGCCCGGCACTGATACGATTGGAC   | 0  | 22  | RDR2-sensitive |
| AGCCCGGCACTGTTTTTAGGACGG   | 0  | 21  | RDR2-sensitive |
| AGCCCGGCCCTGCAGAACGGCAAG   | 0  | 9   | RDR2-sensitive |
| AGCCCGTATTATTTTCGTGTCGGAC  | 0  | 16  | RDR2-sensitive |
| AGCCCGTGGACTTAGACGGCTCGG   | 0  | 10  | RDR2-sensitive |
| AGCCCGTGTATTTCGTGTCGGAC    | 0  | 15  | RDR2-sensitive |
| AGCCCGTTAGGCCTCTGGCATGGC   | 0  | 9   | RDR2-sensitive |
| AGCCCGTTTGACCCGTGATCCGGC   | 0  | 25  | RDR2-sensitive |
| AGCCCTAGGACTATATTCGGTATT   | 1  | 29  | RDR2-sensitive |
| AGCCCTAGGCGCGGACTGTCCGGA   | 0  | 9   | RDR2-sensitive |
| AGCCCTAGTCAAACCGTCCGGACG   | 0  | 15  | RDR2-sensitive |
| AGCCCTGATTGAGAGAACACGGAT   | 0  | 59  | RDR2-sensitive |
| AGCCCTGGACGCAGCTAGCCGTTG   | 0  | 17  | RDR2-sensitive |
| AGCCCTGTAGAAGCGCAGCTGGCG   | 0  | 11  | RDR2-sensitive |
| AGCCCTGTAGTCAGCGTCGGCCCT   | 0  | 11  | RDR2-sensitive |
| AGCCGAAATCGGACGGGAACCGGT   | 0  | 11  | RDR2-sensitive |
| AGCCGACACTGTTGCAGCTGTTTG   | 0  | 44  | RDR2-sensitive |
| AGCCGACATGTAGAGGGCGCTGTA   | 0  | 25  | RDR2-sensitive |
| AGCCGACCGTTGGCTCACCGGACA   | 1  | 14  | RDR2-sensitive |
| AGCCGACGAGTGAGTGTGCCCGT    | 0  | 12  | RDR2-sensitive |
| AGCCGACGCGTAGGGGACGCTGTA   | 0  | 35  | RDR2-sensitive |
| AGCCGACGGCACACAGAAACTCAC   | 0  | 18  | RDR2-sensitive |
| AGCCGACGGCGATTTTTGGACGAA   | 0  | 17  | RDR2-sensitive |
| AGCCGACTCGGACTCGCAGTGGCT   | 0  | 12  | RDR2-sensitive |
| AGCCGACTTATGGCGTGA CT CGGA | 0  | 16  | RDR2-sensitive |
| AGCCGAGAGTGGACTGCACACGGA   | 0  | 11  | RDR2-sensitive |
| AGCCGAGCACGGAGGTGTGGGCAT   | 0  | 9   | RDR2-sensitive |
| AGCCGAGCCGAGCTGACTCTGTGG   | 0  | 10  | RDR2-sensitive |
| AGCCGAGGACAGTGTGAAGACGA    | 1  | 17  | RDR2-sensitive |
| AGCCGAGTTGGTTAGATGGTCTGA   | 0  | 10  | RDR2-sensitive |
| AGCCGATCCGAGCCGAGCCGAGCT   | 0  | 13  | RDR2-sensitive |
| AGCCGATCTGGACCCGCATAGAAC   | 0  | 13  | RDR2-sensitive |
| AGCCGATGTGGGACTAAAGCCGGA   | 0  | 14  | RDR2-sensitive |
| AGCCGATGTGGGACTAAAGCCGGG   | 4  | 96  | RDR2-sensitive |
| AGCCGCAGCCGGATTGCAGCCGCA   | 1  | 24  | RDR2-sensitive |
| AGCCGCCAGGCACAACGTGCGGAC   | 0  | 19  | RDR2-sensitive |
| AGCCGCCCTGGGAACGACGACGGC   | 0  | 11  | RDR2-sensitive |
| AGCCGCCCTGGGGAACGACGACGG   | 0  | 55  | RDR2-sensitive |

|                             |    |    |                |
|-----------------------------|----|----|----------------|
| AGCCGCGCATCGCCAGTATGGTAT    | 0  | 9  | RDR2-sensitive |
| AGCCGCTCTGTTCTGTGTTTGGTA    | 1  | 19 | RDR2-sensitive |
| AGCCGCTCTGTTGGAAGAAGGATT    | 0  | 18 | RDR2-sensitive |
| AGCCGGAACCTCTAGAGCATGGC     | 0  | 32 | RDR2-sensitive |
| AGCCGGAACGAGGACTGAAACGGC    | 0  | 17 | RDR2-sensitive |
| AGCCGGACCAGGTCCAGACGTCTA    | 0  | 9  | RDR2-sensitive |
| AGCCGGAGTGATAGAAGAGGGTAC    | 0  | 16 | RDR2-sensitive |
| AGCCGGAGTGATAGAGGAGGGTAC    | 0  | 11 | RDR2-sensitive |
| AGCCGGATTGCAGCCGCAGCAAGC    | 2  | 31 | RDR2-sensitive |
| AGCCGGATTGTAGCCGCAGCAAGC    | 0  | 15 | RDR2-sensitive |
| AGCCGGATTGTATCGGTTGGCTGC    | 0  | 28 | RDR2-sensitive |
| AGCCGGCACGAACGCAGAATACGA    | 0  | 11 | RDR2-sensitive |
| AGCCGGCTGTACGTAGACGTGAC     | 0  | 19 | RDR2-sensitive |
| AGCCGGGTTGGACTGCACGACGGG    | 0  | 28 | RDR2-sensitive |
| AGCCGGTAAGTGCTGAGCGCTCGT    | 1  | 17 | RDR2-sensitive |
| AGCCGGTCGACGTGAATGAGCGGA    | 0  | 10 | RDR2-sensitive |
| AGCCGGTGGGGTAGTCTGATGGCG    | 0  | 22 | RDR2-sensitive |
| AGCCGGTGGTTAGAATCTAGGTGT    | 2  | 31 | RDR2-sensitive |
| AGCCGGTTGTATGTTTGGATTGGC    | 27 | 4  | RDR2-resistant |
| AGCCGTATACTCTATCTGGGACGC    | 0  | 14 | RDR2-sensitive |
| AGCCGTCACTGCTGATTGTTGCCA    | 0  | 12 | RDR2-sensitive |
| AGCCGTCAAGACTGGGAACGCGGT    | 1  | 22 | RDR2-sensitive |
| AGCCGTGGAGCAATGTAAGACGTC    | 0  | 10 | RDR2-sensitive |
| AGCCGTGTCGGGTCTGGACTGGCT    | 0  | 47 | RDR2-sensitive |
| AGCCGTTGATCTACAGGGCGGAC     | 0  | 13 | RDR2-sensitive |
| AGCCGTTGGAAGTGACCGTTGGCG    | 0  | 10 | RDR2-sensitive |
| AGCCGTTGGACAGAAAGCAGCAGC    | 1  | 23 | RDR2-sensitive |
| AGCCGTTGGTGTGGAGTTGCCAT     | 0  | 10 | RDR2-sensitive |
| AGCCTAATGTTATGGACTCGCATG    | 52 | 0  | RDR2-resistant |
| AGCCTACAGGCTTAGACGGACCGG    | 0  | 11 | RDR2-sensitive |
| AGCCTACGTCGTACTIONCCAGGTGTT | 0  | 9  | RDR2-sensitive |
| AGCCTACTTTGGTGATCGCGAGCA    | 43 | 0  | RDR2-resistant |
| AGCCTAGACGGTAACTGATGGGAC    | 0  | 12 | RDR2-sensitive |
| AGCCTAGCCTCGGACAAGGGCAGC    | 2  | 37 | RDR2-sensitive |
| AGCCTAGTCGTCTGGTCTGTCGA     | 0  | 10 | RDR2-sensitive |
| AGCCTATCGCGTAGGACAGTTCGG    | 0  | 35 | RDR2-sensitive |
| AGCCTCACGGACCGGACGGATCAC    | 0  | 18 | RDR2-sensitive |
| AGCCTCAGTTGCCACGGTAGGATT    | 0  | 9  | RDR2-sensitive |
| AGCCTCAGTTGCGGACCGTCTGGA    | 0  | 9  | RDR2-sensitive |
| AGCCTCCACGGCGTCGATCTCGGT    | 0  | 12 | RDR2-sensitive |
| AGCCTCCGCGTCGGAAACCGGCC     | 0  | 21 | RDR2-sensitive |
| AGCCTCCTGTAGCAGTCTATGGTA    | 0  | 16 | RDR2-sensitive |
| AGCCTCGGACAAGGGCAGCCGACC    | 4  | 17 | RDR2-sensitive |
| AGCCTCGGATTCCGGTAGTGATAC    | 0  | 11 | RDR2-sensitive |
| AGCCTCGGATTCCGGTAGTGATGG    | 0  | 17 | RDR2-sensitive |
| AGCCTCGGATTCCGGTAGTGGTAC    | 0  | 16 | RDR2-sensitive |
| AGCCTCGGATTCTGTAGTGATGG     | 1  | 13 | RDR2-sensitive |
| AGCCTCGGCCTGTAGTGTGGCTC     | 0  | 11 | RDR2-sensitive |
| AGCCTCGGTCAGACGGGAGACGTT    | 0  | 10 | RDR2-sensitive |

|                           |     |     |                |
|---------------------------|-----|-----|----------------|
| AGCCTCTAAGGCAGGACTTAGGCA  | 0   | 11  | RDR2-sensitive |
| AGCCTCTAAGGCGGGACTTAGGCA  | 1   | 20  | RDR2-sensitive |
| AGCCTCTACGCCAGGTCGCGGACC  | 0   | 22  | RDR2-sensitive |
| AGCCTCTGCGCCTGGCTTGACACGG | 0   | 12  | RDR2-sensitive |
| AGCCTCTGTGTCAGGTCGCGGACC  | 1   | 15  | RDR2-sensitive |
| AGCCTCTTCGGACGGTCGGATGCT  | 0   | 17  | RDR2-sensitive |
| AGCCTCTTCGGACGGTCGGATGGT  | 1   | 121 | RDR2-sensitive |
| AGCCTGAACCAGACGAAGGTCGAG  | 2   | 36  | RDR2-sensitive |
| AGCCTGACCGTAGGACAGTTCGG   | 0   | 12  | RDR2-sensitive |
| AGCCTGAGCGCGCTGTCTGGGCGGC | 148 | 0   | RDR2-resistant |
| AGCCTGCAGACTTAGACGGCTTGG  | 0   | 14  | RDR2-sensitive |
| AGCCTGCAGCAACGGACGGTACAC  | 0   | 9   | RDR2-sensitive |
| AGCCTGCATCGGTTGAAACGGACG  | 0   | 12  | RDR2-sensitive |
| AGCCTGCCCCCTCTGTCTTCGGAT  | 0   | 13  | RDR2-sensitive |
| AGCCTGCTCAAGCCTTCGGACAAT  | 20  | 0   | RDR2-resistant |
| AGCCTGCTGCAGCCTGTGCACTGG  | 0   | 17  | RDR2-sensitive |
| AGCCTGCTGGAACCTCAATTGGCAT | 7   | 221 | RDR2-sensitive |
| AGCCTGCTGGAGCTCAATTGGCAT  | 0   | 43  | RDR2-sensitive |
| AGCCTGGACAGTGAGAAACGGAAT  | 0   | 18  | RDR2-sensitive |
| AGCCTGGACTAGTTGAACGGGCCA  | 0   | 9   | RDR2-sensitive |
| AGCCTGGCACGGTAGAATAAGCGG  | 0   | 26  | RDR2-sensitive |
| AGCCTGGCTCAGACTGGACTGGCT  | 0   | 9   | RDR2-sensitive |
| AGCCTGGCTGAGAGCATACAATAT  | 0   | 18  | RDR2-sensitive |
| AGCCTGGCTGTAGGGGATGAGGCT  | 0   | 16  | RDR2-sensitive |
| AGCCTGGCTGTGCATCGCGTGAGC  | 2   | 18  | RDR2-sensitive |
| AGCCTGGGCAGTGAGAAACGGAAT  | 0   | 14  | RDR2-sensitive |
| AGCCTGGGCTGTTGGTTTTCGGCGG | 0   | 13  | RDR2-sensitive |
| AGCCTGGTTCGGTAGAGCGACACGG | 3   | 41  | RDR2-sensitive |
| AGCCTGTAGGACATGGATGGGGGC  | 1   | 15  | RDR2-sensitive |
| AGCCTGTAGGTGATGGAAAGCCAA  | 0   | 9   | RDR2-sensitive |
| AGCCTGTAGGTGCGTATGTAGACA  | 0   | 10  | RDR2-sensitive |
| AGCCTGTAGTTCGGCAAGGAACGC  | 0   | 9   | RDR2-sensitive |
| AGCCTGTATAGTCGGGTCGAGGCA  | 0   | 15  | RDR2-sensitive |
| AGCCTGTGCGTAGGACAGTTCGG   | 2   | 117 | RDR2-sensitive |
| AGCCTGTGCGTAGGATAGTTCGG   | 1   | 22  | RDR2-sensitive |
| AGCCTGTGAATGCTGGGAACACGG  | 0   | 12  | RDR2-sensitive |
| AGCCTGTGCACTGGAGCAGCAGAG  | 0   | 25  | RDR2-sensitive |
| AGCCTGTGCACTGGAGCAGCAGGG  | 0   | 27  | RDR2-sensitive |
| AGCCTGTGTGGATGAAGATAGCGT  | 0   | 11  | RDR2-sensitive |
| AGCCTGTTGCGGTAGAAACGCGGT  | 0   | 10  | RDR2-sensitive |
| AGCCTGTTCTGCAAGCTCGTTGGA  | 0   | 12  | RDR2-sensitive |
| AGCCTGTTGGAACCTCAATTGGCAT | 0   | 22  | RDR2-sensitive |
| AGCCTTAATTTTTGGTATGTCTGGG | 0   | 12  | RDR2-sensitive |
| AGCCTTAGACTGTGTTCAACGGAC  | 0   | 9   | RDR2-sensitive |
| AGCCTTAGTCTGTGGAGCGGTAAG  | 0   | 12  | RDR2-sensitive |
| AGCCTTATGTTTCGATGACTGGCAT | 0   | 9   | RDR2-sensitive |
| AGCCTTATTTTCGGCGGCGTCTGA  | 0   | 9   | RDR2-sensitive |
| AGCCTTCAGCTCGGGCTACTCGGC  | 0   | 13  | RDR2-sensitive |
| AGCCTTCGTCGCTGTCTGTTGCAAG | 0   | 11  | RDR2-sensitive |

|                             |     |    |                |
|-----------------------------|-----|----|----------------|
| AGCCTTCGTCGGAGAAGGATGGCG    | 1   | 15 | RDR2-sensitive |
| AGCCTTCTTTGCCGAGTGCCCGAC    | 0   | 12 | RDR2-sensitive |
| AGCCTTGCTAGTGCTGTCGTCGAA    | 0   | 12 | RDR2-sensitive |
| AGCCTTGCTGACTATAGGACCGAT    | 0   | 12 | RDR2-sensitive |
| AGCCTTGCTTCTTGGTCGTCGCGG    | 0   | 11 | RDR2-sensitive |
| AGCCTTGGCTGTATGGTATATGGA    | 0   | 14 | RDR2-sensitive |
| AGCCTTGGGCTTTTGATTTGGCTT    | 16  | 0  | RDR2-resistant |
| AGCCTTGTATCGGCCGGACACGGT    | 0   | 12 | RDR2-sensitive |
| AGCCTTGTGTGATCTGACGTGCAT    | 0   | 17 | RDR2-sensitive |
| AGCCTTTCGCGTAGGACAGTTCGG    | 0   | 13 | RDR2-sensitive |
| AGCCTTTCGCTCAGGTCGCGGACC    | 0   | 22 | RDR2-sensitive |
| AGCCTTTCGCTTAGGTCGCGGACC    | 0   | 15 | RDR2-sensitive |
| AGCCTTTTAGGACTGGTTTGGCAG    | 0   | 10 | RDR2-sensitive |
| AGCCTTTTCATCTTTAAGTCGGTT    | 40  | 63 | RDR2-sensitive |
| AGCCTTTTCGGACTIONTGGGCCGGGC | 0   | 10 | RDR2-sensitive |
| AGCCTTTTGTGCGGCCACTCGGCAA   | 0   | 26 | RDR2-sensitive |
| AGCGAAAGTCTACGGCTTGTTACT    | 16  | 0  | RDR2-resistant |
| AGCGAACGATGGAAGAACTGGCGC    | 0   | 10 | RDR2-sensitive |
| AGCGAACTCGGAAAAGAGGCTCGG    | 0   | 26 | RDR2-sensitive |
| AGCGAACTGTACATCGGCAACTGC    | 0   | 19 | RDR2-sensitive |
| AGCGAAGACTGCATGGACAGACGC    | 0   | 21 | RDR2-sensitive |
| AGCGAAGGCCTCGAGCGAAGGGTG    | 0   | 13 | RDR2-sensitive |
| AGCGAAGTGAGCACACTGTACGAT    | 0   | 9  | RDR2-sensitive |
| AGCGAAGTTGGACGCCAAGGCTGC    | 0   | 9  | RDR2-sensitive |
| AGCGAATCGGGCTATGCCGGACGG    | 0   | 15 | RDR2-sensitive |
| AGCGACAATCTCACTCGTCCGGTCC   | 0   | 13 | RDR2-sensitive |
| AGCGACAATTTACTCGTCCGGTCCA   | 0   | 24 | RDR2-sensitive |
| AGCGACACAGGAGGCCAAGGATAT    | 176 | 8  | RDR2-resistant |
| AGCGACACTGTAGTGCGGACATAT    | 0   | 9  | RDR2-sensitive |
| AGCGACAGAGCTCATAATCGTCGA    | 0   | 9  | RDR2-sensitive |
| AGCGACAGAGCTCATGATCGTCGA    | 0   | 45 | RDR2-sensitive |
| AGCGACAGATACGGAAGAGGACAG    | 0   | 13 | RDR2-sensitive |
| AGCGACAGGCGTAGACACCCGGCA    | 0   | 10 | RDR2-sensitive |
| AGCGACAGTAGAAGTTGGGAGGCG    | 0   | 9  | RDR2-sensitive |
| AGCGACCAGCACGACAGACGAACT    | 1   | 23 | RDR2-sensitive |
| AGCGACCAGCACGACGGACGAACT    | 0   | 10 | RDR2-sensitive |
| AGCGACCAGCACGATGGACGAACT    | 0   | 11 | RDR2-sensitive |
| AGCGACCAGTACGATCGGACGGAC    | 0   | 20 | RDR2-sensitive |
| AGCGACCGAACTCCGGATAAGCAG    | 0   | 9  | RDR2-sensitive |
| AGCGACCGACGGATGACACGGACG    | 0   | 11 | RDR2-sensitive |
| AGCGACGACTTTGGGACACCCGGCT   | 0   | 9  | RDR2-sensitive |
| AGCGACGCGGTAGAAGCGAAGGAG    | 0   | 16 | RDR2-sensitive |
| AGCGACGGCACTTACAACGAGCAT    | 0   | 12 | RDR2-sensitive |
| AGCGACGGCACTTACAGCGACCAT    | 0   | 29 | RDR2-sensitive |
| AGCGACGTAGGACGCCGACGACGG    | 0   | 13 | RDR2-sensitive |
| AGCGACGTTGTGCTGAGCCGGCCT    | 0   | 9  | RDR2-sensitive |
| AGCGACTCCTACTCTGTGGATGGT    | 0   | 26 | RDR2-sensitive |
| AGCGACTCTGAGTGACACAGGACAG   | 0   | 22 | RDR2-sensitive |
| AGCGACTGAAGAGTTGGAGGCCAA    | 0   | 19 | RDR2-sensitive |

|                           |    |     |                |
|---------------------------|----|-----|----------------|
| AGCGACTGCAGCGAAAGGCGACGA  | 1  | 28  | RDR2-sensitive |
| AGCGACTGCAGCGAAGGCCTCGAG  | 2  | 46  | RDR2-sensitive |
| AGCGACTGCAGCGAGAGACGACGA  | 1  | 120 | RDR2-sensitive |
| AGCGACTGCATCGCGCTGCCGATC  | 35 | 0   | RDR2-resistant |
| AGCGACTGGAACAGGAACGAAGAC  | 0  | 20  | RDR2-sensitive |
| AGCGACTGGTTGTAAGATGGCGTA  | 0  | 11  | RDR2-sensitive |
| AGCGACTGTCGTGCCAGGCCGGGC  | 0  | 17  | RDR2-sensitive |
| AGCGACTTCTTGAACGATAGGCTC  | 0  | 10  | RDR2-sensitive |
| AGCGACTTGCGACTTCGACGGAGA  | 0  | 14  | RDR2-sensitive |
| AGCGAGAAAGACGAAGGCTGGAGC  | 0  | 11  | RDR2-sensitive |
| AGCGAGAACACCCTGACGTCGT    | 0  | 9   | RDR2-sensitive |
| AGCGAGACATGGTTGATTTATGAC  | 21 | 0   | RDR2-resistant |
| AGCGAGACCAGGCTTGTTGGACGG  | 0  | 10  | RDR2-sensitive |
| AGCGAGACCGTCTGACGACGACAT  | 0  | 30  | RDR2-sensitive |
| AGCGAGACGGATCATGTACAACCTT | 0  | 12  | RDR2-sensitive |
| AGCGAGACTGCAAGAGACGCGGGT  | 0  | 12  | RDR2-sensitive |
| AGCGAGAGACGACGAGCGAAGGAT  | 0  | 21  | RDR2-sensitive |
| AGCGAGAGACGACGAGCGAAGGGT  | 3  | 32  | RDR2-sensitive |
| AGCGAGAGTAGGACACTCGGCATA  | 0  | 15  | RDR2-sensitive |
| AGCGAGATCTAGCTTGTCGAGCGG  | 0  | 13  | RDR2-sensitive |
| AGCGAGCCAGCGAGCCACGAGCAT  | 0  | 31  | RDR2-sensitive |
| AGCGAGCCAGGCTGAGACCGGTGA  | 0  | 10  | RDR2-sensitive |
| AGCGAGCGGACGGTGCAGATTCAC  | 0  | 29  | RDR2-sensitive |
| AGCGAGCGTTGGGCAGTGATGGAC  | 0  | 12  | RDR2-sensitive |
| AGCGAGCTAGCGAGCCACGAGCAT  | 0  | 11  | RDR2-sensitive |
| AGCGAGCTATAGAACAGGGGGCAT  | 0  | 67  | RDR2-sensitive |
| AGCGAGCTGGGACTGGGAGAGGCA  | 0  | 15  | RDR2-sensitive |
| AGCGAGGACGAACGTTGTTGCTCC  | 0  | 24  | RDR2-sensitive |
| AGCGAGGACGACGTCAATCTCAA   | 0  | 9   | RDR2-sensitive |
| AGCGAGGATGGAATCGCAGTCGGA  | 0  | 10  | RDR2-sensitive |
| AGCGAGGCCATAGACCAGAGGACA  | 0  | 24  | RDR2-sensitive |
| AGCGAGGGAACGAACGATGACGT   | 0  | 9   | RDR2-sensitive |
| AGCGAGGGACTCGGACACTCGGCA  | 0  | 9   | RDR2-sensitive |
| AGCGAGGGCGTCCACCAACCTGAC  | 0  | 12  | RDR2-sensitive |
| AGCGAGTCATGAGTTAACGGGATC  | 17 | 0   | RDR2-resistant |
| AGCGATAGAGGACTGAATGGAGGC  | 0  | 33  | RDR2-sensitive |
| AGCGATAGCGGCAACTTTTTTCATT | 27 | 0   | RDR2-resistant |
| AGCGATATGTAGAGTTGATTGCAT  | 0  | 11  | RDR2-sensitive |
| AGCGATCGCGTGAAACGAGGCGTC  | 0  | 9   | RDR2-sensitive |
| AGCGATCGGTAAGAACGGCGGAC   | 0  | 17  | RDR2-sensitive |
| AGCGATCGGTTAGGATAAGCGTAA  | 0  | 21  | RDR2-sensitive |
| AGCGATCTCAAGACCCGGCCACC   | 0  | 19  | RDR2-sensitive |
| AGCGATCTGGCACAGTAGCGGCTC  | 2  | 18  | RDR2-sensitive |
| AGCGATCTGTAGAAGCGTGTTCATT | 0  | 13  | RDR2-sensitive |
| AGCGATGACGGTCTGACTCAACGG  | 0  | 18  | RDR2-sensitive |
| AGCGATGATCGCGCTGACATCCT   | 0  | 21  | RDR2-sensitive |
| AGCGATGCGGATGGACGCTCCAGA  | 0  | 12  | RDR2-sensitive |
| AGCGATGGAGTGGAGCACGGTCTG  | 0  | 10  | RDR2-sensitive |
| AGCGATGGGACTCACGTACGGTGC  | 1  | 26  | RDR2-sensitive |

|                           |     |     |                |
|---------------------------|-----|-----|----------------|
| AGCGATGGTAGGACCAGGCGACCA  | 0   | 9   | RDR2-sensitive |
| AGCGATGTGGTAGTATGTGGGCAT  | 0   | 13  | RDR2-sensitive |
| AGCGATGTGTATGACTGCGGCGTG  | 0   | 10  | RDR2-sensitive |
| AGCGATTACATAGTTGGACATCAT  | 0   | 11  | RDR2-sensitive |
| AGCGATTCCGACGGAGCAGGACGT  | 0   | 10  | RDR2-sensitive |
| AGCGATTGGGACAACGACGTCATT  | 0   | 17  | RDR2-sensitive |
| AGCGATTGTATGTAGAGACGTTCT  | 0   | 9   | RDR2-sensitive |
| AGCGATTTGCGCGAACGACGGCTC  | 1   | 14  | RDR2-sensitive |
| AGCGCACAAAGAATTCATGGCCGGT | 0   | 14  | RDR2-sensitive |
| AGCGCACAGTAGAAAAACCGGCGA  | 0   | 41  | RDR2-sensitive |
| AGCGCACCGCGATGGCAGAACCGC  | 0   | 9   | RDR2-sensitive |
| AGCGCACCTGGTCGGTTTCTGGTC  | 0   | 11  | RDR2-sensitive |
| AGCGCACGGACGGACGGTGTAGAT  | 0   | 10  | RDR2-sensitive |
| AGCGCACTCGGCAAAGGGACTGGC  | 0   | 21  | RDR2-sensitive |
| AGCGCAGAACTTTGCCGAGTGCGG  | 0   | 13  | RDR2-sensitive |
| AGCGCAGCGACGACGACAACTCTC  | 0   | 14  | RDR2-sensitive |
| AGCGCAGGACTCTGCCGAGAGCGG  | 0   | 31  | RDR2-sensitive |
| AGCGCAGGACTTTGCCGAGTGCGG  | 3   | 45  | RDR2-sensitive |
| AGCGCAGGTTGTATGGACAGACGC  | 0   | 31  | RDR2-sensitive |
| AGCGCATCTGAGCATGTAGACGCC  | 1   | 215 | RDR2-sensitive |
| AGCGCCGAGCTCTGACGTGGCGAC  | 0   | 17  | RDR2-sensitive |
| AGCGCCGTAGATCTTGACAGACGT  | 0   | 42  | RDR2-sensitive |
| AGCGCCTGCTCGGACGGAGGACGG  | 1   | 37  | RDR2-sensitive |
| AGCGCGAACACAAGTCGGAGACAT  | 0   | 12  | RDR2-sensitive |
| AGCGCGAACATAAGTCGGAGACAA  | 0   | 22  | RDR2-sensitive |
| AGCGCGACACTAGCAAGACCCGAG  | 0   | 9   | RDR2-sensitive |
| AGCGCGACAGCAGATACAAAGGCG  | 0   | 26  | RDR2-sensitive |
| AGCGCGACCGAGAACTGGCGTGAC  | 0   | 12  | RDR2-sensitive |
| AGCGCGACGGCAGAACCGTGCACT  | 0   | 15  | RDR2-sensitive |
| AGCGCGATCACAACTCGGAGGCAT  | 0   | 23  | RDR2-sensitive |
| AGCGCGATCGCAACTCGGAGGCAT  | 0   | 15  | RDR2-sensitive |
| AGCGCGATGGCAGAACCAAACTAT  | 0   | 10  | RDR2-sensitive |
| AGCGCGATTCCAACCTCGGAGGCAT | 0   | 17  | RDR2-sensitive |
| AGCGCGCGATGGCAGAATTAAGGT  | 0   | 10  | RDR2-sensitive |
| AGCGCGCTGTTGGAGCACGGTCAG  | 0   | 12  | RDR2-sensitive |
| AGCGCGGACTTATCCAACGGCTGT  | 0   | 32  | RDR2-sensitive |
| AGCGCGGCGTGTTGTAGTCCCGGC  | 0   | 23  | RDR2-sensitive |
| AGCGCGGCTTGAAGACGGGTCTGG  | 0   | 13  | RDR2-sensitive |
| AGCGCGGGCGAGAGCGAGGCGATA  | 0   | 25  | RDR2-sensitive |
| AGCGCGGTGGTGGAGAAGTTGGCG  | 116 | 5   | RDR2-resistant |
| AGCGCGTAGACCACTGAACACGGA  | 0   | 14  | RDR2-sensitive |
| AGCGCTCAACTGTGGGACGGCTGC  | 0   | 22  | RDR2-sensitive |
| AGCGCTCGCGAACTTTATGGCGTA  | 0   | 14  | RDR2-sensitive |
| AGCGCTCGTGAACTTTATGGCGGA  | 0   | 57  | RDR2-sensitive |
| AGCGCTCTGCAGTATGATGTCGTT  | 0   | 10  | RDR2-sensitive |
| AGCGCTGACTCTTGGCATTCTCTT  | 291 | 35  | RDR2-resistant |
| AGCGCTGACTGTATATAGCGAGGC  | 0   | 10  | RDR2-sensitive |
| AGCGCTGCGGACACGGTGTTGCTC  | 0   | 9   | RDR2-sensitive |
| AGCGCTGGTGCTGCAGTCAGGACA  | 0   | 9   | RDR2-sensitive |

|                            |     |     |                |
|----------------------------|-----|-----|----------------|
| AGCGCTGGTGCTGTAGTCAGGACA   | 0   | 12  | RDR2-sensitive |
| AGCGCTGTGTGACGGTGAAGACGT   | 0   | 217 | RDR2-sensitive |
| AGCGCTGTTGTGACTGGTCGTTGT   | 1   | 15  | RDR2-sensitive |
| AGCGCTTCGTCTCGCAGTCGGCAT   | 3   | 40  | RDR2-sensitive |
| AGCGGAACAACACTACGGTCGGAAAC | 0   | 9   | RDR2-sensitive |
| AGCGGAAGACGTCTCGATGTAGAC   | 3   | 33  | RDR2-sensitive |
| AGCGGAAGTAGAAGCAGCGGAGGC   | 5   | 24  | RDR2-sensitive |
| AGCGGAATAGTCAGCAGCAGCAGT   | 0   | 10  | RDR2-sensitive |
| AGCGGACAGAACAATTTACCGGTT   | 0   | 10  | RDR2-sensitive |
| AGCGGACAGAACCATTTAGCGGTC   | 0   | 13  | RDR2-sensitive |
| AGCGGACAGAACCATTTAGGGGTC   | 1   | 15  | RDR2-sensitive |
| AGCGGACAGATGGTGCAGATTCAT   | 0   | 11  | RDR2-sensitive |
| AGCGGACAGCATGGATTTCCGCCA   | 0   | 17  | RDR2-sensitive |
| AGCGGACAGCGGCACAGGCAGCAG   | 0   | 9   | RDR2-sensitive |
| AGCGGACAGGACGGTTTACAGACC   | 0   | 35  | RDR2-sensitive |
| AGCGGACAGGGGAGGGCAGAACGG   | 0   | 16  | RDR2-sensitive |
| AGCGGACATGAGCATTTAGCGGCT   | 0   | 12  | RDR2-sensitive |
| AGCGGACCCTGTTAGACGGTGAGC   | 0   | 9   | RDR2-sensitive |
| AGCGGACCTGAAGTAGAGAGACAC   | 0   | 25  | RDR2-sensitive |
| AGCGGACCTTGCTGGAGAAGTAAA   | 0   | 16  | RDR2-sensitive |
| AGCGGACCTTGTTGGAGATAGCCT   | 1   | 41  | RDR2-sensitive |
| AGCGGACCTTTTAGCGGATGTTGT   | 0   | 10  | RDR2-sensitive |
| AGCGGACGAAGACGTGCCGAACGC   | 0   | 17  | RDR2-sensitive |
| AGCGGACGAAGCGAGCAGTCGCGA   | 0   | 18  | RDR2-sensitive |
| AGCGGACGAGCGGCGACAACGCAC   | 1   | 33  | RDR2-sensitive |
| AGCGGACGCGCGGCAGAACGCACC   | 0   | 26  | RDR2-sensitive |
| AGCGGACGCTAACTGCGGGCGACT   | 0   | 19  | RDR2-sensitive |
| AGCGGACGCTCAGCAAGGCGGGAG   | 0   | 9   | RDR2-sensitive |
| AGCGGACGGACGACGGCAGCGCAC   | 0   | 12  | RDR2-sensitive |
| AGCGGACGGATACAGAGTGTCAACA  | 0   | 11  | RDR2-sensitive |
| AGCGGACGGCATGGATTTCCGCCA   | 1   | 39  | RDR2-sensitive |
| AGCGGACGGCCACTAGTGGACAGC   | 0   | 22  | RDR2-sensitive |
| AGCGGACGGCCGTTACTTTACCGA   | 0   | 9   | RDR2-sensitive |
| AGCGGACGGCTGTGTTTGACGCTA   | 1   | 26  | RDR2-sensitive |
| AGCGGACGGCTGTGTTTGCGGCTA   | 0   | 20  | RDR2-sensitive |
| AGCGGACGGTGCAGATTCACCGAA   | 0   | 31  | RDR2-sensitive |
| AGCGGACGTTGTTGGGCGGAGACC   | 0   | 33  | RDR2-sensitive |
| AGCGGACTGACGGTGTAGATTTAC   | 0   | 13  | RDR2-sensitive |
| AGCGGACTGAGCTGAGGTATGGCG   | 0   | 10  | RDR2-sensitive |
| AGCGGACTTCACCCAGGTGCACGC   | 0   | 12  | RDR2-sensitive |
| AGCGGAGACTGCATGGAGTGCCT    | 1   | 76  | RDR2-sensitive |
| AGCGGAGACTGCATGGAGTGTGCT   | 0   | 20  | RDR2-sensitive |
| AGCGGAGACTGTATGGAGTGCCT    | 2   | 34  | RDR2-sensitive |
| AGCGGAGAGGACGCTGAATATGGC   | 111 | 5   | RDR2-resistant |
| AGCGGAGATGCAGAACACGTCCGC   | 0   | 9   | RDR2-sensitive |
| AGCGGAGCACGTAGGGCAGAGGCA   | 0   | 16  | RDR2-sensitive |
| AGCGGAGCGGCTCCTGAAGTCTAT   | 0   | 21  | RDR2-sensitive |
| AGCGGAGCGGCTCCTGATGTCCAT   | 0   | 16  | RDR2-sensitive |
| AGCGGAGCTCATGTAGGGTCCGGA   | 0   | 13  | RDR2-sensitive |



|                           |    |     |                |
|---------------------------|----|-----|----------------|
| AGCGGAGCTCGTTCGTACCTCGGC  | 0  | 13  | RDR2-sensitive |
| AGCGGAGCTGCTCACACGTACAG   | 0  | 13  | RDR2-sensitive |
| AGCGGAGGAGAGCTAGCGCCCTAA  | 1  | 19  | RDR2-sensitive |
| AGCGGAGGCAGAACGGGTTGGTGT  | 0  | 24  | RDR2-sensitive |
| AGCGGAGGCATAGCTCAACGCCAG  | 0  | 12  | RDR2-sensitive |
| AGCGGAGGGACGGCAGAACCGTGC  | 0  | 17  | RDR2-sensitive |
| AGCGGAGTAGAGCAGTTTGGTAGC  | 35 | 6   | RDR2-resistant |
| AGCGGATACGGATAACAAGGACCAA | 0  | 11  | RDR2-sensitive |
| AGCGGATCCTGAAAACGACGGAGT  | 4  | 32  | RDR2-sensitive |
| AGCGGATCGTGCTGTGCCGGCCCA  | 0  | 12  | RDR2-sensitive |
| AGCGGATCTCGAGACGACGTCCGC  | 0  | 9   | RDR2-sensitive |
| AGCGGATCTGGTTTCGGCTAATTT  | 2  | 17  | RDR2-sensitive |
| AGCGGATGACCCTACCAGCCACGC  | 0  | 14  | RDR2-sensitive |
| AGCGGATGAGACGTATGCTATCTG  | 0  | 33  | RDR2-sensitive |
| AGCGGATGGGGGCTGGCGACGCGC  | 21 | 1   | RDR2-resistant |
| AGCGGATGGTACACTACACATGGT  | 0  | 89  | RDR2-sensitive |
| AGCGGATTGACGTTGTGCGCGAA   | 0  | 11  | RDR2-sensitive |
| AGCGGATTTTCAGTATACATGTCCA | 0  | 14  | RDR2-sensitive |
| AGCGGCACTGGAGTTTGGAAAGGC  | 0  | 11  | RDR2-sensitive |
| AGCGGCAGAACCATGGAGTGTGCA  | 0  | 15  | RDR2-sensitive |
| AGCGGCAGAGCTCATGATCGTCGA  | 2  | 88  | RDR2-sensitive |
| AGCGGCAGAGCTCATGATTGTCGA  | 1  | 123 | RDR2-sensitive |
| AGCGGCAGAGCTTATGATCGTCGA  | 0  | 28  | RDR2-sensitive |
| AGCGGCAGCAGAACCATCGCGGGC  | 0  | 12  | RDR2-sensitive |
| AGCGGCCTATTCAGACGGACACCT  | 0  | 23  | RDR2-sensitive |
| AGCGGCCTGAAGTAGAGATGTCAA  | 0  | 10  | RDR2-sensitive |
| AGCGGCGACGTAGATCAAGAGGGC  | 2  | 18  | RDR2-sensitive |
| AGCGGCGATATCCTGGGTGGCACC  | 26 | 4   | RDR2-resistant |
| AGCGGCGCGGAATCCGGACGTCCG  | 0  | 90  | RDR2-sensitive |
| AGCGGCGGGACGTGGATGGTGTGG  | 32 | 0   | RDR2-resistant |
| AGCGGCTCTGGCGACGTCTGTAAA  | 0  | 17  | RDR2-sensitive |
| AGCGGCTCTGTTTTTTGTTGGTT   | 3  | 26  | RDR2-sensitive |
| AGCGGCTGAAGCAGAGACTCTAAA  | 0  | 12  | RDR2-sensitive |
| AGCGGCTGCAGCGAAGACTTCGAG  | 0  | 15  | RDR2-sensitive |
| AGCGGCTGCAGCGAAGGCCTCGAG  | 0  | 11  | RDR2-sensitive |
| AGCGGCTGCAGCGAAGGCTTCGAA  | 1  | 12  | RDR2-sensitive |
| AGCGGCTGCTCTGCATACGTTGAG  | 0  | 32  | RDR2-sensitive |
| AGCGGCTGGTAGGCGGGGTACAG   | 0  | 19  | RDR2-sensitive |
| AGCGGCTGGTGATCGAACGGTTGA  | 0  | 11  | RDR2-sensitive |
| AGCGGCTTCAATATGATCGTTGCA  | 0  | 20  | RDR2-sensitive |
| AGCGGGAAGCGTAGGACAAGGCCT  | 0  | 9   | RDR2-sensitive |
| AGCGGGACGAGCATCAGCTGACGC  | 1  | 17  | RDR2-sensitive |
| AGCGGGAGACTGGTGAGCAACGGC  | 1  | 27  | RDR2-sensitive |
| AGCGGGATCGATCGGAGAAGACGC  | 0  | 11  | RDR2-sensitive |
| AGCGGGATGAGAACAGAGTGGCTC  | 0  | 13  | RDR2-sensitive |
| AGCGGGATGGGAACAGAGCGGCTC  | 0  | 15  | RDR2-sensitive |
| AGCGGGATGGGAACGGAACGGCTC  | 0  | 9   | RDR2-sensitive |
| AGCGGGATGGGAACGGAGCGGCTC  | 2  | 72  | RDR2-sensitive |
| AGCGGGATGGGAACGGAGCGGCTT  | 0  | 9   | RDR2-sensitive |

|                           |     |    |                |
|---------------------------|-----|----|----------------|
| AGCGGGATTGGAACGGAGCGGCTC  | 9   | 75 | RDR2-sensitive |
| AGCGGGATTGGAACGGAGCGGCTT  | 0   | 15 | RDR2-sensitive |
| AGCGGGCAAGAAGAAGGAGCACAT  | 0   | 10 | RDR2-sensitive |
| AGCGGGCACAACGCTAGGACGAGC  | 0   | 13 | RDR2-sensitive |
| AGCGGGCAGAACCGTGCACCAGAT  | 0   | 9  | RDR2-sensitive |
| AGCGGGCAGAACCGTGCGCTAGAT  | 0   | 12 | RDR2-sensitive |
| AGCGGGCAGGGACACCCTTCGCAG  | 0   | 12 | RDR2-sensitive |
| AGCGGGCAGTATAGTGCATCTTGC  | 0   | 14 | RDR2-sensitive |
| AGCGGGCGGGAGCGACGAAGACGT  | 0   | 20 | RDR2-sensitive |
| AGCGGGCGTATTTTTTCTTCGCGG  | 0   | 13 | RDR2-sensitive |
| AGCGGGCTGCAGGCAGAACCGTGC  | 0   | 45 | RDR2-sensitive |
| AGCGGGCTGGACAGCGGCTGGGAG  | 779 | 68 | RDR2-resistant |
| AGCGGGCTGGACAGCGGCTGGGGG  | 20  | 0  | RDR2-resistant |
| AGCGGGCTGGGAACAGAGCGGCTC  | 0   | 10 | RDR2-sensitive |
| AGCGGGCTGGGAACGAAGCGGCTC  | 0   | 10 | RDR2-sensitive |
| AGCGGGCTGGGAACGGAGCGGCTC  | 0   | 17 | RDR2-sensitive |
| AGCGGGCTGGGAACGGAGCGGCTT  | 0   | 10 | RDR2-sensitive |
| AGCGGGCTTGGGTCGGGCTAGCAC  | 0   | 16 | RDR2-sensitive |
| AGCGGGGAAGGACAACAGACGCAT  | 0   | 16 | RDR2-sensitive |
| AGCGGGGCAGTAGGAGCGACGTCT  | 0   | 10 | RDR2-sensitive |
| AGCGGGTATGGGGCAACAGAGAAC  | 3   | 47 | RDR2-sensitive |
| AGCGGGTCGGGTTGTAGTCGGGTA  | 2   | 21 | RDR2-sensitive |
| AGCGGGTCGGGTTGTATTCGGATA  | 0   | 12 | RDR2-sensitive |
| AGCGGGTCGGTCCGGCAGACACAC  | 0   | 16 | RDR2-sensitive |
| AGCGGGTCTAAACGGGCATAGCAC  | 0   | 9  | RDR2-sensitive |
| AGCGGGTTCAACGGATGACGACAT  | 0   | 10 | RDR2-sensitive |
| AGCGGGTTGAGAACGAAGCGGCTC  | 0   | 11 | RDR2-sensitive |
| AGCGGTAAGCATTITTAGTTGGTCA | 40  | 4  | RDR2-resistant |
| AGCGGTACCATCCTCTCTGGTCGT  | 0   | 14 | RDR2-sensitive |
| AGCGGTACCCTCGGATTCGGCAGA  | 0   | 59 | RDR2-sensitive |
| AGCGGTACTTCGGACAGACGCGAA  | 0   | 20 | RDR2-sensitive |
| AGCGGTAGGGGTGGAGGGCGTTGG  | 30  | 0  | RDR2-resistant |
| AGCGGTATGGGAACAGGGGCGGAG  | 15  | 0  | RDR2-resistant |
| AGCGGTCAGACGGTGGAGACAGAC  | 0   | 36 | RDR2-sensitive |
| AGCGGTCATTGTTGGAGACAGCCT  | 0   | 27 | RDR2-sensitive |
| AGCGGTCCGCTACGAAGGGGGCAC  | 0   | 15 | RDR2-sensitive |
| AGCGGTGAAAACGGGCTATGCGG   | 0   | 20 | RDR2-sensitive |
| AGCGGTGCACTCCGGTAGCGGCTC  | 1   | 36 | RDR2-sensitive |
| AGCGGTGCGCGGCAACGAGGGCGT  | 0   | 18 | RDR2-sensitive |
| AGCGGTCTATAGCTGACGGTCGTT  | 0   | 16 | RDR2-sensitive |
| AGCGGTCTGGGTAGCGGATGCTGC  | 0   | 31 | RDR2-sensitive |
| AGCGGTGCTGCAGAGCGGTATCTG  | 0   | 10 | RDR2-sensitive |
| AGCGGTGGACGGTCACGGACAGAC  | 0   | 11 | RDR2-sensitive |
| AGCGGTGGTATCTGACACGAGCTG  | 0   | 10 | RDR2-sensitive |
| AGCGGTGTAGGAGGCATTCAACCG  | 0   | 10 | RDR2-sensitive |
| AGCGGTTAAGGACTCACGCGGCGC  | 0   | 10 | RDR2-sensitive |
| AGCGGTTACTGTATGCGGCTTGTC  | 0   | 19 | RDR2-sensitive |
| AGCGGTTCACTGAAAGACGACGC   | 0   | 24 | RDR2-sensitive |
| AGCGGTTCTGTTTTTGTGGTT     | 0   | 10 | RDR2-sensitive |

|                           |    |     |                |
|---------------------------|----|-----|----------------|
| AGCGGTTGAGTCCTTGCTGACGTC  | 1  | 13  | RDR2-sensitive |
| AGCGGTTGGGATTCCTGAAGACGC  | 0  | 19  | RDR2-sensitive |
| AGCGGTTGGGATTCCTGGAGACGC  | 1  | 101 | RDR2-sensitive |
| AGCGGTTTTTAGGCTGATACGGTA  | 0  | 19  | RDR2-sensitive |
| AGCGGTTTTGTAGGCTAAACGGT   | 0  | 17  | RDR2-sensitive |
| AGCGTACACTGTGCTGACACTCGG  | 0  | 14  | RDR2-sensitive |
| AGCGTACGCCGGCATGCAGGCTCA  | 0  | 9   | RDR2-sensitive |
| AGCGTACTGGAGCTGCCGCTGGAA  | 0  | 9   | RDR2-sensitive |
| AGCGTACTGGTTGAACGGATGCAA  | 0  | 13  | RDR2-sensitive |
| AGCGTAGACTGTGTACAGCGCGGG  | 0  | 13  | RDR2-sensitive |
| AGCGTAGAGCACCGTTTGATCCTC  | 0  | 12  | RDR2-sensitive |
| AGCGTAGATACTCAGGAACGGCAA  | 1  | 119 | RDR2-sensitive |
| AGCGTAGATGCTCAGGAACGGCAA  | 2  | 31  | RDR2-sensitive |
| AGCGTAGATGCTCAGGAACGGCGA  | 0  | 13  | RDR2-sensitive |
| AGCGTAGATGGTGGACTGTGCCGC  | 0  | 9   | RDR2-sensitive |
| AGCGTAGCGGTATGGTAGGAAGGA  | 0  | 13  | RDR2-sensitive |
| AGCGTAGCTGTGGAGTAGTAGGCT  | 1  | 37  | RDR2-sensitive |
| AGCGTAGGACTCTGCCGAGTGCGG  | 0  | 13  | RDR2-sensitive |
| AGCGTAGGACTTTACCGAGTGCGG  | 0  | 12  | RDR2-sensitive |
| AGCGTAGGACTTTGCCGAGTGCGG  | 1  | 31  | RDR2-sensitive |
| AGCGTAGGCTCGATGACGTGACGG  | 0  | 21  | RDR2-sensitive |
| AGCGTAGGGCTGCAGGAACGGCAG  | 0  | 39  | RDR2-sensitive |
| AGCGTAGTCTGTATGTGCCGAGCAC | 0  | 15  | RDR2-sensitive |
| AGCGTAGTGACTGAGTCGTTGGTT  | 0  | 17  | RDR2-sensitive |
| AGCGTATCGCGCTGTCTGATGGGA  | 0  | 13  | RDR2-sensitive |
| AGCGTATGGGGCACTGTAGGAGGC  | 0  | 9   | RDR2-sensitive |
| AGCGTCAACGATCGGCAGGGCGAC  | 1  | 15  | RDR2-sensitive |
| AGCGTCCTTGAGTACCTCGTCGCC  | 15 | 0   | RDR2-resistant |
| AGCGTCGATCTCTGACGTGGCGTC  | 0  | 18  | RDR2-sensitive |
| AGCGTCTGTCTCTGGCGGCTCCAC  | 0  | 13  | RDR2-sensitive |
| AGCGTGACCGACGAGCTAAGGCTG  | 1  | 23  | RDR2-sensitive |
| AGCGTGACTCAAGCAGGACCCGTG  | 0  | 18  | RDR2-sensitive |
| AGCGTGACTGCATGAGGAGGGTGA  | 0  | 10  | RDR2-sensitive |
| AGCGTGACTGTGAGAGCGGGATGG  | 5  | 135 | RDR2-sensitive |
| AGCGTGACCGTTGAACGCATGGC   | 0  | 11  | RDR2-sensitive |
| AGCGTGCGAGAGGGACGAAGACGA  | 0  | 11  | RDR2-sensitive |
| AGCGTGCGCGCCTGGTCGGTACGG  | 0  | 17  | RDR2-sensitive |
| AGCGTGCGGGAGCGACGAAGACGT  | 0  | 14  | RDR2-sensitive |
| AGCGTGCGGGAGGGACGAAACCGG  | 0  | 11  | RDR2-sensitive |
| AGCGTGGCTGGACGAAGCGTCATG  | 0  | 20  | RDR2-sensitive |
| AGCGTGTCGGGCTGCTGTGCGGAG  | 0  | 13  | RDR2-sensitive |
| AGCGTTATTTCCGTCCGTTGGCCG  | 0  | 10  | RDR2-sensitive |
| AGCGTTCATGTAGAGTAGACGAC   | 0  | 13  | RDR2-sensitive |
| AGCGTTCGTGGGACGGGGACGGAG  | 0  | 10  | RDR2-sensitive |
| AGCGTTCGTTTGGTTGGCCGTATA  | 0  | 17  | RDR2-sensitive |
| AGCGTTCGCTGAGATCTCGGCG    | 0  | 9   | RDR2-sensitive |
| AGCGTTCGCTGCATCTCTCAGGC   | 0  | 25  | RDR2-sensitive |
| AGCGTTGGACCAAGTCGACGGCTG  | 0  | 10  | RDR2-sensitive |
| AGCGTTGGGCGATGCACCGTGCAT  | 0  | 9   | RDR2-sensitive |

|                           |    |     |                |
|---------------------------|----|-----|----------------|
| AGCGTTGTACGGATGCAGTGCGCT  | 0  | 16  | RDR2-sensitive |
| AGCGTTGTTGGACGCCTCGCGGAC  | 0  | 10  | RDR2-sensitive |
| AGCGTTGTTGGACGCCTTGC GGAC | 0  | 9   | RDR2-sensitive |
| AGCTAAATTTTAAAGATCGTTGGT  | 0  | 17  | RDR2-sensitive |
| AGCTAACGTGGCTGAACGCTGGAC  | 1  | 14  | RDR2-sensitive |
| AGCTAAGAGACTGTATAAGGGCAT  | 0  | 10  | RDR2-sensitive |
| AGCTAATTCAAATCGGACCGGCAC  | 0  | 11  | RDR2-sensitive |
| AGCTAATTCATGTCGGGCGCGGCAC | 0  | 125 | RDR2-sensitive |
| AGCTAATTCGGACCGCGCAGTCAC  | 0  | 18  | RDR2-sensitive |
| AGCTAATTCGGGCTGGACCGGTAC  | 0  | 20  | RDR2-sensitive |
| AGCTACAGGGACTGTCCGGTGCGC  | 0  | 10  | RDR2-sensitive |
| AGCTACAGTCGGCGACACCGTCCT  | 1  | 17  | RDR2-sensitive |
| AGCTACAGTCGGCGACATCGTCCT  | 2  | 16  | RDR2-sensitive |
| AGCTACAGTGA CTGTCCGGTGGTG | 0  | 12  | RDR2-sensitive |
| AGCTACCATCGTAGTTGATCACGG  | 0  | 9   | RDR2-sensitive |
| AGCTACCATGCAGACCGTCAGACA  | 0  | 24  | RDR2-sensitive |
| AGCTACGGACGGCTGCTGACGACG  | 0  | 9   | RDR2-sensitive |
| AGCTACGTCAAGACAGAGGGCATC  | 0  | 9   | RDR2-sensitive |
| AGCTACTCTTTGGACGTTGTGAA   | 14 | 0   | RDR2-resistant |
| AGCTACTGAGTACTGATCGGTCGG  | 0  | 9   | RDR2-sensitive |
| AGCTACTGTGCTACTGGGCGGACA  | 0  | 26  | RDR2-sensitive |
| AGCTACTGTGGAAACCGGCGTCGC  | 0  | 12  | RDR2-sensitive |
| AGCTAGACGTGAACTGTGCAGGGG  | 0  | 9   | RDR2-sensitive |
| AGCTAGAGGACGGTTTTCGATGGAC | 0  | 11  | RDR2-sensitive |
| AGCTAGATCGAACGCGTGTGGCAC  | 0  | 39  | RDR2-sensitive |
| AGCTAGATGGCAGAACGGCAGAAC  | 1  | 39  | RDR2-sensitive |
| AGCTAGCAACCGGCGCCTCTGCTC  | 33 | 3   | RDR2-resistant |
| AGCTAGCCGTTGGACTCATGGCAC  | 8  | 89  | RDR2-sensitive |
| AGCTAGCCGTTGGACTCATGGCGC  | 2  | 52  | RDR2-sensitive |
| AGCTAGCCGTTGGACTGATGGCAC  | 0  | 107 | RDR2-sensitive |
| AGCTAGCCGTTGGGCTGATGGCAC  | 1  | 19  | RDR2-sensitive |
| AGCTAGCCGTTGGTCTGATGGCAC  | 0  | 17  | RDR2-sensitive |
| AGCTAGCTCGAAGGCTGACGAGGC  | 0  | 9   | RDR2-sensitive |
| AGCTAGCTCTGACAGTAGACGTTG  | 0  | 28  | RDR2-sensitive |
| AGCTAGGAAGCCTGGGAACGACGG  | 0  | 14  | RDR2-sensitive |
| AGCTAGGACATAACCGCGCGGCAC  | 0  | 10  | RDR2-sensitive |
| AGCTAGGACTACGTAGAAGAGGAA  | 0  | 15  | RDR2-sensitive |
| AGCTAGGATTGAGACGTCGGATAA  | 0  | 14  | RDR2-sensitive |
| AGCTAGGCTGTAGGGGGCACCCCTA | 0  | 24  | RDR2-sensitive |
| AGCTAGGGGTAGGGTAATGATGGC  | 3  | 19  | RDR2-sensitive |
| AGCTAGTCCACTGTTTCGAGCATA  | 0  | 11  | RDR2-sensitive |
| AGCTAGTCGTTGGGCTGATGGCAC  | 0  | 10  | RDR2-sensitive |
| AGCTAGTGCATGATTGTACCGGGC  | 0  | 10  | RDR2-sensitive |
| AGCTATAGACGGCTGTTGACGGTC  | 0  | 13  | RDR2-sensitive |
| AGCTATCCCGTCGGAAGTTTGGCT  | 1  | 14  | RDR2-sensitive |
| AGCTATCGGTACGTGTAGAGATGG  | 0  | 10  | RDR2-sensitive |
| AGCTATCGGTTCCGGACTCGGCC   | 0  | 16  | RDR2-sensitive |
| AGCTATCGTAGCAACGCACGGACA  | 0  | 24  | RDR2-sensitive |
| AGCTATCTGACTCTGTAAATTGGC  | 0  | 11  | RDR2-sensitive |

|                           |    |    |                |
|---------------------------|----|----|----------------|
| AGCTATCTGAGATCGTTAATGGCA  | 0  | 15 | RDR2-sensitive |
| AGCTATCTGGACCCGTCGGACAGC  | 0  | 9  | RDR2-sensitive |
| AGCTATCTGGTCGCGGACTCGGCC  | 8  | 56 | RDR2-sensitive |
| AGCTATCTGGTTGCGGACTCGGCC  | 0  | 13 | RDR2-sensitive |
| AGCTATCTGTTCGCGGACTCGGCC  | 12 | 77 | RDR2-sensitive |
| AGCTATCTGTTCGTAGACTCGGCC  | 0  | 10 | RDR2-sensitive |
| AGCTATCTGTTCGTGGACTCGGCC  | 0  | 9  | RDR2-sensitive |
| AGCTATGATGCGGGCTATGAGGCT  | 0  | 17 | RDR2-sensitive |
| AGCTATTCGGACTACTGCAGATGT  | 0  | 9  | RDR2-sensitive |
| AGCTATTCGGACTGTTAGAGGTGT  | 0  | 12 | RDR2-sensitive |
| AGCTATTGGGCTACGCTCTCGGAC  | 0  | 13 | RDR2-sensitive |
| AGCTATTGTCGACTGCTGACGGTG  | 0  | 15 | RDR2-sensitive |
| AGCTATTTGGGCACGTCGGGCGGC  | 0  | 10 | RDR2-sensitive |
| AGCTATTTTAGCTGCTCCGTTGGA  | 1  | 12 | RDR2-sensitive |
| AGCTATTTTCGTCGGTCGGCCAC   | 1  | 20 | RDR2-sensitive |
| AGCTCAAGCGGTCTGTCTGGTCGTC | 16 | 0  | RDR2-resistant |
| AGCTCAATCAAGTCGTCGTTGTAC  | 27 | 2  | RDR2-resistant |
| AGCTCACGTCCCAGGATCGGCTC   | 91 | 3  | RDR2-resistant |
| AGCTCACTGTAAGATAAAAGGCAC  | 0  | 11 | RDR2-sensitive |
| AGCTCAGATTATTTGGACTCGGCT  | 7  | 34 | RDR2-sensitive |
| AGCTCAGCCGATACGGGTAGGAT   | 0  | 12 | RDR2-sensitive |
| AGCTCAGCCTGATCCGGATAGCGT  | 1  | 31 | RDR2-sensitive |
| AGCTCAGCGAACTGTACATCGGCA  | 0  | 10 | RDR2-sensitive |
| AGCTCAGCGGACAGAGGAGAAGCA  | 0  | 10 | RDR2-sensitive |
| AGCTCAGGACCTTGACGACGGGCA  | 0  | 15 | RDR2-sensitive |
| AGCTCAGGTTGCATGGACAGACGC  | 0  | 20 | RDR2-sensitive |
| AGCTCATCCGGACCAGGCCGGCAC  | 0  | 21 | RDR2-sensitive |
| AGCTCATCGGTTTCGTAGACGTGGC | 0  | 9  | RDR2-sensitive |
| AGCTCATTGGACTGGCCCGGGCAC  | 0  | 46 | RDR2-sensitive |
| AGCTCCAACAGCCAGGACGTCCGT  | 1  | 30 | RDR2-sensitive |
| AGCTCCACCGGACGCCGAAGACGC  | 0  | 24 | RDR2-sensitive |
| AGCTCCAGCCAGGAGATCGATCGG  | 0  | 25 | RDR2-sensitive |
| AGCTCCCCGGATGGTAGCTTCGGC  | 1  | 18 | RDR2-sensitive |
| AGCTCCCTGGATCGTAGCTTCGGC  | 0  | 11 | RDR2-sensitive |
| AGCTCCCTGGATCGTAGCTTCGGT  | 0  | 11 | RDR2-sensitive |
| AGCTCCCTGGATTGTAGCTTCGGC  | 0  | 24 | RDR2-sensitive |
| AGCTCCCTGGATTGTAGCTTCGGT  | 1  | 48 | RDR2-sensitive |
| AGCTCCGGACATATAGAGTCGGTA  | 0  | 17 | RDR2-sensitive |
| AGCTCCGTCCGGCTACGTATCACCA | 18 | 0  | RDR2-resistant |
| AGCTCCTGCACCAGGTCGCGGACC  | 5  | 46 | RDR2-sensitive |
| AGCTCCTGCTTCCAGGTCGCGGAC  | 0  | 25 | RDR2-sensitive |
| AGCTCCTGTGGTTGCATCGTCTGG  | 0  | 10 | RDR2-sensitive |
| AGCTCCTTGGACTGTCTTGAGGTT  | 1  | 23 | RDR2-sensitive |
| AGCTCGAAGGTGGATATGAGACAA  | 0  | 14 | RDR2-sensitive |
| AGCTCGAAGGTGGATATGAGACAT  | 0  | 14 | RDR2-sensitive |
| AGCTCGACGAACTGTACATCGGCA  | 4  | 34 | RDR2-sensitive |
| AGCTCGACGAGAACTGTCAACGGC  | 0  | 10 | RDR2-sensitive |
| AGCTCGACTCAGACTCAACTCGGC  | 0  | 16 | RDR2-sensitive |
| AGCTCGACTCGGCTCGGACCGGCT  | 0  | 33 | RDR2-sensitive |

|                          |    |     |                |
|--------------------------|----|-----|----------------|
| AGCTCGACTCGGCTTGGATCGGCT | 0  | 20  | RDR2-sensitive |
| AGCTCGACTCGGTTTAGAACGGCT | 6  | 65  | RDR2-sensitive |
| AGCTCGACTGAGGGTTGAAGACGT | 1  | 12  | RDR2-sensitive |
| AGCTCGAGCTCGACGGACCGGCTT | 0  | 19  | RDR2-sensitive |
| AGCTCGAGCTCGGAGCAACTCGGC | 66 | 1   | RDR2-resistant |
| AGCTCGCTAGGTGACTGAGCCGGT | 0  | 10  | RDR2-sensitive |
| AGCTCGGACAAGCTACAGGTGCAT | 0  | 9   | RDR2-sensitive |
| AGCTCGGATCGGTTTGTAGCGGCT | 1  | 24  | RDR2-sensitive |
| AGCTCGGCACTACAGATCACGGTG | 0  | 50  | RDR2-sensitive |
| AGCTCGGCGAAGTGTACATCGGCA | 1  | 14  | RDR2-sensitive |
| AGCTCGGCGACTGTACATCGGCAA | 0  | 9   | RDR2-sensitive |
| AGCTCGGCTCGGATCGGATCGGCT | 0  | 9   | RDR2-sensitive |
| AGCTCGGCTCGGCTCGACTCGGCT | 3  | 94  | RDR2-sensitive |
| AGCTCGGCTCGGCTCGGATCGGCT | 7  | 150 | RDR2-sensitive |
| AGCTCGGCTCGGCTTGGATCGGTT | 1  | 15  | RDR2-sensitive |
| AGCTCGGCTGTATATTGGGTGACA | 0  | 23  | RDR2-sensitive |
| AGCTCGGCTTGACTCGGACCGGCT | 0  | 21  | RDR2-sensitive |
| AGCTCGGCTTGGGCTCGTTCGGAG | 0  | 10  | RDR2-sensitive |
| AGCTCGGGAGACGGATTGTAACGG | 0  | 9   | RDR2-sensitive |
| AGCTCGGGATACGGATTGTAACGG | 0  | 15  | RDR2-sensitive |
| AGCTCGGGGTAGGGTGATGATGGC | 8  | 36  | RDR2-sensitive |
| AGCTCGGTACCACGTCCGGCTCAC | 0  | 9   | RDR2-sensitive |
| AGCTCGTCAGAACTACAAGCCGAG | 0  | 14  | RDR2-sensitive |
| AGCTCGTCTCGACTTGAATCGGCT | 0  | 15  | RDR2-sensitive |
| AGCTCGTCTGTGGACTGCGGCTGC | 0  | 14  | RDR2-sensitive |
| AGCTCGTGGACGACAGCGCGGCAG | 0  | 22  | RDR2-sensitive |
| AGCTCGTTTCTGTGGAGCCAGGCT | 1  | 41  | RDR2-sensitive |
| AGCTCTACCCCAGGTTGTGGACTG | 0  | 12  | RDR2-sensitive |
| AGCTCTACTTAGATCGTTCTCATC | 49 | 4   | RDR2-resistant |
| AGCTCTAGACATGTCAGACTGCAC | 0  | 18  | RDR2-sensitive |
| AGCTCTAGATCCTGATCCTCGTGA | 4  | 32  | RDR2-sensitive |
| AGCTCTAGTATTTGTCAATCGGTT | 15 | 0   | RDR2-resistant |
| AGCTCTCCGGATGGTAGCTTCGGC | 0  | 20  | RDR2-sensitive |
| AGCTCTCGCTCGGGTAGACGGTTT | 0  | 9   | RDR2-sensitive |
| AGCTCTCGGGAACCTGAAGGCGCT | 4  | 18  | RDR2-sensitive |
| AGCTCTCGTGTTTGTGTCGTCTGG | 0  | 11  | RDR2-sensitive |
| AGCTCTCTGTATCATGGACGGT   | 1  | 12  | RDR2-sensitive |
| AGCTCTCTGCAGGTACGACGGACG | 0  | 9   | RDR2-sensitive |
| AGCTCTCTGCGGCAGTGCGGACGG | 0  | 18  | RDR2-sensitive |
| AGCTCTGAATGTAGCGGTGGCGTC | 0  | 11  | RDR2-sensitive |
| AGCTCTGACAGTAGACGTTGCAGA | 0  | 13  | RDR2-sensitive |
| AGCTCTGACGCAGGCACAACACAC | 0  | 14  | RDR2-sensitive |
| AGCTCTGACGTGGCCGCAACGGCT | 0  | 14  | RDR2-sensitive |
| AGCTCTGCGGACGGTGATTTAGA  | 0  | 27  | RDR2-sensitive |
| AGCTCTGGACATGGCAGACTGCAC | 0  | 38  | RDR2-sensitive |
| AGCTCTGGACATGTCAGACTGCAC | 2  | 104 | RDR2-sensitive |
| AGCTCTGGGACGGCCGCTGACGGC | 2  | 22  | RDR2-sensitive |
| AGCTCTGGTTAAACTCTTGATGGA | 0  | 9   | RDR2-sensitive |
| AGCTCTGTAGAGGAAGGCCAACAT | 0  | 9   | RDR2-sensitive |

|                           |    |     |                |
|---------------------------|----|-----|----------------|
| AGCTCTGTAGGCGCTACGCGACAA  | 0  | 17  | RDR2-sensitive |
| AGCTCTGTGGAATGCACGTCAATC  | 26 | 3   | RDR2-resistant |
| AGCTCTGTGTTTGATTGTCTGCAT  | 1  | 38  | RDR2-sensitive |
| AGCTCTTCAAGTAGATTATTTGTT  | 59 | 0   | RDR2-resistant |
| AGCTCTTCGGATCTGGCATATTTT  | 28 | 0   | RDR2-resistant |
| AGCTCTTCGGATTTGGCGTATTTT  | 0  | 9   | RDR2-sensitive |
| AGCTCTTGTAGGTGTAGTCGTCTT  | 27 | 2   | RDR2-resistant |
| AGCTCTTTCGGTTGTAGCTTCGGC  | 4  | 64  | RDR2-sensitive |
| AGCTCTTTGGATCGTAGCTTCGGC  | 0  | 9   | RDR2-sensitive |
| AGCTGAACGTATGGATGGCTGTGC  | 0  | 100 | RDR2-sensitive |
| AGCTGAACTGATAAGCTGCTGCAG  | 6  | 62  | RDR2-sensitive |
| AGCTGAAGATCTGCTACTGTATAT  | 17 | 1   | RDR2-resistant |
| AGCTGAAGGAGAAGGGTCACTCGG  | 0  | 20  | RDR2-sensitive |
| AGCTGAAGGATGGACGATCACGGT  | 43 | 0   | RDR2-resistant |
| AGCTGAATTATGGAGACTCAGGCT  | 0  | 9   | RDR2-sensitive |
| AGCTGACATCCTAGCTCGGTTTCGT | 7  | 43  | RDR2-sensitive |
| AGCTGACATGAGGCAGACTGACAC  | 1  | 17  | RDR2-sensitive |
| AGCTGACCATGAACCGAGCGGAGAC | 0  | 18  | RDR2-sensitive |
| AGCTGACGACGTACTGCAGGCTGC  | 0  | 9   | RDR2-sensitive |
| AGCTGACGAGAGGAGATGGACAAT  | 0  | 9   | RDR2-sensitive |
| AGCTGACGCCTACGTGGATCTGAT  | 0  | 10  | RDR2-sensitive |
| AGCTGACGGACTAGAGCAGTCGGG  | 0  | 14  | RDR2-sensitive |
| AGCTGACGGCCGTTAGTCTTTGCC  | 11 | 65  | RDR2-sensitive |
| AGCTGACGGCCGTTATCTTTGCTG  | 0  | 12  | RDR2-sensitive |
| AGCTGACGGCTGTCAGTCTTTGCC  | 0  | 12  | RDR2-sensitive |
| AGCTGACGGGCAGGATGAAGCAA   | 0  | 21  | RDR2-sensitive |
| AGCTGACGGGCAATGAAGAACAA   | 0  | 12  | RDR2-sensitive |
| AGCTGACGTGGACAAGAGAGAGGT  | 0  | 12  | RDR2-sensitive |
| AGCTGACTCTGGCGAAATGACTGC  | 0  | 10  | RDR2-sensitive |
| AGCTGACTGAAAAGCTGAGCGTTT  | 0  | 9   | RDR2-sensitive |
| AGCTGACTGAAAAGCTGAGGCGTT  | 0  | 10  | RDR2-sensitive |
| AGCTGACTGAGAGACGCCACCTAG  | 0  | 31  | RDR2-sensitive |
| AGCTGACTGCATGCGCTCGCGGCT  | 1  | 38  | RDR2-sensitive |
| AGCTGACTGGAAGACGCCACCTAG  | 0  | 13  | RDR2-sensitive |
| AGCTGACTGGAAGACGCCATCTAG  | 0  | 9   | RDR2-sensitive |
| AGCTGACTGGAAGATGACACCTAG  | 0  | 21  | RDR2-sensitive |
| AGCTGACTGGGAGACGCCACCTAG  | 1  | 26  | RDR2-sensitive |
| AGCTGACTGGGAGACGCCACTTAG  | 0  | 10  | RDR2-sensitive |
| AGCTGACTGTGAGACGACACCAAG  | 0  | 11  | RDR2-sensitive |
| AGCTGACTGTGCAGAGAAGCTGGT  | 0  | 9   | RDR2-sensitive |
| AGCTGACTGTGGAGAAAAGTTGGC  | 0  | 9   | RDR2-sensitive |
| AGCTGACTGTGGGGAAAAGCTGGC  | 0  | 11  | RDR2-sensitive |
| AGCTGACTGTGGGGAAAAGGTGGC  | 0  | 18  | RDR2-sensitive |
| AGCTGACTGTGGGGAGAAGCTGGT  | 1  | 119 | RDR2-sensitive |
| AGCTGAGAATTAGGCGTCTTGAGG  | 0  | 10  | RDR2-sensitive |
| AGCTGAGACTGGTCTGATGGCGTC  | 0  | 25  | RDR2-sensitive |
| AGCTGAGAGCAGACTACCTGGCAC  | 0  | 10  | RDR2-sensitive |
| AGCTGAGCGTTTGGCAGTCCGCAG  | 0  | 31  | RDR2-sensitive |
| AGCTGAGGCGGCTTGTAGGACGGA  | 1  | 20  | RDR2-sensitive |

|                           |    |    |                |
|---------------------------|----|----|----------------|
| AGCTGATAGGAAGAGGTGGACAAT  | 0  | 23 | RDR2-sensitive |
| AGCTGATAGGACTAGGCACACGGA  | 0  | 9  | RDR2-sensitive |
| AGCTGATCGTTGGCTAGACGTGCG  | 0  | 16 | RDR2-sensitive |
| AGCTGATGTGGCTTAGCTCGGCGC  | 1  | 12 | RDR2-sensitive |
| AGCTGATGTGGGACGCCAGGCATT  | 0  | 23 | RDR2-sensitive |
| AGCTGATTCCGGTAGTAGAGGGCC  | 0  | 9  | RDR2-sensitive |
| AGCTGCAACAGTGTCCGGCTTGCAG | 0  | 10 | RDR2-sensitive |
| AGCTGCACGGTACTCCAAGTATAA  | 2  | 21 | RDR2-sensitive |
| AGCTGCAGAACTGCTTTCCAACGG  | 0  | 21 | RDR2-sensitive |
| AGCTGCAGACTGGAACGATGTCCGG | 0  | 23 | RDR2-sensitive |
| AGCTGCAGAGACTGATGGGCGCAA  | 0  | 50 | RDR2-sensitive |
| AGCTGCAGCAGTCCGAACGGCTTT  | 1  | 34 | RDR2-sensitive |
| AGCTGCCAGAAGCCGAAACAAACA  | 0  | 18 | RDR2-sensitive |
| AGCTGCCAGGGCTGACTCATGGAC  | 0  | 9  | RDR2-sensitive |
| AGCTGCCATCGAAGGACGGGCGAC  | 0  | 9  | RDR2-sensitive |
| AGCTGCCTTGTAGAAGCTAGGCC   | 0  | 26 | RDR2-sensitive |
| AGCTGCGTCAGAATGTGTGGCATC  | 1  | 17 | RDR2-sensitive |
| AGCTGCGTGGGACTTGCCGATAAC  | 0  | 17 | RDR2-sensitive |
| AGCTGCGTTGAGACGGACAATCAC  | 0  | 11 | RDR2-sensitive |
| AGCTGCTAGAGCCGAGGGAGACGT  | 0  | 29 | RDR2-sensitive |
| AGCTGCTCCGTTGGATACGACGAA  | 0  | 10 | RDR2-sensitive |
| AGCTGCTCGGAGGTAGTCGGCGCC  | 1  | 15 | RDR2-sensitive |
| AGCTGCTCTGTTGGAAGAAGGATT  | 0  | 17 | RDR2-sensitive |
| AGCTGCTGACGGACCAGAGGACGA  | 0  | 18 | RDR2-sensitive |
| AGCTGCTGGCCATGGTGAGGATGA  | 0  | 9  | RDR2-sensitive |
| AGCTGCTGTAGATCGGTTCGGTGTA | 2  | 15 | RDR2-sensitive |
| AGCTGCTTGTTCGGACGTCGGCCAC | 0  | 10 | RDR2-sensitive |
| AGCTGCTTTGTGCGGATCTGTTGG  | 1  | 33 | RDR2-sensitive |
| AGCTGGAACGGAGCGGCTCTGTTT  | 0  | 10 | RDR2-sensitive |
| AGCTGGACAGCAGGATATGATGCT  | 0  | 9  | RDR2-sensitive |
| AGCTGGACAGTGTGATGGCGTCGT  | 0  | 9  | RDR2-sensitive |
| AGCTGGACGCAGGGGAGATGGACC  | 0  | 11 | RDR2-sensitive |
| AGCTGGACGGCCTGGTACATGTGT  | 0  | 12 | RDR2-sensitive |
| AGCTGGAGACTGCACAGTCTGCGT  | 0  | 13 | RDR2-sensitive |
| AGCTGGAGATGAACATCGACACAT  | 0  | 20 | RDR2-sensitive |
| AGCTGGAGCAGAGTAGGACGAGGC  | 0  | 18 | RDR2-sensitive |
| AGCTGGATCGTATGGCTGCTGGCT  | 15 | 0  | RDR2-resistant |
| AGCTGGCAGAACGTTGGGTGTCGC  | 0  | 12 | RDR2-sensitive |
| AGCTGGCGAATCTGACTGGCAGTA  | 21 | 0  | RDR2-resistant |
| AGCTGGCTCGGGCTCGGATTGGCT  | 0  | 10 | RDR2-sensitive |
| AGCTGGCTGCGAGCATAAGTTCA   | 0  | 16 | RDR2-sensitive |
| AGCTGGCTGGTAGAGAGGACGCAC  | 0  | 20 | RDR2-sensitive |
| AGCTGGCTGTAGAAAAAGCTGGC   | 0  | 10 | RDR2-sensitive |
| AGCTGGCTGTAGAGAAAAGCTGGC  | 0  | 18 | RDR2-sensitive |
| AGCTGGCTGTAGGGAGAAGCTGGT  | 0  | 34 | RDR2-sensitive |
| AGCTGGCTGTAGTGAGAAGCTGGT  | 0  | 17 | RDR2-sensitive |
| AGCTGGCTGTGAGGAGAAGCTGGT  | 0  | 11 | RDR2-sensitive |
| AGCTGGCTGTGCAGAGAAGCTGGT  | 0  | 19 | RDR2-sensitive |
| AGCTGGCTGTGCAGAGAAGTTGGT  | 0  | 10 | RDR2-sensitive |



|                           |    |     |                |
|---------------------------|----|-----|----------------|
| AGCTGGCTGTGGAGAGAAGCTGGT  | 0  | 17  | RDR2-sensitive |
| AGCTGGCTGTGGGGAAAAGCTGGC  | 0  | 42  | RDR2-sensitive |
| AGCTGGGAAAGGCGATCGTTTCGGC | 0  | 10  | RDR2-sensitive |
| AGCTGGGACAGGCAGGACAAAGAC  | 0  | 17  | RDR2-sensitive |
| AGCTGGGACTGGGAGAGGCAAAGC  | 0  | 24  | RDR2-sensitive |
| AGCTGGGAGGAATGAACAGAGGAT  | 0  | 15  | RDR2-sensitive |
| AGCTGGGCTGAGACACGGCACTAT  | 0  | 10  | RDR2-sensitive |
| AGCTGGGGATGAGCATCGACGCAT  | 0  | 16  | RDR2-sensitive |
| AGCTGGGGGAACGAAGACGGGCCT  | 0  | 9   | RDR2-sensitive |
| AGCTGGGTTCGACGATGTCAGAAGA | 0  | 17  | RDR2-sensitive |
| AGCTGGTGCTCGGCAAATAGCTA   | 43 | 4   | RDR2-resistant |
| AGCTGGTGGTTAGAATCTAGGTGT  | 0  | 13  | RDR2-sensitive |
| AGCTGGTGGTTAGAATTTAGGTGT  | 18 | 75  | RDR2-sensitive |
| AGCTGGTTGGAAACGGAGCGGCTC  | 0  | 9   | RDR2-sensitive |
| AGCTGTAACGTTGGCTCTTGACGG  | 0  | 30  | RDR2-sensitive |
| AGCTGTAAGAAGCTCGTCGTGGAC  | 0  | 11  | RDR2-sensitive |
| AGCTGTACATCACGCTGGTCTAGG  | 0  | 9   | RDR2-sensitive |
| AGCTGTACGGAGGCAGAACGCGGC  | 0  | 22  | RDR2-sensitive |
| AGCTGTACGGGCATCAACGCTATA  | 0  | 13  | RDR2-sensitive |
| AGCTGTACGTGAAGTCGGACACAG  | 0  | 11  | RDR2-sensitive |
| AGCTGTAGACAGCCGCTAACGGAC  | 0  | 12  | RDR2-sensitive |
| AGCTGTAGACGACCACTAACGGCC  | 0  | 10  | RDR2-sensitive |
| AGCTGTAGACGGCCGCTAACGACC  | 3  | 22  | RDR2-sensitive |
| AGCTGTAGACGGCTGCTAACGGCC  | 2  | 23  | RDR2-sensitive |
| AGCTGTAGAGCACTCGGCAAAGAT  | 0  | 15  | RDR2-sensitive |
| AGCTGTAGCGACGGAGAGGAGCAT  | 3  | 16  | RDR2-sensitive |
| AGCTGTAGCTCATAGGCATGTAGC  | 0  | 18  | RDR2-sensitive |
| AGCTGTAGGCATACCCTTTCGCAC  | 0  | 22  | RDR2-sensitive |
| AGCTGTATCTCGACCGAACCCGGC  | 0  | 13  | RDR2-sensitive |
| AGCTGTATGACTACAAGATGGTTG  | 4  | 47  | RDR2-sensitive |
| AGCTGTCAACTAGCACTCGTCGTC  | 0  | 12  | RDR2-sensitive |
| AGCTGTGAGTGTGGGCTAGGCCG   | 0  | 10  | RDR2-sensitive |
| AGCTGTGATTGTGGGCTAGGCCG   | 0  | 15  | RDR2-sensitive |
| AGCTGTGCGGTGGGTTAGTTGGGC  | 3  | 24  | RDR2-sensitive |
| AGCTGTGCGCACTCGGCAAAGAGC  | 0  | 12  | RDR2-sensitive |
| AGCTGTGCTGCAAGCGAGTTGGGC  | 0  | 9   | RDR2-sensitive |
| AGCTGTCTGGATTGTGCCGGCCAA  | 0  | 18  | RDR2-sensitive |
| AGCTGTCTGGATTGTGCCGGTCAA  | 0  | 18  | RDR2-sensitive |
| AGCTGTCTGGGCACGTCGGGCGGC  | 2  | 54  | RDR2-sensitive |
| AGCTGTCTGGGCACGTCGGGCGGG  | 0  | 15  | RDR2-sensitive |
| AGCTGTGACTGTGGCAGATCGGCC  | 0  | 10  | RDR2-sensitive |
| AGCTGTGATGAGGTCAGGACACAT  | 0  | 10  | RDR2-sensitive |
| AGCTGTGCTGGATCTGAATGGCTA  | 2  | 197 | RDR2-sensitive |
| AGCTGTGGACCGTGCCGTCGTCGG  | 0  | 19  | RDR2-sensitive |
| AGCTGTGGACGACTACACTACCTT  | 0  | 11  | RDR2-sensitive |
| AGCTGTGGACGCCTACTTTGCTAT  | 0  | 18  | RDR2-sensitive |
| AGCTGTGGAGCACAACGACGGAGT  | 0  | 16  | RDR2-sensitive |
| AGCTGTGGATGTAGATCTAGCGGC  | 0  | 16  | RDR2-sensitive |
| AGCTGTGGGGCTCACCAAGTCGACC | 0  | 12  | RDR2-sensitive |

|                            |     |     |                |
|----------------------------|-----|-----|----------------|
| AGCTGTGTTACCTCGGCGCCACAG   | 0   | 9   | RDR2-sensitive |
| AGCTG TTCAGACTGCTGCAGGTGT  | 0   | 12  | RDR2-sensitive |
| AGCTG TTCGAACCTGGTTTGGCTG  | 0   | 12  | RDR2-sensitive |
| AGCTG TTCGGATAACGGGTCACGG  | 0   | 13  | RDR2-sensitive |
| AGCTG TTCTCTGAGTCGTTGGGAA  | 0   | 9   | RDR2-sensitive |
| AGCTG TTGAACTACAAGACGGTGT  | 1   | 27  | RDR2-sensitive |
| AGCTG TTGAGGCAGATCCGATCGG  | 1   | 18  | RDR2-sensitive |
| AGCTG TTGGTTAGAATCTAGGTGT  | 1   | 12  | RDR2-sensitive |
| AGCTG TTGTATTGTGGAAGGGCGT  | 0   | 50  | RDR2-sensitive |
| AGCTG TTGTCGGCTACTGACGGTA  | 5   | 22  | RDR2-sensitive |
| AGCTG TTTGACTGCTGCAGCTGC   | 6   | 112 | RDR2-sensitive |
| AGCTG TTTGGATTGCTGCAGCTGC  | 6   | 122 | RDR2-sensitive |
| AGCTG TTTGGATTGCTGCGGCTGC  | 1   | 99  | RDR2-sensitive |
| AGCTG TTTGGCAGAACTTCGGCTT  | 1   | 45  | RDR2-sensitive |
| AGCTG TTTTTTCGATCGTTTTCGAC | 0   | 11  | RDR2-sensitive |
| AGCTTATGTCGGACGGTTCCTAG    | 0   | 9   | RDR2-sensitive |
| AGCTTATGTTTGGTTGTCTGCACA   | 0   | 12  | RDR2-sensitive |
| AGCTTATTTTCGGCGGACAAGCCC   | 0   | 10  | RDR2-sensitive |
| AGCTTCAATTCTGCTAACTCGGTA   | 20  | 1   | RDR2-resistant |
| AGCTTCAGAGCGGCACAGTAGCAT   | 0   | 11  | RDR2-sensitive |
| AGCTTCAGGAGGCACCGGTCGGGC   | 2   | 16  | RDR2-sensitive |
| AGCTTCAGTGCTGTTTATTCCGG    | 21  | 0   | RDR2-resistant |
| AGCTTCGCGGACTTTTAGATGGCC   | 0   | 9   | RDR2-sensitive |
| AGCTTCTTAGAGGGACTATGGCCG   | 93  | 2   | RDR2-resistant |
| AGCTTGACTCTAGTCCGACTTTGT   | 38  | 2   | RDR2-resistant |
| AGCTTGAGGTTGACTGATGAGGAC   | 0   | 20  | RDR2-sensitive |
| AGCTTGC ACTGTGTCGAATGGATA  | 0   | 12  | RDR2-sensitive |
| AGCTTGCGACAGAGCGATGATGGC   | 0   | 10  | RDR2-sensitive |
| AGCTTGCGACTGAGCGATGATGGT   | 0   | 21  | RDR2-sensitive |
| AGCTTGCGGAGTGGACTGCGCATG   | 0   | 18  | RDR2-sensitive |
| AGCTTGGACTGCGGCGTAGGCCTA   | 1   | 62  | RDR2-sensitive |
| AGCTTGGAGGGCGGTTGAGGACGG   | 2   | 14  | RDR2-sensitive |
| AGCTTGGATTCTGACTTAGAGGCG   | 14  | 0   | RDR2-resistant |
| AGCTTGGGGTAGGGTAATGATGGC   | 3   | 30  | RDR2-sensitive |
| AGCTTGGGTTGCGGCACGTGCACT   | 20  | 0   | RDR2-resistant |
| AGCTTGGTTCGACTGTTGAAGTGCA  | 1   | 29  | RDR2-sensitive |
| AGCTTGGTGCGACTCTGTTCTGGC   | 0   | 10  | RDR2-sensitive |
| AGCTTGTAGACATAATAATTTAAA   | 86  | 1   | RDR2-resistant |
| AGCTTGTGACGGTTAGAGTGACAC   | 0   | 9   | RDR2-sensitive |
| AGCTTGTGAGCGGATGGACGTCA    | 8   | 51  | RDR2-sensitive |
| AGCTTGTGAGCGGATGTGACGTC    | 0   | 11  | RDR2-sensitive |
| AGCTTGTGAGCGGATTGACGTCA    | 3   | 34  | RDR2-sensitive |
| AGCTTGTGCGTAGGACAGTTCGG    | 1   | 24  | RDR2-sensitive |
| AGCTTGTGATTGTACGTCCGGTGT   | 0   | 10  | RDR2-sensitive |
| AGCTTGTCTGAACATCAAGCCGG    | 0   | 11  | RDR2-sensitive |
| AGCTTTACTGTTAGAGCAGGGTGT   | 101 | 0   | RDR2-resistant |
| AGCTTTAGAACGACCTCTGATGGC   | 0   | 16  | RDR2-sensitive |
| AGCTTTAGAACGGCCGCTGACGGT   | 0   | 13  | RDR2-sensitive |
| AGCTTTAGGACGGCCGCTGACGGC   | 2   | 47  | RDR2-sensitive |

|                           |    |    |                |
|---------------------------|----|----|----------------|
| AGCTTTAGGCTTAATCGTGTCGGG  | 0  | 21 | RDR2-sensitive |
| AGCTTTGGCAAAGGGACTGGCAA   | 0  | 29 | RDR2-sensitive |
| AGCTTTGGCCCGTCCGACCGCGG   | 1  | 12 | RDR2-sensitive |
| AGCTTTCTGGGTTGTAGCTTCGGC  | 0  | 9  | RDR2-sensitive |
| AGCTTTGCATCGAGCGGAGACGTT  | 0  | 11 | RDR2-sensitive |
| AGCTTTGGACGTTTCATGCGCTCGT | 0  | 20 | RDR2-sensitive |
| AGCTTTGGGACGGCCGCTGACGGC  | 6  | 44 | RDR2-sensitive |
| AGCTTTTGCAGTCGTCTGGTCACA  | 0  | 44 | RDR2-sensitive |
| AGCTTTTTCTCGGGCACTCGGCAA  | 0  | 10 | RDR2-sensitive |
| AGCTTTTTCTTCGATCTTCGGCAC  | 29 | 0  | RDR2-resistant |
| AGGAAAAAGACTCGACGCGGGAGT  | 0  | 12 | RDR2-sensitive |
| AGGAAACAATGGGACTGAGGGCAT  | 0  | 32 | RDR2-sensitive |
| AGGAAACACTGTGTAAGGGGACGC  | 0  | 14 | RDR2-sensitive |
| AGGAAACCTGGGAACCGGCAAAGA  | 3  | 92 | RDR2-sensitive |
| AGGAAACCTGGGAACCGGCAAAGC  | 0  | 49 | RDR2-sensitive |
| AGGAAACCTGGGAACCGGTAAAGA  | 1  | 14 | RDR2-sensitive |
| AGGAAACCTGGGAACCGGTAAAGC  | 1  | 86 | RDR2-sensitive |
| AGGAAACGTGGGAGAGGTGGCTGG  | 0  | 13 | RDR2-sensitive |
| AGGAAACTAGGCACGGCGGGCTAG  | 2  | 27 | RDR2-sensitive |
| AGGAAACTCTCTGGGTCGCCCGAC  | 1  | 32 | RDR2-sensitive |
| AGGAAACTCTGCGCGGCTGGGGTT  | 0  | 9  | RDR2-sensitive |
| AGGAAACTGTAGCCCCTATACGGT  | 0  | 18 | RDR2-sensitive |
| AGGAAACTTATAACTTTTGATGGC  | 0  | 18 | RDR2-sensitive |
| AGGAAAGCTAGTGGAGGACTACCT  | 0  | 19 | RDR2-sensitive |
| AGGAAATATTCTCAACAACCTGATC | 32 | 0  | RDR2-resistant |
| AGGAAATCGACGACTGGCACAAAA  | 0  | 9  | RDR2-sensitive |
| AGGAAATCTGTGACGGCAGGGACT  | 62 | 0  | RDR2-resistant |
| AGGAAATTAGGCACGGTGGGCTAG  | 0  | 33 | RDR2-sensitive |
| AGGAACAAGCAGCTCCGACTCCGC  | 1  | 31 | RDR2-sensitive |
| AGGAACAATGGACGTGGACGTCTT  | 0  | 11 | RDR2-sensitive |
| AGGAACACGACGGTCAGTCGGCGA  | 0  | 13 | RDR2-sensitive |
| AGGAACACGCTAGATGAAGGGCGC  | 0  | 15 | RDR2-sensitive |
| AGGAACAGCGGACAGAACAGGCTA  | 0  | 10 | RDR2-sensitive |
| AGGAACAGTAGACCAAGGCAGATT  | 0  | 34 | RDR2-sensitive |
| AGGAACAGTAGACCCAAGTGGATT  | 0  | 9  | RDR2-sensitive |
| AGGAACAGTAGACCCAGGCAGATT  | 0  | 14 | RDR2-sensitive |
| AGGAACAGTAGACCCAGGCGGATT  | 5  | 93 | RDR2-sensitive |
| AGGAACAGTAGACCCAGGTGGATT  | 3  | 21 | RDR2-sensitive |
| AGGAACAGTGGTAGGAGGAGAGAG  | 0  | 16 | RDR2-sensitive |
| AGGAACAGTGGTAGGGGGAGAGCG  | 0  | 22 | RDR2-sensitive |
| AGGAACAGTGGTAGGGGGGAGAGC  | 0  | 12 | RDR2-sensitive |
| AGGAACATGATGGTCAGTCGGCGA  | 0  | 14 | RDR2-sensitive |
| AGGAACCACACGGAACGACGGAAC  | 0  | 10 | RDR2-sensitive |
| AGGAACCAGGACCTAGCAGACCAT  | 0  | 23 | RDR2-sensitive |
| AGGAACCAGGACCTAGCAGGCCAT  | 0  | 11 | RDR2-sensitive |
| AGGAACCAGGATCCAGCAGGCCAT  | 0  | 17 | RDR2-sensitive |
| AGGAACCAGGCTCGGCTCGGCTCA  | 0  | 10 | RDR2-sensitive |
| AGGAACCCTAACTGATTCTGCGCA  | 7  | 23 | RDR2-sensitive |
| AGGAACCCTGTGGTGCGGTCGGAT  | 0  | 19 | RDR2-sensitive |

|                          |    |    |                |
|--------------------------|----|----|----------------|
| AGGAACGCACCTGTCTGACGTCTG | 0  | 11 | RDR2-sensitive |
| AGGAACGCTGGAACACTGGGACGA | 0  | 56 | RDR2-sensitive |
| AGGAACGGCCCAGGACATGTGCGA | 0  | 12 | RDR2-sensitive |
| AGGAACGGCCCTGAATGCGGTCAA | 0  | 14 | RDR2-sensitive |
| AGGAACGGCCCTGCATGGATTCTC | 0  | 30 | RDR2-sensitive |
| AGGAACGGGAACGAGGAACACGGT | 0  | 9  | RDR2-sensitive |
| AGGAACGGGTAGAGGCAAATACAA | 1  | 14 | RDR2-sensitive |
| AGGAACGTCGACGACAGGAGCAGC | 0  | 19 | RDR2-sensitive |
| AGGAACGTGCCCGTGCGATGCCAC | 0  | 12 | RDR2-sensitive |
| AGGAACTAGAGTGCAGGGACATAA | 1  | 45 | RDR2-sensitive |
| AGGAACTCGCAGGAGAAGCCCCTG | 2  | 26 | RDR2-sensitive |
| AGGAACTCTAGAATGCTCGCGGTG | 0  | 13 | RDR2-sensitive |
| AGGAACTCTATCATCAGCTTGGA  | 30 | 2  | RDR2-resistant |
| AGGAACTGAGGACCTGCGGTACGG | 0  | 14 | RDR2-sensitive |
| AGGAACTGATGAAGTGATGGGCCG | 0  | 9  | RDR2-sensitive |
| AGGAACTGTAAATTTTTACGGCTC | 1  | 80 | RDR2-sensitive |
| AGGAACTGTAAATTTTTACGGCTT | 0  | 16 | RDR2-sensitive |
| AGGAACTGTTGCCTGGTTGGGTAT | 14 | 0  | RDR2-resistant |
| AGGAACTTTGGATGCAAACATGGA | 37 | 0  | RDR2-resistant |
| AGGAAGACGACTCTACACCATCGT | 0  | 9  | RDR2-sensitive |
| AGGAAGACGGGAGTAGAGGACCTC | 0  | 29 | RDR2-sensitive |
| AGGAAGACTGGCAGCGGCACTGAA | 0  | 12 | RDR2-sensitive |
| AGGAAGAGCACGCAGCAGCGCCAT | 0  | 9  | RDR2-sensitive |
| AGGAAGATGGAGCGGACACAACAC | 0  | 12 | RDR2-sensitive |
| AGGAAGATGGTAGACCAGCGCACT | 2  | 14 | RDR2-sensitive |
| AGGAAGCACCAGACACTATCATTT | 63 | 4  | RDR2-resistant |
| AGGAAGCAGACGAACAGAGAGCGC | 0  | 12 | RDR2-sensitive |
| AGGAAGGAGAAGTCGTAACAAGGT | 24 | 1  | RDR2-resistant |
| AGGAAGTCTGTAAGGTCAGGGGAA | 0  | 11 | RDR2-sensitive |
| AGGAAGTTAGTCAGCTGACGGCGT | 0  | 13 | RDR2-sensitive |
| AGGAATAAGCTCGGCGAGGATAGC | 29 | 4  | RDR2-resistant |
| AGGAATCGTTCCGGACTACGGTTT | 1  | 27 | RDR2-sensitive |
| AGGAATCTGGGCGGCTGCTGGCGC | 0  | 15 | RDR2-sensitive |
| AGGAATGAGGTGGTGATGGATCAA | 0  | 10 | RDR2-sensitive |
| AGGAATGATGGCAGAACACGGGAA | 0  | 12 | RDR2-sensitive |
| AGGAATGATGGCAGAACATGGAAT | 0  | 9  | RDR2-sensitive |
| AGGAATGGCAGTAGGTCGGATCCG | 0  | 16 | RDR2-sensitive |
| AGGAATGGCAGTGAGGCTTGACGG | 0  | 12 | RDR2-sensitive |
| AGGAATGGTAGCAGTATCGACGTT | 0  | 19 | RDR2-sensitive |
| AGGAATGGTGGCAGAACACGAGAA | 0  | 14 | RDR2-sensitive |
| AGGAATGGTGGCAGAACACGGAAT | 0  | 25 | RDR2-sensitive |
| AGGAATGTAGCGTTAGCACGGGTT | 4  | 21 | RDR2-sensitive |
| AGGAATGTAGGATAGCAACGGTTT | 0  | 12 | RDR2-sensitive |
| AGGAATGTCTAGTAAGCGCGAGTC | 30 | 3  | RDR2-resistant |
| AGGAATGTGTGCAACGGCAGCTGT | 22 | 0  | RDR2-resistant |
| AGGAATTACGTAATCCCCGTCGGC | 0  | 11 | RDR2-sensitive |
| AGGAATTCGTAGCTCGGCGCCAAG | 4  | 22 | RDR2-sensitive |
| AGGAATTGTGCAATCAAACGGCC  | 0  | 11 | RDR2-sensitive |
| AGGAATTCAGGCATTTAATCATC  | 32 | 4  | RDR2-resistant |

|                            |     |     |                |
|----------------------------|-----|-----|----------------|
| AGGACAAAGCCGGGTGCATCTCAT   | 3   | 20  | RDR2-sensitive |
| AGGACAAATCGACGCGACGAGCAG   | 0   | 18  | RDR2-sensitive |
| AGGACAAATGTAGGTGGGCCTAAT   | 0   | 11  | RDR2-sensitive |
| AGGACAACACGAAGGCCGCGGGTT   | 0   | 14  | RDR2-sensitive |
| AGGACAACACGAGCCGCGGTTCCC   | 1   | 12  | RDR2-sensitive |
| AGGACAACAGGACTGCAGAAGAAT   | 0   | 23  | RDR2-sensitive |
| AGGACAACAGTAGCAGCACAACAG   | 0   | 23  | RDR2-sensitive |
| AGGACAACGGACAGAAACGGTCGC   | 2   | 84  | RDR2-sensitive |
| AGGACAACGTCAGCAGGGACTCGA   | 2   | 29  | RDR2-sensitive |
| AGGACAACACTGTAGGAGGGCCTAAT | 0   | 20  | RDR2-sensitive |
| AGGACAACACTGTAGGTGGGCCTAAT | 22  | 643 | RDR2-sensitive |
| AGGACAACACTGTAGGTGGGCCTACT | 0   | 9   | RDR2-sensitive |
| AGGACAACACTGTAGGTGGGTCTAAT | 2   | 33  | RDR2-sensitive |
| AGGACAAGAATTCATGGGAGGCAA   | 0   | 15  | RDR2-sensitive |
| AGGACAAGAATTTAGGGGGGCCAA   | 0   | 9   | RDR2-sensitive |
| AGGACAAGCGCGCTACAACAACAC   | 0   | 12  | RDR2-sensitive |
| AGGACAAGGCCTTGATCGGACGTT   | 0   | 10  | RDR2-sensitive |
| AGGACAAGGGACGGAGGCGCTAGG   | 1   | 15  | RDR2-sensitive |
| AGGACAATGAGACTCGGAGGCAGA   | 115 | 6   | RDR2-resistant |
| AGGACACAACGAAGACATGGGCAT   | 0   | 13  | RDR2-sensitive |
| AGGACACAACACTCTGGCCCAGGCAC | 0   | 14  | RDR2-sensitive |
| AGGACACACTCAGGCGGCTCAGCT   | 0   | 18  | RDR2-sensitive |
| AGGACACAGAGACGTCACGAACTC   | 0   | 9   | RDR2-sensitive |
| AGGACACCAGAAGACGTCTCTGTC   | 1   | 41  | RDR2-sensitive |
| AGGACACCTCGCTGGCGTTTTGG    | 22  | 0   | RDR2-resistant |
| AGGACACCTGGGAACCGGTAAAGC   | 0   | 12  | RDR2-sensitive |
| AGGACACGAATCCAGTGAGGGCTC   | 0   | 11  | RDR2-sensitive |
| AGGACACGCACCCGAGGCGGGCAC   | 0   | 15  | RDR2-sensitive |
| AGGACACGCACGAAGACCTAGGCAT  | 0   | 17  | RDR2-sensitive |
| AGGACACGCACGAAGACCTGGGCAT  | 1   | 23  | RDR2-sensitive |
| AGGACACGCACGAAGACTCAGGCAT  | 1   | 12  | RDR2-sensitive |
| AGGACACGAGAACAGTGAGGCTGC   | 0   | 15  | RDR2-sensitive |
| AGGACACGCGGCGACAATTCACTC   | 0   | 11  | RDR2-sensitive |
| AGGACACGGCACGGCTAGACACAG   | 0   | 18  | RDR2-sensitive |
| AGGACACGGGTATGACGGATTTTG   | 0   | 31  | RDR2-sensitive |
| AGGACACGTGTGGAGTATCGGCAC   | 0   | 17  | RDR2-sensitive |
| AGGACACTACAGGCAGGTGAACAT   | 0   | 15  | RDR2-sensitive |
| AGGACACTAGGAGACGTCCCTGTC   | 0   | 9   | RDR2-sensitive |
| AGGACACTCCGCACAGTAAGACAC   | 0   | 20  | RDR2-sensitive |
| AGGACACTCGACACATGAAGACAC   | 0   | 9   | RDR2-sensitive |
| AGGACACTCGACACTGGAAGACAC   | 0   | 12  | RDR2-sensitive |
| AGGACACTCGGCACAGAAACACAC   | 0   | 14  | RDR2-sensitive |
| AGGACACTCGGCACAGAGGAACAC   | 1   | 21  | RDR2-sensitive |
| AGGACACTCGGCACAGCGAAGAAC   | 0   | 10  | RDR2-sensitive |
| AGGACACTCGGCACAGGAAAACCC   | 0   | 9   | RDR2-sensitive |
| AGGACACTCGGCACAGGACCACAC   | 4   | 21  | RDR2-sensitive |
| AGGACACTCGGCACAGGACGACAC   | 0   | 24  | RDR2-sensitive |
| AGGACACTCGGCATAGATAGACAC   | 2   | 72  | RDR2-sensitive |
| AGGACACTCGGCATAGGACCACAC   | 1   | 29  | RDR2-sensitive |

|                           |     |     |                |
|---------------------------|-----|-----|----------------|
| AGGACACTCGGTACAGGACGACAC  | 1   | 15  | RDR2-sensitive |
| AGGACACTGGGATTTAGACAGGAT  | 0   | 9   | RDR2-sensitive |
| AGGACAGAACGGCAGACTACTCTT  | 0   | 15  | RDR2-sensitive |
| AGGACAGAACGGCTCCGTTCTACT  | 1   | 46  | RDR2-sensitive |
| AGGACAGAACGGCTCCGTTTTACT  | 0   | 11  | RDR2-sensitive |
| AGGACAGACATACTGCTGCTTGCA  | 0   | 15  | RDR2-sensitive |
| AGGACAGACCCTCAGACGGACCTC  | 0   | 33  | RDR2-sensitive |
| AGGACAGAGAAACGCTATAGCCAG  | 0   | 20  | RDR2-sensitive |
| AGGACAGAGCATATTCCTTTAGGG  | 1   | 16  | RDR2-sensitive |
| AGGACAGAGGAGAGGAGAGAGACG  | 0   | 10  | RDR2-sensitive |
| AGGACAGATCGACGCGCAGGAGCC  | 0   | 19  | RDR2-sensitive |
| AGGACAGCAGATCACCGTTGGTTT  | 0   | 10  | RDR2-sensitive |
| AGGACAGCAGTAGCAGCACAAACAG | 0   | 17  | RDR2-sensitive |
| AGGACAGCATAGGGGTGTTGACCA  | 0   | 20  | RDR2-sensitive |
| AGGACAGCCAGGACAGGGACGTCT  | 0   | 14  | RDR2-sensitive |
| AGGACAGGAACACAGTGGGCTGAC  | 1   | 17  | RDR2-sensitive |
| AGGACAGGAGACCGCTCGTGACGA  | 0   | 10  | RDR2-sensitive |
| AGGACAGGAGCATTCAATGTGCAT  | 0   | 26  | RDR2-sensitive |
| AGGACAGGATATGGCTACATTGTT  | 19  | 0   | RDR2-resistant |
| AGGACAGTACTATCCTGCGTTGTC  | 0   | 11  | RDR2-sensitive |
| AGGACAGTAGGGGAGTAGACGCGAT | 0   | 16  | RDR2-sensitive |
| AGGACAGTCCAGCAGGAACATCAG  | 0   | 9   | RDR2-sensitive |
| AGGACAGTTCGGCTAGGCCGGTGA  | 0   | 9   | RDR2-sensitive |
| AGGACAGTTGGTTAGGAAGGCTTC  | 0   | 11  | RDR2-sensitive |
| AGGACATAAGTTGCACGCGCGCAT  | 0   | 9   | RDR2-sensitive |
| AGGACATAATGGTCTTCGGACGAA  | 73  | 0   | RDR2-resistant |
| AGGACATCAGGCCTGCGACGACGT  | 0   | 18  | RDR2-sensitive |
| AGGACATCCCGACGACGACGCTAC  | 0   | 11  | RDR2-sensitive |
| AGGACATCGCAACCCGAGAGCGGA  | 1   | 29  | RDR2-sensitive |
| AGGACATCGTAACCCAAGAGCGGA  | 0   | 19  | RDR2-sensitive |
| AGGACATCGTAACCCGAGAGCAGA  | 0   | 9   | RDR2-sensitive |
| AGGACATCGTAACCCGAGAGCGGA  | 4   | 186 | RDR2-sensitive |
| AGGACATCGTAACCTGAGAGCGGA  | 3   | 32  | RDR2-sensitive |
| AGGACATCTGTAGGTAGGCCTAAT  | 0   | 17  | RDR2-sensitive |
| AGGACATCTGTAGGTGGGCCTAAT  | 0   | 15  | RDR2-sensitive |
| AGGACATCTTGTGATCGGTATGGC  | 61  | 4   | RDR2-resistant |
| AGGACATGACCATCGCAGTGACGT  | 0   | 87  | RDR2-sensitive |
| AGGACATGTACAGTGGAGAGACAC  | 0   | 10  | RDR2-sensitive |
| AGGACATGTATAGTGGAGAGACAT  | 0   | 13  | RDR2-sensitive |
| AGGACATGTGATCGGTATGGCTAT  | 0   | 16  | RDR2-sensitive |
| AGGACATTCGGCATAGAGAGACAC  | 0   | 12  | RDR2-sensitive |
| AGGACATTTCTGAAAGCACAAAG   | 257 | 45  | RDR2-resistant |
| AGGACCAACTGAAGCGCATCTCGC  | 1   | 13  | RDR2-sensitive |
| AGGACCACACTCGGCAAAGACATG  | 0   | 9   | RDR2-sensitive |
| AGGACCACACTCGGCAAAGACTTG  | 0   | 15  | RDR2-sensitive |
| AGGACCACTGAACCGGACGTTGGC  | 3   | 54  | RDR2-sensitive |
| AGGACCAGACTTAAGGGAGCCCGC  | 0   | 14  | RDR2-sensitive |
| AGGACCAGAGCTCTTTACAGAAG   | 1   | 19  | RDR2-sensitive |
| AGGACCAGAGTGAGTGCAGTGAGT  | 0   | 9   | RDR2-sensitive |

|                           |    |     |                |
|---------------------------|----|-----|----------------|
| AGGACCAGCAGACTGCAGGACCGC  | 0  | 9   | RDR2-sensitive |
| AGGACCAGTAGAAGCTACAGCCGA  | 0  | 16  | RDR2-sensitive |
| AGGACCATATTCTTGTGCTCTTGG  | 21 | 0   | RDR2-resistant |
| AGGACCATCACTACGAAATTCGTT  | 22 | 1   | RDR2-resistant |
| AGGACCATGAATCCCCTGGCAGAA  | 0  | 9   | RDR2-sensitive |
| AGGACCATGCAAGTCTGATCCTGA  | 0  | 19  | RDR2-sensitive |
| AGGACCATTTAGAGGACGCTGCTG  | 0  | 48  | RDR2-sensitive |
| AGGACCATTTAGAGGACGTTGCTG  | 1  | 16  | RDR2-sensitive |
| AGGACCATTTAGATGACGTTGCTG  | 0  | 16  | RDR2-sensitive |
| AGGACCCAACCTGACGCTGTTGAC  | 0  | 16  | RDR2-sensitive |
| AGGACCCACAGCAGAAGTCTAGT   | 0  | 14  | RDR2-sensitive |
| AGGACCCACGCGAAGTCTAGGCAT  | 0  | 28  | RDR2-sensitive |
| AGGACCCACCTTGATCGACCCAA   | 0  | 10  | RDR2-sensitive |
| AGGACCCCATCTCCTAGGCGTCGG  | 0  | 28  | RDR2-sensitive |
| AGGACCCCTCAAGCGACGGACAC   | 0  | 11  | RDR2-sensitive |
| AGGACCCCTCCAGCAACGGACAC   | 1  | 19  | RDR2-sensitive |
| AGGACCCTGAGCTCGCTGGAGGCT  | 0  | 11  | RDR2-sensitive |
| AGGACCCTTTGATCGATCCGGCAC  | 0  | 14  | RDR2-sensitive |
| AGGACCGAACCGAGAAGGTGGCAC  | 0  | 10  | RDR2-sensitive |
| AGGACCGAAGAGCAGGCGAGCAGC  | 0  | 10  | RDR2-sensitive |
| AGGACCGACACGTAGAGGGCGCTG  | 0  | 48  | RDR2-sensitive |
| AGGACCGACACGTAGGAGGGCGCTG | 0  | 17  | RDR2-sensitive |
| AGGACCGACACGTAGGGGGCGCTG  | 0  | 25  | RDR2-sensitive |
| AGGACCGACGATATTGCATAGCAC  | 0  | 20  | RDR2-sensitive |
| AGGACCGACGCGTAGAGGGCGCTG  | 0  | 13  | RDR2-sensitive |
| AGGACCGACGCGTAGGAGGGCGCTG | 0  | 14  | RDR2-sensitive |
| AGGACCGAGAGATGACGATCGTGC  | 0  | 19  | RDR2-sensitive |
| AGGACCGAGGACATCGACGGAGAT  | 3  | 23  | RDR2-sensitive |
| AGGACCGCTGAAGACTAGCTCCGC  | 1  | 51  | RDR2-sensitive |
| AGGACCGCTGACCTAGAGTAGCAT  | 0  | 12  | RDR2-sensitive |
| AGGACCGGATGTAGGGACGTGCAG  | 0  | 31  | RDR2-sensitive |
| AGGACCGTCTGAAGAAATGGGCAA  | 0  | 12  | RDR2-sensitive |
| AGGACCGTTTAGAGGACGCTGCTG  | 0  | 44  | RDR2-sensitive |
| AGGACCGTTTAGAAGACGCTGCTG  | 1  | 22  | RDR2-sensitive |
| AGGACCGTTTAGAGGACGCTGCTA  | 0  | 18  | RDR2-sensitive |
| AGGACCGTTTAGAGGACGCTGCTG  | 4  | 208 | RDR2-sensitive |
| AGGACCGTTTAGAGGACGTTGCTG  | 16 | 560 | RDR2-sensitive |
| AGGACCGTTTAGAGGACGTTGTTG  | 0  | 20  | RDR2-sensitive |
| AGGACCGTTTAGATGACGCTGCTG  | 0  | 12  | RDR2-sensitive |
| AGGACCGTTTAGATGACGTTGCTG  | 0  | 12  | RDR2-sensitive |
| AGGACCTAGATGTGCTACTCGGAT  | 0  | 10  | RDR2-sensitive |
| AGGACCTCGATGGGTGGAACAGGC  | 0  | 17  | RDR2-sensitive |
| AGGACCTCGTCAGGCGTCAGTCGT  | 0  | 10  | RDR2-sensitive |
| AGGACCTCGTTAGGCGTCAGTCGT  | 0  | 12  | RDR2-sensitive |
| AGGACCTGACGACGACATGAGTAC  | 0  | 59  | RDR2-sensitive |
| AGGACCTGAGAAGAGCAAGATCGA  | 0  | 16  | RDR2-sensitive |
| AGGACCTGCCTGCAGCATGCTGGA  | 0  | 9   | RDR2-sensitive |
| AGGACCTGTCCAAGAGGAGGACCA  | 0  | 10  | RDR2-sensitive |
| AGGACCTGTCTGAGCAGAGGCTGA  | 0  | 33  | RDR2-sensitive |

|                           |    |     |                |
|---------------------------|----|-----|----------------|
| AGGACCTGTTTCGTTGGATGACCGC | 2  | 16  | RDR2-sensitive |
| AGGACCTGTTCTATGGATGACCGC  | 14 | 123 | RDR2-sensitive |
| AGGACCTTCGGAAGACGAAGACCC  | 0  | 9   | RDR2-sensitive |
| AGGACCTTCGGAAGAGGAAGACCC  | 0  | 11  | RDR2-sensitive |
| AGGACCTTGTGACCCGATTTGCGG  | 28 | 5   | RDR2-resistant |
| AGGACCTTGTGGAGACGTAGAGG   | 0  | 11  | RDR2-sensitive |
| AGGACCTTGTGGAGGCGTAGAGG   | 2  | 18  | RDR2-sensitive |
| AGGACCTTTGGAACCGGCCATTAT  | 0  | 9   | RDR2-sensitive |
| AGGACGAAAATTCAGGGGGGCCAA  | 1  | 47  | RDR2-sensitive |
| AGGACGAAATTGGGCAGCAGCTTT  | 0  | 9   | RDR2-sensitive |
| AGGACGAACCACGCGAGGACGTGA  | 0  | 9   | RDR2-sensitive |
| AGGACGAAGCCTGAACCAGACGAA  | 2  | 28  | RDR2-sensitive |
| AGGACGAAGCTTGCAGAGAACCGG  | 0  | 15  | RDR2-sensitive |
| AGGACGAAGGAAGCATAGGGCTTT  | 0  | 9   | RDR2-sensitive |
| AGGACGACACTCGGC AAAGACAAG | 0  | 10  | RDR2-sensitive |
| AGGACGACACTCGGC AAAGACTAG | 2  | 51  | RDR2-sensitive |
| AGGACGACAGAGCAGAGAAGTGGC  | 0  | 10  | RDR2-sensitive |
| AGGACGACCCAGTAGAAGGCCCGT  | 1  | 112 | RDR2-sensitive |
| AGGACGACGAACGCCATGGCGGGT  | 0  | 11  | RDR2-sensitive |
| AGGACGACGAACGTGCAGAGCTTC  | 2  | 25  | RDR2-sensitive |
| AGGACGACGCGCTTTTACTCCGGA  | 0  | 9   | RDR2-sensitive |
| AGGACGACGCTACTTCTTGCTGCT  | 47 | 13  | RDR2-resistant |
| AGGACGACGCTGCGGACGGGCTGC  | 0  | 26  | RDR2-sensitive |
| AGGACGACGGTAGGCGTGATCCGC  | 1  | 58  | RDR2-sensitive |
| AGGACGACTCATCGGGAAGCCCGC  | 0  | 10  | RDR2-sensitive |
| AGGACGACTCGGTAGAAGCCATGT  | 0  | 13  | RDR2-sensitive |
| AGGACGAGAATCCACAGGGGCTAA  | 0  | 11  | RDR2-sensitive |
| AGGACGAGATTCTTTGTAAGAGGG  | 78 | 5   | RDR2-resistant |
| AGGACGAGGACAGGTGTAGGTGGT  | 0  | 9   | RDR2-sensitive |
| AGGACGAGGACGACAATCGGGCGT  | 0  | 11  | RDR2-sensitive |
| AGGACGAGGACGTACTACTCCC    | 0  | 16  | RDR2-sensitive |
| AGGACGAGGAGTAGGTTGGTACGT  | 24 | 0   | RDR2-resistant |
| AGGACGAGGATGACAATCAGGTGT  | 0  | 14  | RDR2-sensitive |
| AGGACGAGGCGCTGGGCAGAGCAG  | 0  | 9   | RDR2-sensitive |
| AGGACGATATGCAAGCAGACACAA  | 0  | 12  | RDR2-sensitive |
| AGGACGATGAGCAGCAATGGCCAG  | 0  | 10  | RDR2-sensitive |
| AGGACGATGCATGAACGGCTTGAT  | 0  | 17  | RDR2-sensitive |
| AGGACGCAGACAACGACGACGCAA  | 0  | 14  | RDR2-sensitive |
| AGGACGCAGACGCTAGGGTTTCGGC | 0  | 21  | RDR2-sensitive |
| AGGACGCAGGACTAGCAGACTTCG  | 0  | 13  | RDR2-sensitive |
| AGGACGCCGACGACTGCACGGCAC  | 55 | 2   | RDR2-resistant |
| AGGACGCGAGCTGAAGCAGAGCGA  | 0  | 9   | RDR2-sensitive |
| AGGACGCGCGAACGAGATAGGCAC  | 0  | 19  | RDR2-sensitive |
| AGGACGCGCGGTAAGACTGAGCAT  | 0  | 39  | RDR2-sensitive |
| AGGACGCGGCACCAGACGACGCAT  | 0  | 12  | RDR2-sensitive |
| AGGACGCGGCTCTAGTCGGATGGA  | 56 | 0   | RDR2-resistant |
| AGGACGCGGGTATGACGGATTTTG  | 0  | 12  | RDR2-sensitive |
| AGGACGCTATAGAGGCCCTTGCTG  | 0  | 9   | RDR2-sensitive |
| AGGACGCTGAATATGGCCATGCTT  | 17 | 0   | RDR2-resistant |



|                           |    |    |                |
|---------------------------|----|----|----------------|
| AGGACGCTGCTGAAACGAGTAGAG  | 0  | 21 | RDR2-sensitive |
| AGGACGCTGCTGGAGACGGAGAAT  | 0  | 15 | RDR2-sensitive |
| AGGACGCTGCTGGAGAGCATAGAG  | 0  | 9  | RDR2-sensitive |
| AGGACGCTGCTGGAGGGCGTAGAG  | 0  | 22 | RDR2-sensitive |
| AGGACGCTGTTCGAGACCACCGGAT | 0  | 55 | RDR2-sensitive |
| AGGACGGAATGGGAATGGCAGAAC  | 1  | 27 | RDR2-sensitive |
| AGGACGGACTGAGGGATGACCGGA  | 0  | 12 | RDR2-sensitive |
| AGGACGGAGCGAAGACACGGCTGT  | 0  | 79 | RDR2-sensitive |
| AGGACGGAGGATATGATGTGTAGT  | 61 | 0  | RDR2-resistant |
| AGGACGGATATAGAGGACGTTGCT  | 0  | 18 | RDR2-sensitive |
| AGGACGGATATAGAGGATGGATAT  | 0  | 17 | RDR2-sensitive |
| AGGACGGCACTCGGCAAAGACTAG  | 0  | 10 | RDR2-sensitive |
| AGGACGGCGATTAGGCCTGCTATG  | 25 | 2  | RDR2-resistant |
| AGGACGGGACGACGTGGACAGCGG  | 0  | 9  | RDR2-sensitive |
| AGGACGGGGAACAGGCTACCATAC  | 0  | 10 | RDR2-sensitive |
| AGGACGGTAGAGCAGAGAAGCAGC  | 0  | 13 | RDR2-sensitive |
| AGGACGGTATAGAGTGCCTTGCTG  | 0  | 33 | RDR2-sensitive |
| AGGACGGTCTGACGTTGACTCGGC  | 0  | 15 | RDR2-sensitive |
| AGGACGGTTCATAGCAGACCCTGC  | 0  | 9  | RDR2-sensitive |
| AGGACGTAACCTCGGGAGCGGGCAA | 0  | 28 | RDR2-sensitive |
| AGGACGTAACCTCGGGAGTGGACGG | 0  | 24 | RDR2-sensitive |
| AGGACGTAACCTCGTGAGGAGGCAA | 0  | 17 | RDR2-sensitive |
| AGGACGTAGCCCGGAGCGGACGG   | 0  | 15 | RDR2-sensitive |
| AGGACGTAGGCATTGTTTCGGTCAT | 0  | 9  | RDR2-sensitive |
| AGGACGTAGGGTGTACGCATCTC   | 4  | 41 | RDR2-sensitive |
| AGGACGTGACGACTGCACGGCAC   | 0  | 25 | RDR2-sensitive |
| AGGACGTGAAGGACGCCGACGACT  | 28 | 1  | RDR2-resistant |
| AGGACGTGACACAACAGGACGTAT  | 1  | 26 | RDR2-sensitive |
| AGGACGTGATTTAGAGGACGTTGT  | 1  | 56 | RDR2-sensitive |
| AGGACGTGCAGATGATGGCGTGAA  | 0  | 17 | RDR2-sensitive |
| AGGACGTGCAGTACTGCGGTGCGG  | 0  | 9  | RDR2-sensitive |
| AGGACGTGCATACTGGTCTCTCAT  | 0  | 9  | RDR2-sensitive |
| AGGACGTGCTTTTCTAATATCTTA  | 18 | 1  | RDR2-resistant |
| AGGACGTGGGACTAGCAGACTTCG  | 0  | 14 | RDR2-sensitive |
| AGGACGTTGCTGGAGACAGCCTAA  | 0  | 13 | RDR2-sensitive |
| AGGACGTTGCTGGAGAGAGTAGAG  | 0  | 9  | RDR2-sensitive |
| AGGACGTTGTTGGAGAGGAAGGAG  | 0  | 12 | RDR2-sensitive |
| AGGACGTTGTTGGGACGGTGGAG   | 0  | 11 | RDR2-sensitive |
| AGGACTAACGAAGGCAGAACGGCA  | 0  | 10 | RDR2-sensitive |
| AGGACTAAGGGCATACTGCCTGAT  | 0  | 20 | RDR2-sensitive |
| AGGACTACGGTGAGGTGCATGGAG  | 0  | 9  | RDR2-sensitive |
| AGGACTACGTAGAAGAGGAAGGAA  | 0  | 15 | RDR2-sensitive |
| AGGACTAGATTGATCATTGTCGGG  | 0  | 11 | RDR2-sensitive |
| AGGACTAGGACCTCGTCAGGCGTC  | 1  | 72 | RDR2-sensitive |
| AGGACTAGGACCTCGTTAGGCGTC  | 0  | 9  | RDR2-sensitive |
| AGGACTAGGCCATAGGCCGGCTC   | 0  | 11 | RDR2-sensitive |
| AGGACTAGTTGGAACAGCACCGCA  | 0  | 9  | RDR2-sensitive |
| AGGACTATCCTGGCCAAAACCGGT  | 51 | 3  | RDR2-resistant |
| AGGACTATCCTGGCCAAAGCCGGT  | 0  | 13 | RDR2-sensitive |

|                           |    |    |                |
|---------------------------|----|----|----------------|
| AGGACTATGACGTCATCTTGGCAC  | 2  | 17 | RDR2-sensitive |
| AGGACTATGGCGTCATCTTGGCAC  | 0  | 17 | RDR2-sensitive |
| AGGACTATTTAGAGGACGCTGCTG  | 0  | 12 | RDR2-sensitive |
| AGGACTCACATTTGCATCGATGAC  | 18 | 0  | RDR2-resistant |
| AGGACTCACGTAGGAGGAATAGGT  | 1  | 38 | RDR2-sensitive |
| AGGACTCACTACCGGAATTTGGCT  | 0  | 10 | RDR2-sensitive |
| AGGACTCAGAGCCGTTCCGGCCAGC | 0  | 22 | RDR2-sensitive |
| AGGACTCAGCACGGTTCGTATGT   | 0  | 12 | RDR2-sensitive |
| AGGACTCAGGAAGAGAGACGACCC  | 0  | 23 | RDR2-sensitive |
| AGGACTCAGGACACACGACGACAC  | 0  | 31 | RDR2-sensitive |
| AGGACTCAGGACACAGGACGACAC  | 0  | 26 | RDR2-sensitive |
| AGGACTCCCTAGCTCGGCGTCAAG  | 0  | 17 | RDR2-sensitive |
| AGGACTCCGCAACCAGACTCCGGT  | 0  | 10 | RDR2-sensitive |
| AGGACTCGACAGCCCCGACAGCTA  | 2  | 25 | RDR2-sensitive |
| AGGACTCGACAGCCCCGACAGCTT  | 0  | 16 | RDR2-sensitive |
| AGGACTCGACGGCAGCGCAACGCC  | 0  | 32 | RDR2-sensitive |
| AGGACTCGACTCTCCCAAGGACG   | 15 | 0  | RDR2-resistant |
| AGGACTCGCGGAGACGGGGATTG   | 0  | 12 | RDR2-sensitive |
| AGGACTCGCTCGCGCAGGGCTGCA  | 0  | 17 | RDR2-sensitive |
| AGGACTCGGCAAGCGACGACGCGA  | 0  | 15 | RDR2-sensitive |
| AGGACTCGGCACTTTGACGAAGGC  | 2  | 25 | RDR2-sensitive |
| AGGACTCGGCGAGCAACGACGCGA  | 0  | 25 | RDR2-sensitive |
| AGGACTCGGCGAGCAGCGACACGA  | 0  | 10 | RDR2-sensitive |
| AGGACTCGGCGCTTTGACGAAGGC  | 1  | 17 | RDR2-sensitive |
| AGGACTCTCGACACAAGGAGACAC  | 0  | 14 | RDR2-sensitive |
| AGGACTCTCGACACACGTAGACAC  | 0  | 16 | RDR2-sensitive |
| AGGACTCTCGGCACACAAAGACAC  | 0  | 30 | RDR2-sensitive |
| AGGACTCTCGGCACACGAAGACAC  | 1  | 17 | RDR2-sensitive |
| AGGACTCTCGGCACAGACTCGGCG  | 2  | 32 | RDR2-sensitive |
| AGGACTCTCGGCACAGGAAGACAC  | 2  | 14 | RDR2-sensitive |
| AGGACTCTCGGCATAGGAAGACAT  | 0  | 16 | RDR2-sensitive |
| AGGACTCTCGGTACAGGAAGACAC  | 0  | 24 | RDR2-sensitive |
| AGGACTCTCTGCGGAGGCCGCGGAC | 0  | 12 | RDR2-sensitive |
| AGGACTCTGACTGAGCTCAGAGAT  | 0  | 10 | RDR2-sensitive |
| AGGACTCTGCCGAGGGCGGACACTC | 0  | 11 | RDR2-sensitive |
| AGGACTCTTGTCTGATCTTAAGGC  | 0  | 25 | RDR2-sensitive |
| AGGACTGAACAGGCCGAATCGGCT  | 0  | 10 | RDR2-sensitive |
| AGGACTGAACCGAGAGGATCCGGC  | 0  | 9  | RDR2-sensitive |
| AGGACTGACAACAACGTCGGTTGC  | 35 | 1  | RDR2-resistant |
| AGGACTGACACACGTGCGCGCCAC  | 0  | 9  | RDR2-sensitive |
| AGGACTGACCGGCTGCATGAGGAT  | 45 | 0  | RDR2-resistant |
| AGGACTGACGCGGCACCGACGGGC  | 0  | 10 | RDR2-sensitive |
| AGGACTGAGCATATATGTAGGTCA  | 0  | 33 | RDR2-sensitive |
| AGGACTGAGGATGGACGGTTACAC  | 0  | 9  | RDR2-sensitive |
| AGGACTGAGTCGGCTCAAACCCAG  | 0  | 10 | RDR2-sensitive |
| AGGACTGATGTCCACCTACGTCAT  | 0  | 10 | RDR2-sensitive |
| AGGACTGCAGGAGGGCGGACGGCG  | 0  | 12 | RDR2-sensitive |
| AGGACTGCAGGAGTAAGGACGCAT  | 0  | 10 | RDR2-sensitive |
| AGGACTGCCACACGCGCGTGCCGC  | 0  | 11 | RDR2-sensitive |

|                            |     |     |                |
|----------------------------|-----|-----|----------------|
| AGGACTGCCCTTCAGCAGGGACG    | 0   | 11  | RDR2-sensitive |
| AGGACTGCTATACGTGCGGACGG    | 0   | 17  | RDR2-sensitive |
| AGGACTGGAGGGAGAGAGAAACGC   | 0   | 9   | RDR2-sensitive |
| AGGACTGGATCCAGAAAGCAGCTT   | 0   | 9   | RDR2-sensitive |
| AGGACTGGCGAGCGGCGACCGGCG   | 0   | 9   | RDR2-sensitive |
| AGGACTGGGCATTTTTAACCCGAA   | 0   | 9   | RDR2-sensitive |
| AGGACTGGGCCAGTAGGGCAGGCC   | 0   | 9   | RDR2-sensitive |
| AGGACTGGGCCGCGTCAGCCAACC   | 0   | 19  | RDR2-sensitive |
| AGGACTGGGCGTTTCGGGTTTACCC  | 0   | 9   | RDR2-sensitive |
| AGGACTGGGGGCACAAGGACGGAC   | 0   | 12  | RDR2-sensitive |
| AGGACTGGGGGCATGGTGATGCTC   | 0   | 10  | RDR2-sensitive |
| AGGACTGTACCGAGTGCGGCGCTC   | 0   | 18  | RDR2-sensitive |
| AGGACTGTAGGAGCATAGGTTACA   | 0   | 9   | RDR2-sensitive |
| AGGACTGTCACGTTAGTCGAGGAT   | 1   | 20  | RDR2-sensitive |
| AGGACTGTCAGGTCCCCTACGGCT   | 1   | 14  | RDR2-sensitive |
| AGGACTGTCCGGTGTGCCACCCTT   | 1   | 12  | RDR2-sensitive |
| AGGACTGTGCAGGCACGACTCGGT   | 0   | 41  | RDR2-sensitive |
| AGGACTGTGCAGGCCCGGCCCGGC   | 0   | 14  | RDR2-sensitive |
| AGGACTGTGCGGACGGTGGTTGGT   | 0   | 15  | RDR2-sensitive |
| AGGACTGTGTAGGCCCGGCCCGAC   | 0   | 22  | RDR2-sensitive |
| AGGACTGTGTGAGCGCGGCTCTC    | 0   | 11  | RDR2-sensitive |
| AGGACTGTTACAGTGTAGCGGCT    | 3   | 19  | RDR2-sensitive |
| AGGACTGTTCCCTTCAGCAGGGAGG  | 0   | 9   | RDR2-sensitive |
| AGGACTGTTTAGAGGACGCTGCTG   | 1   | 24  | RDR2-sensitive |
| AGGACTGTTTAGAGGACGTTGCTG   | 0   | 16  | RDR2-sensitive |
| AGGACTTAGGGCGGGTACACTCCG   | 0   | 21  | RDR2-sensitive |
| AGGACTTAGGGCGGGTGC ACTCCA  | 0   | 52  | RDR2-sensitive |
| AGGACTTAGGGCGGGTGC ACTCCG  | 2   | 39  | RDR2-sensitive |
| AGGACTTAGGGCGGGTGC ACTCTG  | 0   | 17  | RDR2-sensitive |
| AGGACTTACCAAGTGC GGCTCTC   | 2   | 18  | RDR2-sensitive |
| AGGACTTACAGCTGAAGGCCGTCGT  | 0   | 16  | RDR2-sensitive |
| AGGACTTACAGCTGAAGGTCGTCGT  | 1   | 45  | RDR2-sensitive |
| AGGACTTCTGGCCAGGAGAACGAG   | 0   | 9   | RDR2-sensitive |
| AGGACTTGCTGCATGATGGCGCGA   | 0   | 9   | RDR2-sensitive |
| AGGACTTGGAGAAGCCGTTCCGGCC  | 0   | 10  | RDR2-sensitive |
| AGGACTTGGAGGTGCTACTCGGAA   | 1   | 14  | RDR2-sensitive |
| AGGACTTGGCGAGTAGCGACGCGA   | 0   | 9   | RDR2-sensitive |
| AGGACTTGTAGAGCATGATGGCTT   | 0   | 32  | RDR2-sensitive |
| AGGACTTGTGGAGCATGATGGCTT   | 0   | 32  | RDR2-sensitive |
| AGGACTTTACCGAGTACGGCTCTC   | 0   | 13  | RDR2-sensitive |
| AGGACTTTACCGAGTGC GGCTCTC  | 4   | 23  | RDR2-sensitive |
| AGGACTTTGACTATTTTGC GGCCCT | 158 | 0   | RDR2-resistant |
| AGGACTTTGCCAAGTGC GGCACTC  | 0   | 14  | RDR2-sensitive |
| AGGACTTTGCCAAGTGC GGCGCTC  | 2   | 21  | RDR2-sensitive |
| AGGACTTTGCCAAGTGC GGCTCTC  | 1   | 31  | RDR2-sensitive |
| AGGACTTTGCCATGACAGCTGCAT   | 1   | 31  | RDR2-sensitive |
| AGGACTTTGCCGAGTGC GGCACTC  | 16  | 51  | RDR2-sensitive |
| AGGACTTTGCCGAGTGC GGCGCTC  | 52  | 106 | RDR2-sensitive |
| AGGACTTTGCCGAGTGC GGCTCTC  | 24  | 57  | RDR2-sensitive |

|                           |    |    |                |
|---------------------------|----|----|----------------|
| AGGACTTTGTTCGAGTGCGGCTCTC | 9  | 50 | RDR2-sensitive |
| AGGAGAAAGGTCCCGAGTCACGC   | 0  | 9  | RDR2-sensitive |
| AGGAGAAGTGTAGGTGGGCCTAAT  | 1  | 17 | RDR2-sensitive |
| AGGAGAAGGCACTAGAGCATGAGT  | 0  | 9  | RDR2-sensitive |
| AGGAGAATCTGGCTGTGGGGAGAA  | 0  | 15 | RDR2-sensitive |
| AGGAGAATCTGGCTGTGTAGAGAA  | 0  | 16 | RDR2-sensitive |
| AGGAGAATGCTGAGGATGATGGGC  | 0  | 10 | RDR2-sensitive |
| AGGAGACACGATGTAGGGTTGGAC  | 0  | 9  | RDR2-sensitive |
| AGGAGACAGAACATGGCGCACAGA  | 0  | 9  | RDR2-sensitive |
| AGGAGACAGCAGTGCAAGCCTCTG  | 0  | 12 | RDR2-sensitive |
| AGGAGACATGACAGACCTAGTGTG  | 17 | 0  | RDR2-resistant |
| AGGAGACCACCAACCAGAAGGACG  | 0  | 19 | RDR2-sensitive |
| AGGAGACCCGTAACAGAACTAGTT  | 0  | 10 | RDR2-sensitive |
| AGGAGACCGACACGTAGGAGGCGC  | 0  | 9  | RDR2-sensitive |
| AGGAGACCGACACGTAGGGCGCTA  | 0  | 24 | RDR2-sensitive |
| AGGAGACCGACACGTAGGGGACGC  | 0  | 37 | RDR2-sensitive |
| AGGAGACCGACACGTAGGGGCGC   | 1  | 13 | RDR2-sensitive |
| AGGAGACCGTACTTGGGGCTGCGT  | 0  | 14 | RDR2-sensitive |
| AGGAGACCGTAGCAGAGACTGTAA  | 0  | 17 | RDR2-sensitive |
| AGGAGACCTACTGGGCTTGCTGAC  | 36 | 2  | RDR2-resistant |
| AGGAGACCTAGCGACGGAGAACGG  | 0  | 15 | RDR2-sensitive |
| AGGAGACCTCGAAGGGAGTAGGAG  | 0  | 19 | RDR2-sensitive |
| AGGAGACGACAACCTAGACCTCTC  | 0  | 17 | RDR2-sensitive |
| AGGAGACGAGAAGCTGCAACCTTT  | 1  | 14 | RDR2-sensitive |
| AGGAGACGAGATCTGCGCTATTA   | 0  | 9  | RDR2-sensitive |
| AGGAGACGAGCTCTCTACATCTTC  | 0  | 12 | RDR2-sensitive |
| AGGAGACGAGGCAGGGTAGCACTA  | 0  | 11 | RDR2-sensitive |
| AGGAGACGCTGCTGAAGACTGAGA  | 0  | 10 | RDR2-sensitive |
| AGGAGACGCTGTAGGGGACAGCAT  | 0  | 14 | RDR2-sensitive |
| AGGAGACGGAGAGACCGAGGGCGA  | 0  | 9  | RDR2-sensitive |
| AGGAGACGGGCACAGGAACATGAA  | 18 | 1  | RDR2-resistant |
| AGGAGACGGGCAGCTGAAGGACAA  | 0  | 9  | RDR2-sensitive |
| AGGAGACGGGCCTAGAACGCGTGT  | 0  | 12 | RDR2-sensitive |
| AGGAGACGGTAGAAGCTTGTITTC  | 0  | 11 | RDR2-sensitive |
| AGGAGACGTAGAAGAGACGCGCGC  | 0  | 18 | RDR2-sensitive |
| AGGAGACGTCAGCAAGGACCCGAC  | 0  | 26 | RDR2-sensitive |
| AGGAGACGTCAGCAAGGACTCGAC  | 0  | 25 | RDR2-sensitive |
| AGGAGACGTCAGCAAGGATCCGAC  | 0  | 11 | RDR2-sensitive |
| AGGAGACGTCAGCAAGGATTCGAC  | 0  | 12 | RDR2-sensitive |
| AGGAGACGCTGACTTTTTTCCAT   | 54 | 0  | RDR2-resistant |
| AGGAGACGTGGCTTGCATGAACAG  | 0  | 47 | RDR2-sensitive |
| AGGAGACGTGTTTACTCATGCAT   | 0  | 15 | RDR2-sensitive |
| AGGAGACTAGGACGACAGTGACGA  | 0  | 13 | RDR2-sensitive |
| AGGAGACTGAATTTAGGGCACGCT  | 0  | 13 | RDR2-sensitive |
| AGGAGACTGACACGTAGGAGGCGC  | 1  | 40 | RDR2-sensitive |
| AGGAGACTGATCCTGGAGTTGCAT  | 0  | 10 | RDR2-sensitive |
| AGGAGACTGATCCTGCCGTTGAT   | 0  | 11 | RDR2-sensitive |
| AGGAGACTGCATGGAGTGCCTAT   | 0  | 20 | RDR2-sensitive |
| AGGAGACTGCTTGCTGCCACCCAA  | 0  | 14 | RDR2-sensitive |

|                            |    |     |                |
|----------------------------|----|-----|----------------|
| AGGAGACTGGGTAACATAGACTTG   | 0  | 10  | RDR2-sensitive |
| AGGAGACTGTAAACGATCCGGTAC   | 0  | 14  | RDR2-sensitive |
| AGGAGACTGTAAAGGACGGATATA   | 0  | 32  | RDR2-sensitive |
| AGGAGACTGTAGCGCCCGATAGGC   | 0  | 9   | RDR2-sensitive |
| AGGAGACTGTCCACTGCTTCAAAC   | 38 | 0   | RDR2-resistant |
| AGGAGACTTGGGGCTACTGTAAGG   | 0  | 15  | RDR2-sensitive |
| AGGAGACTTTAGTACTGGTTCATG   | 0  | 9   | RDR2-sensitive |
| AGGAGACTTTTGGGATTATAACAC   | 0  | 16  | RDR2-sensitive |
| AGGAGAGACGTACTIONGGCACCTGC | 1  | 24  | RDR2-sensitive |
| AGGAGAGAGAACGCTGACGTGGCA   | 0  | 14  | RDR2-sensitive |
| AGGAGAGCACTGTGCAAGAGGACG   | 0  | 21  | RDR2-sensitive |
| AGGAGAGCGGGCAGTCACACTCAC   | 0  | 11  | RDR2-sensitive |
| AGGAGAGCTCTGTACCTTGGTCGG   | 0  | 13  | RDR2-sensitive |
| AGGAGAGGAACAGAAGACAAGCGC   | 0  | 9   | RDR2-sensitive |
| AGGAGAGGCAGAACGGCAGAACGG   | 0  | 16  | RDR2-sensitive |
| AGGAGAGGGCAGCAGATCACCGTT   | 0  | 11  | RDR2-sensitive |
| AGGAGATAGGCTGACGATCCTGAG   | 0  | 17  | RDR2-sensitive |
| AGGAGATAGTTGAGCGGCTGGAGA   | 0  | 16  | RDR2-sensitive |
| AGGAGATATCGAATTATGTCATGT   | 26 | 0   | RDR2-resistant |
| AGGAGATGGCGTAGCAACTAGC     | 0  | 11  | RDR2-sensitive |
| AGGAGATGGTGACCGCTGATTGAT   | 0  | 15  | RDR2-sensitive |
| AGGAGATGTAGTCACGCCTCGCAT   | 0  | 13  | RDR2-sensitive |
| AGGAGATGTGGTCCAGCTAGACGG   | 0  | 43  | RDR2-sensitive |
| AGGAGATTGCTCAGGCGTACTCAC   | 0  | 13  | RDR2-sensitive |
| AGGAGATTGTTGTATTTACTGTGA   | 0  | 9   | RDR2-sensitive |
| AGGAGCACCCCTGTCACTCGGTAC   | 1  | 31  | RDR2-sensitive |
| AGGAGCACTAGAGCTTGGAAAGGGC  | 1  | 13  | RDR2-sensitive |
| AGGAGCAGGAGAACGCCGAAGCCC   | 0  | 12  | RDR2-sensitive |
| AGGAGCAGTAGCAAACGTCGGCGC   | 0  | 9   | RDR2-sensitive |
| AGGAGCATCTGGAAGGACGGTCTG   | 1  | 41  | RDR2-sensitive |
| AGGAGCCAAGTAGAACGGAGCCGC   | 1  | 17  | RDR2-sensitive |
| AGGAGCCAAGTAGAACGGAGCCGT   | 13 | 123 | RDR2-sensitive |
| AGGAGCCAAGTAGAACGGAGTCAT   | 1  | 57  | RDR2-sensitive |
| AGGAGCCAAGTAGAACGGAGTCGT   | 4  | 292 | RDR2-sensitive |
| AGGAGCCAAGTAGAATGGAGTCGT   | 0  | 34  | RDR2-sensitive |
| AGGAGCCCGTAGAAGACACGCTAT   | 0  | 19  | RDR2-sensitive |
| AGGAGCCGGCGTACACTGTTAATG   | 0  | 10  | RDR2-sensitive |
| AGGAGCCGGTAGAAGCTTGTTTTTC  | 2  | 88  | RDR2-sensitive |
| AGGAGCCGGTGTGAGAACAGTTTT   | 0  | 12  | RDR2-sensitive |
| AGGAGCCTAGGACGACGGTGACGA   | 0  | 11  | RDR2-sensitive |
| AGGAGCCTGCATGTACAAAGCCAA   | 0  | 13  | RDR2-sensitive |
| AGGAGCGACTCTTCTCTGCACGGC   | 0  | 11  | RDR2-sensitive |
| AGGAGCGCATCGCCGGCAGAAAGGG  | 0  | 9   | RDR2-sensitive |
| AGGAGCGCTCGTGAACTTTATGGC   | 0  | 9   | RDR2-sensitive |
| AGGAGCGGCTCCTCCTCTGCATAC   | 0  | 10  | RDR2-sensitive |
| AGGAGCGGCTCCTCCTCTGCGTAC   | 0  | 13  | RDR2-sensitive |
| AGGAGCGGCTCCTTCTCTGCGTAC   | 0  | 16  | RDR2-sensitive |
| AGGAGCGGCTCCTTCTCTGTACAC   | 0  | 13  | RDR2-sensitive |
| AGGAGCGGCTCCTTCTCTGCGTCAC  | 0  | 18  | RDR2-sensitive |

|                           |     |    |                |
|---------------------------|-----|----|----------------|
| AGGAGCGGCTTCTCCTCTGCATAC  | 2   | 54 | RDR2-sensitive |
| AGGAGCGGGCAGGATTCCACGGTA  | 0   | 24 | RDR2-sensitive |
| AGGAGCGGTGCCTTCTCTGCGTAC  | 0   | 16 | RDR2-sensitive |
| AGGAGCGGTTCTTCTCTGCGTTT   | 0   | 10 | RDR2-sensitive |
| AGGAGCGTAGGCGTGCACACCCGT  | 0   | 13 | RDR2-sensitive |
| AGGAGCTAGAGCTGTGCCAAACGG  | 0   | 16 | RDR2-sensitive |
| AGGAGCTAGGAACATGCAAGACAG  | 0   | 9  | RDR2-sensitive |
| AGGAGCTGCAGTAGAAACCCGGAA  | 0   | 10 | RDR2-sensitive |
| AGGAGCTGGAGCTGTGCCAAACAG  | 0   | 16 | RDR2-sensitive |
| AGGAGCTGGAGCTGTGCCAAACGG  | 0   | 70 | RDR2-sensitive |
| AGGAGCTGGAGCTTTACCAAACGG  | 0   | 16 | RDR2-sensitive |
| AGGAGCTGGAGCTTTGCCAAACGG  | 1   | 22 | RDR2-sensitive |
| AGGAGCTGGGAATGAAAACGGAGT  | 0   | 15 | RDR2-sensitive |
| AGGAGCTGGTGTAGTGTACTGCAT  | 0   | 11 | RDR2-sensitive |
| AGGAGCTGGTTTCCCTACGCTGAG  | 0   | 9  | RDR2-sensitive |
| AGGAGCTGTTTTAAGGGAGGGTGG  | 0   | 15 | RDR2-sensitive |
| AGGAGGAACCGCTGAAGACAGTCT  | 0   | 9  | RDR2-sensitive |
| AGGAGGAAGGGCGACGTGATGTTT  | 24  | 0  | RDR2-resistant |
| AGGAGGACGCAGGATATGACGGAT  | 0   | 84 | RDR2-sensitive |
| AGGAGGACGCGGGATATGATGGAT  | 0   | 20 | RDR2-sensitive |
| AGGAGGAGGGATGAATAAGGCTGC  | 0   | 22 | RDR2-sensitive |
| AGGAGGATAGTGACCAGAGCCGGA  | 150 | 0  | RDR2-resistant |
| AGGAGGATGAAGCATTCGACGACT  | 14  | 0  | RDR2-resistant |
| AGGAGGCAGAACCGTGCACCACAG  | 0   | 10 | RDR2-sensitive |
| AGGAGGCAGACTACTATTACACTC  | 0   | 12 | RDR2-sensitive |
| AGGAGGCATCCTGTACGACGGCGG  | 18  | 1  | RDR2-resistant |
| AGGAGGCCAAGGATATGAACAGAA  | 35  | 4  | RDR2-resistant |
| AGGAGGCGAGATGTAGGTTTACTC  | 0   | 13 | RDR2-sensitive |
| AGGAGGCGCTGTAGGGGCACCGCT  | 3   | 41 | RDR2-sensitive |
| AGGAGGCGCTGTAGGGGGCACCGC  | 2   | 42 | RDR2-sensitive |
| AGGAGGCGGCGATTCTGGAGGCAC  | 1   | 22 | RDR2-sensitive |
| AGGAGGCGGCTGCAGCATCGACGT  | 0   | 10 | RDR2-sensitive |
| AGGAGGCTAGTAGGAACGGTCCAA  | 1   | 47 | RDR2-sensitive |
| AGGAGGGAAGGGAGCGGATCTGGT  | 0   | 10 | RDR2-sensitive |
| AGGAGGGAGAAGACCAACGGACAG  | 0   | 20 | RDR2-sensitive |
| AGGAGGGCAGAACGGCAGAACAGC  | 1   | 77 | RDR2-sensitive |
| AGGAGGGCTGTATTCCACGACGCA  | 0   | 9  | RDR2-sensitive |
| AGGAGGGGCACTAATTTTGACATT  | 15  | 0  | RDR2-resistant |
| AGGAGGTAGCAACAGAAAGACGGA  | 0   | 10 | RDR2-sensitive |
| AGGAGGTAGCGCGGGACGATGCGG  | 106 | 21 | RDR2-resistant |
| AGGAGGTGCTGCCACGAGGACGAT  | 28  | 0  | RDR2-resistant |
| AGGAGGTTGTAGGGGACGTTGCTG  | 0   | 16 | RDR2-sensitive |
| AGGAGTACGGTACCGCTGGCTCAT  | 3   | 25 | RDR2-sensitive |
| AGGAGTACGGTACTCATGTGCACA  | 0   | 9  | RDR2-sensitive |
| AGGAGTAGCAATGCAGAACGCCGA  | 0   | 11 | RDR2-sensitive |
| AGGAGTAGTAGAGATAGCGACCAG  | 0   | 13 | RDR2-sensitive |
| AGGAGTCGCTAGAGCTTTCTGTCGG | 2   | 48 | RDR2-sensitive |
| AGGAGTCGCTTGAGCTCTCGTCGG  | 4   | 18 | RDR2-sensitive |
| AGGAGTCGGTAGAAGCTTGTTTTC  | 1   | 58 | RDR2-sensitive |

|                           |    |     |                |
|---------------------------|----|-----|----------------|
| AGGAGTCTAGGTCGGCCTGCCTGA  | 0  | 10  | RDR2-sensitive |
| AGGAGTGAGAAGACGATGGACTAG  | 0  | 12  | RDR2-sensitive |
| AGGAGTGAGTCGAAGAGCGTCATG  | 41 | 0   | RDR2-resistant |
| AGGAGTGTGACGGCTCGCAAGAGC  | 15 | 0   | RDR2-resistant |
| AGGAGTGTTGACGGCCTGGTGAC   | 1  | 20  | RDR2-sensitive |
| AGGAGTTCAGGACTGTAGGGGCAG  | 0  | 11  | RDR2-sensitive |
| AGGAGTTGGGAATGGGAATGGCAG  | 0  | 9   | RDR2-sensitive |
| AGGAGTTGTGATGCATATGACTAT  | 27 | 3   | RDR2-resistant |
| AGGATAAGACATTGGCGACACCGT  | 0  | 16  | RDR2-sensitive |
| AGGATACAGGATGAGCTACTATCC  | 0  | 14  | RDR2-sensitive |
| AGGATACCCGATGGACGAAGACGA  | 0  | 21  | RDR2-sensitive |
| AGGATACCTGTAGTAGTGCGGCCT  | 0  | 32  | RDR2-sensitive |
| AGGATACCTGTAGTAGTGCGTCAG  | 0  | 23  | RDR2-sensitive |
| AGGATACGGGCAACACTTCTCACC  | 0  | 17  | RDR2-sensitive |
| AGGATAGAACGAGCGGCTGAGATC  | 0  | 11  | RDR2-sensitive |
| AGGATAGCGGTGTAAGTGTAGCCCC | 0  | 24  | RDR2-sensitive |
| AGGATAGGGCAGCCCCGGACGAGC  | 0  | 15  | RDR2-sensitive |
| AGGATAGTCCTGGTTAATTCTGGT  | 63 | 1   | RDR2-resistant |
| AGGATAGTGACCAGAGCCGGACGG  | 35 | 0   | RDR2-resistant |
| AGGATATAAGGCGTAACCACTCT   | 1  | 16  | RDR2-sensitive |
| AGGATATCTGTCGCTGGAGGGCAC  | 0  | 22  | RDR2-sensitive |
| AGGATATGATGTGTAGTCCGGAAA  | 16 | 0   | RDR2-resistant |
| AGGATATGGAAGCGGCAGAACCGT  | 0  | 27  | RDR2-sensitive |
| AGGATATGGATACACGTTCAATTGC | 0  | 12  | RDR2-sensitive |
| AGGATCAAATCGGATTAGGATCGG  | 0  | 14  | RDR2-sensitive |
| AGGATCAAGTCAAGTTAGGGCCGG  | 0  | 17  | RDR2-sensitive |
| AGGATCACAGGAGACTTCGTGGCC  | 0  | 37  | RDR2-sensitive |
| AGGATCACGTGCGGCCCCCGTCGG  | 0  | 9   | RDR2-sensitive |
| AGGATCAGGATCCTCGGAGCGCAT  | 1  | 42  | RDR2-sensitive |
| AGGATCAGGGGGAGCACATTTCTA  | 0  | 9   | RDR2-sensitive |
| AGGATCCAGATCCTCGGAGCGCAT  | 0  | 12  | RDR2-sensitive |
| AGGATCCCTGTAGTAGTGGCGATG  | 0  | 11  | RDR2-sensitive |
| AGGATCCCTGTTGGAAGGATGTTT  | 0  | 15  | RDR2-sensitive |
| AGGATCCTGACGAGTCGACGAGCT  | 0  | 19  | RDR2-sensitive |
| AGGATCCTGCAGACAACGTTGATA  | 0  | 9   | RDR2-sensitive |
| AGGATCGAAGCGGGTTAGGATCGG  | 0  | 20  | RDR2-sensitive |
| AGGATCGGAACACATACGGATCAA  | 0  | 24  | RDR2-sensitive |
| AGGATCGGAGATCTACGACGACTA  | 0  | 18  | RDR2-sensitive |
| AGGATCGGATAACTCCTCACGGTG  | 1  | 25  | RDR2-sensitive |
| AGGATCGGATCAAGTTAGGGCCGG  | 0  | 11  | RDR2-sensitive |
| AGGATCGGATGAAGACGAAGCTAG  | 0  | 13  | RDR2-sensitive |
| AGGATCGGGCTATATGGGTCGGCA  | 0  | 11  | RDR2-sensitive |
| AGGATCGGTAGACCACCCAAGACG  | 0  | 11  | RDR2-sensitive |
| AGGATCGTATGGTCGCGGGCGCAC  | 0  | 13  | RDR2-sensitive |
| AGGATCGTTTAGAGGACGCTGCTG  | 0  | 41  | RDR2-sensitive |
| AGGATCTAGAAAGTGACGGATTCC  | 6  | 33  | RDR2-sensitive |
| AGGATCTAGAAGACGAAGGGTTCC  | 31 | 134 | RDR2-sensitive |
| AGGATCTAGACGACTATTATAATA  | 70 | 1   | RDR2-resistant |
| AGGATCTAGATCCTCGGAGCGCAT  | 0  | 17  | RDR2-sensitive |

|                           |     |     |                |
|---------------------------|-----|-----|----------------|
| AGGATCTCTGTGCCCGAAGACCGG  | 0   | 28  | RDR2-sensitive |
| AGGATCTGAAGCGGTAGGGGGCTC  | 0   | 25  | RDR2-sensitive |
| AGGATCTGCATGCATGCATCTGCG  | 0   | 22  | RDR2-sensitive |
| AGGATCTGCGGTAGAAGCTGGAGC  | 0   | 10  | RDR2-sensitive |
| AGGATCTGGACCCGAAGCTCGGCG  | 0   | 11  | RDR2-sensitive |
| AGGATCTGGACTCGACGCTCGGCG  | 0   | 10  | RDR2-sensitive |
| AGGATCTGGAGCTAAAGAAGCAGG  | 0   | 12  | RDR2-sensitive |
| AGGATCTGGAGGAGCCGTGCCAAA  | 0   | 15  | RDR2-sensitive |
| AGGATCTGGATCATCAGAGCGCAT  | 9   | 266 | RDR2-sensitive |
| AGGATCTGGATCATCAGAGCGTAT  | 1   | 24  | RDR2-sensitive |
| AGGATCTGGATCATTAGAGCGCAT  | 0   | 9   | RDR2-sensitive |
| AGGATCTGGATCCTCAGAGCGCAT  | 0   | 9   | RDR2-sensitive |
| AGGATCTGGCTGACAGCAAGACTG  | 0   | 10  | RDR2-sensitive |
| AGGATCTGTCTGAAGGTATTTTCTT | 1   | 13  | RDR2-sensitive |
| AGGATCTTATCTCGCGGGCGCGCT  | 0   | 15  | RDR2-sensitive |
| AGGATCTTGTACGGCTGCGTCCGC  | 1   | 16  | RDR2-sensitive |
| AGGATGAAATAGGAGTGAGGGCAC  | 0   | 34  | RDR2-sensitive |
| AGGATGAAGGACTGACACGCGCAC  | 0   | 13  | RDR2-sensitive |
| AGGATGAAGGACTGCCACACGCGC  | 3   | 28  | RDR2-sensitive |
| AGGATGAAGGACTGCCACGCGCGC  | 0   | 9   | RDR2-sensitive |
| AGGATGAAGGACTGCCACGCGCGT  | 0   | 19  | RDR2-sensitive |
| AGGATGAAGGCGTGATAGGACCAG  | 0   | 11  | RDR2-sensitive |
| AGGATGAATATAGAGGACGTTGCT  | 0   | 18  | RDR2-sensitive |
| AGGATGACCAGTCTTGCTGCATA   | 50  | 0   | RDR2-resistant |
| AGGATGACGAACAAGGTGGCGACA  | 0   | 10  | RDR2-sensitive |
| AGGATGACGAGCGACCGATCGAGC  | 0   | 9   | RDR2-sensitive |
| AGGATGACGGGTTTCGACGACTTGA | 0   | 9   | RDR2-sensitive |
| AGGATGACTGGATGTAGGAAGGTT  | 0   | 10  | RDR2-sensitive |
| AGGATGACTGGTGACGCATGGTGC  | 0   | 27  | RDR2-sensitive |
| AGGATGAGACGAGCCTGCTCACGC  | 0   | 60  | RDR2-sensitive |
| AGGATGAGCTGAACCGTGTGCATT  | 0   | 10  | RDR2-sensitive |
| AGGATGAGGAGTAGCATGTGAAGT  | 164 | 0   | RDR2-resistant |
| AGGATGAGGATGACGGGTGACACA  | 0   | 15  | RDR2-sensitive |
| AGGATGATGGTACCACTTGCAGTG  | 21  | 0   | RDR2-resistant |
| AGGATGCTGTAGAGGGCACCGCTA  | 0   | 15  | RDR2-sensitive |
| AGGATGGAACAGAGCCGAAGTTGT  | 0   | 12  | RDR2-sensitive |
| AGGATGGAATCGCAATCGGACGGT  | 0   | 16  | RDR2-sensitive |
| AGGATGGACGATCACGGTGGAGGA  | 15  | 0   | RDR2-resistant |
| AGGATGGATATAGAGGACGTTGCT  | 0   | 11  | RDR2-sensitive |
| AGGATGGATGTAATTCGTACCGGC  | 0   | 9   | RDR2-sensitive |
| AGGATGGCAGAACGGCAGAACGGC  | 3   | 213 | RDR2-sensitive |
| AGGATGGCAGAACGGCAGACTACT  | 0   | 13  | RDR2-sensitive |
| AGGATGGGAATTTGGTGGGGGCGA  | 0   | 10  | RDR2-sensitive |
| AGGATGGGCCGCAGGAAGAGAAAG  | 30  | 0   | RDR2-resistant |
| AGGATGGGCTGAGCAACTGGCATG  | 0   | 12  | RDR2-sensitive |
| AGGATGGGCTGTAGAATGGGCCGC  | 0   | 26  | RDR2-sensitive |
| AGGATGGGTATGAGGATGGATCAA  | 0   | 12  | RDR2-sensitive |
| AGGATGTAGAAAGTCACGACTGCA  | 47  | 0   | RDR2-resistant |
| AGGATGTAGATGAGGCGCTGCTGT  | 0   | 11  | RDR2-sensitive |



|                            |    |     |                |
|----------------------------|----|-----|----------------|
| AGGATGTAGATTTAGGCATTTGAT   | 0  | 31  | RDR2-sensitive |
| AGGATGTAGCAAACCAGAAGGCAC   | 0  | 11  | RDR2-sensitive |
| AGGATGTATATAGAGGACGTTGCT   | 1  | 57  | RDR2-sensitive |
| AGGATGTCGGGCAGAACACGGTGC   | 0  | 125 | RDR2-sensitive |
| AGGATGTCGGGTGGAAGGCAGAAC   | 0  | 73  | RDR2-sensitive |
| AGGATGTGAGAACATGGGAGATGC   | 23 | 1   | RDR2-resistant |
| AGGATGTGCTAGATTCGGCTTCTT   | 38 | 6   | RDR2-resistant |
| AGGATGTGGACGCCTACACTACCA   | 0  | 12  | RDR2-sensitive |
| AGGATGTGTTATTACGAAAACGGT   | 0  | 14  | RDR2-sensitive |
| AGGATGTTGTACTAGATAGGCATG   | 47 | 0   | RDR2-resistant |
| AGGATTACGTGCGGAGGAAGATAA   | 9  | 31  | RDR2-sensitive |
| AGGATTACTACTTGCCGGACGCGC   | 1  | 17  | RDR2-sensitive |
| AGGATTAGCAATTCTGGGAGACGT   | 0  | 11  | RDR2-sensitive |
| AGGATTAGCAATTCTGGGGGACGT   | 0  | 13  | RDR2-sensitive |
| AGGATTAGGACCTCGTTAGGCGTC   | 0  | 21  | RDR2-sensitive |
| AGGATTAGGACGGGTGCACTCCGC   | 0  | 29  | RDR2-sensitive |
| AGGATTCACCAGCAGAGCAATTTA   | 17 | 1   | RDR2-resistant |
| AGGATTCAGTGAATCCGGTCCGTT   | 0  | 14  | RDR2-sensitive |
| AGGATTCCACGGTACCGAGCAGGC   | 0  | 12  | RDR2-sensitive |
| AGGATTCCTGTAGTGTGGCACGG    | 1  | 67  | RDR2-sensitive |
| AGGATTCGACAAGTAGGCGCTAGC   | 0  | 15  | RDR2-sensitive |
| AGGATTCGACTTTTGACCCGGCCC   | 0  | 10  | RDR2-sensitive |
| AGGATTCTCTACAGTGA CT CGCAT | 1  | 24  | RDR2-sensitive |
| AGGATTGAAAGGGACTGAGGAGGA   | 0  | 10  | RDR2-sensitive |
| AGGATTGACAGACATCGAGGGTAT   | 0  | 20  | RDR2-sensitive |
| AGGATTGCAGGAAGGAAGCAAGAC   | 0  | 11  | RDR2-sensitive |
| AGGATTGCATGCAGACTGGGCGGT   | 0  | 15  | RDR2-sensitive |
| AGGATTGCATGCAGACTGGGGCCG   | 0  | 17  | RDR2-sensitive |
| AGGATTGCATGTAGACCGGGCGGT   | 0  | 13  | RDR2-sensitive |
| AGGATTGCCTAGCGACGACGTCTG   | 0  | 12  | RDR2-sensitive |
| AGGATTGCGGGCTTACGGATGGAA   | 0  | 10  | RDR2-sensitive |
| AGGATTGCTGCTTGATGGTTGGAT   | 0  | 37  | RDR2-sensitive |
| AGGATTGCTGTACCATCGAGGCCA   | 0  | 13  | RDR2-sensitive |
| AGGATTGCTTGCTACAGAAGTATC   | 17 | 1   | RDR2-resistant |
| AGGATTGGAGGGGATTGAGGGGGA   | 0  | 13  | RDR2-sensitive |
| AGGATTGGATTCGGAGGGGACGAC   | 0  | 20  | RDR2-sensitive |
| AGGATTGGCTCTGAGGGTTGGGCT   | 30 | 5   | RDR2-resistant |
| AGGATTGGGACAGTACTATCTAGT   | 0  | 11  | RDR2-sensitive |
| AGGATTGGGAGTAGAAGCGAGGGC   | 0  | 9   | RDR2-sensitive |
| AGGATTGGGCACCTAAGAAGGAAC   | 0  | 11  | RDR2-sensitive |
| AGGATTGGGGACGCTTCACGCGAC   | 0  | 10  | RDR2-sensitive |
| AGGATTGGGTGTGAAGTACGGATT   | 0  | 12  | RDR2-sensitive |
| AGGATTGGTAGGAGCTACGTTCCC   | 1  | 72  | RDR2-sensitive |
| AGGATTGGTAGGAGCTACGTTTCC   | 0  | 11  | RDR2-sensitive |
| AGGATTGGTGGAGACGTAGACCGC   | 0  | 9   | RDR2-sensitive |
| AGGATTGGTGGCAGAACACGGAAT   | 0  | 12  | RDR2-sensitive |
| AGGATTGTAGCAAACCAAGCGGC    | 42 | 4   | RDR2-resistant |
| AGGATTGTGCGGCAGAACATGGCG   | 0  | 13  | RDR2-sensitive |
| AGGATTGTGGTATAGAGTAAAGAA   | 0  | 9   | RDR2-sensitive |

|                          |     |     |                |
|--------------------------|-----|-----|----------------|
| AGGATTGTGGTATAGAGTAGATAA | 1   | 15  | RDR2-sensitive |
| AGGATTGTTGGCTAGTTTAATGGC | 167 | 57  | RDR2-resistant |
| AGGATTTAAGGCGGGTGCCTCCG  | 0   | 10  | RDR2-sensitive |
| AGGATTTAGAAAGTGACGGATTCC | 0   | 9   | RDR2-sensitive |
| AGGATTTAGAGCGGGTGCCTCCG  | 0   | 26  | RDR2-sensitive |
| AGGATTTAGCGACTGACCGACGGT | 1   | 13  | RDR2-sensitive |
| AGGATTTAGCGACTGACCGTCGGT | 1   | 76  | RDR2-sensitive |
| AGGATTTAGGACGGGTGCCTCCG  | 0   | 9   | RDR2-sensitive |
| AGGATTTAGGGCGGGTACCTCCG  | 0   | 9   | RDR2-sensitive |
| AGGATTTAGGGCGGGTGCAATCCG | 0   | 15  | RDR2-sensitive |
| AGGATTTAGGGCGGGTGCCTCCG  | 5   | 149 | RDR2-sensitive |
| AGGATTTAGGGCGGGTGCAATCCA | 0   | 14  | RDR2-sensitive |
| AGGATTTAGGGCGGGTGCAATCCG | 1   | 53  | RDR2-sensitive |
| AGGATTTCTAGACGACGCACGGAA | 0   | 12  | RDR2-sensitive |
| AGGATTTCTTGCTGACGTATGGAA | 0   | 10  | RDR2-sensitive |
| AGGATTTGAACATGCTGGATTCCG | 2   | 29  | RDR2-sensitive |
| AGGATTTGAACTCTCAGCTTGCGG | 0   | 9   | RDR2-sensitive |
| AGGATTTGGCATACTCTAAGCT   | 0   | 14  | RDR2-sensitive |
| AGGATTTGGGGCTGGACGCGACGG | 0   | 9   | RDR2-sensitive |
| AGGATTTGTTTTACTGAGGTTCCG | 0   | 10  | RDR2-sensitive |
| AGGATTTTCCGACTCCGACGGTAA | 0   | 22  | RDR2-sensitive |
| AGGATTTTGACTTGTAGGGGATTT | 0   | 16  | RDR2-sensitive |
| AGGCAAAGACCTTGGACTTCCA   | 0   | 9   | RDR2-sensitive |
| AGGCAAACCGACGTCTGACATCAT | 0   | 20  | RDR2-sensitive |
| AGGCAAACCTCGGGCGCGAGACGT | 0   | 13  | RDR2-sensitive |
| AGGCAAAGCGGGCAGGGACACCCT | 0   | 10  | RDR2-sensitive |
| AGGCAAAGTGTGGCAACTGAGGTA | 3   | 48  | RDR2-sensitive |
| AGGCAACAGAGAACATACCCACGC | 0   | 17  | RDR2-sensitive |
| AGGCAACAGTGTAGGCAGCTGGCT | 0   | 10  | RDR2-sensitive |
| AGGCAACCTGGGAACCGGTAAAGC | 0   | 47  | RDR2-sensitive |
| AGGCAACGGAACGTGTGATGGTTT | 19  | 0   | RDR2-resistant |
| AGGCAACTGGAACACATACGGTAA | 0   | 12  | RDR2-sensitive |
| AGGCAAGAGGTATGACGCGGACAC | 0   | 34  | RDR2-sensitive |
| AGGCAAGCGTTGGACTTGGCCGAA | 0   | 12  | RDR2-sensitive |
| AGGCAATCGGCAAAGACGGAACCT | 0   | 9   | RDR2-sensitive |
| AGGCAATTCTGAAATTTGGACATC | 1   | 13  | RDR2-sensitive |
| AGGCAATTCTGAGATTTGGACATC | 0   | 18  | RDR2-sensitive |
| AGGCACACAGGACTGTGCAGGCGC | 0   | 20  | RDR2-sensitive |
| AGGCACAGGCGTAGAGTATAACAG | 0   | 12  | RDR2-sensitive |
| AGGCACAGGCGTAGAGTATAGCAG | 0   | 15  | RDR2-sensitive |
| AGGCACATGATGCAATCTGCGCAA | 0   | 9   | RDR2-sensitive |
| AGGCACCAGTGGCTCCATTCACAC | 2   | 14  | RDR2-sensitive |
| AGGCACGACGTGGTTTATGGCTGA | 0   | 9   | RDR2-sensitive |
| AGGCACGATCGCAGTAGAAGATGA | 0   | 13  | RDR2-sensitive |
| AGGCACGCAGGACTGTGCAGGCAC | 0   | 344 | RDR2-sensitive |
| AGGCACGCAGGACTGTGCAGGCC  | 0   | 19  | RDR2-sensitive |
| AGGCACGCAGGACTGTGTAGGCC  | 0   | 16  | RDR2-sensitive |
| AGGCACGGACGCACGGTACCACTC | 0   | 17  | RDR2-sensitive |
| AGGCACGGCACGGTTAGGACACGG | 0   | 13  | RDR2-sensitive |

|                           |    |     |                |
|---------------------------|----|-----|----------------|
| AGGCACGGTAGAAAACCAGGTCGG  | 0  | 12  | RDR2-sensitive |
| AGGCACGGTGAGCTAACTCGGCAT  | 2  | 48  | RDR2-sensitive |
| AGGCACGTAGGACTGTGCAGGCC   | 3  | 158 | RDR2-sensitive |
| AGGCACGTGGGCTCTCTAGGCATG  | 0  | 30  | RDR2-sensitive |
| AGGCACGTTAGAATGGACGGAGAC  | 0  | 12  | RDR2-sensitive |
| AGGCACTACGTAGGATTCATCGGC  | 0  | 10  | RDR2-sensitive |
| AGGCACTAGGGCTAGGGTTTTCAA  | 0  | 17  | RDR2-sensitive |
| AGGCACTATTGCGCTCTCCAGCAG  | 0  | 30  | RDR2-sensitive |
| AGGCACTCGACAAAGGGACTGGCA  | 0  | 11  | RDR2-sensitive |
| AGGCACTCGAGTGATCGTCTGTTC  | 0  | 11  | RDR2-sensitive |
| AGGCACTCGCAAAGAATACAACA   | 0  | 13  | RDR2-sensitive |
| AGGCACTCGCAAAGAGACTGGCA   | 0  | 14  | RDR2-sensitive |
| AGGCACTCGCAAAGATACTGGCA   | 0  | 39  | RDR2-sensitive |
| AGGCACTCGCAAAGCCTCGGATT   | 0  | 12  | RDR2-sensitive |
| AGGCACTCGCAAAGCGTCCGGCA   | 0  | 9   | RDR2-sensitive |
| AGGCACTCGCAAAGGGACTGGCA   | 1  | 18  | RDR2-sensitive |
| AGGCACTGAAGACACCGAGGAGGA  | 0  | 42  | RDR2-sensitive |
| AGGCACTGAAGACTCGAGGAGGAA  | 0  | 10  | RDR2-sensitive |
| AGGCACTGACACTATACTGACCGG  | 0  | 24  | RDR2-sensitive |
| AGGCACTGAGGAGCCCCGACGGGT  | 0  | 12  | RDR2-sensitive |
| AGGCACTGATGGTTGTTTTGTAT   | 14 | 0   | RDR2-resistant |
| AGGCACTGCATGTGGATCCTTGA   | 54 | 8   | RDR2-resistant |
| AGGCACTGGCACTATACTAACCGG  | 1  | 32  | RDR2-sensitive |
| AGGCACTGGGAECTATGGAGGCAT  | 0  | 89  | RDR2-sensitive |
| AGGCACTGTAGCACAAATCCAGCAG | 0  | 21  | RDR2-sensitive |
| AGGCACTGTGACGCCCTAAGCCGG  | 0  | 13  | RDR2-sensitive |
| AGGCACTGTGGGCTAGCCCCGGCAC | 2  | 21  | RDR2-sensitive |
| AGGCACTGTTGCGCGCTCCAGCAG  | 0  | 9   | RDR2-sensitive |
| AGGCACTGTTGGAGTGGTTTTTCC  | 0  | 9   | RDR2-sensitive |
| AGGCACTGTTTCGCTCTCCAGCAG  | 0  | 52  | RDR2-sensitive |
| AGGCACTTGTGTTGGACACTTAAT  | 0  | 14  | RDR2-sensitive |
| AGGCAGAACAGCCGTTGGCAGAAC  | 0  | 13  | RDR2-sensitive |
| AGGCAGAACAGGGAGGCAGCCTA   | 0  | 10  | RDR2-sensitive |
| AGGCAGAACAGGGGAGGCAGCCT   | 0  | 16  | RDR2-sensitive |
| AGGCAGAACGATAGACTACCCTTA  | 0  | 15  | RDR2-sensitive |
| AGGCAGAACGATGGCACATGTGCA  | 0  | 20  | RDR2-sensitive |
| AGGCAGAACGCAGAACAGGAGGGG  | 0  | 11  | RDR2-sensitive |
| AGGCAGAACGGTAGAACAGAGAG   | 0  | 11  | RDR2-sensitive |
| AGGCAGAACGGTAGAACGGCAGAA  | 0  | 22  | RDR2-sensitive |
| AGGCAGAACGGTAGACTACCCTTA  | 0  | 14  | RDR2-sensitive |
| AGGCAGAACGGGTAGAACAGGCCG  | 0  | 10  | RDR2-sensitive |
| AGGCAGACGGGGCTTTGGCAGAA   | 0  | 13  | RDR2-sensitive |
| AGGCAGACTTCTCGTGAGCGACGC  | 0  | 15  | RDR2-sensitive |
| AGGCAGATAGACGAAGCCTTGAA   | 1  | 17  | RDR2-sensitive |
| AGGCAGATCTCATAGGGACAGGGC  | 1  | 12  | RDR2-sensitive |
| AGGCAGATCTGGGTCGGGCTTCAA  | 0  | 10  | RDR2-sensitive |
| AGGCAGATGGACCGATTTGTTACC  | 19 | 0   | RDR2-resistant |
| AGGCAGATTGGCCGCTCTCAACAG  | 3  | 40  | RDR2-sensitive |
| AGGCAGATTGTGGCGACTTAGGTA  | 0  | 16  | RDR2-sensitive |

|                           |    |     |                |
|---------------------------|----|-----|----------------|
| AGGCAGATTGTGGCGCCTTAGGTA  | 0  | 12  | RDR2-sensitive |
| AGGCAGATTGTGGCGTCTTAGGTA  | 0  | 18  | RDR2-sensitive |
| AGGCAGCAACGGCAATGTGGGCTC  | 0  | 18  | RDR2-sensitive |
| AGGCAGCACCGGCGTAGAGCACTT  | 0  | 12  | RDR2-sensitive |
| AGGCAGCAGCGGCAATGTAGGCTC  | 1  | 44  | RDR2-sensitive |
| AGGCAGCAGCGGCAATGTGGGCTC  | 0  | 21  | RDR2-sensitive |
| AGGCAGGACAGAGGACTACCGCTC  | 0  | 10  | RDR2-sensitive |
| AGGCAGGACAGCCCCAGAACACGA  | 0  | 10  | RDR2-sensitive |
| AGGCAGGACCGTACTTTAGACCAC  | 0  | 24  | RDR2-sensitive |
| AGGCAGGATGTAGCGTATGACTGG  | 0  | 9   | RDR2-sensitive |
| AGGCAGGCAGAGTAGGAGAGACGC  | 0  | 9   | RDR2-sensitive |
| AGGCAGGCTCGGCTTGGCTCGCTC  | 0  | 10  | RDR2-sensitive |
| AGGCAGGCTGTGGCACCTTCGGCA  | 1  | 41  | RDR2-sensitive |
| AGGCAGGGAACAAGTTTGGGACGC  | 0  | 13  | RDR2-sensitive |
| AGGCAGGGAGTAGACGACATTGCT  | 0  | 10  | RDR2-sensitive |
| AGGCAGGGATGTGATCGATGGCAC  | 0  | 9   | RDR2-sensitive |
| AGGCAGGTGAATATACGAACGCAC  | 0  | 10  | RDR2-sensitive |
| AGGCAGTAAGGGGTAGGCTGTCAT  | 0  | 9   | RDR2-sensitive |
| AGGCAGTAGAGAACATCCTCGTCC  | 0  | 10  | RDR2-sensitive |
| AGGCAGTAGAGTGATGCGATGCAC  | 0  | 24  | RDR2-sensitive |
| AGGCAGTTCGAGTCGGACGGTCAG  | 0  | 40  | RDR2-sensitive |
| AGGCATAACTGGGGACGACACTGG  | 0  | 10  | RDR2-sensitive |
| AGGCATCACGTAGGGACCGACATC  | 0  | 11  | RDR2-sensitive |
| AGGCATCACGTAGGGACTGGCATC  | 0  | 11  | RDR2-sensitive |
| AGGCATCACGTAGGGACTGGCGTC  | 0  | 110 | RDR2-sensitive |
| AGGCATCAGTGGCTCCATTACACAC | 0  | 10  | RDR2-sensitive |
| AGGCATCTTCGGACTCAAGTCGGT  | 0  | 32  | RDR2-sensitive |
| AGGCATGATGTAGCAAGTGTGGAC  | 0  | 26  | RDR2-sensitive |
| AGGCATGCCCCATTTTCGTCGGTA  | 0  | 14  | RDR2-sensitive |
| AGGCATGCTCGGCTACTCCAGTCC  | 41 | 0   | RDR2-resistant |
| AGGCATGGACGGTCTACGGCTCAA  | 0  | 9   | RDR2-sensitive |
| AGGCATGGGGTAGGCACTCGGCAA  | 0  | 9   | RDR2-sensitive |
| AGGCATGTAGGACTGTGCAGGCC   | 0  | 28  | RDR2-sensitive |
| AGGCATTATGACGGAGCCGAACGC  | 0  | 11  | RDR2-sensitive |
| AGGCATTTCGTAGCTCGGCGCCAAG | 2  | 34  | RDR2-sensitive |
| AGGCATTGTCCAGTTCTCGTCGTG  | 0  | 12  | RDR2-sensitive |
| AGGCATTTTGCTTGTTAGTCGGGA  | 0  | 9   | RDR2-sensitive |
| AGGCCAACATCGGGCGGGAGACGC  | 0  | 18  | RDR2-sensitive |
| AGGCCAACCTCGGACGGGAGACGC  | 0  | 47  | RDR2-sensitive |
| AGGCCAACGGACAGTAGCGGTCAC  | 0  | 20  | RDR2-sensitive |
| AGGCCAATTTTCGGACACGAGACGC | 0  | 9   | RDR2-sensitive |
| AGGCCACACTCGGACGGGAGGCAC  | 0  | 15  | RDR2-sensitive |
| AGGCCACAGGTAAAACCGGACGAC  | 0  | 21  | RDR2-sensitive |
| AGGCCACTCTCGGGACTCGACGGC  | 0  | 10  | RDR2-sensitive |
| AGGCCAGAAGATTCCTGCAGGTTT  | 17 | 0   | RDR2-resistant |
| AGGCCAGGTAGAGCGGTTGGTTTT  | 0  | 82  | RDR2-sensitive |
| AGGCCATAGACCAGAGGACAGACC  | 0  | 16  | RDR2-sensitive |
| AGGCCATAGGATCGGACACCTAAG  | 0  | 12  | RDR2-sensitive |
| AGGCCATAGTAGTGGCACGTCGGC  | 1  | 36  | RDR2-sensitive |

|                           |     |    |                |
|---------------------------|-----|----|----------------|
| AGGCCATCCTCGGGCGGGAGACGC  | 0   | 10 | RDR2-sensitive |
| AGGCCATCGTATTCTCGGACCCGG  | 0   | 10 | RDR2-sensitive |
| AGGCCATGAACGAGACCCAGGCAC  | 0   | 11 | RDR2-sensitive |
| AGGCCATGATGGAAGTACGTGGC   | 0   | 11 | RDR2-sensitive |
| AGGCCATGCTCGGACGAGGCGGAG  | 0   | 9  | RDR2-sensitive |
| AGGCCATGTCGGCGAGCAGAGCGA  | 0   | 14 | RDR2-sensitive |
| AGGCCAACGAACTCGAGCGGCAC   | 0   | 9  | RDR2-sensitive |
| AGGCCAAGAGGAATCTTTGCATC   | 0   | 9  | RDR2-sensitive |
| AGGCCCGCAGGGACTGGACTCGG   | 1   | 13 | RDR2-sensitive |
| AGGCCCGCTGTATGCATTGACCGT  | 0   | 9  | RDR2-sensitive |
| AGGCCCGGACAAGAACTAGGCAC   | 0   | 9  | RDR2-sensitive |
| AGGCCCGGATGACTCCAGAAGCAG  | 0   | 31 | RDR2-sensitive |
| AGGCCCGTTCGGACCATGGACCGGC | 0   | 18 | RDR2-sensitive |
| AGGCCCGTGGGCCGTCGGACGACA  | 340 | 0  | RDR2-resistant |
| AGGCCGAAGCGACCATAAACTCTA  | 0   | 14 | RDR2-sensitive |
| AGGCCGACACGTAGAGGGCGCTGT  | 0   | 20 | RDR2-sensitive |
| AGGCCGACGAGAATCCGGACTTC   | 0   | 9  | RDR2-sensitive |
| AGGCCGACGGCGATTAAGTAACTC  | 0   | 10 | RDR2-sensitive |
| AGGCCGACGGCTGTTAGACGGGCC  | 1   | 12 | RDR2-sensitive |
| AGGCCGAGAAGACGAATGAGACGT  | 0   | 9  | RDR2-sensitive |
| AGGCCGCTCTTGGGACTCGACGGC  | 0   | 9  | RDR2-sensitive |
| AGGCCGGGAAGACGAACAGGACGT  | 1   | 13 | RDR2-sensitive |
| AGGCCGGGAAGACGAACGGGACGT  | 2   | 15 | RDR2-sensitive |
| AGGCCGGCCTGTACGTGAAGCAT   | 0   | 11 | RDR2-sensitive |
| AGGCCGGGCTAGGTAGAGCGAGGC  | 2   | 33 | RDR2-sensitive |
| AGGCCGTCAACGAACGAGGACAGC  | 0   | 11 | RDR2-sensitive |
| AGGCCGTCGACGTGTCATTGGCAA  | 0   | 11 | RDR2-sensitive |
| AGGCCGTGCGTTATACGGAGTCGG  | 0   | 32 | RDR2-sensitive |
| AGGCCGTGCTGCACTGTATGTCGT  | 0   | 10 | RDR2-sensitive |
| AGGCCGTGGAGCAATGTAAGACGT  | 0   | 20 | RDR2-sensitive |
| AGGCCGTTTTAGCAACCAACCGTA  | 0   | 11 | RDR2-sensitive |
| AGGCCTATAGCAGGTTCGGCTCGGA | 0   | 12 | RDR2-sensitive |
| AGGCCTATTTCTGTAGTCTATCGG  | 183 | 0  | RDR2-resistant |
| AGGCCTCAAATTCTGACCCGTCGG  | 0   | 10 | RDR2-sensitive |
| AGGCCTCCCGCAAGACGTGACTG   | 0   | 12 | RDR2-sensitive |
| AGGCCTCGAGCGAAGGGTGGCGTC  | 0   | 11 | RDR2-sensitive |
| AGGCCTCGGGCGAGCCGGTGATGT  | 0   | 17 | RDR2-sensitive |
| AGGCCTGAAGTGGACATATGGCAT  | 0   | 9  | RDR2-sensitive |
| AGGCCTGATATTGCTCATGCGTT   | 21  | 0  | RDR2-resistant |
| AGGCCTGATCTCGCTCGTCGCGAC  | 0   | 19 | RDR2-sensitive |
| AGGCCTGCAGGAAGCTTGAGACGA  | 0   | 27 | RDR2-sensitive |
| AGGCCTGGACGGCTACTGTAGCCC  | 1   | 20 | RDR2-sensitive |
| AGGCCTGGGTATTGAAGTCGGTGG  | 0   | 13 | RDR2-sensitive |
| AGGCCTGTAGCTAGCTAGAAGTGG  | 1   | 27 | RDR2-sensitive |
| AGGCCTGTGACGTGCCGGACCAAG  | 0   | 11 | RDR2-sensitive |
| AGGCCTGTGGATTCTGTTGCGGGAC | 49  | 6  | RDR2-resistant |
| AGGCCTGTGGCATGCACACTAGTT  | 110 | 7  | RDR2-resistant |
| AGGCCTTAAATTCCGGCCCGTCGG  | 2   | 24 | RDR2-sensitive |
| AGGCCTTAGACTATATTCAACGGT  | 0   | 12 | RDR2-sensitive |

|                           |     |    |                |
|---------------------------|-----|----|----------------|
| AGGCCTTAGTTGACGGTAGGATCG  | 0   | 42 | RDR2-sensitive |
| AGGCCTTGTTTCGTTTACGTCCGAT | 64  | 88 | RDR2-sensitive |
| AGGCCTTGTTTCGTTTCTGTCCGAT | 111 | 43 | RDR2-resistant |
| AGGCCTTGTTGGACGGGTTGGCGT  | 0   | 36 | RDR2-sensitive |
| AGGCCTTGTTGGTTTACGTCCGAT  | 0   | 11 | RDR2-sensitive |
| AGGCCTTTCGGACGGTCGGATGCT  | 0   | 18 | RDR2-sensitive |
| AGGCGAACGGACAGTAACGGTCAC  | 1   | 13 | RDR2-sensitive |
| AGGCGAAGGACAGTCAACGGACGA  | 0   | 13 | RDR2-sensitive |
| AGGCGAATTTTGGGCGGAGAACGT  | 0   | 11 | RDR2-sensitive |
| AGGCGACCTGGAATTGGGGACGA   | 1   | 14 | RDR2-sensitive |
| AGGCGAGACGAGCTTATTCTCTGG  | 1   | 12 | RDR2-sensitive |
| AGGCGAGACGGAAGTGCATCTCCT  | 0   | 13 | RDR2-sensitive |
| AGGCGAGACGGAAGTTCATCTCCT  | 0   | 19 | RDR2-sensitive |
| AGGCGAGAGTGGAGGCGAGAGCTG  | 1   | 36 | RDR2-sensitive |
| AGGCGAGTCTGTGGTTTTGATGGA  | 0   | 10 | RDR2-sensitive |
| AGGCGATAGACTGTTTCATGATGGT | 1   | 18 | RDR2-sensitive |
| AGGCGATCAGGATTGGTGACGGGC  | 0   | 12 | RDR2-sensitive |
| AGGCGATTTTCGGCGACGACGAACT | 0   | 10 | RDR2-sensitive |
| AGGCGCAAGATGCAACCCGGACAC  | 0   | 12 | RDR2-sensitive |
| AGGCGCACGATAGAATACGGACGG  | 0   | 10 | RDR2-sensitive |
| AGGCGCAGACTGTTTCGGACCGCGG | 0   | 11 | RDR2-sensitive |
| AGGCGCATGTAGCGACGGAAGCAC  | 0   | 11 | RDR2-sensitive |
| AGGCGCCAACGAACTCAGATGGTG  | 1   | 30 | RDR2-sensitive |
| AGGCGCCGAGCTCTGACATGGCGT  | 7   | 79 | RDR2-sensitive |
| AGGCGCGGACTGTCCGGACCGCGG  | 0   | 16 | RDR2-sensitive |
| AGGCGCGGGACATGGAGAGGACGA  | 0   | 12 | RDR2-sensitive |
| AGGCGCTGTAGGGGGCACCGCTGC  | 0   | 9  | RDR2-sensitive |
| AGGCGCTTCGAACTACAACCGGTT  | 0   | 13 | RDR2-sensitive |
| AGGCGGAACGACGGACCAGATCCC  | 0   | 9  | RDR2-sensitive |
| AGGCGGAACTGACACAGGCGGAAC  | 0   | 19 | RDR2-sensitive |
| AGGCGGAACTGCAGGAGCACGTGC  | 0   | 12 | RDR2-sensitive |
| AGGCGGACGAGCACGGACGAGCAG  | 0   | 12 | RDR2-sensitive |
| AGGCGGACTTGGATCGTGCCTCAA  | 0   | 15 | RDR2-sensitive |
| AGGCGGATTAAGGCATCCTGGCCG  | 50  | 1  | RDR2-resistant |
| AGGCGGCAGTCCTGAAAGTCTGGG  | 0   | 9  | RDR2-sensitive |
| AGGCGGCATGCAGGACAGACGGCG  | 0   | 13 | RDR2-sensitive |
| AGGCGGGACGGACGACCAACCTGC  | 0   | 30 | RDR2-sensitive |
| AGGCGGGCACTCAGGAGTTCAGGC  | 18  | 1  | RDR2-resistant |
| AGGCGGGCGCGGCAGAACGTGCGA  | 0   | 49 | RDR2-sensitive |
| AGGCGGGCTGGGCAGCAGCTAGGA  | 283 | 29 | RDR2-resistant |
| AGGCGGGCTTGGGACAGGCCTCAA  | 0   | 14 | RDR2-sensitive |
| AGGCGGGTCTGAACCGGGCCTCAA  | 0   | 10 | RDR2-sensitive |
| AGGCGGGTTGGAAATCGGACGGTT  | 0   | 9  | RDR2-sensitive |
| AGGCGGGTTGGGCATTGACTGCAA  | 0   | 11 | RDR2-sensitive |
| AGGCGTACAGGACCTGACCGTCCC  | 0   | 13 | RDR2-sensitive |
| AGGCGTAGACGAGGGCTTCGACAT  | 0   | 10 | RDR2-sensitive |
| AGGCGTAGGGGACCTGACCGTCTC  | 0   | 10 | RDR2-sensitive |
| AGGCGTCTTGAGGGTACCCCTAAT  | 1   | 17 | RDR2-sensitive |
| AGGCGTGAATTCTGTGGACGCGGA  | 0   | 10 | RDR2-sensitive |

|                           |   |     |                |
|---------------------------|---|-----|----------------|
| AGGCGTGGAACAGGTATTGTAGTC  | 0 | 12  | RDR2-sensitive |
| AGGCGTGGACTGTCCGGACCGCGG  | 1 | 22  | RDR2-sensitive |
| AGGCGTGGATACGGAGGTGCGCAT  | 0 | 9   | RDR2-sensitive |
| AGGCGTTAAGACTGAGATGGCTTT  | 0 | 13  | RDR2-sensitive |
| AGGCTAAACTCGGGCGGGAGACGC  | 0 | 9   | RDR2-sensitive |
| AGGCTAAACTGTTCGCGATGGCGT  | 0 | 29  | RDR2-sensitive |
| AGGCTAACGGACTGGCATGGCAGA  | 0 | 19  | RDR2-sensitive |
| AGGCTAATCCAACAGACTCGGTAA  | 0 | 17  | RDR2-sensitive |
| AGGCTAATGTGGACGGCAAGCTG   | 0 | 10  | RDR2-sensitive |
| AGGCTACAGGGAACAAGACCGGCG  | 1 | 14  | RDR2-sensitive |
| AGGCTACAGTTACAACCGTCGAA   | 0 | 50  | RDR2-sensitive |
| AGGCTACGAAGGAACAAGACCGGT  | 2 | 16  | RDR2-sensitive |
| AGGCTACGATCTCGACGAGCGAAG  | 0 | 11  | RDR2-sensitive |
| AGGCTACGGCTACCGTCGGAACAG  | 1 | 12  | RDR2-sensitive |
| AGGCTACGGGGAACAAGACCGGCG  | 1 | 35  | RDR2-sensitive |
| AGGCTAGCCTCGGGCAAAGATGT   | 0 | 13  | RDR2-sensitive |
| AGGCTAGCTTCGGGCGAGATGCAT  | 2 | 18  | RDR2-sensitive |
| AGGCTAGGAGACTCGCTTGACGC   | 0 | 9   | RDR2-sensitive |
| AGGCTAGGGTTCCTGTCTGACGGC  | 0 | 14  | RDR2-sensitive |
| AGGCTATATAGGATCTGAAGCGGT  | 0 | 13  | RDR2-sensitive |
| AGGCTATCTGCAGTGACGAACGGT  | 0 | 11  | RDR2-sensitive |
| AGGCTATGGTTCCTGTCTGACGGC  | 0 | 13  | RDR2-sensitive |
| AGGCTACATGAGTCAGGCGTCGG   | 0 | 13  | RDR2-sensitive |
| AGGCTACTAGATACGAGACAGGC   | 0 | 18  | RDR2-sensitive |
| AGGCTCAGCCCCGGTCGTGGTCGT  | 0 | 16  | RDR2-sensitive |
| AGGCTCAGCGGGTGCATTGACTAT  | 0 | 11  | RDR2-sensitive |
| AGGCTCCAAAGTAGACGAACACGG  | 0 | 30  | RDR2-sensitive |
| AGGCTCCAGTAGATCTTCACGGTA  | 0 | 19  | RDR2-sensitive |
| AGGCTCCATAGGATCTGAAGCGGT  | 0 | 25  | RDR2-sensitive |
| AGGCTCCCGGACTGGACCAGGCAA  | 3 | 213 | RDR2-sensitive |
| AGGCTCCCGGACTGGACCAGGCAT  | 0 | 10  | RDR2-sensitive |
| AGGCTCGAACTCCGGCGACGACGT  | 0 | 41  | RDR2-sensitive |
| AGGCTCGAATCGGGCTCGTTCCGGA | 0 | 14  | RDR2-sensitive |
| AGGCTCGACTCGGGCTCGTTCCGGA | 3 | 189 | RDR2-sensitive |
| AGGCTCGATCGTGCTTTGGACTAA  | 0 | 12  | RDR2-sensitive |
| AGGCTCGGACAAGAACTAGGCAC   | 2 | 24  | RDR2-sensitive |
| AGGCTCGGACAAGAAATTAGGCAC  | 0 | 12  | RDR2-sensitive |
| AGGCTCGGACAGAAAATTAGGCAC  | 0 | 10  | RDR2-sensitive |
| AGGCTCGGACAGGAAATTAGGCAC  | 1 | 60  | RDR2-sensitive |
| AGGCTCGGACCGACCGCACACAG   | 0 | 9   | RDR2-sensitive |
| AGGCTCGGATGTAGTTTTGGATGG  | 0 | 12  | RDR2-sensitive |
| AGGCTCGGCACATAGTACATCGGC  | 0 | 18  | RDR2-sensitive |
| AGGCTCGGCACGGTTATTCTTACA  | 0 | 9   | RDR2-sensitive |
| AGGCTCGGCCTGTCAAACACGGTT  | 0 | 11  | RDR2-sensitive |
| AGGCTCGGCGAACTGTACATCGGC  | 4 | 17  | RDR2-sensitive |
| AGGCTCGGCTATTGAATCGGACTG  | 0 | 10  | RDR2-sensitive |
| AGGCTCGGCTCAGGCTCGTTCCGGA | 0 | 43  | RDR2-sensitive |
| AGGCTCGGCTCGAGCTCGTTCCGGA | 0 | 16  | RDR2-sensitive |
| AGGCTCGGCTCGGACTTGTCCGGA  | 0 | 12  | RDR2-sensitive |

|                           |     |    |                |
|---------------------------|-----|----|----------------|
| AGGCTCGGCTCGGCTCAAAGGCGG  | 0   | 14 | RDR2-sensitive |
| AGGCTCGGCTCGGGCTCGTTCCGGA | 11  | 69 | RDR2-sensitive |
| AGGCTCGGCTCGGTAACGGCTCAC  | 0   | 12 | RDR2-sensitive |
| AGGCTCGGCTCGTCTGGCTGGGGC  | 0   | 20 | RDR2-sensitive |
| AGGCTCGGGCGAGGCGTGATCGAG  | 5   | 20 | RDR2-sensitive |
| AGGCTCGGGCTGACTGGTTCGGCT  | 4   | 22 | RDR2-sensitive |
| AGGCTCGGGCTGGTACGGCTACTA  | 0   | 11 | RDR2-sensitive |
| AGGCTCGGTGGAATAGCAAGACGA  | 0   | 14 | RDR2-sensitive |
| AGGCTCGTAGATGTGTCTTCCGGC  | 0   | 14 | RDR2-sensitive |
| AGGCTCTAGTAGGACGTCGGCGAC  | 0   | 27 | RDR2-sensitive |
| AGGCTCTAGTGTAGACTGCGGCGT  | 0   | 10 | RDR2-sensitive |
| AGGCTCTATGGAATCCGAAGCGGT  | 0   | 11 | RDR2-sensitive |
| AGGCTCTCCGGACTGGACCAGGCA  | 0   | 56 | RDR2-sensitive |
| AGGCTCTCGGGAGATGGAGGACAG  | 125 | 4  | RDR2-resistant |
| AGGCTCTGGAGATGCGACCAAAAT  | 1   | 16 | RDR2-sensitive |
| AGGCTCTGTGAATAGTTGTTGACG  | 384 | 15 | RDR2-resistant |
| AGGCTCTTAACCTTGTGGTCGTGG  | 2   | 18 | RDR2-sensitive |
| AGGCTGAACCAGCGCCGAAGCTGC  | 0   | 17 | RDR2-sensitive |
| AGGCTGAAGAGGCTGATCAGGCAA  | 0   | 13 | RDR2-sensitive |
| AGGCTGACCTGAACCGACCTGACG  | 0   | 9  | RDR2-sensitive |
| AGGCTGAGGACTGTGCGGACGGTG  | 0   | 10 | RDR2-sensitive |
| AGGCTGATAGAGGAGGGAGGCCCG  | 0   | 10 | RDR2-sensitive |
| AGGCTGATCGATGAAGACGTGCGC  | 0   | 10 | RDR2-sensitive |
| AGGCTGATGCACGGGACTATCAAT  | 0   | 9  | RDR2-sensitive |
| AGGCTGATGGTGAACGCAGGAGTA  | 0   | 11 | RDR2-sensitive |
| AGGCTGCAAGAGTAATCGGTCATT  | 0   | 10 | RDR2-sensitive |
| AGGCTGCAAGAGTAGTCGGTCATT  | 0   | 10 | RDR2-sensitive |
| AGGCTGCAAGCATGAACAAGCATA  | 0   | 13 | RDR2-sensitive |
| AGGCTGCTAACGAGAGGACTGA    | 0   | 20 | RDR2-sensitive |
| AGGCTGCAGCTGCCGAGGACGCAT  | 0   | 10 | RDR2-sensitive |
| AGGCTGCAGGATGACTGGGAGGCT  | 0   | 14 | RDR2-sensitive |
| AGGCTGCATCTCGAGGACGAGCTG  | 0   | 9  | RDR2-sensitive |
| AGGCTGCATCTGTGGAGACAGGCC  | 0   | 9  | RDR2-sensitive |
| AGGCTGCCTCGACCTGAAGACGCC  | 0   | 30 | RDR2-sensitive |
| AGGCTGCCTCGACCTGAAGACGCT  | 0   | 17 | RDR2-sensitive |
| AGGCTGCGATGAACCGGCGTCTTC  | 0   | 12 | RDR2-sensitive |
| AGGCTGCGTGCGACGAAGAAGACG  | 0   | 22 | RDR2-sensitive |
| AGGCTGCTCTCGGGACTTCGACGG  | 0   | 72 | RDR2-sensitive |
| AGGCTGGACATTGGACACTCCGGC  | 115 | 6  | RDR2-resistant |
| AGGCTGGACGATGCATGGCGCTGC  | 0   | 28 | RDR2-sensitive |
| AGGCTGGACTTGGACCGAGCTAGA  | 0   | 47 | RDR2-sensitive |
| AGGCTGGAGCAGAGACGTCGGCAA  | 0   | 11 | RDR2-sensitive |
| AGGCTGGCGTGTAGAAGGCAGGCA  | 1   | 17 | RDR2-sensitive |
| AGGCTGGCTCGGACGAGACGGACT  | 0   | 22 | RDR2-sensitive |
| AGGCTGGTAGAAGGAGTAGGGCAT  | 0   | 9  | RDR2-sensitive |
| AGGCTGGTCTGAACGGCAAATGTA  | 0   | 10 | RDR2-sensitive |
| AGGCTGGTGGACACTCGGCGAAGA  | 0   | 10 | RDR2-sensitive |
| AGGCTGTAAGAAGGGCGTCCACAC  | 0   | 19 | RDR2-sensitive |
| AGGCTGTAAGGGGTAGGCTGCCTC  | 1   | 12 | RDR2-sensitive |



|                            |    |     |                |
|----------------------------|----|-----|----------------|
| AGGCTGTAAGGTGTTCCACGTCAT   | 0  | 100 | RDR2-sensitive |
| AGGCTGTAATTGAGGAGGGGCTGA   | 0  | 35  | RDR2-sensitive |
| AGGCTGTACACTGGAGCAGTATGG   | 0  | 10  | RDR2-sensitive |
| AGGCTGTAGCACGTAGGGAGCCGT   | 0  | 28  | RDR2-sensitive |
| AGGCTGTAGCTGCCTAGCTTGGAT   | 0  | 26  | RDR2-sensitive |
| AGGCTGTAGTGAGGCTTCATTGGA   | 1  | 17  | RDR2-sensitive |
| AGGCTGTAGTTATGGTAGTGCCGT   | 0  | 10  | RDR2-sensitive |
| AGGCTGTATTGGCGTAGAGGGCTT   | 0  | 15  | RDR2-sensitive |
| AGGCTGTCAATTGGGCAAAAACCTTC | 0  | 10  | RDR2-sensitive |
| AGGCTGTCCGCTAGAACAGTTCGG   | 0  | 18  | RDR2-sensitive |
| AGGCTGTCCGCTAGGACAGTTCGG   | 0  | 12  | RDR2-sensitive |
| AGGCTGTCTGGACTCTAGGGGCAT   | 0  | 10  | RDR2-sensitive |
| AGGCTGTGAGCCAGTGCTGCGGTG   | 0  | 23  | RDR2-sensitive |
| AGGCTGTGCACTGTTCAAGATACGG  | 0  | 12  | RDR2-sensitive |
| AGGCTGTGGATGATCCGGTATGTT   | 0  | 25  | RDR2-sensitive |
| AGGCTGTGGCACCTTCGGCACCCAC  | 0  | 23  | RDR2-sensitive |
| AGGCTGTGTGGAAACAAAGGCGTG   | 0  | 9   | RDR2-sensitive |
| AGGCTGTTTCTGACCGGACCGTCT   | 0  | 9   | RDR2-sensitive |
| AGGCTTAATCGTGTGCGGGCTCAA   | 0  | 18  | RDR2-sensitive |
| AGGCTTACGGTACGGGAACAGGCT   | 0  | 10  | RDR2-sensitive |
| AGGCTTACTGTCTGCTATCGTCGC   | 0  | 32  | RDR2-sensitive |
| AGGCTTAGGGGACTGCTACACCGA   | 0  | 9   | RDR2-sensitive |
| AGGCTTATGTCCGACGGCTTTGAC   | 0  | 11  | RDR2-sensitive |
| AGGCTTCAAAGTGTCGGACCGGGC   | 0  | 14  | RDR2-sensitive |
| AGGCTTCAACAGAAGCTGGTCCGC   | 0  | 12  | RDR2-sensitive |
| AGGCTTCACTAGAAGTGTGCCGGT   | 0  | 22  | RDR2-sensitive |
| AGGCTTCAGGTGGATGATGAGCTA   | 0  | 28  | RDR2-sensitive |
| AGGCTTCGCCTTGCAGGTCGTCGT   | 0  | 10  | RDR2-sensitive |
| AGGCTTCGCGGACGGTTCGGCCAG   | 0  | 17  | RDR2-sensitive |
| AGGCTTCGTGCCGGGCTCGTGGGC   | 0  | 11  | RDR2-sensitive |
| AGGCTTCTGGGCAAGTCTGTCCGG   | 0  | 9   | RDR2-sensitive |
| AGGCTTGATCTCGCTCGTCGTGAC   | 0  | 13  | RDR2-sensitive |
| AGGCTTGCTTAGCAGGGACTTGGT   | 1  | 12  | RDR2-sensitive |
| AGGCTTGTAAGTCTATCAGACAGA   | 1  | 18  | RDR2-sensitive |
| AGGCTTGTAGGACCATGGGACGGT   | 0  | 10  | RDR2-sensitive |
| AGGCTTTGCCGAGTGCTTCGGACA   | 0  | 9   | RDR2-sensitive |
| AGGCTTTGAAAGTTGGACCGGTT    | 71 | 0   | RDR2-resistant |
| AGGCTTTTAACCTTGTGGTCTGTTG  | 0  | 9   | RDR2-sensitive |
| AGGGAAAAATCGTGCCGGGCCGGC   | 0  | 11  | RDR2-sensitive |
| AGGGAAAAATCGTGCCGGGCCGGC   | 0  | 11  | RDR2-sensitive |
| AGGGAAAAATGTAGAGGGGACCGC   | 0  | 22  | RDR2-sensitive |
| AGGGAAACTGCACGAACACAGCAT   | 0  | 9   | RDR2-sensitive |
| AGGGAAACTGCACGAACACAGCAT   | 0  | 28  | RDR2-sensitive |
| AGGGAAACAAGCAGGCTCAGCTCGA  | 0  | 13  | RDR2-sensitive |
| AGGGAAACCAGCAGAACAAGCACAT  | 0  | 15  | RDR2-sensitive |
| AGGGAAACCGACACGTAGGGGGCGT  | 0  | 12  | RDR2-sensitive |
| AGGGAAACCGCAGAACAAGCACAT   | 0  | 10  | RDR2-sensitive |
| AGGGAACCTGACAGCAGGCGTCGT   | 0  | 9   | RDR2-sensitive |
| AGGGAACGCTACTGGAGACTGAGA   | 0  | 12  | RDR2-sensitive |

|                             |    |     |                |
|-----------------------------|----|-----|----------------|
| AGGGAACGGTAGACCAACGGCTAG    | 0  | 16  | RDR2-sensitive |
| AGGGAACGTGTAGTACGGGTAGGC    | 0  | 10  | RDR2-sensitive |
| AGGGAACGTTGTTGTAGACGGCCT    | 0  | 9   | RDR2-sensitive |
| AGGGAACTAAAAGGCGGCTCAGCT    | 1  | 20  | RDR2-sensitive |
| AGGGAACTCGAGCCCTGCGTCAGG    | 0  | 10  | RDR2-sensitive |
| AGGGAACTCGTGTCCGCAAGACGT    | 0  | 11  | RDR2-sensitive |
| AGGGAACTGAACGATGACGTGGAC    | 0  | 10  | RDR2-sensitive |
| AGGGAACTGGATTACACGGCTTCA    | 0  | 28  | RDR2-sensitive |
| AGGGAACTGTAGCCCAACGGCTAG    | 0  | 32  | RDR2-sensitive |
| AGGGAAGAAGAGGACGCTGCCTGT    | 0  | 10  | RDR2-sensitive |
| AGGGAAGACGAACGCTGCCCTCGG    | 0  | 9   | RDR2-sensitive |
| AGGGAAGACGTCGCTCCTGCTCGC    | 0  | 12  | RDR2-sensitive |
| AGGGAAGCGAAGAGTAGAGGACAC    | 0  | 13  | RDR2-sensitive |
| AGGGAAGGCAGAACGGCAGAACAC    | 0  | 14  | RDR2-sensitive |
| AGGGAAGGGAGCGGATCTGGTGAT    | 3  | 19  | RDR2-sensitive |
| AGGGAAGGGCGTACTCGATCGTGT    | 0  | 25  | RDR2-sensitive |
| AGGGAATACCCAGTCGGAAGTACC    | 1  | 22  | RDR2-sensitive |
| AGGGAATATTCTCCTCAGATCCGG    | 31 | 126 | RDR2-sensitive |
| AGGGAATGCAGAGCATAACAGCGAA   | 0  | 14  | RDR2-sensitive |
| AGGGAATGGGAATAGGCTAGGCGA    | 0  | 12  | RDR2-sensitive |
| AGGGAATGGTGACAGAACACGGAA    | 0  | 9   | RDR2-sensitive |
| AGGGAATGGTGATTTGGATTCGAA    | 24 | 2   | RDR2-resistant |
| AGGGACAACAGAGAACGACAGAGC    | 0  | 14  | RDR2-sensitive |
| AGGGACAACAGAGGTCAGAGGACG    | 0  | 9   | RDR2-sensitive |
| AGGGACAACAGGGGACAACACTAG    | 1  | 21  | RDR2-sensitive |
| AGGGACAACCAGAATCGTGCGCTA    | 0  | 34  | RDR2-sensitive |
| AGGGACAACGACACGACATTGAAA    | 0  | 9   | RDR2-sensitive |
| AGGGACAACGGTGGACAAAAGTACTAG | 0  | 11  | RDR2-sensitive |
| AGGGACAACCTTTGATCAGCCGCAT   | 0  | 13  | RDR2-sensitive |
| AGGGACAAGAACGGGAAAGGCAGC    | 0  | 65  | RDR2-sensitive |
| AGGGACAAGAGAGGACGTCAGGGA    | 0  | 13  | RDR2-sensitive |
| AGGGACAAGCAGCTTCGACTCCGC    | 0  | 12  | RDR2-sensitive |
| AGGGACAAGCATAACTATCATCGC    | 18 | 0   | RDR2-resistant |
| AGGGACAAGGGACAGAAAGTCGGT    | 0  | 10  | RDR2-sensitive |
| AGGGACACAAGGCGCGTGAAACGT    | 0  | 16  | RDR2-sensitive |
| AGGGACACAATTCGTTGTTGGAC     | 0  | 9   | RDR2-sensitive |
| AGGGACACCCTTCGCAGGACTCGG    | 3  | 90  | RDR2-sensitive |
| AGGGACACGAGCAGACGTAGGCTT    | 0  | 30  | RDR2-sensitive |
| AGGGACACGCAGCAACAAATTCAC    | 2  | 16  | RDR2-sensitive |
| AGGGACACTTACGAAGGCAAGCAT    | 0  | 13  | RDR2-sensitive |
| AGGGACAGACGGACAACAGCCAGC    | 0  | 10  | RDR2-sensitive |
| AGGGACAGACGGACAGCAGCCAGC    | 0  | 20  | RDR2-sensitive |
| AGGGACAGAGACGGCTGAAAGCGA    | 0  | 10  | RDR2-sensitive |
| AGGGACAGCTGTAGGACGGTTCGA    | 0  | 24  | RDR2-sensitive |
| AGGGACAGCTGTTGGAGCGGTTCGA   | 7  | 57  | RDR2-sensitive |
| AGGGACAGGCTGATGCTCGTGAC     | 0  | 19  | RDR2-sensitive |
| AGGGACAGGGCAGCAGAATATCTT    | 0  | 25  | RDR2-sensitive |
| AGGGACAGTAGGAGGGCCGAGGAG    | 0  | 9   | RDR2-sensitive |
| AGGGACAGTGAATGCAGTGTCTGTT   | 0  | 40  | RDR2-sensitive |

|                           |    |    |                |
|---------------------------|----|----|----------------|
| AGGGACATAGGAAATTACGGCCAC  | 0  | 10 | RDR2-sensitive |
| AGGGACATAGGTAGAAACGGCCCT  | 0  | 9  | RDR2-sensitive |
| AGGGACATCCCCTGTCTGTTCTCTC | 0  | 16 | RDR2-sensitive |
| AGGGACATGCGGACAACAGCCAGC  | 0  | 11 | RDR2-sensitive |
| AGGGACATGGAACCACCAGACGGT  | 0  | 14 | RDR2-sensitive |
| AGGGACATGTAGCGTCGGATATGA  | 0  | 32 | RDR2-sensitive |
| AGGGACCAGTATGGCGAGACGAGC  | 0  | 14 | RDR2-sensitive |
| AGGGACCCACAGAAGAGTGTGAAC  | 0  | 33 | RDR2-sensitive |
| AGGGACCCCCCTGTCTCGAAACGC  | 0  | 37 | RDR2-sensitive |
| AGGGACCCCCGGTCTCGGAACGCC  | 2  | 16 | RDR2-sensitive |
| AGGGACCCCCTGTCTCGAAACGCC  | 2  | 18 | RDR2-sensitive |
| AGGGACCCTGAAATCTGTTGGCGC  | 0  | 11 | RDR2-sensitive |
| AGGGACCGACACATAGGGAGCGCT  | 0  | 12 | RDR2-sensitive |
| AGGGACCGACACGTAGAGAGCGCT  | 0  | 11 | RDR2-sensitive |
| AGGGACCGACACGTAGGGGGCGCT  | 0  | 11 | RDR2-sensitive |
| AGGGACCGACATCGAGACGGGGTG  | 0  | 9  | RDR2-sensitive |
| AGGGACCGAGCAAGGGATGAGCGC  | 0  | 10 | RDR2-sensitive |
| AGGGACCGATACTCAAGGCACCAG  | 0  | 11 | RDR2-sensitive |
| AGGGACCGATACTCAAGGCATCAG  | 0  | 15 | RDR2-sensitive |
| AGGGACCGATGCTCAAGGCACCAG  | 0  | 50 | RDR2-sensitive |
| AGGGACCTCAGCTTCGGCGTCATT  | 34 | 0  | RDR2-resistant |
| AGGGACCTCATCCTGAACGAAGGG  | 1  | 17 | RDR2-sensitive |
| AGGGACCTCCTCTACACTCAGGGC  | 0  | 20 | RDR2-sensitive |
| AGGGACCTGAAAAGCTAGGCGTTT  | 0  | 16 | RDR2-sensitive |
| AGGGACCTGCCGACTTGACGGAGA  | 1  | 15 | RDR2-sensitive |
| AGGGACCTGTATGATGGACGAGCA  | 0  | 13 | RDR2-sensitive |
| AGGGACCTTCCTAAGAATTGGCAC  | 11 | 31 | RDR2-sensitive |
| AGGGACCTTCCTAGGAATTGGCAC  | 0  | 9  | RDR2-sensitive |
| AGGGACCTTCGGCCATCTCTTGGA  | 2  | 17 | RDR2-sensitive |
| AGGGACCTTTAAGCTACGAGCCAG  | 0  | 29 | RDR2-sensitive |
| AGGGACGAACTCTACAGGTAGCGT  | 0  | 14 | RDR2-sensitive |
| AGGGACGAAGACGAAGCGTCGGTT  | 1  | 19 | RDR2-sensitive |
| AGGGACGAAGACGGACGAAGACGA  | 1  | 19 | RDR2-sensitive |
| AGGGACGACAGAACAGAGAAGCGA  | 2  | 20 | RDR2-sensitive |
| AGGGACGACGCGCGCAACTCGAAC  | 0  | 11 | RDR2-sensitive |
| AGGGACGACTGACGTGAGGACCAT  | 1  | 13 | RDR2-sensitive |
| AGGGACGAGAGAGGACGCCAGAAA  | 0  | 10 | RDR2-sensitive |
| AGGGACGAGAGAGGACGTCAGGGG  | 0  | 10 | RDR2-sensitive |
| AGGGACGAGAGTGAAGGCGAGAGC  | 0  | 9  | RDR2-sensitive |
| AGGGACGAGAGTGGAGGCGAGAGC  | 1  | 47 | RDR2-sensitive |
| AGGGACGCAGACACGATTCACCTA  | 2  | 16 | RDR2-sensitive |
| AGGGACGCAGGGACGAAGCTTCAC  | 0  | 11 | RDR2-sensitive |
| AGGGACGCTCGGTATACAACTTTG  | 0  | 9  | RDR2-sensitive |
| AGGGACGCTGTAGGGGGCACCGCT  | 0  | 15 | RDR2-sensitive |
| AGGGACGGAGCCAGAAAAAAGTTT  | 0  | 13 | RDR2-sensitive |
| AGGGACGGCAGAACCGTGCGCCAC  | 0  | 32 | RDR2-sensitive |
| AGGGACGGCTGACGTGAGGACCAT  | 2  | 34 | RDR2-sensitive |
| AGGGACGGCTGGCGTGAGGACCAT  | 0  | 14 | RDR2-sensitive |
| AGGGACGGGAACAGCCTTCGGGCT  | 14 | 0  | RDR2-resistant |

|                            |    |    |                |
|----------------------------|----|----|----------------|
| AGGGACGGGCCCTATTGAATTCAA   | 0  | 11 | RDR2-sensitive |
| AGGGACGGTCTGTGATCAGGAGTC   | 0  | 9  | RDR2-sensitive |
| AGGGACGGTGACGGACGCCAACGG   | 0  | 9  | RDR2-sensitive |
| AGGGACGTCATCTATCGTTCTCTC   | 0  | 9  | RDR2-sensitive |
| AGGGACGTGACCTACATAGACAGA   | 0  | 13 | RDR2-sensitive |
| AGGGACGTGGGGCACGGTAACCAA   | 0  | 9  | RDR2-sensitive |
| AGGGACGTGGTAATGTAGACGACA   | 0  | 10 | RDR2-sensitive |
| AGGGACGTTCTGCTCGAATCGGTA   | 0  | 13 | RDR2-sensitive |
| AGGGACGTTGTTGAGAATGGCCGC   | 0  | 10 | RDR2-sensitive |
| AGGGACGTTTCGTCGGTCGGCAAT   | 0  | 10 | RDR2-sensitive |
| AGGGACTACAGGCCAGCAAGGTAC   | 1  | 12 | RDR2-sensitive |
| AGGGACTACTGACAAGCAAGGTAC   | 2  | 59 | RDR2-sensitive |
| AGGGACTAGCTTGATCAGTTGCTC   | 0  | 17 | RDR2-sensitive |
| AGGGACTAGGGTTGTGATGGGCAA   | 0  | 13 | RDR2-sensitive |
| AGGGACTATACTGCGTACATCTGC   | 0  | 14 | RDR2-sensitive |
| AGGGACTATACTGCGTACGACAAC   | 0  | 9  | RDR2-sensitive |
| AGGGACTCAAACCTTGCGTCTTT    | 0  | 12 | RDR2-sensitive |
| AGGGACTCCACGCAAAGACGTCGG   | 0  | 13 | RDR2-sensitive |
| AGGGACTCCGTACAAGCCAAAGGC   | 66 | 7  | RDR2-resistant |
| AGGGACTCCTCACTCGAGGAAGAC   | 15 | 0  | RDR2-resistant |
| AGGGACTCGGCTTGCATCGTTCCA   | 0  | 15 | RDR2-sensitive |
| AGGGACTCGTATACCGAGCAGATA   | 0  | 13 | RDR2-sensitive |
| AGGGACTCTCTACATACGCAACAA   | 0  | 12 | RDR2-sensitive |
| AGGGACTGACGTGTTATTCCTATT   | 0  | 10 | RDR2-sensitive |
| AGGGACTGATTTTGTAAACGGTCAG  | 0  | 10 | RDR2-sensitive |
| AGGGACTGCACAGCGTACATCTTC   | 0  | 42 | RDR2-sensitive |
| AGGGACTGCACGACGTACATCTTC   | 0  | 15 | RDR2-sensitive |
| AGGGACTGCACGGCGTACATCTTC   | 0  | 12 | RDR2-sensitive |
| AGGGACTGCACTGCGTACACCTTC   | 0  | 20 | RDR2-sensitive |
| AGGGACTGCACTGCGTACATCTGC   | 0  | 81 | RDR2-sensitive |
| AGGGACTGCACTGCGTACATCTTC   | 1  | 27 | RDR2-sensitive |
| AGGGACTGCAGGGCAGAGAAGCGG   | 1  | 14 | RDR2-sensitive |
| AGGGACTGCCGGCCCAATAGCCCA   | 0  | 14 | RDR2-sensitive |
| AGGGACTGCTGACGTGAGGACCAT   | 0  | 51 | RDR2-sensitive |
| AGGGACTGGCAAAGGGGCCCACTG   | 0  | 12 | RDR2-sensitive |
| AGGGACTGGCATCAAGACGAGATG   | 0  | 21 | RDR2-sensitive |
| AGGGACTGGCGTCGAAGCGAGGCG   | 1  | 18 | RDR2-sensitive |
| AGGGACTGGCGTCGAAGCGAGGGA   | 0  | 17 | RDR2-sensitive |
| AGGGACTGGCTGCTCGCAACGGCG   | 0  | 24 | RDR2-sensitive |
| AGGGACTGGTTGGCACGGCAGGGC   | 0  | 12 | RDR2-sensitive |
| AGGGACTTGTGCCGCAGCAGCCTC   | 2  | 14 | RDR2-sensitive |
| AGGGACTTTTCATTCGTCTGGCCA   | 69 | 0  | RDR2-resistant |
| AGGGAGAACAACCTCGGCAAAGTTAT | 0  | 15 | RDR2-sensitive |
| AGGGAGAAGGACAACGGACAGAAA   | 0  | 15 | RDR2-sensitive |
| AGGGAGAATCCGGCTGTGTAGAGA   | 0  | 11 | RDR2-sensitive |
| AGGGAGACCTTCCTGGTCGGACGG   | 0  | 11 | RDR2-sensitive |
| AGGGAGACGGATACTCTACAGCTT   | 0  | 16 | RDR2-sensitive |
| AGGGAGACGGATGCGGAGACTGCT   | 0  | 9  | RDR2-sensitive |
| AGGGAGACGGGTACTCTACAACCTT  | 0  | 17 | RDR2-sensitive |

|                           |    |     |                |
|---------------------------|----|-----|----------------|
| AGGGAGACGGGTACTCTACAGCTT  | 0  | 23  | RDR2-sensitive |
| AGGGAGATGGCAGAACAATGGTGC  | 0  | 12  | RDR2-sensitive |
| AGGGAGCCGACATGTAGAGGGCGC  | 0  | 23  | RDR2-sensitive |
| AGGGAGCCGGCGTGTAGGGGCACC  | 0  | 10  | RDR2-sensitive |
| AGGGAGCCGTAGCACCCCTCGGCAT | 0  | 15  | RDR2-sensitive |
| AGGGAGCGCTGTAGGAGGCACCGC  | 1  | 109 | RDR2-sensitive |
| AGGGAGCGCTGTAGGGAGCACCGC  | 0  | 40  | RDR2-sensitive |
| AGGGAGCGCTGTAGGGGCACCACT  | 0  | 25  | RDR2-sensitive |
| AGGGAGCGCTGTAGGGGGCACCGC  | 1  | 108 | RDR2-sensitive |
| AGGGAGCGTGGGCGACGGTAGTGC  | 0  | 9   | RDR2-sensitive |
| AGGGAGCTGGACCATGGCGAGCAA  | 0  | 24  | RDR2-sensitive |
| AGGGAGCTGTAGCACCCCTCGGCAT | 0  | 16  | RDR2-sensitive |
| AGGGAGGCGGGGGCATATGGACGG  | 0  | 9   | RDR2-sensitive |
| AGGGAGGCTAGATGAGGAACGGTT  | 0  | 12  | RDR2-sensitive |
| AGGGAGGTGCTGTAGCCGGCTAGG  | 0  | 39  | RDR2-sensitive |
| AGGGAGTAGACGCACGACCTACGC  | 0  | 29  | RDR2-sensitive |
| AGGGAGTAGCAGAACACGGAATGA  | 0  | 9   | RDR2-sensitive |
| AGGGAGTCGGTAGAGCGCGGCGCG  | 0  | 9   | RDR2-sensitive |
| AGGGATAAAAGAGGACGACCACAT  | 0  | 22  | RDR2-sensitive |
| AGGGATAAAGGACCTGACCGTCCC  | 0  | 31  | RDR2-sensitive |
| AGGGATAACCCTCTGGTCGTCTAT  | 0  | 12  | RDR2-sensitive |
| AGGGATAACTGGGGACAACACGGG  | 0  | 11  | RDR2-sensitive |
| AGGGATAAGAGAGAACGCCAGGAG  | 0  | 12  | RDR2-sensitive |
| AGGGATACCCTTATTCCCCTCGGG  | 0  | 12  | RDR2-sensitive |
| AGGGATAGAATAGGACGGACACAT  | 0  | 31  | RDR2-sensitive |
| AGGGATAGATCTGAGCAAGACGTC  | 0  | 11  | RDR2-sensitive |
| AGGGATAGTGGACGGCCGAAGCAG  | 1  | 20  | RDR2-sensitive |
| AGGGATATTGCATGCTCTTAGTCA  | 0  | 10  | RDR2-sensitive |
| AGGGATATTTTACTGTAAATGGCG  | 1  | 42  | RDR2-sensitive |
| AGGGATCAGCTCGGGCGAGACGGA  | 0  | 9   | RDR2-sensitive |
| AGGGATCAGTGAGTGGGCCGGCCC  | 0  | 10  | RDR2-sensitive |
| AGGGATCGTTGCTGGAGATGGTAG  | 0  | 10  | RDR2-sensitive |
| AGGGATCTGTATGGAAGAGCGGAC  | 0  | 18  | RDR2-sensitive |
| AGGGATGACTCTGGGTACGTCCGA  | 4  | 22  | RDR2-sensitive |
| AGGGATGATCGACCTGGGCTTCCT  | 0  | 9   | RDR2-sensitive |
| AGGGATGCTGGACAGCTTTTGACG  | 1  | 14  | RDR2-sensitive |
| AGGGATGCTGGGCTGCAGGGACGT  | 0  | 18  | RDR2-sensitive |
| AGGGATGGAAGAATGTGGCCACAT  | 0  | 10  | RDR2-sensitive |
| AGGGATGGAATGAGGCGGCCACGT  | 1  | 17  | RDR2-sensitive |
| AGGGATGGCAGAACCGTGCACCAA  | 0  | 14  | RDR2-sensitive |
| AGGGATGGTGGCAGAACACGGAAT  | 0  | 13  | RDR2-sensitive |
| AGGGATTAAGTAATTCCCCTCGGC  | 0  | 9   | RDR2-sensitive |
| AGGGATTGAGTGATATGGGAGGGA  | 0  | 26  | RDR2-sensitive |
| AGGGATTGGGTGAAAGGCTTGGAT  | 0  | 33  | RDR2-sensitive |
| AGGGATTGGTCTAGCCGAGGGCAG  | 2  | 27  | RDR2-sensitive |
| AGGGATTGTGCTCGAAGGCGGCCA  | 0  | 9   | RDR2-sensitive |
| AGGGATTGTGCTCGAAGGCGGCTT  | 0  | 14  | RDR2-sensitive |
| AGGGATTTGACTGATTGGTATGGT  | 14 | 0   | RDR2-resistant |
| AGGGATTTGATTGTGTGTCGTCGG  | 30 | 0   | RDR2-resistant |

|                           |    |     |                |
|---------------------------|----|-----|----------------|
| AGGGATTTGCACCAACTGGGCCAT  | 0  | 9   | RDR2-sensitive |
| AGGGCAAACCTCGGCATATGTGCGT | 0  | 11  | RDR2-sensitive |
| AGGGCAAACCTGAAGATGCCGGACA | 0  | 9   | RDR2-sensitive |
| AGGGCAAACCTTGAACAGACCGC   | 0  | 17  | RDR2-sensitive |
| AGGGCAACGGTATGAAGATAGCAA  | 0  | 10  | RDR2-sensitive |
| AGGGCACAGTGGAACGGAGGGAAA  | 0  | 9   | RDR2-sensitive |
| AGGGCACGGCACGGTAGAAGATCC  | 0  | 9   | RDR2-sensitive |
| AGGGCACTACAAGACGAACTGCAC  | 0  | 13  | RDR2-sensitive |
| AGGGCACTGATTAGATCTAGGCCGA | 0  | 21  | RDR2-sensitive |
| AGGGCACTGTACGAGGGTATTTAT  | 0  | 20  | RDR2-sensitive |
| AGGGCACTGTACGGGGTATTTAT   | 2  | 23  | RDR2-sensitive |
| AGGGCACTGTGCGGGGGTATTTAT  | 0  | 10  | RDR2-sensitive |
| AGGGCACTGTGGCATAGATAACTA  | 0  | 12  | RDR2-sensitive |
| AGGGCAGAACAGAGTGGCAGCCTA  | 0  | 13  | RDR2-sensitive |
| AGGGCAGAACGACAGAACGGCCGA  | 0  | 20  | RDR2-sensitive |
| AGGGCAGAACGGCAGAACAGCAGA  | 0  | 39  | RDR2-sensitive |
| AGGGCAGAACGGTAGACTACTCTT  | 0  | 10  | RDR2-sensitive |
| AGGGCAGAGTTGGATTGGGTCATT  | 0  | 11  | RDR2-sensitive |
| AGGGCAGATCTGTAGATGCAGGCT  | 0  | 10  | RDR2-sensitive |
| AGGGCAGCCTGGAGAAGATGACCA  | 0  | 17  | RDR2-sensitive |
| AGGGCAGGGACGTAGTCAACGCGA  | 1  | 14  | RDR2-sensitive |
| AGGGCAGGGTTGATGTTGGACAAC  | 16 | 0   | RDR2-resistant |
| AGGGCAGTAGGGGAGTAGGCGTGT  | 0  | 9   | RDR2-sensitive |
| AGGGCAGTAGGTAGAGAGCGCGC   | 0  | 28  | RDR2-sensitive |
| AGGGCAGTAGTCAAGAGCGTGCTG  | 0  | 19  | RDR2-sensitive |
| AGGGCAGTGTGCGCGACAGCTCTT  | 1  | 16  | RDR2-sensitive |
| AGGGCATAAGGCAGCAACCTCTGA  | 0  | 10  | RDR2-sensitive |
| AGGGCATGATGCATCAGACAGCAC  | 0  | 10  | RDR2-sensitive |
| AGGGCATGGCACTACATACACATT  | 5  | 87  | RDR2-sensitive |
| AGGGCATGGCAGATGATGACGACA  | 0  | 31  | RDR2-sensitive |
| AGGGCATGTACAACCCAGATACGG  | 0  | 41  | RDR2-sensitive |
| AGGGCATGTACAGTAGAGAGACAC  | 0  | 13  | RDR2-sensitive |
| AGGGCATGTACAGTGAAGAGACAT  | 0  | 9   | RDR2-sensitive |
| AGGGCATGTACAGTGGAGAGACAC  | 11 | 139 | RDR2-sensitive |
| AGGGCATGTATAGTGGAGAGACAT  | 3  | 23  | RDR2-sensitive |
| AGGGCATGTGGATCGACACGGCAT  | 1  | 20  | RDR2-sensitive |
| AGGGCCAAGCACTCGGCAAAGCCA  | 1  | 14  | RDR2-sensitive |
| AGGGCCAGCAGAGAACGACAGAGC  | 0  | 16  | RDR2-sensitive |
| AGGGCCATGGACGAAGACGCAGGC  | 0  | 21  | RDR2-sensitive |
| AGGGCCCACGCGATCTGAGGCGGC  | 0  | 9   | RDR2-sensitive |
| AGGGCCCAGAAGAATAGACGACCA  | 0  | 34  | RDR2-sensitive |
| AGGGCCCCCTCAAGCAACGGACAC  | 3  | 41  | RDR2-sensitive |
| AGGGCCCCCTCTGACCACTGGACGT | 0  | 20  | RDR2-sensitive |
| AGGGCCCCCTGTTGGAAGGATGTTT | 0  | 11  | RDR2-sensitive |
| AGGGCCGCTCGGAGCACTCGGCAA  | 0  | 11  | RDR2-sensitive |
| AGGGCCGGTCCTGAGATCTCGGAT  | 0  | 23  | RDR2-sensitive |
| AGGGCCGTGTCTGGACCGAAGGCG  | 0  | 9   | RDR2-sensitive |
| AGGGCCGTTTAGAGGACGCTGCTG  | 0  | 15  | RDR2-sensitive |
| AGGGCCTACGCTCCTACCGTCGGA  | 20 | 0   | RDR2-resistant |

|                           |    |     |                |
|---------------------------|----|-----|----------------|
| AGGGCCTCGGATTTTGTCCGGCACG | 0  | 19  | RDR2-sensitive |
| AGGGCCTGGCAGGGAACGTCGCTG  | 0  | 13  | RDR2-sensitive |
| AGGGCCTGTTTGGAAATGCGGTTT  | 0  | 15  | RDR2-sensitive |
| AGGGCCTGTTTGGTTTGTGGCTAA  | 2  | 15  | RDR2-sensitive |
| AGGGCCTTAAGACCTGTACGTCAT  | 0  | 16  | RDR2-sensitive |
| AGGGCCTTACATTATCCCCGTCGG  | 0  | 12  | RDR2-sensitive |
| AGGGCCTTCTCATCGACCCGTCGG  | 40 | 6   | RDR2-resistant |
| AGGGCCTTCTCATCGACTCGTCGG  | 41 | 0   | RDR2-resistant |
| AGGGCGAAGGAGAACGGCGACCAC  | 0  | 12  | RDR2-sensitive |
| AGGGCGACACTCGGCAAAGACTAG  | 1  | 17  | RDR2-sensitive |
| AGGGCGACAGCCTGAGCGCGCTGT  | 19 | 1   | RDR2-resistant |
| AGGGCGACGGTACGAAGATAACAA  | 0  | 26  | RDR2-sensitive |
| AGGGCGACGGTATGAAGATAGCAA  | 5  | 100 | RDR2-sensitive |
| AGGGCGACTGAGGGCGTAGAGGCT  | 0  | 20  | RDR2-sensitive |
| AGGGCGACTGGACGGTTGGGCTAC  | 0  | 19  | RDR2-sensitive |
| AGGGCGACTGTATGAAGATAGCAA  | 0  | 44  | RDR2-sensitive |
| AGGGCGAGAGGACGATCAGGGACA  | 0  | 18  | RDR2-sensitive |
| AGGGCGCTCCCTAGAATACGGATA  | 0  | 17  | RDR2-sensitive |
| AGGGCGCTGCGCAGATCGACGTCT  | 28 | 0   | RDR2-resistant |
| AGGGCGCTGGAAAGAGGCATCTGG  | 0  | 18  | RDR2-sensitive |
| AGGGCGCTGGCTCCTTTCCGGCGT  | 21 | 0   | RDR2-resistant |
| AGGGCGCTGTAGAGGCACCACTGC  | 0  | 16  | RDR2-sensitive |
| AGGGCGCTGTAGAGGGCACCGCTG  | 0  | 26  | RDR2-sensitive |
| AGGGCGCTGTAGCAGGCACCGCTG  | 1  | 38  | RDR2-sensitive |
| AGGGCGCTGTAGGGGCACCGCTGC  | 0  | 15  | RDR2-sensitive |
| AGGGCGCTGTAGGGGGCACCGCTG  | 1  | 22  | RDR2-sensitive |
| AGGGCGGACTGTCCGCGGCCTGGG  | 0  | 13  | RDR2-sensitive |
| AGGGCGGCACCACTGTTGGGCTAC  | 0  | 15  | RDR2-sensitive |
| AGGGCGGCTGGGAGGAGGGCAGAC  | 58 | 1   | RDR2-resistant |
| AGGGCGGGGTTGATGTTGGACAAC  | 52 | 15  | RDR2-resistant |
| AGGGCGGGTTGTGGTTCGTGCAGC  | 0  | 10  | RDR2-sensitive |
| AGGGCGTAACATAGAAGCGGACGG  | 0  | 10  | RDR2-sensitive |
| AGGGCGTAGAGGCTCGGCGAGGCA  | 0  | 10  | RDR2-sensitive |
| AGGGCGTAGCATATGGCTGGTTAT  | 2  | 43  | RDR2-sensitive |
| AGGGCGTGGAGTAGATGCAGGCAA  | 0  | 9   | RDR2-sensitive |
| AGGGCGTGTTCGGCTGGCTACAAG  | 0  | 16  | RDR2-sensitive |
| AGGGCTAACCAGCAGAACACACGT  | 0  | 12  | RDR2-sensitive |
| AGGGCTAACGACTAAGGATGGCAA  | 1  | 12  | RDR2-sensitive |
| AGGGCTAAGGACACCATGTGGCAA  | 0  | 9   | RDR2-sensitive |
| AGGGCTAAGGTCTCGTTCGTCTGC  | 0  | 15  | RDR2-sensitive |
| AGGGCTACGGCGATTAACCTCGGAA | 0  | 10  | RDR2-sensitive |
| AGGGCTAGAAACGATCCGAGACGA  | 0  | 11  | RDR2-sensitive |
| AGGGCTAGACTCAGTGAGGCTCGG  | 1  | 35  | RDR2-sensitive |
| AGGGCTAGATCTAGGAAGCAGCTT  | 0  | 15  | RDR2-sensitive |
| AGGGCTAGGTCCTCTGCCTGACGG  | 0  | 16  | RDR2-sensitive |
| AGGGCTAGTTTGGATCGGCGCGCC  | 0  | 19  | RDR2-sensitive |
| AGGGCTATTGACGTCGACTTTATG  | 39 | 2   | RDR2-resistant |
| AGGGCTATTGTGCAAAAATGACGT  | 8  | 47  | RDR2-sensitive |
| AGGGCTCAAGCACTTCTCCGACGG  | 3  | 44  | RDR2-sensitive |

|                           |    |     |                |
|---------------------------|----|-----|----------------|
| AGGGCTCAAGCGCTCCTCCGACGG  | 24 | 96  | RDR2-sensitive |
| AGGGCTCAGACACTTCTCCGACGG  | 0  | 22  | RDR2-sensitive |
| AGGGCTCAGGCACTCCTCCGACGG  | 0  | 36  | RDR2-sensitive |
| AGGGCTCAGGCACTTCTCCGACGG  | 9  | 65  | RDR2-sensitive |
| AGGGCTCAGGCGCTCCTCCGACGG  | 0  | 9   | RDR2-sensitive |
| AGGGCTCCATGCATGGACTTGCA   | 0  | 11  | RDR2-sensitive |
| AGGGCTCGGCAACAGTACATCGGC  | 0  | 13  | RDR2-sensitive |
| AGGGCTCGGCGAACAGTACATCGG  | 0  | 9   | RDR2-sensitive |
| AGGGCTCGGGTTTCTGCCGGACGG  | 0  | 16  | RDR2-sensitive |
| AGGGCTCTCGGCACAGGGACTGGC  | 3  | 43  | RDR2-sensitive |
| AGGGCTCTGCTCCTCTGAAAGCGG  | 0  | 13  | RDR2-sensitive |
| AGGGCTGAATCCAGGAAGCAGCTT  | 0  | 14  | RDR2-sensitive |
| AGGGCTGACATGGCATTGACGCGG  | 0  | 9   | RDR2-sensitive |
| AGGGCTGACCTGGCGCTGACGTGG  | 5  | 27  | RDR2-sensitive |
| AGGGCTGACCTGGCTCTGACGTGG  | 3  | 16  | RDR2-sensitive |
| AGGGCTGACGCGACGTTCGACGTGA | 0  | 14  | RDR2-sensitive |
| AGGGCTGAGCAGAGACAGATCCAG  | 0  | 9   | RDR2-sensitive |
| AGGGCTGATTTAGTGACCCGGCAT  | 0  | 12  | RDR2-sensitive |
| AGGGCTGATTTGGTGGTAAGGGAT  | 0  | 21  | RDR2-sensitive |
| AGGGCTGATTTGGTGGTTAGGGAT  | 44 | 4   | RDR2-resistant |
| AGGGCTGCACCAGTGAAACGCGC   | 0  | 15  | RDR2-sensitive |
| AGGGCTGCAGGAACGGCAGATTGA  | 1  | 163 | RDR2-sensitive |
| AGGGCTGCCGTCCGCTTCGTGCTC  | 0  | 11  | RDR2-sensitive |
| AGGGCTGCGCGGAGGGGATAGACA  | 0  | 9   | RDR2-sensitive |
| AGGGCTGCGGACACCGTTGAAGAC  | 0  | 14  | RDR2-sensitive |
| AGGGCTGCGTAGAGATCGGCGAGC  | 0  | 20  | RDR2-sensitive |
| AGGGCTGCTACCCTAGAACCAAGC  | 40 | 729 | RDR2-sensitive |
| AGGGCTGCTGCACGCACGACGCGA  | 0  | 15  | RDR2-sensitive |
| AGGGCTGCTGTGAAGACGATCCTC  | 1  | 30  | RDR2-sensitive |
| AGGGCTGGACAAAATACTCGCGGC  | 0  | 17  | RDR2-sensitive |
| AGGGCTGGACAAAATGCTCGCGGC  | 0  | 30  | RDR2-sensitive |
| AGGGCTGGACGAAATACTCGTGCC  | 0  | 13  | RDR2-sensitive |
| AGGGCTGGACGAAGCATGAGGGTT  | 0  | 65  | RDR2-sensitive |
| AGGGCTGGACGGTCCGCGACCTGA  | 0  | 11  | RDR2-sensitive |
| AGGGCTGGATCAAGGCAGCAACTT  | 0  | 10  | RDR2-sensitive |
| AGGGCTGGATCCAGGAAGCAGCTA  | 0  | 13  | RDR2-sensitive |
| AGGGCTGGATCCAGGAAGCAGCTT  | 19 | 184 | RDR2-sensitive |
| AGGGCTGGATCCAGGAAGCAGTTT  | 0  | 9   | RDR2-sensitive |
| AGGGCTGGATCTAGGAAGCAGCTT  | 3  | 46  | RDR2-sensitive |
| AGGGCTGGATTCAGGAAGCAGCTT  | 0  | 12  | RDR2-sensitive |
| AGGGCTGGATTAGGAAGCAGCTT   | 0  | 12  | RDR2-sensitive |
| AGGGCTGGCGGATAGGTCGGGGGC  | 0  | 9   | RDR2-sensitive |
| AGGGCTGGCGTGGCAACGATGCAG  | 0  | 10  | RDR2-sensitive |
| AGGGCTGGCGTCCGTTAGATATGC  | 0  | 11  | RDR2-sensitive |
| AGGGCTGGGAAGGCTGTAGACAGG  | 0  | 9   | RDR2-sensitive |
| AGGGCTGGGGTGTTACGGGACGGA  | 0  | 16  | RDR2-sensitive |
| AGGGCTGGGTACCGTCGGAGATAA  | 0  | 10  | RDR2-sensitive |
| AGGGCTGGGTGGTGTACGGACGGA  | 0  | 9   | RDR2-sensitive |
| AGGGCTGGTGTGGACGAATACGG   | 0  | 9   | RDR2-sensitive |



|                           |    |     |                |
|---------------------------|----|-----|----------------|
| AGGGCTGTAGACAGGTCGTCAGGC  | 0  | 10  | RDR2-sensitive |
| AGGGCTGTATCTGGTGGACCAGGC  | 0  | 12  | RDR2-sensitive |
| AGGGCTGTCAGGAGTAAGTACCGC  | 0  | 12  | RDR2-sensitive |
| AGGGCTGTGCGTATGGGAGCGGGT  | 0  | 17  | RDR2-sensitive |
| AGGGCTGTGTATAGGGCTGTCTAT  | 0  | 10  | RDR2-sensitive |
| AGGGCTGTTCTTGCTTACCGGTGC  | 0  | 11  | RDR2-sensitive |
| AGGGCTTACCTGGCTCTGACGTGG  | 6  | 44  | RDR2-sensitive |
| AGGGCTTATTTTCAGCTTCGGCT   | 2  | 25  | RDR2-sensitive |
| AGGGCTTCGCTGTTTTGGAGACGC  | 0  | 9   | RDR2-sensitive |
| AGGGCTTCTCTGCCTGACGATCGG  | 2  | 36  | RDR2-sensitive |
| AGGGCTTGTTTCGGTTACACCAATC | 4  | 51  | RDR2-sensitive |
| AGGGCTTGTTTCGGTTACACTAATC | 0  | 18  | RDR2-sensitive |
| AGGGCTTGTTTCGGTTAGCTCTCAA | 1  | 15  | RDR2-sensitive |
| AGGGCTTGTTTCGGTTATACCCCAA | 0  | 9   | RDR2-sensitive |
| AGGGCTTGTTTCGGTTATTCCAAT  | 12 | 65  | RDR2-sensitive |
| AGGGCTTGTTTCGGTTCTACCCCAA | 3  | 35  | RDR2-sensitive |
| AGGGCTTTCTGTTAAGACTTGTAT  | 0  | 18  | RDR2-sensitive |
| AGGGCTTTTCGGGCTGACCCGGCC  | 0  | 14  | RDR2-sensitive |
| AGGGGAACCGCTGAAGACAGTCTG  | 0  | 9   | RDR2-sensitive |
| AGGGGAACCTGGCTCTGGAGATGC  | 1  | 20  | RDR2-sensitive |
| AGGGGAACTCTGCTGCTACGGCTT  | 0  | 12  | RDR2-sensitive |
| AGGGGAAGAGAACGCTGACGTGGC  | 0  | 10  | RDR2-sensitive |
| AGGGGAAGATGCGGGACGATGCTT  | 16 | 0   | RDR2-resistant |
| AGGGGAAGGGGGCGTACTGTAGCC  | 0  | 30  | RDR2-sensitive |
| AGGGGAATCGCGCGATGGCAGAAC  | 0  | 11  | RDR2-sensitive |
| AGGGGACAACACAGGATAGTACTG  | 1  | 20  | RDR2-sensitive |
| AGGGGACACAGGCTAGGGTGCGAC  | 19 | 0   | RDR2-resistant |
| AGGGGACAGAACCGTACATCATGA  | 0  | 18  | RDR2-sensitive |
| AGGGGACAGTGAACAAGGCATCCC  | 0  | 18  | RDR2-sensitive |
| AGGGGACATATGTTGAGCACCAA   | 0  | 12  | RDR2-sensitive |
| AGGGGACCCTCGGGCGAGACGTGA  | 0  | 14  | RDR2-sensitive |
| AGGGGACCGAATTTAGGGGACGTT  | 8  | 139 | RDR2-sensitive |
| AGGGGACCGACACATAGGGGGCGC  | 0  | 18  | RDR2-sensitive |
| AGGGGACCGACACGTAATGGGCGC  | 0  | 50  | RDR2-sensitive |
| AGGGGACCGACACGTAGAGAGCGC  | 0  | 19  | RDR2-sensitive |
| AGGGGACCGACACGTAGAGGATGC  | 0  | 23  | RDR2-sensitive |
| AGGGGACCGACACGTAGAGGCACT  | 0  | 9   | RDR2-sensitive |
| AGGGGACCGACACGTAGAGGGCGC  | 2  | 45  | RDR2-sensitive |
| AGGGGACCGACACGTAGGAGGCGC  | 2  | 30  | RDR2-sensitive |
| AGGGGACCGACACGTAGGGACGCT  | 0  | 54  | RDR2-sensitive |
| AGGGGACCGACACGTAGGGAGCGC  | 1  | 90  | RDR2-sensitive |
| AGGGGACCGACACGTAGGGGACGC  | 3  | 139 | RDR2-sensitive |
| AGGGGACCGACACGTAGGGGCGCT  | 0  | 37  | RDR2-sensitive |
| AGGGGACCGACACGTAGGGGGCGC  | 4  | 247 | RDR2-sensitive |
| AGGGGACCGACACGTAGGGGGCGT  | 0  | 13  | RDR2-sensitive |
| AGGGGACCGACACGTAGTGGGCGC  | 0  | 17  | RDR2-sensitive |
| AGGGGACCGACGCGTAGAGGGCGC  | 0  | 17  | RDR2-sensitive |
| AGGGGACCGACGCGTAGGATGCGC  | 0  | 13  | RDR2-sensitive |
| AGGGGACCGACGTG TAGGGGGCGC | 0  | 10  | RDR2-sensitive |

|                            |    |     |                |
|----------------------------|----|-----|----------------|
| AGGGGACCGATACGTAGGGGACGT   | 0  | 36  | RDR2-sensitive |
| AGGGGACCGTGTTGCACTTATAAG   | 0  | 9   | RDR2-sensitive |
| AGGGGACCTAGTGTGGAAGACCAT   | 0  | 9   | RDR2-sensitive |
| AGGGGACCTGGTGTGGAAGACTAT   | 1  | 18  | RDR2-sensitive |
| AGGGGACGAAATTTAGGGGACGCT   | 3  | 51  | RDR2-sensitive |
| AGGGGACGAAATTTAGGGGACGTT   | 2  | 40  | RDR2-sensitive |
| AGGGGACGACCAGAATTTGTTTTTC  | 14 | 0   | RDR2-resistant |
| AGGGGACGAGATCTAGATTCCAGC   | 1  | 18  | RDR2-sensitive |
| AGGGGACGCTACTGTAGACTGAGA   | 0  | 17  | RDR2-sensitive |
| AGGGGACGCTCTAGATGATCTTAT   | 0  | 9   | RDR2-sensitive |
| AGGGGACGCTGCTGGAGACAACCG   | 1  | 12  | RDR2-sensitive |
| AGGGGACGCTGCTGGAGACAGCCT   | 0  | 15  | RDR2-sensitive |
| AGGGGACGCTGCTGGAGACAGTCT   | 0  | 16  | RDR2-sensitive |
| AGGGGACGCTGCTGGAGACTGAGA   | 2  | 22  | RDR2-sensitive |
| AGGGGACGCTGTAAGGGGCACTGC   | 0  | 19  | RDR2-sensitive |
| AGGGGACGCTGTAGAGGGCACCCGC  | 1  | 307 | RDR2-sensitive |
| AGGGGACGCTGTAGGGGACACCCGC  | 0  | 19  | RDR2-sensitive |
| AGGGGACGCTGTAGGGGCACCCGCT  | 0  | 83  | RDR2-sensitive |
| AGGGGACGCTGTAGGGGGCACCCGC  | 4  | 105 | RDR2-sensitive |
| AGGGGACGCTTTAGAGGACCTTGT   | 0  | 43  | RDR2-sensitive |
| AGGGGACGCTTTAGAGTATCTTGT   | 0  | 9   | RDR2-sensitive |
| AGGGGACGGAATTTAGGGGACGCT   | 1  | 17  | RDR2-sensitive |
| AGGGGACGGGTATGGGACGAATTT   | 0  | 20  | RDR2-sensitive |
| AGGGGACGGGTATGGGACTAATTT   | 0  | 9   | RDR2-sensitive |
| AGGGGACGTCGCTGAAGATTGAGA   | 0  | 11  | RDR2-sensitive |
| AGGGGACGTGATTGGTTGCCGGAT   | 0  | 11  | RDR2-sensitive |
| AGGGGACGTTGCTAGAGACAGCCT   | 2  | 14  | RDR2-sensitive |
| AGGGGACGTTGCTGAAGATAGCCT   | 1  | 73  | RDR2-sensitive |
| AGGGGACGTTGCTGGAGACACAGA   | 5  | 57  | RDR2-sensitive |
| AGGGGACGTTGCTGGAGACAGCCT   | 2  | 81  | RDR2-sensitive |
| AGGGGACGTTGCTGGAGACTGAGA   | 2  | 15  | RDR2-sensitive |
| AGGGGACTCCAAGCTGAACTTCGC   | 0  | 10  | RDR2-sensitive |
| AGGGGACTGACGCGTAGGGGGCGC   | 0  | 11  | RDR2-sensitive |
| AGGGGACTGGGAGGGATGAGGCAT   | 0  | 23  | RDR2-sensitive |
| AGGGGAGAGCGGGCTGGACAGCGG   | 67 | 9   | RDR2-resistant |
| AGGGGAGATGTGGACGTCGACGGT   | 0  | 16  | RDR2-sensitive |
| AGGGGAGGCGACAACGTTGAACAT   | 0  | 12  | RDR2-sensitive |
| AGGGGAGGCTGTAGTGAGGCACTA   | 0  | 12  | RDR2-sensitive |
| AGGGGAGGGAATCTTGCTGACGTG   | 0  | 17  | RDR2-sensitive |
| AGGGGAGGGCAGAACAGAATAGCA   | 0  | 17  | RDR2-sensitive |
| AGGGGAGGGCAGAACAGAGTGGCA   | 0  | 21  | RDR2-sensitive |
| AGGGGAGTGGACTGCATGCCCGGC   | 0  | 16  | RDR2-sensitive |
| AGGGGAGTGTAGAGAGCGACGTCT   | 0  | 14  | RDR2-sensitive |
| AGGGGATACCCAGTCGGAAGTACC   | 0  | 10  | RDR2-sensitive |
| AGGGGATAGAATTTAGGGGACGTT   | 2  | 26  | RDR2-sensitive |
| AGGGGATAGAGCTGACACCTTAGG   | 0  | 13  | RDR2-sensitive |
| AGGGGATGACAGCTTCGACGACGA   | 0  | 12  | RDR2-sensitive |
| AGGGGATGACGGATTTCGACAACCTC | 0  | 11  | RDR2-sensitive |
| AGGGGATGACGGGTTTCGACGACTC  | 1  | 18  | RDR2-sensitive |

|                           |    |     |                |
|---------------------------|----|-----|----------------|
| AGGGGATGACGGGTTCGATGACTC  | 0  | 21  | RDR2-sensitive |
| AGGGGATGGAATCTTGCTGACGTG  | 1  | 41  | RDR2-sensitive |
| AGGGGATGTAGAGGGAGAGTAGAA  | 0  | 11  | RDR2-sensitive |
| AGGGGCAACGGTACACTAACCTGA  | 36 | 2   | RDR2-resistant |
| AGGGGCACATACTGGATGAGACAA  | 0  | 11  | RDR2-sensitive |
| AGGGGCACGTAGATGGCAGAACCA  | 0  | 21  | RDR2-sensitive |
| AGGGGCACGTAGGGCGTACCAAGA  | 0  | 18  | RDR2-sensitive |
| AGGGGCACTGTAGGGGGCACCGCT  | 0  | 10  | RDR2-sensitive |
| AGGGGCCGGTAGTCAGTGTCTTGG  | 0  | 12  | RDR2-sensitive |
| AGGGGCGAGAGTGGAGACGAGAGC  | 2  | 21  | RDR2-sensitive |
| AGGGGCGAGAGTGGAGGCGAGAGC  | 3  | 142 | RDR2-sensitive |
| AGGGGCGAGATAGAACACCAGAGG  | 0  | 13  | RDR2-sensitive |
| AGGGGCGCAATGTGGATTAGATGC  | 0  | 11  | RDR2-sensitive |
| AGGGGCGCGCCCCTGTTCTTTGCC  | 17 | 1   | RDR2-resistant |
| AGGGGCGCGGAACGAAGGCAGAAC  | 0  | 27  | RDR2-sensitive |
| AGGGGCGCGGTTAGACGGTTAGGA  | 1  | 15  | RDR2-sensitive |
| AGGGGCGCTGTAGAGGGCACCGCT  | 1  | 100 | RDR2-sensitive |
| AGGGGCGCTGTAGGGACACCGCTG  | 0  | 9   | RDR2-sensitive |
| AGGGGCGCTGTAGGGGGCACCGCT  | 0  | 11  | RDR2-sensitive |
| AGGGGCGCTGTAGGGGTACCGCTG  | 0  | 29  | RDR2-sensitive |
| AGGGGCGGACGGTCCGTGTAACAC  | 0  | 13  | RDR2-sensitive |
| AGGGGCTACAACATATACTTCTTA  | 23 | 0   | RDR2-resistant |
| AGGGGCTAGTTTGGATCGGCACGC  | 0  | 16  | RDR2-sensitive |
| AGGGGCTAGTTTGGATCGGCGCGC  | 0  | 22  | RDR2-sensitive |
| AGGGGCTATTTGGACAGACGCCTA  | 0  | 19  | RDR2-sensitive |
| AGGGGCTCGGACTCGACCTCGGCC  | 1  | 13  | RDR2-sensitive |
| AGGGGCTCTCGGAAATAAGACGTT  | 0  | 15  | RDR2-sensitive |
| AGGGGCTCTCTGCATTGATGGAAG  | 0  | 11  | RDR2-sensitive |
| AGGGGCTGAGGGCAGCAGTGGCAC  | 0  | 12  | RDR2-sensitive |
| AGGGGCTGATGCTCAAGGCATAAG  | 0  | 12  | RDR2-sensitive |
| AGGGGCTGCACGGCTTTACGTCA   | 1  | 19  | RDR2-sensitive |
| AGGGGCTGCGACCAGCGCGCTGGA  | 1  | 29  | RDR2-sensitive |
| AGGGGCTGCTTCGGTCTGGGGCAC  | 0  | 10  | RDR2-sensitive |
| AGGGGCTGGGTGTACGGACGGACG  | 0  | 12  | RDR2-sensitive |
| AGGGGCTGTTTCGGTCTGGGGCAC  | 0  | 9   | RDR2-sensitive |
| AGGGGCTGTTTGGTGTGTGGCCTA  | 0  | 11  | RDR2-sensitive |
| AGGGGCTGTTTGGTTCTGTGGCTAA | 1  | 13  | RDR2-sensitive |
| AGGGGCTTCAGAATGGACACGCGC  | 0  | 9   | RDR2-sensitive |
| AGGGGCTTCTCTGGTCGCTCAGGT  | 0  | 27  | RDR2-sensitive |
| AGGGGGAACCGCTGAAGACAGTCT  | 0  | 40  | RDR2-sensitive |
| AGGGGGAACCGCTGCGGGAGATGA  | 1  | 16  | RDR2-sensitive |
| AGGGGACTGAGGGCGTAGAGGCT   | 0  | 11  | RDR2-sensitive |
| AGGGGACTGTAGTGAGGCTCCAA   | 0  | 9   | RDR2-sensitive |
| AGGGGACTGTAGTGAGGCTCCAT   | 0  | 45  | RDR2-sensitive |
| AGGGGGCACGGTAGAGGGCTGCGC  | 0  | 21  | RDR2-sensitive |
| AGGGGGCACGGTTGCGGACAGTCT  | 0  | 10  | RDR2-sensitive |
| AGGGGGCACTGTAGGGGGCACAC   | 0  | 13  | RDR2-sensitive |
| AGGGGGCGCTGTAGAGGGCACCGC  | 0  | 65  | RDR2-sensitive |
| AGGGGGCGCTGTAGAGGGCACCGC  | 0  | 44  | RDR2-sensitive |

|                           |    |    |                |
|---------------------------|----|----|----------------|
| AGGGGGCGCTGTAGGGAGCACCGC  | 0  | 13 | RDR2-sensitive |
| AGGGGGCGCTGTAGGGGACACCGC  | 0  | 11 | RDR2-sensitive |
| AGGGGGCGCTGTAGGGGCACCGCT  | 0  | 24 | RDR2-sensitive |
| AGGGGGCGCTGTAGGGGGCACCGC  | 2  | 19 | RDR2-sensitive |
| AGGGGGCGCTGTAGTGGGCACCGC  | 0  | 18 | RDR2-sensitive |
| AGGGGGCTCAGCGACTGACGGGAA  | 34 | 6  | RDR2-resistant |
| AGGGGGCTCTGCCAGCGATGACAC  | 0  | 12 | RDR2-sensitive |
| AGGGGGCTGTAGCACCCCTCGGCAT | 0  | 16 | RDR2-sensitive |
| AGGGGGTAGTGCTACATGTTTCAA  | 0  | 10 | RDR2-sensitive |
| AGGGGTAGAACCGTGCACCGTGAA  | 0  | 11 | RDR2-sensitive |
| AGGGGTAGATCTGAGCAAGACGTC  | 0  | 53 | RDR2-sensitive |
| AGGGGTTCGGCGTGTAGGGGGCACC | 0  | 11 | RDR2-sensitive |
| AGGGGTTCGGTATGCATGCCCTGGG | 0  | 16 | RDR2-sensitive |
| AGGGGTGAACTCTAGGTGACGTGA  | 0  | 9  | RDR2-sensitive |
| AGGGGTGGCCTGTAGCCGTCACGG  | 0  | 18 | RDR2-sensitive |
| AGGGGTGTTGATCTCGGTCGTCGT  | 0  | 18 | RDR2-sensitive |
| AGGGGTTACTCTGGGTCGGCAGGC  | 0  | 9  | RDR2-sensitive |
| AGGGGTTGCATGCAGACTGGGACC  | 0  | 11 | RDR2-sensitive |
| AGGGGTTGGACGTGGAGAAGATGG  | 0  | 15 | RDR2-sensitive |
| AGGGGTTGGCGTGAGGAAGATGG   | 0  | 15 | RDR2-sensitive |
| AGGGGTTGTCTAGGCTCGGGCCGG  | 2  | 37 | RDR2-sensitive |
| AGGGTAAACAGAATAACTAGGCTT  | 14 | 0  | RDR2-resistant |
| AGGGTAACAGAAGCTGCGCGGCGT  | 0  | 9  | RDR2-sensitive |
| AGGGTACAAGGCGCATCCTGGACA  | 0  | 11 | RDR2-sensitive |
| AGGGTACCCCGTAGGAGATGGCAT  | 0  | 11 | RDR2-sensitive |
| AGGGTACTGTATGCCGCGGTGACA  | 0  | 10 | RDR2-sensitive |
| AGGGTACTGTTTACTGTCCGGTGC  | 0  | 10 | RDR2-sensitive |
| AGGGTAGACAGAGGGAATAGACGA  | 0  | 10 | RDR2-sensitive |
| AGGGTAGACAGTAGGAATAGACGA  | 0  | 26 | RDR2-sensitive |
| AGGGTAGACCGGGGGAATAGACGA  | 0  | 9  | RDR2-sensitive |
| AGGGTAGACTTAGACGGAGGGTAG  | 0  | 15 | RDR2-sensitive |
| AGGGTAGAGCTTAGAGCAGGGCGG  | 0  | 10 | RDR2-sensitive |
| AGGGTAGATCTGAGCAAGACGTCC  | 0  | 11 | RDR2-sensitive |
| AGGGTAGATGCGACAGGGTAGAAG  | 0  | 13 | RDR2-sensitive |
| AGGGTAGCAGATGGGCTTGTGGAG  | 0  | 9  | RDR2-sensitive |
| AGGGTAGCCGTCGGAGATAAGGCG  | 1  | 27 | RDR2-sensitive |
| AGGGTAGCGAAGATGTGGGGCTGA  | 0  | 10 | RDR2-sensitive |
| AGGGTAGCTCTTGAGGTGCAGCGG  | 0  | 22 | RDR2-sensitive |
| AGGGTAGGATACAAGATGAGCTAA  | 0  | 15 | RDR2-sensitive |
| AGGGTAGGATACAGGATGAGCTAA  | 1  | 71 | RDR2-sensitive |
| AGGGTAGGATACAGGATGAGCTAC  | 1  | 80 | RDR2-sensitive |
| AGGGTAGGATACAGGATGGGCTAA  | 0  | 11 | RDR2-sensitive |
| AGGGTAGGATACATGATGAGCTAA  | 0  | 16 | RDR2-sensitive |
| AGGGTAGGATACGGAATGACCATG  | 0  | 10 | RDR2-sensitive |
| AGGGTAGGATACGGGATGAGCTAA  | 0  | 21 | RDR2-sensitive |
| AGGGTAGTACACTCGGCATATCCA  | 0  | 12 | RDR2-sensitive |
| AGGGTATCCACTGCAAGACGCTAT  | 0  | 23 | RDR2-sensitive |
| AGGGTATCGACCATTCCGATAGCA  | 0  | 14 | RDR2-sensitive |
| AGGGTATTGTATATAGTAAGGCTT  | 17 | 0  | RDR2-resistant |

|                           |     |     |                |
|---------------------------|-----|-----|----------------|
| AGGGTCAAAGTAGGATGAGCCGGA  | 0   | 12  | RDR2-sensitive |
| AGGGTCAACAGAGAACGACAGAGC  | 0   | 10  | RDR2-sensitive |
| AGGGTCAAGTAGAGGCGAGTTGAA  | 0   | 13  | RDR2-sensitive |
| AGGGTCACCCTAGGACTGGGCGTT  | 1   | 18  | RDR2-sensitive |
| AGGGTCACGTTGCAACTCACGGCG  | 18  | 1   | RDR2-resistant |
| AGGGTCAGCAGAGAACGACAGAAC  | 1   | 15  | RDR2-sensitive |
| AGGGTCAGCAGAGAACGACAGAGC  | 1   | 190 | RDR2-sensitive |
| AGGGTCAGCTGCAGGGAACAACGG  | 0   | 36  | RDR2-sensitive |
| AGGGTCAGTAGCATACAAGGAATG  | 0   | 22  | RDR2-sensitive |
| AGGGTCATTGTGTCCTGTCTGGGCC | 0   | 10  | RDR2-sensitive |
| AGGGTCCAGCGGCCCGAAGAGCAC  | 27  | 2   | RDR2-resistant |
| AGGGTCCAGTGGACGTCAGATCAT  | 0   | 9   | RDR2-sensitive |
| AGGGTCCATGCTCTGCTCAGGCAC  | 173 | 4   | RDR2-resistant |
| AGGGTCGACGATCTGTACGACGGT  | 0   | 9   | RDR2-sensitive |
| AGGGTCGATGCAACTTGACGGATT  | 0   | 21  | RDR2-sensitive |
| AGGGTCGTACCCTGTTGACTCGGG  | 0   | 13  | RDR2-sensitive |
| AGGGTCGTTCCGAAGGGCTGGTTC  | 44  | 3   | RDR2-resistant |
| AGGGTCTCCTGGATCAATGTTTGA  | 16  | 0   | RDR2-resistant |
| AGGGTCTCGAACGGCAAGGGCTTC  | 3   | 24  | RDR2-sensitive |
| AGGGTCTCGCATGCAGCTGACGAA  | 0   | 9   | RDR2-sensitive |
| AGGGTCTGACGCAGAAGAAGTGTCT | 0   | 14  | RDR2-sensitive |
| AGGGTCTGATAAAATAGAGGACGT  | 0   | 16  | RDR2-sensitive |
| AGGGTCTGGACGGTCCGCGATGGC  | 0   | 22  | RDR2-sensitive |
| AGGGTCTGTTTACCTCTAGAAGAC  | 2   | 15  | RDR2-sensitive |
| AGGGTCTGTTTGGCATGGCTTCAG  | 0   | 9   | RDR2-sensitive |
| AGGGTCTGTTTGGTAGAGCTACGG  | 0   | 29  | RDR2-sensitive |
| AGGGTGAATATGAACGCGGAGTAT  | 1   | 14  | RDR2-sensitive |
| AGGGTGACAACCTTATGAAGCCGA  | 0   | 18  | RDR2-sensitive |
| AGGGTGACACGCATAGGACATCGT  | 1   | 22  | RDR2-sensitive |
| AGGGTGACGAGGATGATGCGGATA  | 21  | 0   | RDR2-resistant |
| AGGGTGATGAACAGTGACACGCTA  | 4   | 93  | RDR2-sensitive |
| AGGGTGATGAACAGTGACGCGCTA  | 0   | 25  | RDR2-sensitive |
| AGGGTGCATCGCCGGTTCGGACAGA | 0   | 15  | RDR2-sensitive |
| AGGGTGCATGCGGCTGATGAGCAT  | 52  | 11  | RDR2-resistant |
| AGGGTGCCACCAATTGATGATCGT  | 21  | 1   | RDR2-resistant |
| AGGGTGCGCGGATTTTACGACCGGA | 23  | 1   | RDR2-resistant |
| AGGGTGCTCCGAGATCGGCAGGAC  | 0   | 14  | RDR2-sensitive |
| AGGGTGCTCTGAAGGTCGGTAGGC  | 0   | 10  | RDR2-sensitive |
| AGGGTGGACTGCAGCAGCCGGCAT  | 0   | 40  | RDR2-sensitive |
| AGGGTGGAGATTGACGGAAGGCAG  | 0   | 11  | RDR2-sensitive |
| AGGGTGGAGGTAGATATGCGGAAA  | 0   | 11  | RDR2-sensitive |
| AGGGTGGATCTGAGGCGAGTCGGT  | 0   | 10  | RDR2-sensitive |
| AGGGTGGTAGACGCAACAATAGAC  | 0   | 9   | RDR2-sensitive |
| AGGGTGTAGCGTATGGCTGGTTAT  | 0   | 9   | RDR2-sensitive |
| AGGGTGTAGGCTTACGGTACAGAA  | 0   | 18  | RDR2-sensitive |
| AGGGTGTTACACTGTTACTCGGCA  | 0   | 9   | RDR2-sensitive |
| AGGGTGTTTGGCATGCTCTGGCCA  | 0   | 17  | RDR2-sensitive |
| AGGGTTAGGATTTTTTTTGTCCGC  | 0   | 9   | RDR2-sensitive |
| AGGGTTCGTTTCTGGGAGCGCGG   | 0   | 12  | RDR2-sensitive |

|                           |    |     |                |
|---------------------------|----|-----|----------------|
| AGGGTTCTCTCTGTAGGAGCACGG  | 0  | 14  | RDR2-sensitive |
| AGGGTTCTCTGTAGGCCGGACGGT  | 0  | 24  | RDR2-sensitive |
| AGGGTTCTGGAGCAGTTGACCGTT  | 1  | 20  | RDR2-sensitive |
| AGGGTTCTTTTCTCTCGGACACAC  | 0  | 10  | RDR2-sensitive |
| AGGGTTGAGCAGGGGATGACGGGT  | 0  | 11  | RDR2-sensitive |
| AGGGTTGCAGAATGACGCCGCCGC  | 0  | 12  | RDR2-sensitive |
| AGGGTTGCTAGAACTAGAGGCCGT  | 0  | 10  | RDR2-sensitive |
| AGGGTTGCTGACGCTGACGGGACG  | 0  | 15  | RDR2-sensitive |
| AGGGTTGGAGGTGGATATGCCGAA  | 0  | 9   | RDR2-sensitive |
| AGGGTTGGATCCAGAAAGCAGCTT  | 0  | 9   | RDR2-sensitive |
| AGGGTTGGGGTCCAGACGAGGCAT  | 0  | 9   | RDR2-sensitive |
| AGGGTTGTCACAGAACCGTTGGAC  | 0  | 16  | RDR2-sensitive |
| AGGGTTGTCCGGCAGAGGATCTGA  | 0  | 14  | RDR2-sensitive |
| AGGGTTGTCTGAAGTCCGTTGGAC  | 4  | 18  | RDR2-sensitive |
| AGGGTTGTCTGAGATCCGTTGGAC  | 1  | 102 | RDR2-sensitive |
| AGGGTTGTCTGAGGTCCGTTGGAC  | 29 | 71  | RDR2-sensitive |
| AGGGTTGTCTGAGGTCTGTTGGAC  | 11 | 30  | RDR2-sensitive |
| AGGGTTGTCTGATGTCTGTTGGAC  | 7  | 77  | RDR2-sensitive |
| AGGGTTGTGCATGAGCCAGGGCAT  | 0  | 13  | RDR2-sensitive |
| AGGGTTGTGGGCCGTTGGATGCAA  | 0  | 9   | RDR2-sensitive |
| AGGGTTGTGGGCCGTTGGATGCTA  | 0  | 14  | RDR2-sensitive |
| AGGGTTGTTTTCTTTGATTCGGAT  | 0  | 14  | RDR2-sensitive |
| AGGGTTTAGGACTTTAGGCCGGCAC | 0  | 18  | RDR2-sensitive |
| AGGGTTTAGGGTGTACTGTAGCC   | 0  | 17  | RDR2-sensitive |
| AGGGTTTAGGGTTTAGGGTTTAGG  | 18 | 0   | RDR2-resistant |
| AGGGTTTGTGCCACGGACACGGG   | 0  | 10  | RDR2-sensitive |
| AGGTAAACGGACCGTGTAGGCTA   | 1  | 28  | RDR2-sensitive |
| AGGTAAACTTTAGGTAGACTGCTA  | 0  | 12  | RDR2-sensitive |
| AGGTAACACGACTCGACGCTACAG  | 0  | 17  | RDR2-sensitive |
| AGGTAACAGAGGACGGGGGAATAA  | 0  | 9   | RDR2-sensitive |
| AGGTAACATCGGGTCGGATTCGGA  | 0  | 26  | RDR2-sensitive |
| AGGTAACTGAGGTACCGTCTGGTC  | 0  | 18  | RDR2-sensitive |
| AGGTAACTGATGGACCACCCGGCC  | 0  | 11  | RDR2-sensitive |
| AGGTAACTGTAGCCATGCGCGGAC  | 0  | 24  | RDR2-sensitive |
| AGGTAACTTACCGATTCGGAGCAC  | 0  | 11  | RDR2-sensitive |
| AGGTAAGTCTGTGGATCAAAAGGT  | 20 | 0   | RDR2-resistant |
| AGGTAAGTGTGTGACTGATGGTGG  | 0  | 10  | RDR2-sensitive |
| AGGTAATACGACCGACGGCTCTAA  | 0  | 12  | RDR2-sensitive |
| AGGTAATTCTGGGTCGGACCGCAA  | 0  | 9   | RDR2-sensitive |
| AGGTAATTGGTTTCGATTGGAATGT | 0  | 10  | RDR2-sensitive |
| AGGTACAAGGCGCATCCTGGACAT  | 0  | 27  | RDR2-sensitive |
| AGGTACACTAGAGTAGATATCATC  | 74 | 0   | RDR2-resistant |
| AGGTACCACAGAATGAGGCGCATG  | 0  | 15  | RDR2-sensitive |
| AGGTACCACAGGATGAGGCGCATG  | 2  | 25  | RDR2-sensitive |
| AGGTACCCTCGGACTAAAGTCGGC  | 1  | 21  | RDR2-sensitive |
| AGGTACCGCAGGATGAGGCGCATG  | 4  | 34  | RDR2-sensitive |
| AGGTACCTGTAGTACCTATGCATG  | 97 | 5   | RDR2-resistant |
| AGGTACCTTCGGACTCAAGTCGGT  | 0  | 9   | RDR2-sensitive |
| AGGTACGACGGACATTCCGGCTAT  | 0  | 12  | RDR2-sensitive |

|                            |    |     |                |
|----------------------------|----|-----|----------------|
| AGGTACGACTGTACGAGTGCGGAT   | 2  | 36  | RDR2-sensitive |
| AGGTACGGAGTGAGAACAGAGGCG   | 0  | 10  | RDR2-sensitive |
| AGGTACGGTACGACTACGAGCGGC   | 0  | 9   | RDR2-sensitive |
| AGGTACGGTTAGAAACAGGGTCGG   | 0  | 10  | RDR2-sensitive |
| AGGTACGTGATGCGTCGGCACAAAC  | 0  | 9   | RDR2-sensitive |
| AGGTACTACTACCGTGTCCGGCACG  | 1  | 28  | RDR2-sensitive |
| AGGTACTCGGAAAAGCCGTCGGTT   | 0  | 14  | RDR2-sensitive |
| AGGTACTCTTAGGATGATTGGTTG   | 0  | 10  | RDR2-sensitive |
| AGGTACTCTTATTGTCGGCGTTTC   | 2  | 16  | RDR2-sensitive |
| AGGTACTCTTTAGGGCGACGCATT   | 1  | 34  | RDR2-sensitive |
| AGGTACTGCAGGATGAGGCGCATG   | 0  | 14  | RDR2-sensitive |
| AGGTACTGGACGGATGGGTTGAAT   | 0  | 17  | RDR2-sensitive |
| AGGTACTGGAGACTCCTACAGAAG   | 0  | 50  | RDR2-sensitive |
| AGGTACTGGTCCCTGGTCAACGAC   | 0  | 10  | RDR2-sensitive |
| AGGTACTGTAAAATAGAGGACGTG   | 0  | 24  | RDR2-sensitive |
| AGGTACTGTGAACTATGGCTGCAT   | 0  | 23  | RDR2-sensitive |
| AGGTACTGTGCACTGTCCGGTGGC   | 1  | 24  | RDR2-sensitive |
| AGGTACTGTGGATCGGCCTAGTAC   | 0  | 53  | RDR2-sensitive |
| AGGTACTGTGTACGGACCATGCCC   | 0  | 16  | RDR2-sensitive |
| AGGTACTGTTCACTGTCCGGTGGC   | 2  | 43  | RDR2-sensitive |
| AGGTACTGTTTACTGTCCGGTGGC   | 2  | 20  | RDR2-sensitive |
| AGGTACTGTTTGATGTCCGGTGTG   | 4  | 32  | RDR2-sensitive |
| AGGTACTGTTTGCTGTCCGGTGTG   | 10 | 27  | RDR2-sensitive |
| AGGTACTTATGAACTGTAATCGGC   | 0  | 11  | RDR2-sensitive |
| AGGTACTTGAACGGACCCGAGGC    | 0  | 27  | RDR2-sensitive |
| AGGTACTTGTTTATCTTAGTCACG   | 20 | 0   | RDR2-resistant |
| AGGTAGAACACAAGGGAGGCAGGC   | 0  | 9   | RDR2-sensitive |
| AGGTAGAACATCTGGTGTAGACGC   | 0  | 9   | RDR2-sensitive |
| AGGTAGAACAGCGTGAGCCGTGT    | 0  | 12  | RDR2-sensitive |
| AGGTAGAACAGGGGAGGCAGCCT    | 0  | 19  | RDR2-sensitive |
| AGGTAGAACCGCTGCGGGAGATAA   | 0  | 28  | RDR2-sensitive |
| AGGTAGAACCTAGGCAGACCACGA   | 0  | 16  | RDR2-sensitive |
| AGGTAGAACGGTAGAACAGGCAG    | 0  | 14  | RDR2-sensitive |
| AGGTAGAATGTTTCGTCGTACGTC   | 0  | 17  | RDR2-sensitive |
| AGGTAGAATTGTTTTTATGATGGGTA | 0  | 32  | RDR2-sensitive |
| AGGTAGACTCGGCACAGACTGG     | 8  | 81  | RDR2-sensitive |
| AGGTAGAGCTGCAGGCAGAGAGCA   | 1  | 16  | RDR2-sensitive |
| AGGTAGAGCTGTACGGGCATCAAC   | 3  | 226 | RDR2-sensitive |
| AGGTAGATCGGTAAGCAACTCCTT   | 16 | 0   | RDR2-resistant |
| AGGTAGATTTGGACGGCGCAGGCG   | 0  | 9   | RDR2-sensitive |
| AGGTAGCACTCTCAGCAAAGGCTC   | 0  | 32  | RDR2-sensitive |
| AGGTAGCAGCGGATGCAACAAACT   | 0  | 18  | RDR2-sensitive |
| AGGTAGCGCGGGACGATGCGGCC    | 18 | 1   | RDR2-resistant |
| AGGTAGCTCGGCGCCAAGATCTAT   | 0  | 15  | RDR2-sensitive |
| AGGTAGGACCGAGGACGCGGGATG   | 0  | 9   | RDR2-sensitive |
| AGGTAGGCACTCGGCAAAGACAAG   | 3  | 63  | RDR2-sensitive |
| AGGTAGGCGGCATGTAGGGCAAGA   | 0  | 21  | RDR2-sensitive |
| AGGTAGGGGACGGACGTAGAGGCG   | 1  | 48  | RDR2-sensitive |
| AGGTAGGGGGCGGACGTAGAGGTG   | 0  | 21  | RDR2-sensitive |

|                           |    |    |                |
|---------------------------|----|----|----------------|
| AGGTAGTACACCTGGTCGTTGCAC  | 0  | 11 | RDR2-sensitive |
| AGGTATCCTCGGACAAGTCGGCGT  | 2  | 45 | RDR2-sensitive |
| AGGTATCGCGGCTGCAGAGGCAGA  | 0  | 14 | RDR2-sensitive |
| AGGTATCGGATACCGGGCGGATAC  | 0  | 9  | RDR2-sensitive |
| AGGTATCGGGCCAGCACGAAACGG  | 0  | 11 | RDR2-sensitive |
| AGGTATCTTCGGACTCAAGTCGGC  | 3  | 25 | RDR2-sensitive |
| AGGTATCTTCGGACTCAAGTCGGT  | 4  | 31 | RDR2-sensitive |
| AGGTATCTTCGGACTCGAATCGGC  | 20 | 0  | RDR2-resistant |
| AGGTATCTTCGGACTCGAGTCGGT  | 2  | 63 | RDR2-sensitive |
| AGGTATCTTCGGGCTCGAGTCGGT  | 0  | 10 | RDR2-sensitive |
| AGGTATGAATTGTTATGTTGACTG  | 0  | 10 | RDR2-sensitive |
| AGGTATGCCCATTTTCGTCGGTA   | 0  | 31 | RDR2-sensitive |
| AGGTATGCTGTAGTAGTGCACCAA  | 0  | 9  | RDR2-sensitive |
| AGGTATGGTAGACTGTCCGGCTAT  | 2  | 30 | RDR2-sensitive |
| AGGTATTGGCCGTCGGACGGCAC   | 2  | 22 | RDR2-sensitive |
| AGGTCAAAGTAGGATGAGACGGGA  | 0  | 13 | RDR2-sensitive |
| AGGTCAAAGTAGGATGAGTCGGAG  | 0  | 10 | RDR2-sensitive |
| AGGTCAAAGTAGGATGAGTCGGGG  | 0  | 13 | RDR2-sensitive |
| AGGTCAAGTTGGGTTTGTCCGGTC  | 0  | 20 | RDR2-sensitive |
| AGGTCACACTAGGACGGATCTATA  | 0  | 9  | RDR2-sensitive |
| AGGTCACTGTGGGAAACGGAGACG  | 0  | 11 | RDR2-sensitive |
| AGGTCAGAACGGCAGACTACTCTT  | 0  | 16 | RDR2-sensitive |
| AGGTCAGACGGTTCGCGATGGCAC  | 0  | 9  | RDR2-sensitive |
| AGGTCAGCCCTGGACGCAGCTAGC  | 0  | 19 | RDR2-sensitive |
| AGGTCATGTGGTTTTCCGGCAGGC  | 0  | 11 | RDR2-sensitive |
| AGGTCATGTTAGTCGGGTCGGGTG  | 0  | 14 | RDR2-sensitive |
| AGGTCATTCTATCTTTAAGTCGGT  | 15 | 82 | RDR2-sensitive |
| AGGTCATTGAACCTTGGTATGTTGT | 0  | 11 | RDR2-sensitive |
| AGGTCCCCCTGCTTGACGATGGAC  | 0  | 10 | RDR2-sensitive |
| AGGTCCGAACTCCAGCAGGGTCCC  | 0  | 9  | RDR2-sensitive |
| AGGTCCGAGGGAACAGAAGCGTCG  | 0  | 9  | RDR2-sensitive |
| AGGTCCGGACGAACGAGAGGCCAC  | 0  | 9  | RDR2-sensitive |
| AGGTCCGGATGACTCCAGAAGCAG  | 0  | 10 | RDR2-sensitive |
| AGGTCCTACCGACTCCTGATACGG  | 0  | 18 | RDR2-sensitive |
| AGGTCCTCGAACTTGGCATGTTGT  | 0  | 18 | RDR2-sensitive |
| AGGTCCTGCAGAAAGAGACAGCTT  | 0  | 59 | RDR2-sensitive |
| AGGTCCTGCAGGAAGAAACAGCTT  | 1  | 17 | RDR2-sensitive |
| AGGTCCTGTAGAAAGAGACAGCTT  | 0  | 49 | RDR2-sensitive |
| AGGTCCTGTAGCTGGCGGGCGCCG  | 38 | 1  | RDR2-resistant |
| AGGTCGACCAACTTTGACGTGGAC  | 0  | 16 | RDR2-sensitive |
| AGGTCGAGACGGCCGTCAGTCGGT  | 0  | 9  | RDR2-sensitive |
| AGGTCGCAAAGCTCCGTCGGCTAC  | 18 | 0  | RDR2-resistant |
| AGGTCGCAGCTCATGGACGGACAT  | 0  | 16 | RDR2-sensitive |
| AGGTCGGCAGGCTACCTAAGACGT  | 3  | 18 | RDR2-sensitive |
| AGGTCGGGCTATTTTCGTCGGCCG  | 0  | 10 | RDR2-sensitive |
| AGGTCGGGTGAGAACGTGGGACGG  | 0  | 15 | RDR2-sensitive |
| AGGTCGGTCAGTGGAGCGGCGAAG  | 1  | 25 | RDR2-sensitive |
| AGGTCGGTGTAGTTGACGCGCCAA  | 0  | 40 | RDR2-sensitive |
| AGGTCGTAAAGCTCCATCGGCTAC  | 17 | 1  | RDR2-resistant |



|                           |    |     |                |
|---------------------------|----|-----|----------------|
| AGGTCGTAGTTGGATAAGGTCGGC  | 21 | 2   | RDR2-resistant |
| AGGTCGTGACTGAGCTGCCGGTAG  | 0  | 54  | RDR2-sensitive |
| AGGTCGTGCTTCGGCTGGCGGCTC  | 0  | 22  | RDR2-sensitive |
| AGGTCTAAATGGACTGGATATCGG  | 0  | 12  | RDR2-sensitive |
| AGGTCTAACTGAACAGAGGAAGAT  | 0  | 10  | RDR2-sensitive |
| AGGTCTAATGTGGCGCTGACGGGA  | 3  | 25  | RDR2-sensitive |
| AGGTCTATAGAACGGTTAGGGCAT  | 0  | 11  | RDR2-sensitive |
| AGGTCTCATCTGACTTCTGACGGT  | 0  | 10  | RDR2-sensitive |
| AGGTCTCCGGAACCCCTTCGTCTTC | 25 | 197 | RDR2-sensitive |
| AGGTCTCGACTGATCGACTTCGGC  | 22 | 1   | RDR2-resistant |
| AGGTCTCGGGCAGCACATACTAGG  | 0  | 12  | RDR2-sensitive |
| AGGTCTCTGGCCTAGCCGAAGTGT  | 0  | 10  | RDR2-sensitive |
| AGGTCTGACGAGCTGACACGGTCA  | 0  | 40  | RDR2-sensitive |
| AGGTCTGCAAGCTGATCCTTGGTG  | 42 | 8   | RDR2-resistant |
| AGGTCTGCATGATATTGATGGTTG  | 3  | 28  | RDR2-sensitive |
| AGGTCTGCTACGAAGAAGACGACT  | 0  | 9   | RDR2-sensitive |
| AGGTCTGCTGTGAAGAAGACGATC  | 1  | 17  | RDR2-sensitive |
| AGGTCTGGACCGTGCCGGCACGAC  | 0  | 11  | RDR2-sensitive |
| AGGTCTGGCCGATGGAACAGGCGT  | 0  | 15  | RDR2-sensitive |
| AGGTCTGGCGAGCTGACGCGGTCA  | 0  | 21  | RDR2-sensitive |
| AGGTCTGGGACGAAATAGACTGGC  | 0  | 11  | RDR2-sensitive |
| AGGTCTGGTCGCTGGGACAGGCGC  | 1  | 45  | RDR2-sensitive |
| AGGTCTGGTCGTTGGGACAGGCGC  | 0  | 27  | RDR2-sensitive |
| AGGTCTGTTAAGCGGGACTGGGTC  | 18 | 0   | RDR2-resistant |
| AGGTCTGTTACGAAGAAGATGACT  | 0  | 15  | RDR2-sensitive |
| AGGTCTGTTCCGAAGAATACGCCA  | 0  | 10  | RDR2-sensitive |
| AGGTCTGTTTCCTGGGAGTCTGGC  | 0  | 9   | RDR2-sensitive |
| AGGTCTGTTTGGTTTGATGGCTAA  | 0  | 10  | RDR2-sensitive |
| AGGTCTTATTGGAGCGAAGGCGAA  | 0  | 11  | RDR2-sensitive |
| AGGTCTTCGGAACCCCTTCGTCTTC | 0  | 11  | RDR2-sensitive |
| AGGTCTTGTAGGAAGAAGCAGCTT  | 0  | 18  | RDR2-sensitive |
| AGGTCTTGTAGGAAGAAGCGGCTT  | 1  | 14  | RDR2-sensitive |
| AGGTCTTGTGGTCTGGTCTAGTG   | 0  | 9   | RDR2-sensitive |
| AGGTCTTTTACTCTGCTAGTGGAC  | 0  | 11  | RDR2-sensitive |
| AGGTCTTTTTAACTTGAGTCGGG   | 0  | 13  | RDR2-sensitive |
| AGGTGAACGGACGGACGAACGGTG  | 0  | 59  | RDR2-sensitive |
| AGGTGACATGAGATGGATCCACTC  | 0  | 12  | RDR2-sensitive |
| AGGTGACCGGCATGTAGATGTGGC  | 6  | 26  | RDR2-sensitive |
| AGGTGACGCAGAGGAGGACCGACA  | 0  | 10  | RDR2-sensitive |
| AGGTGACGCCAGAGTAGAAGCAC   | 3  | 32  | RDR2-sensitive |
| AGGTGACGTACTGAAGTAGACGAC  | 0  | 24  | RDR2-sensitive |
| AGGTGACTCGATTGTCCGGACACC  | 0  | 19  | RDR2-sensitive |
| AGGTGACTGGTCCAGAGTTATGGC  | 0  | 9   | RDR2-sensitive |
| AGGTGACTGTTGGAGGTTCCGGTGC | 0  | 14  | RDR2-sensitive |
| AGGTGAGAGGGCAGAACATGGTGC  | 0  | 18  | RDR2-sensitive |
| AGGTGAGCTCGGACGGTCTGCCGC  | 0  | 9   | RDR2-sensitive |
| AGGTGATCGGCTGAAGACGCGCCA  | 0  | 48  | RDR2-sensitive |
| AGGTGATGATGAGCTGGACGGTGT  | 0  | 9   | RDR2-sensitive |
| AGGTGATGTAGACGGACTGACGGT  | 0  | 15  | RDR2-sensitive |

|                           |     |    |                |
|---------------------------|-----|----|----------------|
| AGGTGATTGTAGCCATGCACGGAC  | 0   | 10 | RDR2-sensitive |
| AGGTGCACTAGAGTAGATATCATT  | 127 | 7  | RDR2-resistant |
| AGGTGCACTGGTAGAACAACGGAG  | 0   | 40 | RDR2-sensitive |
| AGGTGCACTGGTGAGACAACGGAG  | 0   | 9  | RDR2-sensitive |
| AGGTGCAGCGGTCCGTAGAGGTAA  | 0   | 9  | RDR2-sensitive |
| AGGTGCATCTACAGGATTGTCCGG  | 1   | 33 | RDR2-sensitive |
| AGGTGCATTTGTTGAACGGGCCGG  | 0   | 10 | RDR2-sensitive |
| AGGTGCCGGCGAATCAGTTTCTG   | 0   | 10 | RDR2-sensitive |
| AGGTGCCGGACAATTCTAGTGCCGT | 10  | 60 | RDR2-sensitive |
| AGGTGCCGGTGTGGTTTGATGGGT  | 0   | 11 | RDR2-sensitive |
| AGGTGCTCTGACCGGCGCGCACGC  | 0   | 13 | RDR2-sensitive |
| AGGTGCTGCAGTGACGACTTTGGA  | 1   | 13 | RDR2-sensitive |
| AGGTGCTGTATGCTGTTTTGATGG  | 56  | 9  | RDR2-resistant |
| AGGTGCTGTGTGAACGGGCCGGTT  | 1   | 18 | RDR2-sensitive |
| AGGTGCTTTTAGGAGTAGGACGGT  | 2   | 16 | RDR2-sensitive |
| AGGTGCTTTTGGGTAGGACGGTGT  | 3   | 20 | RDR2-sensitive |
| AGGTGCTTTTGGAGTAGGACGGT   | 1   | 27 | RDR2-sensitive |
| AGGTGGAATGGTAGAGGAGGATAT  | 0   | 12 | RDR2-sensitive |
| AGGTGGACGATGAGCTGGATGGCG  | 0   | 16 | RDR2-sensitive |
| AGGTGGACGCTTGATCGACGACAA  | 0   | 9  | RDR2-sensitive |
| AGGTGGACTGACTGAGGACGAGGC  | 0   | 28 | RDR2-sensitive |
| AGGTGGACTGACTGAGGATGAGGC  | 0   | 11 | RDR2-sensitive |
| AGGTGGACTGGACAACATGATGGA  | 2   | 14 | RDR2-sensitive |
| AGGTGGACTGGACAGCATGACGGA  | 0   | 15 | RDR2-sensitive |
| AGGTGGACTGGACAGCATGATGGA  | 1   | 32 | RDR2-sensitive |
| AGGTGGACTGGCTGAGGACGAGGC  | 0   | 20 | RDR2-sensitive |
| AGGTGGAGGTTTTAGGTATTCTTT  | 17  | 0  | RDR2-resistant |
| AGGTGGAGTGGTAGAGAAGGGTAT  | 0   | 13 | RDR2-sensitive |
| AGGTGGATAGCGGTGTCAGGGACT  | 21  | 1  | RDR2-resistant |
| AGGTGGATATGCGGAAGGCTACAA  | 2   | 18 | RDR2-sensitive |
| AGGTGGCACTGAACTGGTCGTCCG  | 0   | 19 | RDR2-sensitive |
| AGGTGGCACTGTGGAGAGAAGACC  | 0   | 30 | RDR2-sensitive |
| AGGTGGCACTGTGGAGAGACGACC  | 0   | 24 | RDR2-sensitive |
| AGGTGGCCTGTAGTCCAGCACGGT  | 0   | 13 | RDR2-sensitive |
| AGGTGGCGGCGAACTGAGAGGAAT  | 0   | 9  | RDR2-sensitive |
| AGGTGGCTGTGTGAACGGGCCGGT  | 0   | 15 | RDR2-sensitive |
| AGGTGGGCTTGGGGAGAGATGTAG  | 0   | 9  | RDR2-sensitive |
| AGGTGGTCTGTGGACGAGGCGAGA  | 0   | 22 | RDR2-sensitive |
| AGGTGGTGATCCAATCGTTGGCCA  | 16  | 0  | RDR2-resistant |
| AGGTGGTGTGTAGAGATGGCACAG  | 0   | 9  | RDR2-sensitive |
| AGGTGGTTGATGGATAAGTTGGAT  | 210 | 0  | RDR2-resistant |
| AGGTGTAACCTTTGAACACGGTCT  | 0   | 18 | RDR2-sensitive |
| AGGTGTACATTCGGGCTGCACGGC  | 0   | 19 | RDR2-sensitive |
| AGGTGTAGACTGCAGAGAGGACAG  | 0   | 12 | RDR2-sensitive |
| AGGTGTAGAGCACAGGAACGGTGG  | 0   | 12 | RDR2-sensitive |
| AGGTGTAGCAACAAGGAGTCGGTG  | 0   | 17 | RDR2-sensitive |
| AGGTGTCATGTAGCTGGTTTGTCA  | 95  | 2  | RDR2-resistant |
| AGGTGTCGACCCTGTGCGCCTGGA  | 0   | 12 | RDR2-sensitive |
| AGGTGTCGCAATACGGTAGGGCAT  | 0   | 48 | RDR2-sensitive |

|                           |     |     |                |
|---------------------------|-----|-----|----------------|
| AGGTGTCGGTGCTGGAGTGGGGGC  | 1   | 12  | RDR2-sensitive |
| AGGTGTCTGGACAAGTAGCAGCAT  | 0   | 16  | RDR2-sensitive |
| AGGTGTCTGTAAGTTGGTGTCTGA  | 0   | 9   | RDR2-sensitive |
| AGGTGTCTGTTAGAAAAGGTGTCT  | 1   | 40  | RDR2-sensitive |
| AGGTGTGACTGTTCGATTCGGCCGC | 0   | 37  | RDR2-sensitive |
| AGGTGTGATTGTAAGAAACAAGGC  | 20  | 0   | RDR2-resistant |
| AGGTGTGATTGTATAGGGACGCTA  | 0   | 10  | RDR2-sensitive |
| AGGTGTGCACTGTAGCGACGGTGG  | 0   | 11  | RDR2-sensitive |
| AGGTGTGCAGTACATGGACGGTAA  | 0   | 9   | RDR2-sensitive |
| AGGTGTGGACGCTGACGGTACTAT  | 0   | 15  | RDR2-sensitive |
| AGGTGTGGGCATAAGAGGAAGGAG  | 1   | 17  | RDR2-sensitive |
| AGGTGTGTCTCAAGTCGCCGGGT   | 0   | 10  | RDR2-sensitive |
| AGGTGTTAGCGACTCGGTGGAAGA  | 0   | 33  | RDR2-sensitive |
| AGGTGTTAGTCTGTTAGGATGGAT  | 0   | 12  | RDR2-sensitive |
| AGGTGTTCAAGTGTACAGCCGG    | 0   | 10  | RDR2-sensitive |
| AGGTGTTCTTTTTAGGATCTTCGG  | 0   | 22  | RDR2-sensitive |
| AGGTGTTGATGGACTGTTTGGTAG  | 16  | 0   | RDR2-resistant |
| AGGTGTTGCTAGTAGAACGGACGG  | 0   | 51  | RDR2-sensitive |
| AGGTGTTGGAGGCTTATACCCTGA  | 39  | 0   | RDR2-resistant |
| AGGTGTTGTTGAATGGTCATGAGA  | 295 | 0   | RDR2-resistant |
| AGGTGTTTGGCATGCTCTAGCTAG  | 0   | 12  | RDR2-sensitive |
| AGGTGTTTTAGGAGTAGGACGGTG  | 8   | 24  | RDR2-sensitive |
| AGGTGTTTTTAGGAGTAGGACGGT  | 26  | 291 | RDR2-sensitive |
| AGGTGTTTTTCGGACCTTCGGCTT  | 2   | 37  | RDR2-sensitive |
| AGGTTAAACCATGTTCGGGCCACGG | 0   | 10  | RDR2-sensitive |
| AGGTTAACGGGCCGTATCAGACTG  | 0   | 11  | RDR2-sensitive |
| AGGTTAAGAAGGTATGATAACTAT  | 51  | 2   | RDR2-resistant |
| AGGTTACAGAGTAGGCGTGACACAC | 0   | 10  | RDR2-sensitive |
| AGGTTATACATAGATCTGAATCGT  | 0   | 10  | RDR2-sensitive |
| AGGTTATACCCTCAGCCGTTCGGT  | 0   | 14  | RDR2-sensitive |
| AGGTTATCGTACTGGCCTCGGCCGT | 0   | 18  | RDR2-sensitive |
| AGGTTCAAGATCATCGGAGCGCAT  | 0   | 9   | RDR2-sensitive |
| AGGTTCAGATTGTGCGGATCCGGC  | 0   | 10  | RDR2-sensitive |
| AGGTTCAGGATCATCGGAGCGCAT  | 0   | 10  | RDR2-sensitive |
| AGGTTCCCTGTAGTAGTGACGGGC  | 0   | 14  | RDR2-sensitive |
| AGGTTCCCTGTAGTAGTGAGGTAT  | 0   | 15  | RDR2-sensitive |
| AGGTTCCCTACAGGAGAGGATCGTG | 31  | 0   | RDR2-resistant |
| AGGTTCCGATGGCTCCAGGAGCGA  | 0   | 10  | RDR2-sensitive |
| AGGTTCCGGCTCGACTCGACGACGG | 1   | 25  | RDR2-sensitive |
| AGGTTCCGGCCGCTTAGAGAGGCG  | 0   | 9   | RDR2-sensitive |
| AGGTTCCGGCGGGCTATAAAAACAC | 0   | 10  | RDR2-sensitive |
| AGGTTCCGGCTGCTGCAAGGTGTA  | 0   | 12  | RDR2-sensitive |
| AGGTTCCGTGAGTCGGCTCGGCTGG | 0   | 9   | RDR2-sensitive |
| AGGTTCTCCCCTTTTTGTCCGGCC  | 0   | 70  | RDR2-sensitive |
| AGGTTCTCCTAGGTCGTCTTAC    | 0   | 45  | RDR2-sensitive |
| AGGTTCTCTGAAGACTACCTGCAT  | 0   | 13  | RDR2-sensitive |
| AGGTTCTGAACACTGATAGTTGGC  | 0   | 35  | RDR2-sensitive |
| AGGTTCTGCCACGCCTGATCTCGG  | 0   | 22  | RDR2-sensitive |
| AGGTTCTGGAGACTTCTACAGAAG  | 0   | 9   | RDR2-sensitive |

|                           |     |    |                |
|---------------------------|-----|----|----------------|
| AGGTTCTGTCCGGAGCGTGCGGGA  | 1   | 12 | RDR2-sensitive |
| AGGTTCTGTCCGGAGCGTGCGGGA  | 0   | 15 | RDR2-sensitive |
| AGGTTGAAGAGGCTGATCAGGCAA  | 0   | 15 | RDR2-sensitive |
| AGGTTGAAGTAGATTACATCGGAT  | 71  | 0  | RDR2-resistant |
| AGGTTGATGGAGGAGTGTGACGGC  | 54  | 2  | RDR2-resistant |
| AGGTTGATTAATTTGTACGGCTC   | 106 | 1  | RDR2-resistant |
| AGGTTGCAGGATGGCAGAACGGCA  | 0   | 21 | RDR2-sensitive |
| AGGTTGCCTCTGGGTTCGAGTCGGG | 0   | 10 | RDR2-sensitive |
| AGGTTGCCTGTGAGGCGAGGTCGG  | 0   | 11 | RDR2-sensitive |
| AGGTTGCTGGGAAGAGAGCGGACT  | 0   | 9  | RDR2-sensitive |
| AGGTTGGAGACTGTTGGCGGCTAG  | 0   | 11 | RDR2-sensitive |
| AGGTTGGAGCAACAGGATCGACGA  | 0   | 11 | RDR2-sensitive |
| AGGTTGGATCGACGTAGAGGCAGT  | 1   | 27 | RDR2-sensitive |
| AGGTTGGCACTGGCGGAAACGCGG  | 0   | 19 | RDR2-sensitive |
| AGGTTGGGGTGGTGGATGTCGCGG  | 23  | 1  | RDR2-resistant |
| AGGTTGGGTGAGGACGTGGGACGG  | 0   | 20 | RDR2-sensitive |
| AGGTTGGTTCGGCACTCGGCAGCCC | 1   | 15 | RDR2-sensitive |
| AGGTTGTACGAATACGGCGAACTG  | 0   | 10 | RDR2-sensitive |
| AGGTTGTAGAGGTAATCGGCCTAG  | 0   | 21 | RDR2-sensitive |
| AGGTTGTATGAGTGGCTAATGGTT  | 15  | 0  | RDR2-resistant |
| AGGTTGTATGGCTTGGTCTCTCGG  | 0   | 11 | RDR2-sensitive |
| AGGTTGTGGACTGTCCGGCCCTTG  | 0   | 13 | RDR2-sensitive |
| AGGTTGTTGGGCGTCATAGTCTAT  | 0   | 10 | RDR2-sensitive |
| AGGTTTACGAGAGCTGACGACATG  | 34  | 2  | RDR2-resistant |
| AGGTTTATTAGACTGGCAGTACCT  | 15  | 0  | RDR2-resistant |
| AGGTTTCGGATAACTGGAGTCGGT  | 0   | 18 | RDR2-sensitive |
| AGGTTTCGGATAGCGGGTACCCAT  | 0   | 52 | RDR2-sensitive |
| AGGTTTCGTAGAGCAGGAAGAGAA  | 0   | 10 | RDR2-sensitive |
| AGGTTTCGTAGAGCAGGAGAGGAA  | 0   | 12 | RDR2-sensitive |
| AGGTTTCGTAGAGCAGGAGGGGAA  | 1   | 49 | RDR2-sensitive |
| AGGTTTGCGAGAACCGAACCTCGG  | 3   | 36 | RDR2-sensitive |
| AGGTTTGCTGTAGTAGTGCAGCA   | 0   | 25 | RDR2-sensitive |
| AGGTTTGGAATTGCAATTGAGGCA  | 20  | 1  | RDR2-resistant |
| AGGTTTGGAAGTGGTTCGCGCCT   | 0   | 13 | RDR2-sensitive |
| AGGTTTTCTGCCTGACGTCCGGA   | 4   | 25 | RDR2-sensitive |
| AGGTTTTCGAGAGCTGACGTCATG  | 32  | 5  | RDR2-resistant |
| AGGTTTTCTCCTGTTCTCGGACA   | 20  | 2  | RDR2-resistant |
| AGGTTTTGGAAGTATGAACCGGTT  | 415 | 69 | RDR2-resistant |
| AGGTTTTGTAAGTATGAACCGGTT  | 205 | 0  | RDR2-resistant |
| AGGTTTTGTAGAGCAGGAGGGGAA  | 0   | 15 | RDR2-sensitive |
| AGGTTTTTCGAAGTGGTCTGGGT   | 40  | 1  | RDR2-resistant |
| AGGTTTTTTACTTTTTATCCATCA  | 14  | 0  | RDR2-resistant |
| AGGTTTTTTGTAGACGAGCCGAAT  | 0   | 20 | RDR2-sensitive |
| AGTAAACTTTGGATAGACTGCTGC  | 0   | 9  | RDR2-sensitive |
| AGTAAAGGTAGTCGTTTAGGACAT  | 0   | 13 | RDR2-sensitive |
| AGTAAATAAAGCATATCTCGTCGT  | 1   | 13 | RDR2-sensitive |
| AGTAACGGACGTCTCTGATGGCGT  | 0   | 9  | RDR2-sensitive |
| AGTAACTCTGCAAGGTGGGACCGA  | 1   | 13 | RDR2-sensitive |
| AGTAACTCTGCAAGGTGGGACCGC  | 2   | 28 | RDR2-sensitive |

|                           |    |     |                |
|---------------------------|----|-----|----------------|
| AGTAACTCTGCAAGGTGGGGCCGC  | 1  | 19  | RDR2-sensitive |
| AGTAAGCCGACGGACCACGAGCAT  | 0  | 15  | RDR2-sensitive |
| AGTAAGTCGAAAGGAGCATGGCAT  | 0  | 49  | RDR2-sensitive |
| AGTAATGTTCTTGTAGTTTGATGG  | 24 | 1   | RDR2-resistant |
| AGTAATTGGCGTCCGGATCGGTGT  | 0  | 9   | RDR2-sensitive |
| AGTACAAGGGTCGGTGGAGCGGAC  | 0  | 31  | RDR2-sensitive |
| AGTACACGCGGCAGAAAGTCAGAGC | 0  | 11  | RDR2-sensitive |
| AGTACACTCGGCACAGGACGACAC  | 0  | 15  | RDR2-sensitive |
| AGTACACTCGGCATATCCAGACAC  | 0  | 9   | RDR2-sensitive |
| AGTACAGCTTCGGATTCGGGTCCGG | 3  | 23  | RDR2-sensitive |
| AGTACAGGACTGTAGATAGGGCAT  | 0  | 9   | RDR2-sensitive |
| AGTACATCAGACCTGCGAGGACGT  | 0  | 18  | RDR2-sensitive |
| AGTACCCACTGTAGATGACAGCAA  | 0  | 17  | RDR2-sensitive |
| AGTACCGAGCTTGGACTGCGGCGT  | 4  | 160 | RDR2-sensitive |
| AGTACCGTTGGATGTAGATGGTGT  | 3  | 194 | RDR2-sensitive |
| AGTACCTGAAAGAGCGCTAGGCAT  | 0  | 10  | RDR2-sensitive |
| AGTACGATGGACTAGCACGAGCAT  | 0  | 12  | RDR2-sensitive |
| AGTACGGACTCACAGTACGGATGT  | 0  | 20  | RDR2-sensitive |
| AGTACTACTGTTTTTGGACGGCC   | 1  | 177 | RDR2-sensitive |
| AGTACTAGGCTGCAGATGGGGCAT  | 0  | 9   | RDR2-sensitive |
| AGTACTAGTGATTGACGTCTGGAT  | 0  | 32  | RDR2-sensitive |
| AGTACTAGTGGCAACTGCTCGAAG  | 43 | 2   | RDR2-resistant |
| AGTACTATCTACCAGGTCGTGGAC  | 0  | 10  | RDR2-sensitive |
| AGTACTCGGCGTGAGTAGAGCGGT  | 0  | 13  | RDR2-sensitive |
| AGTACTCGGTTGCAGATGGAGCAT  | 0  | 10  | RDR2-sensitive |
| AGTACTCTGGCTGCCTGACGACGC  | 0  | 20  | RDR2-sensitive |
| AGTACTGGCCTGCTTCAGACGACT  | 0  | 17  | RDR2-sensitive |
| AGTACTGGGATGTAGATGGGGCAT  | 0  | 20  | RDR2-sensitive |
| AGTACTGGGCTGCAAATGGGGCAT  | 0  | 9   | RDR2-sensitive |
| AGTACTGGGCTGCAGATGGGGCAT  | 0  | 27  | RDR2-sensitive |
| AGTACTGTAGCACCGGTAGGAGCA  | 0  | 12  | RDR2-sensitive |
| AGTACTGTAGCACCGGTAGGGGCA  | 0  | 27  | RDR2-sensitive |
| AGTACTGTATCGAATTATTAGGCC  | 0  | 18  | RDR2-sensitive |
| AGTACTGTGACGGAACCTCCCAAG  | 0  | 36  | RDR2-sensitive |
| AGTACTGTGAGCAGGTGCAGACGC  | 41 | 0   | RDR2-resistant |
| AGTACTGTGCCAGAATCGAAGCAT  | 2  | 54  | RDR2-sensitive |
| AGTACTTAAGGTTGTCAGATGTTC  | 20 | 1   | RDR2-resistant |
| AGTACTTAGAGTCTGATTGGTTGC  | 0  | 26  | RDR2-sensitive |
| AGTACTTGAGCCCTGTAGAAGCGC  | 0  | 18  | RDR2-sensitive |
| AGTACTTGTGCAGATTTGTGGATT  | 23 | 1   | RDR2-resistant |
| AGTACTTTGGTTGTTGATCTCGGC  | 1  | 13  | RDR2-sensitive |
| AGTACTTTTTATCGGACACTCGGC  | 1  | 37  | RDR2-sensitive |
| AGTACTTTTTCTCGGGCACTCGGC  | 18 | 62  | RDR2-sensitive |
| AGTACTTTTTGTGCGGGCACTCGGC | 15 | 87  | RDR2-sensitive |
| AGTAGAAACCGGCACACATCTCTT  | 0  | 11  | RDR2-sensitive |
| AGTAGAAACCTTGTCGGAAGGCGT  | 5  | 25  | RDR2-sensitive |
| AGTAGAACACTCGGCATAGACCGT  | 0  | 10  | RDR2-sensitive |
| AGTAGAACCGGACATTCGGCCACA  | 0  | 16  | RDR2-sensitive |
| AGTAGAACGAGACCAGGACGACAC  | 0  | 19  | RDR2-sensitive |

|                           |    |     |                |
|---------------------------|----|-----|----------------|
| AGTAGAACGAGGCGAGGACGACAC  | 0  | 21  | RDR2-sensitive |
| AGTAGAACCGGTGACTGCTGGTCC  | 0  | 12  | RDR2-sensitive |
| AGTAGAACGGACGGACGGTGCAGA  | 0  | 9   | RDR2-sensitive |
| AGTAGAACGGTAGAACCACGGTGG  | 0  | 12  | RDR2-sensitive |
| AGTAGAACGTGATCTCGACGCCAT  | 0  | 18  | RDR2-sensitive |
| AGTAGAAGGGTTGGCTGGCTGCAT  | 0  | 169 | RDR2-sensitive |
| AGTAGAAGGGTTGGCTGGCTGCCT  | 0  | 11  | RDR2-sensitive |
| AGTAGACAAGCTCTGCAACGGCGC  | 1  | 34  | RDR2-sensitive |
| AGTAGACACGGACGCGGAGGGCAT  | 1  | 13  | RDR2-sensitive |
| AGTAGACCGCTGCGGACATTTGTT  | 0  | 11  | RDR2-sensitive |
| AGTAGACGATAGAGCGGCTCGCTG  | 0  | 15  | RDR2-sensitive |
| AGTAGACGCATAGCCGACGAGCAT  | 0  | 9   | RDR2-sensitive |
| AGTAGACGGTACTGTCACCACTGC  | 0  | 12  | RDR2-sensitive |
| AGTAGACTGAACTGCTGCAGCCGT  | 2  | 16  | RDR2-sensitive |
| AGTAGACTGAATGGAGATGGCCGC  | 0  | 12  | RDR2-sensitive |
| AGTAGACTGGCCTCTGAACGGGCA  | 2  | 15  | RDR2-sensitive |
| AGTAGACTGGCCTCTGGACGGGCA  | 5  | 24  | RDR2-sensitive |
| AGTAGAGACCGGTGTGTGCTCCAA  | 0  | 12  | RDR2-sensitive |
| AGTAGAGACTTGTGCATCCATTCC  | 0  | 12  | RDR2-sensitive |
| AGTAGAGCGCATGATTGGCTTCCT  | 0  | 11  | RDR2-sensitive |
| AGTAGAGGGCGTATCACTCAGCAC  | 0  | 11  | RDR2-sensitive |
| AGTAGAGTTCTCGGCTGCAGCGTT  | 0  | 17  | RDR2-sensitive |
| AGTAGATATAGGAGATGGAATCTT  | 1  | 14  | RDR2-sensitive |
| AGTAGATCACTGTGGTGCCTGCAC  | 0  | 18  | RDR2-sensitive |
| AGTAGATGTAAATTCATTCCGCAT  | 14 | 0   | RDR2-resistant |
| AGTAGCAAGGTCTCGGGCAGCACA  | 0  | 9   | RDR2-sensitive |
| AGTAGCACGGAAGGGACGCTGCAT  | 1  | 16  | RDR2-sensitive |
| AGTAGCACTGGACAAGCACTGCGC  | 1  | 15  | RDR2-sensitive |
| AGTAGCCAAGTAGAACGGAGTCGT  | 0  | 19  | RDR2-sensitive |
| AGTAGCCTTTGGACTACACTCGGT  | 0  | 14  | RDR2-sensitive |
| AGTAGCGACTGTCCGAGGCGTGAT  | 0  | 9   | RDR2-sensitive |
| AGTAGCTGAGAGCGTTGCGTGGAC  | 0  | 9   | RDR2-sensitive |
| AGTAGCTGATAGAGCGTTGCGCGG  | 0  | 9   | RDR2-sensitive |
| AGTAGCTGGCTGCACGGACGTCGG  | 0  | 10  | RDR2-sensitive |
| AGTAGGAATGGACGTCATTCTGAT  | 0  | 10  | RDR2-sensitive |
| AGTAGGACACTCGGCATAGATAGA  | 0  | 12  | RDR2-sensitive |
| AGTAGGACGTCTGGAGCGGCGAAA  | 0  | 9   | RDR2-sensitive |
| AGTAGGACTGGGCATAAAACCCGA  | 0  | 9   | RDR2-sensitive |
| AGTAGGAGGATACGGTGCCTACTGT | 22 | 1   | RDR2-resistant |
| AGTAGGATAAGTCGGGGGCGTCAC  | 0  | 9   | RDR2-sensitive |
| AGTAGGATGAGACAGGGGCGCCAC  | 0  | 12  | RDR2-sensitive |
| AGTAGGATGAGACGGAGATGACAT  | 0  | 9   | RDR2-sensitive |
| AGTAGGATGAGGTGGAGGCGACAT  | 0  | 10  | RDR2-sensitive |
| AGTAGGATGAGTCGGAGACGCCAC  | 0  | 48  | RDR2-sensitive |
| AGTAGGATGAGTCGGGGACGCCAC  | 0  | 11  | RDR2-sensitive |
| AGTAGGATGAGTCGGGGGCGCCAC  | 0  | 30  | RDR2-sensitive |
| AGTAGGGATGAAAACGGGACGGAT  | 0  | 9   | RDR2-sensitive |
| AGTAGGGCTCGTGCTGAGATCGCC  | 1  | 12  | RDR2-sensitive |
| AGTAGGGTACGTAGCGGGAGTGTT  | 29 | 1   | RDR2-resistant |

|                            |      |     |                |
|----------------------------|------|-----|----------------|
| AGTAGGGTGTTACGCTCCGGCGGC   | 0    | 16  | RDR2-sensitive |
| AGTAGTCGGCATATGCTACGAAGT   | 0    | 9   | RDR2-sensitive |
| AGTAGTCGTGCTGGGCAGAATCGC   | 0    | 15  | RDR2-sensitive |
| AGTAGTGCCTCTGACATGTGAGGC   | 0    | 9   | RDR2-sensitive |
| AGTAGTGCTCTGTGCAAAGAGGCG   | 0    | 34  | RDR2-sensitive |
| AGTAGTGGAAAGGCCGGGCTGGGCAG | 1593 | 261 | RDR2-resistant |
| AGTAGTGGAAAGGCCGGGCTGGGCCG | 71   | 11  | RDR2-resistant |
| AGTAGTGGATTGGGCATGTTTCGTT  | 3    | 19  | RDR2-sensitive |
| AGTAGTGTAGACCATATGCCGTGT   | 47   | 1   | RDR2-resistant |
| AGTAGTGTGAGCCGCTGAAGACTG   | 0    | 11  | RDR2-sensitive |
| AGTAGTGTGTTGTTGGTTCGTTGT   | 1    | 13  | RDR2-sensitive |
| AGTATAACGAGCCGAGCCGAGCTG   | 0    | 10  | RDR2-sensitive |
| AGTATACGGCTGCAGCAGTTCAGT   | 0    | 13  | RDR2-sensitive |
| AGTATAGACTGTACTGTTCCGCGGA  | 0    | 12  | RDR2-sensitive |
| AGTATAGTCTGATTGTAGGTGGTA   | 0    | 12  | RDR2-sensitive |
| AGTATAGTGTCTGTCTGGACGTC    | 0    | 11  | RDR2-sensitive |
| AGTATATATCTTTTTGAGTCGGAC   | 0    | 10  | RDR2-sensitive |
| AGTATATGGACTGAAATGTGCATG   | 34   | 2   | RDR2-resistant |
| AGTATCACGACTGTATAGGATGGT   | 6    | 60  | RDR2-sensitive |
| AGTATCAGATCGGATTGGTCCGCA   | 0    | 11  | RDR2-sensitive |
| AGTATCGGTGTAACACGGCTCGAC   | 0    | 9   | RDR2-sensitive |
| AGTATCTGATTACGGTTGACTAA    | 0    | 35  | RDR2-sensitive |
| AGTATCTGCACACGGCACGGTCTA   | 0    | 10  | RDR2-sensitive |
| AGTATGAATCTACTGGTGCTCGTT   | 16   | 0   | RDR2-resistant |
| AGTATGACTGTTATGTATGGCCAA   | 0    | 10  | RDR2-sensitive |
| AGTATGGACTAGTAGCATACCGGT   | 0    | 28  | RDR2-sensitive |
| AGTATGGGACAGCGACCAGCACGA   | 0    | 17  | RDR2-sensitive |
| AGTATGGTAGGGCTGACGCGGTGC   | 1    | 39  | RDR2-sensitive |
| AGTATTAGGGTAGAGGCCGGACAA   | 0    | 19  | RDR2-sensitive |
| AGTATTAGTGGAGGGAGAGGGCTG   | 0    | 16  | RDR2-sensitive |
| AGTATTCTGTATTGTAGATTGCAT   | 0    | 11  | RDR2-sensitive |
| AGTATTGGGTTGTAGGTGGGGCAT   | 0    | 12  | RDR2-sensitive |
| AGTATTTAGTCGGGTCGGGTTGGC   | 0    | 30  | RDR2-sensitive |
| AGTATTTCCGGTCCGTCTGACAAC   | 0    | 18  | RDR2-sensitive |
| AGTATTTTCGGTGGTAGTGCCAA    | 76   | 7   | RDR2-resistant |
| AGTATTTTGTTGTCGGGACGGAT    | 0    | 14  | RDR2-sensitive |
| AGTCAAACATTGATCTAGGAGACC   | 25   | 2   | RDR2-resistant |
| AGTCAAACCCGGTCGTTGGATGAC   | 0    | 10  | RDR2-sensitive |
| AGTCAAACGCTTGATGTGACCCGG   | 0    | 13  | RDR2-sensitive |
| AGTCAAACGCTTGATGTGACTCGG   | 0    | 32  | RDR2-sensitive |
| AGTCAAGACATGCGGAGGACATAG   | 0    | 9   | RDR2-sensitive |
| AGTCAAGCGGAGCGAGGTGAACAC   | 0    | 22  | RDR2-sensitive |
| AGTCACATGGATTTGTTGATGGAT   | 0    | 12  | RDR2-sensitive |
| AGTCACCGGAGTTCGTATGACTGG   | 0    | 9   | RDR2-sensitive |
| AGTCACCTGGTGCCGAAGACGTCG   | 3    | 19  | RDR2-sensitive |
| AGTCACGGATACAGTTGACCGCTG   | 1    | 34  | RDR2-sensitive |
| AGTCACGGTTGACTGGGAGACGAT   | 0    | 10  | RDR2-sensitive |
| AGTCACTGTAGCTGTCCGGTGCGC   | 0    | 11  | RDR2-sensitive |
| AGTCAGAACTCGTCGACTACGGTT   | 0    | 13  | RDR2-sensitive |

|                           |     |     |                |
|---------------------------|-----|-----|----------------|
| AGTCAGAGCTCCAACGGTCGGAAC  | 1   | 12  | RDR2-sensitive |
| AGTCAGCCCGTCGGGCGGCACGGC  | 0   | 9   | RDR2-sensitive |
| AGTCAGTAGGTCGTCATGACGCGT  | 0   | 10  | RDR2-sensitive |
| AGTCATATAGCTAGTCTGTCCGAG  | 1   | 12  | RDR2-sensitive |
| AGTCATCATTAGATCTAGATCGGA  | 1   | 25  | RDR2-sensitive |
| AGTCATCGGACCATGCCGGCACGG  | 0   | 9   | RDR2-sensitive |
| AGTCATGCGAGACAGACTGGAGGC  | 0   | 20  | RDR2-sensitive |
| AGTCATTTTTTCGTCGTAGGTGT   | 0   | 10  | RDR2-sensitive |
| AGTCCACCGCTGCATCGTTTTGTGA | 0   | 9   | RDR2-sensitive |
| AGTCCACTGTCGTCAGCGTCGGAC  | 0   | 24  | RDR2-sensitive |
| AGTCCAGACTGTTGGCAGCGGCAA  | 0   | 13  | RDR2-sensitive |
| AGTCCAGGACTGCAGGGACGGTGC  | 0   | 24  | RDR2-sensitive |
| AGTCCATCTTGATATGTGACGGT   | 0   | 14  | RDR2-sensitive |
| AGTCCCTCGAACGGTCGCCGGGAA  | 8   | 47  | RDR2-sensitive |
| AGTCCGATCGGCATGTCTAGGTAC  | 0   | 16  | RDR2-sensitive |
| AGTCCGCAGCAGCTTTTGGTGGCC  | 0   | 10  | RDR2-sensitive |
| AGTCCGCGACCAGACGTCAGAGGCT | 1   | 15  | RDR2-sensitive |
| AGTCCGCGGACTTAGACGGCCCGA  | 0   | 15  | RDR2-sensitive |
| AGTCCGGAECTCCAAGAAGGCAT   | 0   | 12  | RDR2-sensitive |
| AGTCCGGACCGTTTAGGCCTATAG  | 0   | 10  | RDR2-sensitive |
| AGTCCGGATGTACACAAAGGAGGA  | 0   | 28  | RDR2-sensitive |
| AGTCCGGATTAGAAAGCAGGTCGT  | 0   | 24  | RDR2-sensitive |
| AGTCCGGCACGGTAGAATAAGCGG  | 0   | 14  | RDR2-sensitive |
| AGTCCGGCTCTGCGATCTCACGGC  | 144 | 61  | RDR2-resistant |
| AGTCCGGTGAGGTCGATCTCGGGC  | 1   | 12  | RDR2-sensitive |
| AGTCCGTAGCAGCTTTTGGTGGCC  | 0   | 10  | RDR2-sensitive |
| AGTCCGTAGCGTGACAGAAGTCGG  | 0   | 31  | RDR2-sensitive |
| AGTCCTAGACTGTCTCGGCAACAC  | 0   | 16  | RDR2-sensitive |
| AGTCCTAGATCGTGGACCGACGCC  | 0   | 11  | RDR2-sensitive |
| AGTCCTCGACCACGTCGGCAACAC  | 0   | 9   | RDR2-sensitive |
| AGTCCTGCGACGGCGCACAGACTC  | 19  | 0   | RDR2-resistant |
| AGTCCTGTAGACTGTCCGGTGCGC  | 0   | 10  | RDR2-sensitive |
| AGTCCTGTAGACTGTCCGGTGTGC  | 3   | 33  | RDR2-sensitive |
| AGTCCTGTGAGCACGGCACTGTA   | 1   | 35  | RDR2-sensitive |
| AGTCCTTGATATAGTAGTCGTCGA  | 1   | 13  | RDR2-sensitive |
| AGTCCTTGGTGGCCGTCGGACATA  | 3   | 24  | RDR2-sensitive |
| AGTCCTTGACTGTGCCGAAGA     | 37  | 4   | RDR2-resistant |
| AGTCGACAGAGCCGAAGTGACCGC  | 5   | 33  | RDR2-sensitive |
| AGTCGACATGGCCATACATCTGAT  | 0   | 13  | RDR2-sensitive |
| AGTCGAGTTGTCGACCGTCGGTG   | 0   | 9   | RDR2-sensitive |
| AGTCGATCGTTGGTCACTTGGCAC  | 0   | 19  | RDR2-sensitive |
| AGTCGATTGAATCGGTCTCGGCC   | 0   | 13  | RDR2-sensitive |
| AGTCGCGGGCGGATATTATCTATG  | 0   | 11  | RDR2-sensitive |
| AGTCGCTTGAGCTTTCGTCCGAAT  | 51  | 9   | RDR2-resistant |
| AGTCGTAGACGGCTGTCAGGAGTA  | 0   | 10  | RDR2-sensitive |
| AGTCGTGCTCGGACCGGACTGGCA  | 0   | 42  | RDR2-sensitive |
| AGTCGTGTCGCGACCTGGACGGCT  | 1   | 12  | RDR2-sensitive |
| AGTCGTTTAGAACATGATTGTGCA  | 0   | 9   | RDR2-sensitive |
| AGTCGTTTAGGACATGATTGTGCA  | 7   | 208 | RDR2-sensitive |



|                           |    |    |                |
|---------------------------|----|----|----------------|
| AGTCTAAGATGTAGAAGTGATGGT  | 0  | 10 | RDR2-sensitive |
| AGTCTACGGCTCTGGGCTAGACGG  | 1  | 22 | RDR2-sensitive |
| AGTCTAGACCACAGAACCTCCGGC  | 0  | 9  | RDR2-sensitive |
| AGTCTAGTCGTGCTCGGACCGGAC  | 0  | 15 | RDR2-sensitive |
| AGTCTAGTGCAGTTCTGAGCGTCG  | 0  | 10 | RDR2-sensitive |
| AGTCTATAAATGTAAGTGGTCGTA  | 44 | 5  | RDR2-resistant |
| AGTCTATAGGTCTGTTTGGTTCCGG | 0  | 10 | RDR2-sensitive |
| AGTCTATCCGTCTGATTGGTTGCA  | 0  | 11 | RDR2-sensitive |
| AGTCTATCGCGTAGGACAGTTCGG  | 0  | 12 | RDR2-sensitive |
| AGTCTATGACACTGAGCTGGACGG  | 0  | 15 | RDR2-sensitive |
| AGTCTATGTTGATGATCGCGAGGA  | 24 | 0  | RDR2-resistant |
| AGTCTCAACGGTCGATCGTCGTGC  | 34 | 2  | RDR2-resistant |
| AGTCTCAGTACTAGAACAGAGCGG  | 0  | 12 | RDR2-sensitive |
| AGTCTCATCGTTTGGAGCGGCTTC  | 0  | 13 | RDR2-sensitive |
| AGTCTCGGACGCAGACGTGCCCT   | 0  | 10 | RDR2-sensitive |
| AGTCTCGGCGAACTGTACATCGGC  | 0  | 11 | RDR2-sensitive |
| AGTCTCGGCGAACTGTATATCGGC  | 0  | 12 | RDR2-sensitive |
| AGTCTCGGTAAGTGTACATCGGC   | 0  | 31 | RDR2-sensitive |
| AGTCTCGGTGAAGTGTACATCGGC  | 0  | 9  | RDR2-sensitive |
| AGTCTCGTTGTATACTGTTGGCTG  | 0  | 25 | RDR2-sensitive |
| AGTCTCTAGAACCGCGGCAATTCTT | 2  | 15 | RDR2-sensitive |
| AGTCTCTGTAGAGTGGCAGATTCCG | 39 | 0  | RDR2-resistant |
| AGTCTGAACAGCTGTAGCAGGTGT  | 0  | 14 | RDR2-sensitive |
| AGTCTGAACCGCTGCAGCAGGTGT  | 1  | 22 | RDR2-sensitive |
| AGTCTGAACGTATGCAGAGCAGCC  | 0  | 9  | RDR2-sensitive |
| AGTCTGAAGTGAAGTTTGTGGCC   | 0  | 10 | RDR2-sensitive |
| AGTCTGAAGACGGATGAAAACATA  | 60 | 0  | RDR2-resistant |
| AGTCTGATTTTTGGACTTGTCCGGT | 0  | 14 | RDR2-sensitive |
| AGTCTGCAGCAGCTTTTGTATGGTC | 0  | 11 | RDR2-sensitive |
| AGTCTGCATGATACTGATGGTTGC  | 1  | 37 | RDR2-sensitive |
| AGTCTGCATGATACTGATGGTTGT  | 1  | 18 | RDR2-sensitive |
| AGTCTGCGGTGTAGTTTGGACGGT  | 0  | 20 | RDR2-sensitive |
| AGTCTGGAGATGTAGCACCGGCGC  | 2  | 21 | RDR2-sensitive |
| AGTCTGGCGGACACGGATTAGGAT  | 0  | 10 | RDR2-sensitive |
| AGTCTGTAGCAGCTTTTGTATGGCC | 0  | 40 | RDR2-sensitive |
| AGTCTGTAGCAGCTTTTGGTGGCC  | 0  | 77 | RDR2-sensitive |
| AGTCTGTAGGCCGACATGACGCGC  | 0  | 12 | RDR2-sensitive |
| AGTCTGTAGGGGTAAGACGGACGA  | 0  | 13 | RDR2-sensitive |
| AGTCTGTATCTCGGATTTCCGGGCA | 0  | 36 | RDR2-sensitive |
| AGTCTGTATGATACTGATGGTTGC  | 1  | 39 | RDR2-sensitive |
| AGTCTGTATGATACTGATGGTTGT  | 2  | 41 | RDR2-sensitive |
| AGTCTGTATGGACGGATTCAGAGA  | 0  | 19 | RDR2-sensitive |
| AGTCTGTATTATTTTATGTCCGAT  | 1  | 57 | RDR2-sensitive |
| AGTCTGTCCGCTAGGACAATTCGG  | 0  | 26 | RDR2-sensitive |
| AGTCTGTCCGCTAGGACAGTTCGG  | 0  | 13 | RDR2-sensitive |
| AGTCTGTGAACCTCCGCTGCGACGG | 0  | 15 | RDR2-sensitive |
| AGTCTGTGAACCTGCGCTGCGACGG | 0  | 10 | RDR2-sensitive |
| AGTCTGTGAACCTTCGCTGCGACGG | 0  | 30 | RDR2-sensitive |
| AGTCTGTTGGAACGCACGGTGCAA  | 0  | 10 | RDR2-sensitive |

|                            |     |    |                |
|----------------------------|-----|----|----------------|
| AGTCTGTTGGATTGTTATTCAGGC   | 173 | 30 | RDR2-resistant |
| AGTCTTAGACAGATCGCAGCGGTA   | 0   | 10 | RDR2-sensitive |
| AGTCTTCCACGTCGGTCACGTCAT   | 0   | 11 | RDR2-sensitive |
| AGTCTTCGATCGAGCAGCTGACGA   | 0   | 9  | RDR2-sensitive |
| AGTCTTCGGATTGACTGTCGCTAG   | 3   | 29 | RDR2-sensitive |
| AGTCTTCGTCGATGACAGCACGGT   | 1   | 20 | RDR2-sensitive |
| AGTCTTGCCTGAACTGTATATCGG   | 0   | 12 | RDR2-sensitive |
| AGTCTTGGATATAGAGTTGTAGGC   | 27  | 3  | RDR2-resistant |
| AGTCTTGGCTGCATAACGAAGAAA   | 16  | 0  | RDR2-resistant |
| AGTCTTGGGTTGTACTIONGAGAGGC | 0   | 21 | RDR2-sensitive |
| AGTCTTGGTCCGAGGCAGCGGCGC   | 0   | 13 | RDR2-sensitive |
| AGTCTTTAGAGAAACTGCATGTAA   | 61  | 2  | RDR2-resistant |
| AGTCTTTGTCAAGTGTCTGTGGT    | 0   | 14 | RDR2-sensitive |
| AGTCTTTTATCATTTAGGTCGGTT   | 14  | 0  | RDR2-resistant |
| AGTCTTTTTCATCTTTAAGTCGGTT  | 11  | 31 | RDR2-sensitive |
| AGTCTTTTTCGGGCTTGAGCCGGAC  | 0   | 15 | RDR2-sensitive |
| AGTGAAACGGCACGGTTGGACGCT   | 0   | 24 | RDR2-sensitive |
| AGTGAACAGGTGATCTGACGGCCA   | 373 | 11 | RDR2-resistant |
| AGTGAACAGTAGACGCGCTCCTC    | 0   | 14 | RDR2-sensitive |
| AGTGAACAGTAGGAATGGGCGCGC   | 0   | 19 | RDR2-sensitive |
| AGTGAACATGTAGGCGCGGCTGAT   | 0   | 14 | RDR2-sensitive |
| AGTGAACCGGACCGAGACGTAGTG   | 1   | 12 | RDR2-sensitive |
| AGTGAACGGAACGGAGCGTACTG    | 1   | 22 | RDR2-sensitive |
| AGTGAACGGCAGACTGGAACGTAC   | 0   | 17 | RDR2-sensitive |
| AGTGAACGGAACAGAGCGGCTCT    | 1   | 30 | RDR2-sensitive |
| AGTGAACGTAACAGAGCGGCTCC    | 0   | 10 | RDR2-sensitive |
| AGTGAATATGATATTGATTGTGGC   | 24  | 3  | RDR2-resistant |
| AGTGAATGTCGCCGCGTGCCCCAG   | 0   | 13 | RDR2-sensitive |
| AGTGACACACTAGATCTGGAGGAA   | 0   | 10 | RDR2-sensitive |
| AGTGACACACTAGATCTGGAGGGA   | 0   | 10 | RDR2-sensitive |
| AGTGACACATGAACTAGCGGACGG   | 0   | 9  | RDR2-sensitive |
| AGTGACACGCTAGATCTAGGAGGA   | 0   | 11 | RDR2-sensitive |
| AGTGACACGCTAGATCTAGGGAGA   | 0   | 10 | RDR2-sensitive |
| AGTGACACGCTAGATCTAGGGGGA   | 6   | 22 | RDR2-sensitive |
| AGTGACACGCTAGATCTGAGGGAG   | 0   | 9  | RDR2-sensitive |
| AGTGACACGCTAGATCTGAGGGGA   | 4   | 21 | RDR2-sensitive |
| AGTGACACGCTAGATCTGGAGGAA   | 0   | 15 | RDR2-sensitive |
| AGTGACACGCTAGATCTGGAGGGA   | 0   | 21 | RDR2-sensitive |
| AGTGACACGCTAGATCTGGGAAGA   | 0   | 18 | RDR2-sensitive |
| AGTGACACGCTAGATCTGGGGAGA   | 2   | 15 | RDR2-sensitive |
| AGTGACACGCTAGATCTGGGGGAG   | 3   | 25 | RDR2-sensitive |
| AGTGACACGCTAGATCTGGGGGGA   | 9   | 83 | RDR2-sensitive |
| AGTGACACGCTAGATCTGTGGGAG   | 4   | 18 | RDR2-sensitive |
| AGTGACACGCTAGATCTGTGGGGA   | 0   | 21 | RDR2-sensitive |
| AGTGACAGACGATCTCCAGGGACG   | 0   | 11 | RDR2-sensitive |
| AGTGACAGTGACAGGGGCGACGAC   | 20  | 0  | RDR2-resistant |
| AGTGACCAGCACGACAGACGAACT   | 3   | 20 | RDR2-sensitive |
| AGTGACGACGTACATCTTTATGT    | 29  | 0  | RDR2-resistant |
| AGTGACGACTTTGGACGACGTGTT   | 1   | 23 | RDR2-sensitive |

|                           |    |    |                |
|---------------------------|----|----|----------------|
| AGTGACGCGCATGAATGGATTAAC  | 18 | 1  | RDR2-resistant |
| AGTGACGGACACTGTTTGGTTACC  | 0  | 13 | RDR2-sensitive |
| AGTGACGGATTACTACTATTGCGA  | 7  | 49 | RDR2-sensitive |
| AGTGACGGATTCTACTATTACAA   | 0  | 20 | RDR2-sensitive |
| AGTGACGGATTCTACTATTGCAA   | 2  | 18 | RDR2-sensitive |
| AGTGACGGTCTAGAGCTATTTGC   | 1  | 15 | RDR2-sensitive |
| AGTGACGGTCTGACTACAGTGGAT  | 0  | 17 | RDR2-sensitive |
| AGTGACGGTGACGGATCCTTTGCC  | 1  | 14 | RDR2-sensitive |
| AGTGACGGTTTGAACAGGGCGCAC  | 0  | 10 | RDR2-sensitive |
| AGTGACGTAGGAGGTCTGACGGTT  | 0  | 12 | RDR2-sensitive |
| AGTGACGTGGACACTGCAGATGGT  | 0  | 11 | RDR2-sensitive |
| AGTGACTCAACCTTTTCGTTGGCA  | 37 | 4  | RDR2-resistant |
| AGTGACTCTCGACACCGACGTGCT  | 0  | 9  | RDR2-sensitive |
| AGTGACTCTGCAAGGTGGGACCGA  | 0  | 17 | RDR2-sensitive |
| AGTGACTGAATATATGCAGAAAGA  | 14 | 0  | RDR2-resistant |
| AGTGACTGACAAGACGGCGATCAC  | 0  | 10 | RDR2-sensitive |
| AGTGACTGTGGAATAGTCCGGAT   | 0  | 10 | RDR2-sensitive |
| AGTGACTGTTCACTGTCCGGTGTG  | 0  | 15 | RDR2-sensitive |
| AGTGACTTTTGTCTGGGCACTCGGC | 2  | 18 | RDR2-sensitive |
| AGTGAGACGAGGCATGGACGACAC  | 0  | 17 | RDR2-sensitive |
| AGTGAGACGGCTGTTGCTACTTGG  | 0  | 13 | RDR2-sensitive |
| AGTGAGACGTCTGTTGCTACTTGG  | 3  | 25 | RDR2-sensitive |
| AGTGAGAGAGTGTTGAACAGGCAT  | 0  | 11 | RDR2-sensitive |
| AGTGAGATGAGACCAGGACGACAT  | 0  | 22 | RDR2-sensitive |
| AGTGAGCCTCTGAGTTCTGGCGTT  | 0  | 11 | RDR2-sensitive |
| AGTGAGCCTGGCTCAGACTGGACT  | 0  | 9  | RDR2-sensitive |
| AGTGAGCGGGGCTGAGGTATGGTA  | 0  | 18 | RDR2-sensitive |
| AGTGAGGACGGAATGGGAATGGCA  | 0  | 11 | RDR2-sensitive |
| AGTGAGGAGTGAGAAGATGATGGA  | 0  | 13 | RDR2-sensitive |
| AGTGAGGCGTCTGTTACTACTTGG  | 1  | 19 | RDR2-sensitive |
| AGTGAGGGCTCTGGCGACGACGAA  | 0  | 9  | RDR2-sensitive |
| AGTGAGTAGAGGACGTTCTGATCC  | 0  | 21 | RDR2-sensitive |
| AGTGAGTTGCAGTAGCCGGAACAG  | 0  | 9  | RDR2-sensitive |
| AGTGAGTTGCAGTAGCCGGGACAG  | 1  | 59 | RDR2-sensitive |
| AGTGAGTTGCAGTAGGCGAGACAT  | 0  | 25 | RDR2-sensitive |
| AGTGAGTTGCAGTAGTCGGGACAG  | 0  | 12 | RDR2-sensitive |
| AGTGAGTTTGTATGAGTGAGGTTT  | 14 | 0  | RDR2-resistant |
| AGTGATAGTGCAGTGTCTGGACGAC | 0  | 12 | RDR2-sensitive |
| AGTGATACCAAGTCGTCGACGTA   | 37 | 2  | RDR2-resistant |
| AGTGATCGGCTTGCACGGATCGTA  | 0  | 12 | RDR2-sensitive |
| AGTGATCTGACGACCTACACGGAT  | 0  | 9  | RDR2-sensitive |
| AGTGATGGTATGAACGGTCCGCGT  | 0  | 13 | RDR2-sensitive |
| AGTGATGTGGTTGTGTGGAGGAGG  | 17 | 1  | RDR2-resistant |
| AGTGATTATAGCTCTGAGATGGTA  | 0  | 13 | RDR2-sensitive |
| AGTGATTCCGGACTTGGGAGAGGA  | 0  | 13 | RDR2-sensitive |
| AGTGATTCTAGATGTAGCGGCT    | 0  | 14 | RDR2-sensitive |
| AGTGATTGACGTTCCGATCGGCCG  | 0  | 11 | RDR2-sensitive |
| AGTGATTGATGTCCGGATCGGCCG  | 0  | 11 | RDR2-sensitive |
| AGTGATTGCATAGGATATTTTCCC  | 0  | 11 | RDR2-sensitive |

|                            |    |     |                |
|----------------------------|----|-----|----------------|
| AGTGATTGGCACGCGAGATCGACAC  | 0  | 9   | RDR2-sensitive |
| AGTGCACAGGCTGCAGCAGGCTAC   | 4  | 38  | RDR2-sensitive |
| AGTGCACAGGCTGTAGCAGGCTAC   | 0  | 14  | RDR2-sensitive |
| AGTGCACAGGCTGTAGCAGGCTAT   | 6  | 104 | RDR2-sensitive |
| AGTGCACGGAGACGACGAACAAAG   | 0  | 13  | RDR2-sensitive |
| AGTGCACGGTCAACTGAACGCGGT   | 0  | 11  | RDR2-sensitive |
| AGTGCACACTGTTAGATATGTTGCGG | 0  | 14  | RDR2-sensitive |
| AGTGCAGGACAACATATTCGCATC   | 20 | 0   | RDR2-resistant |
| AGTGCAGTCTACGGTGCAGAACAT   | 0  | 9   | RDR2-sensitive |
| AGTGCATGCGTGTAGAGGACTGCA   | 0  | 22  | RDR2-sensitive |
| AGTGCATGGTCGCTGGAACGACGA   | 0  | 9   | RDR2-sensitive |
| AGTGCATTTTGTCTGGGCACTCGGC  | 1  | 22  | RDR2-sensitive |
| AGTGCCCTAAGTACATGTCGTCGT   | 0  | 14  | RDR2-sensitive |
| AGTGCCCTCTGACGGGAAGTCGGT   | 0  | 25  | RDR2-sensitive |
| AGTGCCGAGGACGGGGAACGGCGA   | 0  | 9   | RDR2-sensitive |
| AGTGCCGGGCTGGGCATGACACGA   | 1  | 52  | RDR2-sensitive |
| AGTGCCCTACGAGAGCTCTCGGCAT  | 0  | 19  | RDR2-sensitive |
| AGTGCCCTGAGCCCTGTAGAAGCAC  | 0  | 10  | RDR2-sensitive |
| AGTGCCCTGAGCCCTGTAGAAGCGC  | 0  | 9   | RDR2-sensitive |
| AGTGCCTTTTGTCTGGGCACTCGGC  | 4  | 34  | RDR2-sensitive |
| AGTGCGAGGAATGGCAGAACACGG   | 0  | 12  | RDR2-sensitive |
| AGTGCGCATGTAGGACTGGGCATT   | 0  | 13  | RDR2-sensitive |
| AGTGCGCGGACGGCTTCCAGCGGA   | 0  | 9   | RDR2-sensitive |
| AGTGCGGCACTCGACAAAGACGTC   | 0  | 10  | RDR2-sensitive |
| AGTGCGGCGGGACAATGAAGGCAT   | 0  | 25  | RDR2-sensitive |
| AGTGCGGCTACGGATGAAGCGGTT   | 0  | 16  | RDR2-sensitive |
| AGTGCGTGGGGCTTGCTGTGCGGC   | 0  | 10  | RDR2-sensitive |
| AGTGCTACTCTGAGCTGCAGCGGG   | 0  | 25  | RDR2-sensitive |
| AGTGCTAGCTGTAGAGCACTCGGC   | 1  | 36  | RDR2-sensitive |
| AGTGCTATAGAACAGAAGGGCACA   | 0  | 9   | RDR2-sensitive |
| AGTGCTATAGAACAGGAGGGCATA   | 0  | 9   | RDR2-sensitive |
| AGTGCTATGGTCACTGTACTCGGT   | 1  | 20  | RDR2-sensitive |
| AGTGCTCGCGGTCGGACATCCCGG   | 14 | 0   | RDR2-resistant |
| AGTGCTCTCTGGTCAGGCGCGGAC   | 0  | 20  | RDR2-sensitive |
| AGTGCTCTCTGTAGCAGCACGGAC   | 0  | 10  | RDR2-sensitive |
| AGTGCTGACTTGCGAGATCGTCTT   | 0  | 13  | RDR2-sensitive |
| AGTGCTGGTGAATGGTTCGGCTT    | 0  | 10  | RDR2-sensitive |
| AGTGCTGTGTGAACGAGCCGTTTT   | 0  | 34  | RDR2-sensitive |
| AGTGCTTCGGGCACTCGGCAAAGC   | 0  | 14  | RDR2-sensitive |
| AGTGCTTCGGAGGACGAAGGGCAT   | 0  | 17  | RDR2-sensitive |
| AGTGCTTCTGTTAGATGTTGGATA   | 0  | 14  | RDR2-sensitive |
| AGTGCTTGAGCCCTGTAGAAGCGC   | 0  | 10  | RDR2-sensitive |
| AGTGCTTGAGCCCTGTAGAAGCGT   | 7  | 122 | RDR2-sensitive |
| AGTGCTTTCTGTCTGGGCACTCGGC  | 0  | 19  | RDR2-sensitive |
| AGTGCTTTTTATCGGCACTCGGC    | 4  | 56  | RDR2-sensitive |
| AGTGCTTTTTGTCTGGGCACTCGGC  | 0  | 12  | RDR2-sensitive |
| AGTGCTTTTTGTCTGGGCACTCGGC  | 15 | 218 | RDR2-sensitive |
| AGTGCTTTTTTTCTGGGCACTCGGC  | 6  | 43  | RDR2-sensitive |
| AGTGAAAATAGGCTGACGAGCAA    | 0  | 12  | RDR2-sensitive |

|                           |    |    |                |
|---------------------------|----|----|----------------|
| AGTGGAACCGGTAGCACGTACAAT  | 0  | 35 | RDR2-sensitive |
| AGTGGAACGGAGGGAAAACGACAC  | 2  | 14 | RDR2-sensitive |
| AGTGGAACTCCTAGCGGTGGGCAT  | 0  | 36 | RDR2-sensitive |
| AGTGGAAGCAACACGGTCGTTGGT  | 0  | 13 | RDR2-sensitive |
| AGTGGAAGGAGCTGCTGATGTCGT  | 0  | 16 | RDR2-sensitive |
| AGTGGAAGGGCAAACCTGAGCCAA  | 0  | 13 | RDR2-sensitive |
| AGTGGAAGGGGAGGAGACGGACGC  | 0  | 32 | RDR2-sensitive |
| AGTGGAAGGTGAGGCTGATCTGAA  | 50 | 1  | RDR2-resistant |
| AGTGGAATAGGCGAGCGACGACGT  | 0  | 13 | RDR2-sensitive |
| AGTGGAATTTTGCAGTGGGCCCGC  | 1  | 12 | RDR2-sensitive |
| AGTGGACAAGATTTACAGGTTCCG  | 0  | 11 | RDR2-sensitive |
| AGTGGACACCAGGGGCGAGTTCAC  | 0  | 15 | RDR2-sensitive |
| AGTGGACAGGAACAACAAGGTCGT  | 0  | 10 | RDR2-sensitive |
| AGTGGACAGTCAGGCAACGCTCTC  | 0  | 10 | RDR2-sensitive |
| AGTGGACAGTTGACGCCGGCCCGT  | 3  | 47 | RDR2-sensitive |
| AGTGGACAGTTGACGCCGGCTCGT  | 0  | 10 | RDR2-sensitive |
| AGTGGACCGTAAGCTCGAGAAGAC  | 0  | 14 | RDR2-sensitive |
| AGTGGACCTGAAGTAGAGAGACAC  | 0  | 35 | RDR2-sensitive |
| AGTGGACGAGGACGTGCGCAATGC  | 0  | 75 | RDR2-sensitive |
| AGTGGACGCGTAGAACGGCGTCGA  | 0  | 30 | RDR2-sensitive |
| AGTGGACGGTCTGCTGCTCATGCG  | 0  | 31 | RDR2-sensitive |
| AGTGGACGTGCTGCTACTCCCCTC  | 0  | 9  | RDR2-sensitive |
| AGTGGACTCCTCAACGGGGACTAG  | 0  | 17 | RDR2-sensitive |
| AGTGGACTGTCAGCGGCCTAGTGC  | 0  | 10 | RDR2-sensitive |
| AGTGGACTGTGTGCATGGAGACGA  | 0  | 61 | RDR2-sensitive |
| AGTGGACTGTTCACTGTCCGGTGC  | 2  | 14 | RDR2-sensitive |
| AGTGGAGACGAGAGCTGACGTGGC  | 0  | 17 | RDR2-sensitive |
| AGTGGAGCGGACCAGCATCGGCCGT | 0  | 12 | RDR2-sensitive |
| AGTGGAGGCGAGAAGCTGACGTGGC | 0  | 10 | RDR2-sensitive |
| AGTGGAGGCGAGAGCTGACGTGGC  | 0  | 48 | RDR2-sensitive |
| AGTGGAGGGCCTAGGATAGCAGAT  | 17 | 0  | RDR2-resistant |
| AGTGGATAGGCTCTATGTATCTAG  | 0  | 9  | RDR2-sensitive |
| AGTGGATCTGGACGCACAAGCGGC  | 1  | 12 | RDR2-sensitive |
| AGTGGATGGCTGCAGCGATTGACT  | 0  | 10 | RDR2-sensitive |
| AGTGGATGGTTAACGTTGGCTCGT  | 0  | 25 | RDR2-sensitive |
| AGTGGATGTAGCATATTTAAAGAT  | 0  | 9  | RDR2-sensitive |
| AGTGGATGTGAGAGGTGGAGGGAC  | 0  | 9  | RDR2-sensitive |
| AGTGGATTGTTACCTCAAAGATGG  | 0  | 48 | RDR2-sensitive |
| AGTGGCACGGACAGTCTACGGCTC  | 0  | 26 | RDR2-sensitive |
| AGTGGCACTAGACTCTTACGGCGT  | 0  | 40 | RDR2-sensitive |
| AGTGGCAGAACCGCGCAACAACGT  | 0  | 16 | RDR2-sensitive |
| AGTGGCATTGAACGGATCAATATA  | 17 | 0  | RDR2-resistant |
| AGTGGCCTGGTAGTCATGTCCGAC  | 0  | 9  | RDR2-sensitive |
| AGTGGCTGGTTTGGAGTTGTACGG  | 0  | 15 | RDR2-sensitive |
| AGTGGCTTGA CT CGTTTGGACGG | 0  | 21 | RDR2-sensitive |
| AGTGGGAGAGGCTCTGCACGGACG  | 0  | 13 | RDR2-sensitive |
| AGTGGGAGTAGAACTGCCAAGGGG  | 0  | 10 | RDR2-sensitive |
| AGTGGGAGTGGAGCTTTTGC GGCC | 0  | 9  | RDR2-sensitive |
| AGTGGGCGCTGTAGGGGCACCGCT  | 0  | 20 | RDR2-sensitive |

|                          |    |    |                |
|--------------------------|----|----|----------------|
| AGTGGGCTAACGACGACGGATCAG | 36 | 2  | RDR2-resistant |
| AGTGGTAGCGACCCTGGACTCGGA | 0  | 15 | RDR2-sensitive |
| AGTGGTCACTAGTAGGGATGGCAA | 0  | 31 | RDR2-sensitive |
| AGTGGTCCATGTCCAGATCGTCCG | 0  | 10 | RDR2-sensitive |
| AGTGGTCCAAGCTGTAGGTCGGGC | 0  | 10 | RDR2-sensitive |
| AGTGGTCCAAGGAATAGGTCAGGC | 0  | 11 | RDR2-sensitive |
| AGTGGTGGACAAGACAGCGATCAC | 0  | 13 | RDR2-sensitive |
| AGTGGTGTGCTGTAGTGCGGGCCA | 0  | 13 | RDR2-sensitive |
| AGTGGTTATGGATGGTTTGGCGTA | 18 | 0  | RDR2-resistant |
| AGTGGTTCGGGTCGCTGGAGCATA | 0  | 17 | RDR2-sensitive |
| AGTGGTTGCACGACTGAGAACGGA | 0  | 13 | RDR2-sensitive |
| AGTGGTTGGACCGTCTGACGGCAT | 0  | 10 | RDR2-sensitive |
| AGTGGTTGGAGTGTAGTCAGCATC | 17 | 0  | RDR2-resistant |
| AGTGTAAGTGATTGTATTGCATA  | 0  | 10 | RDR2-sensitive |
| AGTGTAAGACGGAGACTGAGTCAG | 0  | 58 | RDR2-sensitive |
| AGTGTAATGATCTGTGGAATACAA | 0  | 20 | RDR2-sensitive |
| AGTGACGACGGAGACTGAGCCAG  | 0  | 49 | RDR2-sensitive |
| AGTGACGACGGAGGCTGAGTCAG  | 0  | 10 | RDR2-sensitive |
| AGTGACGACGGAGGCTGAGTCAG  | 0  | 18 | RDR2-sensitive |
| AGTGACGACGGAGGCTGAGTCAG  | 0  | 9  | RDR2-sensitive |
| AGTGACGACGGAGGCTGAGTCAG  | 0  | 18 | RDR2-sensitive |
| AGTGACGACGGAGGCTGAGTCAG  | 0  | 26 | RDR2-sensitive |
| AGTGACGACGGAGGCTGAGTCAG  | 0  | 10 | RDR2-sensitive |
| AGTGACGACGGAGGCTGAGTCAG  | 0  | 65 | RDR2-sensitive |
| AGTGACGACGGAGGCTGAGTCAG  | 0  | 51 | RDR2-sensitive |
| AGTGACGACGGAGGCTGAGTCAG  | 0  | 50 | RDR2-sensitive |
| AGTGACGACGGAGGCTGAGTCAG  | 0  | 21 | RDR2-sensitive |
| AGTGACGACGGAGGCTGAGTCAG  | 0  | 34 | RDR2-sensitive |
| AGTGACGACGGAGGCTGAGTCAG  | 1  | 41 | RDR2-sensitive |
| AGTGACGACGGAGGCTGAGTCAG  | 15 | 0  | RDR2-resistant |
| AGTGACGACGGAGGCTGAGTCAG  | 5  | 53 | RDR2-sensitive |
| AGTGACGACGGAGGCTGAGTCAG  | 0  | 23 | RDR2-sensitive |
| AGTGACGACGGAGGCTGAGTCAG  | 54 | 6  | RDR2-resistant |
| AGTGACGACGGAGGCTGAGTCAG  | 0  | 52 | RDR2-sensitive |
| AGTGACGACGGAGGCTGAGTCAG  | 0  | 10 | RDR2-sensitive |
| AGTGACGACGGAGGCTGAGTCAG  | 0  | 9  | RDR2-sensitive |
| AGTGACGACGGAGGCTGAGTCAG  | 0  | 29 | RDR2-sensitive |
| AGTGACGACGGAGGCTGAGTCAG  | 0  | 66 | RDR2-sensitive |
| AGTGACGACGGAGGCTGAGTCAG  | 0  | 9  | RDR2-sensitive |
| AGTGACGACGGAGGCTGAGTCAG  | 0  | 20 | RDR2-sensitive |
| AGTGACGACGGAGGCTGAGTCAG  | 0  | 11 | RDR2-sensitive |
| AGTGACGACGGAGGCTGAGTCAG  | 0  | 14 | RDR2-sensitive |
| AGTGACGACGGAGGCTGAGTCAG  | 1  | 20 | RDR2-sensitive |
| AGTGACGACGGAGGCTGAGTCAG  | 0  | 11 | RDR2-sensitive |
| AGTGACGACGGAGGCTGAGTCAG  | 0  | 14 | RDR2-sensitive |
| AGTGACGACGGAGGCTGAGTCAG  | 0  | 12 | RDR2-sensitive |
| AGTGACGACGGAGGCTGAGTCAG  | 0  | 9  | RDR2-sensitive |
| AGTGACGACGGAGGCTGAGTCAG  | 0  | 16 | RDR2-sensitive |
| AGTGACGACGGAGGCTGAGTCAG  | 1  | 18 | RDR2-sensitive |

|                          |    |     |                |
|--------------------------|----|-----|----------------|
| AGTGTCTTTTGTCTGGACTCGGC  | 0  | 27  | RDR2-sensitive |
| AGTGTCTTTTGTCTGGCACTCGGC | 18 | 159 | RDR2-sensitive |
| AGTGTGACTAAGCTGAGTTGTGCG | 14 | 0   | RDR2-resistant |
| AGTGTGCTGTAAAGGACGGAGAAT | 0  | 12  | RDR2-sensitive |
| AGTGTGGAACCCGAATGATGGCAC | 0  | 14  | RDR2-sensitive |
| AGTGTGGACTCCAAGAAGACGATA | 0  | 17  | RDR2-sensitive |
| AGTGTGGCACTCGACAAAGACGTC | 0  | 21  | RDR2-sensitive |
| AGTGTGGCTCTGATACCATGTAGA | 36 | 4   | RDR2-resistant |
| AGTGTGGTATCTGATTACGGTTGG | 0  | 18  | RDR2-sensitive |
| AGTGTGTAGGCTTACGATACGGTA | 0  | 9   | RDR2-sensitive |
| AGTGTGTCGGTTTAGGCGTTGGCC | 0  | 9   | RDR2-sensitive |
| AGTGTGTGACTGATGGTGGATCGC | 0  | 24  | RDR2-sensitive |
| AGTGTGTGACTGATGGTGGGTCGC | 0  | 10  | RDR2-sensitive |
| AGTGTGTTTGGTTGTAGGTTGCAT | 3  | 144 | RDR2-sensitive |
| AGTGTGTTTTGTCTGGCACTCGGC | 0  | 13  | RDR2-sensitive |
| AGTGTTATCTGTTAGACTGTCCGT | 0  | 9   | RDR2-sensitive |
| AGTGTTATGTCGCTGGCACTCGGC | 1  | 23  | RDR2-sensitive |
| AGTGTTCTGCTGCATCTCTCGGGC | 0  | 10  | RDR2-sensitive |
| AGTGTTGAATCTAGGCCTGGGCAT | 0  | 22  | RDR2-sensitive |
| AGTGTTGAGTTGCTGGGACGTCGT | 0  | 12  | RDR2-sensitive |
| AGTGTTGATTGTAGTATTGTCCGG | 0  | 17  | RDR2-sensitive |
| AGTGTTGCTGGAAACGGAGACGGA | 1  | 21  | RDR2-sensitive |
| AGTGTTGGAAGTATTAGGGTTT   | 0  | 48  | RDR2-sensitive |
| AGTGTTGGACATGGTCTGTAGGCA | 0  | 9   | RDR2-sensitive |
| AGTGTTGGACGCCGAAAAAGGCA  | 0  | 9   | RDR2-sensitive |
| AGTGTTGGAGCCTGTACACGCGGC | 1  | 14  | RDR2-sensitive |
| AGTGTTGGCTGTAGAGATGGCCAA | 0  | 13  | RDR2-sensitive |
| AGTGTTGGGTCTTACTGACGGAT  | 0  | 9   | RDR2-sensitive |
| AGTGTTGTGTGTGGGGATGGTCTA | 1  | 35  | RDR2-sensitive |
| AGTGTTGTTGATCGGACATCCGC  | 0  | 10  | RDR2-sensitive |
| AGTGTTGTTGGACGGAAAAAGGTG | 0  | 12  | RDR2-sensitive |
| AGTGTTTAGGGTGTGAACAGTGA  | 8  | 73  | RDR2-sensitive |
| AGTGTTTCGATACGGCACGGGCAT | 0  | 9   | RDR2-sensitive |
| AGTGTTTGGTTGAGAGTCAAGCGG | 1  | 12  | RDR2-sensitive |
| AGTGTTTGTATTCTGATAATTGGT | 4  | 18  | RDR2-sensitive |
| AGTGTTTTATTTCTGGCACTCGGC | 6  | 50  | RDR2-sensitive |
| AGTGTTTTTGTCTGGCACTCGGC  | 13 | 57  | RDR2-sensitive |
| AGTTAAAAGCTCGTAGTTGGACC  | 65 | 5   | RDR2-resistant |
| AGTTAATGGCTACTCTGTTGGAG  | 0  | 11  | RDR2-sensitive |
| AGTTAATTGTTTTGGTTGTCTGGC | 0  | 14  | RDR2-sensitive |
| AGTTACGCGGCTGGCGGCTGGAAG | 0  | 12  | RDR2-sensitive |
| AGTTACTGCGGTATTCAACATAAT | 28 | 0   | RDR2-resistant |
| AGTTACTGTTGATCCTTGC GGCC | 0  | 14  | RDR2-sensitive |
| AGTTACTTCCGACGGCTTAAGACG | 0  | 11  | RDR2-sensitive |
| AGTTAGATGAGTCGGGGACGACAC | 0  | 9   | RDR2-sensitive |
| AGTTAGCCGTTGGACTCATGGCAC | 1  | 26  | RDR2-sensitive |
| AGTTAGCGGCTCGTTTGACCACAC | 0  | 14  | RDR2-sensitive |
| AGTTAGTTGCAGTAGCCGGGACAG | 0  | 13  | RDR2-sensitive |
| AGTTATAAGCTGTCAACGTACGG  | 0  | 10  | RDR2-sensitive |

|                            |     |     |                |
|----------------------------|-----|-----|----------------|
| AGTTATATGAGTCGGACTAGCATG   | 0   | 11  | RDR2-sensitive |
| AGTTATATTTGGAGACTGTGTCG    | 0   | 9   | RDR2-sensitive |
| AGTTATCACGTAGGGACTGGCGTC   | 0   | 10  | RDR2-sensitive |
| AGTTATCGTTTAGGACAACGGCAC   | 0   | 11  | RDR2-sensitive |
| AGTTATCTAGGATTTATCGTTGTG   | 26  | 0   | RDR2-resistant |
| AGTTATGATCTGCTGACTGGTCGA   | 0   | 9   | RDR2-sensitive |
| AGTTATGGACTGACGGTTGGTCGC   | 0   | 30  | RDR2-sensitive |
| AGTTATTTCTGTAGCCTGTGCCGC   | 0   | 17  | RDR2-sensitive |
| AGTTCAACTCTGGACGCTGGATGA   | 85  | 7   | RDR2-resistant |
| AGTTCAAGACGGTATGCTGTGGGT   | 25  | 2   | RDR2-resistant |
| AGTTCAGACTGCGGGGGGTGTTAG   | 0   | 13  | RDR2-sensitive |
| AGTTCAGTTTGGCTCAGAGCGTT    | 0   | 17  | RDR2-sensitive |
| AGTTCATACGGATACTCATTAAATA  | 15  | 0   | RDR2-resistant |
| AGTTCATAGACGGTAACAGAGCTC   | 0   | 10  | RDR2-sensitive |
| AGTTCATGTCGCTGTAGTGGCGTT   | 0   | 11  | RDR2-sensitive |
| AGTTCCACTTAACTGTCGTGCTGG   | 17  | 0   | RDR2-resistant |
| AGTTCCAGAGCTCTTCAAGTAGAT   | 55  | 1   | RDR2-resistant |
| AGTTCCGACGGCTTATTACATTAAG  | 0   | 14  | RDR2-sensitive |
| AGTTCCGCGGCAGAAGTCAGAGCAG  | 0   | 9   | RDR2-sensitive |
| AGTTCCGGCTAGGCCAGAGACCTGC  | 0   | 13  | RDR2-sensitive |
| AGTTCCGGCTAGGCCGAGACCTGC   | 0   | 20  | RDR2-sensitive |
| AGTTCCGGCTCGGCTCAGATCGGCT  | 3   | 16  | RDR2-sensitive |
| AGTTCCGTCCTGACAGCAGAACGC   | 0   | 11  | RDR2-sensitive |
| AGTTCCGTCGATCGGATCTTCGGTT  | 0   | 28  | RDR2-sensitive |
| AGTTCCGTCGTACTGATAGTTGGG   | 0   | 11  | RDR2-sensitive |
| AGTTCCGTCGTATATATAAGCATT   | 0   | 10  | RDR2-sensitive |
| AGTTCCGTCGTGCGGCTGACCGTTCT | 21  | 2   | RDR2-resistant |
| AGTTCCGTTGGGCTGTAGGCCGGCT  | 0   | 10  | RDR2-sensitive |
| AGTTCTCGGGCTGGTATGTTGACG   | 0   | 11  | RDR2-sensitive |
| AGTTCTCTCGGGCGAGTGAGCGGC   | 0   | 9   | RDR2-sensitive |
| AGTTCTGGCTGATATGACACGGTT   | 0   | 68  | RDR2-sensitive |
| AGTTCTGTAGGGTTTGGTCGGCAC   | 0   | 21  | RDR2-sensitive |
| AGTTCTGTATTAAGCGTAGACGA    | 21  | 0   | RDR2-resistant |
| AGTTGAACCCTGCTGCCGTAGACGT  | 0   | 11  | RDR2-sensitive |
| AGTTGAACGGACCGAGCAGGCCAG   | 0   | 17  | RDR2-sensitive |
| AGTTGAATTCTGCATCCGGAAGGC   | 0   | 9   | RDR2-sensitive |
| AGTTGACCGCTGCAGTTGAAGAGT   | 0   | 23  | RDR2-sensitive |
| AGTTGACGCCTACGTGGATCTGAT   | 0   | 9   | RDR2-sensitive |
| AGTTGACGGGTTTGTATGACATGAC  | 177 | 23  | RDR2-resistant |
| AGTTGACGGTTTTGTATGACATGAC  | 88  | 0   | RDR2-resistant |
| AGTTGACTCGGAGACGATGGCCTA   | 0   | 10  | RDR2-sensitive |
| AGTTGACTGGAAGACGACGGTCTA   | 0   | 11  | RDR2-sensitive |
| AGTTGACTGGGAGACGACAGCCTA   | 0   | 9   | RDR2-sensitive |
| AGTTGACTGGGAGACGACGGCCTA   | 4   | 109 | RDR2-sensitive |
| AGTTGACTGGGAGACGATGGCCTA   | 0   | 9   | RDR2-sensitive |
| AGTTGACTGGTAGACGACGGCGTA   | 0   | 9   | RDR2-sensitive |
| AGTTGACTGTTTAGATTGATGCAT   | 0   | 9   | RDR2-sensitive |
| AGTTGAGAGTAGTGGAAGGCCGGGC  | 130 | 11  | RDR2-resistant |
| AGTTGATGTGGTCTAGCTCGGCCG   | 0   | 9   | RDR2-sensitive |



|                           |     |    |                |
|---------------------------|-----|----|----------------|
| AGTTGATTCTACAGTCGGCCCGTC  | 1   | 17 | RDR2-sensitive |
| AGTTGCAACTGTAGCTGCAGAGTC  | 0   | 10 | RDR2-sensitive |
| AGTTGCAGCTGGAGAAGCAGGCCA  | 0   | 9  | RDR2-sensitive |
| AGTTGCCGTAGCAACGCACGGACA  | 0   | 11 | RDR2-sensitive |
| AGTTGCCTGAACAACGACGGCCTT  | 0   | 11 | RDR2-sensitive |
| AGTTGCCTGTAGTAGTTCAGCCGG  | 0   | 14 | RDR2-sensitive |
| AGTTGCGGACGGTATGAGAGGCAC  | 0   | 20 | RDR2-sensitive |
| AGTTGCTACATGTAGAAATGCATC  | 0   | 10 | RDR2-sensitive |
| AGTTGCTCGGACAGCGTCAGCAAC  | 0   | 44 | RDR2-sensitive |
| AGTTGCTGCGTTGACCGTCGGGAC  | 31  | 0  | RDR2-resistant |
| AGTTGCTTAGACTGTACAACGGCT  | 0   | 25 | RDR2-sensitive |
| AGTTGCTTATTGTCAAGGACTATC  | 24  | 2  | RDR2-resistant |
| AGTTGGAATGAACAGTTTGACGTT  | 45  | 6  | RDR2-resistant |
| AGTTGGACCTATCTCGTGACGGAC  | 0   | 13 | RDR2-sensitive |
| AGTTGGATAACTGATGTCTTTCGA  | 26  | 1  | RDR2-resistant |
| AGTTGGATCCAGACGACATGACAA  | 22  | 0  | RDR2-resistant |
| AGTTGGCGAGCTCGAGAAGACCAG  | 0   | 14 | RDR2-sensitive |
| AGTTGGCGGACTCACCACGGCCTG  | 0   | 14 | RDR2-sensitive |
| AGTTGGCGGCAATAGTACTGACGT  | 0   | 9  | RDR2-sensitive |
| AGTTGGCTGCGAGCATACAGTTCA  | 2   | 31 | RDR2-sensitive |
| AGTTGGGAATGGGAATGGCAGAAC  | 0   | 11 | RDR2-sensitive |
| AGTTGGGATAGATGGCAGAACCGT  | 0   | 12 | RDR2-sensitive |
| AGTTGGGTTTGTGCGGGTCGGGCGG | 0   | 12 | RDR2-sensitive |
| AGTTGTAGATCTTTATTGCAGAGA  | 0   | 10 | RDR2-sensitive |
| AGTTGTAGCAGGCAGAGGACTTTC  | 0   | 13 | RDR2-sensitive |
| AGTTGTATTGAAGGGCAAGCCACC  | 28  | 1  | RDR2-resistant |
| AGTTGTATTGATTTCGATTGTTGAT | 0   | 14 | RDR2-sensitive |
| AGTTGTCACTGTTGACGATCGCTC  | 17  | 1  | RDR2-resistant |
| AGTTGTGCGACTGAGAAGTAGGCTC | 0   | 14 | RDR2-sensitive |
| AGTTGTGCTGCATACTACAAAAT   | 0   | 9  | RDR2-sensitive |
| AGTTGTGCTGGATAGTGCAAAAAT  | 0   | 24 | RDR2-sensitive |
| AGTTGTCTATAGCGTCGGGTTACC  | 37  | 1  | RDR2-resistant |
| AGTTGTGGGACCGAATCGGTGGAT  | 0   | 16 | RDR2-sensitive |
| AGTTGTGGTATTGTAAACTGCGGT  | 0   | 24 | RDR2-sensitive |
| AGTTGTTGCGGACTGCTGCGGCTGC | 1   | 33 | RDR2-sensitive |
| AGTTGTTGACTGGAACCAACGGCT  | 0   | 16 | RDR2-sensitive |
| AGTTGTTTCCTGTTGGCATTCTA   | 79  | 0  | RDR2-resistant |
| AGTTTAAGATGTAGAATTGATGGT  | 0   | 10 | RDR2-sensitive |
| AGTTTAATATCTGATATGTGGACC  | 45  | 1  | RDR2-resistant |
| AGTTTAGATCGTGCCGACGGTGCT  | 37  | 3  | RDR2-resistant |
| AGTTTAGGCAGACATACTGAAGTT  | 120 | 13 | RDR2-resistant |
| AGTTTAGGGTCGACACAGCGGAAG  | 25  | 0  | RDR2-resistant |
| AGTTTATGACTGTACAGCGGTGAT  | 17  | 0  | RDR2-resistant |
| AGTTTATGGAGATGGATGATGATT  | 33  | 0  | RDR2-resistant |
| AGTTTATTCATGGATCTGGTTCGG  | 28  | 1  | RDR2-resistant |
| AGTTTCAAACCTGATTGTATGAAGA | 19  | 0  | RDR2-resistant |
| AGTTTCAACGGTCGTCATACGTCA  | 0   | 16 | RDR2-sensitive |
| AGTTTCAACGGTCGTCATGCGTCA  | 1   | 34 | RDR2-sensitive |
| AGTTTCAACGGTCGTCGCGTCA    | 1   | 12 | RDR2-sensitive |

|                           |    |    |                |
|---------------------------|----|----|----------------|
| AGTTTCACGGATGTAGGTGCGGGT  | 0  | 12 | RDR2-sensitive |
| AGTTTCCGACGGCCTACACTGTTT  | 1  | 15 | RDR2-sensitive |
| AGTTTCTACTATCGTTGTGCGTCA  | 0  | 15 | RDR2-sensitive |
| AGTTTCTGGCTGAATGTAACGGTA  | 0  | 10 | RDR2-sensitive |
| AGTTTCTGGCTGGCTGTAACGGTA  | 11 | 75 | RDR2-sensitive |
| AGTTTCTGGCTGGCTGTAACGGTT  | 0  | 10 | RDR2-sensitive |
| AGTTTCTTCGGCAACCTTGGCGGC  | 19 | 0  | RDR2-resistant |
| AGTTTGCGACTCGGACAGGCCTAG  | 0  | 21 | RDR2-sensitive |
| AGTTTGCGGAGGCCGAGGATGACA  | 14 | 0  | RDR2-resistant |
| AGTTTGGACTGGTGGGAAGGGCTAT | 0  | 23 | RDR2-sensitive |
| AGTTTGGACTGGTGGGAGGGCTAT  | 2  | 53 | RDR2-sensitive |
| AGTTTGGATAGGAACAGCCATGGC  | 0  | 14 | RDR2-sensitive |
| AGTTTGGCCGGCTATATAACCATC  | 0  | 12 | RDR2-sensitive |
| AGTTTGGCTGGGGCGGCACATCTG  | 27 | 2  | RDR2-resistant |
| AGTTTGGCTGTCGCGTACGTCTCT  | 60 | 0  | RDR2-resistant |
| AGTTTGTAGGACAGCATATTCACA  | 0  | 9  | RDR2-sensitive |
| AGTTTGTCTAGTCGTTGGTGTCTG  | 0  | 16 | RDR2-sensitive |
| AGTTTGTCTCGACCTCGGCTTCGT  | 0  | 12 | RDR2-sensitive |
| AGTTTGTCTCTGAATTCGGCTCA   | 0  | 13 | RDR2-sensitive |
| AGTTTGTGTTGATGGTACGTGCTAC | 73 | 7  | RDR2-resistant |
| AGTTTTACTGTAGTGATCGGCGCC  | 0  | 62 | RDR2-sensitive |
| AGTTTTAGGACGGCCGCTGACGGC  | 0  | 14 | RDR2-sensitive |
| AGTTTTAGGCGGCTCGCGGCTATG  | 19 | 0  | RDR2-resistant |
| AGTTTTAGGTCTGGATCTAGGTTT  | 18 | 0  | RDR2-resistant |
| AGTTTTCACTATCGTCGTGCATCA  | 0  | 10 | RDR2-sensitive |
| AGTTTTCGATCGTTATCTGGTGCA  | 0  | 10 | RDR2-sensitive |
| AGTTTTCGGACGAGGACGCAACGG  | 0  | 11 | RDR2-sensitive |
| AGTTTTCGGGACTGTTTCGGGCAA  | 0  | 11 | RDR2-sensitive |
| AGTTTTCGTGACTGTTTCGGGCAA  | 2  | 18 | RDR2-sensitive |
| AGTTTTCTGTTAGAATTGGATGGA  | 0  | 13 | RDR2-sensitive |
| AGTTTTGCACTGCAAGAAAGTCGG  | 0  | 10 | RDR2-sensitive |
| AGTTTTGGACCCTTAGCTCGGCGC  | 3  | 30 | RDR2-sensitive |
| AGTTTTGGACCCTTGTCTCGGCGC  | 3  | 35 | RDR2-sensitive |
| AGTTTTGGACGTACGGACGGATGC  | 0  | 11 | RDR2-sensitive |
| AGTTTTGGGCGTAAGGACGGATGC  | 0  | 11 | RDR2-sensitive |
| AGTTTTTCTGATTAAATGGACAAC  | 0  | 13 | RDR2-sensitive |
| AGTTTTTGCATCTATCGTTCGGCC  | 0  | 13 | RDR2-sensitive |
| AGTTTTTTTTATTTCTGTAGTCGCA | 24 | 1  | RDR2-resistant |
| ATAAAAATTCGTTCCGGCTACGGTC | 0  | 10 | RDR2-sensitive |
| ATAAAGGGTATTCATCGTCTGAC   | 50 | 1  | RDR2-resistant |
| ATAAATGTAAGGATCGGATCGGG   | 19 | 0  | RDR2-resistant |
| ATAAACACCGTATATTCGTCCGGCC | 0  | 9  | RDR2-sensitive |
| ATAAACACGGACTCTGTCCGGTAC  | 0  | 14 | RDR2-sensitive |
| ATAAACCCGTTAGGTCTGTCCGAT  | 0  | 14 | RDR2-sensitive |
| ATAAACTTTGATTAGCCGGAACGA  | 2  | 15 | RDR2-sensitive |
| ATAAACTTTGATTAGCCGGAATAA  | 7  | 43 | RDR2-sensitive |
| ATAAACTTTGATTAGCTGGAACGA  | 8  | 36 | RDR2-sensitive |
| ATAAAGGAATGTAGCTTACGTGGC  | 32 | 0  | RDR2-resistant |
| ATAAAGTTTGTAGCACGGGTGACA  | 15 | 0  | RDR2-resistant |

|                           |    |    |                |
|---------------------------|----|----|----------------|
| ATAAATGACGGATGTAGAGGACGT  | 0  | 20 | RDR2-sensitive |
| ATAAATTCAGTAGTCGGTCCGGTT  | 0  | 9  | RDR2-sensitive |
| ATAAATTCGAAGGTTACTGGCATT  | 17 | 1  | RDR2-resistant |
| ATAAATTTTTACTCGTCAGATACC  | 22 | 1  | RDR2-resistant |
| ATAACAACCTGTGCTGATTGGATG  | 15 | 0  | RDR2-resistant |
| ATAACACAACCGAGCTCGGCCCA   | 0  | 9  | RDR2-sensitive |
| ATAACAGCGTAGACGGTCTGTCC   | 0  | 12 | RDR2-sensitive |
| ATAACAGCTCAGGACCTTGACGAC  | 0  | 9  | RDR2-sensitive |
| ATAACATCGTACGAGGCTTGGCAT  | 0  | 19 | RDR2-sensitive |
| ATAACATGGAGCGGAAGTAGGTTT  | 31 | 1  | RDR2-resistant |
| ATAACCTGTGGACGCCTACACTAA  | 0  | 16 | RDR2-sensitive |
| ATAACGCGGTATTAAGTTGGAATG  | 28 | 3  | RDR2-resistant |
| ATAACGGATGTAGAGACGACGTTA  | 0  | 11 | RDR2-sensitive |
| ATAACGTCAAATGTAGTTAGCGG   | 47 | 0  | RDR2-resistant |
| ATAACTCCCGTCGGCTGGCGGCGC  | 0  | 10 | RDR2-sensitive |
| ATAACTCTGGCCTAGGCACGTCAT  | 0  | 10 | RDR2-sensitive |
| ATAACTGTACGGACGGTCCGGCCC  | 0  | 12 | RDR2-sensitive |
| ATAACTTGACGGATCGCACGGCCT  | 45 | 3  | RDR2-resistant |
| ATAACTTTCGTGACTGTTCCGGCC  | 0  | 9  | RDR2-sensitive |
| ATAAGACAGGTCACGGAGCGGTAT  | 29 | 2  | RDR2-resistant |
| ATAAGACAGTAGTGTAGACGTCCA  | 0  | 20 | RDR2-sensitive |
| ATAAGACCTTCGGCGACGAAGCAT  | 0  | 9  | RDR2-sensitive |
| ATAAGACTTATATTATCATTTCATT | 32 | 1  | RDR2-resistant |
| ATAAGAGACTACGTTTCGACGGCTG | 0  | 9  | RDR2-sensitive |
| ATAAGAGTAGAATCTTGACGACAT  | 0  | 9  | RDR2-sensitive |
| ATAAGATCCTACGTCTGACGGTTG  | 0  | 15 | RDR2-sensitive |
| ATAAGATTTAAGGATCAAGTCGGA  | 0  | 9  | RDR2-sensitive |
| ATAAGATTTAATGATCGGATCGGA  | 0  | 10 | RDR2-sensitive |
| ATAAGCGGGCGGGCTTGACAGGA   | 0  | 11 | RDR2-sensitive |
| ATAAGCGGGGACGTACTIONGACAG | 0  | 11 | RDR2-sensitive |
| ATAAGGACCAGAGTGTGCATGTTG  | 39 | 2  | RDR2-resistant |
| ATAAGGATTGCATTTTTTCATTATC | 29 | 3  | RDR2-resistant |
| ATAAGGCCTGTGGCATGCACACTA  | 33 | 0  | RDR2-resistant |
| ATAAGGCGTGCTCTCTATGCAT    | 1  | 19 | RDR2-sensitive |
| ATAAGGGCTAGTTTGGATCGGCGC  | 0  | 25 | RDR2-sensitive |
| ATAAGTAATTTGGATGAATCGGAC  | 30 | 0  | RDR2-resistant |
| ATAAGTACTCGTTGGAAAGGTATG  | 0  | 12 | RDR2-sensitive |
| ATAAGTCAATTATTTTCGTCCGCC  | 2  | 14 | RDR2-sensitive |
| ATAAGTCCGACTGCATACAATATA  | 0  | 12 | RDR2-sensitive |
| ATAAGTCTTTGCCGTCGGAGATAA  | 2  | 17 | RDR2-sensitive |
| ATAAGTGCCTGTAGATAGGGTGTA  | 1  | 17 | RDR2-sensitive |
| ATAAGTGTTGGACTAGCACGGCCA  | 0  | 16 | RDR2-sensitive |
| ATAAGTTTAGATCGTGCCGACGGT  | 33 | 3  | RDR2-resistant |
| ATAATACTGATGAATTGGTCGGCC  | 0  | 59 | RDR2-sensitive |
| ATAATATTTTAGCAAGTCGGCAAT  | 15 | 0  | RDR2-resistant |
| ATAATGAGAACTTTATGATGTGGA  | 16 | 0  | RDR2-resistant |
| ATAATGATCGAGCGATGACATTTA  | 41 | 2  | RDR2-resistant |
| ATAATGTTGCATAGGATTGTTGGC  | 0  | 12 | RDR2-sensitive |
| ATAATTCACCGGACTGTCTGGTGT  | 0  | 13 | RDR2-sensitive |

|                           |    |    |                |
|---------------------------|----|----|----------------|
| ATAATTCACTGGACTGTTTGGTGT  | 0  | 10 | RDR2-sensitive |
| ATAATTCATCGGACTGTTCCGGTGT | 1  | 12 | RDR2-sensitive |
| ATAATTTGGACTGGTGGGAGGGCT  | 1  | 25 | RDR2-sensitive |
| ATAATTTGTAGATCTTCCATGGC   | 73 | 2  | RDR2-resistant |
| ATAATTTTTGTCTGTTGGTTAGT   | 25 | 0  | RDR2-resistant |
| ATACAAATTGTAAGTAATGCGTTC  | 28 | 0  | RDR2-resistant |
| ATACAACACTCGGCAAAGCCTCGG  | 0  | 10 | RDR2-sensitive |
| ATACAACCATACTGTCGGCGTTTC  | 18 | 1  | RDR2-resistant |
| ATACAACGACGGACGGTCCGCATA  | 0  | 11 | RDR2-sensitive |
| ATACAAGCGGTAGACTTTTTACAT  | 1  | 76 | RDR2-sensitive |
| ATACAAGCGGTAGGATTTTTACAT  | 4  | 44 | RDR2-sensitive |
| ATACAAGCGGTAGGCTTTTTACAT  | 1  | 20 | RDR2-sensitive |
| ATACAAGGTGACTGAACCCCGACG  | 0  | 15 | RDR2-sensitive |
| ATACAATCTGTAGTGTTATATGCA  | 0  | 15 | RDR2-sensitive |
| ATACAATGTTATTTTCGTCGGCAA  | 2  | 27 | RDR2-sensitive |
| ATACACAAATTTACTCGTCGGTGC  | 0  | 12 | RDR2-sensitive |
| ATACACAAGTGTGACTCGTCGATT  | 0  | 11 | RDR2-sensitive |
| ATACACACTCTGCCTGATTGGACG  | 1  | 13 | RDR2-sensitive |
| ATACACCGGTACAACCTAGGCTTA  | 0  | 13 | RDR2-sensitive |
| ATACACGGAGACGGAACACGGTGC  | 0  | 16 | RDR2-sensitive |
| ATACACTACTGAGGGAGAGGACAG  | 0  | 9  | RDR2-sensitive |
| ATACACTATGGGTCGATTTCCGGAT | 32 | 4  | RDR2-resistant |
| ATACACTCGGTCTTTGTTGTACCT  | 24 | 0  | RDR2-resistant |
| ATACACTGTGCTGATTTCTGTGCA  | 0  | 22 | RDR2-sensitive |
| ATACAGATAGTAGAGTTACTCATT  | 23 | 2  | RDR2-resistant |
| ATACAGATCGGACTAGCACGGTTC  | 0  | 41 | RDR2-sensitive |
| ATACAGGCATGCTCGGCTACTCCA  | 20 | 0  | RDR2-resistant |
| ATACAGGTAGAGTGTGTTGGGCAC  | 0  | 11 | RDR2-sensitive |
| ATACAGTCTCCGCTGCAGAAGGTG  | 1  | 13 | RDR2-sensitive |
| ATACATATTGGATCCGTAACCTGA  | 14 | 0  | RDR2-resistant |
| ATACATCTAGTAGAGCGTGATAGC  | 0  | 10 | RDR2-sensitive |
| ATACATGACTGGGTACTCATACCC  | 17 | 0  | RDR2-resistant |
| ATACATGGCCAGTAGATAATGTCA  | 0  | 12 | RDR2-sensitive |
| ATACATGGTCTGTTGGTTAGCATC  | 0  | 10 | RDR2-sensitive |
| ATACATGTATTGTTTCTGCACGAG  | 19 | 0  | RDR2-resistant |
| ATACATGTTCCGATATCCTGCGGC  | 0  | 10 | RDR2-sensitive |
| ATACATTGTGGATCTAGGATTACA  | 15 | 0  | RDR2-resistant |
| ATACATTTCTTCTATTCTGTGGTA  | 16 | 0  | RDR2-resistant |
| ATACCAAACATCTCTGTAGTATGT  | 0  | 10 | RDR2-sensitive |
| ATACCACTTGTAGGATCTAGGACA  | 20 | 2  | RDR2-resistant |
| ATACCAGCCCGAGAACTTGGGACC  | 1  | 13 | RDR2-sensitive |
| ATACCAGTTTTACTCTGCAGAG    | 7  | 33 | RDR2-sensitive |
| ATACCATGCTATTTGTCCGGTACA  | 39 | 0  | RDR2-resistant |
| ATACCCAGGTCGCGGATCGTCCGG  | 0  | 14 | RDR2-sensitive |
| ATACCCATCGGGCTGTGCCGGCAC  | 0  | 10 | RDR2-sensitive |
| ATACCCGGATACTGTAGCTTCGGA  | 0  | 15 | RDR2-sensitive |
| ATACCCTGCTGCGTCGGATGGCAT  | 0  | 17 | RDR2-sensitive |
| ATACCGACGGATGCTGTGATGGTA  | 0  | 14 | RDR2-sensitive |
| ATACCGGCTTTGACCTTGACGGGT  | 0  | 9  | RDR2-sensitive |

|                          |     |    |                |
|--------------------------|-----|----|----------------|
| ATACCGGTCGTTGCTGGAGGCATC | 0   | 19 | RDR2-sensitive |
| ATACCGGTCGTTGCTGGAGGCGTC | 0   | 10 | RDR2-sensitive |
| ATACCTAATGTTAGGCTGTGGCGT | 0   | 15 | RDR2-sensitive |
| ATACCTACAGGTTTGTGTCGGGA  | 72  | 2  | RDR2-resistant |
| ATACCTGACTGGGGCTTCCCATAC | 0   | 19 | RDR2-sensitive |
| ATACCTGTACATGTGGGCCGCT   | 51  | 2  | RDR2-resistant |
| ATACCTTCTCGGCCTTTTGGCTA  | 73  | 3  | RDR2-resistant |
| ATACGAAGCTGTAATTCTTGGCCT | 81  | 8  | RDR2-resistant |
| ATACGACAGGATCGGCTCGGCTCT | 0   | 37 | RDR2-sensitive |
| ATACGACATGTAGTAGCCCCGAAT | 0   | 10 | RDR2-sensitive |
| ATACGACATTGTAGATGACTGT   | 0   | 12 | RDR2-sensitive |
| ATACGACGACGACGGTTCATCTGT | 0   | 9  | RDR2-sensitive |
| ATACGACTACTTAGGAACATGGCT | 0   | 84 | RDR2-sensitive |
| ATACGAGACATGTGAAGCTTGCTT | 79  | 10 | RDR2-resistant |
| ATACGAGCATCCGAACATCCATGT | 14  | 0  | RDR2-resistant |
| ATACGATCAGCGGGCGAGACGCAC | 0   | 9  | RDR2-sensitive |
| ATACGATGGGACGCATGATTCTTG | 0   | 12 | RDR2-sensitive |
| ATACGATTGGACACGGCCTGACTC | 0   | 12 | RDR2-sensitive |
| ATACGATTGGTGAGTTGAGCGACT | 0   | 18 | RDR2-sensitive |
| ATACGCAGAGTAGAAGTCGCTCCT | 0   | 25 | RDR2-sensitive |
| ATACGCCGTTCTGGCCCGTCGGAA | 0   | 14 | RDR2-sensitive |
| ATACGCGGAAGGCGGTCTGAACTC | 0   | 12 | RDR2-sensitive |
| ATACGGAACCGGGACGGAAACAG  | 0   | 12 | RDR2-sensitive |
| ATACGGAATTTTAGTGCGGATCA  | 31  | 0  | RDR2-resistant |
| ATACGGAAGTTCGGACACGGAT   | 0   | 17 | RDR2-sensitive |
| ATACGGAAGGCACGATGAACGCTA | 0   | 12 | RDR2-sensitive |
| ATACGGATTGCACGCGAAAGGCAT | 0   | 10 | RDR2-sensitive |
| ATACGGCTCGAACTTCCAGTGTGC | 0   | 9  | RDR2-sensitive |
| ATACGGGACAGACGAGAACTGCAT | 0   | 11 | RDR2-sensitive |
| ATACGGGATTTTTCGGACTTCGGC | 0   | 23 | RDR2-sensitive |
| ATACGGGCTCTGTTGGAACGGTAA | 0   | 9  | RDR2-sensitive |
| ATACGGGGCTATAGGTAGCATTGT | 0   | 9  | RDR2-sensitive |
| ATACGGGTAGTTAAGATTCGGGAC | 0   | 17 | RDR2-sensitive |
| ATACGGTCCCTGCTGGAACGCCT  | 0   | 30 | RDR2-sensitive |
| ATACGGTGCTGTCAGCGACGCGAA | 112 | 1  | RDR2-resistant |
| ATACGGTGTGATTTTTCGTGGTC  | 6   | 36 | RDR2-sensitive |
| ATACGGTGTTTATTTTCGTGGGC  | 0   | 10 | RDR2-sensitive |
| ATACGGTGTTTATTTTCGTGGTC  | 0   | 15 | RDR2-sensitive |
| ATACGGTTAAGACTCTATAACTAA | 34  | 2  | RDR2-resistant |
| ATACGTCAGACGCCGGTGTGACCT | 0   | 10 | RDR2-sensitive |
| ATACGTCAGACGCCGGTGTGATCT | 0   | 12 | RDR2-sensitive |
| ATACGTCAGACGCCGGTGTGACCT | 0   | 14 | RDR2-sensitive |
| ATACGTCGGGTAGGGTACGGATAG | 0   | 21 | RDR2-sensitive |
| ATACGCTTTTGACAAGGGACCGGC | 0   | 9  | RDR2-sensitive |
| ATACGTGCTGCAGAGCGGTGCTGC | 0   | 11 | RDR2-sensitive |
| ATACGTGCTGTTGTGTGGTGTGCT | 14  | 0  | RDR2-resistant |
| ATACGTTAGGCAGGCAACTGGCAT | 0   | 10 | RDR2-sensitive |
| ATACGTTATTTTTTTCGTGGTTC  | 0   | 10 | RDR2-sensitive |
| ATACGTTGACTTTATAGTTGTCTG | 1   | 16 | RDR2-sensitive |

|                           |     |     |                |
|---------------------------|-----|-----|----------------|
| ATACGTTGACTTTGTGGAAGCGTG  | 0   | 28  | RDR2-sensitive |
| ATACGTTTAAACTCTGCGTAGAGG  | 18  | 0   | RDR2-resistant |
| ATACTAAACTGTAGTATTGTAAAT  | 0   | 15  | RDR2-sensitive |
| ATACTAACCGGACCGGGTCGTGCC  | 0   | 49  | RDR2-sensitive |
| ATACTAATCGGACCGGGTCGTGCC  | 0   | 9   | RDR2-sensitive |
| ATACTACTAGGTTGTTTCGGGCCAA | 0   | 12  | RDR2-sensitive |
| ATACTACTCTATTAAGTCTGTAGC  | 0   | 10  | RDR2-sensitive |
| ATACTATGAATTAAGAACAAGGCA  | 0   | 10  | RDR2-sensitive |
| ATACTATGCACGGGTCGGATACAA  | 0   | 16  | RDR2-sensitive |
| ATACTATGGAGGTAGGTCTAGCTC  | 23  | 1   | RDR2-resistant |
| ATACTATTATTAGCAAGATGTCGG  | 18  | 40  | RDR2-sensitive |
| ATACTCGTATGGACTATTGGTGTC  | 0   | 30  | RDR2-sensitive |
| ATACTCTAGACTTATTTGACTGCA  | 0   | 14  | RDR2-sensitive |
| ATACTCTGTAGACTGCACAAGCGT  | 0   | 18  | RDR2-sensitive |
| ATACTCTGTGACGACGGCGGCTCT  | 7   | 33  | RDR2-sensitive |
| ATACTGAAGTTACTATGAAGGATT  | 142 | 23  | RDR2-resistant |
| ATACTGACGGATGACGTGGTCTAG  | 0   | 9   | RDR2-sensitive |
| ATACTGCAGCTTTGATGTGCCATA  | 0   | 13  | RDR2-sensitive |
| ATACTGCTGCTGTTTCATCCTTCTG | 16  | 0   | RDR2-resistant |
| ATACTGCTGTGTGACTCGTCCTAC  | 0   | 9   | RDR2-sensitive |
| ATACTGCTTATCTCTGACGGCTAT  | 0   | 9   | RDR2-sensitive |
| ATACTGGAACGGAACGGCTTCATA  | 0   | 20  | RDR2-sensitive |
| ATACTGGATTGCATGCAAAGAGCC  | 0   | 18  | RDR2-sensitive |
| ATACTGGTTCAGAACGGAGCCCTA  | 0   | 13  | RDR2-sensitive |
| ATACTGTAATTCGCGCGGACTAAA  | 1   | 13  | RDR2-sensitive |
| ATACTGTACCTATTAGCTCGGATC  | 0   | 11  | RDR2-sensitive |
| ATACTGTAGAAGACGCAGCCGCAG  | 0   | 20  | RDR2-sensitive |
| ATACTGTAGAAGAGGGGTACCCCTA | 1   | 39  | RDR2-sensitive |
| ATACTGTAGAAGAGGGGTACCCCTG | 1   | 60  | RDR2-sensitive |
| ATACTGTAGAAGAGGGGTACCCCTT | 1   | 58  | RDR2-sensitive |
| ATACTGTAGAAGCCGCAGCCGCAA  | 1   | 31  | RDR2-sensitive |
| ATACTGTAGAAGCCGCAGCCGCAG  | 33  | 904 | RDR2-sensitive |
| ATACTGTAGAAGCCGCAGCCGCAT  | 0   | 11  | RDR2-sensitive |
| ATACTGTAGAAGCCGCAGCCGCCG  | 1   | 49  | RDR2-sensitive |
| ATACTGTAGATGGCGTTGTTTGAC  | 0   | 9   | RDR2-sensitive |
| ATACTGTAGCGCGTCATGACGTT   | 0   | 9   | RDR2-sensitive |
| ATACTGTAGCGGACTACTTATCGT  | 0   | 24  | RDR2-sensitive |
| ATACTGTAGGAGAGGGGTACCCCTG | 0   | 12  | RDR2-sensitive |
| ATACTGTAGTAACGGATACCCTGT  | 2   | 15  | RDR2-sensitive |
| ATACTGTAGTAACGGGTACCCCAT  | 0   | 16  | RDR2-sensitive |
| ATACTGTAGTAACGGGTACCCCTG  | 0   | 11  | RDR2-sensitive |
| ATACTGTAGTAACGGGTACCCCTT  | 0   | 9   | RDR2-sensitive |
| ATACTGTAGTAAGGGATACCCTGT  | 0   | 14  | RDR2-sensitive |
| ATACTGTAGTAAGGGGTACCCTAG  | 0   | 19  | RDR2-sensitive |
| ATACTGTAGTAGAGGGGTACCCCTA | 0   | 20  | RDR2-sensitive |
| ATACTGTAGTAGAGGGGTACCCCTG | 2   | 44  | RDR2-sensitive |
| ATACTGTAGTAGAGGGGTACCCCTT | 0   | 17  | RDR2-sensitive |
| ATACTGTAGTATTGAGCAATACTA  | 0   | 9   | RDR2-sensitive |
| ATACTGTAGTATTGAGCAACTACTG | 0   | 14  | RDR2-sensitive |

|                           |    |    |                |
|---------------------------|----|----|----------------|
| ATACTGTATCTCAGCTGGAGGTGC  | 39 | 10 | RDR2-resistant |
| ATACTGTATTTATAGCGACGATTG  | 0  | 15 | RDR2-sensitive |
| ATACTGTCCAAGCTTCGGCATCTT  | 26 | 3  | RDR2-resistant |
| ATACTGTTCGTAGCCCTGATGGCCG | 0  | 15 | RDR2-sensitive |
| ATACTGTGCTGCACTATAGCTTGT  | 19 | 0  | RDR2-resistant |
| ATACTGTGGAAGAGGGTACCCCTG  | 0  | 9  | RDR2-sensitive |
| ATACTGTGGAAGAGGGTACCCCTT  | 0  | 11 | RDR2-sensitive |
| ATACTGTGGCGTAGACTTCGGCGT  | 0  | 33 | RDR2-sensitive |
| ATACTGTGGCGTGCTGAGCGTCTA  | 0  | 27 | RDR2-sensitive |
| ATACTGTTATGAGATGGAGGACGA  | 0  | 10 | RDR2-sensitive |
| ATACTGTTTCATGCTGTAGAGGCTA | 0  | 9  | RDR2-sensitive |
| ATACTGTTGTGGTATCTGGATCGT  | 0  | 9  | RDR2-sensitive |
| ATACTGTTTTTAGACGATTGCATG  | 21 | 2  | RDR2-resistant |
| ATACTTACCAGTTCGGACCGGCC   | 0  | 14 | RDR2-sensitive |
| ATACTTAGTAGATTTTGATAGAGC  | 20 | 2  | RDR2-resistant |
| ATACTTATAGGTATGGATCTGGAC  | 0  | 12 | RDR2-sensitive |
| ATACTTATTTTCGACTATGGCTAG  | 14 | 0  | RDR2-resistant |
| ATACTTCGGGCTGACACGATACGG  | 0  | 26 | RDR2-sensitive |
| ATACTTCGGGCTGACACGGTACGG  | 0  | 24 | RDR2-sensitive |
| ATACTTCGGGCTGGCACGACACGG  | 0  | 9  | RDR2-sensitive |
| ATACTTCGGGCTGGCACGGCACGG  | 0  | 12 | RDR2-sensitive |
| ATACTTCGGGCTTGACGACACGG   | 0  | 20 | RDR2-sensitive |
| ATACTTGGTGACTTGCTGGTGCAT  | 17 | 0  | RDR2-resistant |
| ATACTTGTGAATTTTGTTCATAC   | 21 | 2  | RDR2-resistant |
| ATAGAAATTTTATTGGTTGTCAGC  | 21 | 0  | RDR2-resistant |
| ATAGAACAGTAGTAGCTTGTGCAT  | 49 | 3  | RDR2-resistant |
| ATAGAACCGGACCGTGCCGGGCAT  | 0  | 13 | RDR2-sensitive |
| ATAGAACCGGATCGTGCTAGGCTT  | 0  | 17 | RDR2-sensitive |
| ATAGAACGACTGCTGACGGTTCCTT | 0  | 10 | RDR2-sensitive |
| ATAGAACGGTAGAATGGACGGCTA  | 0  | 9  | RDR2-sensitive |
| ATAGAACTGCCGTGGCGCTGACGT  | 1  | 66 | RDR2-sensitive |
| ATAGAACTTATGATCAGTTACGGA  | 14 | 0  | RDR2-resistant |
| ATAGAACTCGGACTCGAATCGGGCC | 0  | 9  | RDR2-sensitive |
| ATAGAACTGTATGAGGCTGGAAGAG | 29 | 1  | RDR2-resistant |
| ATAGACCAGAGGACAGACCGGCAA  | 0  | 16 | RDR2-sensitive |
| ATAGACGACTGCTGACGGCGCTTT  | 0  | 12 | RDR2-sensitive |
| ATAGACGACTGCTGACGGTCCTTT  | 0  | 17 | RDR2-sensitive |
| ATAGACGCGATGGTAGAACGTGGC  | 0  | 16 | RDR2-sensitive |
| ATAGACGGCTCTTTTAAATTTGTT  | 34 | 0  | RDR2-resistant |
| ATAGACGGCTGCTGACGGACCTTT  | 0  | 10 | RDR2-sensitive |
| ATAGACGGCTGCTGACGGCCCTTT  | 8  | 49 | RDR2-sensitive |
| ATAGACGGCTGCTGACGGCTCTTT  | 0  | 10 | RDR2-sensitive |
| ATAGACGGCTGCTGACGGTCCTTT  | 6  | 54 | RDR2-sensitive |
| ATAGACGGCTGCTGATGGTCCTTT  | 0  | 14 | RDR2-sensitive |
| ATAGACGGCTGTTGACGGTCCTTG  | 0  | 55 | RDR2-sensitive |
| ATAGACGGGGACGAGAGATGGA    | 18 | 1  | RDR2-resistant |
| ATAGACGTACGGATGTAGTTCGGC  | 0  | 10 | RDR2-sensitive |
| ATAGACGTAGCACCGTTGGATGTG  | 0  | 16 | RDR2-sensitive |
| ATAGACGTCTAGACCTGATCCGGC  | 0  | 10 | RDR2-sensitive |

|                           |    |    |                |
|---------------------------|----|----|----------------|
| ATAGACGTCTGAACCTGGTCCGGC  | 0  | 21 | RDR2-sensitive |
| ATAGACGTGTGGATCTGATCCGGC  | 0  | 10 | RDR2-sensitive |
| ATAGACTACTGTCTCCGACGGCC   | 62 | 2  | RDR2-resistant |
| ATAGACTGATTCAGCGTCCGGCTTG | 20 | 0  | RDR2-resistant |
| ATAGACTGGACTGCTAATTAGGCC  | 0  | 11 | RDR2-sensitive |
| ATAGACTGGGGCAGAACGCGGAAT  | 0  | 10 | RDR2-sensitive |
| ATAGACTGTAACGGCGAGCGGTAT  | 0  | 12 | RDR2-sensitive |
| ATAGACTGTAGTGTGGTGTCTAGG  | 0  | 10 | RDR2-sensitive |
| ATAGACTTAGGGCCCTGGCGACGG  | 0  | 15 | RDR2-sensitive |
| ATAGAGACGGGTGGATTAAGGCGT  | 0  | 9  | RDR2-sensitive |
| ATAGAGCTGCAGGTCTGGCGAGCT  | 0  | 9  | RDR2-sensitive |
| ATAGAGGACGAAGACGTACGCTAC  | 0  | 22 | RDR2-sensitive |
| ATAGAGGACGGAATCTTTTAGAGT  | 2  | 23 | RDR2-sensitive |
| ATAGAGGACGTTGCTGGAGACAGT  | 1  | 12 | RDR2-sensitive |
| ATAGAGGATGAATATAGAGGACGT  | 1  | 13 | RDR2-sensitive |
| ATAGAGGATGGATATAGAGGACGT  | 1  | 20 | RDR2-sensitive |
| ATAGAGGATGTATATAGAGGACGT  | 1  | 27 | RDR2-sensitive |
| ATAGAGTTTCAATGTAGACCGGCT  | 0  | 11 | RDR2-sensitive |
| ATAGATAATTTTCGTCGGCAGGCC  | 0  | 11 | RDR2-sensitive |
| ATAGATCCATATGCTCGTTGGACC  | 41 | 10 | RDR2-resistant |
| ATAGATCTCTCCTGTACGTGGCTA  | 0  | 10 | RDR2-sensitive |
| ATAGATCTGGCGAGCTGACGCAAG  | 0  | 11 | RDR2-sensitive |
| ATAGATGGACGGTGTAGATTGGCT  | 0  | 28 | RDR2-sensitive |
| ATAGATGGATCAGTTGTTGAGGAC  | 21 | 1  | RDR2-resistant |
| ATAGATGGCATAGTAGACGTCTCC  | 0  | 10 | RDR2-sensitive |
| ATAGATGGCTCTGGTGTATCGTCGT | 0  | 10 | RDR2-sensitive |
| ATAGATGTCATAGCTTGATTATTA  | 23 | 1  | RDR2-resistant |
| ATAGATGTGGAACAGACGACGCAC  | 0  | 9  | RDR2-sensitive |
| ATAGATTGAGTTATGATTGTTTGT  | 15 | 0  | RDR2-resistant |
| ATAGATTGTAGATGGCAGCTCCGC  | 0  | 11 | RDR2-sensitive |
| ATAGATTGTAGCTGTAGTAGTCGG  | 0  | 18 | RDR2-sensitive |
| ATAGATTTATTGACTGGGAGGGTT  | 99 | 35 | RDR2-resistant |
| ATAGATTTTGACGAGCTGGAACGA  | 0  | 12 | RDR2-sensitive |
| ATAGCACATGACGCTGAACTACGG  | 0  | 10 | RDR2-sensitive |
| ATAGCACTGGAAGGGCACAGCTGA  | 0  | 11 | RDR2-sensitive |
| ATAGCAGCAGACTACAGCGCTCAA  | 0  | 12 | RDR2-sensitive |
| ATAGCATATTTTCGTCGGCAGGCC  | 0  | 12 | RDR2-sensitive |
| ATAGCATTGATCAACTTCATTAAG  | 28 | 0  | RDR2-resistant |
| ATAGCCAACGGACTGGTTCGGCGC  | 0  | 14 | RDR2-sensitive |
| ATAGCCGACGGCTGTCAGACTGGC  | 0  | 13 | RDR2-sensitive |
| ATAGCCTATTTTCGTCGGCAGGCC  | 0  | 13 | RDR2-sensitive |
| ATAGCCTATTTTCGTCGGCAGGCT  | 0  | 9  | RDR2-sensitive |
| ATAGCCTCGGGGTGGACAACGGTT  | 17 | 1  | RDR2-resistant |
| ATAGCGAAGCTGACATGTATCATT  | 23 | 0  | RDR2-resistant |
| ATAGCGACGATTGTCAGACGCCAA  | 0  | 10 | RDR2-sensitive |
| ATAGCGCACCGGACTGTTAGGTGT  | 0  | 13 | RDR2-sensitive |
| ATAGCGGATGTAGACGTTCCGGTAC | 0  | 17 | RDR2-sensitive |
| ATAGCGGCGGGACGGAGATGGTGT  | 19 | 0  | RDR2-resistant |
| ATAGCGGCGGGACGTGGATGGGGT  | 22 | 0  | RDR2-resistant |



|                           |     |    |                |
|---------------------------|-----|----|----------------|
| ATAGCGGCGGGACGTGGATGGTGT  | 34  | 1  | RDR2-resistant |
| ATAGCGTACTGTGGCATCCGTCAT  | 0   | 13 | RDR2-sensitive |
| ATAGCGTAGTGACTGAGTCGTTGG  | 0   | 13 | RDR2-sensitive |
| ATAGCGTTTCTGTGGTCTCGGTAA  | 2   | 60 | RDR2-sensitive |
| ATAGCTACGATTCGTTGGTCGTTA  | 217 | 1  | RDR2-resistant |
| ATAGCTACGATTCGTTGGTCGTTT  | 14  | 0  | RDR2-resistant |
| ATAGCTAGTCTGTCGGAGATTTAT  | 0   | 9  | RDR2-sensitive |
| ATAGCTATTGGATCTGATCCGGTT  | 17  | 1  | RDR2-resistant |
| ATAGCTCGCGAACCGGCTCGGCTT  | 0   | 9  | RDR2-sensitive |
| ATAGCTCTGAGATGGTATCTTCGT  | 0   | 11 | RDR2-sensitive |
| ATAGGAAGTATTCTCTATCGTCGT  | 1   | 26 | RDR2-sensitive |
| ATAGGACAAGTATGTGACTGGTAA  | 0   | 21 | RDR2-sensitive |
| ATAGGACAGTTGTCACGGTTCTGT  | 0   | 12 | RDR2-sensitive |
| ATAGGACCCTCATGACATTGGCGT  | 0   | 28 | RDR2-sensitive |
| ATAGGACCCTGCTGGAGAGAGCAT  | 0   | 14 | RDR2-sensitive |
| ATAGGACGACTCGGTAGAAGCCAT  | 0   | 82 | RDR2-sensitive |
| ATAGGACGGAGGATATGATGTGTA  | 185 | 0  | RDR2-resistant |
| ATAGGACTGGACGGTCCGTGACCT  | 0   | 9  | RDR2-sensitive |
| ATAGGATTAGAAGTTGGATGGTCG  | 16  | 0  | RDR2-resistant |
| ATAGGCCACTGTAGAGTAGGCCGT  | 0   | 10 | RDR2-sensitive |
| ATAGGCTATGGCGCCGAGGTACGT  | 0   | 16 | RDR2-sensitive |
| ATAGGCTCTGATACCACCTGCAGC  | 30  | 2  | RDR2-resistant |
| ATAGGCTGGAATGAATACGCGCAC  | 0   | 27 | RDR2-sensitive |
| ATAGGGACAACCAGAATCGTGCGC  | 1   | 18 | RDR2-sensitive |
| ATAGGGAGCGCTGTAGGAGGCACC  | 0   | 15 | RDR2-sensitive |
| ATAGGGGCGCTGTAGGGGTACCGC  | 0   | 24 | RDR2-sensitive |
| ATAGGTAATCAGGTCGGTGGGCAT  | 0   | 14 | RDR2-sensitive |
| ATAGGTACAGTATCGGACAGCGAC  | 0   | 9  | RDR2-sensitive |
| ATAGGTACTGTGGATCGGCCTAGT  | 1   | 17 | RDR2-sensitive |
| ATAGGTAGGACGGCGCGGCTGCTT  | 44  | 1  | RDR2-resistant |
| ATAGGTAGGGGACGGACGTAGAGG  | 0   | 34 | RDR2-sensitive |
| ATAGGTCTGCATGATATTGATGGT  | 1   | 75 | RDR2-sensitive |
| ATAGGTCTGTTTGGTTCATGGCTA  | 0   | 14 | RDR2-sensitive |
| ATAGGTGCGGGTGTGGTTTGATGG  | 0   | 9  | RDR2-sensitive |
| ATAGGTTAGATTGTGCATAGGCTT  | 23  | 0  | RDR2-resistant |
| ATAGTACTCGGATAGTGCGGCTTT  | 0   | 10 | RDR2-sensitive |
| ATAGTAGAATGTCTTAGATGTCAT  | 30  | 0  | RDR2-resistant |
| ATAGTAGAGATGAATCATGACACA  | 15  | 0  | RDR2-resistant |
| ATAGTAGTCGTGCGAACGCGCGCAA | 0   | 10 | RDR2-sensitive |
| ATAGTAGTCGTGCGAACGCGCGCGA | 1   | 13 | RDR2-sensitive |
| ATAGTAGTGCTCTGTGCAAAGAGG  | 0   | 13 | RDR2-sensitive |
| ATAGTATTGACTGAGAGAGGCATT  | 29  | 5  | RDR2-resistant |
| ATAGTCAACTGTACAGGGCCTTAA  | 0   | 47 | RDR2-sensitive |
| ATAGTCACGACTATAGATGGCCAG  | 0   | 18 | RDR2-sensitive |
| ATAGTCACGGACGGATATTATCTA  | 0   | 23 | RDR2-sensitive |
| ATAGTCCGGCCTAGCTAGAAGCGT  | 0   | 13 | RDR2-sensitive |
| ATAGTCTAGTGTAGGTGCGGATGT  | 0   | 17 | RDR2-sensitive |
| ATAGTCTGATTGTAGGTGGTAGTC  | 0   | 9  | RDR2-sensitive |
| ATAGTGACCAGAGCCGGACGGCCT  | 382 | 0  | RDR2-resistant |

|                           |    |    |                |
|---------------------------|----|----|----------------|
| ATAGTGA CTGTCTGCTTGGGCGTG | 22 | 1  | RDR2-resistant |
| ATAGTGCCGGGCTGGGCATGACAC  | 0  | 14 | RDR2-sensitive |
| ATAGTGGACGCGTAGAACGGCGTC  | 0  | 14 | RDR2-sensitive |
| ATAGTGGATTTTATGTTGTGCATT  | 29 | 0  | RDR2-resistant |
| ATAGTGTCTGTCTGGACGTCATC   | 0  | 31 | RDR2-sensitive |
| ATAGTTGGACATAGATGGCAATGG  | 0  | 13 | RDR2-sensitive |
| ATAGTTGGACCTATCTCGTGACGG  | 0  | 13 | RDR2-sensitive |
| ATAGTTGGGGTAGATATGGGACGG  | 0  | 9  | RDR2-sensitive |
| ATAGTTGGTGGACGGAGGCAGGAC  | 0  | 13 | RDR2-sensitive |
| ATAGTTGTTGACTTAGATTTACGG  | 0  | 14 | RDR2-sensitive |
| ATAGTTTATGTGTAGTTCGGTATA  | 37 | 1  | RDR2-resistant |
| ATAGTTTGGACTGGTGGGAGGGCT  | 0  | 11 | RDR2-sensitive |
| ATAGTTTGTTTGATGGTACGTGCT  | 42 | 4  | RDR2-resistant |
| ATAGTTTACACTGTAGATTGCAT   | 0  | 16 | RDR2-sensitive |
| ATAGTTTACTGTAGTGATCGGCG   | 0  | 21 | RDR2-sensitive |
| ATATAAACTTTGATTAGCCGGAAC  | 5  | 50 | RDR2-sensitive |
| ATATAAACTTTGATTAGCCGGAAT  | 4  | 17 | RDR2-sensitive |
| ATATAAACTTTGATTAGTCGGAAC  | 0  | 11 | RDR2-sensitive |
| ATATAAATTGTGGTCTGCTTTTTC  | 0  | 10 | RDR2-sensitive |
| ATATAAGACAGTAGTGTAGACGTC  | 0  | 19 | RDR2-sensitive |
| ATATAAGTGAATGATCTGTGGAA   | 1  | 63 | RDR2-sensitive |
| ATATAAGTGGTGGACTAGCACGGC  | 0  | 25 | RDR2-sensitive |
| ATATAATTGATGAATTGGTCGGCC  | 18 | 0  | RDR2-resistant |
| ATATACCAGGAATGTAGTAGGTAA  | 0  | 9  | RDR2-sensitive |
| ATATACCTTCGGCATATACTTGTG  | 0  | 13 | RDR2-sensitive |
| ATATACCTTGCTGTGAGACAGAAT  | 47 | 1  | RDR2-resistant |
| ATATACGGTGTGTATTTTCGTCGG  | 0  | 14 | RDR2-sensitive |
| ATATACTCGTATGGACTATTGGTG  | 0  | 12 | RDR2-sensitive |
| ATATACTGTAGCGGACTACTTATC  | 0  | 12 | RDR2-sensitive |
| ATATAGAGACGCGATAGCCCTCAG  | 0  | 23 | RDR2-sensitive |
| ATATAGAGTTTCGTTGATTGTTGT  | 75 | 2  | RDR2-resistant |
| ATATAGATCGGAGCGGCAATCCTT  | 0  | 12 | RDR2-sensitive |
| ATATAGCGTTTCTGTGGTCTCGGT  | 0  | 10 | RDR2-sensitive |
| ATATAGCGTTTGTGTGGTCTCGGT  | 0  | 9  | RDR2-sensitive |
| ATATAGGACCGTCCAGTACGACAT  | 0  | 12 | RDR2-sensitive |
| ATATAGGACGAGGATGTGCCTCAT  | 0  | 16 | RDR2-sensitive |
| ATATAGGGCAGGTATAACGGGAGC  | 0  | 12 | RDR2-sensitive |
| ATATAGTAGTCGTCTGAACGCGCAC | 1  | 12 | RDR2-sensitive |
| ATATATAAATCTGAAATTCTAATT  | 15 | 0  | RDR2-resistant |
| ATATATAAGTATGTTATTGCGTCG  | 15 | 0  | RDR2-resistant |
| ATATATACTGGAACAGAACGGGCTC | 0  | 12 | RDR2-sensitive |
| ATATATATATTTGCGTCGGATACC  | 58 | 1  | RDR2-resistant |
| ATATATATGCAGAAATTCATTTCCC | 24 | 2  | RDR2-resistant |
| ATATATCGAAGCAATTTCTAGTGG  | 23 | 3  | RDR2-resistant |
| ATATATCGAAGTCTGCATGATACT  | 1  | 32 | RDR2-sensitive |
| ATATATGAACATGCAGACTGTGGC  | 0  | 11 | RDR2-sensitive |
| ATATATGGACACCATGATGGGGCG  | 16 | 0  | RDR2-resistant |
| ATATATGTACATGAACCTTTGGAC  | 15 | 0  | RDR2-resistant |
| ATATATTGCAGAGGACTACATGTT  | 62 | 0  | RDR2-resistant |

|                           |     |    |                |
|---------------------------|-----|----|----------------|
| ATATATTGGACTATATCAGGCTAC  | 0   | 14 | RDR2-sensitive |
| ATATATTGTCTTTATGTCGTCGTC  | 0   | 10 | RDR2-sensitive |
| ATATATTTCTCGGTCTTTTGGTTA  | 26  | 0  | RDR2-resistant |
| ATATATTTTCGTCGGCCGCCCCAC  | 0   | 13 | RDR2-sensitive |
| ATATATTTTCGTCGGCCGCCCCAT  | 0   | 9  | RDR2-sensitive |
| ATATCAAGGACTATGGCGTCATCT  | 0   | 10 | RDR2-sensitive |
| ATATCAAGTTGGAAGTATGCTTTT  | 15  | 0  | RDR2-resistant |
| ATATCATACTGATGTTTGTCTGTTT | 0   | 14 | RDR2-sensitive |
| ATATCATGACACGTGGACAGGTTT  | 21  | 2  | RDR2-resistant |
| ATATCCATCGGGCCGTATCTAGGC  | 0   | 11 | RDR2-sensitive |
| ATATCCCTACGTTTGATTGTCTGT  | 0   | 11 | RDR2-sensitive |
| ATATCCGACGGCTGTCAGAGGGGC  | 0   | 10 | RDR2-sensitive |
| ATATCCGAGGGCTGGGAGGCGGAC  | 0   | 17 | RDR2-sensitive |
| ATATCCTGCGGGCTAGTACGGCAC  | 0   | 11 | RDR2-sensitive |
| ATATCGCCGAGCTCTGACGTGGCT  | 0   | 12 | RDR2-sensitive |
| ATATCGCTGTTTGAATCCGGGTAT  | 1   | 14 | RDR2-sensitive |
| ATATCGGACCGTGCCAGCCCGGCA  | 0   | 10 | RDR2-sensitive |
| ATATCGGACGGTCTACGACATATC  | 0   | 11 | RDR2-sensitive |
| ATATCGGCTAGTTGATTTTCGGTG  | 39  | 3  | RDR2-resistant |
| ATATCGGCTATGTGATTTTCGGTG  | 53  | 3  | RDR2-resistant |
| ATATCGGGCTAAACGGCGTAACTT  | 0   | 47 | RDR2-sensitive |
| ATATCGGGCTGTGCTGTCCAACGG  | 0   | 9  | RDR2-sensitive |
| ATATCGGGTCTGTTTGTTCGGCT   | 1   | 12 | RDR2-sensitive |
| ATATCGGTTAGTTGATTTTCGGTG  | 23  | 0  | RDR2-resistant |
| ATATCTATATCTAGCTCCGTCGGG  | 0   | 9  | RDR2-sensitive |
| ATATCTCACATGTGGGTCGTCCGG  | 0   | 9  | RDR2-sensitive |
| ATATCTGATCTGTTAGATGGTCTT  | 15  | 0  | RDR2-resistant |
| ATATCTGCCTCTGATAGTCGGAAT  | 0   | 9  | RDR2-sensitive |
| ATATCTGTATGAATAATTTCTAAC  | 17  | 0  | RDR2-resistant |
| ATATCTTAGAATTCTCTTAACGGC  | 55  | 11 | RDR2-resistant |
| ATATCTTAGAATTCTTTTTCGGGC  | 53  | 1  | RDR2-resistant |
| ATATGAAATTTGTGGAAGTGCTAT  | 33  | 0  | RDR2-resistant |
| ATATGAACAAGTAGAACATTAAGA  | 43  | 3  | RDR2-resistant |
| ATATGAACATGCAGACTGTGGCCA  | 0   | 9  | RDR2-sensitive |
| ATATGAAGTGTGTAGGCATGACA   | 0   | 11 | RDR2-sensitive |
| ATATGAATCGTGATCGTGTCTGTC  | 0   | 12 | RDR2-sensitive |
| ATATGACAATATTCAGTAGACTTA  | 134 | 6  | RDR2-resistant |
| ATATGACAATTCTTAGAAATCTTA  | 14  | 0  | RDR2-resistant |
| ATATGACACTGTGGACAGCGTTTA  | 0   | 16 | RDR2-sensitive |
| ATATGACATTTTGTCTGATAGGGCC | 34  | 1  | RDR2-resistant |
| ATATGACGCAGGACGACCGTTGAA  | 15  | 0  | RDR2-resistant |
| ATATGACTGCGGAAGATTGTATGG  | 0   | 10 | RDR2-sensitive |
| ATATGACTGGACGGAACCCGGCAT  | 0   | 13 | RDR2-sensitive |
| ATATGAGTGTAGATGGTAGAAGAA  | 0   | 11 | RDR2-sensitive |
| ATATGAGTTTATGCAGTTGGGATT  | 30  | 0  | RDR2-resistant |
| ATATGATATCATGACACGTGGACA  | 35  | 6  | RDR2-resistant |
| ATATGATCATCGATGACGAGCGTG  | 0   | 14 | RDR2-sensitive |
| ATATGATCTTGTCTGTTGGTTT    | 28  | 0  | RDR2-resistant |
| ATATGATGTGTAGTCGGGAAAGAA  | 14  | 0  | RDR2-resistant |

|                           |    |    |                |
|---------------------------|----|----|----------------|
| ATATGATTGTTTAAGTGATTTCAA  | 15 | 0  | RDR2-resistant |
| ATATGATTTGTGGGTCTGACGGTA  | 0  | 14 | RDR2-sensitive |
| ATATGCATTCTGTAGGAAGACAAC  | 32 | 3  | RDR2-resistant |
| ATATGCTGCTGGATTCTCAAGACG  | 21 | 0  | RDR2-resistant |
| ATATGCTGGAGCGGTACTACTCAA  | 59 | 3  | RDR2-resistant |
| ATATGCTTGATAATTGAGGACTAA  | 21 | 0  | RDR2-resistant |
| ATATGCTTTTTTGAACAGATGATG  | 17 | 1  | RDR2-resistant |
| ATATGGACCCGGCTGAAAGACGTA  | 0  | 13 | RDR2-sensitive |
| ATATGGACGGTCTACACTATTGAC  | 0  | 9  | RDR2-sensitive |
| ATATGGACGGTGTACTTAGCATCA  | 0  | 13 | RDR2-sensitive |
| ATATGGAGACTACAGGAGCCGCTC  | 0  | 10 | RDR2-sensitive |
| ATATGGAGTGGTTAATAATGGAAA  | 17 | 0  | RDR2-resistant |
| ATATGGATCGGACTACCATGGCCC  | 0  | 12 | RDR2-sensitive |
| ATATGGCAACTGTCGACGAGCACG  | 31 | 0  | RDR2-resistant |
| ATATGGGCAAACGACGGTATCTG   | 43 | 0  | RDR2-resistant |
| ATATGGGCTAAACGGGCTAAACGG  | 0  | 10 | RDR2-sensitive |
| ATATGGGCTAAGTGAACCGGTAG   | 0  | 17 | RDR2-sensitive |
| ATATGGTGC ACTGAATTTAAGCAT | 23 | 0  | RDR2-resistant |
| ATATGGTTGTATGTACAAATTTAA  | 20 | 2  | RDR2-resistant |
| ATATGTAGACTCCAGAAGCCGTTT  | 0  | 10 | RDR2-sensitive |
| ATATGTAGGACGGATTATAAGCAA  | 0  | 11 | RDR2-sensitive |
| ATATGTAGTTCTAGTGAGAGGTGT  | 0  | 12 | RDR2-sensitive |
| ATATGTATAATATAGATCTTGGAC  | 32 | 1  | RDR2-resistant |
| ATATGTATTACTATTGAAGATGTT  | 22 | 0  | RDR2-resistant |
| ATATGTATTGAGAATAATCGAATA  | 0  | 11 | RDR2-sensitive |
| ATATGTATTTTCTGTGATCTTCGG  | 0  | 11 | RDR2-sensitive |
| ATATGTCACTCTCTGTATCGTCGT  | 0  | 10 | RDR2-sensitive |
| ATATGTCAGACTAAAGCGTCCGTT  | 0  | 18 | RDR2-sensitive |
| ATATGTGAAGGTAGAAATAACAAC  | 40 | 0  | RDR2-resistant |
| ATATGTGATCGAATTCGGATGCGC  | 0  | 10 | RDR2-sensitive |
| ATATGTGCACTATGTAGAAGACCG  | 0  | 10 | RDR2-sensitive |
| ATATGTGCTGCAGCGGTGGACTGT  | 0  | 14 | RDR2-sensitive |
| ATATGTGGACACTGATATGTGCAT  | 0  | 10 | RDR2-sensitive |
| ATATGTGGATACTCGGCTATAAGT  | 22 | 0  | RDR2-resistant |
| ATATGTGTCGGGCTAGCACGGCCT  | 0  | 9  | RDR2-sensitive |
| ATATGTTCCGACGCTCAGAAAGGC  | 41 | 8  | RDR2-resistant |
| ATATGTTCTTAGTGTAGGCGTGCA  | 1  | 21 | RDR2-sensitive |
| ATATGTTGCAGGTTTCGTCGTTGTC | 33 | 1  | RDR2-resistant |
| ATATGTTTATGTTCTGTAGGAGAC  | 30 | 1  | RDR2-resistant |
| ATATTAATGTAGACGAGATTAGAC  | 25 | 2  | RDR2-resistant |
| ATATTACTGGACGGTTCGACCACA  | 0  | 10 | RDR2-sensitive |
| ATATTAGATGATCATGTTGGGTGC  | 0  | 11 | RDR2-sensitive |
| ATATTAGATGTGTCGGCGTGTGCA  | 29 | 1  | RDR2-resistant |
| ATATTAGCAAGGGATGAGCTCACT  | 53 | 4  | RDR2-resistant |
| ATATTATTTGATCGGATATCGGAT  | 8  | 50 | RDR2-sensitive |
| ATATTCAAATGGGTGCTCGTGATC  | 0  | 11 | RDR2-sensitive |
| ATATTCATGTCGTA CTGGACGGTC | 0  | 35 | RDR2-sensitive |
| ATATTCCGGGAATGTAGCAGGTAA  | 0  | 10 | RDR2-sensitive |
| ATATTCGACTTTAGTGCACGGTTC  | 0  | 9  | RDR2-sensitive |

|                           |     |    |                |
|---------------------------|-----|----|----------------|
| ATATTCGGATTCGGACTATGCGGG  | 15  | 0  | RDR2-resistant |
| ATATTCGGCATTCTATAGATAT    | 42  | 0  | RDR2-resistant |
| ATATTCGGGACGGATACGGGTAAT  | 4   | 18 | RDR2-sensitive |
| ATATTCGGGACGGATATGAGTAAT  | 0   | 9  | RDR2-sensitive |
| ATATTGACTGTTGTGCGACGGATAT | 0   | 9  | RDR2-sensitive |
| ATATTGATCAATTCGCCGGCTAC   | 17  | 1  | RDR2-resistant |
| ATATTGCAGAGGACTACATGTTTC  | 335 | 0  | RDR2-resistant |
| ATATTGCCTGGTACTGTGATCGGT  | 0   | 16 | RDR2-sensitive |
| ATATTGGAATGTCATGATAGTCTT  | 19  | 1  | RDR2-resistant |
| ATATTGGACTGGGCCACGGCCTGA  | 0   | 12 | RDR2-sensitive |
| ATATTGGCGCTTAGGGCTGGGCAA  | 0   | 18 | RDR2-sensitive |
| ATATTGGTTGGTACTGTGACCGGC  | 0   | 11 | RDR2-sensitive |
| ATATTGTAGAAGCCGCAGCCGCAG  | 1   | 16 | RDR2-sensitive |
| ATATTGTCTTTATGTCGTCGTCGT  | 0   | 10 | RDR2-sensitive |
| ATATTGTTATATATGAACCTTGAT  | 25  | 0  | RDR2-resistant |
| ATATTGTTTGTGCTTTCGGGGTAC  | 28  | 4  | RDR2-resistant |
| ATATTGTTTGTGCATCTGTGCGGAT | 159 | 7  | RDR2-resistant |
| ATATTTAAATTTCACTCTGCGAAT  | 16  | 0  | RDR2-resistant |
| ATATTTAGCAACTATGACGTCGGG  | 0   | 13 | RDR2-sensitive |
| ATATTTAGCAACTGTGACTTCGGG  | 0   | 16 | RDR2-sensitive |
| ATATTTATGTCTAGACTCGTTGGC  | 0   | 17 | RDR2-sensitive |
| ATATTTACAGAGGCTGTGTCGTCGT | 0   | 9  | RDR2-sensitive |
| ATATTTCGATTTGAGGCATTAGTT  | 0   | 20 | RDR2-sensitive |
| ATATTTCTCGGTCTTTTGTTAAA   | 15  | 0  | RDR2-resistant |
| ATATTTGTAGGGATAGGATGGATA  | 97  | 5  | RDR2-resistant |
| ATATTTTACATGGTCGTCCAACAG  | 0   | 11 | RDR2-sensitive |
| ATATTTTACTGTAAATGGCGATGC  | 0   | 10 | RDR2-sensitive |
| ATATTTTAGCAAGTCGGCAATACC  | 114 | 12 | RDR2-resistant |
| ATATTTTCTGCGGAATCGTCGTTT  | 88  | 1  | RDR2-resistant |
| ATATTTTGGAGACTGTGACGTTGT  | 0   | 14 | RDR2-sensitive |
| ATATTTTGGAGACTGTGTCGTTGT  | 0   | 9  | RDR2-sensitive |
| ATATTTTGGGGTGTAGGTTCCGTT  | 0   | 10 | RDR2-sensitive |
| ATATTTTCTTCGCGGATACGGAT   | 0   | 16 | RDR2-sensitive |
| ATATTTTCTTTTCGTCGACGCTA   | 0   | 10 | RDR2-sensitive |
| ATCAATAATTTGTATGTCGTCGC   | 0   | 10 | RDR2-sensitive |
| ATCAACAGTGTCTGACGTGAGGCT  | 101 | 8  | RDR2-resistant |
| ATCAACCATCTAGGACAAGGGCAT  | 0   | 32 | RDR2-sensitive |
| ATCAACCCATCTGGACAGAGGCAT  | 0   | 9  | RDR2-sensitive |
| ATCAACGGAACGCGGACTCGGCGC  | 0   | 21 | RDR2-sensitive |
| ATCAACTCATCTGGACAGGGGCAC  | 0   | 12 | RDR2-sensitive |
| ATCAACTCATCTGGGCAGGGACAC  | 0   | 15 | RDR2-sensitive |
| ATCAACTCGGAGACGACGACTGGC  | 0   | 34 | RDR2-sensitive |
| ATCAACTCTCTGTCAGGATGACT   | 59  | 3  | RDR2-resistant |
| ATCAACTGTCCACTCTGCAACGGC  | 0   | 29 | RDR2-sensitive |
| ATCAACTGTCTACTCTACAACGGC  | 1   | 19 | RDR2-sensitive |
| ATCAACTGTGGGGCATATATGCAT  | 58  | 8  | RDR2-resistant |
| ATCAAGACGGTGTGGGACAAGGCA  | 15  | 0  | RDR2-resistant |
| ATCAAGCAGACTGTTGCGCGACAT  | 0   | 31 | RDR2-sensitive |
| ATCAAGCAGACTGTTGCGCGACCT  | 0   | 12 | RDR2-sensitive |

|                           |      |    |                |
|---------------------------|------|----|----------------|
| ATCAAGCGGTCTGTCGGTCGTCAT  | 0    | 9  | RDR2-sensitive |
| ATCAAGCTGACTGAGAGACGCCAC  | 0    | 11 | RDR2-sensitive |
| ATCAAGCTGACTGGGAGACGCCAC  | 0    | 20 | RDR2-sensitive |
| ATCAAGTTCGGTGTAGTTGACGCG  | 0    | 9  | RDR2-sensitive |
| ATCAAGTTGGAAGTATGCTTTTAT  | 31   | 0  | RDR2-resistant |
| ATCAATACTGCATGGACTACGGAT  | 0    | 15 | RDR2-sensitive |
| ATCAATAGATTGATTCGGTTGCC   | 0    | 9  | RDR2-sensitive |
| ATCAATGTTTGACTGTGCGGTGCC  | 1717 | 88 | RDR2-resistant |
| ATCAATTGATTGATTGTAGCGATA  | 46   | 3  | RDR2-resistant |
| ATCACAAATGAACGATGACGGTCT  | 0    | 13 | RDR2-sensitive |
| ATCACACATGTAGACAGTTGGCGC  | 1    | 15 | RDR2-sensitive |
| ATCACACGTTGTGGATTTGGCGCA  | 0    | 10 | RDR2-sensitive |
| ATCACACTGCAAGGCATGAACCGG  | 0    | 11 | RDR2-sensitive |
| ATCACCCGCGGTAAGTACGGATA   | 0    | 16 | RDR2-sensitive |
| ATCACCGTCTACTCTGCAACGGAC  | 0    | 12 | RDR2-sensitive |
| ATCACCTACAGGCTGTATGGACGG  | 0    | 14 | RDR2-sensitive |
| ATCACGACTGTATAGGATGGTATC  | 0    | 33 | RDR2-sensitive |
| ATCACGATTGCGGTATTCAAACCT  | 28   | 0  | RDR2-resistant |
| ATCACGCTGACTATAGATGGCCAA  | 0    | 10 | RDR2-sensitive |
| ATCACGGTGTGTCTCGGACGTGC   | 0    | 23 | RDR2-sensitive |
| ATCACGTAGGGACTGGCGTCAAG   | 0    | 17 | RDR2-sensitive |
| ATCACTCGTACTGACTGATCGGTG  | 0    | 22 | RDR2-sensitive |
| ATCACTGCGTGAGAACTTGCGGCG  | 0    | 9  | RDR2-sensitive |
| ATCACTGCGTTGAGAACCTGCGGC  | 0    | 39 | RDR2-sensitive |
| ATCACTGCTGTAGGATGACGGTTG  | 35   | 2  | RDR2-resistant |
| ATCACTGTAGTTGTTTTGGCGGCT  | 0    | 16 | RDR2-sensitive |
| ATCACTGTGAACTATCCGGCCTCA  | 0    | 18 | RDR2-sensitive |
| ATCACTGTGACGGCTGCTCTTGAC  | 0    | 13 | RDR2-sensitive |
| ATCACTTAGTATGATGGACCGGAG  | 0    | 9  | RDR2-sensitive |
| ATCACTTATTCTCGCGAACGGCAT  | 0    | 10 | RDR2-sensitive |
| ATCACTTGAACATGGTCGACGGCG  | 0    | 10 | RDR2-sensitive |
| ATCAGAATTTACAAGGACGTGCTT  | 53   | 0  | RDR2-resistant |
| ATCAGACGCGGACCGTCCGGCTTG  | 0    | 17 | RDR2-sensitive |
| ATCAGACTATAGGAAAGTTCCGGTT | 25   | 4  | RDR2-resistant |
| ATCAGATACGGACACACCGCGGAT  | 0    | 10 | RDR2-sensitive |
| ATCAGATCGATAGAACAGACGACA  | 2    | 21 | RDR2-sensitive |
| ATCAGATCGCAGGCGACAAGGCTT  | 0    | 22 | RDR2-sensitive |
| ATCAGATCGTCACGGCATGATCGT  | 0    | 10 | RDR2-sensitive |
| ATCAGATCTGGACTCTACGATCAA  | 0    | 11 | RDR2-sensitive |
| ATCAGCAAGGTCGGTAACCACAGG  | 0    | 9  | RDR2-sensitive |
| ATCAGCAGAGGACTGGTCACTGGC  | 0    | 29 | RDR2-sensitive |
| ATCAGCATCGTTCCGGTTCGACGTC | 2    | 19 | RDR2-sensitive |
| ATCAGCGAACTGGGAGGATGTCGG  | 0    | 9  | RDR2-sensitive |
| ATCAGGACGTAGGGTGTACGCAT   | 0    | 19 | RDR2-sensitive |
| ATCAGGACTCGACGGCAGCGCAAC  | 0    | 32 | RDR2-sensitive |
| ATCAGGCAAGACTAGGACAGGCGC  | 1    | 14 | RDR2-sensitive |
| ATCAGGCAGATCTCATAGGGACAG  | 1    | 23 | RDR2-sensitive |
| ATCAGGCCACTAGACGGGACTGTC  | 0    | 9  | RDR2-sensitive |
| ATCAGGCCGAGGACTGGGGGCATG  | 0    | 31 | RDR2-sensitive |

|                           |    |     |                |
|---------------------------|----|-----|----------------|
| ATCAGGCTACGTAGAGGGAGCGGC  | 0  | 12  | RDR2-sensitive |
| ATCAGGGCATGGCACTACATACAC  | 0  | 32  | RDR2-sensitive |
| ATCAGGTCGTAAAGCTCCATCGGC  | 23 | 2   | RDR2-resistant |
| ATCAGGTCTGGTGATTGTAAGGTA  | 53 | 0   | RDR2-resistant |
| ATCAGTCGGGTATCAGTCAGACGA  | 0  | 12  | RDR2-sensitive |
| ATCAGTGACGTGGACACGGTTAGC  | 34 | 0   | RDR2-resistant |
| ATCAGTTGGTATCAGAGCAAGGTT  | 0  | 9   | RDR2-sensitive |
| ATCAGTTTACTGTAGTGAAGGATT  | 0  | 9   | RDR2-sensitive |
| ATCATACTGATGTTTGTCTGTTCTG | 0  | 12  | RDR2-sensitive |
| ATCATAGAGTTGTCTTGGCGTCCG  | 0  | 13  | RDR2-sensitive |
| ATCATAGTGATATTTGTCTGTTCTG | 0  | 15  | RDR2-sensitive |
| ATCATATCGGACGTACCTGGTGGC  | 0  | 10  | RDR2-sensitive |
| ATCATATTTGTGAGGATCTTCGGA  | 0  | 20  | RDR2-sensitive |
| ATCATCATCATCTGATCTGCGGTA  | 32 | 4   | RDR2-resistant |
| ATCATCATGTCGTCGAGGCGAGCA  | 0  | 9   | RDR2-sensitive |
| ATCATCCGGGTTGTAGGTGACGTC  | 0  | 15  | RDR2-sensitive |
| ATCATCGGATAGTAGGTAGGTGGT  | 0  | 9   | RDR2-sensitive |
| ATCATCTCGTATGGACCAGGCTAA  | 1  | 16  | RDR2-sensitive |
| ATCATCTGTTTAGGTCTGTTGAGTA | 0  | 15  | RDR2-sensitive |
| ATCATCTTCTAAATATGTCGGACA  | 0  | 9   | RDR2-sensitive |
| ATCATGAGTTATCAGGTCGCCGTT  | 33 | 3   | RDR2-resistant |
| ATCATGCCCTGTGACTGTCGTCAA  | 0  | 10  | RDR2-sensitive |
| ATCATGTTTTTGGAGACCTTCGGA  | 15 | 34  | RDR2-sensitive |
| ATCATGTTTTTGGAGATCTTCGGA  | 1  | 14  | RDR2-sensitive |
| ATCATTAGACTGTCTTCAACGGAT  | 0  | 11  | RDR2-sensitive |
| ATCATTAGATCTAGATCGGATACA  | 0  | 23  | RDR2-sensitive |
| ATCATTAGATCTAGATCGGATGCA  | 2  | 113 | RDR2-sensitive |
| ATCATTAGATCTATATCGGATGCA  | 0  | 19  | RDR2-sensitive |
| ATCATTAGTGATTGTAGCGGCAAG  | 0  | 12  | RDR2-sensitive |
| ATCATTATTGTAGGACACGTCATG  | 0  | 22  | RDR2-sensitive |
| ATCATCAATCAACTGTGGGGCAT   | 49 | 5   | RDR2-resistant |
| ATCATTCGTTGGGTACATTTTAGT  | 30 | 0   | RDR2-resistant |
| ATCATTGTCGTTTCTGTTCCGGCTT | 0  | 12  | RDR2-sensitive |
| ATCATTGTTGGATCAAAGGGCATC  | 25 | 0   | RDR2-resistant |
| ATCATTTCTATCCTTCGTCGGCCA  | 1  | 43  | RDR2-sensitive |
| ATCATTTGGTTTGAATCGCGGAAC  | 0  | 11  | RDR2-sensitive |
| ATCATTTGGTTTGAATCGCGGAAT  | 0  | 9   | RDR2-sensitive |
| ATCATTTTTGTAGAGCTAAACGGT  | 0  | 9   | RDR2-sensitive |
| ATCCAAAAGGCTCTAGACGACGT   | 0  | 11  | RDR2-sensitive |
| ATCCAAACTGAGAACCGTCGTCGT  | 0  | 10  | RDR2-sensitive |
| ATCCAAGACTGTCTAGCGTGGTTG  | 28 | 0   | RDR2-resistant |
| ATCCAATCTCGGAGGAATGGGCAC  | 0  | 13  | RDR2-sensitive |
| ATCCACATGATTGGTTGCTCGGAT  | 0  | 41  | RDR2-sensitive |
| ATCCACCGGTCTGCTAGAAGGCG   | 0  | 12  | RDR2-sensitive |
| ATCCACGACCTAGAACCGGACGGT  | 0  | 11  | RDR2-sensitive |
| ATCCACGGTTCGGACCGTCCGGCT  | 0  | 10  | RDR2-sensitive |
| ATCCACGTGATTGGTTGCTCGGAT  | 0  | 18  | RDR2-sensitive |
| ATCCACTGCGAGAACATGGCGGGC  | 1  | 18  | RDR2-sensitive |
| ATCCACTGTATGGCTTCGGCGGCA  | 62 | 1   | RDR2-resistant |

|                           |    |    |                |
|---------------------------|----|----|----------------|
| ATCCAGAACTCTGCAGGTAGAGCT  | 0  | 11 | RDR2-sensitive |
| ATCCAGACTGGGATGACGCTGGAT  | 0  | 35 | RDR2-sensitive |
| ATCCAGATTGTAGATGCATGTCTGA | 0  | 9  | RDR2-sensitive |
| ATCCAGCAGATTGTGGACGCGGAT  | 0  | 14 | RDR2-sensitive |
| ATCCAGCCGGACTGCTACGCGCGA  | 0  | 14 | RDR2-sensitive |
| ATCCAGGGCTGCTGTGAAGACGAT  | 0  | 15 | RDR2-sensitive |
| ATCCATAGTTGAACTGATGTGGTT  | 14 | 0  | RDR2-resistant |
| ATCCATATCCTAATCCGTCGGGTC  | 0  | 63 | RDR2-sensitive |
| ATCCATATCCTGATCCGTCGGTTC  | 0  | 10 | RDR2-sensitive |
| ATCCATATCCTTATCCGTCGGGTC  | 1  | 37 | RDR2-sensitive |
| ATCCATCCCGTCAGCAGTAGAGGC  | 0  | 11 | RDR2-sensitive |
| ATCCATCGGGTATTAGGTCGCGGG  | 0  | 28 | RDR2-sensitive |
| ATCCATGTCGGATTCCATGGCGCC  | 0  | 22 | RDR2-sensitive |
| ATCCATGTGGATTGAGTGGGATTG  | 1  | 12 | RDR2-sensitive |
| ATCCATTCCGGACCGGCTGATTCC  | 0  | 21 | RDR2-sensitive |
| ATCCATTCTTGATTCCGTCACTGT  | 38 | 2  | RDR2-resistant |
| ATCCATTTGGCTGGTCTGTTGGAC  | 1  | 33 | RDR2-sensitive |
| ATCCATTTTGAGTTTGTCTGACG   | 0  | 18 | RDR2-sensitive |
| ATCCCAAGAATCGGGCGAAGACGA  | 0  | 23 | RDR2-sensitive |
| ATCCCAAGAATCGGGTGAAGACGA  | 0  | 28 | RDR2-sensitive |
| ATCCCAAGAGTCGGGTGAAGACGA  | 0  | 9  | RDR2-sensitive |
| ATCCCAAGAGTCGGGTGAAGACGG  | 2  | 26 | RDR2-sensitive |
| ATCCCAAGGATCGGATGAAGACGA  | 0  | 29 | RDR2-sensitive |
| ATCCCAAGATTGTCGTCCTAGGCAC | 1  | 18 | RDR2-sensitive |
| ATCCCAAGTTGTAGACCGTTCGGC  | 0  | 33 | RDR2-sensitive |
| ATCCCGGATCCACTAGAAGACGA   | 0  | 49 | RDR2-sensitive |
| ATCCCGGACGTTAGGCAAAAATAA  | 0  | 9  | RDR2-sensitive |
| ATCCCGGTGTGGAACGGTTTCTAA  | 0  | 9  | RDR2-sensitive |
| ATCCCGTTCCGGACAAGAGAAGAC  | 0  | 16 | RDR2-sensitive |
| ATCCCGTATCGGACTCGTTCGGTG  | 0  | 9  | RDR2-sensitive |
| ATCCCGTCAGCAGTAGAGGCGCAA  | 0  | 9  | RDR2-sensitive |
| ATCCCTCTGAATCGGACGGACAAT  | 0  | 9  | RDR2-sensitive |
| ATCCCTGGACTTTTTTCTTGGCA   | 22 | 0  | RDR2-resistant |
| ATCCCTGGCCGGCAGAACACGATC  | 0  | 9  | RDR2-sensitive |
| ATCCCTGGGCACGCGTCGGCACGC  | 0  | 40 | RDR2-sensitive |
| ATCCCTGTAGAGTACGGAAATAAC  | 0  | 10 | RDR2-sensitive |
| ATCCCTTACGGCCACAGTAGACGG  | 0  | 10 | RDR2-sensitive |
| ATCCGAACCGAGTTGACCATGAAC  | 0  | 9  | RDR2-sensitive |
| ATCCGAACGAGATGACTTGAGCTA  | 19 | 0  | RDR2-resistant |
| ATCCGAAGCTGTAGTATCCGGGGC  | 1  | 12 | RDR2-sensitive |
| ATCCGACACAAACGAACAAGGCCT  | 0  | 11 | RDR2-sensitive |
| ATCCGACCCGATAGAACCCGCGGA  | 0  | 18 | RDR2-sensitive |
| ATCCGACGAGTAGAAACCGGTCAC  | 0  | 10 | RDR2-sensitive |
| ATCCGACGGAACGAACAAGGCCT   | 1  | 22 | RDR2-sensitive |
| ATCCGACTGCGGCTGCGGCTTCTA  | 3  | 84 | RDR2-sensitive |
| ATCCGAGATTTGTTGAGAGAGCAT  | 0  | 26 | RDR2-sensitive |
| ATCCGAGGTGTAGAAAGGGTCAAC  | 18 | 0  | RDR2-resistant |
| ATCCGAGTCGCTGTATGGTTGGTG  | 0  | 15 | RDR2-sensitive |
| ATCCGATTGGTCAGGACGACGTCA  | 0  | 36 | RDR2-sensitive |



|                           |    |    |                |
|---------------------------|----|----|----------------|
| ATCCGATTTCTCGGGATCGTTCGA  | 0  | 76 | RDR2-sensitive |
| ATCCGCAGCTCTGAGCCAGACGGT  | 0  | 12 | RDR2-sensitive |
| ATCCGCGATCTAGGGACGGACGGT  | 0  | 23 | RDR2-sensitive |
| ATCCGCGCCTAGGGCTTGGACGGT  | 0  | 12 | RDR2-sensitive |
| ATCCGCGGATACGGTTATGGATAT  | 0  | 14 | RDR2-sensitive |
| ATCCGCGGTCGCTGTTACGGTAGT  | 0  | 11 | RDR2-sensitive |
| ATCCGCGTCGTAGAGTTGCTCGGC  | 0  | 19 | RDR2-sensitive |
| ATCCGGACAGGAACTAAGCACGG   | 0  | 10 | RDR2-sensitive |
| ATCCGGACGACGTGCATCTGGGAT  | 0  | 9  | RDR2-sensitive |
| ATCCGGACGGGTAAGAAACGGATA  | 2  | 43 | RDR2-sensitive |
| ATCCGGATCAGATTCAGATGGGGG  | 57 | 1  | RDR2-resistant |
| ATCCGGATCAGGCTGAGCTCGGGC  | 0  | 10 | RDR2-sensitive |
| ATCCGGATTGGGTATTGGCCATGC  | 17 | 0  | RDR2-resistant |
| ATCCGGCACAAACGAACAAGGCCT  | 0  | 11 | RDR2-sensitive |
| ATCCGGCAGAAACGAACAAGGCCT  | 0  | 20 | RDR2-sensitive |
| ATCCGGGACGTGGACGGCTACAAT  | 0  | 15 | RDR2-sensitive |
| ATCCGGGCGGGTAAGAAACGGATA  | 0  | 9  | RDR2-sensitive |
| ATCCGGGCTGTGAGAGGAGGGGAA  | 0  | 9  | RDR2-sensitive |
| ATCCGGGTTGTAGGTGACGTCCGA  | 1  | 78 | RDR2-sensitive |
| ATCCGGTCGTTTTGGTGGAGCCGA  | 2  | 15 | RDR2-sensitive |
| ATCCGGTCTGTGGATAGAGGAGAC  | 0  | 10 | RDR2-sensitive |
| ATCCGGTGCGACGTAGAGAAGACG  | 0  | 18 | RDR2-sensitive |
| ATCCGGTTAGGAATCGTTCGGATA  | 0  | 9  | RDR2-sensitive |
| ATCCGTATCCCGGAGGCGTAGGAA  | 0  | 9  | RDR2-sensitive |
| ATCCGTATCCCGGAGGCGTAGGAG  | 14 | 37 | RDR2-sensitive |
| ATCCGTCATTGGTGGAGGATTCGG  | 1  | 29 | RDR2-sensitive |
| ATCCGTCGACGGCTGGCACAGGCT  | 0  | 15 | RDR2-sensitive |
| ATCCGTCTGATTGGTTGCATGTAT  | 0  | 9  | RDR2-sensitive |
| ATCCGTCTGGGGTGGTATGTTCGAC | 0  | 10 | RDR2-sensitive |
| ATCCGTCTTGTGTGGTCTGTTCGAC | 0  | 13 | RDR2-sensitive |
| ATCCGTGTCGGGCCTAGCCGTGCT  | 0  | 11 | RDR2-sensitive |
| ATCCGTGTCTAGGGCTTGGACGGT  | 0  | 11 | RDR2-sensitive |
| ATCCGTTGGAATTGGATGGCCGAG  | 0  | 12 | RDR2-sensitive |
| ATCCGTTGGACATGGCATGGCCTG  | 15 | 0  | RDR2-resistant |
| ATCCTAATCCGTCCGGTCCGATAT  | 0  | 10 | RDR2-sensitive |
| ATCCTACCTGTAGGCTCACGGCAT  | 0  | 14 | RDR2-sensitive |
| ATCCTACGTCGTGAAGATCGGGCA  | 0  | 36 | RDR2-sensitive |
| ATCCTCAGTTGACGCCGTAGTTTC  | 0  | 9  | RDR2-sensitive |
| ATCCTCATTTACTCGTCGGGGAAA  | 0  | 11 | RDR2-sensitive |
| ATCCTCCGGATCGGATCTTGGCAA  | 0  | 49 | RDR2-sensitive |
| ATCCTCCGGTTGGATCGTTGGAGA  | 0  | 30 | RDR2-sensitive |
| ATCCTCGACTCGGAGCTGGATGGT  | 0  | 10 | RDR2-sensitive |
| ATCCTCGATTCAGGCTGCCGGTTA  | 0  | 17 | RDR2-sensitive |
| ATCCTCGCGGACCGTCTGGGGTGC  | 0  | 9  | RDR2-sensitive |
| ATCCTCGGCAGAACCGTGCACCAA  | 0  | 9  | RDR2-sensitive |
| ATCCTCGGTAAAGTTGTCGGTAC   | 0  | 15 | RDR2-sensitive |
| ATCCTCGGTATGAACGGAAGGTGT  | 0  | 16 | RDR2-sensitive |
| ATCCTCTTGGGATTCTTTTGTCCG  | 0  | 10 | RDR2-sensitive |
| ATCCTGAGCGCGCTGTCCGGCGGC  | 0  | 10 | RDR2-sensitive |

|                            |     |    |                |
|----------------------------|-----|----|----------------|
| ATCCTGGGCTGGCATCTCGACGGG   | 0   | 15 | RDR2-sensitive |
| ATCCTGGGTCGTCGTTTGGCCATA   | 0   | 11 | RDR2-sensitive |
| ATCCTGTACGACGGCTGTCTCAGC   | 0   | 10 | RDR2-sensitive |
| ATCCTGTACGCAAAGGACGTCCGGT  | 0   | 11 | RDR2-sensitive |
| ATCCTGTAGGCAAAGGACGCCGGT   | 0   | 17 | RDR2-sensitive |
| ATCCTTAAGACGGTAGTGTAGACC   | 0   | 9  | RDR2-sensitive |
| ATCCTTAAGGACTGATTTGGTGAC   | 0   | 9  | RDR2-sensitive |
| ATCCTTACAGTGAGGTTGTCCGGT   | 0   | 11 | RDR2-sensitive |
| ATCCTTACTAGATACGTCCGGATA   | 0   | 14 | RDR2-sensitive |
| ATCCTTGCCTTCTGTCGTCGGGCG   | 1   | 22 | RDR2-sensitive |
| ATCCTTGAAGGCTGTAGTAGGGC    | 0   | 56 | RDR2-sensitive |
| ATCCTTTTGGATTGTTGGTTCGTG   | 49  | 1  | RDR2-resistant |
| ATCGAACAGGTAGAGATTGTTGTC   | 0   | 11 | RDR2-sensitive |
| ATCGAACCCAGGACTTGGAGGTGC   | 0   | 12 | RDR2-sensitive |
| ATCGAACCTCTGCCTTAGACTGGG   | 0   | 27 | RDR2-sensitive |
| ATCGAACTGGGACTAGAGGACGAC   | 0   | 20 | RDR2-sensitive |
| ATCGAACTGTGACCGATTCGGTAG   | 0   | 17 | RDR2-sensitive |
| ATCGAATATTTTGTAGACCGTCGC   | 0   | 10 | RDR2-sensitive |
| ATCGAATCTAGAACACTTGGCGCG   | 0   | 17 | RDR2-sensitive |
| ATCGAATTTGTACGGCTACATCGA   | 1   | 12 | RDR2-sensitive |
| ATCGACACAAGGCTGTATCGGCAC   | 0   | 10 | RDR2-sensitive |
| ATCGACAGAGAGCACGACCGACGC   | 0   | 37 | RDR2-sensitive |
| ATCGACAGCGGATGCACAAACCAT   | 1   | 18 | RDR2-sensitive |
| ATCGACCGAGGCGGCATCTGACAG   | 0   | 13 | RDR2-sensitive |
| ATCGACGACTGACAATATGGCTGC   | 0   | 11 | RDR2-sensitive |
| ATCGACGACTGGCACA AAAAGGCAC | 2   | 71 | RDR2-sensitive |
| ATCGACGACTTGTACAAAAGGCAT   | 0   | 10 | RDR2-sensitive |
| ATCGACGTAGAGCCGAAGAGAAGC   | 0   | 15 | RDR2-sensitive |
| ATCGACGTAGAGCCGAAGAGAGAC   | 0   | 15 | RDR2-sensitive |
| ATCGACGTCTGTCAAGATCTACGG   | 0   | 10 | RDR2-sensitive |
| ATCGACTATGTACGGCTACATCGA   | 2   | 24 | RDR2-sensitive |
| ATCGACTCGTGTAGGCAACCAAAC   | 0   | 17 | RDR2-sensitive |
| ATCGACTGAGACCCCATCGGCCTG   | 0   | 11 | RDR2-sensitive |
| ATCGACTGCATACGACTACATGGA   | 0   | 11 | RDR2-sensitive |
| ATCGACTGCGTACGACTACATCGA   | 2   | 62 | RDR2-sensitive |
| ATCGACTGCTCCATCGTCCGGCTG   | 0   | 9  | RDR2-sensitive |
| ATCGACTGCTTGCGCTACCGGCAT   | 0   | 23 | RDR2-sensitive |
| ATCGACTGTAGCTCGATGGTTCGT   | 3   | 38 | RDR2-sensitive |
| ATCGACTGTCCGGAATACCGTAGA   | 0   | 31 | RDR2-sensitive |
| ATCGACTGTGTCACCGTGAAGGCG   | 0   | 20 | RDR2-sensitive |
| ATCGACTTCGTACGGCTACATCGA   | 3   | 16 | RDR2-sensitive |
| ATCGACTTGATGTGCTTCGTTTGG   | 231 | 6  | RDR2-resistant |
| ATCGAGAAGCTAGAGCCGGAGTCC   | 0   | 9  | RDR2-sensitive |
| ATCGAGACGGGGTGACCGAACGAC   | 0   | 40 | RDR2-sensitive |
| ATCGAGAGTAGGACATTCCGGCATA  | 1   | 47 | RDR2-sensitive |
| ATCGAGCATGCCGACTTAGACGGT   | 0   | 11 | RDR2-sensitive |
| ATCGAGCCC GCGGACTTAGACGGT  | 0   | 17 | RDR2-sensitive |
| ATCGAGCCTGTAGACTTAGACGGT   | 0   | 10 | RDR2-sensitive |
| ATCGAGCGATGACATTTATTCTGA   | 16  | 0  | RDR2-resistant |

|                           |    |    |                |
|---------------------------|----|----|----------------|
| ATCGAGCTGGTGGATCAGGCCATG  | 49 | 0  | RDR2-resistant |
| ATCGAGGTGTCGTAGACGGTCCGC  | 3  | 17 | RDR2-sensitive |
| ATCGAGGTTCCGATGCAGGATCGG  | 0  | 13 | RDR2-sensitive |
| ATCGAGTTGCGATTGTCGGCGCCT  | 0  | 30 | RDR2-sensitive |
| ATCGATATCACGTCAGAGCTCGGC  | 1  | 36 | RDR2-sensitive |
| ATCGATATCAGGACTCGACGGCAG  | 0  | 51 | RDR2-sensitive |
| ATCGATATCGGGACTCGACGGCAG  | 2  | 24 | RDR2-sensitive |
| ATCGATCAGACGACCTCAGACGGT  | 0  | 10 | RDR2-sensitive |
| ATCGATCCGATGCTGTACAGACGC  | 0  | 14 | RDR2-sensitive |
| ATCGATCGCGCGCGAGTGAGGCAT  | 0  | 13 | RDR2-sensitive |
| ATCGATCGGTCACGGCAAGAAGGT  | 0  | 11 | RDR2-sensitive |
| ATCGATCTGGCATTCTTTAGACGC  | 0  | 9  | RDR2-sensitive |
| ATCGATCTGGTTGGGCTTGGTCGG  | 0  | 9  | RDR2-sensitive |
| ATCGATGACTACATGTAGGGACGT  | 0  | 13 | RDR2-sensitive |
| ATCGATGATCGTATGGTTTCGGAT  | 0  | 12 | RDR2-sensitive |
| ATCGATGCCTGGATGTAGAGACGT  | 0  | 9  | RDR2-sensitive |
| ATCGATGCTTGAACATGGATGGT   | 0  | 26 | RDR2-sensitive |
| ATCGATGGACAGGAACGTCGGCCA  | 0  | 9  | RDR2-sensitive |
| ATCGATGGACAGGAATGTCGGCCC  | 0  | 9  | RDR2-sensitive |
| ATCGATGGACGGCAGAACGGCAGA  | 0  | 26 | RDR2-sensitive |
| ATCGATGGGCAGGAACGTCGGCCG  | 1  | 13 | RDR2-sensitive |
| ATCGATGTACTGTGTGGCGAGCTC  | 0  | 12 | RDR2-sensitive |
| ATCGATGTGTAGTGTGATGGTCTG  | 31 | 1  | RDR2-resistant |
| ATCGATTCCGGTCTTGTGTCGGCTC | 0  | 11 | RDR2-sensitive |
| ATCGATTCTGTACTGTAGCAGGTT  | 0  | 15 | RDR2-sensitive |
| ATCGATTGTTAGCAGTATGTTGAT  | 77 | 7  | RDR2-resistant |
| ATCGCAACTCTGGGCGACGTGCG   | 0  | 9  | RDR2-sensitive |
| ATCGCAATCGGACGGTGGAGATGG  | 0  | 9  | RDR2-sensitive |
| ATCGCAATCGGACGGTGGGGATGG  | 1  | 52 | RDR2-sensitive |
| ATCGCACGAGACAGGCTAGCACGG  | 0  | 17 | RDR2-sensitive |
| ATCGCAGAAGGCCAGGTAGAGCGG  | 0  | 21 | RDR2-sensitive |
| ATCGCAGGACTGACCGGCTGCATG  | 74 | 0  | RDR2-resistant |
| ATCGCATCAGACGGTGGAGAGCAA  | 0  | 11 | RDR2-sensitive |
| ATCGCATCTGTTTCGTCGGTCGCG  | 0  | 21 | RDR2-sensitive |
| ATCGCATGGGCTCGACGTCGGCGT  | 0  | 9  | RDR2-sensitive |
| ATCGCCATCGTAGATCGTCCGGAG  | 2  | 36 | RDR2-sensitive |
| ATCGCCCCTGGACGGTCGCGGACC  | 45 | 3  | RDR2-resistant |
| ATCGCGACGATAAACTACGGATG   | 0  | 10 | RDR2-sensitive |
| ATCGCGCGACGTGAGACCACGGTT  | 0  | 15 | RDR2-sensitive |
| ATCGCGCGATGGCAGAACAGGGCG  | 0  | 14 | RDR2-sensitive |
| ATCGCGCGGAAGGCCAGGTAGAGC  | 1  | 20 | RDR2-sensitive |
| ATCGCGCTGTTGGCTACGTCTTCA  | 5  | 77 | RDR2-sensitive |
| ATCGCGGTGGGACTCACGGCGAAC  | 0  | 15 | RDR2-sensitive |
| ATCGCGTAGGACAGTTCGGCAAGG  | 0  | 13 | RDR2-sensitive |
| ATCGCGTAGGACAGTTCGGCGAGG  | 0  | 16 | RDR2-sensitive |
| ATCGCGTAGGACAGTTCGGCTAGA  | 0  | 22 | RDR2-sensitive |
| ATCGCGTAGGACAGTTCGGCTAGG  | 0  | 41 | RDR2-sensitive |
| ATCGCTAGCTGAAGTAGGACGAGC  | 0  | 27 | RDR2-sensitive |
| ATCGCTAGGGACTCAGAGAGAGGG  | 0  | 10 | RDR2-sensitive |

|                           |    |     |                |
|---------------------------|----|-----|----------------|
| ATCGCTCAACGGCAGAACAGATGG  | 0  | 17  | RDR2-sensitive |
| ATCGCTCGCTCGGAGGACGCGCAC  | 0  | 9   | RDR2-sensitive |
| ATCGCTCTGAAGGGCCTGAAGGCG  | 0  | 9   | RDR2-sensitive |
| ATCGCTGCCCTTGAGTGCCAGCTC  | 24 | 0   | RDR2-resistant |
| ATCGCTTCGTCGGGGGCTTGCAAG  | 0  | 9   | RDR2-sensitive |
| ATCGCTTGATTGCATGCTTGCACC  | 0  | 12  | RDR2-sensitive |
| ATCGCTTGGTCGTGCGTGCAT     | 4  | 29  | RDR2-sensitive |
| ATCGCTTTGTCTAGATTGTCTAAA  | 24 | 0   | RDR2-resistant |
| ATCGGAAAAGACGGGACACCACAC  | 0  | 15  | RDR2-sensitive |
| ATCGGAAACAAAATCGAAAACGGT  | 0  | 12  | RDR2-sensitive |
| ATCGGAACTGAGCGAGGATGAGTC  | 1  | 14  | RDR2-sensitive |
| ATCGGAATGCAGCGGAGGAATGTT  | 21 | 0   | RDR2-resistant |
| ATCGGACACACGGCAGAGATGCTG  | 0  | 10  | RDR2-sensitive |
| ATCGGACACTCTAAGGGCATGTTC  | 0  | 9   | RDR2-sensitive |
| ATCGGACAGCGACCAGCACGACAG  | 0  | 35  | RDR2-sensitive |
| ATCGGACCATGCCGGCACGGACCC  | 0  | 15  | RDR2-sensitive |
| ATCGGACCGTGCCGGCCCAGCACT  | 0  | 11  | RDR2-sensitive |
| ATCGGACCTTGCGATACAGTCGA   | 0  | 12  | RDR2-sensitive |
| ATCGGACGTGAGCTGTAGACGGAT  | 0  | 19  | RDR2-sensitive |
| ATCGGACTGTCCGGTGTGCACTGT  | 3  | 16  | RDR2-sensitive |
| ATCGGACTTTTTTCAATTGGTTG   | 14 | 0   | RDR2-resistant |
| ATCGGAGCTGTTAGTTGGCCGCA   | 0  | 15  | RDR2-sensitive |
| ATCGGAGGAGGGTTATTTGATAAA  | 14 | 0   | RDR2-resistant |
| ATCGGATACGCATGGAAACGGATT  | 0  | 10  | RDR2-sensitive |
| ATCGGATAGTAGGTAGGTGGTCGT  | 0  | 17  | RDR2-sensitive |
| ATCGGATATCGGATACTTGTGCGA  | 0  | 9   | RDR2-sensitive |
| ATCGGATCCCAACGCAAGTAGCAT  | 0  | 9   | RDR2-sensitive |
| ATCGGATCCCGAGGGCACGCACGC  | 0  | 12  | RDR2-sensitive |
| ATCGGATCCGATCTGACGGACCAG  | 0  | 10  | RDR2-sensitive |
| ATCGGATCCTCGTATACCCGACGG  | 0  | 10  | RDR2-sensitive |
| ATCGGATCGAATACAGACGGATAT  | 0  | 27  | RDR2-sensitive |
| ATCGGATCGAATACGGACGGATAT  | 1  | 113 | RDR2-sensitive |
| ATCGGATCGGATACGGACGGATAT  | 0  | 14  | RDR2-sensitive |
| ATCGGATCGGGCTGGCCCAGGCAC  | 0  | 18  | RDR2-sensitive |
| ATCGGATCGTGATCACACGGCTGG  | 0  | 12  | RDR2-sensitive |
| ATCGGATCGTGGATGTTTATCGGT  | 0  | 10  | RDR2-sensitive |
| ATCGGATGCGAACGAGCGAGGACA  | 0  | 23  | RDR2-sensitive |
| ATCGGATTCATCGGTAACGGTATT  | 0  | 13  | RDR2-sensitive |
| ATCGGATTGCGACGCATTTACGGC  | 0  | 15  | RDR2-sensitive |
| ATCGGATTGTGCCGGTATGACACT  | 1  | 81  | RDR2-sensitive |
| ATCGGATTTCTATATATGCAGATG  | 17 | 0   | RDR2-resistant |
| ATCGGATTTGTGCCGGTAGTTCTT  | 0  | 14  | RDR2-sensitive |
| ATCGGCAAGCTGTTCGACGACTTC  | 0  | 9   | RDR2-sensitive |
| ATCGGCAATACAGTGAACGGCGC   | 0  | 9   | RDR2-sensitive |
| ATCGGCATGTACTTAGGGCACTAG  | 0  | 9   | RDR2-sensitive |
| ATCGGCATGTACTTAGGGCGCTAG  | 0  | 66  | RDR2-sensitive |
| ATCGGCATTGGTAGTTTGGTGGCT  | 0  | 21  | RDR2-sensitive |
| ATCGGCATTGTACCGGCAGATCCG  | 1  | 17  | RDR2-sensitive |
| ATCGGCCAGGCAGAACGGGTTCCCT | 0  | 37  | RDR2-sensitive |

|                           |    |     |                |
|---------------------------|----|-----|----------------|
| ATCGGCCCGCTAGACACGGCTCAT  | 0  | 23  | RDR2-sensitive |
| ATCGGCCGACTAGACAGACGCATG  | 0  | 10  | RDR2-sensitive |
| ATCGGCTAGACGATAGGCTGACGG  | 0  | 11  | RDR2-sensitive |
| ATCGGCTATCTTGTTCTCACGGCT  | 1  | 41  | RDR2-sensitive |
| ATCGGCTCCGGCAGAAAAGCTGCT  | 0  | 132 | RDR2-sensitive |
| ATCGGCTCCGGCAGAGAAGCTGCT  | 0  | 22  | RDR2-sensitive |
| ATCGGCTCCTGAACGAGGCTGCAG  | 0  | 11  | RDR2-sensitive |
| ATCGGCTCGGCTCGCTACGAAAAC  | 0  | 9   | RDR2-sensitive |
| ATCGGCTCTAGCAGAGAAGCTGCT  | 1  | 26  | RDR2-sensitive |
| ATCGGCTCTGTTTGTAGAAGTCGT  | 0  | 13  | RDR2-sensitive |
| ATCGGCTGACTCCGACCAGGTCGA  | 55 | 10  | RDR2-resistant |
| ATCGGCTGCCGCAGATTTTCGCCAT | 0  | 9   | RDR2-sensitive |
| ATCGGCTGCGAGATTAGCGGTGTG  | 0  | 15  | RDR2-sensitive |
| ATCGGCTGCGGCTGGACCTTGCAG  | 0  | 9   | RDR2-sensitive |
| ATCGGCTGGACAGGGAAGAAGAGC  | 2  | 30  | RDR2-sensitive |
| ATCGGCTGGGAAGCATGCCTTGTG  | 0  | 15  | RDR2-sensitive |
| ATCGGCTTGGCAGATGAGAGACGA  | 0  | 19  | RDR2-sensitive |
| ATCGGCTTTGACTGAGCGGACGGT  | 0  | 23  | RDR2-sensitive |
| ATCGGGACGGATACAGGACGGGAC  | 0  | 14  | RDR2-sensitive |
| ATCGGGACTCGACGACAGCGCAAC  | 0  | 17  | RDR2-sensitive |
| ATCGGGACTCGACGGCAGCACAAAC | 0  | 11  | RDR2-sensitive |
| ATCGGGACTCGACGGCAGCGCAAC  | 0  | 13  | RDR2-sensitive |
| ATCGGGACTCGACGGCGAACGGCG  | 0  | 9   | RDR2-sensitive |
| ATCGGGCAACCCGGACGGATTCAC  | 0  | 37  | RDR2-sensitive |
| ATCGGGCACCTAAGCAGGAACACG  | 0  | 24  | RDR2-sensitive |
| ATCGGGCACTCAGCGAAGACGTCT  | 0  | 9   | RDR2-sensitive |
| ATCGGGCAGGAATGGGCAGACCAA  | 0  | 9   | RDR2-sensitive |
| ATCGGGCAGGAGTAGTGGGCAGGC  | 0  | 9   | RDR2-sensitive |
| ATCGGGCATCGTGACGCATCATCT  | 0  | 11  | RDR2-sensitive |
| ATCGGGCATGCAGGATGGTCCCAG  | 0  | 9   | RDR2-sensitive |
| ATCGGGCCAACAACGAGTCAGCGG  | 0  | 9   | RDR2-sensitive |
| ATCGGGCCCACATGCGCGGACGGT  | 0  | 11  | RDR2-sensitive |
| ATCGGGCCGAAACCATAAGCACGG  | 0  | 20  | RDR2-sensitive |
| ATCGGGCCGAAATCATAAGCACGG  | 0  | 11  | RDR2-sensitive |
| ATCGGGCCGACTCGCCAGACACGG  | 0  | 11  | RDR2-sensitive |
| ATCGGGCGGGTAGTACACGGATAT  | 0  | 23  | RDR2-sensitive |
| ATCGGGCTAAACGGCGTAACTTTT  | 0  | 10  | RDR2-sensitive |
| ATCGGGCTGATTGGATGGGCGGAC  | 0  | 10  | RDR2-sensitive |
| ATCGGGCTGGGACCAGAGGATGAT  | 0  | 13  | RDR2-sensitive |
| ATCGGGCTGTGCTGTCCAACGGAT  | 0  | 21  | RDR2-sensitive |
| ATCGGGCTTACTGGACAGGCCGAC  | 0  | 9   | RDR2-sensitive |
| ATCGGGCTTGCAGGACGGGTCGGC  | 0  | 9   | RDR2-sensitive |
| ATCGGGTACGGTGGGCGTGGGTAT  | 1  | 15  | RDR2-sensitive |
| ATCGGGTACGTCATACGCTGGAAC  | 1  | 24  | RDR2-sensitive |
| ATCGGGTCCTGTTTTATAGACGTC  | 0  | 12  | RDR2-sensitive |
| ATCGGGTGAAGACGAAGCTAGCAG  | 2  | 83  | RDR2-sensitive |
| ATCGGGTGAAGACGGAGCCAGCAA  | 0  | 38  | RDR2-sensitive |
| ATCGGGTGTTCTGACCACCGGTAT  | 14 | 0   | RDR2-resistant |
| ATCGGTACGACATGTAACAGGCTC  | 0  | 9   | RDR2-sensitive |

|                          |     |    |                |
|--------------------------|-----|----|----------------|
| ATCGGTACGACTCATGACGGGCTC | 0   | 52 | RDR2-sensitive |
| ATCGGTACTCTAGATCACGTCATA | 0   | 13 | RDR2-sensitive |
| ATCGGTATGGCTTGTAGATCGGAT | 0   | 9  | RDR2-sensitive |
| ATCGGTATGGTAGAGAGTCGGTGC | 0   | 9  | RDR2-sensitive |
| ATCGGTATGGTAGAGAGTCGGTGG | 0   | 10 | RDR2-sensitive |
| ATCGGTCCGGTCTGTGATAGGTTG | 0   | 10 | RDR2-sensitive |
| ATCGGTCGTGTATTTAGTCGGTCC | 0   | 18 | RDR2-sensitive |
| ATCGGTCTATGGTCTGACAGGCGT | 0   | 16 | RDR2-sensitive |
| ATCGGTCTCCATAGTGGACGCGTA | 0   | 10 | RDR2-sensitive |
| ATCGGTGCTCTGTCTGCGCGCGTC | 0   | 9  | RDR2-sensitive |
| ATCGGTGGGGAGTACGGCTCTAGT | 0   | 9  | RDR2-sensitive |
| ATCGGTGTCCGATCTGACGGCTGA | 0   | 19 | RDR2-sensitive |
| ATCGGTGTGATCTTTAGAACCGGC | 0   | 24 | RDR2-sensitive |
| ATCGGTTCCAGTCTCTGACCGAGC | 0   | 15 | RDR2-sensitive |
| ATCGGTTGTGTTGCTGCACGGCGC | 0   | 12 | RDR2-sensitive |
| ATCGGTTGTTGAGCAAGTCGGTAA | 0   | 9  | RDR2-sensitive |
| ATCGTAACTCGGATGTATGTTGGT | 75  | 2  | RDR2-resistant |
| ATCGTAATCGGATACTGTCCGGCT | 0   | 19 | RDR2-sensitive |
| ATCGTACATCTTCTGCATCCGGTT | 128 | 1  | RDR2-resistant |
| ATCGTACCGGGCTGTGCCGAGGCA | 0   | 57 | RDR2-sensitive |
| ATCGTAGACAGCCGTCGGAGATAA | 0   | 17 | RDR2-sensitive |
| ATCGTATGATCTCTGCTGCGAAGA | 0   | 27 | RDR2-sensitive |
| ATCGTATTAGAAACGTCGGTACCC | 1   | 52 | RDR2-sensitive |
| ATCGTCACGTCGTTCCGATGGCTG | 0   | 10 | RDR2-sensitive |
| ATCGTCACTCGTTGGAAGCGTCGT | 0   | 16 | RDR2-sensitive |
| ATCGTCAGATCGGATCGGTCAGTT | 0   | 11 | RDR2-sensitive |
| ATCGTCCTCGGGCAAGACGCGCTG | 0   | 10 | RDR2-sensitive |
| ATCGTCGACCCTGCTGATTCCGGC | 0   | 14 | RDR2-sensitive |
| ATCGTCTATTGTTGGAGGCAGCCT | 0   | 23 | RDR2-sensitive |
| ATCGTCTCTTTGGACACGTGGCAG | 0   | 9  | RDR2-sensitive |
| ATCGTGACCTACTGATATGGCTGA | 0   | 22 | RDR2-sensitive |
| ATCGTGATATCGGAGGAGGGTTAT | 18  | 0  | RDR2-resistant |
| ATCGTGATGGGTAGGATCAAGCAT | 0   | 10 | RDR2-sensitive |
| ATCGTGATTAGTCGGGCTAGTCGG | 0   | 12 | RDR2-sensitive |
| ATCGTGCCTATGGACTAAAATGGA | 0   | 16 | RDR2-sensitive |
| ATCGTGGGCCGGGCAAAGACTACA | 0   | 9  | RDR2-sensitive |
| ATCGTGACCGTAGGGAATGAGGC  | 0   | 22 | RDR2-sensitive |
| ATCGTGATCGTACTGTGCGTCGT  | 1   | 20 | RDR2-sensitive |
| ATCGTGTCGGACTAGCACGGTCC  | 0   | 10 | RDR2-sensitive |
| ATCGTGTCGGATTGATTCGCGGCT | 0   | 23 | RDR2-sensitive |
| ATCGTGTCGGGATAGCGGCTCAAG | 0   | 18 | RDR2-sensitive |
| ATCGTGTGATTCTAGTTCGTCGA  | 0   | 11 | RDR2-sensitive |
| ATCGTGTTAGTATGATCTGAAGAC | 1   | 25 | RDR2-sensitive |
| ATCGTTATATTTGTAGAGTGGCCC | 0   | 38 | RDR2-sensitive |
| ATCGTTCAGATCGTTGGATAAATC | 0   | 9  | RDR2-sensitive |
| ATCGTTCGTCGGGTGGCACGGCAC | 1   | 13 | RDR2-sensitive |
| ATCGTTCGTGCCGACGTAGAGGGC | 0   | 19 | RDR2-sensitive |
| ATCGTTCGTCTCGTCGGCGTGCA  | 0   | 9  | RDR2-sensitive |
| ATCGTTGGACAATGGTTATGTGAC | 50  | 8  | RDR2-resistant |

|                           |    |     |                |
|---------------------------|----|-----|----------------|
| ATCGTTTCGAGTCGGGGTCGTCAA  | 0  | 14  | RDR2-sensitive |
| ATCGTTTCTGTTCTGCACTGCGGT  | 0  | 10  | RDR2-sensitive |
| ATCGTTTGAGATGGTTTGGACATA  | 3  | 19  | RDR2-sensitive |
| ATCGTTTTAGTGGAGCGAGGGCAT  | 0  | 10  | RDR2-sensitive |
| ATCTAAACTCTGGAACAGAGCTGC  | 0  | 10  | RDR2-sensitive |
| ATCTAAACTCTGGAGCAGAGCTGC  | 3  | 119 | RDR2-sensitive |
| ATCTAAACTCTGGAGTAGAGCTGC  | 0  | 23  | RDR2-sensitive |
| ATCTAACTGTAGAAAGGTTTTGGA  | 0  | 9   | RDR2-sensitive |
| ATCTAAGTATATGGTGGCTTTATT  | 65 | 0   | RDR2-resistant |
| ATCTAATCCGGGCTGAACCGGCAT  | 0  | 10  | RDR2-sensitive |
| ATCTACGGAGGACACGACGAGCGC  | 0  | 12  | RDR2-sensitive |
| ATCTACTAACAATTAATCGTGGAC  | 0  | 9   | RDR2-sensitive |
| ATCTACTAACAATTACTCGTGGAC  | 32 | 354 | RDR2-sensitive |
| ATCTACTAACAATTACTCGTGGCC  | 4  | 44  | RDR2-sensitive |
| ATCTACTAACAATTCATCGCGGGC  | 0  | 10  | RDR2-sensitive |
| ATCTACTAATAATTACTCGTGGAC  | 3  | 24  | RDR2-sensitive |
| ATCTACTCCATTGCAGCTGAACGT  | 0  | 29  | RDR2-sensitive |
| ATCTACTGTAGGGCCACTAGGCAC  | 0  | 12  | RDR2-sensitive |
| ATCTACTTTCTGTTCGTGCGTTCA  | 0  | 9   | RDR2-sensitive |
| ATCTAGACTGCATGCATTGAGATG  | 0  | 21  | RDR2-sensitive |
| ATCTAGCGGCTGCCAGAGACGACT  | 0  | 11  | RDR2-sensitive |
| ATCTAGGACTCGGTGCATTGGCAG  | 14 | 0   | RDR2-resistant |
| ATCTAGGAGGAGAGAGAAGGGGAC  | 0  | 11  | RDR2-sensitive |
| ATCTAGGATCGTATGGTCGCGGGC  | 0  | 11  | RDR2-sensitive |
| ATCTAGGCTGTGAGAGTAGGGAGA  | 0  | 11  | RDR2-sensitive |
| ATCTAGTACTGTATAAAATCGGAG  | 0  | 13  | RDR2-sensitive |
| ATCTAGTCGTCTAGTATCGTGGTT  | 0  | 22  | RDR2-sensitive |
| ATCTAGTGAGCGGGGCTGAGGTAT  | 0  | 14  | RDR2-sensitive |
| ATCTATACAGTCGTGCGGAGGCTG  | 0  | 28  | RDR2-sensitive |
| ATCTATAGACTGCGGCTGCAACAG  | 0  | 11  | RDR2-sensitive |
| ATCTATAGTTATGGTCTGTCTCGA  | 0  | 12  | RDR2-sensitive |
| ATCTATATACCTTGCTGTGAGACA  | 56 | 3   | RDR2-resistant |
| ATCTATATCCGATTTCGTGAGTC   | 0  | 10  | RDR2-sensitive |
| ATCTATATCTAGCTCCGTGCGGGTC | 0  | 14  | RDR2-sensitive |
| ATCTATCACTTTTAAGACTGCATT  | 71 | 1   | RDR2-resistant |
| ATCTATCTCGGATCTCATGGCGAC  | 26 | 0   | RDR2-resistant |
| ATCTATGACCGTGGATATGACTGC  | 0  | 47  | RDR2-sensitive |
| ATCTATTTAGTTTGACTAGCGGCT  | 0  | 9   | RDR2-sensitive |
| ATCTATTTGATGTTGAATACGGTT  | 14 | 0   | RDR2-resistant |
| ATCTCACATGTGGGTCGTCCGGAT  | 0  | 14  | RDR2-sensitive |
| ATCTCACGGGATTGGAACAGGGCC  | 0  | 9   | RDR2-sensitive |
| ATCTCAGACCGAGGGATCGCGGCC  | 0  | 10  | RDR2-sensitive |
| ATCTCAGATGATGGTTCTAACAAT  | 1  | 20  | RDR2-sensitive |
| ATCTCAGCTGAAGGTACTAGAG    | 40 | 0   | RDR2-resistant |
| ATCTCAGTGGATCGTGGCAGCAAG  | 31 | 0   | RDR2-resistant |
| ATCTCCAACAGTTGGTCGGACT    | 0  | 10  | RDR2-sensitive |
| ATCTCCACGGATGAAAAGGGGACA  | 0  | 14  | RDR2-sensitive |
| ATCTCCACGGATGAAAAGGGGACG  | 0  | 14  | RDR2-sensitive |
| ATCTCCAGTAGAGATCGACTCGGA  | 0  | 10  | RDR2-sensitive |

|                           |     |     |                |
|---------------------------|-----|-----|----------------|
| ATCTCCATAAAGGGTGTTCGCGGAC | 0   | 14  | RDR2-sensitive |
| ATCTCCCGTCAGCAGTAGAGGCAC  | 1   | 55  | RDR2-sensitive |
| ATCTCCCGTCGGCTTCGTTATGGC  | 0   | 27  | RDR2-sensitive |
| ATCTCCGACGGATCTGTACGAGGC  | 0   | 48  | RDR2-sensitive |
| ATCTCCGACGGCACTCAGACTAGC  | 0   | 12  | RDR2-sensitive |
| ATCTCCGACGGCCTCGTACACAGC  | 0   | 13  | RDR2-sensitive |
| ATCTCCGACGGCCTCGTACAGAGC  | 2   | 17  | RDR2-sensitive |
| ATCTCCGACGGCCTCGTAGGGCGGC | 1   | 28  | RDR2-sensitive |
| ATCTCCGACGGCTAGAAGAGACGC  | 0   | 13  | RDR2-sensitive |
| ATCTCCGACGGCTCTGTACGAGGC  | 43  | 237 | RDR2-sensitive |
| ATCTCCGACGGCTCTGTATGAGGC  | 1   | 14  | RDR2-sensitive |
| ATCTCCGACGGCTCTGTGCGAGGC  | 0   | 12  | RDR2-sensitive |
| ATCTCCGACGGCTGTAATACGGGC  | 3   | 32  | RDR2-sensitive |
| ATCTCCGACGGCTGTGTACGAGGC  | 4   | 171 | RDR2-sensitive |
| ATCTCCGGACGGCTAAGCCACAC   | 0   | 31  | RDR2-sensitive |
| ATCTCCGGAGCCAGAATCCAACGG  | 0   | 9   | RDR2-sensitive |
| ATCTCCGTTGGACCAACGACTGCA  | 0   | 11  | RDR2-sensitive |
| ATCTCCTCGGCTGCATGCGCACAT  | 0   | 12  | RDR2-sensitive |
| ATCTCGAACCGGCGACGATGGCGT  | 3   | 23  | RDR2-sensitive |
| ATCTCGACGAAGTGTACATCGGTA  | 0   | 16  | RDR2-sensitive |
| ATCTCGACGTAAGTGTGACGGTGGG | 0   | 12  | RDR2-sensitive |
| ATCTCGATCGGATGACAAGAGAAG  | 0   | 12  | RDR2-sensitive |
| ATCTCGCGAGATTGGAACAGGGCC  | 0   | 37  | RDR2-sensitive |
| ATCTCGCGGATATGGATTGACGAA  | 0   | 33  | RDR2-sensitive |
| ATCTCGGACAAATAGCAGAGTTGT  | 0   | 11  | RDR2-sensitive |
| ATCTCGGACAAGCCATGATGCCAT  | 0   | 12  | RDR2-sensitive |
| ATCTCGGACAGCCGCGCAGTAGAC  | 0   | 12  | RDR2-sensitive |
| ATCTCGGACATACGATGGTGGCGT  | 0   | 80  | RDR2-sensitive |
| ATCTCGGACATGCGACGATGGCGT  | 0   | 15  | RDR2-sensitive |
| ATCTCGGACATGCGACGATGGTGT  | 1   | 14  | RDR2-sensitive |
| ATCTCGGACCAGGCTTCAATCCCT  | 103 | 1   | RDR2-resistant |
| ATCTCGGACCAGGCTTCAATCCCT  | 116 | 2   | RDR2-resistant |
| ATCTCGGACCAGGCTTCAATCCCT  | 35  | 1   | RDR2-resistant |
| ATCTCGGACCGGCGACGGTGGCAT  | 0   | 19  | RDR2-sensitive |
| ATCTCGGACTCGCGACGGTGTCTGT | 0   | 20  | RDR2-sensitive |
| ATCTCGGTGAACTGTACATTGGCA  | 0   | 31  | RDR2-sensitive |
| ATCTCGTTCGCGCGGCTTCGCCACT | 1   | 13  | RDR2-sensitive |
| ATCTCGTGACTCTGCGCGCACAGA  | 0   | 9   | RDR2-sensitive |
| ATCTCGTGGCACTCGGCAAAGAGC  | 0   | 12  | RDR2-sensitive |
| ATCTCGTTTCTGGGATCCCGTCGG  | 0   | 9   | RDR2-sensitive |
| ATCTCGTTTCTGTGGAGCCAGGCT  | 0   | 12  | RDR2-sensitive |
| ATCTCGTTTGGATGATTTTCGTGA  | 0   | 9   | RDR2-sensitive |
| ATCTCTAATTTTGTTCGGTTCGGAT | 0   | 14  | RDR2-sensitive |
| ATCTCTCAAAGACTTGGATGTGCA  | 21  | 0   | RDR2-resistant |
| ATCTCTCTAATCTTGTTCGGCTAAG | 34  | 4   | RDR2-resistant |
| ATCTCTCTGCTGTAGTTTGGCAT   | 78  | 28  | RDR2-resistant |
| ATCTCTGACGGCTCTGTACGAGGC  | 0   | 11  | RDR2-sensitive |
| ATCTCTGACGGGCTGGTGTGGCA   | 0   | 10  | RDR2-sensitive |
| ATCTCTGACTGCGAAGATCGACAA  | 0   | 31  | RDR2-sensitive |



|                           |    |     |                |
|---------------------------|----|-----|----------------|
| ATCTCTGACTGCGAAGATCGACAG  | 0  | 15  | RDR2-sensitive |
| ATCTCTGCGGTCGGTGATTCGGA   | 1  | 44  | RDR2-sensitive |
| ATCTCTGGTCTGGACTGCGGACGG  | 1  | 16  | RDR2-sensitive |
| ATCTCTGTAGCGTTCGGCATTGAG  | 1  | 22  | RDR2-sensitive |
| ATCTCTGTCGGATGTCGGAGACGA  | 0  | 11  | RDR2-sensitive |
| ATCTCTTGTAGTTTTTTGTTGTCT  | 29 | 0   | RDR2-resistant |
| ATCTCTTGTGAACCAGACTGGCCA  | 0  | 62  | RDR2-sensitive |
| ATCTCTTACTAGTCGAGGACGTT   | 0  | 9   | RDR2-sensitive |
| ATCTGAAATCTCTGTATACTAAAC  | 0  | 11  | RDR2-sensitive |
| ATCTGAACACAATTTCTTATGGCC  | 19 | 0   | RDR2-resistant |
| ATCTGAACGCGCGTGCAAGGGCAA  | 0  | 12  | RDR2-sensitive |
| ATCTGAACTTTGAAAGTGGTGGA   | 1  | 16  | RDR2-sensitive |
| ATCTGAACTTTTAGCTGCATTAAA  | 22 | 1   | RDR2-resistant |
| ATCTGAATTTGTTGGACTTCGGC   | 46 | 6   | RDR2-resistant |
| ATCTGACAGTGGTTCGCGGTAAA   | 0  | 10  | RDR2-sensitive |
| ATCTGACATATGAGGAGTGGACAT  | 0  | 10  | RDR2-sensitive |
| ATCTGACATGTCGGGTACAGATTC  | 1  | 15  | RDR2-sensitive |
| ATCTGACCGTGATGTGAAGTTTGT  | 2  | 17  | RDR2-sensitive |
| ATCTGACCTGGGCTGACGACTGCC  | 0  | 9   | RDR2-sensitive |
| ATCTGACCTGGGCTGACGACTGTC  | 0  | 10  | RDR2-sensitive |
| ATCTGACGGTCCGTAACGTAACATA | 0  | 10  | RDR2-sensitive |
| ATCTGACGGTGACCTGCCTGACGG  | 0  | 18  | RDR2-sensitive |
| ATCTGACTCTGACAGCAACGGTCCG | 1  | 15  | RDR2-sensitive |
| ATCTGACTTGAACTTGCTTGAAG   | 16 | 0   | RDR2-resistant |
| ATCTGAGACGGTAGGTTATACTAG  | 0  | 15  | RDR2-sensitive |
| ATCTGAGCACTGTGTGATGACGTC  | 4  | 33  | RDR2-sensitive |
| ATCTGAGCATGTAGACGCCACCGA  | 0  | 36  | RDR2-sensitive |
| ATCTGAGCGTCCGACAGGGGCAGTC | 15 | 0   | RDR2-resistant |
| ATCTGAGCGTGCAGGCTGATCTCG  | 0  | 10  | RDR2-sensitive |
| ATCTGAGTATCGTAGAGATTGCAT  | 0  | 11  | RDR2-sensitive |
| ATCTGAGTATTGTGTGGATTACGT  | 1  | 16  | RDR2-sensitive |
| ATCTGAGTCGGCTCGACACGGTCC  | 0  | 15  | RDR2-sensitive |
| ATCTGATACGTTGAGGAATGGATT  | 0  | 9   | RDR2-sensitive |
| ATCTGATATTCGTGACGGTGTGCAT | 0  | 11  | RDR2-sensitive |
| ATCTGATCTGATCCAATCGCGGAC  | 0  | 25  | RDR2-sensitive |
| ATCTGATGAGTGTGACCGACGAGC  | 0  | 11  | RDR2-sensitive |
| ATCTGATGGACCTGTATGTAGGAT  | 0  | 11  | RDR2-sensitive |
| ATCTGATGTGGCATTGTTGGAAAC  | 0  | 13  | RDR2-sensitive |
| ATCTGATTACGGTTGGACTAAAAC  | 0  | 25  | RDR2-sensitive |
| ATCTGATTGTGAATGTAGTTGGAG  | 0  | 10  | RDR2-sensitive |
| ATCTGCAGAGCTGATTTCCGTGTG  | 0  | 28  | RDR2-sensitive |
| ATCTGCCAGTTGATCACAGGACAA  | 0  | 13  | RDR2-sensitive |
| ATCTGCGACGCAGGATCGGACGTT  | 0  | 24  | RDR2-sensitive |
| ATCTGCGCATCTGTGGAGCCAGGC  | 1  | 211 | RDR2-sensitive |
| ATCTGCGTGATTGGTTGTCCTATA  | 0  | 11  | RDR2-sensitive |
| ATCTGCTAGAGCGATCACAGACGA  | 0  | 9   | RDR2-sensitive |
| ATCTGCTCAGGCTGTACGCGGACA  | 0  | 14  | RDR2-sensitive |
| ATCTGCTCTGGTAGAGAAGCTGCT  | 0  | 20  | RDR2-sensitive |
| ATCTGCTGCTTAGATCATCGTCAA  | 16 | 0   | RDR2-resistant |

|                           |    |     |                |
|---------------------------|----|-----|----------------|
| ATCTGCTGGACCTGCAGGTGGGGT  | 0  | 16  | RDR2-sensitive |
| ATCTGCTGGTGCGGACTAGGAGGC  | 0  | 15  | RDR2-sensitive |
| ATCTGGAACGGAACGGCTCTATTT  | 0  | 9   | RDR2-sensitive |
| ATCTGGAACGGAGCGGCTCTGTTT  | 2  | 97  | RDR2-sensitive |
| ATCTGGAACCTGAATTCATGGGGCA | 0  | 10  | RDR2-sensitive |
| ATCTGGACAAATAAGCTAGACTGT  | 0  | 12  | RDR2-sensitive |
| ATCTGGACACCGGTATAGCTTCTT  | 1  | 13  | RDR2-sensitive |
| ATCTGGACCCCGCATAGAACCGGAC | 0  | 18  | RDR2-sensitive |
| ATCTGGACCGGTTCAGTAGCGCAC  | 0  | 10  | RDR2-sensitive |
| ATCTGGACGCAGGAGCGACGCCTT  | 1  | 21  | RDR2-sensitive |
| ATCTGGACTAACATGGACGGACAC  | 0  | 13  | RDR2-sensitive |
| ATCTGGACTGGACGAGATGACGAG  | 0  | 16  | RDR2-sensitive |
| ATCTGGACTGGGGCACGCGGCATA  | 0  | 9   | RDR2-sensitive |
| ATCTGGACTGGGGCACGCGGCGAC  | 0  | 19  | RDR2-sensitive |
| ATCTGGACTGGTTCGGCGAAGGGC  | 4  | 42  | RDR2-sensitive |
| ATCTGGACTGTAGCCCCGGTCCGGC | 0  | 9   | RDR2-sensitive |
| ATCTGGCAGATAGATCATCGGGAT  | 0  | 20  | RDR2-sensitive |
| ATCTGGCCCGTCAGACAGAAACGT  | 0  | 11  | RDR2-sensitive |
| ATCTGGCCTGCATGCATTGAGATG  | 0  | 20  | RDR2-sensitive |
| ATCTGGCGCTTAATGAACTGGTAT  | 0  | 14  | RDR2-sensitive |
| ATCTGGCGGCTGAAGCGAGGACGA  | 2  | 85  | RDR2-sensitive |
| ATCTGGCGTGAGAGAGAAGAGCGT  | 0  | 10  | RDR2-sensitive |
| ATCTGGCTCTGATAACCACTGAAGG | 19 | 1   | RDR2-resistant |
| ATCTGGCTGTAGGGAGAATCCGGC  | 0  | 17  | RDR2-sensitive |
| ATCTGGCTTATGAAACGGTGACCA  | 22 | 1   | RDR2-resistant |
| ATCTGGGCTGGAGCACGCGGCGAC  | 0  | 19  | RDR2-sensitive |
| ATCTGGGCTGGGACACGCAGCGAC  | 0  | 19  | RDR2-sensitive |
| ATCTGGGCTGGGACACGCGGCGAC  | 2  | 85  | RDR2-sensitive |
| ATCTGGGCTGGGGCACGCGGCGAC  | 7  | 38  | RDR2-sensitive |
| ATCTGGGTTGAAATGAATGGTGTT  | 22 | 0   | RDR2-resistant |
| ATCTGGTTCGGATCTGATCGTTGTG | 25 | 4   | RDR2-resistant |
| ATCTGGTGCACATAGAAGACTGGT  | 3  | 37  | RDR2-sensitive |
| ATCTGGTGGAACTGCAGGTGGCGT  | 0  | 18  | RDR2-sensitive |
| ATCTGGTGGACCTGCAGGCGAGGT  | 0  | 12  | RDR2-sensitive |
| ATCTGGTGGACCTGCAGGTGGGGC  | 3  | 111 | RDR2-sensitive |
| ATCTGGTGGACCTGCAGGTGGGGT  | 0  | 20  | RDR2-sensitive |
| ATCTGGTGGACCTGTAGATGGGGT  | 0  | 25  | RDR2-sensitive |
| ATCTGGTGGACCTGTAGGTGGGGC  | 0  | 66  | RDR2-sensitive |
| ATCTGGTGGATCTGCAGGTGGGGT  | 0  | 24  | RDR2-sensitive |
| ATCTGGTGGCACTGTTCGATCCGGT | 0  | 9   | RDR2-sensitive |
| ATCTGGTTCTATGTAGGTCTAGGC  | 0  | 19  | RDR2-sensitive |
| ATCTGGTTGTGCTTGATCCGTGGC  | 14 | 0   | RDR2-resistant |
| ATCTGGTTGTGGATGCGGCTTCTA  | 0  | 9   | RDR2-sensitive |
| ATCTGTACAGAGCGGCCTGATGTA  | 0  | 17  | RDR2-sensitive |
| ATCTGTACAGGATAGAGTTGTGAC  | 19 | 55  | RDR2-sensitive |
| ATCTGTACAGTCGTCGGAAGGCTG  | 2  | 92  | RDR2-sensitive |
| ATCTGTACAGTCGTCGGGAGGCCG  | 0  | 30  | RDR2-sensitive |
| ATCTGTACAGTCGTCGGGAGGCTG  | 0  | 17  | RDR2-sensitive |
| ATCTGTACAGTCGTCGTGAGGCCG  | 0  | 9   | RDR2-sensitive |

|                           |    |     |                |
|---------------------------|----|-----|----------------|
| ATCTGTACGAGCTTAAATGGCGAT  | 0  | 19  | RDR2-sensitive |
| ATCTGTAGAGCCAGGCTTCAGCGG  | 1  | 15  | RDR2-sensitive |
| ATCTGTAGGACACATGTAGGTGGT  | 0  | 23  | RDR2-sensitive |
| ATCTGTAGGAGCCTAGAGGTGCTT  | 0  | 9   | RDR2-sensitive |
| ATCTGTAGTATAGAGTTGAAGCAT  | 0  | 10  | RDR2-sensitive |
| ATCTGTAGTTTATAATCGGACGGT  | 2  | 16  | RDR2-sensitive |
| ATCTGTAGTTTTACGACGTTTCAT  | 0  | 23  | RDR2-sensitive |
| ATCTGTATCGACTCTTACCGGTGT  | 2  | 21  | RDR2-sensitive |
| ATCTGTCCGAGTCAGAACCCGTGC  | 0  | 12  | RDR2-sensitive |
| ATCTGTGCGACTGTTGACGTGCTAC | 1  | 17  | RDR2-sensitive |
| ATCTGTGCGGTAGCAGATACGCAA  | 0  | 18  | RDR2-sensitive |
| ATCTGTGCGTCTTATGGGAAGGGA  | 0  | 11  | RDR2-sensitive |
| ATCTGTCTAGATGAGCTCGTAGGT  | 16 | 0   | RDR2-resistant |
| ATCTGTCTCGATTGATGACGCGTG  | 0  | 9   | RDR2-sensitive |
| ATCTGTCTCGTTTTGACTTCCGGA  | 0  | 10  | RDR2-sensitive |
| ATCTGTGACGGCAGGGACTTGCGT  | 19 | 0   | RDR2-resistant |
| ATCTGTGCGGACCGTGCCAGAGGC  | 0  | 11  | RDR2-sensitive |
| ATCTGTGGAATAAGGGCATCCCGA  | 0  | 16  | RDR2-sensitive |
| ATCTGTGGAATAGGGGCATCCCGG  | 0  | 9   | RDR2-sensitive |
| ATCTGTGGAGCCAGGCTCACGCGA  | 1  | 17  | RDR2-sensitive |
| ATCTGTGGCGCTCGTTTTGACGGA  | 0  | 9   | RDR2-sensitive |
| ATCTGTGGGAGCGCATGCAACGTG  | 0  | 18  | RDR2-sensitive |
| ATCTGTGTCCGACTTGTTCCGCAT  | 0  | 14  | RDR2-sensitive |
| ATCTGTGTGCGGCTCAAACGGATC  | 0  | 19  | RDR2-sensitive |
| ATCTGTGTCTATGATTTGTGGGAC  | 1  | 13  | RDR2-sensitive |
| ATCTGTGTCTATGATTTGTGGGTC  | 1  | 50  | RDR2-sensitive |
| ATCTGTGTTAGGATTGAAAACGGA  | 0  | 12  | RDR2-sensitive |
| ATCTGTGTTGGATGATATTGTATT  | 73 | 3   | RDR2-resistant |
| ATCTGTGTTTATGATTTGTAGGCC  | 0  | 10  | RDR2-sensitive |
| ATCTGTTCCGGACCGGCATGACTT  | 0  | 12  | RDR2-sensitive |
| ATCTGTTCCGCGACTCGGCCCTAT  | 0  | 9   | RDR2-sensitive |
| ATCTGTTCCGGGCTCAAACGGACAG | 0  | 15  | RDR2-sensitive |
| ATCTGTTCCGGGCTTATTCGTGCTG | 0  | 16  | RDR2-sensitive |
| ATCTGTTCTATAGGATCGTACCGT  | 45 | 4   | RDR2-resistant |
| ATCTGTTCTGTATCTAACGGTGTT  | 0  | 9   | RDR2-sensitive |
| ATCTGTTGCTAGTCTGATCGTCGC  | 0  | 11  | RDR2-sensitive |
| ATCTGTTGGACCTGCAGGTGGGGT  | 0  | 13  | RDR2-sensitive |
| ATCTGTTTAGTGAGGATCGTCCGT  | 0  | 19  | RDR2-sensitive |
| ATCTGTTTCTCGGTGTAGTTAGGC  | 23 | 2   | RDR2-resistant |
| ATCTGTTTGAAC TTGGTGTGAGGC | 16 | 0   | RDR2-resistant |
| ATCTGTTTGACGTGTTACATAACT  | 30 | 2   | RDR2-resistant |
| ATCTGTTTGGCAGA ACTTCGGCTT | 8  | 128 | RDR2-sensitive |
| ATCTGTTTTGCTCGGCAACACGGT  | 0  | 10  | RDR2-sensitive |
| ATCTGTTTTTCTGCGGCTGATGA   | 20 | 1   | RDR2-resistant |
| ATCTGTTTTTTTTCTGATTTGGGC  | 26 | 0   | RDR2-resistant |
| ATCTTAAGGATGGTGCCTCGTAGA  | 31 | 5   | RDR2-resistant |
| ATCTTACAAGTGATCTTTGATGGC  | 46 | 1   | RDR2-resistant |
| ATCTTACTCACTATGTGTTGGACA  | 0  | 9   | RDR2-sensitive |
| ATCTTAGAATTCTTTTTGCGGCAT  | 16 | 0   | RDR2-resistant |

|                           |     |     |                |
|---------------------------|-----|-----|----------------|
| ATCTTAGAATTCTTTTTGCGGCCT  | 32  | 0   | RDR2-resistant |
| ATCTTAGGACTTAGGGCGGGTGCA  | 0   | 19  | RDR2-sensitive |
| ATCTTAGGACTTAGGGCGGGTGGA  | 0   | 11  | RDR2-sensitive |
| ATCTTAGGATTAGGACGGGTGCAT  | 0   | 16  | RDR2-sensitive |
| ATCTTAGGATTAGGGCGGGTGCAT  | 0   | 11  | RDR2-sensitive |
| ATCTTAGGATTTAGGGCGGGTGCA  | 0   | 11  | RDR2-sensitive |
| ATCTTATGGTCCGACTGTACCGGT  | 4   | 19  | RDR2-sensitive |
| ATCTTATTTGAGAGATCGTCCTAT  | 0   | 10  | RDR2-sensitive |
| ATCTTATTTGAGAGATCGTTTTCAT | 0   | 12  | RDR2-sensitive |
| ATCTTCAACGCGGGCTGACGTCAT  | 8   | 113 | RDR2-sensitive |
| ATCTTCATGCTGTAGAAGATGGTA  | 0   | 23  | RDR2-sensitive |
| ATCTTCCGGTAAATTTAGAGGACG  | 0   | 12  | RDR2-sensitive |
| ATCTTCCTGGGATTCTTTGTCTGG  | 0   | 11  | RDR2-sensitive |
| ATCTTCGACGGCTGTAATAAGGGC  | 0   | 9   | RDR2-sensitive |
| ATCTTCGACGGTTTACAGCTTATG  | 0   | 12  | RDR2-sensitive |
| ATCTTCGGACTCAAGTCAGGCATC  | 2   | 28  | RDR2-sensitive |
| ATCTTCGGACTCAAGTCGGTATCA  | 0   | 19  | RDR2-sensitive |
| ATCTTCGTTGACGGATATTGAGAT  | 25  | 0   | RDR2-resistant |
| ATCTTCTCTGTATCGTTCCAATTT  | 118 | 3   | RDR2-resistant |
| ATCTTCTTAGGATGCTTTTGTCTGG | 0   | 12  | RDR2-sensitive |
| ATCTTCTTGGGATGCTTTTGTCTGG | 1   | 12  | RDR2-sensitive |
| ATCTTCTTGGGATTCTTTTGTCTGG | 0   | 42  | RDR2-sensitive |
| ATCTTGA ACTATTGAAGGCTCGTT | 0   | 14  | RDR2-sensitive |
| ATCTTGAAGATGGATGACTTTTGT  | 26  | 4   | RDR2-resistant |
| ATCTTGACGACTGTACAGATTGCG  | 0   | 12  | RDR2-sensitive |
| ATCTTGAGTTGTAGCTAGGGACGT  | 0   | 11  | RDR2-sensitive |
| ATCTTGCAAACTGGACGAGCGC    | 0   | 9   | RDR2-sensitive |
| ATCTTGCAGAACTGGACGAGCGC   | 1   | 35  | RDR2-sensitive |
| ATCTTGCATCGTTGTGGCCTGGCC  | 1   | 22  | RDR2-sensitive |
| ATCTTGGATATGTGACGGTGGCTT  | 3   | 19  | RDR2-sensitive |
| ATCTTGGCCGGCTGGAGATGGAGC  | 0   | 18  | RDR2-sensitive |
| ATCTTGTTGGTCCGTA AAGGTATT | 2   | 21  | RDR2-sensitive |
| ATCTTGTTTTATAGACGTCCGGAC  | 0   | 10  | RDR2-sensitive |
| ATCTTTAGGACTGATTTGATGGAT  | 0   | 12  | RDR2-sensitive |
| ATCTTTATTGCAGAGATTCTGGTT  | 2   | 19  | RDR2-sensitive |
| ATCTTTCCGATCGGCTGGCCACAC  | 0   | 19  | RDR2-sensitive |
| ATCTTTGCCTTCTGTCGTCGGGCG  | 0   | 18  | RDR2-sensitive |
| ATCTTTGGGGCTGATTGATGGGTA  | 0   | 11  | RDR2-sensitive |
| ATCTTTGGTTGTGCGTGATTCGGT  | 19  | 0   | RDR2-resistant |
| ATCTTTGTAAAGGCTACGTAGTGA  | 0   | 9   | RDR2-sensitive |
| ATCTTTTAGAGAAGACTGTAAAAG  | 0   | 10  | RDR2-sensitive |
| ATCTTTTAGAGAAGACTGTAAAGA  | 0   | 23  | RDR2-sensitive |
| ATCTTTTAGAGAAGACTGTAAAGG  | 0   | 40  | RDR2-sensitive |
| ATCTTTTAGAGGAGACTGTAAAGG  | 1   | 35  | RDR2-sensitive |
| ATCTTTTCAGGATCAGACTTGCAT  | 0   | 20  | RDR2-sensitive |
| ATGAAACACGACGGATGCGGCTTT  | 0   | 24  | RDR2-sensitive |
| ATGAAATGTGGGTCTGATGGCAAT  | 0   | 16  | RDR2-sensitive |
| ATGAACCACCGCAGCTAGGACCGA  | 0   | 14  | RDR2-sensitive |
| ATGAACGTCCGACGCTGACGATGG  | 0   | 11  | RDR2-sensitive |

|                           |     |    |                |
|---------------------------|-----|----|----------------|
| ATGAAGACGTCATGTGCACTCACT  | 19  | 0  | RDR2-resistant |
| ATGAAGACTGTAAGGGGGTAGGCT  | 0   | 12 | RDR2-sensitive |
| ATGAAGGCGCTGTGGAGAAGACGC  | 0   | 26 | RDR2-sensitive |
| ATGAAGTGAATTGTTGGACACGGT  | 0   | 9  | RDR2-sensitive |
| ATGAATCTTAGTGACTACCGTGCC  | 21  | 2  | RDR2-resistant |
| ATGAATGCCTGAAACGTAATGAGA  | 23  | 1  | RDR2-resistant |
| ATGAATTCTTGTGCGCTGGGACGA  | 1   | 14 | RDR2-sensitive |
| ATGAATTGTGGACGTCTACGTTAG  | 0   | 11 | RDR2-sensitive |
| ATGACAATATTCACTAGACTTAAG  | 38  | 1  | RDR2-resistant |
| ATGACACGGTCTGAAGACGGGTAT  | 0   | 14 | RDR2-sensitive |
| ATGACACTAGGTACGATTCGGAGC  | 14  | 0  | RDR2-resistant |
| ATGACACTCTGCAATAAAGACGAT  | 0   | 11 | RDR2-sensitive |
| ATGACACTCTGCTCTGATCTGTCT  | 28  | 0  | RDR2-resistant |
| ATGACACTGTACGAGGCTTGGCAT  | 38  | 0  | RDR2-resistant |
| ATGACAGAGCTGGAGAAGATCGCC  | 24  | 1  | RDR2-resistant |
| ATGACAGGACGGGATGGGACGGGA  | 0   | 10 | RDR2-sensitive |
| ATGACAGTTGTTGATATGGCATG   | 0   | 9  | RDR2-sensitive |
| ATGACATGTAGGGTCAGTGGCATA  | 0   | 15 | RDR2-sensitive |
| ATGACATGTGGGACCAGTGGCATA  | 0   | 14 | RDR2-sensitive |
| ATGACATGTGGGATCTATGGTATA  | 0   | 15 | RDR2-sensitive |
| ATGACATGTGGGGCCAGTGGCATA  | 1   | 32 | RDR2-sensitive |
| ATGACCCAGACTCGGCACAGTTAT  | 1   | 13 | RDR2-sensitive |
| ATGACCTGGACGCAAGAGCGACTC  | 0   | 10 | RDR2-sensitive |
| ATGACGACATACATCTGTGCTTAT  | 1   | 22 | RDR2-sensitive |
| ATGACGATGTAGCATTAGGGGTAT  | 0   | 9  | RDR2-sensitive |
| ATGACGCGTGGCAGAGAACTGCAT  | 1   | 31 | RDR2-sensitive |
| ATGACGGATGTAGAGGACGTTGCT  | 0   | 17 | RDR2-sensitive |
| ATGACGGATTATATTCAGACTGCA  | 27  | 0  | RDR2-resistant |
| ATGACGTAACCTCGGGAGTGGACGG | 0   | 13 | RDR2-sensitive |
| ATGACGTGTTTGACGACTCGACGG  | 1   | 12 | RDR2-sensitive |
| ATGACTAGGCTCGTTGGCTCGGCG  | 1   | 21 | RDR2-sensitive |
| ATGACTAGTTGTTCTGAAAGACGC  | 0   | 14 | RDR2-sensitive |
| ATGACTATCTTTATTCATGAGCAT  | 26  | 0  | RDR2-resistant |
| ATGACTATGTGACTAATACGTGCT  | 23  | 1  | RDR2-resistant |
| ATGACTCGCCAGAACGACGCGCCG  | 0   | 14 | RDR2-sensitive |
| ATGACTCTCGGCACATGCAGGCAC  | 0   | 10 | RDR2-sensitive |
| ATGACTCTGGTCACTGTTACGGC   | 354 | 19 | RDR2-resistant |
| ATGACTGCAGAGGATTGTGGTATA  | 2   | 64 | RDR2-sensitive |
| ATGACTGCAGAGGATTGTGTTATA  | 0   | 10 | RDR2-sensitive |
| ATGACTGCGGGCGGATATTTCAA   | 0   | 41 | RDR2-sensitive |
| ATGACTGCTTCATGATCTACGGTG  | 27  | 2  | RDR2-resistant |
| ATGACTGGGCACACGTGCTGGCAC  | 0   | 27 | RDR2-sensitive |
| ATGACTGGTCTCTGTGGAAGCGTA  | 0   | 29 | RDR2-sensitive |
| ATGACTGTCATACGCATGCTCCGC  | 0   | 12 | RDR2-sensitive |
| ATGACTGTGACGCTGGAAGACTGC  | 0   | 11 | RDR2-sensitive |
| ATGACTGTGGTTATGGATGCTCGC  | 30  | 1  | RDR2-resistant |
| ATGACTGTTTCATTGCGCATTTGAG | 28  | 3  | RDR2-resistant |
| ATGACTGTTGACCGAACACGGTAT  | 0   | 10 | RDR2-sensitive |
| ATGACTGTTGGGTATATAATCTTG  | 14  | 0  | RDR2-resistant |

|                           |     |    |                |
|---------------------------|-----|----|----------------|
| ATGACTGTTTCTTCTAGACGGTTC  | 0   | 9  | RDR2-sensitive |
| ATGACTGTTTCTTCTGGACGGTTC  | 0   | 26 | RDR2-sensitive |
| ATGACTGTTTGGAAAATGTGGTTT  | 0   | 18 | RDR2-sensitive |
| ATGACTTGCTTGGTTGTGGATCGT  | 0   | 10 | RDR2-sensitive |
| ATGACTTTGCACTAGATACTGGCT  | 0   | 10 | RDR2-sensitive |
| ATGACTTTGGACAGACGTTTTTGG  | 0   | 9  | RDR2-sensitive |
| ATGAGAAGACTGTTGTAGATGGCA  | 118 | 1  | RDR2-resistant |
| ATGAGACAGACGTTATAATGGATT  | 19  | 1  | RDR2-resistant |
| ATGAGACATGTTGGACTAGCGTGC  | 0   | 10 | RDR2-sensitive |
| ATGAGACGGTTCATAGGTGCCCTG  | 652 | 18 | RDR2-resistant |
| ATGAGATGAGACTAGCTCGTTGGT  | 22  | 0  | RDR2-resistant |
| ATGAGCCAAGTAGAACGGAGCCGT  | 2   | 15 | RDR2-sensitive |
| ATGAGCCTGACTGAGATGAGCCAT  | 1   | 49 | RDR2-sensitive |
| ATGAGCCTGATAGCATACTGACGA  | 0   | 22 | RDR2-sensitive |
| ATGAGCTCTGCCATGTCTAGACAA  | 0   | 10 | RDR2-sensitive |
| ATGAGCTGTATTTTGTGAGATCGT  | 0   | 13 | RDR2-sensitive |
| ATGAGGAATGAGGTGGTGATGGAT  | 0   | 10 | RDR2-sensitive |
| ATGAGGACAACATGCATTGCTTAT  | 32  | 2  | RDR2-resistant |
| ATGAGGACGTGTATATGATACAGC  | 19  | 0  | RDR2-resistant |
| ATGAGGAGGCTGGAGAGGTGGCTC  | 15  | 0  | RDR2-resistant |
| ATGAGGATGTGCCGGATTCGGCTT  | 82  | 2  | RDR2-resistant |
| ATGAGGATGTGCTAGATTCGGCTT  | 83  | 3  | RDR2-resistant |
| ATGAGGTTGGTCTGTTGCCCGGC   | 0   | 10 | RDR2-sensitive |
| ATGAGTAGAGGACGTTCTGATCCT  | 0   | 14 | RDR2-sensitive |
| ATGAGTCCGATGGCATACTGGCGA  | 0   | 27 | RDR2-sensitive |
| ATGAGTCGGGCGTCCGGACGTTTT  | 0   | 9  | RDR2-sensitive |
| ATGAGTCTGGTGTATGTTGACATG  | 34  | 4  | RDR2-resistant |
| ATGAGTCTGGTGTATGTTGGCATG  | 102 | 0  | RDR2-resistant |
| ATGAGTCTGTTAGGCCCGTCGGAC  | 0   | 22 | RDR2-sensitive |
| ATGAGTGTGTGACTCGTGCGGTGC  | 24  | 0  | RDR2-resistant |
| ATGAGTTGTAGAAAGAGGCTCGGC  | 0   | 9  | RDR2-sensitive |
| ATGATAGCGGTGTAGTGAGACGAC  | 3   | 19 | RDR2-sensitive |
| ATGATATTGATTGTGGCGATGTTT  | 18  | 0  | RDR2-resistant |
| ATGATCGAGCGATGACATTTATTC  | 50  | 3  | RDR2-resistant |
| ATGATCGGACGATTTATGTGCATT  | 0   | 16 | RDR2-sensitive |
| ATGATCGGTTAACTGCATAGCATG  | 0   | 15 | RDR2-sensitive |
| ATGATCTACCTGTAGAGATGGCAA  | 0   | 17 | RDR2-sensitive |
| ATGATCTATTATGTTTGTAGGTC   | 24  | 1  | RDR2-resistant |
| ATGATCTGTCGTTTCCTGTTGGCA  | 38  | 6  | RDR2-resistant |
| ATGATCTTGTTTCTGTTGGTTTTA  | 59  | 1  | RDR2-resistant |
| ATGATGCCAGGATTGATGGTAATC  | 17  | 0  | RDR2-resistant |
| ATGATGGACTCTTGGATGAGGCAC  | 44  | 9  | RDR2-resistant |
| ATGATGTCTTCTGAAAATTCGGT   | 14  | 0  | RDR2-resistant |
| ATGATGTTCTTATGCCGATGATGA  | 14  | 0  | RDR2-resistant |
| ATGATGTTGTATTGATGAGATGGT  | 17  | 1  | RDR2-resistant |
| ATGATTGAGGATAGTGAAGTCGGT  | 18  | 0  | RDR2-resistant |
| ATGATTTACTCTGTCATGGATATT  | 25  | 2  | RDR2-resistant |
| ATGATTTAGTGAACGTTGATTTTA  | 19  | 0  | RDR2-resistant |
| ATGATTTATGGATTTCGATGGCATA | 0   | 15 | RDR2-sensitive |

|                           |     |     |                |
|---------------------------|-----|-----|----------------|
| ATGATTTGTGGATCCGATGGCATA  | 0   | 17  | RDR2-sensitive |
| ATGATTTGTGGGCCCGATGGCATA  | 0   | 21  | RDR2-sensitive |
| ATGATTTGTGGGTCCGATGGCATA  | 7   | 668 | RDR2-sensitive |
| ATGATTTGTGGGTCCGATGGTATA  | 0   | 15  | RDR2-sensitive |
| ATGATTTGTGGGTCTGACGGTAAA  | 0   | 14  | RDR2-sensitive |
| ATGATTTGTTATTATGGTCTGATC  | 44  | 3   | RDR2-resistant |
| ATGATTTTAGTAGATATGGGTATG  | 57  | 3   | RDR2-resistant |
| ATGCAAAATTTGTAGAATGGCATT  | 0   | 10  | RDR2-sensitive |
| ATGCAACAGGCCGATATAGACCAT  | 0   | 19  | RDR2-sensitive |
| ATGCAACGGACGGGTACGGGCTAT  | 1   | 23  | RDR2-sensitive |
| ATGCACAAAGATCTGGAATTTTAT  | 15  | 0   | RDR2-resistant |
| ATGCACACCTGCATGACTGTCTGA  | 0   | 9   | RDR2-sensitive |
| ATGCACACGGACGGTCTAGATCGC  | 0   | 12  | RDR2-sensitive |
| ATGCACACGTGGACCGTCCGGCTC  | 0   | 19  | RDR2-sensitive |
| ATGCACATGCTCGTGTTCGGTA    | 0   | 21  | RDR2-sensitive |
| ATGCACCTCTGCGGTCCGGACGAA  | 2   | 19  | RDR2-sensitive |
| ATGCACGGGCGTAGAAGGAGGCAT  | 1   | 22  | RDR2-sensitive |
| ATGCACTGTGGAAGATTGCAGGAA  | 0   | 16  | RDR2-sensitive |
| ATGCAGCGATTTGGTTACTTTGGT  | 0   | 13  | RDR2-sensitive |
| ATGCAGCGGAGGAATGTTTTTATA  | 54  | 6   | RDR2-resistant |
| ATGCAGCTCGGCGTCATGAATCAT  | 0   | 14  | RDR2-sensitive |
| ATGCAGGACTTAGAATGGGGGCAC  | 0   | 13  | RDR2-sensitive |
| ATGCAGGATCGGATAACTCCTCAC  | 0   | 17  | RDR2-sensitive |
| ATGCAGGATGGTGGGAGAAGTCAC  | 0   | 25  | RDR2-sensitive |
| ATGCAGGGCGGTGGACGAAGGCAC  | 0   | 15  | RDR2-sensitive |
| ATGCAGGGTGACGATGACATGAAC  | 46  | 1   | RDR2-resistant |
| ATGCAGGTCCGGTATCCTCGTATAC | 0   | 10  | RDR2-sensitive |
| ATGCAGTCGGCATTTCAGTTTTGCA | 0   | 10  | RDR2-sensitive |
| ATGCAGTTGGGATTAGCGTGCATT  | 34  | 0   | RDR2-resistant |
| ATGCATAAGTATCTGGATGACAAT  | 52  | 2   | RDR2-resistant |
| ATGCATATACCCGTCGGATATTGC  | 0   | 10  | RDR2-sensitive |
| ATGCATCTAGACCGGCCTCTTCTT  | 42  | 1   | RDR2-resistant |
| ATGCATCTTCAAGTTGAATTCGGT  | 0   | 16  | RDR2-sensitive |
| ATGCATGTTGACGGTGGTCCAGAA  | 17  | 0   | RDR2-resistant |
| ATGCATGTTTGACTGAGTTAGGCA  | 0   | 18  | RDR2-sensitive |
| ATGCATTAAGTGTGAACAAGACGT  | 0   | 10  | RDR2-sensitive |
| ATGCATTTCGAGGATACTCCATAGG | 147 | 3   | RDR2-resistant |
| ATGCCAGATCGCGGGTACTCGGCA  | 0   | 9   | RDR2-sensitive |
| ATGCCAGATTGGAGGACCAGGCAC  | 0   | 9   | RDR2-sensitive |
| ATGCCAGTTCGCGGACCGTCCGGC  | 0   | 15  | RDR2-sensitive |
| ATGCCAGTTGGTCTGTATGTGCGG  | 0   | 11  | RDR2-sensitive |
| ATGCCCGGCAAATGTAGCGGCTGA  | 1   | 49  | RDR2-sensitive |
| ATGCCCTACTGTAGACGGTCAGAC  | 0   | 10  | RDR2-sensitive |
| ATGCCCTGATTGGACTGGACCCAA  | 0   | 38  | RDR2-sensitive |
| ATGCCGACGGATGCTGTGATGGTA  | 0   | 18  | RDR2-sensitive |
| ATGCCGCGGTGTAGGGATGGGCGA  | 0   | 14  | RDR2-sensitive |
| ATGCCGTGACTGGACCGTGGCTGC  | 0   | 18  | RDR2-sensitive |
| ATGCCTAGGCTCGTTGGCTCGGCG  | 1   | 25  | RDR2-sensitive |
| ATGCCTGTAGTCCGGCATTTCGGG  | 0   | 9   | RDR2-sensitive |

|                           |    |     |                |
|---------------------------|----|-----|----------------|
| ATGCCTTTGTAGATCCGAGCGGCC  | 4  | 37  | RDR2-sensitive |
| ATGCGAAGACTGGTCTGCATGCGC  | 0  | 15  | RDR2-sensitive |
| ATGCGAATTCGAACTATGTGGAAT  | 46 | 3   | RDR2-resistant |
| ATGCGACCACGTAAGACTGCTTTT  | 0  | 10  | RDR2-sensitive |
| ATGCGACGCGTAAGGGGCACTCTA  | 0  | 11  | RDR2-sensitive |
| ATGCGACTGCCATGTTTTTCGGAT  | 3  | 21  | RDR2-sensitive |
| ATGCGACTGCGGCTTCTACATTAT  | 0  | 9   | RDR2-sensitive |
| ATGCGACTGGCGCGTGAATGGTTT  | 0  | 18  | RDR2-sensitive |
| ATGCGAGACAGACTGGAGGCCAGA  | 0  | 17  | RDR2-sensitive |
| ATGCGATTAAGCGGGCTAGGCTAG  | 0  | 10  | RDR2-sensitive |
| ATGCGATTGTGGAGACCGTGCTGT  | 0  | 13  | RDR2-sensitive |
| ATGCGATTTTCTGTAGGTTCCGGT  | 0  | 9   | RDR2-sensitive |
| ATGCGCCTCTGCAGAGAACCACCGC | 0  | 11  | RDR2-sensitive |
| ATGCGCGACGGGCTGAAGACGCGC  | 0  | 10  | RDR2-sensitive |
| ATGCGCGGACCGTCCGGCCCCACAG | 0  | 9   | RDR2-sensitive |
| ATGCGCTGCGGACGGTCTTAGTGT  | 0  | 10  | RDR2-sensitive |
| ATGCGGAAGTTTGGCTACTGTATT  | 0  | 21  | RDR2-sensitive |
| ATGCGGAGAGGAGAGAGAAGACGT  | 0  | 9   | RDR2-sensitive |
| ATGCGGAGTGCAAATACGGAGTCT  | 0  | 16  | RDR2-sensitive |
| ATGCGGAGTGCTGCTGGAGTTGGT  | 0  | 10  | RDR2-sensitive |
| ATGCGGAGTGGACGGAGTAGGAGC  | 0  | 9   | RDR2-sensitive |
| ATGCGGAGTGGTTAGTACAGTCAT  | 0  | 9   | RDR2-sensitive |
| ATGCGGATCAGGCGTGCAGCTCAG  | 0  | 20  | RDR2-sensitive |
| ATGCGGATCGGAGCCAGCCAACGG  | 0  | 27  | RDR2-sensitive |
| ATGCGGCAGGTACCTCGGCGCCAA  | 0  | 9   | RDR2-sensitive |
| ATGCGGCATGTAGGGAGCATTCTA  | 0  | 14  | RDR2-sensitive |
| ATGCGGCGCGTAGGGGCACTTTAC  | 0  | 9   | RDR2-sensitive |
| ATGCGGCTGCCATGTTTTTCGGAT  | 1  | 14  | RDR2-sensitive |
| ATGCGGGAGTTTGGCTACTGTATT  | 0  | 30  | RDR2-sensitive |
| ATGCGGGTTTGCCTGAACGTCGC   | 0  | 14  | RDR2-sensitive |
| ATGCGGTCAGCGCGGCACTGGTTC  | 18 | 1   | RDR2-resistant |
| ATGCGGTCTGTAGGGGCACCCTAT  | 0  | 25  | RDR2-sensitive |
| ATGCGTACTGTCGTGGACGGCCGG  | 0  | 12  | RDR2-sensitive |
| ATGCGTCGCTGTGTTCCGGCAAGCT | 1  | 42  | RDR2-sensitive |
| ATGCGTGCTGCAGAGCGGTATCTG  | 0  | 18  | RDR2-sensitive |
| ATGCGTGACGTGACAACCTGCTGT  | 17 | 0   | RDR2-resistant |
| ATGCGTGTGTAGAAGCGACGGAGT  | 0  | 17  | RDR2-sensitive |
| ATGCGTTCCGGTCTAGATGGATGTA | 0  | 9   | RDR2-sensitive |
| ATGCGTTGACTGAGCAAGTGCGTC  | 0  | 23  | RDR2-sensitive |
| ATGCGTTGCGACGGCTCACAACAA  | 0  | 12  | RDR2-sensitive |
| ATGCGTTGGGCTGAGACGCGCCGC  | 0  | 12  | RDR2-sensitive |
| ATGCGTTTCCTGTAGGTACGGCA   | 0  | 18  | RDR2-sensitive |
| ATGCTAGTAGCAAGGTCTCGGGCA  | 0  | 48  | RDR2-sensitive |
| ATGCTATGAATTAAGAACAAGGCA  | 1  | 16  | RDR2-sensitive |
| ATGCTCACTTTAAATCGTATCGGA  | 0  | 20  | RDR2-sensitive |
| ATGCTCGGCGCCAATGATGACGGC  | 0  | 22  | RDR2-sensitive |
| ATGCTCGGCGCCAATGATGATGGT  | 0  | 9   | RDR2-sensitive |
| ATGCTCTGCGTGAATCATGTGATC  | 14 | 0   | RDR2-resistant |
| ATGCTCTGGATAGTTTGATTGCAC  | 29 | 170 | RDR2-sensitive |



|                           |     |    |                |
|---------------------------|-----|----|----------------|
| ATGCTCTGTGAACTCGCGGCTCAT  | 17  | 0  | RDR2-resistant |
| ATGCTGACCTCTGGCCTTCGCAGC  | 0   | 17 | RDR2-sensitive |
| ATGCTGACGCGCGGAACGACGACG  | 0   | 11 | RDR2-sensitive |
| ATGCTGACTGTAGGAGGCACCCCA  | 0   | 21 | RDR2-sensitive |
| ATGCTGCACGTAAGGACTAGGCAC  | 0   | 10 | RDR2-sensitive |
| ATGCTGCAGAACTGAAGGGGTGTT  | 0   | 15 | RDR2-sensitive |
| ATGCTGCGGAAATCGGAACGGCGT  | 0   | 12 | RDR2-sensitive |
| ATGCTGCTGCTCCCTGACGGCACT  | 521 | 45 | RDR2-resistant |
| ATGCTGCTGGATTCTCAAGACGTG  | 68  | 0  | RDR2-resistant |
| ATGCTGCTGGTGTCTGGTCTCGTTA | 135 | 2  | RDR2-resistant |
| ATGCTGGAGCGGTATTACTCAAAG  | 39  | 3  | RDR2-resistant |
| ATGCTGGATTTGCTGGTCGCTGGA  | 4   | 19 | RDR2-sensitive |
| ATGCTGGTCTGCATACACTCATGC  | 0   | 9  | RDR2-sensitive |
| ATGCTGTAGAAGAGGGTACCCCTA  | 0   | 39 | RDR2-sensitive |
| ATGCTGTAGAAGAGGGTACCCCTG  | 0   | 21 | RDR2-sensitive |
| ATGCTGTAGAAGAGGGTACCCCTT  | 0   | 23 | RDR2-sensitive |
| ATGCTGTAGGAGAGGGTACCCCTA  | 1   | 15 | RDR2-sensitive |
| ATGCTGTAGGAGAGGGTACCCCTG  | 1   | 29 | RDR2-sensitive |
| ATGCTGTAGGAGAGGGTACCCCTT  | 0   | 10 | RDR2-sensitive |
| ATGCTGTAGTAAGGGGTACCCTGG  | 0   | 14 | RDR2-sensitive |
| ATGCTGTAGTAAGGTGTACCCCTG  | 0   | 13 | RDR2-sensitive |
| ATGCTGTATCATTTCTCGTCGGACA | 0   | 23 | RDR2-sensitive |
| ATGCTGTGGATCGATGGCTCGACC  | 0   | 36 | RDR2-sensitive |
| ATGCTGTGTTCTTTCAATTCGGTG  | 0   | 9  | RDR2-sensitive |
| ATGCTGTTGGCTTGAGCAGTAGGA  | 0   | 14 | RDR2-sensitive |
| ATGCTTCGGACCGATCTATCGGAC  | 0   | 10 | RDR2-sensitive |
| ATGCTTCGGGTCGATTTCGTCAGGC | 0   | 10 | RDR2-sensitive |
| ATGCTTGCCGTTTCGATCGTTGGC  | 0   | 15 | RDR2-sensitive |
| ATGCTTGTTTGCAGATGAACGGAC  | 0   | 35 | RDR2-sensitive |
| ATGCTTGTTTGCAGATGGACGGAC  | 0   | 10 | RDR2-sensitive |
| ATGCTTTAATGGATTCAAATGAAG  | 24  | 1  | RDR2-resistant |
| ATGGAACGAAGATGGAATCATG    | 75  | 0  | RDR2-resistant |
| ATGGAAACTAGAGGGCAACCCAC   | 0   | 9  | RDR2-sensitive |
| ATGGAAACTGAAAGGTCAGTCGGC  | 0   | 41 | RDR2-sensitive |
| ATGGAAGTTTGAGGCGTATCATT   | 25  | 0  | RDR2-resistant |
| ATGGAACAAAGCACGGCCTGACAC  | 0   | 15 | RDR2-sensitive |
| ATGGAACCCCATTTGTCGGTCGGA  | 0   | 28 | RDR2-sensitive |
| ATGGAACCTGTACGACGCGGCCAC  | 0   | 24 | RDR2-sensitive |
| ATGGAAGATGCATCTGTAGATCGA  | 16  | 0  | RDR2-resistant |
| ATGGAAGGTGGAGGTTTTAGGTAT  | 27  | 0  | RDR2-resistant |
| ATGGAATCTTGCTGACGTGGCTGC  | 0   | 10 | RDR2-sensitive |
| ATGGAATCTTTAGAGAAGACTGT   | 1   | 35 | RDR2-sensitive |
| ATGGAATGGACAGCTTGCTTCGGC  | 26  | 1  | RDR2-resistant |
| ATGGAATGTATAAATAATGGCTAA  | 26  | 0  | RDR2-resistant |
| ATGGACAAGCTCATAGGACGACAT  | 0   | 9  | RDR2-sensitive |
| ATGGACACAAGCTGACGACGACGG  | 0   | 84 | RDR2-sensitive |
| ATGGACACAGAAGACATTCTGCAT  | 31  | 0  | RDR2-resistant |
| ATGGACACGTGGAGTAGACGCCAT  | 0   | 12 | RDR2-sensitive |
| ATGGACAGCCGAGCAAGACTAAGA  | 14  | 0  | RDR2-resistant |

|                           |     |    |                |
|---------------------------|-----|----|----------------|
| ATGGACAGGACGGCTCGAGCACAG  | 0   | 15 | RDR2-sensitive |
| ATGGACAGTACGGTCTGAAGGCGG  | 1   | 14 | RDR2-sensitive |
| ATGGACAGTCGACTGAAGATGGCG  | 0   | 15 | RDR2-sensitive |
| ATGGACAGTCTGAACGTATGCAGA  | 0   | 24 | RDR2-sensitive |
| ATGGACCAATTACACGTAGCCGAG  | 0   | 9  | RDR2-sensitive |
| ATGGACCAGATAGTTTGCTTGAC   | 0   | 10 | RDR2-sensitive |
| ATGGACCAGCACTAAGCACGGCAC  | 0   | 9  | RDR2-sensitive |
| ATGGACCATGTCACTTGACGACAC  | 0   | 23 | RDR2-sensitive |
| ATGGACCCGGCTGAAAGACGTACC  | 0   | 64 | RDR2-sensitive |
| ATGGACCGAGCTTGGATCAGCATG  | 0   | 9  | RDR2-sensitive |
| ATGGACCGATCTAGCATGGCTCGA  | 0   | 9  | RDR2-sensitive |
| ATGGACCTCGCGGACGAACGGCTA  | 78  | 20 | RDR2-resistant |
| ATGGACCTGATGGCTTTAATGGCA  | 133 | 24 | RDR2-resistant |
| ATGGACGAACCAGAAGATCTCCAA  | 0   | 11 | RDR2-sensitive |
| ATGGACGAACCAGAAGATCTCCAG  | 0   | 32 | RDR2-sensitive |
| ATGGACGACAGAATCGATCGGTTG  | 0   | 12 | RDR2-sensitive |
| ATGGACGAGCAGACACGACACAGA  | 0   | 14 | RDR2-sensitive |
| ATGGACGAGCAGACACGACACGGA  | 0   | 16 | RDR2-sensitive |
| ATGGACGAGCCGAGCCGAGCCGAG  | 0   | 16 | RDR2-sensitive |
| ATGGACGATCACGGTGGAGGACGA  | 26  | 0  | RDR2-resistant |
| ATGGACGGCGGCGCGTACGGGAAC  | 0   | 11 | RDR2-sensitive |
| ATGGACGGCGGGGAGGGTCGCGCA  | 35  | 0  | RDR2-resistant |
| ATGGACGGTGTACTTAGCATCAAC  | 1   | 30 | RDR2-sensitive |
| ATGGACGTAGGATGGACGGTGGAG  | 0   | 18 | RDR2-sensitive |
| ATGGACTAGTAGCATACCGGTGCG  | 0   | 10 | RDR2-sensitive |
| ATGGACTATCAGCGAAGGGTACCT  | 0   | 26 | RDR2-sensitive |
| ATGGACTCGCGACAGGAGGACCGA  | 0   | 11 | RDR2-sensitive |
| ATGGACTCTCCTCGTCAGCTGGCT  | 24  | 0  | RDR2-resistant |
| ATGGACTCTTGGATGAGGCACTGA  | 86  | 16 | RDR2-resistant |
| ATGGACTGAACGTAGATGGAAGAT  | 0   | 12 | RDR2-sensitive |
| ATGGACTGACACTAAGCACGGCAT  | 0   | 28 | RDR2-sensitive |
| ATGGACTGCGGGATCGGACGGCTG  | 0   | 11 | RDR2-sensitive |
| ATGGACTGCTGGCGCACATCATAC  | 0   | 16 | RDR2-sensitive |
| ATGGACTGGTTAGTGACGGACCAC  | 0   | 9  | RDR2-sensitive |
| ATGGACTGTTTCGCGTTTAAAGGCA | 0   | 20 | RDR2-sensitive |
| ATGGACTTAGAGCCCTGGCGACGG  | 2   | 67 | RDR2-sensitive |
| ATGGACTTAGGGCCCTAGCGACGG  | 2   | 17 | RDR2-sensitive |
| ATGGACTTAGGGCCCTGACGACGG  | 0   | 82 | RDR2-sensitive |
| ATGGACTTAGGGCCCTGGCGACGG  | 0   | 71 | RDR2-sensitive |
| ATGGACTTAGGGCCCTAGCGACGG  | 0   | 28 | RDR2-sensitive |
| ATGGACTTGTCGGCGTACTGCTGT  | 2   | 21 | RDR2-sensitive |
| ATGGACTTGTTTGGCCTCATCGGA  | 18  | 0  | RDR2-resistant |
| ATGGAGAGCAGAACGCAGGGACGA  | 0   | 9  | RDR2-sensitive |
| ATGGAGAGTCGTGTAGAGACGGAC  | 0   | 20 | RDR2-sensitive |
| ATGGAGCATCTGATGTCGGACGAC  | 0   | 13 | RDR2-sensitive |
| ATGGAGGACAGTAGCGCGGTGGTG  | 71  | 14 | RDR2-resistant |
| ATGGAGTATCTGATGTCGGACGAC  | 0   | 11 | RDR2-sensitive |
| ATGGATAAACTCTATTAGGGCGT   | 0   | 16 | RDR2-sensitive |
| ATGGATACAAGCTGACGACGACGG  | 0   | 15 | RDR2-sensitive |

|                           |    |    |                |
|---------------------------|----|----|----------------|
| ATGGATAGAAGATCTTAAAGGTGT  | 39 | 2  | RDR2-resistant |
| ATGGATATTGCTGTGAACCGTCGC  | 0  | 11 | RDR2-sensitive |
| ATGGATATTTGTAGAAGTATCGGA  | 0  | 12 | RDR2-sensitive |
| ATGGATCAGCGACTGCTCCGGCAT  | 0  | 10 | RDR2-sensitive |
| ATGGATCCTATGTCTATATCGTCA  | 34 | 0  | RDR2-resistant |
| ATGGATCGGAGGGGATTGATACGG  | 0  | 14 | RDR2-sensitive |
| ATGGATCTGAACACGTGACGACGC  | 0  | 10 | RDR2-sensitive |
| ATGGATCTGTCCGTGCTTGTGCGG  | 0  | 39 | RDR2-sensitive |
| ATGGATGAACTGCTGGATACGGTC  | 0  | 10 | RDR2-sensitive |
| ATGGATGGACCTGGATGTGCGGAT  | 0  | 10 | RDR2-sensitive |
| ATGGATTAGTGATACTAAGGACTG  | 50 | 6  | RDR2-resistant |
| ATGGATTCGATGCCATAATGGCGA  | 0  | 12 | RDR2-sensitive |
| ATGGATTGAAGTGGATTGATACGG  | 0  | 11 | RDR2-sensitive |
| ATGGATTGAGAGCCTATTCGGTTG  | 0  | 13 | RDR2-sensitive |
| ATGGATTGAGTGGGATTGGATGGG  | 3  | 22 | RDR2-sensitive |
| ATGGATTGCAGCAGTAGTACGATC  | 0  | 11 | RDR2-sensitive |
| ATGGATTGCAGCTGCAGCAGTCCA  | 2  | 32 | RDR2-sensitive |
| ATGGATTGGAGGGGATTGATACGG  | 1  | 23 | RDR2-sensitive |
| ATGGATTGTTTGCAGAGCACCGCC  | 0  | 12 | RDR2-sensitive |
| ATGGATTGTTTTATTTACCCACGG  | 0  | 10 | RDR2-sensitive |
| ATGGATTTGCAGATTTGATGGTTG  | 0  | 14 | RDR2-sensitive |
| ATGGATTTGTATAGGTATGGGTTT  | 0  | 11 | RDR2-sensitive |
| ATGGATTTGTTGATGGATTTAATC  | 0  | 29 | RDR2-sensitive |
| ATGGCAAACGTAGATGGCACCCCTC | 18 | 0  | RDR2-resistant |
| ATGGCAATGTGGCTGGCATGACTG  | 14 | 0  | RDR2-resistant |
| ATGGCACACGCGAGAACACGGGAT  | 0  | 12 | RDR2-sensitive |
| ATGGCACGTACCTACCTGTCCGAT  | 0  | 28 | RDR2-sensitive |
| ATGGCACTCTGACGGAGACTGTCT  | 42 | 9  | RDR2-resistant |
| ATGGCAGAACACGGAATGAGACAG  | 0  | 10 | RDR2-sensitive |
| ATGGCAGACCGTAAGCAGGGACAC  | 0  | 19 | RDR2-sensitive |
| ATGGCATACTGGTGAAGCTCACAA  | 0  | 15 | RDR2-sensitive |
| ATGGCATATGTGTAGATGACTTGA  | 22 | 0  | RDR2-resistant |
| ATGGCCAGTAGATAATGTCAGGCC  | 0  | 16 | RDR2-sensitive |
| ATGGCCAGTTCTCGATTTGTTGTA  | 77 | 2  | RDR2-resistant |
| ATGGCCCCTGAACCTGTTAGTCGT  | 1  | 28 | RDR2-sensitive |
| ATGGCCCCTGGGCCGTCGGACGAC  | 37 | 3  | RDR2-resistant |
| ATGGCCTCCATTTCTCGAATCCC   | 0  | 10 | RDR2-sensitive |
| ATGGCGAGAATGACAGATGACAAG  | 55 | 5  | RDR2-resistant |
| ATGGCGGAACTGACAGGAGCCGAA  | 0  | 11 | RDR2-sensitive |
| ATGGCGTGAGAACTTCAGGAGGTA  | 18 | 0  | RDR2-resistant |
| ATGGCGTGTCTGAGCGACGTAATC  | 21 | 0  | RDR2-resistant |
| ATGGCGTTGAACCATCTCCGTCGG  | 0  | 9  | RDR2-sensitive |
| ATGGCTAGGATCGTTGGCTCGGCG  | 0  | 9  | RDR2-sensitive |
| ATGGCTAGGCTCGTTGGCTCGGCG  | 0  | 40 | RDR2-sensitive |
| ATGGCTAGGTTCTGTTGGCTCGGCG | 0  | 22 | RDR2-sensitive |
| ATGGCTATAGATATTTTTACGGGA  | 0  | 12 | RDR2-sensitive |
| ATGGCTCCTGCTCTAGACGCTAAA  | 0  | 15 | RDR2-sensitive |
| ATGGCTCGACATTGAAGAATGCTG  | 18 | 0  | RDR2-resistant |
| ATGGCTCTGATACCAGTTGTTGGC  | 0  | 10 | RDR2-sensitive |

|                           |    |     |                |
|---------------------------|----|-----|----------------|
| ATGGCTGCAGAGGATCGTTGTCGT  | 0  | 9   | RDR2-sensitive |
| ATGGCTGTACGAACTAACGGCTAA  | 0  | 12  | RDR2-sensitive |
| ATGGCTTAGTGTGACACAGGGGCG  | 0  | 9   | RDR2-sensitive |
| ATGGCTTATACCCGCTCTCGTCGT  | 0  | 13  | RDR2-sensitive |
| ATGGCTTCAGCTCTGGCAGTAGAC  | 2  | 18  | RDR2-sensitive |
| ATGGCTTCCAAAATATCAGGACTG  | 0  | 12  | RDR2-sensitive |
| ATGGCTTGCTTGGCTGTGGGTCGT  | 0  | 15  | RDR2-sensitive |
| ATGGCTTGGGTCGATCTGACATGA  | 0  | 12  | RDR2-sensitive |
| ATGGCTTGTAGTCGGACATGTCAG  | 2  | 26  | RDR2-sensitive |
| ATGGCTTTCCTGGACACATGGCAC  | 0  | 9   | RDR2-sensitive |
| ATGGGAATGGCAGAACACGGAATG  | 0  | 12  | RDR2-sensitive |
| ATGGGACAGCGACCAGCACGACGG  | 0  | 15  | RDR2-sensitive |
| ATGGGACATGCATGGGCACGGCAC  | 0  | 13  | RDR2-sensitive |
| ATGGGACCAGTGAAGCGGACGCA   | 14 | 0   | RDR2-resistant |
| ATGGGACCGTAGTAAAGCCTCGGA  | 0  | 9   | RDR2-sensitive |
| ATGGGACCTTCGACGACGAAGCAT  | 0  | 12  | RDR2-sensitive |
| ATGGGACCTTCGGCGATGAAGCAG  | 0  | 9   | RDR2-sensitive |
| ATGGGACTGAGGGCATACTTGCAA  | 0  | 9   | RDR2-sensitive |
| ATGGGACTGGATATGCGGGCGCAG  | 0  | 10  | RDR2-sensitive |
| ATGGGAGGCAGAACGGCAGAACGC  | 1  | 14  | RDR2-sensitive |
| ATGGGAGGCTGTAGTGAGGCTTCA  | 0  | 15  | RDR2-sensitive |
| ATGGGAGTGGCACGAGAGGATGGT  | 0  | 9   | RDR2-sensitive |
| ATGGGATGTTGTTGAGTATGGTGT  | 31 | 2   | RDR2-resistant |
| ATGGGATTGCGGCATTTTTCTCTA  | 59 | 0   | RDR2-resistant |
| ATGGGCAACAGAGAACATACCCAC  | 0  | 12  | RDR2-sensitive |
| ATGGGCAGAACGCGGAATGGCCGA  | 0  | 11  | RDR2-sensitive |
| ATGGGCATAGATATTTTTACGGG   | 0  | 21  | RDR2-sensitive |
| ATGGGCCGGCACTAAGCACGACAC  | 0  | 15  | RDR2-sensitive |
| ATGGGCCGAACCCTCAGTGGACTTC | 15 | 0   | RDR2-resistant |
| ATGGGCGACCGAACTCTCCGGCTA  | 21 | 1   | RDR2-resistant |
| ATGGGCTAAACGGGCTAAACGGGC  | 0  | 10  | RDR2-sensitive |
| ATGGGCTACGATACCGCTGTGTAT  | 0  | 14  | RDR2-sensitive |
| ATGGGCTGACCGGGCTACAGGCAC  | 0  | 30  | RDR2-sensitive |
| ATGGGCTGATCGGGCTACAGGCAC  | 0  | 17  | RDR2-sensitive |
| ATGGGCTGCGCGCGGTAGAATGAA  | 0  | 9   | RDR2-sensitive |
| ATGGGCTGGATCTGTTTCGGGCTG  | 0  | 16  | RDR2-sensitive |
| ATGGGCTGTCTCCAGTGGACCCAT  | 0  | 15  | RDR2-sensitive |
| ATGGGCTGTCTGATAGGCTTCGGC  | 2  | 101 | RDR2-sensitive |
| ATGGGGATGTAAGCGGAGACTCAT  | 0  | 10  | RDR2-sensitive |
| ATGGGGCACTGTAGGAGGCACCGC  | 0  | 9   | RDR2-sensitive |
| ATGGGGCGGCATGGACACATTCTC  | 29 | 0   | RDR2-resistant |
| ATGGGGCTGTAGGGGGCACTCCAC  | 2  | 33  | RDR2-sensitive |
| ATGGGGGCTGTAGGGGGCACTCCA  | 1  | 19  | RDR2-sensitive |
| ATGGGTCCGATGGCATACTGACGA  | 0  | 20  | RDR2-sensitive |
| ATGGGTCCGATGGCATACTGGCGA  | 0  | 31  | RDR2-sensitive |
| ATGGGTCGGCGCGAGACGGAACAC  | 2  | 19  | RDR2-sensitive |
| ATGGGTCGGCGCGAGACGGAGCAC  | 3  | 38  | RDR2-sensitive |
| ATGGGTCGGCGCGAGACGGAGCGC  | 0  | 17  | RDR2-sensitive |
| ATGGGTCGGCTCGAAGAACGGCTC  | 0  | 12  | RDR2-sensitive |

|                           |     |    |                |
|---------------------------|-----|----|----------------|
| ATGGGTCGGGCTGGGACCAGAGGA  | 0   | 12 | RDR2-sensitive |
| ATGGGTCGGGCTTAGACCGGCATA  | 0   | 13 | RDR2-sensitive |
| ATGGGTCGTGTCGGATCGGAGGCA  | 0   | 13 | RDR2-sensitive |
| ATGGGTCGTGTCTGGCGAGCCGGC  | 0   | 13 | RDR2-sensitive |
| ATGGGTCTGCACCGGTTGAGACGC  | 0   | 11 | RDR2-sensitive |
| ATGGGTGAAGGCCGAACGTTCTAA  | 0   | 11 | RDR2-sensitive |
| ATGGGTTGGCTTTGGCATCGTCGT  | 0   | 12 | RDR2-sensitive |
| ATGGGTTGTATATGGTTGACAGGT  | 23  | 2  | RDR2-resistant |
| ATGGTAATGGGTTGTATATGGTTG  | 44  | 0  | RDR2-resistant |
| ATGGTACACTACACATGGTCCGAC  | 0   | 15 | RDR2-sensitive |
| ATGGTACGTGTAGAAGCATGTCGG  | 0   | 11 | RDR2-sensitive |
| ATGGTACGTGTAGGAGCATGTCGG  | 0   | 16 | RDR2-sensitive |
| ATGGTAGAATAAGCGGGCGGGCTT  | 0   | 14 | RDR2-sensitive |
| ATGGTAGACGTGAGCAGCATGAGT  | 0   | 9  | RDR2-sensitive |
| ATGGTAGACTGATTGATGATTGCA  | 83  | 1  | RDR2-resistant |
| ATGGTAGACTGTACGGTGACCTAC  | 0   | 21 | RDR2-sensitive |
| ATGGTAGAGGAGGCAGTAGAGTGA  | 0   | 11 | RDR2-sensitive |
| ATGGTAGATTCAGATGAAGACTGT  | 44  | 1  | RDR2-resistant |
| ATGGTAGGGCTGACGCGGTGCCGA  | 0   | 12 | RDR2-sensitive |
| ATGGTCAAACGGACGATTCGGCAC  | 0   | 15 | RDR2-sensitive |
| ATGGTCAAGTTACATGTCGGATAA  | 1   | 48 | RDR2-sensitive |
| ATGGTCACAGGCAGGAACCTTAGGC | 0   | 15 | RDR2-sensitive |
| ATGGTCAGGAGATATAGCAATTTT  | 15  | 0  | RDR2-resistant |
| ATGGTCATAAAATGTGAAGTCGTG  | 0   | 11 | RDR2-sensitive |
| ATGGTCCCGTTAGGCCCGTCGGGC  | 0   | 9  | RDR2-sensitive |
| ATGGTCTGGCTGTAGCTTGCAGGA  | 0   | 21 | RDR2-sensitive |
| ATGGTCTGTTTAGAGTGAGGCTAG  | 0   | 69 | RDR2-sensitive |
| ATGGTCTTTTGTTCAGGTGTGAC   | 15  | 0  | RDR2-resistant |
| ATGGTGACCTCGACAAGCAGCTTG  | 49  | 2  | RDR2-resistant |
| ATGGTGAGCTTTGGCAGACTGGT   | 0   | 13 | RDR2-sensitive |
| ATGGTGAGGATGACTGGTGACGCA  | 0   | 13 | RDR2-sensitive |
| ATGGTGAGGATGAGGATGACGGGT  | 0   | 21 | RDR2-sensitive |
| ATGGTGATTTGGATTCGAAATCGG  | 17  | 1  | RDR2-resistant |
| ATGGTGCACGATATGGACGTCTAC  | 0   | 9  | RDR2-sensitive |
| ATGGTGGAGCCGATCAGTGACGTG  | 18  | 0  | RDR2-resistant |
| ATGGTGGCAGAACACGGGAATGAC  | 0   | 10 | RDR2-sensitive |
| ATGGTGTCAAGCGGCGTATCCTAT  | 15  | 0  | RDR2-resistant |
| ATGGTTAACTCGGAAGATGCTGCT  | 0   | 11 | RDR2-sensitive |
| ATGGTTACTGTTTGATATCCACGG  | 4   | 46 | RDR2-sensitive |
| ATGGTTAGGTGCAGTAGATGTGTA  | 82  | 7  | RDR2-resistant |
| ATGGTTATGTGACTGATTATGGTG  | 416 | 40 | RDR2-resistant |
| ATGGTTGATGACATACTGACGAA   | 0   | 10 | RDR2-sensitive |
| ATGGTTGCGCTGCTTCGATGGCAA  | 0   | 36 | RDR2-sensitive |
| ATGGTTGCGTCAATGCAACGGATG  | 31  | 0  | RDR2-resistant |
| ATGGTTGCTTCCGGTGATTGACGT  | 0   | 12 | RDR2-sensitive |
| ATGGTTGACTTAGAATCGATAGGC  | 0   | 21 | RDR2-sensitive |
| ATGGTTGAGGATCTAGACGACTAT  | 52  | 0  | RDR2-resistant |
| ATGGTTGATGGTGTGACTTGGCCT  | 1   | 13 | RDR2-sensitive |
| ATGGTTGCGGAGGATCGTTGTCGT  | 0   | 13 | RDR2-sensitive |

|                           |     |    |                |
|---------------------------|-----|----|----------------|
| ATGGTTGGTCGCTATAGATGTCGT  | 0   | 18 | RDR2-sensitive |
| ATGGTTGTAGGCCTGACCACGGAC  | 0   | 11 | RDR2-sensitive |
| ATGGTTGTGGAGGCTACGCAGTAC  | 0   | 17 | RDR2-sensitive |
| ATGGTTGTTGTTTCATTCGCGGTT  | 41  | 0  | RDR2-resistant |
| ATGGTTTCGTGTTAGCTTCAGGCA  | 20  | 1  | RDR2-resistant |
| ATGGTTTTGTAGATAGCATGGTAT  | 0   | 16 | RDR2-sensitive |
| ATGTAAACTTTGTAGCAGAGCTGC  | 0   | 17 | RDR2-sensitive |
| ATGTAAATCTTTCAACGGGACTGC  | 1   | 16 | RDR2-sensitive |
| ATGTAAGTGAGATAGTAATGGTAT  | 0   | 12 | RDR2-sensitive |
| ATGTACAATTTATGCTCTGTCCGT  | 0   | 12 | RDR2-sensitive |
| ATGTACCGTAAAGGCACGCGTCGG  | 0   | 23 | RDR2-sensitive |
| ATGTACCTGTAGTACTTGTGCAGA  | 37  | 5  | RDR2-resistant |
| ATGTACGAGGGAACCTTCTACCGGC | 0   | 18 | RDR2-sensitive |
| ATGTACGCGAGGAACGATGGCTGC  | 0   | 28 | RDR2-sensitive |
| ATGTACGCTCTGCTGAATATGGTC  | 0   | 13 | RDR2-sensitive |
| ATGTAGAACAGGACTGTCTGCGGC  | 0   | 17 | RDR2-sensitive |
| ATGTAGAATAATGATGGATATTGG  | 3   | 16 | RDR2-sensitive |
| ATGTAGAATGACAGAACGCGGAAT  | 0   | 9  | RDR2-sensitive |
| ATGTAGAATTTGTATGCAAGCAAG  | 251 | 20 | RDR2-resistant |
| ATGTAGACTCCAGAAGCCGTTCCG  | 0   | 10 | RDR2-sensitive |
| ATGTAGACTCCTATGGCGTTGTCA  | 102 | 4  | RDR2-resistant |
| ATGTAGAGCTGTACGGGCATCAAC  | 0   | 17 | RDR2-sensitive |
| ATGTAGAGGAGTAGCACATCCGGT  | 0   | 12 | RDR2-sensitive |
| ATGTAGAGGGCGCTGTATGGGTAC  | 0   | 9  | RDR2-sensitive |
| ATGTAGAGTGCATCAGACGCCGGA  | 78  | 1  | RDR2-resistant |
| ATGTAGCGGCTGAAGCAGAGACTC  | 1   | 29 | RDR2-sensitive |
| ATGTAGCTGGTGGTGGATGGACAT  | 0   | 20 | RDR2-sensitive |
| ATGTAGGACAACGTCGTTGATGAT  | 0   | 9  | RDR2-sensitive |
| ATGTAGGACCGGATGTAGGGACGT  | 0   | 12 | RDR2-sensitive |
| ATGTAGGACTGCTTCCAGAGGTCG  | 0   | 12 | RDR2-sensitive |
| ATGTAGGACTGTGCAGGCCCGGCC  | 1   | 19 | RDR2-sensitive |
| ATGTAGGCAGTGGCGGAGCTCCGT  | 0   | 10 | RDR2-sensitive |
| ATGTAGGCCTCCGAGTTGGACGAG  | 0   | 11 | RDR2-sensitive |
| ATGTAGTGGCTCAGGACAAGACGA  | 0   | 23 | RDR2-sensitive |
| ATGTAGTTCTCCGGCGGCGTCTAG  | 0   | 9  | RDR2-sensitive |
| ATGTAGTTGCACGGGCTTTTGAAC  | 14  | 0  | RDR2-resistant |
| ATGTAGTTGGTAGACGGTTCTCAT  | 0   | 62 | RDR2-sensitive |
| ATGTATCAACTCTGTCTTGAGCAT  | 0   | 10 | RDR2-sensitive |
| ATGTATTGGGTGGGATTGAGCCGG  | 0   | 15 | RDR2-sensitive |
| ATGTATTTTCTGTGATCTTCGGGC  | 0   | 9  | RDR2-sensitive |
| ATGTCAAGTTACTGCGGTATTCAA  | 93  | 13 | RDR2-resistant |
| ATGTCACTCTCTCGTATCGTCGTC  | 0   | 9  | RDR2-sensitive |
| ATGTCAGACTGACCTAGATTGGCC  | 0   | 26 | RDR2-sensitive |
| ATGTCAGAGGCAGAACGGCAGACT  | 0   | 11 | RDR2-sensitive |
| ATGTCAGAGGTAGGCTACTATTGC  | 0   | 11 | RDR2-sensitive |
| ATGTCAGTACTTGTGGTTGTTGGA  | 1   | 33 | RDR2-sensitive |
| ATGTCATATTAGATGTGTCCGGCGT | 76  | 2  | RDR2-resistant |
| ATGTCATCCGACGGCATGTCTACT  | 159 | 0  | RDR2-resistant |
| ATGTCATGTTGAGCTTAGATGGTT  | 0   | 43 | RDR2-sensitive |

|                           |     |     |                |
|---------------------------|-----|-----|----------------|
| ATGTCCAACGACTGTTAGACGGGC  | 1   | 28  | RDR2-sensitive |
| ATGTCCAATAGGTCGTGTCGGCAT  | 0   | 17  | RDR2-sensitive |
| ATGTCCACTGTAGAGGCATACTGG  | 0   | 11  | RDR2-sensitive |
| ATGTCCGACGGCATCGTAGACAGC  | 4   | 177 | RDR2-sensitive |
| ATGTCCGACGGCATTAACTATCT   | 1   | 12  | RDR2-sensitive |
| ATGTCCGACGGCATTAACTTATCT  | 1   | 40  | RDR2-sensitive |
| ATGTCCGACGGCCCTGTACGAGGC  | 1   | 18  | RDR2-sensitive |
| ATGTCCGACGGCCTGCGCTTATGT  | 0   | 9   | RDR2-sensitive |
| ATGTCCGACGGCTACGCTGACAGC  | 0   | 29  | RDR2-sensitive |
| ATGTCCGACGGCTGAAGGCTGGTA  | 0   | 12  | RDR2-sensitive |
| ATGTCCGACGGCTGCCTAGGAGAC  | 0   | 14  | RDR2-sensitive |
| ATGTCCGACGGCTGTAATACGGGC  | 0   | 12  | RDR2-sensitive |
| ATGTCCGACGGCTGTCAGACGGGC  | 0   | 13  | RDR2-sensitive |
| ATGTCCGACGGCTGTCAGATGGGC  | 0   | 18  | RDR2-sensitive |
| ATGTCCGACGGCTGTCTTGGGCC   | 0   | 9   | RDR2-sensitive |
| ATGTCCGACGGTCCTGTAGGAGGC  | 4   | 195 | RDR2-sensitive |
| ATGTCCGACGGTTCTGTACGAGGC  | 0   | 17  | RDR2-sensitive |
| ATGTCCGACGGTTGCCTATGGGGC  | 0   | 11  | RDR2-sensitive |
| ATGTCCGATGGCTGTCAGACAGGC  | 0   | 13  | RDR2-sensitive |
| ATGTCCGGAATGAGTGAAGGGCT   | 0   | 23  | RDR2-sensitive |
| ATGTCCTCCGCATGTCTTGACTGT  | 0   | 9   | RDR2-sensitive |
| ATGTCGAGTCTGGGCTTTTCGGCA  | 0   | 13  | RDR2-sensitive |
| ATGTCGCGTAGGACAGTTCGGCAA  | 4   | 61  | RDR2-sensitive |
| ATGTCGCGTAGGACAGTTCGGCTA  | 1   | 39  | RDR2-sensitive |
| ATGTCGCGTAGGACAGTTCGGCTT  | 0   | 34  | RDR2-sensitive |
| ATGTCGGCTGTAGGGGCACCCTAT  | 0   | 14  | RDR2-sensitive |
| ATGTCGGCTGTAGGGGCATCCTAT  | 0   | 14  | RDR2-sensitive |
| ATGTCGGCTGTAGGGGGCACCCCTA | 0   | 22  | RDR2-sensitive |
| ATGTCGTACGGGCACACAGAGCGG  | 16  | 0   | RDR2-resistant |
| ATGTCGTAAGGACGGTCCTATAT   | 0   | 15  | RDR2-sensitive |
| ATGTCGTGACCCATGGGCGGGCAT  | 0   | 16  | RDR2-sensitive |
| ATGTCGTGAGTTTCTGGTGGTCAT  | 0   | 9   | RDR2-sensitive |
| ATGTCGTGCGTAGTGTGCGCCCAT  | 0   | 26  | RDR2-sensitive |
| ATGTCTACTGTACTGGCACTCGGC  | 1   | 23  | RDR2-sensitive |
| ATGTCTAGACTGTTGGGATGGCAA  | 0   | 9   | RDR2-sensitive |
| ATGTCTAGATCGTGCCGGACCGGC  | 0   | 10  | RDR2-sensitive |
| ATGTCTAGATCGTGCCGGGCCGGC  | 0   | 22  | RDR2-sensitive |
| ATGTCTAGATTGTATCGGTGCGTG  | 0   | 18  | RDR2-sensitive |
| ATGTCTAGCATGTCGTCCTCGGAT  | 108 | 7   | RDR2-resistant |
| ATGTCTATAGGCTCTTAAGGCGC   | 25  | 4   | RDR2-resistant |
| ATGTCTGACGGCTGTGAGACGGGC  | 0   | 12  | RDR2-sensitive |
| ATGTCTGCTAGACGGTTGGCCCTG  | 1   | 18  | RDR2-sensitive |
| ATGTCTGGACCAGGTTGACGGAT   | 0   | 14  | RDR2-sensitive |
| ATGTCTGGACCGATGTATAGGCAC  | 0   | 33  | RDR2-sensitive |
| ATGTCTGGGCCTAGGGACCGGCAC  | 0   | 53  | RDR2-sensitive |
| ATGTCTGTGTGCTTTGTACGGCTG  | 0   | 26  | RDR2-sensitive |
| ATGTCTGTTGACCTGTTCTGACGG  | 0   | 21  | RDR2-sensitive |
| ATGTCTGTTGGATGGTTTGATAGA  | 75  | 0   | RDR2-resistant |
| ATGTCTGTTTATTTGGTCTTCTT   | 37  | 0   | RDR2-resistant |

|                           |    |    |                |
|---------------------------|----|----|----------------|
| ATGTCTTCAGTTAGCGTGTCCGGTA | 48 | 0  | RDR2-resistant |
| ATGTCTTGACGTGTGGGATGGCAC  | 0  | 34 | RDR2-sensitive |
| ATGTCTTGATGAATTCCACGGCC   | 72 | 13 | RDR2-resistant |
| ATGTCTTTTACAAATCGTTTGGCA  | 0  | 15 | RDR2-sensitive |
| ATGTGAACTACTGGACACGGTATA  | 1  | 14 | RDR2-sensitive |
| ATGTGAACTCTTGGTTTTGATGGT  | 0  | 11 | RDR2-sensitive |
| ATGTGACCTGGTCCAGGCTGACGC  | 0  | 20 | RDR2-sensitive |
| ATGTGACGTAGATGTTGTGGCTAG  | 0  | 18 | RDR2-sensitive |
| ATGTGACTGATTCTACAACAGAAG  | 22 | 0  | RDR2-resistant |
| ATGTGAGCTAGGACCGCTGAAGAC  | 0  | 9  | RDR2-sensitive |
| ATGTGATTTGGCATTGACTCCTT   | 33 | 0  | RDR2-resistant |
| ATGTGCACACGTGGATCGTCCGGC  | 0  | 11 | RDR2-sensitive |
| ATGTGCACTATGTAGAAGACCGTA  | 0  | 9  | RDR2-sensitive |
| ATGTGCGCCGGGCTGAGCAGGCAG  | 0  | 9  | RDR2-sensitive |
| ATGTGCTCCGAATCGGCGTGGCTT  | 21 | 1  | RDR2-resistant |
| ATGTGCTGGTTCTGACTCGGGCGG  | 0  | 14 | RDR2-sensitive |
| ATGTGGAACCTTTGGAAGGAGCGC  | 1  | 29 | RDR2-sensitive |
| ATGTGGAACCTGGAGGAGGCGACGC | 0  | 9  | RDR2-sensitive |
| ATGTGGAAGCGTTATACTGTCTGT  | 0  | 9  | RDR2-sensitive |
| ATGTGGACCTTTGGTGGCTGTTCT  | 0  | 16 | RDR2-sensitive |
| ATGTGGACGCTATGATGCATGGAC  | 0  | 20 | RDR2-sensitive |
| ATGTGGACGCTGAGGAGGTGGCTC  | 23 | 0  | RDR2-resistant |
| ATGTGGACGTGCATGTGGACGTGC  | 0  | 9  | RDR2-sensitive |
| ATGTGGAGACTTGGAGACGTGCGC  | 0  | 33 | RDR2-sensitive |
| ATGTGGCACTCGGCAAAGACTGAC  | 0  | 10 | RDR2-sensitive |
| ATGTGGCACTGTCGTTTGGGTCAT  | 33 | 2  | RDR2-resistant |
| ATGTGGCGCTGACGGGACGTTCTA  | 0  | 13 | RDR2-sensitive |
| ATGTGGCTGTACGGACGCGGATGG  | 0  | 9  | RDR2-sensitive |
| ATGTGGGACCGTCTGACACGGCAC  | 0  | 13 | RDR2-sensitive |
| ATGTGGGCCTGGCACTGAGGACAG  | 0  | 15 | RDR2-sensitive |
| ATGTGGGCTGTACTTTAGGGGTGT  | 0  | 13 | RDR2-sensitive |
| ATGTGGTTTATTATAGTTGGATAA  | 36 | 0  | RDR2-resistant |
| ATGTGTACCACTCTGGGCCGGCGT  | 1  | 41 | RDR2-sensitive |
| ATGTGTACGGTCTGGGCTATTAAC  | 0  | 9  | RDR2-sensitive |
| ATGTGTAGTCCCTGAACTTGGCAT  | 0  | 71 | RDR2-sensitive |
| ATGTGTAGTGTGATGATCTGGGTA  | 33 | 0  | RDR2-resistant |
| ATGTGTAGTGTGATGATCTGGGTT  | 55 | 0  | RDR2-resistant |
| ATGTGTAGTGTGATGGTCTGGGTA  | 43 | 7  | RDR2-resistant |
| ATGTGTAGTGTGATGGTCTGGGTT  | 55 | 3  | RDR2-resistant |
| ATGTGTCCAGGATGAAGATAGTT   | 39 | 1  | RDR2-resistant |
| ATGTGTCGTA CTGTTATGAGATGG | 0  | 21 | RDR2-sensitive |
| ATGTGTCGTCGCAACGCACGGGCA  | 0  | 33 | RDR2-sensitive |
| ATGTGTGGACGAGGTAGCGAAGGC  | 15 | 0  | RDR2-resistant |
| ATGTGTTGACTAAGTGACGGACAC  | 0  | 29 | RDR2-sensitive |
| ATGTGTTGGACCATCTAAAGGTGA  | 26 | 2  | RDR2-resistant |
| ATGTGTTTCGTTGTGATGACTGCA  | 0  | 9  | RDR2-sensitive |
| ATGTGTTTGACATGATCTGGGAAA  | 35 | 0  | RDR2-resistant |
| ATGTGTTTGTTGCTTGGATGTGA   | 0  | 13 | RDR2-sensitive |
| ATGTGTTTGTTTCGGAACGACGT   | 0  | 21 | RDR2-sensitive |



|                            |     |    |                |
|----------------------------|-----|----|----------------|
| ATGTGTTTTTAGGAGTAGGACGGT   | 0   | 12 | RDR2-sensitive |
| ATGTTAAAATAGAATTGTTGGTA    | 23  | 0  | RDR2-resistant |
| ATGTTACGTCGGCGCTACAGTTGT   | 0   | 12 | RDR2-sensitive |
| ATGTTAGACTGCCTGCAACGGTGC   | 2   | 32 | RDR2-sensitive |
| ATGTTCAAGACAAGAGGATTGGATA  | 0   | 12 | RDR2-sensitive |
| ATGTTCAAGTAGATCGTGTGTATAA  | 0   | 17 | RDR2-sensitive |
| ATGTTCCCAGGCTATTTTCGTCCG   | 0   | 9  | RDR2-sensitive |
| ATGTTCCGGACTTCAAACGGTGTG   | 0   | 15 | RDR2-sensitive |
| ATGTTCCGACGACTTTCCTTGACGGT | 0   | 32 | RDR2-sensitive |
| ATGTTCCGAGACAGGAGACTAGCTG  | 1   | 24 | RDR2-sensitive |
| ATGTTCCGATGACTGGCATGTAAGC  | 0   | 11 | RDR2-sensitive |
| ATGTTCCGATGACTTATCTGACGGC  | 0   | 36 | RDR2-sensitive |
| ATGTTCCGACGCTCAGAAAGGCTT   | 144 | 13 | RDR2-resistant |
| ATGTTCCGTCGCTGGAGGGGGGCCT  | 2   | 21 | RDR2-sensitive |
| ATGTTCCGTTCCGAGCATGAGGCTA  | 0   | 16 | RDR2-sensitive |
| ATGTTCTGTGTGATATAATGGCAT   | 0   | 9  | RDR2-sensitive |
| ATGTTCTTAGAACACATGTTGGTA   | 44  | 1  | RDR2-resistant |
| ATGTTCTTGATTGGTCGGTCAAAC   | 46  | 0  | RDR2-resistant |
| ATGTTGAAGCTCTGCATTGACGTC   | 219 | 0  | RDR2-resistant |
| ATGTTGACATGGAAAGTTTGAGGC   | 44  | 0  | RDR2-resistant |
| ATGTTGCGCTGACTGTTGGATGGA   | 0   | 10 | RDR2-sensitive |
| ATGTTGCGTTGGATATGTGGGCAT   | 0   | 10 | RDR2-sensitive |
| ATGTTGCTGGATTCTCAAGACGTG   | 40  | 3  | RDR2-resistant |
| ATGTTGGACGGGCCGGCTCGGTAC   | 0   | 9  | RDR2-sensitive |
| ATGTTGGACTAGCGTGCGTGCCGT   | 0   | 15 | RDR2-sensitive |
| ATGTTGGACTTGCAGGGTTGGCCT   | 0   | 16 | RDR2-sensitive |
| ATGTTGGATAAAATGGCGTGAGAA   | 90  | 5  | RDR2-resistant |
| ATGTTGGCTAGAATGTAGAAGGCT   | 1   | 33 | RDR2-sensitive |
| ATGTTGGGCTTTTTACCGTTAGG    | 28  | 3  | RDR2-resistant |
| ATGTTGGGGCGAAGGCAAAGACGC   | 0   | 15 | RDR2-sensitive |
| ATGTTGTAAGTAGATAGGCATGTCC  | 19  | 0  | RDR2-resistant |
| ATGTTGTCCGGTGCAGAGAGGCAGA  | 0   | 10 | RDR2-sensitive |
| ATGTTGTCTGGCTCGAGGTGCAGA   | 17  | 0  | RDR2-resistant |
| ATGTTGTTTTACATCACAGTCGGT   | 2   | 20 | RDR2-sensitive |
| ATGTTTAGAGCATTTTTTGTAGGA   | 14  | 0  | RDR2-resistant |
| ATGTTTAGAGTTCGTCGTACGTCC   | 0   | 15 | RDR2-sensitive |
| ATGTTTATGAACTGTAGGTGCATG   | 0   | 9  | RDR2-sensitive |
| ATGTTTCTTTCTGACTGTCCGGCGT  | 0   | 9  | RDR2-sensitive |
| ATGTTTGAATGTATGTAATGGCAC   | 0   | 16 | RDR2-sensitive |
| ATGTTTGACGATGGACAGCGCGGT   | 0   | 9  | RDR2-sensitive |
| ATGTTTGACTGTCCGCTGCCTTTG   | 34  | 5  | RDR2-resistant |
| ATGTTTGGACTGACACCTACGGCG   | 0   | 9  | RDR2-sensitive |
| ATGTTTGGATGCTTGGATGGTCAC   | 0   | 16 | RDR2-sensitive |
| ATGTTTGGGCTCAGACTTCGGCTC   | 0   | 14 | RDR2-sensitive |
| ATGTTTGGGTCCGACGGCCAGGCAC  | 0   | 34 | RDR2-sensitive |
| ATGTTTGGTTGACTGTACATGGTA   | 0   | 26 | RDR2-sensitive |
| ATGTTTGGTTGACTGTACGTGGTA   | 0   | 64 | RDR2-sensitive |
| ATGTTTGGTTGACTGTATTTGGTT   | 0   | 44 | RDR2-sensitive |
| ATGTTTGTGACGGACGAGTTGGCT   | 0   | 14 | RDR2-sensitive |

|                             |    |    |                |
|-----------------------------|----|----|----------------|
| ATGTTTGTGCATTCTGTAGGCGGT    | 1  | 13 | RDR2-sensitive |
| ATGTTTGTCTGTAGATCCGTGCG     | 1  | 25 | RDR2-sensitive |
| ATGTTTGTGGCTAGATTTGCGGA     | 23 | 73 | RDR2-sensitive |
| ATGTTTTAGGATGTCGAAACGGT     | 0  | 11 | RDR2-sensitive |
| ATGTTTTCGTTGGGCTGTGACGGT    | 0  | 9  | RDR2-sensitive |
| ATGTTTTCTGAACAGGTCTGGCAC    | 0  | 85 | RDR2-sensitive |
| ATGTTTTTACTGTATGTCGGGT      | 0  | 12 | RDR2-sensitive |
| ATTAAACGGATCGTGCTTCGGGCC    | 0  | 35 | RDR2-sensitive |
| ATTAAAGGTTTTTATTCGGACAAA    | 25 | 3  | RDR2-resistant |
| ATTAAAGTTTATGGTCGCTTCGGC    | 0  | 21 | RDR2-sensitive |
| ATTAAATAGGTCGTGGATTAGCAT    | 0  | 10 | RDR2-sensitive |
| ATTAAACGGCAGAACGGCAGAACGG   | 0  | 17 | RDR2-sensitive |
| ATTAAACGGGCTGGACCGACACGGC   | 0  | 9  | RDR2-sensitive |
| ATTAAACGGGCTTAGAGTTAAACGG   | 0  | 9  | RDR2-sensitive |
| ATTAACTATGTCGGGCCGGCCCAT    | 0  | 10 | RDR2-sensitive |
| ATTAACTGTCCACTCTGCAACGGC    | 0  | 10 | RDR2-sensitive |
| ATTAAAGACTGGGCATATTA CTGCGC | 0  | 12 | RDR2-sensitive |
| ATTAAAGACTGTAAGGGGTAGGCTG   | 0  | 15 | RDR2-sensitive |
| ATTAAAGACTGTAAGGGTAGCCTAC   | 0  | 14 | RDR2-sensitive |
| ATTAAAGGATGGACTTGGCTTCAAG   | 20 | 2  | RDR2-resistant |
| ATTAAAGGCTGTAAGAGTAGTCGGC   | 0  | 17 | RDR2-sensitive |
| ATTAAAGGCTGTAAGGGGTAGCATG   | 0  | 10 | RDR2-sensitive |
| ATTAAAGGCTGTAAGGGGTAGGCTG   | 0  | 14 | RDR2-sensitive |
| ATTAAATAGGGACAGTCGGGGGCAT   | 28 | 1  | RDR2-resistant |
| ATTAAATTGGATATTCGGATTTCGGA  | 23 | 0  | RDR2-resistant |
| ATTACACTCTGTAGGAAATGCATA    | 0  | 10 | RDR2-sensitive |
| ATTACATGTGGAACAGCACGTGCG    | 0  | 14 | RDR2-sensitive |
| ATTACCTCGGCTGACTGACGGTTC    | 0  | 64 | RDR2-sensitive |
| ATTACGCTGATAGAAAGATTGTCC    | 15 | 0  | RDR2-resistant |
| ATTACTATGTGATGTGGACCTTAT    | 30 | 0  | RDR2-resistant |
| ATTACTGTTGAAGACATATTTGCT    | 55 | 1  | RDR2-resistant |
| ATTACTTGAACATGGTCGACGGCA    | 0  | 9  | RDR2-sensitive |
| ATTACTTGGGCTGCATATGGAGAT    | 15 | 0  | RDR2-resistant |
| ATTAGAATTTATGGTCGCTTCGGC    | 0  | 15 | RDR2-sensitive |
| ATTAGAATTTATGGTCGTTTCGGC    | 0  | 14 | RDR2-sensitive |
| ATTAGACATACTGATAGATGGCGC    | 0  | 13 | RDR2-sensitive |
| ATTAGACGGAACCGGGCAGAACGC    | 0  | 10 | RDR2-sensitive |
| ATTAGACGGATGGATTGGATGCAT    | 0  | 11 | RDR2-sensitive |
| ATTAGACTTACTGATAGATGGCAC    | 2  | 18 | RDR2-sensitive |
| ATTAGACTTACTGATCGATGGCAC    | 6  | 79 | RDR2-sensitive |
| ATTAGACTTACTGATTGTTGGCGC    | 4  | 46 | RDR2-sensitive |
| ATTAGAGTTTACGGTCGTTTCGGC    | 0  | 31 | RDR2-sensitive |
| ATTAGAGTTTACGGTCGTTTCGGT    | 0  | 12 | RDR2-sensitive |
| ATTAGAGTTTATGATCGCTTCGGC    | 0  | 26 | RDR2-sensitive |
| ATTAGAGTTTATGATCGTTTCGGC    | 0  | 26 | RDR2-sensitive |
| ATTAGAGTTTATGGTCGCTTCGGC    | 0  | 12 | RDR2-sensitive |
| ATTAGAGTTTATGGTCGTTTCGGT    | 1  | 25 | RDR2-sensitive |
| ATTAGCAACGGACGGTCGGTCGCT    | 5  | 33 | RDR2-sensitive |
| ATTAGCACCTGCAGAACATCGGCG    | 1  | 13 | RDR2-sensitive |

|                           |     |    |                |
|---------------------------|-----|----|----------------|
| ATTAGCATTGGTGGTAGTAAGTAT  | 23  | 1  | RDR2-resistant |
| ATTAGCGTCAGGAGGTCGGCCAC   | 21  | 0  | RDR2-resistant |
| ATTAGCTATCGGACGTAACAGGCC  | 0   | 11 | RDR2-sensitive |
| ATTAGCTATGATGTTTGGATGTTT  | 30  | 0  | RDR2-resistant |
| ATTAGGACGCGCAATTACAGTAT   | 0   | 13 | RDR2-sensitive |
| ATTAGGATTCCTGTAGTGTGGCA   | 0   | 13 | RDR2-sensitive |
| ATTAGGGGACGGGTATGGGACTAA  | 0   | 13 | RDR2-sensitive |
| ATTAGGGGGACTGTAGTGAGGCTC  | 0   | 13 | RDR2-sensitive |
| ATTAGGGTAGAATACAGGATGAGC  | 0   | 10 | RDR2-sensitive |
| ATTAGGTTGTCAGGTTGGATGGAT  | 0   | 9  | RDR2-sensitive |
| ATTAGTAAAATTGGTGCGTCGTTC  | 15  | 0  | RDR2-resistant |
| ATTAGTCTCTGTAGAGTGGCAGAT  | 46  | 0  | RDR2-resistant |
| ATTAGTGACGCGCATGAATGGATT  | 42  | 1  | RDR2-resistant |
| ATTAGTGGGATTCTACCTTGGCAT  | 0   | 12 | RDR2-sensitive |
| ATTAGTTGTCGTTTTGGATAAGGT  | 4   | 20 | RDR2-sensitive |
| ATTATAACAGTCGTCTGAATCCTC  | 15  | 0  | RDR2-resistant |
| ATTATAGACTGTAGTGTGGTGTCT  | 0   | 12 | RDR2-sensitive |
| ATTATAGATCCATGTAGTAGCATT  | 29  | 1  | RDR2-resistant |
| ATTATATCGATTGTTAGCAGTATG  | 21  | 0  | RDR2-resistant |
| ATTATATGCATTCTGTAGGAAGAC  | 25  | 2  | RDR2-resistant |
| ATTATCGTGCGGAGGTATAGATGG  | 0   | 16 | RDR2-sensitive |
| ATTATCGTTGAACTGTTAGTCGGT  | 0   | 15 | RDR2-sensitive |
| ATTATCTATGATCGTGGATATGAC  | 0   | 11 | RDR2-sensitive |
| ATTATGGTTTTGTCGACATTATGA  | 19  | 0  | RDR2-resistant |
| ATTATGTTGCGACAGACTGGCTGT  | 0   | 12 | RDR2-sensitive |
| ATTATTCAAGGACTGTTCAAGCAA  | 177 | 3  | RDR2-resistant |
| ATTATTGTGGTCTGTAATGAGGTT  | 0   | 10 | RDR2-sensitive |
| ATTATTTCAACATGGTTGTTCCGGA | 54  | 2  | RDR2-resistant |
| ATTATTTGATCGGATATCGGATAC  | 3   | 48 | RDR2-sensitive |
| ATTATTTTGTGTAGATAAATGGC   | 49  | 4  | RDR2-resistant |
| ATTCAAATTGGACTTTAAAAGCAT  | 265 | 24 | RDR2-resistant |
| ATTCAACTGGAAGATGCATCTGCC  | 0   | 14 | RDR2-sensitive |
| ATTCAACTTGAAGATGCATCTGCC  | 0   | 16 | RDR2-sensitive |
| ATTCAAGGACTGTTCAAGCAAGGA  | 26  | 3  | RDR2-resistant |
| ATTCAATATGTTATCTTGTCGGAT  | 55  | 6  | RDR2-resistant |
| ATTCAATCGGTAGGAGCGACGGGC  | 3   | 37 | RDR2-sensitive |
| ATTCACAAGTGGAGGACCCTAGAC  | 36  | 1  | RDR2-resistant |
| ATTCACACAATTGGTCATCGCGCT  | 18  | 0  | RDR2-resistant |
| ATTCACGCAGGGACGGTAGAGCAA  | 0   | 33 | RDR2-sensitive |
| ATTCACGGACCGGGTACAAGCCAT  | 1   | 39 | RDR2-sensitive |
| ATTCACGGACCGGGTACTATCCAT  | 0   | 12 | RDR2-sensitive |
| ATTCACGTGACTGTATTTGAGGAT  | 0   | 9  | RDR2-sensitive |
| ATTCACTGTAGCGGCATGCATCTT  | 0   | 34 | RDR2-sensitive |
| ATTCAGACTGTCCGGTATGACACC  | 0   | 11 | RDR2-sensitive |
| ATTCAGAGACGGTTAGATTTTGCT  | 20  | 1  | RDR2-resistant |
| ATTCAGATATCTGTCCGATCGGAT  | 0   | 12 | RDR2-sensitive |
| ATTCAGCCTGTTGATGATCTCGTT  | 1   | 38 | RDR2-sensitive |
| ATTCAGCGTCGGCTTGCCATCAC   | 14  | 0  | RDR2-resistant |
| ATTCATATACTTATCCGTCGGATC  | 0   | 15 | RDR2-sensitive |

|                            |    |     |                |
|----------------------------|----|-----|----------------|
| ATTCATATCGGGCCGAAACGGGTT   | 0  | 14  | RDR2-sensitive |
| ATTCATCTGAGATTGATTGTAGCT   | 16 | 0   | RDR2-resistant |
| ATTCATGCCGGGCTCGGATCAGGC   | 0  | 10  | RDR2-sensitive |
| ATTCATGCTGTTAGATCGCGGACC   | 0  | 48  | RDR2-sensitive |
| ATTCATGGACTGAACGTAGATGGA   | 0  | 67  | RDR2-sensitive |
| ATTCATGTCGGGCCGGCACGATCC   | 0  | 9   | RDR2-sensitive |
| ATTCATGTCGTAAGGACGGTCCT    | 0  | 36  | RDR2-sensitive |
| ATTCATTTTTTATCTTCTGACGCT   | 39 | 0   | RDR2-resistant |
| ATTCAGGTCTGTGGGCAAGACGG    | 0  | 9   | RDR2-sensitive |
| ATTCATCAGTTATCTTGTCCGAT    | 21 | 0   | RDR2-resistant |
| ATTCATCGGTGCTGCAGTGGCGT    | 1  | 22  | RDR2-sensitive |
| ATTCCTGTCGGCATGTGTCAGGGC   | 0  | 9   | RDR2-sensitive |
| ATTCCTCGGATGTAGTTGGTGGCC   | 0  | 13  | RDR2-sensitive |
| ATTCCTGGGACTCGACAAGCTGGC   | 0  | 10  | RDR2-sensitive |
| ATTCCTGTAGCAGCCATGGACGGA   | 0  | 9   | RDR2-sensitive |
| ATTCCTGTAGTGTGGCACGGCTT    | 0  | 12  | RDR2-sensitive |
| ATTCGAAATCGGAATGCAGCGGAG   | 21 | 0   | RDR2-resistant |
| ATTCGAACGACTAACCTTAGGCAA   | 0  | 141 | RDR2-sensitive |
| ATTCGAACGACTAACTTTAGGCAA   | 1  | 13  | RDR2-sensitive |
| ATTCGAACGACTAATCTTAGGCAA   | 0  | 11  | RDR2-sensitive |
| ATTCGAACGACTAATTTTAGGCAA   | 0  | 10  | RDR2-sensitive |
| ATTCGAAGGTTACTGGCATTGTGA   | 17 | 0   | RDR2-resistant |
| ATTCGAATGTTATTTTCGTCGGCC   | 0  | 20  | RDR2-sensitive |
| ATTCGACCTTTTTACTCTACGGCC   | 0  | 10  | RDR2-sensitive |
| ATTCGAGAGAGTAGAATTGCGGAT   | 0  | 9   | RDR2-sensitive |
| ATTCGAGGCGGATTAAGGCATCCT   | 15 | 0   | RDR2-resistant |
| ATTCGAGTCAGCTGTTGAAACGGT   | 1  | 24  | RDR2-sensitive |
| ATTCGATGGCTTGTGGACGGTTAT   | 1  | 14  | RDR2-sensitive |
| ATTCGCAATAGGGCACTGTGGCAT   | 0  | 10  | RDR2-sensitive |
| ATTCGCGGGTATAGTCACGGACGG   | 0  | 13  | RDR2-sensitive |
| ATTCGCGTATAGCGTTGGACAGTC   | 0  | 11  | RDR2-sensitive |
| ATTCGCTGTAGATGGGCCGCGACC   | 0  | 10  | RDR2-sensitive |
| ATTCGCTTCGGATTAAGCCGGTT    | 0  | 13  | RDR2-sensitive |
| ATTCGGAACCCAGAACACGCGCAC   | 0  | 32  | RDR2-sensitive |
| ATTCGGACCGGGCTCGGACCGGAC   | 0  | 15  | RDR2-sensitive |
| ATTCGGACGACTAACCTTAGGCAA   | 2  | 27  | RDR2-sensitive |
| ATTCGGACTATGCGGGGTGCAAAG   | 20 | 0   | RDR2-resistant |
| ATTCGGAGTGTGGAAGATGGTTCT   | 0  | 10  | RDR2-sensitive |
| ATTCGGATTAATTTATGATGGCA    | 1  | 19  | RDR2-sensitive |
| ATTCGGATTTTCGGTTACCCATTGC  | 0  | 9   | RDR2-sensitive |
| ATTCGGCAAGAACCCACGGGTCAT   | 0  | 15  | RDR2-sensitive |
| ATTCGGCGAGAACCCACGGGTCAT   | 2  | 48  | RDR2-sensitive |
| ATTCGGCTAATGTAGGTAGGGCGC   | 0  | 24  | RDR2-sensitive |
| ATTCGGCTTGCTCTAAGCAGAA     | 0  | 10  | RDR2-sensitive |
| ATTCGGGACGGATACGGGTAATAC   | 0  | 11  | RDR2-sensitive |
| ATTCGGGCGGATAAGAGACGGATA   | 0  | 24  | RDR2-sensitive |
| ATTCGGTCTATTAGGGTAATTCGG   | 0  | 45  | RDR2-sensitive |
| ATTCGGTCTATTTCGGGTTTCGGGTT | 0  | 10  | RDR2-sensitive |
| ATTCGGTCTATTTCGGGTTTCGGTTC | 0  | 26  | RDR2-sensitive |

|                           |    |    |                |
|---------------------------|----|----|----------------|
| ATTCGGTTCTGTTGCAACACACGG  | 0  | 23 | RDR2-sensitive |
| ATTCGTACAGTAGGAAGTGAGGCG  | 0  | 15 | RDR2-sensitive |
| ATTCGTACAGTGGGAAGTGAGGCG  | 0  | 27 | RDR2-sensitive |
| ATTCGTACCGGACCGAAACGGGTT  | 0  | 30 | RDR2-sensitive |
| ATTCGTACCGGGCCGAAACAGGTT  | 0  | 10 | RDR2-sensitive |
| ATTCGTACCGGGCCGAAACGGGTT  | 0  | 55 | RDR2-sensitive |
| ATTCGTACCGGGCTGAAACAGGTT  | 0  | 17 | RDR2-sensitive |
| ATTCGTACTGGACCGAAACGGATT  | 0  | 9  | RDR2-sensitive |
| ATTCGTACTGGGCTGAAACGGGTT  | 0  | 13 | RDR2-sensitive |
| ATTCGTAGCGTGGGCTGTTGAGGC  | 0  | 13 | RDR2-sensitive |
| ATTCGTATCGGGCTGAAACGGGTT  | 0  | 65 | RDR2-sensitive |
| ATTCGTATCTCTGTAGCCAGGCTC  | 0  | 13 | RDR2-sensitive |
| ATTCGTATGTAGGGATAAAAACGG  | 0  | 9  | RDR2-sensitive |
| ATTCGTCAACAGATAGATGGGCTC  | 0  | 17 | RDR2-sensitive |
| ATTCGTCTGTAGATCTGTGCGGC   | 0  | 16 | RDR2-sensitive |
| ATTCGTCGAGTGTTTTATAGGCTT  | 0  | 11 | RDR2-sensitive |
| ATTCGTGCCGGGCTGGTCTAGGCC  | 0  | 10 | RDR2-sensitive |
| ATTCGTGTCAGCTGTGGAAACGGT  | 6  | 55 | RDR2-sensitive |
| ATTCGTGTCAGCTGTTGAAACGGT  | 8  | 66 | RDR2-sensitive |
| ATTCGTGTCGGGCCAGTCCGGGCT  | 0  | 10 | RDR2-sensitive |
| ATTCGTGTCGGGCCTAATCGTGCC  | 0  | 14 | RDR2-sensitive |
| ATTCGTGTCTGCTGTGGAAACGGT  | 0  | 47 | RDR2-sensitive |
| ATTCGTTCTGTATCCAACGGTGTT  | 0  | 10 | RDR2-sensitive |
| ATTCGTTGAGCCAGATGATGACTG  | 33 | 2  | RDR2-resistant |
| ATTCGTTGCTACTGTATAAAGACG  | 0  | 10 | RDR2-sensitive |
| ATTCGTTGGGTAGACAGGTAAG    | 0  | 11 | RDR2-sensitive |
| ATTCGTTGGTTCGTTAAAATTAATA | 17 | 0  | RDR2-resistant |
| ATTCGTTGGTTGTTGCATATTGGT  | 0  | 16 | RDR2-sensitive |
| ATTCGTTGTGGCTTACTGCGGCTT  | 0  | 29 | RDR2-sensitive |
| ATTCGTTTACTTGAATGGGGACGC  | 14 | 0  | RDR2-resistant |
| ATTCGTTTCTGTACCATGAGTCAT  | 0  | 11 | RDR2-sensitive |
| ATTCTAAACCGTTCGTTGGATGATC | 46 | 0  | RDR2-resistant |
| ATTCTAACGGCTGGTCTCGGTAAC  | 58 | 1  | RDR2-resistant |
| ATTCTAAGTCTGTGGGCAAGATGG  | 10 | 38 | RDR2-sensitive |
| ATTCTACCGTGCCGGGCTCGGACC  | 0  | 14 | RDR2-sensitive |
| ATTCTACCGTGCCGGGTTCCGACC  | 0  | 65 | RDR2-sensitive |
| ATTCTATAAGACGGTAGTGTAGAC  | 0  | 26 | RDR2-sensitive |
| ATTCTATCTTTAAGTCGGTTTGCA  | 1  | 13 | RDR2-sensitive |
| ATTCTATCTTTAAGTCGGTTTGTA  | 0  | 10 | RDR2-sensitive |
| ATTCTATGTTTGGCAAGCAGAACG  | 0  | 13 | RDR2-sensitive |
| ATTCTATTTGGGTTATCGTGGACA  | 40 | 1  | RDR2-resistant |
| ATTCTACATGGGTCGTGTCCGAT   | 0  | 18 | RDR2-sensitive |
| ATTCTCAGACAAATCTCGGCTCAC  | 0  | 14 | RDR2-sensitive |
| ATTCTCCGAAGCGGACTGACGGTG  | 0  | 12 | RDR2-sensitive |
| ATTCTCTGTATGTAGTTGGTAGCC  | 0  | 10 | RDR2-sensitive |
| ATTCTGAAAAGCAGCTGAACTGAT  | 0  | 14 | RDR2-sensitive |
| ATTCTGAAATAGAAAAGCTGACGT  | 0  | 12 | RDR2-sensitive |
| ATTCTGAACCTCGTGCATTGTAGC  | 23 | 0  | RDR2-resistant |
| ATTCTGACGAACTGTTGAGGACGA  | 0  | 18 | RDR2-sensitive |

|                            |    |    |                |
|----------------------------|----|----|----------------|
| ATTCTGACTGTCCGTCCATATGGC   | 1  | 12 | RDR2-sensitive |
| ATTCTGACTTAGAGGCGTTCAGTC   | 18 | 0  | RDR2-resistant |
| ATTCTGAGAAGCAGCTGAACTGAT   | 0  | 52 | RDR2-sensitive |
| ATTCTGCTGGGCTCTACACGAAGA   | 17 | 0  | RDR2-resistant |
| ATTCTGGAATTGCATATCTTGAAG   | 17 | 0  | RDR2-resistant |
| ATTCTGGACAAAGAGTTAAGGTAC   | 25 | 0  | RDR2-resistant |
| ATTCTGGACAGTGGATAGAGGTAG   | 0  | 9  | RDR2-sensitive |
| ATTCTGGACGCTGATCTGGCGCAT   | 0  | 16 | RDR2-sensitive |
| ATTCTGTAACGTGTGAATCGCCTG   | 0  | 12 | RDR2-sensitive |
| ATTCTGTACGAATACGTCTGTCCG   | 0  | 13 | RDR2-sensitive |
| ATTCTGTCCGGAGCGTGC GG GAGG | 0  | 9  | RDR2-sensitive |
| ATTCTGTCTGATTGGTTCGGTGTG   | 0  | 15 | RDR2-sensitive |
| ATTCTGTGGTGTAGTGCTAAACGG   | 0  | 25 | RDR2-sensitive |
| ATTCTGTTTGTGGTCTTTCCGGT    | 91 | 7  | RDR2-resistant |
| ATTCTTAAGACGGTAGTGTAGACC   | 0  | 15 | RDR2-sensitive |
| ATTCTTATTGGACTTTGTGTGCGG   | 0  | 97 | RDR2-sensitive |
| ATTCTTCGGATATAGTTGGTGGAC   | 0  | 10 | RDR2-sensitive |
| ATTCTTGCTGCTTGGTCTATCTGG   | 14 | 0  | RDR2-resistant |
| ATTCTTGGTTGTCCACTGCATGGC   | 0  | 16 | RDR2-sensitive |
| ATTCTTGTGCGCTGGGACGACGGT   | 0  | 12 | RDR2-sensitive |
| ATTCTTTTTAGGTGACCTGACAAC   | 25 | 3  | RDR2-resistant |
| ATTGAAATCGGTTGAATTCGGTAT   | 19 | 0  | RDR2-resistant |
| ATTGAACATTTTACTCGGCGTCAT   | 0  | 10 | RDR2-sensitive |
| ATTGAACCTCGGATACGGGTAGGA   | 0  | 33 | RDR2-sensitive |
| ATTGAACTCGGTTGAATTCGGTAT   | 26 | 1  | RDR2-resistant |
| ATTGAACTCTCACGCATAGCGCAT   | 0  | 26 | RDR2-sensitive |
| ATTGAATCGGACCGTGCCCGGCAC   | 0  | 35 | RDR2-sensitive |
| ATTGAATCGGACTGTGCCGGATGG   | 0  | 13 | RDR2-sensitive |
| ATTGAATCTACGCAGGACTTCGCC   | 19 | 0  | RDR2-resistant |
| ATTGACCGGACTTAGATCGGTATG   | 0  | 9  | RDR2-sensitive |
| ATTGACGCCTAGGTCTCGGATGCG   | 0  | 16 | RDR2-sensitive |
| ATTGACGTCAACTGTATTTAGGGA   | 0  | 20 | RDR2-sensitive |
| ATTGACTGAACCCATGGGATGAAC   | 25 | 0  | RDR2-resistant |
| ATTGACTGGTGGAGACGAAGGCAT   | 0  | 16 | RDR2-sensitive |
| ATTGACTTCGGTACTGACGTCATC   | 65 | 0  | RDR2-resistant |
| ATTGAGATGTGACTGTTGGTGGCT   | 0  | 9  | RDR2-sensitive |
| ATTGAGGTATTGTAAACTGCGGTA   | 0  | 11 | RDR2-sensitive |
| ATTGAGTAAGAAGTGGAAGATGT    | 37 | 1  | RDR2-resistant |
| ATTGAGTTGCAGTAGATGAGATAT   | 0  | 10 | RDR2-sensitive |
| ATTGAGTTGTAAGACTGTATGCAT   | 0  | 10 | RDR2-sensitive |
| ATTGATAGGACGGTATCGCCGGTG   | 0  | 16 | RDR2-sensitive |
| ATTGATCGTTGAGCAAGTCGGTGA   | 0  | 12 | RDR2-sensitive |
| ATTGATGCTGCAGAACTAGGCATT   | 0  | 21 | RDR2-sensitive |
| ATTGATGGGCGGTACGGTATGGAA   | 17 | 0  | RDR2-resistant |
| ATTGATGGTAATCGCTTCTGGACT   | 25 | 2  | RDR2-resistant |
| ATTGATTACATAACTGGACGTCAT   | 0  | 10 | RDR2-sensitive |
| ATTGATTCTGTAGCAAAGCACGGT   | 0  | 22 | RDR2-sensitive |
| ATTGATTGATGGGCTTATATGGTG   | 14 | 0  | RDR2-resistant |
| ATTGATTGCATTGCGGGTACGGAC   | 46 | 0  | RDR2-resistant |

|                           |    |    |                |
|---------------------------|----|----|----------------|
| ATTGATTGTAGGCTGTGTTGGTTG  | 0  | 17 | RDR2-sensitive |
| ATTGATTGTTGATCGATTGTTGGT  | 0  | 10 | RDR2-sensitive |
| ATTGATTTTGATTGATTGTTGGT   | 0  | 14 | RDR2-sensitive |
| ATTGATTTTGTAGCAACGCACGGG  | 0  | 10 | RDR2-sensitive |
| ATTGATTTTTGGAGTGGGATGGT   | 0  | 12 | RDR2-sensitive |
| ATTGCCACAGATGGTGAGTCGGCA  | 0  | 15 | RDR2-sensitive |
| ATTGCCACCGCGGACTGTTCCGGAT | 0  | 15 | RDR2-sensitive |
| ATTGCCGCTGTACGACGACGCCGG  | 0  | 19 | RDR2-sensitive |
| ATTGCCTGATTGTGATTTTCGGTT  | 0  | 9  | RDR2-sensitive |
| ATTGCCTGGTACTGTGATCGGTAG  | 0  | 61 | RDR2-sensitive |
| ATTGCCTGTAGAGCGTGTCCGGCA  | 0  | 50 | RDR2-sensitive |
| ATTGCGCGAGACAGTGTAAAGATGG | 0  | 9  | RDR2-sensitive |
| ATTGCGCGGCGGACTAGCGGCTAG  | 0  | 14 | RDR2-sensitive |
| ATTGCGCTGTTCCGAATACCTATT  | 0  | 10 | RDR2-sensitive |
| ATTGCTACGGATTGTGAGTCGGCA  | 0  | 15 | RDR2-sensitive |
| ATTGCTCTCGGACCGAACGGGCGT  | 0  | 40 | RDR2-sensitive |
| ATTGCTGGAGAGCGTAGAAGACTG  | 0  | 19 | RDR2-sensitive |
| ATTGCTGGAGGGAGTAGAGGACGT  | 0  | 9  | RDR2-sensitive |
| ATTGCTGTAGAAGTGTGCAGGCCG  | 0  | 24 | RDR2-sensitive |
| ATTGCTTGGTCGTCTGCGTGCAT   | 0  | 13 | RDR2-sensitive |
| ATTGGAACGATACAGAGAAGAGAC  | 17 | 0  | RDR2-resistant |
| ATTGGAACGATACAGAGAAGATTA  | 56 | 2  | RDR2-resistant |
| ATTGGAAGCTGCTGGACGATGTTGT | 0  | 9  | RDR2-sensitive |
| ATTGGAAGCCTGTATGTGGACGGT  | 0  | 10 | RDR2-sensitive |
| ATTGGAATTCCAAGGGTCGTTGGC  | 0  | 9  | RDR2-sensitive |
| ATTGGACAGAAGATAGCGGGGCGC  | 0  | 14 | RDR2-sensitive |
| ATTGGACAGGAAAGCCTGAAACGG  | 0  | 16 | RDR2-sensitive |
| ATTGGACCCTGAAACACACGAGAC  | 19 | 0  | RDR2-resistant |
| ATTGGACGGATGGGTTGGATACAT  | 1  | 23 | RDR2-sensitive |
| ATTGGACGGGATCGAGACGGATTT  | 0  | 9  | RDR2-sensitive |
| ATTGGACGGTCCGGATCTATCCGA  | 0  | 24 | RDR2-sensitive |
| ATTGGACGGTTGAGATAGTCGGAA  | 0  | 14 | RDR2-sensitive |
| ATTGGACTAGTTGATGTTTTGGCA  | 15 | 0  | RDR2-resistant |
| ATTGGACTGTCCGGTGTGCCCATC  | 1  | 19 | RDR2-sensitive |
| ATTGGACTTTCGGTATTATAACAG  | 0  | 38 | RDR2-sensitive |
| ATTGGACTTTGTGTGCGGTGGGCC  | 0  | 13 | RDR2-sensitive |
| ATTGGACTTTGTGTGCGGTGGGGC  | 0  | 14 | RDR2-sensitive |
| ATTGGACTTTGTGTGCGGTGGGGT  | 0  | 13 | RDR2-sensitive |
| ATTGGAGGGACGAGAGAGGACGTC  | 0  | 9  | RDR2-sensitive |
| ATTGGAGGGACTAGATCTGCGGTA  | 0  | 13 | RDR2-sensitive |
| ATTGGATCGTGCCTGTACCCGGCT  | 0  | 9  | RDR2-sensitive |
| ATTGGATGCCTGTATCGGACGCGC  | 0  | 12 | RDR2-sensitive |
| ATTGGATGCTTGTGTTGTAGATGGA | 0  | 13 | RDR2-sensitive |
| ATTGGATTGTGTGTTGGTGTGTGC  | 53 | 3  | RDR2-resistant |
| ATTGGCATGTACTTAGGGCGCTAG  | 1  | 16 | RDR2-sensitive |
| ATTGGCGCCGGCACACACATGCTC  | 0  | 19 | RDR2-sensitive |
| ATTGGCTCCGGCAGAGAAGCTGCT  | 0  | 17 | RDR2-sensitive |
| ATTGGCTCTAGGTATCGATGGCAC  | 0  | 19 | RDR2-sensitive |
| ATTGGCTGAGTCTGTGGCAGGCAT  | 1  | 26 | RDR2-sensitive |

|                           |    |    |                |
|---------------------------|----|----|----------------|
| ATTGGGACACTATATACACGACGT  | 14 | 0  | RDR2-resistant |
| ATTGGGCAGAGACTTCATGATCAT  | 28 | 3  | RDR2-resistant |
| ATTGGGGTCCGGGGTATTCCGGGTG | 20 | 0  | RDR2-resistant |
| ATTGGGTACTGTAGGACGGCTAAT  | 0  | 9  | RDR2-sensitive |
| ATTGGGTCCGTGCTCGTCTGAGGC  | 17 | 1  | RDR2-resistant |
| ATTGGTACTGTAGAAGACTAGGTT  | 0  | 21 | RDR2-sensitive |
| ATTGGTAGTTTGGTGGCTCGTCGT  | 0  | 24 | RDR2-sensitive |
| ATTGGTATTAGTGATGCATGTATG  | 22 | 0  | RDR2-resistant |
| ATTGGTCAGTTCGGATCCGGTGGC  | 0  | 9  | RDR2-sensitive |
| ATTGGTCATCGCGCTTGGTTGAAA  | 33 | 0  | RDR2-resistant |
| ATTGGTCCAGGCTGAGGCTAGCAT  | 0  | 9  | RDR2-sensitive |
| ATTGGTCCCCTTAGTATCGTCACA  | 0  | 12 | RDR2-sensitive |
| ATTGGTCCGTAGCACCGACGGTTC  | 0  | 10 | RDR2-sensitive |
| ATTGGTCGAACCTTTGATGTTGCAT | 55 | 0  | RDR2-resistant |
| ATTGGTCGCTGTAGGGGTTACAAG  | 0  | 9  | RDR2-sensitive |
| ATTGGTCGGGTCGAGTCAGGTCGG  | 0  | 13 | RDR2-sensitive |
| ATTGGTCGGGTCGGGTTGGTCGGA  | 0  | 9  | RDR2-sensitive |
| ATTGGTCGGGTTGAAGGAGAGGTG  | 0  | 11 | RDR2-sensitive |
| ATTGGTCGTGGTATGTCTTAGGTT  | 34 | 0  | RDR2-resistant |
| ATTGGTGAATGTATCAGTAGTCGG  | 0  | 9  | RDR2-sensitive |
| ATTGGTGGTAGTAAGTATGGTTTA  | 22 | 2  | RDR2-resistant |
| ATTGGTTCGGTAGACACGGTCTAT  | 0  | 22 | RDR2-sensitive |
| ATTGGTTGGTACTGTGACCGGCAG  | 0  | 9  | RDR2-sensitive |
| ATTGTAATGATCTGTGGAATACAA  | 0  | 11 | RDR2-sensitive |
| ATTGTAGAACGGTAGAATGGACGG  | 0  | 12 | RDR2-sensitive |
| ATTGTAGACTTAGTAGAAGCAGGT  | 0  | 9  | RDR2-sensitive |
| ATTGTAGACTTGATCAACGGAGAC  | 0  | 11 | RDR2-sensitive |
| ATTGTAGACTTTCATGAAGGGCAT  | 4  | 17 | RDR2-sensitive |
| ATTGTAGAGTGGACGGTTGATACC  | 0  | 19 | RDR2-sensitive |
| ATTGTAGAGTTCGTACGAACGGTT  | 0  | 11 | RDR2-sensitive |
| ATTGTAGCATTCTGTCGGGAGCGT  | 0  | 39 | RDR2-sensitive |
| ATTGTAGGCTGTGTTGGTTGGTTC  | 0  | 27 | RDR2-sensitive |
| ATTGTAGGCTTCTCCAGTAGACCG  | 0  | 12 | RDR2-sensitive |
| ATTGTAGTCGATTGTAAAGGGCAT  | 2  | 26 | RDR2-sensitive |
| ATTGTAGTCTCAAGCGCACGACAT  | 0  | 31 | RDR2-sensitive |
| ATTGTAGTCTCTGCACTAGAGTAG  | 0  | 24 | RDR2-sensitive |
| ATTGTAGTTGGACGGCGACCGTGT  | 0  | 12 | RDR2-sensitive |
| ATTGTCAAATGGGCTGAGCCGGTC  | 0  | 9  | RDR2-sensitive |
| ATTGTACATGTAAGTTTAACGGG   | 1  | 12 | RDR2-sensitive |
| ATTGTACAGCGCCAGAAATCGGTA  | 0  | 23 | RDR2-sensitive |
| ATTGTCATGTGACTGTTGGTGGCT  | 0  | 12 | RDR2-sensitive |
| ATTGTCCTCTGTTGACTGCGGCTT  | 0  | 17 | RDR2-sensitive |
| ATTGTCCTTGTAACCTTGATGGCT  | 0  | 13 | RDR2-sensitive |
| ATTGTCGACCCTGCTGATTTCCGGT | 0  | 32 | RDR2-sensitive |
| ATTGTCGAGCTTGCTGATGTGGCC  | 14 | 0  | RDR2-resistant |
| ATTGTCGCGGGCGGATATTTACCA  | 0  | 16 | RDR2-sensitive |
| ATTGTCGCTGTAAGTAGATGTGCC  | 0  | 15 | RDR2-sensitive |
| ATTGTCGGTCACTTTCTTCAGGCT  | 0  | 10 | RDR2-sensitive |
| ATTGTCTGAATTACTTGCTGAAGA  | 35 | 1  | RDR2-resistant |



|                           |     |     |                |
|---------------------------|-----|-----|----------------|
| ATTGTCTGACGATGATTCATGGC   | 35  | 1   | RDR2-resistant |
| ATTGTCTGAAATGTGGTTGCATA   | 14  | 0   | RDR2-resistant |
| ATTGTCTTACACTGTAGACTGCAT  | 0   | 9   | RDR2-sensitive |
| ATTGTCTTTTTCGCTCGGTCACGG  | 0   | 12  | RDR2-sensitive |
| ATTGTGCACTGTGAACGCCTACGG  | 0   | 14  | RDR2-sensitive |
| ATTGTGGCGAGTAGAAGAGCCCGT  | 0   | 9   | RDR2-sensitive |
| ATTGTGGGCAGTGAAGATGGAGAT  | 42  | 0   | RDR2-resistant |
| ATTGTGGTATTGTAAACTGCGGTA  | 0   | 11  | RDR2-sensitive |
| ATTGTGTCACTGTTACATGATCGT  | 0   | 11  | RDR2-sensitive |
| ATTGTGTGCGGCCATGCATTGAGC  | 0   | 18  | RDR2-sensitive |
| ATTGTGTGCTTGTAGTTAAAAGCA  | 51  | 4   | RDR2-resistant |
| ATTGTGTGTCGTCGGTTTTGCATC  | 18  | 0   | RDR2-resistant |
| ATTGTTAGGACCATGCTTCGTCGT  | 0   | 19  | RDR2-sensitive |
| ATTGTTAGTCGGTATACATTGCCA  | 0   | 12  | RDR2-sensitive |
| ATTGTTAGTCTGTGGGATGTGGCT  | 0   | 18  | RDR2-sensitive |
| ATTGTTCCAGGAGATGAGATGACA  | 14  | 0   | RDR2-resistant |
| ATTGTTGAATTTTTTCGCTTGGA   | 36  | 0   | RDR2-resistant |
| ATTGTTGACTGTGAAGCCGGAGAT  | 32  | 3   | RDR2-resistant |
| ATTGTTGATGTGGAACAATCGGGA  | 20  | 0   | RDR2-resistant |
| ATTGTTGGCTAGTTTAATGGCGCT  | 57  | 7   | RDR2-resistant |
| ATTGTTGGGACCATGCTTCGTCGC  | 0   | 13  | RDR2-sensitive |
| ATTGTTGGGGTATACTTCGTAGC   | 0   | 10  | RDR2-sensitive |
| ATTGTTGGTCTGTGATGATGGTCT  | 0   | 16  | RDR2-sensitive |
| ATTGTTGTCTGCTGTGGCTACGGT  | 54  | 7   | RDR2-resistant |
| ATTGTTTATTTAATCGGGCATTTT  | 33  | 5   | RDR2-resistant |
| ATTGTTTGAATTTTCGGGCCGGCCT | 0   | 11  | RDR2-sensitive |
| ATTGTTTGGTATCTTAGGCACAAT  | 112 | 0   | RDR2-resistant |
| ATTGTTTGGTTACCTGTACGCGGA  | 0   | 28  | RDR2-sensitive |
| ATTGTTTTAACATGGTTGTTTCGGA | 52  | 1   | RDR2-resistant |
| ATTGTTTTACATCACAGTCGGTGC  | 0   | 11  | RDR2-sensitive |
| ATTGTTTTGAGAGTTTGGGAGCCC  | 25  | 0   | RDR2-resistant |
| ATTTAAAGGACCGTTTAGAGGACG  | 1   | 14  | RDR2-sensitive |
| ATTTAACAACCTATGGTCGGTTCGC | 0   | 9   | RDR2-sensitive |
| ATTTAAGACTGAGACATACCGGGC  | 0   | 14  | RDR2-sensitive |
| ATTTAATAGTGCCGGGCTGGGCAT  | 1   | 26  | RDR2-sensitive |
| ATTTACAAGGACGTGCTTTTCTAA  | 30  | 0   | RDR2-resistant |
| ATTTACGACGGCCGTTGGATGGAA  | 0   | 17  | RDR2-sensitive |
| ATTTACGACGGCCGTTGGATGGGA  | 0   | 17  | RDR2-sensitive |
| ATTTACGGAGGACACGGCGAGCGC  | 0   | 11  | RDR2-sensitive |
| ATTTACTGTAGCATCATACATCTT  | 0   | 12  | RDR2-sensitive |
| ATTTACTGTGACTGTAGCATCGGC  | 0   | 31  | RDR2-sensitive |
| ATTTAGAACTGTGTTTCTTGGCAT  | 0   | 9   | RDR2-sensitive |
| ATTTAGAGAACTGTTTAGAGGACG  | 1   | 14  | RDR2-sensitive |
| ATTTAGAGGACCATTTAGAGGACG  | 1   | 15  | RDR2-sensitive |
| ATTTAGAGGACCGTTTAGAGGACG  | 21  | 197 | RDR2-sensitive |
| ATTTAGAGGACGCTGCTGGAGAGC  | 0   | 18  | RDR2-sensitive |
| ATTTAGAGGACTATTTAGAGGACG  | 0   | 11  | RDR2-sensitive |
| ATTTAGCAAAAATGTGTAGTTGT   | 0   | 9   | RDR2-sensitive |
| ATTTAGTGGACTTAGAAATCGGCC  | 0   | 13  | RDR2-sensitive |

|                           |    |    |                |
|---------------------------|----|----|----------------|
| ATTTAGTTTGGAAACGGAAGCATC  | 77 | 3  | RDR2-resistant |
| ATTTATAGACTCGAGAAGCCGCTC  | 0  | 12 | RDR2-sensitive |
| ATTTATCGGACAGTGCATTTTAGC  | 0  | 11 | RDR2-sensitive |
| ATTTATGATGTAGGGGCTCGGCGT  | 0  | 11 | RDR2-sensitive |
| ATTTATGCGCATGCATTGGATCGT  | 0  | 11 | RDR2-sensitive |
| ATTTATGTGTAGCGTCGTATATCA  | 28 | 0  | RDR2-resistant |
| ATTTATTAGTTTCGCATGTCGGTC  | 0  | 13 | RDR2-sensitive |
| ATTTATTGTAGTGGTCTGGGTGGT  | 25 | 0  | RDR2-resistant |
| ATTTATTTCTGGTCACTCGTCCGT  | 0  | 16 | RDR2-sensitive |
| ATTTCAACATGGTTGTTCCGATTTC | 14 | 0  | RDR2-resistant |
| ATTTCAACGGTCGTCATGCGTCAT  | 0  | 17 | RDR2-sensitive |
| ATTTCAATCGGATTCCGAGATCGGA | 0  | 9  | RDR2-sensitive |
| ATTTCACCCACTAGTCTGGACGCT  | 0  | 10 | RDR2-sensitive |
| ATTTCAGGATGTAGTTTTGCCGGA  | 30 | 0  | RDR2-resistant |
| ATTTCAGTTCGGTTCGGTACGGTT  | 0  | 26 | RDR2-sensitive |
| ATTTCATACTGTGTCCGACCAAGC  | 0  | 9  | RDR2-sensitive |
| ATTTCATGACTGTGAGACGTGAGC  | 0  | 9  | RDR2-sensitive |
| ATTTCCTTTTATAGACGTCTGGAC  | 1  | 17 | RDR2-sensitive |
| ATTTCCGATTTGCTGTAGCGTTAGC | 24 | 0  | RDR2-resistant |
| ATTTCCGCTGGTACTGTGGTGGGCA | 0  | 30 | RDR2-sensitive |
| ATTTCCGGACCAGGCTTCAATCCCT | 20 | 0  | RDR2-resistant |
| ATTTCCGGACCGGCGACGTTGGCAT | 1  | 31 | RDR2-sensitive |
| ATTTCCGGCCACTGTTTTGCGTCAT | 0  | 13 | RDR2-sensitive |
| ATTTCCGGCGCCAACGGCTACCTGC | 0  | 11 | RDR2-sensitive |
| ATTTCCGGGCTGACACGTCACGGCC | 0  | 9  | RDR2-sensitive |
| ATTTCCGGGCTTAATCGGGTAGCAA | 0  | 14 | RDR2-sensitive |
| ATTTCCGGGTCCGAGCAGAACGACA | 0  | 10 | RDR2-sensitive |
| ATTTCCGGTCTGATCGGTTTCCGTT | 0  | 12 | RDR2-sensitive |
| ATTTCCGGTTCGGTACGGTTCGGTT | 0  | 10 | RDR2-sensitive |
| ATTTCCGGTTCGGTCTATTCGGTCC | 0  | 11 | RDR2-sensitive |
| ATTTCCGGTTCGGTCTATTCGGTTC | 0  | 9  | RDR2-sensitive |
| ATTTCCGGTTCGGTTCGGTACGGTT | 4  | 54 | RDR2-sensitive |
| ATTTCCGGTTTTTTGTAGTTCGGTT | 0  | 9  | RDR2-sensitive |
| ATTTCCGTGGAGCTGGAGCGGTCCC | 0  | 9  | RDR2-sensitive |
| ATTTCTAACTTTCAGTGGGACATT  | 47 | 0  | RDR2-resistant |
| ATTTCTAGTGGCATTGAACGGATC  | 24 | 0  | RDR2-resistant |
| ATTTCTATCCTTCGTCGGCCAACC  | 0  | 64 | RDR2-sensitive |
| ATTTCTCATCGGCACCCTATTTTC  | 14 | 0  | RDR2-resistant |
| ATTTCTCGGTCTTTTGGTTAAAAT  | 63 | 1  | RDR2-resistant |
| ATTTCTCGGTTTCATCGGCAAAGTC | 0  | 16 | RDR2-sensitive |
| ATTTCTCTGTTGGCTAGGACGGTT  | 22 | 1  | RDR2-resistant |
| ATTTCTCTTCATCGTATGGACATC  | 0  | 15 | RDR2-sensitive |
| ATTTCTGCATATATGATTTTCGGT  | 15 | 0  | RDR2-resistant |
| ATTTCTTAGTCTTTGAACCAGAGG  | 0  | 22 | RDR2-sensitive |
| ATTTCTTGATCTTTGAACCAGAGG  | 0  | 9  | RDR2-sensitive |
| ATTTCTTGGTCTTTGAACCAGAGG  | 0  | 12 | RDR2-sensitive |
| ATTTCTTGTGAACTGTGTCGTTGT  | 0  | 11 | RDR2-sensitive |
| ATTTCTTTGATGGTTCGTGGATCCC | 25 | 2  | RDR2-resistant |
| ATTTCTTTTGAGTTGTCGTTGGAT  | 0  | 15 | RDR2-sensitive |

|                          |     |    |                |
|--------------------------|-----|----|----------------|
| ATTTCTTTTTAGTTGTCGTTGGAT | 3   | 18 | RDR2-sensitive |
| ATTTGAATGATGCGTCGCCGGCAC | 1   | 16 | RDR2-sensitive |
| ATTTGACCCGAATCTGTGCGTGCT | 17  | 1  | RDR2-resistant |
| ATTTGACGACGTGGATGGCCTCAT | 0   | 9  | RDR2-sensitive |
| ATTTGACTGCGTTTTCTACGGTAT | 0   | 10 | RDR2-sensitive |
| ATTTGAGCACTGTGTGATGATGTC | 3   | 22 | RDR2-sensitive |
| ATTTGAGCATCGTTGGACAATGGT | 50  | 15 | RDR2-resistant |
| ATTTGAGGAATGGATACATGATGC | 0   | 16 | RDR2-sensitive |
| ATTTGAGTAGAGAGTTTAGAAGAT | 19  | 0  | RDR2-resistant |
| ATTTGATCTAGACTGTTTGGTGTA | 0   | 10 | RDR2-sensitive |
| ATTTGATGGATGTAGATGGACGGT | 0   | 23 | RDR2-sensitive |
| ATTTGATGGTGCGGGGATGGGCGT | 15  | 0  | RDR2-resistant |
| ATTTGATTGATGATTTGTTCTATT | 28  | 2  | RDR2-resistant |
| ATTTGATTTGATTGGTTATTCGGA | 32  | 4  | RDR2-resistant |
| ATTTGCAAACGTAGCTGTATGGC  | 0   | 22 | RDR2-sensitive |
| ATTTGCAACTTATGGTCTGTCGGT | 1   | 55 | RDR2-sensitive |
| ATTTGCATCTGTGGAGTGGTTATC | 22  | 0  | RDR2-resistant |
| ATTTGCCGACTGTTTTAAGGCTT  | 0   | 36 | RDR2-sensitive |
| ATTTGCTCTGTGTCGTTGGGAGAT | 20  | 0  | RDR2-resistant |
| ATTTGCTTGACTGTGGCGACGCCA | 0   | 9  | RDR2-sensitive |
| ATTTGCTTTGAAAGCACCGTCGGC | 124 | 15 | RDR2-resistant |
| ATTTGGACTGGTGGGAGGGCTATT | 0   | 11 | RDR2-sensitive |
| ATTTGGATCTGACCTGGCTCGGCT | 0   | 9  | RDR2-sensitive |
| ATTTGGATGGTGTGAGCAGTTCGG | 50  | 1  | RDR2-resistant |
| ATTTGGCCTGGCTGCAGAAGACTC | 0   | 11 | RDR2-sensitive |
| ATTTGGCGGCGTCACTTTATGTTT | 0   | 22 | RDR2-sensitive |
| ATTTGGCTGCGGAGAATGTGCATG | 47  | 7  | RDR2-resistant |
| ATTTGGGACATGCTAAAGACTGCG | 15  | 0  | RDR2-resistant |
| ATTTGGGATAACAAATGTGGATGG | 14  | 0  | RDR2-resistant |
| ATTTGGTACTGTAGTTGTGGGTAC | 0   | 27 | RDR2-sensitive |
| ATTTGGTAGAGCAGGTCATTAGGT | 33  | 0  | RDR2-resistant |
| ATTTGGTATTCGTAGATACGGTTT | 0   | 9  | RDR2-sensitive |
| ATTTGGTGCACAGAACTGCGGCAC | 0   | 14 | RDR2-sensitive |
| ATTTGGTGGACCTGTAGGTGGGGC | 0   | 23 | RDR2-sensitive |
| ATTTGTACAGTCGTCGGGAGGCTT | 0   | 21 | RDR2-sensitive |
| ATTTGTACCGGGCTGAAATGGGTT | 0   | 33 | RDR2-sensitive |
| ATTTGTACCTGAAGGACGCGGCGC | 0   | 13 | RDR2-sensitive |
| ATTTGTACGGCTACATCGAACATA | 0   | 9  | RDR2-sensitive |
| ATTTGTAGCCTGATCCGAGCACGG | 1   | 35 | RDR2-sensitive |
| ATTTGTAGGGATAGGATGGATAAT | 26  | 0  | RDR2-resistant |
| ATTTGTAGTCCTCTCACAGAAAGG | 0   | 12 | RDR2-sensitive |
| ATTTGTCAATCAGGAATCACGGT  | 0   | 27 | RDR2-sensitive |
| ATTTGTGAGCGCTTGGCAGGTAC  | 1   | 15 | RDR2-sensitive |
| ATTTGTCTCATGCACTGTCGGCCC | 0   | 11 | RDR2-sensitive |
| ATTTGTCTCGTCTGGACTTCCGGC | 0   | 9  | RDR2-sensitive |
| ATTTGTCTCGTCTGGACTTTCGGC | 0   | 26 | RDR2-sensitive |
| ATTTGTCTCGTTTGGACTTCCGGC | 0   | 10 | RDR2-sensitive |
| ATTTGTCTCGTTTGGACTTTCGGC | 0   | 13 | RDR2-sensitive |
| ATTTGTCTCTTGCACTGTCGGCCT | 0   | 9  | RDR2-sensitive |

|                             |     |    |                |
|-----------------------------|-----|----|----------------|
| ATTTGTCTGATATACATTTGCATG    | 0   | 9  | RDR2-sensitive |
| ATTTGTGACACAATTTTCGTTGGAT   | 93  | 0  | RDR2-resistant |
| ATTTGTGCAGGGCTGTGCCGGTAA    | 0   | 11 | RDR2-sensitive |
| ATTTGTGCTACTGTGGATGGTGTT    | 1   | 21 | RDR2-sensitive |
| ATTTGTGGCACTGAGCACGGTCGG    | 1   | 26 | RDR2-sensitive |
| ATTTGTGGGCCTAGACTGTCACGG    | 0   | 10 | RDR2-sensitive |
| ATTTGTGGTTCTGATCGCATGATA    | 30  | 0  | RDR2-resistant |
| ATTTGTGTCGTACGAAC TTGGCTA   | 0   | 9  | RDR2-sensitive |
| ATTTGTGTCGTACGAAC TTGGCTG   | 7   | 75 | RDR2-sensitive |
| ATTTGTGTCGTTTTCGAAC TTGGCTG | 0   | 32 | RDR2-sensitive |
| ATTTGTTAGACTATGTGTGTGGGC    | 0   | 13 | RDR2-sensitive |
| ATTTGTTCCGGTGGGCAGTCGGCTT   | 0   | 11 | RDR2-sensitive |
| ATTTGTTGCAACTGTCATGGGCAT    | 0   | 10 | RDR2-sensitive |
| ATTTGTTGGCTCTGTACATGCGGG    | 0   | 16 | RDR2-sensitive |
| ATTTGTTGTATGAAGAGCATGATA    | 23  | 1  | RDR2-resistant |
| ATTTTAAGTTGTGTCTTACGGTGT    | 0   | 11 | RDR2-sensitive |
| ATTTTACAGGACGTGTTAGCGGTT    | 0   | 11 | RDR2-sensitive |
| ATTTTACTGTAAATGGCGATGCAT    | 1   | 47 | RDR2-sensitive |
| ATTTTAGAAGGAGTGAGGTCCGAA    | 17  | 0  | RDR2-resistant |
| ATTTTAGCCGGCCTGTTTGGTATT    | 0   | 9  | RDR2-sensitive |
| ATTTTAGCGGTCTGGGTAGCGGAT    | 0   | 9  | RDR2-sensitive |
| ATTTTAGCTGCTCCGTTGGATACG    | 0   | 11 | RDR2-sensitive |
| ATTTTATATTTTTTCGTCGGGTCT    | 27  | 0  | RDR2-resistant |
| ATTTTATGATTGTAGTGAGGTATA    | 0   | 13 | RDR2-sensitive |
| ATTTTATGGTTGTAGTATGGTATA    | 0   | 10 | RDR2-sensitive |
| ATTTTATGTCGGATCATACTTGT     | 0   | 17 | RDR2-sensitive |
| ATTTTCCGTTCCGATTGTCGGGAT    | 0   | 9  | RDR2-sensitive |
| ATTTTCGACGACATCTGACACGGT    | 0   | 13 | RDR2-sensitive |
| ATTTTCGACGGCTGTATCGGTAGC    | 0   | 12 | RDR2-sensitive |
| ATTTTCGACGGTCTCTGGCACGGC    | 1   | 12 | RDR2-sensitive |
| ATTTTCGGCGACTGTGTCAGACGC    | 0   | 19 | RDR2-sensitive |
| ATTTTCGGCGGCTTCTGACACGGC    | 3   | 34 | RDR2-sensitive |
| ATTTTCGGGTTTGATCTGGGCGGC    | 0   | 10 | RDR2-sensitive |
| ATTTTCTTGGGATTCTTTTGTCGG    | 0   | 32 | RDR2-sensitive |
| ATTTTCTTTTATAGACGTCTGGAC    | 0   | 46 | RDR2-sensitive |
| ATTTTGAGAAGCAGCTGAACTGAT    | 0   | 11 | RDR2-sensitive |
| ATTTTGACCGGATCGGCCAAGTTC    | 22  | 0  | RDR2-resistant |
| ATTTTGACCGGTCTGAGGCACTAT    | 0   | 28 | RDR2-sensitive |
| ATTTTGGATTGTAGCGTGATTGGA    | 0   | 9  | RDR2-sensitive |
| ATTTTGGGGCATGGATTGAGGCAT    | 0   | 27 | RDR2-sensitive |
| ATTTTGTAATTTTGATCTGTCTT     | 0   | 10 | RDR2-sensitive |
| ATTTTGTAGATAGATGGATCAGTT    | 625 | 84 | RDR2-resistant |
| ATTTTGTAGTGGCTTGGATTTAAT    | 19  | 0  | RDR2-resistant |
| ATTTTGTATCTATAGACTGCGGCT    | 0   | 10 | RDR2-sensitive |
| ATTTTGTCTAACTGTTGAAAGGAT    | 109 | 16 | RDR2-resistant |
| ATTTTGTTGCGCGGGACTAACGGA    | 0   | 17 | RDR2-sensitive |
| ATTTTGTTGGACTTCGGCTTCAAG    | 23  | 0  | RDR2-resistant |
| ATTTTGTTGTGGAGTGTAAGGCAC    | 46  | 8  | RDR2-resistant |
| ATTTTTACAGACGGATTCGGTTAT    | 0   | 10 | RDR2-sensitive |

|                           |    |    |                |
|---------------------------|----|----|----------------|
| ATTTTTACTGTAGTAAGACGATAC  | 0  | 18 | RDR2-sensitive |
| ATTTTTAGTAGAGAGTCTTGGATA  | 14 | 0  | RDR2-resistant |
| ATTTTTATAGGTCACGTTGTTGGA  | 0  | 15 | RDR2-sensitive |
| ATTTTTCTGAGGTAGTACGTATCC  | 14 | 0  | RDR2-resistant |
| ATTTTTGCATTTCTGGGCTGGCATG | 0  | 15 | RDR2-sensitive |
| ATTTTTGCTACAGTCGTGACACC   | 5  | 44 | RDR2-sensitive |
| ATTTTTGGACCTCTGCTCGGCGC   | 1  | 19 | RDR2-sensitive |
| ATTTTTGGACCCTTTGCTCGGCAT  | 0  | 10 | RDR2-sensitive |
| ATTTTTGGACCCTTTGCTCGGCGC  | 2  | 46 | RDR2-sensitive |
| ATTTTTGGACCCTTTGCTCGGCGT  | 1  | 24 | RDR2-sensitive |
| ATTTTTGGTGATAAGAGGACATGA  | 14 | 0  | RDR2-resistant |
| ATTTTTGTCACTGTGAATTGCGGC  | 1  | 13 | RDR2-sensitive |
| ATTTTTGTGAGGGGCTGCAAACGG  | 0  | 16 | RDR2-sensitive |
| ATTTTTGTTCCGGTCGGAATCGGTA | 0  | 16 | RDR2-sensitive |
| ATTTTTTAGATTCGGGACGGATAC  | 0  | 10 | RDR2-sensitive |
| ATTTTTTGTGGTGTGTTGAGGGAC  | 38 | 0  | RDR2-resistant |
| ATTTTTTGTTCGGTCGGAATCGGT  | 1  | 64 | RDR2-sensitive |
| CAAAAATACTCGGGCCAGCACGG   | 0  | 9  | RDR2-sensitive |
| CAAAAATTACTCGGGCCAGCACGG  | 0  | 10 | RDR2-sensitive |
| CAAACATGCTCGGGCTGGGTCGG   | 0  | 20 | RDR2-sensitive |
| CAAAGATTTTTGGACCGTTTCGT   | 0  | 16 | RDR2-sensitive |
| CAAAGCACGGCCACAAAGGCAC    | 0  | 10 | RDR2-sensitive |
| CAAATAGGTTGTATCGGTAGACA   | 15 | 0  | RDR2-resistant |
| CAAATGAGCGGACGGTCCGGCCC   | 2  | 15 | RDR2-sensitive |
| CAAACACAGAACAGAGCGGCTCCG  | 0  | 15 | RDR2-sensitive |
| CAAACACAGAGCTCGCACGCGCAT  | 2  | 77 | RDR2-sensitive |
| CAAACACCCCGTAGACTAGGCATG  | 0  | 13 | RDR2-sensitive |
| CAAACACTGGACGGACAGCGACGG  | 0  | 22 | RDR2-sensitive |
| CAAACAGCTGCAACAGTGTCGGCT  | 0  | 12 | RDR2-sensitive |
| CAAACAGTGGTGGACGCAGGACAT  | 0  | 43 | RDR2-sensitive |
| CAAACATTCGATGGGACAGGGGCT  | 0  | 9  | RDR2-sensitive |
| CAAACCTGTTTTGAGCTCGTTGG   | 0  | 14 | RDR2-sensitive |
| CAAACGGACTAGACTGGCTCGAAA  | 0  | 9  | RDR2-sensitive |
| CAAACGGCGTAGCATTGGCGACAT  | 0  | 16 | RDR2-sensitive |
| CAAACCTCTCGGCAAAACGCGACAT | 0  | 9  | RDR2-sensitive |
| CAAACCTGCAGAGACTGATGGGCAC | 2  | 27 | RDR2-sensitive |
| CAAACCTGCAGAGACTGATGGGCGC | 0  | 18 | RDR2-sensitive |
| CAAAGACAAAACGGGCAGGGACAC  | 0  | 31 | RDR2-sensitive |
| CAAAGCAGATGTAGGCCCACTCGC  | 0  | 19 | RDR2-sensitive |
| CAAAGCGACTGGAGGGCAGAGGAA  | 0  | 12 | RDR2-sensitive |
| CAAAGGCTATTTTACTCTCGGCAA  | 6  | 36 | RDR2-sensitive |
| CAAAGGCTGTATCCCGAGAGGCAA  | 1  | 29 | RDR2-sensitive |
| CAAAGGGCTGAATCCAGGAAGCAG  | 0  | 9  | RDR2-sensitive |
| CAAAGGGCTGGATCCAGAAAGCAG  | 0  | 16 | RDR2-sensitive |
| CAAAGGGCTGGATCCAGGAAGCAA  | 0  | 15 | RDR2-sensitive |
| CAAAGGGCTGGATCCAGGAAGCAG  | 5  | 99 | RDR2-sensitive |
| CAAAGGGCTGGATCTAGGAAGCAG  | 1  | 15 | RDR2-sensitive |
| CAAAGTAAGTAGAACGGAATGGCT  | 0  | 10 | RDR2-sensitive |
| CAAAGTAGGACGGGGCAGGGACAA  | 1  | 23 | RDR2-sensitive |

|                            |    |    |                |
|----------------------------|----|----|----------------|
| CAAAGTAGGATGAGACAGGGGCGC   | 0  | 14 | RDR2-sensitive |
| CAAAGTAGGATGAGTCGGGGACGC   | 0  | 9  | RDR2-sensitive |
| CAAAGTAGGATGAGTCGGGGGCGC   | 0  | 49 | RDR2-sensitive |
| CAAAGTATGATGAGTCGGGGGCGC   | 0  | 9  | RDR2-sensitive |
| CAAAGTCTTCGTCACTGTAACGGT   | 0  | 9  | RDR2-sensitive |
| CAAAGTGAGACGAGGCATGGACGA   | 0  | 15 | RDR2-sensitive |
| CAAAGTTGACTGAGAGACGATGGC   | 0  | 9  | RDR2-sensitive |
| CAAAGTTGACTGGGAGACGACGAC   | 0  | 19 | RDR2-sensitive |
| CAAAGTTGACTGGGAGACGACGGC   | 4  | 37 | RDR2-sensitive |
| CAAATAACTGTAGAATGGACGGTT   | 0  | 9  | RDR2-sensitive |
| CAAATAAGCGGGTCTGGGCTCGGAC  | 0  | 18 | RDR2-sensitive |
| CAAATAGGACCACCATGCAGGCAT   | 0  | 9  | RDR2-sensitive |
| CAAATATTCGGCGAAGGACGGCTC   | 0  | 15 | RDR2-sensitive |
| CAAATCGTTCGTCTGACTTGGGTA   | 44 | 6  | RDR2-resistant |
| CAAATGACGTGGGACTGGTTGCAT   | 0  | 12 | RDR2-sensitive |
| CAAATGGGCTGGACTGGATTCCGGC  | 0  | 21 | RDR2-sensitive |
| CAAATGGTTTTGGGTCCTTTGGCA   | 15 | 0  | RDR2-resistant |
| CAAATGTCTGATCGTTTGGAGGGA   | 26 | 2  | RDR2-resistant |
| CAAATTGAGCACTGGACTGGACGG   | 0  | 17 | RDR2-sensitive |
| CAAATTGCGTCGCGACCGAGCGGA   | 0  | 10 | RDR2-sensitive |
| CAAATTTTCGTGGAGCTGGAGCGGT  | 0  | 25 | RDR2-sensitive |
| CAAATTTGAACTACTAGGCGACAA   | 0  | 9  | RDR2-sensitive |
| CAAATTTGTAATAACGGACGACAT   | 0  | 14 | RDR2-sensitive |
| CAACAAAACGTTGTATATGTGGAC   | 0  | 9  | RDR2-sensitive |
| CAACAAAACACTAGGACAGAACGGCT | 0  | 11 | RDR2-sensitive |
| CAACAAAACGTAGCGGACCAGCAG   | 0  | 12 | RDR2-sensitive |
| CAACAATCCACTCTGCAACGGCCT   | 0  | 9  | RDR2-sensitive |
| CAACACATTTTTTCGATTGTCCGGA  | 17 | 0  | RDR2-resistant |
| CAACACTGTGCTGTGGATCCACGA   | 0  | 15 | RDR2-sensitive |
| CAACAGCAGTAGGGACGTGAGAAG   | 0  | 24 | RDR2-sensitive |
| CAACAGCTCGACTCGGACCGGCAT   | 2  | 66 | RDR2-sensitive |
| CAACAGTTGTGATTCCGGTATGGCT  | 49 | 0  | RDR2-resistant |
| CAACATGTGCGGACTGTCCGGCTT   | 0  | 12 | RDR2-sensitive |
| CAACCAAACCTTCACGCGTCGGGTC  | 0  | 11 | RDR2-sensitive |
| CAACCAAAGGACTGGATCTAGGAA   | 0  | 9  | RDR2-sensitive |
| CAACCAAAGGGCTGGATCCAGGAA   | 5  | 61 | RDR2-sensitive |
| CAACCAAAGGGCTGGATTCAGGAA   | 1  | 21 | RDR2-sensitive |
| CAACCAGAAGGACGACCGAAGACA   | 0  | 10 | RDR2-sensitive |
| CAACCAGAAGGACGACCGAAGACT   | 0  | 40 | RDR2-sensitive |
| CAACCATAGTTGACTGGGAGACGA   | 0  | 10 | RDR2-sensitive |
| CAACCATCCATTCTGTAACGGCTC   | 0  | 9  | RDR2-sensitive |
| CAACCCACACCTAGAATTCGTCGT   | 0  | 11 | RDR2-sensitive |
| CAACCCATCTGGGCAGGGGCACGC   | 0  | 11 | RDR2-sensitive |
| CAACCCGTTCCGGCCGACAGTCAC   | 0  | 16 | RDR2-sensitive |
| CAACCCTGTAGAGCGCGGCGAGGT   | 0  | 9  | RDR2-sensitive |
| CAACCGAAGGATAGAGCAGACGAG   | 0  | 17 | RDR2-sensitive |
| CAACCGGAGGATGACGTACATGAC   | 0  | 11 | RDR2-sensitive |
| CAACCGGGAACAGACTGAGATGGT   | 0  | 9  | RDR2-sensitive |
| CAACCGTAGAGCCAGAGGCAAGGA   | 0  | 14 | RDR2-sensitive |

|                            |    |    |                |
|----------------------------|----|----|----------------|
| CAACCGTTAGGGTTCGACCGTTGG   | 0  | 9  | RDR2-sensitive |
| CAACCTACTCCTTGGACTACGGCG   | 0  | 39 | RDR2-sensitive |
| CAACCTTGCCAAGACTGTCGTCGT   | 0  | 18 | RDR2-sensitive |
| CAACGAATTTTATAGAAGCTGGCT   | 1  | 24 | RDR2-sensitive |
| CAACGACTGCAGCGAAGGCCTCGA   | 2  | 28 | RDR2-sensitive |
| CAACGACTGTACAGATTGCGCCAC   | 0  | 17 | RDR2-sensitive |
| CAACGAGAGATGGGACGGGATCAA   | 0  | 17 | RDR2-sensitive |
| CAACGAGGGATGGGACGGGATCAA   | 0  | 16 | RDR2-sensitive |
| CAACGATACTGCAGAATCGGGCAT   | 0  | 17 | RDR2-sensitive |
| CAACGATATGTTGTGTCGTCGGTAGC | 0  | 15 | RDR2-sensitive |
| CAACGATGGATTCTGCAGGGACAG   | 0  | 9  | RDR2-sensitive |
| CAACGCGACTCTGTCAGGAACGGA   | 0  | 24 | RDR2-sensitive |
| CAACGCGTCTGAGACTGTTGCGGTG  | 0  | 9  | RDR2-sensitive |
| CAACGGAACGATGGGACGACGCAA   | 0  | 11 | RDR2-sensitive |
| CAACGGAACGCGGACTCGGCGCAC   | 0  | 23 | RDR2-sensitive |
| CAACGGAACGTGTGATGGTTTAAAC  | 14 | 0  | RDR2-resistant |
| CAACGGAAGGTAGATGACCGGCGC   | 0  | 17 | RDR2-sensitive |
| CAACGGACCATTACGAGACGCGT    | 0  | 11 | RDR2-sensitive |
| CAACGGACGAGGGTTGCAATCAAC   | 3  | 19 | RDR2-sensitive |
| CAACGGAGACAAGACAACGGGCAG   | 2  | 16 | RDR2-sensitive |
| CAACGGAGACAAGACGACGGACAG   | 0  | 13 | RDR2-sensitive |
| CAACGGAGACAAGACGACTGGCAG   | 1  | 16 | RDR2-sensitive |
| CAACGGGGAGTAGGTTTGAAGAA    | 3  | 21 | RDR2-sensitive |
| CAACGGTCGGAAGGGGGCACC GGA  | 6  | 24 | RDR2-sensitive |
| CAACGGTCGGCTGACGTGGCGTGC   | 1  | 29 | RDR2-sensitive |
| CAACGGTCGGCTGGGCCAACGGTC   | 1  | 16 | RDR2-sensitive |
| CAACGGTCGGTCGGGCCAACGGTC   | 1  | 14 | RDR2-sensitive |
| CAACGGTCTGCTGACGTGGCTGGC   | 0  | 29 | RDR2-sensitive |
| CAACGTAGAGCATGACCGGCTGGT   | 52 | 1  | RDR2-resistant |
| CAACGTAGAGTTGTAGTTGCGGAC   | 35 | 1  | RDR2-resistant |
| CAACGTATCTCTGAGGTCGTCGT    | 0  | 12 | RDR2-sensitive |
| CAACGTGACTGTACGGGACGGACA   | 0  | 12 | RDR2-sensitive |
| CAACGTGTGGGGAGTGTGGACGAA   | 23 | 1  | RDR2-resistant |
| CAACGTTAGGTTGTAGAGGGCGTT   | 0  | 10 | RDR2-sensitive |
| CAACTAAAGGGCTGGATCCAGGAA   | 0  | 16 | RDR2-sensitive |
| CAACTAAGAGACTCTATTGTACAA   | 0  | 14 | RDR2-sensitive |
| CAACTACTCTTTTGGACGCTGTGA   | 82 | 10 | RDR2-resistant |
| CAACTAGGGATGGAACGGGATCAA   | 0  | 12 | RDR2-sensitive |
| CAACTATAGACGGCTGCTGACGGT   | 0  | 11 | RDR2-sensitive |
| CAACTATTTATTGACTGGGCAAT    | 18 | 1  | RDR2-resistant |
| CAACTCAGCCTGTAGTGTGCGGCC   | 1  | 42 | RDR2-sensitive |
| CAACTCATCTCGGACCATCGCATG   | 0  | 36 | RDR2-sensitive |
| CAACTCATCTGGACAGGGGCACGC   | 0  | 14 | RDR2-sensitive |
| CAACTCATCTGGGCAGGGACACGC   | 0  | 31 | RDR2-sensitive |
| CAACTCGGACTCCGCAAGACGGAC   | 0  | 18 | RDR2-sensitive |
| CAACTCGGAGACGACGACGGGCAC   | 0  | 14 | RDR2-sensitive |
| CAACTCGGAGACGACGACTGGCAC   | 0  | 29 | RDR2-sensitive |
| CAACTCGGAGGCATCACGTAGGGA   | 0  | 13 | RDR2-sensitive |
| CAACTCGGCTCGGCTCGAAGCGGC   | 36 | 1  | RDR2-resistant |

|                           |    |     |                |
|---------------------------|----|-----|----------------|
| CAACTCGGCTCGGCTCGGATCGGC  | 0  | 9   | RDR2-sensitive |
| CAACTCGGGAAGGCGACGAACAGC  | 0  | 10  | RDR2-sensitive |
| CAACTCTAGGTGGACACGCGTAT   | 0  | 14  | RDR2-sensitive |
| CAACTCTCTTGATCGTAACTCGGA  | 27 | 0   | RDR2-resistant |
| CAACTCTTCAACCCGCAACGACGT  | 0  | 9   | RDR2-sensitive |
| CAACTCTTCGTCAAGCCGGCAGGT  | 0  | 10  | RDR2-sensitive |
| CAACTCTTCGTACGTCGGCAGGT   | 0  | 12  | RDR2-sensitive |
| CAACTCTTGAACCCGCAACGACGT  | 0  | 66  | RDR2-sensitive |
| CAACTGCACGAGCAGACGCCGGGC  | 27 | 0   | RDR2-resistant |
| CAACTGCCACTCTGCAACGGTAT   | 0  | 16  | RDR2-sensitive |
| CAACTGCTGTGCTGTATGACGGAT  | 0  | 10  | RDR2-sensitive |
| CAACTGCTGTGAAATGGCTGGCG   | 28 | 2   | RDR2-resistant |
| CAACTGGAAGTGGAGCCCGGCCTT  | 28 | 3   | RDR2-resistant |
| CAACTGGCAGATACTCCCAAGGGA  | 0  | 10  | RDR2-sensitive |
| CAACTGTAGACGGCTGCTGACGAC  | 0  | 21  | RDR2-sensitive |
| CAACTGTCCACTCTGCAACGGCCC  | 2  | 176 | RDR2-sensitive |
| CAACTGTCCACTCTGCAACGGCCT  | 1  | 16  | RDR2-sensitive |
| CAACTGTCCACTCTGCAACGGCTC  | 1  | 23  | RDR2-sensitive |
| CAACTGTCCACTCTGGAACGGCCC  | 0  | 36  | RDR2-sensitive |
| CAACTGTCTACTCTACAACGGCCC  | 0  | 31  | RDR2-sensitive |
| CAACTGTCTTTAATGTCGTCGGTT  | 0  | 10  | RDR2-sensitive |
| CAACTGTGGGACGGCTGCAGGTGT  | 0  | 11  | RDR2-sensitive |
| CAACTGTTCACTCTGCAACGGCCC  | 0  | 35  | RDR2-sensitive |
| CAACTTAAGGGCTATTGACGTCGA  | 31 | 2   | RDR2-resistant |
| CAACTTTCTTGTTTTATTTCGGACC | 19 | 0   | RDR2-resistant |
| CAAGAAGTCTGAGGAATTCAGGCA  | 36 | 4   | RDR2-resistant |
| CAAGAAGCTGTTGTGGACTGGCAA  | 0  | 13  | RDR2-sensitive |
| CAAGAATCGAACTCGGGTAGGCAT  | 0  | 15  | RDR2-sensitive |
| CAAGAATCGGCTCGGAGACGACAA  | 0  | 39  | RDR2-sensitive |
| CAAGAATGTGATCTATGGCAAGGA  | 21 | 2   | RDR2-resistant |
| CAAGACACACGCTAGGATCTCGGA  | 0  | 9   | RDR2-sensitive |
| CAAGACATGTATCTTGACGAAGAC  | 0  | 17  | RDR2-sensitive |
| CAAGACATGTTACCTCGACGTCAT  | 1  | 43  | RDR2-sensitive |
| CAAGACGGGACGGGATGAAACGAT  | 0  | 11  | RDR2-sensitive |
| CAAGACGGGATGGGACAGGACGAT  | 0  | 17  | RDR2-sensitive |
| CAAGACTGGACGGTCCATGAGCAG  | 0  | 29  | RDR2-sensitive |
| CAAGACTGGAGGACCTGCCGGCGT  | 0  | 12  | RDR2-sensitive |
| CAAGACTTCGGATCGGTTTTGGGC  | 30 | 2   | RDR2-resistant |
| CAAGAGCGGAAGAACTACGGCGT   | 0  | 15  | RDR2-sensitive |
| CAAGAGCTGGCCGACTCATGGCAT  | 0  | 11  | RDR2-sensitive |
| CAAGATCCAGGTAAGTTCGGCGA   | 0  | 11  | RDR2-sensitive |
| CAAGATCCGGTAGCACGAGACGT   | 0  | 14  | RDR2-sensitive |
| CAAGCAACGGACACACCTTCGGCT  | 0  | 17  | RDR2-sensitive |
| CAAGCAATCGGTCTTTCTTCTGCT  | 19 | 0   | RDR2-resistant |
| CAAGCACGAGATTCTGATTGGTTG  | 0  | 12  | RDR2-sensitive |
| CAAGCACGGCACTAGACTCGTGTC  | 1  | 19  | RDR2-sensitive |
| CAAGCACGTGAGCTCTCGTATGGC  | 0  | 12  | RDR2-sensitive |
| CAAGCACGTTGGGGTAGGCTAGAG  | 0  | 17  | RDR2-sensitive |
| CAAGCACTCGGCAAACATGGCTCT  | 0  | 45  | RDR2-sensitive |



|                           |    |     |                |
|---------------------------|----|-----|----------------|
| CAAGCAGACTGTTGCGCGACCTCA  | 0  | 21  | RDR2-sensitive |
| CAAGCAGATCTGGGACACCCTCAA  | 7  | 66  | RDR2-sensitive |
| CAAGCAGGCTGATCGAATTTGGAA  | 23 | 1   | RDR2-resistant |
| CAAGCAGTCTCGGATGAAGTGGTA  | 57 | 6   | RDR2-resistant |
| CAAGCATAACGGATACGGAGGGCGT | 0  | 16  | RDR2-sensitive |
| CAAGCATCGTGAAGTGTCCGGCAC  | 0  | 26  | RDR2-sensitive |
| CAAGCATTAGGTCGTTTCTGAGAC  | 0  | 15  | RDR2-sensitive |
| CAAGCCCGCCCGCTTATTCTACCG  | 0  | 15  | RDR2-sensitive |
| CAAGCCCGCGGACTTAGACGGCCC  | 0  | 15  | RDR2-sensitive |
| CAAGCCGACTGCAGACGCTATCAG  | 0  | 16  | RDR2-sensitive |
| CAAGCCGAGGGACGAGTAGGCTAT  | 0  | 10  | RDR2-sensitive |
| CAAGCCTACGTAGAACTGGGTCGT  | 0  | 41  | RDR2-sensitive |
| CAAGCGAGACGAGGTGAACACCAG  | 0  | 11  | RDR2-sensitive |
| CAAGCGAGGATCTAGAGGAGCCGT  | 0  | 10  | RDR2-sensitive |
| CAAGCGCGCTGTTGGAGCACGGTC  | 0  | 9   | RDR2-sensitive |
| CAAGCGGACCGCCTGATACGGCAC  | 0  | 9   | RDR2-sensitive |
| CAAGCGGAGACGAGGTGAACACAA  | 1  | 50  | RDR2-sensitive |
| CAAGCGGTAGACTTTTTACATCAC  | 0  | 23  | RDR2-sensitive |
| CAAGCGGTAGGATTTTTACATCAC  | 0  | 13  | RDR2-sensitive |
| CAAGCGTTGTACGGATGCAGTGCG  | 0  | 13  | RDR2-sensitive |
| CAAGCTAACACAACCTCGGCGTCAT | 0  | 11  | RDR2-sensitive |
| CAAGCTAAGCGGACCGGTAAGCAC  | 0  | 42  | RDR2-sensitive |
| CAAGCTAGATCTCGCTCGTCGCAA  | 0  | 15  | RDR2-sensitive |
| CAAGCTAGCAACCGGCGCCTCTGC  | 32 | 1   | RDR2-resistant |
| CAAGCTCGGCACTACAGATCACGG  | 0  | 10  | RDR2-sensitive |
| CAAGCTCTCGGCGAAACGCGACGC  | 0  | 10  | RDR2-sensitive |
| CAAGCTCTGGACATGGCAGACTGC  | 1  | 50  | RDR2-sensitive |
| CAAGCTCTGGACATGTCAGACTGC  | 0  | 12  | RDR2-sensitive |
| CAAGCTCTTACGTGGCATCGCCGG  | 0  | 12  | RDR2-sensitive |
| CAAGCTCTTGTAGGTGTAGTCGTC  | 26 | 3   | RDR2-resistant |
| CAAGCTGCAGAGACTGATGGGCAC  | 2  | 73  | RDR2-sensitive |
| CAAGCTGCAGAGACTGATGGGCAT  | 1  | 12  | RDR2-sensitive |
| CAAGCTGCAGAGACTGATGGGCGC  | 1  | 116 | RDR2-sensitive |
| CAAGCTGCAGAGACTGGTGGACAC  | 0  | 33  | RDR2-sensitive |
| CAAGCTGCAGAGCCTGATGGGCGC  | 2  | 23  | RDR2-sensitive |
| CAAGCTGCAGAGGCTGATGGACAC  | 0  | 14  | RDR2-sensitive |
| CAAGCTGTGTTACCTCGACGTCAC  | 0  | 46  | RDR2-sensitive |
| CAAGCTGTGTTACCTCGGCGCCAT  | 0  | 14  | RDR2-sensitive |
| CAAGGAACAGTAGATGTCCGGTGT  | 0  | 19  | RDR2-sensitive |
| CAAGGAACCCTGTGGTGCGGTCGG  | 0  | 12  | RDR2-sensitive |
| CAAGGAACTAGAGTGCAGGGACAT  | 0  | 89  | RDR2-sensitive |
| CAAGGAACTAGAGTGGAGGGACAT  | 0  | 10  | RDR2-sensitive |
| CAAGGACAACCTGTAGGTGGGCCTA | 3  | 41  | RDR2-sensitive |
| CAAGGACAACCTGTAGGTGGGCCTT | 0  | 11  | RDR2-sensitive |
| CAAGGACCAACTGAAGCGCATCAC  | 0  | 10  | RDR2-sensitive |
| CAAGGACGACGACACGGCGAGCAC  | 0  | 11  | RDR2-sensitive |
| CAAGGACGCGAACTTGAAGGGCGG  | 0  | 11  | RDR2-sensitive |
| CAAGGACTGTGGCGTCATCTCGGC  | 1  | 47  | RDR2-sensitive |
| CAAGGACTGTGGCGTCATCTTGGC  | 1  | 14  | RDR2-sensitive |

|                           |    |    |                |
|---------------------------|----|----|----------------|
| CAAGGACTGTTCAGGCAAGGACAT  | 19 | 1  | RDR2-resistant |
| CAAGGAGGAGAAGGAAGACTCGAC  | 51 | 0  | RDR2-resistant |
| CAAGGAGGGGATGGATCGAAGAAC  | 15 | 0  | RDR2-resistant |
| CAAGGATGGGGACGATGCTTTCAT  | 0  | 9  | RDR2-sensitive |
| CAAGGATTGTGGCGTCATCTCGAC  | 0  | 14 | RDR2-sensitive |
| CAAGGATTGTGGCGTCATCTCGGC  | 1  | 14 | RDR2-sensitive |
| CAAGGCACGCAGGACTGTGCAGGC  | 1  | 25 | RDR2-sensitive |
| CAAGGCACTATCGGAATTCGGCTC  | 0  | 9  | RDR2-sensitive |
| CAAGGCATACGTAGCAGCTTCGGT  | 0  | 11 | RDR2-sensitive |
| CAAGGCGTCGGTGTCTGGGCGGTA  | 24 | 3  | RDR2-resistant |
| CAAGGCTAGTGAGCGAGGAAGGCA  | 19 | 0  | RDR2-resistant |
| CAAGGCTCTTAACCTTAAGGTCGT  | 1  | 16 | RDR2-sensitive |
| CAAGGCTCTTAACCTTGTGGTCGT  | 4  | 34 | RDR2-sensitive |
| CAAGGCTGAGACGGACCATCCCC   | 0  | 11 | RDR2-sensitive |
| CAAGGCTGTCAGCGATGACGTGGT  | 0  | 10 | RDR2-sensitive |
| CAAGGCTTCTAACCTTGTGGTCGT  | 2  | 26 | RDR2-sensitive |
| CAAGGCTTTTAACCTTGTGGTCGT  | 0  | 9  | RDR2-sensitive |
| CAAGGGAGTGGAACCAGAGGACGC  | 0  | 11 | RDR2-sensitive |
| CAAGGGCAGTAGGGGAGTGGTCAG  | 1  | 15 | RDR2-sensitive |
| CAAGGGCTGACGCGACGTCGACGT  | 0  | 10 | RDR2-sensitive |
| CAAGGGGACTGTGACAAGTGGTAT  | 0  | 32 | RDR2-sensitive |
| CAAGGGGGAGACCTCACGTCGGAT  | 2  | 15 | RDR2-sensitive |
| CAAGGGGTAGAGCGAGGCGGACGA  | 0  | 12 | RDR2-sensitive |
| CAAGGTAACACTGATCGACGCCAC  | 0  | 9  | RDR2-sensitive |
| CAAGGTAGAGCGTGCTGATAACGT  | 0  | 10 | RDR2-sensitive |
| CAAGGTCAGCTTGGCTCGGCTCGG  | 0  | 13 | RDR2-sensitive |
| CAAGGTCGGTGTAGTTGACGCGCC  | 1  | 79 | RDR2-sensitive |
| CAAGGTCTCGAACGGCAAGGGCTT  | 3  | 23 | RDR2-sensitive |
| CAAGGTCTCGAACGGCACCCGGCTT | 1  | 28 | RDR2-sensitive |
| CAAGGTCTGACGTGGCATCAACGG  | 0  | 9  | RDR2-sensitive |
| CAAGGTGCAGAGACTGATGGGCAC  | 0  | 9  | RDR2-sensitive |
| CAAGGTGGTGGAAAGGAGGCGTGGA | 20 | 1  | RDR2-resistant |
| CAAGGTGGTGTGTAGAGATGGCAC  | 0  | 19 | RDR2-sensitive |
| CAAGGTGTGTCTCAAGGTCGCCGG  | 0  | 18 | RDR2-sensitive |
| CAAGGTTAGCCTCGGACGAGTCAT  | 0  | 22 | RDR2-sensitive |
| CAAGGTTTCGTAGAGCAGGAGGGG  | 0  | 24 | RDR2-sensitive |
| CAAGTACGACAGGCCGATGATCAT  | 0  | 11 | RDR2-sensitive |
| CAAGTACTCGGTATGCAGGGGCGA  | 0  | 31 | RDR2-sensitive |
| CAAGTAGAACGGAGCCGTTCCATC  | 0  | 16 | RDR2-sensitive |
| CAAGTAGAACGGAGCCGTTCTGTC  | 0  | 10 | RDR2-sensitive |
| CAAGTAGAGGCGAGTTGAACCCGA  | 0  | 36 | RDR2-sensitive |
| CAAGTCAAGCTAGAGCCGGATCAT  | 0  | 13 | RDR2-sensitive |
| CAAGTCAAGTTAGGGCCGGATCAT  | 0  | 24 | RDR2-sensitive |
| CAAGTCAGCGTGAACAGTACGGGA  | 2  | 21 | RDR2-sensitive |
| CAAGTCAGGACTCGCCACGGGCGG  | 38 | 0  | RDR2-resistant |
| CAAGTCAGTTGTAGTAGTAGGCTC  | 0  | 9  | RDR2-sensitive |
| CAAGTCCGCGGACTTAGACGGCCC  | 2  | 21 | RDR2-sensitive |
| CAAGTCCTGTAGACTGTCCGGTGT  | 0  | 47 | RDR2-sensitive |
| CAAGTCGTGCTCGGGCTGGGCCGG  | 0  | 10 | RDR2-sensitive |

|                           |     |    |                |
|---------------------------|-----|----|----------------|
| CAAGTGAAATGTATGAACAGGTAT  | 0   | 11 | RDR2-sensitive |
| CAAGTGGGAACCTCCGCGTCGGCGC | 0   | 59 | RDR2-sensitive |
| CAAGTG TAGCTCTGCGGACGGTGA | 0   | 11 | RDR2-sensitive |
| CAAGTG TAGGATCTCGAAGGCGAC | 0   | 17 | RDR2-sensitive |
| CAAGTG TATCTCTGCGGACGACGA | 0   | 11 | RDR2-sensitive |
| CAAGTTACGGAGAGCTGACGTCAT  | 66  | 0  | RDR2-resistant |
| CAAGTTAGCGCTGTGTGACGGTGA  | 0   | 23 | RDR2-sensitive |
| CAAGTTCTACTGTAGTCATGGCAT  | 1   | 12 | RDR2-sensitive |
| CAAGTTGCAGCACTAGTAGGCGGT  | 0   | 24 | RDR2-sensitive |
| CAAGTTGGCGAGCGAAGC GGAGGC | 2   | 34 | RDR2-sensitive |
| CAAGTTGGGTTTGTCTGGGTCGGGC | 0   | 15 | RDR2-sensitive |
| CAATACGTACGTAGGACAGGCCGG  | 0   | 13 | RDR2-sensitive |
| CAATAGCTGGACGGCCTGGTACAT  | 0   | 20 | RDR2-sensitive |
| CAATATAGTCGTTACTGGTATGGC  | 0   | 9  | RDR2-sensitive |
| CAATATGTTATCTTGTCGGATGTT  | 19  | 1  | RDR2-resistant |
| CAATATTATGTACGGCTATTGAAC  | 17  | 0  | RDR2-resistant |
| CAATCACTGCGTGAGAACCGACGG  | 0   | 9  | RDR2-sensitive |
| CAATCCATCCGGGCAGGGACACGC  | 0   | 11 | RDR2-sensitive |
| CAATCGAACTGGGCTGGCACGGAC  | 0   | 12 | RDR2-sensitive |
| CAATCGCGTCGTCGATCTCGTCGT  | 0   | 18 | RDR2-sensitive |
| CAATCGGAAAGGCAGTAGTCGCAT  | 0   | 10 | RDR2-sensitive |
| CAATCGGACGGGTAGTACACGGAT  | 0   | 13 | RDR2-sensitive |
| CAATCGGGCGGGTAGAACCGCGGAT | 0   | 16 | RDR2-sensitive |
| CAATCGGGCGGGTAGTACACGGAT  | 1   | 52 | RDR2-sensitive |
| CAATCGGGTGGGTAGTACCGGAT   | 0   | 36 | RDR2-sensitive |
| CAATCGTATGAGTGGGCAGGGACG  | 0   | 19 | RDR2-sensitive |
| CAATCGTGATATCGGAGGAGGGTT  | 55  | 1  | RDR2-resistant |
| CAATCGTTGGGCCGCATACACCGC  | 0   | 14 | RDR2-sensitive |
| CAATCTGGCTTATGAAACGGTGAC  | 153 | 9  | RDR2-resistant |
| CAATCTTGTAGAACAGATGGCAGA  | 17  | 0  | RDR2-resistant |
| CAATCTTTTCGGATCGGCTGGCCAC | 0   | 12 | RDR2-sensitive |
| CAATCTTTTTGGAGAGCTCGACGG  | 20  | 1  | RDR2-resistant |
| CAATGACAGGACGGGATGGGACGG  | 0   | 12 | RDR2-sensitive |
| CAATGACATGTGGGGTCCATGGTA  | 0   | 10 | RDR2-sensitive |
| CAATGCAGGCTATAGTGAGGACGA  | 0   | 11 | RDR2-sensitive |
| CAATGCCAAGCAGATCTGGGACAC  | 0   | 9  | RDR2-sensitive |
| CAATGGAAGTTGGCTGCGAGCATA  | 3   | 17 | RDR2-sensitive |
| CAATGGACCAAGCTTCAGTAGACC  | 41  | 6  | RDR2-resistant |
| CAATGGACTGGACAGGCACGCCGC  | 1   | 14 | RDR2-sensitive |
| CAATGGACTTAGACGGTGCTACAA  | 0   | 14 | RDR2-sensitive |
| CAATGGACTTCTCGCGACGTCGGG  | 104 | 40 | RDR2-resistant |
| CAATGGAGTGGATGTACCGCGCAT  | 0   | 11 | RDR2-sensitive |
| CAATGTAGGCTATAGCGAGGGCGA  | 0   | 10 | RDR2-sensitive |
| CAATTCAGCCTGTAGTGTCGGCCC  | 0   | 22 | RDR2-sensitive |
| CAATTCGGCGGGTAGTACACGGAT  | 0   | 14 | RDR2-sensitive |
| CAATTCTCTGAACGGGCTCGGCAC  | 0   | 24 | RDR2-sensitive |
| CAATTGATGATCGTTCTTTTTGGC  | 27  | 3  | RDR2-resistant |
| CAATTGGATGCATGAGCGGGGACG  | 0   | 9  | RDR2-sensitive |
| CAATTGTCTACTCTGTAACGGTCC  | 0   | 11 | RDR2-sensitive |

|                            |    |     |                |
|----------------------------|----|-----|----------------|
| CAATTGTTGATGTGGAACAATCGG   | 70 | 13  | RDR2-resistant |
| CAATTGTTTATTTAATCGGGCATT   | 23 | 1   | RDR2-resistant |
| CAATTTTGTGGATTAGATGTGGG    | 19 | 0   | RDR2-resistant |
| CACAAAGCTGACTGGGAGACGCCA   | 0  | 22  | RDR2-sensitive |
| CACAAATAAGCGGGTCGGGCTCGG   | 0  | 9   | RDR2-sensitive |
| CACAAATAATTTGTGTGTCGTCGC   | 0  | 9   | RDR2-sensitive |
| CACAACGTCAGCAACGGTCGTCGT   | 0  | 14  | RDR2-sensitive |
| CACAACGTGGAAGTAGGCAAGTGT   | 0  | 31  | RDR2-sensitive |
| CACAACACTACAAGCCGGGTTAGCGT | 0  | 10  | RDR2-sensitive |
| CACAACCTCCGTTGGACTACGGGTG  | 24 | 2   | RDR2-resistant |
| CACAACCTCTGAACCTCGACGACAC  | 0  | 9   | RDR2-sensitive |
| CACAAGACGAAGGCCTGCGGTGAC   | 0  | 10  | RDR2-sensitive |
| CACAAGACTGACTCAGAGGGGCTG   | 0  | 12  | RDR2-sensitive |
| CACAAGTCCGGACTGGTGCGGCTT   | 4  | 32  | RDR2-sensitive |
| CACAAGTGGAGGACCCCTAGACTAA  | 36 | 2   | RDR2-resistant |
| CACAATTGGTCATCGCGCTTGGTT   | 15 | 0   | RDR2-resistant |
| CACACACTGCTGGACTGGACGCAT   | 0  | 94  | RDR2-sensitive |
| CACACAGACTGGACCTGAGCGCGG   | 0  | 14  | RDR2-sensitive |
| CACACATGCAGAGGACACGGGAAA   | 0  | 18  | RDR2-sensitive |
| CACACATGTAGACAGTTGGCGCGT   | 0  | 15  | RDR2-sensitive |
| CACACCGCGCACTGTAGACGACGG   | 0  | 25  | RDR2-sensitive |
| CACACCGGACAAGGAACAGTGCAT   | 0  | 17  | RDR2-sensitive |
| CACACGACGGACACCAAGCGGGGA   | 1  | 12  | RDR2-sensitive |
| CACACGCTGGACGAACGAGATCGG   | 0  | 11  | RDR2-sensitive |
| CACACGTAGACACTCGGTGAAGAC   | 0  | 15  | RDR2-sensitive |
| CACACGTAGAGCCGCAGGGACACA   | 0  | 15  | RDR2-sensitive |
| CACACGTTACGTGCGAGATCTCGG   | 0  | 11  | RDR2-sensitive |
| CACACGTTGGACTGTTCCGGTGCAT  | 0  | 18  | RDR2-sensitive |
| CACACTCGGCAAAGAACGCTCGGC   | 0  | 25  | RDR2-sensitive |
| CACACTGAGCGGTATGCAACTCCC   | 0  | 11  | RDR2-sensitive |
| CACACTGCAGAGGCTTGGACGGAC   | 0  | 15  | RDR2-sensitive |
| CACACTGTAGTAAGGGGTACCCAT   | 0  | 11  | RDR2-sensitive |
| CACACTTATGTCTGATGGTTGGAC   | 15 | 0   | RDR2-resistant |
| CACACTTTGCCTAAGGTTAGTCGT   | 1  | 12  | RDR2-sensitive |
| CACAGACTCCGGTGAACAGGACGC   | 0  | 10  | RDR2-sensitive |
| CACAGACTGGACCTGAGCGCGGCT   | 0  | 19  | RDR2-sensitive |
| CACAGACTGTAGGTTGGAGACGAG   | 0  | 9   | RDR2-sensitive |
| CACAGAGCGGTAGGGGTGGAGGGC   | 88 | 0   | RDR2-resistant |
| CACAGCAGTTCGGCTCGGCTCGGA   | 1  | 23  | RDR2-sensitive |
| CACAGCTCGAACGACGTGTGGCAT   | 3  | 147 | RDR2-sensitive |
| CACAGGACGACACTCGGCAAAGAC   | 0  | 20  | RDR2-sensitive |
| CACAGGACTCAGGAAGAGAGACGA   | 0  | 18  | RDR2-sensitive |
| CACAGGAGCCTGAGCCGGGGGAAG   | 17 | 0   | RDR2-resistant |
| CACAGGAGCGACATGAACACCGGA   | 0  | 12  | RDR2-sensitive |
| CACAGGCACTGGTGGAGATGGCGA   | 0  | 9   | RDR2-sensitive |
| CACAGGTAGGCACTCGGCAAAGAC   | 1  | 24  | RDR2-sensitive |
| CACAGTAGAATAAGCGGACGGGCT   | 0  | 12  | RDR2-sensitive |
| CACAGTAGAATAAGCGGGCGGGCT   | 0  | 10  | RDR2-sensitive |
| CACAGTAGAGCGCATGATTGGCTT   | 0  | 38  | RDR2-sensitive |

|                            |    |    |                |
|----------------------------|----|----|----------------|
| CACAGTAGGACGAGCACCGGCGAT   | 0  | 12 | RDR2-sensitive |
| CACAGTCAGAGAGACAGGGGACGC   | 0  | 12 | RDR2-sensitive |
| CACAGTCGGTGCACCACAAGCGGT   | 1  | 33 | RDR2-sensitive |
| CACAGTCGTGTGCTGACGCGGTCA   | 0  | 9  | RDR2-sensitive |
| CACATAAAACCGGGCTGTGTCCGA   | 0  | 22 | RDR2-sensitive |
| CACATACACGTTTGGACCACGCAT   | 0  | 11 | RDR2-sensitive |
| CACATCGACGACTGTAGTGGGTGT   | 0  | 34 | RDR2-sensitive |
| CACATCGACTGTTCAGAGGGCCGC   | 0  | 15 | RDR2-sensitive |
| CACATCGGCATGTACTTAGGGCGC   | 3  | 18 | RDR2-sensitive |
| CACATCGTCCGATGGGTGAAGGGTA  | 21 | 2  | RDR2-resistant |
| CACATCTAGGATGCGTGCGGCGTC   | 0  | 9  | RDR2-sensitive |
| CACATCTTAGGACTTAGGGCGGGT   | 0  | 20 | RDR2-sensitive |
| CACATGCGTCGCTGTGTTCCGCAA   | 1  | 22 | RDR2-sensitive |
| CACATGTTCCGGTGACTGCGGCTAG  | 0  | 12 | RDR2-sensitive |
| CACCAAATGAGCGGACGGTCCGG    | 1  | 28 | RDR2-sensitive |
| CACCAAATTGAGCGGGCGGACGGT   | 1  | 23 | RDR2-sensitive |
| CACCAATGACTGGAAGTAGGGACG   | 0  | 10 | RDR2-sensitive |
| CACCACCACTTCGTCAGGACGCAT   | 0  | 10 | RDR2-sensitive |
| CACCACGGACAGTCCGGACCGCGG   | 0  | 11 | RDR2-sensitive |
| CACCACGTGACTGCTACGCCGAA    | 0  | 25 | RDR2-sensitive |
| CACCACTCGCTGGATTGGGTTCGT   | 0  | 13 | RDR2-sensitive |
| CACCAGACTGTGCGAGCAGAGCGT   | 0  | 13 | RDR2-sensitive |
| CACCAGCCCGGCTATAGCGCGCAT   | 0  | 9  | RDR2-sensitive |
| CACCAGGACGTAGGGTGTTACGCA   | 0  | 9  | RDR2-sensitive |
| CACCAGTTTCAACGGTCGTCGTGC   | 0  | 13 | RDR2-sensitive |
| CACCATATTGAGCGGGCGGACGGT   | 0  | 11 | RDR2-sensitive |
| CACCATTACTIONGGAGATGGTCGGC | 0  | 10 | RDR2-sensitive |
| CACCATTTGTGGCACTGAGCACGG   | 0  | 18 | RDR2-sensitive |
| CACCCAAGACGGATCTAGACGACG   | 5  | 44 | RDR2-sensitive |
| CACCCACGTCTGGACCTGCGCGGC   | 0  | 10 | RDR2-sensitive |
| CACCCCATGATCGAAGCGGAGGCA   | 0  | 37 | RDR2-sensitive |
| CACCCCATTCTCGGCAGAGGGCGT   | 3  | 23 | RDR2-sensitive |
| CACCCCGTCAGGGCTTGTTCCGGTT  | 0  | 13 | RDR2-sensitive |
| CACCCCTCCGGTCGTTGACGTCAT   | 0  | 20 | RDR2-sensitive |
| CACCCCTCCGGTCGTTGACGTCGT   | 0  | 10 | RDR2-sensitive |
| CACCCGACGGACTGTCCGGTGCAT   | 0  | 15 | RDR2-sensitive |
| CACCCGGCACGAACTCGGCCCGAA   | 0  | 9  | RDR2-sensitive |
| CACCCTGACTGTTCCGATAACGGTT  | 0  | 9  | RDR2-sensitive |
| CACCGAAGACTGGAAGTAGGGACG   | 0  | 10 | RDR2-sensitive |
| CACCGAAGGCAGAACCAGGGGACA   | 0  | 9  | RDR2-sensitive |
| CACCGAAGGCAGAACCAGGGGAGG   | 0  | 14 | RDR2-sensitive |
| CACCGACCAGGTGCTCTGACCGGC   | 1  | 57 | RDR2-sensitive |
| CACCGACTCGGACGTCATCGGCCG   | 0  | 10 | RDR2-sensitive |
| CACCGACTCGGATGTCATCGGCCG   | 11 | 43 | RDR2-sensitive |
| CACCGAGACTGCATGCGTGGACGT   | 0  | 39 | RDR2-sensitive |
| CACCGATATCGTCGACAAGGTCGG   | 0  | 11 | RDR2-sensitive |
| CACCGATCTCTCGGACTGGCGTC    | 0  | 11 | RDR2-sensitive |
| CACCGATGACTGGAAGTAGGGACG   | 1  | 15 | RDR2-sensitive |
| CACCGCAGACGACTCACCGGACAG   | 0  | 10 | RDR2-sensitive |

|                           |    |    |                |
|---------------------------|----|----|----------------|
| CACCGCGACGTGGACAGCCAGCAC  | 0  | 9  | RDR2-sensitive |
| CACCGCGGCTGGCATAGTGCACAC  | 0  | 34 | RDR2-sensitive |
| CACCGCGTTCGACGTAGGAACGGTG | 0  | 19 | RDR2-sensitive |
| CACCGGACAATCACTGTAGACGGT  | 0  | 10 | RDR2-sensitive |
| CACCGGACACTGAACAGTAGATGT  | 0  | 21 | RDR2-sensitive |
| CACCGGACACTGCACAGTAGATGT  | 0  | 21 | RDR2-sensitive |
| CACCGGACAGAACTGAGGGGATGT  | 0  | 9  | RDR2-sensitive |
| CACCGGACAGGTCCTGTAGACGGT  | 1  | 24 | RDR2-sensitive |
| CACCGGACAGTCACTGTAGACGGT  | 2  | 48 | RDR2-sensitive |
| CACCGGACAGTGAACAGTAACGGA  | 0  | 10 | RDR2-sensitive |
| CACCGGACAGTGAACAGTGCAGCGG | 0  | 25 | RDR2-sensitive |
| CACCGGACATCCAGGCGGGCCCAG  | 0  | 13 | RDR2-sensitive |
| CACCGGACTGTCCGGCGTGCCCAT  | 0  | 9  | RDR2-sensitive |
| CACCGGACTGTTCCGGTGAGCCAAC | 2  | 17 | RDR2-sensitive |
| CACCGGAGGACCTGTAGAGACGGA  | 0  | 57 | RDR2-sensitive |
| CACCGGATACCCGATACCCGACGG  | 0  | 11 | RDR2-sensitive |
| CACCGGATCTGGCATGGCACACAC  | 0  | 9  | RDR2-sensitive |
| CACCGGGCTGGACGGTTCGAGTGGG | 0  | 11 | RDR2-sensitive |
| CACCGGTCGGTCTGGTGCACGGTT  | 0  | 17 | RDR2-sensitive |
| CACCGGTGAGAACGCTGAGCCGGT  | 27 | 3  | RDR2-resistant |
| CACCGTACGAGGCTTGGCATGGGC  | 25 | 1  | RDR2-resistant |
| CACCGTCCATGTTCTCATCGGCAC  | 0  | 29 | RDR2-sensitive |
| CACCGTCTGATGCGATCGAAGGTC  | 0  | 15 | RDR2-sensitive |
| CACCGTCTGTTTAACCCACGGCAA  | 0  | 20 | RDR2-sensitive |
| CACCGTTCGACCTGAGAACGGCCT  | 0  | 13 | RDR2-sensitive |
| CACCGTTCGCTGGGGGAAGAGAGC  | 22 | 1  | RDR2-resistant |
| CACCTACAGGCTGTATGGACGGAA  | 0  | 18 | RDR2-sensitive |
| CACCTAGGACACTCGACACTCGGC  | 0  | 12 | RDR2-sensitive |
| CACCTCAATCTGACTGGATGGCTG  | 0  | 22 | RDR2-sensitive |
| CACCTCTCGGAAGGGATCTGTCGG  | 0  | 13 | RDR2-sensitive |
| CACCTGGATCATGTGGAAGACGAC  | 0  | 28 | RDR2-sensitive |
| CACCTGTAAGAGCCTTTGACGGGA  | 0  | 24 | RDR2-sensitive |
| CACCTGTAAGAGCGTCGACGGAA   | 0  | 13 | RDR2-sensitive |
| CACCTGTAAGAGGCTTTTGACGGGA | 0  | 17 | RDR2-sensitive |
| CACCTGTAGCCTGACGGTGACCTC  | 0  | 9  | RDR2-sensitive |
| CACCTGTAGGGGCACGTAGATGGC  | 0  | 10 | RDR2-sensitive |
| CACCTGTCTTATATCTATGGCATG  | 14 | 0  | RDR2-resistant |
| CACCTGTGGAGCTGCGTTCCGGAT  | 0  | 10 | RDR2-sensitive |
| CACCTTCTCTGGACACGTGGCGGC  | 0  | 21 | RDR2-sensitive |
| CACCTTCTGCAGCGGAGACTGTAT  | 0  | 10 | RDR2-sensitive |
| CACGAAACTAACACGGCGGGCAA   | 0  | 10 | RDR2-sensitive |
| CACGAAAGGCAATGTAGGGCGGTT  | 0  | 14 | RDR2-sensitive |
| CACGAACACGGATAGCGGACGCAC  | 0  | 16 | RDR2-sensitive |
| CACGAAGCTCTGACGTGACGACGT  | 2  | 70 | RDR2-sensitive |
| CACGAATAAGCGGGACGGGCTCGG  | 0  | 22 | RDR2-sensitive |
| CACGAATAAGCGGGTTCGGGCTCGG | 0  | 25 | RDR2-sensitive |
| CACGAATAAGCGGGTTGGCTCGGA  | 0  | 12 | RDR2-sensitive |
| CACGACACACTGGACGGAAGAGCA  | 0  | 12 | RDR2-sensitive |
| CACGACAGATAGCACACGAGACAC  | 2  | 17 | RDR2-sensitive |

|                           |      |     |                |
|---------------------------|------|-----|----------------|
| CACGACCATGTAGCTCGGCGTCAT  | 0    | 19  | RDR2-sensitive |
| CACGACCCAACGAAGACACGACAT  | 0    | 12  | RDR2-sensitive |
| CACGACGACGATGATCCGAGCGGC  | 0    | 15  | RDR2-sensitive |
| CACGACGACTGTACAGATTACGCC  | 0    | 14  | RDR2-sensitive |
| CACGACGGATGCGGCTTCGACGAA  | 0    | 11  | RDR2-sensitive |
| CACGACGGCATGTACTTAGGGCAC  | 4    | 24  | RDR2-sensitive |
| CACGACGGCATGTACTTAGGGCGC  | 6    | 32  | RDR2-sensitive |
| CACGACTCTCGGCAACGGATATCT  | 2003 | 215 | RDR2-resistant |
| CACGACTGTATAGGATGGTATCTC  | 0    | 9   | RDR2-sensitive |
| CACGACTGTGAGCTACAACGGTGT  | 0    | 32  | RDR2-sensitive |
| CACGACTGTGTGGTTCACCGGCAT  | 1    | 15  | RDR2-sensitive |
| CACGACTTGGACACGGGAGCGGCT  | 0    | 20  | RDR2-sensitive |
| CACGAGACAGTGTAAAGACGGAGAC | 0    | 34  | RDR2-sensitive |
| CACGAGACGATGATCCGAGCGGCA  | 33   | 1   | RDR2-resistant |
| CACGAGATGGAGGCAAACCTGGCTA | 0    | 20  | RDR2-sensitive |
| CACGAGCACGGACTGGACCGGCC   | 0    | 18  | RDR2-sensitive |
| CACGAGCCCACGGACTTAGATGGC  | 0    | 21  | RDR2-sensitive |
| CACGAGCTGACGCGGCGTTCGACGT | 0    | 11  | RDR2-sensitive |
| CACGAGTGCGGACCACGAGTGCGG  | 0    | 22  | RDR2-sensitive |
| CACGAGTGTGTGACTATCGCTGCC  | 61   | 1   | RDR2-resistant |
| CACGATAGAATAAGCGGGCGGGCT  | 0    | 9   | RDR2-sensitive |
| CACGATATAGGGCTGGACGGTTCA  | 0    | 14  | RDR2-sensitive |
| CACGATCTTGTGGAGCGTGACACC  | 2    | 72  | RDR2-sensitive |
| CACGATGAGACTGGAGTAGAGGCC  | 0    | 22  | RDR2-sensitive |
| CACGATGCAGGCACGAGAACGCGT  | 0    | 10  | RDR2-sensitive |
| CACGATGGCATGTACTTAGGGCGC  | 2    | 15  | RDR2-sensitive |
| CACGATTAGTCAGGCTGGTTCGGCT | 20   | 0   | RDR2-resistant |
| CACGATTCACGACGGAACGGCGAT  | 0    | 9   | RDR2-sensitive |
| CACGCACTGAAGACATGGAGGCAC  | 4    | 27  | RDR2-sensitive |
| CACGCAGCACACTCACTCGTCGGC  | 9    | 78  | RDR2-sensitive |
| CACGCAGGACTGTGCAGGCACGGC  | 0    | 14  | RDR2-sensitive |
| CACGCATCTGATCATGGAGGACGT  | 0    | 9   | RDR2-sensitive |
| CACGCCAGACTGCTGACTGTACGG  | 1    | 12  | RDR2-sensitive |
| CACGCCGTGCGACTGGGTAGGCAG  | 0    | 35  | RDR2-sensitive |
| CACGCCTGCTAGACGAGTCGGACA  | 0    | 19  | RDR2-sensitive |
| CACGCGAAGTAGCAGAATGAGCGC  | 0    | 15  | RDR2-sensitive |
| CACGCGACAAATGGGACACACGGA  | 1    | 25  | RDR2-sensitive |
| CACGCGACGAATGGGACACACGGA  | 0    | 17  | RDR2-sensitive |
| CACGCGACTGTGGTTGTTGGGGAC  | 0    | 9   | RDR2-sensitive |
| CACGCGGAACGACGATGAGATCAT  | 0    | 9   | RDR2-sensitive |
| CACGCGGCACACTCACTCGTCGGC  | 5    | 27  | RDR2-sensitive |
| CACGCGGGACTGCCACGTCAGGAA  | 0    | 17  | RDR2-sensitive |
| CACGCGGTAGAACCACAGAAGAT   | 0    | 14  | RDR2-sensitive |
| CACGCGTGCGCGAGATCTGAAGGC  | 0    | 9   | RDR2-sensitive |
| CACGCTACAGTAGAAGGGGACCAA  | 0    | 10  | RDR2-sensitive |
| CACGCTATACTGCATGCACTCAGC  | 0    | 16  | RDR2-sensitive |
| CACGCTGTGGGCTGGGGGCGACGG  | 0    | 9   | RDR2-sensitive |
| CACGGAACTGTTGGCGTGCCAGGC  | 0    | 11  | RDR2-sensitive |
| CACGGAAGACAGTGCTAGGGAACA  | 0    | 9   | RDR2-sensitive |

|                           |    |    |                |
|---------------------------|----|----|----------------|
| CACGGAAGCGAACGAACGGTGCCAG | 0  | 10 | RDR2-sensitive |
| CACGGAAGCGAACGGATGGTACAG  | 0  | 10 | RDR2-sensitive |
| CACGGAAGGGACGCTGCATATAGC  | 0  | 11 | RDR2-sensitive |
| CACGGAATGAGCAGAACGCGGAAT  | 0  | 10 | RDR2-sensitive |
| CACGGACACGACTGGGCCCGGCAC  | 0  | 9  | RDR2-sensitive |
| CACGGACCCCTAGGACTACGGTGT  | 0  | 17 | RDR2-sensitive |
| CACGGACCGTACTGAAGCGTGCAT  | 0  | 52 | RDR2-sensitive |
| CACGGACCGTCCAAGCCCTAGGCG  | 0  | 15 | RDR2-sensitive |
| CACGGACCGTTTGAAAGCGCGCAG  | 0  | 19 | RDR2-sensitive |
| CACGGACGCGTCTGTTCACCGGTT  | 44 | 6  | RDR2-resistant |
| CACGGAGAGACGGCTCTAAGATTT  | 0  | 19 | RDR2-sensitive |
| CACGGAGCGGTATAAGGAGCAGAA  | 49 | 7  | RDR2-resistant |
| CACGGAGCTCTGACATGACGACGT  | 1  | 35 | RDR2-sensitive |
| CACGGAGGTGTGGGCATAAGAGGA  | 2  | 15 | RDR2-sensitive |
| CACGGATCTGTTAGCGTGCCGGGC  | 0  | 9  | RDR2-sensitive |
| CACGGATTAGGACTGTACCGGCCT  | 0  | 14 | RDR2-sensitive |
| CACGGATTGAAGGCCTGGAACGGT  | 0  | 10 | RDR2-sensitive |
| CACGGCAAAAATGGGTAGTGGGAT  | 16 | 0  | RDR2-resistant |
| CACGGCAAGGTGACGACGAGATA   | 0  | 9  | RDR2-sensitive |
| CACGGCACAGGCCACAAAAGCAC   | 0  | 18 | RDR2-sensitive |
| CACGGCACGGTAGAATAAGCGGGC  | 0  | 17 | RDR2-sensitive |
| CACGGCACTGGCACGGCACGGCAC  | 0  | 15 | RDR2-sensitive |
| CACGGCACTGGCACGGCATGACAC  | 0  | 13 | RDR2-sensitive |
| CACGGCATCCAGCTGGCACGGCAA  | 20 | 1  | RDR2-resistant |
| CACGGCATGAACTCGACACGGCAT  | 0  | 19 | RDR2-sensitive |
| CACGGCCAGGTGTGCGACGGTCCG  | 0  | 9  | RDR2-sensitive |
| CACGGCCCGTGAAGTGTGACGG    | 0  | 13 | RDR2-sensitive |
| CACGGCCTAGTAGACGGTGTGCC   | 0  | 31 | RDR2-sensitive |
| CACGGCGACTGGTAAAGGAGACGA  | 0  | 9  | RDR2-sensitive |
| CACGGCGTGGAATCTTTGGCGGCG  | 0  | 9  | RDR2-sensitive |
| CACGGCTAGGCACGGTAGAAGATC  | 0  | 15 | RDR2-sensitive |
| CACGGGACGGCGAAGCGGACGCTC  | 2  | 31 | RDR2-sensitive |
| CACGGGACTGCTGAAGATTAGGGT  | 0  | 16 | RDR2-sensitive |
| CACGGGAGCGAGATGTAGACGGAT  | 0  | 13 | RDR2-sensitive |
| CACGGGAGGCAGAACATGGTGCAT  | 0  | 10 | RDR2-sensitive |
| CACGGGCTGAGTTGGTGTCCCAAG  | 0  | 14 | RDR2-sensitive |
| CACGGGCTGTATGAGCGGATGCAA  | 0  | 49 | RDR2-sensitive |
| CACGGGTAAGGATACGGACAACAC  | 0  | 14 | RDR2-sensitive |
| CACGGGTAAGGATACGGGCAACAC  | 0  | 14 | RDR2-sensitive |
| CACGGGTACGGGTTTGGGACGGCA  | 0  | 20 | RDR2-sensitive |
| CACGGGTGCACGGGCTGTCCGGTG  | 1  | 22 | RDR2-sensitive |
| CACGGGTTGTAAGGGATACCAT    | 0  | 22 | RDR2-sensitive |
| CACGGTAAATTGGGCTGGCACGGC  | 0  | 9  | RDR2-sensitive |
| CACGGTACCGAGCAGGCACGACAC  | 0  | 16 | RDR2-sensitive |
| CACGGTAGAATAAACGGGCGGGCT  | 0  | 40 | RDR2-sensitive |
| CACGGTAGAATAAGCGGACGGACT  | 0  | 23 | RDR2-sensitive |
| CACGGTAGAATAAGCGGACGGGCT  | 0  | 25 | RDR2-sensitive |
| CACGGTAGAATAAGCGGGCAGGCT  | 0  | 12 | RDR2-sensitive |
| CACGGTAGAATAAGCGGGCAGGTT  | 0  | 17 | RDR2-sensitive |



|                           |    |      |                |
|---------------------------|----|------|----------------|
| CACGGTAGAATAAGCGGGCGGACT  | 0  | 18   | RDR2-sensitive |
| CACGGTAGAATAAGCGGGCGGGCT  | 21 | 1328 | RDR2-sensitive |
| CACGGTAGAATAAGCGGGCGGGGT  | 2  | 15   | RDR2-sensitive |
| CACGGTAGAATAAGCGGGCGGGTT  | 2  | 85   | RDR2-sensitive |
| CACGGTAGAATAAGTGGACGGGCT  | 0  | 15   | RDR2-sensitive |
| CACGGTAGAGAGCACGGTGAGCAC  | 0  | 19   | RDR2-sensitive |
| CACGGTCGCGTGCTGGAGCGGATA  | 0  | 9    | RDR2-sensitive |
| CACGGTCGCTGTTACGGTAGTCCT  | 0  | 27   | RDR2-sensitive |
| CACGGTGACTGGTAACGGAGACGT  | 1  | 17   | RDR2-sensitive |
| CACGGTGCTTTTGGGTAGGACGGT  | 0  | 12   | RDR2-sensitive |
| CACGGTGGAGGACGAGGAGTAGGT  | 68 | 1    | RDR2-resistant |
| CACGGTGTTGTCTCGGACGTGCGC  | 0  | 10   | RDR2-sensitive |
| CACGGTTAGAAAACCGGGTCGGGC  | 0  | 12   | RDR2-sensitive |
| CACGGTTAGAAAATCGGGTCGGAC  | 0  | 11   | RDR2-sensitive |
| CACGGTTAGGAAACCGGGTCGGGC  | 0  | 11   | RDR2-sensitive |
| CACGGTTCTGACCATATCCTTGGC  | 16 | 0    | RDR2-resistant |
| CACGGTTCTGTGACGGAGTGGTAT  | 0  | 31   | RDR2-sensitive |
| CACGGTTCTTGTTGAGTGTGGC    | 2  | 76   | RDR2-sensitive |
| CACGGTTGACTGGGAGACGATGGC  | 0  | 12   | RDR2-sensitive |
| CACGTAATGGGCGCTGTAGGGGGC  | 0  | 11   | RDR2-sensitive |
| CACGTACGGTCAGAGTAGCAGGCT  | 0  | 12   | RDR2-sensitive |
| CACGTAGAGGGCGCTGTAGGGGGC  | 3  | 20   | RDR2-sensitive |
| CACGTAGATCTGAATGTATGGCGA  | 0  | 11   | RDR2-sensitive |
| CACGTAGATGAGCTGACAGGTGGT  | 0  | 12   | RDR2-sensitive |
| CACGTAGGAGGGCGCTGTAGGGGCA | 0  | 20   | RDR2-sensitive |
| CACGTAGGAGGGCGCTGTAGGGGGC | 1  | 16   | RDR2-sensitive |
| CACGTAGGGACCGACATCAAGACG  | 0  | 27   | RDR2-sensitive |
| CACGTAGGGACCGACATCGAGACG  | 0  | 14   | RDR2-sensitive |
| CACGTAGGGAGCGCTGTAGGGGGC  | 0  | 11   | RDR2-sensitive |
| CACGTAGGGCGCTGTAGCAGGCAC  | 0  | 13   | RDR2-sensitive |
| CACGTAGGGGACGCTGTAGAGGGC  | 0  | 38   | RDR2-sensitive |
| CACGTAGGGGCGCTGTAGAGGGCA  | 0  | 30   | RDR2-sensitive |
| CACGTAGGGGGCGCTGTAGGAGGC  | 0  | 13   | RDR2-sensitive |
| CACGTAGGGGGCGCTGTAGGGGCA  | 1  | 26   | RDR2-sensitive |
| CACGTAGGGGGCGCTGTAGGGGGC  | 7  | 96   | RDR2-sensitive |
| CACGTAGTGGGCGCTGTAGGGGCA  | 0  | 23   | RDR2-sensitive |
| CACGTCACGAAGCTCGGCGCCATA  | 0  | 18   | RDR2-sensitive |
| CACGTCACGGTTAGAGCACGGCCC  | 0  | 9    | RDR2-sensitive |
| CACGTCAGAGCTCGGCGCCATAGG  | 0  | 9    | RDR2-sensitive |
| CACGTCAGATACCAGGCATCTCTC  | 0  | 14   | RDR2-sensitive |
| CACGTCAGGAAGCTCGGCGCCACA  | 0  | 10   | RDR2-sensitive |
| CACGTCCCTCAGTAGACAAGGCAT  | 0  | 14   | RDR2-sensitive |
| CACGTCGACTGTTCAAGGGCCGC   | 0  | 18   | RDR2-sensitive |
| CACGTCGTAATCTGCAGTGGGCAC  | 0  | 9    | RDR2-sensitive |
| CACGTCGTGCTTTCGTTGGGTCGT  | 0  | 11   | RDR2-sensitive |
| CACGTCGTGTCTTAGTTGGGTCGT  | 0  | 10   | RDR2-sensitive |
| CACGTCTGTATGCACTCAGGGGCG  | 0  | 25   | RDR2-sensitive |
| CACGTGACATGTAGGGGAAGGCAC  | 0  | 10   | RDR2-sensitive |
| CACGTGGACCAATCAGATCGCGAC  | 0  | 53   | RDR2-sensitive |

|                           |     |     |                |
|---------------------------|-----|-----|----------------|
| CACGTGGACCAATCAGATCGCGCC  | 1   | 33  | RDR2-sensitive |
| CACGTGGACCAGTCAGATCGCGCC  | 1   | 17  | RDR2-sensitive |
| CACGTGGCATGGGAGATCCGCGGC  | 27  | 0   | RDR2-resistant |
| CACGTGGCTGACAAGTAAGAGCGT  | 1   | 12  | RDR2-sensitive |
| CACGTGGGCCTCAGAGCAGGACGA  | 0   | 15  | RDR2-sensitive |
| CACGTGGGCCTCTGAGCTGGACGA  | 3   | 28  | RDR2-sensitive |
| CACGTGGTTTGTGATGGACGTCAA  | 0   | 9   | RDR2-sensitive |
| CACGTGTACAGCAACGACGGACGC  | 0   | 10  | RDR2-sensitive |
| CACGTGTGCTGTAGCCTGAGGCTG  | 0   | 11  | RDR2-sensitive |
| CACGTGTGGACTATGTAGAGGCGT  | 1   | 45  | RDR2-sensitive |
| CACGTTCCGGGCTTTAGAGGGTGT  | 0   | 17  | RDR2-sensitive |
| CACGTTGGCATAGGTAAAGCGCGG  | 0   | 10  | RDR2-sensitive |
| CACGTTGGCATGTACACAGGGCTC  | 0   | 15  | RDR2-sensitive |
| CACGTTGGCATGTACACAGGGCTT  | 1   | 28  | RDR2-sensitive |
| CACGTTGGCTAGAGGGTGGAAGGC  | 3   | 16  | RDR2-sensitive |
| CACGTTGTTGTGGGCCGTGCTCGT  | 0   | 10  | RDR2-sensitive |
| CACGTTTCGACGCTCTGGGTGGCC  | 0   | 11  | RDR2-sensitive |
| CACTAAAAGCACGGCACTGGCAC   | 0   | 12  | RDR2-sensitive |
| CACTACTTCGGCTACTTCGCGGCG  | 106 | 4   | RDR2-resistant |
| CACTAGCTGAAGAAGGACGAGCGG  | 0   | 10  | RDR2-sensitive |
| CACTAGCTGAAGGAGGATGAGCGA  | 0   | 9   | RDR2-sensitive |
| CACTAGCTGAAGTAGGACGAGCGG  | 0   | 11  | RDR2-sensitive |
| CACTAGGGTCGGTTGTGTTATCAT  | 20  | 2   | RDR2-resistant |
| CACTAGGGTTGTACAGTTTGACGG  | 0   | 10  | RDR2-sensitive |
| CACTAGTCGTTAGGATCCTCGGGT  | 0   | 18  | RDR2-sensitive |
| CACTAGTGGACAGCAGCAGACGAC  | 0   | 9   | RDR2-sensitive |
| CACTATATTGGACTGGGCCACGGC  | 0   | 9   | RDR2-sensitive |
| CACTATCGGGCTGATTGGATGGGC  | 1   | 15  | RDR2-sensitive |
| CACTATGGTGGGACTGGGATAGGC  | 0   | 10  | RDR2-sensitive |
| CACTCCTGCAGCGAGGTCGCGGAC  | 0   | 19  | RDR2-sensitive |
| CACTCGACAAAGAGGGCTCGGCAT  | 1   | 37  | RDR2-sensitive |
| CACTCGACAGCTTCGGACGTTTCAT | 0   | 26  | RDR2-sensitive |
| CACTCGACAGCTTCGGGCGTTTCAT | 0   | 14  | RDR2-sensitive |
| CACTCGACAGCTTTGGGCGTTTCAT | 0   | 15  | RDR2-sensitive |
| CACTCGACTGTCCAACCCGGTGGC  | 17  | 75  | RDR2-sensitive |
| CACTCGAGACCAGCACAAAGAGCGC | 1   | 21  | RDR2-sensitive |
| CACTCGAGACCAGCATAGGGACGT  | 0   | 16  | RDR2-sensitive |
| CACTCGAGACTAGCACAGGAGCGC  | 0   | 11  | RDR2-sensitive |
| CACTCGAGACTAGCACAGGGGCGC  | 0   | 17  | RDR2-sensitive |
| CACTCGCTCCGACCAGATGACTGA  | 0   | 9   | RDR2-sensitive |
| CACTCGGCAAAGAACACTCGGCAA  | 21  | 490 | RDR2-sensitive |
| CACTCGGCAAAGAACACTCGGCAC  | 0   | 11  | RDR2-sensitive |
| CACTCGGCAAAGAACGCTCGGCAA  | 1   | 29  | RDR2-sensitive |
| CACTCGGCAAAGAACGCTCGGCGA  | 19  | 295 | RDR2-sensitive |
| CACTCGGCAAAGAACGTTTCGGCGA | 0   | 15  | RDR2-sensitive |
| CACTCGGCAAAGAAGACTCGGCAA  | 7   | 89  | RDR2-sensitive |
| CACTCGGCAAAGAAGACTCGGCAT  | 0   | 13  | RDR2-sensitive |
| CACTCGGCAAAGAAGGCTCGGCAA  | 17  | 283 | RDR2-sensitive |
| CACTCGGCAAAGAAGGCTCGGCAT  | 2   | 16  | RDR2-sensitive |

|                           |     |     |                |
|---------------------------|-----|-----|----------------|
| CACTCGGCAAAGAAGGCTCGGCGA  | 1   | 12  | RDR2-sensitive |
| CACTCGGCAAAGACGGCTCTCGGC  | 1   | 13  | RDR2-sensitive |
| CACTCGGCAAAGACTGACGGTCGT  | 1   | 12  | RDR2-sensitive |
| CACTCGGCAAAGATGGCTCTCGGC  | 0   | 9   | RDR2-sensitive |
| CACTCGGCAAAGGCTATTTTACAC  | 1   | 38  | RDR2-sensitive |
| CACTCGGCACAGCCAAGCACTCGG  | 1   | 23  | RDR2-sensitive |
| CACTCGGCACAGGACGCCTCGGC   | 0   | 18  | RDR2-sensitive |
| CACTCGGCACAGGACGGCACTCAT  | 0   | 12  | RDR2-sensitive |
| CACTCGGCACAGGACGGCACTCGG  | 2   | 42  | RDR2-sensitive |
| CACTCGGCACAGGACGGCGCTCAG  | 1   | 14  | RDR2-sensitive |
| CACTCGGCACAGGGCGGCACTCGG  | 2   | 39  | RDR2-sensitive |
| CACTCGGCAGAGGACAGCACTCGG  | 1   | 39  | RDR2-sensitive |
| CACTCGGCTGGCTGACGAAGAGAC  | 6   | 24  | RDR2-sensitive |
| CACTCGTCACTGTAACCCGATGGT  | 0   | 18  | RDR2-sensitive |
| CACTCGTGACCCGTGGGCCGGCAT  | 0   | 14  | RDR2-sensitive |
| CACTCTATATACGGGGCTGTCTGGT | 0   | 23  | RDR2-sensitive |
| CACTCTCAACTGTAGCGGTGTGGT  | 0   | 13  | RDR2-sensitive |
| CACTCTGAAGGCACATGACGACCT  | 0   | 15  | RDR2-sensitive |
| CACTCTGCAACGACCTAGCCGGAG  | 0   | 12  | RDR2-sensitive |
| CACTCTGGACCATGCCGTGCTGCT  | 0   | 36  | RDR2-sensitive |
| CACTCTGGATGAAGCGAACGGTCT  | 0   | 11  | RDR2-sensitive |
| CACTCTGGGCCAGCGAAACGACTG  | 2   | 14  | RDR2-sensitive |
| CACTCTGTAGCAACGCACAGGCGT  | 0   | 17  | RDR2-sensitive |
| CACTCTTGAACCCCTCGGATGGTT  | 45  | 0   | RDR2-resistant |
| CACTGAACCGGACGTTGGCGCGCC  | 0   | 25  | RDR2-sensitive |
| CACTGAACCGGATTTAGACGACGTA | 1   | 20  | RDR2-sensitive |
| CACTGACAGAATGGATCGACGCAA  | 0   | 11  | RDR2-sensitive |
| CACTGACCAGTGGTACCGGACAAC  | 0   | 9   | RDR2-sensitive |
| CACTGACCGACCTGACAGAAGGAC  | 0   | 11  | RDR2-sensitive |
| CACTGACCGGCCTGACAAGAGGAC  | 0   | 9   | RDR2-sensitive |
| CACTGACCGGCCTGACAGAAAGAC  | 0   | 11  | RDR2-sensitive |
| CACTGACCGGCCTGACAGAAGGAC  | 5   | 19  | RDR2-sensitive |
| CACTGACCGGTCTGACAAGAGGAC  | 0   | 14  | RDR2-sensitive |
| CACTGACCGTCTACAGTAGGGCAT  | 0   | 20  | RDR2-sensitive |
| CACTGACTGGTCTGACAGAAGGAC  | 0   | 9   | RDR2-sensitive |
| CACTGATACGATTGGACACGGCCT  | 0   | 100 | RDR2-sensitive |
| CACTGATCTGACTTAATCCGGCAT  | 116 | 2   | RDR2-resistant |
| CACTGATGTTCTTGATTGGTCTGGT | 26  | 2   | RDR2-resistant |
| CACTGCAAATTAGAGCTCGTCGCC  | 16  | 0   | RDR2-resistant |
| CACTGCAGTCGGAGTGGCGCAGGC  | 11  | 28  | RDR2-sensitive |
| CACTGCGTGAGAACCGAACACGGT  | 0   | 11  | RDR2-sensitive |
| CACTGCGTTGAGAACCTGCGGCGA  | 0   | 37  | RDR2-sensitive |
| CACTGCTGAATTCTATCACGGATG  | 87  | 0   | RDR2-resistant |
| CACTGGACGGACAGCGACGGTCTGG | 0   | 34  | RDR2-sensitive |
| CACTGGACTGTCCGGTGAGCCAAC  | 0   | 17  | RDR2-sensitive |
| CACTGGACTGTCCGGTGCGCCCAT  | 0   | 18  | RDR2-sensitive |
| CACTGGACTGTGCGGTGCGCCCAT  | 0   | 9   | RDR2-sensitive |
| CACTGGATCAAGATCGTACGGCGA  | 0   | 10  | RDR2-sensitive |
| CACTGGGAATGTGGACGTCTACAC  | 0   | 12  | RDR2-sensitive |

|                           |    |    |                |
|---------------------------|----|----|----------------|
| CACTGTAACCTCGAAGCACGTCAT  | 0  | 11 | RDR2-sensitive |
| CACTGTAGACGGTCCGGTGCGGAT  | 0  | 16 | RDR2-sensitive |
| CACTGTAGAGGCATACTGGACCGA  | 0  | 22 | RDR2-sensitive |
| CACTGTAGCAATGGTAGGGGGCAC  | 0  | 15 | RDR2-sensitive |
| CACTGTAGCAGCGATAGGGGGCAC  | 0  | 9  | RDR2-sensitive |
| CACTGTAGCAGCGCTAGGGGGCAA  | 1  | 13 | RDR2-sensitive |
| CACTGTAGCAGCTTTAGCGGTCAC  | 0  | 15 | RDR2-sensitive |
| CACTGTAGCAGTGGTAGGGGGCAC  | 1  | 21 | RDR2-sensitive |
| CACTGTAGCATGTCCGGTGCGGAT  | 1  | 17 | RDR2-sensitive |
| CACTGTAGCGATGTCAGGCGCCGT  | 0  | 10 | RDR2-sensitive |
| CACTGTAGCGGCATGCATCTTCCA  | 0  | 17 | RDR2-sensitive |
| CACTGTAGCTTTAGGGGACCGAAT  | 0  | 22 | RDR2-sensitive |
| CACTGTCACCTCTGCCTCAAGCGG  | 0  | 9  | RDR2-sensitive |
| CACTGTCAGCACTCGGCAAAGATG  | 0  | 21 | RDR2-sensitive |
| CACTGTCGCTTGTACGAGATGGAT  | 0  | 18 | RDR2-sensitive |
| CACTGTGACTCGAGCTGAATACGT  | 0  | 12 | RDR2-sensitive |
| CACTGTGGCTTGGTAAGAACGGAT  | 0  | 15 | RDR2-sensitive |
| CACTGTGTTGAGAACCTGCGACGG  | 0  | 10 | RDR2-sensitive |
| CACTGTTAGTAGCAGCATCGTCGT  | 0  | 24 | RDR2-sensitive |
| CACTGTTACGGCACTTGCTGGCA   | 26 | 2  | RDR2-resistant |
| CACTGTTACGTCGGCACCAAGGCT  | 30 | 3  | RDR2-resistant |
| CACTGTTGACCAGTAGGACCGGAC  | 0  | 15 | RDR2-sensitive |
| CACTGTTGGAGGGAAGGCGAAGAC  | 0  | 9  | RDR2-sensitive |
| CACTGTTGGTACTTCAAGATTGGA  | 0  | 22 | RDR2-sensitive |
| CACTGTTTTGATGTGTTAGGTCGG  | 0  | 13 | RDR2-sensitive |
| CACTGTTTTTACACTTCGGGCTGG  | 0  | 22 | RDR2-sensitive |
| CACTTAGGTCCTCGAACTTGCCAT  | 0  | 10 | RDR2-sensitive |
| CACTTATTCGTGTCGGGCCGGCCC  | 0  | 15 | RDR2-sensitive |
| CACTTCAACCTGGGATCGAGGGCA  | 0  | 9  | RDR2-sensitive |
| CACTTCAACGGATCCACTCGGCAC  | 0  | 21 | RDR2-sensitive |
| CACTTCAACATTGTCGGCACCAAC  | 0  | 13 | RDR2-sensitive |
| CACTTGAACATGGTCGACGGCGAG  | 0  | 22 | RDR2-sensitive |
| CACTTGAACATGGTCGACGGTGAG  | 0  | 9  | RDR2-sensitive |
| CACTTGACAGAGTGAGGCTGACAG  | 0  | 10 | RDR2-sensitive |
| CACTTGGACGAACGACTGGGCGGC  | 0  | 11 | RDR2-sensitive |
| CACTTGTCGTGACTCGGTCATCAT  | 0  | 9  | RDR2-sensitive |
| CACTTTATCTCGGATCGGATACGG  | 0  | 15 | RDR2-sensitive |
| CACTTTCGGCAGGACGATATGCAA  | 0  | 11 | RDR2-sensitive |
| CACTTTGTTAGGCTGTACCGGTGT  | 0  | 10 | RDR2-sensitive |
| CACTTTTGGTGTTC AACACGTCGG | 0  | 10 | RDR2-sensitive |
| CACTTTTTTATTTGGTTTGTGGAA  | 0  | 13 | RDR2-sensitive |
| CAGAAAAGGTGGACTCGGACGATC  | 0  | 12 | RDR2-sensitive |
| CAGAAAGACGGATGGACTACCGC   | 0  | 50 | RDR2-sensitive |
| CAGAACAAACCGAGAGTCGTGAC   | 0  | 14 | RDR2-sensitive |
| CAGAACACGAGTGGGGCAGAACAA  | 0  | 9  | RDR2-sensitive |
| CAGAACAGACAGAGCACACACAG   | 0  | 17 | RDR2-sensitive |
| CAGAACATGCACCACTGTGGACGC  | 0  | 9  | RDR2-sensitive |
| CAGAACCAGAACCAGATCGAGCGC  | 0  | 31 | RDR2-sensitive |
| CAGAACGACAGAACGGCAGAACGC  | 0  | 14 | RDR2-sensitive |

|                           |    |     |                |
|---------------------------|----|-----|----------------|
| CAGAACGGCACTCGGCAAAGACAA  | 3  | 20  | RDR2-sensitive |
| CAGAACGGCAGAACGGCAGAACGC  | 0  | 12  | RDR2-sensitive |
| CAGAACTCACCTCACGGAGGACAT  | 0  | 16  | RDR2-sensitive |
| CAGAACTCCCGCTCAGTAGAGACA  | 52 | 122 | RDR2-sensitive |
| CAGAACTCCTGATCCATAGAGACA  | 64 | 0   | RDR2-resistant |
| CAGAACTCTGCAGGTAGAGCTGTA  | 1  | 39  | RDR2-sensitive |
| CAGAACTCTGCCAGACACGTCAT   | 0  | 22  | RDR2-sensitive |
| CAGAACTGCGTACGCTGCCGTCOA  | 0  | 15  | RDR2-sensitive |
| CAGAAGACGCGCGAGAAGCTGGAC  | 0  | 13  | RDR2-sensitive |
| CAGAAGGAAGGGCACTCAGATCGA  | 0  | 12  | RDR2-sensitive |
| CAGAAGGAAGGGCACTCGGATCGA  | 0  | 11  | RDR2-sensitive |
| CAGAAGTACGTAGTCGCTGTCCGA  | 0  | 9   | RDR2-sensitive |
| CAGAAGTGTGAGGAGGCGTAGGAA  | 27 | 0   | RDR2-resistant |
| CAGAATACTGTCCAAGCTTCGGCA  | 20 | 0   | RDR2-resistant |
| CAGAATCGTGCCGGATCACGGGTC  | 0  | 20  | RDR2-sensitive |
| CAGAATCTGCGCGACGAACCGGCT  | 0  | 9   | RDR2-sensitive |
| CAGACAACGAATTTTCAGAGTGATG | 46 | 1   | RDR2-resistant |
| CAGACATACTGGTAGACGACGCGA  | 0  | 12  | RDR2-sensitive |
| CAGACCACTCTCGGGACTCGACGG  | 0  | 13  | RDR2-sensitive |
| CAGACCAGCGACTGCAGCGAAGGC  | 0  | 25  | RDR2-sensitive |
| CAGACCAGCGGCTGCAGCGAAGAC  | 0  | 9   | RDR2-sensitive |
| CAGACCATCTGGACCTGACCTCGG  | 0  | 16  | RDR2-sensitive |
| CAGACCGAGGCTGTGCGACGCGGA  | 1  | 15  | RDR2-sensitive |
| CAGACCGCGGACCGTTCGGCACCT  | 0  | 17  | RDR2-sensitive |
| CAGACCGGTCAGTGGAGCGGCGAA  | 6  | 39  | RDR2-sensitive |
| CAGACGAACGACGGGGATGACGAC  | 27 | 0   | RDR2-resistant |
| CAGACGAAGGCCTGCGGTGACGTC  | 3  | 20  | RDR2-sensitive |
| CAGACGACTAGCAGAGGTGAGCGT  | 0  | 48  | RDR2-sensitive |
| CAGACGACTCGAACGGCGCCTCGC  | 1  | 29  | RDR2-sensitive |
| CAGACGAGTGGTAGACAGGGATGG  | 0  | 20  | RDR2-sensitive |
| CAGACGGACGCTGGACGCAGGAAG  | 0  | 11  | RDR2-sensitive |
| CAGACGGATGGTAGAAAGGGTTAG  | 0  | 19  | RDR2-sensitive |
| CAGACGGATGGTAGACAAGGTTAG  | 0  | 17  | RDR2-sensitive |
| CAGACGGCATGCAGGACAGACGAC  | 0  | 12  | RDR2-sensitive |
| CAGACGGTGGAGACAGACAGAGGA  | 0  | 11  | RDR2-sensitive |
| CAGACGTGGAATAAGAGCGAGCAA  | 0  | 53  | RDR2-sensitive |
| CAGACGTGGAATAGGAGCGAGCAA  | 1  | 16  | RDR2-sensitive |
| CAGACGTGGAGTAGAAGCGAGCAA  | 0  | 10  | RDR2-sensitive |
| CAGACGTTGAGCTGGACAGGTCGC  | 0  | 11  | RDR2-sensitive |
| CAGACTCCGGACAGTGTGAGCGGT  | 0  | 9   | RDR2-sensitive |
| CAGACTCTCGAGCAAGCCAGACAA  | 0  | 9   | RDR2-sensitive |
| CAGACTCTCGAGCAAGCTAAGCGA  | 0  | 11  | RDR2-sensitive |
| CAGACTGAATCTGATAAGAATGGA  | 0  | 9   | RDR2-sensitive |
| CAGACTGACCCTGACACTACGGCT  | 0  | 17  | RDR2-sensitive |
| CAGACTGACGCGCAGACTGACCGC  | 0  | 13  | RDR2-sensitive |
| CAGACTGAGCTGAACTTCGGCTGC  | 0  | 10  | RDR2-sensitive |
| CAGACTGCTTCTCTCACGGCAA    | 0  | 11  | RDR2-sensitive |
| CAGACTGGACTGGCTGAGTGCATG  | 0  | 24  | RDR2-sensitive |
| CAGACTGGCCGAGCCGATCGACGT  | 2  | 15  | RDR2-sensitive |

|                           |    |    |                |
|---------------------------|----|----|----------------|
| CAGACTGGTAGATGCAAGGACTGG  | 0  | 10 | RDR2-sensitive |
| CAGACTGGTCAGTGGAGCGGTGGA  | 3  | 16 | RDR2-sensitive |
| CAGACTGGTTTAGGTGCTGTCCGGG | 0  | 9  | RDR2-sensitive |
| CAGACTGTGACAGCTGGGTCCCGT  | 0  | 9  | RDR2-sensitive |
| CAGACTGTGTTCAACGGGGGACGC  | 0  | 13 | RDR2-sensitive |
| CAGACTTCAATCGAAGATCGTCGT  | 0  | 9  | RDR2-sensitive |
| CAGACTTCAATCGAAGGTCGTCGT  | 2  | 61 | RDR2-sensitive |
| CAGAGACAAAACAGGCAGGGACAC  | 0  | 12 | RDR2-sensitive |
| CAGAGACAAAACGAGCAGGGACAC  | 0  | 12 | RDR2-sensitive |
| CAGAGACAAAACGGGCAGGGACAC  | 0  | 17 | RDR2-sensitive |
| CAGAGACAAAGCAGGCAGGGACAC  | 1  | 14 | RDR2-sensitive |
| CAGAGACAGAACAGGCAGGGACAC  | 0  | 30 | RDR2-sensitive |
| CAGAGACGTGTAGCAGTCGTGCGC  | 0  | 11 | RDR2-sensitive |
| CAGAGATCGCGACAACCGGAGGTA  | 22 | 0  | RDR2-resistant |
| CAGAGCAGACAAGTCGGACCTCAA  | 0  | 22 | RDR2-sensitive |
| CAGAGCAGAGGCTACGGAACGCGC  | 0  | 14 | RDR2-sensitive |
| CAGAGCCGGACGGCCTGGGGTCAC  | 34 | 0  | RDR2-resistant |
| CAGAGCGGGATTGGTGTAACGAA   | 0  | 12 | RDR2-sensitive |
| CAGAGCGGTAGGGGTGGAGGGCGT  | 16 | 0  | RDR2-resistant |
| CAGAGCGGTGCTGCAGAGCGGTAT  | 0  | 16 | RDR2-sensitive |
| CAGAGGACAATACTGGATAGTCAT  | 0  | 28 | RDR2-sensitive |
| CAGAGGACCTGAGCTGCTCGGCGT  | 0  | 12 | RDR2-sensitive |
| CAGAGGACGCTGCTGAAGAGCATA  | 0  | 10 | RDR2-sensitive |
| CAGAGGAGTGTACCACAGAGGATG  | 20 | 2  | RDR2-resistant |
| CAGAGGCGTAGACAGTGGGTGGTC  | 0  | 9  | RDR2-sensitive |
| CAGAGGCTACGGAACGCGCAGAAA  | 0  | 17 | RDR2-sensitive |
| CAGAGGGTCTGTACGGCGTATCGG  | 1  | 13 | RDR2-sensitive |
| CAGAGGGTGGCATAGAACTGAGCT  | 17 | 87 | RDR2-sensitive |
| CAGAGTCAGCTCGGCTCGGCTCGT  | 0  | 11 | RDR2-sensitive |
| CAGAGTGAACGGAACGGAGCGTGA  | 0  | 16 | RDR2-sensitive |
| CAGAGTGGACAGTTGACGCCGGCC  | 0  | 10 | RDR2-sensitive |
| CAGAGTGGACTGGGCACGCACGGT  | 0  | 13 | RDR2-sensitive |
| CAGAGTGGGCTAACGACGACGGAT  | 70 | 3  | RDR2-resistant |
| CAGAGTTAGACGTGTGGTAGACAT  | 0  | 10 | RDR2-sensitive |
| CAGATAAGTTTAGATCGTGCCGAC  | 50 | 3  | RDR2-resistant |
| CAGATACGGAAGGCGACTCCAAGT  | 20 | 2  | RDR2-resistant |
| CAGATACGGCTGCACGGTACTCCA  | 0  | 81 | RDR2-sensitive |
| CAGATACGGGTAGGATAGGTGATA  | 0  | 12 | RDR2-sensitive |
| CAGATAGATGGGAGGCAGAACGGC  | 0  | 20 | RDR2-sensitive |
| CAGATCACACGTGGGCCTTAGGAC  | 36 | 3  | RDR2-resistant |
| CAGATCAGGCTACGTAGAGGGAGC  | 0  | 9  | RDR2-sensitive |
| CAGATCCAAAGTCGGGCGGGGCAC  | 1  | 35 | RDR2-sensitive |
| CAGATCGACGACCCTGGACGCGGT  | 0  | 16 | RDR2-sensitive |
| CAGATCGATATCAGGACTCGACGG  | 1  | 26 | RDR2-sensitive |
| CAGATCGATATCGGGACTCGACGG  | 1  | 12 | RDR2-sensitive |
| CAGATCGATGGACGGCAGAACGGC  | 0  | 25 | RDR2-sensitive |
| CAGATCGCTGAACGCTGACGGTGA  | 2  | 33 | RDR2-sensitive |
| CAGATCGGGTTGGTCGAGTCGGAT  | 0  | 9  | RDR2-sensitive |
| CAGATCGTAAACCAGGGCAGGCAT  | 0  | 9  | RDR2-sensitive |

|                           |    |    |                |
|---------------------------|----|----|----------------|
| CAGATCTACTGGACGACGAGCGCA  | 0  | 25 | RDR2-sensitive |
| CAGATCTCTGCCGCCAGGACGGCG  | 24 | 0  | RDR2-resistant |
| CAGATGAGGATGTGCCGATTCCGG  | 14 | 0  | RDR2-resistant |
| CAGATGAGTCGGCGCGAGACGGAA  | 0  | 10 | RDR2-sensitive |
| CAGATGATGCGTACTGATTAGACT  | 0  | 13 | RDR2-sensitive |
| CAGATGCACCTCTGCCGGTCGGGAC | 0  | 28 | RDR2-sensitive |
| CAGATGCATGTGGAGACCGGTGAT  | 23 | 0  | RDR2-resistant |
| CAGATGGGTTCGAGCGCGTGGGCGA | 6  | 27 | RDR2-sensitive |
| CAGATGGGTTCGCGCGAGACGGAA  | 3  | 23 | RDR2-sensitive |
| CAGATGGGTTCGCGCGAGACGGAG  | 3  | 57 | RDR2-sensitive |
| CAGATGTCCGGGTGGGTGAGCGGT  | 52 | 0  | RDR2-resistant |
| CAGATTAGTAGGAGCCGCGTTCCC  | 0  | 18 | RDR2-sensitive |
| CAGATTCACCGACGGCAGAACCAA  | 0  | 22 | RDR2-sensitive |
| CAGATTGATGGGCGGTACGGTATG  | 14 | 0  | RDR2-resistant |
| CAGATTGGTAGGAGCTACGTTCCC  | 0  | 14 | RDR2-sensitive |
| CAGATTGTAGATGCATGTCCGACGC | 0  | 13 | RDR2-sensitive |
| CAGATTGTTAGAGACAGACGTTGT  | 0  | 16 | RDR2-sensitive |
| CAGCAACCGCGGCCGCGAACACGG  | 17 | 1  | RDR2-resistant |
| CAGCAACGGACACACCTTCGGCTC  | 2  | 23 | RDR2-sensitive |
| CAGCAACGTTCGAGGTAGAGCGTGC | 10 | 84 | RDR2-sensitive |
| CAGCACAACCTGCAGGTCGGCCGGT | 0  | 11 | RDR2-sensitive |
| CAGCACAGTAGGTATCTCGGCGTT  | 0  | 11 | RDR2-sensitive |
| CAGCACAGTCCAGCTAGACTCGGA  | 0  | 13 | RDR2-sensitive |
| CAGCACCACTGTTGGGCTGCCGGT  | 0  | 12 | RDR2-sensitive |
| CAGCACCGCGCGGACGAGGACGGC  | 0  | 16 | RDR2-sensitive |
| CAGCACGACACGGAACCTGCATCAC | 0  | 14 | RDR2-sensitive |
| CAGCACGACGGAGCCGATGAGCAG  | 1  | 12 | RDR2-sensitive |
| CAGCACGAGACGTAGTGAACCGGA  | 0  | 24 | RDR2-sensitive |
| CAGCACGCGACTGTGGTTGTTGGG  | 0  | 13 | RDR2-sensitive |
| CAGCACGGAAGGGAATAAGACGGG  | 0  | 18 | RDR2-sensitive |
| CAGCACGTGCTAGCGATGGCGGCT  | 33 | 0  | RDR2-resistant |
| CAGCACTACGGGCTGAGGCTACAG  | 0  | 13 | RDR2-sensitive |
| CAGCAGACTACAGCCTCAGACTAT  | 0  | 18 | RDR2-sensitive |
| CAGCAGATCGCGGTTGCAACGCCT  | 0  | 12 | RDR2-sensitive |
| CAGCAGCGGCTCTAGTATCTTCGT  | 0  | 10 | RDR2-sensitive |
| CAGCAGCTTCAAAAACATGGACGC  | 0  | 11 | RDR2-sensitive |
| CAGCAGCTTTTGCAGTCGTCTGGT  | 1  | 16 | RDR2-sensitive |
| CAGCAGGCTCCGCATCCCTCTCCG  | 0  | 12 | RDR2-sensitive |
| CAGCAGGGACGAGAGTGAAGGCGA  | 1  | 17 | RDR2-sensitive |
| CAGCAGGGTCGACGAGGTCAGCAG  | 0  | 9  | RDR2-sensitive |
| CAGCAGGTGATCGGCTGAAGACGC  | 0  | 22 | RDR2-sensitive |
| CAGCAGTAGAGGCGCAAGAAGCTG  | 0  | 9  | RDR2-sensitive |
| CAGCATCTGTGGCGCGACGACGGA  | 0  | 11 | RDR2-sensitive |
| CAGCATGCCGGGCTTGGGCGTCGT  | 0  | 23 | RDR2-sensitive |
| CAGCATGTAGCGAGTGTAGGAGAT  | 19 | 1  | RDR2-resistant |
| CAGCATGTGTTAGGTCGGCGCCAA  | 0  | 11 | RDR2-sensitive |
| CAGCCAATAGTGCAACGGCCGGAC  | 32 | 3  | RDR2-resistant |
| CAGCCACTGTAGACTGTCCGGTGT  | 0  | 11 | RDR2-sensitive |
| CAGCCAGAAGGACGACCGAAGACT  | 0  | 11 | RDR2-sensitive |

|                          |     |     |                |
|--------------------------|-----|-----|----------------|
| CAGCCAGGAGATCGATCGGGTCGC | 0   | 15  | RDR2-sensitive |
| CAGCCATCTGTAGCGTGACGTGTG | 0   | 9   | RDR2-sensitive |
| CAGCCCACGAGTCGGTATGGCACA | 0   | 9   | RDR2-sensitive |
| CAGCCCCGCGTCGCACGGATTCGT | 180 | 11  | RDR2-resistant |
| CAGCCCTGATTGAGAGAACACGGA | 0   | 15  | RDR2-sensitive |
| CAGCCCTGGACGCAGCTAGCCGTT | 0   | 10  | RDR2-sensitive |
| CAGCCGCAGCCGGATTGCAGCCGC | 2   | 16  | RDR2-sensitive |
| CAGCCGGAGGTAGGGTCCAGCCGC | 45  | 4   | RDR2-resistant |
| CAGCCGGCTGTACGTAGACGTCGA | 0   | 10  | RDR2-sensitive |
| CAGCCTAAGCCTGCTACGTACTGT | 0   | 10  | RDR2-sensitive |
| CAGCCTGGACCAGTTGAACGGACC | 0   | 21  | RDR2-sensitive |
| CAGCCTGGACCAGTTGAACGGGCC | 0   | 11  | RDR2-sensitive |
| CAGCCTTAGTCTGTGGAGCGGTAA | 0   | 9   | RDR2-sensitive |
| CAGCGAACTGTACATCGGCAACAG | 1   | 24  | RDR2-sensitive |
| CAGCGAACTGTACATCGGCAACGG | 0   | 19  | RDR2-sensitive |
| CAGCGAACTGTACATCGGCAACTG | 0   | 10  | RDR2-sensitive |
| CAGCGACGACAGCGACTCGGCTAC | 1   | 24  | RDR2-sensitive |
| CAGCGACGGTAGCCTAAGAGGAGA | 0   | 11  | RDR2-sensitive |
| CAGCGACTGCAGCGAAAGGCGACG | 0   | 40  | RDR2-sensitive |
| CAGCGACTGCAGCGAAGACCTCGA | 0   | 25  | RDR2-sensitive |
| CAGCGACTGCAGCGAAGGCCTCGA | 2   | 111 | RDR2-sensitive |
| CAGCGACTGCAGCGAGAGACGACG | 0   | 42  | RDR2-sensitive |
| CAGCGACTGCGACGGCTGCATGCT | 0   | 9   | RDR2-sensitive |
| CAGCGACTGCGGCGAAGACTTCGA | 0   | 32  | RDR2-sensitive |
| CAGCGAGAACGACGACATCGACGT | 0   | 9   | RDR2-sensitive |
| CAGCGAGAGTGCAGACGAGGTGAT | 16  | 0   | RDR2-resistant |
| CAGCGAGCGTTGGGCAGTGATGGA | 0   | 11  | RDR2-sensitive |
| CAGCGAGGTAGGACGGACAACCAA | 0   | 16  | RDR2-sensitive |
| CAGCGCGGGCAATAGCGAGGCGAT | 0   | 9   | RDR2-sensitive |
| CAGCGCGGGCGAGAGCGAGGCGAT | 0   | 10  | RDR2-sensitive |
| CAGCGGACGCTAACTGCGGGCGAC | 0   | 10  | RDR2-sensitive |
| CAGCGGACGGCCACTAGTGGACAG | 0   | 9   | RDR2-sensitive |
| CAGCGGACTTAGCTTGACAGGCAA | 0   | 10  | RDR2-sensitive |
| CAGCGGAGACAAGACAACGGGCAG | 0   | 13  | RDR2-sensitive |
| CAGCGGAGACTGCATGGAGTGCGC | 0   | 19  | RDR2-sensitive |
| CAGCGGAGACTGTATGGAGTGCGC | 0   | 45  | RDR2-sensitive |
| CAGCGGCGATATCCTGGGTGGCAC | 28  | 1   | RDR2-resistant |
| CAGCGGCTGCAGCGAAGACTTCGA | 0   | 21  | RDR2-sensitive |
| CAGCGGCTGCAGCGAAGGCCTCGA | 0   | 20  | RDR2-sensitive |
| CAGCGGCTGCAGCGAAGGCTTCGA | 0   | 9   | RDR2-sensitive |
| CAGCGGCTGGGAGGAGGGCCGAGG | 31  | 1   | RDR2-resistant |
| CAGCGGCTTGACTTGACGGAAC   | 0   | 13  | RDR2-sensitive |
| CAGCGGGAGACTGGCTCTAGTGAT | 0   | 24  | RDR2-sensitive |
| CAGCGGGAGACTGGTGAGCAACGG | 0   | 21  | RDR2-sensitive |
| CAGCGGGGTAGATGCGAGCAGCAC | 0   | 15  | RDR2-sensitive |
| CAGCGGTGTGCTCTGCAACCGGTT | 0   | 10  | RDR2-sensitive |
| CAGCGTAGCATGTATCTCGGCGTC | 0   | 11  | RDR2-sensitive |
| CAGCGTGATAGTGTAGACGTCGG  | 0   | 22  | RDR2-sensitive |
| CAGCGTGCCTGATGCTCGGCCAG  | 0   | 17  | RDR2-sensitive |



|                           |     |     |                |
|---------------------------|-----|-----|----------------|
| CAGCGTGCGTAGGCATACACTCTG  | 0   | 10  | RDR2-sensitive |
| CAGCGTTGGGTTGCGGCGAGCCCC  | 17  | 0   | RDR2-resistant |
| CAGCTAGCCGTTGGACTGATGGCA  | 0   | 12  | RDR2-sensitive |
| CAGCTAGGAGCAGGGGAGAGCGGG  | 156 | 11  | RDR2-resistant |
| CAGCTATTGCACTGCTGGCCGGAC  | 28  | 1   | RDR2-resistant |
| CAGCTATTGTGCGACTGCTGACGGT | 0   | 17  | RDR2-sensitive |
| CAGCTCAGCTCGGCTCGACTCGGC  | 0   | 11  | RDR2-sensitive |
| CAGCTCCAACAGCCAGGACGTCGG  | 0   | 17  | RDR2-sensitive |
| CAGCTCCGCCCTGTTGGTCTCGGC  | 0   | 12  | RDR2-sensitive |
| CAGCTCGAGGTAGACGACGGCCTG  | 3   | 53  | RDR2-sensitive |
| CAGCTCGGCTCGGCTCAGATCGGC  | 0   | 9   | RDR2-sensitive |
| CAGCTCGGCTCGGCTCGACTCGGC  | 2   | 67  | RDR2-sensitive |
| CAGCTCGGCTCGGCTCGGATCGGC  | 0   | 72  | RDR2-sensitive |
| CAGCTCGGCTCGGCTCGTTAAGGT  | 0   | 18  | RDR2-sensitive |
| CAGCTCGGCTCGGCTCGTTTACGA  | 0   | 27  | RDR2-sensitive |
| CAGCTCGGCTCGGCTCGTTTGCGA  | 0   | 9   | RDR2-sensitive |
| CAGCTCGGGCGAGACGGACAGAGC  | 0   | 12  | RDR2-sensitive |
| CAGCTCGGTGGCAAGGTAGAAGGC  | 0   | 33  | RDR2-sensitive |
| CAGCTCGTAGCGACTCGACGGTAC  | 0   | 21  | RDR2-sensitive |
| CAGCTCGTGGACGACAGCGCGGCA  | 0   | 34  | RDR2-sensitive |
| CAGCTCGTTTGAATTTGGGTCTG   | 0   | 30  | RDR2-sensitive |
| CAGCTCTGAGGATGAACGATCCAC  | 0   | 11  | RDR2-sensitive |
| CAGCTCTGGGACGGCCGCTGACGG  | 3   | 30  | RDR2-sensitive |
| CAGCTGAAGACACGCCGAACGCGG  | 0   | 14  | RDR2-sensitive |
| CAGCTGAAGGGTGACGCGTAGGAC  | 0   | 9   | RDR2-sensitive |
| CAGCTGAGAATTAGGCGTCTTGAG  | 1   | 15  | RDR2-sensitive |
| CAGCTGCAGAGCCAAGACGGGACC  | 26  | 2   | RDR2-resistant |
| CAGCTGCAGCAGTCCGAACGGCTT  | 0   | 14  | RDR2-sensitive |
| CAGCTGCTCGGAGGTAGTCGGCGC  | 2   | 14  | RDR2-sensitive |
| CAGCTGCTGTAGATCGGTCGGTGT  | 0   | 16  | RDR2-sensitive |
| CAGCTGGACCGGATACTACGCATA  | 0   | 9   | RDR2-sensitive |
| CAGCTGGCTGGTAGAGAGGACGCA  | 0   | 9   | RDR2-sensitive |
| CAGCTGTAGACGGATGTTGACGGC  | 0   | 10  | RDR2-sensitive |
| CAGCTGTAGACGGCCGCTAACGAC  | 0   | 9   | RDR2-sensitive |
| CAGCTGTAGACGGCCGCTAACGGC  | 1   | 66  | RDR2-sensitive |
| CAGCTGTAGACGGCCGCTAATGGC  | 0   | 10  | RDR2-sensitive |
| CAGCTGTAGACGGCTGCTAACGGC  | 0   | 9   | RDR2-sensitive |
| CAGCTGTAGCAATGGGATGGTTAC  | 0   | 21  | RDR2-sensitive |
| CAGCTGTAGCTAGGATGGCAACAG  | 1   | 23  | RDR2-sensitive |
| CAGCTGTATGACTACAAGATGGTT  | 1   | 21  | RDR2-sensitive |
| CAGCTGTGCAGAAAAGCTGTTCTG  | 1   | 16  | RDR2-sensitive |
| CAGCTGTGGAAACGGTAAGCTCAT  | 0   | 11  | RDR2-sensitive |
| CAGCTGTGGAAACGGTAAGCTGAT  | 7   | 124 | RDR2-sensitive |
| CAGCTGTTGAAACGGTAAGCTGAT  | 0   | 18  | RDR2-sensitive |
| CAGCTGTTGTGCGCTACTGACGGT  | 0   | 16  | RDR2-sensitive |
| CAGCTTCGGGAAACTCCAACGGCT  | 1   | 48  | RDR2-sensitive |
| CAGCTTTAGAACGGCCGCTGACGG  | 0   | 14  | RDR2-sensitive |
| CAGCTTTAGGACGGCCACTGACGG  | 0   | 15  | RDR2-sensitive |
| CAGCTTTAGGACGGCCGCTGACGG  | 1   | 17  | RDR2-sensitive |

|                          |    |     |                |
|--------------------------|----|-----|----------------|
| CAGCTTTGGGACGGCCGCTGACGG | 0  | 19  | RDR2-sensitive |
| CAGCTTTTCTGAGAATCTGGCTGT | 1  | 17  | RDR2-sensitive |
| CAGGAAACGGTACTGTCGCTTGGC | 0  | 13  | RDR2-sensitive |
| CAGGAAACTAGGCACGATGGGCAA | 3  | 62  | RDR2-sensitive |
| CAGGAAACTAGGCACGGTGGACAA | 0  | 12  | RDR2-sensitive |
| CAGGAACAGTAGACCCAGGCGGAT | 0  | 22  | RDR2-sensitive |
| CAGGAACATCTGCTCGATGGACAT | 0  | 9   | RDR2-sensitive |
| CAGGAACATGGCCGCGCGACCCTC | 32 | 4   | RDR2-resistant |
| CAGGAACTCTCTGAGACAGCGGTT | 0  | 9   | RDR2-sensitive |
| CAGGAACTGTAAATTTTTACGGCT | 0  | 34  | RDR2-sensitive |
| CAGGAAGACTGGCAGCGGCACTGA | 0  | 9   | RDR2-sensitive |
| CAGGAAGGAGCAGTCTGCATCTAA | 0  | 9   | RDR2-sensitive |
| CAGGACAAAGGACGAAGGCGTCAG | 0  | 11  | RDR2-sensitive |
| CAGGACAAAGGACGGAGGCGTCAG | 2  | 34  | RDR2-sensitive |
| CAGGACAACACTCGGCAAAGACAT | 0  | 22  | RDR2-sensitive |
| CAGGACAAGTGCTGCGCAGGTCCG | 0  | 24  | RDR2-sensitive |
| CAGGACACCGTCTCTAGCTTGCGG | 0  | 11  | RDR2-sensitive |
| CAGGACAGACGAAGGACAGACGAA | 0  | 9   | RDR2-sensitive |
| CAGGACAGCACTCGGCAAAGACAA | 1  | 14  | RDR2-sensitive |
| CAGGACATCGTAACCCGAGAGCGG | 2  | 34  | RDR2-sensitive |
| CAGGACCACACTCGGCAAAGACAC | 1  | 12  | RDR2-sensitive |
| CAGGACCACACTCGGCAAAGACAT | 1  | 42  | RDR2-sensitive |
| CAGGACCATGTAGGAGGCGCCAAT | 0  | 9   | RDR2-sensitive |
| CAGGACCCCACTCAGCAAAGACAT | 1  | 14  | RDR2-sensitive |
| CAGGACCCCACTCGGCAAAGACAA | 0  | 16  | RDR2-sensitive |
| CAGGACCCCACTCGGCAAAGACAC | 5  | 53  | RDR2-sensitive |
| CAGGACCCTACTCGGCAAAGACAC | 0  | 9   | RDR2-sensitive |
| CAGGACCCTGACGACAAACGGCGT | 0  | 59  | RDR2-sensitive |
| CAGGACCCTGAGCTCGCTGGAGGC | 0  | 17  | RDR2-sensitive |
| CAGGACCGAAGAGCAGGCGAGCAG | 0  | 15  | RDR2-sensitive |
| CAGGACCTAAGGAGTGCTACTCAG | 0  | 10  | RDR2-sensitive |
| CAGGACCTGAGGAGTGCTACTCAA | 0  | 11  | RDR2-sensitive |
| CAGGACCTGCCAAACATCAGTCGC | 2  | 34  | RDR2-sensitive |
| CAGGACCTGCCAAACATCAGTCGT | 0  | 34  | RDR2-sensitive |
| CAGGACCTGCTGCGCAACACGGAT | 0  | 9   | RDR2-sensitive |
| CAGGACGAAGCCTGAACCAGACGA | 3  | 210 | RDR2-sensitive |
| CAGGACGAAGCCTGAACGAGACGA | 0  | 21  | RDR2-sensitive |
| CAGGACGAAGCCTGAGCAAGACGA | 0  | 17  | RDR2-sensitive |
| CAGGACGAAGCCTGAGCGAGACGA | 3  | 27  | RDR2-sensitive |
| CAGGACGAAGGAAGCATAGGGCTT | 0  | 29  | RDR2-sensitive |
| CAGGACGAAGGCTGAGCCAGACGA | 0  | 24  | RDR2-sensitive |
| CAGGACGACACGAGATGAGACGAT | 0  | 9   | RDR2-sensitive |
| CAGGACGACACTCGGCAAAGACAA | 2  | 70  | RDR2-sensitive |
| CAGGACGACACTCGGCAAAGACAG | 0  | 21  | RDR2-sensitive |
| CAGGACGACGACGATGCGGCGCAG | 0  | 25  | RDR2-sensitive |
| CAGGACGAGACGGGATGGAATGAT | 0  | 13  | RDR2-sensitive |
| CAGGACGAGCATGCATGCATTCAT | 1  | 15  | RDR2-sensitive |
| CAGGACGATAAGCGCGTAAGGCAA | 0  | 30  | RDR2-sensitive |
| CAGGACGCCAAACCAGATCGCGGT | 1  | 25  | RDR2-sensitive |

|                           |     |    |                |
|---------------------------|-----|----|----------------|
| CAGGACGCCAACCAGATCGCGGTC  | 2   | 33 | RDR2-sensitive |
| CAGGACGCCAACCAGGTCGCGGTC  | 0   | 17 | RDR2-sensitive |
| CAGGACGCGGAAGAAGGGAAGGAT  | 0   | 11 | RDR2-sensitive |
| CAGGACGGCACTCGGCAAAGACAA  | 3   | 26 | RDR2-sensitive |
| CAGGACGGGACGGGACGAGACGAT  | 0   | 12 | RDR2-sensitive |
| CAGGACGGGATATGATAGGACGAT  | 0   | 17 | RDR2-sensitive |
| CAGGACGGGATGGGATGGGACGAT  | 0   | 62 | RDR2-sensitive |
| CAGGACGGGTTGGGTTGGGACGAT  | 0   | 9  | RDR2-sensitive |
| CAGGACTAACGAAGGCAGAACGGC  | 0   | 10 | RDR2-sensitive |
| CAGGACTAGCGGGGAGGAGCCCAA  | 1   | 13 | RDR2-sensitive |
| CAGGACTATCCTGGCCAAAACCGG  | 29  | 0  | RDR2-resistant |
| CAGGACTCAGGACACACGACGACA  | 0   | 20 | RDR2-sensitive |
| CAGGACTCAGGACACAGGACGACA  | 0   | 14 | RDR2-sensitive |
| CAGGACTCGAACACGGGCTGGTGA  | 0   | 9  | RDR2-sensitive |
| CAGGACTCGACGGCAGCGCAACGC  | 0   | 48 | RDR2-sensitive |
| CAGGACTCTCGGCACAGACTCCAT  | 0   | 23 | RDR2-sensitive |
| CAGGACTGACCGGCTGCATGAGGA  | 125 | 1  | RDR2-resistant |
| CAGGACTGCGAGGAGATGTGTGCGC | 0   | 12 | RDR2-sensitive |
| CAGGACTGGGAACGCGGTGACGG   | 1   | 25 | RDR2-sensitive |
| CAGGACTGGGCCGCGTCAGCCAAC  | 0   | 36 | RDR2-sensitive |
| CAGGACTTCTGGCCAGGAGAACGA  | 0   | 15 | RDR2-sensitive |
| CAGGAGAGGATTTTGGCGATTGAT  | 24  | 0  | RDR2-resistant |
| CAGGAGCGGGCAGGATTCCACGGT  | 0   | 29 | RDR2-sensitive |
| CAGGAGGACAAGCCCATGGACGGT  | 0   | 10 | RDR2-sensitive |
| CAGGAGGAGGATAGGACGGAGGAT  | 129 | 1  | RDR2-resistant |
| CAGGAGGAGGATGGGGCTTTTCGAC | 18  | 1  | RDR2-resistant |
| CAGGAGGCGAGAGCGGGACTGGAG  | 0   | 9  | RDR2-sensitive |
| CAGGAGTCGTCTCAGATTGGGCAC  | 0   | 13 | RDR2-sensitive |
| CAGGAGTTCAGGACTGTAGGGGCA  | 0   | 14 | RDR2-sensitive |
| CAGGATAAGGACAGGAAGGAGCAT  | 0   | 25 | RDR2-sensitive |
| CAGGATACCAAACATGCGGACCTT  | 0   | 10 | RDR2-sensitive |
| CAGGATAGGGCAGCCCCGGACGAG  | 0   | 9  | RDR2-sensitive |
| CAGGATCTAGAAAGTGACGGATTC  | 0   | 12 | RDR2-sensitive |
| CAGGATCTAGAAGACGAAGGGTTC  | 0   | 62 | RDR2-sensitive |
| CAGGATCTAGAAGGCGAAGGGTTC  | 0   | 15 | RDR2-sensitive |
| CAGGATGGCAGAACGGCAGAACGG  | 0   | 10 | RDR2-sensitive |
| CAGGATGTACCAGTTGGACCGGAC  | 0   | 9  | RDR2-sensitive |
| CAGGATGTAGTTTTGCCGGATGAA  | 15  | 0  | RDR2-resistant |
| CAGGATTCTGTAGTGCGTTGGTC   | 0   | 17 | RDR2-sensitive |
| CAGGATTGCAGAGGCGGAATGGAT  | 0   | 10 | RDR2-sensitive |
| CAGGATTGGATTCGAGGGGACGA   | 0   | 10 | RDR2-sensitive |
| CAGGCAACGTAGCATAGCACTCTC  | 0   | 16 | RDR2-sensitive |
| CAGGCAAGGCACAGATACTCTG    | 0   | 10 | RDR2-sensitive |
| CAGGCACGCAGGACTGTGCAGGCC  | 0   | 10 | RDR2-sensitive |
| CAGGCACGGCACGACAGGACACGG  | 0   | 10 | RDR2-sensitive |
| CAGGCACGTAGGACTGTGCAGGCC  | 0   | 47 | RDR2-sensitive |
| CAGGCACGTAGGACTGTGCAGGCT  | 0   | 25 | RDR2-sensitive |
| CAGGCACGTGGGCTCCCTAGGCAC  | 0   | 12 | RDR2-sensitive |
| CAGGCACGTGGGCTCTCCAGGCAC  | 0   | 10 | RDR2-sensitive |

|                           |    |     |                |
|---------------------------|----|-----|----------------|
| CAGGCACGTGGGCTCTCTAGGCAC  | 0  | 16  | RDR2-sensitive |
| CAGGCACGTGGGCTCTCTAGGCAT  | 0  | 86  | RDR2-sensitive |
| CAGGCACGTGGGCTGGCACGGCAC  | 0  | 15  | RDR2-sensitive |
| CAGGCACTGGCACTATACTAACCA  | 0  | 11  | RDR2-sensitive |
| CAGGCACTGGCACTATACTAACCG  | 3  | 131 | RDR2-sensitive |
| CAGGCACTGTAGACTGTCCGGTGC  | 0  | 18  | RDR2-sensitive |
| CAGGCACTGTAGACTGTCCGGTGT  | 0  | 10  | RDR2-sensitive |
| CAGGCACTGTAGGCTGTCCGGTGC  | 0  | 13  | RDR2-sensitive |
| CAGGCAGCACCGGCGTAGAGCACT  | 0  | 9   | RDR2-sensitive |
| CAGGCAGCAGCGGCAATGTAGGCT  | 1  | 12  | RDR2-sensitive |
| CAGGCAGTGACGACGTGGACGCAT  | 2  | 16  | RDR2-sensitive |
| CAGGCAGTTGCTCAGGACCTGGCC  | 0  | 13  | RDR2-sensitive |
| CAGGCATCTTCGGACTCAAGTCGG  | 0  | 26  | RDR2-sensitive |
| CAGGCATGACCCGCTATAGCTCTG  | 0  | 14  | RDR2-sensitive |
| CAGGCATGCTCGGCTACTCCAGTC  | 39 | 1   | RDR2-resistant |
| CAGGCCACGACGGACAGAGATCAG  | 0  | 14  | RDR2-sensitive |
| CAGGCCACGGTGGACAATAATCAG  | 1  | 14  | RDR2-sensitive |
| CAGGCCACTCTCGGGACTCGACGG  | 0  | 9   | RDR2-sensitive |
| CAGGCCAGACAGTGCAATCCGGTC  | 0  | 9   | RDR2-sensitive |
| CAGGCCAGGCCTGATCATGTTGGA  | 0  | 13  | RDR2-sensitive |
| CAGGCCGAGCTAGCACGTGGGCGC  | 1  | 23  | RDR2-sensitive |
| CAGGCCTAGACGACGTAGAGTCAA  | 0  | 9   | RDR2-sensitive |
| CAGGCCTGTGGATTTCGTTGCGGGA | 45 | 13  | RDR2-resistant |
| CAGGCGAAGCTCTCTGAGGACGAC  | 12 | 33  | RDR2-sensitive |
| CAGGCGACGCAAACACAAGAGCTG  | 0  | 10  | RDR2-sensitive |
| CAGGCGACGCTTCTCTCTTGGCAT  | 0  | 9   | RDR2-sensitive |
| CAGGCGAGACGGAACCCGAGGCGA  | 0  | 13  | RDR2-sensitive |
| CAGGCGCCAACGAACTCAGATGGT  | 0  | 14  | RDR2-sensitive |
| CAGGCGCTAACACTCGGCAAACAT  | 2  | 17  | RDR2-sensitive |
| CAGGCGGCATGCAGGACAGACGAC  | 0  | 11  | RDR2-sensitive |
| CAGGCGGGTTGGGCATTGACTGCA  | 0  | 13  | RDR2-sensitive |
| CAGGCGTCAGAACTGTGAAGGCTA  | 0  | 10  | RDR2-sensitive |
| CAGGCGTGAGTCTCTTCTCCTCGG  | 0  | 12  | RDR2-sensitive |
| CAGGCTACAGCACACGTGGACCAA  | 0  | 19  | RDR2-sensitive |
| CAGGCTACAGGGAACAAGACCGGC  | 4  | 18  | RDR2-sensitive |
| CAGGCTACGAAGGAACAAGACCGG  | 1  | 14  | RDR2-sensitive |
| CAGGCTACTCTGGGAAGACAACCA  | 0  | 9   | RDR2-sensitive |
| CAGGCTAGCTGAACTGCAGAGGCA  | 0  | 14  | RDR2-sensitive |
| CAGGCTATAGCACACGTGGACCAA  | 0  | 9   | RDR2-sensitive |
| CAGGCTCCAGCACTCCTCCGACGG  | 0  | 13  | RDR2-sensitive |
| CAGGCTCCAGCGCTCCTCCGACGG  | 1  | 16  | RDR2-sensitive |
| CAGGCTCCCGGACTGGACCAGGCA  | 1  | 46  | RDR2-sensitive |
| CAGGCTCCGGTAGGACGTGCATC   | 0  | 11  | RDR2-sensitive |
| CAGGCTCCGGTAGGACGTGCGGTC  | 10 | 28  | RDR2-sensitive |
| CAGGCTCTAGTAGGACGTGGCGA   | 0  | 10  | RDR2-sensitive |
| CAGGCTCTGCAGACGATACCCATC  | 6  | 24  | RDR2-sensitive |
| CAGGCTCTGGAGATGCGACCAAAA  | 0  | 15  | RDR2-sensitive |
| CAGGCTGAACTCCGGTGAACAGGC  | 0  | 20  | RDR2-sensitive |
| CAGGCTGACCGGCGACAAACTCGT  | 0  | 19  | RDR2-sensitive |

|                           |    |    |                |
|---------------------------|----|----|----------------|
| CAGGCTGAGACCGGTGATTTGCAT  | 0  | 27 | RDR2-sensitive |
| CAGGCTGAGGACTGTGCGGACGGT  | 0  | 54 | RDR2-sensitive |
| CAGGCTGATGAGAGGAGGGGGACT  | 0  | 9  | RDR2-sensitive |
| CAGGCTGATGCACGGGACTATCAA  | 0  | 12 | RDR2-sensitive |
| CAGGCTGATGGGAGGAGGGGGACT  | 0  | 10 | RDR2-sensitive |
| CAGGCTGCCGCGGACCTGGCTCGC  | 0  | 11 | RDR2-sensitive |
| CAGGCTGCCTCGACCTGAAGACGC  | 6  | 59 | RDR2-sensitive |
| CAGGCTGCTCGACGGTGAAGTGGC  | 0  | 15 | RDR2-sensitive |
| CAGGCTGCTGGGCCATGACGGCAA  | 0  | 10 | RDR2-sensitive |
| CAGGCTGGCCGACGGTGAACCGAC  | 1  | 17 | RDR2-sensitive |
| CAGGCTGGCTCTGGCGAACTGGCT  | 2  | 22 | RDR2-sensitive |
| CAGGCTGGTCGACGGTGAAGTGAC  | 0  | 9  | RDR2-sensitive |
| CAGGCTGTACAGGAACTACGCAT   | 0  | 19 | RDR2-sensitive |
| CAGGCTGTACGCGTGCAAATTGAG  | 0  | 15 | RDR2-sensitive |
| CAGGCTGTAGCAGGCTATAGTCTC  | 0  | 15 | RDR2-sensitive |
| CAGGCTGTATGAGCGGATACTCGT  | 0  | 67 | RDR2-sensitive |
| CAGGCTGTGCGCGTGCAAATTGAG  | 0  | 9  | RDR2-sensitive |
| CAGGCTGTGGGCGTGCAAATCTAG  | 0  | 15 | RDR2-sensitive |
| CAGGCTTGGACCGGTTCTTTCGT   | 0  | 9  | RDR2-sensitive |
| CAGGGAAGATCTGTGGGGGCTGT   | 17 | 1  | RDR2-resistant |
| CAGGGAACATGGAAGTGGCGTCGC  | 0  | 13 | RDR2-sensitive |
| CAGGGAACTCCAAGCTGAACATCAT | 0  | 15 | RDR2-sensitive |
| CAGGGACAAGAACGGGAAAGGCAG  | 0  | 10 | RDR2-sensitive |
| CAGGGACACACAGCAGAACAACAT  | 0  | 32 | RDR2-sensitive |
| CAGGGACAGTAGGAGGGCCGAGGA  | 4  | 18 | RDR2-sensitive |
| CAGGGACGGACGATATCTTAGCGA  | 0  | 13 | RDR2-sensitive |
| CAGGGAGCTTCGGCATGATGACAC  | 0  | 12 | RDR2-sensitive |
| CAGGGAGGCTGAAGGCAGACTGGC  | 0  | 12 | RDR2-sensitive |
| CAGGGCAATACGGCTGGAGCCACA  | 17 | 0  | RDR2-resistant |
| CAGGGCACGGCACGGTAGAAGATC  | 0  | 11 | RDR2-sensitive |
| CAGGGCAGCCTGTAGCTACGGACA  | 1  | 14 | RDR2-sensitive |
| CAGGGCAGTATACGGATGAAGCAA  | 0  | 9  | RDR2-sensitive |
| CAGGGCATGGCACTACATACACAT  | 0  | 39 | RDR2-sensitive |
| CAGGGCTGACCTGGCGCTGACGTG  | 0  | 19 | RDR2-sensitive |
| CAGGGCTGAGCAGACGGATAGCGC  | 0  | 67 | RDR2-sensitive |
| CAGGGCTGAGCAGACGGATAGCGT  | 0  | 16 | RDR2-sensitive |
| CAGGGCTGCTGTGAAGACGATCCT  | 0  | 14 | RDR2-sensitive |
| CAGGGCTTGTTCGGTTATTCCCAA  | 0  | 12 | RDR2-sensitive |
| CAGGGCTTTTCGGGCTGACCCGGC  | 1  | 18 | RDR2-sensitive |
| CAGGGGACAACACTGGATAGTCTT  | 0  | 41 | RDR2-sensitive |
| CAGGGGACGAGATCTAGATTCCAG  | 0  | 9  | RDR2-sensitive |
| CAGGGGCGACGACAAGAAGGGAAG  | 19 | 0  | RDR2-resistant |
| CAGGGGCGAGAGTGGAGGCGAGAG  | 2  | 27 | RDR2-sensitive |
| CAGGGGCTCTCGGAAATAAGACGT  | 0  | 16 | RDR2-sensitive |
| CAGGGGTTGTAGAACGACGGCCAC  | 0  | 26 | RDR2-sensitive |
| CAGGGTATGGATAGACGACGACGG  | 0  | 9  | RDR2-sensitive |
| CAGGGTTCGTACCCTGTTGACTCGG | 0  | 16 | RDR2-sensitive |
| CAGGGTGCTTTAAGGATCGTGCGA  | 0  | 11 | RDR2-sensitive |
| CAGGGTTACGTGCACGGGGGCAAT  | 0  | 9  | RDR2-sensitive |

|                           |    |     |                |
|---------------------------|----|-----|----------------|
| CAGGGTTTCCTGACTGCTGGACGG  | 0  | 10  | RDR2-sensitive |
| CAGGGTTTGGGGACGCGCGGTGAT  | 57 | 0   | RDR2-resistant |
| CAGGTACCACAGGATGAGGCGCAT  | 2  | 22  | RDR2-sensitive |
| CAGGTACCCTCGGACTAAAGTCGG  | 1  | 59  | RDR2-sensitive |
| CAGGTACCGCAGGATGAGGCGCAT  | 2  | 21  | RDR2-sensitive |
| CAGGTACGGTTCACTGTTCCGGTGT | 0  | 10  | RDR2-sensitive |
| CAGGTACTCTCGGACTAAAGTCGG  | 1  | 19  | RDR2-sensitive |
| CAGGTACTGTTTGCTGTCCGGTGT  | 0  | 26  | RDR2-sensitive |
| CAGGTAGACACTCGGCAAAGACAA  | 0  | 23  | RDR2-sensitive |
| CAGGTAGGCACTCGGCAAAGACAA  | 7  | 100 | RDR2-sensitive |
| CAGGTAGGCACTCGGCAAAGACAT  | 0  | 10  | RDR2-sensitive |
| CAGGTAGTAGGCTGAACTGGGCGT  | 0  | 29  | RDR2-sensitive |
| CAGGTATAGTAGGGGGTAGGGAAC  | 0  | 13  | RDR2-sensitive |
| CAGGTATCTTCGGACTCAAGTCGG  | 1  | 25  | RDR2-sensitive |
| CAGGTATCTTCGGACTCAGGTCGG  | 0  | 11  | RDR2-sensitive |
| CAGGTATCTTCGGACTCGAGTCGG  | 0  | 9   | RDR2-sensitive |
| CAGGTATCTTCGGGCTCGAGTCGG  | 0  | 11  | RDR2-sensitive |
| CAGGTCACGGACCGTCATCGGCTC  | 0  | 13  | RDR2-sensitive |
| CAGGTCACGGACTGTCCGGCCCTC  | 0  | 21  | RDR2-sensitive |
| CAGGTCCTGTAGACTGTCCGGTGC  | 1  | 66  | RDR2-sensitive |
| CAGGTCCTGTAGACTGTCCGGTGT  | 0  | 11  | RDR2-sensitive |
| CAGGTCCTGTAGCTTGTCCGGTGC  | 0  | 12  | RDR2-sensitive |
| CAGGTCGCGGACTGTCCGGCCAG   | 1  | 15  | RDR2-sensitive |
| CAGGTCGCGGACTGTCCGGCCCT   | 0  | 24  | RDR2-sensitive |
| CAGGTCGGACCCGTGTTGAGTGGC  | 0  | 9   | RDR2-sensitive |
| CAGGTCGGGTGCGCTTGCAGTAGG  | 6  | 67  | RDR2-sensitive |
| CAGGTCGGTCAGTGGAGCGGCGAA  | 5  | 43  | RDR2-sensitive |
| CAGGTCGTGACTGAGCTGCCGGTA  | 0  | 9   | RDR2-sensitive |
| CAGGTCGTGGACTCTTCGGTACTG  | 0  | 22  | RDR2-sensitive |
| CAGGTCTCCGGAACCCTTCGTCTT  | 3  | 17  | RDR2-sensitive |
| CAGGTCTGCACTCGGCAAAGACAT  | 0  | 11  | RDR2-sensitive |
| CAGGTGAACGGACGGACGAACGGT  | 0  | 20  | RDR2-sensitive |
| CAGGTGCTCTGAGTAAGCTGGACA  | 16 | 0   | RDR2-resistant |
| CAGGTGGACGATGAGCTGGACGGC  | 0  | 10  | RDR2-sensitive |
| CAGGTGGATGATGAGCTAGACGGC  | 0  | 16  | RDR2-sensitive |
| CAGGTGGCACTGTGGAGAGAAGAC  | 0  | 10  | RDR2-sensitive |
| CAGGTGTTAGCGACTCGGTGGAAG  | 0  | 14  | RDR2-sensitive |
| CAGGTTGAAGAGGCTGATCAGGCA  | 0  | 10  | RDR2-sensitive |
| CAGGTTGGACTGGCCCACGTGCCT  | 0  | 9   | RDR2-sensitive |
| CAGGTTGTAGAGGTAATCGGCCTA  | 0  | 43  | RDR2-sensitive |
| CAGGTTGTGGACTGTCCGGCCCTT  | 0  | 22  | RDR2-sensitive |
| CAGTACAGTGGACACTCGGCACAG  | 0  | 9   | RDR2-sensitive |
| CAGTACTGTAAGTGGTGGTGGT    | 0  | 41  | RDR2-sensitive |
| CAGTAGCGGCGTGGATGAAGGGGC  | 15 | 0   | RDR2-resistant |
| CAGTAGTGTAGACGTACACCCAT   | 0  | 12  | RDR2-sensitive |
| CAGTATCGTAGACTCAGCGGCCAG  | 0  | 9   | RDR2-sensitive |
| CAGTATGCCATCGGACCCACAAAT  | 0  | 10  | RDR2-sensitive |
| CAGTCACTGTAGACGGTCCGGTGC  | 0  | 27  | RDR2-sensitive |
| CAGTCAGGCACTGAGGCACGGCGC  | 0  | 10  | RDR2-sensitive |

|                           |    |    |                |
|---------------------------|----|----|----------------|
| CAGTCCAGATACGAACGTTGGACA  | 29 | 0  | RDR2-resistant |
| CAGTCCGTGTGTAGATCAGGTCAG  | 0  | 9  | RDR2-sensitive |
| CAGTCTGCTGTAGATGGTCCAAC   | 0  | 17 | RDR2-sensitive |
| CAGTCGATGCAGGCAGATGTACGC  | 1  | 12 | RDR2-sensitive |
| CAGTCGATGCGGAATAGGAGGCAA  | 1  | 13 | RDR2-sensitive |
| CAGTCGATGTGGAATAGGAGGCAA  | 1  | 20 | RDR2-sensitive |
| CAGTCGCACGGTCTGTTGTTGGCT  | 0  | 9  | RDR2-sensitive |
| CAGTCGCTGGTCTGACAGAGACAA  | 3  | 69 | RDR2-sensitive |
| CAGTCGAAAGGCAGTAGTCGCAT   | 1  | 15 | RDR2-sensitive |
| CAGTCGGAGTGGCGCAGGCCGGCGC | 11 | 51 | RDR2-sensitive |
| CAGTCGGCTGAGAATGCACGTGCG  | 0  | 42 | RDR2-sensitive |
| CAGTCGGCTGTGAAATGCAGGTGC  | 0  | 11 | RDR2-sensitive |
| CAGTCGGCTGTGAATGCACGTGCG  | 0  | 17 | RDR2-sensitive |
| CAGTCGTGCCGAACCAGCAAGCGG  | 0  | 10 | RDR2-sensitive |
| CAGTCTCAACATCTGTAGTGGCGT  | 0  | 9  | RDR2-sensitive |
| CAGTCTCGCATAGAACCGGATCGT  | 0  | 73 | RDR2-sensitive |
| CAGTCTCGTCCTCACTGTCGTCGC  | 0  | 11 | RDR2-sensitive |
| CAGTCTCGTTCTCACTGTCGGCGC  | 0  | 11 | RDR2-sensitive |
| CAGTCTGCCTCGACCTGAAGACGC  | 2  | 34 | RDR2-sensitive |
| CAGTGAACAGTGAAGTGTCCGGTGC | 0  | 12 | RDR2-sensitive |
| CAGTGAAGTGTATATCGGCAACAA  | 0  | 9  | RDR2-sensitive |
| CAGTGACGTGGACACGGTTAGCCC  | 43 | 0  | RDR2-resistant |
| CAGTGAAGTGTATATCGGCAACAA  | 0  | 9  | RDR2-sensitive |
| CAGTGACTATGGGCCGGACGGTTC  | 1  | 28 | RDR2-sensitive |
| CAGTGACTGTACAACGCTAGGCAT  | 0  | 30 | RDR2-sensitive |
| CAGTGACTGTTCACTGTCCGGTGT  | 0  | 13 | RDR2-sensitive |
| CAGTGAGCAGTAGATCCAGAGCAT  | 0  | 9  | RDR2-sensitive |
| CAGTGAGCGTAGGCATGCAACGGC  | 0  | 9  | RDR2-sensitive |
| CAGTGAGGACGGAATGGGAATGAC  | 0  | 15 | RDR2-sensitive |
| CAGTGATGGGACCAGTGGAAGCGG  | 14 | 0  | RDR2-resistant |
| CAGTGCACAGGCTGCAGCAGGCTA  | 0  | 13 | RDR2-sensitive |
| CAGTGCACAGGCTGTAGCAGGCTA  | 0  | 21 | RDR2-sensitive |
| CAGTGCAGGCGAGAGCGAGGCGAC  | 0  | 9  | RDR2-sensitive |
| CAGTGCCGTGCAGTCGTCGGCGTC  | 47 | 5  | RDR2-resistant |
| CAGTGCCGGGCTGCCCATTTGGCAC | 0  | 18 | RDR2-sensitive |
| CAGTGCTATAGAACAGAAGGGCAA  | 0  | 17 | RDR2-sensitive |
| CAGTGCTATAGAACAGAAGGGCAC  | 0  | 11 | RDR2-sensitive |
| CAGTGCTATAGAACAGAGGGTCAT  | 0  | 15 | RDR2-sensitive |
| CAGTGCTATAGAACAGGAGGGCAT  | 1  | 95 | RDR2-sensitive |
| CAGTGCTATAGAATAGAAGGGCAT  | 0  | 10 | RDR2-sensitive |
| CAGTGGGCCGAACGGAACGCGCAT  | 0  | 11 | RDR2-sensitive |
| CAGTGGTAGCGACCCTGGACTCGG  | 0  | 9  | RDR2-sensitive |
| CAGTTAAAAAGCTCGTAGTTGGAC  | 48 | 0  | RDR2-resistant |
| CAGTTCGACTGCTCGGTTGTCACC  | 0  | 10 | RDR2-sensitive |
| CAGTTCGGTACGGCGACGTCGACT  | 29 | 1  | RDR2-resistant |
| CAGTTCGTGTGGCTGGGACAGCAA  | 0  | 19 | RDR2-sensitive |
| CAGTTCTACGTAGGCTTGGGTCGA  | 0  | 20 | RDR2-sensitive |
| CAGTTGAAGATGAGGTAGGCTATA  | 20 | 0  | RDR2-resistant |
| CAGTTGAGAGTAGTGAAGGCGGG   | 22 | 0  | RDR2-resistant |
| CAGTTGATATCGGCAACTCGGCAT  | 0  | 36 | RDR2-sensitive |

|                          |     |    |                |
|--------------------------|-----|----|----------------|
| CAGTTGCACGTGGAACAGAGACGC | 0   | 37 | RDR2-sensitive |
| CAGTTGGACGTCCAGTTTGGGTAT | 0   | 12 | RDR2-sensitive |
| CAGTTGGGACACTCGGCAAAGAGC | 4   | 34 | RDR2-sensitive |
| CAGTTGGGTGCCTAGAGTTGCATA | 22  | 1  | RDR2-resistant |
| CAGTTGTTTCCTGTTGGCATTCT  | 68  | 0  | RDR2-resistant |
| CAGTTTACTGTAGTGGAGAGTGGT | 0   | 15 | RDR2-sensitive |
| CAGTTTAGGAGGGAGCTCGGCGGC | 0   | 61 | RDR2-sensitive |
| CAGTTTATTATTTGGTAGTCTGAA | 0   | 9  | RDR2-sensitive |
| CAGTTTCAACGATCGTCCCGGTC  | 0   | 10 | RDR2-sensitive |
| CAGTTTCAACGGTCGTCATGCGTC | 0   | 12 | RDR2-sensitive |
| CAGTTTCTGGCTGGCTGTAACGGT | 2   | 74 | RDR2-sensitive |
| CAGTTTGAAGCGGATCCAGACCTC | 0   | 15 | RDR2-sensitive |
| CAGTTTGTAGGACAGCATATTCGC | 0   | 9  | RDR2-sensitive |
| CAGTTTTAATGTAGAATCAGGAC  | 31  | 2  | RDR2-resistant |
| CATAAAGCTGACTGGGAGACGCCA | 0   | 19 | RDR2-sensitive |
| CATAAAGGCACTAGGGCTGGGCAA | 0   | 13 | RDR2-sensitive |
| CATAAAGTTTGTAGCACGGGTGAC | 89  | 1  | RDR2-resistant |
| CATAAGATCCTACGTCTGACGGTT | 0   | 11 | RDR2-sensitive |
| CATAAGTGCCTGTAGATAGGGTGT | 0   | 12 | RDR2-sensitive |
| CATAAATCTGTGATTGGTCGCCGG | 0   | 9  | RDR2-sensitive |
| CATAATATCGGACCTAGATGCGGT | 22  | 0  | RDR2-resistant |
| CATACAACGACGGACGGTCCGCAT | 0   | 18 | RDR2-sensitive |
| CATACGATGGGACGCATGATTCTT | 0   | 11 | RDR2-sensitive |
| CATACGGTGCTGTCAGCGACCGA  | 172 | 7  | RDR2-resistant |
| CATACGTCCGACGGCTATTGGAAC | 0   | 11 | RDR2-sensitive |
| CATACTGTAGAAGAGGGTACCCCT | 1   | 65 | RDR2-sensitive |
| CATACTGTAGTAACGGGTACCCAT | 1   | 13 | RDR2-sensitive |
| CATACTGTAGTAACGGGTACCCCT | 0   | 10 | RDR2-sensitive |
| CATACTGTAGTAAGGGGTACCCAT | 0   | 31 | RDR2-sensitive |
| CATACTGTGGAAGAGGGTACCCCT | 0   | 38 | RDR2-sensitive |
| CATAGAATTCGGCCCCTCAGGTAT | 0   | 14 | RDR2-sensitive |
| CATAGACACAGACGGTCCCACCAG | 0   | 14 | RDR2-sensitive |
| CATAGACCAGAGGACAGACCGGCA | 0   | 9  | RDR2-sensitive |
| CATAGACCATACGATCAGCGGGCG | 0   | 14 | RDR2-sensitive |
| CATAGACTGCATGCGGAGTGGGAT | 0   | 19 | RDR2-sensitive |
| CATAGACTGTAACGGCGAGCGGTA | 0   | 10 | RDR2-sensitive |
| CATAGATGTGGCCTGACGACGGAG | 31  | 1  | RDR2-resistant |
| CATAGCACTCGGCAAAGAAGGCAC | 0   | 9  | RDR2-sensitive |
| CATAGCAGGACGTGCACAGGACTC | 0   | 9  | RDR2-sensitive |
| CATAGGACCAACGACTGCCAACGG | 0   | 10 | RDR2-sensitive |
| CATAGGCTATGGCGCCGAGGTCGT | 1   | 14 | RDR2-sensitive |
| CATAGGTACTGTGGATCGGCCTAG | 0   | 10 | RDR2-sensitive |
| CATAGTGACGTGGACTGTCCGCAC | 0   | 9  | RDR2-sensitive |
| CATAGTGGACGCGTAGAACGGCGT | 2   | 98 | RDR2-sensitive |
| CATAGTTGACTGGGAGACGACGGC | 0   | 13 | RDR2-sensitive |
| CATAGTTGACTGGGAGACGACGGT | 0   | 12 | RDR2-sensitive |
| CATATATGTCCTCTTAGCTTTGGC | 14  | 0  | RDR2-resistant |
| CATATCGGGTAAAACTCGTCGGGT | 0   | 13 | RDR2-sensitive |
| CATATCTAATTATGGGTCGTGCTT | 33  | 0  | RDR2-resistant |



|                           |     |    |                |
|---------------------------|-----|----|----------------|
| CATATCTGGCTGGCTAGGGTGGCG  | 0   | 9  | RDR2-sensitive |
| CATATGGACGGTGGTTCGATGGCGA | 0   | 10 | RDR2-sensitive |
| CATATGGATGCTGTAAGATGACAT  | 0   | 12 | RDR2-sensitive |
| CATATGGCGGGACTGGGCGTGCAT  | 0   | 10 | RDR2-sensitive |
| CATATGTATTGTGGACGTCTACAC  | 0   | 54 | RDR2-sensitive |
| CATATGTGTGAGACTTGGTCCCAG  | 0   | 17 | RDR2-sensitive |
| CATATTCACTGTAGCGGCATGCAT  | 1   | 12 | RDR2-sensitive |
| CATCAACATCGGATGGATCTGACA  | 19  | 0  | RDR2-resistant |
| CATCAAGCTGACTGGGAGACGCCA  | 1   | 17 | RDR2-sensitive |
| CATCAAGTACGGGTTCGGGCACAA  | 0   | 9  | RDR2-sensitive |
| CATCACCCACTTCGTCGGATGCAA  | 1   | 26 | RDR2-sensitive |
| CATCAGATCGAGATCGGGCGGCAT  | 0   | 19 | RDR2-sensitive |
| CATCAGCTAGAGCGTCCGGCGCGT  | 0   | 11 | RDR2-sensitive |
| CATCAGTCGCATGCACTCTCGGAT  | 40  | 4  | RDR2-resistant |
| CATCAGTTATCTTGTCGGATGTTT  | 17  | 0  | RDR2-resistant |
| CATCAGTTTTAGGACGGCCGCTGA  | 0   | 10 | RDR2-sensitive |
| CATCATTTCTATCCTTCGTCGGCC  | 0   | 11 | RDR2-sensitive |
| CATCCAGGCGGGCCCCAGAAGACAG | 0   | 13 | RDR2-sensitive |
| CATCCCTCTGAATCGGACGGACAA  | 0   | 17 | RDR2-sensitive |
| CATCCGACCGTCCGAAGAGGCTAA  | 0   | 9  | RDR2-sensitive |
| CATCCGCAGCGGGGCACTGCACAC  | 0   | 11 | RDR2-sensitive |
| CATCCGGACAAACGCAGAGAAGGA  | 0   | 10 | RDR2-sensitive |
| CATCCGGACATACGCAGAGGAGAC  | 0   | 21 | RDR2-sensitive |
| CATCCGGACGTATGCAGAGGAGGA  | 0   | 21 | RDR2-sensitive |
| CATCCGGGACGTGGACGGCTACAA  | 0   | 16 | RDR2-sensitive |
| CATCCGGGTTGTAGGTGACGTCGG  | 0   | 53 | RDR2-sensitive |
| CATCCGGTCTGTGGATAGAGGAGA  | 0   | 9  | RDR2-sensitive |
| CATCCGTAGTGTCATCGTCGGGAT  | 0   | 14 | RDR2-sensitive |
| CATCCGTGTGGACTGGGCCCGCGT  | 0   | 10 | RDR2-sensitive |
| CATCCTCGGGCGGGAGACGCGGTC  | 0   | 14 | RDR2-sensitive |
| CATCCTGGTTGCAGTCGGGCTGT   | 0   | 10 | RDR2-sensitive |
| CATCCTGTACGACGGCTGTCTCAG  | 0   | 9  | RDR2-sensitive |
| CATCCTTACAGTGAGGTTGTCGGT  | 0   | 12 | RDR2-sensitive |
| CATCCTTCTAGTGGACCCGGGGAT  | 0   | 13 | RDR2-sensitive |
| CATCCTTGCCTTCTGTCTCGGGC   | 4   | 20 | RDR2-sensitive |
| CATCGAAGGCAGAACCAGGGAGGC  | 0   | 11 | RDR2-sensitive |
| CATCGACCTGGAGGAATGACGCGA  | 0   | 14 | RDR2-sensitive |
| CATCGACGGAGAGCAGATGGGGCG  | 29  | 2  | RDR2-resistant |
| CATCGAGCTGGTGGATCAGGCCAT  | 157 | 1  | RDR2-resistant |
| CATCGAGTTCTGTATTAAGCGTA   | 63  | 6  | RDR2-resistant |
| CATCGAGTTGCGATTGTCCGGCGCC | 0   | 9  | RDR2-sensitive |
| CATCGATCCAGGATTCAGGTGCAC  | 0   | 10 | RDR2-sensitive |
| CATCGATCTGGACGGTCCGCGCAT  | 0   | 35 | RDR2-sensitive |
| CATCGATCTGTCATCGGACGACGC  | 0   | 28 | RDR2-sensitive |
| CATCGCAGAGACGGACGGGACAAC  | 0   | 23 | RDR2-sensitive |
| CATCGCAGGACTGACCGGCTGCAT  | 72  | 0  | RDR2-resistant |
| CATCGCCATCGTAGATCGTCCGGA  | 0   | 12 | RDR2-sensitive |
| CATCGCCCTGCTGTGCTTCGTCGG  | 0   | 11 | RDR2-sensitive |
| CATCGCGCGGAAGGCCAGGTAGAG  | 1   | 14 | RDR2-sensitive |

|                          |    |     |                |
|--------------------------|----|-----|----------------|
| CATCGCTGGCTGAGAGATAGGGCC | 0  | 9   | RDR2-sensitive |
| CATCGGAAATGGGAGCGGGAGCGA | 0  | 11  | RDR2-sensitive |
| CATCGGACGGTCCGCAGTAGAGAC | 0  | 9   | RDR2-sensitive |
| CATCGGATCAGCATCGGAGGGCGA | 0  | 9   | RDR2-sensitive |
| CATCGGATTTCCGACGGGTTTCGG | 0  | 9   | RDR2-sensitive |
| CATCGGGTAGCGGGTATGGGGCAA | 2  | 54  | RDR2-sensitive |
| CATCGGGTGACGGATATGGATAGC | 0  | 19  | RDR2-sensitive |
| CATCGGTTGTCCATGGATCTGCGC | 0  | 21  | RDR2-sensitive |
| CATCGTACTGAGCGAAGTTGGCAG | 0  | 15  | RDR2-sensitive |
| CATCGTCAAGCAGGGGAACCTCAT | 0  | 14  | RDR2-sensitive |
| CATCGTCAAGCAGGGGGACCTCAT | 2  | 97  | RDR2-sensitive |
| CATCGTCGACCCTGCTGATTCCGG | 0  | 10  | RDR2-sensitive |
| CATCGTGCGTGATGGTGACCTCGA | 20 | 2   | RDR2-resistant |
| CATCGTGTGCGGATGACGGTCCAA | 0  | 9   | RDR2-sensitive |
| CATCGTTATATTTGTAGAGTGGCC | 0  | 10  | RDR2-sensitive |
| CATCGTTGGGCCGCATACACCGCT | 0  | 12  | RDR2-sensitive |
| CATCTAGACTGGGGCACGCGGCGA | 0  | 13  | RDR2-sensitive |
| CATCTAGCGGGTGAATGATGCATT | 29 | 3   | RDR2-resistant |
| CATCTAGGCTGGGGCACGCGGCGA | 0  | 12  | RDR2-sensitive |
| CATCTATTTATAGGCACAGGACGC | 1  | 13  | RDR2-sensitive |
| CATCTCCAGTAGAGATCGACTCGG | 0  | 12  | RDR2-sensitive |
| CATCTCCGGACGGCTAAGCCCACA | 0  | 10  | RDR2-sensitive |
| CATCTCGGACATACGATGGTGCGG | 0  | 12  | RDR2-sensitive |
| CATCTCGGCGTAGGTGAGCAGGCC | 0  | 9   | RDR2-sensitive |
| CATCTCGTGCGACTGTCCGGTGAG | 0  | 11  | RDR2-sensitive |
| CATCTCTGGACCGGATCCGACGCC | 0  | 22  | RDR2-sensitive |
| CATCTGAACCAAGGGGCCAGCCGG | 0  | 9   | RDR2-sensitive |
| CATCTGCTCAGGCTGTACGCGGAC | 0  | 12  | RDR2-sensitive |
| CATCTGGACTGGGGCACGCGGCAT | 1  | 18  | RDR2-sensitive |
| CATCTGGACTGGGGCACGCGGCGA | 0  | 39  | RDR2-sensitive |
| CATCTGGATGGCACTGCAACGGCA | 38 | 3   | RDR2-resistant |
| CATCTGGGCAGGGACACGCAGCAA | 0  | 21  | RDR2-sensitive |
| CATCTGGGCTAGGACACGCGGCGA | 0  | 20  | RDR2-sensitive |
| CATCTGGGCTAGGGCACGCGGCGA | 0  | 12  | RDR2-sensitive |
| CATCTGGGCTGGAGCACGCGGCGA | 1  | 23  | RDR2-sensitive |
| CATCTGGGCTGGGACACGCGGCGA | 3  | 121 | RDR2-sensitive |
| CATCTGGGCTGGGGCACGCAGCAC | 1  | 30  | RDR2-sensitive |
| CATCTGGGCTGGGGCACGCGACGA | 1  | 16  | RDR2-sensitive |
| CATCTGGGCTGGGGCACGCGGCAC | 3  | 46  | RDR2-sensitive |
| CATCTGGGCTGGGGCACGCGGCGA | 6  | 144 | RDR2-sensitive |
| CATCTGGGCTGGGGCACGTGGCGA | 0  | 10  | RDR2-sensitive |
| CATCTGTACGGCTGTACCGGAGGC | 0  | 10  | RDR2-sensitive |
| CATCTGTAGGCGGCGCAGCAGCAA | 1  | 12  | RDR2-sensitive |
| CATCTGTATCTAGGGCTGGGCATT | 0  | 11  | RDR2-sensitive |
| CATCTGTGGGAGCGCATGCAACGT | 0  | 11  | RDR2-sensitive |
| CATCTGTGTCTATGATTTGTCGGT | 0  | 9   | RDR2-sensitive |
| CATCTGTGTTAGGATTGAAAACGG | 0  | 25  | RDR2-sensitive |
| CATCTTAGGACTTAGGGCGGGTGC | 0  | 16  | RDR2-sensitive |
| CATCTTAGGATTAGGGCGGGTGCA | 0  | 10  | RDR2-sensitive |

|                          |    |     |                |
|--------------------------|----|-----|----------------|
| CATCTTAGGATTTAGGGCGGGTGC | 0  | 16  | RDR2-sensitive |
| CATCTTCCACAGCTCGAACGACGT | 0  | 10  | RDR2-sensitive |
| CATCTTGACCTGTAGTGTCGGCAT | 1  | 43  | RDR2-sensitive |
| CATCTTGATATGTGACGGTGGCT  | 0  | 23  | RDR2-sensitive |
| CATCTTGTTGGTCCGTAAAGGTAT | 0  | 14  | RDR2-sensitive |
| CATCTTTGGATTAGGACAGGTGTG | 0  | 20  | RDR2-sensitive |
| CATGAACCGAGCGAACCGACGACC | 0  | 11  | RDR2-sensitive |
| CATGAACCTCGGACGGCTGTTGAA | 0  | 9   | RDR2-sensitive |
| CATGAACTCGGCAGCGGTAGAAGG | 0  | 12  | RDR2-sensitive |
| CATGAAGATCGGGCATCGTGACGC | 0  | 9   | RDR2-sensitive |
| CATGACACGTTAGACGGCCTGGAC | 0  | 9   | RDR2-sensitive |
| CATGACAGACCTGCTGCAACACGC | 0  | 10  | RDR2-sensitive |
| CATGACCGCAGAGGATTGTGGTAT | 0  | 23  | RDR2-sensitive |
| CATGACCTGCCGTAGAAGCGACTC | 0  | 12  | RDR2-sensitive |
| CATGACGAAGACCTGGGCATCTGG | 0  | 10  | RDR2-sensitive |
| CATGACGACGACGGCTCTCAGCCC | 0  | 11  | RDR2-sensitive |
| CATGACGGGCTATCGGCTAGACGA | 0  | 9   | RDR2-sensitive |
| CATGACTCGGTGTGGGAAGGATGG | 0  | 10  | RDR2-sensitive |
| CATGACTCTGGTCACTGTTACGG  | 27 | 1   | RDR2-resistant |
| CATGACTGCAGAGGATTGTGGTAT | 0  | 76  | RDR2-sensitive |
| CATGACTGGTCTCTGTGGAAGCGT | 0  | 14  | RDR2-sensitive |
| CATGAGCAGCTCAGGACTCTCTGA | 0  | 15  | RDR2-sensitive |
| CATGAGGACTACCAGATCGTGGCT | 0  | 18  | RDR2-sensitive |
| CATGAGGATGAGGAGAAGGAGGGT | 16 | 0   | RDR2-resistant |
| CATGAGTCGGCAGCTGAAGGAGAA | 0  | 17  | RDR2-sensitive |
| CATGAGTCTGGTGTATGTTGGCAT | 60 | 0   | RDR2-resistant |
| CATGATCGGTTAACTGCATAGCAT | 0  | 20  | RDR2-sensitive |
| CATGATCGGTTACCTGCATAGCAT | 0  | 16  | RDR2-sensitive |
| CATGCAGACTGTGACAGCTGGGTC | 0  | 12  | RDR2-sensitive |
| CATGCAGGGTGACGATGACATGAA | 16 | 0   | RDR2-resistant |
| CATGCAGTTGTAGGCTGACGCCAA | 0  | 136 | RDR2-sensitive |
| CATGCAGTTGTAGGCTGACGCCCA | 0  | 9   | RDR2-sensitive |
| CATGCCAGATTGGAGGACCAGGCA | 0  | 13  | RDR2-sensitive |
| CATGCCTTCCTTGATTCTGGCGT  | 0  | 10  | RDR2-sensitive |
| CATGCCTTTGTAGATCCGAGCGGC | 0  | 12  | RDR2-sensitive |
| CATGCGAACGGGAAGTAGCGCGCC | 0  | 10  | RDR2-sensitive |
| CATGCGACTGGCACAACGTCCGAT | 35 | 4   | RDR2-resistant |
| CATGCGAGACAGACTGGAGGCCAG | 0  | 11  | RDR2-sensitive |
| CATGCGAGCACCAGATGCTGACAT | 0  | 17  | RDR2-sensitive |
| CATGCGGAGGACATAGATGCGGAT | 2  | 23  | RDR2-sensitive |
| CATGCGGGAAGAGACGGAATTCAT | 5  | 28  | RDR2-sensitive |
| CATGCGGGGATGGTCGTTGGCAGC | 79 | 2   | RDR2-resistant |
| CATGCGTCAGCACACGAGAGGCAT | 0  | 9   | RDR2-sensitive |
| CATGCGTGTGTAGAAGCGACGGAG | 0  | 20  | RDR2-sensitive |
| CATGCTAATCTTCTCTGTATCGTT | 93 | 2   | RDR2-resistant |
| CATGCTCTGTTCCCATCTCGGCGT | 2  | 15  | RDR2-sensitive |
| CATGCTGCAGAACTGAAGGGGTGT | 0  | 16  | RDR2-sensitive |
| CATGCTGCTCCGGCTGAAGATCGT | 0  | 11  | RDR2-sensitive |
| CATGCTGCTTGGGACCGACGGAAA | 0  | 10  | RDR2-sensitive |

|                           |    |    |                |
|---------------------------|----|----|----------------|
| CATGCTGTAGAAGAGGGTACCCCT  | 2  | 48 | RDR2-sensitive |
| CATGCTGTAGAAGATGGTACCCCT  | 0  | 13 | RDR2-sensitive |
| CATGCTGTAGGAGAGGGTACCCCT  | 0  | 12 | RDR2-sensitive |
| CATGCTGTAGTAAGGTGTACCCCT  | 0  | 10 | RDR2-sensitive |
| CATGCTGTTCGGTACGTGATGTCAT | 0  | 11 | RDR2-sensitive |
| CATGCTGTTCGTTGGTAAAGAGGTT | 17 | 0  | RDR2-resistant |
| CATGCTGTTAGATCGCGGACCATC  | 0  | 11 | RDR2-sensitive |
| CATGCTTTGGATAGGAAATGGGCA  | 17 | 1  | RDR2-resistant |
| CATGCTTTGGTCTGGGCTTGGTAT  | 0  | 10 | RDR2-sensitive |
| CATGCTTTTGTCTGGGCTTGGTAT  | 0  | 13 | RDR2-sensitive |
| CATGGAATACCCCTGGAACGACGA  | 18 | 0  | RDR2-resistant |
| CATGGACAGAGATCTGAGGAGCGG  | 0  | 24 | RDR2-sensitive |
| CATGGACCTCGCGGACGAACGGCT  | 56 | 14 | RDR2-resistant |
| CATGGACCTGATGGCTTTAATGGC  | 22 | 1  | RDR2-resistant |
| CATGGACGAAGACGCAGGCAACCG  | 0  | 9  | RDR2-sensitive |
| CATGGACGACAGCATCAAGGACCT  | 0  | 9  | RDR2-sensitive |
| CATGGACGACGTAGCATCAACGGT  | 0  | 14 | RDR2-sensitive |
| CATGGACGAGCAGACACGACACAG  | 0  | 14 | RDR2-sensitive |
| CATGGACGGCGGGGAGGGTTCGCGC | 38 | 3  | RDR2-resistant |
| CATGGACTGCCGGACGTTGGTCCG  | 0  | 18 | RDR2-sensitive |
| CATGGACTGTCCAGCCTTAGGCCG  | 0  | 23 | RDR2-sensitive |
| CATGGACTGTGGCGTCATCTCGGC  | 0  | 23 | RDR2-sensitive |
| CATGGACTTGACAGCGGTAGGAGA  | 1  | 16 | RDR2-sensitive |
| CATGGATACGGATACGGATAGCAC  | 0  | 13 | RDR2-sensitive |
| CATGGATACGGATACGGGTAGCAC  | 0  | 11 | RDR2-sensitive |
| CATGGATGGGAGGAAGAAGATGAA  | 0  | 10 | RDR2-sensitive |
| CATGGATGGTAGAGGTGCAGTGAG  | 0  | 11 | RDR2-sensitive |
| CATGGCAATGTGGCTGGCATGACT  | 41 | 1  | RDR2-resistant |
| CATGGCACTGAGGTAACACCGCTC  | 0  | 13 | RDR2-sensitive |
| CATGGCAGATGTGGACGTCTACAC  | 0  | 25 | RDR2-sensitive |
| CATGGCAGTGTAGGACGGAGTTGA  | 0  | 41 | RDR2-sensitive |
| CATGGCCTTGTCGTTGGAGAGCAT  | 0  | 9  | RDR2-sensitive |
| CATGGCTAAGAACCGTGTGATCGT  | 0  | 12 | RDR2-sensitive |
| CATGGGACAGTAGCTCAACGGCTA  | 0  | 10 | RDR2-sensitive |
| CATGGGCTGTTGGGTGCCGGTCGG  | 0  | 12 | RDR2-sensitive |
| CATGGGGACTCAGAAGGAATCGGT  | 14 | 0  | RDR2-resistant |
| CATGGGTCTGTAGAGGGCGGGCAT  | 0  | 18 | RDR2-sensitive |
| CATGGTAGAATAAGCGGGCGGGCT  | 0  | 22 | RDR2-sensitive |
| CATGGTCGTCACCGTTCGTCTGGGC | 1  | 20 | RDR2-sensitive |
| CATGGTCGTCATCGTTCGTCTGGGC | 0  | 9  | RDR2-sensitive |
| CATGGTGAGGATGACGAGTGACGC  | 0  | 10 | RDR2-sensitive |
| CATGGTGAGGATGAGGATGACGGG  | 1  | 31 | RDR2-sensitive |
| CATGGTTCGTGGGTCTGGGCCGGA  | 0  | 12 | RDR2-sensitive |
| CATGTAACGCACGTTCCGACGCCT  | 0  | 54 | RDR2-sensitive |
| CATGTACAGACGCTGGATCCTCGG  | 0  | 10 | RDR2-sensitive |
| CATGTAAGTGTAGAGTGTCCGGTGC | 0  | 42 | RDR2-sensitive |
| CATGTAGCAGAACAGGACACGCAT  | 0  | 13 | RDR2-sensitive |
| CATGTCAGAGCTCCGTGCCATGGA  | 0  | 13 | RDR2-sensitive |
| CATGTCAGAGGCAGAACACGTCAG  | 0  | 9  | RDR2-sensitive |

|                           |    |    |                |
|---------------------------|----|----|----------------|
| CATGTCAGAGGCAGAACGGCAGAC  | 0  | 13 | RDR2-sensitive |
| CATGTCAGCGATAGGAACGGCCA   | 0  | 11 | RDR2-sensitive |
| CATGTCATATTAGATGTGTCGGCG  | 34 | 0  | RDR2-resistant |
| CATGTCATGTTGAGCTTAGATGGT  | 0  | 27 | RDR2-sensitive |
| CATGTCCAGGACTGTGGAAGCGGT  | 0  | 14 | RDR2-sensitive |
| CATGTCCCTGAACCAGCACACTGC  | 0  | 10 | RDR2-sensitive |
| CATGTGACATCACGTAGGGGCAG   | 2  | 18 | RDR2-sensitive |
| CATGTGCGTAGGACAGTTCGGCT   | 0  | 17 | RDR2-sensitive |
| CATGTGCGGGCTGAGGTCGGACGG  | 0  | 10 | RDR2-sensitive |
| CATGTGCTCCCCTGTTACGGTGTG  | 0  | 9  | RDR2-sensitive |
| CATGTGCTGTCTTCGTTGGGTCGT  | 0  | 14 | RDR2-sensitive |
| CATGTCTAGATCGTGCCGGGCCGG  | 0  | 13 | RDR2-sensitive |
| CATGTCTGTGTACGTCAAACGGTT  | 0  | 9  | RDR2-sensitive |
| CATGTCTTCAGTTAGCGTGTGGT   | 19 | 0  | RDR2-resistant |
| CATGTCTTCTCGGGCAGCGTGGT   | 0  | 15 | RDR2-sensitive |
| CATGTGGAAGACGACTGACATCAT  | 0  | 47 | RDR2-sensitive |
| CATGTGGAAGACGGCTGGCATCAT  | 0  | 14 | RDR2-sensitive |
| CATGTGGACCCAAACAGTGGACGC  | 0  | 35 | RDR2-sensitive |
| CATGTGGACTATAGAGGGCTTCAC  | 0  | 9  | RDR2-sensitive |
| CATGTGGAGTAGCTCAAGCGGCCT  | 4  | 21 | RDR2-sensitive |
| CATGTTGAAGCTCTGCATTGACGT  | 19 | 0  | RDR2-resistant |
| CATGTTGGACGACATACCGGCCTT  | 0  | 20 | RDR2-sensitive |
| CATGTTGGATAAAATGGCGTGAGA  | 32 | 5  | RDR2-resistant |
| CATGTTGGCTAGAATGTAGAAGGC  | 0  | 15 | RDR2-sensitive |
| CATGTTGGCTAGAGGGTGGAAAGGC | 1  | 43 | RDR2-sensitive |
| CATGTTGGTGACTGACGGCCGCGC  | 0  | 10 | RDR2-sensitive |
| CATGTTGGTGAGCGGAGCGAAGGC  | 1  | 12 | RDR2-sensitive |
| CATGTTTGACGATGGACAGCGCGG  | 0  | 11 | RDR2-sensitive |
| CATGTTTGGTGGGCTGGTTGAGGA  | 0  | 11 | RDR2-sensitive |
| CATGTTTGTCTTCTTCGTCGCGCA  | 17 | 0  | RDR2-resistant |
| CATGTTTTAATAACGTGTCGGGC   | 0  | 11 | RDR2-sensitive |
| CATTAACGACATGAAGAACGTCAT  | 0  | 9  | RDR2-sensitive |
| CATTAAGCGTGTCGGGCTTGGCAA  | 0  | 13 | RDR2-sensitive |
| CATTAGATCTAGATCGGATGCACC  | 0  | 16 | RDR2-sensitive |
| CATTAGGATTCCTGTAGTGTGGC   | 0  | 9  | RDR2-sensitive |
| CATTCATGCTGTTAGATCGCGGAC  | 0  | 24 | RDR2-sensitive |
| CATTCGGAACCCAGAACACGCGCA  | 0  | 24 | RDR2-sensitive |
| CATTCGGCTGGAGGACAAGGGCAA  | 1  | 14 | RDR2-sensitive |
| CATTCTATCTTTAAGTCGGTTCGA  | 3  | 30 | RDR2-sensitive |
| CATTCTGCTGAGCGCGGACGGTCC  | 0  | 11 | RDR2-sensitive |
| CATTCTGTTTGTGGTTCTTTCGGT  | 65 | 4  | RDR2-resistant |
| CATTCTTGCATCCAGGTCGCGGAC  | 2  | 15 | RDR2-sensitive |
| CATTGACCAATGACCCAGGGACGC  | 0  | 11 | RDR2-sensitive |
| CATTGACCGTATCTCTGATGGCAT  | 0  | 12 | RDR2-sensitive |
| CATTGCCTGTAGAGCGTGTGCGCG  | 2  | 20 | RDR2-sensitive |
| CATTGCGTCATGTGGACCGTTCGA  | 0  | 9  | RDR2-sensitive |
| CATTGGACTGTCCGGTGTGCCCAT  | 0  | 33 | RDR2-sensitive |
| CATTGGGTAAGTAGGACGGCTAA   | 0  | 10 | RDR2-sensitive |
| CATTGGTGGATTGGTGGGAGGAAG  | 20 | 0  | RDR2-resistant |

|                           |    |     |                |
|---------------------------|----|-----|----------------|
| CATTGTAACCTCGAGCTGAATACGT | 0  | 17  | RDR2-sensitive |
| CATTGTAAGTACTGTGACGGAACC  | 0  | 11  | RDR2-sensitive |
| CATTGTCAGCTCTAGATGTAGGTA  | 0  | 9   | RDR2-sensitive |
| CATTGTCCTTGGGCAAGACGCGCT  | 20 | 0   | RDR2-resistant |
| CATTGTTGACTGTGAAGCCGGAGA  | 41 | 1   | RDR2-resistant |
| CATTTACGTGGGGCAGCAGGCTGC  | 1  | 16  | RDR2-sensitive |
| CATTTAGAGGACGCTGCTGGAGAG  | 0  | 10  | RDR2-sensitive |
| CATTTATTTCTGGTCACTCGTCGG  | 0  | 10  | RDR2-sensitive |
| CATTTCCGGCTTAGACTGGACCGG  | 1  | 14  | RDR2-sensitive |
| CATTTCCGTTTGTAGATGGTTCGTA | 14 | 0   | RDR2-resistant |
| CATTTCTATCCTTCGTCGGCCAAC  | 0  | 16  | RDR2-sensitive |
| CATTTGCTTGACTGTGGCGACGCC  | 0  | 13  | RDR2-sensitive |
| CATTTGGAGGGTAGACGATGGCTC  | 0  | 15  | RDR2-sensitive |
| CATTTGGGCTGGTAGGCGGTACAT  | 0  | 9   | RDR2-sensitive |
| CATTTTACCTGGACAGGATGGCTC  | 0  | 14  | RDR2-sensitive |
| CATTTTCCATCCAACGGTCGTCGC  | 0  | 18  | RDR2-sensitive |
| CATTTTGCTACAGTCGTCGACACC  | 16 | 102 | RDR2-sensitive |
| CATTTTGTAGATAGATGGATCAGT  | 51 | 10  | RDR2-resistant |
| CATTTTGTTGTGGAGTGTAAGGCA  | 22 | 2   | RDR2-resistant |
| CATTTTGGACCCTTTGCTCGGCG   | 5  | 20  | RDR2-sensitive |
| CCAAAACACTCAGTCGGGCTTCAC  | 0  | 13  | RDR2-sensitive |
| CCAAAAGCTGCTGCGGACTGCCAA  | 0  | 10  | RDR2-sensitive |
| CCAAAAGCTGTTGCGGACTGCCAA  | 0  | 9   | RDR2-sensitive |
| CCAAAATGAGCGGACGGTCCGGCC  | 0  | 12  | RDR2-sensitive |
| CCAAACACAGAACAGAGCGGCTCC  | 0  | 9   | RDR2-sensitive |
| CCAAACAGCGGACTGGAACGGCTC  | 0  | 12  | RDR2-sensitive |
| CCAAACAGCTGCAACAGTGTCCGGC | 1  | 47  | RDR2-sensitive |
| CCAAACCTGCAGGACTAGGCCCAT  | 0  | 10  | RDR2-sensitive |
| CCAAAGAAGAGGGCAACGTAGGGG  | 23 | 0   | RDR2-resistant |
| CCAAAGACTGGCACATGACGAGGA  | 0  | 10  | RDR2-sensitive |
| CCAAAGCGACTGGAGGGCAGAGGA  | 0  | 10  | RDR2-sensitive |
| CCAAAGTTGACTGGGAGACGACGA  | 5  | 85  | RDR2-sensitive |
| CCAAAGTTGACTGGGAGACGACGG  | 4  | 204 | RDR2-sensitive |
| CCAAATTCTTGGTAGAATCGATGG  | 25 | 1   | RDR2-resistant |
| CCAACACAGCTAGCAGGTCCGCAT  | 0  | 13  | RDR2-sensitive |
| CCAACACTCTTAAGCACGGCTGGT  | 0  | 13  | RDR2-sensitive |
| CCAACAGCAGTAGGGACGTGAGAA  | 2  | 35  | RDR2-sensitive |
| CCAACCAAAGGGCTGGATCCAGGA  | 0  | 43  | RDR2-sensitive |
| CCAACCAAAGGGCTGGATCTAGGA  | 0  | 22  | RDR2-sensitive |
| CCAACCGAAACCGTAGAGAGGGCC  | 28 | 1   | RDR2-resistant |
| CCAACCGAAGGATAGAGCAGACGA  | 0  | 31  | RDR2-sensitive |
| CCAACCTAATTGTGGGACTGGGCC  | 0  | 14  | RDR2-sensitive |
| CCAACCTGAACGACGTGGCGCCAA  | 2  | 18  | RDR2-sensitive |
| CCAACGGACGAGGGTTGCAATCAA  | 1  | 30  | RDR2-sensitive |
| CCAACGGAGTAGAGCAGAACGGTT  | 0  | 10  | RDR2-sensitive |
| CCAACGGTCCGGCCGGGCCAACGGT | 45 | 106 | RDR2-sensitive |
| CCAACGGTCCGGCTGGGCCAACGGT | 0  | 16  | RDR2-sensitive |
| CCAACGGTGCTGTGTCAGGGGGTT  | 15 | 34  | RDR2-sensitive |
| CCAACCTGAATTCCTGGCTGAGGC  | 0  | 9   | RDR2-sensitive |

|                          |    |    |                |
|--------------------------|----|----|----------------|
| CCAAGTGTAGGATCTCGAAGGCGA | 0  | 12 | RDR2-sensitive |
| CCAATAGATCGTGCCGTGGGCCAA | 0  | 10 | RDR2-sensitive |
| CCAATAGCCTGATCGTTGGATTAA | 0  | 11 | RDR2-sensitive |
| CCAATCTAATTGTGGGTCTGGGCC | 1  | 27 | RDR2-sensitive |
| CCAATCTCTGCATCGCGTGGACGC | 0  | 10 | RDR2-sensitive |
| CCAATGACTGGAAGTAGGGACGTT | 0  | 9  | RDR2-sensitive |
| CCAATGATTGAGGATTGACACGAC | 19 | 1  | RDR2-resistant |
| CCAATGCAACGGGCCTGTACGGAC | 0  | 12 | RDR2-sensitive |
| CCAATGGAAGTTGGCTGCGAGCAT | 0  | 12 | RDR2-sensitive |
| CCAATGGGTGTGGGCAAGGGACGG | 2  | 20 | RDR2-sensitive |
| CCAATGGTTGAGGATCTAGACGAC | 32 | 0  | RDR2-resistant |
| CCACAAGTCAGAGCTCCAACGGTC | 2  | 15 | RDR2-sensitive |
| CCACAATCTGGACTGTCCGGCTAT | 0  | 25 | RDR2-sensitive |
| CCACACGAACTGGAAGAAGTGCAA | 0  | 23 | RDR2-sensitive |
| CCACACGAACTGGAGAAAGTGCAA | 0  | 21 | RDR2-sensitive |
| CCACAGGCGCGGACCGTCCGGACC | 0  | 16 | RDR2-sensitive |
| CCACAGGCGCGGACTGTCCGGACC | 0  | 14 | RDR2-sensitive |
| CCACATCCAACGGTGCTGCGTCAG | 0  | 9  | RDR2-sensitive |
| CCACATGTCAGAAGCTCCAACGGT | 0  | 13 | RDR2-sensitive |
| CCACCAAAGCTGCTGCGGACTGC  | 0  | 11 | RDR2-sensitive |
| CCACCAGCGGTCTCGGTAGGCTAG | 0  | 14 | RDR2-sensitive |
| CCACCAGTGAACAGATCTGCTCGG | 52 | 0  | RDR2-resistant |
| CCACCATCACCAGCGTCCGGCGTT | 0  | 12 | RDR2-sensitive |
| CCACCCAAGACGGATCTAGACGAC | 1  | 23 | RDR2-sensitive |
| CCACCGCGTCGACGCAGGAACGGT | 0  | 12 | RDR2-sensitive |
| CCACCGCGTCGACGTAGGAACGGT | 0  | 25 | RDR2-sensitive |
| CCACCGCGTCCGTGTAGGAACGGT | 0  | 20 | RDR2-sensitive |
| CCACCGGACGTCCCTAGACCGCAT | 0  | 16 | RDR2-sensitive |
| CCACCGGAGAAGGCAACCAAACGC | 0  | 14 | RDR2-sensitive |

|                           |    |    |                |
|---------------------------|----|----|----------------|
| CCACCGGAGTCCGACCTGACGGTT  | 0  | 10 | RDR2-sensitive |
| CCACCTGTGGATTGTGGAGGTGTG  | 0  | 9  | RDR2-sensitive |
| CCACGAAAGGAACAGACGGCTCAT  | 1  | 22 | RDR2-sensitive |
| CCACGAACAGACATGGTACGGCTC  | 0  | 22 | RDR2-sensitive |
| CCACGAACCGGACGGCACACCTGC  | 0  | 11 | RDR2-sensitive |
| CCACGACCTAGAACCGGACGGTCC  | 0  | 12 | RDR2-sensitive |
| CCACGACTTGGACACGGGAGCGGC  | 0  | 15 | RDR2-sensitive |
| CCACGAGTCGGTATGGCACAACAC  | 0  | 21 | RDR2-sensitive |
| CCACGATCTGGACACAGAAGCGGC  | 1  | 14 | RDR2-sensitive |
| CCACGCGCCTGCAGAGAAGAGCAT  | 0  | 9  | RDR2-sensitive |
| CCACGCTCCGGACTGAATGCGCAC  | 0  | 9  | RDR2-sensitive |
| CCACGGATCTGAGGAAGAAGACGC  | 0  | 32 | RDR2-sensitive |
| CCACGGCTAGGAACCAGACGGTCT  | 0  | 25 | RDR2-sensitive |
| CCACGGCTGAAGCTCGGACGGTCC  | 0  | 12 | RDR2-sensitive |
| CCACGGCTGCAGCGGTGTCCCTAC  | 0  | 14 | RDR2-sensitive |
| CCACGGTACATGACTGGACGGTCC  | 0  | 9  | RDR2-sensitive |
| CCACGGTCCGGACTGTCCGCGGTG  | 0  | 17 | RDR2-sensitive |
| CCACGGTCGTCGCGAAGCCGCGCT  | 1  | 12 | RDR2-sensitive |
| CCACGGTCTGAACGGTACGCGCGT  | 0  | 13 | RDR2-sensitive |
| CCACGTATCCCGGCTGAGACGCGA  | 0  | 13 | RDR2-sensitive |
| CCACGTCACGAAGCTCGGCGCCAC  | 0  | 17 | RDR2-sensitive |
| CCACGTCACGAAGCTCGGCGCCAT  | 0  | 36 | RDR2-sensitive |
| CCACGTCAGGAAGCTCGGCGCCAC  | 0  | 9  | RDR2-sensitive |
| CCACGTCAGGAAGCTCGGCGCCAT  | 0  | 9  | RDR2-sensitive |
| CCACGTCAGGCAGACAGGCGCCAA  | 0  | 11 | RDR2-sensitive |
| CCACGTCATGAAGCTCGGCGCCAT  | 0  | 26 | RDR2-sensitive |
| CCACGTGGTGTGAGCTGTGACGGC  | 73 | 12 | RDR2-resistant |
| CCACGTTGGAAGAGCTGTTCGGTT  | 0  | 10 | RDR2-sensitive |
| CCACGTTGGCATGTACACAGGGCT  | 7  | 48 | RDR2-sensitive |
| CCACGTTGGCATGTACATAGGGCT  | 1  | 29 | RDR2-sensitive |
| CCACTAGATTGTAGGGGTGGTCGG  | 0  | 10 | RDR2-sensitive |
| CCACTACGGACTCATCAGGGCAT   | 1  | 19 | RDR2-sensitive |
| CCACTCGAGACTAGCACAGGGGCG  | 0  | 11 | RDR2-sensitive |
| CCACTCTGACCTGACGAACGACAC  | 0  | 19 | RDR2-sensitive |
| CCACTCTGGTCGACGGAAGGGCAA  | 0  | 13 | RDR2-sensitive |
| CCACTGAACCGGACGTTGGCGCGC  | 0  | 33 | RDR2-sensitive |
| CCACTGACCGGCTGACAGAAGGA   | 5  | 23 | RDR2-sensitive |
| CCACTGACCGGTCTGACAGAAGGA  | 2  | 20 | RDR2-sensitive |
| CCACTGCGCTGTAGGGTCGGTCAG  | 0  | 9  | RDR2-sensitive |
| CCACTGCGTTTTGGTGTAGAGATGG | 0  | 13 | RDR2-sensitive |
| CCACTGGAGAAAGCCTGAGGCTGC  | 0  | 11 | RDR2-sensitive |
| CCACTGGCCAGTCTGACAGAAGGA  | 1  | 13 | RDR2-sensitive |
| CCACTGGGCTTTGACACACGACGG  | 0  | 13 | RDR2-sensitive |
| CCACTGTACATGCCCTGAAGACGA  | 0  | 15 | RDR2-sensitive |
| CCACTGTAGACCAGGCAACACCAC  | 0  | 11 | RDR2-sensitive |
| CCACTGTAGCGGTAGAGGATGAT   | 0  | 21 | RDR2-sensitive |
| CCACTGTATGGCTTCGGCGGCAAG  | 35 | 1  | RDR2-resistant |
| CCACTGTCAGTTCTCAATCGGCCT  | 0  | 12 | RDR2-sensitive |
| CCACTGTTATGCGGGCTGAGCCGG  | 1  | 16 | RDR2-sensitive |



|                           |    |     |                |
|---------------------------|----|-----|----------------|
| CCACTGTTTTTACACTTCGGGCTG  | 0  | 28  | RDR2-sensitive |
| CCACTTATTCGTATCGTGCCGGGC  | 0  | 15  | RDR2-sensitive |
| CCACTTCTGGCACTGTGGTTTGCC  | 0  | 13  | RDR2-sensitive |
| CCACTTGTAGGAAACGGGTGACGC  | 0  | 9   | RDR2-sensitive |
| CCACTTGTGCGGACAGGCATGGAC  | 0  | 10  | RDR2-sensitive |
| CCACTTTGTGGACTTGCTCGACGG  | 0  | 10  | RDR2-sensitive |
| CCAGAACCAGATCGAGCGCGCGTA  | 1  | 36  | RDR2-sensitive |
| CCAGAACTCCCGCTCAGCAGAGAC  | 22 | 0   | RDR2-resistant |
| CCAGAACTCCCGCTCAGTAGAGAC  | 97 | 36  | RDR2-resistant |
| CCAGAACTCCTGATCCATAGAGAC  | 38 | 1   | RDR2-resistant |
| CCAGAACTCTGCAGGTAGAGCTGT  | 2  | 161 | RDR2-sensitive |
| CCAGAAGACAGAAGCTCCAACGGT  | 0  | 11  | RDR2-sensitive |
| CCAGAAGACGACGAACCCGCTTC   | 0  | 9   | RDR2-sensitive |
| CCAGAAGCTACTGCGGACTGTCAA  | 0  | 9   | RDR2-sensitive |
| CCAGAAGGACTTCGTGGACCCGGC  | 0  | 11  | RDR2-sensitive |
| CCAGACATGTGTGGTTCCTTGAG   | 34 | 0   | RDR2-resistant |
| CCAGACCAGACGAGTAGACGACGC  | 0  | 13  | RDR2-sensitive |
| CCAGACCCGCATAGAACCAGGCTC  | 0  | 9   | RDR2-sensitive |
| CCAGACGGATGGTAGAAAGGGTTA  | 0  | 9   | RDR2-sensitive |
| CCAGACGGTGTGTACGATAGACGT  | 0  | 12  | RDR2-sensitive |
| CCAGACTGAGCAGATTCTTGCTG   | 2  | 14  | RDR2-sensitive |
| CCAGACTGCTGACTGTACGGCTGT  | 0  | 9   | RDR2-sensitive |
| CCAGACTGTGCTCGATGACGGTGC  | 0  | 11  | RDR2-sensitive |
| CCAGACTGTTCCGGTGGCACATCGG | 0  | 9   | RDR2-sensitive |
| CCAGAGACTGTAAATGTGGCGGAT  | 0  | 18  | RDR2-sensitive |
| CCAGAGCTCTTCAAGTAGATTATT  | 23 | 0   | RDR2-resistant |
| CCAGAGCTGCGGACTGTCCGGCGT  | 0  | 9   | RDR2-sensitive |
| CCAGATACGGAAGGCGACTCCAAG  | 31 | 1   | RDR2-resistant |
| CCAGATACGGCTGCACGGTACTCC  | 0  | 52  | RDR2-sensitive |
| CCAGATAGATGGGAGGCAGAACGG  | 0  | 15  | RDR2-sensitive |
| CCAGATCGATGGACGGCAGAACGG  | 0  | 16  | RDR2-sensitive |
| CCAGATCTCCTGGAGGCAGAACGC  | 2  | 16  | RDR2-sensitive |
| CCAGATCTTGGCGAGGACGAGCAC  | 0  | 16  | RDR2-sensitive |
| CCAGATGAGTCGGCGCGAGACGGA  | 0  | 12  | RDR2-sensitive |
| CCAGATGGGTTCGGCGCGAGACGGA | 7  | 45  | RDR2-sensitive |
| CCAGATTGAGCGAAGGCAGAACGG  | 0  | 27  | RDR2-sensitive |
| CCAGCACGAATAAGCGGGTCGGGC  | 0  | 18  | RDR2-sensitive |
| CCAGCACGACTAGCAGGCTGACGG  | 0  | 13  | RDR2-sensitive |
| CCAGCACGGAAGGGAATAAGACGG  | 0  | 32  | RDR2-sensitive |
| CCAGCACGTGTGCCAGTCATCGG   | 0  | 11  | RDR2-sensitive |
| CCAGCATCTGTGGCGCGACGACGG  | 2  | 27  | RDR2-sensitive |
| CCAGCCTGGCGCACCGGACACTGT  | 0  | 15  | RDR2-sensitive |
| CCAGCGACTGCAGCGAAAGGCGAC  | 1  | 18  | RDR2-sensitive |
| CCAGCGACTGCAGCGAAGGCCCTCG | 0  | 14  | RDR2-sensitive |
| CCAGCGACTGCAGCGAGAGACGAC  | 2  | 21  | RDR2-sensitive |
| CCAGCGACTGCAGTGAAAGGCGAC  | 0  | 9   | RDR2-sensitive |
| CCAGCTATTTTCGTCCGGTTGGCCT | 0  | 20  | RDR2-sensitive |
| CCAGCTCGAGGTAGACGACGGCCT  | 0  | 37  | RDR2-sensitive |
| CCAGCTCGGCTCGGCTCGACTCGG  | 0  | 9   | RDR2-sensitive |

|                           |    |     |                |
|---------------------------|----|-----|----------------|
| CCAGCTGAGAATTAGGCGTCTTGA  | 0  | 15  | RDR2-sensitive |
| CCAGCTGTAGCAATGGGATGGTTA  | 0  | 27  | RDR2-sensitive |
| CCAGGAAACGCGGCTAGGGTTCGT  | 0  | 42  | RDR2-sensitive |
| CCAGGACACAGGAAGGGAAGGCAA  | 0  | 37  | RDR2-sensitive |
| CCAGGACCCTGACCTCGGTGACGG  | 0  | 9   | RDR2-sensitive |
| CCAGGACGCCAACCAGATCGCGGT  | 0  | 16  | RDR2-sensitive |
| CCAGGACGCCAACCAGGTCGCGGT  | 0  | 20  | RDR2-sensitive |
| CCAGGACGTAGGGTGTTACGCATC  | 0  | 11  | RDR2-sensitive |
| CCAGGACTTTGTTGCGGCCCGGAC  | 0  | 19  | RDR2-sensitive |
| CCAGGATCCGAAGACAGAGGAGGC  | 1  | 18  | RDR2-sensitive |
| CCAGGATTGCAGAGGCGGAATGGA  | 0  | 10  | RDR2-sensitive |
| CCAGGCACGCAGGACTGTGCAGGC  | 0  | 12  | RDR2-sensitive |
| CCAGGCACGCAGGACTGTGTAGGC  | 0  | 12  | RDR2-sensitive |
| CCAGGCACGGCACGGTTAGAGCAC  | 0  | 22  | RDR2-sensitive |
| CCAGGCACGGCACTAAGAACGGGC  | 0  | 20  | RDR2-sensitive |
| CCAGGCACGGCATGGTTAGAGCAC  | 0  | 21  | RDR2-sensitive |
| CCAGGCACGTAGGACTGTGCAGGC  | 0  | 101 | RDR2-sensitive |
| CCAGGCACGTGGGCTCTTAGGCA   | 0  | 9   | RDR2-sensitive |
| CCAGGCATGTAGGACTGTGCAGGC  | 0  | 13  | RDR2-sensitive |
| CCAGGCCTGTGGATTGTTGCGGG   | 55 | 8   | RDR2-resistant |
| CCAGGCTCCCGGACTGGACCAGGC  | 0  | 30  | RDR2-sensitive |
| CCAGGCTGAGGACTGTGCGGACGG  | 0  | 13  | RDR2-sensitive |
| CCAGGCTTCTGACAGCACTGACAA  | 0  | 16  | RDR2-sensitive |
| CCAGGGAACAGTAGCACAAACGGTT | 0  | 9   | RDR2-sensitive |
| CCAGGGAACGTAGCCCAACGGCT   | 0  | 15  | RDR2-sensitive |
| CCAGGGACCTGCCGACTTGACGGA  | 0  | 13  | RDR2-sensitive |
| CCAGGTAGAGATGAGAGAGGACAT  | 0  | 9   | RDR2-sensitive |
| CCAGGTCAGACAGTGCAATCCGGT  | 0  | 11  | RDR2-sensitive |
| CCAGGTCGCGGACCGTTCGGCCCC  | 0  | 14  | RDR2-sensitive |
| CCAGGTCGCGGACTGTCCGGCCCC  | 2  | 14  | RDR2-sensitive |
| CCAGGTCGGGTGCGCTTGACAGTAG | 12 | 129 | RDR2-sensitive |
| CCAGGTCGTGACTGAGCTGCCGGT  | 0  | 26  | RDR2-sensitive |
| CCAGGTCGTGGACTGTACGGCCAC  | 0  | 10  | RDR2-sensitive |
| CCAGGTGCTCTGACCGGCGCGCAC  | 0  | 13  | RDR2-sensitive |
| CCAGGTGCTCTTGACGATCGTCGT  | 0  | 9   | RDR2-sensitive |
| CCAGGTTGCGCTCGGTCGTCTGGC  | 0  | 12  | RDR2-sensitive |
| CCAGGTTGAAGAGGCTGATCAGGC  | 0  | 10  | RDR2-sensitive |
| CCAGGTTGGCCTGAGGCTTGTCGT  | 0  | 82  | RDR2-sensitive |
| CCAGGTTGTAGAGGTAATCGGCCT  | 0  | 47  | RDR2-sensitive |
| CCAGTAGTAGTGCTGGAACGGCAT  | 0  | 9   | RDR2-sensitive |
| CCAGTCAGGACGCGGTCAACCCAG  | 0  | 25  | RDR2-sensitive |
| CCAGTCATAGACACGGGATGGCAT  | 1  | 47  | RDR2-sensitive |
| CCAGTCATTCGTGAGATCGGCTC   | 0  | 16  | RDR2-sensitive |
| CCAGTCCACGGTCTGCTATGGCGC  | 0  | 9   | RDR2-sensitive |
| CCAGTCGACAGAAGGCAAGATCAG  | 0  | 27  | RDR2-sensitive |
| CCAGTCGAGAGTCGAGCGAGGCAG  | 0  | 10  | RDR2-sensitive |
| CCAGTCGCTGCTAGAGGACGTGTG  | 0  | 88  | RDR2-sensitive |
| CCAGTCTGTAGGATCTAGGACACC  | 0  | 9   | RDR2-sensitive |
| CCAGTGAGCGTAGGCATGCAACGG  | 0  | 9   | RDR2-sensitive |

|                           |    |     |                |
|---------------------------|----|-----|----------------|
| CCAGTGCACAGGCTGCAGCAGGCT  | 0  | 10  | RDR2-sensitive |
| CCAGTGCACAGGCTGTAGCAGGCT  | 1  | 55  | RDR2-sensitive |
| CCAGTGGAAAGCGGACGCATCGATA | 63 | 2   | RDR2-resistant |
| CCAGTTGGCCCAATTGTAGTCGGA  | 0  | 11  | RDR2-sensitive |
| CCAGTTGGGCCCGAATACGCGCAT  | 0  | 15  | RDR2-sensitive |
| CCAGTTTCAACGGTCGTCATGCGT  | 0  | 24  | RDR2-sensitive |
| CCATAAACTGTAGCGGGTTTTCGG  | 1  | 16  | RDR2-sensitive |
| CCATAAAGTTTGTAGCACGGGTGA  | 20 | 0   | RDR2-resistant |
| CCATACGATCAGCGGGCGAGACGC  | 0  | 18  | RDR2-sensitive |
| CCATAGTGGACGCGTAGAACGGCG  | 0  | 18  | RDR2-sensitive |
| CCATAGTAACTGAGAGACGACGG   | 0  | 18  | RDR2-sensitive |
| CCATAGTTGACTGGGAGACGACGA  | 0  | 18  | RDR2-sensitive |
| CCATAGTTGACTGGGAGACGACGG  | 0  | 44  | RDR2-sensitive |
| CCATATGGATTGAGGGGGATTGAG  | 0  | 9   | RDR2-sensitive |
| CCATATTTGACTGGACCGCGCAT   | 1  | 14  | RDR2-sensitive |
| CCATCACCATCGGACTGCCACGG   | 0  | 11  | RDR2-sensitive |
| CCATCACCGCGGGCTTAGAAGGCT  | 0  | 14  | RDR2-sensitive |
| CCATCACGGTCTGTACAGATGGAT  | 0  | 13  | RDR2-sensitive |
| CCATCACTAACGGGCTGACGTCAA  | 1  | 18  | RDR2-sensitive |
| CCATCAGACTGTGTTCAACGGTGT  | 0  | 52  | RDR2-sensitive |
| CCATCAGCGTCGACTAGGGATGGC  | 0  | 31  | RDR2-sensitive |
| CCATCAGTTATCTTGTCGGATGTT  | 18 | 0   | RDR2-resistant |
| CCATCCCGTCAGCAGTAGAGGCGC  | 2  | 36  | RDR2-sensitive |
| CCATCGACGGAGAGCAGATGGGGC  | 20 | 1   | RDR2-resistant |
| CCATCGCAGAAGGCCAGGTAGAGC  | 0  | 41  | RDR2-sensitive |
| CCATCGCCATCGTAGATCGTCCGG  | 0  | 14  | RDR2-sensitive |
| CCATCGGGTGACGGATATGGATAG  | 0  | 20  | RDR2-sensitive |
| CCATCGTCAAGCAGGGACCTCAT   | 0  | 47  | RDR2-sensitive |
| CCATCGTCAAGTAGGGGACCTCAT  | 0  | 39  | RDR2-sensitive |
| CCATCTCACTGTCAGGATCGCCAT  | 25 | 3   | RDR2-resistant |
| CCATCTCGCGGTCTGTTTGGCAG   | 0  | 9   | RDR2-sensitive |
| CCATCTCGGACATGCGACGATGGC  | 0  | 47  | RDR2-sensitive |
| CCATCTCGGACTCGCGACGGTGTC  | 0  | 15  | RDR2-sensitive |
| CCATCTCTGGACCGGATCCGACGC  | 0  | 9   | RDR2-sensitive |
| CCATCTGAACTGGGTCTGGCGCAT  | 0  | 11  | RDR2-sensitive |
| CCATCTGGATGGCACTGCAACGGC  | 47 | 2   | RDR2-resistant |
| CCATCTGGGCTGGAGCACGCGGCG  | 0  | 13  | RDR2-sensitive |
| CCATCTGGGCTGGGACACGCGGCG  | 9  | 53  | RDR2-sensitive |
| CCATCTGGGCTGGGGCACGCAGCA  | 0  | 18  | RDR2-sensitive |
| CCATCTGGGCTGGGGCACGCGGCA  | 8  | 55  | RDR2-sensitive |
| CCATCTGGGCTGGGGCACGCGGCG  | 31 | 147 | RDR2-sensitive |
| CCATCTTGGACCTGTGACGGTGGC  | 0  | 26  | RDR2-sensitive |
| CCATCTTGGATATGTGACGGTGGC  | 0  | 45  | RDR2-sensitive |
| CCATGAACATAGACCGGCCCCCAT  | 0  | 12  | RDR2-sensitive |
| CCATGAACCGAGCGAGCCAGCGAG  | 0  | 9   | RDR2-sensitive |
| CCATGAACTCGGCAGCGGTAGAAG  | 0  | 12  | RDR2-sensitive |
| CCATGACTTTAGGTTCGGACGGTTT | 0  | 10  | RDR2-sensitive |
| CCATGCGTGTGTAGAAGCGACGGA  | 2  | 34  | RDR2-sensitive |
| CCATGGAActCTTCCCTGACGG    | 1  | 19  | RDR2-sensitive |

|                           |    |     |                |
|---------------------------|----|-----|----------------|
| CCATGGATCTTGGCGCTGAGGTGT  | 0  | 9   | RDR2-sensitive |
| CCATGGATGTAGATGGGTTTGCAT  | 0  | 12  | RDR2-sensitive |
| CCATGGATTGAGTGGGATTGGAAA  | 0  | 9   | RDR2-sensitive |
| CCATGGATTGGATGGGATTGGAAA  | 0  | 22  | RDR2-sensitive |
| CCATGGGTTGTAGAACGACGGCCA  | 0  | 9   | RDR2-sensitive |
| CCATGGTAGTGGGGGCACTGAAGC  | 39 | 0   | RDR2-resistant |
| CCATGTAACGCACGTTCCGGACGCC | 0  | 10  | RDR2-sensitive |
| CCATGTAACGCACGTTCCGGACGCT | 0  | 9   | RDR2-sensitive |
| CCATGTCGTCCCCTGTTACGGTGT  | 0  | 179 | RDR2-sensitive |
| CCATGTCTGGAGCTCGGACGGCCT  | 0  | 37  | RDR2-sensitive |
| CCATGTGGATTGAGCGGGATTGGA  | 0  | 13  | RDR2-sensitive |
| CCATGTGGATTGAGTGGGATTGGA  | 2  | 23  | RDR2-sensitive |
| CCATGTGGCAAAGTACTCGGCAT   | 1  | 12  | RDR2-sensitive |
| CCATGTTCCGGGTCTCGGGTACGGT | 0  | 14  | RDR2-sensitive |
| CCATGTTTGTCACTGTTGAGGCAT  | 0  | 10  | RDR2-sensitive |
| CCATTACATTGGTCCGATTGGGCT  | 0  | 10  | RDR2-sensitive |
| CCATTAGTAGACATGCCGTCGGAT  | 35 | 2   | RDR2-resistant |
| CCATTAGTGGATTGGTGGGAGGAA  | 62 | 0   | RDR2-resistant |
| CCATTCAATCGGTAGGAGCGACGG  | 1  | 19  | RDR2-sensitive |
| CCATTCATGCTGTTAGATCGCGGA  | 0  | 12  | RDR2-sensitive |
| CCATTCCGTTGGCAGGCAGTACGC  | 0  | 11  | RDR2-sensitive |
| CCATTCCGAGGGACTCGATCACGCC | 1  | 12  | RDR2-sensitive |
| CCATTCTCGGCAGAGGGCGTAGGA  | 0  | 10  | RDR2-sensitive |
| CCATTCTCTATTCGATCTCGTCGT  | 0  | 9   | RDR2-sensitive |
| CCATTCTGCTGAGCGCGGACGGTC  | 0  | 9   | RDR2-sensitive |
| CCATTGCCTGTAGAGCGTGTCCGGC | 1  | 28  | RDR2-sensitive |
| CCATTGGTGGATTGGTGGGAGGAA  | 36 | 1   | RDR2-resistant |
| CCATTTAGCTACAGTCGGCGACAC  | 0  | 15  | RDR2-sensitive |
| CCATTTGCCACGGGGTTGATCGGA  | 0  | 15  | RDR2-sensitive |
| CCATTTTGCTACAGTCGGCGACAC  | 2  | 14  | RDR2-sensitive |
| CCATTTTGCTACAGTCGTCGACAC  | 2  | 43  | RDR2-sensitive |
| CCCAAAAACCTGATCCGTCGGCAC  | 0  | 9   | RDR2-sensitive |
| CCCAAAGAGGATTGGAGGGGCTAA  | 0  | 11  | RDR2-sensitive |
| CCCAAAGTGTAGACACAACGGCTC  | 0  | 9   | RDR2-sensitive |
| CCCAACGATCGGCTGACGTGGCAA  | 2  | 22  | RDR2-sensitive |
| CCCAACGGGCGGCGTGCTGAATCC  | 57 | 5   | RDR2-resistant |
| CCCAACGGTCCGGCTGACGTGGCAT | 0  | 9   | RDR2-sensitive |
| CCCAAGCACGTTGGGGTAGGCTAG  | 0  | 11  | RDR2-sensitive |
| CCCAAGCACTGTTAGATCCGGCAC  | 0  | 18  | RDR2-sensitive |
| CCCAATCTTTTCGTCGTCGCGCAT  | 0  | 9   | RDR2-sensitive |
| CCCACAATACTCGTGTCCGGTGCAT | 0  | 9   | RDR2-sensitive |
| CCCACACGGGCCTTCAGAACGGTT  | 0  | 10  | RDR2-sensitive |
| CCCACAGGCGCGGACCGTCCGGAC  | 3  | 21  | RDR2-sensitive |
| CCCACAGGCGCGGACTGTCCGGAC  | 3  | 167 | RDR2-sensitive |
| CCCACAGGCGCGGACTGTTCCGGAC | 0  | 18  | RDR2-sensitive |
| CCCACAGGCGTGGACTGTCCGGAC  | 0  | 13  | RDR2-sensitive |
| CCCACCTGTAGGTCCAGCAGATAA  | 0  | 9   | RDR2-sensitive |
| CCCACGAACCTTTCGAGAGACAT   | 0  | 16  | RDR2-sensitive |
| CCCACGAACCTTTCGGGGGGGCAT  | 2  | 19  | RDR2-sensitive |

|                           |    |    |                |
|---------------------------|----|----|----------------|
| CCCACGCACTGTTACGGCTCCAG   | 0  | 12 | RDR2-sensitive |
| CCCCTCAGGACCACTGAACCGGA   | 0  | 33 | RDR2-sensitive |
| CCCCTGACCAGTGGTACCGGACA   | 0  | 9  | RDR2-sensitive |
| CCCCTGCTAGTCCCCGACGACAT   | 0  | 10 | RDR2-sensitive |
| CCCAGAAGACAGAAGCTCCAACGG  | 0  | 15 | RDR2-sensitive |
| CCCAGAAGACAGAGCTCCAACGGT  | 0  | 11 | RDR2-sensitive |
| CCCAGATACGGCTGCACGGTACTC  | 0  | 14 | RDR2-sensitive |
| CCCAGATGAGTCGGCGCGAGACGG  | 0  | 10 | RDR2-sensitive |
| CCCAGATGGGTCGGCGCGAGACGG  | 1  | 38 | RDR2-sensitive |
| CCCAGCCAGGAGGTCGATCGGGTC  | 0  | 12 | RDR2-sensitive |
| CCCAGCTGTAGCAATGGGATGGTT  | 0  | 41 | RDR2-sensitive |
| CCCAGGAATCTGCACGCACGTCAT  | 0  | 11 | RDR2-sensitive |
| CCCAGGACTTTGTTGCGGCCCGGA  | 0  | 12 | RDR2-sensitive |
| CCCAGGGCTGAGCAGACGGATAGC  | 0  | 10 | RDR2-sensitive |
| CCCAGTAGTTGACGGGCTCAGGAT  | 0  | 10 | RDR2-sensitive |
| CCCATAGGCAACCGTTCGGACATAA | 0  | 12 | RDR2-sensitive |
| CCCATCGTACGGAGAGAGGCCCCAG | 0  | 19 | RDR2-sensitive |
| CCCATCTGGACTGGGGCACGCGGC  | 0  | 15 | RDR2-sensitive |
| CCCATCTGGGCTGGGACACGCGGC  | 7  | 81 | RDR2-sensitive |
| CCCATCTGGGCTGGGGCACGCAGC  | 5  | 26 | RDR2-sensitive |
| CCCATCTGGGCTGGGGCACGCGGC  | 29 | 67 | RDR2-sensitive |
| CCCATGAGATTCCCGGCTGGACGG  | 0  | 16 | RDR2-sensitive |
| CCCATGGCAGTGTAGGACGGAGTT  | 0  | 17 | RDR2-sensitive |
| CCCATGTTGGATGCTTGGATGGT   | 0  | 16 | RDR2-sensitive |
| CCCATTGCTGTTAGATCGCGG     | 0  | 15 | RDR2-sensitive |
| CCCATTTGCCACGGGGTTGATCGG  | 0  | 13 | RDR2-sensitive |
| CCCATTTTGC GCGGTCTGAGGCAC | 1  | 58 | RDR2-sensitive |
| CCCCAACGGTCGGCTGACGTGGCA  | 0  | 16 | RDR2-sensitive |
| CCCCAACGGTCTGCTGACGTGGCT  | 0  | 20 | RDR2-sensitive |
| CCCCAGTCTAAGGCAGAGGTTTCA  | 0  | 16 | RDR2-sensitive |
| CCCCATCACGGTCTGTACAGATGG  | 1  | 28 | RDR2-sensitive |
| CCCCCAATGGACTCTAAGATGGTA  | 0  | 10 | RDR2-sensitive |
| CCCCCAGATCTAGCGTGTCACTGT  | 3  | 37 | RDR2-sensitive |
| CCCCCATCACTAACGGGTCGGCGT  | 0  | 9  | RDR2-sensitive |
| CCCCCGACGGATAAACGAGGACGG  | 0  | 9  | RDR2-sensitive |
| CCCCCGGCATTGTATTAAGAAGA   | 0  | 10 | RDR2-sensitive |
| CCCCCGTCAGCAGTAGAGACGCAA  | 0  | 14 | RDR2-sensitive |
| CCCCCGTCAGCAGTAGAGGCGCAA  | 1  | 33 | RDR2-sensitive |
| CCCCCGTGCAAGGTCTCGAACGGC  | 3  | 22 | RDR2-sensitive |
| CCCCCTGACACAGCACCGTTGGAT  | 2  | 20 | RDR2-sensitive |
| CCCCCTTGGTACTGTACGCATGGC  | 0  | 13 | RDR2-sensitive |
| CCCCGAATCCCGACGTTAGGCAA   | 0  | 13 | RDR2-sensitive |
| CCCCGATGGCAAACGTAGATGGCA  | 25 | 3  | RDR2-resistant |
| CCCCGCCCTGTTAACTTCCGACGG  | 0  | 14 | RDR2-sensitive |
| CCCCGGAAGACGGCGAACTCCGCT  | 10 | 27 | RDR2-sensitive |
| CCCCGGATCCACTAGAAGACGAAA  | 0  | 11 | RDR2-sensitive |
| CCCCGGATCGTAGGCGCAGAGGCT  | 0  | 10 | RDR2-sensitive |
| CCCCGGCTTGTAGTTGTGCTTAAA  | 0  | 9  | RDR2-sensitive |
| CCCCGGGCTGCATGACGTAGGTGA  | 0  | 10 | RDR2-sensitive |

|                            |    |    |                |
|----------------------------|----|----|----------------|
| CCCCGGGTAGAATGGCGTACACAA   | 0  | 14 | RDR2-sensitive |
| CCCCGGTCCGATGGCAGAACAGGC   | 0  | 9  | RDR2-sensitive |
| CCCCGTCAGCAGTAGAGGCCAAG    | 0  | 9  | RDR2-sensitive |
| CCCCGTGGAGCAGGACATTGGCGT   | 0  | 16 | RDR2-sensitive |
| CCCCTACAGTCGACGGACTTGGCA   | 0  | 14 | RDR2-sensitive |
| CCCCTAGATCTAGCGTGCTACTGT   | 0  | 11 | RDR2-sensitive |
| CCCCTAGCACTGGCGGCACTGAAA   | 2  | 19 | RDR2-sensitive |
| CCCCTAGCCACTGAACGTTAGCAT   | 0  | 11 | RDR2-sensitive |
| CCCCTCGAGGCTGTGGGAGCGCAT   | 0  | 17 | RDR2-sensitive |
| CCCCTCGTGGAAATGTAGCGTTGGC  | 0  | 12 | RDR2-sensitive |
| CCCCTGAGCAGCAGTCGTTGGTG    | 0  | 10 | RDR2-sensitive |
| CCCCTGATCAGTAGGAGGGCTCGG   | 2  | 21 | RDR2-sensitive |
| CCCCTGGAGCTGCTGCATATGGAC   | 20 | 2  | RDR2-resistant |
| CCCCTGGATGAGAAATGAAGGCAC   | 0  | 21 | RDR2-sensitive |
| CCCCTGTAGATCAACGGCTGAAAA   | 0  | 31 | RDR2-sensitive |
| CCCCTGTAGATGGTATGGCTTGAG   | 1  | 22 | RDR2-sensitive |
| CCCCTGTGCTTTGACGTGGGACGG   | 0  | 9  | RDR2-sensitive |
| CCCCTTACGGAAGCAAGAGGACGT   | 1  | 20 | RDR2-sensitive |
| CCCCTTCTTGTCTGCTCGCCTCGGTC | 40 | 5  | RDR2-resistant |
| CCCGAACAGCTTGAGAACGCCATC   | 0  | 35 | RDR2-sensitive |
| CCCGAACCAACAGTAGAACGGTAT   | 0  | 29 | RDR2-sensitive |
| CCCGAACCAACAGTAGAGCAGTAT   | 0  | 10 | RDR2-sensitive |
| CCCGAACTCGCGAGCTGAGACTGT   | 0  | 30 | RDR2-sensitive |
| CCCGAACTGTTGTGTTGGCTTCAT   | 1  | 21 | RDR2-sensitive |
| CCCGAAGCTGACTGTGGATGCGGA   | 0  | 9  | RDR2-sensitive |
| CCCGAATTGTAGTCTGGAGAGGCG   | 56 | 3  | RDR2-resistant |
| CCCGACACGGCACGGTACTGGCAC   | 0  | 16 | RDR2-sensitive |
| CCCGACACGGTAGAATAAGCGGGC   | 1  | 29 | RDR2-sensitive |
| CCCGACCAAGACTCTCCGAAGACA   | 0  | 11 | RDR2-sensitive |
| CCCGACCCAGGGCTCGGACTCGGC   | 0  | 9  | RDR2-sensitive |
| CCCGACGACGACACTACGGACGGT   | 0  | 28 | RDR2-sensitive |
| CCCGACGACTGTACAGATTACGCC   | 0  | 14 | RDR2-sensitive |
| CCCGACGACTGTACAGATTACGTC   | 0  | 13 | RDR2-sensitive |
| CCCGACGACTGTACAGATTGCGCC   | 0  | 17 | RDR2-sensitive |
| CCCGACGACTGTATAGATTGCGTC   | 1  | 24 | RDR2-sensitive |
| CCCGACGGACTGCGCGGGTCACGG   | 0  | 15 | RDR2-sensitive |
| CCCGACTCGTATATTTGACCGCAT   | 0  | 11 | RDR2-sensitive |
| CCCGACTCGTTGACGGCGCCTCGT   | 1  | 12 | RDR2-sensitive |
| CCCGACTGAGACACGAGAGGCGAT   | 1  | 21 | RDR2-sensitive |
| CCCGACTGTAGGCACCTTCGGCAC   | 0  | 9  | RDR2-sensitive |
| CCCGACTTAGGAACCGCCAGTGGA   | 0  | 18 | RDR2-sensitive |
| CCCGACTTGTAGGCGAGAAGTGGT   | 0  | 9  | RDR2-sensitive |
| CCCGACTTTGACTCGACCTGACGG   | 0  | 33 | RDR2-sensitive |
| CCCGAGATACGTAGGAATTGGCCG   | 0  | 17 | RDR2-sensitive |
| CCCGAGGACGATGGGCAGATACGC   | 0  | 9  | RDR2-sensitive |
| CCCGAGGCTTTAGAATAGGGCTGC   | 0  | 12 | RDR2-sensitive |
| CCCGAGGTATCGAAGAGTCGGCAC   | 0  | 18 | RDR2-sensitive |
| CCCGATATATCGGATTGTGCCGGT   | 0  | 10 | RDR2-sensitive |
| CCCGATCCAGAGGACGAGCGGCGT   | 0  | 14 | RDR2-sensitive |

|                          |    |      |                |
|--------------------------|----|------|----------------|
| CCCGATGAGGCGAAGACTGGACGA | 0  | 11   | RDR2-sensitive |
| CCCGATGGCAAACGTAGATGGCAC | 29 | 1    | RDR2-resistant |
| CCCGATGTGGCTAGAAGAATGCAA | 0  | 36   | RDR2-sensitive |
| CCCGCACTGTTAGGAGCCGGCGTA | 0  | 85   | RDR2-sensitive |
| CCCGCCTCGTTGGATTGCTCGGCA | 0  | 11   | RDR2-sensitive |
| CCCGCGAGCGGGCTGCGAGGGCAT | 55 | 0    | RDR2-resistant |
| CCCGCGGACAGTACGAAGCGCGGA | 0  | 9    | RDR2-sensitive |
| CCCGCGGGTGCTGTTGGGAGACGC | 0  | 11   | RDR2-sensitive |
| CCCGCGTAGAACCAGACCGTGCTG | 0  | 16   | RDR2-sensitive |
| CCCGCTTATTCGTGTAGGGCCGGC | 0  | 15   | RDR2-sensitive |
| CCCGGAAGACGGCGAACTCCGCTA | 0  | 10   | RDR2-sensitive |
| CCCGGAAGACGGCGAACTCCGCTC | 81 | 290  | RDR2-sensitive |
| CCCGGAATACAGAGAAGGCTCCAA | 0  | 12   | RDR2-sensitive |
| CCCGGACACGGCACTAAAAAGCAC | 0  | 21   | RDR2-sensitive |
| CCCGGACACGGTCGGACACGGTAC | 0  | 20   | RDR2-sensitive |
| CCCGGACCGCTGGATACGCAGGAT | 0  | 13   | RDR2-sensitive |
| CCCGGACGCCGTGGCGTTGACGTG | 1  | 37   | RDR2-sensitive |
| CCCGGACGGGTGGCTACATGACCT | 0  | 9    | RDR2-sensitive |
| CCCGGACTGGACCAGGCAACCAAA | 0  | 30   | RDR2-sensitive |
| CCCGGAGAGGATTGGAGGGGCTAA | 4  | 17   | RDR2-sensitive |
| CCCGGAGGCAGAACCAGGGGAGGC | 0  | 11   | RDR2-sensitive |
| CCCGGATCCACTAGAAGACGAAAA | 0  | 10   | RDR2-sensitive |
| CCCGGATGCAGGACACACGGTCAC | 0  | 26   | RDR2-sensitive |
| CCCGGATTTAAGGGATAAAGTCGG | 0  | 12   | RDR2-sensitive |
| CCCGGCAAATGTAGCGGCTGAGGA | 1  | 14   | RDR2-sensitive |
| CCCGGCACAGTAGAATAAGCGGAC | 2  | 190  | RDR2-sensitive |
| CCCGGCACAGTAGAATAAGCGGGC | 0  | 16   | RDR2-sensitive |
| CCCGGCACGACTAGCAGGCTGACG | 0  | 34   | RDR2-sensitive |
| CCCGGCACGATAGAATAAGCAGGC | 0  | 41   | RDR2-sensitive |
| CCCGGCACGATAGAATAAGCGGGC | 0  | 19   | RDR2-sensitive |
| CCCGGCACGGCACGGCACTGACAC | 0  | 18   | RDR2-sensitive |
| CCCGGCACGGCAGAATAAGCGGGC | 0  | 13   | RDR2-sensitive |
| CCCGGCACGGGAGAATAAGCGGGC | 2  | 15   | RDR2-sensitive |
| CCCGGCACGGGTACGACTGGGCAC | 0  | 9    | RDR2-sensitive |
| CCCGGCACGGTACGAATAAGCGGG | 2  | 20   | RDR2-sensitive |
| CCCGGCACGGTAGAATAAACGGGC | 6  | 346  | RDR2-sensitive |
| CCCGGCACGGTAGAATAAGCGGAC | 10 | 402  | RDR2-sensitive |
| CCCGGCACGGTAGAATAAGCGGCC | 0  | 13   | RDR2-sensitive |
| CCCGGCACGGTAGAATAAGCGGGA | 0  | 20   | RDR2-sensitive |
| CCCGGCACGGTAGAATAAGCGGGC | 85 | 4716 | RDR2-sensitive |
| CCCGGCACGGTAGAATAAGCGGGG | 2  | 27   | RDR2-sensitive |
| CCCGGCACGGTAGAATAAGCGGGT | 2  | 52   | RDR2-sensitive |
| CCCGGCACGGTAGAATAAGTGGGC | 1  | 19   | RDR2-sensitive |
| CCCGGCACGGTTATTCTTACACGG | 0  | 9    | RDR2-sensitive |
| CCCGGCACTGTTTTTAGGACGGGC | 0  | 32   | RDR2-sensitive |
| CCCGGCATGGTAGAATAAGCGGGC | 2  | 135  | RDR2-sensitive |
| CCCGGCCAGGTTACGTAGACGAGC | 0  | 14   | RDR2-sensitive |
| CCCGGCCCTAAACCACGTCGTCGT | 0  | 9    | RDR2-sensitive |
| CCCGGCGCGGTAGAATAAGCGGGC | 1  | 25   | RDR2-sensitive |

|                          |    |     |                |
|--------------------------|----|-----|----------------|
| CCCGGCTATGGAGAATGCGACGGA | 0  | 9   | RDR2-sensitive |
| CCCGGCTGTATGAGTCAGGTCGGC | 0  | 16  | RDR2-sensitive |
| CCCGGCTGTGTCTGTGGTCGTC   | 1  | 13  | RDR2-sensitive |
| CCCGGCTTTAGTCCCACATCGGCT | 2  | 28  | RDR2-sensitive |
| CCCGGGAGCAGGATGAACGAGCGC | 55 | 10  | RDR2-resistant |
| CCCGGGCACGGCACTAAAAAGCAC | 0  | 20  | RDR2-sensitive |
| CCCGGGCGCGAACATAATCACCAG | 0  | 9   | RDR2-sensitive |
| CCCGGGCTGTGAGAGAAGAGGAAA | 0  | 23  | RDR2-sensitive |
| CCCGGGCTGTGAGAGGAGGGGAAA | 2  | 38  | RDR2-sensitive |
| CCCGGGGAAATACCCGCTCGTCGT | 0  | 11  | RDR2-sensitive |
| CCCGGTACGGTAGAATAAGCGGGC | 0  | 19  | RDR2-sensitive |
| CCCGGTACGGTAGAATAAGTGGGC | 0  | 14  | RDR2-sensitive |
| CCCGGTCCAATGGACTTAGACGGT | 0  | 9   | RDR2-sensitive |
| CCCGGTGCGCAACACGGACGACGG | 0  | 13  | RDR2-sensitive |
| CCCGGTGACCCAGGTCGTCCGAC  | 16 | 0   | RDR2-resistant |
| CCCGGTGCAGGATCTAGAAGACGA | 16 | 200 | RDR2-sensitive |
| CCCGGTGTAGGATCTAGAAGACGA | 0  | 18  | RDR2-sensitive |
| CCCGGTTAGGCACGGCACGAACAG | 1  | 20  | RDR2-sensitive |
| CCCGGTTTTGGACGGTTTTACACG | 15 | 0   | RDR2-resistant |
| CCCGTACAAGGTCTCGAACGGCAA | 0  | 10  | RDR2-sensitive |
| CCCGTACCCATGAACATAGACCGG | 0  | 10  | RDR2-sensitive |
| CCCGTAGAACTCCAGTGGGACTGC | 0  | 12  | RDR2-sensitive |
| CCCGTAGACCAGGAAGAACGGCGT | 1  | 24  | RDR2-sensitive |
| CCCGTAGACTAGGAAGAACGGCGT | 1  | 39  | RDR2-sensitive |
| CCCGTAGATCTCGAGCAAGGCAGA | 0  | 46  | RDR2-sensitive |
| CCCGTATGGACTGTATCCCGGTAT | 0  | 13  | RDR2-sensitive |
| CCCGTCAGCAGTAGAGGCGCAAGA | 3  | 59  | RDR2-sensitive |
| CCCGTCAGCAGTAGAGGCGCGAGA | 1  | 32  | RDR2-sensitive |
| CCCGTCTGACCGAGGCTCGTTGGG | 0  | 135 | RDR2-sensitive |
| CCCGTCTTTCTGTAGGGTGGCCAA | 1  | 43  | RDR2-sensitive |
| CCCGTCTTTCTGTAGGGTGGCCAT | 1  | 70  | RDR2-sensitive |
| CCCGTGACTGGGACAGGCCATGGT | 0  | 18  | RDR2-sensitive |
| CCCGTGCAAGGTCTCGAACGGCAA | 2  | 24  | RDR2-sensitive |
| CCCGTGCAAGGTCTCGAACGGCAC | 0  | 10  | RDR2-sensitive |
| CCCGTGCCTAGCGTCGGATCGGTT | 0  | 9   | RDR2-sensitive |
| CCCGTGGCTATAAGGTCGGATGGT | 0  | 14  | RDR2-sensitive |
| CCCGTGGGCTTGACTTGAGGCATA | 0  | 14  | RDR2-sensitive |
| CCCGTGGGTATAGTCATGGACGGA | 0  | 9   | RDR2-sensitive |
| CCCGTGGGTCTGTTATTGGGCAA  | 8  | 38  | RDR2-sensitive |
| CCCGTGTGCGCACTGTAGGTCGGC | 1  | 28  | RDR2-sensitive |
| CCCGTGTGACTAGACGATCGGCCT | 0  | 11  | RDR2-sensitive |
| CCCGTTCTGTAGCGGGTGAGACGT | 0  | 55  | RDR2-sensitive |
| CCCGTTCTGTATGTCTGATAGGC  | 0  | 12  | RDR2-sensitive |
| CCCGTTGAGCAACTCTGTGAGGCA | 0  | 9   | RDR2-sensitive |
| CCCGTTGCACGTCTGTAGATGGCC | 0  | 10  | RDR2-sensitive |
| CCCGTTGGGCTAGCACGACACGGC | 0  | 10  | RDR2-sensitive |
| CCCGTTGGGCTAGCCCGAGCACGG | 0  | 19  | RDR2-sensitive |
| CCCGTTGGGCTGACCCAAGCACGG | 0  | 11  | RDR2-sensitive |
| CCCGTTGTATTGGTCGGATCGGAT | 1  | 35  | RDR2-sensitive |



|                           |    |      |                |
|---------------------------|----|------|----------------|
| CCCGTTTAACTGTGGGCGTGCGGT  | 0  | 27   | RDR2-sensitive |
| CCCGTTTGACCCGTGATCCGGCAC  | 1  | 54   | RDR2-sensitive |
| CCCGTTTGGCACGAAGCACGATGG  | 0  | 34   | RDR2-sensitive |
| CCCGTTTGGCCTGTGGCACGGCAC  | 0  | 26   | RDR2-sensitive |
| CCCTAACTGTACAGGTGTGAGCGT  | 0  | 31   | RDR2-sensitive |
| CCCTAATCTGAACGTGATGGCTTT  | 0  | 9    | RDR2-sensitive |
| CCCTAATGAGTCGGGCGTCCGGAC  | 0  | 15   | RDR2-sensitive |
| CCCTACAGACTAGACAGAGGACGA  | 0  | 12   | RDR2-sensitive |
| CCCTACCGTCAGCAGTAGAGGCGC  | 0  | 11   | RDR2-sensitive |
| CCCTAGCACTGGCGGAAGTGAAGAA | 0  | 28   | RDR2-sensitive |
| CCCTAGCACTGGCGGCACTGAAAA  | 4  | 32   | RDR2-sensitive |
| CCCTAGTACTGGCGGCACTGAAAA  | 0  | 9    | RDR2-sensitive |
| CCCTCAAAGGCGTAGGAAGAGCAT  | 0  | 10   | RDR2-sensitive |
| CCCTCACGCGGCAGATGTAAACAG  | 0  | 12   | RDR2-sensitive |
| CCCTCAGATCTAGCGTGTCACTGT  | 0  | 9    | RDR2-sensitive |
| CCCTCCACGCGGCGGACTCGGTGT  | 0  | 12   | RDR2-sensitive |
| CCCTCCCGTCAACAGTAGAGGCGC  | 1  | 25   | RDR2-sensitive |
| CCCTCCCGTCAGCAGTAGAGACGC  | 6  | 162  | RDR2-sensitive |
| CCCTCCCGTCAGCAGTAGAGGCAC  | 4  | 36   | RDR2-sensitive |
| CCCTCCCGTCAGCAGTAGAGGCGA  | 2  | 16   | RDR2-sensitive |
| CCCTCCCGTCAGCAGTAGAGGCGC  | 84 | 1166 | RDR2-sensitive |
| CCCTCCCGTCAGCAGTAGAGGCGT  | 7  | 196  | RDR2-sensitive |
| CCCTCCCGTCAGCAGTAGATGCGC  | 0  | 12   | RDR2-sensitive |
| CCCTCCCGTCAGGAGTAGAGGCGT  | 0  | 14   | RDR2-sensitive |
| CCCTCCCGTCAGTAGTAGAGGCGC  | 1  | 17   | RDR2-sensitive |
| CCCTCCCGTTAGCAGTAGAGACGC  | 0  | 19   | RDR2-sensitive |
| CCCTCGAACGGTCGCCGGGAAGAA  | 8  | 26   | RDR2-sensitive |
| CCCTCGCTCGGCGTCTGAGGCGAC  | 1  | 14   | RDR2-sensitive |
| CCCTCGGGTTGTGTGCGCGGCTAT  | 0  | 11   | RDR2-sensitive |
| CCCTCGGGTTTCGTGCATGCTCAC  | 0  | 19   | RDR2-sensitive |
| CCCTCGGTTTCTGTGCGCGGCTGT  | 0  | 17   | RDR2-sensitive |
| CCCTCGTACATCGTCAGTCATCAG  | 0  | 9    | RDR2-sensitive |
| CCCTCGTGCAAGGTCTCGAACGGC  | 3  | 25   | RDR2-sensitive |
| CCCTCTAGCCTGGATTGTACGGAC  | 0  | 13   | RDR2-sensitive |
| CCCTCTCGTCAGCAGTAGAGGCGC  | 2  | 29   | RDR2-sensitive |
| CCCTCTCGTCAGCGGATTAGGCGT  | 0  | 10   | RDR2-sensitive |
| CCCTCTCTGCGACGGTGTGGACGG  | 0  | 10   | RDR2-sensitive |
| CCCTCTGAGGCTCTGACCGAGGAC  | 2  | 43   | RDR2-sensitive |
| CCCTCTGCGACGGTGTGGACGGTC  | 0  | 11   | RDR2-sensitive |
| CCCTCTGGTCAGGCGCGGACGGTC  | 0  | 13   | RDR2-sensitive |
| CCCTCTGTAAGCTGAATGCGTCCA  | 0  | 9    | RDR2-sensitive |
| CCCTCTGTTTGGAGACTGGCTGAT  | 0  | 12   | RDR2-sensitive |
| CCCTGAACTCGGCTCGAACGGCGA  | 15 | 0    | RDR2-resistant |
| CCCTGACATCGTCGGCGATGCGGT  | 0  | 15   | RDR2-sensitive |
| CCCTGACCCGAGTAGAGAGGAGGA  | 18 | 0    | RDR2-resistant |
| CCCTGACGATACTCTTGTGAAGA   | 16 | 0    | RDR2-resistant |
| CCCTGACGGCACTCTAGTTGAAGA  | 66 | 18   | RDR2-resistant |
| CCCTGACTGTTTTGTCTCCGTCGG  | 0  | 14   | RDR2-sensitive |
| CCCTGAGATCGGACGGTCCGCGGT  | 0  | 12   | RDR2-sensitive |

|                            |     |     |                |
|----------------------------|-----|-----|----------------|
| CCCTGAGCGGCGGGCTGTTGCGGG   | 0   | 9   | RDR2-sensitive |
| CCCTGAGCTGAGCATGAGGATTGT   | 0   | 10  | RDR2-sensitive |
| CCCTGAGGTCGGATGGTCCACGGT   | 1   | 23  | RDR2-sensitive |
| CCCTGAGTCCGGACGGTCCGCGGT   | 0   | 9   | RDR2-sensitive |
| CCCTGATCAGTAGGAGGGCTCGGG   | 0   | 10  | RDR2-sensitive |
| CCCTGATTCTAGGAACGGAGCCGC   | 0   | 9   | RDR2-sensitive |
| CCCTGATTGTAGAAACGGAGCCGC   | 0   | 14  | RDR2-sensitive |
| CCCTGCGATACGGTCGGTCGTCGT   | 0   | 12  | RDR2-sensitive |
| CCCTGCGATTCCGGTCGGTTGGCGT  | 0   | 11  | RDR2-sensitive |
| CCCTGCGATTTGGTCGGTCGGCGT   | 0   | 29  | RDR2-sensitive |
| CCCTGCGATTTGGTCGGTTGGCGT   | 5   | 64  | RDR2-sensitive |
| CCCTGCGGTCTGGAGCGGTGACAG   | 0   | 11  | RDR2-sensitive |
| CCCTGCGTAGGATGAGACGAGCCT   | 0   | 10  | RDR2-sensitive |
| CCCTGGACCGACGAGTGAGATTGT   | 0   | 11  | RDR2-sensitive |
| CCCTGGACTTGTGGAGTACGCCGG   | 1   | 12  | RDR2-sensitive |
| CCCTGGAGGATGAGGTTCGAGGACT  | 19  | 0   | RDR2-resistant |
| CCCTGGATGTAGTTGGTAGACGGT   | 1   | 34  | RDR2-sensitive |
| CCCTGGTCTGGCGCACCGGACTGT   | 4   | 18  | RDR2-sensitive |
| CCCTGTACCTAGCTGCTGCCAGC    | 26  | 2   | RDR2-resistant |
| CCCTGTACGTGTGGATACCTCGGA   | 12  | 58  | RDR2-sensitive |
| CCCTGTAGAAGCACAGCTGGCGGT   | 4   | 27  | RDR2-sensitive |
| CCCTGTAGAAGCACAGCTGTCCGGT  | 0   | 18  | RDR2-sensitive |
| CCCTGTAGAAGCATAGCTGGCGGT   | 1   | 14  | RDR2-sensitive |
| CCCTGTAGAAGCGCAGCTGGCGGT   | 0   | 9   | RDR2-sensitive |
| CCCTGTAGAAGCGTAGCTGGCGGT   | 2   | 41  | RDR2-sensitive |
| CCCTGTAGAGTGAGGATTTGGGTG   | 0   | 10  | RDR2-sensitive |
| CCCTGTAGATCAACGGCTGAAAAT   | 0   | 18  | RDR2-sensitive |
| CCCTGTAGATCAACGGCTGAAGAT   | 0   | 9   | RDR2-sensitive |
| CCCTGTATACTGGACGGTCCGCAG   | 1   | 17  | RDR2-sensitive |
| CCCTGTGCGCTACTTTGATGGGCT   | 0   | 10  | RDR2-sensitive |
| CCCTTACACTGGATTGTTCCGATA   | 0   | 10  | RDR2-sensitive |
| CCCTTATTGGTTGGGCTAAGGTAT   | 0   | 24  | RDR2-sensitive |
| CCCTTCCCTCCCGTCAGCAGTAGA   | 1   | 16  | RDR2-sensitive |
| CCCTTCCGTCAACAGTAGAGGCCGC  | 0   | 13  | RDR2-sensitive |
| CCCTTCCGTCAAGCAGTAGAGGCCGC | 10  | 178 | RDR2-sensitive |
| CCCTTCCGTCAAGCAGTAGAGGCCGT | 2   | 26  | RDR2-sensitive |
| CCCTTCCGTCAAGGAGTAGAGGCCGC | 0   | 10  | RDR2-sensitive |
| CCCTTCGTTCTTAGGCTCAGCGGC   | 155 | 14  | RDR2-resistant |
| CCCTTCTACTGTAGCTATGTGCAT   | 0   | 20  | RDR2-sensitive |
| CCCTTGCATGTCGGCTGTAGGGGC   | 0   | 12  | RDR2-sensitive |
| CCGAAACCGTAGAGAGGGCCACCG   | 19  | 1   | RDR2-resistant |
| CCGAAATCGGACGGGAACCGGTAT   | 0   | 10  | RDR2-sensitive |
| CCGAACAGCTCGGACGGAGTCCAA   | 0   | 9   | RDR2-sensitive |
| CCGAACCGAACCCGAATAGACCGA   | 1   | 30  | RDR2-sensitive |
| CCGAACCGAACGCAGCTGTAGCAT   | 0   | 19  | RDR2-sensitive |
| CCGAACCGCCTGTGGAGACGACAC   | 0   | 12  | RDR2-sensitive |
| CCGAACCGGAAGCACTGAGACGAA   | 0   | 11  | RDR2-sensitive |
| CCGAACCGTATTGGACCTTGGCAT   | 0   | 86  | RDR2-sensitive |
| CCGAACGGGCGTAGGAACAGCGGA   | 0   | 12  | RDR2-sensitive |

|                           |    |    |                |
|---------------------------|----|----|----------------|
| CCGAACGGTCTGCGGTAGTAACGC  | 0  | 9  | RDR2-sensitive |
| CCGAACCTCGGCACGGTCTGGTTAT | 0  | 9  | RDR2-sensitive |
| CCGAAGACTGGAAGTAGGGACGTT  | 0  | 10 | RDR2-sensitive |
| CCGAAGACTGGAGCGAGCAGGGCA  | 0  | 16 | RDR2-sensitive |
| CCGAAGATGTACGATGATGAGGAG  | 22 | 1  | RDR2-resistant |
| CCGAAGCGGACTGACGGTGTAGAT  | 0  | 9  | RDR2-sensitive |
| CCGAAGCTGTAGTATCCGGGGCAT  | 3  | 75 | RDR2-sensitive |
| CCGAAGGACCTGCCGGCTTGACGG  | 0  | 38 | RDR2-sensitive |
| CCGAAGGACCTGTGAGACGACCAG  | 0  | 11 | RDR2-sensitive |
| CCGAAGTCTGTAGGCAGCGGCGAC  | 0  | 28 | RDR2-sensitive |
| CCGAATAGCGGACGCTCGGAAGTC  | 0  | 12 | RDR2-sensitive |
| CCGAATCCCTGGGCACGCGTCGGC  | 0  | 16 | RDR2-sensitive |
| CCGAATGGAGCTGGCAGACGACGT  | 0  | 16 | RDR2-sensitive |
| CCGAATGGGCTGTCTGATAGGCTT  | 1  | 50 | RDR2-sensitive |
| CCGACAAAAGGCACTCGGCAAAGA  | 0  | 37 | RDR2-sensitive |
| CCGACAAGCAGCTCTGCATCTCGT  | 0  | 21 | RDR2-sensitive |
| CCGACACAAGTAGCAGGCTGACAG  | 0  | 11 | RDR2-sensitive |
| CCGACACGACTAGCAGGCTGATGG  | 0  | 18 | RDR2-sensitive |
| CCGACACGGTCTGGTTTTATGCGG  | 0  | 9  | RDR2-sensitive |
| CCGACACGGTTAATTGGTAGGCAC  | 0  | 11 | RDR2-sensitive |
| CCGACACGTAGAGGGCGCTGTAGG  | 0  | 14 | RDR2-sensitive |
| CCGACACGTAGGAGGCGCTGTAGG  | 0  | 28 | RDR2-sensitive |
| CCGACAGCCTGGATGGACGCGCGT  | 0  | 14 | RDR2-sensitive |
| CCGACATCGGGCGACGGATCCGGC  | 0  | 9  | RDR2-sensitive |
| CCGACCAAGACTCTCCGAAGACAA  | 0  | 9  | RDR2-sensitive |
| CCGACCAGGTGCTCTGACCGGCGC  | 0  | 38 | RDR2-sensitive |
| CCGACCATGGACGAGCAGAACGCC  | 0  | 9  | RDR2-sensitive |
| CCGACCCAGGGCTCGGACTCGGCC  | 0  | 12 | RDR2-sensitive |
| CCGACCCAGGGGCTCGGACTCGGC  | 61 | 6  | RDR2-resistant |
| CCGACCCGGGCTGTCCGCACGGAGC | 0  | 14 | RDR2-sensitive |
| CCGACCGTTGCAGATCTGGCGCAC  | 1  | 13 | RDR2-sensitive |
| CCGACCGTTGGCTCACCGGACAGT  | 2  | 18 | RDR2-sensitive |
| CCGACCTAGACTCCTCCAATCGGC  | 0  | 10 | RDR2-sensitive |
| CCGACGACGTGTGGTAGAAGGGGC  | 0  | 9  | RDR2-sensitive |
| CCGACGACTGTACAGATTACGCCA  | 0  | 28 | RDR2-sensitive |
| CCGACGACTGTACAGATTGCGCCA  | 0  | 18 | RDR2-sensitive |
| CCGACGACTGTACAGATTGCGCTA  | 0  | 9  | RDR2-sensitive |
| CCGACGACTGTACATATTACGCCA  | 0  | 13 | RDR2-sensitive |
| CCGACGACTGTATAGATTGCGTCA  | 0  | 9  | RDR2-sensitive |
| CCGACGACTGTTTAGGAAGCCGTC  | 0  | 15 | RDR2-sensitive |
| CCGACGAGACTGGGTGCGGTTTCAG | 0  | 13 | RDR2-sensitive |
| CCGACGCCTGGTGGACGGAACGGC  | 2  | 15 | RDR2-sensitive |
| CCGACGCGACTGACGGATAAGCCA  | 0  | 12 | RDR2-sensitive |
| CCGACGGAACGAACAAGGCCTAA   | 0  | 9  | RDR2-sensitive |
| CCGACGGATGACGGATAACAAGCGT | 0  | 23 | RDR2-sensitive |
| CCGACGGCTGCAATTTAGACGGT   | 0  | 9  | RDR2-sensitive |
| CCGACGGCTTAAGACGGGTCCCGT  | 0  | 24 | RDR2-sensitive |
| CCGACGGGCACTCGATAAAGATGG  | 0  | 10 | RDR2-sensitive |
| CCGACGGGCTAACTTACGACGGTT  | 3  | 17 | RDR2-sensitive |

|                           |    |    |                |
|---------------------------|----|----|----------------|
| CCGACGGGCTGGAAATTGAGGCAT  | 0  | 9  | RDR2-sensitive |
| CCGACGTGACAGCGCATATGACAA  | 0  | 14 | RDR2-sensitive |
| CCGACGTGGAACCGAGCTCGGCCG  | 0  | 10 | RDR2-sensitive |
| CCGACTAGTAGTGGTTAACGGCCA  | 0  | 9  | RDR2-sensitive |
| CCGACTCAGAACTGGTACGGACAA  | 14 | 38 | RDR2-sensitive |
| CCGACTCGGCCTGAAGCACGGTAG  | 0  | 19 | RDR2-sensitive |
| CCGACTGAAACACGTGGGTCTCGT  | 0  | 21 | RDR2-sensitive |
| CCGACTGCCGACGCTACACACTGA  | 0  | 9  | RDR2-sensitive |
| CCGACTGCGGCTGCGGCTTCTACA  | 0  | 12 | RDR2-sensitive |
| CCGACTGTTGATCCAAGGGCGCCT  | 0  | 16 | RDR2-sensitive |
| CCGACTGTTTGGTTACGCGGCCGA  | 0  | 27 | RDR2-sensitive |
| CCGACTTTGACTCGACCTGACGGT  | 0  | 13 | RDR2-sensitive |
| CCGAGACGGCGTCAGATTCTCCTT  | 0  | 15 | RDR2-sensitive |
| CCGAGACGGTAGGAAAACGGACTG  | 0  | 10 | RDR2-sensitive |
| CCGAGACTGCATGCGTGGACGTGA  | 0  | 16 | RDR2-sensitive |
| CCGAGAGCGCTGGAGAGAACGGAT  | 0  | 10 | RDR2-sensitive |
| CCGAGAGCTTGGCCCTCGCGTCGG  | 0  | 10 | RDR2-sensitive |
| CCGAGAGGACTAGGGTTTCAGCGG  | 0  | 19 | RDR2-sensitive |
| CCGAGATACGTAGGAATTGGCCGT  | 0  | 20 | RDR2-sensitive |
| CCGAGATACGTAGGAATTGGTCGT  | 1  | 44 | RDR2-sensitive |
| CCGAGATCGGACGGCTTGGATGGC  | 25 | 0  | RDR2-resistant |
| CCGAGATCTCAGGACCGGCCCTAG  | 0  | 12 | RDR2-sensitive |
| CCGAGCAACTCTGCGAGACGGACT  | 0  | 9  | RDR2-sensitive |
| CCGAGCACGGCACGGTAGAGGCC   | 0  | 9  | RDR2-sensitive |
| CCGAGCCGCTGTAGGGTGTAGCAT  | 0  | 9  | RDR2-sensitive |
| CCGAGCCGCTGTAGGTTGTCGCGT  | 1  | 14 | RDR2-sensitive |
| CCGAGCGCGTGGAACCTGACGGCAC | 1  | 14 | RDR2-sensitive |
| CCGAGCTACCTGCCGCGCTGTCGT  | 0  | 10 | RDR2-sensitive |
| CCGAGCTCCTGCACCAGGTCGCGG  | 0  | 28 | RDR2-sensitive |
| CCGAGCTCGGTACCACGTCGGCGC  | 1  | 12 | RDR2-sensitive |
| CCGAGCTCGGTGCCACGTCGACGC  | 0  | 14 | RDR2-sensitive |
| CCGAGCTCGGTGCCACGTCGGCGC  | 0  | 9  | RDR2-sensitive |
| CCGAGCTGACCATGAAACGAGCGA  | 0  | 11 | RDR2-sensitive |
| CCGAGCTGACCATGAAACGAGCGA  | 0  | 9  | RDR2-sensitive |
| CCGAGCTGACCCTGAAACGAGCGA  | 0  | 15 | RDR2-sensitive |
| CCGAGCTTGGACTGCGGCGTAGGC  | 0  | 13 | RDR2-sensitive |
| CCGAGGAATAACAGCGTAGACGGT  | 0  | 48 | RDR2-sensitive |
| CCGAGGACGCGCTGCTGACGGTGT  | 0  | 13 | RDR2-sensitive |
| CCGAGGATAGACTCAGGCAAGGCG  | 0  | 9  | RDR2-sensitive |
| CCGAGGGACCGTTTTGAGAGAGGGA | 21 | 2  | RDR2-resistant |
| CCGAGGGACCTGCCGGCTTGACGG  | 1  | 16 | RDR2-sensitive |
| CCGAGGGACTCCACGCAAAGACGT  | 5  | 35 | RDR2-sensitive |
| CCGAGGGACTCCACGCGAAGACGT  | 2  | 25 | RDR2-sensitive |
| CCGAGGGACTGACGGGTTATTCCT  | 10 | 28 | RDR2-sensitive |
| CCGAGGTACGTGCTACGCTGGCAC  | 4  | 21 | RDR2-sensitive |
| CCGAGGTACGTGCTACGCTGGCGC  | 0  | 9  | RDR2-sensitive |
| CCGAGGTACGTGCTGCGCTGGCAC  | 0  | 14 | RDR2-sensitive |
| CCGAGGTACGTGCTGCGTTGGCAC  | 0  | 9  | RDR2-sensitive |
| CCGAGTCGCTGTATGGTTGGTGA   | 0  | 9  | RDR2-sensitive |

|                          |     |     |                |
|--------------------------|-----|-----|----------------|
| CCGAGTGGCTAGGACTGGGCGGAC | 0   | 9   | RDR2-sensitive |
| CCGATACCAGCTGTGACGGAACCT | 0   | 20  | RDR2-sensitive |
| CCGATCAGTGACGTGGACACGGTT | 149 | 0   | RDR2-resistant |
| CCGATCCGGGCGGAAGACATTGTC | 29  | 5   | RDR2-resistant |
| CCGATCCGGTGGTCTCGACAGCGT | 0   | 21  | RDR2-sensitive |
| CCGATCGAAGTTGTGGGCGAGGCT | 0   | 19  | RDR2-sensitive |
| CCGATCGGCAAGCGGGAGGACCAT | 1   | 12  | RDR2-sensitive |
| CCGATCTGAACCCGGTGAGCACAG | 0   | 10  | RDR2-sensitive |
| CCGATGACTGGAAGTAGGGACGTT | 0   | 24  | RDR2-sensitive |
| CCGATGACTGGGCACACGTGCTGA | 0   | 10  | RDR2-sensitive |
| CCGATGACTGGGCACACGTGCTGG | 1   | 16  | RDR2-sensitive |
| CCGATGATTCGTGGAACGGGCAT  | 9   | 44  | RDR2-sensitive |
| CCGATGCCCTACTGTAGACGGTCA | 0   | 20  | RDR2-sensitive |
| CCGATGCTGCGATCCTGAAGACGG | 0   | 12  | RDR2-sensitive |
| CCGATGGACACGGGTACAATTCCT | 0   | 9   | RDR2-sensitive |
| CCGATGGACCGCAGCGGGAGAGGA | 23  | 0   | RDR2-resistant |
| CCGATGGGACGCACGCTGGTACGG | 0   | 12  | RDR2-sensitive |
| CCGATGGGTACTCTGACGGGTCGT | 0   | 24  | RDR2-sensitive |
| CCGATGTGGGACTAAAGCCGGGGC | 1   | 12  | RDR2-sensitive |
| CCGATTATCCGTCCGGCCTAACGG | 0   | 9   | RDR2-sensitive |
| CCGATTATGTGTCCGGCCTGACGG | 0   | 14  | RDR2-sensitive |
| CCGATTCGGCTGTAGCGAAGATGC | 0   | 9   | RDR2-sensitive |
| CCGATTGATGAACCGGAAGCGCGG | 0   | 9   | RDR2-sensitive |
| CCGCAAGAGTGGCATGATCCTGAC | 0   | 13  | RDR2-sensitive |
| CCGCAATCTGGGCGCAAGAACGGC | 0   | 10  | RDR2-sensitive |
| CCGCACAAGCACGGACAGATCCAT | 0   | 12  | RDR2-sensitive |
| CCGCACCTGTGGTATGGACGGTCC | 0   | 19  | RDR2-sensitive |
| CCGCACTCGGCGACTGCACGGCGA | 0   | 12  | RDR2-sensitive |
| CCGCAGATGTAGACATTGTGGCAC | 0   | 11  | RDR2-sensitive |
| CCGCAGCCGGATTGCAGCCGCAGC | 0   | 17  | RDR2-sensitive |
| CCGCAGCGCACGGTGGTCTGGGTG | 21  | 1   | RDR2-resistant |
| CCGCAGCTCTGAGCCAGACGGTCC | 0   | 18  | RDR2-sensitive |
| CCGCAGTATACGGTAGGACGGTTT | 0   | 11  | RDR2-sensitive |
| CCGCATACCGGACAGATGACGCAG | 0   | 11  | RDR2-sensitive |
| CCGCATAGAACCGGACTGGGTCGG | 0   | 9   | RDR2-sensitive |
| CCGCATCATTGATTTTGTCTCGT  | 0   | 9   | RDR2-sensitive |
| CCGCATCTGAGGCTCGGACGGTCT | 0   | 16  | RDR2-sensitive |
| CCGCATGCGTCTGGCCTGTGACGG | 0   | 16  | RDR2-sensitive |
| CCGCATTTTGCACGGTCTGAGGCA | 0   | 19  | RDR2-sensitive |
| CCGCCACTGTGCAGAATTGCGGAC | 0   | 12  | RDR2-sensitive |
| CCGCCCTGTAGATCAACGGCTGA  | 2   | 324 | RDR2-sensitive |
| CCGCCCTGGGGAACGACGACGGTA | 0   | 38  | RDR2-sensitive |
| CCGCCGATGATGTAGGGACGTTGT | 0   | 13  | RDR2-sensitive |
| CCGCCGCGGCTTAGACACGACGTG | 0   | 19  | RDR2-sensitive |
| CCGCCTCGTTGGATTGCTCGGCAG | 0   | 13  | RDR2-sensitive |
| CCGCGACACAGAGCCGGACGGTCC | 0   | 12  | RDR2-sensitive |
| CCGCGACCTGGATGCAAGAATGGC | 0   | 19  | RDR2-sensitive |
| CCGCGACCTGGCGCAGAAGCTGAC | 0   | 18  | RDR2-sensitive |
| CCGCGACCTGGTACAGAGGCTGGC | 0   | 9   | RDR2-sensitive |

|                           |    |    |                |
|---------------------------|----|----|----------------|
| CCGCGACCTGGTGCAGGAGCTCGG  | 3  | 92 | RDR2-sensitive |
| CCGCGACTGCTTCATGATCTACGG  | 5  | 20 | RDR2-sensitive |
| CCGCGACTGTGCAGAGACCACCGC  | 0  | 9  | RDR2-sensitive |
| CCGCGAGACCAGCACGAAGCCCGC  | 0  | 9  | RDR2-sensitive |
| CCGCGAGCGGGCTGCGAGGGCATA  | 24 | 0  | RDR2-resistant |
| CCGCGCATGTGTAGGGACGACGAA  | 0  | 12 | RDR2-sensitive |
| CCGCGCCTGACCAGAGAGCACCGC  | 1  | 42 | RDR2-sensitive |
| CCGCGCCTGTAGATCAACGGCTGA  | 2  | 86 | RDR2-sensitive |
| CCGCGCCTGTAGGCCGGACGGTCC  | 1  | 18 | RDR2-sensitive |
| CCGCGCCTGTGGCTCAGACGGTAC  | 0  | 10 | RDR2-sensitive |
| CCGCGCCTGTGGGCTGGACGGTCC  | 0  | 9  | RDR2-sensitive |
| CCGCGCGCTGTAGAAGGCACCGTC  | 0  | 28 | RDR2-sensitive |
| CCGCGCGGGCGTTTTTATAGGCAT  | 0  | 13 | RDR2-sensitive |
| CCGCGCGTGAACAATGATGGCTGA  | 0  | 12 | RDR2-sensitive |
| CCGCGCGTGCGTAGAGACGGTGAA  | 0  | 27 | RDR2-sensitive |
| CCGCGCTCTGGAACCTGACGGTCTG | 0  | 17 | RDR2-sensitive |
| CCGCGGACGGTAAAACACGGACGG  | 0  | 13 | RDR2-sensitive |
| CCGCGGACGTTAGAGAATCGCGGC  | 1  | 15 | RDR2-sensitive |
| CCGCGGAGACATCGGAACACGGCT  | 0  | 9  | RDR2-sensitive |
| CCGCGGCACAGGGTCGGACGGTCC  | 0  | 19 | RDR2-sensitive |
| CCGCGGCTCTAGGTCGGACGGTCC  | 0  | 14 | RDR2-sensitive |
| CCGCGGCTGGAACCTGGAAGCGGA  | 0  | 37 | RDR2-sensitive |
| CCGCGGTATAGACCGGACGGTCT   | 0  | 24 | RDR2-sensitive |
| CCGCGGTATAGGGCTGTACGGGGT  | 0  | 13 | RDR2-sensitive |
| CCGCGGTCCGGACTGTCCACGGTG  | 0  | 9  | RDR2-sensitive |
| CCGCGGTCTGAGTGCAGGAGCGAC  | 0  | 34 | RDR2-sensitive |
| CCGCGTCAAGAAGAAGTCCCAGGA  | 1  | 12 | RDR2-sensitive |
| CCGCGTCTGTGGGCCGGACGGTCC  | 0  | 9  | RDR2-sensitive |
| CCGCGTGCATCTAGCCCGTGTCCG  | 0  | 19 | RDR2-sensitive |
| CCGCGTGCTGGGCTTGGACGCCAT  | 0  | 31 | RDR2-sensitive |
| CCGCGTGTAGATCATTGTGGCGTA  | 0  | 29 | RDR2-sensitive |
| CCGCGTTGGACAAAGGGCTGCGGC  | 0  | 11 | RDR2-sensitive |
| CCGCTAGATCGACGATGGACGGGT  | 24 | 0  | RDR2-resistant |
| CCGCTAGTACTGTAGCACCGGTAG  | 0  | 19 | RDR2-sensitive |
| CCGCTAGTCCTAGACTGTCTCGGC  | 1  | 15 | RDR2-sensitive |
| CCGCTCCGCCTGTAGAGATGGCAA  | 0  | 23 | RDR2-sensitive |
| CCGCTCGACTCGTGGAAACCGGCC  | 1  | 13 | RDR2-sensitive |
| CCGCTCGGCTGAACGTGATGGCGT  | 0  | 28 | RDR2-sensitive |
| CCGCTCTCGCCTGCCTATCGCCGG  | 0  | 11 | RDR2-sensitive |
| CCGCTCTGACCGCCCAGATGGCAA  | 0  | 9  | RDR2-sensitive |
| CCGCTCTGAGCCAAACCGAGACGC  | 0  | 13 | RDR2-sensitive |
| CCGCTCTGGATTAGCATGGATTGG  | 0  | 22 | RDR2-sensitive |
| CCGCTCTGGCCTCTGGACGCGGT   | 0  | 18 | RDR2-sensitive |
| CCGCTCTGTGTGCCCGTACGACAT  | 18 | 0  | RDR2-resistant |
| CCGCTGAAGACTGAATGTAGGGAC  | 0  | 22 | RDR2-sensitive |
| CCGCTGAGAACACGGGACAGACGC  | 1  | 28 | RDR2-sensitive |
| CCGCTGAGTCTGTATACACGAGTG  | 0  | 11 | RDR2-sensitive |
| CCGCTGCGACTAGTCTGAGGACGC  | 0  | 11 | RDR2-sensitive |
| CCGCTGCTCTGCGCGTCTAGTGGT  | 36 | 2  | RDR2-resistant |

|                           |    |     |                |
|---------------------------|----|-----|----------------|
| CCGCTGCTGGATCTCGACACGCGT  | 0  | 15  | RDR2-sensitive |
| CCGCTGTAGACAGAAGATGGGCGA  | 0  | 16  | RDR2-sensitive |
| CCGCTTATTCGTGCCGGGCTCGGA  | 0  | 11  | RDR2-sensitive |
| CCGCTTATTCGTGTAGGGCCGGCC  | 0  | 43  | RDR2-sensitive |
| CCGCTTATTCGTGTCTGGGCCGGCC | 2  | 27  | RDR2-sensitive |
| CCGCTTATTCGTGTCTGGGCCGGTC | 0  | 20  | RDR2-sensitive |
| CCGCTTTCGGACCGTGCTAGCATG  | 0  | 12  | RDR2-sensitive |
| CCGGAACAAGGTCTGGAATGGGCT  | 0  | 15  | RDR2-sensitive |
| CCGGAACCTTGCATGCGTATGCAT  | 0  | 12  | RDR2-sensitive |
| CCGGAACGATGCAAAGCAGCACAG  | 0  | 9   | RDR2-sensitive |
| CCGGAAGACGGCGAACTCCGCTCC  | 11 | 474 | RDR2-sensitive |
| CCGGAAGGAGGTAGAGCTGTACGG  | 0  | 13  | RDR2-sensitive |
| CCGGAATTGCTCGCTGAAGTTCGG  | 0  | 9   | RDR2-sensitive |
| CCGGACACTTGAGGGCATAAACGT  | 0  | 17  | RDR2-sensitive |
| CCGGACAGTCCGCGGTGGTGGCGC  | 2  | 18  | RDR2-sensitive |
| CCGGACAGTCCGGTGAATTATAGC  | 2  | 19  | RDR2-sensitive |
| CCGGACAGTCCGGTGCACCATCGG  | 0  | 14  | RDR2-sensitive |
| CCGGACAGTCCGGTGCGCCAGCCA  | 0  | 13  | RDR2-sensitive |
| CCGGACAGTGAACAGTAACGGATC  | 0  | 13  | RDR2-sensitive |
| CCGGACATGAAACGAGGTACGGTT  | 0  | 11  | RDR2-sensitive |
| CCGGACCAGCCTACTCAAGCACGG  | 0  | 24  | RDR2-sensitive |
| CCGGACCCGCATAGAACCAGGCCG  | 0  | 16  | RDR2-sensitive |
| CCGGACCCGCATAGAACCGGGCTG  | 0  | 11  | RDR2-sensitive |
| CCGGACCCTGACAGAGAATTGCAC  | 32 | 4   | RDR2-resistant |
| CCGGACCGAGCACGCAGAGACGAT  | 0  | 13  | RDR2-sensitive |
| CCGGACGATCTACGATGGCGATGG  | 1  | 14  | RDR2-sensitive |
| CCGGACGCAGTCTGCACGCGCGGA  | 0  | 12  | RDR2-sensitive |
| CCGGACGGTATGCGAGGTAGGCGC  | 0  | 21  | RDR2-sensitive |
| CCGGACGGTCTGCGGTGGTGGCAC  | 1  | 27  | RDR2-sensitive |
| CCGGACGTACACAGGAGGAGCCGC  | 0  | 11  | RDR2-sensitive |
| CCGGACGTGGGCGGCGGAATTGGT  | 2  | 20  | RDR2-sensitive |
| CCGGACGTTGGGCACGATAGACGC  | 0  | 9   | RDR2-sensitive |
| CCGGACTCTGTAGGGTGTGCACGG  | 0  | 20  | RDR2-sensitive |
| CCGGACTGGACCAGGCAACCAAAC  | 0  | 9   | RDR2-sensitive |
| CCGGACTGGGTGTTGGCCATGCAG  | 0  | 11  | RDR2-sensitive |
| CCGGACTGTCCGCGGTGGTGGCGC  | 10 | 48  | RDR2-sensitive |
| CCGGACTGTCCGGTGTAGCCAACGG | 3  | 20  | RDR2-sensitive |
| CCGGACTGTCCGGTGTGCCATCGA  | 8  | 67  | RDR2-sensitive |
| CCGGACTGTCCGGTGTGCCATCGC  | 3  | 28  | RDR2-sensitive |
| CCGGACTGTCCGGTGGTGCACCAG  | 1  | 12  | RDR2-sensitive |
| CCGGACTGTCCGGTGTGCCACCAG  | 1  | 15  | RDR2-sensitive |
| CCGGACTGTCCGGTGTGCCACCGA  | 0  | 14  | RDR2-sensitive |
| CCGGACTGTCCGGTGTGCCAGCGG  | 0  | 13  | RDR2-sensitive |
| CCGGACTTCGGAGTGTGTACGCGG  | 0  | 10  | RDR2-sensitive |
| CCGGAGCCTGTAGTTCGGCAAGGA  | 0  | 14  | RDR2-sensitive |
| CCGGAGCTCGCACCCCTCGTCGTGT | 0  | 9   | RDR2-sensitive |
| CCGGAGGACCTGCCGGCTTGACGG  | 1  | 33  | RDR2-sensitive |
| CCGGAGGACCTGTAGAGACGGAGC  | 0  | 18  | RDR2-sensitive |
| CCGGAGGATAGCGTGCATGACGTA  | 0  | 10  | RDR2-sensitive |

|                           |    |     |                |
|---------------------------|----|-----|----------------|
| CCGGAGGCAGAACACGTCAGAGGC  | 0  | 11  | RDR2-sensitive |
| CCGGAGGCAGAACCAGGGGAGGCA  | 0  | 9   | RDR2-sensitive |
| CCGGAGGCTGATCGATGAAGACGT  | 0  | 19  | RDR2-sensitive |
| CCGGAGGTAGGGTCCAGCGGCCGG  | 49 | 0   | RDR2-resistant |
| CCGGAGTCATGTGGACGGAGTCGA  | 0  | 9   | RDR2-sensitive |
| CCGGAGTGGACTGTGTAAGCGGAT  | 0  | 15  | RDR2-sensitive |
| CCGGATAAGCAGAACCAGGCTCAA  | 5  | 200 | RDR2-sensitive |
| CCGGATACGGATAGTTAGAAACGG  | 0  | 15  | RDR2-sensitive |
| CCGGATACGGGTAGGATACGGGAT  | 0  | 11  | RDR2-sensitive |
| CCGGATACGGGTAGGATACGTGAT  | 0  | 9   | RDR2-sensitive |
| CCGGATAGATGGGAGGCAGAACGG  | 0  | 19  | RDR2-sensitive |
| CCGGATAGGACACCCAGAGACCAT  | 0  | 10  | RDR2-sensitive |
| CCGGATATAACTCCCAGGACGAC   | 0  | 30  | RDR2-sensitive |
| CCGGATATCGACGTAGCATGCCAC  | 0  | 13  | RDR2-sensitive |
| CCGGATATGGCATGAACCGGCCGA  | 0  | 12  | RDR2-sensitive |
| CCGGATATTGAACCTCGGATACGG  | 0  | 15  | RDR2-sensitive |
| CCGGATATTGGCTCTCGGATACGG  | 0  | 15  | RDR2-sensitive |
| CCGGATCAATTAACGGCAGAACGG  | 0  | 10  | RDR2-sensitive |
| CCGGATCGAGCTCAGCCAGATACG  | 0  | 26  | RDR2-sensitive |
| CCGGATCGGCCTGAGCTTCGCGGC  | 0  | 17  | RDR2-sensitive |
| CCGGATCTGCTTGGAGGCGTCTGTT | 3  | 30  | RDR2-sensitive |
| CCGGATGACTCCAGAAGCAGTCCA  | 0  | 17  | RDR2-sensitive |
| CCGGATGAGAAATGAAGGCACCAG  | 0  | 9   | RDR2-sensitive |
| CCGGATGAGGAGAGGAGACTGCTT  | 0  | 9   | RDR2-sensitive |
| CCGGATGCTGTGGCCCACGGACGG  | 0  | 11  | RDR2-sensitive |
| CCGGATGGCTATGTGCTTAGTGCG  | 18 | 1   | RDR2-resistant |
| CCGGATGGTCCGCGACTTAGGCAC  | 0  | 9   | RDR2-sensitive |
| CCGGATGTACGCAGAGGAGCCGCT  | 0  | 10  | RDR2-sensitive |
| CCGGATGTTGTGCACAGAGGGCAC  | 1  | 25  | RDR2-sensitive |
| CCGGATTGCAGCCGCAGCAAGCCG  | 0  | 16  | RDR2-sensitive |
| CCGGATTGCTAACTGTGTCGGCCC  | 0  | 20  | RDR2-sensitive |
| CCGGATTGCTTCGGAGACTGGCGT  | 0  | 14  | RDR2-sensitive |
| CCGGATTGTAGCCGCAGCAAGCCG  | 0  | 16  | RDR2-sensitive |
| CCGGATTGTATCGGTTGGCTGCAA  | 0  | 10  | RDR2-sensitive |
| CCGGATTGTCCGCAGTAGTGATGT  | 0  | 16  | RDR2-sensitive |
| CCGGCAAATGTAGCGGCTGAGGAA  | 0  | 29  | RDR2-sensitive |
| CCGGCAACAGAAGGTGGACAACAA  | 0  | 12  | RDR2-sensitive |
| CCGGCACAAACGAACAAGGCCTAA  | 0  | 11  | RDR2-sensitive |
| CCGGCACAAATAAGCGGGTTGGAC  | 0  | 11  | RDR2-sensitive |
| CCGGCACGAAGCCCCTTTTTGGG   | 0  | 20  | RDR2-sensitive |
| CCGGCACGACTAACAGACTCACGG  | 0  | 25  | RDR2-sensitive |
| CCGGCACGACTAACAGGCTCACGG  | 0  | 19  | RDR2-sensitive |
| CCGGCACGACTAGCAGGCTCACGG  | 0  | 15  | RDR2-sensitive |
| CCGGCACGACTAGCAGGCTGACGG  | 0  | 84  | RDR2-sensitive |
| CCGGCACGACTAGCAGGCTGGCAC  | 0  | 22  | RDR2-sensitive |
| CCGGCACGAGAGGCACTAGTCCAA  | 0  | 10  | RDR2-sensitive |
| CCGGCACGCACAGGGAAAAATCGT  | 3  | 49  | RDR2-sensitive |
| CCGGCACGCTGAGGAACGGGAGAA  | 0  | 12  | RDR2-sensitive |
| CCGGCACGGATATGACTGGACGGA  | 0  | 15  | RDR2-sensitive |



|                           |    |     |                |
|---------------------------|----|-----|----------------|
| CCGGCACGGCACGGCACTGACACG  | 0  | 10  | RDR2-sensitive |
| CCGGCACGGCACGGTACTCGACGG  | 0  | 17  | RDR2-sensitive |
| CCGGCACGGCCTGGTTCTATGCGG  | 0  | 16  | RDR2-sensitive |
| CCGGCACGGTACGAACAAGCGGGC  | 0  | 25  | RDR2-sensitive |
| CCGGCACGGTACGAATAAGCGGGC  | 0  | 14  | RDR2-sensitive |
| CCGGCACGGTAGAATAAACGGGCG  | 0  | 11  | RDR2-sensitive |
| CCGGCACGGTAGAATAAGCGGACG  | 0  | 10  | RDR2-sensitive |
| CCGGCACGGTAGAATAAGCGGGCA  | 1  | 67  | RDR2-sensitive |
| CCGGCACGGTAGAATAAGCGGGCC  | 0  | 20  | RDR2-sensitive |
| CCGGCACGGTAGAATAAGCGGGCG  | 9  | 287 | RDR2-sensitive |
| CCGGCACGGTAGAATAAGCGGGCT  | 3  | 46  | RDR2-sensitive |
| CCGGCACGGTATGAACAAGCGCGC  | 0  | 17  | RDR2-sensitive |
| CCGGCACGGTATGAATAAGCGGGC  | 0  | 33  | RDR2-sensitive |
| CCGGCACGTGAGCAGAGGATACAC  | 0  | 17  | RDR2-sensitive |
| CCGGCACTATTTGGACCAGGCCGA  | 0  | 14  | RDR2-sensitive |
| CCGGCACTGTTTTGGACGAGGGCT  | 0  | 11  | RDR2-sensitive |
| CCGGCACTGTTTTAGGACGGGCT   | 0  | 30  | RDR2-sensitive |
| CCGGCACTTAGGCCTACGCCGAG   | 0  | 15  | RDR2-sensitive |
| CCGGCAGAAACGAACAAGGCCTAA  | 0  | 18  | RDR2-sensitive |
| CCGGCAGTAGGCTCGTGACCCGGC  | 0  | 10  | RDR2-sensitive |
| CCGGCAGTGGGCTTGTGATTCCGGC | 0  | 17  | RDR2-sensitive |
| CCGGCATAGGCCTGACACACCGGC  | 0  | 11  | RDR2-sensitive |
| CCGGCATGACTAGCAGGCTGACGG  | 0  | 10  | RDR2-sensitive |
| CCGGCATGGTAGAATAAGCGGGCG  | 0  | 10  | RDR2-sensitive |
| CCGGCCATGGTGTAGAAGCGACGG  | 1  | 66  | RDR2-sensitive |
| CCGGCCCAGTTACTCGGACGCTGC  | 0  | 10  | RDR2-sensitive |
| CCGGCCCTGTGGAAGTGACGCCGA  | 3  | 27  | RDR2-sensitive |
| CCGGCCTGACAGAAGGACAGCGCC  | 0  | 12  | RDR2-sensitive |
| CCGGCGACTCGACGATGGCTCCGC  | 0  | 10  | RDR2-sensitive |
| CCGGCGATAGGCAGGCGAGAGCGG  | 0  | 10  | RDR2-sensitive |
| CCGGCGCTCGGACGGAAGGCGCGT  | 0  | 12  | RDR2-sensitive |
| CCGGCGGCAGGCTTGAGGCAGGAC  | 0  | 9   | RDR2-sensitive |
| CCGGCGTAGGTTCCGGCGTAGGCAA | 0  | 10  | RDR2-sensitive |
| CCGGCGTTGGAGCTTGCCGCTCGT  | 0  | 11  | RDR2-sensitive |
| CCGGCTAATGTAGATGGGAGGTGA  | 0  | 10  | RDR2-sensitive |
| CCGGCTACGCTCGTCCGGCGGCAC  | 1  | 20  | RDR2-sensitive |
| CCGGCTAGACTCGACAGAGATTGG  | 0  | 18  | RDR2-sensitive |
| CCGGCTATTCTGATTTTTTTGGC   | 17 | 1   | RDR2-resistant |
| CCGGCTCCGTAAAACGCACGGCCT  | 0  | 19  | RDR2-sensitive |
| CCGGCTCCGTAAAACGCACGGCGT  | 3  | 98  | RDR2-sensitive |
| CCGGCTCGGCTCGGCTCGTTAGTG  | 1  | 12  | RDR2-sensitive |
| CCGGCTGAAAGACGTACCCATGGC  | 2  | 21  | RDR2-sensitive |
| CCGGCTGCATGCGAAGGATAGCGT  | 0  | 16  | RDR2-sensitive |
| CCGGCTGGAATGAATCAAGGGAAG  | 0  | 14  | RDR2-sensitive |
| CCGGGAACAGGATCTGGATGTAC   | 0  | 9   | RDR2-sensitive |
| CCGGGAAGAAGAAGCAGCACGC    | 0  | 18  | RDR2-sensitive |
| CCGGGAAGTGGGCGCATGCATGCA  | 29 | 0   | RDR2-resistant |
| CCGGGACGAGTAAGCGGAGCCAA   | 1  | 13  | RDR2-sensitive |
| CCGGGACGGATACAGGTACTACCC  | 0  | 17  | RDR2-sensitive |

|                           |     |    |                |
|---------------------------|-----|----|----------------|
| CCGGGACGTGGACGGCTACAATAC  | 0   | 23 | RDR2-sensitive |
| CCGGGACTTCTTCTTCGACGCGGT  | 0   | 10 | RDR2-sensitive |
| CCGGGAGCAGGATGAACGAGCGCC  | 68  | 6  | RDR2-resistant |
| CCGGGAGCGAGATCCAGGCGCCGC  | 1   | 16 | RDR2-sensitive |
| CCGGGAGCGAGATCCAGGCGCCGT  | 0   | 15 | RDR2-sensitive |
| CCGGGATACGGATACCTCACTCAT  | 1   | 16 | RDR2-sensitive |
| CCGGGCAAAGATAACGGTGGAAAT  | 0   | 10 | RDR2-sensitive |
| CCGGGCACTCGAGGGCATATACGT  | 0   | 14 | RDR2-sensitive |
| CCGGGCACTCGGCAAACACTACTT  | 0   | 10 | RDR2-sensitive |
| CCGGGCAGTCTCGGACGCAGACGT  | 0   | 41 | RDR2-sensitive |
| CCGGGCAGTTTGCCTAGAGAAGAC  | 0   | 14 | RDR2-sensitive |
| CCGGGCCATGACTGAGGACGTGAC  | 0   | 11 | RDR2-sensitive |
| CCGGGCCGAATGCATGACGGGCTT  | 0   | 12 | RDR2-sensitive |
| CCGGGCCGTATAATCACGCGGGCT  | 0   | 10 | RDR2-sensitive |
| CCGGGCGATAGTGGTGTAGATGGC  | 1   | 21 | RDR2-sensitive |
| CCGGGCGGAAGACATTGTCAGGTG  | 134 | 27 | RDR2-resistant |
| CCGGGCGTAGGGTTCTTACGGCT   | 0   | 11 | RDR2-sensitive |
| CCGGGCTAAACTTTAGCAGGAGCA  | 0   | 18 | RDR2-sensitive |
| CCGGGCTAAACTTTAGCAGGGGCA  | 0   | 9  | RDR2-sensitive |
| CCGGGCTAGGATATCACAGTCGGG  | 0   | 9  | RDR2-sensitive |
| CCGGGCTATGGACGTGGTTCGTGGT | 0   | 9  | RDR2-sensitive |
| CCGGGCTCATCAGCGAGGTAGTAC  | 0   | 9  | RDR2-sensitive |
| CCGGGCTCGGACAAGAACTAGGC   | 1   | 19 | RDR2-sensitive |
| CCGGGCTCGGACAGGAACTAGGC   | 2   | 14 | RDR2-sensitive |
| CCGGGCTCGGACAGGAAATTAGGC  | 2   | 14 | RDR2-sensitive |
| CCGGGCTCTGATACCAGATGTCAG  | 1   | 20 | RDR2-sensitive |
| CCGGGCTCTGTAGGGTGTGCGCGG  | 0   | 12 | RDR2-sensitive |
| CCGGGCTGATTTGGTGACAAGGCG  | 0   | 9  | RDR2-sensitive |
| CCGGGCTGGAGGCACGACAGGCCT  | 0   | 15 | RDR2-sensitive |
| CCGGGCTGTCCGCGTGGAGCAGGC  | 0   | 12 | RDR2-sensitive |
| CCGGGCTGTGACTGTCTAGGCGC   | 2   | 14 | RDR2-sensitive |
| CCGGGCTGTGAGAGAAGAGGAAAT  | 0   | 19 | RDR2-sensitive |
| CCGGGCTGTGAGAGGAGGGGAAAT  | 3   | 34 | RDR2-sensitive |
| CCGGGCTTAGGCTGCATCAGCCAG  | 0   | 12 | RDR2-sensitive |
| CCGGGCTTTAAGGGACAAAGTCGG  | 0   | 10 | RDR2-sensitive |
| CCGGGGACCTGCCGACTTGACGGA  | 1   | 25 | RDR2-sensitive |
| CCGGGTAGTTCAGGACTGCAACGG  | 0   | 14 | RDR2-sensitive |
| CCGGGTCCGATACGGGTACTIONC  | 0   | 9  | RDR2-sensitive |
| CCGGGTCCGGCTAGCTAACGCGGT  | 0   | 13 | RDR2-sensitive |
| CCGGGTCCGGCACATGGCTAAGAC  | 14  | 0  | RDR2-resistant |
| CCGGGTGTAGAGATGGATTCGGAT  | 0   | 12 | RDR2-sensitive |
| CCGGGTTGGACTGCACGACGGGCT  | 0   | 15 | RDR2-sensitive |
| CCGGTACACCGTTGGATATTGGAC  | 0   | 19 | RDR2-sensitive |
| CCGGTACGCTACGACTTAAACGG   | 0   | 21 | RDR2-sensitive |
| CCGGTAGACTGGGTGGATGACGCT  | 0   | 10 | RDR2-sensitive |
| CCGGTAGATCTGACGGACGAGCTT  | 0   | 11 | RDR2-sensitive |
| CCGGTAGTAGGCCCGTGACCCGGC  | 0   | 15 | RDR2-sensitive |
| CCGGTATTGCTCGCCGAAGTTCGG  | 0   | 9  | RDR2-sensitive |
| CCGGTCAGAGGAACGTGCACTGTC  | 17  | 1  | RDR2-resistant |

|                          |    |    |                |
|--------------------------|----|----|----------------|
| CCGGTCAGTGGAGCGGCGAAGTGA | 12 | 85 | RDR2-sensitive |
| CCGGTCATTTTGGTAGAGCAGGAG | 0  | 17 | RDR2-sensitive |
| CCGGTCATTTTGTGGAGCGGGAG  | 0  | 9  | RDR2-sensitive |
| CCGGTCCAGACCTGACACGGCTAA | 0  | 15 | RDR2-sensitive |
| CCGGTCCGAACCCGGCACGGTAGA | 0  | 13 | RDR2-sensitive |
| CCGGTCCGAACCTGGCACGGTAGA | 0  | 17 | RDR2-sensitive |
| CCGGTCCGGTTAAAGAGTAGGCAT | 0  | 46 | RDR2-sensitive |
| CCGGTCCGGTTAGTATAGTGCCAG | 0  | 9  | RDR2-sensitive |
| CCGGTCCTGAGTCTAGACGGTCTG | 0  | 18 | RDR2-sensitive |
| CCGGTCGACCTGGACACGGATGGC | 0  | 22 | RDR2-sensitive |
| CCGGTCGACGTGAATGAGCGGATC | 0  | 15 | RDR2-sensitive |
| CCGGTCGTTTTGGTGGAGCGGAAG | 0  | 9  | RDR2-sensitive |
| CCGGTCTGAATTCGGCATGGCACG | 0  | 9  | RDR2-sensitive |
| CCGGTCTGACAAGAGGACAGCGCC | 0  | 9  | RDR2-sensitive |
| CCGGTCTGGCACGAATAAACGGAC | 0  | 11 | RDR2-sensitive |
| CCGGTCTGTGATGGGAGAATGCAT | 0  | 9  | RDR2-sensitive |
| CCGGTCTGTGGATAGAGGAGACAT | 1  | 25 | RDR2-sensitive |
| CCGGTCTTCGTCTTCCTGGATCGA | 0  | 9  | RDR2-sensitive |
| CCGGTGAATTATAGCGGAGCGCCT | 0  | 11 | RDR2-sensitive |
| CCGGTGACGTAGAGAGCATCAGGC | 42 | 10 | RDR2-resistant |
| CCGGTGACTGTCCGGCCGAACGGG | 0  | 32 | RDR2-sensitive |
| CCGGTGATTGACGATCGGACGGTT | 0  | 13 | RDR2-sensitive |
| CCGGTGCAGGATCTAGAAGACGAA | 8  | 85 | RDR2-sensitive |
| CCGGTGCGACGTAGAGAAGACGCC | 0  | 11 | RDR2-sensitive |
| CCGGTGGACCTGCAGGTGGGGCAT | 0  | 10 | RDR2-sensitive |
| CCGGTGTAGGATCTCGAAGGCGAC | 0  | 10 | RDR2-sensitive |
| CCGGTTCGTTGAGGCTTTGATGGC | 0  | 11 | RDR2-sensitive |
| CCGGTTCGTTGAGTGATTGGCG   | 0  | 13 | RDR2-sensitive |
| CCGGTTTTAGGCCAAGGTCGCGGT | 0  | 30 | RDR2-sensitive |
| CCGGTTTTCTGTTTTCTGGCGGCC | 35 | 0  | RDR2-resistant |
| CCGTAACCGATCGTGCGGGGCCGT | 0  | 17 | RDR2-sensitive |
| CCGTACCCACCGGTATCCGTCCG  | 0  | 10 | RDR2-sensitive |
| CCGTACCCATGAACATAGACCGGC | 0  | 15 | RDR2-sensitive |
| CCGTACCGGACTGCACACGCGCAT | 0  | 38 | RDR2-sensitive |
| CCGTACGAAGTCGGTGCAGGAAGA | 0  | 11 | RDR2-sensitive |
| CCGTACGACGCTGGAAGTAAGGTT | 0  | 14 | RDR2-sensitive |
| CCGTACTGTTACGCGGACTTGCC  | 0  | 9  | RDR2-sensitive |
| CCGTACTGTTACGCTGACTTGCC  | 2  | 22 | RDR2-sensitive |
| CCGTACTGTTACGGCTGACTTGCC | 0  | 15 | RDR2-sensitive |
| CCGTAGACCTCACCTCGCGCGTA  | 2  | 17 | RDR2-sensitive |
| CCGTAGACCTGAACTCGACGGGTA | 0  | 18 | RDR2-sensitive |
| CCGTAGACGAGTTGGACGGTTCGT | 0  | 44 | RDR2-sensitive |
| CCGTAGATCTCGAGCAAGGCAGAG | 0  | 24 | RDR2-sensitive |
| CCGTAGCGTGACAGAAGTCGGTAT | 0  | 9  | RDR2-sensitive |
| CCGTAGCGTGACAGTAGTCGGCAT | 0  | 12 | RDR2-sensitive |
| CCGTAGGACGACCCAGTAGAAGGC | 0  | 39 | RDR2-sensitive |
| CCGTAGGATTGCTGCTTGATGGTT | 0  | 36 | RDR2-sensitive |
| CCGTATAGAACCTGGTCGTGCCGG | 0  | 20 | RDR2-sensitive |
| CCGTATGAGTGTAGAGGGTAGGAG | 0  | 9  | RDR2-sensitive |

|                           |     |     |                |
|---------------------------|-----|-----|----------------|
| CCGTATTACTTCGTGTCGGATCGT  | 0   | 16  | RDR2-sensitive |
| CCGTCAACAGTAGAGGCGCAAGAA  | 0   | 13  | RDR2-sensitive |
| CCGTCACACTGTAGCTGCCGACGG  | 0   | 9   | RDR2-sensitive |
| CCGTCAGCAGTAGAGACGCAAGAA  | 0   | 50  | RDR2-sensitive |
| CCGTCAGCAGTAGAGGCACAAGAA  | 0   | 23  | RDR2-sensitive |
| CCGTCAGCAGTAGAGGCGCAACAA  | 0   | 10  | RDR2-sensitive |
| CCGTCAGCAGTAGAGGCGCAAGAA  | 5   | 287 | RDR2-sensitive |
| CCGTCAGCAGTAGAGGCGCGAGAA  | 2   | 55  | RDR2-sensitive |
| CCGTCAGCAGTAGAGGCGTAAGAA  | 0   | 19  | RDR2-sensitive |
| CCGTCAGCTGTAGACGGCCGCTAA  | 1   | 25  | RDR2-sensitive |
| CCGTCATCGCTTGGTCGTCGTCGT  | 0   | 10  | RDR2-sensitive |
| CCGTCCACTCTGTAACAACGGTCC  | 0   | 15  | RDR2-sensitive |
| CCGTCCATCGTCGATCTAGCGGAC  | 14  | 0   | RDR2-resistant |
| CCGTCCGATCTCGGCTGAACGGCC  | 31  | 0   | RDR2-resistant |
| CCGTCCGCGCCTGACCAGAGAGCA  | 1   | 37  | RDR2-sensitive |
| CCGTCCGCGCCTGTGCAGAGAGCA  | 0   | 13  | RDR2-sensitive |
| CCGTCGACGAAGCAGCGAAGTCAA  | 0   | 14  | RDR2-sensitive |
| CCGTCGTCGGCGCGGACGGTATCC  | 16  | 0   | RDR2-resistant |
| CCGTCTACAGTAGGGCATCGGACC  | 0   | 10  | RDR2-sensitive |
| CCGTCTGGAAGGGTGATTGTCGTG  | 0   | 22  | RDR2-sensitive |
| CCGTGAACTGTACATCGGCAACAG  | 0   | 18  | RDR2-sensitive |
| CCGTGACCTCGGCGCAGGAGCTGC  | 0   | 43  | RDR2-sensitive |
| CCGTGACTCTAAGCCAGACGGCCC  | 0   | 11  | RDR2-sensitive |
| CCGTGACTGGAACCGAGAGGAGGA  | 1   | 20  | RDR2-sensitive |
| CCGTGACTGGGACAGGCCATGGTC  | 0   | 23  | RDR2-sensitive |
| CCGTGACTTGGACGTAGGAGTGGC  | 1   | 24  | RDR2-sensitive |
| CCGTGAGCAGATAGAACCCTGCAC  | 0   | 12  | RDR2-sensitive |
| CCGTGAGCATCAGCTGGTCGTCGC  | 0   | 22  | RDR2-sensitive |
| CCGTGAGCCCGGCACGAAGCCCGC  | 1   | 14  | RDR2-sensitive |
| CCGTGAGCCTGTTAGTCGTGCCGG  | 0   | 12  | RDR2-sensitive |
| CCGTGAGGTTGGTGGAGGCCGGCG  | 143 | 19  | RDR2-resistant |
| CCGTGAGTAGGACTAGGCATTCCGG | 0   | 12  | RDR2-sensitive |
| CCGTGAGTCTGTTAGTCGTGCCGG  | 3   | 50  | RDR2-sensitive |
| CCGTGATCTGGACGCAGGAGCGAC  | 0   | 51  | RDR2-sensitive |
| CCGTGCCTAGCGTCGGATCGGTTT  | 0   | 10  | RDR2-sensitive |
| CCGTGCCTGTAGCCCGGTCAGCCC  | 0   | 10  | RDR2-sensitive |
| CCGTGCGCTGGGGGAAGAGAGCAA  | 24  | 1   | RDR2-resistant |
| CCGTGCTATAGAACAGAAGGGCGC  | 0   | 9   | RDR2-sensitive |
| CCGTGCTCTGGTTGGCGGCTCGAC  | 0   | 10  | RDR2-sensitive |
| CCGTGCTGTGAGCAGGAGCTGAT   | 0   | 28  | RDR2-sensitive |
| CCGTGGAACGCCTAGGACAACGGT  | 0   | 25  | RDR2-sensitive |
| CCGTGGAGCTTTGAGCGGACAGCT  | 0   | 10  | RDR2-sensitive |
| CCGTGGATTTAGCTCGGGATACGG  | 0   | 14  | RDR2-sensitive |
| CCGTGGCACAAGGTCGGACGGTCC  | 0   | 23  | RDR2-sensitive |
| CCGTGGCTCTGGACCGGACGGTCT  | 0   | 14  | RDR2-sensitive |
| CCGTGGCTCTGGACCGGATGGTTC  | 0   | 12  | RDR2-sensitive |
| CCGTGGCTCTGGGCAGGATGGTCC  | 0   | 10  | RDR2-sensitive |
| CCGTGGCTTTAGGACAGACGGTTT  | 0   | 21  | RDR2-sensitive |
| CCGTGGGTCTGTTATTGGCAAAA   | 1   | 26  | RDR2-sensitive |

|                           |    |    |                |
|---------------------------|----|----|----------------|
| CCGTGGTCCGGACAGTTCGCGGTG  | 0  | 11 | RDR2-sensitive |
| CCGTGGTTCTGCCCTCGGCGTCGG  | 0  | 17 | RDR2-sensitive |
| CCGTGTAGAGTGGACGGTTGACAT  | 0  | 11 | RDR2-sensitive |
| CCGTGTAGTGGGCTGCGATGGCAC  | 0  | 11 | RDR2-sensitive |
| CCGTGTCCACGTCCTGATCGGCT   | 24 | 0  | RDR2-resistant |
| CCGTGTGCGCACTGTAGGTCGGCT  | 0  | 10 | RDR2-sensitive |
| CCGTGTCTAGGACTCGGACGGTCC  | 0  | 26 | RDR2-sensitive |
| CCGTGTCTGGACCGAAGGCGTGCC  | 0  | 15 | RDR2-sensitive |
| CCGTGTCTGGGCTGAAGGCGTGCC  | 0  | 11 | RDR2-sensitive |
| CCGTGTCTTCACGTCGGATAGCGG  | 0  | 9  | RDR2-sensitive |
| CCGTGTTTGTACCGGGTCGGGCGG  | 0  | 10 | RDR2-sensitive |
| CCGTTAGAATTCGGCGGAGGACGA  | 0  | 11 | RDR2-sensitive |
| CCGTTAGCAACTCACTGGAGACAC  | 2  | 16 | RDR2-sensitive |
| CCGTTCAAGGGACTGCACGGCGTA  | 0  | 10 | RDR2-sensitive |
| CCGTTGAGAGACTGCACGGCGTA   | 0  | 9  | RDR2-sensitive |
| CCGTTGCGCTTGAGGAATGCGGGC  | 16 | 0  | RDR2-resistant |
| CCGTTGTTTTAGCTTTGAACCGGA  | 0  | 10 | RDR2-sensitive |
| CCGTTCTGGTAGAATAGCCCGGCT  | 0  | 10 | RDR2-sensitive |
| CCGTTCTGTAGCGGGTGAGACGTT  | 0  | 29 | RDR2-sensitive |
| CCGTTGACTGTTTCATATAATTAAC | 22 | 2  | RDR2-resistant |
| CCGTTGAGCAACTCTGTGAGGCAG  | 0  | 17 | RDR2-sensitive |
| CCGTTGGAAGTTGGCAGACGACGT  | 0  | 9  | RDR2-sensitive |
| CCGTTGGACAGACGTGCACAGCGC  | 0  | 9  | RDR2-sensitive |
| CCGTTGGACTCATGGCGCACCGGA  | 5  | 25 | RDR2-sensitive |
| CCGTTGGAGGCTGCTGATGTGCAC  | 0  | 9  | RDR2-sensitive |
| CCGTTGGATGTGGAAGGTGTGGTC  | 0  | 12 | RDR2-sensitive |
| CCGTTGGATGTGGAGGATGTGGTC  | 0  | 9  | RDR2-sensitive |
| CCGTTGGATGTGGAGGGTGTGGTC  | 3  | 60 | RDR2-sensitive |
| CCGTTGGATTGGTGGTATAGACGA  | 1  | 18 | RDR2-sensitive |
| CCGTTGGCAGAACGCGTCAGAGGC  | 1  | 22 | RDR2-sensitive |
| CCGTTGGCTCTCGGCAAAGACTGA  | 0  | 41 | RDR2-sensitive |
| CCGTTGGGAAGGGAGCTTCGAGGC  | 66 | 6  | RDR2-resistant |
| CCGTTGGGCTGGCCCGAGCACGGC  | 0  | 16 | RDR2-sensitive |
| CCGTTGTCATCGGGCTTTGTGCGT  | 0  | 25 | RDR2-sensitive |
| CCGTTGTTATCGGGCTTTGTGCAT  | 1  | 51 | RDR2-sensitive |
| CCGTTTAACTGTGGGCGTGCGGTG  | 0  | 42 | RDR2-sensitive |
| CCGTTTACTGTAGTGCACGGCCTG  | 0  | 59 | RDR2-sensitive |
| CCGTTTACTGTAGTGCACGGGCGT  | 0  | 9  | RDR2-sensitive |
| CCGTTTACTGTAGTGTGAGTGCCT  | 0  | 33 | RDR2-sensitive |
| CCGTTTATCTGTGCGGCCTAACGG  | 0  | 11 | RDR2-sensitive |
| CCGTTTCGGACCGGCATACCTCAT  | 0  | 19 | RDR2-sensitive |
| CCGTTTGTAGGGCATAGTGGTCAC  | 0  | 16 | RDR2-sensitive |
| CCGTTTGTGACGACCGTAGATGGC  | 0  | 17 | RDR2-sensitive |
| CCGTTTTCGGAATGAGTGACGTGC  | 0  | 11 | RDR2-sensitive |
| CCGTTTTCGGAATGGGTGACGTGC  | 3  | 78 | RDR2-sensitive |
| CCGTTTTGACTACGGCTCGTTGGT  | 0  | 10 | RDR2-sensitive |
| CCGTTTTGTCTCCGTCGGACCGGC  | 0  | 21 | RDR2-sensitive |
| CCGTTTTTGCCTCGGGTTGTACGG  | 0  | 19 | RDR2-sensitive |
| CCTAAACTGAGCAGGACGGGCTGT  | 0  | 15 | RDR2-sensitive |

|                           |     |    |                |
|---------------------------|-----|----|----------------|
| CCTAACCGTCCAGGCTTGTGGCAT  | 0   | 19 | RDR2-sensitive |
| CCTAACGTAGACTGTGGTGCACGG  | 1   | 17 | RDR2-sensitive |
| CCTAAGATCGGACGGTCCGCGGTC  | 0   | 13 | RDR2-sensitive |
| CCTAATCTGTAGGAGCCTAGAGGT  | 0   | 10 | RDR2-sensitive |
| CCTAATTTTCGGCGGCTGGCGCAT  | 0   | 10 | RDR2-sensitive |
| CCTACAGGCGCGGACCGTCCGGAC  | 0   | 9  | RDR2-sensitive |
| CCTACAGGCTGTATGGACGGAAAA  | 0   | 11 | RDR2-sensitive |
| CCTACGTATAGCTCTGACAGGCGT  | 0   | 14 | RDR2-sensitive |
| CCTACGTCGTGAAGATCGGGCATC  | 1   | 69 | RDR2-sensitive |
| CCTACTATCGCTGCGACTCGGCCG  | 0   | 9  | RDR2-sensitive |
| CCTACTCCTTGACTACGGCGAAC   | 0   | 38 | RDR2-sensitive |
| CCTACTCTCGGACGTCAATGCAGA  | 44  | 0  | RDR2-resistant |
| CCTACTGTAGACGGTCAGTGTCTG  | 0   | 14 | RDR2-sensitive |
| CCTAGAAACCTGATTCGCCGGCAC  | 0   | 9  | RDR2-sensitive |
| CCTAGAATCAGGGATGGAACGGCT  | 0   | 13 | RDR2-sensitive |
| CCTAGCACTGGCGGAACTGAGAAA  | 0   | 53 | RDR2-sensitive |
| CCTAGCACTGGCGGCACTGAAAAA  | 3   | 28 | RDR2-sensitive |
| CCTAGCACTGGCGGCACTGAAAAG  | 0   | 20 | RDR2-sensitive |
| CCTAGCTGTAGCAGCCGAAGGCGT  | 0   | 36 | RDR2-sensitive |
| CCTAGGACACTCGACACTCGGCAA  | 0   | 12 | RDR2-sensitive |
| CCTAGGATCTCTCCTCCCCGACGG  | 1   | 16 | RDR2-sensitive |
| CCTAGGCAGCTAGAACGGTAGAAT  | 0   | 9  | RDR2-sensitive |
| CCTAGGCTGAGAGAGGAGGAAGGT  | 0   | 15 | RDR2-sensitive |
| CCTAGGCTGAGAGAGGAGGGAGGC  | 1   | 16 | RDR2-sensitive |
| CCTAGGCTGTACCGGTGCATGCAC  | 2   | 26 | RDR2-sensitive |
| CCTAGTACGAGAGGAACCGTTGAT  | 74  | 7  | RDR2-resistant |
| CCTAGTCGGTGTAGACGTGCGGTA  | 0   | 12 | RDR2-sensitive |
| CCTATCAGACTATCTATCGGACAT  | 18  | 1  | RDR2-resistant |
| CCTATCGCGTAGGACAGTTCGGCA  | 0   | 9  | RDR2-sensitive |
| CCTATCGCGTAGGACAGTTCGGCT  | 0   | 17 | RDR2-sensitive |
| CCTATCGGACGCTGTATCAGGCAT  | 0   | 10 | RDR2-sensitive |
| CCTATGGTTGTGGAGGCTACGCAG  | 0   | 9  | RDR2-sensitive |
| CCTATTAGGACGCGGGTATGACGG  | 0   | 15 | RDR2-sensitive |
| CCTATTCGTACCGGGCCGAAACGG  | 2   | 93 | RDR2-sensitive |
| CCTATTCGTACTGGGCTGAAACGG  | 0   | 15 | RDR2-sensitive |
| CCTATTTCTGTAGTCTATCGGTTT  | 58  | 0  | RDR2-resistant |
| CCTCACGTGCGACTGTTGAGAGGGC | 2   | 51 | RDR2-sensitive |
| CCTCAGACTGTTATGCATGTGCAA  | 0   | 15 | RDR2-sensitive |
| CCTCAGCCTGGACCAGTTGAACGG  | 0   | 37 | RDR2-sensitive |
| CCTCAGCCTTAGCTCGTCCGGTAC  | 0   | 9  | RDR2-sensitive |
| CCTCAGCGAACTGTACATTGGCAA  | 0   | 11 | RDR2-sensitive |
| CCTCAGGCCATAGGATCGGACACC  | 0   | 9  | RDR2-sensitive |
| CCTCAGTGGTTCTTGTGTTTCGG   | 281 | 1  | RDR2-resistant |
| CCTCAGTTGACCCGTAGTTTCTT   | 0   | 12 | RDR2-sensitive |
| CCTCATAGCGACACTGTAGTCCGG  | 0   | 11 | RDR2-sensitive |
| CCTCATCTTCGGACCCGACGGCAT  | 0   | 12 | RDR2-sensitive |
| CCTCCAAAGACTGGCACATGACGA  | 0   | 9  | RDR2-sensitive |
| CCTCCACGCGGCGGACTCGGTGTC  | 0   | 9  | RDR2-sensitive |
| CCTCCCGACGACTGTACAGATTGC  | 0   | 9  | RDR2-sensitive |

|                           |     |     |                |
|---------------------------|-----|-----|----------------|
| CCTCCCGTCAACAGTAGAGGCGCA  | 0   | 9   | RDR2-sensitive |
| CCTCCCGTCAGCAGTAGAGACGCA  | 0   | 52  | RDR2-sensitive |
| CCTCCCGTCAGCAGTAGAGGCGCA  | 13  | 163 | RDR2-sensitive |
| CCTCCCGTCAGCAGTAGAGGCGCG  | 2   | 21  | RDR2-sensitive |
| CCTCCCGTCAGCAGTAGAGGCGTA  | 1   | 21  | RDR2-sensitive |
| CCTCCCTGTATCGAGCCGGACGGT  | 0   | 16  | RDR2-sensitive |
| CCTCCGAATTGTGATCGCGCGGAC  | 0   | 22  | RDR2-sensitive |
| CCTCCGGAATCGTAGCCACGGCGT  | 0   | 11  | RDR2-sensitive |
| CCTCCTCATCTTCGGACCCGACGG  | 0   | 24  | RDR2-sensitive |
| CCTCCTCCGTTGGATTGGTGGTAT  | 0   | 70  | RDR2-sensitive |
| CCTCCTCTACACGCTTTCGGACGG  | 0   | 9   | RDR2-sensitive |
| CCTCCTCTGCACACTTCCGGACGG  | 0   | 37  | RDR2-sensitive |
| CCTCCTCTGCACGCTTCCGGACGG  | 0   | 18  | RDR2-sensitive |
| CCTCCTCTGCACGCTTTCGGACGG  | 0   | 24  | RDR2-sensitive |
| CCTCCTCTGGGTGACTCGGGCGGC  | 1   | 14  | RDR2-sensitive |
| CCTCCTTGAGCGACAGATCGTCAT  | 0   | 9   | RDR2-sensitive |
| CCTCGAAACCAAGATCTGTGGCAT  | 0   | 17  | RDR2-sensitive |
| CCTCGAAACCTGGAGAGCCGAGCAA | 0   | 9   | RDR2-sensitive |
| CCTCGAACGAGCCGAGCCGAGCCT  | 0   | 10  | RDR2-sensitive |
| CCTCGACGACTGCGGCGACATGGC  | 0   | 11  | RDR2-sensitive |
| CCTCGACGGTACAGCTTACGGTGT  | 0   | 13  | RDR2-sensitive |
| CCTCGACTCGGAGCTGGATGGTCT  | 0   | 10  | RDR2-sensitive |
| CCTCGACTCGTGGATCCGATCGGC  | 3   | 29  | RDR2-sensitive |
| CCTCGACTGGATCCCGCGCAACAC  | 0   | 9   | RDR2-sensitive |
| CCTCGACTCAAGAACGCCGGCCT   | 0   | 10  | RDR2-sensitive |
| CCTCGAGGACGACGCTGCGGACGG  | 0   | 29  | RDR2-sensitive |
| CCTCGAGTTCGACTGCGCAGACGT  | 0   | 9   | RDR2-sensitive |
| CCTCGATGGGCTAGCAATGACGCT  | 0   | 9   | RDR2-sensitive |
| CCTCGCTTAGAATCAGGAGCTGGA  | 0   | 17  | RDR2-sensitive |
| CCTCGGACAAGTCGGCGTTGCTGT  | 0   | 17  | RDR2-sensitive |
| CCTCGGACTCAAGTCAGGCATCAC  | 0   | 10  | RDR2-sensitive |
| CCTCGGATACGGGTAGGATACGGA  | 3   | 61  | RDR2-sensitive |
| CCTCGGATCCGCGAGACGATGCAC  | 0   | 11  | RDR2-sensitive |
| CCTCGGCGAACTGTACATCGGCAA  | 0   | 14  | RDR2-sensitive |
| CCTCGGCGTCATAGACTGTAACGG  | 0   | 9   | RDR2-sensitive |
| CCTCGGCTCCGGCAGCGGCTCTAG  | 1   | 20  | RDR2-sensitive |
| CCTCGGGCCGCAACTAGGCTGCAT  | 0   | 10  | RDR2-sensitive |
| CCTCGGGCGAGACGGAAACCCCTC  | 0   | 14  | RDR2-sensitive |
| CCTCGGGCGAGTCGAAGGTGCGTC  | 115 | 10  | RDR2-resistant |
| CCTCGGGCTCTTCAACCGGATCGT  | 1   | 12  | RDR2-sensitive |
| CCTCGGTGAACCTAATGTCGGCAA  | 0   | 14  | RDR2-sensitive |
| CCTCGGTTAGTCGGGCCTGGCTAG  | 0   | 11  | RDR2-sensitive |
| CCTCGGTTCTTGTAGAAATTCGGT  | 3   | 18  | RDR2-sensitive |
| CCTCGTCGTCGAGGCTGCGGCTAC  | 1   | 14  | RDR2-sensitive |
| CCTCGTCTACTGCGACAACGTCAG  | 0   | 12  | RDR2-sensitive |
| CCTCGTTGTAGCCTCCGCGTCGGA  | 0   | 10  | RDR2-sensitive |
| CCTCTACACGCTTTCGGACGGTCT  | 0   | 10  | RDR2-sensitive |
| CCTCTAGGGCTGTGTGTTTGCGGT  | 0   | 12  | RDR2-sensitive |
| CCTCTCGTCGAGACGACAAGTCAT  | 0   | 10  | RDR2-sensitive |

|                             |     |    |                |
|-----------------------------|-----|----|----------------|
| CCTCTCTCGTTTGGACTTCCGGCC    | 0   | 13 | RDR2-sensitive |
| CCTCTCTGCGACGGTGTGGACGGG    | 0   | 20 | RDR2-sensitive |
| CCTCTGACCACTGGACGTTAGCAC    | 0   | 14 | RDR2-sensitive |
| CCTCTGACGTACTACAGTGGACAG    | 0   | 14 | RDR2-sensitive |
| CCTCTGACGTGGCAGTAACGACTC    | 0   | 13 | RDR2-sensitive |
| CCTCTGAGGCTCTGACCGAGGACC    | 0   | 23 | RDR2-sensitive |
| CCTCTGATCAGTAGGGAGGCTCGG    | 7   | 35 | RDR2-sensitive |
| CCTCTGATCAGTAGGGGGGCTCGG    | 3   | 16 | RDR2-sensitive |
| CCTCTGCACAGGGGCGGACGGTCC    | 2   | 27 | RDR2-sensitive |
| CCTCTGCAGAGGCGCGGACGGTCC    | 0   | 11 | RDR2-sensitive |
| CCTCTGCATCGAGGAGTGGCTCGG    | 0   | 14 | RDR2-sensitive |
| CCTCTGCGACGGTGTGGACGGTCC    | 0   | 11 | RDR2-sensitive |
| CCTCTGCGGCGGCGTGGACGGTCC    | 0   | 12 | RDR2-sensitive |
| CCTCTGGGTTGTAGGTGACGTCGG    | 0   | 9  | RDR2-sensitive |
| CCTCTGGTCAGGACTGCGGACGGT    | 0   | 31 | RDR2-sensitive |
| CCTCTGGTCAGGCGCGGACGGTCC    | 0   | 33 | RDR2-sensitive |
| CCTCTGTAGAGGCGCGGACGGTCC    | 2   | 35 | RDR2-sensitive |
| CCTCTGTAGTTCAATTGGGGACGG    | 0   | 16 | RDR2-sensitive |
| CCTCTGTATCTGTGGGAGCAGGCT    | 0   | 10 | RDR2-sensitive |
| CCTCTGTCGTGCTTATGGGAAGGG    | 0   | 10 | RDR2-sensitive |
| CCTCTGTTGACTGCGGCTTACAT     | 0   | 11 | RDR2-sensitive |
| CCTCTGTTGACTGTTGTTGCGGAC    | 0   | 24 | RDR2-sensitive |
| CCTCTTCGGGACCGTAGCGTTGGG    | 1   | 19 | RDR2-sensitive |
| CCTCTTGATCTTGGGGACACGCGC    | 0   | 10 | RDR2-sensitive |
| CCTCTTTGCTGAGTGCCCGTTGGA    | 0   | 10 | RDR2-sensitive |
| CCTCTTTGTTGGACGGAGAGAGGA    | 0   | 10 | RDR2-sensitive |
| CCTGAACAGCTTCTGAGGGTATT     | 139 | 0  | RDR2-resistant |
| CCTGAACAGCTTTCTGAGGGTATT    | 60  | 0  | RDR2-resistant |
| CCTGAACGAGGCTGCAGAAGTCGT    | 0   | 10 | RDR2-sensitive |
| CCTGAAGACGCACGGAACAAGGAC    | 1   | 15 | RDR2-sensitive |
| CCTGAAGACGTAGAGGACAGGAAT    | 0   | 21 | RDR2-sensitive |
| CCTGACACCTTTATCCTGACGCGC    | 2   | 15 | RDR2-sensitive |
| CCTGACACTCGGCAAAGAAGGCTC    | 0   | 19 | RDR2-sensitive |
| CCTGACACTCGGCAAAGAGAGCAC    | 0   | 10 | RDR2-sensitive |
| CCTGACACTTGGTGGGGACTTGGT    | 0   | 13 | RDR2-sensitive |
| CCTGACAGAAGGACAGCGCCGCCT    | 0   | 10 | RDR2-sensitive |
| CCTGACATTGCGCAAAGGCTCGGT    | 0   | 11 | RDR2-sensitive |
| CCTGACCAGAGAGCACCGCCGCGG    | 0   | 9  | RDR2-sensitive |
| CCTGACCTTACAGACTTCCTGCAT    | 0   | 12 | RDR2-sensitive |
| CCTGACGAAGCAAGGGCTGTGACC    | 0   | 9  | RDR2-sensitive |
| CCTGACGACGGACAGCGTGAGTAC    | 0   | 11 | RDR2-sensitive |
| CCTGACGAGTCGACGAGCTGATGA    | 0   | 10 | RDR2-sensitive |
| CCTGACGCAGCACCGTTGGATGTG    | 0   | 11 | RDR2-sensitive |
| CCTGACGCGTAGGACAGTTCGGCT    | 0   | 25 | RDR2-sensitive |
| CCTGACGCTGTTGACCCACGACGG    | 0   | 14 | RDR2-sensitive |
| CCTGACGGACGGCATGTGGTTCAA    | 1   | 15 | RDR2-sensitive |
| CCTGACGGACTGCGGAGGCGACAT    | 1   | 26 | RDR2-sensitive |
| CCTGACGGTGGCGAGGATGACGAA    | 1   | 13 | RDR2-sensitive |
| CCTGACGTACTIONGCGGAGGCGACAT | 0   | 15 | RDR2-sensitive |



|                           |     |     |                |
|---------------------------|-----|-----|----------------|
| CCTGACGTGGACTGGAGCTACGGT  | 0   | 29  | RDR2-sensitive |
| CCTGACTCTGACGCCCGGAAGCGC  | 0   | 13  | RDR2-sensitive |
| CCTGACTCTTGGTAGACTGGCTGA  | 0   | 79  | RDR2-sensitive |
| CCTGACTGTGTAGTGTGGATGGCC  | 0   | 9   | RDR2-sensitive |
| CCTGACTGTTTTGTCTCCGTCGGA  | 0   | 31  | RDR2-sensitive |
| CCTGACTTGGGCTGATTTGCGGTT  | 0   | 11  | RDR2-sensitive |
| CCTGAGACCTGTAGCAAAGGGGCC  | 0   | 10  | RDR2-sensitive |
| CCTGAGAGCCGGCAGCTGAGACGT  | 0   | 11  | RDR2-sensitive |
| CCTGAGATGATGCTAGGCTCGGCA  | 14  | 0   | RDR2-resistant |
| CCTGAGCTCTGTGGAATGCACGTC  | 182 | 67  | RDR2-resistant |
| CCTGAGGAGCTAAGCATTCGACGA  | 0   | 15  | RDR2-sensitive |
| CCTGAGGGTGGACTGTTTCGCGGTC | 0   | 9   | RDR2-sensitive |
| CCTGAGTGTAGAGGAGGTCCCTGA  | 0   | 115 | RDR2-sensitive |
| CCTGATAGCGTCTGCAGTCGGCTT  | 0   | 15  | RDR2-sensitive |
| CCTGATCACGTA CTGGAGCTAGGC | 0   | 26  | RDR2-sensitive |
| CCTGATCATCGTACATCTTCGGCA  | 45  | 2   | RDR2-resistant |
| CCTGATCATGTTGGACGGGCCGAG  | 0   | 10  | RDR2-sensitive |
| CCTGATCATGTTGGACGGGCCGGC  | 0   | 28  | RDR2-sensitive |
| CCTGATCGACGAGGACGGCTAGGG  | 0   | 17  | RDR2-sensitive |
| CCTGATCTCGGCAGCCTGGCGGTC  | 0   | 20  | RDR2-sensitive |
| CCTGATCTGCGACTGACTGACGGC  | 0   | 9   | RDR2-sensitive |
| CCTGATCTGCTGACGGGGAATCGA  | 2   | 41  | RDR2-sensitive |
| CCTGATGCAAGATCTCGAAGGCCGA | 0   | 12  | RDR2-sensitive |
| CCTGATGCTGTT CAGAGGTCCGAC | 8   | 32  | RDR2-sensitive |
| CCTGCACGTGGACTCTAAGGGCAT  | 0   | 53  | RDR2-sensitive |
| CCTGCAGA AACTACAGAACGGGT  | 0   | 12  | RDR2-sensitive |
| CCTGCAGTACGTCAGAGGAACCGG  | 0   | 15  | RDR2-sensitive |
| CCTGCATCATCTGACTGATTGGCT  | 18  | 0   | RDR2-resistant |
| CCTGCATCGGTTGAAACGGACGAT  | 0   | 10  | RDR2-sensitive |
| CCTGCCAGTCCGGCTGCAGGAGAC  | 0   | 11  | RDR2-sensitive |
| CCTGCCGGCGTGGTGGAGAGTCGT  | 0   | 16  | RDR2-sensitive |
| CCTGCCGGGACTGAGGAGATGCAT  | 0   | 9   | RDR2-sensitive |
| CCTGCGACGGCGCACAGACTCCTC  | 18  | 0   | RDR2-resistant |
| CCTGCGAGACAGAGCGGACGACAG  | 0   | 10  | RDR2-sensitive |
| CCTGCGATCGTGGAGCAAAGGCGT  | 0   | 10  | RDR2-sensitive |
| CCTGCGCACGCATGGACTGTTCCG  | 0   | 12  | RDR2-sensitive |
| CCTGCGCACGCGCGGACCGTCCGG  | 1   | 16  | RDR2-sensitive |
| CCTGCGCGCGATCTGTGACCGGTT  | 0   | 9   | RDR2-sensitive |
| CCTGCGCGCGTAGAAGCTGGGCTG  | 0   | 27  | RDR2-sensitive |
| CCTGCGCTGAGCCGGACGGTCCAC  | 1   | 12  | RDR2-sensitive |
| CCTGCGGAAGTCTGCGTGGACTGC  | 0   | 11  | RDR2-sensitive |
| CCTGCGGGACTACGGTTACAAATT  | 17  | 0   | RDR2-resistant |
| CCTGCGTCCGAGACGGACGGTCCGC | 0   | 21  | RDR2-sensitive |
| CCTGCTAGAACTGCAAGCGAGCAT  | 0   | 12  | RDR2-sensitive |
| CCTGCTGACGCGCAGAACGACGAC  | 0   | 9   | RDR2-sensitive |
| CCTGCTGTGGACGTGTACTACG    | 0   | 10  | RDR2-sensitive |
| CCTGCTTCAGACGACTCGAACGGC  | 0   | 22  | RDR2-sensitive |
| CCTGCTTGGACGGCTACGGACAAC  | 0   | 12  | RDR2-sensitive |
| CCTGGACAACGTGAGCGGAGGCTT  | 0   | 14  | RDR2-sensitive |

|                          |    |     |                |
|--------------------------|----|-----|----------------|
| CCTGGACACCAGGATGACGAGGAG | 23 | 3   | RDR2-resistant |
| CCTGGACAGCACCGGCCGTAGATC | 0  | 11  | RDR2-sensitive |
| CCTGGACAGTCAGCAAGCTGGCAT | 0  | 18  | RDR2-sensitive |
| CCTGGACCAATTGAACGGGCCGAG | 0  | 24  | RDR2-sensitive |
| CCTGGACCAGTTGAACGGGCCGAA | 0  | 9   | RDR2-sensitive |
| CCTGGACCAGTTGAACGGACCGAG | 0  | 32  | RDR2-sensitive |
| CCTGGACCAGTTGAACGGGCCGAA | 0  | 10  | RDR2-sensitive |
| CCTGGACCTGTTGAAGCACGTCAT | 0  | 48  | RDR2-sensitive |
| CCTGGACGCGGGACGAACACGAAG | 0  | 10  | RDR2-sensitive |
| CCTGGACTGAGCCCGGCTAGACTC | 0  | 26  | RDR2-sensitive |
| CCTGGACTGGGGAAGATGGTGCCT | 0  | 20  | RDR2-sensitive |
| CCTGGACTGTGGAAGATGGTGCTT | 0  | 10  | RDR2-sensitive |
| CCTGGACTTCTGCGAGGACCACCA | 0  | 9   | RDR2-sensitive |
| CCTGGACTTGGATACAGATCGGAT | 0  | 9   | RDR2-sensitive |
| CCTGGACTTGTGAGTACGCCGGA  | 1  | 14  | RDR2-sensitive |
| CCTGGACTTTGGGCTAGGATTGGC | 0  | 31  | RDR2-sensitive |
| CCTGGAGGCAGAACGCAAAAAGGC | 0  | 14  | RDR2-sensitive |
| CCTGGAGGCCACGTGGGATTCGG  | 0  | 18  | RDR2-sensitive |
| CCTGGATCATGTGGAAGACGACTG | 0  | 28  | RDR2-sensitive |
| CCTGGATCCACTGTAGTAGTGCAA | 0  | 10  | RDR2-sensitive |
| CCTGGATGTAGTTGGTAGACGGTT | 0  | 40  | RDR2-sensitive |
| CCTGGATTGGTTCGGTAGACACGG | 0  | 13  | RDR2-sensitive |
| CCTGGCACGGTAGAATAAGCGGGC | 2  | 186 | RDR2-sensitive |
| CCTGGCACTATTCGACTGGGCTT  | 0  | 13  | RDR2-sensitive |
| CCTGGCAGAAGGACCGTTGGACAT | 0  | 17  | RDR2-sensitive |
| CCTGGCCAGCAGCCTGATCGTTGG | 0  | 15  | RDR2-sensitive |
| CCTGGCGAAGTACTGAGCTGACGG | 0  | 12  | RDR2-sensitive |
| CCTGGCGGACTGCGGAGGCGACAT | 1  | 15  | RDR2-sensitive |
| CCTGGCGGCTAGGACTGACTTGGC | 0  | 9   | RDR2-sensitive |
| CCTGGCTCAGACTGGACTGGCTGA | 0  | 21  | RDR2-sensitive |
| CCTGGCTCGAGACTGACCCAGCAT | 0  | 17  | RDR2-sensitive |
| CCTGGCTCGCAAGAAAATCGGTGT | 0  | 10  | RDR2-sensitive |
| CCTGGCTCGCTAGAAACGGAAGAA | 0  | 9   | RDR2-sensitive |
| CCTGGCTCTGATACCACTGAAGGA | 22 | 1   | RDR2-resistant |
| CCTGGCTCTGGAGATGCGACCAAT | 0  | 29  | RDR2-sensitive |
| CCTGGCTGAGTAGAAACACGGGGT | 0  | 36  | RDR2-sensitive |
| CCTGGCTGTACGGCAACCAAACAC | 0  | 17  | RDR2-sensitive |
| CCTGGCTGTATCGAATGTGTGCAT | 0  | 10  | RDR2-sensitive |
| CCTGGCTGTTGACTGCATGGCTGC | 0  | 37  | RDR2-sensitive |
| CCTGGCTTCGAGGATGAACGGTAC | 6  | 22  | RDR2-sensitive |
| CCTGGGAACCGGCAAAGACATCTT | 0  | 9   | RDR2-sensitive |
| CCTGGGAACCGGCAAAGATGTCTT | 0  | 14  | RDR2-sensitive |
| CCTGGGACTCGACAAGCTGGCCAG | 0  | 10  | RDR2-sensitive |
| CCTGGGACTCGACAAGCTGGGCAG | 0  | 11  | RDR2-sensitive |
| CCTGGGCAGTGAGAAACGGAATAT | 0  | 10  | RDR2-sensitive |
| CCTGGGCGCAGGACAACACGAAGG | 0  | 14  | RDR2-sensitive |
| CCTGGGCGCAGGACGAACACGAAG | 0  | 10  | RDR2-sensitive |
| CCTGGGCGCGGGACGAACACGAAG | 20 | 103 | RDR2-sensitive |
| CCTGGGCTGCCGGCTACGCTCGTC | 0  | 12  | RDR2-sensitive |

|                           |     |     |                |
|---------------------------|-----|-----|----------------|
| CCTGGGCTGGCATCTCGACGGGAT  | 0   | 14  | RDR2-sensitive |
| CCTGGGCTGTAATGTGCAGACAAC  | 0   | 12  | RDR2-sensitive |
| CCTGGGCTGTTGTTTTCGGCGGAG  | 0   | 9   | RDR2-sensitive |
| CCTGGGCTTTTTCGGGCTGGCACGG | 0   | 15  | RDR2-sensitive |
| CCTGGGGAGTAAGCGTTTGGAGGC  | 15  | 0   | RDR2-resistant |
| CCTGGGGTTCGGGCGAAGCGGAGTT | 40  | 7   | RDR2-resistant |
| CCTGGGGTGGAAACATAGCGAGGAC | 0   | 13  | RDR2-sensitive |
| CCTGGGTCGAGTGTGGAACACGGT  | 0   | 9   | RDR2-sensitive |
| CCTGGGTGTAGAAGAGGTCCCCGA  | 0   | 14  | RDR2-sensitive |
| CCTGGGTTGTAACAGAGAAGGCAG  | 0   | 9   | RDR2-sensitive |
| CCTGGTAGTGCCCTCTGCGACGGT  | 0   | 14  | RDR2-sensitive |
| CCTGGTCGGTACGTGGTCGGGGCT  | 0   | 19  | RDR2-sensitive |
| CCTGGTCGTCCGACTAATCGTCGA  | 3   | 33  | RDR2-sensitive |
| CCTGGTGAGACTGCACGACGGCGC  | 0   | 10  | RDR2-sensitive |
| CCTGGTGCAGGAGCTCGGGTCCC   | 0   | 18  | RDR2-sensitive |
| CCTGGTGCGGCTGAACCGGATGGC  | 0   | 10  | RDR2-sensitive |
| CCTGGTGTTGGCACAGTAGTCGG   | 0   | 10  | RDR2-sensitive |
| CCTGTACCCGACAGGTCGGATATC  | 0   | 9   | RDR2-sensitive |
| CCTGTACGTGTGGATACCTCGGAA  | 2   | 16  | RDR2-sensitive |
| CCTGTACGTGTGGATACCTCGGAG  | 769 | 95  | RDR2-resistant |
| CCTGTACGTGTGGATACCTCGGCG  | 32  | 2   | RDR2-resistant |
| CCTGTAGACTGTCCGGTGCGCCAA  | 0   | 16  | RDR2-sensitive |
| CCTGTAGATCTGTTGGCACCGGCC  | 0   | 9   | RDR2-sensitive |
| CCTGTAGCGCTGACTCTTGGCATT  | 207 | 58  | RDR2-resistant |
| CCTGTAGGCAAAGGACGCCGGTGC  | 0   | 11  | RDR2-sensitive |
| CCTGTAGTACCTATGCATGTTGAC  | 38  | 0   | RDR2-resistant |
| CCTGTACAGTGACCCGAACCGGCA  | 0   | 23  | RDR2-sensitive |
| CCTGTACAGACCAGCGACTGCGGCG | 1   | 14  | RDR2-sensitive |
| CCTGTACGAGCACGGCACTGTACAG | 0   | 20  | RDR2-sensitive |
| CCTGTACGAGCAGGCCACCTGGCAT | 0   | 13  | RDR2-sensitive |
| CCTGTACGAGCTGGAACAAGAGCGG | 0   | 11  | RDR2-sensitive |
| CCTGTACGAGTGGCACTGGTACGGT | 0   | 19  | RDR2-sensitive |
| CCTGTACGCGGGCTGGGACAAGGCA | 0   | 22  | RDR2-sensitive |
| CCTGTACGCGTAGGACAGTTCGGCA | 0   | 34  | RDR2-sensitive |
| CCTGTACGCGTAGGACAGTTCGGCT | 2   | 293 | RDR2-sensitive |
| CCTGTACGCTTCTCTCGTTGTCGGA | 29  | 0   | RDR2-resistant |
| CCTGTACGGGACCCGAAAGATGGTG | 26  | 4   | RDR2-resistant |
| CCTGTACGGTATTCTCTGTGGAGGC | 0   | 10  | RDR2-sensitive |
| CCTGTACGTGTTGGACTTAGGTGGT | 0   | 10  | RDR2-sensitive |
| CCTGTACTGACTGAGGCATCGTCAC | 0   | 9   | RDR2-sensitive |
| CCTGTACTGGTCGGATACAGAGGTT | 0   | 10  | RDR2-sensitive |
| CCTGTACTTCTGGCTGTTAACGGAC | 0   | 11  | RDR2-sensitive |
| CCTGTGGAATGGACTGGTCGTCCG  | 0   | 11  | RDR2-sensitive |
| CCTGTGGACCTCTTTGTCCGCAC   | 0   | 21  | RDR2-sensitive |
| CCTGTGGAGCAAGGAAGCGAACGC  | 0   | 17  | RDR2-sensitive |
| CCTGTGTGACTCTGTAGTGTGCAT  | 0   | 9   | RDR2-sensitive |
| CCTGTGTGTTCTGGAAGTCCGGAT  | 0   | 12  | RDR2-sensitive |
| CCTGTGTTCAGCCTGTAGTAGCAT  | 0   | 11  | RDR2-sensitive |
| CCTGTGTTGCAGCTGTAGGGGCAT  | 0   | 13  | RDR2-sensitive |

|                           |    |    |                |
|---------------------------|----|----|----------------|
| CCTGTTCCGGTTGTTAGGGATTGGA | 0  | 19 | RDR2-sensitive |
| CCTGTTCCGGTTTGTAGGGATTGGA | 0  | 16 | RDR2-sensitive |
| CCTGTTCTCTGACATCTGCAGAAT  | 0  | 9  | RDR2-sensitive |
| CCTGTTGCCCTCGGCCTGGAACGG  | 0  | 10 | RDR2-sensitive |
| CCTGTTGCCGGCTGAGCGCGCGGA  | 0  | 9  | RDR2-sensitive |
| CCTGTTTGAAGTGTGGCACGGCAT  | 1  | 34 | RDR2-sensitive |
| CCTGTTTACTGCGGCGTGTGGAC   | 0  | 35 | RDR2-sensitive |
| CCTGTTTGGCACGAAGCACGATGG  | 0  | 9  | RDR2-sensitive |
| CCTGTTTGTTCGGCTTCTGGCAG   | 0  | 13 | RDR2-sensitive |
| CCTGTTTTCGACGGTCTCTGACGG  | 0  | 10 | RDR2-sensitive |
| CCTAACACAAGACGCTGGGCACT   | 0  | 10 | RDR2-sensitive |
| CCTAACACTGGACGCTGGGCACT   | 1  | 12 | RDR2-sensitive |
| CCTAACGTTGACACTGCGGACGG   | 0  | 17 | RDR2-sensitive |
| CCTACATCGAGACGTTGGGCACT   | 0  | 10 | RDR2-sensitive |
| CCTACATCGGGACGTTGGGCACT   | 0  | 12 | RDR2-sensitive |
| CCTACCGAAGGGCAGTGGACACT   | 0  | 11 | RDR2-sensitive |
| CCTACGCGTCTAGCTGCATGGCT   | 0  | 9  | RDR2-sensitive |
| CCTACTGGACGCCTAGAGGACGC   | 0  | 14 | RDR2-sensitive |
| CCTACTTCCAGCGTCGTACGGAG   | 0  | 19 | RDR2-sensitive |
| CCTAGTCTGTGGAGCGGTAAGGC   | 0  | 9  | RDR2-sensitive |
| CCTAGTGGGCTGGGCTGGGCTAC   | 2  | 41 | RDR2-sensitive |
| CCTCATACTGTAGAAGAGGGTAC   | 0  | 9  | RDR2-sensitive |
| CCTTCATCACCCACTTCGTCCGAT  | 0  | 9  | RDR2-sensitive |
| CCTCCAGACGGCTCGAATTACAT   | 0  | 17 | RDR2-sensitive |
| CCTCCCGTCAGCAGTAGAGACGC   | 0  | 20 | RDR2-sensitive |
| CCTCCCGTCAGCAGTAGAGGCGC   | 0  | 16 | RDR2-sensitive |
| CCTCCCTCCCGTCAGCAGTAGAG   | 0  | 10 | RDR2-sensitive |
| CCTCCGTCAGCAGTAGAGGCGCA   | 3  | 17 | RDR2-sensitive |
| CCTTCGCCCTGTAGCACGGATGG   | 32 | 3  | RDR2-resistant |
| CCTTCGCTGTAGTCGCCGGTCCGA  | 0  | 15 | RDR2-sensitive |
| CCTTCGGCTGCATGTGAAGATGAC  | 0  | 11 | RDR2-sensitive |
| CCTTCGGGGCTGCGGACGACTGGC  | 14 | 0  | RDR2-resistant |
| CCTTCGTCCCGACCGCAGAGGTGC  | 1  | 43 | RDR2-sensitive |
| CCTTCGTTCTTAGGCTCAGCGGCA  | 50 | 6  | RDR2-resistant |
| CCTTCTAGTGGACCCGGGGATATC  | 2  | 19 | RDR2-sensitive |
| CCTTCTAGTGGACTCGGGATATC   | 0  | 17 | RDR2-sensitive |
| CCTTCTCGACTGCGGAACCGGTGC  | 0  | 9  | RDR2-sensitive |
| CCTTCTCTCGGTTCCGGCTGTACGG | 0  | 9  | RDR2-sensitive |
| CCTTCTCTGCACGCTTCCGGACGG  | 1  | 15 | RDR2-sensitive |
| CCTTCTGTGACTGGCGCACCGGA   | 1  | 16 | RDR2-sensitive |
| CCTTCTTGACAAGCCGGACGGTAC  | 0  | 28 | RDR2-sensitive |
| CCTTGAAATTGGGACTAATGAGAC  | 0  | 9  | RDR2-sensitive |
| CCTTGATGATTAGTGGGTTGTTCGC | 0  | 11 | RDR2-sensitive |
| CCTTGATGTATCGTGAGGTTGGCT  | 15 | 0  | RDR2-resistant |
| CCTTGATTTGATGGGCGACGACAA  | 0  | 23 | RDR2-sensitive |
| CCTTGCAAGGCGGAACGACTGATC  | 0  | 10 | RDR2-sensitive |
| CCTTGCATGTCCGGCTGTAGGAGGC | 0  | 11 | RDR2-sensitive |
| CCTTGCATGTCCGGCTGTAGGGGCA | 0  | 15 | RDR2-sensitive |
| CCTTGCATGTCCGGCTGTAGGGGGC | 0  | 44 | RDR2-sensitive |

|                            |    |     |                |
|----------------------------|----|-----|----------------|
| CCTTGCCGCTCGGATCATCGTCGT   | 0  | 79  | RDR2-sensitive |
| CCTTGCCTTCTGTCTGTCGGGCGCA  | 10 | 87  | RDR2-sensitive |
| CCTTGCTATGTCTGGACCTGGTAA   | 0  | 15  | RDR2-sensitive |
| CCTTGCTGGGCGTGTAGAGGACGT   | 0  | 39  | RDR2-sensitive |
| CCTTGGAAGGCTGTAGTAGGGCCA   | 0  | 20  | RDR2-sensitive |
| CCTTGGACTACGGCGAACACGGAC   | 0  | 27  | RDR2-sensitive |
| CCTTGGCTAGTAGGAGTCGTGGTG   | 28 | 0   | RDR2-resistant |
| CCTTGGGACTGAACGAGGACGCGC   | 1  | 74  | RDR2-sensitive |
| CCTTGGGTTCGCGCGGACATCCGGC  | 41 | 2   | RDR2-resistant |
| CCTTGGTCTGCAGGAACATGACGG   | 0  | 11  | RDR2-sensitive |
| CCTTGGTGTAGAGGGCATACTGAA   | 0  | 38  | RDR2-sensitive |
| CCTTGTCTAAGGACCTCGGACAA    | 0  | 10  | RDR2-sensitive |
| CCTTGTCTCAAAGACCTCAGACGG   | 0  | 16  | RDR2-sensitive |
| CCTTGTGCGGGCAAGCGACGACGT   | 0  | 10  | RDR2-sensitive |
| CCTTGTGTCTCAAGGACTCCGGAT   | 0  | 9   | RDR2-sensitive |
| CCTTGTTGGACGGAGAAAGGAGGT   | 0  | 17  | RDR2-sensitive |
| CCTTGTTGGACGGAGAGAGGAGAT   | 0  | 27  | RDR2-sensitive |
| CCTTGTTGGACGGGGAGAGGAGGT   | 0  | 10  | RDR2-sensitive |
| CCTTTACACAGTAGGATTGTCGGC   | 0  | 9   | RDR2-sensitive |
| CCTTTCCGTCAACAGTAGAGGCGC   | 0  | 16  | RDR2-sensitive |
| CCTTTCTGTGCACTCGCGGACGGT   | 0  | 11  | RDR2-sensitive |
| CCTTTGAGGGCATCTCGGATGTGT   | 14 | 0   | RDR2-resistant |
| CCTTTGTTTGTCTCGGTACTTCGGT  | 15 | 0   | RDR2-resistant |
| CCTTTTCCCGTTGTAGTTAGGCTG   | 0  | 11  | RDR2-sensitive |
| CCTTTTCGTCTGTGGAGAGGTTA    | 2  | 22  | RDR2-sensitive |
| CCTTTTCTCGGGCACTCGGCAAAG   | 0  | 11  | RDR2-sensitive |
| CCTTTTGTCTCGGGCACTCGGCAAAG | 0  | 10  | RDR2-sensitive |
| CCTTTTTTTGGTGGTCTGTGGT     | 42 | 1   | RDR2-resistant |
| CGAAAACATGTGGAGCAGAGGCAA   | 1  | 19  | RDR2-sensitive |
| CGAAACAACGAGCACGGTGGACAG   | 0  | 10  | RDR2-sensitive |
| CGAAACAGCGAGCACGGTGGACAG   | 0  | 14  | RDR2-sensitive |
| CGAAACATTCTGGGCGACGTGGAC   | 0  | 10  | RDR2-sensitive |
| CGAAAGCGTGTAGAGGAGGATCAG   | 0  | 14  | RDR2-sensitive |
| CGAAAGGCACTGACCCAAGCTCGG   | 0  | 19  | RDR2-sensitive |
| CGAAATACGTCTGGGTAGGGTACGG  | 0  | 121 | RDR2-sensitive |
| CGAAATTAGTCTCTGTAGAGTGCC   | 27 | 0   | RDR2-resistant |
| CGAACAAGCCCTGACGGAACCTCGT  | 0  | 12  | RDR2-sensitive |
| CGAACAAGTTCTGAGCGGTGCCGT   | 0  | 13  | RDR2-sensitive |
| CGAACAGACGTAGATGGACGACGG   | 0  | 18  | RDR2-sensitive |
| CGAACAGAGAGCTCCCAGCAACGG   | 0  | 31  | RDR2-sensitive |
| CGAACATGGCGGAACTGACAGGAG   | 0  | 19  | RDR2-sensitive |
| CGAACCAAGAGTACCTGACTGCAA   | 0  | 29  | RDR2-sensitive |
| CGAACCACTGCATGCAGACAGCAT   | 0  | 16  | RDR2-sensitive |
| CGAACAGCGACGGTGCTCTCTGC    | 0  | 18  | RDR2-sensitive |
| CGAACCATGCTCGGACCAGGCTAA   | 0  | 12  | RDR2-sensitive |
| CGAACCCAGGACCTGAGGAGTGCT   | 12 | 29  | RDR2-sensitive |
| CGAACCCAGGACTTAGAGGTGCTA   | 0  | 9   | RDR2-sensitive |
| CGAACCCAGGACTTGGAGGTGCTA   | 0  | 22  | RDR2-sensitive |
| CGAACCCGTTTGGCACGAAGCACG   | 0  | 13  | RDR2-sensitive |

|                           |    |     |                |
|---------------------------|----|-----|----------------|
| CGAACCGAACCCGAATAGACCGAA  | 0  | 9   | RDR2-sensitive |
| CGAACCGAGCTGCAGCGAACCCAA  | 0  | 9   | RDR2-sensitive |
| CGAACCGCGGAACAGGATTCGGCC  | 0  | 14  | RDR2-sensitive |
| CGAACCGGAAGCACTGAGACGAAC  | 0  | 21  | RDR2-sensitive |
| CGAACCGGACGGCACACCTGCCAA  | 0  | 19  | RDR2-sensitive |
| CGAACGAACGGGCGGCGACTGCAC  | 0  | 16  | RDR2-sensitive |
| CGAACGACTGGGCGGCGGCTGGAC  | 0  | 9   | RDR2-sensitive |
| CGAACGGAAGTGCCTGGAGACGAA  | 0  | 12  | RDR2-sensitive |
| CGAACGGACAATGGCGACGTGCAA  | 0  | 11  | RDR2-sensitive |
| CGAACGGACAGTAACGGTCCGCAT  | 0  | 9   | RDR2-sensitive |
| CGAACGGATTGGCATCACCACGAC  | 0  | 11  | RDR2-sensitive |
| CGAACGGCTAGGAACCCCTCCGGT  | 53 | 12  | RDR2-resistant |
| CGAACGGGCGTAGGAACAGCGGAG  | 0  | 12  | RDR2-sensitive |
| CGAACGTAGAAGCGCAGTGCAGAC  | 0  | 18  | RDR2-sensitive |
| CGAACTCAGGACCTGGAGGTGCTA  | 0  | 10  | RDR2-sensitive |
| CGAACTCAGGATCCGGCGAGGCAA  | 0  | 19  | RDR2-sensitive |
| CGAACTCGGCACGGCATAGACCGA  | 0  | 28  | RDR2-sensitive |
| CGAACTGGAAGAAGTGCAAGTCGT  | 0  | 20  | RDR2-sensitive |
| CGAACTGGAGAAAGTGCAAGCCGT  | 0  | 12  | RDR2-sensitive |
| CGAACTGGAGGACCTGCCTGCAGC  | 0  | 9   | RDR2-sensitive |
| CGAACTGGGACTAGAGGACGACAA  | 0  | 13  | RDR2-sensitive |
| CGAACTGGGACTAGAGGACGACGA  | 2  | 47  | RDR2-sensitive |
| CGAACTGTACAGATGCGGAGCTAT  | 0  | 9   | RDR2-sensitive |
| CGAACTGTACATCGACAACGGCTT  | 0  | 23  | RDR2-sensitive |
| CGAACTGTACATCGGCAACAGCAT  | 8  | 186 | RDR2-sensitive |
| CGAACTGTACATCGGCAACAGCCT  | 2  | 238 | RDR2-sensitive |
| CGAACTGTACATCGGCAACAGCTA  | 0  | 9   | RDR2-sensitive |
| CGAACTGTACATCGGCAACAGCTT  | 16 | 207 | RDR2-sensitive |
| CGAACTGTACATCGGCAACGGCCT  | 0  | 22  | RDR2-sensitive |
| CGAACTGTACATCGGCAACGGCTT  | 0  | 28  | RDR2-sensitive |
| CGAACTGTATATCAGCAACGGCTT  | 0  | 16  | RDR2-sensitive |
| CGAACTGTGAAACTGCGAATGGCT  | 57 | 9   | RDR2-resistant |
| CGAACTGTGTTACATCGGCGTCAT  | 0  | 84  | RDR2-sensitive |
| CGAACTGTGTTACCTCAGCGTCAT  | 0  | 43  | RDR2-sensitive |
| CGAACTGTGTTACTTCGACGTCAT  | 0  | 90  | RDR2-sensitive |
| CGAACTTACACATGTCGGCGTCAT  | 0  | 15  | RDR2-sensitive |
| CGAAGACAAAACGGGCAGGGACAC  | 0  | 50  | RDR2-sensitive |
| CGAAGACCTGGGCATCTGGAGGCG  | 0  | 9   | RDR2-sensitive |
| CGAAGACGATGGCGACAGGAACAC  | 0  | 12  | RDR2-sensitive |
| CGAAGACTGGAAGTAGGGACGTTC  | 0  | 10  | RDR2-sensitive |
| CGAAGACTGGAGCGAGCAGGGCAA  | 0  | 11  | RDR2-sensitive |
| CGAAGACTTGACGGGCAGGGCAA   | 0  | 11  | RDR2-sensitive |
| CGAAGACTTGGGCGGGCAGGGCAA  | 0  | 11  | RDR2-sensitive |
| CGAAGAGACGTACGTACAGAGCAT  | 0  | 9   | RDR2-sensitive |
| CGAAGAGTCAAGGACGGGAACGGC  | 0  | 15  | RDR2-sensitive |
| CGAAGATGGTATGACTCGGCCGCC  | 35 | 3   | RDR2-resistant |
| CGAAGCACGGAATAGACACGGCAC  | 0  | 10  | RDR2-sensitive |
| CGAAGCGGACTGACGGTGTAGATT  | 0  | 22  | RDR2-sensitive |
| CGAAGGACGAAGGGCATTAAACCAT | 0  | 14  | RDR2-sensitive |

|                           |     |     |                |
|---------------------------|-----|-----|----------------|
| CGAAGGACGACGTCATCACCACGC  | 0   | 9   | RDR2-sensitive |
| CGAAGGAGGCGGCTGCAGCATCGA  | 0   | 10  | RDR2-sensitive |
| CGAAGGAGGCTCGGCTCGGTTCGA  | 0   | 20  | RDR2-sensitive |
| CGAAGGAGGTAGAGGCATCATCGG  | 0   | 18  | RDR2-sensitive |
| CGAAGGCAGAACCAGGGGACACAG  | 0   | 12  | RDR2-sensitive |
| CGAAGGCAGAACCAGGGGAGGCAG  | 0   | 27  | RDR2-sensitive |
| CGAAGGCAGAACCGTGCACCACAC  | 0   | 9   | RDR2-sensitive |
| CGAAGGCAGAACGGCAGAACGGCA  | 0   | 11  | RDR2-sensitive |
| CGAAGGCCTGCGGTGACGTCTCCC  | 0   | 10  | RDR2-sensitive |
| CGAAGGCGTGGCACGACGGGCTAG  | 0   | 14  | RDR2-sensitive |
| CGAAGGGACTGTACCTGGCGGCGT  | 27  | 49  | RDR2-sensitive |
| CGAAGGGGAATAGAACGGCTCCAT  | 0   | 16  | RDR2-sensitive |
| CGAAGGGTCCCCGTGAACGTCAA   | 0   | 14  | RDR2-sensitive |
| CGAAGGTCTTGCCTGAAGAAGCAG  | 0   | 9   | RDR2-sensitive |
| CGAAGTCCGTGCAGGAAGATGTAC  | 1   | 26  | RDR2-sensitive |
| CGAAGTCTGCATGATACTGATGGT  | 7   | 23  | RDR2-sensitive |
| CGAATAAGCGGGACGGGCTCGGAC  | 0   | 17  | RDR2-sensitive |
| CGAATAAGCGGGATGGGCTCGGAC  | 0   | 20  | RDR2-sensitive |
| CGAATAAGCGGGCCGGGCTCGGAC  | 3   | 42  | RDR2-sensitive |
| CGAATAAGCGGGTCCGGGCTCGGAC | 0   | 13  | RDR2-sensitive |
| CGAATAGAATTGTCGTGACATCAT  | 0   | 13  | RDR2-sensitive |
| CGAATCCCTGGGCACGCGTCCGGCA | 0   | 17  | RDR2-sensitive |
| CGAATCCTGGATGAGACGTGACAG  | 0   | 23  | RDR2-sensitive |
| CGAATCGGACGCCACAACCTGCGGC | 0   | 9   | RDR2-sensitive |
| CGAATCGGCTGCCACACCTACGGC  | 0   | 11  | RDR2-sensitive |
| CGAATGGAAGGACACGGACAGCGG  | 1   | 18  | RDR2-sensitive |
| CGAATGGGCTGTCTGATAGGCTTC  | 0   | 18  | RDR2-sensitive |
| CGAATGTTTGAACCTCCGTTCCGGG | 1   | 88  | RDR2-sensitive |
| CGAATTCGAACCTATGTGGAATACG | 20  | 0   | RDR2-resistant |
| CGAATTCGTAGAGCCTAAAGGCGT  | 0   | 9   | RDR2-sensitive |
| CGAATTCGTGGAGCCTGAAGGCGT  | 0   | 23  | RDR2-sensitive |
| CGAATTGCATTCCGGACCGGACTAA | 0   | 9   | RDR2-sensitive |
| CGAATTTTTTTGGATCATGTCGT   | 0   | 10  | RDR2-sensitive |
| CGACAAAAGGCACTCGGCAAAGAA  | 0   | 17  | RDR2-sensitive |
| CGACAACCCTGTAGAGCGCGGCGA  | 0   | 31  | RDR2-sensitive |
| CGACAACGAGCTCAGGGAAGGTGT  | 1   | 13  | RDR2-sensitive |
| CGACAAGAACCCTGGCGACGTCAA  | 0   | 39  | RDR2-sensitive |
| CGACAAGTTGTAGCTCGGCGCCAA  | 0   | 22  | RDR2-sensitive |
| CGACACCACTGTTGGGCTGCCGGC  | 4   | 20  | RDR2-sensitive |
| CGACACCACTGTTGGGCTGTCCGGC | 0   | 15  | RDR2-sensitive |
| CGACACCACTGTTGGGCTGTCCGGT | 0   | 9   | RDR2-sensitive |
| CGACACGACGGTACTGGTCTAGGC  | 0   | 14  | RDR2-sensitive |
| CGACACGACTAGCAGGCTGATGGG  | 0   | 9   | RDR2-sensitive |
| CGACACGACTCTCGGCAACGGATA  | 657 | 54  | RDR2-resistant |
| CGACACGACTGTGCGACGCCGCAT  | 3   | 16  | RDR2-sensitive |
| CGACACGATAGAATAAGCGGGCGG  | 0   | 9   | RDR2-sensitive |
| CGACACGCTGTTGACTCGGGTCGT  | 1   | 282 | RDR2-sensitive |
| CGACACGGCACGGTACTGGCACGG  | 0   | 9   | RDR2-sensitive |
| CGACACGGCATGTAGTGAACGGGG  | 0   | 9   | RDR2-sensitive |

|                           |    |    |                |
|---------------------------|----|----|----------------|
| CGACACGGGCTAGATGCACGCGGG  | 1  | 15 | RDR2-sensitive |
| CGACACGGTAGAATAAGCGGGCAG  | 0  | 44 | RDR2-sensitive |
| CGACACGGTAGAATAAGCGGGCGG  | 1  | 24 | RDR2-sensitive |
| CGACACGTAGAGGGCGCTGTAGGG  | 1  | 25 | RDR2-sensitive |
| CGACACGTAGGAGGCGCTGTAGGG  | 0  | 14 | RDR2-sensitive |
| CGACACGTAGGGGACGCTGTAGAG  | 0  | 10 | RDR2-sensitive |
| CGACACGTAGGGGGCGCTGTAGGG  | 0  | 16 | RDR2-sensitive |
| CGACACGTAGTGAACCGGGCTCGT  | 0  | 10 | RDR2-sensitive |
| CGACACGTGGACCAATCAGATCGC  | 0  | 28 | RDR2-sensitive |
| CGACACGTGGACCAGTCAGATCGC  | 2  | 15 | RDR2-sensitive |
| CGACACTAAATTATTTTCGGGCCGT | 0  | 10 | RDR2-sensitive |
| CGACACTGTGCTGTGGGTCCACGA  | 0  | 15 | RDR2-sensitive |
| CGACACTGTTGCAGCTGTTTGGAC  | 0  | 17 | RDR2-sensitive |
| CGACACTGTTGCAGCTGTTTGGAT  | 1  | 18 | RDR2-sensitive |
| CGACAGAGAGCACACAAGACACAT  | 2  | 27 | RDR2-sensitive |
| CGACAGAGGAAACACACGAGACAC  | 0  | 14 | RDR2-sensitive |
| CGACAGATAGCACACGAGACACAT  | 0  | 11 | RDR2-sensitive |
| CGACAGCACTGTAGACACGGCTGC  | 0  | 11 | RDR2-sensitive |
| CGACAGCGCGGCAGGTAGCTCGGC  | 1  | 17 | RDR2-sensitive |
| CGACAGCGTCGCCACTGGAGGCAT  | 0  | 23 | RDR2-sensitive |
| CGACAGGCTAACAGAACGGTACAG  | 0  | 10 | RDR2-sensitive |
| CGACAGTAGACACACAGACGTGGC  | 0  | 16 | RDR2-sensitive |
| CGACAGTGCTCTCTGCACAGGCGT  | 0  | 27 | RDR2-sensitive |
| CGACAGTTGGCACTCCAGGTAGAG  | 0  | 21 | RDR2-sensitive |
| CGACAGTTTCTCTCCAAGGGACGT  | 0  | 10 | RDR2-sensitive |
| CGACAGTTTCTGTTTCATGCCGGTT | 18 | 0  | RDR2-resistant |
| CGACATCACATGTGGACCGTCCGG  | 0  | 16 | RDR2-sensitive |
| CGACATCGAGACGGGGCGACTGAA  | 0  | 10 | RDR2-sensitive |
| CGACATGGACTGTAGGAGCGGGGT  | 1  | 12 | RDR2-sensitive |
| CGACATGTGGAACGTGGCGCGGTT  | 0  | 26 | RDR2-sensitive |
| CGACATGTGTTACCTCGGCGTCAT  | 0  | 14 | RDR2-sensitive |
| CGACCAAAGTATTGTAGACGGTCC  | 0  | 10 | RDR2-sensitive |
| CGACCAAAGACTCTCCGAAGACAAT | 1  | 13 | RDR2-sensitive |
| CGACCAAAGGGACGTTCTGGGTGGC | 0  | 10 | RDR2-sensitive |
| CGACCAGACGTCATACACCTCAC   | 2  | 19 | RDR2-sensitive |
| CGACCAGAGACTCATACACCTCAC  | 0  | 14 | RDR2-sensitive |
| CGACCAGCACGACGGACGAATAA   | 2  | 16 | RDR2-sensitive |
| CGACCATGGATTCTCAGGCGCCAA  | 0  | 23 | RDR2-sensitive |
| CGACCATGGATTCTCGGGCGGCAA  | 1  | 38 | RDR2-sensitive |
| CGACCCATCTGGACTGGGGCACGC  | 0  | 18 | RDR2-sensitive |
| CGACCCATCTGGGCTGGGGCACGC  | 9  | 61 | RDR2-sensitive |
| CGACCCAGGGCTCGGACTCGGGC   | 87 | 36 | RDR2-resistant |
| CGACCCGAACCGAACCATTAACGG  | 0  | 11 | RDR2-sensitive |
| CGACCCGAACCTGCAGAAAATCGT  | 0  | 19 | RDR2-sensitive |
| CGACCCGGCTTTGGCGGACTCGGC  | 0  | 9  | RDR2-sensitive |
| CGACCCGTAGTGCTGGCACGGGCA  | 0  | 12 | RDR2-sensitive |
| CGACCCGTGAGTAGGACTAGGCAT  | 1  | 35 | RDR2-sensitive |
| CGACCCCTAACTCTAATGGACCGGC | 0  | 12 | RDR2-sensitive |
| CGACCCCTGTAGCAATGACGCGCAT | 0  | 16 | RDR2-sensitive |



|                          |    |    |                |
|--------------------------|----|----|----------------|
| CGACCCTGTAGCAATGACGCGCGC | 0  | 21 | RDR2-sensitive |
| CGACCGACTGTTGGCTCACCGGAC | 0  | 11 | RDR2-sensitive |
| CGACCGATCGGAATCAGATGACGC | 0  | 9  | RDR2-sensitive |
| CGACCGCGCCTGTAGACCGGACGG | 0  | 22 | RDR2-sensitive |
| CGACCGTACACTCTTAAAGCGGCT | 2  | 14 | RDR2-sensitive |
| CGACCGTACTGGCATGACACGGCT | 0  | 9  | RDR2-sensitive |
| CGACCGTAGGACTGAAGACGTGTG | 0  | 20 | RDR2-sensitive |
| CGACCGTGAGAGCCGACGTGCGTG | 0  | 14 | RDR2-sensitive |
| CGACCGTTGGACAGGCGCGGGCT  | 0  | 11 | RDR2-sensitive |
| CGACCGTTGGCTCACCGGACAGTC | 10 | 38 | RDR2-sensitive |
| CGACCGTTGGCTGAGGCACGTGGC | 0  | 35 | RDR2-sensitive |
| CGACCTAGACTCCTCCAATCGGCG | 0  | 9  | RDR2-sensitive |
| CGACCTAGACTCCTCTAATCGGCG | 0  | 9  | RDR2-sensitive |
| CGACCTCGCTAGGACTGTCGTCAT | 0  | 12 | RDR2-sensitive |
| CGACCTCGGCTGCAGCGGCGGGGA | 15 | 0  | RDR2-resistant |
| CGACCTCTGGAAGCAGTACTACGT | 0  | 13 | RDR2-sensitive |
| CGACCTGGTGCAGGAGCTCGGGTT | 1  | 15 | RDR2-sensitive |
| CGACCTGTACAACGATGCTGCGGC | 0  | 18 | RDR2-sensitive |
| CGACGAACAAGTTCTGAGCGGTGC | 0  | 20 | RDR2-sensitive |
| CGACGAACAGCAAGCTGTGGACGA | 0  | 15 | RDR2-sensitive |
| CGACGAACTGTACATCATCGGCAA | 0  | 14 | RDR2-sensitive |
| CGACGAACTGTACATCGGCAACAA | 0  | 30 | RDR2-sensitive |
| CGACGAACTGTACATCGGCAACAG | 0  | 96 | RDR2-sensitive |
| CGACGAAGACCTGGGCATCTGGAG | 0  | 14 | RDR2-sensitive |
| CGACGACAGACGGCGTCTGAGCAC | 0  | 18 | RDR2-sensitive |
| CGACGACCTTCAGCTTGACGACGA | 0  | 9  | RDR2-sensitive |
| CGACGACGAGAAGAAGCTTGCGCA | 0  | 12 | RDR2-sensitive |
| CGACGACGCAGGAGCTCTCCGGCT | 0  | 9  | RDR2-sensitive |
| CGACGACGGACGGCGTAATTCGGG | 0  | 18 | RDR2-sensitive |
| CGACGACTCGACGGCAAATGACGA | 0  | 16 | RDR2-sensitive |
| CGACGACTCGACTGTGAACGGCGC | 0  | 19 | RDR2-sensitive |
| CGACGACTCTCGGGTTGTTCTGGA | 0  | 12 | RDR2-sensitive |
| CGACGACTCTCGGGTTGTTCTGGG | 0  | 16 | RDR2-sensitive |
| CGACGACTGCACGGCACTGCTCGA | 35 | 78 | RDR2-sensitive |
| CGACGACTGTACAGATTACGCCAC | 0  | 48 | RDR2-sensitive |
| CGACGACTGTACAGATTACCGCG  | 0  | 32 | RDR2-sensitive |
| CGACGACTGTACAGATTACGTCAC | 0  | 24 | RDR2-sensitive |
| CGACGACTGTACAGATTGCACCAC | 0  | 20 | RDR2-sensitive |
| CGACGACTGTACAGATTGCGCCAC | 2  | 65 | RDR2-sensitive |
| CGACGACTGTACAGATTGCGCCAT | 1  | 26 | RDR2-sensitive |
| CGACGACTGTACAGATTGCGTCAC | 0  | 15 | RDR2-sensitive |
| CGACGACTGTACATATTACGCCAC | 0  | 17 | RDR2-sensitive |
| CGACGACTGTATAGATTGCGTCAC | 2  | 63 | RDR2-sensitive |
| CGACGACTTCGTTGATCTTCCGGC | 15 | 0  | RDR2-resistant |
| CGACGAGAACACCCTGATAGACGC | 0  | 10 | RDR2-sensitive |
| CGACGAGCAGAAACAGGAGCAGGA | 22 | 0  | RDR2-resistant |
| CGACGAGCTAGAACTGCGGCGGAG | 0  | 13 | RDR2-sensitive |
| CGACGAGCTAGATCTGCGACGGAG | 0  | 10 | RDR2-sensitive |
| CGACGAGGACGCCGCAACATCGC  | 6  | 23 | RDR2-sensitive |

|                          |     |    |                |
|--------------------------|-----|----|----------------|
| CGACGATGCGGCGCAGCAGGACGA | 0   | 10 | RDR2-sensitive |
| CGACGCAACGACGAACGACGACGA | 0   | 17 | RDR2-sensitive |
| CGACGCACTGAAGTTCAACGACGG | 0   | 10 | RDR2-sensitive |
| CGACGCACTGGCACAGACGAAGAC | 0   | 9  | RDR2-sensitive |
| CGACGCCATGTCAGAGCTCGGCGC | 0   | 12 | RDR2-sensitive |
| CGACGCCTACCGCTCTGACGGCGA | 1   | 24 | RDR2-sensitive |
| CGACGCGACTGACGGATAAGCCAA | 0   | 49 | RDR2-sensitive |
| CGACGCGGAAACGAGCATGCTGGC | 0   | 13 | RDR2-sensitive |
| CGACGCGGCGTATGAGATGGACGG | 0   | 12 | RDR2-sensitive |
| CGACGCGTAGAGGGCGCTGTAGGG | 0   | 11 | RDR2-sensitive |
| CGACGCTGGAGCCAACGACGACAT | 0   | 23 | RDR2-sensitive |
| CGACGGAAGCACACTGAGAAGCAG | 0   | 13 | RDR2-sensitive |
| CGACGGAAGGTGTTGCTAGTAGAA | 0   | 9  | RDR2-sensitive |
| CGACGGACTGGACGAGTGCACGG  | 0   | 13 | RDR2-sensitive |
| CGACGGAGACGGATATGGATACAT | 1   | 70 | RDR2-sensitive |
| CGACGGAGACTGAGCCAGACGGAT | 0   | 59 | RDR2-sensitive |
| CGACGGAGCCGGATATGGATACAT | 2   | 87 | RDR2-sensitive |
| CGACGGAGCCGGGTATGAATACAT | 0   | 17 | RDR2-sensitive |
| CGACGGAGGCTGAGTCAGACGTGT | 0   | 13 | RDR2-sensitive |
| CGACGGAGGGGAAGGCAGGGCAGC | 43  | 2  | RDR2-resistant |
| CGACGGATGCGGCTTCGACGAAAT | 0   | 23 | RDR2-sensitive |
| CGACGGATGCTAGTAGAATGGCAT | 0   | 33 | RDR2-sensitive |
| CGACGGCAGTGTCTTATCTCCGAC | 0   | 13 | RDR2-sensitive |
| CGACGGCCACGACATCACATGAAC | 6   | 22 | RDR2-sensitive |
| CGACGGCCTCCTTATCTCCGACGG | 0   | 10 | RDR2-sensitive |
| CGACGGCCTTCAGCTTGACGACGA | 0   | 9  | RDR2-sensitive |
| CGACGGCGGCTTGCGGAGGGCGAG | 23  | 0  | RDR2-resistant |
| CGACGGCTGTCAGGGATGAGTCAT | 0   | 9  | RDR2-sensitive |
| CGACGGGAACGGCTACGAATACAG | 0   | 12 | RDR2-sensitive |
| CGACGGGAGCTACGAGCAGCAGAC | 0   | 9  | RDR2-sensitive |
| CGACGGGCTGCCTGCACACATGGC | 0   | 13 | RDR2-sensitive |
| CGACGGGGCATTGTAAGTGGCAGA | 298 | 39 | RDR2-resistant |
| CGACGGTAGCCGCAGCCTTGACGA | 0   | 9  | RDR2-sensitive |
| CGACGGTCTGCTCGTGGAAGTCGC | 0   | 13 | RDR2-sensitive |
| CGACGGTCTGTAACCTAGGCACAG | 0   | 14 | RDR2-sensitive |
| CGACGGTGCCGAGTGGAAGGGACG | 0   | 14 | RDR2-sensitive |
| CGACGGTGCTCTCTGCACAGACGC | 0   | 21 | RDR2-sensitive |
| CGACGGTGCTCTCTGCACAGGCGT | 1   | 34 | RDR2-sensitive |
| CGACGGTGCTCTCTGGTCAGGCGC | 1   | 19 | RDR2-sensitive |
| CGACGGTTTCTGCAGACGGGTTGG | 0   | 13 | RDR2-sensitive |
| CGACGGTTTTACTGAGAGCGGCAT | 0   | 9  | RDR2-sensitive |
| CGACGTAGACCAAGAGGGCTTCTC | 1   | 23 | RDR2-sensitive |
| CGACGTAGAGCCGAAGAGAAGCGA | 0   | 26 | RDR2-sensitive |
| CGACGTAGAGCCGAAGAGAGACGA | 1   | 94 | RDR2-sensitive |
| CGACGTAGAGCCGAAGAGAGGTGA | 0   | 26 | RDR2-sensitive |
| CGACGTAGCGCCCTTGACAACGGT | 0   | 31 | RDR2-sensitive |
| CGACGTAGGCTGAACCGGTATCAC | 0   | 12 | RDR2-sensitive |
| CGACGTCATGGGGTTGAAGATGAG | 35  | 1  | RDR2-resistant |
| CGACGTGCGGACTGCAGAGACGGT | 0   | 14 | RDR2-sensitive |

|                           |    |    |                |
|---------------------------|----|----|----------------|
| CGACGTGGAACCGAGCTCGGCGCC  | 9  | 65 | RDR2-sensitive |
| CGACGTGGACATCACGAACGGCGA  | 0  | 11 | RDR2-sensitive |
| CGACGTGGACGCATATGGAAGCAG  | 0  | 9  | RDR2-sensitive |
| CGACGTGGACGCATGTAGGAGCGG  | 0  | 29 | RDR2-sensitive |
| CGACGTTGAACCGGCTGCTCTCAG  | 0  | 22 | RDR2-sensitive |
| CGACGTTGACTGACTGCTCGGCAT  | 3  | 16 | RDR2-sensitive |
| CGACGTTGAGCTGAGTGGGGGCAC  | 0  | 10 | RDR2-sensitive |
| CGACGTTGGGCTGAGTGGAGGCAC  | 0  | 25 | RDR2-sensitive |
| CGACGTTTTGAGATCTTTAGTGTC  | 22 | 1  | RDR2-resistant |
| CGACTACTCTGGGCCAGCAACAGC  | 0  | 13 | RDR2-sensitive |
| CGACTACTTAGGAACATGGCTCAC  | 0  | 9  | RDR2-sensitive |
| CGACTAGAGACGTACTGCGCGGCC  | 0  | 13 | RDR2-sensitive |
| CGACTATTTTGTTCGATCCGAGGCA | 39 | 3  | RDR2-resistant |
| CGACTATTTTGTTCGATCCGTGGCA | 33 | 0  | RDR2-resistant |
| CGACTCATGGCATAACTCGGCTAG  | 0  | 11 | RDR2-sensitive |
| CGACTCCGGCAGCGGCTCTAGTAT  | 0  | 9  | RDR2-sensitive |
| CGACTCCTCCAACGCGGTCGTCGA  | 1  | 26 | RDR2-sensitive |
| CGACTCCTGGCAGAACCGTGCACC  | 0  | 9  | RDR2-sensitive |
| CGACTCGACTCGAAGGTGGCTCGT  | 0  | 24 | RDR2-sensitive |
| CGACTCGTAGTGCTTCGGCATGGC  | 0  | 10 | RDR2-sensitive |
| CGACTCGTTCTAACTCGGCGGCAA  | 1  | 16 | RDR2-sensitive |
| CGACTCTACGTCGTCTAGATCCGT  | 1  | 13 | RDR2-sensitive |
| CGACTCTAGGCCACGGACCGTCTG  | 0  | 9  | RDR2-sensitive |
| CGACTCTCGGCAACGGATATCTCG  | 22 | 2  | RDR2-resistant |
| CGACTCTGACAACGGAGGACTCGC  | 0  | 9  | RDR2-sensitive |
| CGACTCTGTCAGGAACGGAAGTGG  | 0  | 9  | RDR2-sensitive |
| CGACTCTTGCGGTGACTCGGCGAC  | 2  | 27 | RDR2-sensitive |
| CGACTGAAGAGCGCGCGTCAGGAT  | 1  | 12 | RDR2-sensitive |
| CGACTGAATCAGGACCATCGTTCGT | 0  | 13 | RDR2-sensitive |
| CGACTGACACTCGGCAAAGAGGCT  | 1  | 17 | RDR2-sensitive |
| CGACTGACCAAATTGCAGGGGCAT  | 1  | 18 | RDR2-sensitive |
| CGACTGACCCTAGAAGAAGCACAG  | 0  | 26 | RDR2-sensitive |
| CGACTGCAAATATACAGAGGGCAT  | 0  | 12 | RDR2-sensitive |
| CGACTGCAGCGAGAGACGACGAGC  | 0  | 9  | RDR2-sensitive |
| CGACTGCATCCTCATCAACGTCGG  | 0  | 10 | RDR2-sensitive |
| CGACTGCATGGCTGACGCAAGCAC  | 0  | 15 | RDR2-sensitive |
| CGACTGCCGACGCTACACACTGAC  | 0  | 15 | RDR2-sensitive |
| CGACTGCGGCTGCGGCTTCTACAG  | 0  | 39 | RDR2-sensitive |
| CGACTGCGTACGACTACATCGAAC  | 1  | 29 | RDR2-sensitive |
| CGACTGCTAGGAGCCTAAGACGAT  | 0  | 13 | RDR2-sensitive |
| CGACTGCTAGGAGCCTAGGACGAC  | 0  | 10 | RDR2-sensitive |
| CGACTGGAACAGGAACGAAGACGT  | 0  | 68 | RDR2-sensitive |
| CGACTGGAAGGTATACACACGCAC  | 51 | 1  | RDR2-resistant |
| CGACTGGACGGAGACCTACCTGGT  | 0  | 9  | RDR2-sensitive |
| CGACTGGACGTACCTGGAAGGCGC  | 0  | 46 | RDR2-sensitive |
| CGACTGGAGACGGCGAGCGTCCAC  | 2  | 18 | RDR2-sensitive |
| CGACTGGAGCAGGAGCACAACCTAT | 0  | 15 | RDR2-sensitive |
| CGACTGGCTGAGGAGGGTGGAGAC  | 0  | 13 | RDR2-sensitive |
| CGACTGTAATGGAGGGCAAGGCGC  | 0  | 28 | RDR2-sensitive |

|                           |    |     |                |
|---------------------------|----|-----|----------------|
| CGACTGTACGAGTGCGGATTTGAT  | 0  | 10  | RDR2-sensitive |
| CGACTGTAGCTAAATGGTTCGTGC  | 0  | 9   | RDR2-sensitive |
| CGACTGTAGCTCGATGGTTCGTGC  | 0  | 14  | RDR2-sensitive |
| CGACTGTATTTTAGCGTAGGCGAA  | 0  | 19  | RDR2-sensitive |
| CGACTGTATTTTAGCGTAGGTGAA  | 0  | 11  | RDR2-sensitive |
| CGACTGTCTAGACCGCTACGCCAG  | 0  | 13  | RDR2-sensitive |
| CGACTGTGAACGACGCAACGACGA  | 0  | 17  | RDR2-sensitive |
| CGACTGTGCACCTGGGCTACGGCC  | 0  | 15  | RDR2-sensitive |
| CGACTGTGGCAGCCACAACGGCGT  | 0  | 17  | RDR2-sensitive |
| CGACTGTGGGGGCAGATATCACTC  | 0  | 11  | RDR2-sensitive |
| CGACTGTTCCGACGGAAGCCGCAG  | 0  | 11  | RDR2-sensitive |
| CGACTGTTCCGACGGTAGCCGCAG  | 4  | 39  | RDR2-sensitive |
| CGACTGTTCCCTGACGGGCTGGCT  | 0  | 12  | RDR2-sensitive |
| CGACTGTTCCGGCGTGCATAGACAT | 0  | 19  | RDR2-sensitive |
| CGACTGTTCTGACGGTAGCCGCAG  | 0  | 17  | RDR2-sensitive |
| CGACTGTTGACTGGGCGCGGGCT   | 0  | 9   | RDR2-sensitive |
| CGACTGTTGGCACTCGGCAAAGAC  | 3  | 35  | RDR2-sensitive |
| CGACTGTTTAGGAAGCCGTCGGAC  | 0  | 14  | RDR2-sensitive |
| CGACTTAAAACGCGACGGGGCATT  | 61 | 15  | RDR2-resistant |
| CGACTTATGGCGTGACTCGGCAAG  | 0  | 10  | RDR2-sensitive |
| CGACTTATGGCGTGACTCGGCGAG  | 0  | 18  | RDR2-sensitive |
| CGACTTCGTACGGCTACATCGAAC  | 1  | 125 | RDR2-sensitive |
| CGACTTCGTGTGGGCAGGGCTGGC  | 41 | 1   | RDR2-resistant |
| CGACTTCGTTGATCTTCCGGCGTC  | 24 | 0   | RDR2-resistant |
| CGACTTCTATACGGATCGGAGGCC  | 58 | 0   | RDR2-resistant |
| CGACTTCTTAGGACGGCAGTAGAG  | 0  | 9   | RDR2-sensitive |
| CGACTTGTAGATCGGTGTCCGAAA  | 0  | 14  | RDR2-sensitive |
| CGACTTGTGGGTAAAGATGCGCAA  | 0  | 14  | RDR2-sensitive |
| CGACTTTAGACGCGGACCGTCCAG  | 2  | 17  | RDR2-sensitive |
| CGACTTTGACTCGACCTGACGGTT  | 1  | 20  | RDR2-sensitive |
| CGAGAAAACCTCCCGGTGCGTCAC  | 0  | 13  | RDR2-sensitive |
| CGAGAACCGACCGGCTCGACCCTT  | 66 | 2   | RDR2-resistant |
| CGAGAACTCTACTGCCGACTGCAC  | 0  | 80  | RDR2-sensitive |
| CGAGAACTCTACTGTGCGACTGCAC | 0  | 20  | RDR2-sensitive |
| CGAGAAGACCAGAGGAGCGACGAC  | 0  | 19  | RDR2-sensitive |
| CGAGAATATGCATGGACACGACAT  | 0  | 9   | RDR2-sensitive |
| CGAGACAACACAACCTCGGCGTCAT | 0  | 9   | RDR2-sensitive |
| CGAGACACCACCTCTGAGCGTCGT  | 0  | 21  | RDR2-sensitive |
| CGAGACAGTGTAAAGACGGAGACAG | 0  | 213 | RDR2-sensitive |
| CGAGACAGTGTAAAGATGGAGACAG | 0  | 57  | RDR2-sensitive |
| CGAGACATATTACCTCGGTGTCGT  | 0  | 11  | RDR2-sensitive |
| CGAGACATGTTAGCTCGACGTCAC  | 0  | 16  | RDR2-sensitive |
| CGAGACCAACAGGGCGGAGCTGGC  | 0  | 13  | RDR2-sensitive |
| CGAGACCCGTGAGCCCGGCATGAA  | 0  | 11  | RDR2-sensitive |
| CGAGACGATCTGAGCCGAGCCGAG  | 0  | 13  | RDR2-sensitive |
| CGAGACGGACTGAGCTGAGGCGAC  | 0  | 16  | RDR2-sensitive |
| CGAGACGGCGTCAGATTCTCCTTC  | 0  | 9   | RDR2-sensitive |
| CGAGACGGGGTGACCGAACGACGA  | 0  | 16  | RDR2-sensitive |
| CGAGACGGTTGCACGAGACAGTGT  | 0  | 10  | RDR2-sensitive |

|                            |    |    |                |
|----------------------------|----|----|----------------|
| CGAGACGTGCTAGGCTAAGATCGG   | 0  | 15 | RDR2-sensitive |
| CGAGACGTGTAACCTCGGCGCCAA   | 0  | 12 | RDR2-sensitive |
| CGAGACGTGTAACCTCGGCGTCAA   | 0  | 17 | RDR2-sensitive |
| CGAGACTAGGACGGCTGCAGTTGC   | 0  | 9  | RDR2-sensitive |
| CGAGACTCTGTCTTCGTAGGACGG   | 0  | 9  | RDR2-sensitive |
| CGAGACTGATCTGCATGCACGTAC   | 0  | 16 | RDR2-sensitive |
| CGAGACTGCATGCGTGGACGTGAC   | 0  | 35 | RDR2-sensitive |
| CGAGACTGGACCGGCCCGACACGA   | 0  | 10 | RDR2-sensitive |
| CGAGACTGGAGGCAGAACACGACG   | 0  | 10 | RDR2-sensitive |
| CGAGACTGGGGTCTTAAGCCGAC    | 0  | 10 | RDR2-sensitive |
| CGAGACTGGTGAAGGACGCGGCAG   | 0  | 10 | RDR2-sensitive |
| CGAGACTGTTGGGAGCAAGGAGGA   | 42 | 8  | RDR2-resistant |
| CGAGACTTCGGATGGCCGCTAGGT   | 21 | 1  | RDR2-resistant |
| CGAGACTTTGTGCGAGTGTGGCAT   | 2  | 19 | RDR2-sensitive |
| CGAGAGACCTGACTGACGAGCGAC   | 0  | 17 | RDR2-sensitive |
| CGAGAGAGGACGTCAGGGGACGAT   | 0  | 13 | RDR2-sensitive |
| CGAGAGCTCTCGTAGACACTCGGC   | 1  | 19 | RDR2-sensitive |
| CGAGAGCTGGCCGACTCATGGCAT   | 2  | 15 | RDR2-sensitive |
| CGAGAGCTGTTTGGCGACGAGCAT   | 0  | 10 | RDR2-sensitive |
| CGAGAGGAACCCGAAGATGAGCGT   | 0  | 12 | RDR2-sensitive |
| CGAGAGGAGGCTAGGAACAGACAG   | 0  | 12 | RDR2-sensitive |
| CGAGAGGGTGTAGGATGCGATGGT   | 25 | 3  | RDR2-resistant |
| CGAGAGTCTGTCTCTGTGCTGTGT   | 0  | 12 | RDR2-sensitive |
| CGAGATCGCGGTCCACGGACGGGC   | 0  | 20 | RDR2-sensitive |
| CGAGATCGCTGCCAGAATGTCGT    | 0  | 11 | RDR2-sensitive |
| CGAGATCGCTGGAAGGCAGAACGG   | 0  | 12 | RDR2-sensitive |
| CGAGATCGGACGGCTTGATGGCC    | 20 | 2  | RDR2-resistant |
| CGAGATCGGGCTTGACAGACGGGT   | 0  | 10 | RDR2-sensitive |
| CGAGATCTCCGAGCGGTTGCACGT   | 0  | 13 | RDR2-sensitive |
| CGAGATCTCTGGGCAGTTGCACGT   | 0  | 30 | RDR2-sensitive |
| CGAGATCTGGAACAGGCTCGACGA   | 0  | 17 | RDR2-sensitive |
| CGAGATGAAGACGCCAAGAACCAG   | 0  | 11 | RDR2-sensitive |
| CGAGATGAAGACGCCAGGAACCAG   | 1  | 32 | RDR2-sensitive |
| CGAGATGCAGGGCCTGGCACCGAC   | 17 | 0  | RDR2-resistant |
| CGAGATGCGCGAGGACGACAGCAC   | 0  | 10 | RDR2-sensitive |
| CGAGATGTGCGACGAGCTGGGGCC   | 56 | 1  | RDR2-resistant |
| CGAGATGTGTAAACTCGGCGCCAT   | 0  | 19 | RDR2-sensitive |
| CGAGATGTGTAAACTCGGCGTCAT   | 0  | 9  | RDR2-sensitive |
| CGAGATGTGTTACCTCGGCGCCAT   | 0  | 9  | RDR2-sensitive |
| CGAGATGTGTTAGCTCGGCGTCAT   | 0  | 19 | RDR2-sensitive |
| CGAGATGTGTTATCTTGACGTCGT   | 0  | 9  | RDR2-sensitive |
| CGAGATTAAGCTTAGGGCGGTGAGAA | 0  | 9  | RDR2-sensitive |
| CGAGCAAAGCGGACCGGTAAGCAT   | 0  | 27 | RDR2-sensitive |
| CGAGCAACGGGCAACGGATGAGGT   | 45 | 5  | RDR2-resistant |
| CGAGCAACTCTGCGAGACGGACTA   | 0  | 10 | RDR2-sensitive |
| CGAGCACACGGACTTAGATGGCCC   | 0  | 11 | RDR2-sensitive |
| CGAGCACGGACCGAAGTATGCTAC   | 17 | 0  | RDR2-resistant |
| CGAGCACGGACTGGACCGGCCCGA   | 0  | 14 | RDR2-sensitive |
| CGAGCAGACTGTGTTGCCGGTATG   | 0  | 9  | RDR2-sensitive |

|                           |    |    |                |
|---------------------------|----|----|----------------|
| CGAGCAGAGGGCGACTGAGGGCGT  | 0  | 17 | RDR2-sensitive |
| CGAGCAGCAGACCTCGATGAACCT  | 0  | 16 | RDR2-sensitive |
| CGAGCAGGGCTACGGCGTGAACAA  | 0  | 9  | RDR2-sensitive |
| CGAGCATAGTGGCCTGATGAGCAT  | 0  | 12 | RDR2-sensitive |
| CGAGCCAAGTAGAGCCGAGCTGAA  | 0  | 14 | RDR2-sensitive |
| CGAGCCAGCTCGAACTCGGACGAG  | 0  | 14 | RDR2-sensitive |
| CGAGCCCGC GGACTTAGACGGTGT | 0  | 38 | RDR2-sensitive |
| CGAGCCCGGCACGGTAGAATAAGC  | 0  | 11 | RDR2-sensitive |
| CGAGCCGCTGTAGGTTGTGCGGTT  | 4  | 25 | RDR2-sensitive |
| CGAGCCGGACCAGGTCCAGACGTC  | 4  | 35 | RDR2-sensitive |
| CGAGCCGGAGGCGAGATGGACTAT  | 0  | 22 | RDR2-sensitive |
| CGAGCCGTGTTAACTCGACGTCAT  | 0  | 19 | RDR2-sensitive |
| CGAGCCTGATCGAGCCCGAGCCGG  | 0  | 22 | RDR2-sensitive |
| CGAGCGCTGAACACTCGGCACAGA  | 0  | 13 | RDR2-sensitive |
| CGAGCGGACGAAGCGAGCAGTCGC  | 0  | 11 | RDR2-sensitive |
| CGAGCGGATGCAGTCAATTGGCCT  | 0  | 12 | RDR2-sensitive |
| CGAGCGGATGCGCGAGTGAATGAG  | 0  | 9  | RDR2-sensitive |
| CGAGCGGATGGACGTCAAACAGGA  | 0  | 11 | RDR2-sensitive |
| CGAGCGGGCTGCGAGGGCATAGAG  | 28 | 0  | RDR2-resistant |
| CGAGCGGGCTGGGAACGGAGCGGC  | 6  | 35 | RDR2-sensitive |
| CGAGCGGGTGGACGACTTCGGGGC  | 17 | 1  | RDR2-resistant |
| CGAGCTAACGGGCTGTCTCGGCAC  | 0  | 18 | RDR2-sensitive |
| CGAGCTAAGCCGACTCGTGAGCCT  | 0  | 9  | RDR2-sensitive |
| CGAGCTACAACGTGTGCGCGCCAA  | 0  | 14 | RDR2-sensitive |
| CGAGCTAGACGGTCTGCGCCTGAT  | 0  | 11 | RDR2-sensitive |
| CGAGCTAGCACAGCCCGAAGTCGG  | 0  | 13 | RDR2-sensitive |
| CGAGCTAGCATGACTCGAAGTCGG  | 1  | 13 | RDR2-sensitive |
| CGAGCTATGTAAACTCGGCGTCAT  | 0  | 16 | RDR2-sensitive |
| CGAGCTCCTGCACCAGGTGCGGGA  | 0  | 11 | RDR2-sensitive |
| CGAGCTCGACTCGGCTCTGCTCGG  | 0  | 9  | RDR2-sensitive |
| CGAGCTCGGACACGTGACGTCGT   | 0  | 16 | RDR2-sensitive |
| CGAGCTCGGTACCACGTGACGCC   | 0  | 9  | RDR2-sensitive |
| CGAGCTCGGTGCCACGTGACGCC   | 0  | 12 | RDR2-sensitive |
| CGAGCTCTGACATGGCAGCGACGG  | 0  | 10 | RDR2-sensitive |
| CGAGCTCTGACGTAGCAGCCACGT  | 1  | 17 | RDR2-sensitive |
| CGAGCTCTGACGTGGCCGCAACGG  | 0  | 24 | RDR2-sensitive |
| CGAGCTCTGACGTGGCGACGACAG  | 0  | 22 | RDR2-sensitive |
| CGAGCTCTGACGTGGCGACGGGAG  | 0  | 11 | RDR2-sensitive |
| CGAGCTGACCATGAAACGAGCGAG  | 0  | 20 | RDR2-sensitive |
| CGAGCTGACCATGAACCAAGCGAG  | 0  | 31 | RDR2-sensitive |
| CGAGCTGACCATGAACCGAGCGAG  | 0  | 49 | RDR2-sensitive |
| CGAGCTGACCCTGAAACGAGCGAG  | 0  | 74 | RDR2-sensitive |
| CGAGCTGACTATGAACCGAGCGAG  | 0  | 10 | RDR2-sensitive |
| CGAGCTGAGCCGAGTAGAGCCGAG  | 0  | 10 | RDR2-sensitive |
| CGAGCTGATGGACATCGCCACCAA  | 2  | 15 | RDR2-sensitive |
| CGAGCTGGACCGAGCCC GACTCAT | 0  | 10 | RDR2-sensitive |
| CGAGCTGTATTACCTCGGCGCCGT  | 1  | 19 | RDR2-sensitive |
| CGAGCTGTATTACCTCGGCGTCAT  | 0  | 58 | RDR2-sensitive |
| CGAGCTGTCGGCACCATCTTTCCT  | 0  | 24 | RDR2-sensitive |

|                          |    |     |                |
|--------------------------|----|-----|----------------|
| CGAGCTGTGGCATGGTATACTGAG | 0  | 12  | RDR2-sensitive |
| CGAGCTGTGTGACGTGGCAGTCTG | 0  | 21  | RDR2-sensitive |
| CGAGCTGTGTTAACTCGGCGCCAT | 0  | 11  | RDR2-sensitive |
| CGAGCTGTGTTAACTCGGCGTCAT | 0  | 19  | RDR2-sensitive |
| CGAGCTGTGTTACATCGACGCCAT | 1  | 50  | RDR2-sensitive |
| CGAGCTGTGTTACCTAGGCGCCAT | 0  | 23  | RDR2-sensitive |
| CGAGCTGTGTTACCTCGACGCCAT | 1  | 26  | RDR2-sensitive |
| CGAGCTGTGTTACCTCGACGTCAT | 0  | 69  | RDR2-sensitive |
| CGAGCTGTGTTACCTCGGCGCCAC | 2  | 128 | RDR2-sensitive |
| CGAGCTGTGTTACCTCGGCGCCAT | 15 | 228 | RDR2-sensitive |
| CGAGCTGTGTTACCTCGGCGCCCT | 1  | 15  | RDR2-sensitive |
| CGAGCTGTGTTACCTCGGCGCCGA | 0  | 19  | RDR2-sensitive |
| CGAGCTGTGTTACCTCGGCGCCGT | 0  | 17  | RDR2-sensitive |
| CGAGCTGTGTTACCTCGGCGTCAC | 1  | 21  | RDR2-sensitive |
| CGAGCTGTGTTACCTCGGCGTCAT | 2  | 78  | RDR2-sensitive |
| CGAGCTGTGTTACCTCGGCGTCGT | 2  | 35  | RDR2-sensitive |
| CGAGCTGTGTTACCTTGGCGCCAT | 0  | 9   | RDR2-sensitive |
| CGAGCTGTGTTACTTCGACGCCAT | 0  | 10  | RDR2-sensitive |
| CGAGCTGTGTTACTTCGGCGCCAT | 3  | 41  | RDR2-sensitive |
| CGAGCTGTGTTATCTTGGCGTCAT | 0  | 19  | RDR2-sensitive |
| CGAGCTTGGACTGCGGCGTAGGCC | 0  | 17  | RDR2-sensitive |
| CGAGGAACCGAACCGAACCGAAGA | 0  | 14  | RDR2-sensitive |
| CGAGGAACGAGGAACACGGTACGT | 0  | 15  | RDR2-sensitive |
| CGAGGAACTCGCAGGAGAAGCCCC | 0  | 11  | RDR2-sensitive |
| CGAGGAAGCTGCCGAGGACGTCGT | 1  | 21  | RDR2-sensitive |
| CGAGGAATCTGTCAAGGACGTCGG | 0  | 12  | RDR2-sensitive |
| CGAGGAATGACGTGGCAGCAACAG | 0  | 9   | RDR2-sensitive |
| CGAGGACAACGACAAGGACGAGCT | 0  | 13  | RDR2-sensitive |
| CGAGGACAGTGTTGAAGACGACGA | 0  | 17  | RDR2-sensitive |
| CGAGGACATAGCTGTGGGCTGGCT | 0  | 19  | RDR2-sensitive |
| CGAGGACCGAGGACATCGACGGAG | 0  | 13  | RDR2-sensitive |
| CGAGGACCGATCTGAACAGGGCAT | 0  | 13  | RDR2-sensitive |
| CGAGGACGACGCTGCGGACGGGCT | 0  | 22  | RDR2-sensitive |
| CGAGGACGCTGGCAAGGAACACGG | 12 | 43  | RDR2-sensitive |
| CGAGGACGGGGAACAGGCTACCAT | 1  | 63  | RDR2-sensitive |
| CGAGGACGTAAAGGACGCCGCGT  | 0  | 9   | RDR2-sensitive |
| CGAGGACGTGGACGGCACCGACGA | 0  | 12  | RDR2-sensitive |
| CGAGGACTAGACCAGTGGACTGCT | 0  | 13  | RDR2-sensitive |
| CGAGGACTAGGCCCATAGGCCGGC | 0  | 9   | RDR2-sensitive |
| CGAGGACTAGTGGAGAGTGCGGAC | 0  | 11  | RDR2-sensitive |
| CGAGGACTGAACCGAGTAGGACGA | 0  | 30  | RDR2-sensitive |
| CGAGGACTGGGGGCATGGTGATGC | 0  | 10  | RDR2-sensitive |
| CGAGGACTGTGGCGTCATCTTGGC | 3  | 34  | RDR2-sensitive |
| CGAGGAGACCGTAGCAGAGACTGT | 0  | 18  | RDR2-sensitive |
| CGAGGAGCTCTGTCCAGCTGCAGA | 22 | 0   | RDR2-resistant |
| CGAGGATAGACTCAGGCAAGGCGT | 0  | 11  | RDR2-sensitive |
| CGAGGATTGTGGCGTCATCTTGGC | 0  | 28  | RDR2-sensitive |
| CGAGGCACCGAACTCAGGATCCGG | 0  | 14  | RDR2-sensitive |
| CGAGGCAGAACTAGTGGAGGCATA | 0  | 10  | RDR2-sensitive |

|                           |     |    |                |
|---------------------------|-----|----|----------------|
| CGAGGCGGGAACCAGCAGAACGTG  | 0   | 10 | RDR2-sensitive |
| CGAGGCTACGGCTACCGTCGGAAC  | 0   | 15 | RDR2-sensitive |
| CGAGGCTAGGCTCGGGTGAAGCGT  | 7   | 26 | RDR2-sensitive |
| CGAGGCTGCGGCTACCGTCGGAAC  | 5   | 26 | RDR2-sensitive |
| CGAGGGAAGCATGGTATAGCTCAC  | 0   | 16 | RDR2-sensitive |
| CGAGGGACCTGCCGGCTTGATGGA  | 0   | 16 | RDR2-sensitive |
| CGAGGGACTGCACTCTGTCCGCAT  | 0   | 20 | RDR2-sensitive |
| CGAGGGAGTTCTCGAGGACGTCGT  | 0   | 21 | RDR2-sensitive |
| CGAGGGATGGGTGCTCGTTTGGTC  | 17  | 0  | RDR2-resistant |
| CGAGGGCTAGACATGTGGGCCGGT  | 0   | 11 | RDR2-sensitive |
| CGAGGGCTGACGCGGTGCCATCGT  | 0   | 13 | RDR2-sensitive |
| CGAGGGGCGTAGAACGGGCGGCGT  | 0   | 15 | RDR2-sensitive |
| CGAGGGGCTGGACGCGCTTCCCAG  | 4   | 18 | RDR2-sensitive |
| CGAGGGTAATCTCGGACGAGTGAC  | 0   | 17 | RDR2-sensitive |
| CGAGGGTAGATCTGAGCAAGACGT  | 0   | 11 | RDR2-sensitive |
| CGAGGGTAGATTTGAGCAGAGCGT  | 0   | 9  | RDR2-sensitive |
| CGAGGGTGCATGCGGCTGATGAGC  | 15  | 0  | RDR2-resistant |
| CGAGGTAACACAGCTCGACGCCAT  | 2   | 53 | RDR2-sensitive |
| CGAGGTAACACAGCTCGACGTCAT  | 0   | 30 | RDR2-sensitive |
| CGAGGTAACACAGCTCGGCGCCAC  | 0   | 33 | RDR2-sensitive |
| CGAGGTAACACAGCTCGGCGCCAT  | 2   | 86 | RDR2-sensitive |
| CGAGGTAACACAGCTCGGCGTCAT  | 0   | 10 | RDR2-sensitive |
| CGAGGTAACACAGCTCGGCGTCGT  | 0   | 21 | RDR2-sensitive |
| CGAGGTAACACATGTCCGCGCCAT  | 0   | 17 | RDR2-sensitive |
| CGAGGTAACACTGTTCCGACGTCAC | 1   | 19 | RDR2-sensitive |
| CGAGGTACGGCTTGACGTCTGGGA  | 0   | 16 | RDR2-sensitive |
| CGAGGTAGAGCGTGCTGATAACGT  | 0   | 32 | RDR2-sensitive |
| CGAGGTCCTGTAGCTGGCGGGCGC  | 119 | 29 | RDR2-resistant |
| CGAGGTCCGAGCTCATGGACGGAC  | 0   | 11 | RDR2-sensitive |
| CGAGGTCTGACGTGGCAACGACGG  | 0   | 17 | RDR2-sensitive |
| CGAGGTCTGACGTGGCAGCAACGG  | 1   | 32 | RDR2-sensitive |
| CGAGGTGAGAGGGCAGAACATGGT  | 0   | 11 | RDR2-sensitive |
| CGAGGTGCTTTTGGGTAGGACGGT  | 0   | 16 | RDR2-sensitive |
| CGAGGTTGGTCTTGACAAGGCGT   | 0   | 38 | RDR2-sensitive |
| CGAGTAGAGCCGAGCTGAAATCGA  | 0   | 21 | RDR2-sensitive |
| CGAGTATTGTTTTGGTGAGTCTGG  | 14  | 0  | RDR2-resistant |
| CGAGTCAAGCCGAGCTACTAACGA  | 0   | 11 | RDR2-sensitive |
| CGAGTCGAATCTACTGTTGTGGCT  | 0   | 18 | RDR2-sensitive |
| CGAGTCGAGACTGCTTTTGTGGCT  | 0   | 9  | RDR2-sensitive |
| CGAGTCGAGCCGAGCTACTAACGA  | 1   | 17 | RDR2-sensitive |
| CGAGTCGGTATCACAGTAGGAGAA  | 0   | 21 | RDR2-sensitive |
| CGAGTCGTGGACTGACCCAGGCGT  | 0   | 11 | RDR2-sensitive |
| CGAGTCGTGGACTGACCGAGGCAT  | 0   | 9  | RDR2-sensitive |
| CGAGTCTGTGTGTGCCGGCGCCAA  | 0   | 9  | RDR2-sensitive |
| CGAGTGCAAGTAGATACTCGGCAA  | 0   | 12 | RDR2-sensitive |
| CGAGTGCACTGCCATGGACGTCAT  | 0   | 16 | RDR2-sensitive |
| CGAGTGCGGCACTCGGCAAAGCCT  | 0   | 10 | RDR2-sensitive |
| CGAGTGGACGAAGAGTGATGGCCT  | 0   | 15 | RDR2-sensitive |
| CGAGTGGATTATGTGAACAGGTAT  | 0   | 43 | RDR2-sensitive |



|                           |    |    |                |
|---------------------------|----|----|----------------|
| CGAGTGGGATGTATGTGACGACAT  | 0  | 16 | RDR2-sensitive |
| CGAGTGGTAGACAGGGATGGATAA  | 0  | 9  | RDR2-sensitive |
| CGAGTGGTAGACAGGGTTGGATAA  | 1  | 16 | RDR2-sensitive |
| CGAGTGGTAGATAGGGTTGGATAA  | 0  | 21 | RDR2-sensitive |
| CGAGTGTCAGGCAGTACTCGGCAA  | 0  | 10 | RDR2-sensitive |
| CGAGTGTCAGTCGGTACTCGGCAA  | 0  | 10 | RDR2-sensitive |
| CGAGTGTCAGTCGGTCCTCGGCAA  | 0  | 11 | RDR2-sensitive |
| CGAGTGTTGGGCTAGGGACGGATAG | 1  | 13 | RDR2-sensitive |
| CGAGTTAGGGTTAGAGAACGGCGT  | 0  | 21 | RDR2-sensitive |
| CGAGTTGTAGAGCACGATGGCGTC  | 0  | 11 | RDR2-sensitive |
| CGAGTTTCTTTCGGGTCGGGCTAA  | 0  | 32 | RDR2-sensitive |
| CGATAAAAACGGGGCAAGGGACGG  | 0  | 13 | RDR2-sensitive |
| CGATAAGTTCGACGGTTTTACCAC  | 0  | 9  | RDR2-sensitive |
| CGATACCAGCTGTGACGGAACCTC  | 2  | 55 | RDR2-sensitive |
| CGATACCTGGTGTGAATTGCAGAA  | 20 | 0  | RDR2-resistant |
| CGATAGAACGGACGGTGCAGATGC  | 0  | 9  | RDR2-sensitive |
| CGATAGATGGTAGAACGGCAGGCT  | 0  | 24 | RDR2-sensitive |
| CGATAGGACTACTCGAGTCGGCTT  | 0  | 30 | RDR2-sensitive |
| CGATAGGGCCCTGAGTCGTTGGAG  | 0  | 14 | RDR2-sensitive |
| CGATATAGTAGTCGTCGAACGCAC  | 0  | 15 | RDR2-sensitive |
| CGATATAGTAGTCGTCGAACGCGC  | 0  | 18 | RDR2-sensitive |
| CGATATATTTTCGTCGGCCGGCCC  | 1  | 13 | RDR2-sensitive |
| CGATATATTTTCGTCGGTCGGCCC  | 0  | 37 | RDR2-sensitive |
| CGATATGCGGCATCTCTGGATCGT  | 0  | 15 | RDR2-sensitive |
| CGATATGTGTTAACTCGGCATCAT  | 0  | 18 | RDR2-sensitive |
| CGATATCCCAAGCGCTCGACAA    | 1  | 14 | RDR2-sensitive |
| CGATCACGGTGGAGGACGAGGAGT  | 25 | 0  | RDR2-resistant |
| CGATCACGTCTGACGCAGCGGCAT  | 0  | 9  | RDR2-sensitive |
| CGATCAGACTGCCGGACAGGGCAT  | 0  | 11 | RDR2-sensitive |
| CGATCAGACTGTCCACATGGAGGC  | 0  | 10 | RDR2-sensitive |
| CGATCAGACTTGGGCAGCGTACAA  | 0  | 9  | RDR2-sensitive |
| CGATCAGGCTCGGCTCGGCTCGGT  | 5  | 77 | RDR2-sensitive |
| CGATCAGTGTTACCTTGACGTCAT  | 0  | 9  | RDR2-sensitive |
| CGATCATGCTCGGCTCGGCTCGGT  | 0  | 15 | RDR2-sensitive |
| CGATCATGGCTAGACTGGAGGCGA  | 0  | 14 | RDR2-sensitive |
| CGATCCATCTTGGACCTGTGACGG  | 0  | 12 | RDR2-sensitive |
| CGATCCGATCTGACGATAGGCATG  | 0  | 21 | RDR2-sensitive |
| CGATCCGCGGTCGCTGTTACGGTA  | 0  | 11 | RDR2-sensitive |
| CGATCCGGATCTGCTTGGAGGCGT  | 2  | 19 | RDR2-sensitive |
| CGATCGGACGATCCGCGATGACGC  | 0  | 13 | RDR2-sensitive |
| CGATCGGATTAGCTAGCAGGTCGT  | 0  | 23 | RDR2-sensitive |
| CGATCTAGTCATCGGATTGGTTGT  | 0  | 12 | RDR2-sensitive |
| CGATCTATGGACTCGCGACAGGAG  | 0  | 9  | RDR2-sensitive |
| CGATCTCGTCGTCAAGCTGAAGGC  | 0  | 9  | RDR2-sensitive |
| CGATCTCGTCGTTCGGTCCGTGCAT | 0  | 16 | RDR2-sensitive |
| CGATCTGAACAGGGCATGCCGCTT  | 0  | 9  | RDR2-sensitive |
| CGATCTGAAGTCGGGCGGGCACGG  | 0  | 25 | RDR2-sensitive |
| CGATCTGACGTTCTGGATTGGCGC  | 0  | 26 | RDR2-sensitive |
| CGATCTGTAGTGAACAGGTCAT    | 0  | 9  | RDR2-sensitive |

|                           |     |     |                |
|---------------------------|-----|-----|----------------|
| CGATCTGTATCTGCCACGTGACGC  | 38  | 2   | RDR2-resistant |
| CGATCTGTGGTTCCTAGACGGTAC  | 0   | 19  | RDR2-sensitive |
| CGATGACAAGACACGTGCTGGCAA  | 0   | 11  | RDR2-sensitive |
| CGATGACATACTGGCGAAGCCAC   | 0   | 24  | RDR2-sensitive |
| CGATGACGAACTCCAGGCGCGGAT  | 0   | 10  | RDR2-sensitive |
| CGATGACTCACCAGAACGACGCGC  | 0   | 11  | RDR2-sensitive |
| CGATGACTCGCCAGAACGACGCGC  | 0   | 49  | RDR2-sensitive |
| CGATGACTGGAAGTAGGGACGTTT  | 1   | 45  | RDR2-sensitive |
| CGATGACTGGATGTAGGGACGTTT  | 0   | 19  | RDR2-sensitive |
| CGATGACTGGGCACACGTGCTGAC  | 0   | 22  | RDR2-sensitive |
| CGATGACTGGGCACACGTGCTGGC  | 9   | 180 | RDR2-sensitive |
| CGATGACTGGGCATACGTGCTGGC  | 0   | 11  | RDR2-sensitive |
| CGATGACTGTGTCTCGTGAGGCAG  | 0   | 9   | RDR2-sensitive |
| CGATGAGAACCACGACGTGCGCAC  | 0   | 10  | RDR2-sensitive |
| CGATGAGACTAGAGTAGAGGCCGA  | 0   | 23  | RDR2-sensitive |
| CGATGAGACTGAGGTACGACCACT  | 27  | 0   | RDR2-resistant |
| CGATGAGACTGGAGTAGAAGCCGA  | 0   | 14  | RDR2-sensitive |
| CGATGAGACTGGAGTAGAGGCCGA  | 8   | 156 | RDR2-sensitive |
| CGATGAGACTGGAGTAGGAGCCGA  | 0   | 9   | RDR2-sensitive |
| CGATGCAGTAGATCGGGACGGCAG  | 1   | 14  | RDR2-sensitive |
| CGATGCCCTACTGTAGACGGTCAG  | 3   | 54  | RDR2-sensitive |
| CGATGCCGCGGTGTAGGGATGGGC  | 1   | 33  | RDR2-sensitive |
| CGATGCGACGGTGCACAGGAACAA  | 0   | 9   | RDR2-sensitive |
| CGATGCGACTTGTGGGAAGAGGCT  | 0   | 9   | RDR2-sensitive |
| CGATGCGAGGTAGAGGGTAGGGAA  | 15  | 0   | RDR2-resistant |
| CGATGCGATTGTGGAGACCGTGCT  | 1   | 23  | RDR2-sensitive |
| CGATGCGGCACAGCAGGACGACGA  | 1   | 45  | RDR2-sensitive |
| CGATGCGGCGCAGCAGGACGACGA  | 0   | 23  | RDR2-sensitive |
| CGATGCGTACAGAACAGAGGGCAT  | 0   | 23  | RDR2-sensitive |
| CGATGCTCTCTGTGGACACGCGGA  | 0   | 9   | RDR2-sensitive |
| CGATGGACGGCAGAACGGCAGAAC  | 1   | 30  | RDR2-sensitive |
| CGATGGATCTGTGGGACAGCGGCT  | 0   | 11  | RDR2-sensitive |
| CGATGGCATACTGGCGAAGCCAC   | 0   | 30  | RDR2-sensitive |
| CGATGGCATACTGGCGAAGCTCAT  | 0   | 31  | RDR2-sensitive |
| CGATGGCATACTGGTGAAGCTCAC  | 1   | 85  | RDR2-sensitive |
| CGATGGCGATTGTGGAACAGGCAC  | 0   | 18  | RDR2-sensitive |
| CGATGGGAACATGGACGGCGGGGA  | 10  | 44  | RDR2-sensitive |
| CGATGGGACTCACGTACGGTGCAT  | 0   | 13  | RDR2-sensitive |
| CGATGTGCGAACTCGCGACAGACGA | 0   | 16  | RDR2-sensitive |
| CGATGTCTTTCGCATACCGTCCG   | 0   | 11  | RDR2-sensitive |
| CGATGTGACGTAGATGTTGTGGCT  | 0   | 18  | RDR2-sensitive |
| CGATGTGCGCCGGGCTGAGCAGGC  | 0   | 12  | RDR2-sensitive |
| CGATGTGGAGGGCGCTGCGCAGAT  | 25  | 0   | RDR2-resistant |
| CGATGTGGGACTAAAGCCGAGGCA  | 0   | 9   | RDR2-sensitive |
| CGATGTGGGACTAAAGCCGGGACG  | 0   | 16  | RDR2-sensitive |
| CGATGTGGGACTAAAGCCGGGGCG  | 0   | 17  | RDR2-sensitive |
| CGATGTGTAGTGTGATGGTCTGGG  | 921 | 63  | RDR2-resistant |
| CGATGTTATAGGACTTGACGTCAA  | 0   | 17  | RDR2-sensitive |
| CGATGTTGGCCTCGAGTGAGTCGT  | 0   | 17  | RDR2-sensitive |

|                           |     |    |                |
|---------------------------|-----|----|----------------|
| CGATTAGGCTCGGCTCGGCTCGGT  | 0   | 11 | RDR2-sensitive |
| CGATTATCCGTCGGGCCTAACGGG  | 0   | 21 | RDR2-sensitive |
| CGATTATGTAAACGGGCCTGGCGT  | 0   | 9  | RDR2-sensitive |
| CGATTATTCAAGGACTGTTCAAGC  | 603 | 19 | RDR2-resistant |
| CGATTCAATCGACTAATCGGGCTA  | 0   | 11 | RDR2-sensitive |
| CGATTCCATCGGTGCTGCAGTGCC  | 0   | 9  | RDR2-sensitive |
| CGATTCCGATCAATGGACTGGGCGG | 0   | 9  | RDR2-sensitive |
| CGATTCCGGTAGATTATAATGGCAA | 0   | 26 | RDR2-sensitive |
| CGATTGGAACCGCGAGCAGCAGAG  | 0   | 16 | RDR2-sensitive |
| CGATTGGACCAGGCCTGACGGTTG  | 0   | 14 | RDR2-sensitive |
| CGATTGGAGGAGTCTAGGTCGGCC  | 0   | 16 | RDR2-sensitive |
| CGATTGTGACTGGTTCTGCGGCAC  | 0   | 11 | RDR2-sensitive |
| CGATTGTGGAGACCGTGCTGTCAT  | 0   | 22 | RDR2-sensitive |
| CGATTGTTACTTGGTACTTGCAGA  | 17  | 0  | RDR2-resistant |
| CGATTTATTCGCGGGCTAGCACGG  | 0   | 10 | RDR2-sensitive |
| CGATTTCAGCTCGGCTCTACTCGG  | 0   | 10 | RDR2-sensitive |
| CGATTTGGTCGGTCGGTGCGGCGA  | 0   | 9  | RDR2-sensitive |
| CGCAAACTGTATCGAGATAGCGT   | 0   | 11 | RDR2-sensitive |
| CGCAAACACGGACGAGCAGGGCAA  | 0   | 28 | RDR2-sensitive |
| CGCAAAGAACGGCAGCGCTCTCAT  | 0   | 13 | RDR2-sensitive |
| CGCAAAGACTGAGATGCACCGGTG  | 0   | 10 | RDR2-sensitive |
| CGCAAAGGACTGGCGAGCGGCGAC  | 0   | 11 | RDR2-sensitive |
| CGCAAAGGTAGAAGCAGCGAACAG  | 0   | 10 | RDR2-sensitive |
| CGCAACAGCTCGACTCGGACCGGC  | 0   | 13 | RDR2-sensitive |
| CGCAACCTAGGACTCAGCACGGTT  | 1   | 22 | RDR2-sensitive |
| CGCAACTTGAATGGATCGAATCGG  | 0   | 11 | RDR2-sensitive |
| CGCAAGCAGTAGATCACGGAACAG  | 1   | 46 | RDR2-sensitive |
| CGCAAGTACGGATCACCGCAGGAC  | 17  | 0  | RDR2-resistant |
| CGCAAGTTAGCGCTGTGTGACGGT  | 0   | 64 | RDR2-sensitive |
| CGCAAGTTCGGATAGGGACGGCTG  | 0   | 11 | RDR2-sensitive |
| CGCAATCGGACGGTGGAGATGGAG  | 0   | 10 | RDR2-sensitive |
| CGCAATCGGACGGTGGGGATGGAC  | 0   | 14 | RDR2-sensitive |
| CGCAATGATGGCTAGGAACAACAA  | 1   | 13 | RDR2-sensitive |
| CGCACCTAGGCTCTCGGGAGATG   | 39  | 1  | RDR2-resistant |
| CGCACCGGACAAGGAACAGTGCAT  | 0   | 20 | RDR2-sensitive |
| CGCACCGGACAGTGAACAGTGCAT  | 0   | 33 | RDR2-sensitive |
| CGCACGCGTCGGTGCGTAGGCGGC  | 0   | 11 | RDR2-sensitive |
| CGCACGGATTAGCTAGCAGGTCGT  | 0   | 93 | RDR2-sensitive |
| CGCACGGCACGGCACTGGCACTAG  | 1   | 34 | RDR2-sensitive |
| CGCACGTCGTCGCGTGTGTTCCGC  | 4   | 32 | RDR2-sensitive |
| CGCACTCGACTGGACACTCGCGGC  | 0   | 20 | RDR2-sensitive |
| CGCACTCGGCAAAGAAGGCTCGGC  | 3   | 27 | RDR2-sensitive |
| CGCACTCGGCAAAGGGACTGGCAA  | 0   | 13 | RDR2-sensitive |
| CGCACTGTGGAGCGGGAGTTGCAT  | 3   | 25 | RDR2-sensitive |
| CGCACTGTGGGATGCCTTCGTCCG  | 0   | 15 | RDR2-sensitive |
| CGCAGAAGGCCAGGTAGAGCGGTT  | 0   | 20 | RDR2-sensitive |
| CGCAGACCATACGGCCCTAGGACC  | 0   | 10 | RDR2-sensitive |
| CGCAGACTGTTCCGCGTGTGGGCGG | 0   | 9  | RDR2-sensitive |
| CGCAGAGACGGACGGGACAACCGC  | 0   | 10 | RDR2-sensitive |

|                           |    |    |                |
|---------------------------|----|----|----------------|
| CGCAGCAGCTCGGCTCGGCTCGGA  | 0  | 11 | RDR2-sensitive |
| CGCAGCATCTGTAGGCGGCCGC    | 0  | 19 | RDR2-sensitive |
| CGCAGCCACGGACGGTAAACACAA  | 0  | 10 | RDR2-sensitive |
| CGCAGCCGGATTGCAGCCGCAGCA  | 0  | 21 | RDR2-sensitive |
| CGCAGCGACGCGCAGGACCTCGAC  | 0  | 9  | RDR2-sensitive |
| CGCAGGACACTTGGACGAGCGGCT  | 0  | 10 | RDR2-sensitive |
| CGCAGGACCAGGCCCATTTGGAAC  | 0  | 18 | RDR2-sensitive |
| CGCAGGACGTAACATGAGAGCGGG  | 0  | 9  | RDR2-sensitive |
| CGCAGGACTCTGCCGAGAGCGGCC  | 0  | 12 | RDR2-sensitive |
| CGCAGGACTGACCGGCTGCATGAG  | 62 | 1  | RDR2-resistant |
| CGCAGGACTGTGCAGGCACGGCAC  | 0  | 47 | RDR2-sensitive |
| CGCAGGACTGTGCAGGCCCGGCC   | 0  | 21 | RDR2-sensitive |
| CGCAGGACTGTGCAGGCCCGGCCT  | 0  | 12 | RDR2-sensitive |
| CGCAGGACTGTGTAGGCCCGGCC   | 0  | 12 | RDR2-sensitive |
| CGCAGGACTTTGCCGAGTGC GGCT | 0  | 14 | RDR2-sensitive |
| CGCAGGGAAAGGAACAGGAGCAC   | 0  | 16 | RDR2-sensitive |
| CGCAGGTTGTATGGACAGACGCAA  | 0  | 29 | RDR2-sensitive |
| CGCAGGTTGTGGACAGTCCGTGAT  | 0  | 23 | RDR2-sensitive |
| CGCAGTCTTCGCCGTGGAACAGGC  | 24 | 2  | RDR2-resistant |
| CGCAGTGACAACGAACAGACGCGC  | 0  | 10 | RDR2-sensitive |
| CGCAGTGATTGGCGCTCGGATCGG  | 0  | 9  | RDR2-sensitive |
| CGCAGTTTTTCTAGGCTGGTCGGA  | 0  | 12 | RDR2-sensitive |
| CGCATACCGGACAGATGACGCAGT  | 0  | 9  | RDR2-sensitive |
| CGCATAGAACCAGGTCGTGTCGGG  | 0  | 11 | RDR2-sensitive |
| CGCATCGGCCAGGCAGAACGGGTT  | 0  | 12 | RDR2-sensitive |
| CGCATCTCGCCTGTGGAGCGTCGT  | 0  | 49 | RDR2-sensitive |
| CGCATCTGAGCATGTAGACGCCAC  | 0  | 24 | RDR2-sensitive |
| CGCATGACACGGGTCTGGACGCGT  | 0  | 9  | RDR2-sensitive |
| CGCATGAGCCTGACTGAGATGAGC  | 0  | 10 | RDR2-sensitive |
| CGCATGATTCGATCGGGAGCGGAT  | 0  | 9  | RDR2-sensitive |
| CGCATGCGTCGCTGTGTTCCGGCAA | 0  | 18 | RDR2-sensitive |
| CGCATGTGTTCCGGTCTAGATGGAT | 0  | 24 | RDR2-sensitive |
| CGCATTGTCGGTCGTTTTAGGCAT  | 0  | 9  | RDR2-sensitive |
| CGCATTTTGCACGGTCTGAGGCAC  | 0  | 65 | RDR2-sensitive |
| CGCCAAAATTCGGACGACGTGCAT  | 0  | 26 | RDR2-sensitive |
| CGCCAACCATGATGTCTTGGTGCC  | 26 | 2  | RDR2-resistant |
| CGCCAAGACCTGGGACTTGATGGC  | 1  | 27 | RDR2-sensitive |
| CGCCAAGACTTGGGACTTGATGGC  | 3  | 22 | RDR2-sensitive |
| CGCCAATCACTGCGTGAGAACCGG  | 0  | 14 | RDR2-sensitive |
| CGCCACGTTTGGAGAGCGTCGGAG  | 0  | 13 | RDR2-sensitive |
| CGCCACTAGAAATAGCACAGTCGG  | 0  | 15 | RDR2-sensitive |
| CGCCACTGTGCAGAATTGCGGACA  | 0  | 20 | RDR2-sensitive |
| CGCCAGATCTGGGACGACGTGCGC  | 0  | 9  | RDR2-sensitive |
| CGCCAGCCGTAGAGCAGAGTACGT  | 0  | 9  | RDR2-sensitive |
| CGCCAGGTCGTGGACTCTTCGGTA  | 0  | 11 | RDR2-sensitive |
| CGCCATAAGTCGGCAGCTGAAGGA  | 0  | 11 | RDR2-sensitive |
| CGCCATCGCAGGACGGCAGACCAT  | 0  | 9  | RDR2-sensitive |
| CGCCATGTGGACTATAGAGGGCTT  | 1  | 17 | RDR2-sensitive |
| CGCCATTGCTGTAGAAGTGTGCAG  | 0  | 9  | RDR2-sensitive |

|                           |    |     |                |
|---------------------------|----|-----|----------------|
| CGCCCACTGTGTGTTTCGTTGCTTC | 0  | 13  | RDR2-sensitive |
| CGCCCATTTGGCCTGTGGCACGGC  | 0  | 15  | RDR2-sensitive |
| CGCCCCTACAGCTAGGTCGCGGAC  | 0  | 10  | RDR2-sensitive |
| CGCCCCTGCGTCGGAATTGGTGTA  | 30 | 1   | RDR2-resistant |
| CGCCCCTGTAGATCAACGGCTGAA  | 8  | 133 | RDR2-sensitive |
| CGCCCCTGTGCAGAGAGCACCGCC  | 0  | 11  | RDR2-sensitive |
| CGCCCGCTTATTCTACCGTGCCGG  | 0  | 25  | RDR2-sensitive |
| CGCCCGTAGCTCTGGCCTAGGCAT  | 0  | 14  | RDR2-sensitive |
| CGCCCGTCTGACAGCCGTGCGGCTA | 0  | 13  | RDR2-sensitive |
| CGCCCGTTTGGCCCGTGGCACGGC  | 0  | 9   | RDR2-sensitive |
| CGCCCGTTTGGCCTGTGGCACGGC  | 0  | 41  | RDR2-sensitive |
| CGCCCTATCGTCGTCGCCAGGAGA  | 22 | 0   | RDR2-resistant |
| CGCCCTGGGGAACGACGACGGTAG  | 0  | 15  | RDR2-sensitive |
| CGCCGACGGCTTGTCTGACAGCAT  | 0  | 9   | RDR2-sensitive |
| CGCCGACTGCAGGGGACAAGTCAT  | 0  | 25  | RDR2-sensitive |
| CGCCGACTGTAGGGGACAAGTCAT  | 0  | 14  | RDR2-sensitive |
| CGCCGAGAGGCAGAACGATGGCAC  | 0  | 11  | RDR2-sensitive |
| CGCCGAGCTCGGTACCACGTGCGC  | 2  | 23  | RDR2-sensitive |
| CGCCGAGCTCGGTGCCACGTGCGAC | 0  | 12  | RDR2-sensitive |
| CGCCGAGCTCGGTGCCACGTGCGC  | 2  | 30  | RDR2-sensitive |
| CGCCGAGCTCTGACGTGGCCGCAA  | 1  | 14  | RDR2-sensitive |
| CGCCGAGCTCTGACGTGGCGACGA  | 0  | 11  | RDR2-sensitive |
| CGCCGAGCTCTGACGTGGCGACGG  | 0  | 11  | RDR2-sensitive |
| CGCCGAGCTGTGACGTGGCCGCAA  | 0  | 20  | RDR2-sensitive |
| CGCCGAGGTACGTGCTACGCTGGC  | 0  | 20  | RDR2-sensitive |
| CGCCGAGGTACGTGCTGCGCTGGC  | 1  | 14  | RDR2-sensitive |
| CGCCGAGGTCTGTAGCTGGCGGG   | 58 | 3   | RDR2-resistant |
| CGCCGATGACTGGAAGTAGGGACG  | 0  | 13  | RDR2-sensitive |
| CGCCGCACGGAGACGCAGTAGGAC  | 0  | 9   | RDR2-sensitive |
| CGCCGCGGCTTAGACACGACGTGG  | 0  | 13  | RDR2-sensitive |
| CGCCGCTGCAGCTGTTAGGACGGC  | 0  | 11  | RDR2-sensitive |
| CGCCGGAATCAGCAGGATCGACGA  | 0  | 10  | RDR2-sensitive |
| CGCCGGAATCAGCAGGGTTCGACGA | 4  | 115 | RDR2-sensitive |
| CGCCGGAAGAAGAAGACAGCAGCAC | 3  | 17  | RDR2-sensitive |
| CGCCGGTGACGAACTCCAAGCGGC  | 0  | 48  | RDR2-sensitive |
| CGCCGTTTCGTCGACAGCTAAGGC  | 0  | 22  | RDR2-sensitive |
| CGCCGTCATGTCGTTGGATGGAAA  | 0  | 16  | RDR2-sensitive |
| CGCCGTCGTGACAATTGAACGGGT  | 0  | 9   | RDR2-sensitive |
| CGCCTAAGCTGAAGGATGGACGAT  | 47 | 0   | RDR2-resistant |
| CGCCTAAGGGTGCAGCCGGACTAA  | 0  | 11  | RDR2-sensitive |
| CGCCTACGCCTCCAATCGTCGAA   | 0  | 26  | RDR2-sensitive |
| CGCCTCAGCCTTAGCTCGTCGGTC  | 0  | 9   | RDR2-sensitive |
| CGCCTCAAATCGTCGAAGCCGCA   | 0  | 12  | RDR2-sensitive |
| CGCCTCGTGCGGGCTTGGCGTGAA  | 17 | 1   | RDR2-resistant |
| CGCCTCTGTGCTGTAGACGCGGTT  | 0  | 28  | RDR2-sensitive |
| CGCCTGACCAGAGAGCACCCGCCG  | 1  | 26  | RDR2-sensitive |
| CGCCTGCAACTGCGGTCTCGTCGT  | 0  | 15  | RDR2-sensitive |
| CGCCTGCCCCGACCGAGGACAGAT  | 1  | 17  | RDR2-sensitive |
| CGCCTGCTCGGACGGAGGACAGAT  | 9  | 41  | RDR2-sensitive |

|                           |    |     |                |
|---------------------------|----|-----|----------------|
| CGCCTGCTCGGACGGAGGACGGAT  | 6  | 26  | RDR2-sensitive |
| CGCCTGCTCGGACGGTGGACGGAT  | 2  | 18  | RDR2-sensitive |
| CGCCTGGACTGGGGAAGATGGTGC  | 0  | 10  | RDR2-sensitive |
| CGCCTGGCTCCCTGGAAACGGCAC  | 0  | 10  | RDR2-sensitive |
| CGCCTGTAGATCAACGGCTGAAAA  | 0  | 9   | RDR2-sensitive |
| CGCCTGTGGGTTGCCTGACGCGGT  | 0  | 54  | RDR2-sensitive |
| CGCCTGTGTAGAGGCTAACCGGAC  | 0  | 16  | RDR2-sensitive |
| CGCCTGTTTGAAGTGTGGCACGGC  | 2  | 50  | RDR2-sensitive |
| CGCCTTCTAGTGGACCTGAGGGAT  | 0  | 23  | RDR2-sensitive |
| CGCCTTTTTTAGACGTGTCGTA    | 17 | 0   | RDR2-resistant |
| CGCGAAAAAGAACCCACGGCGCCC  | 3  | 24  | RDR2-sensitive |
| CGCGAACTGTGGCAGGAGCGGGTT  | 0  | 10  | RDR2-sensitive |
| CGCGAAGACGTGACTGCACCTGTA  | 0  | 9   | RDR2-sensitive |
| CGCGACACAGAGCCGGACGGTCCG  | 0  | 11  | RDR2-sensitive |
| CGCGACACAGCACGCTGACGACAC  | 0  | 9   | RDR2-sensitive |
| CGCGACACCGTAGAGGGCACCGAC  | 0  | 18  | RDR2-sensitive |
| CGCGACACGTGGACCAGTCAGATC  | 0  | 10  | RDR2-sensitive |
| CGCGACAGGAAGCGATGACGACGC  | 0  | 24  | RDR2-sensitive |
| CGCGACAGTGGAGGCATGCACGGA  | 0  | 19  | RDR2-sensitive |
| CGCGACATAGAGCAATAGGGGGAG  | 25 | 1   | RDR2-resistant |
| CGCGACCCACAAACAAGGACCGGC  | 0  | 10  | RDR2-sensitive |
| CGCGACCCACAAACAGGACTGGCA  | 1  | 16  | RDR2-sensitive |
| CGCGACCGAGATTCTGGAGGTGGC  | 0  | 10  | RDR2-sensitive |
| CGCGACCGTGGTCGTGTTTCGTCGA | 0  | 13  | RDR2-sensitive |
| CGCGACCTAGACGCTGGAGCGGCT  | 0  | 10  | RDR2-sensitive |
| CGCGACCTGGGCACATGAGCGGCT  | 0  | 13  | RDR2-sensitive |
| CGCGACCTGGTGCAGGAGCTCGGG  | 0  | 12  | RDR2-sensitive |
| CGCGACGAATGGGACACACGGAGC  | 0  | 11  | RDR2-sensitive |
| CGCGACGAATTCGGCAACCATCTC  | 0  | 10  | RDR2-sensitive |
| CGCGACGAGTAGACGCAACGGCGC  | 0  | 14  | RDR2-sensitive |
| CGCGACGCGTGTAGAAGGGCGGAC  | 0  | 9   | RDR2-sensitive |
| CGCGACGGGGCATTGTAAGTGGCA  | 40 | 7   | RDR2-resistant |
| CGCGACGGTAGAACCAACGCGCAT  | 0  | 9   | RDR2-sensitive |
| CGCGACGGTGGAAACCAACGCGCGT | 0  | 14  | RDR2-sensitive |
| CGCGACTCTGGTAGGATGGATGGA  | 42 | 0   | RDR2-resistant |
| CGCGACTGATCAAGGCTGAGACGC  | 0  | 14  | RDR2-sensitive |
| CGCGACTGTAGCACCGCAGTGCAT  | 0  | 11  | RDR2-sensitive |
| CGCGACTGTGCTGGTAGACCACAC  | 0  | 9   | RDR2-sensitive |
| CGCGACTGTGGTCGTGTTTCATCGA | 0  | 20  | RDR2-sensitive |
| CGCGACTTAGACGTGGTGTGGCGC  | 0  | 14  | RDR2-sensitive |
| CGCGACTTGCAGCGGAGACGGGCG  | 16 | 0   | RDR2-resistant |
| CGCGAGACACAGGCGCTGATGCAT  | 0  | 27  | RDR2-sensitive |
| CGCGAGACAGTGTAAAGATGGAGAC | 1  | 201 | RDR2-sensitive |
| CGCGAGAGAGTGGAGCCTAGGCAT  | 1  | 33  | RDR2-sensitive |
| CGCGAGCATCGGTGTGGAAGACGA  | 0  | 15  | RDR2-sensitive |
| CGCGAGCTAAACGAGCCAGCTCGA  | 0  | 14  | RDR2-sensitive |
| CGCGAGGCGAAGGACAGTCAACGG  | 0  | 12  | RDR2-sensitive |
| CGCGATAGTCGTCATACGTTGAGC  | 0  | 11  | RDR2-sensitive |
| CGCGATCCGCGACGAATTCGGCAA  | 0  | 23  | RDR2-sensitive |

|                            |     |     |                |
|----------------------------|-----|-----|----------------|
| CGCGATCCGCGGGACGACGAGCAC   | 1   | 12  | RDR2-sensitive |
| CGCGCAACTCGAACACACGGTCAC   | 0   | 9   | RDR2-sensitive |
| CGCGCAAGATGGCAATAGCTCTGT   | 0   | 15  | RDR2-sensitive |
| CGCGCACCTAGGCTCTCGGGAGA    | 165 | 6   | RDR2-resistant |
| CGCGCACCGGACATGAACAGTGGC   | 0   | 10  | RDR2-sensitive |
| CGCGCACTGTAGACGACGGCCAA    | 0   | 20  | RDR2-sensitive |
| CGCGCAGATTCTGGAACGTGCAGC   | 0   | 15  | RDR2-sensitive |
| CGCGCAGCGCGTCGGCAGGGGCGC   | 28  | 2   | RDR2-resistant |
| CGCGCATACGTACAGAGACTCCAT   | 0   | 19  | RDR2-sensitive |
| CGCGCATGCAGAACGAGCACTCAA   | 0   | 14  | RDR2-sensitive |
| CGCGCATGTGTAGGGACGACGAAA   | 0   | 9   | RDR2-sensitive |
| CGCGCCGGAATCAGCAGGGTCGAC   | 0   | 41  | RDR2-sensitive |
| CGCGCCTGTAGATCAACGGCTGAA   | 1   | 44  | RDR2-sensitive |
| CGCGCGATGGCAGAACAGGGCGTT   | 0   | 154 | RDR2-sensitive |
| CGCGCGATTGTGGGGCATGTTTAT   | 0   | 9   | RDR2-sensitive |
| CGCGCGCTGTAGAAGGCACCGTCA   | 0   | 13  | RDR2-sensitive |
| CGCGCGGAAGGCCAGGTAGAGCGG   | 1   | 76  | RDR2-sensitive |
| CGCGCGGACTCGGCCGAACGGCGC   | 0   | 14  | RDR2-sensitive |
| CGCGCGGATGGCAGAGGCGAACTC   | 0   | 9   | RDR2-sensitive |
| CGCGCGGGAGAACGGGCTGACGGA   | 0   | 9   | RDR2-sensitive |
| CGCGCGTCAGGATAAAGGTGTCAG   | 2   | 14  | RDR2-sensitive |
| CGCGCGTGCGTAGAGACGGTGAAG   | 0   | 15  | RDR2-sensitive |
| CGCGCTATGCTGAAGGTCGTCCGT   | 0   | 16  | RDR2-sensitive |
| CGCGCTCACCTCAGTATCGTCGCA   | 14  | 0   | RDR2-resistant |
| CGCGCTCTGAACCAGACGACCCGC   | 0   | 22  | RDR2-sensitive |
| CGCGCTCTGTCATGCTCGACGGTT   | 0   | 14  | RDR2-sensitive |
| CGCGCTGCTGTGGAGGACGAGCGC   | 0   | 11  | RDR2-sensitive |
| CGCGCTGTACACTCCC GCGCCGCGC | 0   | 11  | RDR2-sensitive |
| CGCGGAAACCCAGGTAGAGCGGTT   | 0   | 17  | RDR2-sensitive |
| CGCGGAAAGCCTGCAGGACGTTCGC  | 1   | 25  | RDR2-sensitive |
| CGCGGAAAGGCTAGGTAGAGCGGC   | 0   | 12  | RDR2-sensitive |
| CGCGGAACAGGATTCGGCCCACTA   | 0   | 14  | RDR2-sensitive |
| CGCGGAAGGCCAGGTAGAGCGGTT   | 1   | 35  | RDR2-sensitive |
| CGCGGACACCACTTTGCGTCGGAC   | 14  | 0   | RDR2-resistant |
| CGCGGACAGAACTGCAGCAGACCG   | 0   | 25  | RDR2-sensitive |
| CGCGGACAGTCCACGGCACAGGAT   | 0   | 9   | RDR2-sensitive |
| CGCGGACATTGTCGAGTAGACGA    | 0   | 11  | RDR2-sensitive |
| CGCGGACCACGAAGCGAAGGTCGT   | 0   | 12  | RDR2-sensitive |
| CGCGGACCTTGGGGCCGGCGCCCT   | 46  | 0   | RDR2-resistant |
| CGCGGACCTTTCGGAAGTGTGCAG   | 0   | 10  | RDR2-sensitive |
| CGCGGACGTTAGGGAAATCGCGGC   | 0   | 11  | RDR2-sensitive |
| CGCGGACTCGCTGCGCACGGGCAA   | 0   | 9   | RDR2-sensitive |
| CGCGGAGCCTCAGATGAAGAACGG   | 0   | 9   | RDR2-sensitive |
| CGCGGAGCTGACGGTGTAGATTAT   | 0   | 9   | RDR2-sensitive |
| CGCGGATAGTCCGGCACAGACGC    | 0   | 9   | RDR2-sensitive |
| CGCGGATGGGAATGGCAGAACCGG   | 0   | 19  | RDR2-sensitive |
| CGCGGATTGATCGGGCGAGCGGTT   | 0   | 11  | RDR2-sensitive |
| CGCGGCACAGGCAGAACCGTGAC    | 0   | 12  | RDR2-sensitive |
| CGCGGCACAGGGTCGGACGGTCCG   | 0   | 15  | RDR2-sensitive |

|                           |     |     |                |
|---------------------------|-----|-----|----------------|
| CGCGGCAGGGCGCTGGCTCCTTTC  | 292 | 8   | RDR2-resistant |
| CGCGGCAGGTAGCTCGGCGCCAAG  | 0   | 19  | RDR2-sensitive |
| CGCGGCAGTACGACATAGGCGCAT  | 0   | 15  | RDR2-sensitive |
| CGCGGCCCGGACACGACAGACGAC  | 0   | 11  | RDR2-sensitive |
| CGCGGCCCTCTGAACAGTCGACGT  | 0   | 26  | RDR2-sensitive |
| CGCGGCCGGCAGCACATCACGGGC  | 0   | 9   | RDR2-sensitive |
| CGCGGCCTCGTAGCTCGGCGCCAC  | 3   | 28  | RDR2-sensitive |
| CGCGGC GCACTGGCGGAATGTGGC | 0   | 15  | RDR2-sensitive |
| CGCGGC GCGGTCATCAGTAGGGTA | 48  | 3   | RDR2-resistant |
| CGCGGC GCGGAACACGGACCATAG | 14  | 0   | RDR2-resistant |
| CGCGGCGTATGAGATGGACGGCAC  | 0   | 9   | RDR2-sensitive |
| CGCGGCGTGTGTAGTCCCGGCAC   | 0   | 19  | RDR2-sensitive |
| CGCGGCTGGAACCTGGAAGCGGAA  | 0   | 11  | RDR2-sensitive |
| CGCGGCTGGAACCTGGAAGCGGAG  | 1   | 30  | RDR2-sensitive |
| CGCGGCTTAGACACGACGTGGCGT  | 1   | 187 | RDR2-sensitive |
| CGCGGGAACGGCGTATCTGGGCGG  | 0   | 9   | RDR2-sensitive |
| CGCGGGACCGAGGACGGGACAGGC  | 14  | 59  | RDR2-sensitive |
| CGCGGGATTGCAGAAGCGGCGGCT  | 1   | 14  | RDR2-sensitive |
| CGCGGGCGAGAGTGGAGGCGACAG  | 0   | 9   | RDR2-sensitive |
| CGCGGGCGTAGAGAAATGCGCGGC  | 0   | 9   | RDR2-sensitive |
| CGCGGGCTAGCTAACGCGGCACAG  | 0   | 10  | RDR2-sensitive |
| CGCGGGCTGGCTAACGCGGTCCAG  | 0   | 32  | RDR2-sensitive |
| CGCGGGCTGGCTGACGCGGTCCAG  | 0   | 11  | RDR2-sensitive |
| CGCGGGCTGGGACAAGGCATGACA  | 0   | 35  | RDR2-sensitive |
| CGCGGGGACGAGGACGAGACAGGC  | 21  | 49  | RDR2-sensitive |
| CGCGGGGCGAGCATGCAGAACCGT  | 0   | 20  | RDR2-sensitive |
| CGCGGTACCAACGGCGATACTCGA  | 1   | 32  | RDR2-sensitive |
| CGCGGTTCGCTCTGTGCCTCGGCAT | 0   | 14  | RDR2-sensitive |
| CGCGGTTCGCTGTTACGGTAGTCCT | 0   | 17  | RDR2-sensitive |
| CGCGGTCTGAGTGCAGGAGCGACG  | 0   | 10  | RDR2-sensitive |
| CGCGGTGACTTGTAGTGGCAGAGA  | 0   | 10  | RDR2-sensitive |
| CGCGGTGCGATACTCACGACGGTT  | 0   | 11  | RDR2-sensitive |
| CGCGGTGCTTTTGGATAGGACGGT  | 0   | 45  | RDR2-sensitive |
| CGCGGTGCTTTTGGGTAGGACGGT  | 1   | 60  | RDR2-sensitive |
| CGCGGTGGAAGGATGAGATGAGAT  | 0   | 17  | RDR2-sensitive |
| CGCGGTGTAGGATGGGCGAGCAC   | 0   | 26  | RDR2-sensitive |
| CGCGGTGTGTGGAACGGCGGCG    | 1   | 33  | RDR2-sensitive |
| CGCGGTTGGCACTGCGGTCTTTGG  | 15  | 0   | RDR2-resistant |
| CGCGTAACTGCGTCGGCGCGTCGC  | 0   | 11  | RDR2-sensitive |
| CGCGTAACTGTGTTACGCGGTT    | 0   | 10  | RDR2-sensitive |
| CGCGTAACTCAGGGACAGGGCA    | 0   | 10  | RDR2-sensitive |
| CGCGTACCCTAGGCTCTCGGGAGA  | 31  | 0   | RDR2-resistant |
| CGCGTACCTGAAAGAAGCCGTCCA  | 1   | 14  | RDR2-sensitive |
| CGCGTACGGCGAGCTCGGACGTGC  | 0   | 16  | RDR2-sensitive |
| CGCGTAGAACGGCGTCGACACCAA  | 0   | 19  | RDR2-sensitive |
| CGCGTAGAGGGCGCTGTAGGGGGC  | 0   | 11  | RDR2-sensitive |
| CGCGTAGGACAATTCGGCTAGGCC  | 0   | 13  | RDR2-sensitive |
| CGCGTAGGACAGTTCGGCAAGGCC  | 0   | 48  | RDR2-sensitive |
| CGCGTAGGACAGTTCGGCTAGGCC  | 3   | 119 | RDR2-sensitive |



|                           |   |    |                |
|---------------------------|---|----|----------------|
| CGCGTAGGGGACGCTGTAGGGGCA  | 1 | 12 | RDR2-sensitive |
| CGCGTAGGGGGCGCTGTAGGGGCA  | 0 | 17 | RDR2-sensitive |
| CGCGTAGGGGGCGCTGTAGGGGGC  | 0 | 11 | RDR2-sensitive |
| CGCGTATGGTGCGCTGTAGGAGGC  | 0 | 10 | RDR2-sensitive |
| CGCGTCAGAGGCAGAACACGTCAG  | 0 | 37 | RDR2-sensitive |
| CGCGTCAGAGGCAGAACGGCAGAC  | 0 | 17 | RDR2-sensitive |
| CGCGTCGAGACGTGCATTGGTCGT  | 0 | 11 | RDR2-sensitive |
| CGCGTCGAGCTGAGACAGTGCGGT  | 0 | 9  | RDR2-sensitive |
| CGCGTCGAGGCGTGCAATTGATCGT | 2 | 25 | RDR2-sensitive |
| CGCGTCGTTCTGTGGAAGACCCGGT | 0 | 9  | RDR2-sensitive |
| CGCGTCTGGGCGAGAGGGAGGCGA  | 0 | 10 | RDR2-sensitive |
| CGCGTGAGACTAAGGAGCGGCGGC  | 0 | 9  | RDR2-sensitive |
| CGCGTGCATCTAGCCCGTGTCCGA  | 0 | 32 | RDR2-sensitive |
| CGCGTGCATCTAGCCCGTGTCCGG  | 0 | 9  | RDR2-sensitive |
| CGCGTGCCCCAGCCAGATGGGTC   | 0 | 9  | RDR2-sensitive |
| CGCGTGCGCAGAACAGATTAGGGT  | 4 | 53 | RDR2-sensitive |
| CGCGTGCGTCGGTAGATATGGCAT  | 0 | 9  | RDR2-sensitive |
| CGCGTGCTGGGCTTGGACGCCATA  | 0 | 14 | RDR2-sensitive |
| CGCGTGGATACTGCGTGGAATCGT  | 0 | 21 | RDR2-sensitive |
| CGCGTGGCCGCCTCTGTATTACGG  | 0 | 10 | RDR2-sensitive |
| CGCGTGGGTGGACTGAACGACGGA  | 0 | 12 | RDR2-sensitive |
| CGCGTGGTCTGTGTGCTTCGGTAT  | 0 | 15 | RDR2-sensitive |
| CGCGTGTATGGACAGGCTAGGCGC  | 0 | 11 | RDR2-sensitive |
| CGCGTGTGTGCAGGACGATGGCGT  | 0 | 34 | RDR2-sensitive |
| CGCGTTCAGATCTGTGTGAGGCAC  | 1 | 44 | RDR2-sensitive |
| CGCGTTCATACCTCTGAAGCGGT   | 0 | 9  | RDR2-sensitive |
| CGCGTTGGACATGTGTGGACGGGT  | 0 | 10 | RDR2-sensitive |
| CGCGTTGGAGAACTAGCAGGCCGC  | 0 | 11 | RDR2-sensitive |
| CGCGTTGGAGGAGTCGGCAGCCGC  | 0 | 13 | RDR2-sensitive |
| CGCGTTTCGGACTCCAGAGGGTGT  | 0 | 33 | RDR2-sensitive |
| CGCTAAAATACAGTCGGGCGTCAA  | 0 | 34 | RDR2-sensitive |
| CGCTAAAATCCGGACGACGTGCAT  | 1 | 60 | RDR2-sensitive |
| CGCTAAGGACACAACACTCGGCAT  | 0 | 10 | RDR2-sensitive |
| CGCTAATCTGTAGGATAGTATGGT  | 0 | 10 | RDR2-sensitive |
| CGCTAATGAATCTGGATGGGGCGT  | 0 | 11 | RDR2-sensitive |
| CGCTAATGTCGGTGGCGTCTACAT  | 0 | 16 | RDR2-sensitive |
| CGCTACAATCGACGACTGCGGCGC  | 0 | 14 | RDR2-sensitive |
| CGCTACGGTTTCTGAGAAGGGCAA  | 0 | 10 | RDR2-sensitive |
| CGCTAGATCTACCGGACGACGAGC  | 0 | 11 | RDR2-sensitive |
| CGCTAGATCTACTGGACGACGAGC  | 0 | 17 | RDR2-sensitive |
| CGCTAGCGACGAGGACTGACGCGG  | 0 | 11 | RDR2-sensitive |
| CGCTAGCTGAAGTAGGACGAGCGA  | 0 | 21 | RDR2-sensitive |
| CGCTAGGGTTGGACCGCGCGGCGC  | 0 | 14 | RDR2-sensitive |
| CGCTAGTACTGTAGCACCGGTAGG  | 2 | 64 | RDR2-sensitive |
| CGCTATACTGCATGCACTCAGCCA  | 0 | 9  | RDR2-sensitive |
| CGCTATAGATATCGTCGGGGACTA  | 0 | 12 | RDR2-sensitive |
| CGCTATATTTATCGGACAGTGCAT  | 1 | 18 | RDR2-sensitive |
| CGCTATCGATATCGGATTGGTCGT  | 0 | 12 | RDR2-sensitive |
| CGCTATCTGGCTGAGTCGTGAGT   | 0 | 14 | RDR2-sensitive |

|                          |    |     |                |
|--------------------------|----|-----|----------------|
| CGCTATGTGTAGAGGCTGTACGGC | 0  | 11  | RDR2-sensitive |
| CGCTCAACGGCAGAACAGATGGCT | 0  | 10  | RDR2-sensitive |
| CGCTCACGCGAGAACTCGTCCGGC | 0  | 16  | RDR2-sensitive |
| CGCTCAGGCTGTGAGGAGATGCAT | 0  | 66  | RDR2-sensitive |
| CGCTCATCCCGGACGTTGCGGCAA | 0  | 9   | RDR2-sensitive |
| CGCTCCACCAACTAAGAACGGCCA | 69 | 3   | RDR2-resistant |
| CGCTCCTGAAGACGTAGAGGACAG | 0  | 20  | RDR2-sensitive |
| CGCTCCTGCAACGAGGTCGCGGAC | 0  | 10  | RDR2-sensitive |
| CGCTCCTGCAGCGAGATTGCGGAC | 0  | 14  | RDR2-sensitive |
| CGCTCCTGCAGCGAGGTCGTGGAC | 0  | 20  | RDR2-sensitive |
| CGCTCCTGGGCTGCAACTAGGCGT | 0  | 11  | RDR2-sensitive |
| CGCTCCTGTAGCGAGGTCGTGGAC | 0  | 11  | RDR2-sensitive |
| CGCTCGACAAAGAAGGCTCGGCAA | 0  | 18  | RDR2-sensitive |
| CGCTCGACGAACTGTACATCGGCA | 0  | 9   | RDR2-sensitive |
| CGCTCGACTCGTGGCCAGCTCGGC | 0  | 15  | RDR2-sensitive |
| CGCTCGACTGCGTAGAAGAGGATT | 0  | 12  | RDR2-sensitive |
| CGCTCGCGGAATACGAATTCGGA  | 0  | 10  | RDR2-sensitive |
| CGCTCGCTCGGCTGAGATGGCGGC | 39 | 5   | RDR2-resistant |
| CGCTCGGCAAAGAACACTCGGCAA | 1  | 15  | RDR2-sensitive |
| CGCTCGGCGAACGACGGCGCTCAG | 0  | 10  | RDR2-sensitive |
| CGCTCGGCGAACTGTACATCGGCA | 5  | 209 | RDR2-sensitive |
| CGCTCGTCAGAAGGGGTCACGGAT | 45 | 5   | RDR2-resistant |
| CGCTCTCGGGAATTGAACGGCGGC | 0  | 9   | RDR2-sensitive |
| CGCTCTCGGGAATTTGCTGACGGC | 5  | 35  | RDR2-sensitive |
| CGCTCTGAACCAGACGACCCGCGT | 0  | 11  | RDR2-sensitive |
| CGCTCTGGCAGGTGGGTCTCACGC | 0  | 10  | RDR2-sensitive |
| CGCTCTGGGCTGTGCGTGTGCGGC | 0  | 45  | RDR2-sensitive |
| CGCTGAACACTCGGCACAGAACGG | 1  | 33  | RDR2-sensitive |
| CGCTGAATCAGTCTATGTGGCGTG | 21 | 0   | RDR2-resistant |
| CGCTGACATGTGGAGCCCGGCTGT | 0  | 19  | RDR2-sensitive |
| CGCTGACGTGTAGAGCCAGGCTAC | 0  | 13  | RDR2-sensitive |
| CGCTGACGTTGTCGCAGTAGACGA | 8  | 50  | RDR2-sensitive |
| CGCTGAGCCGGTGGTACCTGAGAT | 29 | 0   | RDR2-resistant |
| CGCTGAGCTCTGGCGTAAGGACGA | 0  | 21  | RDR2-sensitive |
| CGCTGAGTCTGTATACACGAGTGA | 0  | 19  | RDR2-sensitive |
| CGCTGCAGAATGGATGGTTGACAT | 0  | 15  | RDR2-sensitive |
| CGCTGCCGGAACCGAGGGAGACGT | 1  | 26  | RDR2-sensitive |
| CGCTGCCGGAGCCGAGGGAGACGT | 0  | 19  | RDR2-sensitive |
| CGCTGCGACTGTATAAGCAGAGGT | 0  | 12  | RDR2-sensitive |
| CGCTGCTGGAGAGCGTAGAGGACC | 0  | 9   | RDR2-sensitive |
| CGCTGCTGTACTGGGTCTTCGGAG | 0  | 13  | RDR2-sensitive |
| CGCTGCTGTGGACCCGGAGTAGGC | 0  | 14  | RDR2-sensitive |
| CGCTGCTGTGGAGGAGGGATGCAC | 0  | 14  | RDR2-sensitive |
| CGCTGCTTCAACACTGAGACGGGA | 14 | 0   | RDR2-resistant |
| CGCTGGACCTTTGCGCAGACTGCT | 0  | 12  | RDR2-sensitive |
| CGCTGGACGCAGGAAGCAGAACGG | 0  | 43  | RDR2-sensitive |
| CGCTGGAGCAGCTCGAGGACGCGC | 0  | 13  | RDR2-sensitive |
| CGCTGGAGCTGGAGCTGGAGCCGG | 1  | 13  | RDR2-sensitive |
| CGCTGGCGACGACAGAACCGTGCA | 0  | 9   | RDR2-sensitive |

|                           |    |    |                |
|---------------------------|----|----|----------------|
| CGCTGGCGGCCAGCCTGAACGGC   | 0  | 9  | RDR2-sensitive |
| CGCTGGGACAGAGATCAGGCACAA  | 0  | 10 | RDR2-sensitive |
| CGCTGTACTCCCGCGCCGGCAG    | 0  | 16 | RDR2-sensitive |
| CGCTGTAGAAAACCCGCTAGACGA  | 0  | 11 | RDR2-sensitive |
| CGCTGTAGACAGAAGATGGGCGAG  | 0  | 25 | RDR2-sensitive |
| CGCTGTAGAGGGCACCGCTGCGGC  | 0  | 24 | RDR2-sensitive |
| CGCTGTAGGAGGCACCGCTGCGGC  | 0  | 14 | RDR2-sensitive |
| CGCTGTAGGGGCACCGCTGCGGCC  | 0  | 10 | RDR2-sensitive |
| CGCTGTAGGGGGCACCGCTGCGGC  | 5  | 49 | RDR2-sensitive |
| CGCTGTCGGGCGGCCACCAAGACA  | 87 | 4  | RDR2-resistant |
| CGCTGTCTTCTCTGTGAGCGTGCA  | 0  | 14 | RDR2-sensitive |
| CGCTGTTTCGTTCGAGTGTGGCAC  | 0  | 13 | RDR2-sensitive |
| CGCTGTTGACTCGGGCCGTGCCGG  | 0  | 15 | RDR2-sensitive |
| CGCTGTTGACTCGGGTCGTGCCGG  | 0  | 15 | RDR2-sensitive |
| CGCTGTTGCATCGGGCTGTGCCGG  | 0  | 11 | RDR2-sensitive |
| CGCTTACGCCTCCAAATCGTCGAA  | 0  | 10 | RDR2-sensitive |
| CGCTTAGAAGTTATGGACGGCGTG  | 20 | 1  | RDR2-resistant |
| CGCTTATTCGTATCGGACCGGCC   | 0  | 17 | RDR2-sensitive |
| CGCTTATTCGTGTAGGGCCGGCCT  | 0  | 15 | RDR2-sensitive |
| CGCTTATTCGTGTCGGGCCGGGCC  | 2  | 14 | RDR2-sensitive |
| CGCTTATTCGTGTCGGGCCGGCCT  | 0  | 9  | RDR2-sensitive |
| CGCTTCCCCTGTTGAGGGCGTCGG  | 0  | 11 | RDR2-sensitive |
| CGCTTCCCTCACCCGCGTGGACGC  | 2  | 26 | RDR2-sensitive |
| CGCTTCCCTGCGGACTGTGGGCGGT | 1  | 13 | RDR2-sensitive |
| CGCTTCCCTGGACGCAGGGACGC   | 0  | 17 | RDR2-sensitive |
| CGCTTCTAGGGTTGGATCGCACGG  | 0  | 11 | RDR2-sensitive |
| CGCTTCTCGGGCACCGTAGGCGGC  | 1  | 27 | RDR2-sensitive |
| CGCTTCTCGGGCACCGTAGGCGGG  | 0  | 9  | RDR2-sensitive |
| CGCTTCTGTGCAAGCTCGTTGGT   | 0  | 9  | RDR2-sensitive |
| CGCTTGCGATCTCAGACTTGGCAT  | 0  | 9  | RDR2-sensitive |
| CGCTTGGCAAAGAGGAGGACTCAG  | 1  | 12 | RDR2-sensitive |
| CGCTTGGCCTCGCTGACGTCGGTT  | 26 | 2  | RDR2-resistant |
| CGCTTGTAGAGCCTGGATCAGGAT  | 0  | 16 | RDR2-sensitive |
| CGCTTGTATCCGGCGGACTAGGCT  | 0  | 13 | RDR2-sensitive |
| CGCTTTAGGGGAAGTGTGGAGAC   | 0  | 17 | RDR2-sensitive |
| CGGAAAACACGTAGGGGCAGGTCC  | 26 | 0  | RDR2-resistant |
| CGGAAAACGGTAGACGGACGGTGA  | 0  | 20 | RDR2-sensitive |
| CGGAAAAGGACACCGCGAAGACAT  | 0  | 20 | RDR2-sensitive |
| CGGAAACAGTAGTCCCGGACGGAT  | 1  | 14 | RDR2-sensitive |
| CGGAAACAGTGTAGGCCGTGCGAA  | 3  | 78 | RDR2-sensitive |
| CGGAAACCTCTAGAGCATGGCGAA  | 0  | 15 | RDR2-sensitive |
| CGGAAACGGAAACAGGAACGGGAT  | 0  | 19 | RDR2-sensitive |
| CGGAAACGGGAGCGGGATAAACGG  | 6  | 35 | RDR2-sensitive |
| CGGAAACGGTAACTCCGGAAACGG  | 0  | 34 | RDR2-sensitive |
| CGGAAAGACTACAGTAGCGACGAT  | 0  | 9  | RDR2-sensitive |
| CGGAAAGGAGACAGCGCTTGGAAC  | 0  | 12 | RDR2-sensitive |
| CGGAAATAAGTCCTGAACCGTCGG  | 0  | 11 | RDR2-sensitive |
| CGGAAATAGAGCTATTTTCGACGG  | 1  | 33 | RDR2-sensitive |
| CGGAAATAGCGTTATTTCCGTCGG  | 1  | 13 | RDR2-sensitive |

|                            |    |     |                |
|----------------------------|----|-----|----------------|
| CGGAACAACACTACGGTCGGAAACGG | 0  | 28  | RDR2-sensitive |
| CGGAACACGAACAGCGAGAGGAAC   | 0  | 9   | RDR2-sensitive |
| CGGAACAGGATGGACGCGGTGGAC   | 14 | 0   | RDR2-resistant |
| CGGAACAGTCGGAAAGGCAGTAGT   | 4  | 20  | RDR2-sensitive |
| CGGAACCCAACGGCCTGGTGACGT   | 0  | 13  | RDR2-sensitive |
| CGGAACCCGGACTGTTCGGCCCAT   | 0  | 20  | RDR2-sensitive |
| CGGAACCGTAGGCCGGCCTTAGCAG  | 0  | 11  | RDR2-sensitive |
| CGGAACGAAGGCAGAACCGTGAC    | 0  | 14  | RDR2-sensitive |
| CGGAACGATTCCGAGCCGGATTGC   | 0  | 52  | RDR2-sensitive |
| CGGAACGATTCTGACCGGATTGC    | 0  | 9   | RDR2-sensitive |
| CGGAACGATTTCTGACCGGATTGC   | 0  | 16  | RDR2-sensitive |
| CGGAACTTGTTCCGCATAGATCCA   | 0  | 16  | RDR2-sensitive |
| CGGAAGAACTCACCTTCGACGGTC   | 0  | 14  | RDR2-sensitive |
| CGGAAGACACATCTACGAGCCTGC   | 0  | 11  | RDR2-sensitive |
| CGGAAGACGACGAACTCCGCCTC    | 3  | 22  | RDR2-sensitive |
| CGGAAGACGGCGAACTCCGCTCCA   | 2  | 28  | RDR2-sensitive |
| CGGAAGACGGCGAACTCCGCTCCC   | 0  | 10  | RDR2-sensitive |
| CGGAAGACGGCGAACTCCGCTCCG   | 21 | 295 | RDR2-sensitive |
| CGGAAGATGCAACGGCGATCTGAT   | 79 | 0   | RDR2-resistant |
| CGGAAGCACGTAGAGACGAGCCGC   | 1  | 18  | RDR2-sensitive |
| CGGAAGCACTCGGCGAAGCCTTAA   | 0  | 21  | RDR2-sensitive |
| CGGAAGCAGCAGAGTCAACGACGT   | 0  | 13  | RDR2-sensitive |
| CGGAAGCGCGGTGACGAAGCTCAA   | 0  | 13  | RDR2-sensitive |
| CGGAAGGAGGCTAGTAGGAACGGT   | 0  | 17  | RDR2-sensitive |
| CGGAAGGAGGTAGAGCTGTACGGG   | 0  | 27  | RDR2-sensitive |
| CGGAAGGCAGAACAAGCAGAGACA   | 0  | 9   | RDR2-sensitive |
| CGGAAGGCAGAACAAGCAGAGGCA   | 1  | 83  | RDR2-sensitive |
| CGGAAGGCCAGGTAGAGCGGTTGG   | 0  | 18  | RDR2-sensitive |
| CGGAAGGCTGTGGATGATCCGGTA   | 0  | 17  | RDR2-sensitive |
| CGGAAGTACGCTGGGATGAGCATC   | 0  | 12  | RDR2-sensitive |
| CGGAAGTATGGAAACGGTGGGCGG   | 0  | 20  | RDR2-sensitive |
| CGGAAGTCTCTCGAGGTCGGCTGC   | 4  | 23  | RDR2-sensitive |
| CGGAAGTGTGGCGCGGCGTGGGGA   | 0  | 11  | RDR2-sensitive |
| CGGAAGTTAGACTGCGGACCGGGC   | 0  | 10  | RDR2-sensitive |
| CGGAATAAGCAGGGTTCGACGACGT  | 1  | 31  | RDR2-sensitive |
| CGGAATAGTAGACGGGGATAGGAC   | 1  | 12  | RDR2-sensitive |
| CGGAATAGTCGGGAACGGAAACGG   | 0  | 100 | RDR2-sensitive |
| CGGAATCAGCAGAGTCGACGACGT   | 1  | 29  | RDR2-sensitive |
| CGGAATCAGCAGGATCGACGACGT   | 0  | 13  | RDR2-sensitive |
| CGGAATCAGCAGGCTCGACGACAT   | 0  | 15  | RDR2-sensitive |
| CGGAATCAGCAGGGTTCGACGACGT  | 3  | 76  | RDR2-sensitive |
| CGGAATCAGCAGGGTTCGACGAGGT  | 0  | 10  | RDR2-sensitive |
| CGGAATCAGCAGGGTTCGACGATGT  | 0  | 30  | RDR2-sensitive |
| CGGAATCAGTAGGGTTCGACGACGT  | 0  | 11  | RDR2-sensitive |
| CGGAATCAGTCGGGGAGCCGGACA   | 0  | 9   | RDR2-sensitive |
| CGGAATCGGGAGCTCCAAGTGGGC   | 31 | 0   | RDR2-resistant |
| CGGAATCGGTATCGGAATCGGCGT   | 3  | 20  | RDR2-sensitive |
| CGGAATGATTCCGAGCCGGATTGT   | 0  | 12  | RDR2-sensitive |
| CGGAATGCTGTAACCTCCACCGGCT  | 0  | 15  | RDR2-sensitive |

|                           |    |    |                |
|---------------------------|----|----|----------------|
| CGGAATGGACAGAACAGGGATGGC  | 0  | 9  | RDR2-sensitive |
| CGGAATGGCAGAACGCGGAATGGC  | 0  | 9  | RDR2-sensitive |
| CGGAATGGGAATGGCAGAACACGG  | 0  | 16 | RDR2-sensitive |
| CGGAATTGGAGAGTGGAGGCGTGT  | 0  | 20 | RDR2-sensitive |
| CGGACAACACGTGACTACGTCTCC  | 0  | 9  | RDR2-sensitive |
| CGGACAACCTGAACCTGAGACCAT  | 0  | 13 | RDR2-sensitive |
| CGGACAAGAACTAGGCACGGTGG   | 0  | 12 | RDR2-sensitive |
| CGGACAATGGCGACGTGCAAACAG  | 1  | 15 | RDR2-sensitive |
| CGGACACAGAATCAAGCATGGCGT  | 2  | 36 | RDR2-sensitive |
| CGGACACATCACCGGCTCGCCCAA  | 0  | 9  | RDR2-sensitive |
| CGGACACATCTCCGGCTCGCCCGA  | 4  | 17 | RDR2-sensitive |
| CGGACACCTGACTCCGGGCGGCTT  | 0  | 10 | RDR2-sensitive |
| CGGACACTCGGCATAGGTAGACAC  | 1  | 13 | RDR2-sensitive |
| CGGACACTGTCCGGTGTGCACCGG  | 1  | 18 | RDR2-sensitive |
| CGGACAGAACAGTCAGCCCCTCGG  | 0  | 12 | RDR2-sensitive |
| CGGACAGAACTGCAGCAGACCAGT  | 14 | 0  | RDR2-resistant |
| CGGACAGAACTGCAGCAGACCGGT  | 1  | 23 | RDR2-sensitive |
| CGGACAGAGAATCAAGCACAGCGT  | 0  | 10 | RDR2-sensitive |
| CGGACAGGAACTAAGCACGACAG   | 0  | 14 | RDR2-sensitive |
| CGGACAGGAACTAAGCCCAGCAC   | 0  | 9  | RDR2-sensitive |
| CGGACAGGAACTAGGCACGGTGG   | 0  | 19 | RDR2-sensitive |
| CGGACAGGAAATTAGGCACGGTGG  | 0  | 10 | RDR2-sensitive |
| CGGACAGGGCACCGGACGGTCCGG  | 24 | 1  | RDR2-resistant |
| CGGACAGTCCGGTGCGCCAGCCAC  | 0  | 9  | RDR2-sensitive |
| CGGACAGTGAACAGTGCAGCGGGCA | 0  | 9  | RDR2-sensitive |
| CGGACATAACAGAAGTGGGCTCAG  | 0  | 10 | RDR2-sensitive |
| CGGACATAACCTACCTCCGACGGT  | 0  | 10 | RDR2-sensitive |
| CGGACATAACCTATCTCCGACGGT  | 0  | 22 | RDR2-sensitive |
| CGGACATAAGCATAGGGCCGTCGG  | 0  | 10 | RDR2-sensitive |
| CGGACATAAGCGCAGGCCGTCGGA  | 0  | 10 | RDR2-sensitive |
| CGGACATAAGCTATCTCCGACGGC  | 0  | 11 | RDR2-sensitive |
| CGGACATAAGGCTACCTCCGACGG  | 0  | 9  | RDR2-sensitive |
| CGGACATAGAGTTATATCGGATGG  | 0  | 14 | RDR2-sensitive |
| CGGACATAGCCTATCTCCGACGGC  | 0  | 9  | RDR2-sensitive |
| CGGACATGTCCGGTGCGCCAACGG  | 2  | 15 | RDR2-sensitive |
| CGGACCAAGAATCCACGATGTCGC  | 0  | 9  | RDR2-sensitive |
| CGGACCAGCGACTGCAGCGAAGGC  | 1  | 40 | RDR2-sensitive |
| CGGACCAGCGACTGCGACGAAGGC  | 0  | 18 | RDR2-sensitive |
| CGGACCAGCGGCTGCAACGAAGGC  | 0  | 10 | RDR2-sensitive |
| CGGACCAGCGGCTGCAGCGAAGGC  | 2  | 20 | RDR2-sensitive |
| CGGACCAGCTGAAGGGTGACGCGT  | 0  | 21 | RDR2-sensitive |
| CGGACCAGGTCCAGACGTCTATAA  | 0  | 28 | RDR2-sensitive |
| CGGACCATGTCTGGCTTAGATCGG  | 0  | 15 | RDR2-sensitive |
| CGGACCCAAAACACCGACAGACGC  | 0  | 12 | RDR2-sensitive |
| CGGACCCAGGAACGTGCGGATCCC  | 0  | 10 | RDR2-sensitive |
| CGGACCCCTGTACATGAAGAACGG  | 0  | 18 | RDR2-sensitive |
| CGGACCCGGTAAGGAGGAGGATA   | 17 | 0  | RDR2-resistant |
| CGGACCCGCTCTGAACCAGACGA   | 0  | 11 | RDR2-sensitive |
| CGGACCCGACCCAAAAGCGGGCT   | 1  | 15 | RDR2-sensitive |

|                           |    |    |                |
|---------------------------|----|----|----------------|
| CGGACCGGACTACCCGACGGACTC  | 0  | 12 | RDR2-sensitive |
| CGGACCGTAGGCCTAGATACGGCC  | 0  | 11 | RDR2-sensitive |
| CGGACCGTCCGAGCATCATCTCAG  | 0  | 11 | RDR2-sensitive |
| CGGACCGTCTGACCTCAGGGCCGG  | 0  | 9  | RDR2-sensitive |
| CGGACCGTGCCGGGCTCGAATCGG  | 0  | 10 | RDR2-sensitive |
| CGGACCGTGCTGGCTCAAGACCGG  | 0  | 12 | RDR2-sensitive |
| CGGACCTTGGATCTAACGGACGGC  | 0  | 11 | RDR2-sensitive |
| CGGACCTTGGGGCCGGCGCCCTTC  | 18 | 0  | RDR2-resistant |
| CGGACCTTGTTGGAGATAGCCTAA  | 0  | 13 | RDR2-sensitive |
| CGGACGAACACCCGCGGCACCGGGC | 0  | 9  | RDR2-sensitive |
| CGGACGAACGGGCCGTACCGGCAC  | 0  | 24 | RDR2-sensitive |
| CGGACGAAGACGTACTACATGCGT  | 0  | 9  | RDR2-sensitive |
| CGGACGAATACGGGGAGGAGACGC  | 0  | 9  | RDR2-sensitive |
| CGGACGAATACGGGGAGGAGGCGC  | 0  | 9  | RDR2-sensitive |
| CGGACGACCTCATGCAGGAGCAGC  | 0  | 13 | RDR2-sensitive |
| CGGACGAGAGGAGGCTAGGAACAG  | 0  | 9  | RDR2-sensitive |
| CGGACGAGATGGATCTGTGACGGT  | 0  | 15 | RDR2-sensitive |
| CGGACGATCTACGATGGCGATGGA  | 0  | 10 | RDR2-sensitive |
| CGGACGCACGCTCTTGCCGATGGC  | 0  | 18 | RDR2-sensitive |
| CGGACGCGGATAGAAGGTAACCAG  | 0  | 9  | RDR2-sensitive |
| CGGACGCTACAGGTAGAGGCACAA  | 0  | 16 | RDR2-sensitive |
| CGGACGGAGGACAGATCGACGCGC  | 4  | 44 | RDR2-sensitive |
| CGGACGGAGGTAGAGCTGTACGGG  | 0  | 10 | RDR2-sensitive |
| CGGACGGCGGACTCGCAGAGTCGC  | 0  | 14 | RDR2-sensitive |
| CGGACGGCTAAGCCCACTGGAG    | 0  | 11 | RDR2-sensitive |
| CGGACGGCTACGATCGCAGAACAG  | 1  | 37 | RDR2-sensitive |
| CGGACGGGATTCGACGAAATGGAG  | 0  | 12 | RDR2-sensitive |
| CGGACGGGCCTGACTGCGGATGAT  | 0  | 9  | RDR2-sensitive |
| CGGACGGTAAAACACGGACGGGCT  | 1  | 65 | RDR2-sensitive |
| CGGACGGTCCGCATACAACGACGG  | 0  | 11 | RDR2-sensitive |
| CGGACGGTCCGCGCATGCGCAGAG  | 2  | 15 | RDR2-sensitive |
| CGGACGGTCCGCGCGTGCAGAG    | 1  | 16 | RDR2-sensitive |
| CGGACGGTCCGCTGTCTGGACGGT  | 0  | 9  | RDR2-sensitive |
| CGGACGGTCTGACCTGTGGATGGT  | 0  | 9  | RDR2-sensitive |
| CGGACGTACATAGAGAAGGAGCCA  | 0  | 10 | RDR2-sensitive |
| CGGACGTACCTGAAGCCAGACGGT  | 1  | 12 | RDR2-sensitive |
| CGGACGTTGTGCCAGTCGCATGGA  | 23 | 1  | RDR2-resistant |
| CGGACGTTGTTGGGCGGAGACCGG  | 0  | 33 | RDR2-sensitive |
| CGGACTACGCTCTGGGCTGGACGG  | 3  | 34 | RDR2-sensitive |
| CGGACTAGCACGGCCCCGAAGTCGA | 0  | 10 | RDR2-sensitive |
| CGGACTAGCATTGTTCGAAGGCGT  | 0  | 9  | RDR2-sensitive |
| CGGACTATCTGGCGTAACGCGCAG  | 0  | 16 | RDR2-sensitive |
| CGGACTATTTTCGTCCGCCGCCCC  | 2  | 34 | RDR2-sensitive |
| CGGACTCATCAGGGCATCCTCCAC  | 0  | 31 | RDR2-sensitive |
| CGGACTCCTCTGGCTGGCACGCAC  | 0  | 9  | RDR2-sensitive |
| CGGACTCGGTCAAGGCCAGACGAC  | 0  | 9  | RDR2-sensitive |
| CGGACTCGTTCTGAACGTCGAGCT  | 0  | 11 | RDR2-sensitive |
| CGGACTCTCGCACTCGCACGGTAA  | 0  | 9  | RDR2-sensitive |
| CGGACTCTGTAGGGTGTGCACGGT  | 0  | 18 | RDR2-sensitive |

|                           |    |    |                |
|---------------------------|----|----|----------------|
| CGGACTGACGGCGCGACGGCCAAA  | 59 | 11 | RDR2-resistant |
| CGGACTGATCTATTAGAAGGGCCC  | 19 | 0  | RDR2-resistant |
| CGGACTGGAAGCCCGGTACGGCCT  | 0  | 10 | RDR2-sensitive |
| CGGACTGGCGACTACAACGAAGGC  | 0  | 9  | RDR2-sensitive |
| CGGACTGTCCGGTGAGCCAACGGT  | 65 | 97 | RDR2-sensitive |
| CGGACTGTCCGGTGCACCATCGAA  | 28 | 3  | RDR2-resistant |
| CGGACTGTCCGGTGCACCCGACGA  | 3  | 17 | RDR2-sensitive |
| CGGACTGTCCGGTGCGCCAGGCGA  | 4  | 21 | RDR2-sensitive |
| CGGACTGTCCGGTGCGCCCATCGA  | 0  | 20 | RDR2-sensitive |
| CGGACTGTCCGGTGCGCCCATCGC  | 2  | 17 | RDR2-sensitive |
| CGGACTGTCCGGTGCGCCCGACGA  | 4  | 19 | RDR2-sensitive |
| CGGACTGTCCGGTGCGCCCGTCGA  | 0  | 14 | RDR2-sensitive |
| CGGACTGTCCGGTGTGCCACCGAA  | 4  | 20 | RDR2-sensitive |
| CGGACTGTCCGGTGTGCCAGCGGA  | 13 | 38 | RDR2-sensitive |
| CGGACTGTCCGGTGTGCCCATCGA  | 2  | 15 | RDR2-sensitive |
| CGGACTGTTAGGTGTACCACCCGA  | 0  | 23 | RDR2-sensitive |
| CGGACTGTTTCGTCATAGCGTGCGT | 0  | 10 | RDR2-sensitive |
| CGGACTTAGGTCGGTATGGTACAA  | 0  | 13 | RDR2-sensitive |
| CGGACTTCGGAGTGTGTACGCGGA  | 0  | 13 | RDR2-sensitive |
| CGGAGAACAAGACCGGCGTCCCAT  | 2  | 17 | RDR2-sensitive |
| CGGAGAAGACCAAGGACGAAACAG  | 0  | 17 | RDR2-sensitive |
| CGGAGAAGACCAAGGATGAGGCAC  | 0  | 14 | RDR2-sensitive |
| CGGAGAAGCCCTCTTGATCTACGT  | 1  | 12 | RDR2-sensitive |
| CGGAGAAGGACACGACGAAGACAT  | 5  | 21 | RDR2-sensitive |
| CGGAGAAGGACACGACGAAGACCT  | 0  | 14 | RDR2-sensitive |
| CGGAGAAGGAGGTAGCAACAGAAA  | 0  | 9  | RDR2-sensitive |
| CGGAGACAAAACGGGCAGGGACAC  | 5  | 28 | RDR2-sensitive |
| CGGAGACAACATGTAGGGACCGGC  | 0  | 31 | RDR2-sensitive |
| CGGAGACAGGACCGAGCACGACAG  | 0  | 13 | RDR2-sensitive |
| CGGAGACAGTAGAGGCAGAACCGA  | 0  | 14 | RDR2-sensitive |
| CGGAGACGGATACGGAGAGGAGAG  | 0  | 9  | RDR2-sensitive |
| CGGAGACGGTGGGCCACCATGAGG  | 22 | 0  | RDR2-resistant |
| CGGAGACGTCAAACACGGGAACGA  | 0  | 12 | RDR2-sensitive |
| CGGAGACTGAGCCAGACGGATGGT  | 0  | 65 | RDR2-sensitive |
| CGGAGACTGAGTCAGACGAGTGGT  | 0  | 25 | RDR2-sensitive |
| CGGAGACTGCATGGAGTGCGCTAG  | 1  | 14 | RDR2-sensitive |
| CGGAGACTGCATGGAGTGCGCTAT  | 1  | 48 | RDR2-sensitive |
| CGGAGACTGCATGGAGTGTGCTAT  | 0  | 13 | RDR2-sensitive |
| CGGAGACTGTATGGAGTGCGCTAT  | 0  | 72 | RDR2-sensitive |
| CGGAGAGCGCACTGAGAGAGACGA  | 0  | 17 | RDR2-sensitive |
| CGGAGAGGAGTAGAACGGTTCCAT  | 0  | 17 | RDR2-sensitive |
| CGGAGATAAGACACTGCCGTCCGA  | 0  | 12 | RDR2-sensitive |
| CGGAGATAAGGCTTTGCCGTCCGA  | 0  | 14 | RDR2-sensitive |
| CGGAGATACTAGAGCCGCTGCCGG  | 5  | 32 | RDR2-sensitive |
| CGGAGATAGGAAAGGCAGAACCAG  | 0  | 27 | RDR2-sensitive |
| CGGAGATGGACTAGAGCGCGGTGA  | 0  | 9  | RDR2-sensitive |
| CGGAGATGTCACGTAGGGACTGGC  | 0  | 9  | RDR2-sensitive |
| CGGAGATTGCAGTCCACAGCCATT  | 15 | 0  | RDR2-resistant |
| CGGAGCAGACGTAGTGCGCGGCGA  | 0  | 9  | RDR2-sensitive |

|                          |    |    |                |
|--------------------------|----|----|----------------|
| CGGAGCCAGCAACGTGATATTCAT | 0  | 12 | RDR2-sensitive |
| CGGAGCCTGACCGAGAAAGGACAC | 0  | 38 | RDR2-sensitive |
| CGGAGCCTGTAGTTCGGCAAGGAA | 0  | 14 | RDR2-sensitive |
| CGGAGCGGACTCTTGTCGGTGGGT | 21 | 0  | RDR2-resistant |
| CGGAGCGGCTGCAGGTTTCTCGCC | 0  | 14 | RDR2-sensitive |
| CGGAGCGTGACTGTGAGAGCGGGA | 0  | 18 | RDR2-sensitive |
| CGGAGCTCCGACACGGCAGTACGT | 0  | 12 | RDR2-sensitive |
| CGGAGCTCTCAGCCAGAAAATGGT | 0  | 12 | RDR2-sensitive |
| CGGAGCTGAGGACAAGTCGGCGTT | 24 | 2  | RDR2-resistant |
| CGGAGCTGTACACCGGCACGACAA | 0  | 9  | RDR2-sensitive |
| CGGAGCTGTTGACCAGGTGGGGCC | 16 | 0  | RDR2-resistant |
| CGGAGCTGTTTACCAGGACGTCGT | 0  | 9  | RDR2-sensitive |
| CGGAGCTTTGCGACCTGATAGCGG | 31 | 2  | RDR2-resistant |
| CGGAGGAATGTTTTTATAGCGGCG | 18 | 0  | RDR2-resistant |
| CGGAGGACCAGAGCAGCAGACAGC | 0  | 9  | RDR2-sensitive |
| CGGAGGACCTGCCGGCTTGACGAA | 3  | 28 | RDR2-sensitive |
| CGGAGGACCTGCCGGCTTGACGGA | 6  | 77 | RDR2-sensitive |
| CGGAGGACCTGTAGAGACGGAGCG | 0  | 10 | RDR2-sensitive |
| CGGAGGACTGGACAGAGGTGGATG | 86 | 9  | RDR2-resistant |
| CGGAGGACTTGCCGGCGTGATGGA | 0  | 10 | RDR2-sensitive |
| CGGAGGAGGACCTCAAGAAGTCGT | 0  | 10 | RDR2-sensitive |
| CGGAGGATATGATGTGTAGTCGGG | 25 | 0  | RDR2-resistant |
| CGGAGGCAAAGCGGGCAGGGACAC | 6  | 21 | RDR2-sensitive |
| CGGAGGCAGAACACAAAAAGGCAG | 0  | 9  | RDR2-sensitive |
| CGGAGGCAGAACAGCCGTTGGCAG | 0  | 15 | RDR2-sensitive |
| CGGAGGCAGAACGGCAGAACGGGT | 2  | 17 | RDR2-sensitive |
| CGGAGGCAGAACGGTCAGAGACAG | 0  | 19 | RDR2-sensitive |
| CGGAGGCAGACCAAACGTAGGCA  | 22 | 0  | RDR2-resistant |
| CGGAGGCATCACGTAGGGACTAGC | 1  | 12 | RDR2-sensitive |
| CGGAGGCTGAGTCAGACGTGTGGT | 0  | 9  | RDR2-sensitive |
| CGGAGGCTTGTTGGAAAAGTGCAC | 0  | 10 | RDR2-sensitive |
| CGGAGGGACGGCAGAACCGTGCGC | 0  | 12 | RDR2-sensitive |
| CGGAGGGACTCAAGAACGCCGGAT | 31 | 3  | RDR2-resistant |
| CGGAGGGCAGAACTGTACGCGCGC | 0  | 53 | RDR2-sensitive |
| CGGAGGGGACGACGCCACGATGGC | 62 | 6  | RDR2-resistant |
| CGGAGGTAGAACCACCGGCGCTGC | 1  | 12 | RDR2-sensitive |
| CGGAGGTGTGGGCATAAGAGGAAG | 0  | 23 | RDR2-sensitive |
| CGGAGTAGACTGGAAACGAGCCGA | 0  | 29 | RDR2-sensitive |
| CGGAGTAGCTGACGTGGACGGTGA | 0  | 13 | RDR2-sensitive |
| CGGAGTCAGATCTGGGAATGCGGG | 0  | 14 | RDR2-sensitive |
| CGGAGTCATCACGTAGGGACTGGC | 0  | 13 | RDR2-sensitive |
| CGGAGTCATGTGGACGGAGTCGAG | 0  | 9  | RDR2-sensitive |
| CGGAGTGACTGGAATCGCTGTGAC | 0  | 11 | RDR2-sensitive |
| CGGAGTGATTTTTAGAGACAGCGT | 0  | 20 | RDR2-sensitive |
| CGGAGTGATTTTTGGGGACAGCGT | 0  | 9  | RDR2-sensitive |
| CGGAGTGGACTGTGTAAGCGGATG | 0  | 25 | RDR2-sensitive |
| CGGAGTTAGACGAGTGGTGGATGT | 0  | 12 | RDR2-sensitive |
| CGGAGTTAGACGGGTGACAGACAA | 0  | 40 | RDR2-sensitive |
| CGGAGTTAGACGGGTGATAGACAA | 0  | 38 | RDR2-sensitive |



|                          |     |     |                |
|--------------------------|-----|-----|----------------|
| CGGAGTTGGGAATGGGAATGGCAG | 0   | 11  | RDR2-sensitive |
| CGGAGTTGTCGCCGGAGTTGGAAC | 0   | 27  | RDR2-sensitive |
| CGGATAAACACTAGAGGCGCGGAT | 0   | 9   | RDR2-sensitive |
| CGGATAAGCAGAACCAGGCTCAAC | 0   | 40  | RDR2-sensitive |
| CGGATACAGGTAGGATACGGAATC | 0   | 9   | RDR2-sensitive |
| CGGATACGGATACAGGGACCGGAT | 2   | 27  | RDR2-sensitive |
| CGGATACGGATACTGATTCGGGAC | 1   | 65  | RDR2-sensitive |
| CGGATACGGGTACCCAGAATTCGG | 0   | 9   | RDR2-sensitive |
| CGGATACGGGTACGAAAACGGGAC | 0   | 11  | RDR2-sensitive |
| CGGATACGGGTACTGATTCGGGAC | 1   | 37  | RDR2-sensitive |
| CGGATACGGGTAGGATACGGAATC | 0   | 69  | RDR2-sensitive |
| CGGATACGGGTAGGATACGGGATG | 0   | 19  | RDR2-sensitive |
| CGGATACGGGTAGGATACGTGATA | 0   | 9   | RDR2-sensitive |
| CGGATACGGGTAGTTAAGAATCGG | 0   | 9   | RDR2-sensitive |
| CGGATACGGGTAGTTAAGATTCGG | 0   | 10  | RDR2-sensitive |
| CGGATACTTTTGGGGCACCTGGCA | 17  | 1   | RDR2-resistant |
| CGGATAGAGAATCAAGCACGGCGT | 0   | 14  | RDR2-sensitive |
| CGGATAGGAACTAAGCACGGTGAG | 0   | 12  | RDR2-sensitive |
| CGGATAGGGGCATTCGAGGCGGAT | 362 | 14  | RDR2-resistant |
| CGGATAGGGGCATTCGAGGCGGGT | 24  | 0   | RDR2-resistant |
| CGGATAGTATTTTGATGTAGTCGG | 0   | 14  | RDR2-sensitive |
| CGGATAGTTAGAAACGGGACGGAT | 2   | 281 | RDR2-sensitive |
| CGGATAGTTAGAAACGGGACGGCT | 0   | 10  | RDR2-sensitive |
| CGGATAGTTAGAAACGGGGCGGAT | 0   | 17  | RDR2-sensitive |
| CGGATAGTTGAAACGGGACGGAT  | 0   | 11  | RDR2-sensitive |
| CGGATATAACTCCCGAGGACGACC | 0   | 45  | RDR2-sensitive |
| CGGATATAGTTGGTGGACGGAGGC | 0   | 9   | RDR2-sensitive |
| CGGATATCTTATCTGAATAGTCGT | 0   | 10  | RDR2-sensitive |
| CGGATATGACTCGGCGAGCCCGGC | 0   | 10  | RDR2-sensitive |
| CGGATATGACTGGACGGAACCCGG | 0   | 9   | RDR2-sensitive |
| CGGATATTCGGGTCGGATACGGGT | 2   | 21  | RDR2-sensitive |
| CGGATCAAGCTCAGCCGGATACGG | 0   | 9   | RDR2-sensitive |
| CGGATCACTCTGGATGAAGCGAAC | 0   | 9   | RDR2-sensitive |
| CGGATCAGGTCTAGACGTCTATAA | 0   | 9   | RDR2-sensitive |
| CGGATCATCAGGCAGGAACACCAA | 0   | 18  | RDR2-sensitive |
| CGGATCATGGAGCGTTTAGCACGG | 0   | 16  | RDR2-sensitive |
| CGGATCCCTCTGGATAGATCGCGT | 0   | 19  | RDR2-sensitive |
| CGGATCCGCATAGAACCGTGTCGT | 0   | 19  | RDR2-sensitive |
| CGGATCCGGAGGGCAGTATACCAG | 0   | 13  | RDR2-sensitive |
| CGGATCGACTCCCCTGCAGGGCTG | 20  | 0   | RDR2-resistant |
| CGGATCGAGCTCAGCCAGATACGG | 1   | 63  | RDR2-sensitive |
| CGGATCGATAGAAGGCAGAACCGT | 0   | 9   | RDR2-sensitive |
| CGGATCGATATCGCCTAGGGACGC | 0   | 10  | RDR2-sensitive |
| CGGATCGGAGGATGTCACGCGCGA | 0   | 10  | RDR2-sensitive |
| CGGATCGGATACGCATCGAAACGG | 0   | 39  | RDR2-sensitive |
| CGGATCGGATACGCATGGAAACAG | 0   | 13  | RDR2-sensitive |
| CGGATCGGATACGCATGGAAACGG | 0   | 58  | RDR2-sensitive |
| CGGATCGGGCTTGCCGAGCGGCTC | 2   | 17  | RDR2-sensitive |
| CGGATCGTAGGCGCAGAGGCTGGT | 0   | 9   | RDR2-sensitive |

|                           |    |     |                |
|---------------------------|----|-----|----------------|
| CGGATCTAGACGACGTAGAGTCAA  | 1  | 13  | RDR2-sensitive |
| CGGATCTGAGGATGCCGTCGACGG  | 0  | 11  | RDR2-sensitive |
| CGGATCTGCGGCGCTCGGAGCCGG  | 1  | 14  | RDR2-sensitive |
| CGGATCTGGGCCTCTGCGACACGG  | 0  | 10  | RDR2-sensitive |
| CGGATCTGGGCTGTGGCGCAGAGA  | 0  | 15  | RDR2-sensitive |
| CGGATCTGGGAAGACGGGGCGC    | 0  | 18  | RDR2-sensitive |
| CGGATCTTGGCAACAACACGGACA  | 0  | 12  | RDR2-sensitive |
| CGGATGAACGCACAGTAACGGGT   | 0  | 10  | RDR2-sensitive |
| CGGATGACCGAGGCATGCACTGAA  | 0  | 13  | RDR2-sensitive |
| CGGATGACTCCAGAAGCAGTCCAA  | 0  | 20  | RDR2-sensitive |
| CGGATGACTCTGGAAGCAGTCCAA  | 1  | 16  | RDR2-sensitive |
| CGGATGCAGAGCCCTCCTCGGCGT  | 0  | 10  | RDR2-sensitive |
| CGGATGCATGAGCCAGGTCGACGG  | 0  | 19  | RDR2-sensitive |
| CGGATGCCCGCAGGAGCTCGGCGAG | 0  | 9   | RDR2-sensitive |
| CGGATGGAAGTAGCAGAATGGCAG  | 0  | 10  | RDR2-sensitive |
| CGGATGGCATTGAAGGGGACTGGT  | 0  | 10  | RDR2-sensitive |
| CGGATGGGGGCTGGCGACGCGCAC  | 41 | 3   | RDR2-resistant |
| CGGATGGTCTGGCCCTGAGGACGG  | 0  | 9   | RDR2-sensitive |
| CGGATGTACCGAGCCAACAAAGAC  | 0  | 21  | RDR2-sensitive |
| CGGATGTACGGAGCCAACAAAGAC  | 0  | 18  | RDR2-sensitive |
| CGGATGTAGAGACGACGTGAGTAT  | 23 | 2   | RDR2-resistant |
| CGGATGTAGGGACGTGCAGCCCAA  | 0  | 12  | RDR2-sensitive |
| CGGATGTCCTGCCGATCTCGGAGC  | 0  | 14  | RDR2-sensitive |
| CGGATGTGAAGGCCTACACTACTA  | 0  | 9   | RDR2-sensitive |
| CGGATGTTACTCAAGCGTCGACAC  | 0  | 9   | RDR2-sensitive |
| CGGATGTTGTTGGACGCGTACCGA  | 0  | 21  | RDR2-sensitive |
| CGGATTAGAACCGTGCCGGTCCGG  | 0  | 11  | RDR2-sensitive |
| CGGATTAGCACGGCCTGAAGACAG  | 2  | 45  | RDR2-sensitive |
| CGGATTAGTAGGCTAGATGGTCGT  | 0  | 17  | RDR2-sensitive |
| CGGATTATGCTAGACTGGAGGCAC  | 3  | 112 | RDR2-sensitive |
| CGGATTCATTGACTCGTCGTCCGT  | 31 | 3   | RDR2-resistant |
| CGGATTCGGCGAGGGCCTCGGCGT  | 3  | 22  | RDR2-sensitive |
| CGGATTCGTAGAGCCTAAAGGCGT  | 0  | 19  | RDR2-sensitive |
| CGGATTCGTAGAGCCTGAAGACGT  | 0  | 10  | RDR2-sensitive |
| CGGATTCGTAGAGCCTGAAGGCGT  | 1  | 29  | RDR2-sensitive |
| CGGATTGACGGAGAGTTGATGCAG  | 2  | 24  | RDR2-sensitive |
| CGGATTGAGACCATGCCGGTTCAG  | 0  | 10  | RDR2-sensitive |
| CGGATTGCACCCGGAATCGTTCCA  | 0  | 14  | RDR2-sensitive |
| CGGATTGCACTGTCTGGCCTGGGC  | 1  | 23  | RDR2-sensitive |
| CGGATTGCAGCCGCAGCAAGCCGC  | 1  | 34  | RDR2-sensitive |
| CGGATTGCGACGCATTTACGGCCC  | 0  | 12  | RDR2-sensitive |
| CGGATTGGTGCAAACCCGGACGGC  | 4  | 22  | RDR2-sensitive |
| CGGATTGGTGCAAACCCGGACGGT  | 0  | 10  | RDR2-sensitive |
| CGGATTGTAGCCGCAGCAAGCCGC  | 2  | 51  | RDR2-sensitive |
| CGGATTGTCCGCTCACAGGGCCGG  | 3  | 39  | RDR2-sensitive |
| CGGATTGTGCGTACAGGGGTCCGG  | 0  | 9   | RDR2-sensitive |
| CGGATTTCCGGTAGCGGCTACCCAT | 1  | 33  | RDR2-sensitive |
| CGGATTTCCGGTAGTAGTTGCGGGA | 0  | 9   | RDR2-sensitive |
| CGGATTTCTCCCTCGCAGTCGGTT  | 0  | 12  | RDR2-sensitive |

|                            |   |     |                |
|----------------------------|---|-----|----------------|
| CGGATTTGACTGCGATGGCGGCTT   | 0 | 9   | RDR2-sensitive |
| CGGATTTGCTCTCAACGGCTCCTA   | 0 | 9   | RDR2-sensitive |
| CGGATTTGGCTTGTCGGGCGGCC    | 0 | 16  | RDR2-sensitive |
| CGGATTTGTAAGCACGAAGCCCGG   | 0 | 11  | RDR2-sensitive |
| CGGATTTTACTGGCACGGCCCTGA   | 0 | 9   | RDR2-sensitive |
| CGGCAAACGTACATCGGCAACAG    | 0 | 9   | RDR2-sensitive |
| CGGCAAAGAACAACCTCGGCAAAGAT | 3 | 21  | RDR2-sensitive |
| CGGCAAAGAACCAAGACCTGGGCA   | 0 | 10  | RDR2-sensitive |
| CGGCAAAGAACGCGATTCCGGTAG   | 7 | 43  | RDR2-sensitive |
| CGGCAAAGAAGACTCGGCAAACAG   | 0 | 14  | RDR2-sensitive |
| CGGCAAAGAAGGCTCGACAAACAG   | 0 | 9   | RDR2-sensitive |
| CGGCAAAGAAGGCTCGGCAAACAA   | 0 | 13  | RDR2-sensitive |
| CGGCAAAGAAGGCTCGGCAAACAG   | 9 | 222 | RDR2-sensitive |
| CGGCAAAGAAGGCTCGGCACACAG   | 1 | 16  | RDR2-sensitive |
| CGGCAAAGAAGTCTCGGCACGCGAG  | 0 | 11  | RDR2-sensitive |
| CGGCAAAGAATCGATCGGTCGCGT   | 0 | 9   | RDR2-sensitive |
| CGGCAAAGAGCACAGACCTGGGCA   | 1 | 24  | RDR2-sensitive |
| CGGCAAAGAGGAACCTGACGGCGC   | 2 | 15  | RDR2-sensitive |
| CGGCAAAGAGGACACACAATGCAT   | 0 | 29  | RDR2-sensitive |
| CGGCAAAGAGGGCTCGACATACAG   | 0 | 15  | RDR2-sensitive |
| CGGCAAAGCCTCGGATTCCGGTAG   | 0 | 9   | RDR2-sensitive |
| CGGCAAAGGCTATTTTACTCTCGG   | 2 | 32  | RDR2-sensitive |
| CGGCAACGAGCCTCTTTACCGAGT   | 0 | 9   | RDR2-sensitive |
| CGGCAACGAGCTCAGGGAAGGTGT   | 1 | 12  | RDR2-sensitive |
| CGGCAATCGGACGGTTGAGATGGA   | 0 | 9   | RDR2-sensitive |
| CGGCACAACCTAGACTGGCAGGGGC  | 0 | 11  | RDR2-sensitive |
| CGGCACACACAAGCTCGGCGCCAA   | 1 | 44  | RDR2-sensitive |
| CGGCACACACAGGCTCGGCGCCAA   | 0 | 9   | RDR2-sensitive |
| CGGCACACAGAAGCTCGGCGCCAA   | 2 | 138 | RDR2-sensitive |
| CGGCACACAGAAGCTCGGCGCCCA   | 0 | 10  | RDR2-sensitive |
| CGGCACAGAGAAGCTCGGCGCCAA   | 1 | 24  | RDR2-sensitive |
| CGGCACAGATCTGGCACGACCCAA   | 0 | 19  | RDR2-sensitive |
| CGGCACAGGACGACACTCGGCAA    | 1 | 18  | RDR2-sensitive |
| CGGCACAGTAGAATAAGCGGACGG   | 2 | 108 | RDR2-sensitive |
| CGGCACAGTAGAATAAGCGGGCGG   | 0 | 10  | RDR2-sensitive |
| CGGCACATGGAAGCTCGGCGCCAA   | 2 | 67  | RDR2-sensitive |
| CGGCACATGGGTTAGAGAACGGCG   | 0 | 13  | RDR2-sensitive |
| CGGCACCACTGTTGGGCTGTCGGC   | 0 | 9   | RDR2-sensitive |
| CGGCACCGAGGAAAATGACAGCAG   | 0 | 10  | RDR2-sensitive |
| CGGCACGAACTCGGCACGACACAT   | 0 | 9   | RDR2-sensitive |
| CGGCACGACACGGGCACGATTCAT   | 0 | 15  | RDR2-sensitive |
| CGGCACGACACGGGCATGATTCAT   | 0 | 9   | RDR2-sensitive |
| CGGCACGACACTGTTAGGGCACGG   | 0 | 13  | RDR2-sensitive |
| CGGCACGACGGCTAAGTGAACACTAC | 0 | 10  | RDR2-sensitive |
| CGGCACGACTAACAGACTCACGGG   | 0 | 29  | RDR2-sensitive |
| CGGCACGACTAACAGGCTCACGGA   | 0 | 19  | RDR2-sensitive |
| CGGCACGACTAACAGGCTCACGGG   | 0 | 16  | RDR2-sensitive |
| CGGCACGACTAGACGAAGGCACGA   | 0 | 17  | RDR2-sensitive |
| CGGCACGACTAGCAAACCTGACGGA  | 0 | 13  | RDR2-sensitive |

|                           |    |      |                |
|---------------------------|----|------|----------------|
| CGGCACGACTAGCAGGCTGACGGG  | 0  | 27   | RDR2-sensitive |
| CGGCACGATAGAATAAGCGGGCAG  | 0  | 25   | RDR2-sensitive |
| CGGCACGATAGAATAAGCGGGCGG  | 1  | 37   | RDR2-sensitive |
| CGGCACGATTCTGGCCCGGTCCAA  | 0  | 15   | RDR2-sensitive |
| CGGCACGCAGCACACAGAGGACGC  | 0  | 11   | RDR2-sensitive |
| CGGCACGCCGACCCATCTGGGCAC  | 0  | 12   | RDR2-sensitive |
| CGGCACGCTGTTGACTCGGGCCGT  | 0  | 41   | RDR2-sensitive |
| CGGCACGCTGTTGACTCGGGTCGT  | 2  | 76   | RDR2-sensitive |
| CGGCACGCTGTTGCATCGGGCTGT  | 0  | 23   | RDR2-sensitive |
| CGGCACGGATATGACTGGACGGAA  | 0  | 13   | RDR2-sensitive |
| CGGCACGGCACGGCACTGACACGA  | 0  | 23   | RDR2-sensitive |
| CGGCACGGCACTGGCACTAGCACG  | 2  | 19   | RDR2-sensitive |
| CGGCACGGCCTGTTCTATGCGGG   | 0  | 13   | RDR2-sensitive |
| CGGCACGGGTACGACTGGGCACGG  | 0  | 18   | RDR2-sensitive |
| CGGCACGGTAAATTGGGCTGGCAC  | 0  | 9    | RDR2-sensitive |
| CGGCACGGTACGAACAAGCGGGCG  | 0  | 12   | RDR2-sensitive |
| CGGCACGGTAGAATAAACGGGCGG  | 0  | 127  | RDR2-sensitive |
| CGGCACGGTAGAATAAGCGGACGG  | 5  | 246  | RDR2-sensitive |
| CGGCACGGTAGAATAAGCGGGCAA  | 0  | 11   | RDR2-sensitive |
| CGGCACGGTAGAATAAGCGGGCAG  | 2  | 127  | RDR2-sensitive |
| CGGCACGGTAGAATAAGCGGGCCG  | 0  | 13   | RDR2-sensitive |
| CGGCACGGTAGAATAAGCGGGCGA  | 0  | 50   | RDR2-sensitive |
| CGGCACGGTAGAATAAGCGGGCGC  | 0  | 31   | RDR2-sensitive |
| CGGCACGGTAGAATAAGCGGGCGG  | 12 | 1543 | RDR2-sensitive |
| CGGCACGGTAGAATAAGCGGGCGT  | 0  | 64   | RDR2-sensitive |
| CGGCACGGTAGAATAAGTGGACGG  | 1  | 291  | RDR2-sensitive |
| CGGCACGGTAGAATAAGTGGGCGG  | 0  | 97   | RDR2-sensitive |
| CGGCACGTAGTGAACCGGGTTCGT  | 0  | 57   | RDR2-sensitive |
| CGGCACTAAAAGCACGGCACTGG   | 0  | 14   | RDR2-sensitive |
| CGGCACTATTAATTGTCGGGCCGT  | 0  | 18   | RDR2-sensitive |
| CGGCACTATTTGGACCGGACCGAA  | 0  | 11   | RDR2-sensitive |
| CGGCACTCTAGTTGAAGAAGGTTA  | 42 | 5    | RDR2-resistant |
| CGGCACTGATAATTTGTTCCGGCGT | 0  | 26   | RDR2-sensitive |
| CGGCACTGATACGATTGGACACGG  | 0  | 28   | RDR2-sensitive |
| CGGCACTGCGGGCCGAGACAGCGG  | 1  | 14   | RDR2-sensitive |
| CGGCACTGGCACGGCATGACACGT  | 0  | 22   | RDR2-sensitive |
| CGGCACTGTAGGTCGGCTTGCCTA  | 0  | 19   | RDR2-sensitive |
| CGGCACTGTAGGTCGGCTTGCCTG  | 1  | 25   | RDR2-sensitive |
| CGGCACTGTAGGTCGGCTTGCCTT  | 0  | 28   | RDR2-sensitive |
| CGGCACTGTGGGCCGAGACAGCGG  | 1  | 19   | RDR2-sensitive |
| CGGCACTGTTTTTAGGACGGGCTA  | 0  | 26   | RDR2-sensitive |
| CGGCAGAACGGCAGAACACGTCAG  | 0  | 13   | RDR2-sensitive |
| CGGCAGAACGGCAGAACGCGTCAG  | 0  | 13   | RDR2-sensitive |
| CGGCAGAACGGCAGAACGGCAGAC  | 0  | 10   | RDR2-sensitive |
| CGGCAGAACGGCAGAACTTGTCAG  | 0  | 14   | RDR2-sensitive |
| CGGCAGAACGGCAGACTACTCTTA  | 0  | 12   | RDR2-sensitive |
| CGGCAGACACACGTAGCTCAGCAC  | 0  | 11   | RDR2-sensitive |
| CGGCAGACGGGAATACTGAGTCGA  | 0  | 10   | RDR2-sensitive |
| CGGCAGACTACGCTAGATACCTCT  | 0  | 21   | RDR2-sensitive |

|                           |     |     |                |
|---------------------------|-----|-----|----------------|
| CGGCAGACTCAGAGGTGTAGAGAA  | 0   | 13  | RDR2-sensitive |
| CGGCAGCCTGAATCGAGGATTCGC  | 1   | 14  | RDR2-sensitive |
| CGGCAGCGGCTCTAGTATCTCCGT  | 0   | 11  | RDR2-sensitive |
| CGGCAGCTACGACATGATACTCCT  | 5   | 19  | RDR2-sensitive |
| CGGCAGCTGAAGGAGAAGGGTCAC  | 0   | 11  | RDR2-sensitive |
| CGGCAGGAGAGGTATTGAAGACAA  | 0   | 11  | RDR2-sensitive |
| CGGCAGTAGAGTTCTCGGCTGCAG  | 0   | 9   | RDR2-sensitive |
| CGGCAGTCTGGCTGTGCATCGCGT  | 0   | 13  | RDR2-sensitive |
| CGGCAGTGCTCTCTGCACAGGCGC  | 0   | 16  | RDR2-sensitive |
| CGGCAGTGCTCTCTGGTCAGGCGC  | 2   | 24  | RDR2-sensitive |
| CGGCAGTGTCTTATCTCCGACGGT  | 1   | 13  | RDR2-sensitive |
| CGGCATAGATCTAGCACGGCCAA   | 0   | 9   | RDR2-sensitive |
| CGGCATATCCAGACACTCGGCGAA  | 0   | 15  | RDR2-sensitive |
| CGGCATATCCTGTGGTTGGCTCAG  | 0   | 9   | RDR2-sensitive |
| CGGCATCGTAGACAGCCGTCCGAG  | 0   | 16  | RDR2-sensitive |
| CGGCATGATACTGAACCGTGGCTT  | 0   | 9   | RDR2-sensitive |
| CGGCATGCCGTGCCTGGACCACGA  | 0   | 18  | RDR2-sensitive |
| CGGCATGGACACAAGCTGACGACG  | 0   | 15  | RDR2-sensitive |
| CGGCATGGACTGCGGCAGTGCTCC  | 0   | 10  | RDR2-sensitive |
| CGGCATGGTAGAATAAGCGGGCGG  | 0   | 30  | RDR2-sensitive |
| CGGCATGGTGTGCCTAGATCACGG  | 0   | 12  | RDR2-sensitive |
| CGGCATGGTTAAATGGGCTGGCAC  | 0   | 9   | RDR2-sensitive |
| CGGCATGTAGTCGTACACGAGCAC  | 0   | 10  | RDR2-sensitive |
| CGGCATGTAGTCGTACACGAGCAT  | 1   | 103 | RDR2-sensitive |
| CGGCATTAACCTCCAACTAACGGT  | 27  | 1   | RDR2-resistant |
| CGGCATTCTGACGACCTGCACGGC  | 0   | 11  | RDR2-sensitive |
| CGGCCAGGAGTAGGACGCGAGGTA  | 14  | 0   | RDR2-resistant |
| CGGCCATCCTGGACTCGACGTCAT  | 0   | 12  | RDR2-sensitive |
| CGGCCATGGTGTAGAAGCGACGGC  | 1   | 16  | RDR2-sensitive |
| CGGCCATGGTGTAGAAGCGACGGT  | 0   | 12  | RDR2-sensitive |
| CGGCCATTGAGAGTGACGGAACAT  | 0   | 22  | RDR2-sensitive |
| CGGCCAACCTGAACCATTAACGG   | 0   | 15  | RDR2-sensitive |
| CGGCCCACTTTTATACGGACTCGG  | 0   | 11  | RDR2-sensitive |
| CGGCCCAGCGTGCCTGATGCTCGG  | 0   | 13  | RDR2-sensitive |
| CGGCCCATGTAGAGTCGACGTGAG  | 0   | 18  | RDR2-sensitive |
| CGGCCCGAGACCGCATAGAACCGG  | 0   | 9   | RDR2-sensitive |
| CGGCCCGATCTGAGCCTGGCACGG  | 0   | 11  | RDR2-sensitive |
| CGGCCCGCCAACCCTGGAATCGGT  | 15  | 0   | RDR2-resistant |
| CGGCCCGGACACGACAGACGACAC  | 0   | 10  | RDR2-sensitive |
| CGGCCCGGGACCGCATAGAATCAG  | 0   | 18  | RDR2-sensitive |
| CGGCCCGGGCACGCCTCTAGTCGG  | 0   | 18  | RDR2-sensitive |
| CGGCCCGTAGTGCCTGGGCACGGC  | 0   | 49  | RDR2-sensitive |
| CGGCCCTGAGGGTGGACTGTTCGC  | 1   | 20  | RDR2-sensitive |
| CGGCCGAACCTCCAGATGTAGCGTC | 0   | 9   | RDR2-sensitive |
| CGGCCGACAGACTGAACCACCGGC  | 0   | 26  | RDR2-sensitive |
| CGGCCGTCCACGACAGTACGCATG  | 0   | 9   | RDR2-sensitive |
| CGGCCGTTTCTCTGGATGCAGGCT  | 0   | 21  | RDR2-sensitive |
| CGGCCTAAAGCACGGACTGTTCGG  | 1   | 23  | RDR2-sensitive |
| CGGCCTAGCCGTGGCCGGTCGGCA  | 145 | 0   | RDR2-resistant |

|                            |    |      |                |
|----------------------------|----|------|----------------|
| CGGCCTAGCCGTGGCCGGTCGGCC   | 19 | 0    | RDR2-resistant |
| CGGCCTCGTAGCTCGGCGCCACAG   | 2  | 82   | RDR2-sensitive |
| CGGCCTCGTAGGAAGCCGTCTGGAG  | 0  | 12   | RDR2-sensitive |
| CGGCCTGAGTGGGACGGTTGGCTC   | 0  | 12   | RDR2-sensitive |
| CGGCCTGGCACGGCACAGACCCAT   | 0  | 9    | RDR2-sensitive |
| CGGCCTGGGTGGGACGGTTGGCTC   | 4  | 49   | RDR2-sensitive |
| CGGCCTGTGTGGGACGGTTGGCTC   | 0  | 10   | RDR2-sensitive |
| CGGCCTGTTGACCGTGTCTGGACAA  | 0  | 17   | RDR2-sensitive |
| CGGCCTTGATCCCTATCTCGTCGT   | 0  | 16   | RDR2-sensitive |
| CGGCCTTGATAGAAAGCCGTCTGGAT | 0  | 12   | RDR2-sensitive |
| CGGCCTTGATAGGAAGCCGTCTGGAG | 0  | 9    | RDR2-sensitive |
| CGGCGAACAGGACCCATGGAAGGC   | 0  | 20   | RDR2-sensitive |
| CGGCGAACCGTGCAGTAGATTCAC   | 1  | 31   | RDR2-sensitive |
| CGGCGAACTGAACATCGGCAACAT   | 0  | 14   | RDR2-sensitive |
| CGGCGAACTGTACATCGACAACGG   | 0  | 35   | RDR2-sensitive |
| CGGCGAACTGTACATCGGCAACAA   | 5  | 161  | RDR2-sensitive |
| CGGCGAACTGTACATCGGCAACAG   | 66 | 1856 | RDR2-sensitive |
| CGGCGAACTGTACATCGGCAACAT   | 1  | 34   | RDR2-sensitive |
| CGGCGAACTGTACATCGGCAACCG   | 0  | 20   | RDR2-sensitive |
| CGGCGAACTGTACATCGGCAACGG   | 0  | 20   | RDR2-sensitive |
| CGGCGAACTGTACATCGGCAATAG   | 0  | 11   | RDR2-sensitive |
| CGGCGAACTGTACATCGGCACCAG   | 0  | 9    | RDR2-sensitive |
| CGGCGAACTGTACATCGGCCACAG   | 0  | 11   | RDR2-sensitive |
| CGGCGAACTGTATATCGGCAACAG   | 0  | 27   | RDR2-sensitive |
| CGGCGAAGGTCGAGGACGGAAGAC   | 0  | 10   | RDR2-sensitive |
| CGGCGAATTCTGGGTCAGGCGGCT   | 0  | 11   | RDR2-sensitive |
| CGGCGAATTCTGGGTGCGGCGGCT   | 0  | 10   | RDR2-sensitive |
| CGGCGAACTCGGCAAAGACTGGT    | 2  | 18   | RDR2-sensitive |
| CGGCGACGTACGGCTATAATTCAC   | 1  | 33   | RDR2-sensitive |
| CGGCGACGTAGACCAAGAGGGCTT   | 10 | 33   | RDR2-sensitive |
| CGGCGACGTAGATCAAGAGGGCTT   | 7  | 23   | RDR2-sensitive |
| CGGCGACTCAGACCTGGAGAGCAT   | 0  | 21   | RDR2-sensitive |
| CGGCGACTCTCGGGTTGTTCTGGG   | 1  | 25   | RDR2-sensitive |
| CGGCGACTGCACGGCACTGCTCGA   | 1  | 43   | RDR2-sensitive |
| CGGCGACTGCAGCGCGACGATGGT   | 0  | 9    | RDR2-sensitive |
| CGGCGAGAACTGCTGCCTGGGCGG   | 80 | 2    | RDR2-resistant |
| CGGCGAGGACGACGACGTCGGCGT   | 0  | 9    | RDR2-sensitive |
| CGGCGAGTTGTAGAGCACGATGGC   | 0  | 12   | RDR2-sensitive |
| CGGCGATGCTCTCTGCGTAGACGC   | 0  | 10   | RDR2-sensitive |
| CGGCGATGTTGGCGGCGTCTCTCGT  | 64 | 17   | RDR2-resistant |
| CGGCGCAGGAACGTTTCGACGACAT  | 0  | 11   | RDR2-sensitive |
| CGGCGCGAGACGGAACACAAAGGG   | 0  | 11   | RDR2-sensitive |
| CGGCGCGAGACGGAACACAAGGGG   | 0  | 10   | RDR2-sensitive |
| CGGCGCGAGACGGAGCACGAAGGG   | 0  | 9    | RDR2-sensitive |
| CGGCGCGAGAGGAGGATGGGTGAT   | 22 | 0    | RDR2-resistant |
| CGGCGCGGCTCGTAGCTCGGCGC    | 0  | 10   | RDR2-sensitive |
| CGGCGCTCGGACGGAAGGCGCGTG   | 3  | 45   | RDR2-sensitive |
| CGGCGCTCTGCTGGTGTGAGATGG   | 0  | 10   | RDR2-sensitive |
| CGGCGCTGTCTGCACACACGGCAC   | 1  | 13   | RDR2-sensitive |

|                           |     |    |                |
|---------------------------|-----|----|----------------|
| CGGCGGCAACTGGCTTATTTTCGG  | 2   | 21 | RDR2-sensitive |
| CGGCGGCAGGCTTGAGGCAGGACC  | 0   | 26 | RDR2-sensitive |
| CGGCGGCAGGGACAGGCTGATGCT  | 0   | 17 | RDR2-sensitive |
| CGGCGGCGCGAGAGGAGGATGGGT  | 31  | 0  | RDR2-resistant |
| CGGCGGCGTTCTGGAGACGAGCAA  | 0   | 9  | RDR2-sensitive |
| CGGCGTAATCTGTACAGTCGTCGT  | 0   | 9  | RDR2-sensitive |
| CGGCGTACACTGTTAATGGAGTCT  | 0   | 9  | RDR2-sensitive |
| CGGCGTACGGAAGGCTGACGACGT  | 0   | 10 | RDR2-sensitive |
| CGGCGTACGGCGGAACACGGGCGT  | 0   | 26 | RDR2-sensitive |
| CGGCGTAGAGTCCAAGAGAGGCGA  | 0   | 9  | RDR2-sensitive |
| CGGCGTCAGGCGTAGTTAATGCGG  | 0   | 13 | RDR2-sensitive |
| CGGCGTCATAGACTGTAACGGCGA  | 0   | 14 | RDR2-sensitive |
| CGGCGTCTGCGCACGGGAACGGTA  | 23  | 0  | RDR2-resistant |
| CGGCGTCTGTACACGGGAACGGTA  | 124 | 0  | RDR2-resistant |
| CGGCGTCTGTACACGGGAACGGTT  | 40  | 0  | RDR2-resistant |
| CGGCGTGACTCGCGAGCGAGGATG  | 0   | 9  | RDR2-sensitive |
| CGGCGTGACTCTAGCAGGAGCCAT  | 0   | 12 | RDR2-sensitive |
| CGGCGTGAGTTTGAGGTCGTCGTT  | 0   | 10 | RDR2-sensitive |
| CGGCGTGCCTGGACCATGACTGCG  | 0   | 9  | RDR2-sensitive |
| CGGCGTGCCTGTTAGGAGCCGGC   | 0   | 11 | RDR2-sensitive |
| CGGCGTGCTGACACATTGGACGGA  | 0   | 9  | RDR2-sensitive |
| CGGCGTGGAGCTCCAAGCGAGAAG  | 0   | 11 | RDR2-sensitive |
| CGGCGTGGGAGGCAGAACCCTGCA  | 0   | 10 | RDR2-sensitive |
| CGGCGTGTCTCTGGCGGAAGAGCT  | 0   | 17 | RDR2-sensitive |
| CGGCGTGTGCCTGAACCGGGCCGG  | 1   | 12 | RDR2-sensitive |
| CGGCTAATGTAGATGGGAGGTGAT  | 0   | 24 | RDR2-sensitive |
| CGGCTAATTGTATCAGCCCGTCGG  | 0   | 10 | RDR2-sensitive |
| CGGCTACGTA CTGATTTGTTTCCT | 0   | 12 | RDR2-sensitive |
| CGGCTACTGTAGCCACGAGCCGG   | 0   | 54 | RDR2-sensitive |
| CGGCTACTGTAGCCACGGGCCGG   | 0   | 12 | RDR2-sensitive |
| CGGCTACTTACTCTGCATTGAGGT  | 0   | 10 | RDR2-sensitive |
| CGGCTAGACGATAGGCTGACGGCA  | 0   | 12 | RDR2-sensitive |
| CGGCTAGGGCTCCTGCCTGACGGC  | 0   | 12 | RDR2-sensitive |
| CGGCTATCTGTAGTCGCGTGGTAA  | 0   | 10 | RDR2-sensitive |
| CGGCTATTGAGAGTGACGGAACAT  | 0   | 29 | RDR2-sensitive |
| CGGCTCCGACTCTGCTAGACGGGC  | 0   | 10 | RDR2-sensitive |
| CGGCTCCGGCAGCGGCTCTAGTAT  | 0   | 9  | RDR2-sensitive |
| CGGCTCCTCTGAAAACGGCTCCGA  | 0   | 9  | RDR2-sensitive |
| CGGCTCGAACTCGTTCCGAGCGTC  | 0   | 10 | RDR2-sensitive |
| CGGCTCGACACAGAGAAGACTCGC  | 0   | 9  | RDR2-sensitive |
| CGGCTCGACGGCATGAATCATGGC  | 0   | 10 | RDR2-sensitive |
| CGGCTCGACTCGAAGGTGGCTCGC  | 0   | 33 | RDR2-sensitive |
| CGGCTCGACTTGGCTCGGAGCGGC  | 0   | 9  | RDR2-sensitive |
| CGGCTCGATCCGGACCAAGTCTGA  | 0   | 10 | RDR2-sensitive |
| CGGCTCGATTACTGACGGTAACAA  | 0   | 23 | RDR2-sensitive |
| CGGCTCGCCACGGCACTGGACAT   | 0   | 9  | RDR2-sensitive |
| CGGCTCGGATTAGTTAGCAGGCCA  | 0   | 10 | RDR2-sensitive |
| CGGCTCGGCTCAAAGGCGGCTCGC  | 0   | 35 | RDR2-sensitive |
| CGGCTCGGCTCGAAGGTGGCTCGC  | 0   | 14 | RDR2-sensitive |

|                           |     |     |                |
|---------------------------|-----|-----|----------------|
| CGGCTCGGCTCGGCTCGCTGCGGC  | 0   | 15  | RDR2-sensitive |
| CGGCTCGGCTCGGCTCGGAGCGGC  | 1   | 41  | RDR2-sensitive |
| CGGCTCGGCTCGGCTCGGCTCGGT  | 0   | 10  | RDR2-sensitive |
| CGGCTCGGCTCGGCTCGGTGCGGC  | 0   | 9   | RDR2-sensitive |
| CGGCTCGGCTCGGCTCGTTAGTGT  | 0   | 13  | RDR2-sensitive |
| CGGCTCGGCTCGGTGAGGCTCGGT  | 1   | 12  | RDR2-sensitive |
| CGGCTCGGCTTGAAGGCGGCTCGC  | 0   | 10  | RDR2-sensitive |
| CGGCTCGGGCTCGTTCGAAGCGTC  | 0   | 15  | RDR2-sensitive |
| CGGCTCGTGTTTGGTAGACTGCAT  | 0   | 38  | RDR2-sensitive |
| CGGCTCGTTAGGCAGAAGGATCGT  | 0   | 12  | RDR2-sensitive |
| CGGCTCGTTAGTAGCTCGGCTCGA  | 2   | 32  | RDR2-sensitive |
| CGGCTCTCGCAAAGACTGACGGC   | 1   | 77  | RDR2-sensitive |
| CGGCTCTCGGTAAAGACTGACGGC  | 0   | 9   | RDR2-sensitive |
| CGGCTCTGTCTCGGCGACTCGG    | 0   | 12  | RDR2-sensitive |
| CGGCTCTGAATCTGCAACGGTCCG  | 0   | 11  | RDR2-sensitive |
| CGGCTCTGTGACGTGTGAGCGGCT  | 0   | 12  | RDR2-sensitive |
| CGGCTGAAAGACGTACCCATGGCA  | 0   | 22  | RDR2-sensitive |
| CGGCTGAATGGACCGAGGAGTCGT  | 0   | 19  | RDR2-sensitive |
| CGGCTGACTCTATCAGTCCGTCGG  | 0   | 10  | RDR2-sensitive |
| CGGCTGAGACTGTATGCGTCGAAT  | 0   | 19  | RDR2-sensitive |
| CGGCTGAGATCGCAGAACGGCAAA  | 0   | 10  | RDR2-sensitive |
| CGGCTGAGATCGCAGAACGGCAGA  | 0   | 11  | RDR2-sensitive |
| CGGCTGAGCAACCCTACGAGGCAA  | 0   | 13  | RDR2-sensitive |
| CGGCTGAGCGGACGACATCACAAC  | 0   | 11  | RDR2-sensitive |
| CGGCTGAGCGTAGTCTGCATGCAC  | 0   | 9   | RDR2-sensitive |
| CGGCTGCAAGAAGCTCGACAGACGC | 0   | 10  | RDR2-sensitive |
| CGGCTGCAGGAAGCTCGGCAGACGT | 0   | 19  | RDR2-sensitive |
| CGGCTGCATGAGCCAGGTGACGG   | 0   | 12  | RDR2-sensitive |
| CGGCTGCATGCAAGGACGGAGCGA  | 0   | 11  | RDR2-sensitive |
| CGGCTGCCACTCTGGGCCAGCGAA  | 4   | 17  | RDR2-sensitive |
| CGGCTGCCTAGACGACGGACGGAC  | 0   | 15  | RDR2-sensitive |
| CGGCTGCCTTTGGATGCTGATGGA  | 0   | 15  | RDR2-sensitive |
| CGGCTGCGGATTCACGGAAGACGT  | 1   | 20  | RDR2-sensitive |
| CGGCTGCGGCTGCGGCTTCTACAG  | 0   | 24  | RDR2-sensitive |
| CGGCTGCTCTGCATACGTTTCAGAC | 0   | 30  | RDR2-sensitive |
| CGGCTGCTGTAGCGGGCGACGCAA  | 0   | 16  | RDR2-sensitive |
| CGGCTGCTGTGGACAGAAGCTGGT  | 0   | 17  | RDR2-sensitive |
| CGGCTGCTGTGGAGAGAAGCTGGT  | 0   | 14  | RDR2-sensitive |
| CGGCTGGAATCACCATCGGGGCTA  | 36  | 2   | RDR2-resistant |
| CGGCTGGACAGGGAAGAAGAGCAC  | 0   | 106 | RDR2-sensitive |
| CGGCTGGACGACTGCATCTGTGCT  | 0   | 9   | RDR2-sensitive |
| CGGCTGGAGAGAGAGTGCGGGCAG  | 0   | 17  | RDR2-sensitive |
| CGGCTGGAGGGCGCTACGACCGCT  | 0   | 12  | RDR2-sensitive |
| CGGCTGGCACTCGGCAAAGAGGCT  | 0   | 25  | RDR2-sensitive |
| CGGCTGGCAGAACACACGGCTGGT  | 0   | 13  | RDR2-sensitive |
| CGGCTGGGAGGAGGGCCGAGGGCG  | 136 | 3   | RDR2-resistant |
| CGGCTGGGCGCTCGGCTTAGGCAT  | 41  | 7   | RDR2-resistant |
| CGGCTGGGCTGTAGTGCGGCGCAC  | 0   | 11  | RDR2-sensitive |
| CGGCTGTATAGGGGCATGTAGGCC  | 22  | 1   | RDR2-resistant |



|                          |    |     |                |
|--------------------------|----|-----|----------------|
| CGGCTGTATGAGTCAGGTCGGCGC | 0  | 110 | RDR2-sensitive |
| CGGCTGTCTACGATGCCGTCGGAC | 0  | 12  | RDR2-sensitive |
| CGGCTGTCTAGAAGACCGTCGGAC | 0  | 10  | RDR2-sensitive |
| CGGCTTAAAACCGTCGGAGATAAG | 0  | 9   | RDR2-sensitive |
| CGGCTTAAGACGGGTCCCGTCGGA | 0  | 10  | RDR2-sensitive |
| CGGCTTAAGGTCGGATATGATCGT | 0  | 13  | RDR2-sensitive |
| CGGCTTATTAGTAGCTCGGCTCGA | 1  | 18  | RDR2-sensitive |
| CGGCTTATTTGTCAGCCGTCGGAC | 0  | 9   | RDR2-sensitive |
| CGGCTTCGTCGACGGCGCTCGCCC | 0  | 10  | RDR2-sensitive |
| CGGCTTGAAGACGAAGGCGTGCAT | 0  | 14  | RDR2-sensitive |
| CGGCTTGACTCGGACCGCTTGAT  | 0  | 17  | RDR2-sensitive |
| CGGCTTGCTGCCTCTGGATGGCGT | 1  | 13  | RDR2-sensitive |
| CGGCTTGCTGTCTCTGGATGGCGT | 0  | 13  | RDR2-sensitive |
| CGGCTTGACGGAACACCGGGCGG  | 0  | 9   | RDR2-sensitive |
| CGGCTTGCGTAGAGAAGACTCGG  | 0  | 13  | RDR2-sensitive |
| CGGCTTGTAGCCAGCCGAACACGC | 2  | 38  | RDR2-sensitive |
| CGGCTTTAGACGGTAGCTGACGAC | 1  | 12  | RDR2-sensitive |
| CGGGAAATAGGACAGAGACGAGTT | 0  | 10  | RDR2-sensitive |
| CGGGAACAGAAACGGGAGCGGGAT | 0  | 23  | RDR2-sensitive |
| CGGGAACAGGAACGGGAGCGGGAT | 0  | 9   | RDR2-sensitive |
| CGGGAACCTGAAGGCGCTCCTCAC | 5  | 48  | RDR2-sensitive |
| CGGGAACGAGAATGTTGGACGGAA | 0  | 42  | RDR2-sensitive |
| CGGGAACGGAAACGGGAGCGGGAT | 2  | 46  | RDR2-sensitive |
| CGGGAAGACGAACAGGACGTCCGA | 0  | 13  | RDR2-sensitive |
| CGGGAAGACGAACGGGACGTCCGA | 0  | 11  | RDR2-sensitive |
| CGGGAAGTGGGCGCATGCATGCAT | 17 | 0   | RDR2-resistant |
| CGGGAATAGAAACAGGAGCGAGAT | 0  | 9   | RDR2-sensitive |
| CGGGAATTCTGGAGCTGAGGGCGC | 1  | 18  | RDR2-sensitive |
| CGGGACAAGTATAAGCAAGGCCT  | 0  | 10  | RDR2-sensitive |
| CGGGACACGTGGCCGAGCCAACGG | 0  | 11  | RDR2-sensitive |
| CGGGACACTGACAGATGGACCTAG | 0  | 16  | RDR2-sensitive |
| CGGGACAGACTGAGCTGAGGCGAC | 0  | 10  | RDR2-sensitive |
| CGGGACAGCCAGGACAGGGACGTC | 0  | 26  | RDR2-sensitive |
| CGGGACAGTCAGGACAGGGACGTC | 1  | 29  | RDR2-sensitive |
| CGGGACAGTTAGGACAGAGACGTC | 0  | 10  | RDR2-sensitive |
| CGGGACCAACTCCACTACTGGCAT | 0  | 10  | RDR2-sensitive |
| CGGGACCGAGGACGGGACAGGCGC | 3  | 28  | RDR2-sensitive |
| CGGGACCGCGTGTAGACGTGTATG | 1  | 19  | RDR2-sensitive |
| CGGGACCGGTTCTTACGTTCTCC  | 36 | 4   | RDR2-resistant |
| CGGGACGAACACGAAGGCCGCGGG | 8  | 54  | RDR2-sensitive |
| CGGGACGAAGGGAAGTAAAAGGCG | 0  | 15  | RDR2-sensitive |
| CGGGACGACTGTGAAGACGACGAT | 0  | 28  | RDR2-sensitive |
| CGGGACGAGCCAGATGAGACGCCG | 0  | 13  | RDR2-sensitive |
| CGGGACGCAAGCTGTATGAGCGGA | 0  | 9   | RDR2-sensitive |
| CGGGACGCCTACAGAGCATGACGA | 0  | 15  | RDR2-sensitive |
| CGGGACGGAGATGGTGTGGGGGAC | 29 | 0   | RDR2-resistant |
| CGGGACGGATACAGCTAGATACAG | 0  | 11  | RDR2-sensitive |
| CGGGACGGCGAAGCGGACGCTCAG | 1  | 13  | RDR2-sensitive |
| CGGGACGGGGATGGTGTGGGGGAC | 42 | 9   | RDR2-resistant |

|                            |    |     |                |
|----------------------------|----|-----|----------------|
| CGGGACGTGGATGGTGTGGGGGAC   | 75 | 0   | RDR2-resistant |
| CGGGACGTGGATGGTGTGGGGGCC   | 14 | 0   | RDR2-resistant |
| CGGGACGTTCTAGCTCGACGCCAT   | 0  | 16  | RDR2-sensitive |
| CGGGACTAACGACGGCAGAACGGC   | 0  | 18  | RDR2-sensitive |
| CGGGACTCGACGGCAGCACAACAC   | 0  | 11  | RDR2-sensitive |
| CGGGACTCGACGGCAGCGCAACAC   | 0  | 19  | RDR2-sensitive |
| CGGGACTGATATCGGTAGGATACT   | 0  | 12  | RDR2-sensitive |
| CGGGACTGGGCGTGCATACTGCAT   | 0  | 11  | RDR2-sensitive |
| CGGGACTGTTGGAGCACTGGCGGC   | 0  | 16  | RDR2-sensitive |
| CGGGAGACGCAGTCACGACTCGAC   | 0  | 9   | RDR2-sensitive |
| CGGGAGACTGGTGAGCAACGGCAA   | 2  | 122 | RDR2-sensitive |
| CGGGAGAGAGAACCGGTCGGCGTT   | 0  | 9   | RDR2-sensitive |
| CGGGAGATGAGCAAGAGCTTCGGA   | 0  | 19  | RDR2-sensitive |
| CGGGAGATTCATGCGGACCGCGGC   | 18 | 1   | RDR2-resistant |
| CGGGAGCGGAACAACACTACGGTCGG | 0  | 34  | RDR2-sensitive |
| CGGGAGGCTTGAACCGAAGCAGAG   | 0  | 11  | RDR2-sensitive |
| CGGGAGTAGAAAGACGGATGACAT   | 0  | 9   | RDR2-sensitive |
| CGGGAGTAGGGGGCTAAATTTTTT   | 57 | 0   | RDR2-resistant |
| CGGGAGTGTACAGCGCGATGGCAG   | 0  | 9   | RDR2-sensitive |
| CGGGAGTTACTTAATCCCCGTCGG   | 0  | 29  | RDR2-sensitive |
| CGGGAGTTAGTTAATCCCCGTCGG   | 0  | 11  | RDR2-sensitive |
| CGGGATCTCGGCGTAGTAGCGGAT   | 0  | 38  | RDR2-sensitive |
| CGGGATCTGATTGACGGCTTTCCA   | 0  | 9   | RDR2-sensitive |
| CGGGATCTGTAACCTTTTCACGGT   | 0  | 9   | RDR2-sensitive |
| CGGGATCTGTTGAAGATGGCCTAA   | 0  | 10  | RDR2-sensitive |
| CGGGATGAACACGAGAGGACACGA   | 0  | 10  | RDR2-sensitive |
| CGGGATGGCAGAACCGTGCACCGT   | 0  | 9   | RDR2-sensitive |
| CGGGATTGACCTCGAGCAAGCCGG   | 0  | 9   | RDR2-sensitive |
| CGGGATTGACTGGCCGCGAGACAA   | 0  | 12  | RDR2-sensitive |
| CGGGATTGCACTCGGGCGAGTCGT   | 1  | 13  | RDR2-sensitive |
| CGGGATTTACTCTAAAACCGACGG   | 1  | 18  | RDR2-sensitive |
| CGGGATTTGTAGTGGGCAGTAGTG   | 0  | 9   | RDR2-sensitive |
| CGGGCAAAGGATGGCATGGCTGTA   | 0  | 10  | RDR2-sensitive |
| CGGGCAACATCAGGAACGGGGCAT   | 0  | 9   | RDR2-sensitive |
| CGGGCAACCCACCAAGGCGGACAG   | 0  | 25  | RDR2-sensitive |
| CGGGCAATCTCTGCAGCAGATCGA   | 1  | 13  | RDR2-sensitive |
| CGGGCACACAGAGCGGTAGGGGTG   | 80 | 0   | RDR2-resistant |
| CGGGCACACGTGACGTACGCTGAT   | 0  | 16  | RDR2-sensitive |
| CGGGCACCTGGACCTGACGTCAT    | 1  | 17  | RDR2-sensitive |
| CGGGCACCTAAGCAGGAACACGAC   | 1  | 14  | RDR2-sensitive |
| CGGGCACGAATAAGTGGGTCCGAC   | 1  | 17  | RDR2-sensitive |
| CGGGCACGACTGCAGCGACTGAAG   | 0  | 9   | RDR2-sensitive |
| CGGGCACGCATGGAACCGGACCGT   | 0  | 10  | RDR2-sensitive |
| CGGGCACGGCTATAGTCAATGCAC   | 0  | 25  | RDR2-sensitive |
| CGGGCACGGGTACAACATTTTCAT   | 0  | 19  | RDR2-sensitive |
| CGGGCACGTAGGGCGGCAAGACAT   | 0  | 11  | RDR2-sensitive |
| CGGGCACTCCTGGCAGAACCGTGC   | 0  | 11  | RDR2-sensitive |
| CGGGCACTCGACAAAGAAGGCTTC   | 0  | 10  | RDR2-sensitive |
| CGGGCACTCGACAAAGAAGGCTTT   | 0  | 37  | RDR2-sensitive |

|                           |      |     |                |
|---------------------------|------|-----|----------------|
| CGGGCACTCGGCAAACACTACTTT  | 0    | 21  | RDR2-sensitive |
| CGGGCACTCGGCAAAGAACGGTTT  | 1    | 18  | RDR2-sensitive |
| CGGGCACTCGGCAAAGAAGACTTT  | 1    | 25  | RDR2-sensitive |
| CGGGCACTCGGCAAAGAAGGATTT  | 0    | 11  | RDR2-sensitive |
| CGGGCACTCGGCAAAGAAGGCTTT  | 6    | 286 | RDR2-sensitive |
| CGGGCACTCGGCAAAGACAGCTTT  | 0    | 21  | RDR2-sensitive |
| CGGGCAGAACACGGTGCCTTGTG   | 0    | 19  | RDR2-sensitive |
| CGGGCAGAACTCAACCGCAGGCGT  | 1    | 19  | RDR2-sensitive |
| CGGGCAGAGAATCGCGTGATTGGT  | 0    | 12  | RDR2-sensitive |
| CGGGCAGAGTCTGACGTAAAGCAT  | 0    | 10  | RDR2-sensitive |
| CGGGCAGCCAGAACGTGACGACAA  | 0    | 9   | RDR2-sensitive |
| CGGGCAGCGTTGGAACGGGGCAT   | 0    | 13  | RDR2-sensitive |
| CGGGCAGGAACAAACGATGCGGTT  | 0    | 9   | RDR2-sensitive |
| CGGGCAGGAGCTCACGACCGGTGT  | 1    | 16  | RDR2-sensitive |
| CGGGCAGTCTCGGACGCAGACGTG  | 0    | 9   | RDR2-sensitive |
| CGGGCATCAACTCTGCAGGTAGAG  | 1    | 19  | RDR2-sensitive |
| CGGGCATCGTGACGCATCATCTGG  | 1    | 54  | RDR2-sensitive |
| CGGGCATGTTGGCACCGGCTGGCG  | 29   | 3   | RDR2-resistant |
| CGGGCCACAACCTGGCACGTCAT   | 0    | 22  | RDR2-sensitive |
| CGGGCCAGAATCGTGTCGGGTCAC  | 0    | 9   | RDR2-sensitive |
| CGGGCCAGGGACGGGGTAGAGGGC  | 1002 | 1   | RDR2-resistant |
| CGGGCCAGGTTGGAACGGGCACGG  | 0    | 11  | RDR2-sensitive |
| CGGGCCCAGAAGACAGAGCTCCAA  | 1    | 16  | RDR2-sensitive |
| CGGGCCCGTAGACGATCGTGCCGG  | 0    | 10  | RDR2-sensitive |
| CGGGCCGAATGCATGACGGGCTAT  | 0    | 47  | RDR2-sensitive |
| CGGGCCGACAGCATGGACGAGCAG  | 0    | 11  | RDR2-sensitive |
| CGGGCCGAGTATGGACAGATACGG  | 0    | 18  | RDR2-sensitive |
| CGGGCCGATAGACAACGGACGGTT  | 0    | 9   | RDR2-sensitive |
| CGGGCCGCAGAGAACAAGACCGGT  | 25   | 79  | RDR2-sensitive |
| CGGGCCGCAGGGAACAAGACCGGT  | 3    | 28  | RDR2-sensitive |
| CGGGCCGGGACAGCACGTCGTGAC  | 0    | 9   | RDR2-sensitive |
| CGGGCCGGGTATGAGTAGATACGG  | 0    | 17  | RDR2-sensitive |
| CGGGCCGGGTATGGACAGATACGG  | 3    | 27  | RDR2-sensitive |
| CGGGCCTACATAGAACTGGGTCGT  | 0    | 21  | RDR2-sensitive |
| CGGGCCTAGCTCCAGTCGTGTCAT  | 0    | 9   | RDR2-sensitive |
| CGGGCCTCCAATTCTGGATGTCGG  | 0    | 9   | RDR2-sensitive |
| CGGGCCTGTACGTGAAGCATGAGC  | 0    | 9   | RDR2-sensitive |
| CGGGCCTTTGGCAGAACGCGTCAG  | 0    | 20  | RDR2-sensitive |
| CGGGCGAAAGGACAATGTAGGCAC  | 0    | 15  | RDR2-sensitive |
| CGGGCGAAGCAGGCTTCCTCTGGA  | 0    | 16  | RDR2-sensitive |
| CGGGCGACGCACTGGCACAGACGA  | 0    | 22  | RDR2-sensitive |
| CGGGCGACGGTAGAAGAGGAAGAC  | 0    | 13  | RDR2-sensitive |
| CGGGCGACGTAGGGTAGGACGGGT  | 0    | 10  | RDR2-sensitive |
| CGGGCGGAAAACCTCCGAGGAGCGA | 1    | 15  | RDR2-sensitive |
| CGGGCGGACGGTTGTGGCGAGGGC  | 0    | 17  | RDR2-sensitive |
| CGGGCGGATAAGTGACGGATACAG  | 0    | 14  | RDR2-sensitive |
| CGGGCGGATACGGACGGATAGTAG  | 2    | 37  | RDR2-sensitive |
| CGGGCGGATACGGACGGATATTAG  | 0    | 38  | RDR2-sensitive |
| CGGGCGGATGATGATCAAGGAGGC  | 49   | 10  | RDR2-resistant |

|                           |     |    |                |
|---------------------------|-----|----|----------------|
| CGGGCGGATTTCCGGCATAAAACGT | 1   | 18 | RDR2-sensitive |
| CGGGCGGCCCGAATGTACACCTAT  | 2   | 14 | RDR2-sensitive |
| CGGGCGGCGTGAGTACAATAGTGA  | 0   | 11 | RDR2-sensitive |
| CGGGCGGCTGTTTGGCAAGTCGGT  | 0   | 9  | RDR2-sensitive |
| CGGGCGGGTAGTACACGGATATAT  | 0   | 11 | RDR2-sensitive |
| CGGGCGTAGAAGGAGGCATCTCGC  | 0   | 16 | RDR2-sensitive |
| CGGGCGTGCAGACTGCAGACACGT  | 0   | 24 | RDR2-sensitive |
| CGGGCGTGCAGACTGCATACACGT  | 0   | 62 | RDR2-sensitive |
| CGGGCGTTCCGGTAGAGCGGGGGCA | 0   | 17 | RDR2-sensitive |
| CGGGCGTTTCTTAGAACAGTCGGT  | 1   | 50 | RDR2-sensitive |
| CGGGCTAAACGGGCCGGTAAGCAC  | 1   | 14 | RDR2-sensitive |
| CGGGCTAAACGGGTACGGGTTCCGG | 0   | 14 | RDR2-sensitive |
| CGGGCTAAACTGCTGGTCCAAGCA  | 0   | 9  | RDR2-sensitive |
| CGGGCTAAACTTTAGCAGGAGCAA  | 1   | 32 | RDR2-sensitive |
| CGGGCTAACGGGCTGACTCGGCAC  | 0   | 18 | RDR2-sensitive |
| CGGGCTAACGGGCTGTTCCGGCAC  | 0   | 12 | RDR2-sensitive |
| CGGGCTACAGGCAGAACTGTGCAC  | 0   | 14 | RDR2-sensitive |
| CGGGCTAGCACAGCACGAAGACAT  | 0   | 24 | RDR2-sensitive |
| CGGGCTAGCACGACATGACACGGA  | 0   | 9  | RDR2-sensitive |
| CGGGCTAGCACGACCTGAAGGCCG  | 0   | 9  | RDR2-sensitive |
| CGGGCTAGCACGACTTAAATGCCG  | 0   | 10 | RDR2-sensitive |
| CGGGCTAGCACGGCCTGAAAGCCG  | 1   | 12 | RDR2-sensitive |
| CGGGCTAGCACGGCCTGAAGACCG  | 0   | 21 | RDR2-sensitive |
| CGGGCTAGCACGGCCTGAAGTCGG  | 0   | 30 | RDR2-sensitive |
| CGGGCTAGTACGGCACGACCTGTC  | 2   | 43 | RDR2-sensitive |
| CGGGCTAGTTTGGCAGCAACGTGG  | 0   | 15 | RDR2-sensitive |
| CGGGCTATACCTGACGGGCCGAAT  | 0   | 13 | RDR2-sensitive |
| CGGGCTATATGGGCTAAACGGGCT  | 0   | 16 | RDR2-sensitive |
| CGGGCTATGCGGACCGGTAAGCAC  | 0   | 14 | RDR2-sensitive |
| CGGGCTATGCGGGACGGTAAGCAC  | 0   | 10 | RDR2-sensitive |
| CGGGCTATTTTCGTCGGCCGACCC  | 0   | 23 | RDR2-sensitive |
| CGGGCTATTTTCGTCGGCCGGCCC  | 2   | 25 | RDR2-sensitive |
| CGGGCTCAGCCTCGGAAGACGACG  | 14  | 0  | RDR2-resistant |
| CGGGCTCAGTCCAGGTCGGCCTAG  | 0   | 15 | RDR2-sensitive |
| CGGGCTCGACAACACGCGAAGCGA  | 2   | 31 | RDR2-sensitive |
| CGGGCTCGGACAAGAACTAGGCA   | 0   | 54 | RDR2-sensitive |
| CGGGCTCGGACAGAAACTAGGCA   | 0   | 11 | RDR2-sensitive |
| CGGGCTCGGACAGGAACTAGGCA   | 1   | 32 | RDR2-sensitive |
| CGGGCTCGGACAGGAAATTAGGCA  | 4   | 41 | RDR2-sensitive |
| CGGGCTCTGTAGGGTGTGCCGGT   | 0   | 10 | RDR2-sensitive |
| CGGGCTGACGCTTGCCGACGGCGC  | 0   | 10 | RDR2-sensitive |
| CGGGCTGACTCGGTAAGCACGGAA  | 0   | 11 | RDR2-sensitive |
| CGGGCTGAGCCAATGGCACGGGCC  | 26  | 2  | RDR2-resistant |
| CGGGCTGAGGCCGTGGTAGATCGG  | 0   | 14 | RDR2-sensitive |
| CGGGCTGATTGGTTGGACGGACGC  | 0   | 10 | RDR2-sensitive |
| CGGGCTGCATGACGTAGGTGACGA  | 4   | 33 | RDR2-sensitive |
| CGGGCTGCGGGATACCAAAGAGGC  | 0   | 10 | RDR2-sensitive |
| CGGGCTGCGTCCTGACGGAGGTAT  | 0   | 9  | RDR2-sensitive |
| CGGGCTGGACAGCGGCTGGGAGGA  | 888 | 43 | RDR2-resistant |

|                            |    |     |                |
|----------------------------|----|-----|----------------|
| CGGGCTGGACAGCGGCTGGGAGGC   | 23 | 2   | RDR2-resistant |
| CGGGCTGGACAGCGGCTGGGAGGG   | 63 | 4   | RDR2-resistant |
| CGGGCTGGACAGCGGCTGGGAGGT   | 16 | 0   | RDR2-resistant |
| CGGGCTGGACCGGGCCGAATGCAT   | 0  | 9   | RDR2-sensitive |
| CGGGCTGGCACGGGCACGAAACCA   | 0  | 11  | RDR2-sensitive |
| CGGGCTGGCTCGGCACGATCTAGA   | 0  | 10  | RDR2-sensitive |
| CGGGCTGGCTGACGCGGTCCAGAC   | 0  | 11  | RDR2-sensitive |
| CGGGCTGGGACCAGAGGACGACGA   | 0  | 19  | RDR2-sensitive |
| CGGGCTGGGACTAGAGAACGACGA   | 0  | 9   | RDR2-sensitive |
| CGGGCTGTAATGACTGGTTGTCGT   | 0  | 15  | RDR2-sensitive |
| CGGGCTGTAATTCGTGCGGACGG    | 1  | 13  | RDR2-sensitive |
| CGGGCTGTCCGCACGGAGCAGGCC   | 1  | 13  | RDR2-sensitive |
| CGGGCTGTCCGCGTGGAGCAGGCC   | 0  | 16  | RDR2-sensitive |
| CGGGCTGTTCTACCAGAGCGGCAA   | 1  | 24  | RDR2-sensitive |
| CGGGCTTAAAACGGGCGACCTCAA   | 0  | 15  | RDR2-sensitive |
| CGGGCTTAAACGGGCTTAGAGGTAA  | 0  | 31  | RDR2-sensitive |
| CGGGCTTACTGGACAGGCCGACGT   | 0  | 21  | RDR2-sensitive |
| CGGGCTTAGAGATAAACGGGTCGT   | 0  | 28  | RDR2-sensitive |
| CGGGCTTAGAGCTAAACGGGCCGT   | 3  | 41  | RDR2-sensitive |
| CGGGCTTAGAGGTAAACGGGCCGT   | 5  | 166 | RDR2-sensitive |
| CGGGCTTAGAGGTAAACGGGTCGT   | 3  | 68  | RDR2-sensitive |
| CGGGCTTAGAGTTAAACGGGTCGT   | 0  | 19  | RDR2-sensitive |
| CGGGCTTAGGCTGTGATCCAGGCA   | 0  | 10  | RDR2-sensitive |
| CGGGCTTCACTTGATCCGTGTCGG   | 0  | 14  | RDR2-sensitive |
| CGGGCTTCAGGAAAATGACCGGGA   | 0  | 9   | RDR2-sensitive |
| CGGGCTTGAATCGGCATGGACCAA   | 0  | 15  | RDR2-sensitive |
| CGGGCTTGACAGGAAACTAGGCAC   | 3  | 59  | RDR2-sensitive |
| CGGGCTTGCAGGACGGGTTCGGCGT  | 0  | 34  | RDR2-sensitive |
| CGGGCTTGCTCGTTCGTAGTCGGAT  | 0  | 28  | RDR2-sensitive |
| CGGGCTTGGACAGGAAACTAGGCA   | 5  | 112 | RDR2-sensitive |
| CGGGCTTGGACAGGGAAGACTAGGCA | 0  | 11  | RDR2-sensitive |
| CGGGCTTGGCCTCAGGTGAGTCGT   | 0  | 17  | RDR2-sensitive |
| CGGGCTTGGCGGAATCAGCGGGGA   | 25 | 2   | RDR2-resistant |
| CGGGCTTGTTCTGAGCGGCGAGCC   | 0  | 9   | RDR2-sensitive |
| CGGGCTTLAGAGGGTGTGTGCGGT   | 0  | 12  | RDR2-sensitive |
| CGGGGAACAAGACCGGCGTCCCAT   | 2  | 17  | RDR2-sensitive |
| CGGGGAACGGGGCATCAGAGCAGA   | 0  | 9   | RDR2-sensitive |
| CGGGGAATCCTCATGGAACGGCTT   | 0  | 9   | RDR2-sensitive |
| CGGGGAATTAGGACGAGACGCGGT   | 0  | 9   | RDR2-sensitive |
| CGGGGACACAGAGCAGAGCAACGC   | 0  | 30  | RDR2-sensitive |
| CGGGGACCTGCCGACTTGACGGAG   | 0  | 36  | RDR2-sensitive |
| CGGGGACGAGGAATAGGATACCAT   | 0  | 33  | RDR2-sensitive |
| CGGGGACGAGGACGAGACAGGCGC   | 19 | 46  | RDR2-sensitive |
| CGGGGACGGGGAATAGGATACCAT   | 0  | 37  | RDR2-sensitive |
| CGGGGAGCTATCTGGACCCGTCGG   | 0  | 12  | RDR2-sensitive |
| CGGGGAGGAGGAACAGAAGAAAA    | 23 | 0   | RDR2-resistant |
| CGGGGAGGGTCGCGCAGCCAGGTT   | 24 | 0   | RDR2-resistant |
| CGGGGATAACTTAACTCCCGTCGG   | 0  | 10  | RDR2-sensitive |
| CGGGGATAAGGTTATCCACGTCGG   | 0  | 9   | RDR2-sensitive |

|                           |     |    |                |
|---------------------------|-----|----|----------------|
| CGGGGATCGGGAGGTAGAGGATGG  | 0   | 15 | RDR2-sensitive |
| CGGGGATGGTCGTTGGCAGCCGGT  | 816 | 6  | RDR2-resistant |
| CGGGGATTAAGTAACTCCCGTCGG  | 0   | 15 | RDR2-sensitive |
| CGGGGATTCCTTAACTCTCGTCGG  | 0   | 17 | RDR2-sensitive |
| CGGGGCAGAGGCACCTGAACGCAT  | 0   | 11 | RDR2-sensitive |
| CGGGGCATCAACACGGGCATGAAG  | 52  | 1  | RDR2-resistant |
| CGGGGCATTGTAAGTGGCAGAGTG  | 78  | 8  | RDR2-resistant |
| CGGGGCCACGGCCGCGCCATGCGT  | 26  | 0  | RDR2-resistant |
| CGGGGCCTTGAGATAGATGACGT   | 0   | 11 | RDR2-sensitive |
| CGGGGCTGACCTGATCGAGATCGC  | 0   | 16 | RDR2-sensitive |
| CGGGGGCTCAAGCTGGATTATCGA  | 3   | 20 | RDR2-sensitive |
| CGGGGGCTGATAGTGGCAGACTAG  | 0   | 10 | RDR2-sensitive |
| CGGGGGGACGGTGCTCGCCTTCGT  | 18  | 0  | RDR2-resistant |
| CGGGGGTAAATCTGAGCAAGACGT  | 0   | 27 | RDR2-sensitive |
| CGGGGGTAGATCTGAGCAAGACGT  | 0   | 9  | RDR2-sensitive |
| CGGGGGTTGAAGGGGAAGATGCGG  | 24  | 1  | RDR2-resistant |
| CGGGGTGCGGTGCTGAACCGGCGC  | 0   | 12 | RDR2-sensitive |
| CGGGGTGGGTGAGCGGTTGACGTC  | 15  | 0  | RDR2-resistant |
| CGGGTAAGGAGGCGGAGGGTGGGA  | 15  | 0  | RDR2-resistant |
| CGGGTACGAACCACCTGACGGTGT  | 0   | 14 | RDR2-sensitive |
| CGGGTACGGTTCCGGATATCGGAT  | 0   | 9  | RDR2-sensitive |
| CGGGTACTCGACAAAGAAGGCTTT  | 0   | 16 | RDR2-sensitive |
| CGGGTAGAAACCAAGTTGGACCGG  | 0   | 68 | RDR2-sensitive |
| CGGGTAGAATGGCGTACACAAGAT  | 0   | 14 | RDR2-sensitive |
| CGGGTAGCTGTCTGGGCACGTCGG  | 0   | 15 | RDR2-sensitive |
| CGGGTAGGATACGGAATCACTAAT  | 0   | 9  | RDR2-sensitive |
| CGGGTAGGGATTGTGAACGGGTAT  | 0   | 9  | RDR2-sensitive |
| CGGGTAGTTAGAAACGGGACGGAT  | 0   | 9  | RDR2-sensitive |
| CGGGTAGTTCAGGACTGCAACGGC  | 0   | 19 | RDR2-sensitive |
| CGGGTATGAGGGGAGGTGAGTCGT  | 0   | 9  | RDR2-sensitive |
| CGGGTATGAGTAGATACGGCCGGC  | 0   | 10 | RDR2-sensitive |
| CGGGTATTTCTCGTCGGAGGGTAT  | 0   | 10 | RDR2-sensitive |
| CGGGTCAAAGTCGGGTCGTGGGTC  | 0   | 10 | RDR2-sensitive |
| CGGGTCAAATGTAGAAAACGGTAC  | 0   | 17 | RDR2-sensitive |
| CGGGTCACGGAGAACAAGACCGGC  | 21  | 46 | RDR2-sensitive |
| CGGGTCACGGGCTAAACGGGCGGC  | 2   | 33 | RDR2-sensitive |
| CGGGTCCGGAATAGTCGGGAACGG  | 2   | 20 | RDR2-sensitive |
| CGGGTCCGTAGAGCCTGAAGGCAT  | 0   | 11 | RDR2-sensitive |
| CGGGTCCTGTTTTATAGACGTCCG  | 0   | 10 | RDR2-sensitive |
| CGGGTCCTGTTTTATAGACGTCTG  | 0   | 13 | RDR2-sensitive |
| CGGGTCGTGCCTGGGCCGAAGGGT  | 0   | 12 | RDR2-sensitive |
| CGGGTCTAGCTGTGCTTGGGTCGG  | 0   | 12 | RDR2-sensitive |
| CGGGTCTGTGGAGAACGGGATG    | 0   | 9  | RDR2-sensitive |
| CGGGTGAACGACAGTTGAACGGTT  | 0   | 9  | RDR2-sensitive |
| CGGGTGAATGATGCATTTATTGAC  | 28  | 1  | RDR2-resistant |
| CGGGTGACCAGAAGACGAAGGAGA  | 40  | 4  | RDR2-resistant |
| CGGGTGCGCTTGCAAGTAGGGGGTT | 7   | 31 | RDR2-sensitive |
| CGGGTGCGCTTGTAGTAGGGGGTT  | 0   | 10 | RDR2-sensitive |
| CGGGTGCTGAGTAGGAGTCCGCAT  | 0   | 31 | RDR2-sensitive |

|                           |     |     |                |
|---------------------------|-----|-----|----------------|
| CGGGTGGACCATGGCATACTCTAT  | 0   | 18  | RDR2-sensitive |
| CGGGTGGACTGGTGTATGTCACGG  | 0   | 13  | RDR2-sensitive |
| CGGGTGGGTAGTACGCGGATATAT  | 0   | 9   | RDR2-sensitive |
| CGGGTGGTAGAACGCGGCAGTGTG  | 0   | 9   | RDR2-sensitive |
| CGGGTGTAGCTGTGCTCGGGCCGG  | 0   | 9   | RDR2-sensitive |
| CGGGTGTGTAGACGTGGGACGCGC  | 0   | 10  | RDR2-sensitive |
| CGGGTTACCCATATAAGGTCGCGG  | 0   | 11  | RDR2-sensitive |
| CGGGTTACTGTTATTGATCGGCTC  | 363 | 89  | RDR2-resistant |
| CGGGTTATGCTACCTCACGTCGGT  | 0   | 14  | RDR2-sensitive |
| CGGGTTCGGGCCAGCAAAGACCAA  | 0   | 35  | RDR2-sensitive |
| CGGGTTCGGGTTTCGGTTTTCGGTT | 0   | 9   | RDR2-sensitive |
| CGGGTTCGGGTTTCGGGTTACGGG  | 0   | 9   | RDR2-sensitive |
| CGGGTTGAGACTGTAGCATGGTGT  | 0   | 10  | RDR2-sensitive |
| CGGGTTGAGGCTCAGACACGGCAC  | 0   | 12  | RDR2-sensitive |
| CGGGTTGCTCGGAACCGAAAACGG  | 0   | 9   | RDR2-sensitive |
| CGGGTTGGACTGCACGACGGGCTC  | 1   | 21  | RDR2-sensitive |
| CGGGTTTGGGCATGTCAGTAGGCA  | 0   | 10  | RDR2-sensitive |
| CGGGTTTTCGGGTTCGGGTTTCGGT | 0   | 12  | RDR2-sensitive |
| CGGTAAACTTGGTCGGCCGGTAA   | 0   | 11  | RDR2-sensitive |
| CGGTAAGGACTGTCAGCGGCCGT   | 0   | 18  | RDR2-sensitive |
| CGGTAAGTCAGCTGCAGGAGGCCA  | 0   | 9   | RDR2-sensitive |
| CGGTAATGAGGCTCGGCTCGGCTC  | 1   | 22  | RDR2-sensitive |
| CGGTACACCCCTGTAGACCCGGC   | 0   | 23  | RDR2-sensitive |
| CGGTACCAACGGCGATACTCGAAA  | 0   | 11  | RDR2-sensitive |
| CGGTACCCTAAGAACCGTCGGAAA  | 0   | 23  | RDR2-sensitive |
| CGGTACCCTAGGAACCGTCGGAAC  | 0   | 20  | RDR2-sensitive |
| CGGTACGAACAAGCAGGCCGGGCT  | 0   | 14  | RDR2-sensitive |
| CGGTACGAACAAGCGGGCGGGCTT  | 0   | 9   | RDR2-sensitive |
| CGGTACGAACACGGCACGACACAT  | 0   | 9   | RDR2-sensitive |
| CGGTACGAATAAGCGGGCGGGCTT  | 0   | 12  | RDR2-sensitive |
| CGGTACGACCTGTGGAGGAGCGGT  | 0   | 33  | RDR2-sensitive |
| CGGTACGCGTCTGGGCTTGGACGG  | 0   | 10  | RDR2-sensitive |
| CGGTACGGTAGAATAAGTGGGCGG  | 1   | 44  | RDR2-sensitive |
| CGGTACTAAGCACGGTAGGACGGT  | 0   | 21  | RDR2-sensitive |
| CGGTACTCTCTGGTCAGGCGCGGA  | 0   | 9   | RDR2-sensitive |
| CGGTACTGGGAGAAGGAAAGGCAC  | 0   | 24  | RDR2-sensitive |
| CGGTAGAACTGACGTGGCACGTAC  | 1   | 24  | RDR2-sensitive |
| CGGTAGAATAAGCGGGCGGGCTTA  | 0   | 9   | RDR2-sensitive |
| CGGTAGAATAAGCGGGCGGGCTTG  | 6   | 175 | RDR2-sensitive |
| CGGTAGAATATTTGGTTTTATAGG  | 30  | 0   | RDR2-resistant |
| CGGTAGAGCTCTTCGGTGCGGGCA  | 0   | 16  | RDR2-sensitive |
| CGGTAGGACCAACAATGTCAGCAT  | 0   | 20  | RDR2-sensitive |
| CGGTAGGAGACGCAGTCAGGACTC  | 0   | 22  | RDR2-sensitive |
| CGGTAGGGATGGATATGGATGGCA  | 44  | 2   | RDR2-resistant |
| CGGTAGTGCCCTCTCTGCGACGGT  | 0   | 13  | RDR2-sensitive |
| CGGTAGTGGGCTCATGACTCGGCA  | 0   | 9   | RDR2-sensitive |
| CGGTATGCTTTTTGATCAACGGAC  | 66  | 18  | RDR2-resistant |
| CGGTATGGGAACAGGGGCGGAGGC  | 14  | 0   | RDR2-resistant |
| CGGTCAACTGTATCCGTGACTGCA  | 0   | 16  | RDR2-sensitive |

|                           |    |     |                |
|---------------------------|----|-----|----------------|
| CGGTCAAGCAGTAGGTGGTGGCTA  | 14 | 0   | RDR2-resistant |
| CGGTCAATGTAGCCAGGCAGACGC  | 0  | 14  | RDR2-sensitive |
| CGGTCAGACAAGGCAGAACGCGGT  | 1  | 22  | RDR2-sensitive |
| CGGTCAGACGGGAGACGTTGGAGC  | 0  | 9   | RDR2-sensitive |
| CGGTCAGAGGTAGAACGGTCAAAA  | 0  | 15  | RDR2-sensitive |
| CGGTCAGGTAGACCTCCACGGTGT  | 2  | 28  | RDR2-sensitive |
| CGGTCAGTAGAGCGGCCAAGTGAC  | 3  | 26  | RDR2-sensitive |
| CGGTCAGTAGCGACTTACGTGGCA  | 2  | 26  | RDR2-sensitive |
| CGGTCAGTCGGCTGGGCGAGCGTG  | 0  | 12  | RDR2-sensitive |
| CGGTCAGTGGAGCAGCGGAGTGAC  | 2  | 17  | RDR2-sensitive |
| CGGTCAGTGGAGCGGCCAAGTGAC  | 99 | 328 | RDR2-sensitive |
| CGGTCAGTGGAGCGGTGAAGTGAC  | 2  | 16  | RDR2-sensitive |
| CGGTCCACGGCCTGAACCGGACGG  | 0  | 9   | RDR2-sensitive |
| CGGTCCACGGGCTCCAAGCGAGAG  | 0  | 11  | RDR2-sensitive |
| CGGTCCAGTATGAATATCCGGCCA  | 0  | 10  | RDR2-sensitive |
| CGGTCCCTGTAAATTTAGTTCCGG  | 0  | 14  | RDR2-sensitive |
| CGGTCCGAACCCGGCACGGTAGAA  | 1  | 100 | RDR2-sensitive |
| CGGTCCGAACCTGGCACGGTAGAA  | 0  | 10  | RDR2-sensitive |
| CGGTCCGACTAGAGGCGTGTCCAG  | 0  | 15  | RDR2-sensitive |
| CGGTCCGAGCCCGGCACGGTAGAA  | 0  | 26  | RDR2-sensitive |
| CGGTCCGCCCTGTAGATCAACGG   | 4  | 247 | RDR2-sensitive |
| CGGTCCGCGCCTGTAGATCAACGG  | 0  | 88  | RDR2-sensitive |
| CGGTCCGCGCTCTGAGCCAGTCGG  | 0  | 14  | RDR2-sensitive |
| CGGTCCGCGCTCTGGAACCTGACGG | 0  | 14  | RDR2-sensitive |
| CGGTCCGGACATAACGTAGGGGCT  | 0  | 42  | RDR2-sensitive |
| CGGTCCGGACATGCGCAGATCGGC  | 0  | 9   | RDR2-sensitive |
| CGGTCCGGACATGTGCAGATCGGC  | 0  | 9   | RDR2-sensitive |
| CGGTCCGGGCTAGCTGGAGACTGG  | 0  | 15  | RDR2-sensitive |
| CGGTCCGTGACACACGGTTAGAAA  | 1  | 12  | RDR2-sensitive |
| CGGTCCGTGACCTGAGCACAGGAG  | 0  | 13  | RDR2-sensitive |
| CGGTCCGTGATGACGCATGATCGT  | 0  | 12  | RDR2-sensitive |
| CGGTCCGTGATGAGGCGGTCGGAG  | 1  | 16  | RDR2-sensitive |
| CGGTCCGACCTGACAAGGGAGGTC  | 0  | 9   | RDR2-sensitive |
| CGGTCCGACCAACTCTGCGAGACGG | 0  | 10  | RDR2-sensitive |
| CGGTCCGAGACTCGAGAGTGGGCAG | 0  | 11  | RDR2-sensitive |
| CGGTCCGAGATTGACGGCAGAACGG | 0  | 11  | RDR2-sensitive |
| CGGTCCGAGCAGCTCGAGAATGCAT | 0  | 24  | RDR2-sensitive |
| CGGTCCGAGGAACAAAAGGACGGAC | 0  | 10  | RDR2-sensitive |
| CGGTCCGACCAAAGCTGTTCCGAT  | 32 | 0   | RDR2-resistant |
| CGGTCCGCGACACAGTTGATGACGA | 0  | 12  | RDR2-sensitive |
| CGGTCCGCGCTCGGCTGCTCGTCGT | 0  | 9   | RDR2-sensitive |
| CGGTCCGCTACTCGTAGTGGGCCT  | 0  | 9   | RDR2-sensitive |
| CGGTCCGCTATAGAGGTACGTGTGT | 0  | 9   | RDR2-sensitive |
| CGGTCCGCTGACATGTAGGGGCGTG | 0  | 18  | RDR2-sensitive |
| CGGTCCGCTGTTACGGTAGTCCTTC | 0  | 15  | RDR2-sensitive |
| CGGTCCGAAACGGTATTTATTCGG  | 0  | 9   | RDR2-sensitive |
| CGGTCCGGCTGTGAATGCACGTGCG | 0  | 32  | RDR2-sensitive |
| CGGTCCGGTGCGGCGATTTGGTCAG | 0  | 9   | RDR2-sensitive |
| CGGTCCGTACCCTAGAGCCGGACGG | 0  | 23  | RDR2-sensitive |



|                           |    |     |                |
|---------------------------|----|-----|----------------|
| CGGTCGTGCTGACGGATACAGAAA  | 0  | 14  | RDR2-sensitive |
| CGGTCGTGTTCTCTGCATAGGCGT  | 0  | 11  | RDR2-sensitive |
| CGGTCGTTCTGCTTCCTGTGCGCG  | 0  | 10  | RDR2-sensitive |
| CGGTCTACGGTTCGAACAGTTCGT  | 0  | 15  | RDR2-sensitive |
| CGGTCTAGACTGGCATGCTGACCC  | 0  | 12  | RDR2-sensitive |
| CGGTCTAGATCCAAGCGCGGGCGT  | 98 | 8   | RDR2-resistant |
| CGGTCTAGCACAGCTCGAAGGCGG  | 1  | 28  | RDR2-sensitive |
| CGGTCTATTCGGGTTCCGGTTCGGG | 0  | 28  | RDR2-sensitive |
| CGGTCTCCTAGGCAGCCGTCCGAC  | 1  | 18  | RDR2-sensitive |
| CGGTCTCTAGCCAGTGTTGACGTG  | 20 | 2   | RDR2-resistant |
| CGGTCTCTAGCGAGCGTTGACGTG  | 0  | 14  | RDR2-sensitive |
| CGGTCTGAATTCGGCATGGCACGT  | 0  | 11  | RDR2-sensitive |
| CGGTCTGACAAGAGGACAGCGCCG  | 0  | 10  | RDR2-sensitive |
| CGGTCTGACAGAAGGACAGCGCCG  | 0  | 26  | RDR2-sensitive |
| CGGTCTGACAGTCTGGGTAGGCGC  | 0  | 16  | RDR2-sensitive |
| CGGTCTGAGCCTGGCACGATCCGG  | 0  | 19  | RDR2-sensitive |
| CGGTCTGAGTCCGGCACGGTAGAA  | 0  | 33  | RDR2-sensitive |
| CGGTCTGCGTCTGGAACCGTACGG  | 0  | 21  | RDR2-sensitive |
| CGGTCTGCTAGGCACGGTTAGAAA  | 0  | 11  | RDR2-sensitive |
| CGGTCTGCTGCTAGGGGATGACGG  | 0  | 13  | RDR2-sensitive |
| CGGTCTGGCCGATGGAACAGGCGC  | 0  | 16  | RDR2-sensitive |
| CGGTCTGGCTCTGACCCGGTCTGCT | 38 | 0   | RDR2-resistant |
| CGGTCTGGGCTAGCCGGAGACTGG  | 0  | 17  | RDR2-sensitive |
| CGGTCTGGGTGAGACGGTTGGCTC  | 0  | 12  | RDR2-sensitive |
| CGGTCTGTAAATCGGAGTGGGCGC  | 0  | 9   | RDR2-sensitive |
| CGGTCTGTAACCTAGGCACAGCAC  | 0  | 24  | RDR2-sensitive |
| CGGTCTGTAACCTGGGCGCAGGAG  | 0  | 20  | RDR2-sensitive |
| CGGTCTGTTCCGGTTCGGTTCGGG  | 0  | 15  | RDR2-sensitive |
| CGGTCTGTTGGGCCCCAGCATGGC  | 0  | 9   | RDR2-sensitive |
| CGGTCTTAAGGTCGGACGGTCCGC  | 0  | 17  | RDR2-sensitive |
| CGGTGAAAGGCTCGAAGGCGTGAT  | 48 | 1   | RDR2-resistant |
| CGGTGAACGACGTGACGACGGATG  | 0  | 9   | RDR2-sensitive |
| CGGTGAACTGTACATCGATAACGG  | 0  | 9   | RDR2-sensitive |
| CGGTGAACTGTACATCGGCAACAA  | 0  | 40  | RDR2-sensitive |
| CGGTGAACTGTACATCGGCAACAG  | 0  | 70  | RDR2-sensitive |
| CGGTGAATTATAGCCGTACGTCGC  | 1  | 19  | RDR2-sensitive |
| CGGTGAATTTTAGCCGTACGCCGT  | 0  | 9   | RDR2-sensitive |
| CGGTGAATTTTAGCCGTACGTCGT  | 0  | 10  | RDR2-sensitive |
| CGGTGACGAACTCCAAGCGGCCCA  | 0  | 55  | RDR2-sensitive |
| CGGTGACGACTCCTGATCCGGAAG  | 0  | 21  | RDR2-sensitive |
| CGGTGACTGTCCGGCCGAACGGGT  | 0  | 129 | RDR2-sensitive |
| CGGTGAGATTTTAGAGGACGGGTT  | 23 | 1   | RDR2-resistant |
| CGGTGAGTAGACGAGTCAAGCCGG  | 0  | 10  | RDR2-sensitive |
| CGGTGAGTTCTGACAGACTGACGA  | 0  | 13  | RDR2-sensitive |
| CGGTGATCCAAGACGAGACGGTGC  | 0  | 14  | RDR2-sensitive |
| CGGTGATGGCTGTAAGCGCGCGGA  | 0  | 21  | RDR2-sensitive |
| CGGTGCAGGATCTAGAAGACGAAG  | 0  | 30  | RDR2-sensitive |
| CGGTGCAGGTGAACGGACGGACGA  | 0  | 21  | RDR2-sensitive |
| CGGTGCAGTTGAACCCCTCGACGG  | 1  | 19  | RDR2-sensitive |

|                           |    |    |                |
|---------------------------|----|----|----------------|
| CGGTGCGACGTAGAGAAGACGCCG  | 0  | 16 | RDR2-sensitive |
| CGGTGCGACTGCAGGATGGGGCAT  | 0  | 15 | RDR2-sensitive |
| CGGTGCGGCTGGAGAGAGAGTGCG  | 0  | 10 | RDR2-sensitive |
| CGGTGCGGCTTGAAGGTGAAACGG  | 0  | 16 | RDR2-sensitive |
| CGGTGCGGTAAGTGGACTGTCCGGT | 0  | 11 | RDR2-sensitive |
| CGGTGCTACGAACCAGGGCAGGCT  | 0  | 15 | RDR2-sensitive |
| CGGTGCTCGAGGGGCAAGTCGGCA  | 18 | 1  | RDR2-resistant |
| CGGTGCTCGGAACTAGACGGTCTG  | 0  | 20 | RDR2-sensitive |
| CGGTGCTCGGTGGGCTTCGATCGT  | 0  | 9  | RDR2-sensitive |
| CGGTGCTCTCTGACCAGGCGCGGA  | 0  | 10 | RDR2-sensitive |
| CGGTGCTCTCTGCACAGGGGCGGA  | 0  | 18 | RDR2-sensitive |
| CGGTGCTCTCTGGTCAAGCGCGGA  | 0  | 9  | RDR2-sensitive |
| CGGTGCTCTCTGGTCAGACGCGGA  | 1  | 17 | RDR2-sensitive |
| CGGTGCTCTCTGGTCAGGCGCGGA  | 4  | 87 | RDR2-sensitive |
| CGGTGCTTTTGGGTAGGACGGTGC  | 1  | 24 | RDR2-sensitive |
| CGGTGCTTTTGGGTAGGACGGTGT  | 0  | 24 | RDR2-sensitive |
| CGGTGGAATAGCGAGCAGAGCCAG  | 0  | 13 | RDR2-sensitive |
| CGGTGGAATAGCGAGCCGAGCCAG  | 0  | 28 | RDR2-sensitive |
| CGGTGGACATACTTCTCAAGGCGT  | 0  | 22 | RDR2-sensitive |
| CGGTGGACATCAAGCTCGGGTCGG  | 0  | 10 | RDR2-sensitive |
| CGGTGGACATGGATACGGGTTGAA  | 0  | 9  | RDR2-sensitive |
| CGGTGGACTGGGACGAGCACGCAC  | 0  | 18 | RDR2-sensitive |
| CGGTGGAGACTTGGGGGCTGGGGT  | 20 | 0  | RDR2-resistant |
| CGGTGGAGCTTTCGGATCTGGCA   | 27 | 0  | RDR2-resistant |
| CGGTGGCACACTGGACAGTCCGAT  | 0  | 13 | RDR2-sensitive |
| CGGTGGCACACTGGACAGTCCGGT  | 4  | 26 | RDR2-sensitive |
| CGGTGGCAGAGACTGTAATTCAT   | 0  | 10 | RDR2-sensitive |
| CGGTGGCCGAAGCTCTGGCGGCAA  | 0  | 13 | RDR2-sensitive |
| CGGTGGGCTCGACCGAGATGGACA  | 0  | 17 | RDR2-sensitive |
| CGGTGGTGCCTGGACCGTGTGGT   | 0  | 13 | RDR2-sensitive |
| CGGTGGTGCATCGGACTGTCCGGT  | 1  | 12 | RDR2-sensitive |
| CGGTGGTGTCTCTGGTCAGACGT   | 0  | 14 | RDR2-sensitive |
| CGGTGGTGTCTCTGGTCAGGCGC   | 0  | 9  | RDR2-sensitive |
| CGGTGGTGGGTCTCGAAGTCGGTG  | 69 | 13 | RDR2-resistant |
| CGGTGTAAATAGCTCTAGAGACGT  | 0  | 12 | RDR2-sensitive |
| CGGTGTAACTGCGGGGCAACGGCT  | 1  | 35 | RDR2-sensitive |
| CGGTGTACCATTGGACTGTCCGGT  | 0  | 19 | RDR2-sensitive |
| CGGTGTACCTGTGCTCAAGACGT   | 0  | 14 | RDR2-sensitive |
| CGGTGTAGATTGGCTGAAGGCAGA  | 0  | 49 | RDR2-sensitive |
| CGGTGTCAACGAGGGATGGGACGG  | 0  | 13 | RDR2-sensitive |
| CGGTGTCCCCCGGGTAGAATGGC   | 0  | 14 | RDR2-sensitive |
| CGGTGTCTCTGAACCGACATTGGC  | 0  | 10 | RDR2-sensitive |
| CGGTGTGACTGTCCAACGAGCGTG  | 0  | 12 | RDR2-sensitive |
| CGGTGTGATCTTTAGAACCGGCCA  | 0  | 28 | RDR2-sensitive |
| CGGTGTGGAAGACGACTGCGCAGC  | 0  | 12 | RDR2-sensitive |
| CGGTGTGGACTCCGAGAAGACGAT  | 0  | 19 | RDR2-sensitive |
| CGGTGTGTGCTCCAAGAAGACGAT  | 1  | 14 | RDR2-sensitive |
| CGGTGTTAATATATTTTCGTTGGAG | 14 | 0  | RDR2-resistant |
| CGGTGTTCGGACGGTATACACGGT  | 0  | 10 | RDR2-sensitive |

|                            |    |     |                |
|----------------------------|----|-----|----------------|
| CGGTTACATCGGAACGAGACCCGG   | 0  | 16  | RDR2-sensitive |
| CGGTTAGTCGGCCTGGCTAGCAC    | 1  | 61  | RDR2-sensitive |
| CGGTTCACTACGTGTCTGTCTCGGG  | 0  | 10  | RDR2-sensitive |
| CGGTTCAGAACTTATTTCCGACGG   | 1  | 32  | RDR2-sensitive |
| CGGTTCAGATCGGTTAGACGACAT   | 0  | 13  | RDR2-sensitive |
| CGGTTCAGGACTTATTTCCGACGG   | 1  | 51  | RDR2-sensitive |
| CGGTTCAGGCTGTGTGGATCGGTT   | 0  | 22  | RDR2-sensitive |
| CGGTTCATGGTCAACTCGGTTCCGG  | 0  | 11  | RDR2-sensitive |
| CGGTTCATGGTCAGCTCGGCTCAG   | 0  | 10  | RDR2-sensitive |
| CGGTTCATGGTCAGCTCGGCTCGG   | 0  | 10  | RDR2-sensitive |
| CGGTTCCAGTCTCTGACCGAGCAA   | 2  | 50  | RDR2-sensitive |
| CGGTTCCATACGGGCTAGGACCAA   | 0  | 10  | RDR2-sensitive |
| CGGTTCCCTCTGCGTCGGTTCGGCT  | 0  | 9   | RDR2-sensitive |
| CGGTTCCGCGCTCTGGACCGGACGG  | 1  | 15  | RDR2-sensitive |
| CGGTTCCGGCTGTACGGGAAGCATG  | 0  | 11  | RDR2-sensitive |
| CGGTTCCGGCTGTGTGGATAGGTTG  | 0  | 14  | RDR2-sensitive |
| CGGTTCCGGCTGTGTGGATCGGTTG  | 0  | 12  | RDR2-sensitive |
| CGGTTCCGGTACGGTTCGGTTCGGT  | 2  | 66  | RDR2-sensitive |
| CGGTTCCGGTCTGGGTGGAGCGGTT  | 0  | 9   | RDR2-sensitive |
| CGGTTCCGGTTCGGTACGGTTCGGT  | 2  | 18  | RDR2-sensitive |
| CGGTTCCGTAGGCTGGACGGTCCGC  | 0  | 19  | RDR2-sensitive |
| CGGTTCCGTATTGAGTGATTGGCGC  | 0  | 13  | RDR2-sensitive |
| CGGTTCCGTTCGACAGCTAAGGCCGC | 1  | 231 | RDR2-sensitive |
| CGGTTCCGTGTTGAGTGATTGGCGC  | 0  | 18  | RDR2-sensitive |
| CGGTTCCGTTAACGAGCCAGGTCGG  | 0  | 12  | RDR2-sensitive |
| CGGTTCTCCAAGCACAAAGAGACAA  | 0  | 12  | RDR2-sensitive |
| CGGTTCTCCAAGCACAGGAGACAA   | 0  | 16  | RDR2-sensitive |
| CGGTTCTCCAAGCACAGTAGACAA   | 0  | 22  | RDR2-sensitive |
| CGGTTCTCCAAGCACATGAGACAA   | 0  | 16  | RDR2-sensitive |
| CGGTTCTCGGTTATTTCCGTTCCGG  | 0  | 20  | RDR2-sensitive |
| CGGTTCTCGGTTCTTCGGTTCGGT   | 0  | 16  | RDR2-sensitive |
| CGGTTCTCTAAGCACAGGAGACAA   | 0  | 12  | RDR2-sensitive |
| CGGTTCTGCCTCCTCACGACGCAT   | 0  | 11  | RDR2-sensitive |
| CGGTTCTTAGGGTACCGTCGGAAA   | 0  | 9   | RDR2-sensitive |
| CGGTTCTTCGGTTCGGTTCCTCGG   | 8  | 95  | RDR2-sensitive |
| CGGTTCTTCGGTTCGGTTCGGTTC   | 0  | 21  | RDR2-sensitive |
| CGGTTCTTCTTGAGTATTTGGCGC   | 2  | 18  | RDR2-sensitive |
| CGGTTCTTCTTGAGTGATTGGCGC   | 0  | 10  | RDR2-sensitive |
| CGGTTCTTGTTGAGTGATTGACGG   | 0  | 14  | RDR2-sensitive |
| CGGTTCTTGTTGAGTGATTGGCGC   | 1  | 34  | RDR2-sensitive |
| CGGTTCTTGTTGAGTGATTGGCGT   | 0  | 16  | RDR2-sensitive |
| CGGTTCTTGTTGAGTGTTTGGCAC   | 0  | 11  | RDR2-sensitive |
| CGGTTCTTGTTGAGTGTTTGGCGC   | 1  | 22  | RDR2-sensitive |
| CGGTTGAACCGACCCAGGAGCTGG   | 0  | 9   | RDR2-sensitive |
| CGGTTGAATTCGGTATCTTTGGTT   | 15 | 0   | RDR2-resistant |
| CGGTTGAGATTGCAGGATGGCAGA   | 0  | 17  | RDR2-sensitive |
| CGGTTGATGTGTGTGGGACGGAG    | 43 | 5   | RDR2-resistant |
| CGGTTGCGGCTGCGGCTTCTACAG   | 0  | 21  | RDR2-sensitive |
| CGGTTGGACCGCTGCAGAATGGAT   | 0  | 9   | RDR2-sensitive |

|                           |    |    |                |
|---------------------------|----|----|----------------|
| CGGTTGGACCGTTACAGAGTGGAT  | 0  | 13 | RDR2-sensitive |
| CGGTTGGACCGTTGCAGAGTGGAC  | 0  | 20 | RDR2-sensitive |
| CGGTTGGGATATAGGTGGGGGCAT  | 0  | 9  | RDR2-sensitive |
| CGGTTGGGATTCTGGAGACGCGA   | 0  | 9  | RDR2-sensitive |
| CGGTTGGGCATGTATTGACCGGTA  | 0  | 11 | RDR2-sensitive |
| CGGTTGGGCCGTTGCAGAGTGGAC  | 5  | 23 | RDR2-sensitive |
| CGGTTGTCAGAGCGGAGTAGACGA  | 0  | 10 | RDR2-sensitive |
| CGGTTGTTGGGAGTAGGAGGTCGAC | 1  | 13 | RDR2-sensitive |
| CGGTTTAAGGCTTATTCCCGTCGG  | 0  | 11 | RDR2-sensitive |
| CGGTTTAGGGCTTATTCCCGTCGG  | 1  | 22 | RDR2-sensitive |
| CGGTTTAGTGCTTATTCCCGTCGG  | 0  | 11 | RDR2-sensitive |
| CGGTTTCGGTTGGGTGTCGGGGGT  | 24 | 0  | RDR2-resistant |
| CGGTTTGGCTCAGAGCGGCTCCGT  | 0  | 19 | RDR2-sensitive |
| CGGTTTGGGGCTTACTTCCGTCGG  | 0  | 9  | RDR2-sensitive |
| CGGTTTTGTAGGATGGAAGCGGAT  | 0  | 9  | RDR2-sensitive |
| CGGTTTTTCGGTTCGGTTCCTCGG  | 0  | 9  | RDR2-sensitive |
| CGGTTTTTCTGCGGGTGATGAGAC  | 72 | 0  | RDR2-resistant |
| CGTAAACGAGATGCAGAGCTGCTT  | 0  | 11 | RDR2-sensitive |
| CGTAAACTCGATCCCCGTAGACGT  | 1  | 17 | RDR2-sensitive |
| CGTAAACAGGGGACGACATGGGACG | 0  | 28 | RDR2-sensitive |
| CGTAACTGCGTCGGCGCGTCGCGT  | 0  | 9  | RDR2-sensitive |
| CGTAAGTCGCTACTGACCGGCCAT  | 2  | 18 | RDR2-sensitive |
| CGTACATCGTCAGTCATCAGGCAC  | 3  | 31 | RDR2-sensitive |
| CGTACCAGAACTCCAGAAGAGCAG  | 0  | 10 | RDR2-sensitive |
| CGTACCAGGACTGCCGCGTGGCAC  | 2  | 21 | RDR2-sensitive |
| CGTACCCCTGTAGATGGTATGGCT  | 0  | 19 | RDR2-sensitive |
| CGTACCGCGGCACAGACACGGCAT  | 0  | 10 | RDR2-sensitive |
| CGTACCTGGGGTGTAGAAGGCAGG  | 0  | 9  | RDR2-sensitive |
| CGTACGAAGTCGGTGCAGGAAGAT  | 1  | 27 | RDR2-sensitive |
| CGTACGAGCAGCTGGGTTGGAGGA  | 23 | 2  | RDR2-resistant |
| CGTACGATGGGACGCATGATTCTT  | 0  | 10 | RDR2-sensitive |
| CGTACGCAGTCGACACAGGTAGAT  | 0  | 10 | RDR2-sensitive |
| CGTACGGCGAAGATGACGGGTCAT  | 0  | 11 | RDR2-sensitive |
| CGTACGGCGTACGGCGGAACACGG  | 0  | 10 | RDR2-sensitive |
| CGTACGGGCACACAGAGCGGTAGG  | 14 | 0  | RDR2-resistant |
| CGTACGTATTGGCTCGATCGTCGA  | 0  | 14 | RDR2-sensitive |
| CGTACTGGGACTAGAGGACGACGA  | 0  | 14 | RDR2-sensitive |
| CGTACTGTTCACGCTGACTTGCCA  | 17 | 58 | RDR2-sensitive |
| CGTAGAAACTCACACGCTCGGGGC  | 0  | 16 | RDR2-sensitive |
| CGTAGAAAGTGACTGCGACGACAT  | 0  | 10 | RDR2-sensitive |
| CGTAGAAATCCATCGGTTGTTGAA  | 24 | 1  | RDR2-resistant |
| CGTAGAACATTTCTTTGCAAGAGG  | 14 | 0  | RDR2-resistant |
| CGTAGAACTGCTTCCAGAGGTCGA  | 0  | 9  | RDR2-sensitive |
| CGTAGAAGCTGTAGCCGCAGTCGG  | 0  | 11 | RDR2-sensitive |
| CGTAGAATGGTAGAACGGCAGGCT  | 0  | 14 | RDR2-sensitive |
| CGTAGACACCCACCAGCAGGACAT  | 25 | 4  | RDR2-resistant |
| CGTAGACTCATGATCGAGCGGCTT  | 0  | 50 | RDR2-sensitive |
| CGTAGACTGGATGAGCGGATGCAA  | 0  | 34 | RDR2-sensitive |
| CGTAGAGAGCAGTAGAGCACCACC  | 0  | 10 | RDR2-sensitive |

|                          |    |     |                |
|--------------------------|----|-----|----------------|
| CGTAGAGCCTGAAGGCGTGGAGAG | 2  | 18  | RDR2-sensitive |
| CGTAGAGGACAGCGAGGAGCAGAG | 0  | 17  | RDR2-sensitive |
| CGTAGAGGGACCTGTTGAGCCGGC | 3  | 18  | RDR2-sensitive |
| CGTAGAGGGCGCTGTAGGGGGCAC | 2  | 29  | RDR2-sensitive |
| CGTAGAGTGCATCTGGCGCCGGAG | 20 | 2   | RDR2-resistant |
| CGTAGATAACCGCGGCCTTCACAG | 0  | 13  | RDR2-sensitive |
| CGTAGATCAAGAGGGCTTCTCCGG | 0  | 9   | RDR2-sensitive |
| CGTAGATCTCGAGCAAGGCAGAGT | 0  | 22  | RDR2-sensitive |
| CGTAGATCTTGGCGCCGAGGTAGG | 0  | 9   | RDR2-sensitive |
| CGTAGATCTTTGGTGGACGGTTGT | 0  | 18  | RDR2-sensitive |
| CGTAGCAACATCAAGGTAGAGCGT | 2  | 20  | RDR2-sensitive |
| CGTAGCAACTTTTGGTGACGTCAT | 0  | 10  | RDR2-sensitive |
| CGTAGCACGAACGGTGGACGCCAA | 0  | 10  | RDR2-sensitive |
| CGTAGCACGAACGGTGGGCGCCAA | 0  | 9   | RDR2-sensitive |
| CGTAGCAGTTCGGCTCGGCTCGAC | 0  | 9   | RDR2-sensitive |
| CGTAGCCTAGGGTGTAGAAGGCAG | 0  | 18  | RDR2-sensitive |
| CGTAGCCTGAGCTAGCTAGGGGTA | 1  | 17  | RDR2-sensitive |
| CGTAGCCTGGGGTGTAGAAGGCAG | 2  | 23  | RDR2-sensitive |
| CGTAGCGGGAGTGTGGACAGGTT  | 15 | 0   | RDR2-resistant |
| CGTAGGAAATCGGGCTGAGCCGGA | 0  | 17  | RDR2-sensitive |
| CGTAGGAAGTTAGTCAGCTGACCG | 0  | 13  | RDR2-sensitive |
| CGTAGGACAGATCGGCTAGGCCAG | 0  | 9   | RDR2-sensitive |
| CGTAGGACAGTTCGGCAAGGCCAA | 0  | 15  | RDR2-sensitive |
| CGTAGGACAGTTCGGCAAGGCCGG | 1  | 90  | RDR2-sensitive |
| CGTAGGACAGTTCGGCTAGACCAG | 0  | 9   | RDR2-sensitive |
| CGTAGGACAGTTCGGCTAGACCAG | 0  | 18  | RDR2-sensitive |
| CGTAGGACAGTTCGGCTAGGCCAA | 1  | 77  | RDR2-sensitive |
| CGTAGGACAGTTCGGCTAGGCCAG | 2  | 91  | RDR2-sensitive |
| CGTAGGACAGTTCGGCTAGGCCGG | 3  | 100 | RDR2-sensitive |
| CGTAGGACAGTTCGGCTAGGTCAG | 0  | 9   | RDR2-sensitive |
| CGTAGGACGACCCAGTAGAAGGCC | 0  | 11  | RDR2-sensitive |
| CGTAGGACGCCACAGATCGATCGG | 0  | 12  | RDR2-sensitive |
| CGTAGGACTGCTTACAGAGGTCGA | 0  | 9   | RDR2-sensitive |
| CGTAGGACTGCTTCCAGAGGTCGA | 0  | 53  | RDR2-sensitive |
| CGTAGGACTGTGCAGGCCCGGCC  | 0  | 25  | RDR2-sensitive |
| CGTAGGAGGAATAGGTCTGGCGGC | 0  | 20  | RDR2-sensitive |
| CGTAGGAGGCAAGGTGCAGCTCGG | 0  | 10  | RDR2-sensitive |
| CGTAGGATTGCTGCTTGATGGTTG | 0  | 12  | RDR2-sensitive |
| CGTAGGCTGGCGTGTAGAAGGCAG | 1  | 16  | RDR2-sensitive |
| CGTAGGGAGCGCTGTAGGGGGCAC | 1  | 15  | RDR2-sensitive |
| CGTAGGGCTGCAGGAACGGCAGAT | 0  | 33  | RDR2-sensitive |
| CGTAGGGCTGTGCGTTGCGGACAG | 0  | 30  | RDR2-sensitive |
| CGTAGGGGACGCTGTAGGGGGCAC | 0  | 9   | RDR2-sensitive |
| CGTAGGGGGCGCTGTAGAGGGCAC | 0  | 12  | RDR2-sensitive |
| CGTAGGGGGCGCTGTAGGAGGCAC | 0  | 12  | RDR2-sensitive |
| CGTAGGGGGCGCTGTAGGGGGCAC | 1  | 18  | RDR2-sensitive |
| CGTAGGTGTGTGTGATGTCGGCAT | 0  | 16  | RDR2-sensitive |
| CGTAGTAGACTATAGCGTCGGCGT | 0  | 9   | RDR2-sensitive |
| CGTATAAGCTGTAGAAGCCGGTAT | 0  | 21  | RDR2-sensitive |

|                            |    |     |                |
|----------------------------|----|-----|----------------|
| CGTATACAGGTCGAACGGATGCAA   | 0  | 9   | RDR2-sensitive |
| CGTATACTCTATCTGGGACGCTAT   | 0  | 9   | RDR2-sensitive |
| CGTATCATAGCGGATTGGTCTGAC   | 0  | 12  | RDR2-sensitive |
| CGTATGCGTTGGGCTGAGACGCGC   | 0  | 11  | RDR2-sensitive |
| CGTATGTAGAACCTGTGGGGGCGC   | 0  | 14  | RDR2-sensitive |
| CGTATGTCATGGGCTGCGGTGCGC   | 0  | 14  | RDR2-sensitive |
| CGTATGTGCGGACGACCCGATGGA   | 0  | 11  | RDR2-sensitive |
| CGTATTCTGTACAAGATGAGCTT    | 0  | 11  | RDR2-sensitive |
| CGTATTGACGAGGACAGGATGGT    | 0  | 9   | RDR2-sensitive |
| CGTATTGTTTGAATTTCCGGTTCGT  | 0  | 9   | RDR2-sensitive |
| CGTCAACGAGTCGGGTTGTTTGGG   | 4  | 25  | RDR2-sensitive |
| CGTCAACGATCGGCAGGGCGACAC   | 0  | 16  | RDR2-sensitive |
| CGTCAAGGACCAACTGAAGCGCAT   | 0  | 16  | RDR2-sensitive |
| CGTCAATCTTGAGCAGGTCGTCGT   | 1  | 15  | RDR2-sensitive |
| CGTCACACTGTAGCTGCCGACGGC   | 0  | 11  | RDR2-sensitive |
| CGTCACCGCCCACTCTGCAACGGC   | 1  | 39  | RDR2-sensitive |
| CGTCAGATCTACCGACGACGAGC    | 0  | 9   | RDR2-sensitive |
| CGTCAGATCTGGGACGGCCGCTGA   | 0  | 9   | RDR2-sensitive |
| CGTCAGCAGTAGAGGCGCAAGAAG   | 2  | 29  | RDR2-sensitive |
| CGTCAGCGGACAGACGTATAGCAT   | 0  | 13  | RDR2-sensitive |
| CGTCAGCTCTGGGACGGCCGCTGA   | 0  | 22  | RDR2-sensitive |
| CGTCAGCTTTGGGACGGCCGCTGA   | 0  | 14  | RDR2-sensitive |
| CGTCATCCCGTCGTTCTGTCGTCGTC | 28 | 0   | RDR2-resistant |
| CGTCATCCGGGTTGTAGGTGACGT   | 0  | 12  | RDR2-sensitive |
| CGTCATTGAGCTGTGGAGGACGG    | 0  | 44  | RDR2-sensitive |
| CGTCCACTCTGTAACAACGGTCCA   | 0  | 15  | RDR2-sensitive |
| CGTCCAGGCGAGTCGAACGAGCAT   | 0  | 9   | RDR2-sensitive |
| CGTCCATGCTGTCGGCCCGTACGG   | 0  | 14  | RDR2-sensitive |
| CGTCCATGTCTAGATCGTGCCGGG   | 0  | 18  | RDR2-sensitive |
| CGTCCATGTTTAGGCTGTATTGGC   | 0  | 19  | RDR2-sensitive |
| CGTCCCGACCTGTAGAATACCGG    | 0  | 25  | RDR2-sensitive |
| CGTCCGACGGCTGTCAGACAGGCT   | 0  | 11  | RDR2-sensitive |
| CGTCCGATCTCGGCTGAACGGCCC   | 22 | 0   | RDR2-resistant |
| CGTCCGCACCTGACCAGAGAGCAC   | 0  | 11  | RDR2-sensitive |
| CGTCCGCGACTGTGCAGAGACCAC   | 0  | 29  | RDR2-sensitive |
| CGTCCGCGCCTGACCAGAGAGCAC   | 8  | 196 | RDR2-sensitive |
| CGTCCGCGCCTGACCAGAGAGCAT   | 1  | 32  | RDR2-sensitive |
| CGTCCGCGCCTGTGCAGAGAGCAT   | 0  | 13  | RDR2-sensitive |
| CGTCCGCGGTCGGCAGAATGGAGC   | 1  | 13  | RDR2-sensitive |
| CGTCCGCGTCTGACCAGAGGGCAC   | 0  | 23  | RDR2-sensitive |
| CGTCCGGACATACACAGAGAAGAA   | 0  | 11  | RDR2-sensitive |
| CGTCCGGACGTACACAGAGGAGAA   | 0  | 12  | RDR2-sensitive |
| CGTCCGGACGTACGCAAAGGAGGA   | 0  | 15  | RDR2-sensitive |
| CGTCCGGACGTACGCAGAGGAGGA   | 1  | 26  | RDR2-sensitive |
| CGTCCGGACGTACGCAGATGAGGA   | 0  | 11  | RDR2-sensitive |
| CGTCCGGACGTACGTAGAGAAGGA   | 0  | 27  | RDR2-sensitive |
| CGTCCGGCTTGCGTAGAGAAGAC    | 0  | 10  | RDR2-sensitive |
| CGTCCGTAGAATCCATGTGCGCAT   | 0  | 19  | RDR2-sensitive |
| CGTCCGTAGTGTGTCGTCGGGAT    | 0  | 12  | RDR2-sensitive |

|                           |   |    |                |
|---------------------------|---|----|----------------|
| CGTCCGTTTGGCCCGTGGCACGGC  | 0 | 16 | RDR2-sensitive |
| CGTCCTCGAGCTGCAGCATGACGG  | 0 | 15 | RDR2-sensitive |
| CGTCCTGCTGAGCGGCGTCTCGT   | 0 | 10 | RDR2-sensitive |
| CGTCCTGTAGTCGGAGGAAGACGA  | 0 | 12 | RDR2-sensitive |
| CGTCGACCCTGCTGATTCCGGCGC  | 0 | 11 | RDR2-sensitive |
| CGTCGACGTGGCACCGAGCTCGGC  | 1 | 22 | RDR2-sensitive |
| CGTCGATCGCGGAGCTGACGGTGT  | 0 | 16 | RDR2-sensitive |
| CGTCGATCTCTGACGTGGCGTCGG  | 0 | 11 | RDR2-sensitive |
| CGTCGATTGGATGAGGACCGGCAC  | 0 | 14 | RDR2-sensitive |
| CGTCGTCAAGCTGAAGGCCGTCGT  | 0 | 36 | RDR2-sensitive |
| CGTCGTCAAGCTGAAGGTCGTCGT  | 0 | 10 | RDR2-sensitive |
| CGTCGTCGTTCCGTGCATCGTCAA  | 0 | 11 | RDR2-sensitive |
| CGTCGTCGTTCTGCGCATCAGCAA  | 0 | 12 | RDR2-sensitive |
| CGTCGCTGCGGAGGGCGTAGCAT   | 0 | 13 | RDR2-sensitive |
| CGTCGCTGTCTCGGAGATGAGGCGT | 0 | 14 | RDR2-sensitive |
| CGTCTACAGTGACTGTTCCGGTGGC | 0 | 9  | RDR2-sensitive |
| CGTCTAGACTTGAACCGGTAGTGT  | 0 | 12 | RDR2-sensitive |
| CGTCTCCCATCCAACGGTCGTCGT  | 0 | 14 | RDR2-sensitive |
| CGTCTCGGGCGTACCACGGCGCAA  | 0 | 16 | RDR2-sensitive |
| CGTCTCGGTTTGGCTCAGAGCGGC  | 0 | 10 | RDR2-sensitive |
| CGTCTGCAGAAACCGTCGGCCAG   | 0 | 10 | RDR2-sensitive |
| CGTCTGCAGAGCCTGAGCGGGCAG  | 3 | 21 | RDR2-sensitive |
| CGTCTGCGGCTCTGGCGTTGGCGT  | 0 | 10 | RDR2-sensitive |
| CGTCTGCGGTGGACTGGGACGAGC  | 0 | 17 | RDR2-sensitive |
| CGTCTGCGTCGCCGTAGAGGGCAC  | 0 | 12 | RDR2-sensitive |
| CGTCTGGAGACGTCTTGGATGGCC  | 0 | 9  | RDR2-sensitive |
| CGTCTGGGACTCTGGGAGGACGTC  | 0 | 9  | RDR2-sensitive |
| CGTCTGTATGCACTCAGGGGCGGA  | 0 | 59 | RDR2-sensitive |
| CGTCTTCATGCTGTAGAAGAGGGT  | 0 | 15 | RDR2-sensitive |
| CGTGAACAGACCACAGTCGGCAC   | 0 | 9  | RDR2-sensitive |
| CGTGAACGGGACGACTGTGAAGAC  | 0 | 18 | RDR2-sensitive |
| CGTGAACTTGTTGGGCGGAGACGA  | 0 | 9  | RDR2-sensitive |
| CGTGAAGACTAAAGTGAAGATCGA  | 0 | 9  | RDR2-sensitive |
| CGTGAAGACTGTGGCAGAGACTGT  | 0 | 17 | RDR2-sensitive |
| CGTGAAGAGACGCCTCTGGCTCGT  | 0 | 12 | RDR2-sensitive |
| CGTGAAGATCGGGCATCATGACGC  | 0 | 12 | RDR2-sensitive |
| CGTGAAGATCGGGCATCGTGACAC  | 0 | 17 | RDR2-sensitive |
| CGTGAAGATCGGGCATCGTGACGC  | 4 | 57 | RDR2-sensitive |
| CGTGAATAGGACTAGGGATGGCAA  | 0 | 9  | RDR2-sensitive |
| CGTGACGGACTTATTCGGGCGGT   | 0 | 14 | RDR2-sensitive |
| CGTGACTCGCAAGAACTAGCGGCG  | 0 | 9  | RDR2-sensitive |
| CGTGACTGGAACCGAGAGGAGGAA  | 0 | 10 | RDR2-sensitive |
| CGTGACTGGACCGTGGCTGCGGCA  | 0 | 18 | RDR2-sensitive |
| CGTGACTGGGCCTCTGGCCAGGCA  | 0 | 17 | RDR2-sensitive |
| CGTGACTGTGAGAGCGGGATGGAA  | 0 | 9  | RDR2-sensitive |
| CGTGACTGTGAGAGCGGGATGGGA  | 4 | 41 | RDR2-sensitive |
| CGTGACTGTGAGAGCGGGATTGGA  | 1 | 58 | RDR2-sensitive |
| CGTGACTGTTTCGGGCAACACGGA  | 1 | 21 | RDR2-sensitive |
| CGTGACTTGACGCAGGAGCGACTC  | 0 | 11 | RDR2-sensitive |

|                           |     |    |                |
|---------------------------|-----|----|----------------|
| CGTGACTTGGACGTAGGAGTGGCT  | 0   | 17 | RDR2-sensitive |
| CGTGAGAACTGGCACGTAGACCGC  | 0   | 19 | RDR2-sensitive |
| CGTGAGCAGATAGAACCGTGCACC  | 0   | 31 | RDR2-sensitive |
| CGTGAGCCTGGGCAGTTAGGACGC  | 1   | 15 | RDR2-sensitive |
| CGTGAGGAGGCAGAACCGTGCACC  | 0   | 21 | RDR2-sensitive |
| CGTGAGGCTATAGAGTAGAATGGC  | 0   | 17 | RDR2-sensitive |
| CGTGAGGTTGGTGGAGGCCGCGGA  | 26  | 2  | RDR2-resistant |
| CGTGAGTCTGTTAGTCGTGCCGGG  | 0   | 19 | RDR2-sensitive |
| CGTGATATCGTCAGTGGATCCGGA  | 0   | 13 | RDR2-sensitive |
| CGTGATCAACTCGGCTCGGCTGAC  | 0   | 13 | RDR2-sensitive |
| CGTGATCAGGAACAGGAGCAGAGA  | 0   | 25 | RDR2-sensitive |
| CGTGATGCCACAGATGATCGTCTT  | 0   | 10 | RDR2-sensitive |
| CGTGATTGGTTGCCGGATAAGCAG  | 0   | 21 | RDR2-sensitive |
| CGTGATTTAGAGGACGTTGTTGGA  | 0   | 9  | RDR2-sensitive |
| CGTGCAACTCATCGCGGATCGTC   | 0   | 13 | RDR2-sensitive |
| CGTGCAGGTCCGGACGTGGGCGGC  | 5   | 38 | RDR2-sensitive |
| CGTGCAGTCGTGCGGTCCTTCAC   | 25  | 0  | RDR2-resistant |
| CGTGCAGTGA CTGTAGATGGGCTA | 0   | 45 | RDR2-sensitive |
| CGTGCCACAGGTCAAACGGACGAC  | 0   | 10 | RDR2-sensitive |
| CGTGCCACGGTGGAAAGAAGCTGGT | 114 | 31 | RDR2-resistant |
| CGTGCCGGGGACTCGACAAGTCGG  | 0   | 17 | RDR2-sensitive |
| CGTGCCGGGTGGCCGTTTTGGACA  | 0   | 19 | RDR2-sensitive |
| CGTGCCCTGGACCGTGCTTTTTCTG | 0   | 9  | RDR2-sensitive |
| CGTGCCCTCGTTGGGCCGTGCCGG  | 0   | 12 | RDR2-sensitive |
| CGTGCCTTTTGTGCCAGTCGTGCA  | 3   | 36 | RDR2-sensitive |
| CGTGCCTTTTGTGCTAGTCGTGCA  | 0   | 12 | RDR2-sensitive |
| CGTGCGAACTGATCGTGGTGGGCC  | 0   | 10 | RDR2-sensitive |
| CGTGCGACGTGTAGAGTGACGTGC  | 0   | 14 | RDR2-sensitive |
| CGTGCGACTGGGTAGGCAGCGCGA  | 0   | 11 | RDR2-sensitive |
| CGTGCGAGAAGCCGAGAACACCAG  | 0   | 10 | RDR2-sensitive |
| CGTGCGCTGTGTGGACACGACGTC  | 0   | 9  | RDR2-sensitive |
| CGTGCGGAAGGCCAGGTAGAGCGG  | 0   | 21 | RDR2-sensitive |
| CGTGCGGAGGTATAGATGGCCAAA  | 0   | 13 | RDR2-sensitive |
| CGTGCGGATGTATAGATGGCCAAA  | 0   | 9  | RDR2-sensitive |
| CGTGCGGCTGGATGGCATAGGCAA  | 0   | 12 | RDR2-sensitive |
| CGTGCGTTGCTACGGATAGATCGT  | 0   | 9  | RDR2-sensitive |
| CGTGCTGAATCCTTTGCAGACGAC  | 17  | 0  | RDR2-resistant |
| CGTGCTGACTGTGCCGGACGAGCA  | 0   | 12 | RDR2-sensitive |
| CGTGCTGCGGGCTGTGCGGTGCGC  | 0   | 21 | RDR2-sensitive |
| CGTGCTGGACCAGGCTTCGTGCTA  | 0   | 12 | RDR2-sensitive |
| CGTGCTGTCCGTGCGCGTTCGTCTG | 0   | 10 | RDR2-sensitive |
| CGTGCTGTGAGCAGGAGCTGATG   | 0   | 19 | RDR2-sensitive |
| CGTGCTGTGCTGACACAACCGGAT  | 0   | 9  | RDR2-sensitive |
| CGTGCTGTTGACTGCAGGAACGG   | 0   | 10 | RDR2-sensitive |
| CGTGCTTCCGGACTGGCCCGGCAT  | 0   | 12 | RDR2-sensitive |
| CGTGCTTCGGGCCGGCCCATCAGG  | 0   | 9  | RDR2-sensitive |
| CGTGCTTCGTGCCGGGCTAACGGG  | 0   | 12 | RDR2-sensitive |
| CGTGCTTGA ACTGACTAGGAGCAT | 0   | 21 | RDR2-sensitive |
| CGTGCTTGGACAGGTAGGCCGGCC  | 0   | 11 | RDR2-sensitive |



|                            |    |     |                |
|----------------------------|----|-----|----------------|
| CGTGCTTGGGCAAACGGCTGGCAC   | 0  | 33  | RDR2-sensitive |
| CGTGGA AATTGAGGGGGCTGGCCT  | 0  | 14  | RDR2-sensitive |
| CGTGGAACAATGGGTTGCTGGCAC   | 0  | 22  | RDR2-sensitive |
| CGTGGAACGCCTAGGACAACGGTG   | 0  | 29  | RDR2-sensitive |
| CGTGGA ACTGTT CAGCCGGTGCTC | 0  | 9   | RDR2-sensitive |
| CGTGGAAGGCCAGGTAGAGCGGTT   | 1  | 40  | RDR2-sensitive |
| CGTGGAATGGACGAGCCGAGCCGA   | 1  | 125 | RDR2-sensitive |
| CGTGGAATTAGGCTCGGCTCGGGC   | 0  | 13  | RDR2-sensitive |
| CGTGGAATTGTAGGTGACACGGTT   | 1  | 15  | RDR2-sensitive |
| CGTGGACACCTAGCTCGGCGCCAT   | 0  | 11  | RDR2-sensitive |
| CGTGGACATGAACTAGGCACGGT    | 0  | 17  | RDR2-sensitive |
| CGTGGACCAATCAGAAGCCGCCAC   | 0  | 11  | RDR2-sensitive |
| CGTGGACCAATCAGATCGCGACAC   | 2  | 157 | RDR2-sensitive |
| CGTGGACCAATCAGATCGCGCCAC   | 0  | 40  | RDR2-sensitive |
| CGTGGACCAATCAGATCGCGTCAC   | 0  | 9   | RDR2-sensitive |
| CGTGGACCAGTCAGATCGCGCCAC   | 0  | 43  | RDR2-sensitive |
| CGTGGACCAGTCAGATCGCGTCAC   | 0  | 33  | RDR2-sensitive |
| CGTGGACCGTCCAGACGTACGCAT   | 0  | 11  | RDR2-sensitive |
| CGTGGACCGTCTGACCTAGAGGTA   | 0  | 9   | RDR2-sensitive |
| CGTGGACGCACGTGGAAGCCGGAT   | 0  | 16  | RDR2-sensitive |
| CGTGGACGCATGTAGGAGCGGGAA   | 0  | 33  | RDR2-sensitive |
| CGTGGACGTCACCCTCGGCTCCGG   | 1  | 22  | RDR2-sensitive |
| CGTGGACGCTCCCTCGGCTCCGG    | 8  | 64  | RDR2-sensitive |
| CGTGGACTCCGTAGCAAAGCACGG   | 0  | 11  | RDR2-sensitive |
| CGTGGACTGGCCTCTCCGGCGAAG   | 0  | 12  | RDR2-sensitive |
| CGTGGAGA ACTGAGTGACGCGCGT  | 0  | 9   | RDR2-sensitive |
| CGTGGAGCAATGTAAGACGTCCAT   | 0  | 24  | RDR2-sensitive |
| CGTGGAGTCTGTTAGGCAGTTCGT   | 0  | 9   | RDR2-sensitive |
| CGTGGATAACGTA ACTCCCGTCGG  | 0  | 28  | RDR2-sensitive |
| CGTGGATATGACTGCGGGCGGATA   | 1  | 29  | RDR2-sensitive |
| CGTGGATCATTACAGGGGCTTCGG   | 0  | 11  | RDR2-sensitive |
| CGTGGATCTGACGTGGCAGTACCT   | 0  | 21  | RDR2-sensitive |
| CGTGGATCTGAGCAGCCAAGCAGC   | 0  | 18  | RDR2-sensitive |
| CGTGGATCTGTTGATGTACGGCTC   | 0  | 9   | RDR2-sensitive |
| CGTGGATGTAGAAATAGGGGTGGT   | 0  | 9   | RDR2-sensitive |
| CGTGGATTCGTGATTGGCGATGGG   | 27 | 0   | RDR2-resistant |
| CGTGGCAATTGTAGGCGTGGCATC   | 0  | 15  | RDR2-sensitive |
| CGTGGCCACAGGAACTGAGGGGTA   | 14 | 0   | RDR2-resistant |
| CGTGGCCTGGCTGGATGGAGCGGT   | 0  | 9   | RDR2-sensitive |
| CGTGGCTCGCTGGCTCGCTCGGAT   | 0  | 30  | RDR2-sensitive |
| CGTGGCTCTGGACCGGACGGTCTG   | 0  | 19  | RDR2-sensitive |
| CGTGGCTGCGGCATGTGGATCGAT   | 0  | 12  | RDR2-sensitive |
| CGTGGCTTGTAGTGGGCTTTTCGC   | 10 | 56  | RDR2-sensitive |
| CGTGGCTTTTGATCTCGGCGTCAT   | 1  | 21  | RDR2-sensitive |
| CGTGGGAGCTCAGACGGATTT CAG  | 0  | 11  | RDR2-sensitive |
| CGTGGGATTGTAGTGTTAGCACGG   | 0  | 27  | RDR2-sensitive |
| CGTGGGCCTCTGAGCTGGACGAGG   | 1  | 17  | RDR2-sensitive |
| CGTGGGCTGGTACAACACGGTCTG   | 0  | 21  | RDR2-sensitive |
| CGTGGGGCTCACAGGGCACGACGC   | 0  | 16  | RDR2-sensitive |

|                           |    |    |                |
|---------------------------|----|----|----------------|
| CGTGGGTCCTGTTTGTTCGGCTT   | 0  | 11 | RDR2-sensitive |
| CGTGGGTGATAGAACGGACGGTGC  | 0  | 10 | RDR2-sensitive |
| CGTGGTATTGTTTCGGCTCATGTC  | 16 | 0  | RDR2-resistant |
| CGTGGTCAGCTCGGCTCGGCTCGG  | 0  | 26 | RDR2-sensitive |
| CGTGGTGCTTTTAGGTAGGACGGT  | 0  | 10 | RDR2-sensitive |
| CGTGGTGCTTTTGAGTAGGACGGT  | 0  | 27 | RDR2-sensitive |
| CGTGGTGCTTTGGGTAGGACGGT   | 0  | 35 | RDR2-sensitive |
| CGTGGTGGATGAACAGCGGACGTT  | 16 | 0  | RDR2-resistant |
| CGTGTACAGCAACGACGGACGCAA  | 0  | 10 | RDR2-sensitive |
| CGTGTACTTGAGGGAACGAGGCTC  | 0  | 9  | RDR2-sensitive |
| CGTGTAGAATAGAGGACGCGACAC  | 0  | 12 | RDR2-sensitive |
| CGTGTAGATCTCCCGCATGTCGT   | 0  | 15 | RDR2-sensitive |
| CGTGTAGCGCTCTGCGAGAGGTAT  | 0  | 29 | RDR2-sensitive |
| CGTGTAGTGGGCTGCGATGGCACC  | 0  | 14 | RDR2-sensitive |
| CGTGTCACGGACCAAACGGGCGGC  | 0  | 9  | RDR2-sensitive |
| CGTGTCAGCTGTGGAACGGTAAG   | 1  | 18 | RDR2-sensitive |
| CGTGTCACGGAAACGGCTCTCAA   | 0  | 15 | RDR2-sensitive |
| CGTGTCACGTCACTGATCGGCTC   | 44 | 0  | RDR2-resistant |
| CGTGTCTAACCGTGTCTGATCGT   | 0  | 10 | RDR2-sensitive |
| CGTGTGCAACCACTGGAAGGGCAC  | 0  | 22 | RDR2-sensitive |
| CGTGTCCGCACTGTAGGTCGGCTT  | 0  | 76 | RDR2-sensitive |
| CGTGTCCGGGTCACGGGCCAAACGG | 0  | 16 | RDR2-sensitive |
| CGTGTCTGCTCAGGAAGAGGTAT   | 0  | 9  | RDR2-sensitive |
| CGTGTCTGCTGTGGAACGGTAAG   | 2  | 15 | RDR2-sensitive |
| CGTGTCTTACGTCCGATAGCGGA   | 0  | 15 | RDR2-sensitive |
| CGTGTCTTCGTTGGGTCGTGACGG  | 0  | 9  | RDR2-sensitive |
| CGTGTCTTCACTGTGGATAGGCG   | 0  | 22 | RDR2-sensitive |
| CGTGTGCGTTATCGAGCTCGTCGT  | 0  | 17 | RDR2-sensitive |
| CGTGTGGACTACGTGGAGGCGCAA  | 0  | 9  | RDR2-sensitive |
| CGTGTGGACTATGTGGAAGCGCAG  | 0  | 10 | RDR2-sensitive |
| CGTGTGGCATAAGTACGGCGTCGG  | 0  | 9  | RDR2-sensitive |
| CGTGTGTGAATCTGAGCGTCGGCA  | 47 | 7  | RDR2-resistant |
| CGTGTTACGGACCAAACGGACGGC  | 0  | 15 | RDR2-sensitive |
| CGTGTTATCTCGGTGCCATGGCTT  | 0  | 13 | RDR2-sensitive |
| CGTGTTATTTTCGTCCGGCCGGCCC | 0  | 11 | RDR2-sensitive |
| CGTTAATTGATCCGGACCGTCCGT  | 0  | 16 | RDR2-sensitive |
| CGTTACCTATGGATTGGACGGGAT  | 0  | 9  | RDR2-sensitive |
| CGTTACGTATGGATTGGACGGGAT  | 0  | 13 | RDR2-sensitive |
| CGTTACTTCTAGTTAGAACGTCTGT | 45 | 1  | RDR2-resistant |
| CGTTAGTTGACGGGCCGTGCCGG   | 0  | 10 | RDR2-sensitive |
| CGTTAGTAACTCGGCTCGACTCGG  | 0  | 11 | RDR2-sensitive |
| CGTTAGTAGCTCGGCTCGACTCGG  | 1  | 59 | RDR2-sensitive |
| CGTTATAATGGATTAGTGATACTA  | 93 | 6  | RDR2-resistant |
| CGTTATATTTGTAGAGTGGCCCAG  | 0  | 12 | RDR2-sensitive |
| CGTTATCTCCGGACGGCTAAGCCC  | 0  | 10 | RDR2-sensitive |
| CGTTATGACTGTGGGGGATGTCGG  | 0  | 26 | RDR2-sensitive |
| CGTTCAATTGGACCAGGCTGAGGC  | 0  | 9  | RDR2-sensitive |
| CGTTCACTCCACGGAACCTCGTCGT | 0  | 12 | RDR2-sensitive |
| CGTTCAGGACGAGCATGCATGCAT  | 2  | 16 | RDR2-sensitive |

|                           |    |     |                |
|---------------------------|----|-----|----------------|
| CGTTCCTGTAGCGAGCCGAGCCGA  | 0  | 15  | RDR2-sensitive |
| CGTTCGAAGGCGGACTTGGATCGT  | 0  | 33  | RDR2-sensitive |
| CGTTGAGCTGTGGAAGATGGCCC   | 2  | 22  | RDR2-sensitive |
| CGTTGATCCGACGACAACGGCAA   | 0  | 9   | RDR2-sensitive |
| CGTTGACGCCTGGCTCGATGGC    | 0  | 10  | RDR2-sensitive |
| CGTTGAGCGATGTAGGGAAGGA    | 0  | 18  | RDR2-sensitive |
| CGTTGCGCCGGACAGTCACCGGAT  | 0  | 17  | RDR2-sensitive |
| CGTTGCGTTGTACGCAGGGGCGGA  | 0  | 13  | RDR2-sensitive |
| CGTTGCTGACTTGGGTATAGGG    | 40 | 2   | RDR2-resistant |
| CGTTCTTACAGCGAGGTCGCGGAT  | 0  | 25  | RDR2-sensitive |
| CGTTGACACTGCGGACGGTGAGAG  | 0  | 18  | RDR2-sensitive |
| CGTTGACGTGGCACCGAGCTCGGC  | 4  | 25  | RDR2-sensitive |
| CGTTGACTGAGGGCGCGGTGGCGT  | 0  | 22  | RDR2-sensitive |
| CGTTGATCCTGGAGTGGACGAGGT  | 0  | 12  | RDR2-sensitive |
| CGTTGATGCTTCGGGCCAGGTCGG  | 0  | 14  | RDR2-sensitive |
| CGTTGATGCTTCGGGCCGGGTCGG  | 0  | 37  | RDR2-sensitive |
| CGTTGATGCTTCGGGCCGGGTCGT  | 0  | 9   | RDR2-sensitive |
| CGTTGATGCTTCGGGCTGGGTCGG  | 0  | 11  | RDR2-sensitive |
| CGTTGCAGAGTAGGCCATGACGGT  | 0  | 11  | RDR2-sensitive |
| CGTTGCAGAGTGGACAGTTGACGC  | 0  | 159 | RDR2-sensitive |
| CGTTGCAGAGTGGACAGTTGACGT  | 0  | 11  | RDR2-sensitive |
| CGTTGCAGAGTGGACGGTTGACAC  | 0  | 11  | RDR2-sensitive |
| CGTTGCAGAGTGGACGGTTGACGC  | 0  | 10  | RDR2-sensitive |
| CGTTGCATCGGAAGAGGACGGACG  | 0  | 21  | RDR2-sensitive |
| CGTTGCCACGGCAGAGCTCGGCAC  | 0  | 39  | RDR2-sensitive |
| CGTTGCCGGAGAAGGACACGACGA  | 1  | 21  | RDR2-sensitive |
| CGTTGCGACGGCTCACAAACAACAC | 0  | 9   | RDR2-sensitive |
| CGTTGCTGAACACGTAGAGGACAA  | 0  | 23  | RDR2-sensitive |
| CGTTGCTGGAGAGCGTAGAGGACC  | 0  | 16  | RDR2-sensitive |
| CGTTGCTGGAGGGAGTAGAGGACA  | 0  | 9   | RDR2-sensitive |
| CGTTGCTGGAGGGAGTAGAGGACG  | 4  | 31  | RDR2-sensitive |
| CGTTGGAGCTCTGACTGGTGGGGC  | 1  | 14  | RDR2-sensitive |
| CGTTGGAGTTGGACGCGACGCGGA  | 0  | 12  | RDR2-sensitive |
| CGTTGGATGTGGAGGGTGTGGTCT  | 0  | 35  | RDR2-sensitive |
| CGTTGGCGCACTGTTGGCACACAG  | 0  | 9   | RDR2-sensitive |
| CGTTGGCTCTCGGCAAAGACTGAC  | 2  | 51  | RDR2-sensitive |
| CGTTGGCTTCTCTGTTCTGGAGAC  | 0  | 16  | RDR2-sensitive |
| CGTTGGTGGCTGACTGCAAGCAAA  | 30 | 0   | RDR2-resistant |
| CGTTGTACGGCGTGGTAGACGGGC  | 0  | 9   | RDR2-sensitive |
| CGTTGTATCGCACGAGACAGGCTA  | 0  | 32  | RDR2-sensitive |
| CGTTGTTGGAGGGGTAGAGGACGT  | 2  | 45  | RDR2-sensitive |
| CGTTTAATAGTGTCTGGGCCGGGCC | 0  | 10  | RDR2-sensitive |
| CGTTTACTGTAGTGCACGGCCTGT  | 0  | 17  | RDR2-sensitive |
| CGTTTAGAGGACGCTGCTGGAGAG  | 0  | 9   | RDR2-sensitive |
| CGTTTAGGACAACGACACGGTCTC  | 0  | 20  | RDR2-sensitive |
| CGTTTAGGGCAGTGGGTAACGGTT  | 0  | 11  | RDR2-sensitive |
| CGTTTATTCGTACCGGGGCGGCTC  | 0  | 13  | RDR2-sensitive |
| CGTTTCTGTGGAGCCAGGCTGAGA  | 0  | 36  | RDR2-sensitive |
| CGTTTCTTTTTATTTGTCGCTGGA  | 9  | 32  | RDR2-sensitive |

|                           |    |     |                |
|---------------------------|----|-----|----------------|
| CGTTTGAATTTTCGGGCCGTGCCGG | 0  | 11  | RDR2-sensitive |
| CGTTTGAATTTTGGGTCGTATCGG  | 0  | 9   | RDR2-sensitive |
| CGTTTGGCACGAAGCACGATGGGC  | 0  | 11  | RDR2-sensitive |
| CGTTTGTAACCTCAGCGAGCGTCAT | 0  | 22  | RDR2-sensitive |
| CGTTTGTGACGACCGTAGATGGCC  | 0  | 12  | RDR2-sensitive |
| CGTTTGTGGTTGCTGGATACAT    | 0  | 20  | RDR2-sensitive |
| CGTTTTAGAGTTTGTCTGGTCCCT  | 0  | 9   | RDR2-sensitive |
| CGTTTTCGGAATGGGTGACGTGCG  | 2  | 20  | RDR2-sensitive |
| CGTTTTGAGCCTGGCGGACGGTCC  | 0  | 9   | RDR2-sensitive |
| CGTTTTTCTCGGGCGCAGTAACGG  | 0  | 12  | RDR2-sensitive |
| CTAAAAGAGCAGTGCGGACGGTC   | 0  | 16  | RDR2-sensitive |
| CTAAAAGCAGTGGGTCGAGCAGCTC | 3  | 24  | RDR2-sensitive |
| CTAAACTCTGGAGCAGAGCTGCTC  | 1  | 177 | RDR2-sensitive |
| CTAAATTATTTTCGGATCGTGTCTG | 0  | 9   | RDR2-sensitive |
| CTAAATTGGACTGAGCAGGGGATA  | 0  | 9   | RDR2-sensitive |
| CTAAATTTTCGGTCCGTCGGCCCAT | 0  | 15  | RDR2-sensitive |
| CTAACAGGACGGCTGAAAGCACAC  | 0  | 28  | RDR2-sensitive |
| CTAACATTCGGCGAACGCGGCGTT  | 0  | 12  | RDR2-sensitive |
| CTAACCCGCCATGGCGTTCGTCTG  | 0  | 11  | RDR2-sensitive |
| CTAACCGTCCAGGCTTGTGGCATG  | 0  | 10  | RDR2-sensitive |
| CTAACCGTGACTGTCGGGCCAGGC  | 0  | 19  | RDR2-sensitive |
| CTAACCGTGTCTGGTGGGTCGGGC  | 0  | 12  | RDR2-sensitive |
| CTAACGGGCTGGCCTGAAGCACGG  | 0  | 10  | RDR2-sensitive |
| CTAACGGGCTGGTTCGAAACACGG  | 0  | 13  | RDR2-sensitive |
| CTAACGTGGGTCGGGGCGGGCGGC  | 32 | 1   | RDR2-resistant |
| CTAACGTGTCGGGCTGGCACGGCT  | 0  | 13  | RDR2-sensitive |
| CTAACTGACTCTGCGCACGCACGG  | 0  | 12  | RDR2-sensitive |
| CTAACTGACTCTGCGCACGCACGG  | 0  | 86  | RDR2-sensitive |
| CTAACTGACTCTGCGCGCGCGCGG  | 1  | 24  | RDR2-sensitive |
| CTAACTGACTCTGCGCGCGCGGAC  | 1  | 21  | RDR2-sensitive |
| CTAACTGACTCTGTGCACGCACGG  | 0  | 9   | RDR2-sensitive |
| CTAACTTATCGAGCGGATCGACGT  | 0  | 27  | RDR2-sensitive |
| CTAACTTATTGGACGGATCGGCGT  | 3  | 31  | RDR2-sensitive |
| CTAACTTGTTCGGACGGGCCGGTGT | 1  | 16  | RDR2-sensitive |
| CTAACTTTTCAGTGGGACATTCGAC | 41 | 4   | RDR2-resistant |
| CTAAGACTTTAGGCCTTGTTCGGT  | 0  | 9   | RDR2-sensitive |
| CTAAGATCTGTGGCGCCAAGGTAT  | 0  | 12  | RDR2-sensitive |
| CTAAGCGACGCTGAGCAGAAGATT  | 0  | 11  | RDR2-sensitive |
| CTAAGCGACGCTGAGCAGAGGACT  | 0  | 19  | RDR2-sensitive |
| CTAAGCGTTTTTGCCTGTTAGTCGG | 0  | 9   | RDR2-sensitive |
| CTAAGGCTCAGCCCCGATCGCGGT  | 0  | 9   | RDR2-sensitive |
| CTAAGGTTAGGCAGATTGTGGCGC  | 0  | 13  | RDR2-sensitive |
| CTAAGGTTAGGCAGATTGTGGCGT  | 1  | 24  | RDR2-sensitive |
| CTAAGGTTAGTCGTTTCAATTGAA  | 0  | 12  | RDR2-sensitive |
| CTAAGTCTGTGGGCAAGATGGCCT  | 0  | 12  | RDR2-sensitive |
| CTAAGTGTAGATCGCTGAAGGCAT  | 0  | 10  | RDR2-sensitive |
| CTAAGTTCGGGCCAATCGGGTAT   | 0  | 11  | RDR2-sensitive |
| CTAATACGATAAGTTCGACGGTTT  | 0  | 9   | RDR2-sensitive |
| CTAATACTGTAAGTTCGACGGTTT  | 0  | 16  | RDR2-sensitive |

|                           |    |    |                |
|---------------------------|----|----|----------------|
| CTAATACTGTAAGTTTGACGGTTT  | 1  | 16 | RDR2-sensitive |
| CTAATATATCGGGCTATGTCGGAC  | 0  | 11 | RDR2-sensitive |
| CTAATCATGTTGGACGGGCCGGCT  | 0  | 10 | RDR2-sensitive |
| CTAATCGGACTTATGCCGGGTCGG  | 0  | 15 | RDR2-sensitive |
| CTAATCTCGGGATACGCAGACGGT  | 0  | 13 | RDR2-sensitive |
| CTAATGAGTCGGGCGTCCGGACGG  | 0  | 13 | RDR2-sensitive |
| CTAATGCGGGGGACAGGGAGGCAC  | 1  | 14 | RDR2-sensitive |
| CTAATGGACGGGCACGAAGCACGA  | 0  | 33 | RDR2-sensitive |
| CTAATGGGCGGGCACGAAGCACGA  | 0  | 11 | RDR2-sensitive |
| CTAATGTATTTCTCTCGGATACGG  | 0  | 10 | RDR2-sensitive |
| CTAATGTTATGGACTCGCATGTTG  | 20 | 0  | RDR2-resistant |
| CTAATTGTGGGACTGGGCCGGCAC  | 3  | 84 | RDR2-sensitive |
| CTAATTGTGGGCCTGGGCCGGCAC  | 1  | 14 | RDR2-sensitive |
| CTAATTGTGGGCTGTGCCGTGGGC  | 21 | 0  | RDR2-resistant |
| CTAATTGTGGGTCTGGGCCGGCAC  | 1  | 42 | RDR2-sensitive |
| CTAATTGTGGGTCTGGGCCGGCAT  | 1  | 27 | RDR2-sensitive |
| CTACACACGGGCTGCACGAAAAG   | 0  | 11 | RDR2-sensitive |
| CTACACATGTGTGGACTGTCCGGC  | 0  | 27 | RDR2-sensitive |
| CTACACCTCTGAGTCTGCCGGCAC  | 0  | 28 | RDR2-sensitive |
| CTACACTGTCGAGACTAAGGCTAT  | 0  | 9  | RDR2-sensitive |
| CTACAGAAATAGGCCTCGATCGAC  | 17 | 0  | RDR2-resistant |
| CTACAGAAATAGGCCTCGATCGAT  | 68 | 0  | RDR2-resistant |
| CTACAGATAGCGGACGCATGTCAT  | 0  | 9  | RDR2-sensitive |
| CTACAGATCGCTGAACGCTGACGG  | 0  | 12 | RDR2-sensitive |
| CTACAGCGCCCCCTACGTGTCGGT  | 0  | 22 | RDR2-sensitive |
| CTACATACATGTGGGTCTGTCGGAG | 0  | 10 | RDR2-sensitive |
| CTACATGTAGCGGCTGAAGCAGAG  | 0  | 10 | RDR2-sensitive |
| CTACATGTGGCACTGTCGTTTGGG  | 20 | 1  | RDR2-resistant |
| CTACCAAGTGGGCTAGATGGGCTT  | 3  | 32 | RDR2-sensitive |
| CTACCACCTGTAGCCTGACGGTGA  | 0  | 14 | RDR2-sensitive |
| CTACCCACAGGTATAATCACGGAC  | 0  | 11 | RDR2-sensitive |
| CTACCCACAGGTATAGTCGCGGAC  | 0  | 60 | RDR2-sensitive |
| CTACCCACGGGTATAGTCGCGGGC  | 0  | 12 | RDR2-sensitive |
| CTACCCGTGGGTCTGTTATTGGGC  | 3  | 43 | RDR2-sensitive |
| CTACCCTCAGTAAAGGTTGTCGGT  | 0  | 9  | RDR2-sensitive |
| CTACCGACGACTGTACAGATTGCA  | 0  | 9  | RDR2-sensitive |
| CTACCGATTGCTGGACTGGATGGT  | 0  | 9  | RDR2-sensitive |
| CTACCGTCAGCAGTAGAGGCGCAA  | 0  | 10 | RDR2-sensitive |
| CTACCGTCTCGGACAGGCAGTGGA  | 0  | 11 | RDR2-sensitive |
| CTACCTATCGGGCCGTGCCGGCAC  | 0  | 12 | RDR2-sensitive |
| CTACCTCGTTGGGCTGCTCGGTAG  | 0  | 10 | RDR2-sensitive |
| CTACCTGAAGGAGGACGAACGGTT  | 0  | 15 | RDR2-sensitive |
| CTACCTGTAGCGCTGACTCTTGGC  | 21 | 2  | RDR2-resistant |
| CTACCTGTCAGAGACCGAACCGGC  | 0  | 11 | RDR2-sensitive |
| CTACCTTAGGGGTTTCAGAGATCGT | 0  | 12 | RDR2-sensitive |
| CTACGACGAGCAAACCTGAGGCGC  | 0  | 9  | RDR2-sensitive |
| CTACGACTAGTGTATTCATACGGT  | 16 | 0  | RDR2-resistant |
| CTACGATCCAGGGAGCTTCGGCAT  | 0  | 21 | RDR2-sensitive |
| CTACGCATCTGTGGAGCCAGGCTC  | 0  | 25 | RDR2-sensitive |

|                           |    |     |                |
|---------------------------|----|-----|----------------|
| CTACGCCAAAGGATCTCTGACGTC  | 0  | 10  | RDR2-sensitive |
| CTACGGACTCTTAGCACTGGCGGG  | 0  | 17  | RDR2-sensitive |
| CTACGGCAACGCTTGAACATCAA   | 1  | 22  | RDR2-sensitive |
| CTACGGCTCTGGGCTAGACGGTCT  | 1  | 30  | RDR2-sensitive |
| CTACGGTTTCGGTTGGGTGTCGGG  | 18 | 0   | RDR2-resistant |
| CTACGTAGAACTGGGTCGTACCGG  | 0  | 14  | RDR2-sensitive |
| CTACGTCCGTGCTGGCTGGCGGCT  | 0  | 9   | RDR2-sensitive |
| CTACGTGGACATAGGTTTAGGCAA  | 0  | 11  | RDR2-sensitive |
| CTACGTTGGCATGATACATTCGGC  | 0  | 18  | RDR2-sensitive |
| CTACTAACAACTACTCGTGGACCC  | 0  | 17  | RDR2-sensitive |
| CTACTAACTATTGTTGTCGGCACA  | 0  | 12  | RDR2-sensitive |
| CTACTACAGCTGTGGATGTGGGCA  | 0  | 10  | RDR2-sensitive |
| CTACTAGACTTTAGTACTGACGGT  | 0  | 9   | RDR2-sensitive |
| CTACTAGAGCTCTCGGCACAGGGA  | 0  | 11  | RDR2-sensitive |
| CTACTATATCAAGGACTATGGCGT  | 0  | 52  | RDR2-sensitive |
| CTACTCCTTGGACTACGGCGAACA  | 1  | 38  | RDR2-sensitive |
| CTACTCTGACAGCGGCGAGGCCGA  | 0  | 15  | RDR2-sensitive |
| CTACTCTGCGCAGGCGTGGACCGT  | 0  | 11  | RDR2-sensitive |
| CTACTCTGTAACCTATAAGACGAT  | 0  | 11  | RDR2-sensitive |
| CTACTCTGTGGTTATACTATGGCA  | 27 | 0   | RDR2-resistant |
| CTACTCTGTTGGATGGAAGATGCA  | 0  | 26  | RDR2-sensitive |
| CTACTCTTTGGACTGGCACGACGC  | 0  | 9   | RDR2-sensitive |
| CTACTGACCTCTAGAACCGATGGC  | 0  | 16  | RDR2-sensitive |
| CTACTGCAGAAGGACTTGAAGCAT  | 0  | 110 | RDR2-sensitive |
| CTACTGCGTCAAGGACTGCGGCGT  | 0  | 13  | RDR2-sensitive |
| CTACTGCTGACGGGAGGGAAGGGA  | 0  | 23  | RDR2-sensitive |
| CTACTGGACAATAGCGTGAGGTAT  | 0  | 21  | RDR2-sensitive |
| CTACTGGCCCATAGCACTGACGGT  | 0  | 12  | RDR2-sensitive |
| CTACTGGCCCCTAGCACTGACGGT  | 0  | 11  | RDR2-sensitive |
| CTACTGGCCTTTAACACTGACGGT  | 0  | 9   | RDR2-sensitive |
| CTACTGTACCTGTGGGCCCGTCTT  | 0  | 13  | RDR2-sensitive |
| CTACTGTAGACGGTCAGTGTGCGTA | 0  | 11  | RDR2-sensitive |
| CTACTGTAGCCCACGAGCCGGCCT  | 0  | 9   | RDR2-sensitive |
| CTACTGTAGTTCACGGGCCGGCCC  | 0  | 12  | RDR2-sensitive |
| CTACTGTCACGTAGGTACCGACGC  | 0  | 13  | RDR2-sensitive |
| CTACTGTCACTCTCTGCACGCGGT  | 0  | 18  | RDR2-sensitive |
| CTACTGTTTATTTTGTGGCATC    | 21 | 0   | RDR2-resistant |
| CTACTTCCTTGGGCTGTCTTCGGT  | 0  | 20  | RDR2-sensitive |
| CTACTTCGACTGGGCGGCGCTCAT  | 0  | 14  | RDR2-sensitive |
| CTACTTGGGCCTCCTGACGCGGTG  | 0  | 12  | RDR2-sensitive |
| CTACTTTTCGTTTGGTTCGTCTGT  | 0  | 17  | RDR2-sensitive |
| CTAGAAACCTGATTCGCCGGCACC  | 0  | 12  | RDR2-sensitive |
| CTAGAACCGAACAGCGAGAGGCCGC | 0  | 24  | RDR2-sensitive |
| CTAGAACCGAGAGCGACGATGCGT  | 0  | 32  | RDR2-sensitive |
| CTAGAACGACTGACGCCTGACGAG  | 0  | 31  | RDR2-sensitive |
| CTAGAACGGGCTCGACGAGAGGAA  | 0  | 9   | RDR2-sensitive |
| CTAGAAGACGAAGGGTTCCGGAGA  | 0  | 16  | RDR2-sensitive |
| CTAGAAGGTTGGCTTGGACGTCGT  | 0  | 13  | RDR2-sensitive |
| CTAGAATCAAGGATGGAACGGCTC  | 0  | 9   | RDR2-sensitive |

|                           |    |     |                |
|---------------------------|----|-----|----------------|
| CTAGAATCAGGAATGGAACGGCTC  | 0  | 32  | RDR2-sensitive |
| CTAGAATCAGGGATGGAACGGCTC  | 5  | 306 | RDR2-sensitive |
| CTAGAATCAGGGATGGAACGGCTT  | 0  | 12  | RDR2-sensitive |
| CTAGAATCAGGGATGGAGCGGCTC  | 0  | 20  | RDR2-sensitive |
| CTAGAATCGGGATGGAACGGCTC   | 0  | 9   | RDR2-sensitive |
| CTAGAATCTGGGATGGAACGGCTC  | 0  | 27  | RDR2-sensitive |
| CTAGACACGGACTGGTGACCGGGC  | 0  | 16  | RDR2-sensitive |
| CTAGACACTCCGACGCTTAGGCGA  | 0  | 9   | RDR2-sensitive |
| CTAGACCCTCTCTGAAGACGTCCG  | 0  | 15  | RDR2-sensitive |
| CTAGACCGAAGGACCTGCCGGCTT  | 0  | 13  | RDR2-sensitive |
| CTAGACTATCCGTCGGAGCGGCGC  | 0  | 10  | RDR2-sensitive |
| CTAGACTTACGCGTGATCGAGCT   | 0  | 9   | RDR2-sensitive |
| CTAGACTGAGACGGAGGACGAGAG  | 0  | 17  | RDR2-sensitive |
| CTAGACTGAGAGAGGAGGGAGGCC  | 0  | 13  | RDR2-sensitive |
| CTAGACTGTATGGCGTAGCGGCGC  | 0  | 42  | RDR2-sensitive |
| CTAGACTGTCACGGCACAAAGCGT  | 0  | 16  | RDR2-sensitive |
| CTAGACTGTGGACGCGGTGGGAGA  | 0  | 11  | RDR2-sensitive |
| CTAGACTTGAACCGGTAGTGTCTG  | 1  | 93  | RDR2-sensitive |
| CTAGAGCTCTCGGCACAGGGACTG  | 0  | 13  | RDR2-sensitive |
| CTAGAGGAGCTGTACCAAACGGGT  | 0  | 10  | RDR2-sensitive |
| CTAGATCACGGACCGTTCAGGCAG  | 0  | 15  | RDR2-sensitive |
| CTAGATCCTCGGAGCGCATGGCAG  | 1  | 13  | RDR2-sensitive |
| CTAGATCCTGCACCGGGAGAGGGC  | 0  | 14  | RDR2-sensitive |
| CTAGATCGGATGCACCAGATCGCT  | 0  | 13  | RDR2-sensitive |
| CTAGATCTACTGGACGACGAGCGC  | 0  | 13  | RDR2-sensitive |
| CTAGATCTGAGGGACTGACGGTTT  | 32 | 0   | RDR2-resistant |
| CTAGATGGCAGAACGGCAGAACAG  | 0  | 26  | RDR2-sensitive |
| CTAGATGTGGAGACTTGGAGACGT  | 0  | 31  | RDR2-sensitive |
| CTAGATTCTGGCCATAGCTCGGTT  | 0  | 12  | RDR2-sensitive |
| CTAGATTGGCTCGAGGCAGAACGG  | 0  | 21  | RDR2-sensitive |
| CTAGCACACTAGAACGGAGCTCAA  | 0  | 9   | RDR2-sensitive |
| CTAGCACGACTAGCAGGCTGACGG  | 0  | 17  | RDR2-sensitive |
| CTAGCACTATAGAATTGACGTGGC  | 0  | 14  | RDR2-sensitive |
| CTAGCACTGGCGGAACCTGAGAAAC | 0  | 123 | RDR2-sensitive |
| CTAGCACTGGCGGCACTGAAAAC   | 0  | 40  | RDR2-sensitive |
| CTAGCACTGGCGGCACTGAAAAGC  | 1  | 45  | RDR2-sensitive |
| CTAGCAGTCGGCGTAGTGTATGGC  | 0  | 9   | RDR2-sensitive |
| CTAGCCCCTGTGCCAGGTCGCGGA  | 0  | 12  | RDR2-sensitive |
| CTAGCCGCGCGTCGGAACCCGGTG  | 0  | 9   | RDR2-sensitive |
| CTAGCGAGCAGTTGTAGGCCCTG   | 1  | 19  | RDR2-sensitive |
| CTAGCGCATCGGACTGTTCCGGTG  | 0  | 10  | RDR2-sensitive |
| CTAGCGGACCTGAAGTAGAGAGAC  | 0  | 10  | RDR2-sensitive |
| CTAGCGGACGGCTGTGTTTGACGC  | 0  | 10  | RDR2-sensitive |
| CTAGCGGACGGCTGTGTTTGGCGC  | 0  | 20  | RDR2-sensitive |
| CTAGCGTGACAACGCCGTCGGAG   | 0  | 14  | RDR2-sensitive |
| CTAGCTCTGATAGCATGTTCCGTT  | 0  | 10  | RDR2-sensitive |
| CTAGCTGAACGTATGGATGGCTGT  | 0  | 9   | RDR2-sensitive |
| CTAGCTGGAGACGAAGCTCGGAAA  | 0  | 9   | RDR2-sensitive |
| CTAGCTGGGCCACGTAGACAGCAT  | 1  | 20  | RDR2-sensitive |

|                          |     |    |                |
|--------------------------|-----|----|----------------|
| CTAGCTGTGCTTGGGTCGGGTCGG | 0   | 17 | RDR2-sensitive |
| CTAGCTTGTGAGCGGACCGGTAT  | 0   | 27 | RDR2-sensitive |
| CTAGCTTGTGAGCGGATGGACGT  | 1   | 44 | RDR2-sensitive |
| CTAGCTTGTGAGCGGATTGACGT  | 1   | 31 | RDR2-sensitive |
| CTAGGACGACGACGATGACGACGT | 0   | 16 | RDR2-sensitive |
| CTAGGACTCGGTGCATTGGCAGTT | 16  | 0  | RDR2-resistant |
| CTAGGAGAGGACGCTACTGGAGAG | 0   | 9  | RDR2-sensitive |
| CTAGGAGCCTAGGACGACGGTGAC | 0   | 9  | RDR2-sensitive |
| CTAGGAGTTCTGGACCTGGAGCGT | 0   | 13 | RDR2-sensitive |
| CTAGGAGTTGTCTAGGCTCGGGCA | 3   | 32 | RDR2-sensitive |
| CTAGGATCTCTACTCCCCGACGGG | 0   | 11 | RDR2-sensitive |
| CTAGGATCTCCTCCCCGACGGG   | 0   | 9  | RDR2-sensitive |
| CTAGGATGAACCGCGCAGGACGT  | 0   | 11 | RDR2-sensitive |
| CTAGGATGCCGGACATGCACGCAT | 0   | 9  | RDR2-sensitive |
| CTAGGATGTGGCACGGTGGCCCAA | 0   | 9  | RDR2-sensitive |
| CTAGGATGTGGCACGGTGGCCCAG | 0   | 9  | RDR2-sensitive |
| CTAGGCACGGAGCTGGCACAACAC | 0   | 17 | RDR2-sensitive |
| CTAGGCACGGTAGAATAAGCGGGC | 0   | 16 | RDR2-sensitive |
| CTAGGCATTTTGCTTGTTAGTCGG | 4   | 25 | RDR2-sensitive |
| CTAGGCTCTCGGGAGATGGAGGAC | 57  | 2  | RDR2-resistant |
| CTAGGCTGAGAGAGGAGGGAGGCC | 0   | 10 | RDR2-sensitive |
| CTAGGCTGTAGCCCCGGTCACGGC | 1   | 81 | RDR2-sensitive |
| CTAGGCTGTGAGAGTAGGGAGACC | 0   | 28 | RDR2-sensitive |
| CTAGGCTGTGAGCCAGTGCTGCGG | 0   | 22 | RDR2-sensitive |
| CTAGGCTGTGCGCGTGCAAATCGA | 0   | 10 | RDR2-sensitive |
| CTAGGGAAGTGGATTACACGGCTT | 0   | 11 | RDR2-sensitive |
| CTAGGGCATGGCAGATGATGACGA | 0   | 11 | RDR2-sensitive |
| CTAGGGCTCAGCACGGTTCGTCGT | 0   | 14 | RDR2-sensitive |
| CTAGGGCTGACCTGGCATCGACGT | 0   | 22 | RDR2-sensitive |
| CTAGGGGCCAGTGGAAATCAGCAT | 0   | 11 | RDR2-sensitive |
| CTAGGGGCCAGTGGAAATCGTCAT | 0   | 11 | RDR2-sensitive |
| CTAGGGGTCAGTGGAAATCAGCAT | 3   | 79 | RDR2-sensitive |
| CTAGGGGTTGTCTAGGCTCGGGCC | 0   | 10 | RDR2-sensitive |
| CTAGGGTGGACTGCAGCAGCCGGC | 0   | 12 | RDR2-sensitive |
| CTAGGTAGGCTTGGACATTGGCAC | 0   | 11 | RDR2-sensitive |
| CTAGGTCGTGGACTGTCCGGCCAA | 1   | 34 | RDR2-sensitive |
| CTAGGTCGTGTGAAGAAGACGA   | 0   | 11 | RDR2-sensitive |
| CTAGGTGACCTACTGATCTCGGAG | 0   | 28 | RDR2-sensitive |
| CTAGTAACTGTTTTTTCCTTGGCT | 140 | 8  | RDR2-resistant |
| CTAGTATTGTAGAAGCTTCGGCTC | 0   | 20 | RDR2-sensitive |
| CTAGTCAGGACGCGGTCAACCCAG | 0   | 26 | RDR2-sensitive |
| CTAGTCATCGGACCATGCCGGCAC | 0   | 9  | RDR2-sensitive |
| CTAGTCATGGGCTGGGCCAGGCAA | 0   | 15 | RDR2-sensitive |
| CTAGTCCGGTATGTAGGGGTGGAT | 0   | 9  | RDR2-sensitive |
| CTAGTCGGCAGGAAGATCAGAGGC | 0   | 11 | RDR2-sensitive |
| CTAGTCGGTGTAGACGTGCGGTAG | 0   | 14 | RDR2-sensitive |
| CTAGTCGTTGGACCCAGACGGTCT | 0   | 15 | RDR2-sensitive |
| CTAGTCGTTTTGGTAGAGCGGTAA | 0   | 34 | RDR2-sensitive |
| CTAGTGGGCTGGGCTAGATTTGGC | 0   | 46 | RDR2-sensitive |



|                           |    |     |                |
|---------------------------|----|-----|----------------|
| CTAGTGTGGTATCTGATTACGGTT  | 0  | 14  | RDR2-sensitive |
| CTAGTTAGGGTTATGTGGGCAAAT  | 0  | 9   | RDR2-sensitive |
| CTAGTTCGGTTCTCGGTTCTTCGG  | 2  | 14  | RDR2-sensitive |
| CTAGTTGAAGAAGGTTATGATGAT  | 80 | 6   | RDR2-resistant |
| CTAGTTTGACTGGTTAGAATGGCT  | 0  | 9   | RDR2-sensitive |
| CTAGTTTGTCTGAACGGATTGGCAT | 0  | 24  | RDR2-sensitive |
| CTATAAGTCTGTAGTGTAGACGTC  | 0  | 21  | RDR2-sensitive |
| CTATAATTTGTGGATCCGATGACA  | 0  | 19  | RDR2-sensitive |
| CTATACACGTGTGGACCGTCTGAC  | 1  | 25  | RDR2-sensitive |
| CTATACCACGGACTCACTTGGCAG  | 0  | 31  | RDR2-sensitive |
| CTATACCAGCGTTTGATCGTCGTC  | 2  | 19  | RDR2-sensitive |
| CTATACTACTAGGTTGTTCCGGGCC | 0  | 14  | RDR2-sensitive |
| CTATAGACGGCTGCTGACGGTCCT  | 1  | 13  | RDR2-sensitive |
| CTATAGCAGGTCGGCTCGGACAGT  | 0  | 11  | RDR2-sensitive |
| CTATAGCTACTCTGATTTAGACGT  | 0  | 10  | RDR2-sensitive |
| CTATAGGCTATAGCGCAGAGACGT  | 0  | 10  | RDR2-sensitive |
| CTATAGGGCAGTAGCTGAGAGCAT  | 0  | 9   | RDR2-sensitive |
| CTATATACTGGAACGGAACGGCTT  | 0  | 32  | RDR2-sensitive |
| CTATATCAAGGACTATGACGTCAT  | 0  | 9   | RDR2-sensitive |
| CTATATCAAGGACTATGGCGTCAT  | 2  | 27  | RDR2-sensitive |
| CTATATCAAGGACTGTGGCGTCAT  | 0  | 61  | RDR2-sensitive |
| CTATATCATGGACTGTGACGTCAT  | 1  | 56  | RDR2-sensitive |
| CTATATCATGGACTGTGGCGTCAT  | 0  | 38  | RDR2-sensitive |
| CTATATCGAGAACTGTGGCGTCAT  | 0  | 9   | RDR2-sensitive |
| CTATATCGAGGACTGTGGCGTCAT  | 1  | 98  | RDR2-sensitive |
| CTATATCGAGGATTGTGGCGTCAT  | 4  | 36  | RDR2-sensitive |
| CTATATTCATGTCGTA CTGGACGG | 0  | 13  | RDR2-sensitive |
| CTATATTGGACTGGGCCACGGCCT  | 0  | 12  | RDR2-sensitive |
| CTATCATACTGGGATCGTAGCGT   | 0  | 11  | RDR2-sensitive |
| CTATCCCTGATTGTAGAAACGGAG  | 0  | 12  | RDR2-sensitive |
| CTATCGAGCAACTCTGCGAGACGG  | 0  | 9   | RDR2-sensitive |
| CTATCGCGTAGGACAGTTCGGCAA  | 5  | 121 | RDR2-sensitive |
| CTATCGCGTAGGACAGTTCGGCTA  | 0  | 50  | RDR2-sensitive |
| CTATCGCGTAGGACAGTTCGGCTT  | 0  | 13  | RDR2-sensitive |
| CTATCGCGTAGGACAGTTTGCAA   | 1  | 23  | RDR2-sensitive |
| CTATCGGACGCTGTATCAGGCATA  | 0  | 11  | RDR2-sensitive |
| CTATCGGACTAGGCCAGAGTGCAC  | 0  | 11  | RDR2-sensitive |
| CTATCGGGCACTCAGCGAAGACGT  | 0  | 62  | RDR2-sensitive |
| CTATCGGGCACTGTATGAGGCATA  | 0  | 12  | RDR2-sensitive |
| CTATCGGGTGACGGATATGGATAG  | 0  | 10  | RDR2-sensitive |
| CTATCGTCAGATCGGATCGGTCAG  | 0  | 11  | RDR2-sensitive |
| CTATCGTGTAGGACAGCTCGGCAA  | 0  | 10  | RDR2-sensitive |
| CTATCGTGTGGGCTTAGGTGGTT   | 0  | 15  | RDR2-sensitive |
| CTATCGTGTGTGCTGGGATGGTT   | 0  | 14  | RDR2-sensitive |
| CTATCTCCGACGACTGGTGAGGTT  | 0  | 12  | RDR2-sensitive |
| CTATCTGACCTGGGCTGACGACTG  | 0  | 9   | RDR2-sensitive |
| CTATCTGATCCCGGACCACAGCGG  | 0  | 19  | RDR2-sensitive |
| CTATCTGTGAAGGGCTGAAGGCGT  | 0  | 21  | RDR2-sensitive |
| CTATCTTACTGTAGTTAGACGCGT  | 0  | 9   | RDR2-sensitive |

|                            |    |     |                |
|----------------------------|----|-----|----------------|
| CTATGACACTGAGCTGGACGGTCT   | 1  | 70  | RDR2-sensitive |
| CTATGACATGTGGAGCCAGTGGCA   | 0  | 9   | RDR2-sensitive |
| CTATGACATGTGGGACCAGTGGCA   | 0  | 28  | RDR2-sensitive |
| CTATGACATGTGGGGCCAGTGGCA   | 0  | 64  | RDR2-sensitive |
| CTATGACTGGTGGGACCGTCTGTG   | 0  | 46  | RDR2-sensitive |
| CTATGAGCCCCGGACTGCGGCGC    | 0  | 15  | RDR2-sensitive |
| CTATGAGCCTGTAGGACCGCGACA   | 0  | 10  | RDR2-sensitive |
| CTATGATTTATGGATTCCGATGGCA  | 1  | 14  | RDR2-sensitive |
| CTATGATTTGTGAACCGATGGCAT   | 0  | 16  | RDR2-sensitive |
| CTATGATTTGTGGATCCGATGGCA   | 0  | 22  | RDR2-sensitive |
| CTATGATTTGTGGGCCCGATGGCA   | 0  | 19  | RDR2-sensitive |
| CTATGATTTGTGGGTCCGATGACA   | 0  | 38  | RDR2-sensitive |
| CTATGATTTGTGGGTCCGATGGCA   | 0  | 248 | RDR2-sensitive |
| CTATGCGAGACTGGACCGGCCCGA   | 0  | 14  | RDR2-sensitive |
| CTATGCTGAAGCTCCCTGGATCGT   | 0  | 9   | RDR2-sensitive |
| CTATGGAGCTGCCACGTCGGCAA    | 0  | 11  | RDR2-sensitive |
| CTATGGATGGCAGAACGGCAGAAC   | 0  | 13  | RDR2-sensitive |
| CTATGGATGGTGGAGGAAGTGCAG   | 1  | 14  | RDR2-sensitive |
| CTATGTAAGTCGGCATATGTCCAT   | 0  | 9   | RDR2-sensitive |
| CTATGTCCGACGGCATCGTAGACA   | 0  | 11  | RDR2-sensitive |
| CTATGTCCTAGATATTGTGTCGTCGT | 0  | 12  | RDR2-sensitive |
| CTATGTCGTGGGTCCGTGTCCGGTC  | 0  | 10  | RDR2-sensitive |
| CTATGTTAGAACTCCGGCCGAGGAG  | 27 | 0   | RDR2-resistant |
| CTATGTTTCGATCGGGCCAGGCCA   | 0  | 15  | RDR2-sensitive |
| CTATGTTTGACGGCTGCCTTGAG    | 0  | 10  | RDR2-sensitive |
| CTATTAACGGGGCCGTGCTTCGGA   | 0  | 10  | RDR2-sensitive |
| CTATTAAGACTGTAAGGGGTAGGC   | 0  | 9   | RDR2-sensitive |
| CTATTCGCTGTAGATGGGCCGCGA   | 0  | 10  | RDR2-sensitive |
| CTATTCGGGTTCCGGTTCGGGTTCG  | 0  | 9   | RDR2-sensitive |
| CTATTCGTACCGGGCCGAAACGGG   | 0  | 17  | RDR2-sensitive |
| CTATTGAGCCTGGCCGTAGGAGGA   | 0  | 9   | RDR2-sensitive |
| CTATTGCACTGTAATTGATGGCGA   | 0  | 15  | RDR2-sensitive |
| CTATTGGGGGACGCATAGGAACAG   | 0  | 16  | RDR2-sensitive |
| CTATTGTTGGAGGCAGCCTTAGAC   | 0  | 11  | RDR2-sensitive |
| CTATTGTTGGTCTGTGATGATGGT   | 0  | 9   | RDR2-sensitive |
| CTATTTGTGCAGGGCTGTGCCGGT   | 0  | 10  | RDR2-sensitive |
| CTATTTTCGGCGGCTGTGTCAGGC   | 0  | 12  | RDR2-sensitive |
| CTATTTTTTTGAGACGGTATGGAC   | 0  | 11  | RDR2-sensitive |
| CTCAAAACCCGGGCTGTGAGAGGA   | 3  | 37  | RDR2-sensitive |
| CTCAACGAAGAAGGCTCGGCACAC   | 0  | 11  | RDR2-sensitive |
| CTCAACGAGCTGTAGAAAGAGGTT   | 0  | 12  | RDR2-sensitive |
| CTCAACGTCGATCGGCTCGGCCAG   | 0  | 9   | RDR2-sensitive |
| CTCAAGGGCACTGTACGAGGGTAT   | 0  | 26  | RDR2-sensitive |
| CTCAAGGGCACTGTACGGAGGTAT   | 0  | 9   | RDR2-sensitive |
| CTCAAGGGCACTGTACGGGGGTAT   | 0  | 10  | RDR2-sensitive |
| CTCAATATTTGGTTGTAACGTCGT   | 17 | 1   | RDR2-resistant |
| CTCAATGAATCAGGAATTGTCCGT   | 0  | 17  | RDR2-sensitive |
| CTCAATGGTTCGTGCGGGACGCAC   | 0  | 13  | RDR2-sensitive |
| CTCAATGGTTCGTGCTGGACGCAC   | 0  | 11  | RDR2-sensitive |

|                            |     |    |                |
|----------------------------|-----|----|----------------|
| CTCAATTATAATTCTCGGACGCGC   | 0   | 15 | RDR2-sensitive |
| CTCACACTGCAGAGGCTTGGACGG   | 0   | 14 | RDR2-sensitive |
| CTCACATAGACCTGAACGAGCGGT   | 0   | 16 | RDR2-sensitive |
| CTCACCGTATGACACTGGAGGCAT   | 0   | 18 | RDR2-sensitive |
| CTCACGCTCGGGGATGGCTCAGAC   | 25  | 0  | RDR2-resistant |
| CTCACGGGCACTGTGCGGGGGTAT   | 2   | 15 | RDR2-sensitive |
| CTCACGGGTACTGTACTGGGGTAT   | 0   | 11 | RDR2-sensitive |
| CTCACGTAGATCTGAATGTATGGC   | 0   | 14 | RDR2-sensitive |
| CTCACGTGCACTGTTCAGAGGGCC   | 0   | 29 | RDR2-sensitive |
| CTCACTAGTGTGTGGTCCGGTTCGAT | 0   | 9  | RDR2-sensitive |
| CTCACTGAGTCGGCTGTGGATGGC   | 0   | 15 | RDR2-sensitive |
| CTCACTGGTCTGTGGATGCGGAGT   | 0   | 14 | RDR2-sensitive |
| CTCACTTCTTCGGTCTTCGGTCAT   | 0   | 11 | RDR2-sensitive |
| CTCAGACTGTATGACTAAGGGCAT   | 0   | 10 | RDR2-sensitive |
| CTCAGAGTCGTTGGTGCTTGCATA   | 14  | 0  | RDR2-resistant |
| CTCAGCAATCCACCTGGTCGTCGT   | 0   | 9  | RDR2-sensitive |
| CTCAGCAGGCTGTAAGGTGTTCCA   | 0   | 10 | RDR2-sensitive |
| CTCAGCCTGGACCAGTTGAACGGA   | 1   | 45 | RDR2-sensitive |
| CTCAGCCTGGACCAGTTGAACGGG   | 0   | 9  | RDR2-sensitive |
| CTCAGCCTGGCTCCACAGAAACGA   | 0   | 9  | RDR2-sensitive |
| CTCAGCCTGGCTCGCTAGAAACGG   | 0   | 9  | RDR2-sensitive |
| CTCAGCGAACTGTACATCGGCAAC   | 0   | 35 | RDR2-sensitive |
| CTCAGCTGGACCGGATACTACGCA   | 0   | 10 | RDR2-sensitive |
| CTCAGCTGGACGCAGGGGAGATGG   | 0   | 10 | RDR2-sensitive |
| CTCAGGACCCTGACGACAAACGGC   | 0   | 12 | RDR2-sensitive |
| CTCAGGATCTAGAAAGTGACGGAT   | 0   | 33 | RDR2-sensitive |
| CTCAGGCCATAGGATCGGACACCT   | 0   | 23 | RDR2-sensitive |
| CTCAGGCCATAGGATTGGGCACCT   | 0   | 9  | RDR2-sensitive |
| CTCAGGCTAGACCAGTTGAACGGC   | 0   | 10 | RDR2-sensitive |
| CTCAGGCTATGGACGCAGGGGCTT   | 0   | 13 | RDR2-sensitive |
| CTCAGTACTAGAACAGAGCGGTTT   | 0   | 11 | RDR2-sensitive |
| CTCAGTCGTGTAGAAGGAGGGCGT   | 0   | 31 | RDR2-sensitive |
| CTCAGTGGATCGTGGCAGCAAGGC   | 46  | 1  | RDR2-resistant |
| CTCATAATATTTTAGCAAGTCGGC   | 18  | 1  | RDR2-resistant |
| CTCATCCCATGGACGACGTAGCAT   | 0   | 12 | RDR2-sensitive |
| CTCATCCTTCCACCGCGGCCGCA    | 0   | 10 | RDR2-sensitive |
| CTCATCGTTTGGAGCGGCTTCTAG   | 0   | 11 | RDR2-sensitive |
| CTCATCTCAGGACTTAGGGCGGGT   | 0   | 11 | RDR2-sensitive |
| CTCATCTGTGTACGTCCGGACGGT   | 0   | 11 | RDR2-sensitive |
| CTCATCTTAGGACTTAGGGCGGGT   | 0   | 33 | RDR2-sensitive |
| CTCATCTTAGGATTTAGAGCGGGT   | 0   | 9  | RDR2-sensitive |
| CTCATCTTAGGATTTAGGACGGGT   | 0   | 16 | RDR2-sensitive |
| CTCATCTTAGGATTTAGGGCGGGT   | 1   | 23 | RDR2-sensitive |
| CTCATGTCGCATCGCACGGACACT   | 0   | 22 | RDR2-sensitive |
| CTCATGTCTGTTGGATGGTTTGAT   | 29  | 0  | RDR2-resistant |
| CTCATTGGAGGGTGAGGACAACA    | 0   | 11 | RDR2-sensitive |
| CTCATTGTCAAGCTTGGAGGCGTC   | 29  | 4  | RDR2-resistant |
| CTCATTGTCGAGCTTAGAGGCGTC   | 43  | 4  | RDR2-resistant |
| CTCATTGTCGAGCTTGGAGGCGTC   | 111 | 24 | RDR2-resistant |

|                            |    |     |                |
|----------------------------|----|-----|----------------|
| CTCCAAACCCTAGCGTCGGCGGCT   | 0  | 10  | RDR2-sensitive |
| CTCCAAAGACTGGCACATGACGAG   | 0  | 15  | RDR2-sensitive |
| CTCCAACGAGGACTAGGCAAGCAT   | 0  | 16  | RDR2-sensitive |
| CTCCAACGGTCAGAACCCAACGGC   | 0  | 10  | RDR2-sensitive |
| CTCCAAGAACCAAGCGACGGACGA   | 0  | 12  | RDR2-sensitive |
| CTCCACATTTAGGGTCTCTGGCAC   | 0  | 11  | RDR2-sensitive |
| CTCCACGGAGCGTGGTCGGTCGGA   | 0  | 9   | RDR2-sensitive |
| CTCCACGGATGAAAAGGGGACGCA   | 2  | 56  | RDR2-sensitive |
| CTCCACTCTGAAGGACGACGTCAT   | 1  | 12  | RDR2-sensitive |
| CTCCAGCAGCGTCTCTAAACGGT    | 0  | 13  | RDR2-sensitive |
| CTCCAGCCAGGAGATCGATCGGGT   | 0  | 48  | RDR2-sensitive |
| CTCCAGGACAGATCTAGACGACGT   | 0  | 9   | RDR2-sensitive |
| CTCCAGGACTCGCCGCTGAAGAGG   | 16 | 0   | RDR2-resistant |
| CTCCAGGAGGAGGATAGGACGGAG   | 16 | 0   | RDR2-resistant |
| CTCCAGGTTGGACTGTGCGGTTGC   | 0  | 20  | RDR2-sensitive |
| CTCCAGTAGTTCTCTAAGCAGTAG   | 0  | 13  | RDR2-sensitive |
| CTCCATGACGACGACGGCTCTCAG   | 0  | 10  | RDR2-sensitive |
| CTCCCCACAGCTAGATTCTCGGAA   | 0  | 16  | RDR2-sensitive |
| CTCCCCACGTCAGAGGATCTCGTT   | 0  | 17  | RDR2-sensitive |
| CTCCCCGTATTCGTCCGACACCAG   | 1  | 14  | RDR2-sensitive |
| CTCCCCGCGAGCGGGCTGCGAGGGC  | 38 | 0   | RDR2-resistant |
| CTCCCCGGGAGCGAGATCCAGGCGC  | 1  | 13  | RDR2-sensitive |
| CTCCCCGGTGCAGGATCTAGAAGAC  | 0  | 16  | RDR2-sensitive |
| CTCCCCGGTGTAGGATCTAGAAGAC  | 0  | 11  | RDR2-sensitive |
| CTCCCCGTC AACAGTAGAGGCGCAA | 0  | 22  | RDR2-sensitive |
| CTCCCCGTCAGCAGTAGAGACGCAA  | 3  | 141 | RDR2-sensitive |
| CTCCCCGTCAGCAGTAGAGGCACAA  | 0  | 45  | RDR2-sensitive |
| CTCCCCGTCAGCAGTAGAGGCGAAA  | 0  | 9   | RDR2-sensitive |
| CTCCCCGTCAGCAGTAGAGGCGCAA  | 17 | 953 | RDR2-sensitive |
| CTCCCCGTCAGCAGTAGAGGCGCAC  | 0  | 22  | RDR2-sensitive |
| CTCCCCGTCAGCAGTAGAGGCGCAT  | 1  | 27  | RDR2-sensitive |
| CTCCCCGTCAGCAGTAGAGGCGCCA  | 0  | 17  | RDR2-sensitive |
| CTCCCCGTCAGCAGTAGAGGCGCGA  | 1  | 118 | RDR2-sensitive |
| CTCCCCGTCAGCAGTAGAGGCGTAA  | 0  | 24  | RDR2-sensitive |
| CTCCCCGTCAGCAGTAGAGGTGCAA  | 2  | 16  | RDR2-sensitive |
| CTCCCCGTCAGCAGTAGATGCGCAA  | 0  | 13  | RDR2-sensitive |
| CTCCCCGTCAGTAGTAGAGGCGCAA  | 1  | 20  | RDR2-sensitive |
| CTCCCCGTTAGCAGTAGAGGCGCAA  | 0  | 12  | RDR2-sensitive |
| CTCCCTCATCGTCAGGGCGGCGTC   | 0  | 18  | RDR2-sensitive |
| CTCCCTCGGCGTGACGACGGATGC   | 0  | 9   | RDR2-sensitive |
| CTCCCTGACGGCACTCTAGTTGAA   | 76 | 24  | RDR2-resistant |
| CTCCCTGGAAGGACTCAGTCGGGA   | 0  | 9   | RDR2-sensitive |
| CTCCCTGGATTGTAGCTTCGGCAT   | 0  | 16  | RDR2-sensitive |
| CTCCCTGGATTGTAGCTTCGGTAT   | 0  | 13  | RDR2-sensitive |
| CTCCCTGTATCGAGCCGGACGGTT   | 0  | 17  | RDR2-sensitive |
| CTCCCTTATGAAACAGCTGGGCAT   | 2  | 54  | RDR2-sensitive |
| CTCCGACCTGTAGCGAGATGGGAC   | 0  | 27  | RDR2-sensitive |
| CTCCGAGGCGACTGTTGGAGGCGA   | 0  | 15  | RDR2-sensitive |
| CTCCGATATATAGAGGGTCGGCGT   | 0  | 14  | RDR2-sensitive |

|                           |    |    |                |
|---------------------------|----|----|----------------|
| CTCCGCACTCTGACACATCGGCAC  | 0  | 9  | RDR2-sensitive |
| CTCCGCCTGGCTCCCTGGAAACGG  | 0  | 10 | RDR2-sensitive |
| CTCCGCTATAATTCACCGGACTGT  | 0  | 34 | RDR2-sensitive |
| CTCCGACTGGACCAGGCAACCAA   | 1  | 21 | RDR2-sensitive |
| CTCCGGGTCCTGTTTTATAGACGT  | 0  | 24 | RDR2-sensitive |
| CTCCGGTGATCTCTGCCACGGCAC  | 0  | 27 | RDR2-sensitive |
| CTCCGTAAGGACCTGTTTCGTTGGA | 0  | 10 | RDR2-sensitive |
| CTCCGTCGTTTACTGTATCGTGCA  | 1  | 15 | RDR2-sensitive |
| CTCCGTCTGAAGGTGTCCGGTCAT  | 0  | 10 | RDR2-sensitive |
| CTCCGTCTTACACTGTCTCGTGCA  | 0  | 10 | RDR2-sensitive |
| CTCCGTGCTCGGCTCGCCACGGC   | 0  | 11 | RDR2-sensitive |
| CTCCGTGTGGGCTTCTGACGGATA  | 0  | 14 | RDR2-sensitive |
| CTCCGTTGGACCAACGACTACGGC  | 0  | 9  | RDR2-sensitive |
| CTCCGTTGGATTGGTGGTATAGAC  | 0  | 19 | RDR2-sensitive |
| CTCCGTTGGTGCAGCGAGACTGGC  | 0  | 9  | RDR2-sensitive |
| CTCCGTTGTAGAATATTTGTCGGT  | 0  | 17 | RDR2-sensitive |
| CTCCGTTTACTGTAGTGCACGGCC  | 0  | 30 | RDR2-sensitive |
| CTCCGTTTACTGTAGTGGAGGGCA  | 0  | 9  | RDR2-sensitive |
| CTCCGTTTTGGTTCGTCGGTCCGAT | 0  | 9  | RDR2-sensitive |
| CTCCTACACTGTGCAGACTAAGGC  | 0  | 11 | RDR2-sensitive |
| CTCCTCACAGCTAGATTCTCGGAA  | 0  | 15 | RDR2-sensitive |
| CTCCTCATCGTAGGTGTTCGTCGCC | 72 | 6  | RDR2-resistant |
| CTCCTCATCTTCGGACCCGACGGC  | 0  | 9  | RDR2-sensitive |
| CTCCTCCCCGTATTCGTCGGACAC  | 0  | 11 | RDR2-sensitive |
| CTCCTCCGTTGGATTGGTGGTATA  | 0  | 51 | RDR2-sensitive |
| CTCCTCGGTATGTATGTGGGCTAA  | 0  | 12 | RDR2-sensitive |
| CTCCTCGTCAGACGTAGGGAGGTG  | 0  | 12 | RDR2-sensitive |
| CTCCTCTGCACACTTCCGGACGGT  | 1  | 23 | RDR2-sensitive |
| CTCCTCTGCACACTTCTGGACGGT  | 0  | 13 | RDR2-sensitive |
| CTCCTCTGCACGCTTCCGGACGGT  | 0  | 11 | RDR2-sensitive |
| CTCCTCTGCACGCTTTCGGACGGT  | 2  | 18 | RDR2-sensitive |
| CTCCTCTGCATACGTCCGGACGGT  | 0  | 9  | RDR2-sensitive |
| CTCCTCTGCATACGTCCGGATGGT  | 0  | 14 | RDR2-sensitive |
| CTCCTCTGCATACTTCCGGACGGT  | 0  | 25 | RDR2-sensitive |
| CTCCTCTGCGTACATCCGGACGGT  | 0  | 17 | RDR2-sensitive |
| CTCCTCTGCGTACGCTCCGGACGGT | 0  | 11 | RDR2-sensitive |
| CTCCTCTGCGTACGTCCGGACGGT  | 1  | 51 | RDR2-sensitive |
| CTCCTCTGCGTACTTCCGGACGGT  | 1  | 27 | RDR2-sensitive |
| CTCCTCTGGGTGACTCGGGCGGCT  | 0  | 12 | RDR2-sensitive |
| CTCCTCTGTGTACGTCCGGACGGT  | 0  | 11 | RDR2-sensitive |
| CTCCTGATCTGTGGGAGACTCGGT  | 0  | 15 | RDR2-sensitive |
| CTCCTGCACCAGGTCGCGGACCGT  | 0  | 17 | RDR2-sensitive |
| CTCCTGGGCACGGATAGGGGCATT  | 41 | 11 | RDR2-resistant |
| CTCCTGTCAGCAGTAGAGGCGCAA  | 0  | 14 | RDR2-sensitive |
| CTCCTTCCCTTGGTTCGTTCCGGAC | 0  | 9  | RDR2-sensitive |
| CTCCTTGCTGGTTGTTCTGACGGT  | 0  | 9  | RDR2-sensitive |
| CTCCTTGGACTACGACGAACACGG  | 0  | 9  | RDR2-sensitive |
| CTCCTTGGACTACGGCGAACACGG  | 0  | 54 | RDR2-sensitive |
| CTCCTTTCTGTGCGACTGCGGACGG | 0  | 9  | RDR2-sensitive |

|                          |     |     |                |
|--------------------------|-----|-----|----------------|
| CTCCTTTGTGTACATCCGGACTGT | 0   | 9   | RDR2-sensitive |
| CTCGAAAAAGCGGCTCGGCTCGGC | 0   | 14  | RDR2-sensitive |
| CTCGAACGGTCGCTGGAAGACGAA | 0   | 10  | RDR2-sensitive |
| CTCGAACTCAGAGCAGCTCGGCTT | 0   | 9   | RDR2-sensitive |
| CTCGAAGCACGACGGGTAGATGAT | 0   | 9   | RDR2-sensitive |
| CTCGAAGGAGCAGGAGAACGCCGA | 0   | 18  | RDR2-sensitive |
| CTCGAATCGGCTCGAGAGCATCGT | 0   | 14  | RDR2-sensitive |
| CTCGACACAGTTGGACATTGGCAA | 0   | 9   | RDR2-sensitive |
| CTCGACAGCAGACGCCATGGACGC | 0   | 14  | RDR2-sensitive |
| CTCGACCCATCTGGGCTGGGGCAC | 1   | 19  | RDR2-sensitive |
| CTCGACCTCGGAAGACGGACTCCG | 0   | 11  | RDR2-sensitive |
| CTCGACCTCGGCCTCGGAAGACAG | 0   | 11  | RDR2-sensitive |
| CTCGACGAACTCTCTGTAGCGTT  | 0   | 9   | RDR2-sensitive |
| CTCGACGAACTGTACATCGGCAAC | 1   | 32  | RDR2-sensitive |
| CTCGACGACTGGCAGAAGGACCGT | 0   | 60  | RDR2-sensitive |
| CTCGACGACTGTACAGATTGCGTC | 0   | 22  | RDR2-sensitive |
| CTCGACGAGCTGGGCAGAGCAGAG | 0   | 9   | RDR2-sensitive |
| CTCGACGCAAGGGCTGAACCAGAA | 0   | 14  | RDR2-sensitive |
| CTCGACGCGTCTGTGGAAGGGCGA | 0   | 12  | RDR2-sensitive |
| CTCGACGTCCGACAAAAAGGCAT  | 0   | 11  | RDR2-sensitive |
| CTCGACTCGGCTCGATAACGGCTC | 0   | 22  | RDR2-sensitive |
| CTCGACTCGTGGAACCGGCCGGT  | 0   | 13  | RDR2-sensitive |
| CTCGACTCGTGGATCCGATCGGCA | 0   | 30  | RDR2-sensitive |
| CTCGACTGAGTGGGGCGGAGACGC | 0   | 11  | RDR2-sensitive |
| CTCGACTGTCCAACCCGGTGGCAA | 0   | 66  | RDR2-sensitive |
| CTCGACTTAGCGCACGGACGACGC | 0   | 13  | RDR2-sensitive |
| CTCGAGAACTCTAAGAATGACGA  | 198 | 5   | RDR2-resistant |
| CTCGAGATTTATGAATGACTAGGA | 18  | 0   | RDR2-resistant |
| CTCGAGCAACGGGCAACGGATGAG | 20  | 1   | RDR2-resistant |
| CTCGAGCAAGGCAGAGTACGTCTG | 0   | 9   | RDR2-sensitive |
| CTCGAGCCAGAACCAGAACCAGAA | 0   | 10  | RDR2-sensitive |
| CTCGAGCTCGTAGGAAGACTAGGT | 0   | 9   | RDR2-sensitive |
| CTCGAGGACGACGCTGCGGACGGG | 0   | 13  | RDR2-sensitive |
| CTCGAGTAGGAGAGTGGACATCAT | 0   | 17  | RDR2-sensitive |
| CTCGAGTGTGGACACAGAGACGTC | 0   | 11  | RDR2-sensitive |
| CTCGATAACTCGCTCGACTCGGCT | 0   | 39  | RDR2-sensitive |
| CTCGATAGGACTACTCGAGTCGGC | 0   | 13  | RDR2-sensitive |
| CTCGATATAGTAGTCGTCGAACGC | 0   | 9   | RDR2-sensitive |
| CTCGATATTTGGTTGTAACGTCGT | 56  | 14  | RDR2-resistant |
| CTCGATCGTGTCTCTGCCCGGTA  | 0   | 9   | RDR2-sensitive |
| CTCGATCTATGGAGACGTGGACGG | 0   | 10  | RDR2-sensitive |
| CTCGATGGACGCGTGCAGGAGGCT | 0   | 9   | RDR2-sensitive |
| CTCGATTAGGACACGGCACGACAG | 0   | 23  | RDR2-sensitive |
| CTCGATTTGGGCCGTGTAGTGGGC | 0   | 9   | RDR2-sensitive |
| CTCGACAAAGGAACTATCGGCAA  | 0   | 100 | RDR2-sensitive |
| CTCGCACAGTAGACCGTAGACGGC | 0   | 10  | RDR2-sensitive |
| CTCGCAGCCTGCAGCAACGGACGG | 0   | 15  | RDR2-sensitive |
| CTCGCAGGAGAAGCCCCTGAGCAG | 1   | 14  | RDR2-sensitive |
| CTCGCAGTCCGGCTAATGTAGAT  | 0   | 13  | RDR2-sensitive |

|                           |    |     |                |
|---------------------------|----|-----|----------------|
| CTCGCATCTGAGACGAAGACGAGC  | 0  | 9   | RDR2-sensitive |
| CTCGCCGACTGTAATGGAGGGCAA  | 0  | 10  | RDR2-sensitive |
| CTCGCCGCTCTCAGGACTCGACGG  | 0  | 14  | RDR2-sensitive |
| CTCGCCGCTCTCGGGATTCGACGG  | 1  | 13  | RDR2-sensitive |
| CTCGCCGGCTGCAATGGAGGGCAA  | 2  | 21  | RDR2-sensitive |
| CTCGCCTCGTTGGGTTGCTCGGCA  | 0  | 11  | RDR2-sensitive |
| CTCGCCTGACGTCGGGCTCGGTGC  | 0  | 11  | RDR2-sensitive |
| CTCGCGCCCAGGAACCTCGTCGGAG | 0  | 11  | RDR2-sensitive |
| CTCGCGCCTCTACTGCTGACGGGA  | 0  | 17  | RDR2-sensitive |
| CTCGCGCGGGACGGTAGAGGGCCC  | 0  | 11  | RDR2-sensitive |
| CTCGCGGAGAGCTTGCAGGACGTC  | 0  | 10  | RDR2-sensitive |
| CTCGCGTGCGTAGGACGAGTTGGC  | 0  | 37  | RDR2-sensitive |
| CTCGCTACCTACTCTGGGCCGGAC  | 0  | 13  | RDR2-sensitive |
| CTCGCTCTGAGCTGCTGAGACGTT  | 0  | 19  | RDR2-sensitive |
| CTCGCTGACGCACGGAATGACGAC  | 0  | 13  | RDR2-sensitive |
| CTCGCTGGCGTGTATAGGACGGTC  | 0  | 15  | RDR2-sensitive |
| CTCGCTGTAGGAGCGGCTCTTCTC  | 0  | 17  | RDR2-sensitive |
| CTCGCTTAGAATCAGGAGCTGGAG  | 0  | 16  | RDR2-sensitive |
| CTCGGAAAACGGCTCGGCTCGGC   | 0  | 14  | RDR2-sensitive |
| CTCGGAAAAGAGGCTCGGCTCGGC  | 0  | 12  | RDR2-sensitive |
| CTCGGAACTAGCAGGTAGCAGAA   | 0  | 9   | RDR2-sensitive |
| CTCGGAAGACGGACTCCGCCTCGC  | 0  | 12  | RDR2-sensitive |
| CTCGGAAGACGGCGAACTCCGCTC  | 1  | 17  | RDR2-sensitive |
| CTCGGAAGACGGTCTCCGCCTCGC  | 1  | 18  | RDR2-sensitive |
| CTCGGAAGTTAGACTGCGGACCGG  | 0  | 11  | RDR2-sensitive |
| CTCGGACAAGAACTAGGCACGGT   | 0  | 27  | RDR2-sensitive |
| CTCGGACACTCGATACAGAGGCGT  | 0  | 10  | RDR2-sensitive |
| CTCGGACACTCGGCAAAGAGGTTT  | 0  | 21  | RDR2-sensitive |
| CTCGGACAGGAACTAGGCACGGT   | 0  | 77  | RDR2-sensitive |
| CTCGGACAGGAAATTAGGCACGGT  | 0  | 13  | RDR2-sensitive |
| CTCGGACGGCCTGACTGCGGATG   | 0  | 20  | RDR2-sensitive |
| CTCGGACGGTAGACGCAGTCACGT  | 0  | 9   | RDR2-sensitive |
| CTCGGACTAAAGTCGGCATTGCAG  | 0  | 9   | RDR2-sensitive |
| CTCGGACTACGGCACACTCATGAC  | 0  | 44  | RDR2-sensitive |
| CTCGGACTCGGCGAGGGCCTCGGC  | 36 | 8   | RDR2-resistant |
| CTCGGAGAAGACTGTGCACACCTC  | 0  | 9   | RDR2-sensitive |
| CTCGGAGGGCGTCGAACATGGTGT  | 20 | 0   | RDR2-resistant |
| CTCGGAGTGACCGACAGAACGCGG  | 0  | 18  | RDR2-sensitive |
| CTCGGATACAGGATCGGATACGGA  | 0  | 13  | RDR2-sensitive |
| CTCGGATACAGGTAGGATACGGAA  | 1  | 20  | RDR2-sensitive |
| CTCGGATACGGGTAGGATACGGAA  | 2  | 259 | RDR2-sensitive |
| CTCGGATACGGGTAGGATACGGCA  | 0  | 9   | RDR2-sensitive |
| CTCGGATCCTGCCAGCTCGTCGT   | 0  | 18  | RDR2-sensitive |
| CTCGGATCTGTGACGCACGGCCAT  | 0  | 14  | RDR2-sensitive |
| CTCGGATTCTACCCAGCTCGTCGT  | 0  | 35  | RDR2-sensitive |
| CTCGGATTTTACTGGCACGGCCCT  | 0  | 29  | RDR2-sensitive |
| CTCGGATTTTGTCCGCACGGCCAC  | 0  | 18  | RDR2-sensitive |
| CTCGGATTTTGTCCGCACGGCCCT  | 0  | 11  | RDR2-sensitive |
| CTCGGCAAACAGTACATCGGCAA   | 3  | 19  | RDR2-sensitive |

|                           |     |     |                |
|---------------------------|-----|-----|----------------|
| CTCGGCAAACGGGGCTCTCGGCAA  | 3   | 42  | RDR2-sensitive |
| CTCGGCAAAGAACCTAAGCCGGTG  | 0   | 12  | RDR2-sensitive |
| CTCGGCAAAGAACGCGATTCCGGT  | 3   | 96  | RDR2-sensitive |
| CTCGGCAAAGAACGCTCGGCGAAC  | 3   | 131 | RDR2-sensitive |
| CTCGGCAAAGAAGGCTCGGCAAAC  | 0   | 9   | RDR2-sensitive |
| CTCGGCAAAGACACAAGCACTCGG  | 0   | 9   | RDR2-sensitive |
| CTCGGCAAAGACGGCTCTCGGCAA  | 0   | 31  | RDR2-sensitive |
| CTCGGCAAAGACTGACGGCCGTCA  | 0   | 17  | RDR2-sensitive |
| CTCGGCAAAGATGGCGCTCGGCAA  | 1   | 17  | RDR2-sensitive |
| CTCGGCAAAGATGGCTCTCGGCAA  | 0   | 13  | RDR2-sensitive |
| CTCGGCAAAGCCTCGGATTCCGGT  | 1   | 29  | RDR2-sensitive |
| CTCGGCAAAGCCTTGGATTCCGGT  | 0   | 17  | RDR2-sensitive |
| CTCGGCAAAGGCTCGGATTCCGGT  | 0   | 10  | RDR2-sensitive |
| CTCGGCAAAGGGACTGGCAAAGGG  | 0   | 13  | RDR2-sensitive |
| CTCGGCAAAGGGGGCTCTCGGCAA  | 0   | 25  | RDR2-sensitive |
| CTCGGCAAAGTCTCGGATTCCGGT  | 2   | 18  | RDR2-sensitive |
| CTCGGCAAGCGTTCGGACGTTTCA  | 0   | 11  | RDR2-sensitive |
| CTCGGCACACCATGAAAGCGACGG  | 0   | 12  | RDR2-sensitive |
| CTCGGCACAGAACGGCACTCGGCA  | 2   | 15  | RDR2-sensitive |
| CTCGGCACAGCATACTCGGCAA    | 0   | 9   | RDR2-sensitive |
| CTCGGCACAGCCAAGCACTCGGCA  | 0   | 19  | RDR2-sensitive |
| CTCGGCACAGGAAAACACTCGGCA  | 1   | 18  | RDR2-sensitive |
| CTCGGCACAGGAATACACTCGGCA  | 0   | 15  | RDR2-sensitive |
| CTCGGCACAGGACAACACTCGGCA  | 0   | 9   | RDR2-sensitive |
| CTCGGCACAGGACCACACTCGGCA  | 0   | 12  | RDR2-sensitive |
| CTCGGCACAGGACGACACTCGGCA  | 0   | 20  | RDR2-sensitive |
| CTCGGCACAGGACGCACTCGGCAA  | 2   | 24  | RDR2-sensitive |
| CTCGGCACAGGTAGGCACTCGGCA  | 5   | 23  | RDR2-sensitive |
| CTCGGCACGGTAGAATAAGCGGGC  | 0   | 10  | RDR2-sensitive |
| CTCGGCAGCGGGCGTAGGAGCATA  | 0   | 16  | RDR2-sensitive |
| CTCGGCATAGAACGACACTCGGCA  | 0   | 9   | RDR2-sensitive |
| CTCGGCATAGGTAGACTCGGCA    | 0   | 10  | RDR2-sensitive |
| CTCGGCATAGTTAACGATCGGCCGT | 0   | 25  | RDR2-sensitive |
| CTCGGCATATAAGGACACTCGGCA  | 0   | 15  | RDR2-sensitive |
| CTCGGCATGTAGGTTGATCGGTAA  | 0   | 25  | RDR2-sensitive |
| CTCGGCCACGGAAGACAGACTCGA  | 1   | 21  | RDR2-sensitive |
| CTCGGCCAGGCTGACGTGGACTGC  | 0   | 15  | RDR2-sensitive |
| CTCGGCCAGGTTACGTAGACGAGC  | 0   | 16  | RDR2-sensitive |
| CTCGGCCCCGTAGACCAGGAAGAA  | 2   | 17  | RDR2-sensitive |
| CTCGGCCGAAGTGTACATCGGCAAC | 11  | 227 | RDR2-sensitive |
| CTCGGCCGAAGTGTACATCGGCTAT | 0   | 34  | RDR2-sensitive |
| CTCGGCCGAGCTGTTGAACACGGGC | 0   | 10  | RDR2-sensitive |
| CTCGGCCGAGGACTACTCGAGGAC  | 104 | 27  | RDR2-resistant |
| CTCGGCCGTAGATGATGTTGAGGCT | 13  | 96  | RDR2-sensitive |
| CTCGGCCGTAGTAGCGGATTTCCA  | 2   | 26  | RDR2-sensitive |
| CTCGGCCGTCTAACAGAAGAACAG  | 0   | 14  | RDR2-sensitive |
| CTCGGCCGTCTCAGCAGAAGAACAG | 0   | 12  | RDR2-sensitive |
| CTCGGCCGTCTCAGCGGAAGAACAG | 2   | 31  | RDR2-sensitive |
| CTCGGCTCCGGCAGCGGCTCTAGT  | 1   | 16  | RDR2-sensitive |



|                           |    |    |                |
|---------------------------|----|----|----------------|
| CTCGGCTCGCCACGGCACTGGAC   | 0  | 28 | RDR2-sensitive |
| CTCGGCTCGGTGAGGCTCGGTGGA  | 0  | 10 | RDR2-sensitive |
| CTCGGCTCGTTAGTAGATCGGCTC  | 0  | 17 | RDR2-sensitive |
| CTCGGCTCGTTCGAGGCTCGCGAG  | 0  | 16 | RDR2-sensitive |
| CTCGGCTCTCGCATCGATGAAGAA  | 35 | 2  | RDR2-resistant |
| CTCGGCTCTGCTGAAGGAGGATGT  | 0  | 9  | RDR2-sensitive |
| CTCGGCTGACGTAGAGACAGGCAA  | 0  | 19 | RDR2-sensitive |
| CTCGGCTGCCTAGACGACGGACGG  | 0  | 10 | RDR2-sensitive |
| CTCGGCTGCGACAATGGACAGAAG  | 0  | 15 | RDR2-sensitive |
| CTCGGCTGCTACGACGGGTGTGCA  | 0  | 10 | RDR2-sensitive |
| CTCGGCTGGCTGACGAAGAGACAG  | 0  | 37 | RDR2-sensitive |
| CTCGGCTGGCTGACGAAGAGACAT  | 0  | 11 | RDR2-sensitive |
| CTCGGCTTGCGGCGCACTTATGGC  | 0  | 13 | RDR2-sensitive |
| CTCGGCTTTAGTCCCACATCGGCT  | 0  | 17 | RDR2-sensitive |
| CTCGGGAACAACATGTAGCGGAT   | 0  | 15 | RDR2-sensitive |
| CTCGGGAACAGTTGGAAACGGAT   | 0  | 10 | RDR2-sensitive |
| CTCGGGCAAAAACAGTCGTCGCGG  | 0  | 9  | RDR2-sensitive |
| CTCGGGCACTCGACAAAGAGGTTT  | 0  | 11 | RDR2-sensitive |
| CTCGGGCACTCGGCAAAGAAAAGC  | 0  | 12 | RDR2-sensitive |
| CTCGGGCACTCGGCAAAGAGGTTT  | 0  | 77 | RDR2-sensitive |
| CTCGGGCACTCGGCAAAGTGGTTT  | 0  | 9  | RDR2-sensitive |
| CTCGGGCCGACGAGTGAGTGTGCGC | 0  | 9  | RDR2-sensitive |
| CTCGGGCGAGCCGAAGGTGTGTCC  | 0  | 9  | RDR2-sensitive |
| CTCGGGCGAGCCGGAGATGTGTCC  | 0  | 24 | RDR2-sensitive |
| CTCGGGCGAGCCGGTGTGTGTCC   | 0  | 12 | RDR2-sensitive |
| CTCGGGCTCCTGTTTGGATGAGGC  | 0  | 17 | RDR2-sensitive |
| CTCGGGCTCGCAGCAGGTCCGTTT  | 0  | 9  | RDR2-sensitive |
| CTCGGGCTGGCTCGCCAGAAACGA  | 0  | 13 | RDR2-sensitive |
| CTCGGGCTTGCTCGTCGTAGTCGG  | 1  | 80 | RDR2-sensitive |
| CTCGGGGAGGGTAGGGAATGACGG  | 0  | 11 | RDR2-sensitive |
| CTCGGGGCCTTGGAGATAGATGAC  | 0  | 10 | RDR2-sensitive |
| CTCGGGGTAGGGTGTATGATGGCGC | 14 | 48 | RDR2-sensitive |
| CTCGGGTAGCTAGATGCAAGACGT  | 0  | 11 | RDR2-sensitive |
| CTCGGGTCCACTAGAAGGCGACAT  | 0  | 11 | RDR2-sensitive |
| CTCGGGTCTGAGCTGCAGGGCACG  | 0  | 10 | RDR2-sensitive |
| CTCGGGTCTTGCTAGTGTGCGCT   | 0  | 14 | RDR2-sensitive |
| CTCGGGTCCCTGCCTGACGGCCG   | 0  | 13 | RDR2-sensitive |
| CTCGGGTTGAGAACAACAGGGGAC  | 0  | 12 | RDR2-sensitive |
| CTCGGGTTGTTCTGGGCACCGCAT  | 0  | 9  | RDR2-sensitive |
| CTCGGTAAGAGGGCTCGGCACAC   | 0  | 10 | RDR2-sensitive |
| CTCGGTAACGTGTGGAGCGGTCAC  | 0  | 12 | RDR2-sensitive |
| CTCGGTAATGAGGCTCGGCTCGGC  | 3  | 35 | RDR2-sensitive |
| CTCGGTACAGGGAAACACTCGGCA  | 0  | 15 | RDR2-sensitive |
| CTCGGTACAGGTCCACACTCGGCA  | 0  | 9  | RDR2-sensitive |
| CTCGGTACGGATAATGGATCGGCT  | 0  | 9  | RDR2-sensitive |
| CTCGGTAGGACCTGGTCAGCCGGT  | 0  | 14 | RDR2-sensitive |
| CTCGGTATAGAATGACACTCGGTT  | 0  | 12 | RDR2-sensitive |
| CTCGGTATGAACGGAAGGTGTCGT  | 0  | 9  | RDR2-sensitive |
| CTCGGTCAGACGGGAGACGTTGGA  | 0  | 9  | RDR2-sensitive |

|                           |    |    |                |
|---------------------------|----|----|----------------|
| CTCGGTCAGGAGAGAAGCCGTGCG  | 0  | 10 | RDR2-sensitive |
| CTCGGTCTAGATCCAAGCGCGGGC  | 89 | 10 | RDR2-resistant |
| CTCGGTCTCGCTGTGGGTCAGCAT  | 0  | 9  | RDR2-sensitive |
| CTCGGTCTGCGGCGCACTTATGGC  | 0  | 11 | RDR2-sensitive |
| CTCGGTCTGGCGGATGCAACAGGC  | 0  | 15 | RDR2-sensitive |
| CTCGGTCTTCGACGGTCATCTCAA  | 0  | 9  | RDR2-sensitive |
| CTCGGTGAACTGTACATTGGCAAC  | 0  | 14 | RDR2-sensitive |
| CTCGGTGACCGTAGGCGGGTGGCT  | 0  | 9  | RDR2-sensitive |
| CTCGGTGAGGCTCGGTGGAATAGC  | 0  | 10 | RDR2-sensitive |
| CTCGGTGATGACTTCAAGCAGCAT  | 18 | 0  | RDR2-resistant |
| CTCGGTGCCTGAACGAGCTCGGCT  | 0  | 11 | RDR2-sensitive |
| CTCGGTGGTTGATGGCTCCGGCAT  | 1  | 22 | RDR2-sensitive |
| CTCGGTGTAGCTCACGAGCTGGCT  | 0  | 9  | RDR2-sensitive |
| CTCGGTTCTCGTCTAGACGCGCGT  | 0  | 15 | RDR2-sensitive |
| CTCGGTTCTGCGGGAGACGATCGG  | 0  | 9  | RDR2-sensitive |
| CTCGGTTCTTGTAGAAATTCGGTT  | 1  | 88 | RDR2-sensitive |
| CTCGGTTGGGGACAGAACGGTCCG  | 0  | 10 | RDR2-sensitive |
| CTCGGTTTCTGTGCGCGGCTGTGT  | 0  | 14 | RDR2-sensitive |
| CTCGTACACAGCCGTCCGAGATAA  | 0  | 9  | RDR2-sensitive |
| CTCGTACAGAGCCGTCCGAGATAA  | 1  | 27 | RDR2-sensitive |
| CTCGTACAGTAGGAAGTGAGGCGT  | 0  | 15 | RDR2-sensitive |
| CTCGTACGTGTTAGCCTTCGGTAT  | 4  | 18 | RDR2-sensitive |
| CTCGTAGTACTATGGCACGACATA  | 0  | 9  | RDR2-sensitive |
| CTCGTAGTCCTCTAGGCAGATCGA  | 0  | 12 | RDR2-sensitive |
| CTCGTAGTGGCAGAACC GCGCAAC | 0  | 9  | RDR2-sensitive |
| CTCGTATCGTGCGTTGTTGTGGCG  | 67 | 2  | RDR2-resistant |
| CTCGTATTGCTGTTGCTCATCGGC  | 0  | 9  | RDR2-sensitive |
| CTCGTCAAAGCGCCGAGGACTCGG  | 0  | 9  | RDR2-sensitive |
| CTCGTCCATGCTGTCGGCCCGTAC  | 0  | 12 | RDR2-sensitive |
| CTCGTCCAAGGGCAGAGGCACCGA  | 0  | 9  | RDR2-sensitive |
| CTCGTCCACCCTGCTGATTCCGGC  | 2  | 16 | RDR2-sensitive |
| CTCGTCCGTGGTGTATGATAGGGCT | 0  | 13 | RDR2-sensitive |
| CTCGTGAGCCAGAGCCAAAGCCGT  | 0  | 14 | RDR2-sensitive |
| CTCGTGAGCCAGAGCTAAAGCCGT  | 0  | 16 | RDR2-sensitive |
| CTCGTGCAAGGTCTCGAACGGCAA  | 1  | 31 | RDR2-sensitive |
| CTCGTGCGACTGTCCGGTGAGGCC  | 0  | 9  | RDR2-sensitive |
| CTCGTGCTTGGACGAGGACACGGC  | 19 | 0  | RDR2-resistant |
| CTCGTGGACGACAGCGCGGCAGGT  | 0  | 12 | RDR2-sensitive |
| CTCGTGGCTCGCTGGCTCGCTCGG  | 0  | 30 | RDR2-sensitive |
| CTCGTGATACAGACTCAGCGGTG   | 0  | 14 | RDR2-sensitive |
| CTCGTGTCGGGCCAAGCCGGCTTG  | 0  | 9  | RDR2-sensitive |
| CTCGTTGACACTTTGGACGCCGGC  | 0  | 21 | RDR2-sensitive |
| CTCGTTGATCTGGAACCCAGGCAT  | 0  | 9  | RDR2-sensitive |
| CTCGTTGTGGGCTGCAAGCGGTCT  | 0  | 20 | RDR2-sensitive |
| CTCGTTTCTGTAGAGCCAGGCTGA  | 0  | 11 | RDR2-sensitive |
| CTCGTTTCTGTGGAGCCAGGCTGA  | 0  | 43 | RDR2-sensitive |
| CTCGTTTCTGTGGAGTCAGGCTGA  | 0  | 10 | RDR2-sensitive |
| CTCGTTTTGGGCTCCGGACGGTTT  | 0  | 10 | RDR2-sensitive |
| CTCGTTTTTGTGGAGCCAGGCTGA  | 0  | 15 | RDR2-sensitive |

|                          |    |    |                |
|--------------------------|----|----|----------------|
| CTCTAAACTCTGGGTGGAGCAGC  | 0  | 30 | RDR2-sensitive |
| CTCTAACCTTGTCGTGGACGCTGT | 0  | 17 | RDR2-sensitive |
| CTCTACATCGTTTGGAGACGCTTT | 0  | 10 | RDR2-sensitive |
| CTCTACATGTAGCGGCTGAAGCAG | 0  | 20 | RDR2-sensitive |
| CTCTACGTCGATTAGAGGAGTCTA | 2  | 23 | RDR2-sensitive |
| CTCTACTAACTATTGTTGTCGGCA | 0  | 13 | RDR2-sensitive |
| CTCTACTCCCTCCAGCAACGTCAT | 0  | 9  | RDR2-sensitive |
| CTCTACTGCTGACGGGAGGGAAGG | 1  | 32 | RDR2-sensitive |
| CTCTAGAACCGCCACTATAGAGGC | 0  | 9  | RDR2-sensitive |
| CTCTAGAGCGTATTGGACGGTTGA | 0  | 25 | RDR2-sensitive |
| CTCTAGGGCTGTGTGTTTTCGGTA | 0  | 23 | RDR2-sensitive |
| CTCTATACACGTGTGGACCGTCTG | 0  | 14 | RDR2-sensitive |
| CTCTATAGATTGCAGCTCCGGCAG | 0  | 9  | RDR2-sensitive |
| CTCTATCAGTCCGTCGGGCGGCAA | 0  | 11 | RDR2-sensitive |
| CTCTATCGTACACTGTTTCGCGCA | 0  | 10 | RDR2-sensitive |
| CTCTATCGTCTACTCTAAAGCAGA | 0  | 9  | RDR2-sensitive |
| CTCTATCTCTGTAGCGTTCGGCAT | 0  | 41 | RDR2-sensitive |
| CTCTATGGATTGCAGATGCAGCAG | 0  | 10 | RDR2-sensitive |
| CTCTATGGATTGCAGCTGCAGCAG | 0  | 33 | RDR2-sensitive |
| CTCTATGTCAGATGGAGCGCTCGG | 0  | 9  | RDR2-sensitive |
| CTCTATTGGGCGGGACCGAGCATG | 0  | 9  | RDR2-sensitive |
| CTCTCAGCAGGTACGACGGACATT | 0  | 36 | RDR2-sensitive |
| CTCTCCCGTCAGCAGTAGAGACGC | 0  | 12 | RDR2-sensitive |
| CTCTCCCGTCAGCAGTAGAGGCGC | 1  | 70 | RDR2-sensitive |
| CTCTCCCGTCAGCAGTAGAGGCGT | 1  | 12 | RDR2-sensitive |
| CTCTCCCGTCAGTAGTAGAGGCGC | 0  | 11 | RDR2-sensitive |
| CTCTCCGCGCGCTGTAGAAGGCAC | 3  | 62 | RDR2-sensitive |
| CTCTCGAGGTCGGCTGCCCTTGGC | 1  | 18 | RDR2-sensitive |
| CTCTCGAGGTCGGCTGCCTTCGGC | 12 | 32 | RDR2-sensitive |
| CTCTCGGACTACGGCACACTCATG | 0  | 16 | RDR2-sensitive |
| CTCTCGGACTCGGTCAAGGCCAGA | 0  | 10 | RDR2-sensitive |
| CTCTCGGCAAAGACTGACGGTCGT | 0  | 24 | RDR2-sensitive |
| CTCTCGGCAACGGATATCTCGGCT | 44 | 10 | RDR2-resistant |
| CTCTCGGCCAGCAGAACGATCGAT | 0  | 16 | RDR2-sensitive |
| CTCTCGGGAATTTGCTGACGGCGT | 0  | 14 | RDR2-sensitive |
| CTCTCGGTTTGGAGCTGCTCCGGC | 2  | 17 | RDR2-sensitive |
| CTCTCGTCAGCAGTAGAGGCGCAA | 0  | 32 | RDR2-sensitive |
| CTCTCGTCAGCAGTAGAGGCGTAA | 0  | 9  | RDR2-sensitive |
| CTCTCGTTCGCATGACTGGGCATG | 0  | 10 | RDR2-sensitive |
| CTCTCGTTTGGACTTCCGGCCGGG | 0  | 14 | RDR2-sensitive |
| CTCTCTAACCGCCTGAATCGTCGT | 0  | 9  | RDR2-sensitive |
| CTCTCTACCGGACACGTTAGCATA | 0  | 10 | RDR2-sensitive |
| CTCTCTACTAGAGCGTGGACGGAT | 0  | 9  | RDR2-sensitive |
| CTCTCTATGGATTGCAGCTGCAGC | 0  | 46 | RDR2-sensitive |
| CTCTCTCGGACTCGGTCAAGGCCA | 0  | 22 | RDR2-sensitive |
| CTCTCTCGTCAGCAGTAGAGGCGT | 1  | 75 | RDR2-sensitive |
| CTCTCTCGTCAGCAGTAGAGGTGT | 2  | 31 | RDR2-sensitive |
| CTCTCTCGTCGACCTCTTGCAGAA | 0  | 14 | RDR2-sensitive |
| CTCTCTCGTTTGGACTTCCGGCCG | 0  | 44 | RDR2-sensitive |

|                           |    |     |                |
|---------------------------|----|-----|----------------|
| CTCTCTCTCGGACTCGGTCAAGGC  | 0  | 34  | RDR2-sensitive |
| CTCTCTCTGCAGGATGACTCTCAT  | 49 | 2   | RDR2-resistant |
| CTCTCTGATCAGGCACGGACGGTC  | 0  | 12  | RDR2-sensitive |
| CTCTCTGCACAGGCGCGGACGGTC  | 1  | 35  | RDR2-sensitive |
| CTCTCTGCACAGGCGTGGACGGTC  | 0  | 11  | RDR2-sensitive |
| CTCTCTGCACAGGGGCGGACGGTC  | 4  | 41  | RDR2-sensitive |
| CTCTCTGCCGGACACGTTAGCATA  | 2  | 33  | RDR2-sensitive |
| CTCTCTGCCGGATACGTTAGCATA  | 0  | 11  | RDR2-sensitive |
| CTCTCTGCGACGGTGTGGACGGGT  | 0  | 14  | RDR2-sensitive |
| CTCTCTGCGCAGACTGTCCGGTGC  | 0  | 9   | RDR2-sensitive |
| CTCTCTGCGCTATTGTAGACGGTT  | 0  | 15  | RDR2-sensitive |
| CTCTCTGCGGAGCCGATGACGGTC  | 0  | 12  | RDR2-sensitive |
| CTCTCTGCGGAGGCGTAGACGGTC  | 0  | 11  | RDR2-sensitive |
| CTCTCTGGGCCGTGCTTGGACACA  | 0  | 20  | RDR2-sensitive |
| CTCTCTGGTCAAGCGCGGACGGTC  | 1  | 18  | RDR2-sensitive |
| CTCTCTGGTCAGACGCGGACGGTC  | 3  | 62  | RDR2-sensitive |
| CTCTCTGGTCAGACGTGGACGGTC  | 0  | 17  | RDR2-sensitive |
| CTCTCTGGTCAGGACTATGGACGG  | 0  | 14  | RDR2-sensitive |
| CTCTCTGGTCAGGCACGGACGGTC  | 0  | 9   | RDR2-sensitive |
| CTCTCTGGTCAGGCGCGGACGGTC  | 15 | 271 | RDR2-sensitive |
| CTCTCTGGTCAGGCGTGGACGGTC  | 1  | 20  | RDR2-sensitive |
| CTCTCTGTAGAGGCGTGGACGGTC  | 0  | 17  | RDR2-sensitive |
| CTCTCTGTAGCGGTTCCGACGGTT  | 0  | 14  | RDR2-sensitive |
| CTCTCTGTGTTGGGTTGCTGGGAA  | 0  | 16  | RDR2-sensitive |
| CTCTGACCATCGCGCATCTGACGC  | 0  | 9   | RDR2-sensitive |
| CTCTGACCAGGACTTTGTTGCGG   | 0  | 10  | RDR2-sensitive |
| CTCTGACCTAGCCGAAGTGTCTA   | 0  | 21  | RDR2-sensitive |
| CTCTGACGGGCTGGTGGTGGCACG  | 0  | 16  | RDR2-sensitive |
| CTCTGACTGTAGCGCGGACCGGT   | 0  | 23  | RDR2-sensitive |
| CTCTGAGGACGACGGGACGTCGGT  | 0  | 18  | RDR2-sensitive |
| CTCTGATCAGTAGGAGGGCTCGGG  | 1  | 15  | RDR2-sensitive |
| CTCTGATCAGTAGGGAGGCTCGGA  | 5  | 20  | RDR2-sensitive |
| CTCTGATCAGTAGGGGGGCTCGGG  | 1  | 13  | RDR2-sensitive |
| CTCTGCACGCTTCCGGACGGTCTG  | 0  | 9   | RDR2-sensitive |
| CTCTGCAGAGTGTAAGACTGGTAT  | 2  | 30  | RDR2-sensitive |
| CTCTGCAGATCTCCCGAAGAGGCT  | 0  | 9   | RDR2-sensitive |
| CTCTGCAGATTGTAAGACCGGTAT  | 0  | 16  | RDR2-sensitive |
| CTCTGCAGCTGTAGGTGGCTTCTT  | 0  | 13  | RDR2-sensitive |
| CTCTGCAGGTAGAGCTGTACGGGC  | 0  | 19  | RDR2-sensitive |
| CTCTGCATGTAGAGCTGTACGGGC  | 0  | 11  | RDR2-sensitive |
| CTCTGCCACGTCAGCTAGCTCGGT  | 0  | 12  | RDR2-sensitive |
| CTCTGCCGGACACGTTAGCGCATA  | 0  | 19  | RDR2-sensitive |
| CTCTGCCTCGCAGGGTTGGACGGT  | 0  | 10  | RDR2-sensitive |
| CTCTGCCTGACGGCCGGACGGTCC  | 0  | 11  | RDR2-sensitive |
| CTCTGCGAAGACTGGGCCTCGGGC  | 1  | 18  | RDR2-sensitive |
| CTCTGCGCAGACTGTCCGGTGCCCT | 0  | 9   | RDR2-sensitive |
| CTCTGCGCGTGCATGTAGAAGTGG  | 0  | 19  | RDR2-sensitive |
| CTCTGCGGACGGCGATTCGGAGG   | 0  | 12  | RDR2-sensitive |
| CTCTGCGGCAGAGGCTGAACGGGC  | 0  | 10  | RDR2-sensitive |

|                           |    |     |                |
|---------------------------|----|-----|----------------|
| CTCTGCTAGTGGACCCGTGGGATA  | 0  | 13  | RDR2-sensitive |
| CTCTGCTCAGCCAGAACTCGGCAA  | 0  | 11  | RDR2-sensitive |
| CTCTGCTCGGACCGAGACGAGGCC  | 0  | 12  | RDR2-sensitive |
| CTCTGCTCGGCTCGATGGTACAGC  | 0  | 9   | RDR2-sensitive |
| CTCTGCTCGGCTGGACGACTGCAT  | 1  | 132 | RDR2-sensitive |
| CTCTGCTCGTAGTGGACCAGCATG  | 0  | 9   | RDR2-sensitive |
| CTCTGCTGAGCGGGAGTTCTGGAC  | 21 | 0   | RDR2-resistant |
| CTCTGCTGAGCGGGAGTTCTGGAT  | 14 | 0   | RDR2-resistant |
| CTCTGCTGCTCCAGTGCACAGGCT  | 0  | 10  | RDR2-sensitive |
| CTCTGGACATGGCAGACTGCACCA  | 0  | 12  | RDR2-sensitive |
| CTCTGGACCAGACTCTACAGGCGC  | 0  | 19  | RDR2-sensitive |
| CTCTGGACCTGCTTTTAGCGGCTT  | 2  | 20  | RDR2-sensitive |
| CTCTGGACCTGCTTTTAGTGGCTT  | 0  | 15  | RDR2-sensitive |
| CTCTGGAGTTAGGGTGTTTGGCAT  | 3  | 34  | RDR2-sensitive |
| CTCTGGATAATGGGGGCATGAGCA  | 46 | 12  | RDR2-resistant |
| CTCTGGCCAGGCATGTAGGACTGT  | 0  | 10  | RDR2-sensitive |
| CTCTGGCCTAGCCGAAGTGCCTA   | 1  | 33  | RDR2-sensitive |
| CTCTGGCGTTGGCTGAGCAGTCGG  | 0  | 19  | RDR2-sensitive |
| CTCTGGCTCTGTGACGGTGACCAT  | 0  | 24  | RDR2-sensitive |
| CTCTGGGCATCTGAGGCATCTGAG  | 1  | 15  | RDR2-sensitive |
| CTCTGGGCTAGACTTATATGGCAT  | 0  | 13  | RDR2-sensitive |
| CTCTGGTACCGTAGCAAGATGATT  | 0  | 16  | RDR2-sensitive |
| CTCTGGTCACTGTTACGGCACTT   | 21 | 0   | RDR2-resistant |
| CTCTGGTCAGACGCGGACGGTCCG  | 3  | 29  | RDR2-sensitive |
| CTCTGGTCAGGACTACGGACGGTC  | 0  | 23  | RDR2-sensitive |
| CTCTGGTCAGGACTATGGACGGTC  | 0  | 19  | RDR2-sensitive |
| CTCTGGTCAGGACTGCGGACGGTC  | 12 | 111 | RDR2-sensitive |
| CTCTGGTCAGGCGCGGACGGTCCG  | 5  | 62  | RDR2-sensitive |
| CTCTGGTCAGGCGCGGACGGTCCT  | 0  | 9   | RDR2-sensitive |
| CTCTGGTCATGACTGCGGACGGTC  | 1  | 32  | RDR2-sensitive |
| CTCTGGTCTGGACTGCGGACGGTC  | 0  | 20  | RDR2-sensitive |
| CTCTGTAGAGTGTA AAACTGGTAT | 0  | 32  | RDR2-sensitive |
| CTCTGTAGCAGCACGGACGGTCCG  | 0  | 11  | RDR2-sensitive |
| CTCTGTAGCGGGCTTAGACGACCC  | 0  | 12  | RDR2-sensitive |
| CTCTGTAGCGTTCGGCATTGAGTC  | 0  | 45  | RDR2-sensitive |
| CTCTGTAGGCCGACGGTCCGCGC   | 0  | 12  | RDR2-sensitive |
| CTCTGTAGGGCTGGGCATTGCGTT  | 0  | 9   | RDR2-sensitive |
| CTCTGTATCTGTGGGAGCAGGCTC  | 0  | 19  | RDR2-sensitive |
| CTCTGTATGGTGAATTATGTCAT   | 1  | 31  | RDR2-sensitive |
| CTCTGTCAGACCAGCGACTGCAGC  | 0  | 24  | RDR2-sensitive |
| CTCTGTCAGACCAGCGGCTGCAGC  | 0  | 15  | RDR2-sensitive |
| CTCTGTCGACGAGCACACCGGACA  | 0  | 19  | RDR2-sensitive |
| CTCTGTCGACTGAAGGGCGCGCGT  | 1  | 20  | RDR2-sensitive |
| CTCTGTCGAGATGCGCAAGGACGA  | 0  | 14  | RDR2-sensitive |
| CTCTGTCGAGATGCGCGAGGACGA  | 0  | 23  | RDR2-sensitive |
| CTCTGTCGGGTCTGGTGGGGACGG  | 0  | 15  | RDR2-sensitive |
| CTCTGTCGTGCTTATGGGAAGGGA  | 6  | 122 | RDR2-sensitive |
| CTCTGTCGTGCTTCTGGGAAGGGA  | 0  | 12  | RDR2-sensitive |
| CTCTGTGCGTACGGACGGTCCGA   | 0  | 9   | RDR2-sensitive |

|                            |    |     |                |
|----------------------------|----|-----|----------------|
| CTCTGTGCTCGTAGAAGGTGGGAC   | 0  | 15  | RDR2-sensitive |
| CTCTGTGCTGTAGACGCGTTTCT    | 0  | 10  | RDR2-sensitive |
| CTCTGTGGATTTACTCGCCGGCAC   | 0  | 21  | RDR2-sensitive |
| CTCTGTGTCGAGCCGGACGGTCGA   | 1  | 19  | RDR2-sensitive |
| CTCTGTTCACTGTAAGACATTGGC   | 1  | 19  | RDR2-sensitive |
| CTCTGTTCTGGAGACGCAGGCGAC   | 0  | 12  | RDR2-sensitive |
| CTCTGTTTTGGAGACGCATCTGAC   | 0  | 11  | RDR2-sensitive |
| CTCTGTTTTGGAGACGTAGGCGAC   | 0  | 15  | RDR2-sensitive |
| CTCTTAATTGCAGGTTGTTGGACA   | 31 | 1   | RDR2-resistant |
| CTCTTACGGAGAAACGGCTCTAA    | 0  | 13  | RDR2-sensitive |
| CTCTTACGGAGAGACGACTCTAA    | 0  | 11  | RDR2-sensitive |
| CTCTTACGGAGAGACGGCTCTAA    | 6  | 183 | RDR2-sensitive |
| CTCTTACGGAGAGACGGCTCTAT    | 0  | 11  | RDR2-sensitive |
| CTCTTACGGCTGCATGCGTGAGTA   | 0  | 9   | RDR2-sensitive |
| CTCTTACGGCTGTATACGCGGGTA   | 0  | 72  | RDR2-sensitive |
| CTCTTCCGTCAGCAGTAGAGGCGC   | 0  | 46  | RDR2-sensitive |
| CTCTTCGCGGAGAGACGGCTCTAA   | 1  | 91  | RDR2-sensitive |
| CTCTTCGGGACCGTAGCGTTGGGC   | 0  | 14  | RDR2-sensitive |
| CTCTTCGTCAAGCCGGCAGGTCTC   | 0  | 9   | RDR2-sensitive |
| CTCTTCTTTGTTTCATGTTGGAT    | 53 | 1   | RDR2-resistant |
| CTCTTGACGTGTAGAGGACGAGAA   | 0  | 16  | RDR2-sensitive |
| CTCTTGAAGGCACGCAGGACTGT    | 0  | 12  | RDR2-sensitive |
| CTCTTGTTCCATTGTCGTCGTGAC   | 0  | 12  | RDR2-sensitive |
| CTCTTTCTGCAGGACCTTCGGCGA   | 0  | 10  | RDR2-sensitive |
| CTCTTTGACTGACTGTGGCGTGCC   | 0  | 10  | RDR2-sensitive |
| CTCTTTGCTGAGTGCCCGTTGGAC   | 0  | 29  | RDR2-sensitive |
| CTCTTTGTTGGACGGAGAGAGGAG   | 0  | 15  | RDR2-sensitive |
| CTGAAAATCTGGCTGTGGGGAGAA   | 0  | 12  | RDR2-sensitive |
| CTGAAACCTGAATATTTGACGGAT   | 0  | 9   | RDR2-sensitive |
| CTGAAAGGCTAGAACTGATCCGGC   | 0  | 17  | RDR2-sensitive |
| CTGAACAACGACGGCCTTCAGCTT   | 0  | 11  | RDR2-sensitive |
| CTGAACACTCGGCACAGAACGGCA   | 0  | 12  | RDR2-sensitive |
| CTGAACACTCGGCACAGGACGCAC   | 0  | 13  | RDR2-sensitive |
| CTGAACACTCGGCACAGGGGGCTC   | 1  | 13  | RDR2-sensitive |
| CTGAACACTCGGCACAGGTAGGCA   | 2  | 19  | RDR2-sensitive |
| CTGAACACTGACCAACGATCGCGC   | 0  | 16  | RDR2-sensitive |
| CTGAACAGTCGACGTGAGGACCGT   | 0  | 9   | RDR2-sensitive |
| CTGAACCAGACGAAGGACGGGCTG   | 0  | 14  | RDR2-sensitive |
| CTGAACCCGTCGACTCGCACGCAT   | 5  | 26  | RDR2-sensitive |
| CTGAACGTCGAGCCAGGCCGAGCT   | 0  | 12  | RDR2-sensitive |
| CTGAACCTCGACGGGTA CTGCACAC | 0  | 31  | RDR2-sensitive |
| CTGAACCTGATAAGCTGCTGCAGAA  | 0  | 13  | RDR2-sensitive |
| CTGAACCTGCCTGAGTCTGCATCAG  | 0  | 12  | RDR2-sensitive |
| CTGAACCTGTTGATGTTGATGACGT  | 0  | 14  | RDR2-sensitive |
| CTGAAGACTGAATGTAGGGACGTT   | 0  | 9   | RDR2-sensitive |
| CTGAAGACTGCTGCTTGATCCGCT   | 24 | 3   | RDR2-resistant |
| CTGAAGATGCAGAGGCCAGAACAT   | 0  | 9   | RDR2-sensitive |
| CTGAAGCTTCGGTAGAAGGCTGGT   | 14 | 0   | RDR2-resistant |
| CTGAAGGATGGACGATCACGGTGG   | 53 | 0   | RDR2-resistant |

|                            |    |    |                |
|----------------------------|----|----|----------------|
| CTGAAGGGTTTGAGGGGACGACGC   | 1  | 20 | RDR2-sensitive |
| CTGAATATCTGAGCTGGGCGGCAT   | 0  | 9  | RDR2-sensitive |
| CTGAATCCTGATCGTCTGATGCAG   | 0  | 10 | RDR2-sensitive |
| CTGAATCGTTGGTTTTGATGGCAT   | 0  | 15 | RDR2-sensitive |
| CTGAATCTGATCCGGATCTTCGCT   | 25 | 3  | RDR2-resistant |
| CTGAATTTTGTTCAGGGATTCGG    | 0  | 10 | RDR2-sensitive |
| CTGACAACTGTGGAGGAGGAGAC    | 0  | 23 | RDR2-sensitive |
| CTGACAGAAGACGACGGGGAACGT   | 0  | 11 | RDR2-sensitive |
| CTGACAGAAGGACAGCGCCGCCTG   | 1  | 28 | RDR2-sensitive |
| CTGACAGTGCTCTCTACAGGACGG   | 0  | 38 | RDR2-sensitive |
| CTGACAGTGGCACTCGGCAAAGAA   | 1  | 14 | RDR2-sensitive |
| CTGACATAGCAGCTCCGACTTCAC   | 0  | 13 | RDR2-sensitive |
| CTGACATCCACGGGCTAGCAGGCG   | 0  | 15 | RDR2-sensitive |
| CTGACATCGATGTAGCGGCGACAC   | 0  | 19 | RDR2-sensitive |
| CTGACATCTGCAGAACGCAACCAC   | 0  | 13 | RDR2-sensitive |
| CTGACATGTATGCTTAGTTGACGA   | 24 | 2  | RDR2-resistant |
| CTGACATGTCGGGTACAGATTCGG   | 2  | 28 | RDR2-sensitive |
| CTGACCACGTCGTGTCTTCGTCGG   | 0  | 9  | RDR2-sensitive |
| CTGACCAGAGACACCGCCACGGT    | 0  | 9  | RDR2-sensitive |
| CTGACCAGAGACACCGCCCGCGG    | 1  | 34 | RDR2-sensitive |
| CTGACCAGTCTGACAGAAGGACAG   | 0  | 12 | RDR2-sensitive |
| CTGACCATGAACCGAGCGAGCCAG   | 1  | 17 | RDR2-sensitive |
| CTGACCCCTTGTAAGCTGGCCT     | 19 | 0  | RDR2-resistant |
| CTGACCCGTCTGGGTTTTGGGTTCCG | 0  | 22 | RDR2-sensitive |
| CTGACCGACCTGACAGAAGGACAG   | 0  | 10 | RDR2-sensitive |
| CTGACCGAGCCGAGGGACTCCTAC   | 4  | 18 | RDR2-sensitive |
| CTGACCGAGGCTCGTTGGGAAGAC   | 0  | 10 | RDR2-sensitive |
| CTGACCGGCCTGACAAGAGGACAG   | 0  | 23 | RDR2-sensitive |
| CTGACCGGCCTGACAGAAAGACAG   | 1  | 17 | RDR2-sensitive |
| CTGACCGGCCTGACAGAAGGACAG   | 2  | 49 | RDR2-sensitive |
| CTGACCTGGCTCTGACGTGGTGGC   | 0  | 12 | RDR2-sensitive |
| CTGACGAACTGTTGAGGACGACAC   | 0  | 70 | RDR2-sensitive |
| CTGACGAGTCGACGAGCTGATGAG   | 0  | 10 | RDR2-sensitive |
| CTGACGCAGCACCGTTGGATGTGG   | 0  | 29 | RDR2-sensitive |
| CTGACGCGCGGAACGACGACGAGA   | 1  | 14 | RDR2-sensitive |
| CTGACGCGTAGGACAGTTCGGCTA   | 0  | 14 | RDR2-sensitive |
| CTGACGCGTAGGACAGTTCGGCTT   | 0  | 14 | RDR2-sensitive |
| CTGACGCTGCTAGATGGTGATCGT   | 1  | 43 | RDR2-sensitive |
| CTGACGGCACTCTAGTTGAAGAAG   | 94 | 8  | RDR2-resistant |
| CTGACGGCCGATGAGCAACAGCAA   | 0  | 14 | RDR2-sensitive |
| CTGACGGGAGGGAAGGGAGCGGAT   | 2  | 19 | RDR2-sensitive |
| CTGACGGGCTGACGGACTCACGGC   | 0  | 9  | RDR2-sensitive |
| CTGACGTAGCAGCTTCGACTTCAT   | 0  | 17 | RDR2-sensitive |
| CTGACGTGGACTGGAGCTACGGTG   | 0  | 17 | RDR2-sensitive |
| CTGACTAGACACATGCAACTTCTT   | 0  | 12 | RDR2-sensitive |
| CTGACTATAGTCTGATCGTGACGT   | 0  | 9  | RDR2-sensitive |
| CTGACTGAAGAGGACGCAATCCGA   | 0  | 10 | RDR2-sensitive |
| CTGACTGAGAGACGCCACCTAGAT   | 0  | 22 | RDR2-sensitive |
| CTGACTGAGATGAGCCATAAGCGA   | 0  | 10 | RDR2-sensitive |

|                           |     |     |                |
|---------------------------|-----|-----|----------------|
| CTGACTGCGGGACGGGCGGACGGC  | 0   | 25  | RDR2-sensitive |
| CTGACTGCTTCCTCTGTAGCAGGA  | 0   | 19  | RDR2-sensitive |
| CTGACTGGCTGATGGAGCAAGGCA  | 17  | 1   | RDR2-resistant |
| CTGACTGGGAGACGCCACCTAGAT  | 1   | 21  | RDR2-sensitive |
| CTGACTGTAGCGCGCGACCGGTT   | 0   | 10  | RDR2-sensitive |
| CTGACTGTCGTATGGTGCACCGGA  | 0   | 40  | RDR2-sensitive |
| CTGACTGTTCTGTCCGAGCACGGC  | 0   | 14  | RDR2-sensitive |
| CTGACTTAGCGTAGCCTGCATCAG  | 0   | 10  | RDR2-sensitive |
| CTGACTTGAACTTGCTTGAAGAA   | 32  | 2   | RDR2-resistant |
| CTGAGAAACGTGGACGGCTGATGC  | 0   | 16  | RDR2-sensitive |
| CTGAGAATCCATGGTCGTCACCGT  | 0   | 9   | RDR2-sensitive |
| CTGAGAATCTGGCTGTGAGGAGAA  | 0   | 18  | RDR2-sensitive |
| CTGAGAGTGCCCTTTCGGTCGGAC  | 0   | 22  | RDR2-sensitive |
| CTGAGATTGATTGTAGCTATTGGC  | 826 | 101 | RDR2-resistant |
| CTGAGCAAGACGGCGACCTCTGGG  | 0   | 10  | RDR2-sensitive |
| CTGAGCACTGTGTGATGACGTCCA  | 0   | 11  | RDR2-sensitive |
| CTGAGCAGCAGTCGGTTGGTGGAG  | 1   | 16  | RDR2-sensitive |
| CTGAGCATGTAGACGCCACCGACA  | 0   | 34  | RDR2-sensitive |
| CTGAGCCCTGTAGAAGCACAGCTG  | 2   | 48  | RDR2-sensitive |
| CTGAGCCGAGTAGAGCCGAGCTGA  | 1   | 52  | RDR2-sensitive |
| CTGAGCGGGCTTCATGACCGGTGT  | 0   | 32  | RDR2-sensitive |
| CTGAGCTCTGACGTGGCGTCCTAG  | 0   | 9   | RDR2-sensitive |
| CTGAGCTCTGTGGAATGCACGTCA  | 232 | 83  | RDR2-resistant |
| CTGAGGAACCAGGCTCGGCTCGGC  | 1   | 22  | RDR2-sensitive |
| CTGAGGACGAGGCACTAGGGCGGA  | 0   | 15  | RDR2-sensitive |
| CTGAGGAGCCAGAACCTGAGACGT  | 0   | 10  | RDR2-sensitive |
| CTGAGGCACTGTTGCGCGCTCCAG  | 0   | 31  | RDR2-sensitive |
| CTGAGGCATGGTATGGATCGACGC  | 0   | 11  | RDR2-sensitive |
| CTGAGGCTAGACGGTCCGGACGGT  | 0   | 10  | RDR2-sensitive |
| CTGAGGGTTGGGCTCGGGGGTCCC  | 14  | 0   | RDR2-resistant |
| CTGAGGTATATGGCGGCGGAGGAC  | 14  | 0   | RDR2-resistant |
| CTGAGGTGTCCTGCTGAGCGTCGT  | 0   | 10  | RDR2-sensitive |
| CTGAGTCCTGTAGGAGCACAGCTG  | 1   | 19  | RDR2-sensitive |
| CTGAGTGTAGAGGAGGTCCTGAG   | 1   | 17  | RDR2-sensitive |
| CTGATATGAGCTGTGGAATGCGGA  | 0   | 38  | RDR2-sensitive |
| CTGATCATATCCAGTAGTAGTGCG  | 43  | 1   | RDR2-resistant |
| CTGATCATGTTGGACGGGCCGGCT  | 0   | 52  | RDR2-sensitive |
| CTGATGATGGTAGAGAATTGTTTC  | 142 | 15  | RDR2-resistant |
| CTGATGGACTGGCCCGAAACACGG  | 0   | 18  | RDR2-sensitive |
| CTGATGTTCTTGATTGGTTCGGTCA | 44  | 0   | RDR2-resistant |
| CTGATTACGGTTGGACTAAAACAA  | 0   | 14  | RDR2-sensitive |
| CTGATTAGACTTACTGATAGATGG  | 0   | 9   | RDR2-sensitive |
| CTGATTCCGTCTGGACCGAGGCAA  | 0   | 13  | RDR2-sensitive |
| CTGATTGCAGAGCTCGCCAGACGA  | 0   | 18  | RDR2-sensitive |
| CTGATTGGATGGCTGTGTAGGCAC  | 0   | 10  | RDR2-sensitive |
| CTGATTGGTACAATGAATATGGTA  | 0   | 13  | RDR2-sensitive |
| CTGATTGGTCGGTCCGAAGCACGG  | 0   | 63  | RDR2-sensitive |
| CTGATTGGTTGACTGCATAATCTT  | 0   | 13  | RDR2-sensitive |
| CTGATTCGCTTGGTTCGTCTGTC   | 0   | 14  | RDR2-sensitive |



|                           |    |     |                |
|---------------------------|----|-----|----------------|
| CTGATTTGTAGTGCTTTGCACGGC  | 0  | 18  | RDR2-sensitive |
| CTGATTTTTTCGGACGGATCGGAT  | 0  | 16  | RDR2-sensitive |
| CTGCAACCTGGTCAGTCGGCGCGG  | 1  | 12  | RDR2-sensitive |
| CTGCAACGGACCAGCTGAAGGGTG  | 0  | 12  | RDR2-sensitive |
| CTGCACACGCGTGGAACGTCCGGC  | 0  | 10  | RDR2-sensitive |
| CTGCACATTGAAGACGTGGGCTGC  | 0  | 16  | RDR2-sensitive |
| CTGCACCCCGCGGATTTGCTCGAG  | 0  | 12  | RDR2-sensitive |
| CTGCACCTGAACAGCATAGGGCCT  | 0  | 19  | RDR2-sensitive |
| CTGCACGGACGGGAAAACGAAGAA  | 0  | 12  | RDR2-sensitive |
| CTGCACGGATGGTTTGGTGGACGG  | 0  | 10  | RDR2-sensitive |
| CTGCACGTGGTAGATAACAAGGCGC | 0  | 14  | RDR2-sensitive |
| CTGCACTGTAGCCAACATAGGCAA  | 0  | 20  | RDR2-sensitive |
| CTGCAGAACACTACAGAACGGGTC  | 0  | 9   | RDR2-sensitive |
| CTGCAGACGGTACAGAGCATTCAT  | 0  | 10  | RDR2-sensitive |
| CTGCAGACTGAGAAGGCGTCCCAA  | 0  | 14  | RDR2-sensitive |
| CTGCAGACTGTGCACTAGAGCAGC  | 0  | 12  | RDR2-sensitive |
| CTGCAGAGGATTGTGGTATAGAGT  | 0  | 19  | RDR2-sensitive |
| CTGCAGCCTGCAACTCGTCGAGAC  | 0  | 23  | RDR2-sensitive |
| CTGCAGCCTGTGCACTGGAGCAGC  | 0  | 12  | RDR2-sensitive |
| CTGCAGCGACGTACTCGGCACCGA  | 0  | 10  | RDR2-sensitive |
| CTGCAGCGGGAGACTGGTGAGCAA  | 0  | 15  | RDR2-sensitive |
| CTGCAGGATCGAAAGGAGGCAAGG  | 21 | 0   | RDR2-resistant |
| CTGCAGGCTGCAGCCACGGACACA  | 0  | 13  | RDR2-sensitive |
| CTGCAGGCTTGGACAGGAAAACGA  | 0  | 16  | RDR2-sensitive |
| CTGCAGGTAGAGCTGTACGGGCAT  | 1  | 108 | RDR2-sensitive |
| CTGCAGTACGTCAGAGGAACCGGC  | 1  | 14  | RDR2-sensitive |
| CTGCAGTTCGGTATTGGAAGGCAA  | 0  | 26  | RDR2-sensitive |
| CTGCATAGTCGGGTGGCACACCAG  | 0  | 10  | RDR2-sensitive |
| CTGCATCGCGGTCTTGCTCGGCAT  | 0  | 9   | RDR2-sensitive |
| CTGCATCGGTTGAAACGGACGATT  | 0  | 12  | RDR2-sensitive |
| CTGCATGACGTAGGTGACGAGCGT  | 0  | 19  | RDR2-sensitive |
| CTGCATGGGACCTCTGCTCGACGG  | 0  | 9   | RDR2-sensitive |
| CTGCATGTAGAGCTGTACGGGCAT  | 0  | 40  | RDR2-sensitive |
| CTGCCACGTCACGAAGCTCGGCGC  | 0  | 20  | RDR2-sensitive |
| CTGCCACGTTGGTAAGCTCGGCGT  | 0  | 9   | RDR2-sensitive |
| CTGCCCATCGGACCTTCAGTACGG  | 0  | 12  | RDR2-sensitive |
| CTGCCCTGTTTTCTGTAGAGGTAT  | 0  | 10  | RDR2-sensitive |
| CTGCCGACTTATGGCGTGACTCGG  | 0  | 14  | RDR2-sensitive |
| CTGCCGCTGTAGACAGAAGATGGG  | 0  | 9   | RDR2-sensitive |
| CTGCCGGATTGATGGAGAGTCGGT  | 0  | 11  | RDR2-sensitive |
| CTGCCGGCGTGGTGGAGAGTCGTT  | 0  | 15  | RDR2-sensitive |
| CTGCCGGCTTGACGAAGAGGTGAT  | 0  | 11  | RDR2-sensitive |
| CTGCCGGGACTGAGGAGATGCATT  | 0  | 15  | RDR2-sensitive |
| CTGCCTAGAGGACTACGAGGACGG  | 0  | 11  | RDR2-sensitive |
| CTGCCTCGACTGCATGAACGGCGC  | 0  | 9   | RDR2-sensitive |
| CTGCCTGACGGTCGGACGGTCCGC  | 1  | 12  | RDR2-sensitive |
| CTGCCTTCGTTCAATCTGGATCGT  | 0  | 20  | RDR2-sensitive |
| CTGCGACACGTCAGAGCTCGGCAC  | 0  | 12  | RDR2-sensitive |
| CTGCGACAGGGTAGATGCGACAGG  | 0  | 21  | RDR2-sensitive |

|                           |    |     |                |
|---------------------------|----|-----|----------------|
| CTGCGACATGGACTGTAGGAGCGG  | 1  | 47  | RDR2-sensitive |
| CTGCGACTGTGCAGAGAGCACCGC  | 0  | 24  | RDR2-sensitive |
| CTGCGACTTCAGTAGACGCGGCCT  | 0  | 17  | RDR2-sensitive |
| CTGCGATGCAGAACTGATTGGCGA  | 0  | 10  | RDR2-sensitive |
| CTGCGATTTCGGTCGGTCGGTGCGG | 1  | 12  | RDR2-sensitive |
| CTGCGATTTGGTCGGTCGGTGCGG  | 2  | 18  | RDR2-sensitive |
| CTGCGCACACGTAGACGGTCTGTG  | 1  | 36  | RDR2-sensitive |
| CTGCGCACATGTGGACCGTCCGAT  | 0  | 9   | RDR2-sensitive |
| CTGCGCACGCGCGGACTGTCCGGA  | 0  | 10  | RDR2-sensitive |
| CTGCGCACGCGCGGACTGTCCGGC  | 0  | 10  | RDR2-sensitive |
| CTGCGCACGCGTGGATTGTCCGGA  | 0  | 10  | RDR2-sensitive |
| CTGCGCACGTGCGGACTGTCCGGC  | 0  | 11  | RDR2-sensitive |
| CTGCGCAGTTGAACTCGAGGTGGC  | 0  | 21  | RDR2-sensitive |
| CTGCGCATCTGTGGAGCCAGGCTC  | 4  | 821 | RDR2-sensitive |
| CTGCGCATCTGTGGAGTCAGGCTC  | 0  | 19  | RDR2-sensitive |
| CTGCGCATGTAGTCTTGAGGGCGT  | 0  | 22  | RDR2-sensitive |
| CTGCGCCGGATCGGAGGATGTCAT  | 1  | 13  | RDR2-sensitive |
| CTGCGCCTAGGGCTGACAAGACGC  | 0  | 9   | RDR2-sensitive |
| CTGCGCCTAGGGCTGACATGGCAT  | 1  | 19  | RDR2-sensitive |
| CTGCGCCTAGGGCTGACCTGGCAT  | 0  | 9   | RDR2-sensitive |
| CTGCGCGCGCAGAAGTCAGAGCAG  | 0  | 11  | RDR2-sensitive |
| CTGCGCGCGGAACGAGGAGGGCAG  | 0  | 13  | RDR2-sensitive |
| CTGCGCGCGTAGAAGCTGGGCTGC  | 0  | 14  | RDR2-sensitive |
| CTGCGCGGACAGAAGTGCAGCAGA  | 9  | 26  | RDR2-sensitive |
| CTGCGCGGGGATGGAATTGGACGG  | 0  | 18  | RDR2-sensitive |
| CTGCGCGTGCATGTAGAAGTGGTG  | 0  | 25  | RDR2-sensitive |
| CTGCGCGTGCATGTGGAAGCGGTG  | 0  | 21  | RDR2-sensitive |
| CTGCGCTATTGTAGACGGTTCGAG  | 0  | 42  | RDR2-sensitive |
| CTGCGCTGGAAGACTGTCCGCATG  | 0  | 10  | RDR2-sensitive |
| CTGCGGACGGTGATTTAGAGGCT   | 0  | 13  | RDR2-sensitive |
| CTGCGGACTGTGGGCGGTTCGGCTT | 0  | 10  | RDR2-sensitive |
| CTGCGGATTAGCAGTAGGGACCGC  | 0  | 10  | RDR2-sensitive |
| CTGCGGCAATATACTCGGCTTCGG  | 4  | 21  | RDR2-sensitive |
| CTGCGGCAATGTACTCGGCTTCGG  | 14 | 77  | RDR2-sensitive |
| CTGCGGCGTAGGCCTAAGTGACGG  | 0  | 14  | RDR2-sensitive |
| CTGCGGCTGCGGCTTCTACAGTAT  | 0  | 24  | RDR2-sensitive |
| CTGCGGGCTGGTTGACGCGGTCTA  | 0  | 35  | RDR2-sensitive |
| CTGCGGGCTGTACGGCGCGGAGTA  | 9  | 25  | RDR2-sensitive |
| CTGCGTACGCGTGGACGGTCTGCA  | 0  | 10  | RDR2-sensitive |
| CTGCGTCAGACACGGACCGTCCGA  | 0  | 15  | RDR2-sensitive |
| CTGCGTCATCGTAGATCGTCCGGC  | 0  | 64  | RDR2-sensitive |
| CTGCGTCCGAGACTGCCCGGGCTG  | 0  | 9   | RDR2-sensitive |
| CTGCGTGAGGACTGAGGAGCCGGC  | 0  | 9   | RDR2-sensitive |
| CTGCGTGCAGGACCGGATGACGCA  | 0  | 11  | RDR2-sensitive |
| CTGCGTGCTGTTTGGACGGTCCGT  | 0  | 10  | RDR2-sensitive |
| CTGCGTGGCCTGTGGCGAAGTCGG  | 0  | 10  | RDR2-sensitive |
| CTGCGTTTGGTGTAGAGATGGCAA  | 0  | 11  | RDR2-sensitive |
| CTGCTAACTTTACTCGGACGGTG   | 0  | 9   | RDR2-sensitive |
| CTGCTAGGAGCCTAGGACGACGGT  | 1  | 12  | RDR2-sensitive |

|                           |      |     |                |
|---------------------------|------|-----|----------------|
| CTGCTAGTCGTGTCGGGCCGGCCC  | 1    | 12  | RDR2-sensitive |
| CTGCTATCCAGATTGTAGATGCAT  | 0    | 14  | RDR2-sensitive |
| CTGCTATTGTAGGGCTTGTTCCGT  | 0    | 21  | RDR2-sensitive |
| CTGCTCACTCTACGCGGATGACGC  | 0    | 10  | RDR2-sensitive |
| CTGCTCAGGCTGTACGCGGACAGA  | 0    | 10  | RDR2-sensitive |
| CTGCTCCTGTTTCTGCTCGTCGTA  | 33   | 1   | RDR2-resistant |
| CTGCTCGTTGTATTGGTCGGTCAG  | 0    | 14  | RDR2-sensitive |
| CTGCTCTCCGAACCTGATGGCAC   | 0    | 10  | RDR2-sensitive |
| CTGCTCTCTGCGGCACACCGGACA  | 0    | 11  | RDR2-sensitive |
| CTGCTGAAGGCTTTATACCACTGT  | 0    | 10  | RDR2-sensitive |
| CTGCTGACGCGCAGAACGACGACG  | 0    | 13  | RDR2-sensitive |
| CTGCTGACTCTGTGCGGGCCGGCCC | 0    | 9   | RDR2-sensitive |
| CTGCTGACTGTACGGCTGTACCGT  | 0    | 15  | RDR2-sensitive |
| CTGCTGACTGTGCCAGACTGGCTC  | 0    | 11  | RDR2-sensitive |
| CTGCTGATAGACCTGGCTACTAGA  | 0    | 28  | RDR2-sensitive |
| CTGCTGATCAGATCATCGACGGTA  | 0    | 12  | RDR2-sensitive |
| CTGCTGCCTGATCCTGAAGACGTT  | 0    | 29  | RDR2-sensitive |
| CTGCTGCGGGCTGAGCGCGCGGAA  | 1    | 15  | RDR2-sensitive |
| CTGCTGGAAGGGCCCGAACGGTAT  | 0    | 13  | RDR2-sensitive |
| CTGCTGGAGAGCGTAGAGGACCAT  | 0    | 14  | RDR2-sensitive |
| CTGCTGGGGACGGATGGAACACAC  | 0    | 13  | RDR2-sensitive |
| CTGCTGGTGCGGACTAGGAGGCAA  | 1    | 68  | RDR2-sensitive |
| CTGCTGTAGTGACATGGACGACAT  | 1    | 15  | RDR2-sensitive |
| CTGCTGTTTGCTGTGGACGGATGT  | 0    | 10  | RDR2-sensitive |
| CTGCTTCAGACGACTCGAACGGCG  | 0    | 21  | RDR2-sensitive |
| CTGCTTGACTGAGGCACGTAGAA   | 0    | 13  | RDR2-sensitive |
| CTGCTTTGTCTCTGTGCGGACCAGC | 0    | 10  | RDR2-sensitive |
| CTGCTTTTGCTGGATTCCTGGGC   | 55   | 4   | RDR2-resistant |
| CTGGAACCGGTGTATTTTGAAGAG  | 0    | 13  | RDR2-sensitive |
| CTGGAACCGTCTGTGTAGAGGCTA  | 0    | 15  | RDR2-sensitive |
| CTGGAACCTGGAAGCGGAGCTCGG  | 0    | 13  | RDR2-sensitive |
| CTGGAACGAGCCGTCTGAAGGTGC  | 0    | 11  | RDR2-sensitive |
| CTGGAACGGGCTCGACGAGATGAA  | 0    | 26  | RDR2-sensitive |
| CTGGAACTGAAGGCGCGCCTGGGC  | 0    | 17  | RDR2-sensitive |
| CTGGAAGACGGCGAACTCCGCTCC  | 0    | 12  | RDR2-sensitive |
| CTGGAATGTGGAAGCATACAGCGC  | 0    | 11  | RDR2-sensitive |
| CTGGACAAAATGCTCGCGGCTCGT  | 0    | 15  | RDR2-sensitive |
| CTGGACAACGTGAGCGGAGGCTTC  | 0    | 33  | RDR2-sensitive |
| CTGGACACTCGGCAAAGACCCCAT  | 0    | 14  | RDR2-sensitive |
| CTGGACACTCGGCACAGGACCCCA  | 0    | 11  | RDR2-sensitive |
| CTGGACACTCGGCACAGGACGACA  | 0    | 18  | RDR2-sensitive |
| CTGGACAGAGATGAGCTGGAGCGG  | 0    | 9   | RDR2-sensitive |
| CTGGACAGCGGCTGGGAGGAGGGC  | 2091 | 105 | RDR2-resistant |
| CTGGACAGCGGCTGGGAGGAGGGG  | 59   | 2   | RDR2-resistant |
| CTGGACAGGGATACGCAGCAACAA  | 0    | 13  | RDR2-sensitive |
| CTGGACAGGGGCACGCAACAACAA  | 0    | 11  | RDR2-sensitive |
| CTGGACAGTAGAAGTTGCAGGTAT  | 0    | 9   | RDR2-sensitive |
| CTGGACAGTGGATAGAGGTAGGCT  | 0    | 14  | RDR2-sensitive |
| CTGGACAGTTCAACCTGCGGACGG  | 0    | 13  | RDR2-sensitive |

|                           |   |     |                |
|---------------------------|---|-----|----------------|
| CTGGACATGGCAGACTGCACCAGC  | 0 | 39  | RDR2-sensitive |
| CTGGACATGTCAGACTGCACCAGC  | 0 | 49  | RDR2-sensitive |
| CTGGACCACTGCGTGCATTGACTC  | 1 | 20  | RDR2-sensitive |
| CTGGACCAGCTTACATGACGCGTG  | 0 | 9   | RDR2-sensitive |
| CTGGACCAGTTAGACAGACCGAGC  | 0 | 10  | RDR2-sensitive |
| CTGGACCAGTTGAACGGACCGAGC  | 0 | 13  | RDR2-sensitive |
| CTGGACCAGTTGAACGGGCCGAAC  | 0 | 9   | RDR2-sensitive |
| CTGGACCCGGCACGACTTTGGCGT  | 0 | 94  | RDR2-sensitive |
| CTGGACCCGGCACGACTTTGGTGT  | 0 | 22  | RDR2-sensitive |
| CTGGACCGACGAAAATGAGGCGTA  | 0 | 9   | RDR2-sensitive |
| CTGGACCGCATCCAACGACGACAT  | 0 | 9   | RDR2-sensitive |
| CTGGACCGGACGGCGTTAACCTT   | 0 | 10  | RDR2-sensitive |
| CTGGACCGTTTGCGCAGAGAGACC  | 0 | 10  | RDR2-sensitive |
| CTGGACCTAGACCGCGTCAGCCAG  | 0 | 11  | RDR2-sensitive |
| CTGGACCTGAGCGCGGCTGACCAG  | 0 | 10  | RDR2-sensitive |
| CTGGACCTGCCACCTGACGAGCAA  | 0 | 11  | RDR2-sensitive |
| CTGGACCTGGACTCAAAGCTCGGC  | 0 | 28  | RDR2-sensitive |
| CTGGACGAACAGACAGACAGGCAT  | 0 | 11  | RDR2-sensitive |
| CTGGACGAGGCCGTGAATTTGCAC  | 0 | 9   | RDR2-sensitive |
| CTGGACGATGCATGGCGCTGCTGC  | 0 | 13  | RDR2-sensitive |
| CTGGACGCGGGACGAACACGAAGG  | 0 | 15  | RDR2-sensitive |
| CTGGACGCTCCTCATGAAGATCAA  | 0 | 9   | RDR2-sensitive |
| CTGGACGGCAGTAGAAAACGACGT  | 0 | 11  | RDR2-sensitive |
| CTGGACGGCTACTGTAGCCACGG   | 0 | 15  | RDR2-sensitive |
| CTGGACGGGGCTGGTGGACAGGTA  | 1 | 16  | RDR2-sensitive |
| CTGGACGGTATGCACGGTGGGCAA  | 0 | 19  | RDR2-sensitive |
| CTGGACGGTGTGCACGGTGGGCAT  | 1 | 17  | RDR2-sensitive |
| CTGGACGGTTTCTAGTAGCGGCGT  | 0 | 10  | RDR2-sensitive |
| CTGGACGTAGGGCCTACAAGGCAG  | 0 | 16  | RDR2-sensitive |
| CTGGACGTGGACGACGGAATTGGT  | 0 | 10  | RDR2-sensitive |
| CTGGACTCTCGACTCTAGGGGCAT  | 0 | 16  | RDR2-sensitive |
| CTGGACTCTGAGCCGTTGGAGGTG  | 0 | 35  | RDR2-sensitive |
| CTGGACTCTGTCCGAGCTGTTCCGG | 0 | 9   | RDR2-sensitive |
| CTGGACTGGACGAGATGACGAGTG  | 0 | 11  | RDR2-sensitive |
| CTGGACTGGGACACGCAGCGACAA  | 1 | 14  | RDR2-sensitive |
| CTGGACTGGGGAAGATGGTGCCTG  | 1 | 27  | RDR2-sensitive |
| CTGGACTGGGGCACGCGACGACAT  | 0 | 10  | RDR2-sensitive |
| CTGGACTGGGGCACGCGGCGACAA  | 0 | 12  | RDR2-sensitive |
| CTGGACTGGGGCACGCGGCGACAC  | 0 | 10  | RDR2-sensitive |
| CTGGACTGGGGCACGCGGCGACAT  | 0 | 13  | RDR2-sensitive |
| CTGGACTGGTTCGGCGAAGGGCTG  | 3 | 67  | RDR2-sensitive |
| CTGGACTGTCCAGTGGAGCACCGG  | 0 | 116 | RDR2-sensitive |
| CTGGACTGTCCATCGTAGCGGCAC  | 0 | 18  | RDR2-sensitive |
| CTGGACTGTCCCGATGACGCAGA   | 0 | 9   | RDR2-sensitive |
| CTGGACTGTCCCGGTGGTGGCGC   | 0 | 20  | RDR2-sensitive |
| CTGGACTGTCTACCGTAGCGGCAC  | 3 | 20  | RDR2-sensitive |
| CTGGACTGTGCTGAAGAGCTGCAA  | 0 | 24  | RDR2-sensitive |
| CTGGACTGTGGAAGATGGTGTCTG  | 0 | 13  | RDR2-sensitive |
| CTGGACTTATTCGGGCGGCCGA    | 0 | 10  | RDR2-sensitive |

|                           |    |    |                |
|---------------------------|----|----|----------------|
| CTGGAGACAGAGAACGAGCAACAG  | 0  | 11 | RDR2-sensitive |
| CTGGAGACGTAGCACGTGTACAGC  | 0  | 10 | RDR2-sensitive |
| CTGGAGGACCTGTCCGTTTGCAGG  | 0  | 12 | RDR2-sensitive |
| CTGGAGTAGCCGAGCATGCCTGTA  | 49 | 0  | RDR2-resistant |
| CTGGAGTGGGTAGGAGAGAGACGA  | 0  | 14 | RDR2-sensitive |
| CTGGAGTGTGGCCGGTGTGGCGT   | 0  | 9  | RDR2-sensitive |
| CTGGATAGACAGCGGGGTAGATGC  | 0  | 14 | RDR2-sensitive |
| CTGGATAGAGGACGCACAGTGAAC  | 0  | 12 | RDR2-sensitive |
| CTGGATCAGGTCAGACTCGTGCAA  | 0  | 9  | RDR2-sensitive |
| CTGGATCATGTGGAAGACGACTGA  | 0  | 39 | RDR2-sensitive |
| CTGGATCATTAGAGCGCATGGGAG  | 0  | 12 | RDR2-sensitive |
| CTGGATCTCGCAGGGGGTTGGGGT  | 14 | 0  | RDR2-resistant |
| CTGGATGACGTACAGAACGACGAC  | 0  | 13 | RDR2-sensitive |
| CTGGATGCGGCAGAACCGTGCACC  | 1  | 31 | RDR2-sensitive |
| CTGGATGGACTAGCTCGAGCGGTG  | 0  | 12 | RDR2-sensitive |
| CTGGATGGTAAAGAGGACGGACCT  | 0  | 13 | RDR2-sensitive |
| CTGGATGTAGGGACGTTCCACCGG  | 0  | 10 | RDR2-sensitive |
| CTGGATGTAGTTGGTAGACGGTTC  | 0  | 11 | RDR2-sensitive |
| CTGGATGTGGCAGAACCGTGCACC  | 0  | 17 | RDR2-sensitive |
| CTGGATGTTTGAGACTCAGACGGT  | 0  | 11 | RDR2-sensitive |
| CTGGATTCGGGACCGGATACGGAT  | 2  | 96 | RDR2-sensitive |
| CTGGATTGGTTCGGTAGACACGGT  | 0  | 32 | RDR2-sensitive |
| CTGGATTGTTTCGGAGGGTCCGGAC | 0  | 12 | RDR2-sensitive |
| CTGGATTTGTACGGTACGGGGCGC  | 0  | 9  | RDR2-sensitive |
| CTGGCAAGAGACTCGATCCGGCAT  | 0  | 12 | RDR2-sensitive |
| CTGGCAATCGGACGGTCGAGATGG  | 0  | 10 | RDR2-sensitive |
| CTGGCACAACCTGAACGACGTGGC  | 0  | 9  | RDR2-sensitive |
| CTGGCACAATCAGCAGGTCCGGCAT | 0  | 9  | RDR2-sensitive |
| CTGGCACCTTCGCCCGTCGTCTCGT | 0  | 9  | RDR2-sensitive |
| CTGGCACGACACAGATCTGGCATG  | 0  | 11 | RDR2-sensitive |
| CTGGCACGAGACCCGAACCGGCAT  | 0  | 9  | RDR2-sensitive |
| CTGGCACGGCACGACAGATGACTC  | 0  | 29 | RDR2-sensitive |
| CTGGCACGGTAGAATAAGCGGGCG  | 0  | 16 | RDR2-sensitive |
| CTGGCACGTGACCCGAACCGGCAC  | 1  | 15 | RDR2-sensitive |
| CTGGCACTATTCGGACCGGGCTAA  | 0  | 10 | RDR2-sensitive |
| CTGGCATGAACCCGGCACTGACAT  | 0  | 19 | RDR2-sensitive |
| CTGGCATGTAAGCAGTAGGACATA  | 0  | 18 | RDR2-sensitive |
| CTGGCATTCAAGGGCGGGCAGAGC  | 18 | 0  | RDR2-resistant |
| CTGGCCAGCAGCCTGATCGTTGGA  | 0  | 27 | RDR2-sensitive |
| CTGGCCCAAGCATGACACTGACAA  | 0  | 21 | RDR2-sensitive |
| CTGGCCTAGAGAACCTGACGGCGT  | 0  | 9  | RDR2-sensitive |
| CTGGCCTGGAAATGTAGAGGACGT  | 0  | 14 | RDR2-sensitive |
| CTGGCCTGGATGGACTCACGGCGT  | 2  | 22 | RDR2-sensitive |
| CTGGCCTGGCTACGAAGCGTGCTG  | 0  | 10 | RDR2-sensitive |
| CTGGCGAAGGAGGATGGAGGGGCA  | 16 | 0  | RDR2-resistant |
| CTGGCGCGACTGCTAGCACGGCAC  | 0  | 11 | RDR2-sensitive |
| CTGGCGGAACATTGCGACAACCAT  | 0  | 10 | RDR2-sensitive |
| CTGGCGGGCGGACAGCAGAGAGCGG | 0  | 9  | RDR2-sensitive |
| CTGGCGTAGACTTGCAGATCTGGC  | 1  | 27 | RDR2-sensitive |

|                             |     |    |                |
|-----------------------------|-----|----|----------------|
| CTGGCGTAGGAGCGGCTCCTCTGC    | 0   | 13 | RDR2-sensitive |
| CTGGCGTGGGATGTAGGTGGGCGC    | 0   | 30 | RDR2-sensitive |
| CTGGCGTTGGCTGAGCAGTCGGAT    | 0   | 9  | RDR2-sensitive |
| CTGGCTACTGTAGTTCACGGGCCG    | 0   | 27 | RDR2-sensitive |
| CTGGCTCCTCTAAGCCCTCGTCGT    | 0   | 10 | RDR2-sensitive |
| CTGGCTCGAGCGGATTGCAGCGTA    | 0   | 9  | RDR2-sensitive |
| CTGGCTCGCTCGGATCATGGTCAG    | 0   | 18 | RDR2-sensitive |
| CTGGCTCGGCTCGGCTCGTTAGAA    | 0   | 18 | RDR2-sensitive |
| CTGGCTCGGCTTGGCTCGTTAGAA    | 0   | 9  | RDR2-sensitive |
| CTGGCTCTCGGCAAAGACTGACGG    | 0   | 16 | RDR2-sensitive |
| CTGGCTCTGACCGGTCTGCTGCAG    | 14  | 0  | RDR2-resistant |
| CTGGCTCTGACGTGGTGGCGGCGC    | 0   | 13 | RDR2-sensitive |
| CTGGCTCTGATAACCACTGAAGGAT   | 17  | 1  | RDR2-resistant |
| CTGGCTGAGAAACGATTTTTGCAT    | 0   | 16 | RDR2-sensitive |
| CTGGCTGAGTAGAAACACGGGGTT    | 0   | 29 | RDR2-sensitive |
| CTGGCTGCTCTCGGGTTTTCGTCGG   | 1   | 14 | RDR2-sensitive |
| CTGGCTGGCACGGACACGGTATGT    | 0   | 12 | RDR2-sensitive |
| CTGGCTGGCTGTAACGGTAGCTCT    | 0   | 9  | RDR2-sensitive |
| CTGGCTGTAGGGAGAATCCGGCTT    | 0   | 9  | RDR2-sensitive |
| CTGGCTTAGAGTCACGGACCGTCC    | 0   | 12 | RDR2-sensitive |
| CTGGCTTCCCTGGCTCTTTGACGG    | 0   | 16 | RDR2-sensitive |
| CTGGCTTCTCTGGCTCTGTGACGG    | 0   | 16 | RDR2-sensitive |
| CTGGGAAGAGGTGGACGACGACGG    | 0   | 16 | RDR2-sensitive |
| CTGGGAAGCATCGGACTGTCCGGT    | 1   | 18 | RDR2-sensitive |
| CTGGGAAGCTTTGGGATCTCGGGC    | 27  | 1  | RDR2-resistant |
| CTGGGACAGGCAGGACAAAGACGT    | 0   | 9  | RDR2-sensitive |
| CTGGGACATGTAGACGGTCGAGAC    | 1   | 12 | RDR2-sensitive |
| CTGGGACCTAGATGTGCTACTCGG    | 0   | 9  | RDR2-sensitive |
| CTGGGACGGTAGCGGACGACGAAA    | 0   | 9  | RDR2-sensitive |
| CTGGGACGTTGCAGAGTGGACGGT    | 0   | 9  | RDR2-sensitive |
| CTGGGACTCTGGGAGGACGTCGCC    | 0   | 12 | RDR2-sensitive |
| CTGGGAGACGACGGCCTAGACCTC    | 2   | 14 | RDR2-sensitive |
| CTGGGAGCGTGAAGATGATCTGAT    | 0   | 22 | RDR2-sensitive |
| CTGGGAGGAGGGCCGAGGGCGGGG    | 17  | 1  | RDR2-resistant |
| CTGGGAGGAGGGCCGAGGGCGGGT    | 137 | 3  | RDR2-resistant |
| CTGGGCAAATACTCGTGGCTCGT     | 0   | 13 | RDR2-sensitive |
| CTGGGCAAATACTCGTGGGTCGT     | 0   | 11 | RDR2-sensitive |
| CTGGGCACGACACAGTACGGCTGA    | 0   | 15 | RDR2-sensitive |
| CTGGGCACGCGTCGGCACGCACGC    | 0   | 19 | RDR2-sensitive |
| CTGGGCACGGCACGGCACGGCTAG    | 0   | 10 | RDR2-sensitive |
| CTGGGCAGCAGCTAGGAGCAGGGG    | 47  | 4  | RDR2-resistant |
| CTGGGCAGGAGGAGGTGCTGGGGA    | 59  | 0  | RDR2-resistant |
| CTGGGCAGGGACACGCAACAACAA    | 1   | 16 | RDR2-sensitive |
| CTGGGCAGGGACACGCAGCAACAACAA | 2   | 37 | RDR2-sensitive |
| CTGGGCATAACGCTGAGGCAGCAC    | 0   | 10 | RDR2-sensitive |
| CTGGGCATGAGGCGCATAGGACAC    | 0   | 19 | RDR2-sensitive |
| CTGGGCGACGTGCGAGAGGAACAG    | 0   | 11 | RDR2-sensitive |
| CTGGGCGATTGGTAGGAGAGGGCG    | 0   | 11 | RDR2-sensitive |
| CTGGGCGCAGGACAACACGAAGGC    | 17  | 77 | RDR2-sensitive |

|                           |     |     |                |
|---------------------------|-----|-----|----------------|
| CTGGGCGCGGGACGAACACGAAGG  | 24  | 178 | RDR2-sensitive |
| CTGGGCGTAGGACAACACGAAGGC  | 0   | 9   | RDR2-sensitive |
| CTGGGCGTGACAGTTAGACAGCGA  | 0   | 10  | RDR2-sensitive |
| CTGGGCGTGTAGAGGACGTGTCTG  | 0   | 14  | RDR2-sensitive |
| CTGGGCTACGGGCTGAAGACCAGT  | 0   | 13  | RDR2-sensitive |
| CTGGGCTAGGACACGCGGCGACAA  | 0   | 35  | RDR2-sensitive |
| CTGGGCTAGGGCGTGCAACATCAT  | 0   | 11  | RDR2-sensitive |
| CTGGGCTCTGAATGGTGTGCACGG  | 0   | 10  | RDR2-sensitive |
| CTGGGCTGAAAACGAGGGGTTTCGC | 0   | 9   | RDR2-sensitive |
| CTGGGCTGAAAACGAGGTGTTTCGC | 0   | 9   | RDR2-sensitive |
| CTGGGCTGCAGCCCCGATCGCGGC  | 0   | 11  | RDR2-sensitive |
| CTGGGCTGCTGACGTAGGTGACGA  | 0   | 14  | RDR2-sensitive |
| CTGGGCTGGAGCACGCGGCGACAA  | 0   | 12  | RDR2-sensitive |
| CTGGGCTGGGACACGCAACGACAA  | 0   | 9   | RDR2-sensitive |
| CTGGGCTGGGACACGCAGCGACAA  | 1   | 32  | RDR2-sensitive |
| CTGGGCTGGGACACGCGACGACAA  | 0   | 10  | RDR2-sensitive |
| CTGGGCTGGGACACGCGGCGACAA  | 1   | 119 | RDR2-sensitive |
| CTGGGCTGGGACACGCGGCGACAT  | 0   | 14  | RDR2-sensitive |
| CTGGGCTGGGACGCGCAGCGACAA  | 0   | 12  | RDR2-sensitive |
| CTGGGCTGGGGCACGCAGCACACT  | 0   | 19  | RDR2-sensitive |
| CTGGGCTGGGGCACGCGACGACAA  | 0   | 20  | RDR2-sensitive |
| CTGGGCTGGGGCACGCGACGACAT  | 0   | 71  | RDR2-sensitive |
| CTGGGCTGTAGCCCCGGTCACGGC  | 0   | 26  | RDR2-sensitive |
| CTGGGCTTCATATAGGTGCGCGGA  | 0   | 10  | RDR2-sensitive |
| CTGGGCTTGTGTGAGATGGTGCAT  | 0   | 26  | RDR2-sensitive |
| CTGGGCTTTTCGGGCTGGCACGGC  | 1   | 31  | RDR2-sensitive |
| CTGGGGCTGTAGCAAGTACCGGGG  | 0   | 14  | RDR2-sensitive |
| CTGGGGCTTGCCTCGAACACGGA   | 0   | 9   | RDR2-sensitive |
| CTGGGGCTTGGCAGGGGATGACGA  | 0   | 27  | RDR2-sensitive |
| CTGGGTAGCACTGAACAATCCGGT  | 0   | 15  | RDR2-sensitive |
| CTGGGTCTCATGGACCTCGCGGAC  | 21  | 0   | RDR2-resistant |
| CTGGGTGAGACGGTTGGCTCGGAC  | 0   | 9   | RDR2-sensitive |
| CTGGGTGTAGAAGAGGTCCCCGAG  | 0   | 9   | RDR2-sensitive |
| CTGGTAACGCGGCATGACATACCT  | 0   | 11  | RDR2-sensitive |
| CTGGTACCATGTAGAAGTGAGGAA  | 0   | 21  | RDR2-sensitive |
| CTGGTACTGTGACCGGCAACTAAA  | 0   | 11  | RDR2-sensitive |
| CTGGTAGAGACTGCTGAGCAGGAG  | 0   | 9   | RDR2-sensitive |
| CTGGTAGGACTCTCTGCGGAGGCG  | 0   | 25  | RDR2-sensitive |
| CTGGTATGACTAGCAGGCTGACGG  | 0   | 55  | RDR2-sensitive |
| CTGGTCAACAGGACGGTGTGACAA  | 0   | 13  | RDR2-sensitive |
| CTGGTCAACTGGCTGGGCGCGGAC  | 0   | 9   | RDR2-sensitive |
| CTGGTCACTGTTACGGCACTTGC   | 407 | 16  | RDR2-resistant |
| CTGGTCAGATGCGGTTGAACCGGC  | 14  | 0   | RDR2-resistant |
| CTGGTCAGGACCGATTGAACCGGC  | 1   | 19  | RDR2-sensitive |
| CTGGTCGAGCTGAAGGAAGTGCGG  | 0   | 12  | RDR2-sensitive |
| CTGGTCGCTCGCTCTGCCTGACGG  | 0   | 15  | RDR2-sensitive |
| CTGGTCTAGAACTGTTCCGACGT   | 0   | 9   | RDR2-sensitive |
| CTGGTGAGTCTGGACGTTGCTGGC  | 0   | 33  | RDR2-sensitive |
| CTGGTGATGGTGGGCTTTGGCGGA  | 0   | 19  | RDR2-sensitive |

|                           |     |    |                |
|---------------------------|-----|----|----------------|
| CTGGTGCACCTCATGGACAGAAGGC | 0   | 11 | RDR2-sensitive |
| CTGGTGGACCTGCAGGTGGGGCCT  | 0   | 50 | RDR2-sensitive |
| CTGGTGGACCTGTAGGTGGGGCCT  | 2   | 33 | RDR2-sensitive |
| CTGGTGGACTTACAGGTGAGACGT  | 0   | 9  | RDR2-sensitive |
| CTGGTGTGCTAATGTCGTACGGGC  | 16  | 0  | RDR2-resistant |
| CTGGTTCGGACTGCAGGAGTGGGT  | 76  | 3  | RDR2-resistant |
| CTGGTCTGCCCATCCTAGTCGGT   | 0   | 9  | RDR2-sensitive |
| CTGGTTGGACCACGTGGAGGACGT  | 0   | 11 | RDR2-sensitive |
| CTGGTTGGACCACTGACGAGATGG  | 1   | 12 | RDR2-sensitive |
| CTGGTTGTCCGCGAAGTTGAAGGC  | 0   | 10 | RDR2-sensitive |
| CTGTAACGTAGAGAGGCCCTGAG   | 0   | 9  | RDR2-sensitive |
| CTGTAACCGTCTGTGTAGAGGCTA  | 0   | 18 | RDR2-sensitive |
| CTGTAACGTTGGCTCTTGACGGAC  | 0   | 22 | RDR2-sensitive |
| CTGTAAGCTCTCCAACAAGGACAC  | 0   | 15 | RDR2-sensitive |
| CTGTACAAGATGAGCTCGGCCAG   | 0   | 9  | RDR2-sensitive |
| CTGTACAGGATAGAGTTGTGACTG  | 0   | 14 | RDR2-sensitive |
| CTGTACGAATACGTCTGTCCGCAC  | 0   | 19 | RDR2-sensitive |
| CTGTACGAGCTCCGGCACCGGCGT  | 0   | 14 | RDR2-sensitive |
| CTGTACGGGCTGCTGGAGATAGAC  | 0   | 9  | RDR2-sensitive |
| CTGTACTGTGTTGGTCCGGCGGCTG | 0   | 15 | RDR2-sensitive |
| CTGTAGAACACGCCTGCCAGACGA  | 0   | 28 | RDR2-sensitive |
| CTGTAGAACACGCCTGCTAGACGA  | 0   | 12 | RDR2-sensitive |
| CTGTAGACTGGAGCAGCAGGAACG  | 0   | 21 | RDR2-sensitive |
| CTGTAGATCAACGGCTGAAAACGC  | 0   | 9  | RDR2-sensitive |
| CTGTAGATCAACGGCTGAAAATGC  | 0   | 9  | RDR2-sensitive |
| CTGTAGATCTGTTGGCACCGGCC   | 0   | 17 | RDR2-sensitive |
| CTGTAGCAATGACGCGCGCGCCT   | 0   | 9  | RDR2-sensitive |
| CTGTAGCAGTCGACCGTTGGATCC  | 0   | 10 | RDR2-sensitive |
| CTGTAGCTACTCTGATTTAGACGT  | 0   | 10 | RDR2-sensitive |
| CTGTAGGACCTGGGGGCAGATCGT  | 0   | 12 | RDR2-sensitive |
| CTGTAGGCTGATCGGTCGGAAGGA  | 0   | 11 | RDR2-sensitive |
| CTGTAGGTAGGACGTGGACACGGA  | 15  | 0  | RDR2-resistant |
| CTGTAGTACCTATGCATGTTGACG  | 195 | 0  | RDR2-resistant |
| CTGTATACGTAGGGACGGATCCAG  | 2   | 15 | RDR2-sensitive |
| CTGTATATTGAAATACAGTCGGAC  | 0   | 10 | RDR2-sensitive |
| CTGTATCAAGGACTATGACGTCAT  | 0   | 14 | RDR2-sensitive |
| CTGTATCGCGGACTCCAAACGGAT  | 0   | 11 | RDR2-sensitive |
| CTGTATCGGTTGAAACGGACGATT  | 0   | 10 | RDR2-sensitive |
| CTGTATCTATCGGCTTATTTACAT  | 24  | 1  | RDR2-resistant |
| CTGTATCTCGGATTTCCGGCACGG  | 0   | 23 | RDR2-sensitive |
| CTGTATCTGGACGCGCAGGCTCGG  | 0   | 9  | RDR2-sensitive |
| CTGTATGACGGACAGACAGGACAA  | 0   | 13 | RDR2-sensitive |
| CTGTATGAGTAGGGACGCAGGGAC  | 0   | 10 | RDR2-sensitive |
| CTGTATGCACTCAGGGGCGGAGAG  | 0   | 10 | RDR2-sensitive |
| CTGTATGCACTCAGGGGCGGAGGG  | 0   | 35 | RDR2-sensitive |
| CTGTATGCACTCGGTCGTCTTGAC  | 0   | 11 | RDR2-sensitive |
| CTGTATGCCTCCAACAAGACACGC  | 0   | 9  | RDR2-sensitive |
| CTGTATTGGCGTAGAGGGCTTCAC  | 0   | 12 | RDR2-sensitive |
| CTGTATTTTCGTCGGCAGGCCAC   | 0   | 9  | RDR2-sensitive |



|                             |    |     |                |
|-----------------------------|----|-----|----------------|
| CTGTCACGTAGGACAGTTCGGCAA    | 1  | 24  | RDR2-sensitive |
| CTGTCACGTGACCCGAACCGGCAC    | 0  | 36  | RDR2-sensitive |
| CTGTCAGACCAGCGGCTGCAGCGA    | 0  | 16  | RDR2-sensitive |
| CTGTCAGACTGGCCAGTGGAGCGG    | 5  | 59  | RDR2-sensitive |
| CTGTCAGACTGGTCAGTGGAGCGG    | 0  | 34  | RDR2-sensitive |
| CTGTCAGCAGTAGAGGCGCAAGAA    | 2  | 43  | RDR2-sensitive |
| CTGTCAGCAGTAGAGGCGCGAGAA    | 0  | 20  | RDR2-sensitive |
| CTGTCAGCAGTAGAGGCGTAAGAA    | 0  | 10  | RDR2-sensitive |
| CTGTCAGGCTACAAGGGTAGACAG    | 0  | 10  | RDR2-sensitive |
| CTGTCAGGTCCCCTACGGCTCCAG    | 0  | 9   | RDR2-sensitive |
| CTGTCAGGTCGGTCAGTGGAGCGG    | 0  | 11  | RDR2-sensitive |
| CTGTCAGTTGTAGACGGCTGCTGA    | 0  | 10  | RDR2-sensitive |
| CTGTCCAAGCAGAACTGTCCACAC    | 0  | 13  | RDR2-sensitive |
| CTGTCCACTCTGCAACGGCCCAAC    | 6  | 29  | RDR2-sensitive |
| CTGTCCAGCGACCAGACCTCGGA     | 0  | 14  | RDR2-sensitive |
| CTGTCCGAGACGGTAGGAAAACGG    | 0  | 20  | RDR2-sensitive |
| CTGTCCGGTGAACCAGCAGAGCAA    | 2  | 19  | RDR2-sensitive |
| CTGTGCGACTGAAGGGCGCGCTCA    | 0  | 14  | RDR2-sensitive |
| CTGTGCGACTGGAGGACGTGCGTCA   | 0  | 12  | RDR2-sensitive |
| CTGTGCGAGCTGAACGAACACGGGT   | 0  | 9   | RDR2-sensitive |
| CTGTGCGAGCTTTGGAGGTGGTGGC   | 0  | 21  | RDR2-sensitive |
| CTGTGCGAGTGGCACTGGTACGGTC   | 0  | 12  | RDR2-sensitive |
| CTGTGCGAAGCTCGTTGGTCACAG    | 0  | 18  | RDR2-sensitive |
| CTGTGCGGGCTGGGACAAGGCAT     | 0  | 68  | RDR2-sensitive |
| CTGTGCGGTAGAACAGTTCGGCAA    | 0  | 20  | RDR2-sensitive |
| CTGTGCGGTAGGACAATTCGGCTA    | 0  | 27  | RDR2-sensitive |
| CTGTGCGGTAGGACAATTCGGCTT    | 0  | 21  | RDR2-sensitive |
| CTGTGCGGTAGGACAGTTCGGCAA    | 7  | 547 | RDR2-sensitive |
| CTGTGCGGTAGGACAGTTCGGCAC    | 0  | 13  | RDR2-sensitive |
| CTGTGCGGTAGGACAGTTCGGCAT    | 2  | 27  | RDR2-sensitive |
| CTGTGCGGTAGGACAGTTCGGCCA    | 0  | 15  | RDR2-sensitive |
| CTGTGCGGTAGGACAGTTCGGCGA    | 0  | 12  | RDR2-sensitive |
| CTGTGCGGTAGGACAGTTCGGCTA    | 9  | 501 | RDR2-sensitive |
| CTGTGCGGTAGGACAGTTCGGCTC    | 1  | 28  | RDR2-sensitive |
| CTGTGCGGTAGGACAGTTCGGCTT    | 3  | 352 | RDR2-sensitive |
| CTGTGCGGTAGGATAGTTCGGCAA    | 0  | 36  | RDR2-sensitive |
| CTGTGCGGGCGGCCACCAAGACAGC   | 53 | 8   | RDR2-resistant |
| CTGTGCGTATTGGACTTGATGGCTT   | 0  | 9   | RDR2-sensitive |
| CTGTGCGTATTGTACTIONGGATGGTT | 0  | 11  | RDR2-sensitive |
| CTGTGCGTGACTTTCCCAACCGGAT   | 0  | 11  | RDR2-sensitive |
| CTGTGCGTGCTTATGGGAAGGGAGA   | 3  | 70  | RDR2-sensitive |
| CTGTGCGTGTGGACTTAGGTGGTT    | 0  | 14  | RDR2-sensitive |
| CTGTCTATAGCACTGGAAGGGCAC    | 0  | 11  | RDR2-sensitive |
| CTGTCTGACCAGACGAACGGACGG    | 0  | 16  | RDR2-sensitive |
| CTGTCTGACTGAGGCATCGTCACT    | 0  | 11  | RDR2-sensitive |
| CTGTCTGAGCAGAGGCTGAAGCAG    | 1  | 40  | RDR2-sensitive |
| CTGTCTGAGCCAGAACCCGCGCAC    | 0  | 9   | RDR2-sensitive |
| CTGTCTGTCCGAGATGGGCCGCAT    | 0  | 14  | RDR2-sensitive |
| CTGTCTGTCCGGAGATGAGCAGAA    | 0  | 11  | RDR2-sensitive |

|                           |    |     |                |
|---------------------------|----|-----|----------------|
| CTGTCTTCGGGCTGTGCTAGTCGG  | 0  | 15  | RDR2-sensitive |
| CTGTCTTGCGGATTTACTCGACGG  | 0  | 12  | RDR2-sensitive |
| CTGTCTTGTAGAAGGGGTATGAAA  | 0  | 11  | RDR2-sensitive |
| CTGTGACTAGCAGAGCAGCCCCAT  | 0  | 9   | RDR2-sensitive |
| CTGTGACTCGGCGAGCTGGGCAGA  | 0  | 9   | RDR2-sensitive |
| CTGTGAGAACGACACGAAGCCTGC  | 0  | 16  | RDR2-sensitive |
| CTGTGAGAGCGGGATTGGAACGGA  | 0  | 16  | RDR2-sensitive |
| CTGTGATTAGATCGGATCAGGTAT  | 0  | 23  | RDR2-sensitive |
| CTGTGCACTGGAGCAGCAGGGACG  | 1  | 14  | RDR2-sensitive |
| CTGTGCACTGGAGCAGCAGGGGCG  | 0  | 23  | RDR2-sensitive |
| CTGTGCAGAGAGCACCCGCCCGG   | 0  | 15  | RDR2-sensitive |
| CTGTGCATCCTATAGCGGCTACAG  | 0  | 9   | RDR2-sensitive |
| CTGTGCGGACGATTGCTTGACAGGC | 0  | 9   | RDR2-sensitive |
| CTGTGCTCGCAGAAGGTGGGACGG  | 1  | 19  | RDR2-sensitive |
| CTGTGCTCGTAGAAGGTGGGACGG  | 0  | 18  | RDR2-sensitive |
| CTGTGGAAAAGCTGCTGTAGGCT   | 0  | 24  | RDR2-sensitive |
| CTGTGGAGCAAGGAAGCGAACGCA  | 0  | 15  | RDR2-sensitive |
| CTGTGGAGCCAGGCTCTGGAGATG  | 0  | 14  | RDR2-sensitive |
| CTGTGGATATGGACCGGAAGGTAC  | 0  | 18  | RDR2-sensitive |
| CTGTGGCACTGAACCTGAGATCGA  | 0  | 37  | RDR2-sensitive |
| CTGTGGCTGAAAAGTGTGGCGCGG  | 0  | 10  | RDR2-sensitive |
| CTGTGGCTTAGGGTCGGGCAGTCT  | 0  | 11  | RDR2-sensitive |
| CTGTGGGCCGACTGTCCGCGCGT   | 0  | 12  | RDR2-sensitive |
| CTGTGGGTCTATACCGTGTCCGGC  | 0  | 16  | RDR2-sensitive |
| CTGTGGGTCTTGTGCGAGTCGGATA | 0  | 11  | RDR2-sensitive |
| CTGTGGTCTAGACTGTATGGCGTA  | 0  | 12  | RDR2-sensitive |
| CTGTGGTGTAGTGCTAAACGGGCT  | 0  | 17  | RDR2-sensitive |
| CTGTGTAGAGGCTAACCAGACCGC  | 0  | 13  | RDR2-sensitive |
| CTGTGTAGAGGCTAACCAGACCGC  | 0  | 48  | RDR2-sensitive |
| CTGTGTAGCGGAGAACAAGATGTC  | 21 | 2   | RDR2-resistant |
| CTGTGTAGGGATAATCTGGGACGG  | 0  | 14  | RDR2-sensitive |
| CTGTGTATCCCTGTAGAGTACGGA  | 0  | 12  | RDR2-sensitive |
| CTGTGTGTTGACTGTATTTAGGTT  | 0  | 15  | RDR2-sensitive |
| CTGTGTTCTCTGACTGAACGACAT  | 0  | 15  | RDR2-sensitive |
| CTGTGTTTGTAAGCTGGAACGGA   | 1  | 14  | RDR2-sensitive |
| CTGTGTTTGTAATCTGGAACGGA   | 2  | 128 | RDR2-sensitive |
| CTGTTAGTCGTGCCGGGCCGGCCC  | 1  | 26  | RDR2-sensitive |
| CTGTTATGAGATGGAGGACGACAT  | 1  | 19  | RDR2-sensitive |
| CTGTTACCGGAGGCTGGCCTGGC   | 0  | 16  | RDR2-sensitive |
| CTGTTACGGCACTTGCTGGCACT   | 97 | 5   | RDR2-resistant |
| CTGTTACGTCGGCACCAAGGCTGC  | 16 | 0   | RDR2-resistant |
| CTGTTCACTGTAAGACATTGGCAT  | 0  | 9   | RDR2-sensitive |
| CTGTTTACTGCTGTAGAGGCTACAG | 0  | 13  | RDR2-sensitive |
| CTGTTTACTGTTGTAGAGGCTACAG | 0  | 9   | RDR2-sensitive |
| CTGTTCCACGACGAAGACTGCGCC  | 60 | 2   | RDR2-resistant |
| CTGTTCCATGTAGCGGCGCTCTGC  | 0  | 10  | RDR2-sensitive |
| CTGTTCCCTCGTCAAGCTCGGGCAT | 0  | 23  | RDR2-sensitive |
| CTGTTCCGAACCAGAATTGAGCGGC | 0  | 9   | RDR2-sensitive |
| CTGTTCCGTTGACTGTGTGATGGA  | 0  | 10  | RDR2-sensitive |

|                           |     |    |                |
|---------------------------|-----|----|----------------|
| CTGTTTCGTTGCCGGAGAAGGACAC | 0   | 38 | RDR2-sensitive |
| CTGTTTCGTTGGTGAACGACGGGC  | 175 | 7  | RDR2-resistant |
| CTGTTCTGGAGACGCAGGCCGACAG | 0   | 16 | RDR2-sensitive |
| CTGTTCTTCTTCTGTAGGGGGTGT  | 0   | 10 | RDR2-sensitive |
| CTGTTGACTCGGGCCGTGCCGGTT  | 0   | 25 | RDR2-sensitive |
| CTGTTGCAACGTACGGGTACTION  | 0   | 9  | RDR2-sensitive |
| CTGTTGCATCGGGCTGTGCCGGTT  | 3   | 28 | RDR2-sensitive |
| CTGTTGCCCTCGGCCTGGAACGGT  | 0   | 16 | RDR2-sensitive |
| CTGTTGGAGAGCGTAGAAGACCAT  | 0   | 10 | RDR2-sensitive |
| CTGTTGGAGCGAAGGCAAAGACGC  | 0   | 23 | RDR2-sensitive |
| CTGTTGGAGGGAAGGCGAAGACGC  | 0   | 12 | RDR2-sensitive |
| CTGTTGGAGTGAATGAAGATGGTG  | 0   | 10 | RDR2-sensitive |
| CTGTTGGATTCATCTGACGGCGC   | 0   | 10 | RDR2-sensitive |
| CTGTTGGCGTGTAGAGGACGAGAA  | 0   | 10 | RDR2-sensitive |
| CTGTTGGCTGTGCTGAATACGGAT  | 0   | 9  | RDR2-sensitive |
| CTGTTGGGCTGCTCCATACGGTAA  | 0   | 22 | RDR2-sensitive |
| CTGTTGGGCTGCTCTATACGGTAA  | 0   | 34 | RDR2-sensitive |
| CTGTTGGGGCGAAGGCAAAGACGC  | 3   | 34 | RDR2-sensitive |
| CTGTTGGGGCGAAGGCAAAGACGT  | 0   | 14 | RDR2-sensitive |
| CTGTTGGGGCGAAGGCGAAGACGC  | 0   | 17 | RDR2-sensitive |
| CTGTTGGGGCGAAGGCGAAGACGT  | 0   | 9  | RDR2-sensitive |
| CTGTTGGTTCGGGCCAGTGGTCGG  | 0   | 9  | RDR2-sensitive |
| CTGTTGTGTTCTGTATGCGTTGGC  | 163 | 5  | RDR2-resistant |
| CTGTTTAGTCAGGCTGATGCACGG  | 0   | 35 | RDR2-sensitive |
| CTGTTTATCGGTTGGGCTGGCGGG  | 17  | 1  | RDR2-resistant |
| CTGTTTGAACGTGGCACGGCATG   | 0   | 15 | RDR2-sensitive |
| CTGTTTGACTIONCTATTGGATGG  | 0   | 15 | RDR2-sensitive |
| CTGTTTGACTIONGACCTGCAACGG | 0   | 10 | RDR2-sensitive |
| CTGTTTGCAGCTGAGAGCCTAGGC  | 1   | 22 | RDR2-sensitive |
| CTGTTTGGACGCGGGCGCCGGCGC  | 0   | 9  | RDR2-sensitive |
| CTGTTTGGCACGGCTCCTCTAGAT  | 0   | 11 | RDR2-sensitive |
| CTGTTTGGCTACTCTGTTGGATGG  | 0   | 28 | RDR2-sensitive |
| CTGTTTTCGACGGTCTCTGACGGC  | 0   | 33 | RDR2-sensitive |
| CTGTTTTGGAGACGCATCTGACAG  | 0   | 14 | RDR2-sensitive |
| CTGTTTTGTTAAGGGTCACGGCA   | 24  | 0  | RDR2-resistant |
| CTTAAAAACACTCGGCAAAGGCTT  | 0   | 9  | RDR2-sensitive |
| CTTAAAACCTTTTTAAGGACTGGA  | 20  | 2  | RDR2-resistant |
| CTTAAAGTCCGGGCTGTGAGAGGA  | 0   | 9  | RDR2-sensitive |
| CTTAAAGTTGGGTTTTGTTTTGGAC | 24  | 2  | RDR2-resistant |
| CTTAACGGGCTTAGAGGTAACCGG  | 0   | 17 | RDR2-sensitive |
| CTTAACGTTGACACTGCGGACGGT  | 0   | 60 | RDR2-sensitive |
| CTTAACTCGTTAAGTTGGACGGTT  | 0   | 15 | RDR2-sensitive |
| CTTAACTGAGTAGAACTGACGGTC  | 0   | 16 | RDR2-sensitive |
| CTTAATAGTTGTAGAGATGACGAC  | 0   | 13 | RDR2-sensitive |
| CTTAATCGACACGACTCTCGGCAA  | 3   | 50 | RDR2-sensitive |
| CTTACACTGTTGGAGGCTCGTCAA  | 0   | 16 | RDR2-sensitive |
| CTTACATTGTAGACCGTACGGTTC  | 0   | 10 | RDR2-sensitive |
| CTTACCACGGTGTGACTCGGTAT   | 0   | 15 | RDR2-sensitive |
| CTTACCGAGTAGAGCTTGCGGGT   | 0   | 9  | RDR2-sensitive |

|                           |     |    |                |
|---------------------------|-----|----|----------------|
| CTTACCTTCTAGTGGACTCGGGGA  | 0   | 30 | RDR2-sensitive |
| CTTACGGAAGCAAGAGGACGTCAG  | 1   | 31 | RDR2-sensitive |
| CTTACGGAAGCAGGACAACGTCAG  | 1   | 17 | RDR2-sensitive |
| CTTACGGAAGCAGGACGACGTCAG  | 0   | 13 | RDR2-sensitive |
| CTTACTCCGATTATTCAAGGACTG  | 14  | 0  | RDR2-resistant |
| CTTACTGACGCGCGGAACGACGAC  | 0   | 9  | RDR2-sensitive |
| CTTACTGATAGACTGTCATCTAAA  | 34  | 0  | RDR2-resistant |
| CTTACTGGACGCCTAGAGGACGCG  | 0   | 31 | RDR2-sensitive |
| CTTACTGGACGTGTAGAGGACGTA  | 0   | 59 | RDR2-sensitive |
| CTTACTTTGATATTGTTGGCACTG  | 14  | 0  | RDR2-resistant |
| CTTAGGACGGCAGTAGAGATGGCA  | 1   | 26 | RDR2-sensitive |
| CTTAGGATTTAGGGCGGGTGCATT  | 1   | 13 | RDR2-sensitive |
| CTTAGGCACTTGTGTTGGACACTA  | 1   | 22 | RDR2-sensitive |
| CTTAGGCACTTGTGTTGGACACTT  | 0   | 13 | RDR2-sensitive |
| CTTAGGCCAGGCTCTGCAGACGCG  | 0   | 14 | RDR2-sensitive |
| CTTAGGTACTACTACCGTGTCCGGC | 0   | 11 | RDR2-sensitive |
| CTTAGGTGGACTGGACAGCATGAT  | 0   | 10 | RDR2-sensitive |
| CTTATATGTCGGCTGTAGGGGCAT  | 2   | 25 | RDR2-sensitive |
| CTTATCGTATTAGAAACGTCGGTA  | 0   | 27 | RDR2-sensitive |
| CTTATCGTATTAGGAACGTGGGTA  | 0   | 15 | RDR2-sensitive |
| CTTATCTCCGACGGCTACCCTGAC  | 1   | 18 | RDR2-sensitive |
| CTTATGGTCCGACTGTACCGGTAC  | 1   | 53 | RDR2-sensitive |
| CTTATGTAAGCTGGGGATGAGCAT  | 0   | 21 | RDR2-sensitive |
| CTTATGTACGTTGGGGATGAGCAT  | 1   | 27 | RDR2-sensitive |
| CTTATTCTTACCGTCGTCGTTAC   | 0   | 10 | RDR2-sensitive |
| CTTATTTGGTCTCTGTATGATGGA  | 0   | 23 | RDR2-sensitive |
| CTTATTTTCGGCGGCTATTTTCGT  | 0   | 16 | RDR2-sensitive |
| CTTCAAGTCGCGTCCTTAGGGCAT  | 0   | 9  | RDR2-sensitive |
| CTTCAAGTTGAATTCGGTCTCGGT  | 2   | 19 | RDR2-sensitive |
| CTTCACCAAGGGGCTATCGTCGAG  | 0   | 9  | RDR2-sensitive |
| CTTCACGGAGAGACGGCTCTAAGA  | 0   | 14 | RDR2-sensitive |
| CTTCACGGGAGGGAGGACCATCAC  | 102 | 19 | RDR2-resistant |
| CTTCACTGTAGCGATGTCAGGCGC  | 0   | 11 | RDR2-sensitive |
| CTTCACTTGGATCATGTGGAAGAC  | 0   | 10 | RDR2-sensitive |
| CTTCAGACGACTCGAACGGCGCCT  | 0   | 13 | RDR2-sensitive |
| CTTCAGACGTAGGGCGGCTATCCC  | 0   | 29 | RDR2-sensitive |
| CTTCAGCTGGCTGTAGCGGGGGCT  | 0   | 14 | RDR2-sensitive |
| CTTCAGGACACTCGGCATCACCAC  | 0   | 9  | RDR2-sensitive |
| CTTCAGGCGGGTCGGATACGGATA  | 0   | 24 | RDR2-sensitive |
| CTTCAGGCGGGTCGGATACGGATC  | 0   | 10 | RDR2-sensitive |
| CTTCAGGCTCCACGAATTCGGCAA  | 0   | 9  | RDR2-sensitive |
| CTTCAGGCTCTACGAATCCGGCAA  | 0   | 17 | RDR2-sensitive |
| CTTCAGTCGTGACAAC TTGGCGGA | 0   | 12 | RDR2-sensitive |
| CTTCATACTGTAGAAGAGGGTACC  | 0   | 83 | RDR2-sensitive |
| CTTCATACTGTAGTAAGGGGTACC  | 1   | 34 | RDR2-sensitive |
| CTTCATCCATCGGGCTTCGTGCGT  | 0   | 11 | RDR2-sensitive |
| CTTCATCGCAGGGACGGGAATGAG  | 0   | 9  | RDR2-sensitive |
| CTTCATCTTCATCGTCTGCAGGCA  | 17  | 0  | RDR2-resistant |
| CTTCATGCTGTAGAAGAGGGCACC  | 0   | 11 | RDR2-sensitive |

|                           |    |     |                |
|---------------------------|----|-----|----------------|
| CTTCATGCTGTAGAAGAGGGTACC  | 0  | 21  | RDR2-sensitive |
| CTTCATGCTGTAGAAGATGGTACC  | 0  | 26  | RDR2-sensitive |
| CTTCATGCTGTAGGAGAGGGTACC  | 0  | 11  | RDR2-sensitive |
| CTTCATTGGCTGTATTATAGTGGA  | 17 | 1   | RDR2-resistant |
| CTTCCAAGGTTTCGTAGAGCAGGA  | 0  | 10  | RDR2-sensitive |
| CTTCCATCAGAACTCCATCCGGCT  | 0  | 10  | RDR2-sensitive |
| CTTCCCAACGGGCGGCGTGCTGAA  | 79 | 8   | RDR2-resistant |
| CTTCCCCTCAGCAGTAGAGACGCA  | 0  | 11  | RDR2-sensitive |
| CTTCCCTCCCCTCAGCAGTAGAGG  | 0  | 16  | RDR2-sensitive |
| CTTCCGGAGGGTTGTTGGATGCCG  | 0  | 15  | RDR2-sensitive |
| CTTCCGGATTGCTCTCAACGGCT   | 33 | 3   | RDR2-resistant |
| CTTCCGGCAGGTGTGGGACGTGCT  | 0  | 15  | RDR2-sensitive |
| CTTCCGTCAGCAGTAGAGGCCGAA  | 1  | 115 | RDR2-sensitive |
| CTTCCTCTAGACGGCTCTTGCAA   | 0  | 9   | RDR2-sensitive |
| CTTCCTCTGGACCTGTTGATGGAT  | 0  | 14  | RDR2-sensitive |
| CTTCCTCTGGTATCACGATTGCCG  | 15 | 0   | RDR2-resistant |
| CTTCCTGCAGGACCTTCGGCGACG  | 2  | 28  | RDR2-sensitive |
| CTTCCTGTGGCTAATTGTGACGGT  | 0  | 9   | RDR2-sensitive |
| CTTCCTGTTCTTGAGCGTCGGCAC  | 0  | 16  | RDR2-sensitive |
| CTTCGACGAGACGAACGCAGCGGT  | 1  | 22  | RDR2-sensitive |
| CTTCGACGATTTGGAGGCGTAGGC  | 0  | 13  | RDR2-sensitive |
| CTTCGACGTTTTGGAGGCGTAGGC  | 0  | 10  | RDR2-sensitive |
| CTTCGATCGAGCAGCTGACGAGTA  | 1  | 41  | RDR2-sensitive |
| CTTCGCACGTGTGGACCGTTCGAC  | 1  | 16  | RDR2-sensitive |
| CTTCGCCGCTCCACTGACCGCCT   | 0  | 18  | RDR2-sensitive |
| CTTCGCGGGCGAGAGTGGAGGCGA  | 1  | 15  | RDR2-sensitive |
| CTTCGCGTGACCTGGAGACGTCGT  | 0  | 9   | RDR2-sensitive |
| CTTCGCTACTGTAGCAGACGGTTT  | 1  | 22  | RDR2-sensitive |
| CTTCGCTAGTTGGGCCTGACGGAC  | 0  | 12  | RDR2-sensitive |
| CTTCGCTATCGCGGACTGTTCCGGC | 0  | 10  | RDR2-sensitive |
| CTTCGCTATCTGGACCTGACGGGC  | 0  | 24  | RDR2-sensitive |
| CTTCGGACGGTCGGATGGTCGGAT  | 0  | 11  | RDR2-sensitive |
| CTTCGGACTCAAGTCAGGCATCAC  | 1  | 12  | RDR2-sensitive |
| CTTCGGACTGGAAGGGTAGGCAGC  | 0  | 16  | RDR2-sensitive |
| CTTCGGAGTTTGAAGCTAGAGGTG  | 14 | 0   | RDR2-resistant |
| CTTCGGATTCGGGTCGGATACGGA  | 0  | 61  | RDR2-sensitive |
| CTTCGGCACTCGGCAAAGGCACGG  | 0  | 13  | RDR2-sensitive |
| CTTCGGCGACGAAGCATAGACCCA  | 0  | 10  | RDR2-sensitive |
| CTTCGGCTACAGCAGGCACCCCGC  | 0  | 9   | RDR2-sensitive |
| CTTCGGCTACGAAGCATACCCCCA  | 0  | 9   | RDR2-sensitive |
| CTTCGGGACCGTAGCGTTGGGCTA  | 0  | 18  | RDR2-sensitive |
| CTTCGGGCAAAGGATGGCATGGCT  | 0  | 13  | RDR2-sensitive |
| CTTCGGGCTGGCACGGTATGACCC  | 0  | 10  | RDR2-sensitive |
| CTTCGGGTAGACGAAGTCTTGCT   | 0  | 9   | RDR2-sensitive |
| CTTCGGTAAGTAGGGGATCGACAT  | 0  | 12  | RDR2-sensitive |
| CTTCGGTCCTGAGAGAAGGTAGAA  | 0  | 11  | RDR2-sensitive |
| CTTCGTACGAGCAGCTGGGTTGGA  | 22 | 0   | RDR2-resistant |
| CTTCGTCAAGCCGGCAGGTCCTCC  | 0  | 14  | RDR2-sensitive |
| CTTCGTCAGGACACACATGGAGGC  | 0  | 22  | RDR2-sensitive |

|                           |    |    |                |
|---------------------------|----|----|----------------|
| CTTCGTCCATCGGGCTTCGCGCGT  | 0  | 22 | RDR2-sensitive |
| CTTCGTCCCACCGCAGAGGTGCA   | 0  | 37 | RDR2-sensitive |
| CTTCGTCCCGATCGTAGAGGTGCA  | 0  | 14 | RDR2-sensitive |
| CTTCGTGATGACAGCACGGTCTC   | 0  | 21 | RDR2-sensitive |
| CTTCGTGTCCTTCTCCGGCAA     | 0  | 34 | RDR2-sensitive |
| CTTCGTCTTGTAGTGTAGAGGACG  | 0  | 9  | RDR2-sensitive |
| CTTCGTGTAGGACCTTCGGCGCAA  | 0  | 12 | RDR2-sensitive |
| CTTCGTTCTTAGGCTCAGCGGCAA  | 24 | 3  | RDR2-resistant |
| CTTCTAGGTAGGGCTGGACGTGGC  | 0  | 12 | RDR2-sensitive |
| CTTCTAGTAACAATTGTAGTCGGG  | 1  | 17 | RDR2-sensitive |
| CTTCTAGTTAGAACGTCGTTGCTC  | 29 | 5  | RDR2-resistant |
| CTTCTATGTTTAGAGTTCGTCGTA  | 0  | 30 | RDR2-sensitive |
| CTTCTCAAGATCGACAGCCGGCAC  | 0  | 12 | RDR2-sensitive |
| CTTCTCAGTGCTGAAGCCGGACGG  | 1  | 14 | RDR2-sensitive |
| CTTCTCCGTCGAGGCCGAAGACAC  | 0  | 12 | RDR2-sensitive |
| CTTCTCGTTGTGGGCTGCAAGCGG  | 0  | 21 | RDR2-sensitive |
| CTTCTCTCAGGACCGAAGGTACAT  | 0  | 13 | RDR2-sensitive |
| CTTCTCTGCACGCTTCCGGACGGT  | 0  | 22 | RDR2-sensitive |
| CTTCTCTGCACGGCGCTGGACGGT  | 0  | 9  | RDR2-sensitive |
| CTTCTCTGCGTACATCCGGACGGT  | 1  | 13 | RDR2-sensitive |
| CTTCTCTGCGTATGTCTGGACGGT  | 0  | 17 | RDR2-sensitive |
| CTTCTCTGGACACGTGGCGGCTTC  | 0  | 13 | RDR2-sensitive |
| CTTCTCTGTGTATGTCCGGACGGT  | 0  | 9  | RDR2-sensitive |
| CTTCTGACATGTGGGCCACCGGAC  | 0  | 12 | RDR2-sensitive |
| CTTCTGACGTGTTGCTGAAATGGA  | 0  | 16 | RDR2-sensitive |
| CTTCTGCCGGAAGAGGAGGGCGC   | 0  | 11 | RDR2-sensitive |
| CTTCTGCTCTGAGCCGGTTTGCAT  | 0  | 9  | RDR2-sensitive |
| CTTCTGTAGCTGTTGGGAGGCCGG  | 0  | 16 | RDR2-sensitive |
| CTTCTGTCAGACCGGTCAGTGGAG  | 0  | 10 | RDR2-sensitive |
| CTTCTGTCAGACTGGCCAGTGGAG  | 1  | 17 | RDR2-sensitive |
| CTTCTGTGACTGGCGCACCGGAC   | 0  | 13 | RDR2-sensitive |
| CTTCTGTGGCACTCGGCAAAGAGG  | 1  | 16 | RDR2-sensitive |
| CTTCTGTTCCGGAATAATCTACGGT | 0  | 9  | RDR2-sensitive |
| CTTCTGTTGACTGTTGTTGCGGAC  | 0  | 21 | RDR2-sensitive |
| CTTCTTACCTTCTAGTGGACTCGG  | 0  | 14 | RDR2-sensitive |
| CTTGAACATGGTTCGACGGCGAGGC | 1  | 32 | RDR2-sensitive |
| CTTGAACATGGTTCGACGGCGAGGT | 1  | 26 | RDR2-sensitive |
| CTTGAAGTGGGCTACTTCGGACAA  | 0  | 11 | RDR2-sensitive |
| CTTGACGAACTGTATATTGGCAAC  | 0  | 9  | RDR2-sensitive |
| CTTGACGACACGCGGAACGACGAC  | 1  | 28 | RDR2-sensitive |
| CTTGACGACGCACAGAATGACGAT  | 0  | 16 | RDR2-sensitive |
| CTTGACGACGCACGGAATGACGAC  | 0  | 14 | RDR2-sensitive |
| CTTGACGACTGTACAGATTGCGTC  | 0  | 34 | RDR2-sensitive |
| CTTGACGATGCACGGAACGACGAC  | 0  | 17 | RDR2-sensitive |
| CTTGACGTGTAGAGGACGAGAATC  | 0  | 9  | RDR2-sensitive |
| CTTGACTATTGACTAGGCGAGAC   | 19 | 0  | RDR2-resistant |
| CTTGACTGGGACGGCGATCACGAC  | 0  | 10 | RDR2-sensitive |
| CTTGACTTGAGGGCCGGACACGAC  | 0  | 13 | RDR2-sensitive |
| CTTGAGAGCCTGGCTGAGATGAGC  | 0  | 11 | RDR2-sensitive |

|                            |   |     |                |
|----------------------------|---|-----|----------------|
| CTTGAGCCCTGTAGAAGCACAGCT   | 0 | 27  | RDR2-sensitive |
| CTTGAGCCCTGTAGAAGCGTAGCT   | 0 | 11  | RDR2-sensitive |
| CTTGATCCGGACACTGAAGAGGAG   | 0 | 13  | RDR2-sensitive |
| CTTGATCTGGGGAGCGGCGTGGCA   | 0 | 10  | RDR2-sensitive |
| CTTGATCTGTCAAGGCTGTCACGG   | 0 | 10  | RDR2-sensitive |
| CTTGATGACACGCGGAACGACGAT   | 0 | 28  | RDR2-sensitive |
| CTTGATGACGCACGGAACGACGAC   | 1 | 141 | RDR2-sensitive |
| CTTGATGACGCACGGAATGACGAC   | 2 | 16  | RDR2-sensitive |
| CTTGATGACGCACGGATCGACGAC   | 1 | 17  | RDR2-sensitive |
| CTTGATGACGCGCGGAACGACGAC   | 0 | 34  | RDR2-sensitive |
| CTTGATGACGCGCGGAATGACGAC   | 1 | 20  | RDR2-sensitive |
| CTTGATGACGTACGGAACGACGAC   | 1 | 32  | RDR2-sensitive |
| CTTGATGACGTGCGGAACGACGAC   | 0 | 11  | RDR2-sensitive |
| CTTGATGACTCGCAGAACGACGAC   | 0 | 13  | RDR2-sensitive |
| CTTGATGATGCACGGAACGACGAC   | 0 | 12  | RDR2-sensitive |
| CTTGACACAGAAGGACTGCTTGCAT  | 0 | 29  | RDR2-sensitive |
| CTTGACAGGAGCTAGGAACATGCAA  | 1 | 22  | RDR2-sensitive |
| CTTGACAGTAGGGGGTTACAAGCGT  | 0 | 21  | RDR2-sensitive |
| CTTGACATCGTTGTGGCCTGGCCCA  | 0 | 24  | RDR2-sensitive |
| CTTGACATGCTGACTGTAGGAGGCA  | 0 | 12  | RDR2-sensitive |
| CTTGACATGTCGGCTGTAGGAGGCA  | 0 | 10  | RDR2-sensitive |
| CTTGACATGTCGGCTGTAGGGGCAC  | 0 | 81  | RDR2-sensitive |
| CTTGACATGTCGGCTGTAGGGGCC   | 0 | 13  | RDR2-sensitive |
| CTTGACATGTCGGCTGTAGGGGGCA  | 0 | 32  | RDR2-sensitive |
| CTTGACCTTCTGTCTGTCGGGCGCAC | 7 | 103 | RDR2-sensitive |
| CTTGACCTTCTGTCTGTCGGGGGCAC | 0 | 12  | RDR2-sensitive |
| CTTGACCTTCTGTCTGTCGGGTGCAC | 5 | 24  | RDR2-sensitive |
| CTTGACGATCCGACTACGACGAGCA  | 1 | 21  | RDR2-sensitive |
| CTTGACGCCTCTACTGCTGACGGGA  | 1 | 34  | RDR2-sensitive |
| CTTGACGCTCTACTGCTGACGGGA   | 0 | 30  | RDR2-sensitive |
| CTTGACTCGACGAGGACTTGGTCTGT | 0 | 10  | RDR2-sensitive |
| CTTGACTCGAGCTGTGGGTCGTGAC  | 3 | 27  | RDR2-sensitive |
| CTTGACTCGGACTCGCACGCAGGCT  | 0 | 12  | RDR2-sensitive |
| CTTGACTCGGCGAGGACTTGGTCTGT | 0 | 16  | RDR2-sensitive |
| CTTGACTGACACGCGGAACGACGAC  | 0 | 28  | RDR2-sensitive |
| CTTGACTGACACGCGGAACGACGAT  | 0 | 54  | RDR2-sensitive |
| CTTGACTGACGCGCAGAACGACGAC  | 0 | 11  | RDR2-sensitive |
| CTTGACTGACGCGCGGAACGACGAC  | 5 | 290 | RDR2-sensitive |
| CTTGACTGACGCGCGGAATGACGAC  | 0 | 21  | RDR2-sensitive |
| CTTGACTGACGTATGGAACGACAAC  | 1 | 35  | RDR2-sensitive |
| CTTGACTGACGTGACTGCATAGTAA  | 0 | 16  | RDR2-sensitive |
| CTTGACTGACGTGGCTGCATAGTAA  | 0 | 19  | RDR2-sensitive |
| CTTGACTGAGGCGCGGAACGACGAC  | 0 | 17  | RDR2-sensitive |
| CTTGACTGATGCGCAGAACGACGAC  | 1 | 27  | RDR2-sensitive |
| CTTGACTGCTGCTGTAGGAGACGTG  | 0 | 10  | RDR2-sensitive |
| CTTGACTGGAGGCGAAAAGGAGCTC  | 0 | 14  | RDR2-sensitive |
| CTTGACTGGGCGTGTAGAGGACGTG  | 0 | 194 | RDR2-sensitive |
| CTTGACTTGGCGGGGACTTGGTCTGG | 0 | 12  | RDR2-sensitive |
| CTTGACTTGGCGGGGACTTGGTCTGT | 0 | 10  | RDR2-sensitive |

|                           |    |    |                |
|---------------------------|----|----|----------------|
| CTTGAAGGCTGTAGTAGGGCCAT   | 1  | 32 | RDR2-sensitive |
| CTTGGACAGGAACTAGGCACGGC   | 6  | 67 | RDR2-sensitive |
| CTTGGACAGGAACTAGGCACGGT   | 0  | 10 | RDR2-sensitive |
| CTTGGACGAACCGTGCGAGGACGT  | 0  | 10 | RDR2-sensitive |
| CTTGGACTACGGCGAACACGGACA  | 0  | 27 | RDR2-sensitive |
| CTTGGACTATCTCTCAGATGGATG  | 25 | 1  | RDR2-resistant |
| CTTGGACTTGGACTGGGAGGAGGA  | 0  | 17 | RDR2-sensitive |
| CTTGGAGCCACTGTAGAAGTGCAA  | 0  | 18 | RDR2-sensitive |
| CTTGGAGCCGGTGGAGGATGACAG  | 0  | 9  | RDR2-sensitive |
| CTTGGATCCACCACTGTATGCATG  | 0  | 10 | RDR2-sensitive |
| CTTGGATCCTGCCAGCTCGTCGT   | 0  | 9  | RDR2-sensitive |
| CTTGGATTCCGGTAGTGACGTCAT  | 0  | 23 | RDR2-sensitive |
| CTTGGATTCTGACTTAGAGGCGTT  | 40 | 2  | RDR2-resistant |
| CTTGGATTGGTTTCGGTAGACACGG | 0  | 14 | RDR2-sensitive |
| CTTGGCAGATGGGTAACATGACTT  | 0  | 16 | RDR2-sensitive |
| CTTGGCGAACTGTACATCGGCAAC  | 0  | 20 | RDR2-sensitive |
| CTTGGCGAAGACTGGGCCTCGGGC  | 4  | 37 | RDR2-sensitive |
| CTTGGCGTAGACGAGGATGACGAT  | 1  | 29 | RDR2-sensitive |
| CTTGGCGTAGAGAAGACTCGGCTC  | 0  | 35 | RDR2-sensitive |
| CTTGGCGTAGGATTCGCGGTGTC   | 0  | 14 | RDR2-sensitive |
| CTTGGGACTGAACGAGGACGCGCC  | 2  | 68 | RDR2-sensitive |
| CTTGGGATGCTTTTGTGCGGCGGA  | 0  | 9  | RDR2-sensitive |
| CTTGGGATTCTTTTGTGCGCGTGA  | 0  | 9  | RDR2-sensitive |
| CTTGGGCAGTAGGAAGGTATGTAT  | 0  | 11 | RDR2-sensitive |
| CTTGGGCCAGGCTCACCAGATACG  | 0  | 11 | RDR2-sensitive |
| CTTGGGCTCCCTGCTGCGCGGTGT  | 0  | 22 | RDR2-sensitive |
| CTTGGGCTCCCTTCTGCACGGTGT  | 0  | 10 | RDR2-sensitive |
| CTTGGGGATACACGCACGACGACG  | 0  | 9  | RDR2-sensitive |
| CTTGGGGATGCACGAACGACGACA  | 0  | 10 | RDR2-sensitive |
| CTTGGGGTAGGGTAATGATGGCGC  | 1  | 13 | RDR2-sensitive |
| CTTGGTCTTAGCTCGATATCGGCA  | 22 | 0  | RDR2-resistant |
| CTTGGTGAAGACTGGGCCTCGGGC  | 1  | 19 | RDR2-sensitive |
| CTTGGTGTAGAGGGCATACTGAAT  | 0  | 9  | RDR2-sensitive |
| CTTGTACGCAGCCTCTGTGGACGG  | 0  | 9  | RDR2-sensitive |
| CTTGTATGCTGAGGGCTAAAGGC   | 2  | 57 | RDR2-sensitive |
| CTTGTCCCATGCGGTGACGGACA   | 0  | 17 | RDR2-sensitive |
| CTTGTCCGAGTCTGTAGCGGCAT   | 0  | 13 | RDR2-sensitive |
| CTTGTCCGGTAGAGTATTCGGTGA  | 0  | 9  | RDR2-sensitive |
| CTTGTCCCTAAGGACCTCGGACAAC | 0  | 13 | RDR2-sensitive |
| CTTGTCCCTGGCTGTACGGCAACCA | 0  | 13 | RDR2-sensitive |
| CTTGTGACATACTGTTGTGGTAC   | 0  | 17 | RDR2-sensitive |
| CTTGTGAGCGGATTGACGTCATG   | 0  | 11 | RDR2-sensitive |
| CTTGTGCGGTAGGACAGTTCGGCT  | 0  | 35 | RDR2-sensitive |
| CTTGTGCGGCTACTGTTGTGGTAC  | 0  | 9  | RDR2-sensitive |
| CTTGTGCTATTGAGATTGATGGCT  | 0  | 14 | RDR2-sensitive |
| CTTGTCTCCAGATATATCGTCGTC  | 26 | 2  | RDR2-resistant |
| CTTGTCTGACGACTGGACGGTCCG  | 0  | 10 | RDR2-sensitive |
| CTTGTCTGCTGAGAGTTGGTGGTC  | 0  | 27 | RDR2-sensitive |
| CTTGTCTGGTATTGTGGCACGGTT  | 20 | 1  | RDR2-resistant |



|                           |     |     |                |
|---------------------------|-----|-----|----------------|
| CTTGTGAACCAGACTGGCCACATA  | 0   | 9   | RDR2-sensitive |
| CTTGTGCACACATGGACTGTCCGT  | 0   | 16  | RDR2-sensitive |
| CTTGTGGACCTTGATGAAGAGCGT  | 0   | 10  | RDR2-sensitive |
| CTTGTGTTGGCTGTACGCATTACC  | 0   | 14  | RDR2-sensitive |
| CTTGTTAGCTGGCTCTGAGGACGA  | 0   | 13  | RDR2-sensitive |
| CTTGTTTCAGTCTGTAATCCGTGCA | 0   | 19  | RDR2-sensitive |
| CTTGTTTCGTTTGTGCTGGATTGGT | 0   | 9   | RDR2-sensitive |
| CTTGTTGGACGGAGAAAAGGAGGTC | 0   | 9   | RDR2-sensitive |
| CTTGTTGGACGGGGAGAGGAGGTC  | 0   | 14  | RDR2-sensitive |
| CTTGTTGGACCATGCTTCGTCGC   | 0   | 9   | RDR2-sensitive |
| CTTGTTGGTTCTTTGGCATTGGA   | 18  | 0   | RDR2-resistant |
| CTTGTTTCTGTGGAGCCAGGCTGA  | 0   | 14  | RDR2-sensitive |
| CTTGTTTGGCTGGACAGATTGGCT  | 0   | 16  | RDR2-sensitive |
| CTTTACCGAGCGCAGGACGTTGCC  | 0   | 9   | RDR2-sensitive |
| CTTTAGAGGGTCTTGTTGGAGCCA  | 1   | 15  | RDR2-sensitive |
| CTTTAGCGACGGCACTTACAGCGA  | 0   | 29  | RDR2-sensitive |
| CTTTAGGCTCTACGAATTCGGCAA  | 0   | 13  | RDR2-sensitive |
| CTTTATACTGTAGTAGAGGGTACC  | 0   | 9   | RDR2-sensitive |
| CTTTATGGATCGGGAGTTATGGAC  | 150 | 0   | RDR2-resistant |
| CTTTATTGCTCTGTGTCGTTGGG   | 21  | 0   | RDR2-resistant |
| CTTTATTGTTGGGTAGACGGGTA   | 0   | 9   | RDR2-sensitive |
| CTTTCACTGTGGATAGGCGACGGA  | 0   | 10  | RDR2-sensitive |
| CTTTCATGGGACTGCACAGGAGAC  | 0   | 9   | RDR2-sensitive |
| CTTTCACAGGATGTAGACGGAA    | 0   | 36  | RDR2-sensitive |
| CTTTCACAGACTGTCGGGCCTTAG  | 0   | 9   | RDR2-sensitive |
| CTTTCGACGGGCCAGAACGGCGT   | 0   | 24  | RDR2-sensitive |
| CTTTCGTTTTGGCGTTGGCTGT    | 0   | 12  | RDR2-sensitive |
| CTTTCCTGTGGAAGCCGTCGTCGT  | 0   | 9   | RDR2-sensitive |
| CTTTCGCCGAGCACTTGGGGCATC  | 0   | 9   | RDR2-sensitive |
| CTTTCGCGTAGGACAGTTCGGCAA  | 0   | 104 | RDR2-sensitive |
| CTTTCGCGTAGGACAGTTCGGCAT  | 0   | 9   | RDR2-sensitive |
| CTTTCGCTTGTGGAAACTGGCATG  | 25  | 0   | RDR2-resistant |
| CTTTCGGGCACTCGGCAAAGACGT  | 0   | 48  | RDR2-sensitive |
| CTTTCGGTGGCCCTCTCTACGGTT  | 33  | 1   | RDR2-resistant |
| CTTTCGTCAGCTCGTAGAATGGGC  | 0   | 15  | RDR2-sensitive |
| CTTTCGTCGCAACGCACGGGCATA  | 0   | 10  | RDR2-sensitive |
| CTTTCCTAGCTCATATGGTCGGCAT | 15  | 0   | RDR2-resistant |
| CTTTCCTGCAGGACCTTCGGCGACG | 0   | 17  | RDR2-sensitive |
| CTTTCCTGTCGTCGGGTGCACCGGA | 4   | 17  | RDR2-sensitive |
| CTTTGACAGGATGTAGCAGGGAGA  | 0   | 9   | RDR2-sensitive |
| CTTTGACTGACTGTGGCGTGGCTA  | 0   | 38  | RDR2-sensitive |
| CTTTGAGAGTGTGGTTGGGCGAAT  | 2   | 28  | RDR2-sensitive |
| CTTTGCACGCGCAGAACCGAGCTC  | 1   | 34  | RDR2-sensitive |
| CTTTGCATGAGTAGAGCCGGGATG  | 0   | 42  | RDR2-sensitive |
| CTTTGCCGAGTGCCTTTTGTCTGGG | 0   | 17  | RDR2-sensitive |
| CTTTGCCGAGTGTTTTAAAGGCTT  | 0   | 9   | RDR2-sensitive |
| CTTTGCCTTCTGTCTGTCGGGCGCA | 5   | 58  | RDR2-sensitive |
| CTTTGGAAGGCTGTAGTCTGGGCCG | 0   | 11  | RDR2-sensitive |
| CTTTGGACTGGCACGACACGGCTC  | 0   | 23  | RDR2-sensitive |

|                           |     |     |                |
|---------------------------|-----|-----|----------------|
| CTTTGGACTGGCACGACGCGGCTC  | 0   | 14  | RDR2-sensitive |
| CTTTGGCCTGGAACAAACACGGAC  | 0   | 11  | RDR2-sensitive |
| CTTTGGGTAGACTGCTGCAGACGG  | 0   | 9   | RDR2-sensitive |
| CTTTGGGTGAACTGCTGGAGTCGG  | 0   | 14  | RDR2-sensitive |
| CTTTGGTTTGGATGTTTTTGGGGT  | 15  | 0   | RDR2-resistant |
| CTTTGTCGACTGTTTTTCAGGCTA  | 0   | 11  | RDR2-sensitive |
| CTTTGTCGAGTAACAGGTGACGTT  | 0   | 10  | RDR2-sensitive |
| CTTTGTCGAGTGTTTTTACGGCTT  | 0   | 11  | RDR2-sensitive |
| CTTTGTCGAGTGTTTTTACAGGCTT | 0   | 9   | RDR2-sensitive |
| CTTTGTCTCTGTCCGACCAGCGGC  | 2   | 20  | RDR2-sensitive |
| CTTTGTGCCGGCAGACTCAGAGGT  | 1   | 17  | RDR2-sensitive |
| CTTTGTGCGGAGGAAGGATGTCCA  | 0   | 9   | RDR2-sensitive |
| CTTTGTTAATAATTAGAGCCGGAC  | 0   | 11  | RDR2-sensitive |
| CTTTGTTCCGGCGGCTCGGCACCAC | 0   | 12  | RDR2-sensitive |
| CTTTGTTGGACGGAGAGAGGAGGT  | 0   | 13  | RDR2-sensitive |
| CTTTGTTGGGCTCTCCGCATGAGA  | 46  | 1   | RDR2-resistant |
| CTTTGTTTGCTCGGTACTTCGGTT  | 131 | 0   | RDR2-resistant |
| CTTTGTTTGGTTGCTTGACGGAC   | 0   | 12  | RDR2-sensitive |
| CTTTTAAACCGGACCGCCTGTGAT  | 0   | 14  | RDR2-sensitive |
| CTTTTAGAGAAGACTGTAAAAGAC  | 0   | 11  | RDR2-sensitive |
| CTTTTAGAGAAGACTGTAAAGGAC  | 0   | 44  | RDR2-sensitive |
| CTTTTAGAGCGATGTTGGATGGCA  | 19  | 0   | RDR2-resistant |
| CTTTTCATCTTTAAGTCGGTTCCC  | 1   | 14  | RDR2-sensitive |
| CTTTTCGGACTTGAACCGGGCGGC  | 0   | 15  | RDR2-sensitive |
| CTTTTCGGGCTTAGGCCAGGCCGG  | 0   | 9   | RDR2-sensitive |
| CTTTTCGGGCTTGGGCCGGGCCGG  | 1   | 32  | RDR2-sensitive |
| CTTTTCGGGCTTGGGTCGGACGGC  | 0   | 24  | RDR2-sensitive |
| CTTTTCGGTTCTGTTTTTGTGGTT  | 0   | 9   | RDR2-sensitive |
| CTTTTCGTCTGTGGAGAGGTTAG   | 1   | 61  | RDR2-sensitive |
| CTTTTCTCGGGCACTCGGCAAAGA  | 0   | 26  | RDR2-sensitive |
| CTTTTGAACTGCGCTGACGTCAT   | 0   | 53  | RDR2-sensitive |
| CTTTTGTCGCTGTAGGCACATGGC  | 1   | 37  | RDR2-sensitive |
| CTTTTGTCGGGCACTCGGCAAAGA  | 0   | 93  | RDR2-sensitive |
| CTTTTGTTAAGGGTCACGGCAAT   | 15  | 0   | RDR2-resistant |
| CTTTTAGTTGTCGCTGGATAGTT   | 2   | 46  | RDR2-sensitive |
| CTTTTAGTTGTCGTTGGATAGTT   | 0   | 12  | RDR2-sensitive |
| CTTTTATAGGACCTTCGGCGACG   | 1   | 13  | RDR2-sensitive |
| CTTTTATCGGGCACTCGGCAAAG   | 1   | 13  | RDR2-sensitive |
| CTTTTTCGCTCGGTCACGGTCACC  | 0   | 45  | RDR2-sensitive |
| CTTTTIGATCCTTCGATGTCGGCT  | 77  | 7   | RDR2-resistant |
| CTTTTTCGTGCCGGACCATGCAT   | 0   | 19  | RDR2-sensitive |
| CTTTTTTTGGTGGTCGTCTTGTT   | 18  | 0   | RDR2-resistant |
| GAAAACGTCACTGTAAATAGGTT   | 0   | 17  | RDR2-sensitive |
| GAAAACGGACGGAAACGGACGGAA  | 0   | 12  | RDR2-sensitive |
| GAAAACGGGCACGTGGAAGGGCAC  | 1   | 16  | RDR2-sensitive |
| GAAAACGGGCGAATACGGACGGAT  | 0   | 9   | RDR2-sensitive |
| GAAAACGGGCGGATACGGACGGAT  | 4   | 122 | RDR2-sensitive |
| GAAAACCTGAACGAGCCTGGCAC   | 0   | 11  | RDR2-sensitive |
| GAAAATACAGATTATTTTCGTCGG  | 0   | 9   | RDR2-sensitive |

|                           |     |    |                |
|---------------------------|-----|----|----------------|
| GAAAATAGGCTATTTTCGTCCGGTT | 1   | 18 | RDR2-sensitive |
| GAAAATATGCTATTTTCGTCCGGTT | 1   | 15 | RDR2-sensitive |
| GAAAATGTGGCTGTACGGACGCGG  | 0   | 17 | RDR2-sensitive |
| GAAAATTATCTATTTTCGTCCGGTT | 0   | 54 | RDR2-sensitive |
| GAAACACCTTCGGAAGACTGGCAC  | 0   | 21 | RDR2-sensitive |
| GAAACACGACGGATGCGGCTTCGA  | 0   | 13 | RDR2-sensitive |
| GAAACACGACGGGTACGGCTTTGA  | 0   | 9  | RDR2-sensitive |
| GAAACAGTCTGATTGTCCGGCATT  | 0   | 9  | RDR2-sensitive |
| GAAACAGTGTAGGCCGTCCGAAAC  | 0   | 10 | RDR2-sensitive |
| GAAACATTCTGGGCGACGTGGACA  | 0   | 10 | RDR2-sensitive |
| GAAACCGCATCTGAGGACATCCAT  | 0   | 10 | RDR2-sensitive |
| GAAACCGTTGGATCTAGATTGGAT  | 2   | 31 | RDR2-sensitive |
| GAAACGACTGTTGGGCTTCGGCGT  | 2   | 25 | RDR2-sensitive |
| GAAACGGACAAGGGCGTGCCACAC  | 0   | 31 | RDR2-sensitive |
| GAAACGGACCCAGGAACGTGCGGA  | 0   | 30 | RDR2-sensitive |
| GAAACGGGACGGATACGGATACAG  | 0   | 29 | RDR2-sensitive |
| GAAACTCGAGCTCGTGAGCCGGCT  | 0   | 9  | RDR2-sensitive |
| GAAACTCGGATCTGTGACGCACGG  | 1   | 21 | RDR2-sensitive |
| GAAACTGCAGCTGAAGGACGACGA  | 0   | 9  | RDR2-sensitive |
| GAAACTGGGTCAGGTCCGGGCGGCC | 0   | 11 | RDR2-sensitive |
| GAAACTGTAGCAATGCATGTGCAT  | 0   | 9  | RDR2-sensitive |
| GAAACTGTAGCCCCTATACGGTGA  | 0   | 27 | RDR2-sensitive |
| GAAAGACTGTGCAGGGAGGGGGAA  | 0   | 9  | RDR2-sensitive |
| GAAAGCCGTTGGACATAAGGGCAT  | 0   | 25 | RDR2-sensitive |
| GAAAGCGGGCTTGGGTCCGGGCTAG | 0   | 12 | RDR2-sensitive |
| GAAAGCTCGGGCTAAGGACACGGG  | 0   | 10 | RDR2-sensitive |
| GAAAGGCTAGAACTGATCCGGCTC  | 1   | 16 | RDR2-sensitive |
| GAAAGTGCCTAGAGGGGGGTGAA   | 0   | 11 | RDR2-sensitive |
| GAAAGTCTAGCTGTGCGCGTGCAA  | 0   | 13 | RDR2-sensitive |
| GAAAGTCTGACGGCCGATGAGCAA  | 0   | 9  | RDR2-sensitive |
| GAAAGTTGGGGGCTCGAAGACGAT  | 2   | 15 | RDR2-sensitive |
| GAAATACGTCGGGTAGGGTACGGA  | 1   | 34 | RDR2-sensitive |
| GAAATAGCAGTGGGCTGTGGTCAT  | 0   | 22 | RDR2-sensitive |
| GAAATCCAGGCACTGTCCGGCAAC  | 0   | 9  | RDR2-sensitive |
| GAAATCGACGACCGGCTAAGACGC  | 0   | 12 | RDR2-sensitive |
| GAAATCTTTTAGAGAAGACTGTAA  | 0   | 13 | RDR2-sensitive |
| GAAATGACTGTAGAGTAGGGCTAT  | 0   | 23 | RDR2-sensitive |
| GAAATGGACAAGCCGAGCCGAGCT  | 0   | 9  | RDR2-sensitive |
| GAAATGGACAAGGGCGTGCCACAC  | 7   | 95 | RDR2-sensitive |
| GAAATGGGAGCGGGAGCGGAACAA  | 0   | 16 | RDR2-sensitive |
| GAAATTAGTCTCTGTAGAGTGGCA  | 198 | 1  | RDR2-resistant |
| GAAATTCTCTGAGGACGACGGGAC  | 0   | 10 | RDR2-sensitive |
| GAAATTTAGGGGACGCTGCTGGAG  | 0   | 11 | RDR2-sensitive |
| GAAATTTAGGGGACGTTGCTGGAG  | 1   | 14 | RDR2-sensitive |
| GAAATTTTATTTGCACGTTTGGAC  | 0   | 24 | RDR2-sensitive |
| GAACAACAGCGATGCGGATGGACG  | 0   | 10 | RDR2-sensitive |
| GAACAACAGGTGACTGCAGAGAGG  | 0   | 16 | RDR2-sensitive |
| GAACAACAGTCTGATGGCGCTCTC  | 0   | 17 | RDR2-sensitive |
| GAACAACGCAGTGACGGACGACAT  | 0   | 10 | RDR2-sensitive |

|                           |   |     |                |
|---------------------------|---|-----|----------------|
| GAACAACCTCGGACTCCGCAAGACG | 0 | 11  | RDR2-sensitive |
| GAACAAGATCGTATCTGGCCCGGC  | 0 | 11  | RDR2-sensitive |
| GAACAAGATGGACCATAGGGCGAC  | 0 | 12  | RDR2-sensitive |
| GAACACATAGTCGGTTCGAGTCGTC | 0 | 9   | RDR2-sensitive |
| GAACACCGCGCAGCAGGGAGCCCA  | 0 | 10  | RDR2-sensitive |
| GAACACGCTTGTTCCGACAACGCA  | 0 | 43  | RDR2-sensitive |
| GAACACGCTTGTTCCGACGACGCA  | 0 | 16  | RDR2-sensitive |
| GAACACGGAATGGTGGCAGAACAC  | 0 | 19  | RDR2-sensitive |
| GAACACTCGGCAAAGTCTCGGTAA  | 0 | 9   | RDR2-sensitive |
| GAACACTCGGCACAGAACGGCACT  | 9 | 193 | RDR2-sensitive |
| GAACACTCGGCACAGGACAGCACT  | 1 | 13  | RDR2-sensitive |
| GAACACTCGGCACAGGACGACACT  | 4 | 42  | RDR2-sensitive |
| GAACACTCGGCACAGGACGCACTC  | 1 | 13  | RDR2-sensitive |
| GAACACTCGGCACAGGACGGCACT  | 1 | 17  | RDR2-sensitive |
| GAACACTCGGCACCGAACGGCACT  | 1 | 20  | RDR2-sensitive |
| GAACACTCGGCATAGAACGGCACT  | 0 | 11  | RDR2-sensitive |
| GAACACTGATAGGCGCAAGGACGT  | 0 | 30  | RDR2-sensitive |
| GAACAGAAGGGCACAACTGAGCAA  | 1 | 29  | RDR2-sensitive |
| GAACAGAAGGGCACAGCTGAGCAA  | 0 | 18  | RDR2-sensitive |
| GAACAGACCCTTAGTCCGATCGGA  | 0 | 13  | RDR2-sensitive |
| GAACAGATCTGGGCTAGGAGGCAC  | 2 | 23  | RDR2-sensitive |
| GAACAGCAAGCTGTGGACGATCAC  | 0 | 17  | RDR2-sensitive |
| GAACAGCATGCTGTCCGCGTCCGGC | 1 | 12  | RDR2-sensitive |
| GAACAGCCGTTGGCAGAACACGTC  | 0 | 20  | RDR2-sensitive |
| GAACAGCCGTTGGCAGAACCGGTC  | 1 | 18  | RDR2-sensitive |
| GAACAGCGGACTGTGTTGTGGCAC  | 0 | 12  | RDR2-sensitive |
| GAACAGGGCAACAGACGAACAGGC  | 0 | 17  | RDR2-sensitive |
| GAACAGGTACCTTCGGACTCGGAT  | 0 | 30  | RDR2-sensitive |
| GAACATACGTCCGACGGCTGTCAG  | 0 | 15  | RDR2-sensitive |
| GAACATATTGATCGTATCTGCGGA  | 0 | 24  | RDR2-sensitive |
| GAACATGAAGTGCGGTCAGGACGA  | 1 | 31  | RDR2-sensitive |
| GAACATGCAGGACGCGGACCTCAC  | 1 | 17  | RDR2-sensitive |
| GAACATGTGAGGATTGTGACGCAT  | 0 | 18  | RDR2-sensitive |
| GAACATTGCGGGGGACGGGGACGA  | 0 | 11  | RDR2-sensitive |
| GAACCAAGCGACGGACGAAGCAAC  | 0 | 17  | RDR2-sensitive |
| GAACCAATCAGGCGGAAGGGACGA  | 0 | 12  | RDR2-sensitive |
| GAACCACCGTCGTCATGGACGCAC  | 0 | 14  | RDR2-sensitive |
| GAACCACGACGAGCTCGAGCTGGC  | 0 | 10  | RDR2-sensitive |
| GAACCACGTCGCCTGTTTGGGCAT  | 0 | 14  | RDR2-sensitive |
| GAACCACTTGACGGTGCTCTCTGC  | 0 | 24  | RDR2-sensitive |
| GAACCAGAACCAGATCGAGCGCGC  | 0 | 15  | RDR2-sensitive |
| GAACCAGACGAAGGACGGGCTGAT  | 0 | 26  | RDR2-sensitive |
| GAACCAGATTGTAGGACTGGTCGG  | 0 | 13  | RDR2-sensitive |
| GAACCAGCACACGATCGGACGCGC  | 0 | 18  | RDR2-sensitive |
| GAACCAGTTTGAAGGGGTGGTCGG  | 0 | 33  | RDR2-sensitive |
| GAACCAGTTTGCAGGGGTGGTCGG  | 2 | 40  | RDR2-sensitive |
| GAACCAGTTTGTAGGGGTGGTCGG  | 0 | 32  | RDR2-sensitive |
| GAACCATCGCGGGCTGTACGACGG  | 1 | 22  | RDR2-sensitive |
| GAACCATCGGACTACAGTCGGTAA  | 0 | 15  | RDR2-sensitive |

|                           |    |    |                |
|---------------------------|----|----|----------------|
| GAACCATTTGGACTGACTTGGCAT  | 0  | 16 | RDR2-sensitive |
| GAACCCACGGGCTTAGACGGTCTG  | 0  | 28 | RDR2-sensitive |
| GAACCCAGGACCTGAGGAGTGCTA  | 0  | 14 | RDR2-sensitive |
| GAACCCATGCATATACCCGTCGGA  | 2  | 18 | RDR2-sensitive |
| GAACCCGGGACTCGTGAGAACGGC  | 1  | 12 | RDR2-sensitive |
| GAACCGAACGGACGGTGCAGATTC  | 0  | 11 | RDR2-sensitive |
| GAACCGAATCACGGCGTCGTCGGT  | 2  | 19 | RDR2-sensitive |
| GAACCGACTGGCTCAGAGCGCGGA  | 0  | 18 | RDR2-sensitive |
| GAACCGACTGTTGGTCCACGACATA | 0  | 10 | RDR2-sensitive |
| GAACCGAGGAACCGAACCGAAGAA  | 10 | 36 | RDR2-sensitive |
| GAACCGCCTAGCTGTGGACGACTA  | 0  | 13 | RDR2-sensitive |
| GAACCGCGGAACAGGATTCGGCCC  | 0  | 69 | RDR2-sensitive |
| GAACCGGACAGGAGGGTTGGGCAT  | 0  | 29 | RDR2-sensitive |
| GAACCGGTCTCAGCTGAACGACGC  | 0  | 9  | RDR2-sensitive |
| GAACCGTAGACCGTCCGGCCTCAG  | 1  | 21 | RDR2-sensitive |
| GAACCGTCAGGCTGTGTGCGCGGA  | 0  | 13 | RDR2-sensitive |
| GAACCGTCGGAACTAGTGGAGGCC  | 0  | 13 | RDR2-sensitive |
| GAACCGTCTCTGTAGATGCGGGCT  | 1  | 37 | RDR2-sensitive |
| GAACCGTGCAGGACGTGAAGGAC   | 1  | 18 | RDR2-sensitive |
| GAACCGTTTAGAGGACGCTGCTGG  | 0  | 13 | RDR2-sensitive |
| GAACCTGGAAGCGGAGCTCGGCGC  | 0  | 18 | RDR2-sensitive |
| GAACCTGGCCGACGACATGAACTA  | 0  | 10 | RDR2-sensitive |
| GAACCTTGGATCTATTGAGCAGAA  | 33 | 2  | RDR2-resistant |
| GAACCTTTGTTCCGGCGGCTCGGCA | 0  | 19 | RDR2-sensitive |
| GAACGAACCGGCCAGTAGAGACGA  | 0  | 13 | RDR2-sensitive |
| GAACGAACGGACGAACGATCGGAC  | 0  | 11 | RDR2-sensitive |
| GAACGAAGACGGGAACCGGTGAAA  | 0  | 11 | RDR2-sensitive |
| GAACGAAGGCAGAACGGTAGGCTA  | 0  | 33 | RDR2-sensitive |
| GAACGACACAAGGACGAACGACGA  | 0  | 9  | RDR2-sensitive |
| GAACGACCGCAACTGGGAGGCTAA  | 0  | 11 | RDR2-sensitive |
| GAACGACGCAACGACGAACGACGA  | 2  | 67 | RDR2-sensitive |
| GAACGACGCAGAGGACGCAGGCTC  | 0  | 18 | RDR2-sensitive |
| GAACGACGTGACGACGAACGACGG  | 1  | 20 | RDR2-sensitive |
| GAACGACGTGACGACGGATGAGCT  | 0  | 41 | RDR2-sensitive |
| GAACGACTCTGACGATTTGGCGGC  | 0  | 14 | RDR2-sensitive |
| GAACGACTGACGAAGAAGGGCGAT  | 0  | 15 | RDR2-sensitive |
| GAACGACTGGGCGGCGGCTGGACA  | 0  | 14 | RDR2-sensitive |
| GAACGAGGACTGAAACGGCCGGAT  | 0  | 11 | RDR2-sensitive |
| GAACGAGTTCTAGGGGGTAGACGG  | 0  | 11 | RDR2-sensitive |
| GAACGATCGGAATTTCCGGCAGCAT | 3  | 49 | RDR2-sensitive |
| GAACGATGAGATTGGTCGGCGGAC  | 0  | 21 | RDR2-sensitive |
| GAACGATGCGGAGGCCTGTCGCGG  | 0  | 9  | RDR2-sensitive |
| GAACGATGTCGGCAGCCCATGCAC  | 0  | 13 | RDR2-sensitive |
| GAACGCACGAACGAACAATGGCGA  | 0  | 18 | RDR2-sensitive |
| GAACGCACGAACGGACAATGGCGA  | 0  | 17 | RDR2-sensitive |
| GAACGCATCGGTAATCGGGACGGA  | 0  | 9  | RDR2-sensitive |
| GAACGCCAGATCGATCAGGCTAA   | 0  | 10 | RDR2-sensitive |
| GAACGCCTAGATCGGAGGAGAGAA  | 0  | 9  | RDR2-sensitive |
| GAACGCGACAGGGACGGTGACGGA  | 0  | 9  | RDR2-sensitive |

|                           |    |     |                |
|---------------------------|----|-----|----------------|
| GAACGCGGAAGTACAAGACGACAT  | 0  | 9   | RDR2-sensitive |
| GAACGCGGAATGGCCGACTACTAT  | 3  | 21  | RDR2-sensitive |
| GAACGCGGCAACACACGGCTCAAC  | 0  | 9   | RDR2-sensitive |
| GAACGCGTCAGAGGCAGAACACGT  | 0  | 14  | RDR2-sensitive |
| GAACGCGTCAGAGGCAGAACGGCA  | 0  | 12  | RDR2-sensitive |
| GAACGCGTGGAAGAGGCACTGTAG  | 0  | 25  | RDR2-sensitive |
| GAACGCTGGAACACTGGGACGAGC  | 0  | 9   | RDR2-sensitive |
| GAACGGAACAGAGCGTGACTGTGA  | 0  | 10  | RDR2-sensitive |
| GAACGGAACGGAGCATGACTGCGC  | 0  | 19  | RDR2-sensitive |
| GAACGGAACGTTGAGGTCGGCGTA  | 0  | 10  | RDR2-sensitive |
| GAACGGACAATGGCGACGTGCAAA  | 1  | 12  | RDR2-sensitive |
| GAACGGACCTGGATGTGCAGAGAT  | 1  | 28  | RDR2-sensitive |
| GAACGGACGAGACGCGACGCCATA  | 0  | 12  | RDR2-sensitive |
| GAACGGACGGCTTAGATTGGCTGA  | 0  | 26  | RDR2-sensitive |
| GAACGGACGGTCTAGATTGGTGGGA | 0  | 12  | RDR2-sensitive |
| GAACGGACGGTTGACATTGCAGAA  | 0  | 14  | RDR2-sensitive |
| GAACGGACGTGGGATGTTGGCGGA  | 1  | 12  | RDR2-sensitive |
| GAACGGAGATGGCTGGAACAGCGT  | 0  | 12  | RDR2-sensitive |
| GAACGGAGTTGCTGAGCCGTCGGA  | 0  | 13  | RDR2-sensitive |
| GAACGGCAGAACAGCAGACTACTC  | 0  | 37  | RDR2-sensitive |
| GAACGGCAGAACGAGTGAAGGCAT  | 0  | 10  | RDR2-sensitive |
| GAACGGCAGAACGCAGGAAGACAG  | 0  | 22  | RDR2-sensitive |
| GAACGGCAGAACGGCAGAACGCAG  | 0  | 18  | RDR2-sensitive |
| GAACGGCAGAACGGCAGAACGCGT  | 0  | 27  | RDR2-sensitive |
| GAACGGCAGAACGGCAGACTACTC  | 0  | 54  | RDR2-sensitive |
| GAACGGCATGCTGCTCGCGTCGGT  | 0  | 9   | RDR2-sensitive |
| GAACGGCTCCTCCGCGAACGGCTC  | 0  | 12  | RDR2-sensitive |
| GAACGGGACGACTGTGAAGACGAC  | 6  | 173 | RDR2-sensitive |
| GAACGGGAGTGAGCTCATCCGGTT  | 0  | 9   | RDR2-sensitive |
| GAACGGGCGTAGGAACAGCGGAGC  | 1  | 15  | RDR2-sensitive |
| GAACGGTAGAACACGGTGGCAGA   | 0  | 10  | RDR2-sensitive |
| GAACGGTAGAATGGACGACTGAGA  | 0  | 9   | RDR2-sensitive |
| GAACGGTAGAATGGACGGCTGAGA  | 0  | 17  | RDR2-sensitive |
| GAACGGTCAGAGCCTAGGGACGAA  | 0  | 11  | RDR2-sensitive |
| GAACGGTCGAACGGAACAGCAGAC  | 0  | 11  | RDR2-sensitive |
| GAACGGTCGCCAGAAGAGGAACAG  | 0  | 9   | RDR2-sensitive |
| GAACGGTCGCCGGGAAGAAGACGA  | 1  | 21  | RDR2-sensitive |
| GAACGGTCTGCGGCATAGGGTCGA  | 1  | 13  | RDR2-sensitive |
| GAACGGTCTGTAGACGAGGGTCGG  | 2  | 40  | RDR2-sensitive |
| GAACGGTCTGTGCTCTGGGCCGGA  | 1  | 47  | RDR2-sensitive |
| GAACGGTGGCAGAACGGGAATGAC  | 0  | 9   | RDR2-sensitive |
| GAACGGTTCGCGCTCTGGACCGGA  | 3  | 49  | RDR2-sensitive |
| GAACGTCCGACGCTGACGATGGTG  | 0  | 21  | RDR2-sensitive |
| GAACGTTCCGCGGGGATGGAGACGG | 2  | 15  | RDR2-sensitive |
| GAACGTTGCTGTAGCGAGTAGAGG  | 0  | 9   | RDR2-sensitive |
| GAACGTTTTTTTGGATTGATGGTA  | 81 | 2   | RDR2-resistant |
| GAACACTGACTTGGGCTGACGA    | 0  | 12  | RDR2-sensitive |
| GAACACTATGACCTGGGCTGACGA  | 1  | 37  | RDR2-sensitive |
| GAACCTCGCAGACGGAACAGAT    | 0  | 9   | RDR2-sensitive |

|                          |    |    |                |
|--------------------------|----|----|----------------|
| GAACTCGGAAAAGAGGCTCGGCTC | 0  | 22 | RDR2-sensitive |
| GAACTCGGTCATTCAGGGACAGTG | 0  | 9  | RDR2-sensitive |
| GAACTCTATCATCAGCTTGGGACA | 41 | 2  | RDR2-resistant |
| GAACTGAACCTGACGAGGCCGCAC | 0  | 9  | RDR2-sensitive |
| GAACTGCGCCGGATCGGAGGATGT | 0  | 10 | RDR2-sensitive |
| GAACTGCGGCTCTGGTGAACGGCG | 0  | 34 | RDR2-sensitive |
| GAACTGGACGAACACAACCACGGT | 0  | 19 | RDR2-sensitive |
| GAACTGGAGGACCTGCCTGCAGCA | 1  | 38 | RDR2-sensitive |
| GAACTGGATGAACCGGCTCGGCTA | 0  | 14 | RDR2-sensitive |
| GAACTGGGACTAGAGGACGACGAA | 0  | 44 | RDR2-sensitive |
| GAACTGGGCATCTGTAGGCGACAT | 0  | 29 | RDR2-sensitive |
| GAACTGTACATCGACAACGGCTTT | 0  | 14 | RDR2-sensitive |
| GAACTGTACATCGGCAACAGCCTA | 1  | 12 | RDR2-sensitive |
| GAACTGTACATCGGCAACAGCCTC | 2  | 16 | RDR2-sensitive |
| GAACTGTAGCCTTTATTGCAGAGT | 0  | 9  | RDR2-sensitive |
| GAACTGTGGCACGGCATGATTTTA | 0  | 12 | RDR2-sensitive |
| GAACTGTTTGATCGGCTCTTCATA | 18 | 0  | RDR2-resistant |
| GAACTTAGGATGCTCTGAGGTCGG | 0  | 9  | RDR2-sensitive |
| GAACTTCCAGGCGACGGCTGTAAT | 0  | 9  | RDR2-sensitive |
| GAACTTGATGGCTGGTACGGACGG | 0  | 11 | RDR2-sensitive |
| GAACTTGGTCTGCTAGATGACGAA | 0  | 11 | RDR2-sensitive |
| GAACTTGTGGACCAGAATATGCAT | 0  | 10 | RDR2-sensitive |
| GAACTTGTGGGCGGAGACGACCG  | 0  | 9  | RDR2-sensitive |
| GAACTTGTTCGTCGATGGACGCT  | 0  | 23 | RDR2-sensitive |
| GAAGAAAACAGGCAGAATTCTACA | 42 | 6  | RDR2-resistant |
| GAAGAACAGCGGTGTGCTCTGCAA | 0  | 28 | RDR2-sensitive |
| GAAGAACCCGGACCAGCACGGCAC | 0  | 12 | RDR2-sensitive |
| GAAGAACTCGAACCAGATGCCCGT | 0  | 16 | RDR2-sensitive |
| GAAGAACTCGCAGGAGAAGCCCCT | 0  | 11 | RDR2-sensitive |
| GAAGAACTTGGCGTAGACGACGAA | 0  | 12 | RDR2-sensitive |
| GAAGAAGAACCTGAGCGGACGTGC | 0  | 14 | RDR2-sensitive |
| GAAGAAGACCGGCGCGTAGGAGAC | 0  | 14 | RDR2-sensitive |
| GAAGAAGACGACTCTCTGCGCCAT | 0  | 9  | RDR2-sensitive |
| GAAGAAGGCGGCCAAGTTGGCGAG | 0  | 10 | RDR2-sensitive |
| GAAGACAAAACGGGCAGGGACACC | 0  | 10 | RDR2-sensitive |
| GAAGACAACGACGGACGTTGGGCA | 0  | 9  | RDR2-sensitive |
| GAAGACACTGGCAGCACGAAGACT | 0  | 10 | RDR2-sensitive |
| GAAGACAGGCACTACCGGACTCAC | 0  | 9  | RDR2-sensitive |
| GAAGACATGGACATCTGGAGGCGA | 0  | 33 | RDR2-sensitive |
| GAAGACCGCTGGACTGTCCGGTAT | 0  | 11 | RDR2-sensitive |
| GAAGACCTGAGCATCTGAAGGCGA | 0  | 25 | RDR2-sensitive |
| GAAGACCTGAGCATCTGGAGGCGA | 8  | 26 | RDR2-sensitive |
| GAAGACCTGGACATCTGGAGACGA | 0  | 10 | RDR2-sensitive |
| GAAGACCTGGACATCTGGAGGCGA | 2  | 40 | RDR2-sensitive |
| GAAGACCTGGACATCTGTAGGCGA | 0  | 16 | RDR2-sensitive |
| GAAGACCTGGGCATCTGAAGGCGA | 3  | 19 | RDR2-sensitive |
| GAAGACCTGGGCATCTGGAGACGA | 2  | 15 | RDR2-sensitive |
| GAAGACCTGGGCATCTGGAGGCGA | 1  | 30 | RDR2-sensitive |
| GAAGACCTGGGTATCTGGAGGCGA | 0  | 12 | RDR2-sensitive |

|                          |    |     |                |
|--------------------------|----|-----|----------------|
| GAAGACGAAGCGTCGGTTCGGCCT | 1  | 20  | RDR2-sensitive |
| GAAGACGACAGTAGAGGCGAGATA | 0  | 21  | RDR2-sensitive |
| GAAGACGACGAACTCGCAGAGGAT | 0  | 19  | RDR2-sensitive |
| GAAGACGACGGCTGCTCTATGCTT | 0  | 12  | RDR2-sensitive |
| GAAGACGACGTAGAGGACGCACAG | 0  | 13  | RDR2-sensitive |
| GAAGACGACTCTCTGCGCCATCGC | 0  | 10  | RDR2-sensitive |
| GAAGACGACTGATGTGGGAGTCCA | 66 | 2   | RDR2-resistant |
| GAAGACGCAGGCAACCGAACACGC | 0  | 11  | RDR2-sensitive |
| GAAGACGCCGCATCTGTACAACAC | 0  | 25  | RDR2-sensitive |
| GAAGACGCGCGAGAAGCTGGACGT | 0  | 15  | RDR2-sensitive |
| GAAGACGGCCTGAGTGGGACGGTT | 5  | 22  | RDR2-sensitive |
| GAAGACGGCTGTGACGGAGGGCGA | 0  | 9   | RDR2-sensitive |
| GAAGACGGGAGTAGAGGACCTCAG | 0  | 18  | RDR2-sensitive |
| GAAGACGTAGAGTCAGACGACGTT | 0  | 15  | RDR2-sensitive |
| GAAGACGTCATGTGCACTCACTAT | 35 | 0   | RDR2-resistant |
| GAAGACGTGACTGCATATGTCTGA | 0  | 12  | RDR2-sensitive |
| GAAGACTCGCGTAGGACAGTTCGG | 0  | 20  | RDR2-sensitive |
| GAAGACTGGAAGTAGGGACGTTCT | 0  | 13  | RDR2-sensitive |
| GAAGACTGGGCCTCGGGCGAGCCG | 0  | 13  | RDR2-sensitive |
| GAAGACTGTAAGGACGGATATAG  | 2  | 14  | RDR2-sensitive |
| GAAGACTGTAAGCAGCCACGGCGT | 0  | 12  | RDR2-sensitive |
| GAAGACTGTAAGCAGCCGTCGCAT | 0  | 14  | RDR2-sensitive |
| GAAGACTGTAAGGGGGTAGGCTGC | 1  | 62  | RDR2-sensitive |
| GAAGACTGTTGTAGATGGCAAGAT | 23 | 0   | RDR2-resistant |
| GAAGAGACAGTAGAGGACCGGCCC | 0  | 11  | RDR2-sensitive |
| GAAGAGACGGACATACTCGGAGAA | 0  | 12  | RDR2-sensitive |
| GAAGAGACGTACGTACAGAGCATC | 0  | 24  | RDR2-sensitive |
| GAAGAGAGCGCTGTAGTGCACGGG | 0  | 10  | RDR2-sensitive |
| GAAGAGAGCTATCTGGTCGCGGAC | 0  | 9   | RDR2-sensitive |
| GAAGAGAGTGACGTAGGGACGACA | 0  | 18  | RDR2-sensitive |
| GAAGAGCCAAGTAGAACGGAGCCA | 0  | 10  | RDR2-sensitive |
| GAAGAGCCAAGTAGAACGGAGCCG | 2  | 45  | RDR2-sensitive |
| GAAGAGGACCGACACGTAGAGGGC | 0  | 10  | RDR2-sensitive |
| GAAGAGGATGGCAGTATGTCTCGT | 0  | 33  | RDR2-sensitive |
| GAAGAGTAGAGGATGATGATAAGT | 24 | 1   | RDR2-resistant |
| GAAGATAGCTATCTGGTCGCGGAC | 0  | 16  | RDR2-sensitive |
| GAAGATAGCTATCTGTTCGCGGAC | 2  | 17  | RDR2-sensitive |
| GAAGATCCGGCAGTGACGAAGCAG | 0  | 17  | RDR2-sensitive |
| GAAGATCCTGACAGTAGCCGCCAT | 0  | 9   | RDR2-sensitive |
| GAAGATCGGCAGCAGCGGAGCTAT | 0  | 12  | RDR2-sensitive |
| GAAGATCGGGCATCATGACGCATC | 0  | 16  | RDR2-sensitive |
| GAAGATCGGGCATCGTGACACATC | 0  | 14  | RDR2-sensitive |
| GAAGATCGGGCATCGTGACGCATC | 4  | 230 | RDR2-sensitive |
| GAAGATCTGTGGAATAGGGGCATC | 1  | 17  | RDR2-sensitive |
| GAAGCAACCTTGGCCAGATCGTCT | 0  | 11  | RDR2-sensitive |
| GAAGCAAGGGCGGACGGTGGAGAG | 0  | 9   | RDR2-sensitive |
| GAAGCAGCCTCGGCTCGGTCTCGT | 0  | 14  | RDR2-sensitive |
| GAAGCAGGAGCTGGAGCTTTGCCA | 1  | 24  | RDR2-sensitive |
| GAAGCAGTAGAAGTCGGTACGGAT | 0  | 11  | RDR2-sensitive |



|                           |     |    |                |
|---------------------------|-----|----|----------------|
| GAAGCATAGCACCAGATCGCGGAC  | 0   | 9  | RDR2-sensitive |
| GAAGCCCCTGAGCAGCAGTCGGTT  | 5   | 93 | RDR2-sensitive |
| GAAGCCCTTTGGTGAAGACGTCGG  | 1   | 13 | RDR2-sensitive |
| GAAGCCTCGGACGACAGACGACAG  | 0   | 9  | RDR2-sensitive |
| GAAGCCTCGGACGACGGACGACAT  | 1   | 20 | RDR2-sensitive |
| GAAGCCTCTGAAGAAGTTCGTCAT  | 4   | 36 | RDR2-sensitive |
| GAAGCCTGAACCAGACGAAGGACG  | 1   | 20 | RDR2-sensitive |
| GAAGCCTGAACCAGACGAAGGTCG  | 0   | 9  | RDR2-sensitive |
| GAAGCGACGTAGGATGAGCGGTGT  | 1   | 18 | RDR2-sensitive |
| GAAGCGCACGGACGGACGGTGTAG  | 0   | 10 | RDR2-sensitive |
| GAAGCGCGTCTGAACGGAGGTTT   | 0   | 24 | RDR2-sensitive |
| GAAGCGGACTGACGGTGTAGATTT  | 0   | 18 | RDR2-sensitive |
| GAAGCGGACTGGATCAGGCAGTGT  | 0   | 11 | RDR2-sensitive |
| GAAGCGGAGGCAGAACGGGTTGGT  | 0   | 29 | RDR2-sensitive |
| GAAGCGGTCGGTTGGTGAGGCGGG  | 0   | 10 | RDR2-sensitive |
| GAAGCGTCTAGACTTGAACCGGTA  | 0   | 19 | RDR2-sensitive |
| GAAGCTAGACTCTCGGCAACGCGG  | 0   | 25 | RDR2-sensitive |
| GAAGCTCGGCGCCAATGATGACGG  | 3   | 20 | RDR2-sensitive |
| GAAGCTCTTGAGGACGACGGGCC   | 3   | 21 | RDR2-sensitive |
| GAAGCTCTGAACGGATTTCGGCCAC | 0   | 11 | RDR2-sensitive |
| GAAGCTCTGGTCAACGGATTGCGG  | 2   | 16 | RDR2-sensitive |
| GAAGCTGACTGAATAGGTGGACGT  | 0   | 12 | RDR2-sensitive |
| GAAGCTGCTCGTACGTGACGCCAA  | 0   | 9  | RDR2-sensitive |
| GAAGCTGGGCTGGCGAAACGGTGA  | 1   | 19 | RDR2-sensitive |
| GAAGCTGTAGAAGCCGGTACGGAT  | 0   | 9  | RDR2-sensitive |
| GAAGCTGTGGACGCCTACTTTGCT  | 3   | 26 | RDR2-sensitive |
| GAAGCTTACTGGGACGGCGATCA   | 0   | 9  | RDR2-sensitive |
| GAAGCTTTTCGTCGGCAGGCCAC   | 0   | 10 | RDR2-sensitive |
| GAAGGAAACCTGGGAACCGGCAA   | 3   | 56 | RDR2-sensitive |
| GAAGGAAACCTGGGAACCGGTAAA  | 0   | 29 | RDR2-sensitive |
| GAAGGAAGGGTAGGGTTCGTTGGAG | 0   | 9  | RDR2-sensitive |
| GAAGGACAAGCAGACTGCAACTTT  | 0   | 15 | RDR2-sensitive |
| GAAGGACACGACGAAGACATGGAC  | 0   | 9  | RDR2-sensitive |
| GAAGGACACGAGAACAGTGAGGCT  | 0   | 12 | RDR2-sensitive |
| GAAGGACACGGACAGCGGAAGCGA  | 0   | 9  | RDR2-sensitive |
| GAAGGACCATGTGGAAGAAGCCGC  | 0   | 30 | RDR2-sensitive |
| GAAGGACCCAGAAACGACCCCTAG  | 0   | 14 | RDR2-sensitive |
| GAAGGACCGGTAAGATGACCACAG  | 0   | 9  | RDR2-sensitive |
| GAAGGACCTGTGAGACGACCAGAG  | 0   | 15 | RDR2-sensitive |
| GAAGGACGCCGACGACTGCACGGC  | 100 | 3  | RDR2-resistant |
| GAAGGACGCTGTGAGACCACCGG   | 2   | 45 | RDR2-sensitive |
| GAAGGACGGCTCTCGGCAAAGGAC  | 1   | 17 | RDR2-sensitive |
| GAAGGACGTCGACGACTGCACGGC  | 0   | 17 | RDR2-sensitive |
| GAAGGACTCGAGCGAAGGGTGGCG  | 0   | 9  | RDR2-sensitive |
| GAAGGACTCGATACGTGACGCTAT  | 0   | 36 | RDR2-sensitive |
| GAAGGACTCGGCAAGCGACGACGC  | 0   | 12 | RDR2-sensitive |
| GAAGGACTCGGCGAGCAGCGACAC  | 0   | 11 | RDR2-sensitive |
| GAAGGACTGACACACGCGCGCGTC  | 0   | 9  | RDR2-sensitive |
| GAAGGACTGCCACACGCGCGCGCG  | 5   | 21 | RDR2-sensitive |

|                          |    |     |                |
|--------------------------|----|-----|----------------|
| GAAGGACTGCCACGCGCGTGCCGC | 0  | 13  | RDR2-sensitive |
| GAAGGACTGCTATACGTGCGCGAC | 0  | 21  | RDR2-sensitive |
| GAAGGACTGTCACGCGCGCTGC   | 0  | 9   | RDR2-sensitive |
| GAAGGACTTAGGGGAAGCAGCATA | 22 | 0   | RDR2-resistant |
| GAAGGACTTGCGGAGTAGCGACGC | 0  | 18  | RDR2-sensitive |
| GAAGGACTTTGCCATGACAGCTGC | 0  | 17  | RDR2-sensitive |
| GAAGGAGACGTAGAAGAGACGCGC | 1  | 57  | RDR2-sensitive |
| GAAGGAGCAGGAGAACGCCGAAGC | 0  | 19  | RDR2-sensitive |
| GAAGGAGCTGTAGCTAGGAAGAGG | 0  | 10  | RDR2-sensitive |
| GAAGGAGGACGCAGGATATGACGG | 2  | 21  | RDR2-sensitive |
| GAAGGATAGAGCAGACGAGACGGT | 0  | 9   | RDR2-sensitive |
| GAAGGATGTCGGGCAGAACACGGT | 0  | 17  | RDR2-sensitive |
| GAAGGATTTATAGTAGATACGGAT | 0  | 12  | RDR2-sensitive |
| GAAGGCACGGACGCACGGTACCAC | 1  | 18  | RDR2-sensitive |
| GAAGGCATCACGTAGGGACTGGCG | 0  | 15  | RDR2-sensitive |
| GAAGGCCAGGTAGAGCGGTTAGTT | 0  | 19  | RDR2-sensitive |
| GAAGGCCAGGTAGAGCGGTTGGTT | 0  | 138 | RDR2-sensitive |
| GAAGGCCGAAGATACTGCACTGTC | 0  | 16  | RDR2-sensitive |
| GAAGGCCGTCGGAAATAAGGCTAT | 0  | 11  | RDR2-sensitive |
| GAAGGCCTCGAGCGAAGGGTGGCG | 0  | 15  | RDR2-sensitive |
| GAAGGCGATCAGGATTGGTGACGG | 0  | 13  | RDR2-sensitive |
| GAAGGCGCTGTGGAGAAGACGCCG | 1  | 20  | RDR2-sensitive |
| GAAGGCGGGCTGGGCAGCAGCTAG | 19 | 0   | RDR2-resistant |
| GAAGGCTCTTAACCTTGTGGTCGT | 0  | 15  | RDR2-sensitive |
| GAAGGCTGGCAGAGTGGAGGACGC | 0  | 10  | RDR2-sensitive |
| GAAGGGAATAAAAGGCGGCTCAG  | 2  | 35  | RDR2-sensitive |
| GAAGGGAATAAGACGGGCCAGCAC | 0  | 9   | RDR2-sensitive |
| GAAGGGACAGTAGCAAACACCGGA | 2  | 23  | RDR2-sensitive |
| GAAGGGACCTGAAAAGCTAGGCGT | 0  | 17  | RDR2-sensitive |
| GAAGGGACGAGAGAGGACGCCAGA | 0  | 9   | RDR2-sensitive |
| GAAGGGAGTGTGGGTGTATCGGCA | 0  | 10  | RDR2-sensitive |
| GAAGGGATAGAATAGGACGGACAC | 0  | 24  | RDR2-sensitive |
| GAAGGGCGTGGAGTAGATGCAGGC | 0  | 11  | RDR2-sensitive |
| GAAGGGCTACGGCGATTAECTCGG | 1  | 17  | RDR2-sensitive |
| GAAGGGCTGCGTAGAGATCGGCGA | 0  | 9   | RDR2-sensitive |
| GAAGGGCTGGACGAAGCATGAGGG | 0  | 14  | RDR2-sensitive |
| GAAGGGCTTAAGCGAGGAGCTGGT | 0  | 14  | RDR2-sensitive |
| GAAGGGGAAGGGGGTGTACTGTAG | 0  | 9   | RDR2-sensitive |
| GAAGGGGACCGACACGTAGGGGGC | 1  | 21  | RDR2-sensitive |
| GAAGGGGACTGACACGTAGGGCGC | 0  | 12  | RDR2-sensitive |
| GAAGGGGGCACGGTAGAGGGCTGC | 0  | 76  | RDR2-sensitive |
| GAAGGGTTTTGTGAAGATATCGGC | 51 | 0   | RDR2-resistant |
| GAAGGTAATACTGTAGCGCGTCAT | 1  | 16  | RDR2-sensitive |
| GAAGGTAGCTATCTGGTCGCGGAC | 0  | 27  | RDR2-sensitive |
| GAAGGTCCTGCAGAAAGAGACAGC | 0  | 19  | RDR2-sensitive |
| GAAGGTCGGCGACAATGATGGCCC | 0  | 12  | RDR2-sensitive |
| GAAGTACCTGTAGGTCGCGGCGGC | 0  | 9   | RDR2-sensitive |
| GAAGTAGAACGCTCGCATCCGGTA | 0  | 10  | RDR2-sensitive |
| GAAGTCATTGTGGTGCGCGGACGG | 0  | 19  | RDR2-sensitive |

|                          |    |    |                |
|--------------------------|----|----|----------------|
| GAAGTCGACGCAGAGGATCCCCT  | 0  | 10 | RDR2-sensitive |
| GAAGTCGCGCCTGTGCATACCAGC | 0  | 15 | RDR2-sensitive |
| GAAGTCGGAGCTGCTACGTTAGAG | 0  | 10 | RDR2-sensitive |
| GAAGTCGTAGTAGCACCAGACGTC | 0  | 12 | RDR2-sensitive |
| GAAGTCTGCGTGGTATTGATGGTT | 22 | 0  | RDR2-resistant |
| GAAGTCTGGAGCGAGCTGGTGAGG | 0  | 13 | RDR2-sensitive |
| GAAGTCTGGCTGTGAACACGGCAA | 0  | 9  | RDR2-sensitive |
| GAAGTGAGGGAGGTGGGGACAGTC | 0  | 10 | RDR2-sensitive |
| GAAGTGAGTAGAGGACGTTCTGAT | 0  | 10 | RDR2-sensitive |
| GAAGTGCCTGAGCCCTGTAGAAGC | 0  | 19 | RDR2-sensitive |
| GAAGTGCGGCGGGCTGTGGCGGCT | 0  | 12 | RDR2-sensitive |
| GAAGTGCTTGAGCCCTGTAGAAGC | 0  | 13 | RDR2-sensitive |
| GAAGTGGACTAGTAAAAATTGGCA | 42 | 3  | RDR2-resistant |
| GAAGTGGAGAACCGAAGACGACGC | 0  | 16 | RDR2-sensitive |
| GAAGTTCTTCAAGCTCTGGATGGC | 0  | 13 | RDR2-sensitive |
| GAAGTTGATGTGGTCTAGCTCGGC | 0  | 9  | RDR2-sensitive |
| GAAGTTGATTGTAGCTCGATGGTT | 0  | 11 | RDR2-sensitive |
| GAAGTTGGGCCGATTGTTTGGGC  | 0  | 9  | RDR2-sensitive |
| GAAGTTTGCFACTCGGACAGGCCT | 2  | 26 | RDR2-sensitive |
| GAAGTTTATTGTTTTATCCGGTG  | 44 | 1  | RDR2-resistant |
| GAATAACATAACGCCGTCGGCCA  | 0  | 10 | RDR2-sensitive |
| GAATAACGGACAGAGCCGGTCCGG | 0  | 11 | RDR2-sensitive |
| GAATAAGACCGTAGGGACAGAGGA | 0  | 10 | RDR2-sensitive |
| GAATAAGCAGGCCGGACTTGACAG | 0  | 14 | RDR2-sensitive |
| GAATACAGCACGGATCGGTTGGAT | 0  | 9  | RDR2-sensitive |
| GAATACTCTGTCGTATCGGGTCGG | 0  | 12 | RDR2-sensitive |
| GAATAGAGCGGACGGAGCCACGGA | 0  | 10 | RDR2-sensitive |
| GAATAGGGTCGTGTCTGGTCCGGC | 0  | 11 | RDR2-sensitive |
| GAATAGTTCGGTTTAGAGGTGGTT | 39 | 0  | RDR2-resistant |
| GAATAGTTGGAGGTAGGAGGGCCT | 0  | 9  | RDR2-sensitive |
| GAATATAGAGGACGTTGCTGGAGA | 0  | 15 | RDR2-sensitive |
| GAATATTCCGGATCTGAGCGGCTC | 0  | 21 | RDR2-sensitive |
| GAATATTTTCGTCCGCCGGCCAC  | 0  | 9  | RDR2-sensitive |
| GAATCAAGCGAGCTGACGAACCAC | 0  | 31 | RDR2-sensitive |
| GAATCAGGAATGGAACGGCTCCGT | 0  | 17 | RDR2-sensitive |
| GAATCAGGGATGGAACGGCTCCGT | 1  | 12 | RDR2-sensitive |
| GAATCCATGGTCGTCATCGTCGTC | 0  | 11 | RDR2-sensitive |
| GAATCCCTGGGCACGCGTCGGCAC | 0  | 38 | RDR2-sensitive |
| GAATCGAGCGAGCTGACGAGCCAT | 0  | 20 | RDR2-sensitive |
| GAATCGGACCTAACAGCGGCTTC  | 0  | 14 | RDR2-sensitive |
| GAATCGGCCTGATGGGACTAACGG | 0  | 9  | RDR2-sensitive |
| GAATCGGGTGAAGACGGAGCCAGC | 0  | 11 | RDR2-sensitive |
| GAATCGGTCAGGAACGGAGGCAT  | 4  | 99 | RDR2-sensitive |
| GAATCTATCTCGGATCTCATGGCG | 24 | 0  | RDR2-resistant |
| GAATCTCGACGTAAGTGACGGTG  | 3  | 41 | RDR2-sensitive |
| GAATCTCGCAGGAGACCACTCTGA | 0  | 9  | RDR2-sensitive |
| GAATCTCGTTTGGATAATCGTCGT | 0  | 17 | RDR2-sensitive |
| GAATCTCTCGGACTACGGCACACT | 0  | 15 | RDR2-sensitive |
| GAATCTGAGCGTCGGCAGGGGCAG | 43 | 9  | RDR2-resistant |

|                           |     |     |                |
|---------------------------|-----|-----|----------------|
| GAATCTTGCTGACGTGGCTGCATA  | 0   | 9   | RDR2-sensitive |
| GAATGAATGTAGAACGGCAGGCTA  | 0   | 12  | RDR2-sensitive |
| GAATGACTCTGCGATACGGCTGAT  | 14  | 0   | RDR2-resistant |
| GAATGAGGACGACGGTAGATGTAT  | 0   | 11  | RDR2-sensitive |
| GAATGAGTGGGCTGCTAATGGTAA  | 24  | 0   | RDR2-resistant |
| GAATGATAATGATCGAGCGATGAC  | 29  | 1   | RDR2-resistant |
| GAATGATCGCGGCACGGAATCGGA  | 1   | 13  | RDR2-sensitive |
| GAATGCAACACGAGGACTTCCCAG  | 87  | 6   | RDR2-resistant |
| GAATGCACGAACGGACAATGGCGA  | 0   | 12  | RDR2-sensitive |
| GAATGCACGGATCTGGATATGCGG  | 0   | 9   | RDR2-sensitive |
| GAATGCTCCTGCGATACGGTCGGT  | 2   | 14  | RDR2-sensitive |
| GAATGCTGGTCTGCATACACTCAT  | 0   | 17  | RDR2-sensitive |
| GAATGCTTTTACAGGTCGTTTGGGA | 0   | 10  | RDR2-sensitive |
| GAATGGACGACTGACCGCGGGACG  | 0   | 20  | RDR2-sensitive |
| GAATGGACGACTGAGACAGCAGAA  | 0   | 14  | RDR2-sensitive |
| GAATGGACGGCTGAGATCGCAGAA  | 1   | 74  | RDR2-sensitive |
| GAATGGATTGGGAAGGGACGGAAC  | 0   | 16  | RDR2-sensitive |
| GAATGGGAATGGCAGAACACGGAA  | 1   | 63  | RDR2-sensitive |
| GAATGGGCTTTGCAGTGAGGACAG  | 0   | 9   | RDR2-sensitive |
| GAATGGGCTTTGCAGTGAGGACGG  | 3   | 23  | RDR2-sensitive |
| GAATGGGGACGCAGATGAGGGATT  | 167 | 0   | RDR2-resistant |
| GAATGGTCTTTGGACGAAGGTCAT  | 29  | 2   | RDR2-resistant |
| GAATGGTGGCAGAACACGGAATGA  | 0   | 35  | RDR2-sensitive |
| GAATGGTGTGATCGGTGGACGCAA  | 0   | 21  | RDR2-sensitive |
| GAATGGTTCGGCTGCTTCGATGGC  | 0   | 16  | RDR2-sensitive |
| GAATGTACCTGGTAGACACGTCSGA | 0   | 10  | RDR2-sensitive |
| GAATGTACTGTATACGGATTGCAT  | 0   | 35  | RDR2-sensitive |
| GAATGTAGGGCGAGTAGAGACGCG  | 0   | 18  | RDR2-sensitive |
| GAATGTATTTACGTCGGAAACAG   | 0   | 18  | RDR2-sensitive |
| GAATGTTCTGACGCTAGTTTCGATC | 17  | 1   | RDR2-resistant |
| GAATGTTGGCTGGCTCGAGGCATC  | 14  | 0   | RDR2-resistant |
| GAATTAGTCGACGGAGTTGGGCAA  | 0   | 13  | RDR2-sensitive |
| GAATTATAGCCGGACGGTCCGCAC  | 0   | 10  | RDR2-sensitive |
| GAATTATAGCGGAGTGGCTCCCAG  | 0   | 10  | RDR2-sensitive |
| GAATTCATGGCCGGTCACTAGCGA  | 0   | 10  | RDR2-sensitive |
| GAATTCCGGTAGTGATGGCTCATG  | 0   | 24  | RDR2-sensitive |
| GAATTCTGTGGACGCGGACGCGGT  | 3   | 70  | RDR2-sensitive |
| GAATTGACGGTGACTTGTAACAAT  | 16  | 0   | RDR2-resistant |
| GAATTGTGGAGCGGGCAGAACCCT  | 0   | 19  | RDR2-sensitive |
| GAATTTAGGGGACGTTGCTGGAGA  | 3   | 36  | RDR2-sensitive |
| GAATTTGTGGTTCTGATCGCATGA  | 15  | 0   | RDR2-resistant |
| GACAAAATGCTCGCGGCTCGTCGG  | 0   | 15  | RDR2-sensitive |
| GACAAACCGGACACTTGAGGGCAT  | 3   | 27  | RDR2-sensitive |
| GACAAACTGTGGAGGAGGAGACGA  | 0   | 22  | RDR2-sensitive |
| GACAAAGACTTCGGCACTCGGCAA  | 1   | 43  | RDR2-sensitive |
| GACAACAGGGGACAACACTGGATA  | 0   | 9   | RDR2-sensitive |
| GACAACCCTGTAGAGCGCGGGCAG  | 0   | 109 | RDR2-sensitive |
| GACAACTGCCGTCGGCTTGCTAA   | 4   | 37  | RDR2-sensitive |
| GACAACTGTAGACGGCCCCCGCC   | 0   | 10  | RDR2-sensitive |

|                           |     |     |                |
|---------------------------|-----|-----|----------------|
| GACAAGCTGGAACAGGGACGCGTC  | 0   | 9   | RDR2-sensitive |
| GACAAGGAGATGGTGACCGCTGAT  | 0   | 21  | RDR2-sensitive |
| GACAAGGTAGATCGGTAAGCAACT  | 23  | 0   | RDR2-resistant |
| GACAAGGTTCTCGGATCAGGCTGC  | 0   | 12  | RDR2-sensitive |
| GACAATCCACTGTATGGCTTCGGC  | 47  | 6   | RDR2-resistant |
| GACAATCGAACTGGGCTGGCACGG  | 0   | 16  | RDR2-sensitive |
| GACAATCGGCCAGGTGCACGACGC  | 2   | 19  | RDR2-sensitive |
| GACAATCGGGCGGGTACAACACGG  | 0   | 15  | RDR2-sensitive |
| GACAATCGGGCGGGTAGAACGCGG  | 0   | 10  | RDR2-sensitive |
| GACAATCGGGCGGGTAGTACACGG  | 0   | 15  | RDR2-sensitive |
| GACAATCGGGCGGTAGCGAGACGAC | 1   | 57  | RDR2-sensitive |
| GACAATCGGGTGGGTAGTACGCGG  | 0   | 27  | RDR2-sensitive |
| GACAATCACTCGTCCAGGG       | 0   | 45  | RDR2-sensitive |
| GACAATTCGGCGGGTAGTACACGG  | 0   | 9   | RDR2-sensitive |
| GACAATTTACTCGTCCAGGG      | 20  | 188 | RDR2-sensitive |
| GACAATTTACTCGTCTAGGG      | 3   | 22  | RDR2-sensitive |
| GACAATTTACTCGTCCAGG       | 3   | 18  | RDR2-sensitive |
| GACACAAAGTCAGTTATCGTCGTT  | 22  | 0   | RDR2-resistant |
| GACACAACTCGGACAACGTGGCGT  | 0   | 19  | RDR2-sensitive |
| GACACAACTCTGGCCCAGGCACGT  | 0   | 9   | RDR2-sensitive |
| GACACAATCTGTACAGTCGTCGGG  | 0   | 15  | RDR2-sensitive |
| GACACAGATTAGGATCGTGCCGGT  | 0   | 9   | RDR2-sensitive |
| GACACATTAGACGGGCTGGGTCGT  | 0   | 11  | RDR2-sensitive |
| GACACCACTGTTGAGCTACCGGCT  | 0   | 22  | RDR2-sensitive |
| GACACCACTGTTGGGCTGTCGGAC  | 0   | 12  | RDR2-sensitive |
| GACACCACTGTTGGGCTGTCGGCC  | 0   | 29  | RDR2-sensitive |
| GACACCCGATCCAGGAAGAGGCTA  | 0   | 15  | RDR2-sensitive |
| GACACCCGTGGTCGTAGGATAGCC  | 0   | 18  | RDR2-sensitive |
| GACACCCTTCGCAGGACTCGGCAC  | 2   | 38  | RDR2-sensitive |
| GACACCGCGGCTGGCATAGTGCAC  | 0   | 10  | RDR2-sensitive |
| GACACCGTCTGTTGGGCCGTTGGG  | 4   | 23  | RDR2-sensitive |
| GACACCTGGACTGGAGAAGATGGT  | 1   | 12  | RDR2-sensitive |
| GACACGAATAAGCAGGCCGGACTT  | 0   | 13  | RDR2-sensitive |
| GACACGACTCTCGGCAACGGATAT  | 772 | 50  | RDR2-resistant |
| GACACGCGGAACGACGACGAGATC  | 2   | 31  | RDR2-sensitive |
| GACACGCGGAACGACGATGAGATC  | 0   | 13  | RDR2-sensitive |
| GACACGCTTCTACAGATCGCTCGA  | 0   | 12  | RDR2-sensitive |
| GACACGGACCGTACTGAAGCGTGC  | 0   | 9   | RDR2-sensitive |
| GACACGGATCTGTTAGCGTGCCGG  | 0   | 9   | RDR2-sensitive |
| GACACGGATTAGGACCATGCCGGT  | 0   | 20  | RDR2-sensitive |
| GACACGGATTAGGACTGTACCGGC  | 0   | 9   | RDR2-sensitive |
| GACACGGCACGATTGGAACCAGGC  | 0   | 19  | RDR2-sensitive |
| GACACGGGCTAGATGCACGCGGGC  | 1   | 15  | RDR2-sensitive |
| GACACGGTAGAATAAGCGGGCGGG  | 0   | 14  | RDR2-sensitive |
| GACACGGTATCTGTCGGGCCTTTT  | 0   | 11  | RDR2-sensitive |
| GACACGGTCCGTAGTGCTTCGGCA  | 0   | 11  | RDR2-sensitive |
| GACACGGTCTGAAGACGGGTATAA  | 0   | 14  | RDR2-sensitive |
| GACACGTAGGGCGCTGTAGCAGGC  | 0   | 66  | RDR2-sensitive |
| GACAACTGTAGCAAAATGGTTCGT  | 0   | 10  | RDR2-sensitive |

|                            |    |    |                |
|----------------------------|----|----|----------------|
| GACACGTCGACAGAAACCAACGGT   | 0  | 18 | RDR2-sensitive |
| GACACTACGGGCTGAATTGGTGGC   | 1  | 14 | RDR2-sensitive |
| GACACTACTGTTGGACTGCCGGCT   | 0  | 29 | RDR2-sensitive |
| GACACTATAGTAGCGAGTCGGATC   | 0  | 9  | RDR2-sensitive |
| GACTACTCGGCAAAGAAGGCTCCAG  | 0  | 10 | RDR2-sensitive |
| GACTACTCGGCAAAGAAGGCTCGGC  | 6  | 47 | RDR2-sensitive |
| GACTACTCGGCAAAGACTGCGGCAC  | 0  | 18 | RDR2-sensitive |
| GACTACTCGGCAAAGACTGGTCCAG  | 1  | 12 | RDR2-sensitive |
| GACTACTCGGCAAAGAGACTGGCAA  | 1  | 12 | RDR2-sensitive |
| GACTACTCGGCAAAGTCTGACGGAC  | 0  | 17 | RDR2-sensitive |
| GACTACTCGGCTCAGACACGGCACT  | 0  | 11 | RDR2-sensitive |
| GACTACTGAGCTGGACGGTCTATAA  | 0  | 9  | RDR2-sensitive |
| GACTACTGCGGACGGTGAGAGGCGC  | 0  | 32 | RDR2-sensitive |
| GACTACTGGATATAGGATTGGGCAT  | 0  | 10 | RDR2-sensitive |
| GACTACTGTAGTACACGACCCGGTC  | 0  | 12 | RDR2-sensitive |
| GACTACTGTCTGGTACTGTCTGGCGT | 0  | 17 | RDR2-sensitive |
| GACTACTGTGCTAGCTAGGTCGGGT  | 0  | 9  | RDR2-sensitive |
| GACTACTGTGGACAGCGTTTACGAC  | 0  | 16 | RDR2-sensitive |
| GACTACTGTGGGTCGAGAAGTCGAT  | 0  | 12 | RDR2-sensitive |
| GACAGAACACCGGAATGAGGACGGA  | 0  | 10 | RDR2-sensitive |
| GACAGAACACCGGAATGGCTGACTA  | 0  | 10 | RDR2-sensitive |
| GACAGAACACCGGAATGGGGCAGCC  | 0  | 12 | RDR2-sensitive |
| GACAGAACGACAGAACGGCAGAAC   | 0  | 11 | RDR2-sensitive |
| GACAGAACCGGAACGAGATGGACAA  | 0  | 72 | RDR2-sensitive |
| GACAGACACAATGACGGACCTCAA   | 0  | 10 | RDR2-sensitive |
| GACAGACATGGGAATGGGAACGGT   | 0  | 15 | RDR2-sensitive |
| GACAGACTGATGTGGCACCAACAT   | 1  | 15 | RDR2-sensitive |
| GACAGACTGTAGTGGTGGAAAGATG  | 0  | 11 | RDR2-sensitive |
| GACAGAGACGGACCCACGAATCAT   | 0  | 10 | RDR2-sensitive |
| GACAGAGACTGAGTCAGACGAGCT   | 0  | 12 | RDR2-sensitive |
| GACAGAGACTGAGTTAGACGAGCT   | 0  | 11 | RDR2-sensitive |
| GACAGAGCAGAGGCTACGGAACGC   | 0  | 13 | RDR2-sensitive |
| GACAGAGCTCATGATCGTCGAGAC   | 0  | 19 | RDR2-sensitive |
| GACAGAGTGGGCTAACGACGACGG   | 47 | 4  | RDR2-resistant |
| GACAGAGTTAGACGTGTGGTAGAC   | 1  | 32 | RDR2-sensitive |
| GACAGAGTTAGACGTGTGGTAGAT   | 0  | 15 | RDR2-sensitive |
| GACAGCCGTCGACGGGAGCGGGAT   | 0  | 10 | RDR2-sensitive |
| GACAGCGCGGCAGGTAGCTCGGCG   | 0  | 16 | RDR2-sensitive |
| GACAGCTAGGATTGAGACGTCCGA   | 0  | 27 | RDR2-sensitive |
| GACAGCTCTGAGGAGATTCTGGTG   | 0  | 10 | RDR2-sensitive |
| GACAGCTGTAGAATCGCGGGCGTC   | 0  | 10 | RDR2-sensitive |
| GACAGGAAACTAGGCACGGCGGGC   | 3  | 28 | RDR2-sensitive |
| GACAGGAAGCTGATCGACGTCCGAG  | 0  | 10 | RDR2-sensitive |
| GACAGGACGGCAAGCGGTGAGCAG   | 0  | 20 | RDR2-sensitive |
| GACAGGACTAAGAAACGGCGGAAC   | 0  | 13 | RDR2-sensitive |
| GACAGGACTGACTGGCAGACTGGC   | 4  | 22 | RDR2-sensitive |
| GACAGGATTTGTAGCGCATGCCAG   | 2  | 17 | RDR2-sensitive |
| GACAGGCACTGTAGGCTATCCGGT   | 0  | 10 | RDR2-sensitive |
| GACAGGCACTGTAGGCTGTCCGGT   | 0  | 10 | RDR2-sensitive |

|                           |    |    |                |
|---------------------------|----|----|----------------|
| GACAGGCCTGTCGTA CTGGGTCGG | 0  | 16 | RDR2-sensitive |
| GACAGGGATTGTGCTCGAAGGCGG  | 0  | 20 | RDR2-sensitive |
| GACAGGTATGAAGTGGGCTGACTT  | 1  | 12 | RDR2-sensitive |
| GACAGGTCACGGAGCGGTATAAGG  | 19 | 1  | RDR2-resistant |
| GACAGGTTTCGACGACTTGACGGTA | 0  | 9  | RDR2-sensitive |
| GACAGGTTTCGTCGTGCCTCCGGCC | 0  | 13 | RDR2-sensitive |
| GACAGTAATGGACGGTCATCACTC  | 0  | 15 | RDR2-sensitive |
| GACAGTAGATCGGACGGTCCGCAA  | 0  | 19 | RDR2-sensitive |
| GACAGTCACATATAGCCGTCCGGAC | 0  | 14 | RDR2-sensitive |
| GACAGTCACTGTAGACGGTCCGGT  | 2  | 30 | RDR2-sensitive |
| GACAGTCACTGTAGATGGTCCGGT  | 0  | 11 | RDR2-sensitive |
| GACAGTCAGTCGGCGAGCTGGCAA  | 0  | 9  | RDR2-sensitive |
| GACAGTCGAGCAGGGGATGATGGG  | 0  | 19 | RDR2-sensitive |
| GACAGTCGATGTAGCAAGGCCAG   | 0  | 27 | RDR2-sensitive |
| GACAGTCGGGATACAGGTGGGGGC  | 0  | 13 | RDR2-sensitive |
| GACAGTCTGGTATAGTCCGTGCGC  | 0  | 12 | RDR2-sensitive |
| GACAGTGACAGGGGCGACGACAAG  | 94 | 20 | RDR2-resistant |
| GACAGTGACGAAGACAATGGCGGC  | 0  | 9  | RDR2-sensitive |
| GACAGTGCCACTGGAGATCGACGA  | 0  | 10 | RDR2-sensitive |
| GACAGTTGGCACTCCAGGTAGAGG  | 1  | 12 | RDR2-sensitive |
| GACAGTTTACTCGTCCGTCAGGG   | 1  | 25 | RDR2-sensitive |
| GACAGTTTCCTAGGCCGTCTCGG   | 0  | 10 | RDR2-sensitive |
| GACATAATGGGTCAGAGGACACTT  | 0  | 14 | RDR2-sensitive |
| GACATAGGGTTCGGACGGTCCACGG | 0  | 11 | RDR2-sensitive |
| GACATAGGTA CTGTGGATCGGCCT | 0  | 91 | RDR2-sensitive |
| GACATATATTATTCGTGTCGGAC   | 0  | 9  | RDR2-sensitive |
| GACATCACCTTCAGGTCTGTGG    | 0  | 26 | RDR2-sensitive |
| GACATCGACGTAGAGGAAGCAGAC  | 0  | 9  | RDR2-sensitive |
| GACATCGGGCGACGGATCCGGCTT  | 2  | 30 | RDR2-sensitive |
| GACATCTAGGACCACGACGGACAC  | 0  | 15 | RDR2-sensitive |
| GACATCTGGGAAGGCTGGACGGTC  | 1  | 13 | RDR2-sensitive |
| GACATGAGGACGACGACGAGCGAC  | 0  | 14 | RDR2-sensitive |
| GACATGCGGTGTGGACGAAGATGC  | 0  | 11 | RDR2-sensitive |
| GACATGGACATCTGGAGGCGACAT  | 1  | 17 | RDR2-sensitive |
| GACATGGACTGTAGGAGCGGGGTT  | 1  | 40 | RDR2-sensitive |
| GACATGGCACGTAGTGAACCGGAC  | 0  | 9  | RDR2-sensitive |
| GACATGTACTGTAGAGTGTCCGGT  | 19 | 56 | RDR2-sensitive |
| GACATGTCCCGACGATCGACGGA   | 0  | 11 | RDR2-sensitive |
| GACATGTCTGTGCTCGTGACGGACC | 0  | 10 | RDR2-sensitive |
| GACATGTGGGACTGAGAGGTGGGC  | 0  | 17 | RDR2-sensitive |
| GACATTCGTGGCAACGCACGGGCA  | 0  | 9  | RDR2-sensitive |
| GACATTCTAACGGCTGGTCTCGGT  | 33 | 3  | RDR2-resistant |
| GACATTTCACTCGTCCGCCAGGG   | 1  | 23 | RDR2-sensitive |
| GACATTTCACTCGTCCGCCAGGG   | 0  | 16 | RDR2-sensitive |
| GACCAACAGCGGACTGGAACGGC   | 0  | 75 | RDR2-sensitive |
| GACCAACCGTAGATCGTTGAGGGC  | 0  | 11 | RDR2-sensitive |
| GACCAACGACGACAGTGAGGACGC  | 0  | 9  | RDR2-sensitive |
| GACCAAGGCTCTGTCAAGTCTGC   | 0  | 12 | RDR2-sensitive |
| GACCACAGTCGTGTGCTGACGCGG  | 0  | 9  | RDR2-sensitive |

|                           |    |     |                |
|---------------------------|----|-----|----------------|
| GACCACCAGCATGGCGTCGGCGGC  | 1  | 12  | RDR2-sensitive |
| GACCACCCCATGATCGAAGCGGAG  | 0  | 40  | RDR2-sensitive |
| GACCACGTCGACAGAAGCGGAACA  | 0  | 46  | RDR2-sensitive |
| GACCACGTTCCGGCTCGTCTGGCTG | 1  | 16  | RDR2-sensitive |
| GACCACTGAACCGGACGTTGGCGC  | 2  | 52  | RDR2-sensitive |
| GACCAGACCGTAGAGGAAGGCGTT  | 0  | 26  | RDR2-sensitive |
| GACCAGAGACTGTAAATGTGGCGA  | 0  | 21  | RDR2-sensitive |
| GACCAGAGAGCACCCGCCCGGTT   | 0  | 16  | RDR2-sensitive |
| GACCAGATCGACGGCAACACACTT  | 0  | 9   | RDR2-sensitive |
| GACCAGCACGACAGACGAACTAAG  | 0  | 51  | RDR2-sensitive |
| GACCAGCACGACGGACGAACTAAG  | 2  | 106 | RDR2-sensitive |
| GACCAGCGACTGCAGCGAAGGCCT  | 1  | 53  | RDR2-sensitive |
| GACCAGCGGCTGCAGCGAAGGCCT  | 0  | 9   | RDR2-sensitive |
| GACCAGGACGACATATATGGACGA  | 0  | 10  | RDR2-sensitive |
| GACCAGGGGTTGTAGAACGACGGC  | 0  | 10  | RDR2-sensitive |
| GACCAGGTCGAAGGGCAGGGGCAC  | 0  | 19  | RDR2-sensitive |
| GACCAGTCTGACAGAAGGACAGCG  | 3  | 16  | RDR2-sensitive |
| GACCATAATTAGGGGTACCCTCAA  | 0  | 9   | RDR2-sensitive |
| GACCATCTGGGCTAGGACACGCGG  | 0  | 11  | RDR2-sensitive |
| GACCATGAACCGAGCGAGCCAGCG  | 0  | 12  | RDR2-sensitive |
| GACCATGGACGAGCAGAACGCCGG  | 0  | 10  | RDR2-sensitive |
| GACCATGTTCAAGTGATTGCTCGG  | 2  | 24  | RDR2-sensitive |
| GACCATGTTCAAGTGATTGTTCCGG | 1  | 14  | RDR2-sensitive |
| GACCCAATCTTGGTCGTTCTGG    | 0  | 11  | RDR2-sensitive |
| GACCCAATTGTAGTCGGATGGCGA  | 1  | 13  | RDR2-sensitive |
| GACCCAGGGACGCAGCCTCACATA  | 0  | 9   | RDR2-sensitive |
| GACCCATATTGTTTCGTGTCGGGC  | 0  | 20  | RDR2-sensitive |
| GACCCATCTGGGCTGGGACACGCA  | 0  | 14  | RDR2-sensitive |
| GACCCATCTGGGCTGGGGCACGCA  | 0  | 9   | RDR2-sensitive |
| GACCCCTGGCTGCAGATCGTTCGC  | 1  | 113 | RDR2-sensitive |
| GACCCGAATGGTCGTTGTATCGT   | 0  | 10  | RDR2-sensitive |
| GACCCGCGGGCTGGCTGACATGGC  | 0  | 9   | RDR2-sensitive |
| GACCCGGAAGACGGCGAACTCCGC  | 25 | 211 | RDR2-sensitive |
| GACCCGGACCCGCATAGAATCGGA  | 0  | 15  | RDR2-sensitive |
| GACCCGGACTAAACTTTAGCAGGA  | 0  | 9   | RDR2-sensitive |
| GACCCGGAGTAGAGCTGCGGCTGC  | 0  | 9   | RDR2-sensitive |
| GACCCGGCACGGATATGACTCGGC  | 0  | 9   | RDR2-sensitive |
| GACCCGGCTGAAAGACGTACCCAT  | 0  | 20  | RDR2-sensitive |
| GACCCGGGCTAAACTTTAGCAGAA  | 0  | 13  | RDR2-sensitive |
| GACCCGGGCTAAACTTTAGCAGAG  | 0  | 9   | RDR2-sensitive |
| GACCCGGGCTAAACTTTAGCAGGA  | 1  | 59  | RDR2-sensitive |
| GACCCGTGAGTAGGACTAGGCATT  | 0  | 23  | RDR2-sensitive |
| GACCCGTTGTCCGAGATCTCGGGC  | 0  | 12  | RDR2-sensitive |
| GACCCGTTTAACTGTGGGCGTGCG  | 0  | 11  | RDR2-sensitive |
| GACCCTAAGCCACAGATCGTTCGT  | 0  | 58  | RDR2-sensitive |
| GACCCTGTATACTGGACGGTCCGC  | 0  | 14  | RDR2-sensitive |
| GACCCTGTCCGAGGTCGCGGACC   | 0  | 13  | RDR2-sensitive |
| GACCGAAGACTGGAGCGAGCAGGG  | 0  | 9   | RDR2-sensitive |
| GACCGACACGTAGAGGATGCTGTA  | 0  | 16  | RDR2-sensitive |



|                            |    |     |                |
|----------------------------|----|-----|----------------|
| GACCGACACGTAGAGGGCGCTGTA   | 1  | 168 | RDR2-sensitive |
| GACCGACACGTAGGAGGGCGCTGTA  | 2  | 94  | RDR2-sensitive |
| GACCGACACGTAGGGGACGCTGTA   | 2  | 126 | RDR2-sensitive |
| GACCGACACGTAGGGGGCGCTGTA   | 10 | 148 | RDR2-sensitive |
| GACCGACATGGACCGATGAGGCAC   | 0  | 10  | RDR2-sensitive |
| GACCGACATGTAGGGGGCGCTGTA   | 1  | 50  | RDR2-sensitive |
| GACCGACGCGTAGAGGGCGCTGTA   | 0  | 34  | RDR2-sensitive |
| GACCGACGCGTAGGAGGGCGCTGTA  | 0  | 11  | RDR2-sensitive |
| GACCGACTACTGTAGCTCACGGGC   | 0  | 17  | RDR2-sensitive |
| GACCGACTGTAAAATTTTATCGGT   | 0  | 13  | RDR2-sensitive |
| GACCGAGGCAATAGGACGCAGGCT   | 0  | 14  | RDR2-sensitive |
| GACCGAGGCTCGTTGGGAAGACTT   | 0  | 26  | RDR2-sensitive |
| GACCGAGTGACAGGTACCGTCGGA   | 0  | 9   | RDR2-sensitive |
| GACCGATACGTAGGGGACGTGGTA   | 0  | 10  | RDR2-sensitive |
| GACCGATTTCGGACTTTTTCGGTGTC | 0  | 9   | RDR2-sensitive |
| GACCGCACTGCTCGAGGACATGGA   | 0  | 9   | RDR2-sensitive |
| GACCGCAGTGCCGACTCGGACGG    | 0  | 10  | RDR2-sensitive |
| GACCGCATGCGTCGCTGTGTTCCGG  | 0  | 15  | RDR2-sensitive |
| GACCGCGCCTGTAGACCGGACGGT   | 1  | 30  | RDR2-sensitive |
| GACCGCGGACGGTAAAACACGGAC   | 0  | 13  | RDR2-sensitive |
| GACCGCGGAGACATCGGAACACGG   | 0  | 14  | RDR2-sensitive |
| GACCGCGGAGTAGGGAGACAGACG   | 0  | 10  | RDR2-sensitive |
| GACCGCGGGCTGGGCACGTGTGGC   | 0  | 18  | RDR2-sensitive |
| GACCGCGTTGGAGGAGTCGGCAGC   | 0  | 10  | RDR2-sensitive |
| GACCGCTCGAGGACTATTGGCGTG   | 0  | 13  | RDR2-sensitive |
| GACCGGACACAGACGACGATGCAG   | 0  | 9   | RDR2-sensitive |
| GACCGGACACCTTCAGACGGAGAC   | 0  | 21  | RDR2-sensitive |
| GACCGGACAGTCTAGAACGGGCAC   | 0  | 14  | RDR2-sensitive |
| GACCGGACTTAGATCGGTATGGTC   | 0  | 12  | RDR2-sensitive |
| GACCGGATGGAACCGGCCCTGCG    | 0  | 13  | RDR2-sensitive |
| GACCGGATGTCAGAGGCACAAGAA   | 0  | 10  | RDR2-sensitive |
| GACCGGATTAGTAGGCTAGATGGT   | 2  | 16  | RDR2-sensitive |
| GACCGGCATGTAGATGTGGCCAG    | 3  | 61  | RDR2-sensitive |
| GACCGGCCTGACAAGAGGACAGCG   | 1  | 18  | RDR2-sensitive |
| GACCGGCCTGACAGAAAGACAGCG   | 2  | 33  | RDR2-sensitive |
| GACCGGCCTGACAGAAGGACAGCG   | 10 | 141 | RDR2-sensitive |
| GACCGGCGACGACAGTGAGGACGA   | 0  | 10  | RDR2-sensitive |
| GACCGGCGCGTAGGAGACGCTGTA   | 0  | 10  | RDR2-sensitive |
| GACCGGCGTCGGTGTCTTCGGAT    | 0  | 9   | RDR2-sensitive |
| GACCGGGCGTGGACGGAATTCGGT   | 9  | 43  | RDR2-sensitive |
| GACCGGTCAGTGGAGCGGCGAAGT   | 0  | 13  | RDR2-sensitive |
| GACCGGTCGGAAAGTCTTGGGCAC   | 0  | 16  | RDR2-sensitive |
| GACCGGTCGGAGAACGTGGATGGT   | 0  | 15  | RDR2-sensitive |
| GACCGGTCTGACAAGAGGACAGCG   | 1  | 50  | RDR2-sensitive |
| GACCGGTCTGACAGAAGGACAGCG   | 14 | 115 | RDR2-sensitive |
| GACCGGTGGATAGACGCATCTGTG   | 29 | 0   | RDR2-resistant |
| GACCGGTTTGGTGGGATCGTTGAG   | 0  | 15  | RDR2-sensitive |
| GACCGTATCGGGGGCTCGACGGAC   | 0  | 28  | RDR2-sensitive |
| GACCGTATGTGACTGGTAACGGAC   | 0  | 18  | RDR2-sensitive |

|                           |    |    |                |
|---------------------------|----|----|----------------|
| GACCGTCACTGTTAGTAGCAGCAT  | 0  | 14 | RDR2-sensitive |
| GACCGTCCGGACCACAGACGCGGA  | 0  | 17 | RDR2-sensitive |
| GACCGTCCGGTCTGTAGGCGCGGA  | 0  | 43 | RDR2-sensitive |
| GACCGTCCGACGGCATCCTCAGATC | 0  | 15 | RDR2-sensitive |
| GACCGTCCGATCTAGGACCACGGAT | 0  | 11 | RDR2-sensitive |
| GACCGTCCGGTGAACGAAACGTCAT | 0  | 37 | RDR2-sensitive |
| GACCGTCTGGCCTGTAGGCGCGGA  | 0  | 14 | RDR2-sensitive |
| GACCGTGCCGGGCCGTGTTTGGAC  | 1  | 18 | RDR2-sensitive |
| GACCGTGCTATGCAATATCGTCGG  | 0  | 10 | RDR2-sensitive |
| GACCGTGGATATGATTGTGGGCGG  | 0  | 9  | RDR2-sensitive |
| GACCGTGTAGAATAGAGGACGCGA  | 0  | 19 | RDR2-sensitive |
| GACCGTTAGGGTTCGACCGTTGGA  | 2  | 17 | RDR2-sensitive |
| GACCGTTGGATGGAAAATGGACGG  | 0  | 25 | RDR2-sensitive |
| GACCGTTTAGAGGACGCTGCTGAA  | 0  | 12 | RDR2-sensitive |
| GACCGTTTAGAGGACGCTGCTGGA  | 0  | 20 | RDR2-sensitive |
| GACCGTTTAGAGGACGTTGCTGGA  | 0  | 28 | RDR2-sensitive |
| GACCTAACACTAGGCACACGTCGG  | 0  | 13 | RDR2-sensitive |
| GACCTAATATATGTCGTGTCGGAC  | 0  | 9  | RDR2-sensitive |
| GACCTACTCCTCGGACTGCGGCAC  | 0  | 27 | RDR2-sensitive |
| GACCTAGAACCGGACGGTCCACGC  | 0  | 9  | RDR2-sensitive |
| GACCTAGACCTGCATAGAACCGGA  | 0  | 13 | RDR2-sensitive |
| GACCTAGCTGTAGGGGCGGCTCCT  | 0  | 9  | RDR2-sensitive |
| GACCTAGGCGTAGAAGCGGCTCCT  | 0  | 9  | RDR2-sensitive |
| GACCTAGTACTTGTAGAAGGGCAC  | 0  | 9  | RDR2-sensitive |
| GACCTATGGTAGACTGTACGGTGA  | 0  | 38 | RDR2-sensitive |
| GACCTATTTTCTATCGTACCGGGC  | 0  | 49 | RDR2-sensitive |
| GACCTCAGCTGTAGACGGCCGCTA  | 2  | 18 | RDR2-sensitive |
| GACCTCGCTGTAGGAGCGGCTCTT  | 0  | 28 | RDR2-sensitive |
| GACCTCGGAAGACGGACTCCGCCT  | 1  | 17 | RDR2-sensitive |
| GACCTCGGACGACGGTCTCCGCCT  | 0  | 9  | RDR2-sensitive |
| GACCTCTCAGGACAAAGTCGGTAT  | 0  | 18 | RDR2-sensitive |
| GACCTCTCGGTGGTTGTCTCGGTC  | 33 | 1  | RDR2-resistant |
| GACCTGAAGGCGGATCTAGACCAG  | 0  | 13 | RDR2-sensitive |
| GACCTGATCATGTTGGACGGGCCG  | 0  | 18 | RDR2-sensitive |
| GACCTGCAACGGGCCGAACCTCGGA | 1  | 16 | RDR2-sensitive |
| GACCTGGACATCTGGAGACGACAT  | 0  | 9  | RDR2-sensitive |
| GACCTGGACGCGGGACGAACACGA  | 0  | 10 | RDR2-sensitive |
| GACCTGGGCGCGGGACGAACACGA  | 2  | 36 | RDR2-sensitive |
| GACCTGGGCGTAGGAGCGGCTCCT  | 0  | 18 | RDR2-sensitive |
| GACCTGGGCGTAGGAGCGGTGTCT  | 0  | 10 | RDR2-sensitive |
| GACCTGGTGCTTCGGCTGCGGCAA  | 0  | 10 | RDR2-sensitive |
| GACCTGGTTGGACCGCATTGGCAC  | 0  | 18 | RDR2-sensitive |
| GACCTGTAGATTGAACTAGGTCGG  | 0  | 10 | RDR2-sensitive |
| GACCTGTAGGCGCGGATCGTCCGG  | 2  | 17 | RDR2-sensitive |
| GACCTGTGACTGGCAAACAACATC  | 0  | 9  | RDR2-sensitive |
| GACCTGTGGACCTTTTTGTCGGC   | 0  | 13 | RDR2-sensitive |
| GACCTGTTCTGACGGTCATCGGAC  | 0  | 20 | RDR2-sensitive |
| GACCTTCAGACGTAGGGCGGCTAT  | 1  | 32 | RDR2-sensitive |
| GACCTTCCCAAGGTTTGATCGCGG  | 0  | 12 | RDR2-sensitive |

|                          |    |    |                |
|--------------------------|----|----|----------------|
| GACCTTCTGGCCGCGGATCGTCTG | 0  | 13 | RDR2-sensitive |
| GACCTTGAAGCCGGCGCGGTAGAG | 0  | 9  | RDR2-sensitive |
| GACCTTGTTGGAGGCGTAGAGGAC | 0  | 25 | RDR2-sensitive |
| GACCTTTCGGCACTGGGCAGGCGT | 0  | 20 | RDR2-sensitive |
| GACCTTTTCCCGGTCGTTGCACTG | 19 | 1  | RDR2-resistant |
| GACGAAACTGTGAGTCACTCGGT  | 78 | 9  | RDR2-resistant |
| GACGAAATACTCGTGGCTCGCTGG | 0  | 9  | RDR2-sensitive |
| GACGAAATGCTCGTGGCTCGCTGG | 1  | 12 | RDR2-sensitive |
| GACGAACACGAAGGCCGCGGGATT | 2  | 19 | RDR2-sensitive |
| GACGAACAGACGTAGATGGACGAC | 0  | 9  | RDR2-sensitive |
| GACGAACAGAGACGAGAGAGCCAG | 2  | 16 | RDR2-sensitive |
| GACGAACAGCAAGCTGTGAACGAA | 0  | 10 | RDR2-sensitive |
| GACGAACAGCAAGCTGTGGACGAT | 1  | 31 | RDR2-sensitive |
| GACGAACAGGGCAACAGACGAACA | 0  | 32 | RDR2-sensitive |
| GACGAACAGTAGGAGGAGGAGCAT | 0  | 18 | RDR2-sensitive |
| GACGAACCCGGGACCTGGAGATGC | 0  | 15 | RDR2-sensitive |
| GACGAACCGAACGCGCTGCGACGA | 1  | 12 | RDR2-sensitive |
| GACGAACCGCGGAACAGGATTCGG | 0  | 18 | RDR2-sensitive |
| GACGAACCGCGGAAGCCGGAGCTC | 0  | 19 | RDR2-sensitive |
| GACGAACCGGCTGGAACAGTAGAA | 0  | 13 | RDR2-sensitive |
| GACGAACGGACGGCTTAGATTGGC | 1  | 34 | RDR2-sensitive |
| GACGAACGGACGGTCTAGATTGGT | 0  | 17 | RDR2-sensitive |
| GACGAACGTAGAAGCGCAGTGCAG | 1  | 29 | RDR2-sensitive |
| GACGAACGTTGGCGCGACAGACAC | 0  | 9  | RDR2-sensitive |
| GACGAACTCCAAGCGGCCAGCCA  | 0  | 17 | RDR2-sensitive |
| GACGAACTCGTCGCTCTCGGGAAA | 0  | 11 | RDR2-sensitive |
| GACGAACTCTAACGTGGCTTCGGC | 0  | 12 | RDR2-sensitive |
| GACGAACTGGCGTGCGAAGACGAC | 0  | 11 | RDR2-sensitive |
| GACGAAGACCGGATGTAGAGACGT | 0  | 9  | RDR2-sensitive |
| GACGAAGACCGGCGACGAAGGCAT | 3  | 18 | RDR2-sensitive |
| GACGAAGACCTAGGCATCTGGAGG | 0  | 10 | RDR2-sensitive |
| GACGAAGACGACCAGAGCTGGCAT | 0  | 50 | RDR2-sensitive |
| GACGAAGACGGACGAAGACGACCT | 0  | 17 | RDR2-sensitive |
| GACGAAGACGTGCGGGAGGGACGA | 2  | 41 | RDR2-sensitive |
| GACGAAGCAGAGACTTGAGGACGA | 0  | 15 | RDR2-sensitive |
| GACGAAGGACAGACGAACAGACGT | 0  | 12 | RDR2-sensitive |
| GACGAAGGCTGGAGCGAAGGGTAG | 0  | 9  | RDR2-sensitive |
| GACGAATCGGGACCGCATTGGCAC | 0  | 13 | RDR2-sensitive |
| GACGAATCTGTACCGTCGACTCGC | 0  | 16 | RDR2-sensitive |
| GACGACAACGGTGGAGGCTGCATG | 0  | 12 | RDR2-sensitive |
| GACGACAAGACTCATCGGCAGCAG | 1  | 30 | RDR2-sensitive |
| GACGACAAGGACAGCAACCTCAAG | 0  | 16 | RDR2-sensitive |
| GACGACACAATGAGGTGAACACGG | 0  | 9  | RDR2-sensitive |
| GACGACACGCGGAACGACGACGAG | 0  | 67 | RDR2-sensitive |
| GACGACACTACGGACGGTGAAGAT | 2  | 19 | RDR2-sensitive |
| GACGACACTCTGCGCCATCACGGA | 0  | 17 | RDR2-sensitive |
| GACGACACTGGTGGCTCGACGGAC | 0  | 9  | RDR2-sensitive |
| GACGACACTGTAGGTGCGGCGACA | 1  | 26 | RDR2-sensitive |
| GACGACAGACAGACAGTTGAGCAT | 0  | 13 | RDR2-sensitive |

|                           |     |    |                |
|---------------------------|-----|----|----------------|
| GACGACAGACGGCGTCTGAGCACG  | 2   | 25 | RDR2-sensitive |
| GACGACAGGAACGTGCTGGCGGAT  | 0   | 11 | RDR2-sensitive |
| GACGACAGGGGAATATCGAGACGG  | 0   | 10 | RDR2-sensitive |
| GACGACAGTAGACACACAGACGTG  | 1   | 35 | RDR2-sensitive |
| GACGACAGTAGACACAGAGACGTG  | 0   | 34 | RDR2-sensitive |
| GACGACAGTGAGGACGAGACTGGC  | 0   | 18 | RDR2-sensitive |
| GACGACATAGGTCGTGTGGGCTGT  | 0   | 9  | RDR2-sensitive |
| GACGACATCGTTATCTCCGGACGG  | 0   | 18 | RDR2-sensitive |
| GACGACCATGGATTCTCGGGCGGC  | 4   | 79 | RDR2-sensitive |
| GACGACCCAGTAGAAGGCCCGTGA  | 0   | 10 | RDR2-sensitive |
| GACGACCCTGGACCTGGAGTGGTG  | 0   | 10 | RDR2-sensitive |
| GACGACCGAAGACTTGGGCGGGCA  | 0   | 14 | RDR2-sensitive |
| GACGACCTCAGCTGTAGACGGCCG  | 1   | 13 | RDR2-sensitive |
| GACGACGAACTTGGACGATGGCAA  | 0   | 14 | RDR2-sensitive |
| GACGACGAAGAACCAGATCGGTGT  | 0   | 13 | RDR2-sensitive |
| GACGACGACGACGACGAAGGCCGT  | 23  | 1  | RDR2-resistant |
| GACGACGAGAAGAAGCTTGGCGAC  | 0   | 12 | RDR2-sensitive |
| GACGACGAGCTGGGCAGGATCCGA  | 0   | 15 | RDR2-sensitive |
| GACGACGAGGACGCCGCCAACATC  | 47  | 8  | RDR2-resistant |
| GACGACGAGGACTGGCGCGTGGTC  | 0   | 17 | RDR2-sensitive |
| GACGACGATATAGGAGGGTGGCAT  | 0   | 9  | RDR2-sensitive |
| GACGACGATGAATCTGAGGCCGGC  | 0   | 9  | RDR2-sensitive |
| GACGACGCACAGAATGACGATGAT  | 0   | 11 | RDR2-sensitive |
| GACGACGCACGGAATGACGACGGA  | 0   | 16 | RDR2-sensitive |
| GACGACGCAGGACAGAGTGTGGAT  | 0   | 9  | RDR2-sensitive |
| GACGACGCAGGAGCTCTCCGGCAC  | 0   | 10 | RDR2-sensitive |
| GACGACGCGGCACGACAAGCTGGA  | 0   | 10 | RDR2-sensitive |
| GACGACGCTGTAGTGAGTTGCAA   | 0   | 21 | RDR2-sensitive |
| GACGACGGCGACGACGACGACGGT  | 29  | 0  | RDR2-resistant |
| GACGACGTAGAGCAGAAGAGAGAT  | 0   | 14 | RDR2-sensitive |
| GACGACGTAGAGCCGAAGAGAGGT  | 0   | 11 | RDR2-sensitive |
| GACGACGTGGACAGCGGACGCCAA  | 0   | 9  | RDR2-sensitive |
| GACGACTCGACGACGAGCTGGGCA  | 0   | 18 | RDR2-sensitive |
| GACGACTCGACGGTAAACACGAAC  | 0   | 11 | RDR2-sensitive |
| GACGACTCGACGGTAAACCGCAAC  | 2   | 42 | RDR2-sensitive |
| GACGACTCGACTGTGAACGGCGCA  | 0   | 15 | RDR2-sensitive |
| GACGACTCGTCCGAGCTTAGACGA  | 0   | 9  | RDR2-sensitive |
| GACGACTGAGATGCAGAACACGGT  | 0   | 15 | RDR2-sensitive |
| GACGACTGATTCGGAACGGAGGCG  | 0   | 19 | RDR2-sensitive |
| GACGACTGCAACGGCAAACCTCTAC | 0   | 30 | RDR2-sensitive |
| GACGACTGCACGGCACTGCTCGAC  | 113 | 44 | RDR2-resistant |
| GACGACTGCTTTGACCGAGAGGAA  | 0   | 13 | RDR2-sensitive |
| GACGACTGGGACTCTGGGAGTGGC  | 0   | 10 | RDR2-sensitive |
| GACGACTGGGAGATTGCATGTTAT  | 0   | 11 | RDR2-sensitive |
| GACGACTGGTAACAGAGACGACGC  | 0   | 14 | RDR2-sensitive |
| GACGACTGTACAGATTACGCCACA  | 0   | 12 | RDR2-sensitive |
| GACGACTGTACAGATTACGCCGCA  | 0   | 57 | RDR2-sensitive |
| GACGACTGTACAGATTGCGCCACA  | 0   | 24 | RDR2-sensitive |
| GACGACTGTAGATGGTGACGGGC   | 0   | 11 | RDR2-sensitive |

|                           |    |    |                |
|---------------------------|----|----|----------------|
| GACGACTGTAGCAAATGGTTCGT   | 7  | 85 | RDR2-sensitive |
| GACGACTGTAGGAAGCCGTCGGAT  | 4  | 64 | RDR2-sensitive |
| GACGACTGTATAGATTGCGTTGCA  | 0  | 14 | RDR2-sensitive |
| GACGACTGTGCGGTCTGGGGCATC  | 0  | 11 | RDR2-sensitive |
| GACGACTGTGTACGGCTACATCGA  | 0  | 56 | RDR2-sensitive |
| GACGACTGTTGGGGCGAAGGCCAA  | 0  | 10 | RDR2-sensitive |
| GACGAGACGAGGCAAACGACTGAC  | 0  | 17 | RDR2-sensitive |
| GACGAGACGGTAACATCACGACGA  | 0  | 13 | RDR2-sensitive |
| GACGAGAGCGGTACTTCGGACAGA  | 0  | 15 | RDR2-sensitive |
| GACGAGAGGCAGAACAAACGGAAC  | 0  | 10 | RDR2-sensitive |
| GACGAGATGGATCTGTGACGGTAA  | 0  | 12 | RDR2-sensitive |
| GACGAGATTGTGTCTGGAGCGAGC  | 0  | 22 | RDR2-sensitive |
| GACGAGCATGTGGAGGAGGACAGT  | 0  | 14 | RDR2-sensitive |
| GACGAGCCTGTAGCATGCAACCGG  | 0  | 18 | RDR2-sensitive |
| GACGAGCGAAGGGTGGCGTCTCTG  | 0  | 15 | RDR2-sensitive |
| GACGAGCGGGCAGGATATGGAAGC  | 0  | 18 | RDR2-sensitive |
| GACGAGCGTCACACATGCGAACAG  | 0  | 9  | RDR2-sensitive |
| GACGAGCGTCGTGGCGTTGTCCGC  | 3  | 31 | RDR2-sensitive |
| GACGAGCTGCAGTTGGACATCCAT  | 0  | 13 | RDR2-sensitive |
| GACGAGGACCCGCAGCTGGACGTC  | 0  | 12 | RDR2-sensitive |
| GACGAGGACTGACGCGGAGGCCGA  | 4  | 58 | RDR2-sensitive |
| GACGAGGACTGGCGCGTGGTCAAC  | 0  | 9  | RDR2-sensitive |
| GACGAGGAGAAGCAGGCTTCTGAA  | 0  | 12 | RDR2-sensitive |
| GACGAGGAGAGGTAGACGTAECTA  | 27 | 62 | RDR2-sensitive |
| GACGAGGGTAGACACGAGCAGCAT  | 0  | 43 | RDR2-sensitive |
| GACGAGTTGACGACGGATCGCTGT  | 0  | 9  | RDR2-sensitive |
| GACGATAGTGTAGACCAGGCACAA  | 0  | 19 | RDR2-sensitive |
| GACGATCACGGTGGAGGACGAGGA  | 72 | 0  | RDR2-resistant |
| GACGATCAGGATTCAGGGGCAGGC  | 0  | 11 | RDR2-sensitive |
| GACGATCCACGTCAGGTAGTCGGA  | 0  | 9  | RDR2-sensitive |
| GACGATCCTGAACATGTCCGGCAG  | 0  | 30 | RDR2-sensitive |
| GACGATCGGGCAAGACAACGGATT  | 0  | 13 | RDR2-sensitive |
| GACGATCTGCAACCCTGGACCGGA  | 0  | 10 | RDR2-sensitive |
| GACGATCTGGTACTGCATCGGCCGT | 0  | 10 | RDR2-sensitive |
| GACGATCTTGTACTGCATCGGCCG  | 0  | 28 | RDR2-sensitive |
| GACGATGACCAACAGTAGGACGAC  | 0  | 12 | RDR2-sensitive |
| GACGATGACTGAAAGTAGGGACGT  | 0  | 17 | RDR2-sensitive |
| GACGATGACTGGAAGTAGGGACGT  | 1  | 30 | RDR2-sensitive |
| GACGATGAGGACATGGAGAGACGA  | 0  | 10 | RDR2-sensitive |
| GACGATGATCGGGAGCGGCTCCGT  | 0  | 13 | RDR2-sensitive |
| GACGATGCGACGGTAGATGGCGAC  | 0  | 42 | RDR2-sensitive |
| GACGATGCGGCGCAGCAGGACGAC  | 1  | 31 | RDR2-sensitive |
| GACGATGGCGCCAAGAAGACTGAT  | 1  | 45 | RDR2-sensitive |
| GACGATGTCGGCGTAGAGGAAGCA  | 0  | 9  | RDR2-sensitive |
| GACGATTGGACTCAGGACGGACGA  | 2  | 15 | RDR2-sensitive |
| GACGATTTGGAGGCGTAGGCCGAGC | 0  | 10 | RDR2-sensitive |
| GACGATTTGTCCGATTTATCTGGCA | 0  | 10 | RDR2-sensitive |
| GACGATTTTGGCCGTCGGAAGTCA  | 0  | 11 | RDR2-sensitive |
| GACGCAACGACGAACGACGACGAC  | 0  | 18 | RDR2-sensitive |

|                           |    |     |                |
|---------------------------|----|-----|----------------|
| GACGCAACGACGAACGACGACGAT  | 0  | 14  | RDR2-sensitive |
| GACGCAAGCTGTATGAGCGGATGT  | 0  | 9   | RDR2-sensitive |
| GACGCAAGGAATGAGGACGAGCAA  | 0  | 11  | RDR2-sensitive |
| GACGCAAGGACGACAGAGCAGAGA  | 0  | 9   | RDR2-sensitive |
| GACGCACGACGACCGTTGAAACTG  | 0  | 14  | RDR2-sensitive |
| GACGCACGGAACGACGACGAGATC  | 0  | 9   | RDR2-sensitive |
| GACGCACGTCGGCTAGAATAAGGC  | 0  | 11  | RDR2-sensitive |
| GACGCACTGTAAATTTAGCGGCAA  | 0  | 9   | RDR2-sensitive |
| GACGCAGACCAGCAAGAACGACGA  | 0  | 14  | RDR2-sensitive |
| GACGCAGAGCGGTTTCATGTAGAAC | 0  | 9   | RDR2-sensitive |
| GACGCAGAGGAGGACCGACAACAA  | 2  | 30  | RDR2-sensitive |
| GACGCAGGCGACAGACAAACTCCA  | 0  | 11  | RDR2-sensitive |
| GACGCATGACGACCGTTGAAACTG  | 1  | 19  | RDR2-sensitive |
| GACGCATGCGGGAGGTGGGCTGGC  | 0  | 11  | RDR2-sensitive |
| GACGCATGGTACGACGACGAGCTC  | 0  | 12  | RDR2-sensitive |
| GACGCCCGACTGTATTTTAGCGTA  | 0  | 18  | RDR2-sensitive |
| GACGCCCGGCTGTAGGGATGGTGC  | 0  | 18  | RDR2-sensitive |
| GACGCCCGGGCTGGATTCAGGCAG  | 0  | 11  | RDR2-sensitive |
| GACGCCTAGGTCTCGGATGCGGTC  | 2  | 43  | RDR2-sensitive |
| GACGCCTCTGAACGACGGAGATGT  | 0  | 10  | RDR2-sensitive |
| GACGCGAAGAACTTGGCGTAGACG  | 0  | 22  | RDR2-sensitive |
| GACGCGACTGACGGATAAGCCAAC  | 0  | 9   | RDR2-sensitive |
| GACGCGACTGTAGGCGTTGATGGC  | 5  | 122 | RDR2-sensitive |
| GACGCGAGGTAGAACAGGATCGGT  | 0  | 9   | RDR2-sensitive |
| GACGCGCAGGGCAGTGAAGACGT   | 0  | 12  | RDR2-sensitive |
| GACGCGCGAGGCAGAACACGGACT  | 0  | 10  | RDR2-sensitive |
| GACGCGCGGAACGACGACAAGATC  | 0  | 10  | RDR2-sensitive |
| GACGCGCGGAACGACGACAGTCAA  | 0  | 9   | RDR2-sensitive |
| GACGCGCGGAACGACGACGAGATC  | 0  | 84  | RDR2-sensitive |
| GACGCGCGGAATGACGACGAGATC  | 0  | 14  | RDR2-sensitive |
| GACGCGCTGTAGGTTTCGGTGGCGT | 0  | 9   | RDR2-sensitive |
| GACGCGGAAACGAGCATGCTGGCA  | 0  | 13  | RDR2-sensitive |
| GACGCGGAGGCAGAACATGGTGTA  | 0  | 9   | RDR2-sensitive |
| GACGCGGATAGGACAACAGCGGCT  | 3  | 16  | RDR2-sensitive |
| GACGCGGATAGGACAACGATGGTT  | 0  | 40  | RDR2-sensitive |
| GACGCGGATAGGACAACGGTGGTT  | 0  | 39  | RDR2-sensitive |
| GACGCGTAGGACGTAACCCGGTAG  | 0  | 16  | RDR2-sensitive |
| GACGCGTGTAGAAGGGCGGACCAG  | 0  | 9   | RDR2-sensitive |
| GACGCTACTGAAGACGACGTTCCC  | 14 | 0   | RDR2-resistant |
| GACGCTATAGACAACCCCCGGCG   | 29 | 1   | RDR2-resistant |
| GACGCTATCTGTACAGTCGTCGGA  | 0  | 41  | RDR2-sensitive |
| GACGCTCGGACTAGTGCGGCTGA   | 0  | 13  | RDR2-sensitive |
| GACGCTCTGGATGCGGCAGAACCG  | 0  | 10  | RDR2-sensitive |
| GACGCTGACGACGAGGACTGGCGC  | 0  | 13  | RDR2-sensitive |
| GACGCTGCTGGAGACGGAGAATAT  | 1  | 20  | RDR2-sensitive |
| GACGCTGGACGCAGGAAGCAGAAC  | 0  | 21  | RDR2-sensitive |
| GACGCTGGCAAGGAACACGGGCGC  | 24 | 3   | RDR2-resistant |
| GACGCTGGCACGGTCGGACGGCTT  | 0  | 11  | RDR2-sensitive |
| GACGCTGTAGAGATAGACCCGCAG  | 0  | 9   | RDR2-sensitive |

|                           |    |    |                |
|---------------------------|----|----|----------------|
| GACGCTGTAGTGGCTCAGGCACGG  | 0  | 11 | RDR2-sensitive |
| GACGCTGTGTAGAGCATGGGTGGT  | 0  | 40 | RDR2-sensitive |
| GACGCTGTTATAGAAGGATGGCTT  | 0  | 12 | RDR2-sensitive |
| GACGCTGTTGTAGAATGTAGAGGA  | 0  | 10 | RDR2-sensitive |
| GACGCTTCTTCGTGCTGTCCGGCG  | 0  | 9  | RDR2-sensitive |
| GACGCTTGTAGGAATATGGGGCTA  | 0  | 10 | RDR2-sensitive |
| GACGGAAAACGGTAGACGGACGGT  | 0  | 9  | RDR2-sensitive |
| GACGGAAAACGGCGTGGGATGGCAA | 0  | 10 | RDR2-sensitive |
| GACGGAAAAGTAAGGGTACAGGCGT | 0  | 17 | RDR2-sensitive |
| GACGGAACGTGTAACGACGACGGT  | 0  | 12 | RDR2-sensitive |
| GACGGAAAGGGAAGGGAGCGGATCT | 2  | 29 | RDR2-sensitive |
| GACGGAAAGTCTCTCGAGGTCGGCT | 19 | 45 | RDR2-sensitive |
| GACGGAACTACTGCTCGCGGACGG  | 0  | 9  | RDR2-sensitive |
| GACGGACACCAAGCGGGGAGGCTC  | 0  | 17 | RDR2-sensitive |
| GACGGACATGCGATCGAACGCGGA  | 0  | 11 | RDR2-sensitive |
| GACGGACCACCCAACAAGACGCAT  | 0  | 13 | RDR2-sensitive |
| GACGGACCATGTCTGGTAGAAGAA  | 0  | 48 | RDR2-sensitive |
| GACGGACGAAC TAAGTCGCGAGGT | 0  | 12 | RDR2-sensitive |
| GACGGACGAAC TAAGTCGCGGCCA | 1  | 14 | RDR2-sensitive |
| GACGGACGAAC TAAGTCGTGACGA | 1  | 12 | RDR2-sensitive |
| GACGGACGAAC TAAGTTACGGCGA | 0  | 13 | RDR2-sensitive |
| GACGGACGCTAGCGGACGCGCGCT  | 0  | 12 | RDR2-sensitive |
| GACGGACGGCGTAATTCGGCGAG   | 0  | 23 | RDR2-sensitive |
| GACGGACGGCGTAATTCGGTGAG   | 0  | 9  | RDR2-sensitive |
| GACGGACGGTAGATAGCAGGCGGA  | 0  | 15 | RDR2-sensitive |
| GACGGACTGCCTGCAGGACAGCAG  | 0  | 16 | RDR2-sensitive |
| GACGGACTGGACGAGTGCAGCGGC  | 1  | 26 | RDR2-sensitive |
| GACGGAGACAAGAACGTCAGACGG  | 0  | 11 | RDR2-sensitive |
| GACGGAGACAAGAATACGACGCCA  | 0  | 12 | RDR2-sensitive |
| GACGGAGACAGAACGGGCAGTGAT  | 0  | 9  | RDR2-sensitive |
| GACGGAGACAGAGTTAGACGTGTG  | 0  | 28 | RDR2-sensitive |
| GACGGAGACGGAGTCTTTGCCGAG  | 0  | 22 | RDR2-sensitive |
| GACGGAGACTGAGCCAGACGGATG  | 0  | 28 | RDR2-sensitive |
| GACGGAGACTGAGTCAGACGAGTG  | 0  | 12 | RDR2-sensitive |
| GACGGAGAGAAGAATACGACGCCA  | 0  | 14 | RDR2-sensitive |
| GACGGAGAGTTGATGCAGATCTGA  | 1  | 14 | RDR2-sensitive |
| GACGGAGATCAGCAGAACGAGCAT  | 0  | 18 | RDR2-sensitive |
| GACGGAGATGGAGAACGCGACGGG  | 0  | 10 | RDR2-sensitive |
| GACGGAGCGGCAGAACACGATTGT  | 0  | 18 | RDR2-sensitive |
| GACGGAGCTGATGCGATGAAGGCG  | 0  | 18 | RDR2-sensitive |
| GACGGAGGACGAGAGTCAGGAGAA  | 0  | 9  | RDR2-sensitive |
| GACGGAGGACTCTGACAGGGGCGT  | 0  | 15 | RDR2-sensitive |
| GACGGAGGCTGAGTCAGACGTGTG  | 0  | 46 | RDR2-sensitive |
| GACGGAGTTAGACGAGTGGTGGAT  | 0  | 9  | RDR2-sensitive |
| GACGGAGTTAGACGGGTGACAGAC  | 0  | 19 | RDR2-sensitive |
| GACGGATACGGAGAGGAGAGAGAA  | 0  | 34 | RDR2-sensitive |
| GACGGATACGGATACAGAGACCGA  | 0  | 12 | RDR2-sensitive |
| GACGGATACGGATACAGGGACCGG  | 1  | 39 | RDR2-sensitive |
| GACGGATACGGGTATGGATACATA  | 0  | 14 | RDR2-sensitive |

|                           |    |     |                |
|---------------------------|----|-----|----------------|
| GACGGATCCAGAACAAGGGGGCTA  | 0  | 13  | RDR2-sensitive |
| GACGGATCGACGCGTACCTTCTCC  | 0  | 9   | RDR2-sensitive |
| GACGGATCTAGCTAGACGACGTAG  | 0  | 12  | RDR2-sensitive |
| GACGGATGACGGATAACAAGCGTTT | 0  | 12  | RDR2-sensitive |
| GACGGATGACGTGGTCTAGCTCGG  | 0  | 35  | RDR2-sensitive |
| GACGGATGACGTGTCAGACCTTAG  | 0  | 9   | RDR2-sensitive |
| GACGGATGAGCTCAACGACGTCAT  | 1  | 174 | RDR2-sensitive |
| GACGGATGATGTCTGAAGACGCCCT | 0  | 10  | RDR2-sensitive |
| GACGGATGCTAGTAGAATGGCATG  | 0  | 10  | RDR2-sensitive |
| GACGGATGCTGTGATGGTATTATG  | 0  | 9   | RDR2-sensitive |
| GACGGATGGCAGAACCACGGGGTG  | 0  | 10  | RDR2-sensitive |
| GACGGATGTAGAGGACGTTGCTGG  | 0  | 19  | RDR2-sensitive |
| GACGGATTTCGACAACTCGACGGCA | 2  | 28  | RDR2-sensitive |
| GACGGATTTCTCCTCGGCTCCGGC  | 3  | 19  | RDR2-sensitive |
| GACGGCAAACGACGAGAACGACGA  | 0  | 19  | RDR2-sensitive |
| GACGGCAACAAGTGGATATGACGA  | 0  | 11  | RDR2-sensitive |
| GACGGCAATATCAATCTGGCGATG  | 0  | 12  | RDR2-sensitive |
| GACGGCACGAACACCTGTGCAGAA  | 0  | 9   | RDR2-sensitive |
| GACGGCACTAGACAAACAGACGTG  | 0  | 21  | RDR2-sensitive |
| GACGGCACTAGACATACAGACGTG  | 0  | 16  | RDR2-sensitive |
| GACGGCACTCTAGTTGAAGAAGGT  | 23 | 1   | RDR2-resistant |
| GACGGCACTGCATAACGCGTCCAG  | 0  | 9   | RDR2-sensitive |
| GACGGCACTGGCGACTCGGCGGAC  | 1  | 12  | RDR2-sensitive |
| GACGGCACTGTACGGCAATAATAG  | 0  | 19  | RDR2-sensitive |
| GACGGCACTGTGGACGAAGCGGAA  | 0  | 10  | RDR2-sensitive |
| GACGGCACTTACAGCGACCATCCT  | 5  | 31  | RDR2-sensitive |
| GACGGCAGAACGGCAGAACAAAGAG | 0  | 9   | RDR2-sensitive |
| GACGGCAGCCTGAGAAGTCAGCAG  | 0  | 16  | RDR2-sensitive |
| GACGGCAGCGACTTGGGCGAGCAC  | 0  | 10  | RDR2-sensitive |
| GACGGCAGCGTACGCAGTTCTGAA  | 1  | 58  | RDR2-sensitive |
| GACGGCAGCGTACTCTAGCGAGA   | 1  | 25  | RDR2-sensitive |
| GACGGCAGTAGAGATGGCAATGGG  | 0  | 12  | RDR2-sensitive |
| GACGGCATGCAGGACAGACGACGT  | 3  | 44  | RDR2-sensitive |
| GACGGCATGCAGGGCAGACGACGT  | 0  | 17  | RDR2-sensitive |
| GACGGCATGTACTTAGGGCACTAG  | 3  | 17  | RDR2-sensitive |
| GACGGCATGTACTTAGGGCGCTAG  | 0  | 34  | RDR2-sensitive |
| GACGGCATGTCTACTAATGGGCAA  | 20 | 0   | RDR2-resistant |
| GACGGCCAAAGCTATCGGACACAA  | 0  | 27  | RDR2-sensitive |
| GACGGCCACCTTATCTCTGACGGC  | 0  | 10  | RDR2-sensitive |
| GACGGCCAGAAAACGACATGAGCG  | 0  | 20  | RDR2-sensitive |
| GACGGCCAGAGTAGAAGCACGACA  | 0  | 38  | RDR2-sensitive |
| GACGGCCCCTAGAAGATTGTCCGA  | 0  | 10  | RDR2-sensitive |
| GACGGCCGTTGGATGGAAAATGGA  | 1  | 22  | RDR2-sensitive |
| GACGGCCGTTGGATGGGAGACGGA  | 0  | 31  | RDR2-sensitive |
| GACGGCCCTACACTGTTTCCGACGG | 1  | 12  | RDR2-sensitive |
| GACGGCCTAGGAAACTGTCCGACA  | 0  | 10  | RDR2-sensitive |
| GACGGCCCTCGTCCGGCAGCATG   | 0  | 9   | RDR2-sensitive |
| GACGGCCCTGAGTAGGACGGTTGGC | 0  | 9   | RDR2-sensitive |
| GACGGCCCTGCACTAGTTCCGACGG | 0  | 9   | RDR2-sensitive |



|                           |     |    |                |
|---------------------------|-----|----|----------------|
| GACGGCCTGGGTAAGACGTGTCGT  | 0   | 15 | RDR2-sensitive |
| GACGGCCTTCAACTTGACGACGAG  | 0   | 9  | RDR2-sensitive |
| GACGGCCTTCAGCTTGACGACGAG  | 0   | 40 | RDR2-sensitive |
| GACGGCGAACGACATGACGACGAA  | 3   | 27 | RDR2-sensitive |
| GACGGCGAACGACGTGACGACGAA  | 0   | 10 | RDR2-sensitive |
| GACGGCGAAGTAACTACACCTCTA  | 0   | 9  | RDR2-sensitive |
| GACGGCGACTGTGGCACGCGGCAC  | 0   | 18 | RDR2-sensitive |
| GACGGCGCTGACGGCGTGAACCTA  | 0   | 17 | RDR2-sensitive |
| GACGGCGTCTGTACACGGGAACGG  | 29  | 0  | RDR2-resistant |
| GACGGCGTGCATGGACTCGGGTCA  | 0   | 9  | RDR2-sensitive |
| GACGGCGTTGTGGTGAATAGGAAA  | 3   | 66 | RDR2-sensitive |
| GACGGCTACAACCTATGGCACCATG | 125 | 0  | RDR2-resistant |
| GACGGCTACGACCTGGGCGAGCGC  | 0   | 13 | RDR2-sensitive |
| GACGGCTACTGTAGCCACGGGCC   | 0   | 22 | RDR2-sensitive |
| GACGGCTCCTCGGACGACGGCTGT  | 0   | 15 | RDR2-sensitive |
| GACGGCTCGCGTGCTTTGGCCCGG  | 0   | 11 | RDR2-sensitive |
| GACGGCTCGCTGTGCGTGAACCT   | 0   | 10 | RDR2-sensitive |
| GACGGCTCTAAGATTTTTTTGCAA  | 3   | 19 | RDR2-sensitive |
| GACGGCTGACCTGCTCGAGGACGG  | 0   | 21 | RDR2-sensitive |
| GACGGCTGACGGCACTTTACCGAT  | 0   | 10 | RDR2-sensitive |
| GACGGCTGACGGCGAGTGGACGGA  | 0   | 17 | RDR2-sensitive |
| GACGGCTGAGATCGCAGAACGGCA  | 1   | 23 | RDR2-sensitive |
| GACGGCTGAGATCGCAGAATGGCA  | 3   | 19 | RDR2-sensitive |
| GACGGCTGGCAGAAGCTTGTCTGC  | 0   | 9  | RDR2-sensitive |
| GACGGCTGGGGACGCAAGTAGGGA  | 0   | 15 | RDR2-sensitive |
| GACGGCTGTGACGGAGGGCGACCT  | 0   | 9  | RDR2-sensitive |
| GACGGCTGTGAGGAAAGAGAAGAA  | 0   | 9  | RDR2-sensitive |
| GACGGCTTACAACAATACCCACGT  | 0   | 11 | RDR2-sensitive |
| GACGGGAATTAACCTGGGCCGACGG | 1   | 12 | RDR2-sensitive |
| GACGGGACGGATACATGTACTACC  | 0   | 15 | RDR2-sensitive |
| GACGGGAGGCAGAACATGGTGCAC  | 0   | 30 | RDR2-sensitive |
| GACGGGAGGGAAGGGAGCGGATCT  | 2   | 51 | RDR2-sensitive |
| GACGGGAGGGAATGAAGCGGATCT  | 0   | 10 | RDR2-sensitive |
| GACGGGAGTGTAGAGGACGGGGCC  | 0   | 11 | RDR2-sensitive |
| GACGGGCACTCCTGGCAGAACCGT  | 2   | 57 | RDR2-sensitive |
| GACGGGCAGGATGAAGCAAAAGGA  | 0   | 13 | RDR2-sensitive |
| GACGGGCAGGTAGAGAGCGCGGAC  | 0   | 11 | RDR2-sensitive |
| GACGGGCCAAGAGAAGGACATGGC  | 0   | 17 | RDR2-sensitive |
| GACGGGCGCATGAACTACGGCGAG  | 0   | 17 | RDR2-sensitive |
| GACGGGCGCGCTGAGTACAATAGT  | 0   | 12 | RDR2-sensitive |
| GACGGGCGTAGATGCGTAGACGTG  | 0   | 9  | RDR2-sensitive |
| GACGGGCGTCAGCTTTAGAACGGC  | 0   | 12 | RDR2-sensitive |
| GACGGGCGTGAGAGAGGTGGAAT   | 5   | 19 | RDR2-sensitive |
| GACGGGCTCGACAATGATACGGAA  | 0   | 19 | RDR2-sensitive |
| GACGGGCTCGATGACGATACGGGA  | 0   | 9  | RDR2-sensitive |
| GACGGGCTGAAATTTAAAGCACGG  | 0   | 16 | RDR2-sensitive |
| GACGGGCTGACATTTAGAGCACGG  | 1   | 57 | RDR2-sensitive |
| GACGGGCTGACGGACTCACGGCTC  | 0   | 18 | RDR2-sensitive |
| GACGGGCTGCGGGATACCAAAGAG  | 0   | 16 | RDR2-sensitive |

|                           |    |    |                |
|---------------------------|----|----|----------------|
| GACGGGCTGCTGGACCAGCGTCCG  | 0  | 12 | RDR2-sensitive |
| GACGGGCTTCTAGGTAAACGGATC  | 0  | 12 | RDR2-sensitive |
| GACGGGCTTGCACGAGAGGGCTTT  | 0  | 20 | RDR2-sensitive |
| GACGGGGACTGCAGGCGGATTCCGG | 0  | 12 | RDR2-sensitive |
| GACGGGGCATTGTAAGTGGCAGAG  | 75 | 8  | RDR2-resistant |
| GACGGGGGCTTTGGCAGAACTGCA  | 0  | 20 | RDR2-sensitive |
| GACGGGGTGGAGAACGACCACGGC  | 0  | 12 | RDR2-sensitive |
| GACGGGGTGGAGAACGACCCGCGC  | 1  | 27 | RDR2-sensitive |
| GACGGGTACGGGTAGATATCCATA  | 0  | 9  | RDR2-sensitive |
| GACGGGTAGTCTCTGACAGGTAGA  | 0  | 10 | RDR2-sensitive |
| GACGGGTCACCGGATCGCCTGGCA  | 0  | 11 | RDR2-sensitive |
| GACGGGTCGCTGATGAAGACAGGA  | 0  | 17 | RDR2-sensitive |
| GACGGGTCGGTCTGAAACACGGCT  | 1  | 30 | RDR2-sensitive |
| GACGGGTTTCGACGACTCGACGGTA | 0  | 48 | RDR2-sensitive |
| GACGGGTTTCGACGACTTGACGGTA | 2  | 28 | RDR2-sensitive |
| GACGGGTTTCGATGACTCGACGGCA | 2  | 18 | RDR2-sensitive |
| GACGGTAAACGACACGACGACGAG  | 0  | 10 | RDR2-sensitive |
| GACGGTAAACGACGCGACGACGAG  | 0  | 13 | RDR2-sensitive |
| GACGGTAAGCTTATGTCTGACGGT  | 0  | 16 | RDR2-sensitive |
| GACGGTAAGGTGGAACATCGGCGT  | 1  | 26 | RDR2-sensitive |
| GACGGTACAGAACCAGGGAGGCAG  | 0  | 12 | RDR2-sensitive |
| GACGGTACGGTCTGGGAGCGACGG  | 1  | 27 | RDR2-sensitive |
| GACGGTACTCTCTGCGGGAGCGTG  | 0  | 15 | RDR2-sensitive |
| GACGGTAGCGACTTGGGCGAGCAT  | 0  | 12 | RDR2-sensitive |
| GACGGTAGTGTAGACCAGGCACAA  | 0  | 21 | RDR2-sensitive |
| GACGGTATCTGACTTTGTGCCAGT  | 23 | 0  | RDR2-resistant |
| GACGGTATGGACCTAACTCAGGAG  | 0  | 26 | RDR2-sensitive |
| GACGGTCAATGTATCTCCGACGGC  | 0  | 10 | RDR2-sensitive |
| GACGGTCAGGTAGGTAGAGGACAT  | 0  | 18 | RDR2-sensitive |
| GACGGTCAGTCGGCGAGCTGGCAA  | 0  | 15 | RDR2-sensitive |
| GACGGTCCACGCCTGATGGTCGGA  | 0  | 14 | RDR2-sensitive |
| GACGGTCCCACAGTCATAGACAC   | 0  | 10 | RDR2-sensitive |
| GACGGTCCGCAACGGGAAACTGGA  | 0  | 14 | RDR2-sensitive |
| GACGGTCCGCGACCTGGCGCAGAG  | 0  | 9  | RDR2-sensitive |
| GACGGTCCGGACACGTAGCAGCAT  | 1  | 16 | RDR2-sensitive |
| GACGGTCCGTAGATACGCAGATGA  | 0  | 10 | RDR2-sensitive |
| GACGGTCCGTGGCCCTGAGCCGGA  | 0  | 11 | RDR2-sensitive |
| GACGGTCCGTGGCTCTGGACCGGA  | 0  | 17 | RDR2-sensitive |
| GACGGTCCGTGGCTCTGGGCCGGA  | 0  | 11 | RDR2-sensitive |
| GACGGTCCGCGACAGAACACGGTAC | 0  | 40 | RDR2-sensitive |
| GACGGTCCGCTAGGACAGTTCGGC  | 2  | 17 | RDR2-sensitive |
| GACGGTCCGTGCCCGTGCCACGGTG | 44 | 8  | RDR2-resistant |
| GACGGTCCGTTGGATGGGAGACGGA | 0  | 26 | RDR2-sensitive |
| GACGGTCTAGATTGGTGGAAAGGCA | 0  | 10 | RDR2-sensitive |
| GACGGTCTCCTGTAGTGTAGTGCC  | 0  | 12 | RDR2-sensitive |
| GACGGTCTGCTCGTGGAAAGTCGCA | 0  | 15 | RDR2-sensitive |
| GACGGTCTGTGCTGCATCAGTGA   | 0  | 9  | RDR2-sensitive |
| GACGGTCTGTGACCTGGCGCAGGA  | 0  | 19 | RDR2-sensitive |
| GACGGTCTGTGATCAGGAGTCGGA  | 0  | 20 | RDR2-sensitive |

|                            |     |     |                |
|----------------------------|-----|-----|----------------|
| GACGGTCTGTGCCGCTACGATGGA   | 1   | 12  | RDR2-sensitive |
| GACGGTCTGTGCTGCTACGGTGGGA  | 1   | 19  | RDR2-sensitive |
| GACGGTCTGTGGCACAGGGTTGGA   | 1   | 14  | RDR2-sensitive |
| GACGGTGAAGGACGCCTGGGCGGC   | 1   | 33  | RDR2-sensitive |
| GACGGTGACGGCTCGTGCTCCCAT   | 0   | 13  | RDR2-sensitive |
| GACGGTGAGGGTAGACAAGGCGCT   | 0   | 11  | RDR2-sensitive |
| GACGGTGCAGATTGGCTGAAGGCA   | 0   | 10  | RDR2-sensitive |
| GACGGTGCCGAGTGGAAGGGACGT   | 0   | 37  | RDR2-sensitive |
| GACGGTGCGGCATGACAAACTGAA   | 0   | 50  | RDR2-sensitive |
| GACGGTGCGGCATGGCAAACACTGAA | 0   | 13  | RDR2-sensitive |
| GACGGTGCTACGGGATTGACTGGC   | 1   | 27  | RDR2-sensitive |
| GACGGTGCTGAACGTCGACGTCGT   | 0   | 10  | RDR2-sensitive |
| GACGGTGGACCTGCAGGACGTGCT   | 0   | 10  | RDR2-sensitive |
| GACGGTGGGATGATAGCACGGATT   | 0   | 13  | RDR2-sensitive |
| GACGGTGTAGAGTAGAGATGCCTG   | 0   | 13  | RDR2-sensitive |
| GACGGTGTAGATTCACGGAAGCGT   | 0   | 17  | RDR2-sensitive |
| GACGGTGTAGATTTACCAAAGGCA   | 0   | 12  | RDR2-sensitive |
| GACGGTGTGGGACAAGGCAAGAAG   | 0   | 13  | RDR2-sensitive |
| GACGGTGTTTCGTAGGATCGTGCGT  | 1   | 25  | RDR2-sensitive |
| GACGGTACTGCTTGCACCATGGC    | 0   | 22  | RDR2-sensitive |
| GACGGTTCGGACATCCTTCGGTGT   | 0   | 52  | RDR2-sensitive |
| GACGGTTCGGCGTTGACGGAGAAT   | 0   | 9   | RDR2-sensitive |
| GACGGTTGAGATTGCAGAACGGTA   | 0   | 16  | RDR2-sensitive |
| GACGGTTGATCGATCAGACCTCAG   | 0   | 9   | RDR2-sensitive |
| GACGGTTGTAGATATGTTCCGACGG  | 0   | 12  | RDR2-sensitive |
| GACGGTTGTCAGACGGACCGGAAA   | 0   | 10  | RDR2-sensitive |
| GACGGTTTATTTAGAGATCGCTGG   | 0   | 9   | RDR2-sensitive |
| GACGGTTTCTGCAGACGGGTTGGA   | 0   | 24  | RDR2-sensitive |
| GACGGTTTGTGACCTGACAGCCGG   | 0   | 14  | RDR2-sensitive |
| GACGGTTTTGGCGTCGGACGTTGT   | 0   | 13  | RDR2-sensitive |
| GACGTAACCTCGGGAGTGGACGGGA  | 0   | 13  | RDR2-sensitive |
| GACGTACGGAACGACGACGAGCTC   | 0   | 9   | RDR2-sensitive |
| GACGTACGTAGAGAAGGAGCCGCT   | 0   | 29  | RDR2-sensitive |
| GACGTACTGTGACGGTGGGGATGA   | 0   | 34  | RDR2-sensitive |
| GACGTACTGTTTGACGTTCCGACGG  | 0   | 100 | RDR2-sensitive |
| GACGTACTTTAGAGTAGAGGCTGA   | 0   | 42  | RDR2-sensitive |
| GACGTAGACCAAGAGGGCTTCTCC   | 7   | 48  | RDR2-sensitive |
| GACGTAGACCGCGAACGGCGACAT   | 0   | 16  | RDR2-sensitive |
| GACGTAGACTGGATGAGCGGATGC   | 0   | 17  | RDR2-sensitive |
| GACGTAGAGCCGAAGAGAGGTGAA   | 0   | 12  | RDR2-sensitive |
| GACGTAGATCAAGAGGGCTTCTCC   | 1   | 18  | RDR2-sensitive |
| GACGTAGATCCGAGCGGAAAGGA    | 0   | 10  | RDR2-sensitive |
| GACGTAGCAGATCAGCGAGGACGA   | 0   | 9   | RDR2-sensitive |
| GACGTAGCAGATCGGCGAGGACGA   | 0   | 14  | RDR2-sensitive |
| GACGTCCCGGCGGATCGGCTCAAG   | 2   | 17  | RDR2-sensitive |
| GACGTCTTCGCACGGATCGACCGG   | 0   | 10  | RDR2-sensitive |
| GACGTGAAGGACGCCGACGACTGC   | 169 | 1   | RDR2-resistant |
| GACGTGAATCCTCCGGGGTCCGGCT  | 3   | 20  | RDR2-sensitive |
| GACGTGACACTAACGGCTCCCTGC   | 0   | 9   | RDR2-sensitive |

|                           |    |     |                |
|---------------------------|----|-----|----------------|
| GACGTGACGACGAACGACGGCGAA  | 0  | 10  | RDR2-sensitive |
| GACGTGACGGCACAACTCTTCAT   | 0  | 18  | RDR2-sensitive |
| GACGTGAGCGTGATGACTGGGCAG  | 1  | 16  | RDR2-sensitive |
| GACGTGAGCTGAAGCCGGGTGAGC  | 0  | 23  | RDR2-sensitive |
| GACGTGAGGAACAACCTGGATCGGC | 0  | 10  | RDR2-sensitive |
| GACGTGCCGACTGCAGAGACGGTG  | 0  | 11  | RDR2-sensitive |
| GACGTGCCGGGAGGGACGAAGACGG | 2  | 15  | RDR2-sensitive |
| GACGTGCTCGGGCAGAGAAAGCAG  | 0  | 9   | RDR2-sensitive |
| GACGTGGAACCGAGCTCGACGCCA  | 0  | 11  | RDR2-sensitive |
| GACGTGGAACCGAGCTCGGCGCCA  | 1  | 14  | RDR2-sensitive |
| GACGTGGACGCATCTGAAAGCAGA  | 0  | 9   | RDR2-sensitive |
| GACGTGGACGCATGTAGGAGCGGG  | 0  | 20  | RDR2-sensitive |
| GACGTGGACGCTTGTGGGAGCCGG  | 0  | 9   | RDR2-sensitive |
| GACGTGGACGGCACCGACGACAGC  | 0  | 10  | RDR2-sensitive |
| GACGTGGACTGGAGCTACGGTGAG  | 1  | 13  | RDR2-sensitive |
| GACGTGGACTGTCCGCGGCACTGG  | 0  | 9   | RDR2-sensitive |
| GACGTGGCTATAGCCTGAGGCTGT  | 1  | 12  | RDR2-sensitive |
| GACGTGGCTGGCGCACCGGACTGT  | 0  | 10  | RDR2-sensitive |
| GACGTGGGACGTAGGTGGACGCGC  | 0  | 10  | RDR2-sensitive |
| GACGTGGTACATGAAAGCTCGGTA  | 30 | 0   | RDR2-resistant |
| GACGTGGTTGGGCTGACGACGGAA  | 0  | 15  | RDR2-sensitive |
| GACGTGGTTTAGGGCTAGACTGGA  | 0  | 10  | RDR2-sensitive |
| GACGTGTCGGGCTCGTGCAGGGTT  | 0  | 18  | RDR2-sensitive |
| GACGTGTTGAGCTGTAGTGGTGA   | 0  | 10  | RDR2-sensitive |
| GACGTGTTTGACAACCTCGACGGCA | 0  | 23  | RDR2-sensitive |
| GACGTGTTTGACGACTCGACGGCA  | 8  | 119 | RDR2-sensitive |
| GACGTGTTTGACGACTCGACGGTA  | 2  | 41  | RDR2-sensitive |
| GACGTGTTTGATGACTCGACGGTA  | 0  | 20  | RDR2-sensitive |
| GACGTTACTGGAGAGCGTAGAGGA  | 0  | 11  | RDR2-sensitive |
| GACGTTCGAAGGAGGTAGAGGCAT  | 0  | 26  | RDR2-sensitive |
| GACGTTGACTCGGCTGAACTCGGC  | 0  | 10  | RDR2-sensitive |
| GACGTTGACTGTCCGGCAAAGCAC  | 0  | 10  | RDR2-sensitive |
| GACGTTGCTGCGGATCTGATCGGC  | 0  | 9   | RDR2-sensitive |
| GACGTTGCTGGACGCCATAGCGGA  | 0  | 9   | RDR2-sensitive |
| GACGTTGCTGGAGACACAGAAGAT  | 0  | 24  | RDR2-sensitive |
| GACGTTGCTGGAGAGCATAGAGGC  | 0  | 12  | RDR2-sensitive |
| GACGTTGCTGGAGAGCGTAGAGGA  | 0  | 27  | RDR2-sensitive |
| GACGTTGCTGGAGAGTGTAGAAGA  | 0  | 11  | RDR2-sensitive |
| GACGTTGCTGGAGGGAGTAGAGGA  | 5  | 97  | RDR2-sensitive |
| GACGTTGCTGGATGGAGTAGAGGA  | 0  | 11  | RDR2-sensitive |
| GACGTTGCTGTGGATCCGATCGGC  | 0  | 24  | RDR2-sensitive |
| GACGTTGGAGCTCTTGATGGGCAG  | 0  | 19  | RDR2-sensitive |
| GACGTTGTTCGAGTAGACGAGGGT  | 7  | 47  | RDR2-sensitive |
| GACGTTGTTGGAGGGGTAGAGGAC  | 0  | 32  | RDR2-sensitive |
| GACTAAAGCGGTCAGACGGTGGAG  | 2  | 52  | RDR2-sensitive |
| GACTAAGGGACATGTAGCGTCCGA  | 0  | 61  | RDR2-sensitive |
| GACTACACAGAACTTGGTGTCCGC  | 0  | 18  | RDR2-sensitive |
| GACTACAGAGTGGACAGTTGACGC  | 0  | 19  | RDR2-sensitive |
| GACTACGACGAGCAAGCCTGACGC  | 0  | 9   | RDR2-sensitive |

|                           |    |    |                |
|---------------------------|----|----|----------------|
| GACTACGCTCTGGGCTGGACGGTC  | 1  | 12 | RDR2-sensitive |
| GACTACGGACGTACTAGAAGACGA  | 0  | 29 | RDR2-sensitive |
| GACTACTATATCAAGGACTATGGC  | 1  | 13 | RDR2-sensitive |
| GACTACTGCGTCAAGGACTGCGGC  | 0  | 20 | RDR2-sensitive |
| GACTACTGTCGTCCGACGGCCAC   | 58 | 3  | RDR2-resistant |
| GACTACTTATCGTCTATTGTTGGA  | 0  | 11 | RDR2-sensitive |
| GACTAGACTGAGACGGAGGACGAG  | 0  | 27 | RDR2-sensitive |
| GACTAGATCTGAGGGACTGACGGG  | 0  | 20 | RDR2-sensitive |
| GACTAGATGTAGAGACGTTTTGCT  | 0  | 17 | RDR2-sensitive |
| GACTAGATTTAGGACGGTCCGCGA  | 0  | 10 | RDR2-sensitive |
| GACTAGCGGGCTTGACAGATCGGA  | 6  | 43 | RDR2-sensitive |
| GACTAGTCGACTGATCGGTGGCAA  | 0  | 42 | RDR2-sensitive |
| GACTAGTTGTTCTGAAAGACGCAT  | 0  | 20 | RDR2-sensitive |
| GACTATCGTGTAGGACAGCTCGGC  | 0  | 14 | RDR2-sensitive |
| GACTATGCGTCCGGCTGTATTGGTA | 21 | 1  | RDR2-resistant |
| GACTATGCGTCCGGTTGTATTGGTA | 54 | 0  | RDR2-resistant |
| GACTATTAGCACCCAGGATCGTCGC | 0  | 9  | RDR2-sensitive |
| GACTATTTTCGTCCGCCGGCCAC   | 0  | 21 | RDR2-sensitive |
| GACTCAAAAGTAGGACTAAGTCGG  | 0  | 18 | RDR2-sensitive |
| GACTCAACGTTTAGACTCGCTCGG  | 1  | 13 | RDR2-sensitive |
| GACTCACAAGATCGTTCGGTGCC   | 0  | 21 | RDR2-sensitive |
| GACTCACTAGGACTCGAGCGGTAG  | 0  | 11 | RDR2-sensitive |
| GACTCAGAGGTGTAGAGAAGGCAT  | 0  | 15 | RDR2-sensitive |
| GACTCAGAGGTGTAGAGACGACAT  | 2  | 16 | RDR2-sensitive |
| GACTCAGTGACGTAGTGACGTGTG  | 1  | 12 | RDR2-sensitive |
| GACTCATCGGGCTCCCGACACGGC  | 0  | 16 | RDR2-sensitive |
| GACTCCACGGATGGCGAACGGCGT  | 0  | 9  | RDR2-sensitive |
| GACTCCACGTCGTCTGGGGACGCC  | 0  | 10 | RDR2-sensitive |
| GACTCCCTGTTTGACGTGTCGGAT  | 0  | 13 | RDR2-sensitive |
| GACTCCGATGGGAACCGACGGACA  | 0  | 11 | RDR2-sensitive |
| GACTCCTCCAACCGGTCGTTCGAC  | 0  | 11 | RDR2-sensitive |
| GACTCCTCTGCGTACGTTCCGGACA | 0  | 21 | RDR2-sensitive |
| GACTCGACGAGACGGTAACATCAC  | 0  | 10 | RDR2-sensitive |
| GACTCGACGGCAAACGATGAGGTC  | 0  | 12 | RDR2-sensitive |
| GACTCGACTGTCCGGACACGGTGC  | 5  | 57 | RDR2-sensitive |
| GACTCGCCAGAACGACGCGCCGAT  | 1  | 14 | RDR2-sensitive |
| GACTCGCGTAGGACAGTTCGGCTA  | 0  | 15 | RDR2-sensitive |
| GACTCGCTCTAGGGGTCGTCCGGAT | 1  | 15 | RDR2-sensitive |
| GACTCGGACCACGACCTAGATGGC  | 0  | 15 | RDR2-sensitive |
| GACTCGGACCGGCTTGATGTTCCAG | 0  | 16 | RDR2-sensitive |
| GACTCGGACGGTCCACGATGGCAT  | 1  | 17 | RDR2-sensitive |
| GACTCGGACTAAACTTTAGCAGGA  | 0  | 17 | RDR2-sensitive |
| GACTCGGATTAGCTAGCAGGTCGT  | 0  | 11 | RDR2-sensitive |
| GACTCGGCTACGACGGTGACTCGG  | 0  | 11 | RDR2-sensitive |
| GACTCGGCTCGTTAGTAGCTCGGC  | 0  | 9  | RDR2-sensitive |
| GACTCGGGCGATTGATTCCGGCTA  | 0  | 9  | RDR2-sensitive |
| GACTCGGTGATTGCGAGACTCGGC  | 0  | 15 | RDR2-sensitive |
| GACTCGGTGGACTGGACTGATGGG  | 0  | 9  | RDR2-sensitive |
| GACTCGTAGATGCAAGGACTGGAT  | 0  | 13 | RDR2-sensitive |

|                           |    |    |                |
|---------------------------|----|----|----------------|
| GACTCTAGAGCGTATTGGACGGTT  | 0  | 13 | RDR2-sensitive |
| GACTCTCCAAGACGGACAGAACAT  | 1  | 63 | RDR2-sensitive |
| GACTCTCGGCAACGGATATCTCGG  | 62 | 11 | RDR2-resistant |
| GACTCTCGGGCTCTCGGCAACAAG  | 0  | 13 | RDR2-sensitive |
| GACTCTCTGGTAGACCTAGGCATT  | 0  | 12 | RDR2-sensitive |
| GACTCTCTGTTTGACGTGTCCGAT  | 0  | 11 | RDR2-sensitive |
| GACTCTGGACTGTTTCAGGCGCTAC | 0  | 14 | RDR2-sensitive |
| GACTCTGTAGCAAAGCACGGACAT  | 0  | 40 | RDR2-sensitive |
| GACTCTGTAGCAACGCACGAGCAT  | 0  | 12 | RDR2-sensitive |
| GACTCTGTAGCAACGCACGGGCAT  | 0  | 33 | RDR2-sensitive |
| GACTCTGTAGCAACGCACGGGTAT  | 0  | 37 | RDR2-sensitive |
| GACTCTGTAGCAACGTACGGGCAT  | 0  | 46 | RDR2-sensitive |
| GACTCTGTCAGGAACGGAAGTGGG  | 0  | 20 | RDR2-sensitive |
| GACTCTGTGGAACCGACGTAGCAC  | 0  | 14 | RDR2-sensitive |
| GACTCTGTTGAATTCGGTGTGTCA  | 0  | 9  | RDR2-sensitive |
| GACTCTTGGATGAGGCACTGATGG  | 18 | 1  | RDR2-resistant |
| GACTCTTGGCATCGACGGCCTTTA  | 0  | 16 | RDR2-sensitive |
| GACTCTTGGCGTACTCGGCGACC   | 8  | 56 | RDR2-sensitive |
| GACTCTTGGTATCGACGGCCTTTA  | 0  | 71 | RDR2-sensitive |
| GACTGAAAAGCTGAGCGTTTGGCA  | 2  | 14 | RDR2-sensitive |
| GACTGAAACGTAGGATCGGACGGC  | 0  | 12 | RDR2-sensitive |
| GACTGAACCAGCACAGACGGACAC  | 0  | 36 | RDR2-sensitive |
| GACTGAAGGGGAGTAGACGTGGCA  | 0  | 25 | RDR2-sensitive |
| GACTGACAACAGGAGCGAGAGCAG  | 0  | 11 | RDR2-sensitive |
| GACTGACACGTAGGAGGCGCTGTA  | 0  | 14 | RDR2-sensitive |
| GACTGACGAAGAGCGTTGATGCCA  | 0  | 12 | RDR2-sensitive |
| GACTGACGCGACCTGACATGGCAT  | 1  | 21 | RDR2-sensitive |
| GACTGACGGTGTAGATTTACCAA   | 0  | 10 | RDR2-sensitive |
| GACTGACTAGCGGAGCAACGACAT  | 0  | 11 | RDR2-sensitive |
| GACTGACTGAGGACGAGGCACTAG  | 0  | 10 | RDR2-sensitive |
| GACTGACTGGCAGAGGAACAACAT  | 0  | 17 | RDR2-sensitive |
| GACTGACTGTATGGCGGGGGGCGC  | 0  | 13 | RDR2-sensitive |
| GACTGACTGTGGCGTGGCTAGCCA  | 0  | 27 | RDR2-sensitive |
| GACTGAGAACGGAGCTGAGGATGG  | 0  | 9  | RDR2-sensitive |
| GACTGAGATCGCAGAATGGCAGAA  | 0  | 21 | RDR2-sensitive |
| GACTGAGATTGCAGAACGGTAGGA  | 0  | 14 | RDR2-sensitive |
| GACTGAGCCAGACGGATGGTAGAA  | 0  | 80 | RDR2-sensitive |
| GACTGAGCCGGCCTAGACAGACAT  | 0  | 13 | RDR2-sensitive |
| GACTGAGCGGACGGTCTAGACTAT  | 0  | 16 | RDR2-sensitive |
| GACTGAGGCACGTAGAACTGGCGT  | 0  | 12 | RDR2-sensitive |
| GACTGAGGGACAGATACCGTCGGA  | 0  | 11 | RDR2-sensitive |
| GACTGAGTCAGACAAGTGGTAGAC  | 0  | 13 | RDR2-sensitive |
| GACTGATATCCGTCCGATTTCCGA  | 0  | 19 | RDR2-sensitive |
| GACTGATCAAGTAGAGTCATGGCC  | 19 | 1  | RDR2-resistant |
| GACTGATTCGGAACGGAGGCGGCT  | 0  | 9  | RDR2-sensitive |
| GACTGATTCGGACGAAGGAGGGTT  | 2  | 18 | RDR2-sensitive |
| GACTGATTGATAGGCTCTCGGCAA  | 0  | 9  | RDR2-sensitive |
| GACTGATTGGGACGGAGGAGGCTT  | 0  | 16 | RDR2-sensitive |
| GACTGCAACGGCAAACCTACGTA   | 0  | 11 | RDR2-sensitive |

|                           |    |    |                |
|---------------------------|----|----|----------------|
| GACTGCAAGGACTGCGGCAGACAG  | 4  | 23 | RDR2-sensitive |
| GACTGCACGGAGCCAACAAAACGG  | 0  | 11 | RDR2-sensitive |
| GACTGCAGAGGATTGTGGTATAGA  | 0  | 11 | RDR2-sensitive |
| GACTGCCACGTCAGGGAGCTCGGC  | 2  | 19 | RDR2-sensitive |
| GACTGCCCATCTAGAGCTTGACGG  | 0  | 15 | RDR2-sensitive |
| GACTGCCGGACCGGAGAACGACGG  | 0  | 17 | RDR2-sensitive |
| GACTGCGGAGAGAAAAGAGGACGT  | 15 | 0  | RDR2-resistant |
| GACTGCGGCGAAGACTTCGAGCGG  | 0  | 17 | RDR2-sensitive |
| GACTGCGGCGGCGTTGTGGACGGC  | 0  | 25 | RDR2-sensitive |
| GACTGCGGCTGCGGCTTCTACAGT  | 7  | 84 | RDR2-sensitive |
| GACTGCGGGCAGTAGCGGCCTTTA  | 0  | 11 | RDR2-sensitive |
| GACTGCGGGCTACAGAAGACTGAA  | 0  | 12 | RDR2-sensitive |
| GACTGCTAGGAGCCTAGGACGACG  | 0  | 10 | RDR2-sensitive |
| GACTGGAACAGGAACGAAGACGTT  | 0  | 35 | RDR2-sensitive |
| GACTGGAAGTAGGGACGTTCTGCC  | 1  | 42 | RDR2-sensitive |
| GACTGGACAGGAGAGAGAGAGCAG  | 0  | 10 | RDR2-sensitive |
| GACTGGACCAGGCAACCAAACATA  | 0  | 14 | RDR2-sensitive |
| GACTGGACCGAGAACTTGCCGGAG  | 0  | 11 | RDR2-sensitive |
| GACTGGACGGAACCCGGCATGCCA  | 0  | 17 | RDR2-sensitive |
| GACTGGACGGTCCGTGACCTCGGC  | 0  | 16 | RDR2-sensitive |
| GACTGGACGGTGATGCAAGCTCGT  | 0  | 10 | RDR2-sensitive |
| GACTGGACGGTGGACGCACCCGAC  | 0  | 11 | RDR2-sensitive |
| GACTGGACGTACCTGGAAGGCGCG  | 0  | 13 | RDR2-sensitive |
| GACTGGACGTAGGGACATTCGGCT  | 0  | 20 | RDR2-sensitive |
| GACTGGACTGTTCCGGGAGTCGGAA | 0  | 29 | RDR2-sensitive |
| GACTGGATCGGCGAGATGGCGAAC  | 0  | 10 | RDR2-sensitive |
| GACTGGATGTAGGGACGTTCTCGC  | 0  | 17 | RDR2-sensitive |
| GACTGGATTGTTTCGGAGGGTCCGG | 0  | 24 | RDR2-sensitive |
| GACTGGCATGTAGATGTGGCCAG   | 0  | 9  | RDR2-sensitive |
| GACTGGCCCACTGTACGCGAGCAT  | 0  | 26 | RDR2-sensitive |
| GACTGGCCTGTCTGACTGAGGCAT  | 1  | 35 | RDR2-sensitive |
| GACTGGCGCATCTGATGGCTCTAC  | 0  | 15 | RDR2-sensitive |
| GACTGGCTACTGTAGTTCACGGGC  | 1  | 53 | RDR2-sensitive |
| GACTGGCTCATGCGGCACTGACTT  | 0  | 26 | RDR2-sensitive |
| GACTGGCTGATGGAGCAAGGCAAC  | 15 | 0  | RDR2-resistant |
| GACTGGGACGAGTAGGAGTACGAC  | 0  | 13 | RDR2-sensitive |
| GACTGGGACGGTGTAACTCCAA    | 0  | 32 | RDR2-sensitive |
| GACTGGGAGTAGAGCAGGGCACAG  | 0  | 11 | RDR2-sensitive |
| GACTGGGCCAGTTGACTCGGTGT   | 0  | 16 | RDR2-sensitive |
| GACTGGTACGGGCTCGCTCGGCAA  | 0  | 15 | RDR2-sensitive |
| GACTGGTAGATGCAAGGACTGGAT  | 0  | 9  | RDR2-sensitive |
| GACTGTACTGTGGAAGGAGCCCGC  | 0  | 17 | RDR2-sensitive |
| GACTGTCAGGTCCCCTACGGCTCC  | 0  | 22 | RDR2-sensitive |
| GACTGTCCATGTCTGGAGCTCGGA  | 0  | 11 | RDR2-sensitive |
| GACTGTCGGAGATGCGAGCAGCAG  | 0  | 25 | RDR2-sensitive |
| GACTGTCGTCGCTGTTGCGTGCCT  | 1  | 14 | RDR2-sensitive |
| GACTGTCTACTGTACGTAAGGCA   | 1  | 15 | RDR2-sensitive |
| GACTGTCTCCAGTAGAGCGCGTAA  | 0  | 9  | RDR2-sensitive |
| GACTGTCTGACGTAGAGATGGCAA  | 0  | 16 | RDR2-sensitive |

|                           |     |    |                |
|---------------------------|-----|----|----------------|
| GACTGTGAACGACGCAACGACGAA  | 0   | 9  | RDR2-sensitive |
| GACTGTGCTGTCGGGAAGATCTAG  | 0   | 12 | RDR2-sensitive |
| GACTGTGGCAGACTGGCTTGGGTA  | 0   | 10 | RDR2-sensitive |
| GACTGTGGGGGATGTCGGCTCGAC  | 0   | 29 | RDR2-sensitive |
| GACTGTGTCTGTGCGACTGTGCGG  | 1   | 12 | RDR2-sensitive |
| GACTGTTCGACGGAGAGAGCCGGA  | 0   | 17 | RDR2-sensitive |
| GACTGTTCGGAGAAGGAGGCGCTC  | 0   | 18 | RDR2-sensitive |
| GACTGTTGGATGGAGATACGACGG  | 0   | 24 | RDR2-sensitive |
| GACTGTTGGATTTTCATCTGACGGC | 0   | 12 | RDR2-sensitive |
| GACTGTTGTTGCGGACGCGAGCAT  | 1   | 45 | RDR2-sensitive |
| GACTGTTTGGACTGCTGCGGCTGT  | 0   | 14 | RDR2-sensitive |
| GACTTACTGATTGTTGGCGCGCGC  | 3   | 29 | RDR2-sensitive |
| GACTTATCCTTTGCGGTCGGCGGA  | 0   | 15 | RDR2-sensitive |
| GACTTATGGTCGGTCGCTATAGAG  | 0   | 12 | RDR2-sensitive |
| GACTTCGTACGGCTACATCGAACA  | 3   | 22 | RDR2-sensitive |
| GACTTCGTAGCAACGCACGAGCAT  | 0   | 13 | RDR2-sensitive |
| GACTTCTTAGGACGGCAGTAGAGA  | 0   | 11 | RDR2-sensitive |
| GACTTGAGCGACTGAGGGAGACCG  | 0   | 10 | RDR2-sensitive |
| GACTTGATCAGAGTGGACTGGGCA  | 0   | 20 | RDR2-sensitive |
| GACTTGATCTAGGTGGCGTCTCCC  | 1   | 17 | RDR2-sensitive |
| GACTTGATTTCGGACCGGGCCGGGC | 0   | 16 | RDR2-sensitive |
| GACTTGATTTGATCGATTGTTGGG  | 0   | 14 | RDR2-sensitive |
| GACTTGATTTGTTTCGATTGTTGGG | 4   | 17 | RDR2-sensitive |
| GACTTGGACGGAACACCGGGTGGC  | 0   | 9  | RDR2-sensitive |
| GACTTGGACGTAGGAGTGGCTCCT  | 0   | 12 | RDR2-sensitive |
| GACTTGGACTGGGAGGAGGAGGAT  | 0   | 13 | RDR2-sensitive |
| GACTTGGTACTGTACTGTGGTGTG  | 0   | 9  | RDR2-sensitive |
| GACTTGTCCCATGCGGTCGACGGA  | 0   | 61 | RDR2-sensitive |
| GACTTTAAATTGAACAAACGGCAT  | 21  | 0  | RDR2-resistant |
| GACTTTCTGCAGGACCTTCGGCGA  | 0   | 14 | RDR2-sensitive |
| GACTTTGTAGGTAGCCGTCGGAGA  | 0   | 10 | RDR2-sensitive |
| GACTTTTCATTTCGTCTGGCCAAGG | 108 | 0  | RDR2-resistant |
| GACTTTTCTGGCAAGTCGGGCGAC  | 0   | 17 | RDR2-sensitive |
| GACTTTTGGTGATAAATCGACGGG  | 14  | 0  | RDR2-resistant |
| GAGAAACTCCGGTCTGTGACGCAT  | 0   | 19 | RDR2-sensitive |
| GAGAAACTCGGGCCTGTGACGCAC  | 1   | 15 | RDR2-sensitive |
| GAGAAACTCGGGCCTGTGACGCAT  | 1   | 30 | RDR2-sensitive |
| GAGAACAGCGGACTGTGTTGTGGC  | 0   | 13 | RDR2-sensitive |
| GAGAACCCTTTAGAGGACGCTGCT  | 1   | 15 | RDR2-sensitive |
| GAGAACGCTATGTCCCTCGTCGGG  | 0   | 13 | RDR2-sensitive |
| GAGAACGCTGACGTGGCACGTGAG  | 4   | 48 | RDR2-sensitive |
| GAGAACGTTGCTGTAGCGAGTAGA  | 0   | 9  | RDR2-sensitive |
| GAGAACTGTAGTAGTGACCCGGTG  | 0   | 11 | RDR2-sensitive |
| GAGAACTGTGGACGGGTGCAGCAA  | 1   | 25 | RDR2-sensitive |
| GAGAAGACGGAACGTTCAGGCGC   | 0   | 9  | RDR2-sensitive |
| GAGAAGACTGTAAAGGACGGATAT  | 0   | 85 | RDR2-sensitive |
| GAGAAGCACTGTGGCTCAGATGGA  | 0   | 14 | RDR2-sensitive |
| GAGAAGCCCCTGAGCAGCAGTCGG  | 1   | 14 | RDR2-sensitive |
| GAGAAGCGGCGCGTTTGGCTCCAG  | 1   | 15 | RDR2-sensitive |



|                           |    |     |                |
|---------------------------|----|-----|----------------|
| GAGAAGGCTGTGTGAAAGACGGTT  | 0  | 15  | RDR2-sensitive |
| GAGAATGGACTGTGCACGGTGAGG  | 0  | 12  | RDR2-sensitive |
| GAGAATGGTGGACTCGAACCGGAA  | 0  | 11  | RDR2-sensitive |
| GAGAATTAGGCGTCTTGAGGGTAC  | 0  | 11  | RDR2-sensitive |
| GAGACAACTGTAGACGGCCCCCGC  | 1  | 37  | RDR2-sensitive |
| GAGACAAGGACAGGTGCATGTGGG  | 1  | 14  | RDR2-sensitive |
| GAGACACGCCGGACTGTGTAGGCT  | 0  | 14  | RDR2-sensitive |
| GAGACACGGGCTGTATGAGCGGAT  | 0  | 16  | RDR2-sensitive |
| GAGACACTCGGCATAGACATACAC  | 1  | 12  | RDR2-sensitive |
| GAGACAGACGGTAGGCCAGAAAGT  | 0  | 11  | RDR2-sensitive |
| GAGACAGAGTTAGACGTGTGGTAG  | 1  | 214 | RDR2-sensitive |
| GAGACAGCGGAACGCAGGAGAACC  | 0  | 10  | RDR2-sensitive |
| GAGACAGGCTAGCACGGAACTTAA  | 0  | 27  | RDR2-sensitive |
| GAGACAGTGTAAAGACGGAGACAGA | 0  | 10  | RDR2-sensitive |
| GAGACAGTGTAGGACAGAGACTGA  | 0  | 37  | RDR2-sensitive |
| GAGACATGTCGTGCTCGTGACGGA  | 0  | 13  | RDR2-sensitive |
| GAGACATGTTGGACTAGCGTGCGT  | 1  | 132 | RDR2-sensitive |
| GAGACCCCTCAGGGGCAAAGTCGG  | 0  | 41  | RDR2-sensitive |
| GAGACCGTAGAACGGTAGAACGGT  | 0  | 18  | RDR2-sensitive |
| GAGACCGTAGGAAGTTAGTGGCTC  | 1  | 12  | RDR2-sensitive |
| GAGACCGTGATAGCACCGAGCGCC  | 0  | 10  | RDR2-sensitive |
| GAGACCTCTCAGGACAAAGTTCGGT | 0  | 9   | RDR2-sensitive |
| GAGACGACCCTGGACCTGGAGTGG  | 0  | 11  | RDR2-sensitive |
| GAGACGACGGCCTAGACCACTCAC  | 1  | 13  | RDR2-sensitive |
| GAGACGATTGGACTCAGGACGGAC  | 0  | 32  | RDR2-sensitive |
| GAGACGCAAGCTGTATGAGCGGAT  | 0  | 22  | RDR2-sensitive |
| GAGACGCAGGCTGTATGAGCGGAT  | 1  | 56  | RDR2-sensitive |
| GAGACGCCCGGCTGTAGGGATGGT  | 3  | 16  | RDR2-sensitive |
| GAGACGGAAATCCTCCGGGGTTCGG | 3  | 35  | RDR2-sensitive |
| GAGACGGAAACAAGGGAGAACAA   | 0  | 10  | RDR2-sensitive |
| GAGACGGAAAGTCCCTCGAGGTCGG | 0  | 14  | RDR2-sensitive |
| GAGACGGAGTTAGACGGGTGACAG  | 0  | 67  | RDR2-sensitive |
| GAGACGGCCGTAGGAAGTTAGCAT  | 0  | 12  | RDR2-sensitive |
| GAGACGGGCATGCACCACGCTGAT  | 0  | 15  | RDR2-sensitive |
| GAGACGGGGAGGAGGAACAGAAGA  | 28 | 1   | RDR2-resistant |
| GAGACGGTGAGAACACGAGGGCAA  | 1  | 18  | RDR2-sensitive |
| GAGACGGTGTAAAGACGGAGACTGA | 0  | 16  | RDR2-sensitive |
| GAGACGGTTCATAGGTGCCCTGTT  | 27 | 1   | RDR2-resistant |
| GAGACGTAGACTGGATGAGCGGAT  | 2  | 183 | RDR2-sensitive |
| GAGACTAGGACGGTATCTGATCGT  | 0  | 12  | RDR2-sensitive |
| GAGACTATAGCCTGCTGCAGTTGG  | 1  | 17  | RDR2-sensitive |
| GAGACTCAGGATCATCGGGTTCAT  | 34 | 7   | RDR2-resistant |
| GAGACTCGACTTTGCGCCGGTGA   | 23 | 2   | RDR2-resistant |
| GAGACTCGAGAGTGGGCAGAACGG  | 0  | 9   | RDR2-sensitive |
| GAGACTCGGCATCATATAGGGCGT  | 0  | 11  | RDR2-sensitive |
| GAGACTCTAGAGCGTATTGGACGG  | 1  | 55  | RDR2-sensitive |
| GAGACTCTAGAGCGTGTGGACGG   | 0  | 15  | RDR2-sensitive |
| GAGACTGACAGCAGGGGACTTCGC  | 0  | 13  | RDR2-sensitive |
| GAGACTGAGACCCACTTGTCGGCT  | 0  | 27  | RDR2-sensitive |

|                           |     |    |                |
|---------------------------|-----|----|----------------|
| GAGACTGAGCCAGACGGATGGTAG  | 0   | 44 | RDR2-sensitive |
| GAGACTGAGTCAGACGAGTGGTAG  | 0   | 22 | RDR2-sensitive |
| GAGACTGAGTCAGACGGGTGGTAG  | 0   | 9  | RDR2-sensitive |
| GAGACTGATCTGCATGCACGTACC  | 0   | 15 | RDR2-sensitive |
| GAGACTGCCTGACACTGAAGCGGT  | 0   | 18 | RDR2-sensitive |
| GAGACTGCTGGAGAGCGAAACGGT  | 0   | 13 | RDR2-sensitive |
| GAGACTGGACCGGCCGACACGAA   | 0   | 10 | RDR2-sensitive |
| GAGACTGGAGGCAGAACACGACGC  | 0   | 19 | RDR2-sensitive |
| GAGACTGGAGTAGAGGCCGAAGGT  | 6   | 65 | RDR2-sensitive |
| GAGACTGGCCAGCACCTGCACGGC  | 0   | 14 | RDR2-sensitive |
| GAGACTGGTCTGATGGCGTCGCTC  | 0   | 17 | RDR2-sensitive |
| GAGACTGGTTCTGTGCAGCGGTGT  | 0   | 10 | RDR2-sensitive |
| GAGACTGTATCTAGCATAGGGTGG  | 0   | 45 | RDR2-sensitive |
| GAGACTGTCTTCAACGGATGACGC  | 0   | 34 | RDR2-sensitive |
| GAGACTGTGACTATGGGACGACAT  | 0   | 12 | RDR2-sensitive |
| GAGACTGTGAGAGCGTTACCGGAA  | 0   | 15 | RDR2-sensitive |
| GAGACTGTGGATGCGGTACGCTAA  | 0   | 9  | RDR2-sensitive |
| GAGACTGTTTGGAGCAAGGAGGAG  | 11  | 48 | RDR2-sensitive |
| GAGAGAAGGGGACCGACACGTAGG  | 2   | 15 | RDR2-sensitive |
| GAGAGAATCTGGCTGTGAGGAGAA  | 0   | 11 | RDR2-sensitive |
| GAGAGACTGTTGGGAGCAAGGAGG  | 250 | 0  | RDR2-resistant |
| GAGAGAGAAGGGGACCGACACGTA  | 2   | 14 | RDR2-sensitive |
| GAGAGAGACTATAGAGTTGGGCGG  | 1   | 15 | RDR2-sensitive |
| GAGAGAGGGCGACGGCACTCACGC  | 0   | 15 | RDR2-sensitive |
| GAGAGATCACACTGCAAGGGCATA  | 0   | 16 | RDR2-sensitive |
| GAGAGATGGAACGGAACATGGCGT  | 1   | 23 | RDR2-sensitive |
| GAGAGCAGACAAGTCGGACCTCAA  | 0   | 26 | RDR2-sensitive |
| GAGAGCAGGGCTGGAGGTGGGCGA  | 0   | 11 | RDR2-sensitive |
| GAGAGCCAGGCTGTACGCGTGCAA  | 0   | 19 | RDR2-sensitive |
| GAGAGCCAGGCTGTGCGCGTGCAA  | 0   | 15 | RDR2-sensitive |
| GAGAGCCATCGGACTGTTCCGGTGA | 0   | 10 | RDR2-sensitive |
| GAGAGCCCCTGTTGGCCGTCGGAC  | 4   | 20 | RDR2-sensitive |
| GAGAGCCGGAGTACGTAACCTGCAT | 0   | 13 | RDR2-sensitive |
| GAGAGCGAGAGCCTTATGCGTCGG  | 0   | 11 | RDR2-sensitive |
| GAGAGCGGAAGTAGAAGCAGCGGA  | 9   | 38 | RDR2-sensitive |
| GAGAGCGGGATTGGAACGGAGCGG  | 0   | 34 | RDR2-sensitive |
| GAGAGCGGGCTGGACAGCGGCTGG  | 190 | 34 | RDR2-resistant |
| GAGAGCTCTAGTAGACACTCGGCA  | 0   | 10 | RDR2-sensitive |
| GAGAGCTCTCGGCACAGGGACTGG  | 1   | 32 | RDR2-sensitive |
| GAGAGCTCTCGTAGACACTCGGCA  | 0   | 9  | RDR2-sensitive |
| GAGAGCTCTCTGTGCGTCACGGAC  | 0   | 12 | RDR2-sensitive |
| GAGAGCTGACGTGACAGGGACGAG  | 0   | 9  | RDR2-sensitive |
| GAGAGCTGACGTGGCAGGGGCGAG  | 1   | 12 | RDR2-sensitive |
| GAGAGCTGAGGATGTGAGGACGGA  | 0   | 11 | RDR2-sensitive |
| GAGAGGACCGGCTCTAGTCGGAT   | 80  | 0  | RDR2-resistant |
| GAGAGGAGGAGGAGCACGCTGGGA  | 0   | 9  | RDR2-sensitive |
| GAGAGGAGGATGGGTGATGTGGAC  | 31  | 0  | RDR2-resistant |
| GAGAGGATCGTGCAACAGGAGGCA  | 27  | 0  | RDR2-resistant |
| GAGAGGCAGAACGATGCCACATGT  | 0   | 15 | RDR2-sensitive |

|                           |     |     |                |
|---------------------------|-----|-----|----------------|
| GAGAGGCTCTGCACGGACGGGAAA  | 0   | 12  | RDR2-sensitive |
| GAGAGGGAGTCGGTAGAGCGCGGC  | 1   | 24  | RDR2-sensitive |
| GAGAGGGGCATCCAGTGATCTGAA  | 0   | 19  | RDR2-sensitive |
| GAGAGGTAGGGCTGGTTGGCGAGC  | 0   | 17  | RDR2-sensitive |
| GAGAGGTCATGTGGTTTTCGGCGA  | 0   | 15  | RDR2-sensitive |
| GAGAGTAGTGGAAGGCGGGCTGGG  | 59  | 2   | RDR2-resistant |
| GAGAGTCACGTAGAAGCGAGGTAA  | 0   | 13  | RDR2-sensitive |
| GAGAGTCACGTAGGAGCGAGGTAA  | 0   | 20  | RDR2-sensitive |
| GAGAGTCACGTAGGGACGAAGTAA  | 0   | 9   | RDR2-sensitive |
| GAGAGTCCTTGGTGGCCGTCGGAC  | 1   | 13  | RDR2-sensitive |
| GAGAGTCGTGTAGAAACGGGCTAT  | 0   | 11  | RDR2-sensitive |
| GAGAGTCTGACTGTGCACGTGCAA  | 0   | 23  | RDR2-sensitive |
| GAGAGTCTGGCTGTCCGCGTGCAA  | 0   | 11  | RDR2-sensitive |
| GAGAGTGAACAGTAGCGACGACAA  | 0   | 20  | RDR2-sensitive |
| GAGAGTGACGTAGGAGCGCGGTAA  | 0   | 21  | RDR2-sensitive |
| GAGAGTGGAGGCGAGAGCTGACGT  | 0   | 18  | RDR2-sensitive |
| GAGAGTGGGAGGCAGAACCCTGCA  | 1   | 32  | RDR2-sensitive |
| GAGATAAGGCTTGACCGTCGGAAA  | 0   | 9   | RDR2-sensitive |
| GAGATCAGGCCTTGTTGGACGGGT  | 0   | 9   | RDR2-sensitive |
| GAGATCGAACATGTAGCCAGGCAC  | 1   | 17  | RDR2-sensitive |
| GAGATCGATTGTAGATCGATGGTT  | 0   | 10  | RDR2-sensitive |
| GAGATCGCAGAACGGCAGAACGGC  | 1   | 106 | RDR2-sensitive |
| GAGATCGCAGAACGGCAGAACGGT  | 0   | 24  | RDR2-sensitive |
| GAGATCGGGCTGTCGCGGACGCGG  | 0   | 9   | RDR2-sensitive |
| GAGATCGGGCTTGCAGGACGGGTC  | 0   | 9   | RDR2-sensitive |
| GAGATCGTAGAATGGTAGAACGGC  | 0   | 12  | RDR2-sensitive |
| GAGATCGTGTCTGTCTCGGACCAGA | 0   | 12  | RDR2-sensitive |
| GAGATCTCGTGAAGGGCAGGACAG  | 0   | 12  | RDR2-sensitive |
| GAGATCTGGAACAGGCTCGACGAG  | 0   | 16  | RDR2-sensitive |
| GAGATGACGCGCTGCAGTTCACGA  | 0   | 9   | RDR2-sensitive |
| GAGATGAGACTGGTGTTAGGGCAT  | 0   | 9   | RDR2-sensitive |
| GAGATGAGTATGTGGGCTGACGGT  | 0   | 21  | RDR2-sensitive |
| GAGATGCAGAGCTGCTTGTCTGGAA | 0   | 20  | RDR2-sensitive |
| GAGATGGCGAGAATGACAGATGAC  | 23  | 1   | RDR2-resistant |
| GAGATGTAGACTGAATAAGCGGAT  | 0   | 9   | RDR2-sensitive |
| GAGATTAAGTCAGACGGATGGTAG  | 0   | 18  | RDR2-sensitive |
| GAGATTACCCTCGGGCGACGGAAC  | 0   | 45  | RDR2-sensitive |
| GAGATTCCAGTAGACGGTTCCTGA  | 0   | 9   | RDR2-sensitive |
| GAGATTGAGGGACGGCAGAACGGC  | 0   | 18  | RDR2-sensitive |
| GAGATTGATTGTAGCTATTGGCTC  | 131 | 12  | RDR2-resistant |
| GAGATTGCAGAACGGTAGGCTACC  | 1   | 31  | RDR2-sensitive |
| GAGATTGCAGGATGGCAGAACGAC  | 0   | 13  | RDR2-sensitive |
| GAGATTGCAGGATGGCAGAACGGC  | 0   | 16  | RDR2-sensitive |
| GAGATTGCCAGGACGGGACGGGAT  | 0   | 10  | RDR2-sensitive |
| GAGATTGTAAACATACAGGTGCTA  | 101 | 2   | RDR2-resistant |
| GAGATTGTACAACGGTAGAATGGA  | 0   | 14  | RDR2-sensitive |
| GAGATTGTAGAACGGTAGAATGGA  | 2   | 39  | RDR2-sensitive |
| GAGATTGTATGATTGAGGCTAGTC  | 14  | 0   | RDR2-resistant |
| GAGATTGTCTAACGGCAGAACGGT  | 0   | 11  | RDR2-sensitive |

|                           |     |    |                |
|---------------------------|-----|----|----------------|
| GAGATTGTGTCTGGAGCGAGCTGG  | 1   | 12 | RDR2-sensitive |
| GAGATTTTATATTTTTTCGTCCGG  | 149 | 6  | RDR2-resistant |
| GAGCAAAGACAGGGCGTGGACTGC  | 1   | 14 | RDR2-sensitive |
| GAGCAAAGCTGGCAGAACGTTGGG  | 1   | 16 | RDR2-sensitive |
| GAGCAAAGTAGGCAGGACACTGGA  | 0   | 11 | RDR2-sensitive |
| GAGCAAATTGTTTCGCATCTCTGGA | 0   | 46 | RDR2-sensitive |
| GAGCAACAGGTAGGACGACACGCA  | 0   | 9  | RDR2-sensitive |
| GAGCAACTCTGCGAGACGGACTAG  | 0   | 11 | RDR2-sensitive |
| GAGCAACTCTGTGAGGTAGGACGA  | 0   | 13 | RDR2-sensitive |
| GAGCAAGCAGGACGCCTGAATCAT  | 0   | 28 | RDR2-sensitive |
| GAGCAAGGCTGTGAGGCGGGGCAA  | 0   | 10 | RDR2-sensitive |
| GAGCAAGTCTGTGAGACGTGACAG  | 0   | 11 | RDR2-sensitive |
| GAGCACACCGCTGTTCTTCGGGCA  | 0   | 12 | RDR2-sensitive |
| GAGCACACGTGAAGCCGTTGGAC   | 0   | 17 | RDR2-sensitive |
| GAGCACAGACTGTAGGTTGGAGAC  | 0   | 14 | RDR2-sensitive |
| GAGCACAGCGTCGATCTGAACGGC  | 1   | 16 | RDR2-sensitive |
| GAGCACAGGACTGTCAGGTGGCAC  | 2   | 16 | RDR2-sensitive |
| GAGCACAGGGACAGTAGGAGGGC   | 0   | 31 | RDR2-sensitive |
| GAGCACCGGACTGTCCGATGGCAC  | 0   | 33 | RDR2-sensitive |
| GAGCACCTGGTTGTCGGCGAAGTT  | 0   | 9  | RDR2-sensitive |
| GAGCACGGACGAGCAGAGAGACAG  | 0   | 9  | RDR2-sensitive |
| GAGCACGGACTGGACCGGCCCGAC  | 1   | 16 | RDR2-sensitive |
| GAGCAGAAGTGGGCTGATGTTGT   | 0   | 36 | RDR2-sensitive |
| GAGCAGAGGCTACGGAACGCGCAG  | 0   | 14 | RDR2-sensitive |
| GAGCAGATGTAGTACAACGTGCGC  | 1   | 24 | RDR2-sensitive |
| GAGCAGATTGGTCGCATCTCCAGA  | 0   | 16 | RDR2-sensitive |
| GAGCAGCAACGTCCGGCTACACTGG | 0   | 10 | RDR2-sensitive |
| GAGCAGCAGTCGGTTGGTGGAGGC  | 0   | 53 | RDR2-sensitive |
| GAGCAGCGACCGGAGATCTCCGAT  | 0   | 9  | RDR2-sensitive |
| GAGCAGCGGGCAGACGAACAGGGC  | 0   | 24 | RDR2-sensitive |
| GAGCAGCTGGGTTGGAGGAATCAA  | 23  | 3  | RDR2-resistant |
| GAGCAGGAACGTCCGACGACAGGAG | 0   | 14 | RDR2-sensitive |
| GAGCAGGACATTGGCGTTCTCGAT  | 0   | 45 | RDR2-sensitive |
| GAGCAGGACGGGAGGGAACGACGT  | 0   | 9  | RDR2-sensitive |
| GAGCAGGACGTGCATGGATCTCAA  | 0   | 9  | RDR2-sensitive |
| GAGCAGGACTCTCGGCACAGAAAT  | 0   | 10 | RDR2-sensitive |
| GAGCAGGACTCTCGGCACAGACTC  | 0   | 10 | RDR2-sensitive |
| GAGCAGGACTGGATCCCACGTGCA  | 0   | 51 | RDR2-sensitive |
| GAGCAGGACTGGGTCCCACGTGCA  | 1   | 14 | RDR2-sensitive |
| GAGCAGGCTGGGAACGGAGCGGCT  | 0   | 9  | RDR2-sensitive |
| GAGCAGGCTGTGAAGAGGATCATC  | 11  | 29 | RDR2-sensitive |
| GAGCAGGGGAGAGCGGGCTGGACA  | 37  | 7  | RDR2-resistant |
| GAGCAGTATTATCTCGGCACCTGT  | 0   | 46 | RDR2-sensitive |
| GAGCAGTCGCGATACTCGGATCGG  | 0   | 10 | RDR2-sensitive |
| GAGCAGTCTATCTCTGAGCGACGC  | 1   | 15 | RDR2-sensitive |
| GAGCATAGTGTAGACCATTTTCGT  | 0   | 15 | RDR2-sensitive |
| GAGCATATTTAGAAGTATCTGGTT  | 26  | 0  | RDR2-resistant |
| GAGCATCGGTGTGGAAGACGACTG  | 0   | 67 | RDR2-sensitive |
| GAGCATCGGTGTGGAGGACGACTG  | 0   | 18 | RDR2-sensitive |

|                           |    |     |                |
|---------------------------|----|-----|----------------|
| GAGCATCGTTGGACAATGGTTATG  | 30 | 2   | RDR2-resistant |
| GAGCATGTAGACGCCACCGACATT  | 0  | 25  | RDR2-sensitive |
| GAGCCAACGGATGACACTCGGCAA  | 0  | 12  | RDR2-sensitive |
| GAGCCAACGGTCCGAAGGAAGCAC  | 1  | 18  | RDR2-sensitive |
| GAGCCAACGGTCCGAAGGGGGCAC  | 4  | 38  | RDR2-sensitive |
| GAGCCAACTGGTAGATAGATGCGC  | 0  | 14  | RDR2-sensitive |
| GAGCCACAGCCAGTAGAAGACTCT  | 0  | 9   | RDR2-sensitive |
| GAGCCACTCCTGTGTCTAGATCGT  | 0  | 10  | RDR2-sensitive |
| GAGCCATACCGTGACTGAGACGTG  | 0  | 10  | RDR2-sensitive |
| GAGCCCACGGACTTAGATGGCCGA  | 0  | 9   | RDR2-sensitive |
| GAGCCCCCGCGGTACGGATCGTT   | 0  | 9   | RDR2-sensitive |
| GAGCCCGCGGACTTAGACGGTGTG  | 1  | 44  | RDR2-sensitive |
| GAGCCCGGTCTGCTTATTCGTCGA  | 0  | 11  | RDR2-sensitive |
| GAGCCCGTAGCAGTCGGACGGTGT  | 1  | 32  | RDR2-sensitive |
| GAGCCCTGTAGAAGCGTAGCTGGC  | 1  | 40  | RDR2-sensitive |
| GAGCCGACTGACTGAGCCGATCGA  | 0  | 10  | RDR2-sensitive |
| GAGCCGAGCTGAGATGGTTCTCTG  | 0  | 27  | RDR2-sensitive |
| GAGCCGGACCAGGTCCAGACGTCT  | 1  | 21  | RDR2-sensitive |
| GAGCCGGACGGTCCACGTGTGCAT  | 0  | 14  | RDR2-sensitive |
| GAGCCGGCTCGAGCTCGGAGCGGC  | 0  | 13  | RDR2-sensitive |
| GAGCCGGTAAGCTGACGAGGACGC  | 0  | 9   | RDR2-sensitive |
| GAGCCTCGGTCAGACGGGAGACGT  | 0  | 15  | RDR2-sensitive |
| GAGCCTGACTGAGATGAGCCATAA  | 0  | 11  | RDR2-sensitive |
| GAGCCTGCACTGAGCCGAGCCGAG  | 0  | 12  | RDR2-sensitive |
| GAGCCTGGACAGTGAGAAACGGAA  | 0  | 23  | RDR2-sensitive |
| GAGCCTGGCTGACGACGTGACCGC  | 3  | 21  | RDR2-sensitive |
| GAGCCTGGGCAGTTAGGACGCGGC  | 0  | 11  | RDR2-sensitive |
| GAGCCTGGGCTGTTGGTTTCGGCG  | 1  | 17  | RDR2-sensitive |
| GAGCCTTGCTAGTGCTATCGTCGA  | 0  | 15  | RDR2-sensitive |
| GAGCCTTGCTAGTGCTGTCGTCGA  | 3  | 134 | RDR2-sensitive |
| GAGCCTTGCTTCTTGGTCTGTCGCG | 0  | 9   | RDR2-sensitive |
| GAGCCTTGCTTCTTGGTCTGTCGCG | 2  | 24  | RDR2-sensitive |
| GAGCCTTGCTCAGACCTGTGGCGTA | 0  | 13  | RDR2-sensitive |
| GAGCGACACAGGAGGCCAAGGATA  | 23 | 0   | RDR2-resistant |
| GAGCGACGACGAGGACACGGGCAT  | 1  | 21  | RDR2-sensitive |
| GAGCGACGGATAGAGTTGGTGGAC  | 0  | 10  | RDR2-sensitive |
| GAGCGAGAGGACGGTCAAGGACAG  | 0  | 10  | RDR2-sensitive |
| GAGCGAGATCCAGGCGCCGTCGGC  | 0  | 14  | RDR2-sensitive |
| GAGCGAGATCCAGGCGCCGTCGGT  | 0  | 9   | RDR2-sensitive |
| GAGCGAGGGACTCGGACACTCGGC  | 0  | 25  | RDR2-sensitive |
| GAGCGAGTTAGCTGATCGGTTCCG  | 0  | 13  | RDR2-sensitive |
| GAGCGATCTGTAGAAGCGTGTCAT  | 1  | 37  | RDR2-sensitive |
| GAGCGATGTAGGGAGGATGGGCGT  | 0  | 25  | RDR2-sensitive |
| GAGCGCAGCGCGGCAGAACATGGC  | 0  | 12  | RDR2-sensitive |
| GAGCGCAGGACTCTGCCGAGGGCG  | 0  | 11  | RDR2-sensitive |
| GAGCGCATGAACGTCCGACGCTGG  | 0  | 28  | RDR2-sensitive |
| GAGCGCCATATTGAGCGGTCCGGAC | 0  | 10  | RDR2-sensitive |
| GAGCGCGCTGTCCGGCGGCCACCA  | 25 | 4   | RDR2-resistant |
| GAGCGCGGAGGCGAGGATGTCGGG  | 0  | 10  | RDR2-sensitive |

|                           |      |     |                |
|---------------------------|------|-----|----------------|
| GAGCGCTGTAGGGGGCACCGCTGC  | 0    | 10  | RDR2-sensitive |
| GAGCGGAACAACTACGGTTCGAAA  | 0    | 30  | RDR2-sensitive |
| GAGCGAACGACGGTAGAACACAC   | 0    | 9   | RDR2-sensitive |
| GAGCGGAGCACGTAGGGCAGAGGC  | 0    | 9   | RDR2-sensitive |
| GAGCGGAGCTGAGACAAGTCGGC   | 15   | 0   | RDR2-resistant |
| GAGCGGATGATGGTGCCTGATCGT  | 0    | 9   | RDR2-sensitive |
| GAGCGGATGGACGTCAAACAGGAC  | 0    | 15  | RDR2-sensitive |
| GAGCGGGATGAGAACGGAGCGGCT  | 0    | 31  | RDR2-sensitive |
| GAGCGGGATGGGAACAGAGCGGCT  | 0    | 15  | RDR2-sensitive |
| GAGCGGGATGGGAACGGAGCGGCT  | 4    | 93  | RDR2-sensitive |
| GAGCGGGATGTTGTCGGTTCGGAG  | 0    | 13  | RDR2-sensitive |
| GAGCGGGATTGGAACGGAGCGGCT  | 3    | 117 | RDR2-sensitive |
| GAGCGGGCTAGGAACAGAGCGGCT  | 0    | 15  | RDR2-sensitive |
| GAGCGGGCTGAGAACGGAGCGGCT  | 2    | 16  | RDR2-sensitive |
| GAGCGGGCTGAGAATGGAGCGGCT  | 0    | 9   | RDR2-sensitive |
| GAGCGGGCTGGACAGCGGCTGGGA  | 1469 | 245 | RDR2-resistant |
| GAGCGGGCTGGACAGCGGCTGGGG  | 145  | 31  | RDR2-resistant |
| GAGCGGGCTGGACAGCGGCTGGGT  | 24   | 1   | RDR2-resistant |
| GAGCGGGCTGGGAACGAAGCGGCT  | 0    | 16  | RDR2-sensitive |
| GAGCGGGCTGGGAACGGAGCGGCT  | 5    | 130 | RDR2-sensitive |
| GAGCGGGCTGGGAACGGAGTGGCT  | 1    | 20  | RDR2-sensitive |
| GAGCGGGCTGGGCAGCGACTGGGA  | 39   | 0   | RDR2-resistant |
| GAGCGGGCTGTTTGGGCGCACAAAC | 0    | 13  | RDR2-sensitive |
| GAGCGGGTTGAGAACGAAGCGGCT  | 0    | 35  | RDR2-sensitive |
| GAGCGGGTTGGGAACGGAGCGGCT  | 0    | 9   | RDR2-sensitive |
| GAGCGGTACTTCGGACAGACGCGA  | 0    | 15  | RDR2-sensitive |
| GAGCGGTGATTGAGCTCACGACGG  | 0    | 9   | RDR2-sensitive |
| GAGCGTACGCCGGCATGCAGGCTC  | 0    | 9   | RDR2-sensitive |
| GAGCGTAGTCTGAATGTACGAGCA  | 0    | 10  | RDR2-sensitive |
| GAGCGTCCGACGGCTCAGCAACTC  | 0    | 11  | RDR2-sensitive |
| GAGCGTCCGACGGCGTGCTGTTCAC | 1    | 13  | RDR2-sensitive |
| GAGCGTGACCGACGAGCTAAGGCT  | 0    | 11  | RDR2-sensitive |
| GAGCGTGACGACTGGGCAGTGGAC  | 0    | 11  | RDR2-sensitive |
| GAGCGTGACTGCATGAGGAGGGTG  | 0    | 9   | RDR2-sensitive |
| GAGCGTGACTGTGCGAGCGGGCTG  | 0    | 11  | RDR2-sensitive |
| GAGCGTGATCAAGCACTGGACGA   | 0    | 9   | RDR2-sensitive |
| GAGCGTTCGCGGGGACGAGGACGG  | 0    | 15  | RDR2-sensitive |
| GAGCGTTCGCGGGGACGGGGACGG  | 0    | 17  | RDR2-sensitive |
| GAGCGTTGGGTAGAGAGCGAGGTA  | 0    | 61  | RDR2-sensitive |
| GAGCTACAGTTACGGTCTGCAGGA  | 0    | 9   | RDR2-sensitive |
| GAGCTAGACGCCACGTAGACACTA  | 0    | 19  | RDR2-sensitive |
| GAGCTAGCTCTGACAGTAGACGTT  | 0    | 17  | RDR2-sensitive |
| GAGCTAGCTTGGATCGTCGACACA  | 0    | 15  | RDR2-sensitive |
| GAGCTCAGTCCTGCTGTAGATGGT  | 0    | 20  | RDR2-sensitive |
| GAGCTCATTGGACTGGCCGGGCA   | 1    | 40  | RDR2-sensitive |
| GAGCTCCCACGGTTCGTCGGAAGC  | 0    | 12  | RDR2-sensitive |
| GAGCTCCTCGTTGGACATGGCGTC  | 0    | 21  | RDR2-sensitive |
| GAGCTCCTGCACCAGGTCGCGGAC  | 8    | 271 | RDR2-sensitive |
| GAGCTCGACGTCAGGATTTATGCC  | 0    | 17  | RDR2-sensitive |

|                           |    |    |                |
|---------------------------|----|----|----------------|
| GAGCTCGGACAGGAAAACGTGCCT  | 0  | 10 | RDR2-sensitive |
| GAGCTCGGACAGGAAACTAGGCAT  | 0  | 17 | RDR2-sensitive |
| GAGCTCGGGTTCCTGCCTGACGG   | 4  | 19 | RDR2-sensitive |
| GAGCTCGTTTCTGTGGAGCCAGGC  | 1  | 47 | RDR2-sensitive |
| GAGCTCTCGGCACAGGGACTGGCG  | 0  | 12 | RDR2-sensitive |
| GAGCTCTGCGGCAGTGCGGACG    | 0  | 19 | RDR2-sensitive |
| GAGCTCTGGGTTGTGCGGCTGTGT  | 0  | 9  | RDR2-sensitive |
| GAGCTCTGTTGGAACGGTAAACAA  | 0  | 20 | RDR2-sensitive |
| GAGCTGACCACGAACCGAGCGAGC  | 0  | 10 | RDR2-sensitive |
| GAGCTGACCATGAAACGAGCGAGC  | 0  | 20 | RDR2-sensitive |
| GAGCTGACCATGAACCAAGCGAGC  | 0  | 16 | RDR2-sensitive |
| GAGCTGACCATGAACCGAGCGAGA  | 0  | 13 | RDR2-sensitive |
| GAGCTGACCATGAACCGAGCGAGC  | 4  | 94 | RDR2-sensitive |
| GAGCTGACCCTGAAACGAGCGAGC  | 0  | 14 | RDR2-sensitive |
| GAGCTGACGCGGCGTTCGACGTGGC | 0  | 10 | RDR2-sensitive |
| GAGCTGACTATGAACCGAGCGAGC  | 0  | 23 | RDR2-sensitive |
| GAGCTGACTTGGACTCGCAGCAGA  | 0  | 21 | RDR2-sensitive |
| GAGCTGAGAGTTGGACGAATCGGA  | 0  | 9  | RDR2-sensitive |
| GAGCTGAGGATGTGAGGACGGAAG  | 0  | 19 | RDR2-sensitive |
| GAGCTGAGTCTGCTGTAGATGGT   | 0  | 19 | RDR2-sensitive |
| GAGCTGAGTCTTGGCTGTACACAG  | 0  | 22 | RDR2-sensitive |
| GAGCTGGACGGCGTTGTTGACTGC  | 0  | 22 | RDR2-sensitive |
| GAGCTGGAGACGCGCTGGAGCTGC  | 0  | 9  | RDR2-sensitive |
| GAGCTGGAGCTCTGGACATGGCAG  | 0  | 13 | RDR2-sensitive |
| GAGCTGGCGAATCTGACTGGCAGT  | 17 | 0  | RDR2-resistant |
| GAGCTGGCTCAAACCTCGAAGCGGT | 0  | 12 | RDR2-sensitive |
| GAGCTGGGCAGAGCAGAGGGACAA  | 1  | 14 | RDR2-sensitive |
| GAGCTGGTTCGACCGTTGGAGGCTT | 0  | 9  | RDR2-sensitive |
| GAGCTGTACGGGCATCAACGCTAT  | 0  | 14 | RDR2-sensitive |
| GAGCTGTGCTTGGACCTGAGTCGG  | 0  | 25 | RDR2-sensitive |
| GAGCTGTGGAATGCGGATACTACC  | 0  | 45 | RDR2-sensitive |
| GAGCTGTGTCTCAGAACCGACGTC  | 0  | 10 | RDR2-sensitive |
| GAGCTGTGTGACGTGGCAGTCTGC  | 0  | 11 | RDR2-sensitive |
| GAGCTGTGTTACATCGACGCCATA  | 0  | 9  | RDR2-sensitive |
| GAGCTGTGTTACCTCGGCGCCATA  | 0  | 9  | RDR2-sensitive |
| GAGCTTAGCCCACTGGACACGGAG  | 0  | 12 | RDR2-sensitive |
| GAGCTTATCGGAGGACTGACCGGT  | 23 | 0  | RDR2-resistant |
| GAGCTTGACTCTAGTCCGACTTTG  | 58 | 2  | RDR2-resistant |
| GAGCTTGACTGCGGCGTAGGCCT   | 5  | 66 | RDR2-sensitive |
| GAGCTTGGGTCCTCTGCCTGACGG  | 0  | 18 | RDR2-sensitive |
| GAGGAAACCGTAGCTCGGGGACGG  | 0  | 11 | RDR2-sensitive |
| GAGGAACACGGTACGTCTGTTAAA  | 0  | 11 | RDR2-sensitive |
| GAGGAACACTGAACGCCGCGACGA  | 0  | 12 | RDR2-sensitive |
| GAGGAACAGAAGACAAGCGCTCAA  | 0  | 39 | RDR2-sensitive |
| GAGGAACCACAGTGTAGACATCAT  | 0  | 12 | RDR2-sensitive |
| GAGGAACCAGGCTCGGCTCGGCTC  | 2  | 14 | RDR2-sensitive |
| GAGGAACCGAACCGAACCGAAGAA  | 0  | 26 | RDR2-sensitive |
| GAGGAACCGGAAGCGGAACGTGAA  | 0  | 9  | RDR2-sensitive |
| GAGGAACGGGAACGAGGAACACGG  | 1  | 26 | RDR2-sensitive |

|                           |   |    |                |
|---------------------------|---|----|----------------|
| GAGGAACGGGAACGAGGAACGCGG  | 0 | 11 | RDR2-sensitive |
| GAGGAACGGGAACGTGGTACGCGG  | 0 | 21 | RDR2-sensitive |
| GAGGAACGGTGGCTGCATGAGTGG  | 0 | 10 | RDR2-sensitive |
| GAGGAACGGTGTCTGCATGAGTTG  | 0 | 21 | RDR2-sensitive |
| GAGGAACTCGCAGGAGAAGCCCCT  | 0 | 12 | RDR2-sensitive |
| GAGGAACTCTAGAATGCTCGCGGT  | 0 | 10 | RDR2-sensitive |
| GAGGAACTCTATGGTTCGACGCGGT | 0 | 25 | RDR2-sensitive |
| GAGGAACTGGCAGAGACAACGGGT  | 0 | 10 | RDR2-sensitive |
| GAGGAAGGACGAAGGAGAAGGAGC  | 0 | 9  | RDR2-sensitive |
| GAGGAAGTTGGGTTTCGACGGTGAA | 0 | 12 | RDR2-sensitive |
| GAGGAATAACAGCGTAGACGGTTC  | 0 | 17 | RDR2-sensitive |
| GAGGAATGGATTGGGAAGGGACGG  | 0 | 11 | RDR2-sensitive |
| GAGGAATGGATTGGGGAGGGATGG  | 0 | 13 | RDR2-sensitive |
| GAGGAATGGATTGTGGAGGGATGG  | 0 | 12 | RDR2-sensitive |
| GAGGACAACAGTGACACACAGAAG  | 0 | 13 | RDR2-sensitive |
| GAGGACAACAGTGGCACACAGAAG  | 0 | 19 | RDR2-sensitive |
| GAGGACAACAGTGGCATAACAGAAG | 0 | 22 | RDR2-sensitive |
| GAGGACAACGACAAGGACGAGCTG  | 0 | 13 | RDR2-sensitive |
| GAGGACACCACCTAGAGACGACAA  | 0 | 11 | RDR2-sensitive |
| GAGGACACCAGAAGACGTCTCTGT  | 1 | 15 | RDR2-sensitive |
| GAGGACACCAGGGGACGTCTCTGT  | 0 | 10 | RDR2-sensitive |
| GAGGACAGACACAGTAGGCGCCCT  | 0 | 15 | RDR2-sensitive |
| GAGGACAGACTCCGGGAGACCCGT  | 0 | 23 | RDR2-sensitive |
| GAGGACAGGGAGACACTCGGCGGC  | 1 | 13 | RDR2-sensitive |
| GAGGACAGGGAGGCGCTCGACGGC  | 5 | 27 | RDR2-sensitive |
| GAGGACAGGGAGGCGCTCGGCGGC  | 8 | 45 | RDR2-sensitive |
| GAGGACAGTAGAAGACGACAGCTC  | 0 | 9  | RDR2-sensitive |
| GAGGACAGTGAGGACTGAGGAGGC  | 0 | 18 | RDR2-sensitive |
| GAGGACATAGCTGTGGGCTGGCTT  | 0 | 13 | RDR2-sensitive |
| GAGGACATGACAGAGCAGGCCGTG  | 0 | 12 | RDR2-sensitive |
| GAGGACATGGACGCGACCATTCAA  | 0 | 14 | RDR2-sensitive |
| GAGGACATGGAGTAGCAGAGTGTG  | 0 | 9  | RDR2-sensitive |
| GAGGACCAGAGCAGCAGACAGCCC  | 0 | 9  | RDR2-sensitive |
| GAGGACCATCATTATCGTGCGGAG  | 3 | 92 | RDR2-sensitive |
| GAGGACCATCATTATCGTGCGGAT  | 0 | 12 | RDR2-sensitive |
| GAGGACCATTTAGAGGACGTTGCT  | 0 | 11 | RDR2-sensitive |
| GAGGACCCCTCCAGCAACGGACA   | 0 | 9  | RDR2-sensitive |
| GAGGACCCGCAGCTGGACGTCCGG  | 0 | 9  | RDR2-sensitive |
| GAGGACCCTAGCGACGGGCGACGT  | 0 | 9  | RDR2-sensitive |
| GAGGACCGACACGTAGAGGGCGCT  | 0 | 37 | RDR2-sensitive |
| GAGGACCGACACGTAGGAGGCGCT  | 0 | 11 | RDR2-sensitive |
| GAGGACCGACACGTAGGGGACGCT  | 0 | 10 | RDR2-sensitive |
| GAGGACCGACACGTAGGGGGCGCT  | 2 | 16 | RDR2-sensitive |
| GAGGACCGACGCGTAGGGGGCACC  | 0 | 16 | RDR2-sensitive |
| GAGGACCGAGATAAGACAGACTAG  | 0 | 10 | RDR2-sensitive |
| GAGGACCGAGGACATCGACGGAGA  | 1 | 31 | RDR2-sensitive |
| GAGGACCGATCTGAACAGGGCATG  | 0 | 18 | RDR2-sensitive |
| GAGGACCGTTTCAGAGGACGCTGCT | 0 | 14 | RDR2-sensitive |
| GAGGACCGTTTAGAGGACGCTGCT  | 5 | 26 | RDR2-sensitive |



|                           |    |     |                |
|---------------------------|----|-----|----------------|
| GAGGACCGTTTAGAGGACGTTGCT  | 24 | 268 | RDR2-sensitive |
| GAGGACCGTTTAGAGGACGTTGTT  | 6  | 46  | RDR2-sensitive |
| GAGGACCTCTGGTGACCGTCGGAT  | 0  | 10  | RDR2-sensitive |
| GAGGACCTGCCGACTTGACGGAGA  | 0  | 9   | RDR2-sensitive |
| GAGGACCTGCCGGCTTGACGGAGA  | 0  | 12  | RDR2-sensitive |
| GAGGACCTTCGGAAGCCGAAGACC  | 0  | 9   | RDR2-sensitive |
| GAGGACCTTCGGAGGACGAAGACC  | 0  | 9   | RDR2-sensitive |
| GAGGACCTTGTTGGAGGCGTACAG  | 0  | 14  | RDR2-sensitive |
| GAGGACCTTGTTGGAGGCGTAGAG  | 0  | 32  | RDR2-sensitive |
| GAGGACGACGACGACGAAGACGAT  | 0  | 13  | RDR2-sensitive |
| GAGGACGACGCCATACTCTTGATT  | 0  | 11  | RDR2-sensitive |
| GAGGACGACGCTGCGGACGGGCTG  | 0  | 25  | RDR2-sensitive |
| GAGGACGACTAGAAACGGATCCAG  | 0  | 23  | RDR2-sensitive |
| GAGGACGAGGACGTCATCTACTCC  | 0  | 11  | RDR2-sensitive |
| GAGGACGAGGCACTAGGGCGGAGC  | 0  | 15  | RDR2-sensitive |
| GAGGACGAGGCGTTGGGACGGAGC  | 0  | 9   | RDR2-sensitive |
| GAGGACGAGTAGGGATGGCAATGG  | 0  | 10  | RDR2-sensitive |
| GAGGACGCAGGATATGACGGATGC  | 3  | 107 | RDR2-sensitive |
| GAGGACGCGGCTCTAGTCGGATGG  | 17 | 0   | RDR2-resistant |
| GAGGACGCTCCTGAAGACGTAGAG  | 0  | 9   | RDR2-sensitive |
| GAGGACGGAATGAGAATGGCAGAA  | 0  | 13  | RDR2-sensitive |
| GAGGACGGAATGGGAATGGCAGAA  | 1  | 37  | RDR2-sensitive |
| GAGGACGGAGCCAGGCAACGACGC  | 0  | 11  | RDR2-sensitive |
| GAGGACGGCACACAGATCTCCGAT  | 0  | 10  | RDR2-sensitive |
| GAGGACGGGCTGACGAACAGGCTC  | 2  | 21  | RDR2-sensitive |
| GAGGACGGTATAGAGTGCCTTGCT  | 0  | 9   | RDR2-sensitive |
| GAGGACGGTGCACGGTCTGCCGT   | 0  | 12  | RDR2-sensitive |
| GAGGACGGTGGAAAGGTGGACGGGC | 0  | 10  | RDR2-sensitive |
| GAGGACGGTTTTCGATGGACCAGAG | 0  | 10  | RDR2-sensitive |
| GAGGACGTAAAGGACGCCGGCGTC  | 0  | 9   | RDR2-sensitive |
| GAGGACGTCATCTACTCACTCCAG  | 1  | 21  | RDR2-sensitive |
| GAGGACGTCATCTACTCCCTCCAG  | 0  | 17  | RDR2-sensitive |
| GAGGACGTGAAGGACGCCGACGAC  | 31 | 0   | RDR2-resistant |
| GAGGACGTGAAGGACGCCGGCGAC  | 1  | 13  | RDR2-sensitive |
| GAGGACGTGACGCTGATGCCGGAC  | 0  | 9   | RDR2-sensitive |
| GAGGACGTGCAGTACTGCCGTGCG  | 0  | 12  | RDR2-sensitive |
| GAGGACGTTGTTGGAGAGGAAGGA  | 0  | 10  | RDR2-sensitive |
| GAGGACTACAGAGCGAGAGATCGG  | 0  | 19  | RDR2-sensitive |
| GAGGACTAGACCAGTGGACTGCTC  | 0  | 21  | RDR2-sensitive |
| GAGGACTAGACTGAGACGGAGGAC  | 1  | 26  | RDR2-sensitive |
| GAGGACTAGGCCATAGGCCGGCT   | 2  | 27  | RDR2-sensitive |
| GAGGACTATGACAATGAGGACCGA  | 1  | 18  | RDR2-sensitive |
| GAGGACTCCGCAACCAGACTCCGG  | 0  | 14  | RDR2-sensitive |
| GAGGACTCGAATTTGAAGGGCGGT  | 0  | 10  | RDR2-sensitive |
| GAGGACTGAACCGAGTAGGACGAG  | 0  | 12  | RDR2-sensitive |
| GAGGACTGACACGGTGTTAACGTA  | 0  | 12  | RDR2-sensitive |
| GAGGACTGACGCGGAGGCCGACGT  | 0  | 21  | RDR2-sensitive |
| GAGGACTGCGGCCCAAGTCGTGAA  | 2  | 19  | RDR2-sensitive |
| GAGGACTGGACAGAGGTGGATGCC  | 36 | 2   | RDR2-resistant |

|                           |    |     |                |
|---------------------------|----|-----|----------------|
| GAGGACTGGCGCGTGGTCAACCAC  | 0  | 16  | RDR2-sensitive |
| GAGGACTGTCCGGCCTATAGGCGT  | 0  | 19  | RDR2-sensitive |
| GAGGACTGTGCGGACGGTGGTTGG  | 2  | 58  | RDR2-sensitive |
| GAGGACTTGGATTTGAAGGGCGGT  | 0  | 9   | RDR2-sensitive |
| GAGGACTTTAGCGTCGGCCGCTGC  | 0  | 11  | RDR2-sensitive |
| GAGGAGAAATCCGTCGATTGCCGG  | 0  | 53  | RDR2-sensitive |
| GAGGAGAAGAGACTCATGCCCGAC  | 81 | 10  | RDR2-resistant |
| GAGGAGAAGCAGGCTTCTGAAGCT  | 0  | 13  | RDR2-sensitive |
| GAGGAGAATCTGGCTGTACGGAAA  | 0  | 9   | RDR2-sensitive |
| GAGGAGACCGTAGCAGAGACTGTA  | 0  | 12  | RDR2-sensitive |
| GAGGAGACGAAGACATCGAGCGAA  | 0  | 13  | RDR2-sensitive |
| GAGGAGACTGTAAAGGACGGATAT  | 3  | 194 | RDR2-sensitive |
| GAGGAGACTGTGGATGCAGGTTAT  | 0  | 10  | RDR2-sensitive |
| GAGGAGAGAGAACGCTGACGTGGC  | 0  | 28  | RDR2-sensitive |
| GAGGAGAGAGAATGTGTCGGCCGC  | 0  | 43  | RDR2-sensitive |
| GAGGAGAGATGATGACGACGCCAC  | 0  | 9   | RDR2-sensitive |
| GAGGAGATGGTAGACTAATGTTCC  | 38 | 2   | RDR2-resistant |
| GAGGAGCAAGTAGAACGGAGTCGT  | 0  | 9   | RDR2-sensitive |
| GAGGAGCAGGAACGTCGACGACAG  | 3  | 30  | RDR2-sensitive |
| GAGGAGCCAAGTAGAACGGAGCCG  | 0  | 23  | RDR2-sensitive |
| GAGGAGCCAAGTAGAACGGAGTCG  | 0  | 23  | RDR2-sensitive |
| GAGGAGCCCGTAGAAGACACGCTA  | 0  | 9   | RDR2-sensitive |
| GAGGAGCGAGAAGATGATGGACTA  | 0  | 21  | RDR2-sensitive |
| GAGGAGCTGACCAGAGCATGCCAA  | 1  | 12  | RDR2-sensitive |
| GAGGAGCTGTTTTAAGGGAGGGTG  | 0  | 32  | RDR2-sensitive |
| GAGGAGGACCTGTCTGAGCAGAGG  | 0  | 12  | RDR2-sensitive |
| GAGGAGGATAGTGACCAGAGCCGG  | 43 | 0   | RDR2-resistant |
| GAGGAGGATGAAGCATTTCGACGAC | 15 | 0   | RDR2-resistant |
| GAGGAGGCAGAACCGTGCACCACA  | 0  | 10  | RDR2-sensitive |
| GAGGAGGCGGTACGTCAACCCTGA  | 0  | 28  | RDR2-sensitive |
| GAGGAGGCTGTAGTCGAGCGGCAT  | 0  | 10  | RDR2-sensitive |
| GAGGAGGCTGTAGTCGAGTGGCGT  | 0  | 14  | RDR2-sensitive |
| GAGGAGGGATGAATAAGGCTGCAG  | 0  | 10  | RDR2-sensitive |
| GAGGAGGGCAGAACGGCAGAACAG  | 0  | 65  | RDR2-sensitive |
| GAGGAGGGCGGGGTTGATGTTGGA  | 27 | 4   | RDR2-resistant |
| GAGGAGGTGGTGGCTATGTTTCTA  | 26 | 1   | RDR2-resistant |
| GAGGAGTAAGAAGATGATGGACTA  | 0  | 18  | RDR2-sensitive |
| GAGGAGTCAAGTAGAACGGGCTGT  | 0  | 9   | RDR2-sensitive |
| GAGGAGTCTAGCTGGAACGGATAT  | 0  | 12  | RDR2-sensitive |
| GAGGAGTGAGAAGACGATGGACTA  | 0  | 10  | RDR2-sensitive |
| GAGGAGTGAGAAGATGATGGACTA  | 0  | 15  | RDR2-sensitive |
| GAGGAGTGAGGAGAATTTGGCTGT  | 0  | 37  | RDR2-sensitive |
| GAGGAGTGGTAGAAGGATAGCTAC  | 0  | 13  | RDR2-sensitive |
| GAGGAGTGTGACGGCTCGCAAGAG  | 37 | 1   | RDR2-resistant |
| GAGGATAACCGACGCGAGCAGCAT  | 0  | 23  | RDR2-sensitive |
| GAGGATACCCGATGGACGAAGACG  | 0  | 9   | RDR2-sensitive |
| GAGGATACTGTACGGGAAGGTCGG  | 0  | 12  | RDR2-sensitive |
| GAGGATAGCGGTGTACTGTAGCCC  | 0  | 11  | RDR2-sensitive |
| GAGGATAGTCGACGCAAGCAGCAT  | 0  | 20  | RDR2-sensitive |

|                           |     |     |                |
|---------------------------|-----|-----|----------------|
| GAGGATAGTGACCAGAGCCGGACG  | 54  | 0   | RDR2-resistant |
| GAGGATCGATTTGGCACTCGGCAA  | 0   | 12  | RDR2-sensitive |
| GAGGATCGTGCAACAGGAGGCATC  | 133 | 11  | RDR2-resistant |
| GAGGATCTAGAGGAGCCGTGCCAA  | 0   | 14  | RDR2-sensitive |
| GAGGATCTAGAGGAGTCGTGCCAA  | 0   | 16  | RDR2-sensitive |
| GAGGATCTCCACTCTGAAGGACGA  | 1   | 24  | RDR2-sensitive |
| GAGGATCTGAAGGAGCCGTGCCAA  | 0   | 10  | RDR2-sensitive |
| GAGGATCTGGAGGAGCCGTGCCAA  | 1   | 14  | RDR2-sensitive |
| GAGGATGAAGACCGAGGTGGGCGT  | 1   | 42  | RDR2-sensitive |
| GAGGATGACGGCCTGTCATGACAA  | 0   | 13  | RDR2-sensitive |
| GAGGATGAGGATGACGGGTGACAC  | 0   | 121 | RDR2-sensitive |
| GAGGATGCTGAACTCCAGCACGGC  | 0   | 22  | RDR2-sensitive |
| GAGGATGGAATCGCAATCGGACGG  | 0   | 14  | RDR2-sensitive |
| GAGGATGGAGAACCGGAGCGAGGC  | 0   | 10  | RDR2-sensitive |
| GAGGATGGCAGAACGGCAGACTAC  | 0   | 35  | RDR2-sensitive |
| GAGGATGGCAGAATACGGTGAAT   | 0   | 9   | RDR2-sensitive |
| GAGGATGGCATTGCTGGACCCCGG  | 0   | 9   | RDR2-sensitive |
| GAGGATGGGATGGGTATGAGACGC  | 0   | 18  | RDR2-sensitive |
| GAGGATGGGTATAGGGATGGATCA  | 0   | 9   | RDR2-sensitive |
| GAGGATGGTGGCAGAACCGTGAC   | 0   | 12  | RDR2-sensitive |
| GAGGATGTGCTAGATTCGGCTTCT  | 22  | 1   | RDR2-resistant |
| GAGGATTACGCGGCAAAACCTGGC  | 0   | 10  | RDR2-sensitive |
| GAGGATTCTCTGGATAGAGGGCGC  | 0   | 13  | RDR2-sensitive |
| GAGGATTCTTGCAGCTGACGACGC  | 0   | 12  | RDR2-sensitive |
| GAGGATTGTGCGGCAGAACATGGC  | 0   | 20  | RDR2-sensitive |
| GAGGATTGTGCGGCAGAACATGGT  | 0   | 9   | RDR2-sensitive |
| GAGGATTGTTTAGAGGACGTTGTT  | 1   | 12  | RDR2-sensitive |
| GAGGATTTCCGACTCCGACGGTA   | 0   | 17  | RDR2-sensitive |
| GAGGATTTTGACTTGTAGGGGATT  | 0   | 11  | RDR2-sensitive |
| GAGGCAAGCAGACATACATGACAC  | 0   | 11  | RDR2-sensitive |
| GAGGCACGTAGGACTGTGCAGGCC  | 0   | 28  | RDR2-sensitive |
| GAGGCACTAGTTTGAGGCATTGTT  | 0   | 12  | RDR2-sensitive |
| GAGGCACTATAGAGGGCACCGCTG  | 0   | 11  | RDR2-sensitive |
| GAGGCACTGTTGGAGTGGTTTTTC  | 0   | 22  | RDR2-sensitive |
| GAGGCAGAACGATGGCACATGTGC  | 0   | 13  | RDR2-sensitive |
| GAGGCAGAATGGTTGCGTGA ACTC | 0   | 10  | RDR2-sensitive |
| GAGGCAGAGCTTTCGGCCCGTCGG  | 1   | 13  | RDR2-sensitive |
| GAGGCAGAGGACCCAACCTGACGC  | 0   | 12  | RDR2-sensitive |
| GAGGCAGTTCGAGTCGGACGGTCA  | 0   | 17  | RDR2-sensitive |
| GAGGCATATATAGGACGAGGATGT  | 0   | 9   | RDR2-sensitive |
| GAGGCATCACGTAGAGACCGGCAT  | 0   | 9   | RDR2-sensitive |
| GAGGCATGTCATAGGTAGAGCGGT  | 0   | 10  | RDR2-sensitive |
| GAGGCATGTGGTCCATGGATGGTG  | 18  | 1   | RDR2-resistant |
| GAGGCCAGAAGATTCTGCAGGTT   | 22  | 0   | RDR2-resistant |
| GAGGCCATAGACCAGAGGACAGAC  | 1   | 22  | RDR2-sensitive |
| GAGGCCCAAACATACTGTCGTCGT  | 0   | 13  | RDR2-sensitive |
| GAGGCCAAAGAGAACAAGAGGCAA  | 0   | 11  | RDR2-sensitive |
| GAGGCCCGTGAGCTCGGCACGAAG  | 0   | 11  | RDR2-sensitive |
| GAGGCCAAGACTGGACGATCGAGT  | 0   | 9   | RDR2-sensitive |

|                           |    |    |                |
|---------------------------|----|----|----------------|
| GAGGCGACTGTTGAACCCTTCGGA  | 2  | 16 | RDR2-sensitive |
| GAGGCGAGGACTCTCGGACGGAAT  | 0  | 15 | RDR2-sensitive |
| GAGGCGCTGTAGGGGCACCGCTGC  | 1  | 49 | RDR2-sensitive |
| GAGGCGGCATGCAGGACAGACGGC  | 2  | 17 | RDR2-sensitive |
| GAGGCGTTAAGACTGAGATGGCTT  | 0  | 20 | RDR2-sensitive |
| GAGGCTACAGTTACAACCGTCGGA  | 0  | 14 | RDR2-sensitive |
| GAGGCTAGGCTCGGACGAGGCGTG  | 1  | 17 | RDR2-sensitive |
| GAGGCTAGGGTTCCTGTCTGACGG  | 0  | 9  | RDR2-sensitive |
| GAGGCTCGGTGGAATAGCAAGACG  | 0  | 16 | RDR2-sensitive |
| GAGGCTCTGTGAATAGTTGTTGAC  | 47 | 0  | RDR2-resistant |
| GAGGCTGAAACATCGGAGCGACGA  | 0  | 11 | RDR2-sensitive |
| GAGGCTGAACTCGGGGGAGGTCGT  | 0  | 10 | RDR2-sensitive |
| GAGGCTGAGTCAGACGTGTGGTAG  | 0  | 17 | RDR2-sensitive |
| GAGGCTGGACGGTCTGCACTTAGT  | 0  | 11 | RDR2-sensitive |
| GAGGCTGGACTCGGGTAAGATCGC  | 0  | 9  | RDR2-sensitive |
| GAGGCTGGAGCTCGAACCCGGTAC  | 0  | 11 | RDR2-sensitive |
| GAGGCTGGGCTCGGATGAGGTCGC  | 0  | 17 | RDR2-sensitive |
| GAGGCTGTAATTGAGGAGGGGCTT  | 0  | 13 | RDR2-sensitive |
| GAGGCTGTCAGATCCGACGCGCAT  | 0  | 15 | RDR2-sensitive |
| GAGGCTGTGCTGGACGAGGGACGC  | 0  | 10 | RDR2-sensitive |
| GAGGCTGTGGATGCGAGACGCTAT  | 0  | 11 | RDR2-sensitive |
| GAGGCTGTGGATGCGGGACGCTAA  | 0  | 11 | RDR2-sensitive |
| GAGGCTTTGGAAAGTTGGACCGGT  | 22 | 0  | RDR2-resistant |
| GAGGGAAGAGTAGAGGATGATGAT  | 37 | 2  | RDR2-resistant |
| GAGGGAAGCATGGTACAACCTACC  | 0  | 14 | RDR2-sensitive |
| GAGGGAAGGGAGCGGATCTGGTGA  | 4  | 20 | RDR2-sensitive |
| GAGGGAATCGGAAAGGCAGAACAC  | 0  | 12 | RDR2-sensitive |
| GAGGGACAACAGAGGACAACACTA  | 1  | 21 | RDR2-sensitive |
| GAGGGACAACAGAGGACAACGCAG  | 1  | 17 | RDR2-sensitive |
| GAGGGACAACAGGGGACAACACAG  | 18 | 67 | RDR2-sensitive |
| GAGGGACAACAGGGGACAACACTA  | 6  | 24 | RDR2-sensitive |
| GAGGGACAACAGGGGACAACACTG  | 7  | 39 | RDR2-sensitive |
| GAGGGACAGACGGACAGCAGCCAG  | 0  | 9  | RDR2-sensitive |
| GAGGGACCGTTTGAGAGAGGGAAG  | 3  | 16 | RDR2-sensitive |
| GAGGGACGGATCGGGATGGCAGAA  | 0  | 11 | RDR2-sensitive |
| GAGGGACTAGCGACATGGTCACAG  | 0  | 10 | RDR2-sensitive |
| GAGGGACTATACTGCGTACATCTG  | 0  | 33 | RDR2-sensitive |
| GAGGGACTCGGACACTCGGCAAAG  | 0  | 12 | RDR2-sensitive |
| GAGGGACTGACGGGTTATTCCGAT  | 1  | 15 | RDR2-sensitive |
| GAGGGACTGCACAGCGTACATCTT  | 15 | 92 | RDR2-sensitive |
| GAGGGACTGCACGACGTACATCTT  | 1  | 12 | RDR2-sensitive |
| GAGGGACTGCACTGCGTACACCTT  | 2  | 20 | RDR2-sensitive |
| GAGGGACTGCACTGCGTACATCTA  | 3  | 16 | RDR2-sensitive |
| GAGGGACTGCACTGCGTACATCTG  | 8  | 60 | RDR2-sensitive |
| GAGGGACTGCACTGCGTACATCTT  | 9  | 60 | RDR2-sensitive |
| GAGGGACTGTACTGCGTACACCTG  | 0  | 9  | RDR2-sensitive |
| GAGGGACTTTTGTGCAGTACTAA   | 20 | 0  | RDR2-resistant |
| GAGGGAGATGGCAGAACAAATGGTG | 0  | 11 | RDR2-sensitive |
| GAGGGATAACTGGGGACAACACGG  | 2  | 41 | RDR2-sensitive |

|                           |    |    |                |
|---------------------------|----|----|----------------|
| GAGGGATCTTCAGTGACCGTCGGA  | 0  | 35 | RDR2-sensitive |
| GAGGGATGAATAAGGCTGCAGCAT  | 0  | 29 | RDR2-sensitive |
| GAGGGCAAGTGAACAGGAGACCAA  | 0  | 10 | RDR2-sensitive |
| GAGGGCAGAACGGCAGAACAGCAG  | 0  | 17 | RDR2-sensitive |
| GAGGGCAGAACTGTACGCGCGCAC  | 0  | 27 | RDR2-sensitive |
| GAGGGCAGCAGTGGCACACAGAAG  | 0  | 9  | RDR2-sensitive |
| GAGGGCCCAGAAGAATAGACGACC  | 2  | 23 | RDR2-sensitive |
| GAGGGCGCTGCGCAGATCGACGTC  | 15 | 0  | RDR2-resistant |
| GAGGGCGCTGTAGGGGGCACCCT   | 0  | 12 | RDR2-sensitive |
| GAGGGCTATTTCCGAGAGCCGGTT  | 0  | 11 | RDR2-sensitive |
| GAGGGCTCGGCAACAGTACATCGG  | 0  | 24 | RDR2-sensitive |
| GAGGGCTCTCGACGCGAAGCCGTT  | 0  | 12 | RDR2-sensitive |
| GAGGGCTCTGGCGATGACGAAGTT  | 0  | 13 | RDR2-sensitive |
| GAGGGCTTCCAGACGCGGAGACGC  | 0  | 13 | RDR2-sensitive |
| GAGGGGAGTGTAGAGAGCGACGTC  | 0  | 19 | RDR2-sensitive |
| GAGGGGCAGCGGCAGCAGAACCAT  | 0  | 10 | RDR2-sensitive |
| GAGGGGCTGTAAAAGGTAGGGTTT  | 1  | 19 | RDR2-sensitive |
| GAGGGGCTGTAAAAGGTGGGGTTT  | 0  | 10 | RDR2-sensitive |
| GAGGGGTCTGCAGGGCGTACCAGA  | 0  | 11 | RDR2-sensitive |
| GAGGGTACCCCTAATTATGGTCCC  | 4  | 22 | RDR2-sensitive |
| GAGGGTAGACAAGGCGCTGACGTA  | 0  | 9  | RDR2-sensitive |
| GAGGGTAGATCTGAGCAAGACGTC  | 0  | 16 | RDR2-sensitive |
| GAGGGTAGATTTGAGCAGAGCGTC  | 0  | 35 | RDR2-sensitive |
| GAGGGTCAAGTAGAGGCGAGTTGA  | 0  | 11 | RDR2-sensitive |
| GAGGGTCATCCTTGTGTGCGGGAC  | 0  | 11 | RDR2-sensitive |
| GAGGGTCGACGATCTGTACGACGG  | 0  | 11 | RDR2-sensitive |
| GAGGGTCGATGACGGGCGAGCGGT  | 0  | 9  | RDR2-sensitive |
| GAGGGTGAGGATGGGTAGAGAGGC  | 0  | 9  | RDR2-sensitive |
| GAGGGTGATGCTCGACGAACGGAC  | 1  | 46 | RDR2-sensitive |
| GAGGGTGCTGTACATATACGACGT  | 0  | 20 | RDR2-sensitive |
| GAGGGTTGCTGACGCTGACGGGAC  | 0  | 9  | RDR2-sensitive |
| GAGGGTTGGCGATCTGTACGACGG  | 0  | 9  | RDR2-sensitive |
| GAGGTAAACGGGCCGTGTGCGGGCT | 0  | 13 | RDR2-sensitive |
| GAGGTAAAGTGTGTGACTGATGGTG | 0  | 9  | RDR2-sensitive |
| GAGGTACCCGTCTGAATAGGCTGC  | 0  | 12 | RDR2-sensitive |
| GAGGTACGTGATGCGTCGGCACAA  | 0  | 27 | RDR2-sensitive |
| GAGGTACTGGACTATAGATGGCAA  | 0  | 14 | RDR2-sensitive |
| GAGGTACTGTAAAAGATGGTGTTT  | 0  | 10 | RDR2-sensitive |
| GAGGTAGAGCAGTGCTGATGACGT  | 10 | 98 | RDR2-sensitive |
| GAGGTAGAGCTAGAGAGGGGACAG  | 0  | 11 | RDR2-sensitive |
| GAGGTAGAGCTGTACGGGCATCAA  | 0  | 22 | RDR2-sensitive |
| GAGGTAGGGCTGGTTGGCGAGCGG  | 0  | 9  | RDR2-sensitive |
| GAGGTAGGTGTAGTTGGGGACGAC  | 3  | 31 | RDR2-sensitive |
| GAGGTAGTACACCTGGTCGTTGCA  | 0  | 50 | RDR2-sensitive |
| GAGGTAGTCGAACTGCGCGAGCAT  | 0  | 19 | RDR2-sensitive |
| GAGGTATCACTTCGGACATGACGG  | 0  | 17 | RDR2-sensitive |
| GAGGTATTGCGCCGAGGACGTCGT  | 1  | 12 | RDR2-sensitive |
| GAGGTATTGTTCTGTTTCTGTCGGA | 42 | 0  | RDR2-resistant |
| GAGGTCAAAGTAGGATGAGGCGGG  | 0  | 11 | RDR2-sensitive |

|                           |     |    |                |
|---------------------------|-----|----|----------------|
| GAGGTCAAAGTAGGATGAGTCGGA  | 1   | 30 | RDR2-sensitive |
| GAGGTCAAAGTAGGATGAGTCGGG  | 0   | 23 | RDR2-sensitive |
| GAGGTCAAAGTAGGATGAGTCGGT  | 0   | 35 | RDR2-sensitive |
| GAGGTCAAGTTGGGTTTGTCTGGGT | 0   | 13 | RDR2-sensitive |
| GAGGTCCACCCATCACCCGTCTGGT | 0   | 10 | RDR2-sensitive |
| GAGGTCCTGTAGCTGGCGGGCGCC  | 219 | 18 | RDR2-resistant |
| GAGGTTCGACGGTTTCAATACTAAC | 63  | 11 | RDR2-resistant |
| GAGGTTCGAGGTAGATGTGGGCTAT | 0   | 14 | RDR2-sensitive |
| GAGGTTCGACGCTCATGGACGGACA | 0   | 12 | RDR2-sensitive |
| GAGGTTCGGCTTCGGGCAAGGCGTA | 0   | 11 | RDR2-sensitive |
| GAGGTTCGGGGCCGAGATTAGACGT | 0   | 10 | RDR2-sensitive |
| GAGGTTCGGGTGCTGAGCAGGCGTA | 0   | 10 | RDR2-sensitive |
| GAGGTTCGGGTGTTGGGCAGGCGTA | 0   | 9  | RDR2-sensitive |
| GAGGTTCGTTGTAGATCCGAGGCTT | 0   | 10 | RDR2-sensitive |
| GAGGTCTATGTAGGATGAGGCGTG  | 0   | 17 | RDR2-sensitive |
| GAGGTCTGACTCTTCTACGTGCAC  | 0   | 11 | RDR2-sensitive |
| GAGGTCTGGTCGCTGGGACAGGCG  | 0   | 13 | RDR2-sensitive |
| GAGGTCTTATTGGAGCGAAGGCGA  | 0   | 12 | RDR2-sensitive |
| GAGGTGACGTAGAGGAGGACCGAC  | 0   | 9  | RDR2-sensitive |
| GAGGTGACTCTGTGGCTATGAAAG  | 0   | 10 | RDR2-sensitive |
| GAGGTGCACTAGAGTAGATATCAT  | 24  | 1  | RDR2-resistant |
| GAGGTGCCCGTCTGAATAGGCTGC  | 1   | 23 | RDR2-sensitive |
| GAGGTGGCTCTGGACGCGGGACGC  | 0   | 29 | RDR2-sensitive |
| GAGGTGTTACAAGGTCGTCGCGTT  | 0   | 12 | RDR2-sensitive |
| GAGGTGTTGCTGATCGGAGGC     | 0   | 34 | RDR2-sensitive |
| GAGGTTAATGTAGACCACAGGCGT  | 0   | 86 | RDR2-sensitive |
| GAGGTACTGGAGGCTGACGGCGT   | 0   | 12 | RDR2-sensitive |
| GAGGTTCGGATGCAGGATCGGATA  | 0   | 19 | RDR2-sensitive |
| GAGGTTCGGCAAGCTCGACGACGA  | 0   | 66 | RDR2-sensitive |
| GAGGTCTGTAGCTTGGTGGTGGGA  | 0   | 9  | RDR2-sensitive |
| GAGGTGACTGATGAGGACGTCGG   | 0   | 22 | RDR2-sensitive |
| GAGGTTCAGGATGGCAGAACGGC   | 0   | 80 | RDR2-sensitive |
| GAGGTGGTCTGTTGCCCGGCAT    | 0   | 15 | RDR2-sensitive |
| GAGGTGGTCTTGGACAAGGCGTG   | 0   | 85 | RDR2-sensitive |
| GAGGTGGTGGAGGCCGGCGAGCT   | 853 | 59 | RDR2-resistant |
| GAGGTGTGTAGCAGTGACGACAT   | 4   | 87 | RDR2-sensitive |
| GAGGTGTGTAGTAGTGACGACAT   | 0   | 56 | RDR2-sensitive |
| GAGGTGTTCTCGGACGAGTCGTG   | 0   | 12 | RDR2-sensitive |
| GAGGTTTGAATTCGAATTGAGGC   | 16  | 0  | RDR2-resistant |
| GAGGTTTTGGAATATGAACCGGT   | 51  | 12 | RDR2-resistant |
| GAGGTTTTGTAATATGAACCGGT   | 22  | 0  | RDR2-resistant |
| GAGTAACTTTGGATAGACTGCTG   | 0   | 40 | RDR2-sensitive |
| GAGTACTCGGCAGACGACAGCGCT  | 0   | 9  | RDR2-sensitive |
| GAGTACTGAGTGACACTCGGCATG  | 0   | 9  | RDR2-sensitive |
| GAGTACTGATCGGTCGGTCAGGTT  | 0   | 9  | RDR2-sensitive |
| GAGTACTGTGTGAATTACGTGTGG  | 0   | 9  | RDR2-sensitive |
| GAGTACTTTTGTCTGGATACTCGGC | 0   | 14 | RDR2-sensitive |
| GAGTAGAATGAGTGCGGATAGCCT  | 0   | 10 | RDR2-sensitive |
| GAGTAGAGCGACGACGCTGCGGCG  | 14  | 0  | RDR2-resistant |

|                            |     |    |                |
|----------------------------|-----|----|----------------|
| GAGTAGATCACTGTGGTGCCTGCA   | 0   | 9  | RDR2-sensitive |
| GAGTAGGACGGTGTCTGTTGACTGT  | 0   | 12 | RDR2-sensitive |
| GAGTAGGACGGTGTCAACGACTGT   | 3   | 38 | RDR2-sensitive |
| GAGTAGGACGGTGTTCATAGATCAT  | 0   | 36 | RDR2-sensitive |
| GAGTAGGACGGTGTGACAACTGT    | 0   | 9  | RDR2-sensitive |
| GAGTAGGACGGTGTGACGACTGT    | 0   | 38 | RDR2-sensitive |
| GAGTAGGACGGTGTGCGCCGACTGT  | 2   | 16 | RDR2-sensitive |
| GAGTAGGACTTTGCCGAGCGCGGC   | 1   | 13 | RDR2-sensitive |
| GAGTAGGCTCGGGCCCAAGCGGCT   | 0   | 16 | RDR2-sensitive |
| GAGTAGGGCTCGTGCTGAGATCGC   | 7   | 39 | RDR2-sensitive |
| GAGTAGTAGGACTAGCAGATGAT    | 0   | 9  | RDR2-sensitive |
| GAGTAGTGAAGCGGGCTGGGCA     | 283 | 47 | RDR2-resistant |
| GAGTATCGTGTGGATTGAGTGC GG  | 0   | 10 | RDR2-sensitive |
| GAGTATGTTGATGGGCAGGAACCT   | 1   | 19 | RDR2-sensitive |
| GAGTATTTCTGATCGTTGGATCAA   | 0   | 9  | RDR2-sensitive |
| GAGTATTTTTTGGTCTGTGCTGGAC  | 0   | 15 | RDR2-sensitive |
| GAGTCAAGACGGGATGGGACAGGA   | 0   | 21 | RDR2-sensitive |
| GAGTCAAGGCTGAGACGGGACCAT   | 0   | 17 | RDR2-sensitive |
| GAGTCAATCTGATCGCAGGGGCGC   | 0   | 11 | RDR2-sensitive |
| GAGTCACGGGCGAGAAGAGGACGA   | 0   | 10 | RDR2-sensitive |
| GAGTCCGATGGCATACTGGCGAAG   | 0   | 12 | RDR2-sensitive |
| GAGTCCGCGTGCTTAGACGGTCTG   | 0   | 12 | RDR2-sensitive |
| GAGTCCTGTAGGAGCACAGCTGGC   | 0   | 13 | RDR2-sensitive |
| GAGTCGGCTTGAGCTCGGAGCGGC   | 0   | 13 | RDR2-sensitive |
| GAGTCGGTAGAGCGCGGCGCGCAC   | 0   | 9  | RDR2-sensitive |
| GAGTCGTAGATCTTTGGTGGACGG   | 0   | 9  | RDR2-sensitive |
| GAGTCTGTATCTCGGATTTGCGGC   | 0   | 27 | RDR2-sensitive |
| GAGTCTTAAATTCCGGCTCGTCCG   | 0   | 69 | RDR2-sensitive |
| GAGTCTTCTTCACTACATCGTCCG   | 0   | 11 | RDR2-sensitive |
| GAGTCTTTTCGGGCTTGAGCCGGA   | 0   | 14 | RDR2-sensitive |
| GAGTGAACCTCAGAGACGCACCAA   | 0   | 10 | RDR2-sensitive |
| GAGTGAACCTGGAACAGAGCGGCTC  | 5   | 36 | RDR2-sensitive |
| GAGTGAACCTGGAACAGAGCGGCTT  | 0   | 14 | RDR2-sensitive |
| GAGTGAAGTAGAACGGATCGGCTC   | 0   | 11 | RDR2-sensitive |
| GAGTGAACCTGAGTGGCAGCTC     | 0   | 14 | RDR2-sensitive |
| GAGTGAACCTGAGTGTGAGTGGGCTG | 0   | 10 | RDR2-sensitive |
| GAGTGAGGACAAAGTGCGCACAAA   | 2   | 35 | RDR2-sensitive |
| GAGTGAGTGTGCTGCGTGCCCCAG   | 0   | 19 | RDR2-sensitive |
| GAGTGATGGTTTGCCGGACAACAG   | 0   | 14 | RDR2-sensitive |
| GAGTGCAACCTCGTTCGTTGGAA    | 0   | 12 | RDR2-sensitive |
| GAGTGCAGGACTTTGCCGAGGACG   | 0   | 11 | RDR2-sensitive |
| GAGTGCCCTCTGACGGGAAGTCGG   | 0   | 15 | RDR2-sensitive |
| GAGTGCGCGGACTGTCCGGCCATG   | 0   | 9  | RDR2-sensitive |
| GAGTGCGGCACTCGGCAAAGCCTT   | 0   | 11 | RDR2-sensitive |
| GAGTGCTGGGGTACAACAGACGAC   | 0   | 9  | RDR2-sensitive |
| GAGTGCTGTGAATGGAACGGACAT   | 0   | 9  | RDR2-sensitive |
| GAGTGCTGTGTGAACGAGCCGGTT   | 0   | 11 | RDR2-sensitive |
| GAGTGGAAGACTGATTGACCGGGC   | 0   | 9  | RDR2-sensitive |
| GAGTGACGAAGAGTGATGGCCTG    | 0   | 9  | RDR2-sensitive |

|                           |     |    |                |
|---------------------------|-----|----|----------------|
| GAGTGGACGGTCTGCTGCTCATGC  | 0   | 9  | RDR2-sensitive |
| GAGTGGACGGTGCAGATTGGCTGA  | 1   | 12 | RDR2-sensitive |
| GAGTGGAGACTGGGACACACGGAT  | 0   | 13 | RDR2-sensitive |
| GAGTGGAGTGATAGAGGACGCTAC  | 0   | 9  | RDR2-sensitive |
| GAGTGGAGTTAGAACGGCCTTGGA  | 0   | 24 | RDR2-sensitive |
| GAGTGGATGATGGACGAGATGTGC  | 0   | 23 | RDR2-sensitive |
| GAGTGGATTGAGGTGGTATAAGGT  | 0   | 9  | RDR2-sensitive |
| GAGTGGGAGAGGCTCTGCACGGAC  | 1   | 17 | RDR2-sensitive |
| GAGTGGGAGATGCTCTGCACGGAC  | 0   | 10 | RDR2-sensitive |
| GAGTGGGCAGAACGGCAGAACGGC  | 0   | 11 | RDR2-sensitive |
| GAGTGGTCTGTGGTCCGAGAGGCT  | 0   | 16 | RDR2-sensitive |
| GAGTGTAGCACTCGGCAAAGAGAG  | 0   | 11 | RDR2-sensitive |
| GAGTGTACAGACGGTCCGAGCCATT | 0   | 10 | RDR2-sensitive |
| GAGTGTCTACAGGTATTCGGCCA   | 0   | 9  | RDR2-sensitive |
| GAGTGTCTTAGACCTGGACCCGGC  | 0   | 9  | RDR2-sensitive |
| GAGTGTGACTCTCGGGCTCTCGGC  | 0   | 13 | RDR2-sensitive |
| GAGTGTGAGATTGGGCCATCTGTG  | 34  | 0  | RDR2-resistant |
| GAGTGTGCTGCGTGCCCCAGCCCA  | 0   | 11 | RDR2-sensitive |
| GAGTGTGGAACTCGGCAAAGACTG  | 0   | 9  | RDR2-sensitive |
| GAGTGTGGCACTCGACAAAGACGT  | 0   | 28 | RDR2-sensitive |
| GAGTGTGGGTCTTGACTGACGGA   | 2   | 14 | RDR2-sensitive |
| GAGTTAATCTGATCGGAGGGGCGC  | 0   | 17 | RDR2-sensitive |
| GAGTTACGGACAAGCGGATGCTGC  | 0   | 13 | RDR2-sensitive |
| GAGTTAGGGTTAGAGAACGGCGTC  | 0   | 12 | RDR2-sensitive |
| GAGTTATCCTGGACTTGTCGGCGT  | 0   | 12 | RDR2-sensitive |
| GAGTTATCGTGGACTTGTCGGCGT  | 0   | 17 | RDR2-sensitive |
| GAGTTCTAGTCGACTGGACGGGTT  | 0   | 15 | RDR2-sensitive |
| GAGTTCTGATGGGATCCGGTGCTT  | 155 | 27 | RDR2-resistant |
| GAGTTGATCTGATCGGGAGGCCGC  | 0   | 13 | RDR2-sensitive |
| GAGTTGCATACGCCAGGTCGTCAG  | 0   | 9  | RDR2-sensitive |
| GAGTTGCGGATGGTCGGATGGCGT  | 0   | 10 | RDR2-sensitive |
| GAGTTGGATCTGTTGGTGTGGTGT  | 0   | 14 | RDR2-sensitive |
| GAGTTGGGACTGTGCGAACGGCGC  | 0   | 19 | RDR2-sensitive |
| GAGTTGGGTGAAGTCGGAGGCTAA  | 0   | 10 | RDR2-sensitive |
| GAGTTGTGGGCGATGATTGGCAGC  | 14  | 0  | RDR2-resistant |
| GAGTTTCCCGTCGGTCTGGGCAT   | 0   | 10 | RDR2-sensitive |
| GAGTTTCGTTGATTGTTGTGCGACA | 36  | 1  | RDR2-resistant |
| GAGTTTGTGAGGTTGATATCGGAT  | 59  | 0  | RDR2-resistant |
| GATAAAATCGGGTCGGGTACGGGT  | 1   | 12 | RDR2-sensitive |
| GATAAACTGGGCTGTAAGGCGGAC  | 0   | 9  | RDR2-sensitive |
| GATAAATGGGTCTGGCTCGACGGCG | 0   | 70 | RDR2-sensitive |
| GATAAATTCGGGTCTGGGTACGGGT | 0   | 9  | RDR2-sensitive |
| GATAACAGACGTGGGACAGGTGGC  | 0   | 29 | RDR2-sensitive |
| GATAACGGTGGAATCGACGACGC   | 0   | 17 | RDR2-sensitive |
| GATAACTCGGACGCGAGAGCGCAT  | 0   | 9  | RDR2-sensitive |
| GATAAGAATGGGACTGGGCCATAG  | 0   | 9  | RDR2-sensitive |
| GATAAGACTGCCGTCTGGACATA   | 0   | 18 | RDR2-sensitive |
| GATAAGACTGGAGTAGAGGCCGAA  | 0   | 15 | RDR2-sensitive |
| GATAAGTTTAGATCGTGCCGACGG  | 48  | 5  | RDR2-resistant |



|                           |     |     |                |
|---------------------------|-----|-----|----------------|
| GATAATAACGGACAGGGGAGGGCA  | 0   | 17  | RDR2-sensitive |
| GATAATCTGGAACGGAGCGGCTCT  | 0   | 17  | RDR2-sensitive |
| GATAATGGCATACTGGTGGGACCG  | 0   | 20  | RDR2-sensitive |
| GATACAACGAGACTGCGGACGAGC  | 0   | 14  | RDR2-sensitive |
| GATACACAGGGACAAGAACGGGAA  | 0   | 9   | RDR2-sensitive |
| GATACAGATTGTTTTAACATGGCT  | 17  | 0   | RDR2-resistant |
| GATACCAGCTGTGACGGAACCTCC  | 0   | 51  | RDR2-sensitive |
| GATACGACGGACGTATGGATGGCC  | 0   | 9   | RDR2-sensitive |
| GATACGCAGCAGACGACACTCTAG  | 0   | 11  | RDR2-sensitive |
| GATACGGACAGTAGCGATGACGGG  | 2   | 40  | RDR2-sensitive |
| GATACGGACCATTGGGGCGGCTGG  | 0   | 9   | RDR2-sensitive |
| GATACGGACGGTACCGATTGACGG  | 0   | 13  | RDR2-sensitive |
| GATACGGGTAGGATACGGAATCAC  | 0   | 13  | RDR2-sensitive |
| GATACGGTCATACGGCGAACAGAA  | 0   | 10  | RDR2-sensitive |
| GATACGGTCCGTTGGAGAGGGCGAT | 0   | 11  | RDR2-sensitive |
| GATACGGTCCGTTGGCGAGGGCGAT | 0   | 12  | RDR2-sensitive |
| GATACGGTCCGTTGGTAAGGGCGAT | 2   | 34  | RDR2-sensitive |
| GATACGGTCCGTTGGTGAGGGCGAT | 1   | 18  | RDR2-sensitive |
| GATACGTATGGTCTGTTGGTGGCT  | 0   | 20  | RDR2-sensitive |
| GATACGTCCGTAGTTCGTCTCGTCA | 0   | 9   | RDR2-sensitive |
| GATACTATGGGCTGAGCTGGTGGC  | 1   | 16  | RDR2-sensitive |
| GATACTGAACCGTGGCTTGGACGA  | 0   | 58  | RDR2-sensitive |
| GATACTGTAGCCCCTAAACGGTGA  | 0   | 13  | RDR2-sensitive |
| GATAGAATGGACGGCTGAGATCGC  | 1   | 26  | RDR2-sensitive |
| GATAGACATGTCGGAACAGGTCCG  | 0   | 11  | RDR2-sensitive |
| GATAGACCGGACAGGCCCTTGGGC  | 19  | 0   | RDR2-resistant |
| GATAGACGGGGACGAGAGAGATGG  | 73  | 1   | RDR2-resistant |
| GATAGACTGAGGAGAGGAGGATGG  | 0   | 9   | RDR2-sensitive |
| GATAGACTGTAACCTCGCTGACGG  | 0   | 10  | RDR2-sensitive |
| GATAGAGGACTGAATGGAGGCGAC  | 0   | 16  | RDR2-sensitive |
| GATAGAGGACTGGAGGGAGGCCGGG | 0   | 10  | RDR2-sensitive |
| GATAGAGGACTGGATGGAGACGAC  | 0   | 9   | RDR2-sensitive |
| GATAGAGGATGGCGAGCAGGACGT  | 0   | 17  | RDR2-sensitive |
| GATAGATCATCGGGATCGACGGGC  | 0   | 32  | RDR2-sensitive |
| GATAGATGGTAGAACGGCAGGCTA  | 0   | 69  | RDR2-sensitive |
| GATAGCAGGACTCTCGGCACAGAA  | 0   | 10  | RDR2-sensitive |
| GATAGCGGTGTAGTGAGACGACGT  | 14  | 258 | RDR2-sensitive |
| GATAGCTCGGACAGGGAGGCGAGG  | 0   | 10  | RDR2-sensitive |
| GATAGCTTTGGCCGTCCGAAGTTA  | 0   | 11  | RDR2-sensitive |
| GATAGGACACCTGATCACGGTCAC  | 0   | 30  | RDR2-sensitive |
| GATAGGACGGGACGAGATGAGACG  | 0   | 15  | RDR2-sensitive |
| GATAGGACGGTATCGCCGGTGCTC  | 0   | 28  | RDR2-sensitive |
| GATAGGCAGGCGAGAGCGGGGCGA  | 0   | 13  | RDR2-sensitive |
| GATAGGGGCATTTCGAGGCCGATTA | 44  | 0   | RDR2-resistant |
| GATAGGGTACTGCCGACGGACATT  | 0   | 12  | RDR2-sensitive |
| GATAGGTCTGGACCGTGCCGGCAC  | 0   | 33  | RDR2-sensitive |
| GATAGGTTAATGCCGTCCGGACATA | 1   | 22  | RDR2-sensitive |
| GATAGTCGTAGAGTAGCGTCCGGCG | 122 | 0   | RDR2-resistant |
| GATAGTGAAGACGACGTGGAGCAT  | 0   | 28  | RDR2-sensitive |

|                           |     |    |                |
|---------------------------|-----|----|----------------|
| GATAGTGACCAGAGCCGGACGGCC  | 89  | 0  | RDR2-resistant |
| GATAGTTGTATGGACGGTGTCCGA  | 0   | 11 | RDR2-sensitive |
| GATAGTTGTGGGACCGAATCGGTG  | 1   | 15 | RDR2-sensitive |
| GATATAGAGGACGTTGCTGGAGAC  | 0   | 25 | RDR2-sensitive |
| GATATAGGGCTGGACGGTTCACGA  | 0   | 9  | RDR2-sensitive |
| GATATAGTTGGTGGACGGAGGCAG  | 0   | 9  | RDR2-sensitive |
| GATATATGAGTCGGCACGACGGTG  | 0   | 37 | RDR2-sensitive |
| GATATATGGGTCCGGCACGACGGTA | 0   | 15 | RDR2-sensitive |
| GATATATGGGTTGGCACGACGGCG  | 0   | 9  | RDR2-sensitive |
| GATATCAGGACTCGACGGCAGCGC  | 0   | 10 | RDR2-sensitive |
| GATATCCAGTCGGCCAGGGCGCGC  | 0   | 13 | RDR2-sensitive |
| GATATCCTCGTAGGACGGGACGCC  | 0   | 10 | RDR2-sensitive |
| GATATCGGAGGAGAGGGCATTAC   | 0   | 11 | RDR2-sensitive |
| GATATCGGGCAGGAGTAGTGGGCA  | 0   | 21 | RDR2-sensitive |
| GATATCTGATTACAGTTGACTAA   | 0   | 9  | RDR2-sensitive |
| GATATCTGATTACGATTGACTAA   | 0   | 9  | RDR2-sensitive |
| GATATGAAGGCGGGTATGGAACGA  | 0   | 14 | RDR2-sensitive |
| GATATGACACGGCGATATATGGAT  | 15  | 0  | RDR2-resistant |
| GATATGACACGGCGATGTATGGAT  | 14  | 0  | RDR2-resistant |
| GATATGAGCTGTGGAATGCGGATA  | 0   | 51 | RDR2-sensitive |
| GATATGCAGCCTGACTGAGCGGAT  | 0   | 9  | RDR2-sensitive |
| GATATGGACCCGGCTGAAAGACGT  | 5   | 85 | RDR2-sensitive |
| GATATGGCATCGGACGGCTGGCTT  | 0   | 9  | RDR2-sensitive |
| GATATGGGCAATAGGAACGGACGG  | 0   | 9  | RDR2-sensitive |
| GATATGGTTGAAGCTCGACGGTAT  | 0   | 16 | RDR2-sensitive |
| GATATTATTTGATCGGATATCGGA  | 2   | 37 | RDR2-sensitive |
| GATATTCGGGTCGGATACGGATAC  | 0   | 9  | RDR2-sensitive |
| GATATTGCATAGCACGGTCCGGTAG | 0   | 9  | RDR2-sensitive |
| GATATTGTTTGTGGGTTATTGGCT  | 14  | 0  | RDR2-resistant |
| GATATTGTTTTACATCACAGTCGG  | 0   | 25 | RDR2-sensitive |
| GATATTTCTGCGGAATCGTCGTT   | 64  | 0  | RDR2-resistant |
| GATATTTTTCGGATTATGTTTGA   | 21  | 0  | RDR2-resistant |
| GATCAATGTTGACTGTCGCGTGC   | 81  | 3  | RDR2-resistant |
| GATCAATTGATTGATTGTAGCGAT  | 175 | 8  | RDR2-resistant |
| GATCACATCGGTTCTCTTAGGCAT  | 0   | 13 | RDR2-sensitive |
| GATCACATCTTGGCCGGTCGTCCA  | 0   | 19 | RDR2-sensitive |
| GATCACTATCATTGTCGGGACAGT  | 14  | 0  | RDR2-resistant |
| GATCACTCTGGACCATGCCGTGCT  | 0   | 14 | RDR2-sensitive |
| GATCACTTGGGTCGTACGACGTAT  | 0   | 10 | RDR2-sensitive |
| GATCAGACCAGGACGCGATATCAG  | 0   | 9  | RDR2-sensitive |
| GATCAGACTGTCCACATGGAGGCG  | 1   | 15 | RDR2-sensitive |
| GATCAGAGTGGACTGGGCACGCAC  | 0   | 13 | RDR2-sensitive |
| GATCAGATTAACCTCGGACGATCGT | 0   | 9  | RDR2-sensitive |
| GATCAGCATTGGCGTCGTGACGGT  | 21  | 1  | RDR2-resistant |
| GATCAGGCTACGTAGAGGGAGCGG  | 0   | 12 | RDR2-sensitive |
| GATCAGGGGCGCGGTTAGACGGTT  | 2   | 15 | RDR2-sensitive |
| GATCAGGTTTCTGGAGAGCGTCTG  | 0   | 16 | RDR2-sensitive |
| GATCAGTGACGTGGACACGGTTAG  | 20  | 1  | RDR2-resistant |
| GATCATGGCTAGACTGGAGGCGAC  | 2   | 36 | RDR2-sensitive |

|                           |    |    |                |
|---------------------------|----|----|----------------|
| GATCATGTGGAAGACGACTGACAT  | 1  | 36 | RDR2-sensitive |
| GATCATGTTGGACGGGCCGAGCGG  | 0  | 13 | RDR2-sensitive |
| GATCCAAAGTCGGGCGGGGCACGG  | 0  | 9  | RDR2-sensitive |
| GATCCAGCAGCAACGTCGAGGTAG  | 0  | 9  | RDR2-sensitive |
| GATCCAGTTCTTCGTCGTCGGTGC  | 0  | 14 | RDR2-sensitive |
| GATCCATATTATTCGTGTCGGGC   | 0  | 14 | RDR2-sensitive |
| GATCCATCTTGGACCTGTGACGGT  | 0  | 9  | RDR2-sensitive |
| GATCCCGAGCCACTGTAGCAGCAT  | 0  | 14 | RDR2-sensitive |
| GATCCCTTGGGTCGGTAGCTTGCA  | 22 | 0  | RDR2-resistant |
| GATCCGACCTGAGGACCGGACGGT  | 0  | 11 | RDR2-sensitive |
| GATCCGCGACGAATTCGGCAACCA  | 0  | 12 | RDR2-sensitive |
| GATCCGCGATCTAGGGACGGACGG  | 0  | 19 | RDR2-sensitive |
| GATCCGCGGCATAGGACTGGACGG  | 0  | 18 | RDR2-sensitive |
| GATCCGCGGCTCAGGGATGGACGG  | 0  | 11 | RDR2-sensitive |
| GATCCGCGGGAGGTAGGGGCGAGC  | 0  | 16 | RDR2-sensitive |
| GATCCGGACCAAGTCTGAAAAGGC  | 0  | 9  | RDR2-sensitive |
| GATCCGGACCCGTATAGAATCGGA  | 0  | 12 | RDR2-sensitive |
| GATCCGGACTTGCTTGGAGGCGTC  | 0  | 10 | RDR2-sensitive |
| GATCCGGAGGATAGAAGACTGGGA  | 0  | 10 | RDR2-sensitive |
| GATCCGGAGTCATGTGGACGGAGT  | 0  | 12 | RDR2-sensitive |
| GATCCGGATCTGCTTGGAGGCGTC  | 4  | 57 | RDR2-sensitive |
| GATCCGGCACGGATTAGAACCGGC  | 0  | 13 | RDR2-sensitive |
| GATCCGGGCGGAAGACATTGTCAG  | 6  | 25 | RDR2-sensitive |
| GATCCGGTTCGGCTGGCGAGGCGAT | 1  | 17 | RDR2-sensitive |
| GATCCGTTCGACGGCTGGCACAGGC | 0  | 17 | RDR2-sensitive |
| GATCCGTGTCTAGGGCTTGGACGG  | 0  | 17 | RDR2-sensitive |
| GATCCGTTGGACATGGCATGGCCT  | 48 | 0  | RDR2-resistant |
| GATCCTACGGACGAGGTCTCGGAT  | 0  | 19 | RDR2-sensitive |
| GATCCTACGTCGTGAAGATCGGGC  | 0  | 33 | RDR2-sensitive |
| GATCCTCTGCGTCAGACACGGACC  | 3  | 55 | RDR2-sensitive |
| GATCCTGACGGAAGACGACACCAT  | 0  | 15 | RDR2-sensitive |
| GATCCTGCGATTTGGTCGGTCGGT  | 2  | 18 | RDR2-sensitive |
| GATCCTGTTAGTGGCCTCGTCGGA  | 1  | 13 | RDR2-sensitive |
| GATCCTTTTGGATTGTTGGTTTCGT | 67 | 1  | RDR2-resistant |
| GATCGAACGATCGGACGAACGGAC  | 0  | 19 | RDR2-sensitive |
| GATCGAACTGGGACTAGAGGACGA  | 0  | 25 | RDR2-sensitive |
| GATCGAAGCGGAGGCAGAACGGGT  | 0  | 12 | RDR2-sensitive |
| GATCGAATAGTAGAATAGAGCGGA  | 0  | 25 | RDR2-sensitive |
| GATCGACTGCTCTGTCCAAGACGT  | 0  | 12 | RDR2-sensitive |
| GATCGAGTCACTCGTGTGGACTGA  | 0  | 14 | RDR2-sensitive |
| GATCGAGTCGCTCGAATGGACTGA  | 0  | 17 | RDR2-sensitive |
| GATCGAGTCGCTCGTATGGACTGA  | 1  | 18 | RDR2-sensitive |
| GATCGATATCAGGACTCGACGGCA  | 1  | 28 | RDR2-sensitive |
| GATCGATATCGGGACTCGACGGCA  | 0  | 12 | RDR2-sensitive |
| GATCGATGACTGGACACACGGCAC  | 0  | 13 | RDR2-sensitive |
| GATCGATGCCCTGAGCTCAGACGG  | 0  | 25 | RDR2-sensitive |
| GATCGCCGTTCGGATATAAGACGAC | 1  | 17 | RDR2-sensitive |
| GATCGCGTCTTAGCCGGTCGTCGA  | 0  | 22 | RDR2-sensitive |
| GATCGGAAACACAGGTGTCGGCGT  | 0  | 10 | RDR2-sensitive |

|                           |    |    |                |
|---------------------------|----|----|----------------|
| GATCGGAATGAGGGGATGACGGAT  | 0  | 13 | RDR2-sensitive |
| GATCGGAATTCGACCTAGGACGAT  | 0  | 11 | RDR2-sensitive |
| GATCGGACAGTACTGCAAGACGCT  | 0  | 9  | RDR2-sensitive |
| GATCGGACGGTCCACGATGGCGTA  | 0  | 15 | RDR2-sensitive |
| GATCGGATACGCATGGAAACGGAT  | 0  | 24 | RDR2-sensitive |
| GATCGGATCAAACCAGGCTACCAA  | 0  | 12 | RDR2-sensitive |
| GATCGGATCAGTCGGCAACGGTAT  | 0  | 13 | RDR2-sensitive |
| GATCGGATGCACGGCTACCTGCGC  | 0  | 37 | RDR2-sensitive |
| GATCGGATTCACCGGTAACGGTAT  | 3  | 48 | RDR2-sensitive |
| GATCGGATTCATCGGTAACGGTAT  | 5  | 58 | RDR2-sensitive |
| GATCGGCACATGTAGGGATGGCAA  | 0  | 9  | RDR2-sensitive |
| GATCGGCACCAGACGAAGACCGGC  | 3  | 21 | RDR2-sensitive |
| GATCGGGATCTGTTGTTTCGTCGGG | 0  | 11 | RDR2-sensitive |
| GATCGGGCGAGCGGTTGTTTGGCG  | 0  | 23 | RDR2-sensitive |
| GATCGGGCTACAGGCACGGCACGT  | 0  | 13 | RDR2-sensitive |
| GATCGGGCTGGCCCACGTGCCTAG  | 0  | 11 | RDR2-sensitive |
| GATCGGGTCTGAACTGGAGCCGTC  | 1  | 25 | RDR2-sensitive |
| GATCGGGTGCTGGACACAGGGCAT  | 0  | 18 | RDR2-sensitive |
| GATCGGGTTGTGCCAGCGCAGCAT  | 0  | 15 | RDR2-sensitive |
| GATCGGTAGGCTCCAGCATGATGC  | 0  | 15 | RDR2-sensitive |
| GATCGGTCTGTGGTTGTATGGTAC  | 0  | 18 | RDR2-sensitive |
| GATCGGTTACGGGCTCGGGCCGGC  | 0  | 14 | RDR2-sensitive |
| GATCGTAGATACACGTCCGGCGCTT | 0  | 9  | RDR2-sensitive |
| GATCGTCTTATCCTTCGTCGTGAT  | 0  | 11 | RDR2-sensitive |
| GATCGTTGTCGGGCCTAGGCCGGC  | 0  | 39 | RDR2-sensitive |
| GATCTAACCGTTGATCTGTCAGAA  | 0  | 9  | RDR2-sensitive |
| GATCTAACTTGTCGGACGGGCCGG  | 0  | 13 | RDR2-sensitive |
| GATCTAATCTCGGGACACGCGGAC  | 1  | 23 | RDR2-sensitive |
| GATCTACGGGCGGGGAATCGCGGC  | 0  | 11 | RDR2-sensitive |
| GATCTACTGGACGACGAGCGCACT  | 0  | 12 | RDR2-sensitive |
| GATCTAGAACGGGCTCGACGAGAG  | 0  | 9  | RDR2-sensitive |
| GATCTAGCTTGTCGGGCGGAGGTT  | 0  | 9  | RDR2-sensitive |
| GATCTATATACCTTGCTGTGAGAC  | 32 | 1  | RDR2-resistant |
| GATCTATGACGTCGAGACGAGCGC  | 0  | 9  | RDR2-sensitive |
| GATCTCCGGTGATCTCTGCGACGG  | 0  | 39 | RDR2-sensitive |
| GATCTCGTCGTCAAGCTGAAGGCC  | 0  | 12 | RDR2-sensitive |
| GATCTCTCGACGGCTACGTGACAC  | 1  | 12 | RDR2-sensitive |
| GATCTCTGACGGGCTGGTGCTGGC  | 3  | 64 | RDR2-sensitive |
| GATCTCTGCGACGGCACGGACGGT  | 0  | 16 | RDR2-sensitive |
| GATCTCTGCGAGGACGAGAACGGT  | 0  | 19 | RDR2-sensitive |
| GATCTCTGTATTATGAGGGGGTGT  | 0  | 11 | RDR2-sensitive |
| GATCTGAACGCATGGATGTGTGTA  | 0  | 9  | RDR2-sensitive |
| GATCTGAAGCCGGGTCTGAGCCAG  | 0  | 9  | RDR2-sensitive |
| GATCTGAAGTCGGGCGGGCACGGA  | 0  | 14 | RDR2-sensitive |
| GATCTGACCTTGCTCGGGCGGTAT  | 0  | 19 | RDR2-sensitive |
| GATCTGATCCACTGTATCGTGCTA  | 1  | 12 | RDR2-sensitive |
| GATCTGATCTAGGTGGCGTCTCCC  | 0  | 10 | RDR2-sensitive |
| GATCTGATCTAGGTGGCGTTTCTC  | 2  | 42 | RDR2-sensitive |
| GATCTGATCTATTCGCGGACCATC  | 0  | 10 | RDR2-sensitive |

|                           |    |     |                |
|---------------------------|----|-----|----------------|
| GATCTGATCTCGCAGCAACGTCGA  | 0  | 19  | RDR2-sensitive |
| GATCTGCGACGCAGGATCGGACGT  | 0  | 12  | RDR2-sensitive |
| GATCTGGAACAGGCTCGACGAGAG  | 0  | 12  | RDR2-sensitive |
| GATCTGGACCCGAAGCTCGGCGTC  | 0  | 11  | RDR2-sensitive |
| GATCTGGACCCGCATAGAACCGGA  | 0  | 48  | RDR2-sensitive |
| GATCTGGACGCAGGAGCGACGCCT  | 0  | 24  | RDR2-sensitive |
| GATCTGGATTGACGTGGCACGTAC  | 1  | 19  | RDR2-sensitive |
| GATCTGGCAATCGGACGGTCGAGA  | 0  | 11  | RDR2-sensitive |
| GATCTGGCACAGTAGCGGCTCCTC  | 0  | 15  | RDR2-sensitive |
| GATCTGGCATCGGACGGCTGGCTT  | 0  | 15  | RDR2-sensitive |
| GATCTGGTGGCGGGTCTCGCGGC   | 0  | 12  | RDR2-sensitive |
| GATCTGGTTGGGCTTGGTCGGTAA  | 0  | 10  | RDR2-sensitive |
| GATCTGTAGCGCCGAGCTAGACGC  | 0  | 9   | RDR2-sensitive |
| GATCTGTAGTTTATAATCGGACGG  | 0  | 12  | RDR2-sensitive |
| GATCTGTCATCGGACGACGCACAG  | 0  | 25  | RDR2-sensitive |
| GATCTGTGCGCTCTGGGCCGGTAA  | 0  | 9   | RDR2-sensitive |
| GATCTGTGTTTTCTGTTGGCATT   | 39 | 6   | RDR2-resistant |
| GATCTGTCTTGTGCGGTCTGTCSA  | 0  | 12  | RDR2-sensitive |
| GATCTGTGGAATACAAACAACGGT  | 0  | 11  | RDR2-sensitive |
| GATCTGTGGAATACAAATAACGGT  | 0  | 12  | RDR2-sensitive |
| GATCTGTGTCTGAATAGGTGTGCT  | 60 | 11  | RDR2-resistant |
| GATCTGTTACGTCAATCTGCTGGT  | 15 | 0   | RDR2-resistant |
| GATCTTAGGTGGACTGGACAGCAT  | 0  | 16  | RDR2-sensitive |
| GATCTTCGTCGGTGTAGCGAGGCG  | 0  | 18  | RDR2-sensitive |
| GATCTTCTGACATCGTCGACCCAG  | 3  | 25  | RDR2-sensitive |
| GATCTTCTTTGTGGGTCGTGCGGA  | 1  | 31  | RDR2-sensitive |
| GATCTTGCATGACTGTTGGGTATA  | 15 | 0   | RDR2-resistant |
| GATCTTGCCTTCTGTCGTCGGGCG  | 0  | 11  | RDR2-sensitive |
| GATCTTTGTTGCGGCTGGCTGGCTG | 0  | 10  | RDR2-sensitive |
| GATGAAAACGGTCGGAAACGGTAT  | 0  | 17  | RDR2-sensitive |
| GATGAACCACGTGACGGTACTCTC  | 0  | 11  | RDR2-sensitive |
| GATGAACGCGTGGAAAGAGGCACTG | 0  | 12  | RDR2-sensitive |
| GATGAACGGTGCAGATTGGCTGAA  | 0  | 13  | RDR2-sensitive |
| GATGAACTGGCACGAGCACGACAC  | 0  | 17  | RDR2-sensitive |
| GATGAACTGTAGTGTGTTGGCT    | 1  | 21  | RDR2-sensitive |
| GATGAACTGTTGAACTGCGGATC   | 0  | 9   | RDR2-sensitive |
| GATGAAGACCGGCGACGAAGGCAT  | 0  | 12  | RDR2-sensitive |
| GATGAAGACTGACACGACGCCGAC  | 0  | 13  | RDR2-sensitive |
| GATGAAGCGGTGCTGTAGACGGT   | 1  | 13  | RDR2-sensitive |
| GATGAAGGACTGCCACACGCGCGC  | 8  | 218 | RDR2-sensitive |
| GATGAAGGACTGCCACACGCGCGT  | 0  | 52  | RDR2-sensitive |
| GATGAAGGACTGCCACACGTGCGT  | 0  | 9   | RDR2-sensitive |
| GATGAAGGACTGCCACATGCGGAC  | 0  | 11  | RDR2-sensitive |
| GATGAAGGACTGCCACGCGCGCGC  | 0  | 12  | RDR2-sensitive |
| GATGAAGGCGCTGTGGAGAAGACG  | 0  | 10  | RDR2-sensitive |
| GATGAATAGTGTGCTAGACTCCGC  | 0  | 12  | RDR2-sensitive |
| GATGACAACGGCAGCGACTCGGAC  | 1  | 12  | RDR2-sensitive |
| GATGACACACGGAATGACGACGAG  | 0  | 12  | RDR2-sensitive |
| GATGACACGCGGAACGACGATGAG  | 1  | 28  | RDR2-sensitive |

|                           |     |     |                |
|---------------------------|-----|-----|----------------|
| GATGACAGACTGATGTGGCACCAA  | 0   | 38  | RDR2-sensitive |
| GATGACAGAGCAACGTTGGACGGA  | 0   | 12  | RDR2-sensitive |
| GATGACAGTGAGGCTCGACGGCGA  | 0   | 9   | RDR2-sensitive |
| GATGACATGGTAGAACACGTCGGA  | 0   | 13  | RDR2-sensitive |
| GATGACCAGCTGTAGAGGACACAC  | 1   | 21  | RDR2-sensitive |
| GATGACCAGGGAACCTCAGCACGGA | 0   | 42  | RDR2-sensitive |
| GATGACCGACATGTAGGGGGCGCT  | 0   | 10  | RDR2-sensitive |
| GATGACCGTTTGAAGCCGTCGGAT  | 0   | 15  | RDR2-sensitive |
| GATGACCTGTGACTGGCAAACAAC  | 0   | 14  | RDR2-sensitive |
| GATGACGAACCTTGGACGATGGCAA | 0   | 9   | RDR2-sensitive |
| GATGACGCACGGAACGACGACGAC  | 0   | 43  | RDR2-sensitive |
| GATGACGCACGGAACGACGACGAG  | 1   | 24  | RDR2-sensitive |
| GATGACGCACGGAATGACGACGAG  | 1   | 20  | RDR2-sensitive |
| GATGACGCACGGATCGACGACGAC  | 2   | 25  | RDR2-sensitive |
| GATGACGCATGGTACGACGACGAG  | 0   | 10  | RDR2-sensitive |
| GATGACGCGCGGAACGACGACGAC  | 0   | 12  | RDR2-sensitive |
| GATGACGCGCGGAACGACGACGAG  | 0   | 11  | RDR2-sensitive |
| GATGACGCGCGGAATGACGACAAG  | 1   | 20  | RDR2-sensitive |
| GATGACGGGCTGCGGGATACCAAA  | 0   | 11  | RDR2-sensitive |
| GATGACGTCATATTAGACATCTGT  | 181 | 36  | RDR2-resistant |
| GATGACGTGCTGCGGGATACCAAA  | 0   | 10  | RDR2-sensitive |
| GATGACTCACCAGAACGACGCGCT  | 0   | 14  | RDR2-sensitive |
| GATGACTCGACGTTAAACGCGAAC  | 1   | 14  | RDR2-sensitive |
| GATGACTCGCAGAACGACGACGAG  | 0   | 9   | RDR2-sensitive |
| GATGACTCGCCAGAACGACACGTT  | 1   | 23  | RDR2-sensitive |
| GATGACTCGCCAGAACGACGCGCC  | 3   | 92  | RDR2-sensitive |
| GATGACTCGCCAGAACGACGCGCT  | 0   | 19  | RDR2-sensitive |
| GATGACTCGCTAGAACGACGCGCC  | 0   | 9   | RDR2-sensitive |
| GATGACTCTCCAGAACGACGCGCC  | 1   | 27  | RDR2-sensitive |
| GATGACTCTTGGTATCGACGGCCT  | 0   | 13  | RDR2-sensitive |
| GATGACTGAGCACACGCGCTGGCA  | 4   | 32  | RDR2-sensitive |
| GATGACTGAGCACACGTGCTGGCA  | 1   | 12  | RDR2-sensitive |
| GATGACTGCAGATAGGGAGAGACA  | 0   | 10  | RDR2-sensitive |
| GATGACTGCATACTTATCCATCGT  | 1   | 12  | RDR2-sensitive |
| GATGACTGCCGGCGGCGTTGTGGAC | 0   | 11  | RDR2-sensitive |
| GATGACTGGAAGTAGGGACGCTAT  | 0   | 13  | RDR2-sensitive |
| GATGACTGGAAGTAGGGACGTTCT  | 0   | 29  | RDR2-sensitive |
| GATGACTGGCTCATGCGGCACTGA  | 1   | 17  | RDR2-sensitive |
| GATGACTGGGCACACGTGCTGGCA  | 2   | 139 | RDR2-sensitive |
| GATGACTGGGCATACGTGCTGGCA  | 3   | 26  | RDR2-sensitive |
| GATGACTGGTGACGCATGGTGAC   | 0   | 35  | RDR2-sensitive |
| GATGACTGTCGGAGATGCGAGCAG  | 0   | 12  | RDR2-sensitive |
| GATGAGAAGACTGTTGTAGATGGC  | 21  | 0   | RDR2-resistant |
| GATGAGACTAGAGTAGAGGCCGAA  | 1   | 18  | RDR2-sensitive |
| GATGAGACTGGAGTAGAAGCCGAA  | 1   | 23  | RDR2-sensitive |
| GATGAGACTGGAGTAGAGGCCGAA  | 12  | 197 | RDR2-sensitive |
| GATGAGACTGGAGTAGAGGCCGCA  | 0   | 9   | RDR2-sensitive |
| GATGAGACTGGAGTAGAGGTCGAA  | 1   | 12  | RDR2-sensitive |
| GATGAGACTGGAGTAGAGCCGAC   | 0   | 17  | RDR2-sensitive |

|                            |    |    |                |
|----------------------------|----|----|----------------|
| GATGAGCACGTACTCTCCGTCGGC   | 1  | 24 | RDR2-sensitive |
| GATGAGCCTTTGCAGAATCTGATG   | 26 | 1  | RDR2-resistant |
| GATGAGCTCGTATCGGCCTAGGCA   | 0  | 14 | RDR2-sensitive |
| GATGAGCTCTGCCAGCAATCGCAA   | 0  | 11 | RDR2-sensitive |
| GATGAGCTGACTGTTGGATAGCGG   | 0  | 11 | RDR2-sensitive |
| GATGAGCTGGCACGAGCACGACAC   | 0  | 19 | RDR2-sensitive |
| GATGAGGACAACAGTGGCACACAG   | 0  | 22 | RDR2-sensitive |
| GATGAGGATGGATATGGGATGCTA   | 0  | 12 | RDR2-sensitive |
| GATGAGGATGTGCCGATTCCGGCT   | 20 | 0  | RDR2-resistant |
| GATGAGGATGTGCTAGATTCCGGCT  | 58 | 6  | RDR2-resistant |
| GATGAGTATGTGGGCTGACGGTCT   | 0  | 24 | RDR2-sensitive |
| GATGAGTATTTCTGATCGTTGGAT   | 0  | 19 | RDR2-sensitive |
| GATGAGTTTGTCTGTCGTTCCGTACC | 24 | 1  | RDR2-resistant |
| GATGATAGCGGTGTAGTGAGACGA   | 3  | 91 | RDR2-sensitive |
| GATGATAGGATGTAATTCGGCTGC   | 0  | 11 | RDR2-sensitive |
| GATGATCACGGCAGACAGACAGTG   | 0  | 10 | RDR2-sensitive |
| GATGATCAGAGACACAAGGGCAGC   | 0  | 21 | RDR2-sensitive |
| GATGATCAGGAAGGAGCGTGGCGT   | 0  | 13 | RDR2-sensitive |
| GATGATCATGACTTGAAACGGTGT   | 0  | 14 | RDR2-sensitive |
| GATGATCGTTCTTTTTGGCCAACT   | 22 | 0  | RDR2-resistant |
| GATGATTTGGCGGCGTCACTTTAT   | 0  | 19 | RDR2-sensitive |
| GATGCACAGTAGGACCTTCGGCGA   | 0  | 19 | RDR2-sensitive |
| GATGCACCTCTGCGGTCGGGACGA   | 3  | 28 | RDR2-sensitive |
| GATGCACTACCGGAATCGACGGCT   | 0  | 10 | RDR2-sensitive |
| GATGCACTGATGGTAGAAGAACGT   | 0  | 9  | RDR2-sensitive |
| GATGCAGATCCCGGGAGAAGACGT   | 2  | 49 | RDR2-sensitive |
| GATGCAGGACGACCGTTGAAACAG   | 0  | 20 | RDR2-sensitive |
| GATGCAGTACAAGATCGTCCCGGA   | 0  | 9  | RDR2-sensitive |
| GATGCAGTCGGAGATGGACGCGGT   | 38 | 7  | RDR2-resistant |
| GATGCATCTTCAAGTTGAATTCGG   | 4  | 20 | RDR2-sensitive |
| GATGCCCTACTGTAGACGGTCAGA   | 0  | 20 | RDR2-sensitive |
| GATGCCCTACTGTAGACGGTCAGT   | 0  | 11 | RDR2-sensitive |
| GATGCCGCGGTGTAGGGATGGGCG   | 0  | 24 | RDR2-sensitive |
| GATGCGACAGGGCCTCTGCGGCAT   | 1  | 29 | RDR2-sensitive |
| GATGCGACAGGGTAGAAGGGGTAT   | 0  | 25 | RDR2-sensitive |
| GATGCGACGCAGCAGGACGACGAC   | 0  | 12 | RDR2-sensitive |
| GATGCGACGGTAGATGGCGACGAC   | 0  | 9  | RDR2-sensitive |
| GATGCGACTGAACCAGCACAGACG   | 0  | 20 | RDR2-sensitive |
| GATGCGATTGTGGAGACCGTGCTG   | 3  | 29 | RDR2-sensitive |
| GATGCGCGGGGTAGACAAACGGAC   | 0  | 10 | RDR2-sensitive |
| GATGCGCGGGGTAGACAAACGGGC   | 0  | 55 | RDR2-sensitive |
| GATGCGGAAGTTTGGCTACTGTAT   | 0  | 22 | RDR2-sensitive |
| GATGCGGAGCCTGCTGGAGAGCGC   | 0  | 11 | RDR2-sensitive |
| GATGCGGCACAGCAGGACGACGAC   | 0  | 26 | RDR2-sensitive |
| GATGCGGCGAGGCCTGAGGTTGGA   | 18 | 1  | RDR2-resistant |
| GATGCGGCGCAGCAGGACGACGAC   | 3  | 48 | RDR2-sensitive |
| GATGCGGCGTCGGATCCGGTCCAG   | 1  | 13 | RDR2-sensitive |
| GATGCGGCTGAACTGGATGACGTC   | 0  | 27 | RDR2-sensitive |
| GATGCGGGAGCTGCTGGAGACGTC   | 0  | 56 | RDR2-sensitive |

|                           |   |     |                |
|---------------------------|---|-----|----------------|
| GATGCGGGAGTTTGGCTACTGTAT  | 0 | 21  | RDR2-sensitive |
| GATGCGGGCTGTCAGGAGACGTAA  | 0 | 10  | RDR2-sensitive |
| GATGCTCGACGAACGGACGGCTTA  | 0 | 15  | RDR2-sensitive |
| GATGCTCGGCTGGGAATCGTGGCT  | 0 | 11  | RDR2-sensitive |
| GATGCTCGTAGGACAGAGACCGGC  | 0 | 14  | RDR2-sensitive |
| GATGCTCTCTGTGGACACGCGGAC  | 0 | 14  | RDR2-sensitive |
| GATGCTCTGGATAGTTTGATTGCA  | 7 | 210 | RDR2-sensitive |
| GATGCTGCAGAACTAGGCATTGGG  | 0 | 48  | RDR2-sensitive |
| GATGCTTCGAGCCAGGTTGGACTG  | 0 | 9   | RDR2-sensitive |
| GATGCTTCGGACTTGGTGCGGCTA  | 0 | 10  | RDR2-sensitive |
| GATGCTTTTGGACAGGACGACGTT  | 0 | 9   | RDR2-sensitive |
| GATGCTTTTGGGTAGGACGACGTC  | 0 | 11  | RDR2-sensitive |
| GATGCTTTTGTGAGTCGGCAACAT  | 0 | 9   | RDR2-sensitive |
| GATGGAAGCTAGAGCAGAGTCAT   | 0 | 9   | RDR2-sensitive |
| GATGGAACACAAGAGGTGGGACAA  | 1 | 16  | RDR2-sensitive |
| GATGGAACTGTGGGACGCGGTGGA  | 1 | 13  | RDR2-sensitive |
| GATGGAAGGCAGAACGGCAGGCTA  | 0 | 31  | RDR2-sensitive |
| GATGGAAGTAGAGTCCGGCCAGGT  | 0 | 14  | RDR2-sensitive |
| GATGGAATCTGGATGACGTGACGT  | 0 | 10  | RDR2-sensitive |
| GATGGACACTGCACAGAAGGACAC  | 0 | 14  | RDR2-sensitive |
| GATGGACAGAAGAGGCAGCTCGAC  | 1 | 17  | RDR2-sensitive |
| GATGGACAGCGAGAGGAGGAGGAG  | 0 | 11  | RDR2-sensitive |
| GATGGACATCTATAACGCCGGCAC  | 0 | 10  | RDR2-sensitive |
| GATGGACCAACGGCTGCACATGCA  | 0 | 17  | RDR2-sensitive |
| GATGGACCAAGAGCGGTGAAGGAC  | 0 | 19  | RDR2-sensitive |
| GATGGACCAATTACACGTAGCCGA  | 3 | 72  | RDR2-sensitive |
| GATGGACCACTCACGAACAGAGGC  | 0 | 15  | RDR2-sensitive |
| GATGGACCAGCACGGAGGATTCAT  | 0 | 15  | RDR2-sensitive |
| GATGGACCAGGTGGGATGGAACAG  | 0 | 9   | RDR2-sensitive |
| GATGGACCATGCACCCATGGACGT  | 0 | 10  | RDR2-sensitive |
| GATGGACCGGTCTGAAGCATGGAA  | 0 | 10  | RDR2-sensitive |
| GATGGACGAAC TAAGTCGCGACGA | 0 | 16  | RDR2-sensitive |
| GATGGACGAAC TATGTCGCGGCGA | 1 | 12  | RDR2-sensitive |
| GATGGACGAAGAGCGAACGCACGG  | 0 | 21  | RDR2-sensitive |
| GATGGACGAGGAAGCAAGCCTGGC  | 0 | 9   | RDR2-sensitive |
| GATGGACGATGCAGATTGGCTGAA  | 1 | 18  | RDR2-sensitive |
| GATGGACGCAATCGGACAGTCGGG  | 0 | 10  | RDR2-sensitive |
| GATGGACGCAATCGGACGGTCGAG  | 0 | 23  | RDR2-sensitive |
| GATGGACGCGTCCGGCTCCGGCAT  | 0 | 9   | RDR2-sensitive |
| GATGGACGCTCCAGATTGAACGAA  | 0 | 21  | RDR2-sensitive |
| GATGGACGGAGAAGCATTCCCCAT  | 0 | 9   | RDR2-sensitive |
| GATGGACGGCAGAACGGCAGAACA  | 0 | 41  | RDR2-sensitive |
| GATGGACGGTGCAGATTGGCTGAA  | 0 | 28  | RDR2-sensitive |
| GATGGACGGTGTGGAGGCGAAGAG  | 1 | 15  | RDR2-sensitive |
| GATGGACTAGCACGAGTACGACAT  | 0 | 26  | RDR2-sensitive |
| GATGGACTGACCTGTAGAAGGCAA  | 2 | 31  | RDR2-sensitive |
| GATGGACTGACGTGGCGTTCGACGT | 1 | 20  | RDR2-sensitive |
| GATGGACTGAGACATGGGGACCGA  | 0 | 12  | RDR2-sensitive |
| GATGGACTGCGAGCTGTCCCGGTT  | 0 | 28  | RDR2-sensitive |



|                           |     |     |                |
|---------------------------|-----|-----|----------------|
| GATGGACTGCGGGATCGGACGGCT  | 0   | 19  | RDR2-sensitive |
| GATGGACTGGCATGAGTACGACAT  | 0   | 12  | RDR2-sensitive |
| GATGGACTGGCCCGAAACACGGAA  | 0   | 18  | RDR2-sensitive |
| GATGGACTGTAAGGTACGCACCAG  | 0   | 12  | RDR2-sensitive |
| GATGGACTTAGGTTATGCCGGCTC  | 0   | 13  | RDR2-sensitive |
| GATGGAGAACGATGACGACGGTTC  | 0   | 13  | RDR2-sensitive |
| GATGGAGCATGTGACACGAGGCAG  | 0   | 13  | RDR2-sensitive |
| GATGGAGGACAGTAGCGCGGTGGT  | 68  | 16  | RDR2-resistant |
| GATGGAGGTAGGCCGCGTGCACGGA | 2   | 21  | RDR2-sensitive |
| GATGGAGTTGGACGGTGTGCATCAG | 0   | 9   | RDR2-sensitive |
| GATGGATAAGTTAGGAGCACGATC  | 24  | 0   | RDR2-resistant |
| GATGGATAGTTATCATACCTGCTT  | 18  | 1   | RDR2-resistant |
| GATGGATCACGTGGAGCTGCCGGC  | 0   | 9   | RDR2-sensitive |
| GATGGATCAGTTGTTGAGGACATT  | 105 | 39  | RDR2-resistant |
| GATGGATGTAGATGGACGGTGTAG  | 0   | 14  | RDR2-sensitive |
| GATGGATTCCGATCGGATACGCAT  | 2   | 25  | RDR2-sensitive |
| GATGGATTCTGCAGGGACAGGCGC  | 0   | 10  | RDR2-sensitive |
| GATGGCAAGGAAGATCCGCTCGGA  | 1   | 14  | RDR2-sensitive |
| GATGGCAGAACGGCAGAACACACT  | 0   | 15  | RDR2-sensitive |
| GATGGCAGAACGGCAGAACAGATA  | 0   | 16  | RDR2-sensitive |
| GATGGCAGCGTAGAGGACGACATC  | 0   | 15  | RDR2-sensitive |
| GATGGCAGTACGACTCGTTCCAGA  | 0   | 12  | RDR2-sensitive |
| GATGGCAGTACGACTCGTTCGAGA  | 1   | 39  | RDR2-sensitive |
| GATGGCAGTACGACTCGTTCGAGT  | 0   | 14  | RDR2-sensitive |
| GATGGCAGTTAGGCTATGCGACTC  | 0   | 10  | RDR2-sensitive |
| GATGGCATGTACTTAGGGCGCTAG  | 1   | 25  | RDR2-sensitive |
| GATGGCCAAGCCGACGCTGAATCA  | 32  | 0   | RDR2-resistant |
| GATGGCCAGGAACAACAACGACGG  | 0   | 13  | RDR2-sensitive |
| GATGGCCCATGTCGGATCGGTCCA  | 0   | 9   | RDR2-sensitive |
| GATGGCGACAAGTGACGAAGACAA  | 0   | 18  | RDR2-sensitive |
| GATGGCGAGAATGACAGATGACAA  | 27  | 3   | RDR2-resistant |
| GATGGCGATTGTGGAACAGGCACA  | 0   | 10  | RDR2-sensitive |
| GATGGCGCAGACTGTGGGAGCGGC  | 2   | 15  | RDR2-sensitive |
| GATGGCGGGCGGGCGTAGGTAGGC  | 0   | 9   | RDR2-sensitive |
| GATGGCTAGGAACAACAACGACGG  | 1   | 127 | RDR2-sensitive |
| GATGGCTAGGAACAACGACGACGG  | 0   | 14  | RDR2-sensitive |
| GATGGCTAGGTCTGTTAAGAGGTT  | 0   | 45  | RDR2-sensitive |
| GATGGCTGCAGCGATTGACTGGAT  | 0   | 18  | RDR2-sensitive |
| GATGGCTGGTACGGACGGGAGGAG  | 0   | 10  | RDR2-sensitive |
| GATGGCTTTTGCTCTAGACGCCGT  | 0   | 14  | RDR2-sensitive |
| GATGGGAATGGCAGAACACGGAAA  | 0   | 10  | RDR2-sensitive |
| GATGGGACACACGATACTACGGAC  | 0   | 10  | RDR2-sensitive |
| GATGGGACACGCTTGACGAGACGC  | 0   | 16  | RDR2-sensitive |
| GATGGGACCAGTGAAGCGGACGC   | 18  | 0   | RDR2-resistant |
| GATGGGACGAGTGGAGGACATCAC  | 0   | 11  | RDR2-sensitive |
| GATGGGACGCACGCTGGTACGGAA  | 0   | 16  | RDR2-sensitive |
| GATGGGAGCGGCTGGGAGCAGAGG  | 14  | 0   | RDR2-resistant |
| GATGGGAGGCAGAACGGCAGAACG  | 0   | 10  | RDR2-sensitive |
| GATGGGCAAGGTGGATGGCGGCCG  | 0   | 15  | RDR2-sensitive |

|                           |    |    |                |
|---------------------------|----|----|----------------|
| GATGGGCCATGCACACACGGACGC  | 0  | 33 | RDR2-sensitive |
| GATGGGCGCGAAGTAGGCCGGCAT  | 1  | 23 | RDR2-sensitive |
| GATGGGCGCGAAGTAGGCCGGCAC  | 0  | 13 | RDR2-sensitive |
| GATGGGCGTGAAGTAGGCCGGCAC  | 0  | 19 | RDR2-sensitive |
| GATGGGCTGCGACACACCGGATG   | 0  | 9  | RDR2-sensitive |
| GATGGGCTGTAAAAGAGGGTGTTT  | 1  | 14 | RDR2-sensitive |
| GATGGGCTGTAGAATGGGCCGCAC  | 0  | 12 | RDR2-sensitive |
| GATGGGCTGTCACGAACACGGCAT  | 0  | 17 | RDR2-sensitive |
| GATGGGCTTGAATGGTGCTCGGT   | 0  | 12 | RDR2-sensitive |
| GATGGGGAGTGTTGCTGGAAACGG  | 1  | 61 | RDR2-sensitive |
| GATGGGGTAGACAAAGGATAGCAT  | 0  | 19 | RDR2-sensitive |
| GATGGGGTGACCGAACGACGACGG  | 0  | 10 | RDR2-sensitive |
| GATGGGGTTGGTAGCGGACGGTGT  | 0  | 9  | RDR2-sensitive |
| GATGGGTACGGGTATGGAATGGTA  | 1  | 67 | RDR2-sensitive |
| GATGGGTCGAGCGCGAGGGCGAGC  | 0  | 9  | RDR2-sensitive |
| GATGGGTCGAGCGCGTGGGCCGAGC | 9  | 34 | RDR2-sensitive |
| GATGGGTCGGCCCGAATCACGGAA  | 0  | 12 | RDR2-sensitive |
| GATGGGTCGGCGCGAGACGGAAACA | 1  | 12 | RDR2-sensitive |
| GATGGGTCGGCGCGAGACGGAGCA  | 0  | 32 | RDR2-sensitive |
| GATGGGTCGGCGCGAGACGGAGCG  | 1  | 24 | RDR2-sensitive |
| GATGGGTCGTCAGATCACGTCCGA  | 0  | 11 | RDR2-sensitive |
| GATGGGTCTGGACCGTGCCGGTAT  | 0  | 25 | RDR2-sensitive |
| GATGGGTTCCGACGACTCGACGGTA | 0  | 14 | RDR2-sensitive |
| GATGGTACACTACACATGGTCCGA  | 0  | 18 | RDR2-sensitive |
| GATGGTAGGACCAGGCGACCACGT  | 0  | 15 | RDR2-sensitive |
| GATGGTAGGCTTTGGACGGACGGGA | 0  | 10 | RDR2-sensitive |
| GATGGTATTGCGCCAGGTCGCGGA  | 0  | 14 | RDR2-sensitive |
| GATGGTCAGTCGGCGAGCTGGCAA  | 0  | 14 | RDR2-sensitive |
| GATGGTCCGTGGCTCTGGACCGGA  | 0  | 13 | RDR2-sensitive |
| GATGGTCCTTTAACGAGCGTCCGT  | 0  | 15 | RDR2-sensitive |
| GATGGTCGTGGATCCCTTGATGGC  | 88 | 5  | RDR2-resistant |
| GATGGTCTGGACACGTAGCGGCGC  | 0  | 24 | RDR2-sensitive |
| GATGGTCTGTATCGCGTACCGGTT  | 0  | 13 | RDR2-sensitive |
| GATGGTCTGTGGACACGGATCCAT  | 4  | 26 | RDR2-sensitive |
| GATGGTCTGTGGCTCTAGGCCGGA  | 0  | 21 | RDR2-sensitive |
| GATGGTGA ACTATGCCTGAGCGGG | 15 | 0  | RDR2-resistant |
| GATGGTGACCTCGACAAGCAGCTT  | 27 | 0  | RDR2-resistant |
| GATGGTGACTGTGCGGCCAACTGC  | 0  | 13 | RDR2-sensitive |
| GATGGTGAGCTGTGTTACCTCGGC  | 0  | 12 | RDR2-sensitive |
| GATGGTGAGCTTTGGGCAGACTGG  | 0  | 29 | RDR2-sensitive |
| GATGGTGAGTCGGCATATGTCCAT  | 0  | 11 | RDR2-sensitive |
| GATGGTGAGTCGGCATATGTCTAT  | 0  | 12 | RDR2-sensitive |
| GATGGTGCGGTAGAAGCCAGGCAT  | 0  | 17 | RDR2-sensitive |
| GATGGTGGAGGAGACGAGATCTGC  | 0  | 9  | RDR2-sensitive |
| GATGGTGGGCTTTAGACGGACTGG  | 0  | 9  | RDR2-sensitive |
| GATGGTGGGCTTTGGACGAAGGCA  | 0  | 10 | RDR2-sensitive |
| GATGGTGGGCTTTGGCGGACTGGC  | 0  | 73 | RDR2-sensitive |
| GATGGTGTCCGGTGGATAAGGCAT  | 0  | 14 | RDR2-sensitive |
| GATGGTTAAGACTGTGTTCAACGG  | 0  | 11 | RDR2-sensitive |

|                           |    |    |                |
|---------------------------|----|----|----------------|
| GATGGTCCGGATCTGAGGAGAAT   | 0  | 11 | RDR2-sensitive |
| GATGGTCTGCAGAAGGAGTTGTC   | 32 | 2  | RDR2-resistant |
| GATGGTTGAGATCGTAGAACGGCA  | 0  | 12 | RDR2-sensitive |
| GATGGTTTGCCGGACAGCGACGGA  | 0  | 13 | RDR2-sensitive |
| GATGGTTTGTCCGACAACAGCGGC  | 0  | 12 | RDR2-sensitive |
| GATGTACACGGGACTAGATGGAGC  | 0  | 11 | RDR2-sensitive |
| GATGTACGTCGAGCGCAGGAACGG  | 0  | 47 | RDR2-sensitive |
| GATGTACTTCTGGATACGGGTCGG  | 0  | 10 | RDR2-sensitive |
| GATGTAGACTCTTATGTCCGACGG  | 0  | 19 | RDR2-sensitive |
| GATGTAGAGCACAAGGACGGTGAT  | 0  | 12 | RDR2-sensitive |
| GATGTAGAGCCGAAGAGAGGTGAA  | 1  | 12 | RDR2-sensitive |
| GATGTAGAGCCGACACAAGACCGA  | 0  | 27 | RDR2-sensitive |
| GATGTAGAGGTCGGCTTCCCGGAA  | 2  | 20 | RDR2-sensitive |
| GATGTAGAGTGCATCAGACGCCGG  | 56 | 0  | RDR2-resistant |
| GATGTAGAGTGGACGGTGATGGCC  | 0  | 13 | RDR2-sensitive |
| GATGTAGTCTCTCTGCTCGGTCGT  | 0  | 41 | RDR2-sensitive |
| GATGTAGTCTGTAGCGGAGAGTAT  | 0  | 19 | RDR2-sensitive |
| GATGTATCTTCAAGTTGAATTCGG  | 1  | 12 | RDR2-sensitive |
| GATGTATGTAGAGGAGTAGCGCAT  | 0  | 27 | RDR2-sensitive |
| GATGTCAAGTTACTGCGGTATTCA  | 14 | 0  | RDR2-resistant |
| GATGTCACGTAAGGAGACGAGCT   | 0  | 15 | RDR2-sensitive |
| GATGTCAGGCCACAGAGAGACGCG  | 0  | 10 | RDR2-sensitive |
| GATGTCATCGACGTAGAGGAGGCA  | 0  | 9  | RDR2-sensitive |
| GATGTCCAAACAGGTCGCACGGTC  | 0  | 9  | RDR2-sensitive |
| GATGTCCACCTACGTCATGGACTG  | 0  | 14 | RDR2-sensitive |
| GATGTCCTGTAGCTCAACGGTGAT  | 0  | 11 | RDR2-sensitive |
| GATGTCGACGGAGCGCTGATGGCG  | 0  | 19 | RDR2-sensitive |
| GATGTCGGCGTAGAGGAAGCAGAC  | 0  | 10 | RDR2-sensitive |
| GATGTCGGGCAGAACACGGTGAC   | 0  | 42 | RDR2-sensitive |
| GATGTCGTCGTGTCTCTGGCGGCA  | 0  | 13 | RDR2-sensitive |
| GATGTCGTTGTGCGAACCAGGCAT  | 0  | 12 | RDR2-sensitive |
| GATGTCTAGCATGTCGTCCTCGGA  | 42 | 4  | RDR2-resistant |
| GATGTCTAGTCGGTCTCATCGCAT  | 0  | 9  | RDR2-sensitive |
| GATGTCTATGTGCTTTGTGCGGCT  | 25 | 2  | RDR2-resistant |
| GATGTCTCACTGCAACGTCGGGCA  | 0  | 10 | RDR2-sensitive |
| GATGTCTCTGAACAGGCTGAGCAT  | 0  | 23 | RDR2-sensitive |
| GATGTCTGGATTGGAGCAGGCCAT  | 1  | 15 | RDR2-sensitive |
| GATGTCTGGATTGGAGCAGGCCGT  | 0  | 12 | RDR2-sensitive |
| GATGTCTTCGACCCGACGAACCGGC | 1  | 14 | RDR2-sensitive |
| GATGTGAGGACTAGACTGAGACGG  | 0  | 14 | RDR2-sensitive |
| GATGTGCAGTGTGATGGTCTGGGT  | 15 | 0  | RDR2-resistant |
| GATGTGGACATATAGGACGGCTGC  | 0  | 10 | RDR2-sensitive |
| GATGTGGACTGACACGAAGGCCGA  | 0  | 67 | RDR2-sensitive |
| GATGTGGCCAGACTCTGCAGACGC  | 0  | 29 | RDR2-sensitive |
| GATGTGGCTCAGCAACGATGGCAT  | 0  | 9  | RDR2-sensitive |
| GATGTGGCTCGACAACGATGACGT  | 1  | 23 | RDR2-sensitive |
| GATGTGGCTCGGCAACGACGACGT  | 1  | 20 | RDR2-sensitive |
| GATGTGGGACGCCAGGCATTGACT  | 0  | 44 | RDR2-sensitive |
| GATGTGGGACTAAAGCCAGGACGC  | 0  | 12 | RDR2-sensitive |

|                           |       |     |                |
|---------------------------|-------|-----|----------------|
| GATGTGGGACTAAAGCCGAGGCAC  | 1     | 22  | RDR2-sensitive |
| GATGTGGGACTAAAGCCGGGACAC  | 0     | 9   | RDR2-sensitive |
| GATGTGGGACTAAAGCCGGGACGC  | 3     | 48  | RDR2-sensitive |
| GATGTGGGACTAAAGCCGGGGCGC  | 3     | 86  | RDR2-sensitive |
| GATGTGGGCAGCAGAACCAATCGG  | 0     | 24  | RDR2-sensitive |
| GATGTGGTACTATGTGGGAGCGTT  | 1     | 12  | RDR2-sensitive |
| GATGTGGTTGTGTGGAGGAGGTGC  | 52    | 6   | RDR2-resistant |
| GATGTGTAGTGCATGGTCTGGGT   | 14    | 0   | RDR2-resistant |
| GATGTGTAGTGTGATGATCTGGGT  | 74    | 0   | RDR2-resistant |
| GATGTGTAGTGTGATGGCCTGGGT  | 20    | 0   | RDR2-resistant |
| GATGTGTAGTGTGATGGGCTGGGT  | 21    | 0   | RDR2-resistant |
| GATGTGTAGTGTGATGGTCTGGGA  | 26    | 0   | RDR2-resistant |
| GATGTGTAGTGTGATGGTCTGGGC  | 43    | 1   | RDR2-resistant |
| GATGTGTAGTGTGATGGTCTGGGG  | 60    | 0   | RDR2-resistant |
| GATGTGTAGTGTGATGGTCTGGGT  | 13261 | 261 | RDR2-resistant |
| GATGTTACGGCACCTGAACGAGGC  | 1     | 32  | RDR2-sensitive |
| GATGTTCTGTAATTGTTGTCGGTA  | 0     | 9   | RDR2-sensitive |
| GATGTTCTTGATTGGTCGGTCAAA  | 17    | 0   | RDR2-resistant |
| GATGTTGATCCAAGGGAACGCGCA  | 0     | 15  | RDR2-sensitive |
| GATGTTGATCCAAGGGGACGTGCG  | 0     | 10  | RDR2-sensitive |
| GATGTTGCTGGACGCCGTAGCGGA  | 0     | 32  | RDR2-sensitive |
| GATGTTGGAGGCAGGGTCGACGAG  | 0     | 11  | RDR2-sensitive |
| GATGTTGCCAACTCGAACGTCGT   | 0     | 15  | RDR2-sensitive |
| GATGTTGGGCAGTCGCGAAGACGC  | 0     | 10  | RDR2-sensitive |
| GATGTTGTGACTGAGCCGGCCTAG  | 0     | 11  | RDR2-sensitive |
| GATGTTGTTTTACATCACAGTCGG  | 1     | 17  | RDR2-sensitive |
| GATGTTTAGTGGACTGTGTGCATG  | 0     | 28  | RDR2-sensitive |
| GATGTTTCTATACTGTAGCGGTTT  | 0     | 10  | RDR2-sensitive |
| GATGTTTCTTCGTCAGGACACACA  | 1     | 24  | RDR2-sensitive |
| GATGTTTGGACTGACACCTACGGC  | 0     | 12  | RDR2-sensitive |
| GATGTTTTTTCGGATCTTTGGCTA  | 14    | 0   | RDR2-resistant |
| GATGTTTTTTGACTGTATGTCGGG  | 0     | 20  | RDR2-sensitive |
| GATTAATTATCGGGGCTGGGACGG  | 0     | 9   | RDR2-sensitive |
| GATTAATTTTTGGTCGTGCTGGGC  | 0     | 10  | RDR2-sensitive |
| GATTACATCGGTTCTCTTAGGCAT  | 3     | 25  | RDR2-sensitive |
| GATTAGACTTACTGATCGATGGCA  | 11    | 30  | RDR2-sensitive |
| GATTAGACTTACTGATTGTTGGCG  | 35    | 70  | RDR2-sensitive |
| GATTAGATGGTATCGTTCGTCGGT  | 0     | 11  | RDR2-sensitive |
| GATTAGCTAGCGGGCTGTGCCGGT  | 0     | 9   | RDR2-sensitive |
| GATTAGCTGGGGGAACGAAGACGG  | 0     | 12  | RDR2-sensitive |
| GATTAGGGATTTAGCGGTGGGCGT  | 0     | 13  | RDR2-sensitive |
| GATTAGGGGAGGCTGTAGTGGGGC  | 0     | 28  | RDR2-sensitive |
| GATTAGGGGGACTGTAGTGAGGCT  | 0     | 40  | RDR2-sensitive |
| GATTAGTCGGGACCTTGCGCGGTT  | 3     | 31  | RDR2-sensitive |
| GATTATAGGGCTCGATCTCTCGGG  | 0     | 10  | RDR2-sensitive |
| GATTATCTGTTTCGGGCTCAAACGG | 1     | 45  | RDR2-sensitive |
| GATTATGGGAGGCTGTAGTGAGGC  | 0     | 10  | RDR2-sensitive |
| GATTATGTTTCGTCAGGCTGGGCAC | 0     | 32  | RDR2-sensitive |
| GATTATTCAAGGACTGTTCAGGCA  | 1091  | 43  | RDR2-resistant |

|                             |     |    |                |
|-----------------------------|-----|----|----------------|
| GATTATTCAAGGACTGTTCAGGCT    | 36  | 4  | RDR2-resistant |
| GATTCAATATGTTATCTTGTCGGA    | 45  | 4  | RDR2-resistant |
| GATTCAATCGACTAATCGGGCTAT    | 0   | 11 | RDR2-sensitive |
| GATTCACGCAGGGACGGTAGAGCA    | 0   | 39 | RDR2-sensitive |
| GATTCCAGGACGGAGCCGTATGAG    | 0   | 11 | RDR2-sensitive |
| GATTCCGGTAGTGTAGTGGGCGAC    | 0   | 24 | RDR2-sensitive |
| GATTCGAAATCGGAATGCAGCGGA    | 42  | 4  | RDR2-resistant |
| GATTCGAAGATTCCGGCGGAGACAG   | 0   | 10 | RDR2-sensitive |
| GATTCGAAGGCTGTCCGCTAGGAC    | 0   | 10 | RDR2-sensitive |
| GATTCCGCGGCGTGGATGTTGAGGC   | 0   | 10 | RDR2-sensitive |
| GATTCCGCGGGCGGGAGGAAGACGC   | 0   | 42 | RDR2-sensitive |
| GATTCCGCGGGCGTGAGGAAGACGC   | 0   | 14 | RDR2-sensitive |
| GATTCCGGCTCTGCAAGTTGGACGC   | 0   | 10 | RDR2-sensitive |
| GATTCCGGGTAGGACGATGATGGC    | 3   | 40 | RDR2-sensitive |
| GATTCCGGGTAGGATGATGATGGC    | 8   | 55 | RDR2-sensitive |
| GATTCCGGGTGGGATGATGATGGC    | 1   | 14 | RDR2-sensitive |
| GATTCCGGTCCGGTCCGGTCCGGCGAT | 5   | 44 | RDR2-sensitive |
| GATTCCGGTGTAGATAACAACCGGTT  | 47  | 13 | RDR2-resistant |
| GATTCCGTTTCGGTATCTGGGCGGC   | 0   | 22 | RDR2-sensitive |
| GATTCTACAGTCGGCCCCGTCGATC   | 0   | 16 | RDR2-sensitive |
| GATTCTCCGAAGCGGACTGACGGT    | 0   | 13 | RDR2-sensitive |
| GATTCTGTAGCAACGCACGGGCAT    | 0   | 29 | RDR2-sensitive |
| GATTGAACGAAGGCAGAACGGCAG    | 0   | 9  | RDR2-sensitive |
| GATTGAAGTCTGGAGCGAGCTGGT    | 2   | 14 | RDR2-sensitive |
| GATTGACGTTCCGGATCGGCGCCAA   | 0   | 10 | RDR2-sensitive |
| GATTGACTGGATGGCGTACTCTAT    | 0   | 39 | RDR2-sensitive |
| GATTGAGTGGGATTGGATGGGTTT    | 2   | 27 | RDR2-sensitive |
| GATTGATCCAATTGCTGAGGCGTA    | 14  | 0  | RDR2-resistant |
| GATTGATGGTAATCGCTTCTGGAC    | 217 | 11 | RDR2-resistant |
| GATTGATTGGACGTTTGACGGACG    | 23  | 3  | RDR2-resistant |
| GATTGATTGTAGGCTGTGTTGGTT    | 9   | 33 | RDR2-sensitive |
| GATTGCACCCTGATCGAGGACGCT    | 0   | 12 | RDR2-sensitive |
| GATTGCAGAACGGTAGGCTACCTT    | 0   | 12 | RDR2-sensitive |
| GATTGCAGAGCTCGCCAGACGACC    | 0   | 26 | RDR2-sensitive |
| GATTGCAGGATGGCAGAACGACAG    | 0   | 20 | RDR2-sensitive |
| GATTGCGGGATAGAGGACGAACAG    | 0   | 9  | RDR2-sensitive |
| GATTGCGTCTGGCACTGGCGGCC     | 0   | 11 | RDR2-sensitive |
| GATTGCGTCTGGCACTGGCGGCCT    | 0   | 22 | RDR2-sensitive |
| GATTGCTGGTCTGCTGGTCCGAG     | 0   | 14 | RDR2-sensitive |
| GATTGGAAGCCTGTATGTGGACGG    | 0   | 25 | RDR2-sensitive |
| GATTGGACCAGGCCTGACGGTTGC    | 1   | 21 | RDR2-sensitive |
| GATTGGACCGCAGGTAGATTTGGA    | 1   | 33 | RDR2-sensitive |
| GATTGGACTCAGGACGGACGACAC    | 0   | 25 | RDR2-sensitive |
| GATTGGAGACTCGGACGGTGACAG    | 0   | 9  | RDR2-sensitive |
| GATTGGATTCCGAGGGGACGACGC    | 0   | 17 | RDR2-sensitive |
| GATTGGATTGAGGAGCAGGGTCAT    | 0   | 9  | RDR2-sensitive |
| GATTGGATTGGGACATCAACACGG    | 0   | 9  | RDR2-sensitive |
| GATTGGCAGGAAGCAGAACGACAG    | 0   | 19 | RDR2-sensitive |
| GATTGGCATATCCAAGTCGGTCTG    | 0   | 10 | RDR2-sensitive |

|                           |    |     |                |
|---------------------------|----|-----|----------------|
| GATTGGCCGGCTGGACAGGGCGTA  | 0  | 17  | RDR2-sensitive |
| GATTGGCTGAAGGCAGAACAGGGG  | 0  | 10  | RDR2-sensitive |
| GATTGGCTGAAGGCAGAACCAGGG  | 1  | 20  | RDR2-sensitive |
| GATTGGCTGAAGGCAGAACGAGGT  | 0  | 47  | RDR2-sensitive |
| GATTGGCTGAAGGCAGAACGCAAG  | 0  | 15  | RDR2-sensitive |
| GATTGGGAGTAGAAGCGAGGGCGA  | 0  | 20  | RDR2-sensitive |
| GATTGGGTTCGTATTGTGAGGCGTT | 0  | 104 | RDR2-sensitive |
| GATTGGTCGCATCTCCAGAGCCAG  | 0  | 10  | RDR2-sensitive |
| GATTGGTCGGTCCGAAGCACGGAA  | 0  | 22  | RDR2-sensitive |
| GATTGGTTCGGTAGACACGGTCTA  | 0  | 12  | RDR2-sensitive |
| GATTGGTTGCTTGGATACGACGAC  | 0  | 32  | RDR2-sensitive |
| GATTGTATCGACTATGTACGGCTA  | 0  | 21  | RDR2-sensitive |
| GATTGTATCTGGAGCGAGCTGGCG  | 0  | 9   | RDR2-sensitive |
| GATTGTATTGCACGGAGATGGGCT  | 0  | 10  | RDR2-sensitive |
| GATTGTCAAATGGGCTGAGCCGGT  | 0  | 16  | RDR2-sensitive |
| GATTGTCATCGAACTGTTAGTCGG  | 0  | 10  | RDR2-sensitive |
| GATTGTCGGCACTACAACAGCGTA  | 0  | 9   | RDR2-sensitive |
| GATTGTCTACAGTAGATTGTGCAT  | 0  | 14  | RDR2-sensitive |
| GATTGTGGACGCCTACAGTAGATA  | 0  | 13  | RDR2-sensitive |
| GATTGTGGGGTAGTGGAGCGTGCA  | 0  | 19  | RDR2-sensitive |
| GATTGTGTCTGGAGCGAGCTGGCG  | 0  | 11  | RDR2-sensitive |
| GATTGTGTGTTCGTCGGTTTTGCAT | 22 | 0   | RDR2-resistant |
| GATTGTTACGACCAGACGGAGCAT  | 0  | 16  | RDR2-sensitive |
| GATTGTTGGGGCGAAGGCCAAGAC  | 2  | 16  | RDR2-sensitive |
| GATTGTTGGTTTTGGCTACTCAGG  | 81 | 4   | RDR2-resistant |
| GATTGTTTTAACATGGTTGTTCCGG | 66 | 0   | RDR2-resistant |
| GATTTAAAGGCGTAGACGAGGGTT  | 0  | 23  | RDR2-sensitive |
| GATTTAATCGGGCCAAGGCCACAAC | 0  | 9   | RDR2-sensitive |
| GATTTAATTAATGGATCGACGGG   | 0  | 17  | RDR2-sensitive |
| GATTTAGGGCTAGTTTGGATCGGC  | 3  | 20  | RDR2-sensitive |
| GATTTATATTGTATGCAGTCGGAC  | 0  | 13  | RDR2-sensitive |
| GATTTCCGGAGCGTGGGAACGGCG  | 0  | 14  | RDR2-sensitive |
| GATTTCCGCGACGTGTGGAGGCCA  | 0  | 9   | RDR2-sensitive |
| GATTTCCGTTAGTTCCGTTTTCCGT | 0  | 9   | RDR2-sensitive |
| GATTTCTCGGGATCGTTCGACGAC  | 2  | 35  | RDR2-sensitive |
| GATTTGAGGATCGTGCGAGGCTGT  | 0  | 13  | RDR2-sensitive |
| GATTTGATCTATTCGCGGACGTCT  | 0  | 10  | RDR2-sensitive |
| GATTTGATGGATATAGATGGACGG  | 0  | 10  | RDR2-sensitive |
| GATTTGATGGATGTAGATGGACGG  | 0  | 11  | RDR2-sensitive |
| GATTTGATGTAGAGGGCAGATATG  | 19 | 0   | RDR2-resistant |
| GATTTGATTGGTTATTCCGGATGCA | 14 | 0   | RDR2-resistant |
| GATTTGGCCTGAGAGATGCAGCAG  | 0  | 16  | RDR2-sensitive |
| GATTTGGCGGCGTCACTTTATGTT  | 0  | 33  | RDR2-sensitive |
| GATTTGGGCAGCGACATACTCGGG  | 21 | 0   | RDR2-resistant |
| GATTTGGTCGGTCGGCGCGGCGAT  | 4  | 21  | RDR2-sensitive |
| GATTTGGTCGGTCGGTGCGGCGAT  | 15 | 90  | RDR2-sensitive |
| GATTTGTAGCGCTCCACGGATCGG  | 0  | 11  | RDR2-sensitive |
| GATTTGTAGTGTGATGGTCTGGGT  | 16 | 0   | RDR2-resistant |
| GATTTGTCTCGTTTTGGACTTTCGG | 0  | 10  | RDR2-sensitive |

|                            |     |    |                |
|----------------------------|-----|----|----------------|
| GATTTGTCTCTTGCACTGTCCGGCC  | 0   | 15 | RDR2-sensitive |
| GATTTGTCTCTTGACTGTCCGGCC   | 0   | 21 | RDR2-sensitive |
| GATTTGTGCTACTGTGGATGGTGT   | 1   | 31 | RDR2-sensitive |
| GATTTGTTGGTCTTGTGTTGGCGT   | 0   | 10 | RDR2-sensitive |
| GATTTTATAGCGATCGGTTAGGAT   | 17  | 51 | RDR2-sensitive |
| GATTTTATATTTTTTCGTCCGGTC   | 221 | 5  | RDR2-resistant |
| GATTTTCGTGACTGTTTCGGGCAA   | 1   | 13 | RDR2-sensitive |
| GATTTTCGTTGGAGCAGCAGACGC   | 0   | 15 | RDR2-sensitive |
| GATTTTCTCTTCAATCGTCACCAT   | 31  | 0  | RDR2-resistant |
| GATTTTGACTTGTAGGGGATTTAA   | 0   | 9  | RDR2-sensitive |
| GATTTTGGACCCTTAGCTCGGCAT   | 0   | 17 | RDR2-sensitive |
| GATTTTGTAGCAACGCACGGGCAT   | 0   | 12 | RDR2-sensitive |
| GATTTTGTGCTTTCTGGAACCGGC   | 0   | 12 | RDR2-sensitive |
| GATTTTTCGGGATTGGGCTGGGCC   | 0   | 10 | RDR2-sensitive |
| GATTTTTCGGGCCAGTAGAGGGCA   | 0   | 13 | RDR2-sensitive |
| GATTTTTCGGGCCAGTGGAGGGCA   | 21  | 41 | RDR2-sensitive |
| GATTTTTCGGGCTAGTGGAGGGCA   | 0   | 16 | RDR2-sensitive |
| GATTTTTGGACCAGCACGAGCAT    | 0   | 10 | RDR2-sensitive |
| GCAAATGCGGATGTGGAGTCGGA    | 0   | 9  | RDR2-sensitive |
| GCAAACATTCGGACGGAAAGGCGT   | 0   | 10 | RDR2-sensitive |
| GCAAACGGATGGATCGCGAGCGGC   | 0   | 9  | RDR2-sensitive |
| GCAAAGACGCCACCCTTCGCTCGA   | 0   | 9  | RDR2-sensitive |
| GCAAATAACGTGCGGACCGGGCGC   | 0   | 10 | RDR2-sensitive |
| GCAAATCGTTTGGCAAATCGGCTC   | 0   | 11 | RDR2-sensitive |
| GCAAATGACGGACACAGGGGAGAA   | 0   | 16 | RDR2-sensitive |
| GCAACACGAGGACTTCCCAGGAGG   | 21  | 2  | RDR2-resistant |
| GCAACCTAGGACTCAGCACGGTTC   | 0   | 10 | RDR2-sensitive |
| GCAACGACAAATTTACTCGTCCGT   | 0   | 10 | RDR2-sensitive |
| GCAACGACAATTTACTCGTCCGTC   | 3   | 21 | RDR2-sensitive |
| GCAACGACTGTAGAGCGAGTCGGC   | 0   | 30 | RDR2-sensitive |
| GCAACGCGTCTGAGACTGTTCCGT   | 1   | 15 | RDR2-sensitive |
| GCAACGGAAGTACGCTGGGATGAG   | 0   | 16 | RDR2-sensitive |
| GCAACGGACACACCTTCGGCTCGC   | 0   | 10 | RDR2-sensitive |
| GCAACGGACGGGTACGGGCTATAA   | 0   | 23 | RDR2-sensitive |
| GCAACGGATGGCACTTGTACACGC   | 0   | 12 | RDR2-sensitive |
| GCAACGGGAGTACGCTAGGATGAG   | 0   | 9  | RDR2-sensitive |
| GCAACGGTCAGTAGTAACGGCTAT   | 1   | 18 | RDR2-sensitive |
| GCAACGGTCCAGACTCGGATAGAA   | 0   | 13 | RDR2-sensitive |
| GCAACGGTCCGACTGCAACGCATTA  | 0   | 17 | RDR2-sensitive |
| GCAACGGTCCGACTGCAACGCATTT  | 0   | 12 | RDR2-sensitive |
| GCAACGTAGGCTCGACAAAGAGGA   | 0   | 13 | RDR2-sensitive |
| GCAACGTCCCAGTCCGAGGGTGGC   | 0   | 9  | RDR2-sensitive |
| GCAACGTCCGAGGTAGAGCGTGCTG  | 0   | 13 | RDR2-sensitive |
| GCAACTCCGGGCTGGTTGGCGCAC   | 0   | 9  | RDR2-sensitive |
| GCAACTCGGGTGTGCTCTGATGGC   | 0   | 15 | RDR2-sensitive |
| GCAACTTGTATACTTTAGAGGCTA   | 36  | 0  | RDR2-resistant |
| GCAAGAAGGTGCTCGTCCGCTCGGTT | 14  | 0  | RDR2-resistant |
| GCAAGACGGTGTGATCTGAGCGG    | 0   | 9  | RDR2-sensitive |
| GCAAGAGGACGTGCAAGGACTC     | 2   | 38 | RDR2-sensitive |

|                           |    |    |                |
|---------------------------|----|----|----------------|
| GCAAGAGGATTTGTTGTATGAAGA  | 43 | 0  | RDR2-resistant |
| GCAAGATCTCGAAGGCGACGGGTT  | 0  | 15 | RDR2-sensitive |
| GCAAGATCTTGCGGACGACGGGTT  | 0  | 9  | RDR2-sensitive |
| GCAAGATGATCGATTTCGGAGGCGA | 0  | 18 | RDR2-sensitive |
| GCAAGCTTTATGGTTCGATTGGAA  | 16 | 0  | RDR2-resistant |
| GCAAGGAATGAGGACGAGCAAGAA  | 0  | 12 | RDR2-sensitive |
| GCAAGGACGGAGCGAAGACACGGC  | 0  | 13 | RDR2-sensitive |
| GCAAGGAGACGTCAGCAAGGACTC  | 4  | 25 | RDR2-sensitive |
| GCAAGGAGGCGGCGGACAAGTACT  | 0  | 9  | RDR2-sensitive |
| GCAAGGCCCGTGGGCCGTCGGACG  | 15 | 0  | RDR2-resistant |
| GCAAGGGACGGTGTAGTGGATCAC  | 0  | 10 | RDR2-sensitive |
| GCAAGGGAGTGTAGAGATGGCCAA  | 0  | 10 | RDR2-sensitive |
| GCAAGGTAGGTCGCGGACACGCAC  | 0  | 9  | RDR2-sensitive |
| GCAAGTCTCGAACGGCAAGGGCT   | 0  | 10 | RDR2-sensitive |
| GCAAGTCTCGAACGGCACCGGCT   | 0  | 9  | RDR2-sensitive |
| GCAAGTACCGGATGACTGAGCGGA  | 0  | 10 | RDR2-sensitive |
| GCAAGTCGCGGATTGTCCGGCCCA  | 0  | 16 | RDR2-sensitive |
| GCAAGTGAACATGTAGGCGCGCT   | 0  | 10 | RDR2-sensitive |
| GCAAGTGATCCTGTTGACCGTTGT  | 15 | 0  | RDR2-resistant |
| GCAAGTGCGGACTGTCCGCGGCCT  | 0  | 11 | RDR2-sensitive |
| GCAAGGTAGCTCTGCGGACGGCG   | 0  | 9  | RDR2-sensitive |
| GCAAGGTAGCTCTGCGGACGGTG   | 0  | 28 | RDR2-sensitive |
| GCAAGTTAGCGCTGTGTGACGGTG  | 0  | 17 | RDR2-sensitive |
| GCAAGTTCGGATAGGGACGGCTGA  | 1  | 13 | RDR2-sensitive |
| GCAATCCGGCTGCGGCTGCGGCTT  | 0  | 12 | RDR2-sensitive |
| GCAATCCGGCTGCGGCTTCTACAG  | 0  | 14 | RDR2-sensitive |
| GCAATCCGGCTGTGGCTGCGGCTT  | 3  | 19 | RDR2-sensitive |
| GCAATCGGGCGGGTAGTACACGGA  | 0  | 12 | RDR2-sensitive |
| GCAATGACAGGACGGGACGGGATG  | 0  | 17 | RDR2-sensitive |
| GCAATGACGGACGCTATCACCTGC  | 0  | 10 | RDR2-sensitive |
| GCAATGCGGACTGCAGGCACGCAT  | 0  | 26 | RDR2-sensitive |
| GCAATGTAGGACATTGTTACGGTG  | 33 | 1  | RDR2-resistant |
| GCAATTTGAGCATCGTTGGACAAT  | 36 | 7  | RDR2-resistant |
| GCACAACACTGTAGCCGGCTAACC  | 0  | 9  | RDR2-sensitive |
| GCACAACCGTAGAGCCAGAGGCAA  | 0  | 22 | RDR2-sensitive |
| GCACAAGACTGCATGCGCTCGCGG  | 0  | 33 | RDR2-sensitive |
| GCACAAGTCGGGCTGGTGCGGCAC  | 0  | 11 | RDR2-sensitive |
| GCACACAGGACTGTGCAGGCGCAG  | 0  | 18 | RDR2-sensitive |
| GCACACATTTGACGCGTTGGA CTG | 0  | 10 | RDR2-sensitive |
| GCACACCTTGGCACTAAGGACTGT  | 0  | 11 | RDR2-sensitive |
| GCACACCTTGGTACTAAGGACTGT  | 0  | 16 | RDR2-sensitive |
| GCACAGACCGTTCGGCTCGACGTA  | 0  | 9  | RDR2-sensitive |
| GCACAGACTGTAGGTTGGAGACGA  | 0  | 39 | RDR2-sensitive |
| GCACAGAGACGGGAGGACGGAGCA  | 0  | 23 | RDR2-sensitive |
| GCACAGCCGGCTGTACGTAGACGT  | 0  | 17 | RDR2-sensitive |
| GCACAGGACATTGTCTGAACGGCTT | 1  | 23 | RDR2-sensitive |
| GCACAGGACGTAGAGGAGTAGAAG  | 0  | 9  | RDR2-sensitive |
| GCACAGTAGAATAAGCGGACGGGC  | 0  | 13 | RDR2-sensitive |
| GCACATGGACCTGATGGCTTTAAT  | 24 | 2  | RDR2-resistant |



|                          |    |     |                |
|--------------------------|----|-----|----------------|
| GCACATGGGCTGTTGGGTGCCGGT | 0  | 17  | RDR2-sensitive |
| GCACATGTAGATCGGTATCCTCGC | 0  | 9   | RDR2-sensitive |
| GCACCAAATTGAGCGGGCGGACGG | 0  | 10  | RDR2-sensitive |
| GCACCAACGAGGATTAGTCGGAAC | 0  | 13  | RDR2-sensitive |
| GCACCAACGAGGATTAGTCGGGAC | 4  | 29  | RDR2-sensitive |
| GCACCAACTTCGGATTGACGGCGT | 0  | 20  | RDR2-sensitive |
| GCACCAGGTCGCGGACCGTCCGGC | 32 | 169 | RDR2-sensitive |
| GCACCAGTTTCAACGGTCGTCGTG | 1  | 13  | RDR2-sensitive |
| GCACCATCGCAGGACTGACCGGCT | 99 | 0   | RDR2-resistant |
| GCACCCCGGACAGAAGGCAACTA  | 0  | 10  | RDR2-sensitive |
| GCACCGACGTCGAGCAGGAAGCGT | 1  | 15  | RDR2-sensitive |
| GCACCGGACACAGCTACTATTAC  | 0  | 19  | RDR2-sensitive |
| GCACCGGACAGTGAACAGTAACGG | 1  | 56  | RDR2-sensitive |
| GCACCGGACAGTGAACAGTGCATG | 2  | 27  | RDR2-sensitive |
| GCACCGGACTGTCCGATGGCACAC | 0  | 9   | RDR2-sensitive |
| GCACCGGACTGTCCGATGGCGCAC | 0  | 11  | RDR2-sensitive |
| GCACCGGACTGTTAGGTGTACCAC | 0  | 11  | RDR2-sensitive |
| GCACCGGACTGTTCCGTGAGCCAA | 1  | 15  | RDR2-sensitive |
| GCACCGTCATCGCTTGGTCGTCGT | 1  | 101 | RDR2-sensitive |
| GCACCGTCATTGCTTGGTCGTCGT | 0  | 111 | RDR2-sensitive |
| GCACCGTTGGATGTAGAGGGTGTG | 0  | 25  | RDR2-sensitive |
| GCACCGTTGGATGTGGAAGGTGTG | 6  | 61  | RDR2-sensitive |
| GCACCGTTGGATGTGGAGGGTGTG | 47 | 412 | RDR2-sensitive |
| GCACCTCGGCGACGAACAGCACGG | 0  | 11  | RDR2-sensitive |
| GCACCTCGGGCGTGGAAGTGGCAC | 0  | 10  | RDR2-sensitive |
| GCACCTGAACAGCATAGGGCCTGA | 0  | 9   | RDR2-sensitive |
| GCACCTGCTGATAGACCTGGCTAC | 0  | 10  | RDR2-sensitive |
| GCACCTGGACATATCGAAGAGCAC | 0  | 9   | RDR2-sensitive |
| GCACCTGGTCGGTACGTGGTCGGG | 0  | 15  | RDR2-sensitive |
| GCACCTGGTCGGTGGGTGGTCGGT | 7  | 28  | RDR2-sensitive |
| GCACCTGTGGTATGGACGGTCCGT | 1  | 35  | RDR2-sensitive |
| GCACGACACGACTGTTAAACGGAT | 1  | 14  | RDR2-sensitive |
| GCACGACACTGTTAGGGCACGGCC | 0  | 12  | RDR2-sensitive |
| GCACGACATGATTAGGACACGGCC | 0  | 13  | RDR2-sensitive |
| GCACGACCCAGTAGAGCAGGCAGT | 0  | 12  | RDR2-sensitive |
| GCACGACCCTCTGTTTCGACGTC  | 0  | 10  | RDR2-sensitive |
| GCACGACGGCAATACCAATCTGAC | 0  | 9   | RDR2-sensitive |
| GCACGACGGGCTGGGCGTAGACGA | 0  | 12  | RDR2-sensitive |
| GCACGACTAGCACACTGACGGGCC | 0  | 10  | RDR2-sensitive |
| GCACGACTCGTAGTGCTTCGGCAT | 0  | 38  | RDR2-sensitive |
| GCACGACTCTACGGACGACGTCAA | 0  | 9   | RDR2-sensitive |
| GCACGACTGTGGACCAGGCCGCGT | 0  | 12  | RDR2-sensitive |
| GCACGACTGTGTACATGGCGACAT | 0  | 10  | RDR2-sensitive |
| GCACGAGACAGGCTAGCACGGAAC | 0  | 11  | RDR2-sensitive |
| GCACGATAGGACACCTGATCACGG | 0  | 10  | RDR2-sensitive |
| GCACGATCTGGGCACAGGAGCGAC | 0  | 9   | RDR2-sensitive |
| GCACGATGGGCTTGAGCCGGACGG | 0  | 16  | RDR2-sensitive |
| GCACGCAGCACACTCACTCGTCGG | 8  | 73  | RDR2-sensitive |
| GCACGCAGGACTGTGCAGGCACGG | 1  | 32  | RDR2-sensitive |

|                           |   |     |                |
|---------------------------|---|-----|----------------|
| GCACGCCGTGCGACTGGGTAGGCA  | 1 | 14  | RDR2-sensitive |
| GCACGCGGCACACTCACTCGTCGG  | 3 | 17  | RDR2-sensitive |
| GCACGCGGGCGGGTGTAGAGAGGC  | 0 | 13  | RDR2-sensitive |
| GCACGCGTAGAAGGATACATACAT  | 0 | 11  | RDR2-sensitive |
| GCACGCGTCGGTGCGTAGGCGGCG  | 0 | 10  | RDR2-sensitive |
| GCACGCTGGGCTGTGGAGCGCGGG  | 0 | 15  | RDR2-sensitive |
| GCACGGAAAAAAGCACGGCCAG    | 0 | 13  | RDR2-sensitive |
| GCACGGAAAGGGACGCTGCATATAG | 0 | 19  | RDR2-sensitive |
| GCACGGACCGCTCGGCTTATCGGC  | 0 | 14  | RDR2-sensitive |
| GCACGGACTGTGAACGCCTACGGT  | 0 | 21  | RDR2-sensitive |
| GCACGGACTTATGCAGAGGAGCTA  | 0 | 10  | RDR2-sensitive |
| GCACGGATCGACACTACGTACAC   | 0 | 17  | RDR2-sensitive |
| GCACGGCACGACAGGACACGGCAC  | 0 | 45  | RDR2-sensitive |
| GCACGGCACGACTAAGGACCCTTA  | 0 | 9   | RDR2-sensitive |
| GCACGGCACGGAATTGAATCGGAC  | 0 | 14  | RDR2-sensitive |
| GCACGGCACGGTAGAATAAGCGGG  | 0 | 14  | RDR2-sensitive |
| GCACGGCACGGTTAGGACACGGGC  | 0 | 25  | RDR2-sensitive |
| GCACGGCGGGCTCACTATCGGCAC  | 0 | 15  | RDR2-sensitive |
| GCACGGCTAGGCCTGACACGGATT  | 0 | 10  | RDR2-sensitive |
| GCACGGGACCGAGACGAGACGCGT  | 0 | 27  | RDR2-sensitive |
| GCACGGGACTATCAATTGTCGGGC  | 0 | 13  | RDR2-sensitive |
| GCACGGGGCTGTTATGACCGGCAT  | 0 | 9   | RDR2-sensitive |
| GCACGGTAGAATAAACGGGCGGGC  | 0 | 32  | RDR2-sensitive |
| GCACGGTAGAATAAGCGGACGGAC  | 0 | 65  | RDR2-sensitive |
| GCACGGTAGAATAAGCGGACGGGC  | 0 | 13  | RDR2-sensitive |
| GCACGGTAGAATAAGCGGGCAGGC  | 0 | 10  | RDR2-sensitive |
| GCACGGTAGAATAAGCGGGCGGAC  | 1 | 22  | RDR2-sensitive |
| GCACGGTAGAATAAGCGGGCGGGC  | 3 | 346 | RDR2-sensitive |
| GCACGGTAGAATAAGCGGGCGGGG  | 1 | 15  | RDR2-sensitive |
| GCACGGTAGAATAAGCGGGCGGGT  | 0 | 38  | RDR2-sensitive |
| GCACGGTAGAATAAGTGGACGGGC  | 0 | 27  | RDR2-sensitive |
| GCACGGTAGAATAAGTGGGCGGGC  | 0 | 11  | RDR2-sensitive |
| GCACGGTAGATGAATGGACGGTAT  | 0 | 14  | RDR2-sensitive |
| GCACGGTCGGTTACGGGCCCGGGC  | 0 | 12  | RDR2-sensitive |
| GCACGGTCGTGACCCGGCATGAGC  | 0 | 9   | RDR2-sensitive |
| GCACGGTTAATTGGTAGGCACGGT  | 0 | 10  | RDR2-sensitive |
| GCACGTAGAGAGATTCTAGGACGG  | 0 | 12  | RDR2-sensitive |
| GCACGTAGATGGCAGAACCAGAGC  | 0 | 15  | RDR2-sensitive |
| GCACGTAGGACTGTGCAGGCCCGG  | 0 | 59  | RDR2-sensitive |
| GCACGTATCCGCATCGGACCATAT  | 0 | 18  | RDR2-sensitive |
| GCACGTATTTTCGTGCGCCACCAC  | 0 | 9   | RDR2-sensitive |
| GCACGTGAGAAGGTGACAACGGA   | 0 | 11  | RDR2-sensitive |
| GCACGTCGTCCGGATTTTAGCGGA  | 0 | 32  | RDR2-sensitive |
| GCACGTGCGGACTGTCCGGCCCCC  | 0 | 10  | RDR2-sensitive |
| GCACGTGGGAATGAGAATAGGCTT  | 1 | 20  | RDR2-sensitive |
| GCACGTGGGAATGGGAATAGGCTT  | 2 | 31  | RDR2-sensitive |
| GCACGTGGGCCTCTGAGCTGGACG  | 0 | 25  | RDR2-sensitive |
| GCACGTGGGCTCTCTAGGCATGGC  | 0 | 14  | RDR2-sensitive |
| GCACGTGTAGAACAGATTAGGGTT  | 0 | 11  | RDR2-sensitive |

|                           |     |     |                |
|---------------------------|-----|-----|----------------|
| GCACGTTTGGACATGTATAGGCGC  | 0   | 12  | RDR2-sensitive |
| GCACGTTTGGACCCGAAGCTCGGC  | 7   | 111 | RDR2-sensitive |
| GCACGTTTGGACCCGATGCTCGGC  | 1   | 41  | RDR2-sensitive |
| GCACTAACGGATCGTGCTTCGGAC  | 0   | 10  | RDR2-sensitive |
| GCACTAFACTGGACTAGAGCGCAA  | 0   | 16  | RDR2-sensitive |
| GCACTACGAGAAAGTCGGCTTTTA  | 3   | 23  | RDR2-sensitive |
| GCACTATATTGGACTGGGCCACGG  | 0   | 15  | RDR2-sensitive |
| GCACTCAGCCAGTCCAGTCTGAGC  | 0   | 15  | RDR2-sensitive |
| GCACTCGACTGGACTCGCGGCC    | 0   | 13  | RDR2-sensitive |
| GCACTCGCGTTAGGACGTGGCGTA  | 2   | 21  | RDR2-sensitive |
| GCACTCTAGCCGGGCTGGTGTCCG  | 0   | 24  | RDR2-sensitive |
| GCACTCTCGGGCCATACACGACAC  | 0   | 10  | RDR2-sensitive |
| GCACTGCATGGACGTGGAGATGGC  | 1   | 14  | RDR2-sensitive |
| GCACTGCATGTGGATCCTTGACA   | 106 | 18  | RDR2-resistant |
| GCACTGGAAGGGCATAGCTGAGAA  | 0   | 10  | RDR2-sensitive |
| GCACTGGAGCAGCAGGGGCGAGAG  | 0   | 15  | RDR2-sensitive |
| GCACTGTACTCGGCAAAGACCTGC  | 0   | 14  | RDR2-sensitive |
| GCACTGTAGACGACGGCCCAACAT  | 0   | 18  | RDR2-sensitive |
| GCACTGTAGATTACACCAGGGGCG  | 1   | 17  | RDR2-sensitive |
| GCACTGTAGACAATCCAGCAGAT   | 0   | 10  | RDR2-sensitive |
| GCACTGTAGCAGCGCTAGGGGGCA  | 0   | 13  | RDR2-sensitive |
| GCACTGTAGCGCATTGAATGCGGT  | 3   | 21  | RDR2-sensitive |
| GCACTGTAGGGATAGAAGATGCCT  | 1   | 17  | RDR2-sensitive |
| GCACTGTAGGGGCAACGGGACTA   | 0   | 10  | RDR2-sensitive |
| GCACTGTAGGTCGGCTTGCCTGCC  | 0   | 10  | RDR2-sensitive |
| GCACTGTGGAAGATTGCAGGAACG  | 0   | 12  | RDR2-sensitive |
| GCACTGTGGAGCGGGAGTTGCATA  | 0   | 34  | RDR2-sensitive |
| GCACTGTTAGGTACTGGACGGATG  | 0   | 32  | RDR2-sensitive |
| GCACTGTTCCGCTCTGTAGACTGC  | 0   | 18  | RDR2-sensitive |
| GCACTTCGGGCTGGCACGGCACGG  | 0   | 9   | RDR2-sensitive |
| GCACTTCGGGCTGGCACGGTACGG  | 0   | 33  | RDR2-sensitive |
| GCACTTTGGACTGGTACGGCACAG  | 0   | 12  | RDR2-sensitive |
| GCACTTTGGGCTAGCATGACACGG  | 0   | 21  | RDR2-sensitive |
| GCAGAACACGGAATGAGACAGCCT  | 0   | 14  | RDR2-sensitive |
| GCAGAACACGGCGCACATGTAGAC  | 0   | 10  | RDR2-sensitive |
| GCAGAACACGTCAGAGGCAGACTA  | 0   | 24  | RDR2-sensitive |
| GCAGAACAGCAGTTGGCAGAACAC  | 0   | 9   | RDR2-sensitive |
| GCAGAACATGTCAGAGGTAGGCTA  | 0   | 10  | RDR2-sensitive |
| GCAGAACCGTGCTGAATGTGGACG  | 0   | 86  | RDR2-sensitive |
| GCAGAACCTGACAGGGGAGGCTAG  | 0   | 13  | RDR2-sensitive |
| GCAGAACGAGTGGGCTGTTTTAG   | 0   | 15  | RDR2-sensitive |
| GCAGAACGGCAGAACAACACTGATG | 0   | 15  | RDR2-sensitive |
| GCAGAACGGCAGAACGGCAGAACC  | 0   | 11  | RDR2-sensitive |
| GCAGAACGGCAGAACGGCAGACTA  | 0   | 9   | RDR2-sensitive |
| GCAGAACGGCAGACTACTCTTACC  | 0   | 13  | RDR2-sensitive |
| GCAGAACGGTAGAACGGACGACTG  | 0   | 26  | RDR2-sensitive |
| GCAGAACGGTAGGCTACTTTTGGA  | 0   | 48  | RDR2-sensitive |
| GCAGAACTTTGCCAAGTGCGGCTT  | 0   | 9   | RDR2-sensitive |
| GCAGAACTTTGCCGAGGGCGGTAC  | 0   | 9   | RDR2-sensitive |

|                           |    |    |                |
|---------------------------|----|----|----------------|
| GCAGAAGACAGGGAACGTGACCAT  | 0  | 10 | RDR2-sensitive |
| GCAGAAGGGCTACTCGTGCATCAT  | 1  | 20 | RDR2-sensitive |
| GCAGAAGGGCTGCGTAGAGATCGG  | 0  | 14 | RDR2-sensitive |
| GCAGAAGGGGTAGAACAGGCCGAG  | 0  | 9  | RDR2-sensitive |
| GCAGAATACTGTCCAAGCTTCGGC  | 19 | 1  | RDR2-resistant |
| GCAGAATGCAGACAAGGGACGCAG  | 0  | 10 | RDR2-sensitive |
| GCAGACAGTAGAGGGCGTGATCAG  | 0  | 11 | RDR2-sensitive |
| GCAGACCAGCAAGAACGACGACGT  | 0  | 12 | RDR2-sensitive |
| GCAGACCGGTGACGTAGAGTGCAT  | 84 | 25 | RDR2-resistant |
| GCAGACCGTCTGGACCACCGGTGC  | 0  | 11 | RDR2-sensitive |
| GCAGACCGTTTGAGCCTACGCATG  | 0  | 14 | RDR2-sensitive |
| GCAGACCTCTGTACCAGGCGTAGT  | 0  | 15 | RDR2-sensitive |
| GCAGACGACGTACTCAGGGACGCA  | 0  | 9  | RDR2-sensitive |
| GCAGACGAGTAGATGGCGGACAAC  | 0  | 11 | RDR2-sensitive |
| GCAGACGCAAGGACGACAGAGCAG  | 0  | 12 | RDR2-sensitive |
| GCAGACGCAGATATGAACGCGCAA  | 0  | 23 | RDR2-sensitive |
| GCAGACGCTGGTATAGACATGGAT  | 1  | 16 | RDR2-sensitive |
| GCAGACGGCTGCAAAGTAGAATGT  | 0  | 10 | RDR2-sensitive |
| GCAGACTCAGAACGCTGTGCAGAA  | 0  | 36 | RDR2-sensitive |
| GCAGACTGCAGACAAGCAAAGCAA  | 0  | 10 | RDR2-sensitive |
| GCAGACTGCATACACGTCCACACG  | 0  | 13 | RDR2-sensitive |
| GCAGACTGGAACGATGTCCGGCGTC | 0  | 10 | RDR2-sensitive |
| GCAGACTGGGACCGGCTACATGCG  | 0  | 79 | RDR2-sensitive |
| GCAGACTGGGACCGGCTGCATGCA  | 0  | 9  | RDR2-sensitive |
| GCAGACTGTCTGTACCTATGGGGC  | 0  | 14 | RDR2-sensitive |
| GCAGACTGTGCAAGCGGAGCGTGA  | 0  | 9  | RDR2-sensitive |
| GCAGACTTGCTCGGCGGGAGACAT  | 0  | 9  | RDR2-sensitive |
| GCAGAGAAGGAGGTAGCAACAGAA  | 0  | 10 | RDR2-sensitive |
| GCAGAGACGACGGAGTTCGCTGAA  | 0  | 11 | RDR2-sensitive |
| GCAGAGACGTGTAGCAGTCGTGCG  | 0  | 34 | RDR2-sensitive |
| GCAGAGACTGATGGGCGCAATTCA  | 0  | 18 | RDR2-sensitive |
| GCAGAGAGCATCGCCAGACGGTAC  | 0  | 13 | RDR2-sensitive |
| GCAGAGAGGACGCCGATCGGAACA  | 0  | 12 | RDR2-sensitive |
| GCAGAGAGGATTGGAGCTGGCGGC  | 0  | 10 | RDR2-sensitive |
| GCAGAGCGCCGATACATGGAACAG  | 0  | 12 | RDR2-sensitive |
| GCAGAGCGCCGCTACATGGAACAG  | 0  | 9  | RDR2-sensitive |
| GCAGAGCGGCAAGTTAGAGCGACC  | 0  | 16 | RDR2-sensitive |
| GCAGAGCTCGGCACCATAGGCTAT  | 0  | 19 | RDR2-sensitive |
| GCAGAGGACATATCTGGTGCACAT  | 0  | 12 | RDR2-sensitive |
| GCAGAGGACCTGGTCGAGCGCTAC  | 0  | 21 | RDR2-sensitive |
| GCAGAGGACTCTGACAGCGAGCGT  | 0  | 10 | RDR2-sensitive |
| GCAGAGGAGGACCGACAACAATGA  | 0  | 22 | RDR2-sensitive |
| GCAGAGGATATGAGGGCGGAAGAA  | 0  | 29 | RDR2-sensitive |
| GCAGAGGATGACGGTTTCGACGAC  | 0  | 11 | RDR2-sensitive |
| GCAGAGGCCGGAAGTGACTTTCAA  | 0  | 12 | RDR2-sensitive |
| GCAGAGGCTACGGAACGCGCAGAA  | 0  | 26 | RDR2-sensitive |
| GCAGAGGGTTGCTGACGCTGACGG  | 0  | 19 | RDR2-sensitive |
| GCAGAGTCGAACGCAGAGACCACA  | 1  | 12 | RDR2-sensitive |
| GCAGAGTGAACGGAACAGAGCGTG  | 0  | 10 | RDR2-sensitive |

|                           |    |    |                |
|---------------------------|----|----|----------------|
| GCAGAGTGAACGGAACGGAGCGTG  | 5  | 21 | RDR2-sensitive |
| GCAGAGTGAACGGAACAGAGCGG   | 2  | 31 | RDR2-sensitive |
| GCAGAGTGGACAGTTGAACCGGTC  | 0  | 11 | RDR2-sensitive |
| GCAGAGTGGACAGTTGACGCCGAC  | 0  | 12 | RDR2-sensitive |
| GCAGAGTGGACAGTTGACGCCGGC  | 4  | 58 | RDR2-sensitive |
| GCAGAGTGTGGACCTGGGCACGGT  | 0  | 10 | RDR2-sensitive |
| GCAGAGTTCTGGATGTGTGACTGC  | 0  | 27 | RDR2-sensitive |
| GCAGATAGGCCGTGACCGACTGAA  | 0  | 9  | RDR2-sensitive |
| GCAGATATCGGGCCTGTTTGGTGT  | 0  | 41 | RDR2-sensitive |
| GCAGATCCCGGGAGAAGACGTCCG  | 0  | 13 | RDR2-sensitive |
| GCAGATCGAGCATAGAACCGGCAC  | 1  | 24 | RDR2-sensitive |
| GCAGATCGATAGAACAGACGACAA  | 0  | 9  | RDR2-sensitive |
| GCAGATCTGAACTCGCAGCAACGT  | 0  | 12 | RDR2-sensitive |
| GCAGATCTGATCCAGCAGCAACGT  | 0  | 9  | RDR2-sensitive |
| GCAGATCTGATCCCGCAGCAACGT  | 0  | 26 | RDR2-sensitive |
| GCAGATCTGATCTCGCAGCAACGT  | 1  | 17 | RDR2-sensitive |
| GCAGATCTGGGAGCCGTTGGCGCA  | 4  | 29 | RDR2-sensitive |
| GCAGATGAACGGACCTGGATGTGC  | 1  | 90 | RDR2-sensitive |
| GCAGATGACTAGCTACCTGACGAC  | 0  | 14 | RDR2-sensitive |
| GCAGATGACTGGCGGCTTCTCCGG  | 0  | 9  | RDR2-sensitive |
| GCAGATGAGGGATTTGATTGTGTG  | 16 | 0  | RDR2-resistant |
| GCAGATGATGTTGACGAGTACTGA  | 18 | 0  | RDR2-resistant |
| GCAGATGGACGGACCTGGATGCGT  | 0  | 68 | RDR2-sensitive |
| GCAGATGGACGGTGTAGATTGGCT  | 0  | 22 | RDR2-sensitive |
| GCAGATGGATGGACCTGGATGTGC  | 0  | 20 | RDR2-sensitive |
| GCAGATGGCGGACATTGCAGACGG  | 0  | 13 | RDR2-sensitive |
| GCAGATGTAGAGCACAAGGACGGT  | 0  | 45 | RDR2-sensitive |
| GCAGATGTAGTACAACGTGCGCAA  | 0  | 17 | RDR2-sensitive |
| GCAGATGTGGAGCATAAGGACGGT  | 0  | 17 | RDR2-sensitive |
| GCAGATTCACCGAAGGCAGAACCA  | 0  | 23 | RDR2-sensitive |
| GCAGATTCGTAGACGACATCCCGT  | 0  | 11 | RDR2-sensitive |
| GCAGATTGGCAGGAAGCAGAACGA  | 0  | 9  | RDR2-sensitive |
| GCAGATTGGCTGAAGGCAGAACCA  | 0  | 12 | RDR2-sensitive |
| GCAGATTGGCTGAAGGCAGAACGA  | 0  | 52 | RDR2-sensitive |
| GCAGATTGGTTCGCATCTCCAGAGC | 0  | 20 | RDR2-sensitive |
| GCAGATTTACTGGAGGCAGAACGC  | 0  | 18 | RDR2-sensitive |
| GCAGCAACGTTCGAGGTAGAGCGTG | 0  | 11 | RDR2-sensitive |
| GCAGCACACTCACTCGTCGGCTTA  | 2  | 48 | RDR2-sensitive |
| GCAGCACCGTTGGATGTGGAGGGT  | 0  | 42 | RDR2-sensitive |
| GCAGCAGAGCTCATGATCGTTCGAG | 0  | 10 | RDR2-sensitive |
| GCAGCAGCTCGGCTCGGCTCGGAC  | 0  | 33 | RDR2-sensitive |
| GCAGCAGTCGTTGGTGGAGGCAA   | 2  | 24 | RDR2-sensitive |
| GCAGCAGTCGTTTGGTGGAGGCAA  | 2  | 14 | RDR2-sensitive |
| GCAGCATCCAAGGACAGCCGGCGT  | 1  | 17 | RDR2-sensitive |
| GCAGCCAGACAGCCTCGGACGCA   | 0  | 11 | RDR2-sensitive |
| GCAGCCGACGGCACACAGAACTC   | 0  | 10 | RDR2-sensitive |
| GCAGCCGGACGAGTGAGAGACTGC  | 0  | 27 | RDR2-sensitive |
| GCAGCCGGATTGCAGCCGCAGCAA  | 1  | 85 | RDR2-sensitive |
| GCAGCCGGATTGTAGCCGCAGCAA  | 0  | 10 | RDR2-sensitive |

|                            |    |     |                |
|----------------------------|----|-----|----------------|
| GCAGCCTGATAGTCGGATCGGCCT   | 0  | 24  | RDR2-sensitive |
| GCAGCCTGCAGCAACGGACGGTAC   | 0  | 16  | RDR2-sensitive |
| GCAGCCTGGGGAACAGCCGACGTC   | 0  | 12  | RDR2-sensitive |
| GCAGCCTGTAGATTTGGTCGGCAA   | 0  | 11  | RDR2-sensitive |
| GCAGCGAAGGCTTCGAACGAAGGG   | 0  | 9   | RDR2-sensitive |
| GCAGCGACAATCTCACTCGTCGGT   | 0  | 26  | RDR2-sensitive |
| GCAGCGACAATTTACTCGTCGGTC   | 13 | 148 | RDR2-sensitive |
| GCAGCGACAATTTACTCGTCGGTT   | 0  | 10  | RDR2-sensitive |
| GCAGCGACGTACTCGGCACCGAAC   | 0  | 10  | RDR2-sensitive |
| GCAGCGATCTCAAGGACCCGGCCA   | 0  | 10  | RDR2-sensitive |
| GCAGCGATGGTAGGACCAGGCGAC   | 0  | 42  | RDR2-sensitive |
| GCAGCGCGACTGTTTTATAGGCCT   | 0  | 9   | RDR2-sensitive |
| GCAGCGCGGCAGAACATGGCACAC   | 0  | 16  | RDR2-sensitive |
| GCAGCGGCAATTTACTCGTCGGTC   | 0  | 9   | RDR2-sensitive |
| GCAGCGGCGCGGAATCCGGACGTC   | 1  | 63  | RDR2-sensitive |
| GCAGCGGCGTACTCTATACCACAC   | 0  | 13  | RDR2-sensitive |
| GCAGCGGCTTGGACTTGGACGGAA   | 0  | 26  | RDR2-sensitive |
| GCAGCGGGCAGACGAACAGGGCAA   | 0  | 10  | RDR2-sensitive |
| GCAGCGGGGCAGTAGGAGCGACGT   | 0  | 13  | RDR2-sensitive |
| GCAGCGGTGTAGAAGGCCTTCAAC   | 0  | 37  | RDR2-sensitive |
| GCAGCTAGACGCGTAAGGACCATT   | 2  | 26  | RDR2-sensitive |
| GCAGCTAGGAGCAGGGGAGAGCGG   | 26 | 0   | RDR2-resistant |
| GCAGCTCTGACGCAGGCACAACAC   | 0  | 18  | RDR2-sensitive |
| GCAGCTGTAGGAAGTTAGCGGCTC   | 0  | 15  | RDR2-sensitive |
| GCAGCTGTATGACTACAAGATGGT   | 0  | 22  | RDR2-sensitive |
| GCAGCTTTCTGTCTCGTCGGGTGCAC | 8  | 38  | RDR2-sensitive |
| GCAGCTTTTGCAGTCGTCTGGTCA   | 0  | 17  | RDR2-sensitive |
| GCAGGAACAGTAGACCAAGGCAGA   | 3  | 20  | RDR2-sensitive |
| GCAGGAACAGTAGACCCAGGCGGA   | 1  | 43  | RDR2-sensitive |
| GCAGGAACAGTAGACTCAGGCGGA   | 0  | 12  | RDR2-sensitive |
| GCAGGAACGGTAGATCGAGCAGAG   | 0  | 32  | RDR2-sensitive |
| GCAGGAAGATGTACGCTGTGCAGT   | 1  | 32  | RDR2-sensitive |
| GCAGGAATTGTGCAATCAAAACGG   | 0  | 14  | RDR2-sensitive |
| GCAGGACAACACGAAGGCCGCGGG   | 0  | 11  | RDR2-sensitive |
| GCAGGACAACAGGACTGCAGAAGA   | 0  | 22  | RDR2-sensitive |
| GCAGGACAACAGTAGCAGCACAAC   | 0  | 11  | RDR2-sensitive |
| GCAGGACAACCAGGACAGGGACGT   | 0  | 15  | RDR2-sensitive |
| GCAGGACAACGAGCGGCTGGGCGG   | 0  | 10  | RDR2-sensitive |
| GCAGGACAACGTCAGCAGGGACTC   | 1  | 16  | RDR2-sensitive |
| GCAGGACACATGTAGGTGGTCGTA   | 0  | 10  | RDR2-sensitive |
| GCAGGACACTCGGCACAGGAACAC   | 0  | 9   | RDR2-sensitive |
| GCAGGACACTCGGCACAGGACCAC   | 2  | 15  | RDR2-sensitive |
| GCAGGACAGCAGTAGCAGCAGCAGC  | 1  | 12  | RDR2-sensitive |
| GCAGGACCGCGTCGAAGAAGAAGT   | 0  | 10  | RDR2-sensitive |
| GCAGGACCTGATAGAGTGTAACGG   | 0  | 9   | RDR2-sensitive |
| GCAGGACCTTCAGCGACGAAGCAT   | 3  | 32  | RDR2-sensitive |
| GCAGGACCTTCGACGACGAAGCAT   | 0  | 53  | RDR2-sensitive |
| GCAGGACCTTCGGCGACGAAGCAT   | 0  | 31  | RDR2-sensitive |
| GCAGGACCTTTAGCGACGAAGCAT   | 0  | 10  | RDR2-sensitive |

|                           |    |     |                |
|---------------------------|----|-----|----------------|
| GCAGGACCTTTGGCGACGAAGCAT  | 0  | 14  | RDR2-sensitive |
| GCAGGACGAAAATTCAGGGGGCAA  | 0  | 12  | RDR2-sensitive |
| GCAGGACGACGACGACGACGACGC  | 0  | 10  | RDR2-sensitive |
| GCAGGACGATGGTAGAGACGACAA  | 0  | 23  | RDR2-sensitive |
| GCAGGACGGCTGACGGACGACGCA  | 1  | 16  | RDR2-sensitive |
| GCAGGACGTAAACCGGGAGCGGAC  | 0  | 10  | RDR2-sensitive |
| GCAGGACGTAACATGAGAGCGGGC  | 0  | 9   | RDR2-sensitive |
| GCAGGACGTAGCCCGGGAGCGGAC  | 0  | 13  | RDR2-sensitive |
| GCAGGACTAACGAAGGCAGAACGG  | 0  | 30  | RDR2-sensitive |
| GCAGGACTCTGCCGAGAGCGGCC   | 6  | 35  | RDR2-sensitive |
| GCAGGACTCTGCCGAGGGCGACAC  | 0  | 19  | RDR2-sensitive |
| GCAGGACTGACCGGCTGCATGAGG  | 88 | 0   | RDR2-resistant |
| GCAGGACTGCAAGGAGGACAGCGT  | 0  | 21  | RDR2-sensitive |
| GCAGGACTGCACTGTAGGGGGCAA  | 0  | 13  | RDR2-sensitive |
| GCAGGACTGCAGGAGGGCGGACGG  | 0  | 22  | RDR2-sensitive |
| GCAGGACTGCAGGCGACCAGGCGT  | 0  | 9   | RDR2-sensitive |
| GCAGGACTGTACCGAGTGCGGCGC  | 0  | 11  | RDR2-sensitive |
| GCAGGACTGTGCAGGCACGGCACG  | 0  | 29  | RDR2-sensitive |
| GCAGGACTGTGCAGGCACGGCCCG  | 0  | 22  | RDR2-sensitive |
| GCAGGACTGTGCAGGCCCGGCCCG  | 1  | 19  | RDR2-sensitive |
| GCAGGACTGTGTCGAGCGCGGCTC  | 0  | 11  | RDR2-sensitive |
| GCAGGACTTGAGTGCGCATATCTT  | 1  | 17  | RDR2-sensitive |
| GCAGGACTTTACCGAGGACGACAC  | 0  | 28  | RDR2-sensitive |
| GCAGGACTTTACCGAGTGCGGCTC  | 4  | 21  | RDR2-sensitive |
| GCAGGACTTTGACGAATGCGGCTC  | 0  | 11  | RDR2-sensitive |
| GCAGGACTTTGCCAAGTGCGGCTC  | 0  | 14  | RDR2-sensitive |
| GCAGGACTTTGTGCGAGGGCGACAC | 0  | 9   | RDR2-sensitive |
| GCAGGACTTTGTGCGAGTGCGGCGC | 1  | 15  | RDR2-sensitive |
| GCAGGACTTTGTGCGAGTGCGGCTC | 9  | 61  | RDR2-sensitive |
| GCAGGAGATGAATGATGTGATGTT  | 17 | 1   | RDR2-resistant |
| GCAGGAGCTAGGAACATGCAAGAC  | 0  | 14  | RDR2-sensitive |
| GCAGGAGCTGTGCCGAGGACGAAG  | 0  | 10  | RDR2-sensitive |
| GCAGGAGGACGTCAGCAAGGACTC  | 1  | 22  | RDR2-sensitive |
| GCAGGAGGCGAGAGCGGGACTGGA  | 0  | 9   | RDR2-sensitive |
| GCAGGATAGACGCAAGGACGGTAG  | 0  | 11  | RDR2-sensitive |
| GCAGGATATGACGGATGCGATCAT  | 0  | 16  | RDR2-sensitive |
| GCAGGATATGGAAGCGGCAGAACC  | 0  | 9   | RDR2-sensitive |
| GCAGGATCGGATAACTCCTCACGG  | 0  | 10  | RDR2-sensitive |
| GCAGGATCTAGAAGACGAAGGGTT  | 6  | 100 | RDR2-sensitive |
| GCAGGATGAACGCAGGAAGACTGG  | 0  | 9   | RDR2-sensitive |
| GCAGGATGGCAGAACGGCAGAACG  | 0  | 13  | RDR2-sensitive |
| GCAGGATTTTGCCGAGGACAGCAC  | 0  | 9   | RDR2-sensitive |
| GCAGGCACGACCTAGGACTGGCAT  | 1  | 14  | RDR2-sensitive |
| GCAGGCAGAGTGCATTGTTAGGCA  | 0  | 11  | RDR2-sensitive |
| GCAGGCAGCGTGGAACACGTGCGT  | 0  | 14  | RDR2-sensitive |
| GCAGGCATGCAGGACAGACGGCGC  | 2  | 21  | RDR2-sensitive |
| GCAGGCCCGATAGCATACTGACGA  | 0  | 16  | RDR2-sensitive |
| GCAGGCCGGTGATGTAGAGTGCAT  | 20 | 1   | RDR2-resistant |
| GCAGGCCTGGGTATTGAAGTCGGT  | 0  | 12  | RDR2-sensitive |

|                           |     |    |                |
|---------------------------|-----|----|----------------|
| GCAGGCGCAGAACAGATTAGGGTT  | 0   | 11 | RDR2-sensitive |
| GCAGGCTCGGGCTGGTACGGCTAC  | 1   | 17 | RDR2-sensitive |
| GCAGGCTGTGACGCATAATGCCCA  | 0   | 13 | RDR2-sensitive |
| GCAGGCTGTGTACGTGCTGTCGGA  | 0   | 9  | RDR2-sensitive |
| GCAGGGAAGGGCGTACTCGATCGT  | 1   | 19 | RDR2-sensitive |
| GCAGGGACAAGAGAGGACACCAAA  | 0   | 10 | RDR2-sensitive |
| GCAGGGACTTTTCATTTCGTCTGGC | 144 | 0  | RDR2-resistant |
| GCAGGGAGGGGGGAATGAGAAAGAC | 5   | 21 | RDR2-sensitive |
| GCAGGGATTGGGATCGCGCCGCGC  | 29  | 0  | RDR2-resistant |
| GCAGGGCAACACAGCGAAGGACAA  | 0   | 9  | RDR2-sensitive |
| GCAGGGCCATGGACGAAGACGCAG  | 0   | 28 | RDR2-sensitive |
| GCAGGGCGTAGCATATGGCTGGTT  | 0   | 9  | RDR2-sensitive |
| GCAGGGCTGTAGACAGGTCGTCAG  | 0   | 14 | RDR2-sensitive |
| GCAGGGGAACCTCATGGTCGTCGC  | 0   | 10 | RDR2-sensitive |
| GCAGGGGAGAGCGGGCTGGACAGC  | 230 | 37 | RDR2-resistant |
| GCAGGGGCATCTAAGCGACGCTGA  | 0   | 11 | RDR2-sensitive |
| GCAGGGGCGCGGAACGAAGGCAGA  | 0   | 9  | RDR2-sensitive |
| GCAGGGGCGGATATTAGGCCTGAG  | 0   | 11 | RDR2-sensitive |
| GCAGGGGCGTTAGCGCGGACTCAC  | 0   | 13 | RDR2-sensitive |
| GCAGGGTGGCATCAGATTCTGGCT  | 0   | 10 | RDR2-sensitive |
| GCAGGTAACCGATCATGGACTCAA  | 0   | 23 | RDR2-sensitive |
| GCAGGTACGACGGACATTCCGGCT  | 0   | 9  | RDR2-sensitive |
| GCAGGTACGCTACAGAACATGGTT  | 0   | 16 | RDR2-sensitive |
| GCAGGTATGGTAGACTGTCCGGCT  | 3   | 16 | RDR2-sensitive |
| GCAGGTCACGGCATGCAAACCTCTG | 0   | 9  | RDR2-sensitive |
| GCAGGTGCTCTGACGGACGCCAA   | 0   | 14 | RDR2-sensitive |
| GCAGGTGCGCACTCGGCAGTGATG  | 0   | 13 | RDR2-sensitive |
| GCAGGTGCGTATCGTTACATACAA  | 0   | 26 | RDR2-sensitive |
| GCAGGTGAACGGACGGACGAACGG  | 0   | 10 | RDR2-sensitive |
| GCAGGTGATCGGCTGAAGACGCGC  | 0   | 17 | RDR2-sensitive |
| GCAGGTGTAGATCACAGGGACGAT  | 0   | 9  | RDR2-sensitive |
| GCAGGTGTAGGAGTCTAAAGGCAT  | 0   | 17 | RDR2-sensitive |
| GCAGGTGTGGAACACAAGTACGGT  | 0   | 13 | RDR2-sensitive |
| GCAGGTGTGGAGCACAATAACGGT  | 0   | 9  | RDR2-sensitive |
| GCAGGTGTGGAGCACAGGAACGGT  | 0   | 17 | RDR2-sensitive |
| GCAGGTGTGGAGCACTGGGACGGT  | 0   | 13 | RDR2-sensitive |
| GCAGGTGTGGAGCATAGGGACGGT  | 0   | 14 | RDR2-sensitive |
| GCAGGTGTGGAGCATATGGACGGT  | 1   | 15 | RDR2-sensitive |
| GCAGGTTATAGTCGGGTTAGGCCA  | 0   | 17 | RDR2-sensitive |
| GCAGGTTGGAGACTGTTGGCGGCT  | 0   | 12 | RDR2-sensitive |
| GCAGTAAAGGTAGTCGTTTAGGAC  | 0   | 11 | RDR2-sensitive |
| GCAGTACAAGATCGTCCCGGAGAC  | 0   | 11 | RDR2-sensitive |
| GCAGTACGTCAGAGGAACCGGCTC  | 1   | 47 | RDR2-sensitive |
| GCAGTAGAAGTCGGTACGGATCAA  | 0   | 17 | RDR2-sensitive |
| GCAGTAGATCGGGACGGCAGACAA  | 1   | 17 | RDR2-sensitive |
| GCAGTAGATTGTGTTATAACTTGT  | 0   | 9  | RDR2-sensitive |
| GCAGTAGTTTGGACCGAGCGGCTC  | 0   | 24 | RDR2-sensitive |
| GCAGTATGACTGGATCACACGGAC  | 0   | 21 | RDR2-sensitive |
| GCAGTATGCCACCGATATCGTCGA  | 0   | 9  | RDR2-sensitive |



|                           |     |    |                |
|---------------------------|-----|----|----------------|
| GCAGTCCCTCGAACGGTCGCCGGG  | 0   | 18 | RDR2-sensitive |
| GCAGTCCCTTGAACGGTCGCCGGA  | 0   | 11 | RDR2-sensitive |
| GCAGTCGGCAGTAGAGTTCTCGGC  | 0   | 29 | RDR2-sensitive |
| GCAGTCTATAATGTAGAACGGTGT  | 0   | 19 | RDR2-sensitive |
| GCAGTCTCTCGAACGGTCGTCATA  | 1   | 15 | RDR2-sensitive |
| GCAGTCTGGCTGAGCGGATGCAAA  | 0   | 15 | RDR2-sensitive |
| GCAGTGACGGCTCTCTGGCGTCGA  | 0   | 11 | RDR2-sensitive |
| GCAGTGACTGTACAACGCTAGGCA  | 0   | 18 | RDR2-sensitive |
| GCAGTGAGGACGGAACGGGAATGA  | 0   | 11 | RDR2-sensitive |
| GCAGTGATTGGCGCTCGGATCGGC  | 0   | 21 | RDR2-sensitive |
| GCAGTGCACGGAGACGACGAACAA  | 0   | 11 | RDR2-sensitive |
| GCAGTGCATGCGGAACTTGTTCCGG | 1   | 45 | RDR2-sensitive |
| GCAGTGTAGGACGGAGTTGAGGCC  | 0   | 12 | RDR2-sensitive |
| GCAGTGTGTTTGGACGGCTGACCA  | 0   | 15 | RDR2-sensitive |
| GCAGTTACTGGGACTAGGACGCAT  | 0   | 16 | RDR2-sensitive |
| GCAGTTTTGGACCCTTAGCTCGGC  | 3   | 53 | RDR2-sensitive |
| GCAGTTTTGGACCCTTTGCTCGGC  | 3   | 41 | RDR2-sensitive |
| GCAGTTTTCTAGGCTGGTCCGGAC  | 3   | 65 | RDR2-sensitive |
| GCATAAATTTTAGTATCGCCGGGG  | 16  | 0  | RDR2-resistant |
| GCATAAGAGTGGAACGAGGGCGTC  | 0   | 10 | RDR2-sensitive |
| GCATAATTTCCGGGCTGGTCCGGTC | 0   | 12 | RDR2-sensitive |
| GCATACAACCGGACTGTGTCCGGAC | 0   | 17 | RDR2-sensitive |
| GCATACACAAGTGTGACTCGTCGA  | 0   | 14 | RDR2-sensitive |
| GCATACACGCGGGTCGTCTGGTTC  | 0   | 10 | RDR2-sensitive |
| GCATACAGAGTGGACGGTGGGTTA  | 0   | 9  | RDR2-sensitive |
| GCATACCATGGCGATCTGTTCCGGG | 0   | 11 | RDR2-sensitive |
| GCATACGATGGCTCAGGACTACAT  | 0   | 15 | RDR2-sensitive |
| GCATACGGAAGGCACGATGAACGC  | 0   | 57 | RDR2-sensitive |
| GCATACGTGTGATCTAGACTGCAT  | 0   | 21 | RDR2-sensitive |
| GCATAGAACACCCTGGACGGCAG   | 0   | 12 | RDR2-sensitive |
| GCATAGAACCAGGTCGTGTCGGGC  | 0   | 12 | RDR2-sensitive |
| GCATAGATTGTAGATGGCAGCTCC  | 0   | 9  | RDR2-sensitive |
| GCATAGCCCTCCCTCTGAAATGGA  | 0   | 12 | RDR2-sensitive |
| GCATAGGACTGGGGAAAACGGCG   | 3   | 21 | RDR2-sensitive |
| GCATAGTAGGACACTCGGCATAGA  | 0   | 17 | RDR2-sensitive |
| GCATATGATGGCTTTACTACTCGC  | 290 | 13 | RDR2-resistant |
| GCATATGGATGACTGTGCCTGCAT  | 0   | 15 | RDR2-sensitive |
| GCATATTTACGACGGCCGTTGGAT  | 0   | 13 | RDR2-sensitive |
| GCATCAAGCAGAGGATCGTGGGCT  | 0   | 9  | RDR2-sensitive |
| GCATCAGACGGTGGAGAGCAACAC  | 0   | 9  | RDR2-sensitive |
| GCATCCACGGTAGAAGAGGACGAC  | 0   | 10 | RDR2-sensitive |
| GCATCCATGTCCGATTCCATGGCG  | 1   | 17 | RDR2-sensitive |
| GCATCCGGACTCCGATTGCGACGG  | 0   | 16 | RDR2-sensitive |
| GCATCCTGTACGACGGCGGTGGCC  | 28  | 0  | RDR2-resistant |
| GCATCCTTCGGTTGTCTGGCACAC  | 0   | 10 | RDR2-sensitive |
| GCATCGACTGCGTACGACTACATC  | 2   | 18 | RDR2-sensitive |
| GCATCGGATCGTGATCACACGGCT  | 0   | 10 | RDR2-sensitive |
| GCATCGGGCTGTGCCGGTTCGGGT  | 0   | 10 | RDR2-sensitive |
| GCATCTCCCGTCAGGACTCGGCCT  | 3   | 41 | RDR2-sensitive |

|                           |    |    |                |
|---------------------------|----|----|----------------|
| GCATCTGACTGCATCGACTGCATA  | 3  | 47 | RDR2-sensitive |
| GCATCTGAGCATGTAGACGCCACC  | 0  | 13 | RDR2-sensitive |
| GCATCTGTGGAGCCAGGCTCACGC  | 0  | 30 | RDR2-sensitive |
| GCATCTTCGGACTCAAGTCGGTAT  | 0  | 31 | RDR2-sensitive |
| GCATCTTGGACGTACACGGCGAAT  | 0  | 17 | RDR2-sensitive |
| GCATCTTGGACGTATACGCCGAAT  | 0  | 13 | RDR2-sensitive |
| GCATGACACGTTAGACGGCCTGGA  | 0  | 11 | RDR2-sensitive |
| GCATGACGTAAGTGAACCGCCGGC  | 0  | 11 | RDR2-sensitive |
| GCATGAGCCAGAGCCGAAGCTGAA  | 0  | 16 | RDR2-sensitive |
| GCATGAGCCTGACTGAGATGAGCC  | 0  | 11 | RDR2-sensitive |
| GCATGAGGACGTGCAGTACTGCGG  | 0  | 16 | RDR2-sensitive |
| GCATGAGGCAGGAAGTGCATTACT  | 38 | 2  | RDR2-resistant |
| GCATGATAGACAGGCTCTCGACAA  | 0  | 36 | RDR2-sensitive |
| GCATGATTCACGCAGGGACGGTAG  | 0  | 14 | RDR2-sensitive |
| GCATGCAAGGACGGAGCGAAGACA  | 0  | 17 | RDR2-sensitive |
| GCATGCAAGGTAGGTCGCGGACAC  | 0  | 9  | RDR2-sensitive |
| GCATGCAGATGTAGAGCGAGGCTT  | 0  | 9  | RDR2-sensitive |
| GCATGCGGCAGAACGGCAGAACGG  | 0  | 13 | RDR2-sensitive |
| GCATGCGGCTGACATGAATATGGC  | 0  | 27 | RDR2-sensitive |
| GCATGCGGGCACGTAGCGTTGCAT  | 0  | 9  | RDR2-sensitive |
| GCATGCGTAGAGACACGAGAACGG  | 0  | 10 | RDR2-sensitive |
| GCATGCGTAGAGACGTGGGGACGA  | 0  | 10 | RDR2-sensitive |
| GCATGCGTCGAGCAGGAACGACAC  | 0  | 11 | RDR2-sensitive |
| GCATGCGTCGCTGTGTTTCGGCAAG | 0  | 9  | RDR2-sensitive |
| GCATGGAACCTGTACGACGCGGCC  | 0  | 12 | RDR2-sensitive |
| GCATGGACACAAGCTGACGACGAC  | 0  | 15 | RDR2-sensitive |
| GCATGGACGAGCAGACACGACACA  | 0  | 38 | RDR2-sensitive |
| GCATGGACGTTAGTCACGGACGGT  | 0  | 13 | RDR2-sensitive |
| GCATGGACTATCAGCGAAGGGTAC  | 0  | 40 | RDR2-sensitive |
| GCATGGACTGCGGCAGTGCTCCGG  | 0  | 9  | RDR2-sensitive |
| GCATGGGCTGTGCTACAGAGGCAT  | 0  | 18 | RDR2-sensitive |
| GCATGGTAGAGGAGGCAGTAGAGT  | 0  | 22 | RDR2-sensitive |
| GCATGGTGTAGCAAGTGTGGACGC  | 0  | 9  | RDR2-sensitive |
| GCATGGTTCGTGGGTCTGGGCCGG  | 0  | 15 | RDR2-sensitive |
| GCATGTACAGTGGAGAGACACCAA  | 0  | 9  | RDR2-sensitive |
| GCATGTACGCGAGGAACGATGGCT  | 0  | 12 | RDR2-sensitive |
| GCATGTAGTCTTGAGGGCGTCCGG  | 0  | 9  | RDR2-sensitive |
| GCATGTCCGGCATCCTAGATAAA   | 0  | 47 | RDR2-sensitive |
| GCATGTCCGTAGGCACGGTTCGT   | 0  | 10 | RDR2-sensitive |
| GCATGTCGCACTGGCGTTCGGAG   | 0  | 12 | RDR2-sensitive |
| GCATGTCGCGTAGGACAGTTCGGC  | 2  | 27 | RDR2-sensitive |
| GCATGTCGTGCGCCCGCCCTTC    | 0  | 12 | RDR2-sensitive |
| GCATGTGAAGTAGAGCAACGGGAA  | 0  | 12 | RDR2-sensitive |
| GCATGTGTTGGTCGCGGTATTCGC  | 0  | 9  | RDR2-sensitive |
| GCATGTTGACGGTGGTCCAGAACT  | 36 | 0  | RDR2-resistant |
| GCATGTTGGTACAGGACGTGGCTA  | 0  | 9  | RDR2-sensitive |
| GCATGTTTGGACAGGCGTCTACAA  | 0  | 9  | RDR2-sensitive |
| GCATTAGACGAGCTGAGTAGGGCT  | 0  | 9  | RDR2-sensitive |
| GCATTCCGGGCTCTAGACGGTGTG  | 1  | 21 | RDR2-sensitive |

|                            |    |    |                |
|----------------------------|----|----|----------------|
| GCATTTCGAGGCGGATTAAGGCATC  | 33 | 4  | RDR2-resistant |
| GCATTTCGACTGTAGTAACGGGTA   | 0  | 10 | RDR2-sensitive |
| GCATTTCGACTGTCTTGGGCCAAG   | 0  | 11 | RDR2-sensitive |
| GCATTTCGTTGGACCGTGCCGGCCC  | 0  | 17 | RDR2-sensitive |
| GCATTGGACGAACGTTTTTGGCAT   | 2  | 14 | RDR2-sensitive |
| GCATTGTAGTTTTGGACGAGCGGT   | 50 | 0  | RDR2-resistant |
| GCATTTAGGACCTGACGACGACAT   | 0  | 47 | RDR2-sensitive |
| GCATTTATGTTGATTTGGACGGTT   | 0  | 10 | RDR2-sensitive |
| GCCAAAACACTGGATGTAGGGACGTT | 0  | 9  | RDR2-sensitive |
| GCCAAACAGGAGGGCTAGAGCCAG   | 1  | 53 | RDR2-sensitive |
| GCCAAACGCGGAATAGAACGGCTC   | 1  | 82 | RDR2-sensitive |
| GCCAACACGGACGAGAACGGGCGT   | 0  | 18 | RDR2-sensitive |
| GCCAACATGTGCGGACTGTCCGGC   | 0  | 11 | RDR2-sensitive |
| GCCAACCGACTGGAGCAGGAGCAC   | 0  | 11 | RDR2-sensitive |
| GCCAACCTCGGACGGGAGACGCAG   | 0  | 18 | RDR2-sensitive |
| GCCAACCTCGGACGGGAGACGTAG   | 0  | 27 | RDR2-sensitive |
| GCCAACGGTCGGCCGGGCCAACGG   | 5  | 21 | RDR2-sensitive |
| GCCAACGGTCGGTCGGGCCAACGG   | 3  | 16 | RDR2-sensitive |
| GCCAAGAGAGAAGCGTGCCTGGA    | 0  | 24 | RDR2-sensitive |
| GCCAAGCGGAGATAGGGTGAACAC   | 0  | 9  | RDR2-sensitive |
| GCCAAGTCAGCGTGAACAGTACGG   | 1  | 34 | RDR2-sensitive |
| GCCAATAGATCTCGGACTCGAGGC   | 0  | 10 | RDR2-sensitive |
| GCCAATCACGGACGACAAGGATGG   | 0  | 28 | RDR2-sensitive |
| GCCAATTTAGTCGGGCTAAGGCAC   | 0  | 9  | RDR2-sensitive |
| GCCACAAAGCTGACTGGGAGACGC   | 0  | 23 | RDR2-sensitive |
| GCCACAACCTCTGGCCCAGACACGT  | 0  | 9  | RDR2-sensitive |
| GCCACACAAGACGGATATAGACGA   | 0  | 14 | RDR2-sensitive |
| GCCACACGCTGGACTGTCCGGTAC   | 0  | 11 | RDR2-sensitive |
| GCCACACGTAGAGCCGCAGGGACA   | 0  | 9  | RDR2-sensitive |
| GCCACACGTTGGACTGTCCGGTGC   | 0  | 10 | RDR2-sensitive |
| GCCACACGTTGGACTGTTCGGTGC   | 0  | 32 | RDR2-sensitive |
| GCCACAGGACTGAGGATGGACGGT   | 0  | 11 | RDR2-sensitive |
| GCCACCACCGCGGACAGTCCGGAC   | 6  | 34 | RDR2-sensitive |
| GCCACCACCGCGGACAGTTCGGAC   | 1  | 34 | RDR2-sensitive |
| GCCACCACCGTGGACTGTCCGGAC   | 1  | 13 | RDR2-sensitive |
| GCCACCAGTGTGGACTGTCCGGAC   | 0  | 63 | RDR2-sensitive |
| GCCACCCAAGACGGATCTAGACGA   | 0  | 25 | RDR2-sensitive |
| GCCACCCGTGCAGGTCGTTAGGTC   | 0  | 10 | RDR2-sensitive |
| GCCACCTCGTCGACTGGTCGTCGT   | 0  | 15 | RDR2-sensitive |
| GCCACCTTCCTTGGATCGCGCGGA   | 0  | 11 | RDR2-sensitive |
| GCCACGGCAGAGCTCGGCACCATA   | 0  | 15 | RDR2-sensitive |
| GCCACGGGTCGGTGCGAGACAGGC   | 1  | 14 | RDR2-sensitive |
| GCCACGTGGAGCTCGAAGGTGGAT   | 0  | 9  | RDR2-sensitive |
| GCCACTAGAAATAGCACAGTCGGT   | 0  | 12 | RDR2-sensitive |
| GCCACTCTGACCTGATGGACGATT   | 0  | 17 | RDR2-sensitive |
| GCCACTGAACTCGAAGACGAACGT   | 0  | 16 | RDR2-sensitive |
| GCCACTGTAGACGAGAGGAAGCCG   | 0  | 9  | RDR2-sensitive |
| GCCACTGTATGGAAGAATTTGGTG   | 42 | 1  | RDR2-resistant |
| GCCACTTCTGTGCGTAGATCGCGG   | 0  | 19 | RDR2-sensitive |

|                             |    |     |                |
|-----------------------------|----|-----|----------------|
| GCCACTTGTTTGAACGTGGGTCCG    | 0  | 9   | RDR2-sensitive |
| GCCAGAAAGCTGACTGGGAGACGC    | 0  | 14  | RDR2-sensitive |
| GCCAGACCGCGGACCGTTCCGGCAC   | 0  | 23  | RDR2-sensitive |
| GCCAGACGGATGGTAGAAAGGGTT    | 0  | 38  | RDR2-sensitive |
| GCCAGACTCTGCAGACGCAAGTAA    | 0  | 12  | RDR2-sensitive |
| GCCAGACTGCTGACTGTACGGCTG    | 0  | 21  | RDR2-sensitive |
| GCCAGACTGCTGGACCATGGCGGC    | 0  | 10  | RDR2-sensitive |
| GCCAGACTGTGTGCATGGCTGCAT    | 0  | 10  | RDR2-sensitive |
| GCCAGAGCTCTGCAGCAATGCCGC    | 0  | 17  | RDR2-sensitive |
| GCCAGATACGGAAGGCGACTCCAA    | 19 | 0   | RDR2-resistant |
| GCCAGATCACGGACCATTCGGCTC    | 0  | 9   | RDR2-sensitive |
| GCCAGGACAAAGGATGGTTCGTC     | 0  | 9   | RDR2-sensitive |
| GCCAGGACGTAGAGTGTACGCAT     | 0  | 26  | RDR2-sensitive |
| GCCAGGACGTAGGATGTTACGCAT    | 1  | 16  | RDR2-sensitive |
| GCCAGGACGTAGGGTGTACGCAT     | 2  | 143 | RDR2-sensitive |
| GCCAGGACTGGAGTTCGTCCGGCAC   | 0  | 10  | RDR2-sensitive |
| GCCAGGCACTGACACTATACTGAC    | 1  | 12  | RDR2-sensitive |
| GCCAGGCACTGTTAGAAAACCGGT    | 0  | 19  | RDR2-sensitive |
| GCCAGGCCTGGACGGCTACTGTAG    | 0  | 9   | RDR2-sensitive |
| GCCAGGCTAGAGAATGCGTCACGG    | 0  | 17  | RDR2-sensitive |
| GCCAGGGACCTGCCGACTTGACGG    | 0  | 17  | RDR2-sensitive |
| GCCAGGTCGCGGACGGTCCGGCCA    | 46 | 11  | RDR2-resistant |
| GCCAGGTCGTGGACTCTTCGGTAC    | 0  | 60  | RDR2-sensitive |
| GCCAGGTGTTAGCGACTCGGTGGA    | 0  | 20  | RDR2-sensitive |
| GCCAGGTTCCGATCTGGATCCGAC    | 0  | 10  | RDR2-sensitive |
| GCCAGGTTGAAGAGGCTGATCAGG    | 0  | 19  | RDR2-sensitive |
| GCCAGTACAGTAGACATTCGGCAA    | 0  | 41  | RDR2-sensitive |
| GCCAGTATGACATCGGACCCACAA    | 0  | 12  | RDR2-sensitive |
| GCCAGTATGCCATCGGACACACAA    | 0  | 27  | RDR2-sensitive |
| GCCAGTATGCCATCGGACCCACAA    | 0  | 49  | RDR2-sensitive |
| GCCAGTATGCCATCGGACTCATAA    | 0  | 15  | RDR2-sensitive |
| GCCAGTATGCTATCGGACTCACAA    | 0  | 17  | RDR2-sensitive |
| GCCAGTCCGTACTIONCGGCAAAGAAA | 3  | 52  | RDR2-sensitive |
| GCCATAAAGCTGACTGGGAGACGC    | 0  | 10  | RDR2-sensitive |
| GCCATAAGTCGGCCAGCTGAAGGA    | 0  | 12  | RDR2-sensitive |
| GCCATACCGTGACTGAGACGTGAT    | 0  | 21  | RDR2-sensitive |
| GCCATCAAGCTGACTGGGAGACGC    | 0  | 9   | RDR2-sensitive |
| GCCATCAGGTGCGGACTGTCCGGC    | 0  | 9   | RDR2-sensitive |
| GCCATCGCAGGTCGTTTGTTCGTA    | 0  | 10  | RDR2-sensitive |
| GCCATCGGGCTGCATTCAGGCGAA    | 0  | 15  | RDR2-sensitive |
| GCCATGACGGACGCAGAGGATCGA    | 0  | 14  | RDR2-sensitive |
| GCCATGAGGAGATGAGCATCTGAC    | 79 | 0   | RDR2-resistant |
| GCCATGAGTCGGCCAGCTGAAGGA    | 0  | 20  | RDR2-sensitive |
| GCCATGCTCGGACGAGGCCGAGAT    | 0  | 14  | RDR2-sensitive |
| GCCCAAACAGGTTGTCCGGTGC      | 0  | 10  | RDR2-sensitive |
| GCCCACAGACTTAGAATACGGTTC    | 0  | 34  | RDR2-sensitive |
| GCCCACAGGCGCGGACTGTCCGGA    | 1  | 23  | RDR2-sensitive |
| GCCCACCCGTTGGTTCGAAGTCTGA   | 0  | 10  | RDR2-sensitive |
| GCCCACCTGTAAGAGCGTCCGACGG   | 0  | 14  | RDR2-sensitive |

|                           |     |     |                |
|---------------------------|-----|-----|----------------|
| GCCCACGGCTGCGAGCAGAACGAC  | 0   | 17  | RDR2-sensitive |
| GCCCCTCAGGACCACTGAACCGG   | 0   | 35  | RDR2-sensitive |
| GCCCCTGACCAGCAGGACTCGGC   | 0   | 15  | RDR2-sensitive |
| GCCCAGACGGCAGGCTAGGCCTGT  | 0   | 12  | RDR2-sensitive |
| GCCCAGCTGTAGCAATGGGATGGT  | 0   | 43  | RDR2-sensitive |
| GCCCAGTCGGCGGCATCCTCCCAC  | 30  | 2   | RDR2-resistant |
| GCCCATGGGGTGACGCCGAAAGG   | 338 | 0   | RDR2-resistant |
| GCCCCAGAAGACGACGAACCTCCGC | 0   | 9   | RDR2-sensitive |
| GCCCCCGGATGCAGGACACACGGT  | 0   | 11  | RDR2-sensitive |
| GCCCCGCACGACTGTGGACCAGGC  | 0   | 11  | RDR2-sensitive |
| GCCCCGCTGTAGATCTGGTCGGCA  | 0   | 19  | RDR2-sensitive |
| GCCCCGGAAGACGGCGAACTCCGA  | 0   | 20  | RDR2-sensitive |
| GCCCCGGAAGACGGCGAACTCCGC  | 22  | 130 | RDR2-sensitive |
| GCCCCGGACGTATGCAGTAGGCGT  | 0   | 14  | RDR2-sensitive |
| GCCCCGGACGTATGCAGTAGGTGT  | 1   | 21  | RDR2-sensitive |
| GCCCCGGGACTGTGTCCGAGCGGT  | 2   | 36  | RDR2-sensitive |
| GCCCCTACAGCTAGGTCGCGGACC  | 0   | 16  | RDR2-sensitive |
| GCCCCTGAATCCTGATCGTCTGAT  | 0   | 15  | RDR2-sensitive |
| GCCCCTGTAGATCAACGGCTGAAA  | 1   | 90  | RDR2-sensitive |
| GCCCCTGTTTGGATGGTTGGTCGG  | 0   | 13  | RDR2-sensitive |
| GCCCCTTAGGGAGAGATCTTAGGA  | 0   | 9   | RDR2-sensitive |
| GCCCCGAACCAACAGTAGAACGGTA | 0   | 11  | RDR2-sensitive |
| GCCCCGAATTGTAGTCTGGAGAGGC | 35  | 72  | RDR2-sensitive |
| GCCCCGACCTAGAGCACGACGCCAT | 0   | 10  | RDR2-sensitive |
| GCCCCGACTGCCGAAAATACGACAT | 0   | 15  | RDR2-sensitive |
| GCCCCGAGATGTAGGTCGACGACGG | 0   | 10  | RDR2-sensitive |
| GCCCCGAGTACCTGTAGAGACGCAT | 0   | 11  | RDR2-sensitive |
| GCCCCGCACTGTTAGGAGCCGGCGT | 0   | 10  | RDR2-sensitive |
| GCCCCGCGACAGTAGATCGGACGGT | 0   | 14  | RDR2-sensitive |
| GCCCCGCTTATTCTACCGTGCCGGG | 0   | 28  | RDR2-sensitive |
| GCCCCGACTGCGTGCTGCATGGCT  | 0   | 9   | RDR2-sensitive |
| GCCCCGACTGCGTGTTGCATGGCT  | 0   | 9   | RDR2-sensitive |
| GCCCCGGCACAGTAGAATAAGCGGA | 2   | 119 | RDR2-sensitive |
| GCCCCGGCACGATCTAGACATGGAC | 1   | 21  | RDR2-sensitive |
| GCCCCGGCACGGTAGAATAAACGGG | 1   | 68  | RDR2-sensitive |
| GCCCCGGCACGGTAGAATAAGCGGA | 0   | 40  | RDR2-sensitive |
| GCCCCGGCACGGTAGAATAAGCGGG | 11  | 469 | RDR2-sensitive |
| GCCCCGGCACGGTAGAATAAGCGGT | 0   | 10  | RDR2-sensitive |
| GCCCCGGCACGGTAGAATAAGTGGA | 0   | 10  | RDR2-sensitive |
| GCCCCGGCTATGGAGAATGCGACGG | 0   | 9   | RDR2-sensitive |
| GCCCCGGCTGTAGGGATGGTGCCGC | 0   | 19  | RDR2-sensitive |
| GCCCCGGCTGTATGAGTCAGGTCGG | 0   | 9   | RDR2-sensitive |
| GCCCCGGTCCAATGGACTTAGACGG | 0   | 11  | RDR2-sensitive |
| GCCCCGTAGATCTCGAGCAAGGCAG | 1   | 17  | RDR2-sensitive |
| GCCCCGTGGCGTAGACGCGAGACGC | 0   | 30  | RDR2-sensitive |
| GCCCCGTGTCGGCACTGTAGGTCGG | 0   | 46  | RDR2-sensitive |
| GCCCCGTTTGGCCTGTGGCACGGCA | 0   | 14  | RDR2-sensitive |
| GCCCCTAATCGGACTTATGCCGGGT | 0   | 11  | RDR2-sensitive |
| GCCCCTACGGACGAGCTCCGGCATG | 0   | 10  | RDR2-sensitive |

|                           |     |    |                |
|---------------------------|-----|----|----------------|
| GCCCTACTGTAGACGGTCAGACAC  | 0   | 9  | RDR2-sensitive |
| GCCCTACTGTAGACGGTCAGTGTC  | 1   | 30 | RDR2-sensitive |
| GCCCTCAGCTCGGATCGCGGGAT   | 0   | 9  | RDR2-sensitive |
| GCCCTCCAATTGAGTCGTCGGAGC  | 0   | 10 | RDR2-sensitive |
| GCCCTCTCGGAACCGGATGACTGC  | 0   | 18 | RDR2-sensitive |
| GCCCTCTGGTCAGGCGCGGACGGT  | 0   | 10 | RDR2-sensitive |
| GCCCTCTGTAAGCTGAATGCGTCC  | 0   | 10 | RDR2-sensitive |
| GCCCTCTGTAAGCTGAATGCGTCT  | 0   | 9  | RDR2-sensitive |
| GCCCTGAGGGTGGACTGTTCCGCGG | 0   | 16 | RDR2-sensitive |
| GCCCTGAGGTCGGACGGTCCGCGG  | 0   | 15 | RDR2-sensitive |
| GCCCTGGACATGCAAGTGAACGAA  | 0   | 9  | RDR2-sensitive |
| GCCCTGGCTGATCTGATACGGCAT  | 0   | 14 | RDR2-sensitive |
| GCCCTGGGGAACGACGACGGTAGC  | 0   | 10 | RDR2-sensitive |
| GCCCTGTAGAAGCACAGCTGTCCG  | 1   | 56 | RDR2-sensitive |
| GCCCTGTAGAAGCGCAGCTGGCGT  | 0   | 25 | RDR2-sensitive |
| GCCCTGTAGAAGCGTAGCTGACGG  | 0   | 14 | RDR2-sensitive |
| GCCCTGTGTCGTCGACGTTGGTG   | 0   | 10 | RDR2-sensitive |
| GCCCTTAAAGGCGTGACTCGGGCA  | 1   | 40 | RDR2-sensitive |
| GCCCTTAGCCCCAAGAGCGTCCGT  | 110 | 26 | RDR2-resistant |
| GCCCTTGCGTAGGATTTCCGCGT   | 0   | 36 | RDR2-sensitive |
| GCCGAAATCGGACGGGAACCGGTA  | 0   | 29 | RDR2-sensitive |
| GCCGAACCGGGAGCAGAACGCCCT  | 0   | 12 | RDR2-sensitive |
| GCCGAAGAAGGACACGACGAAGAC  | 0   | 15 | RDR2-sensitive |
| GCCGAAGACGTCTCTGCATGTTGT  | 0   | 10 | RDR2-sensitive |
| GCCGAAGACTGAAAGTAGGGACGT  | 0   | 47 | RDR2-sensitive |
| GCCGAAGACTGGATGTAGAGACGT  | 0   | 16 | RDR2-sensitive |
| GCCGAAGACTGGATGTAGGGACGT  | 0   | 13 | RDR2-sensitive |
| GCCGAAGATGTACGATGATGAGGA  | 47  | 1  | RDR2-resistant |
| GCCGAATACTGGATGTAGGGACGT  | 3   | 26 | RDR2-sensitive |
| GCCGAATTGGTTCTGTTGGGCTGC  | 0   | 9  | RDR2-sensitive |
| GCCGACACGTAGGGGGCGCTGTAG  | 0   | 15 | RDR2-sensitive |
| GCCGACACGTCCGTGTTCTCGGAC  | 0   | 18 | RDR2-sensitive |
| GCCGACCAACCCTCTGGCAAGCAG  | 0   | 12 | RDR2-sensitive |
| GCCGACCGTTGCAGATCTGGCGCA  | 0   | 10 | RDR2-sensitive |
| GCCGACCGTTGGCTCACCGGACAG  | 1   | 12 | RDR2-sensitive |
| GCCGACGACTGCACGGCACTGCTC  | 39  | 8  | RDR2-resistant |
| GCCGACGATCTGACGACCTGGTGC  | 0   | 29 | RDR2-sensitive |
| GCCGACGTGCTGACTGTGCCGGAC  | 0   | 12 | RDR2-sensitive |
| GCCGACGTGTGGTCTGTTACGGA   | 0   | 20 | RDR2-sensitive |
| GCCGACTGAGCATACGATGGAGAC  | 0   | 12 | RDR2-sensitive |
| GCCGACTGTAGCAAATGGTTCGT   | 0   | 16 | RDR2-sensitive |
| GCCGACTGTAGCTAAATGGTTCGT  | 0   | 25 | RDR2-sensitive |
| GCCGAGAACTCTACTGCCGACTGC  | 0   | 57 | RDR2-sensitive |
| GCCGAGAACTCTACTGTGACTGC   | 0   | 17 | RDR2-sensitive |
| GCCGAGAGGCAGAACGATGGCACA  | 0   | 28 | RDR2-sensitive |
| GCCGAGATCTCAGGACTATGGTTA  | 0   | 10 | RDR2-sensitive |
| GCCGAGCAGACTGCAGACAAACAA  | 0   | 10 | RDR2-sensitive |
| GCCGAGCGTAGTCTGTATGTGCGA  | 0   | 10 | RDR2-sensitive |
| GCCGAGCTCGGACACGTCGACGTC  | 0   | 10 | RDR2-sensitive |

|                           |     |     |                |
|---------------------------|-----|-----|----------------|
| GCCGAGCTCTGACGTGGCCGCAAC  | 0   | 12  | RDR2-sensitive |
| GCCGAGCTCTGACGTGGCGACGAC  | 3   | 19  | RDR2-sensitive |
| GCCGAGCTCTGACGTGGCGACGGG  | 0   | 17  | RDR2-sensitive |
| GCCGAGCTCTGACGTGGTTTTGGC  | 0   | 12  | RDR2-sensitive |
| GCCGAGCTCTGATATGGCCAAGAC  | 0   | 11  | RDR2-sensitive |
| GCCGAGGACAGTGTTGAAGACGAC  | 0   | 12  | RDR2-sensitive |
| GCCGAGGACTGGGGGCATGGTGAT  | 0   | 12  | RDR2-sensitive |
| GCCGAGGTCTGTAGCTGGCGGGC   | 138 | 20  | RDR2-resistant |
| GCCGAGTCGCAGCGATAGTAGGAA  | 0   | 10  | RDR2-sensitive |
| GCCGAGTGTGGGCTAGGGACGGAT  | 0   | 14  | RDR2-sensitive |
| GCCGATCAGTGACGTGGACACGGT  | 90  | 3   | RDR2-resistant |
| GCCGATCCATCTGGGCTGGGGCAC  | 1   | 31  | RDR2-sensitive |
| GCCGATCCGAGCCGAGCCGAGCTG  | 0   | 9   | RDR2-sensitive |
| GCCGATCCGGACTTGCTTGAGGGC  | 2   | 17  | RDR2-sensitive |
| GCCGATCCGGATCTGCTTGAGGGC  | 8   | 83  | RDR2-sensitive |
| GCCGATCCGGCGGACAGAGACGAC  | 0   | 9   | RDR2-sensitive |
| GCCGATCCGGGCGGAAGACATTGT  | 39  | 2   | RDR2-resistant |
| GCCGATCGGGGACGGTTATTTCCG  | 1   | 37  | RDR2-sensitive |
| GCCGATGACTAAAGAACAGGCCGG  | 0   | 12  | RDR2-sensitive |
| GCCGATGACTGAAAGTAGGGACGT  | 0   | 14  | RDR2-sensitive |
| GCCGATGACTGCAAGTAGTGACGT  | 0   | 25  | RDR2-sensitive |
| GCCGATGACTGGAAGTAGGGACGC  | 0   | 10  | RDR2-sensitive |
| GCCGATGACTGGAAGTAGGGACGT  | 0   | 68  | RDR2-sensitive |
| GCCGATGACTGGATGTAGGGACGT  | 1   | 26  | RDR2-sensitive |
| GCCGATGACTGGGCACACGTGCTG  | 1   | 20  | RDR2-sensitive |
| GCCGATGGGAACATGGACGGCGGG  | 44  | 86  | RDR2-sensitive |
| GCCGATGTACAGTTCGCCGAGCGT  | 0   | 9   | RDR2-sensitive |
| GCCGATGTGGGACTAAAGCCGGGG  | 1   | 14  | RDR2-sensitive |
| GCCGCACGGGATCTTAAGACACGA  | 0   | 9   | RDR2-sensitive |
| GCCGCACGTCGTCAGGGCCCTAAG  | 0   | 12  | RDR2-sensitive |
| GCCGCAGCCGCAGCCGATTGCAG   | 0   | 11  | RDR2-sensitive |
| GCCGCCACTGAGAACCGTTCGGAC  | 0   | 21  | RDR2-sensitive |
| GCCGCCCTGGGGAACGACGACGGT  | 0   | 95  | RDR2-sensitive |
| GCCGCCCGCGCTTAGACACGACGT  | 0   | 15  | RDR2-sensitive |
| GCCGCCTGGGTAAGGATCTGTCCG  | 0   | 12  | RDR2-sensitive |
| GCCGCCTTGGGCTGTAATGTTGGC  | 0   | 28  | RDR2-sensitive |
| GCCGCGACTTGCAACTTCGACGGA  | 0   | 11  | RDR2-sensitive |
| GCCGCGACTTGCGACTTCGACGGA  | 20  | 52  | RDR2-sensitive |
| GCCGCGACTTGTGACTTCGACGGA  | 0   | 13  | RDR2-sensitive |
| GCCGCGGCTGGAACCTGGAAGCGG  | 0   | 66  | RDR2-sensitive |
| GCCGCGGTTCGTCCCTGATGTTGGC | 0   | 10  | RDR2-sensitive |
| GCCGCGGTGTAGGGATGGGCGAGC  | 1   | 23  | RDR2-sensitive |
| GCCGCTACGGTGGATAGTCGGAAC  | 0   | 11  | RDR2-sensitive |
| GCCGCTAGTACTGTAGCACCGGTA  | 1   | 127 | RDR2-sensitive |
| GCCGCTCTGAGCCAAACCGAGACG  | 0   | 13  | RDR2-sensitive |
| GCCGCTCTGAGCCGAGCCGAGCCG  | 0   | 9   | RDR2-sensitive |
| GCCGCTCTGTTCTGTATTTGGTAA  | 0   | 16  | RDR2-sensitive |
| GCCGCTCTGTTCTGTGTTTGGTAA  | 1   | 32  | RDR2-sensitive |
| GCCGCTCTTATAGCGAGGTCGCGG  | 0   | 9   | RDR2-sensitive |

|                           |   |     |                |
|---------------------------|---|-----|----------------|
| GCCGCTTTAAGGGATCTGTTGGAG  | 0 | 22  | RDR2-sensitive |
| GCCGGAACCGAGGGAGACGTCCAC  | 1 | 28  | RDR2-sensitive |
| GCCGGAATCAGCAGAGTCGACGAC  | 0 | 9   | RDR2-sensitive |
| GCCGGAATCAGCAGGATCGACGAC  | 0 | 17  | RDR2-sensitive |
| GCCGGAATCAGCAGGGTCGACGAC  | 0 | 22  | RDR2-sensitive |
| GCCGGAATCAGCAGGGTCGACGAT  | 2 | 59  | RDR2-sensitive |
| GCCGGACATGTTTCAGGATCGTCGT | 2 | 24  | RDR2-sensitive |
| GCCGGACCAGGTCCAGACGTCTAT  | 2 | 62  | RDR2-sensitive |
| GCCGGACCAGGTTTCAGACGTCTAT | 0 | 10  | RDR2-sensitive |
| GCCGGACCGTAGGCCTAGATACGG  | 0 | 10  | RDR2-sensitive |
| GCCGGACTTAGAGCCCAAGCACGG  | 0 | 13  | RDR2-sensitive |
| GCCGGAGAAGACAGCTATCCCAT   | 0 | 15  | RDR2-sensitive |
| GCCGGAGAAGGACACGACGAAGAC  | 2 | 115 | RDR2-sensitive |
| GCCGGAGACGAGGCAGAGCTGCAA  | 0 | 10  | RDR2-sensitive |
| GCCGGAGACGGTACTATAGATCCA  | 1 | 15  | RDR2-sensitive |
| GCCGGAGCCTGTACACGCGGCTGT  | 0 | 35  | RDR2-sensitive |
| GCCGGAGGATAGCACGCAAGACGT  | 0 | 9   | RDR2-sensitive |
| GCCGGAGGATAGCGTGCATGACGT  | 0 | 24  | RDR2-sensitive |
| GCCGGAGTAGCTGACGTGGACGGT  | 1 | 19  | RDR2-sensitive |
| GCCGGATAAGCAGAACCAGGCTCA  | 0 | 91  | RDR2-sensitive |
| GCCGGATATTGTGGAGAAGGGCGT  | 0 | 10  | RDR2-sensitive |
| GCCGGATCACGGGTCAAACGGGCT  | 0 | 10  | RDR2-sensitive |
| GCCGGATCAGAGGATGTCACGCGC  | 0 | 16  | RDR2-sensitive |
| GCCGGATCAGGTCTAGACGTCTAT  | 0 | 9   | RDR2-sensitive |
| GCCGGATCGGAGGATGTCACGCGC  | 1 | 16  | RDR2-sensitive |
| GCCGGATCTGAGGATGAGAAGGGC  | 0 | 10  | RDR2-sensitive |
| GCCGGATTATCTCTATGCAGGCAA  | 0 | 9   | RDR2-sensitive |
| GCCGGATTGATGAAGAGTTGGCGT  | 0 | 9   | RDR2-sensitive |
| GCCGGATTTGACTGCGATGGCGGC  | 0 | 37  | RDR2-sensitive |
| GCCGGCACGCAGATCGCAGACGCA  | 0 | 9   | RDR2-sensitive |
| GCCGGCCTCGAGCAGATAGGACAT  | 1 | 13  | RDR2-sensitive |
| GCCGGCGATGTAGGAGAGCGGGAC  | 0 | 11  | RDR2-sensitive |
| GCCGGCGTGTAGATCAAGAGTGGA  | 0 | 9   | RDR2-sensitive |
| GCCGGCTAAGCAGAACAGATCCAT  | 0 | 13  | RDR2-sensitive |
| GCCGGCTAGACGACGCAAACACAT  | 0 | 14  | RDR2-sensitive |
| GCCGGCTTGAGCTCGGTGCGGCTC  | 0 | 9   | RDR2-sensitive |
| GCCGGGATGGCATATCTGCACGAA  | 0 | 9   | RDR2-sensitive |
| GCCGGGCTAATTGGACCGTCGGGC  | 0 | 12  | RDR2-sensitive |
| GCCGGGCTACTTGGGCCGTCGGGC  | 0 | 10  | RDR2-sensitive |
| GCCGGGCTAGGTAGAGCGAGGCAA  | 0 | 21  | RDR2-sensitive |
| GCCGGGCTATTTGGGTCGTTGGGC  | 1 | 15  | RDR2-sensitive |
| GCCGGGCTGACTCGGTAAGCACGG  | 0 | 17  | RDR2-sensitive |
| GCCGGGCTGGCCTAGAAAGTACGG  | 0 | 11  | RDR2-sensitive |
| GCCGGGCTGGGCATGACACGACAG  | 0 | 14  | RDR2-sensitive |
| GCCGGGGACCTGCCGACTTGACGG  | 0 | 39  | RDR2-sensitive |
| GCCGGGTCACGGGCTAAACGGGCG  | 0 | 10  | RDR2-sensitive |
| GCCGGGTTACGTAGTGCAGTGCAT  | 0 | 15  | RDR2-sensitive |
| GCCGGGTTGGACTGCACGACGGGC  | 1 | 25  | RDR2-sensitive |
| GCCGGTATGGTCGAGGACTGGCTA  | 0 | 16  | RDR2-sensitive |



|                           |    |     |                |
|---------------------------|----|-----|----------------|
| GCCGGTTCGACGTGAATGAGCGGAT | 0  | 13  | RDR2-sensitive |
| GCCGGTTCGGCTATGCACGGCTCAC | 0  | 19  | RDR2-sensitive |
| GCCGGTCTCTAGCGAGCGTTGACG  | 0  | 38  | RDR2-sensitive |
| GCCGGTCTGGACCAGTTGAACGGG  | 0  | 20  | RDR2-sensitive |
| GCCGGTGACCTGCCGACTTGACGG  | 0  | 18  | RDR2-sensitive |
| GCCGGTGACGAACTCCAAGCGGCC  | 0  | 84  | RDR2-sensitive |
| GCCGGTGATGTAGAGTGCATCAGA  | 19 | 1   | RDR2-resistant |
| GCCGGTGACAGGTGAACGGACGGAC | 0  | 16  | RDR2-sensitive |
| GCCGGTGGGGTAGTCTGATGGCGC  | 0  | 11  | RDR2-sensitive |
| GCCGGTGGTAGACTGGAGCTCGGC  | 0  | 10  | RDR2-sensitive |
| GCCGGTGGTCAGACGTTGGATGAA  | 0  | 10  | RDR2-sensitive |
| GCCGGTGTGGTAGTTATCGACGT   | 0  | 10  | RDR2-sensitive |
| GCCGGTTCGTCGACAGCTAAGGCC  | 0  | 10  | RDR2-sensitive |
| GCCGGTCTTGTGAGTGTTGGC     | 3  | 37  | RDR2-sensitive |
| GCCGTAGGATTGCTGCTTGATGGT  | 1  | 46  | RDR2-sensitive |
| GCCGTAGGATTGCTGTTTGATGGT  | 0  | 14  | RDR2-sensitive |
| GCCGTAGTCGTTGGTCCAACGGAG  | 0  | 13  | RDR2-sensitive |
| GCCGTCATGTCGTTGGATGGAAAA  | 0  | 106 | RDR2-sensitive |
| GCCGTCTGGAAGGGTGATTGTCGT  | 0  | 100 | RDR2-sensitive |
| GCCGTGACGGTGACTTTTCTTTGC  | 0  | 15  | RDR2-sensitive |
| GCCGTGAGCAGATAGAACCGTGCA  | 0  | 18  | RDR2-sensitive |
| GCCGTGCCGGACTTGGATCAGGCT  | 0  | 19  | RDR2-sensitive |
| GCCGTGCCGGGCCAAGAACGACGG  | 1  | 15  | RDR2-sensitive |
| GCCGTGCGACGTGTAGAGTGACGT  | 1  | 12  | RDR2-sensitive |
| GCCGTGCGTTATACGGAGTCGGAT  | 0  | 57  | RDR2-sensitive |
| GCCGTGCTGTCGAGCAGGAGCTGA  | 0  | 29  | RDR2-sensitive |
| GCCGTGGCTGAGGATTCTCGCGGC  | 0  | 12  | RDR2-sensitive |
| GCCGTGGGCCGATGACTGGGCATA  | 0  | 12  | RDR2-sensitive |
| GCCGTGTAGAACAAAAGAGGCCAC  | 0  | 14  | RDR2-sensitive |
| GCCGTGTATGGTTGTCGGATACGG  | 0  | 9   | RDR2-sensitive |
| GCCGTGTCGGGCTCGTGCCGTGCT  | 0  | 14  | RDR2-sensitive |
| GCCGTGTCGGGTCTGGACTGGCTA  | 1  | 13  | RDR2-sensitive |
| GCCGTGTCGTGCCTGTAGCCCGGT  | 0  | 16  | RDR2-sensitive |
| GCCGTTAGGGTTCGACCGTTGGAG  | 3  | 17  | RDR2-sensitive |
| GCCGTTGGTCGTCGCTCTCCGGT   | 0  | 9   | RDR2-sensitive |
| GCCGTTGTCGTCGGATCGAACGGC  | 0  | 10  | RDR2-sensitive |
| GCCTAAACTGGACTTGAGCTACGG  | 0  | 12  | RDR2-sensitive |
| GCCTAAAGCACGGACTGTTCCGGTG | 0  | 10  | RDR2-sensitive |
| GCCTAAATGGTTGTTCCGATAGAA  | 0  | 10  | RDR2-sensitive |
| GCCTAACAGGACGGCTGAAAGCAC  | 0  | 31  | RDR2-sensitive |
| GCCTACAGGTCGGACGGTCCGCGC  | 0  | 9   | RDR2-sensitive |
| GCCTACCAATTAACCGTGTCGGAC  | 0  | 15  | RDR2-sensitive |
| GCCTACCATCGGACTGTTCCGGTGC | 0  | 13  | RDR2-sensitive |
| GCCTACCGAGTGGGACTGCGTCGT  | 0  | 13  | RDR2-sensitive |
| GCCTACGCCTCCAAATCGTCAAG   | 0  | 23  | RDR2-sensitive |
| GCCTAGCCGAACTGTCTACGCGA   | 3  | 35  | RDR2-sensitive |
| GCCTAGCGGGCTGTCTTGAGGTAC  | 0  | 30  | RDR2-sensitive |
| GCCTAGGTACGGCACGAATACTCT  | 0  | 12  | RDR2-sensitive |
| GCCTATAGCAGGTCGGCTCGGACA  | 0  | 24  | RDR2-sensitive |

|                           |     |     |                |
|---------------------------|-----|-----|----------------|
| GCCTATCCTTGCATCGCTCGGCAC  | 0   | 10  | RDR2-sensitive |
| GCCTATCGCGTAGGACAGTTCGGC  | 0   | 14  | RDR2-sensitive |
| GCCTATCGGATCGGAGAAGCCCGC  | 7   | 48  | RDR2-sensitive |
| GCCTATTGGGTCGTGCGTTGTCGG  | 0   | 16  | RDR2-sensitive |
| GCCTATTTCTGTAGTCTATCGGTT  | 143 | 0   | RDR2-resistant |
| GCCTCACGCCAGGTCGCGGACCGT  | 0   | 19  | RDR2-sensitive |
| GCCTCAGCCTTAGCTCGTCGGTCA  | 1   | 25  | RDR2-sensitive |
| GCCTCCAAATCGTCGAAGCCGCAA  | 0   | 17  | RDR2-sensitive |
| GCCTCCAAATCGTCGAAGCCGCAC  | 1   | 47  | RDR2-sensitive |
| GCCTCCAAATCGTCGAAGCCGCAT  | 0   | 100 | RDR2-sensitive |
| GCCTCCAACAGCGTATCGTCGGTG  | 0   | 16  | RDR2-sensitive |
| GCCTCCGAATTGTGATCGCGCGGA  | 0   | 12  | RDR2-sensitive |
| GCCTCGCGCGGGACGGTAGAGGGC  | 0   | 18  | RDR2-sensitive |
| GCCTCGCGCGTCTGTATGAAGCAT  | 0   | 11  | RDR2-sensitive |
| GCCTCGCGCGTCTGTATGGAGCAT  | 0   | 15  | RDR2-sensitive |
| GCCTCGCGTGTCTGTATGGAGCAT  | 0   | 17  | RDR2-sensitive |
| GCCTCGGTTAGTCGGGCCTGGCTA  | 0   | 14  | RDR2-sensitive |
| GCCTCTACTGCTGACGGGAGGGAA  | 0   | 15  | RDR2-sensitive |
| GCCTCTCGGAAGGGACTTCGTGCA  | 0   | 16  | RDR2-sensitive |
| GCCTCTGTCCGGCTCTGTGAGGTGC | 0   | 9   | RDR2-sensitive |
| GCCTCTTCGGACGGTCCGGATGGTC | 0   | 19  | RDR2-sensitive |
| GCCTGAAAGGTGACGTAGGACGAC  | 0   | 13  | RDR2-sensitive |
| GCCTGAACGCTTGGATGCCGGCCT  | 0   | 22  | RDR2-sensitive |
| GCCTGACCAGAGAGCACCGCCGCC  | 8   | 47  | RDR2-sensitive |
| GCCTGACCAGAGAGCACCGCCGCT  | 1   | 24  | RDR2-sensitive |
| GCCTGACCAGAGAGCACCGCTGCC  | 1   | 13  | RDR2-sensitive |
| GCCTGACGACGGTGAACGCGCGAA  | 0   | 10  | RDR2-sensitive |
| GCCTGACGCGTAGGACAGTTCGGC  | 0   | 40  | RDR2-sensitive |
| GCCTGACTCTAAACCATGCGGTGT  | 0   | 12  | RDR2-sensitive |
| GCCTGAGACTGTACGTGACGACGT  | 0   | 22  | RDR2-sensitive |
| GCCTGAGAGAACCACAGAAACGGT  | 0   | 11  | RDR2-sensitive |
| GCCTGAGCAGAGCATGGACCCTTC  | 42  | 1   | RDR2-resistant |
| GCCTGAGCGCGCTGTCCGGCGGCC  | 17  | 0   | RDR2-resistant |
| GCCTGATAGAAGGGCTCTCGGCAT  | 0   | 9   | RDR2-sensitive |
| GCCTGATCATGTTGGACGGGCCGG  | 1   | 43  | RDR2-sensitive |
| GCCTGATCCTGAAGACGTTGGCCG  | 1   | 12  | RDR2-sensitive |
| GCCTGATTGGTCGGATATGGGCGT  | 0   | 18  | RDR2-sensitive |
| GCCTGCAACTCGTCGAGACGCCGA  | 0   | 10  | RDR2-sensitive |
| GCCTGCACGGATTGTTGTTACGGT  | 1   | 12  | RDR2-sensitive |
| GCCTGCGCTGTAGATGCCGATGGT  | 0   | 13  | RDR2-sensitive |
| GCCTGCGTTGGACACTTGGACGGC  | 0   | 11  | RDR2-sensitive |
| GCCTGCTAGACGAGTCGGACACAG  | 0   | 33  | RDR2-sensitive |
| GCCTGCTCGGACGGAGGACGGATC  | 4   | 22  | RDR2-sensitive |
| GCCTGCTGTGGAAACCAAGACTGT  | 0   | 14  | RDR2-sensitive |
| GCCTGCTTCAGACGACTCGAACGG  | 0   | 21  | RDR2-sensitive |
| GCCTGCTTGGACGAACCGCGGAAC  | 0   | 11  | RDR2-sensitive |
| GCCTGGACCAATTGAACGGGCCGA  | 0   | 11  | RDR2-sensitive |
| GCCTGGACCAGTTGAACGGGCCGA  | 0   | 13  | RDR2-sensitive |
| GCCTGGACCAGTTGAACGGACCGA  | 0   | 24  | RDR2-sensitive |

|                           |    |     |                |
|---------------------------|----|-----|----------------|
| GCCTGGACCAGTTGAACGGGCCGA  | 0  | 15  | RDR2-sensitive |
| GCCTGGACCATGACTGCGACACGC  | 0  | 56  | RDR2-sensitive |
| GCCTGGACCGTGCTTTTTCGTGCC  | 0  | 18  | RDR2-sensitive |
| GCCTGGACGGAGCAGCTGATGCGC  | 0  | 10  | RDR2-sensitive |
| GCCTGGACGGCTACTGTAGCCCAC  | 0  | 26  | RDR2-sensitive |
| GCCTGGACTGGGAAGATGGTGCC   | 1  | 40  | RDR2-sensitive |
| GCCTGGACTGTGGAAGATGGTGCT  | 1  | 28  | RDR2-sensitive |
| GCCTGGCACGGTAGAATAAGCGGG  | 0  | 32  | RDR2-sensitive |
| GCCTGGCTCCAGAGATGCGAACAA  | 0  | 20  | RDR2-sensitive |
| GCCTGGCTGGCCAGATACTGGCAT  | 0  | 16  | RDR2-sensitive |
| GCCTGGCTGTAAGCACGCATCCAA  | 0  | 9   | RDR2-sensitive |
| GCCTGGCTTCCTCTGGACGATGGT  | 2  | 16  | RDR2-sensitive |
| GCCTGGGCAGTTAGGACGCGGCAA  | 0  | 16  | RDR2-sensitive |
| GCCTGGGCTGCCGGCTACGCTCGT  | 1  | 20  | RDR2-sensitive |
| GCCTGGGCTGTAATGTGCAGACAA  | 0  | 67  | RDR2-sensitive |
| GCCTGGGCTGTTGGATGGTAAGAT  | 0  | 12  | RDR2-sensitive |
| GCCTGGGCTGTTGGTTTCGGCGGA  | 7  | 49  | RDR2-sensitive |
| GCCTGGGTGGGACGGTTGGCTCGG  | 0  | 12  | RDR2-sensitive |
| GCCTGGTAGTGCCCTCTGCGACGG  | 1  | 69  | RDR2-sensitive |
| GCCTGGTAGTGCCTCTGCGACGG   | 0  | 14  | RDR2-sensitive |
| GCCTGGTCGGTACGGTGCGGTCAG  | 0  | 46  | RDR2-sensitive |
| GCCTGGTCGGTAGAGCGACACGGA  | 0  | 14  | RDR2-sensitive |
| GCCTGGTCGTCGATCTCCAGTGGC  | 0  | 9   | RDR2-sensitive |
| GCCTGTACCTCTGCGCTTTGACGG  | 0  | 13  | RDR2-sensitive |
| GCCTGTAGACCGGACGGTCCGCGC  | 0  | 16  | RDR2-sensitive |
| GCCTGTAGATAGGGTGTACCTGCG  | 0  | 12  | RDR2-sensitive |
| GCCTGTAGATCAACGGCTGAAAAC  | 1  | 19  | RDR2-sensitive |
| GCCTGTAGCACCTGGCAAAGCAGC  | 0  | 11  | RDR2-sensitive |
| GCCTGTAGCACTAGCGGCACTGAA  | 0  | 11  | RDR2-sensitive |
| GCCTGTAGGCCGGACGGTCCGCGC  | 0  | 13  | RDR2-sensitive |
| GCCTGTAGTGCCTGGGCACGACAC  | 0  | 10  | RDR2-sensitive |
| GCCTGTAGTGTAGTTGGACATCAA  | 0  | 15  | RDR2-sensitive |
| GCCTGTAGTTAGTATTTGCGCGGA  | 21 | 1   | RDR2-resistant |
| GCCTGTATAGAGCCGAGACGTGCT  | 1  | 12  | RDR2-sensitive |
| GCCTGTATTGTCGTATCGTCTGAC  | 0  | 10  | RDR2-sensitive |
| GCCTGTCAACTGGGTGGAACGGAC  | 0  | 9   | RDR2-sensitive |
| GCCTGTCCGGTGGCATGATAGAAC  | 34 | 4   | RDR2-resistant |
| GCCTGTGAGCTTTGGAGGTGGTG   | 0  | 15  | RDR2-sensitive |
| GCCTGTGCGGGGCTGGGACAAGGC  | 0  | 47  | RDR2-sensitive |
| GCCTGTGCGGTAGGACAGTTCGGC  | 8  | 225 | RDR2-sensitive |
| GCCTGTGCGGTAGGATAGTTCGGC  | 1  | 18  | RDR2-sensitive |
| GCCTGTGCGTGCCCTCTACGGTGT  | 0  | 13  | RDR2-sensitive |
| GCCTGTGACTGTGACATCGGCTGA  | 0  | 13  | RDR2-sensitive |
| GCCTGTGGACTGCGGATGGCGGT   | 0  | 18  | RDR2-sensitive |
| GCCTGTGGCGCCGAGCTATGACGT  | 0  | 15  | RDR2-sensitive |
| GCCTGTGGGATTTGTCAAGAGGT   | 0  | 9   | RDR2-sensitive |
| GCCTGTGGTTTCGGACGGTCCGCGC | 0  | 12  | RDR2-sensitive |
| GCCTGTGTGAACCTCCAGCAGCAC  | 15 | 0   | RDR2-resistant |
| GCCTGTAGCCAGAATCGTGCAGC   | 0  | 11  | RDR2-sensitive |

|                           |     |    |                |
|---------------------------|-----|----|----------------|
| GCCTGTTTCGGCTGTTCTGGCGGC  | 1   | 32 | RDR2-sensitive |
| GCCTGTTCTCTGACATCTGCAGAA  | 8   | 41 | RDR2-sensitive |
| GCCTGTTTGAAGTGTGGCACGGCA  | 1   | 24 | RDR2-sensitive |
| GCCTAACGGGCTGTGGGCCGGCC   | 0   | 10 | RDR2-sensitive |
| GCCTTACGCGCTTATCGTCCTGGA  | 2   | 15 | RDR2-sensitive |
| GCCTTAGAACTCTCCCCTCGACGG  | 0   | 9  | RDR2-sensitive |
| GCCTTAGTTCGTCGAGAGTGGCAC  | 1   | 12 | RDR2-sensitive |
| GCCTTATGGGTCTGGTGGCGTCGGA | 0   | 9  | RDR2-sensitive |
| GCCTTCAAATCGTCGAAGCCGCAT  | 0   | 17 | RDR2-sensitive |
| GCCTTCAAATTGTGATCGCGCGGA  | 0   | 10 | RDR2-sensitive |
| GCCTTCACTGTAGTAAGGGGTA    | 1   | 14 | RDR2-sensitive |
| GCCTTCACTGCGAACTGCTTGGA   | 0   | 14 | RDR2-sensitive |
| GCCTTCAAGCTCTACGAATTCGGC  | 1   | 14 | RDR2-sensitive |
| GCCTTCATACTGTAGTAACGGGTA  | 0   | 11 | RDR2-sensitive |
| GCCTTCGACTCGTAGCCACAGGC   | 0   | 15 | RDR2-sensitive |
| GCCTTCGTTGGACCGTGTGGGCC   | 2   | 16 | RDR2-sensitive |
| GCCTTCGTTGGATCGTGCCGGCTC  | 0   | 15 | RDR2-sensitive |
| GCCTTCGTTGGATCGTGTGGGCC   | 0   | 14 | RDR2-sensitive |
| GCCTTCTAGGATCGGATCGCGCGG  | 1   | 12 | RDR2-sensitive |
| GCCTTCTGTAGGAGACGACATA    | 0   | 11 | RDR2-sensitive |
| GCCTTCTGTCGTCGGGCGCACCGG  | 6   | 44 | RDR2-sensitive |
| GCCTTCTGTCGTCGGGGGCACCGG  | 0   | 11 | RDR2-sensitive |
| GCCTTGGACTGAACGAGGACGCG   | 1   | 14 | RDR2-sensitive |
| GCCTTGGCTGTAATGTTGGCTGT   | 0   | 11 | RDR2-sensitive |
| GCCTTGTATCGGCCGGACACGGTT  | 1   | 15 | RDR2-sensitive |
| GCCTTGTCTGTGCTGTTTATCGGTT | 178 | 34 | RDR2-resistant |
| GCCTTGTGTTGGATTGTACGGTGT  | 0   | 9  | RDR2-sensitive |
| GCCTTTAAATCGTCGAAGCCGCAC  | 0   | 18 | RDR2-sensitive |
| GCCTTTAACGTAAGTGAACCGGTGT | 0   | 17 | RDR2-sensitive |
| GCCTTTATGTGATGATTTGACGGT  | 0   | 11 | RDR2-sensitive |
| GCCTTTATTGTATCGTCGGGACGG  | 0   | 9  | RDR2-sensitive |
| GCCTTTCCGACTGTTCTGACGGTA  | 0   | 29 | RDR2-sensitive |
| GCCTTTGACGGAGGCTGAGTCGGA  | 0   | 13 | RDR2-sensitive |
| GCCTTTGTAGATCCGAGCGGCCAG  | 0   | 55 | RDR2-sensitive |
| GCGAAACACATGTGGATGGGGCAT  | 0   | 10 | RDR2-sensitive |
| GCGAAACCTGATGGATGAGAGCGG  | 0   | 13 | RDR2-sensitive |
| GCGAAACGACTGTTGGGCTTCGGC  | 0   | 9  | RDR2-sensitive |
| GCGAACACCAGTCGGAGACGTCAC  | 0   | 22 | RDR2-sensitive |
| GCGAACAGTAACGAGATGAGCAC   | 1   | 13 | RDR2-sensitive |
| GCGAACCGCGGAACAGGATTCGGC  | 1   | 31 | RDR2-sensitive |
| GCGAACCGCGCAGAACAAGCAA    | 0   | 14 | RDR2-sensitive |
| GCGAACGGAAGTTCGTTGGAGACGA | 0   | 10 | RDR2-sensitive |
| GCGAAGAAGACGACTCTGCGCC    | 0   | 11 | RDR2-sensitive |
| GCGAAGACGTAAGAGCCAGGCGCT  | 0   | 19 | RDR2-sensitive |
| GCGAAGACGTGACTGCATCTGTAC  | 0   | 12 | RDR2-sensitive |
| GCGAAGACTGGACGATCGAGTCAT  | 0   | 10 | RDR2-sensitive |
| GCGAAGAGAATTGGACCAAGGCAA  | 0   | 11 | RDR2-sensitive |
| GCGACAATTTACTCGTCGGTCCAG  | 1   | 18 | RDR2-sensitive |
| GCGACAGAGCTCATGATCGTCGAG  | 0   | 9  | RDR2-sensitive |

|                             |     |    |                |
|-----------------------------|-----|----|----------------|
| GCGACAGGCGTAGACACCCGGCAA    | 2   | 25 | RDR2-sensitive |
| GCGACAGGTGTAGGCTCTAGCGGC    | 0   | 10 | RDR2-sensitive |
| GCGACAGTAGATCGGACGGTCCGC    | 0   | 14 | RDR2-sensitive |
| GCGACCCACAAACAGGACTGGCAT    | 0   | 34 | RDR2-sensitive |
| GCGACCCCAGGTCAGTCGGGACTA    | 650 | 94 | RDR2-resistant |
| GCGACCGACCGTTGGCTGAGGCAC    | 0   | 11 | RDR2-sensitive |
| GCGACCTGGCGCAGAAGCTGACGT    | 1   | 22 | RDR2-sensitive |
| GCGACGACACTGGTGGCTCGACGG    | 0   | 9  | RDR2-sensitive |
| GCGACGACTGTAGATGGTGACGGG    | 0   | 19 | RDR2-sensitive |
| GCGACGACTGTGTACGGCTACATC    | 0   | 11 | RDR2-sensitive |
| GCGACGAGGACGATTGGCGCCAAC    | 22  | 0  | RDR2-resistant |
| GCGACGCTCAGAACTGCACTAGAC    | 0   | 10 | RDR2-sensitive |
| GCGACGCTGAGCAGAGGACTTCAT    | 0   | 16 | RDR2-sensitive |
| GCGACGGCAGAACCACGGCAGAAC    | 0   | 16 | RDR2-sensitive |
| GCGACGGCTAAAACGACGGAACAA    | 0   | 18 | RDR2-sensitive |
| GCGACGGCTTACAACAATACCCAC    | 0   | 20 | RDR2-sensitive |
| GCGACGTAATCGGACTTTATTGGA    | 21  | 2  | RDR2-resistant |
| GCGACTAGGGAAGAAGAGGACGCT    | 0   | 12 | RDR2-sensitive |
| GCGACTCGAACTCGGATGGCGGTC    | 0   | 9  | RDR2-sensitive |
| GCGACTCGGCTACGACGGTGACTC    | 0   | 11 | RDR2-sensitive |
| GCGACTCTGGTAGGATGGATGGAG    | 16  | 0  | RDR2-resistant |
| GCGACTGAACCAGATGGCACCTTT    | 0   | 14 | RDR2-sensitive |
| GCGACTGAACCAGCACAGACGGAC    | 0   | 27 | RDR2-sensitive |
| GCGACTGAGAGCCTAGACAGATGG    | 0   | 47 | RDR2-sensitive |
| GCGACTGAGAGCCTAGGCAGATAG    | 0   | 18 | RDR2-sensitive |
| GCGACTGAGAGCCTAGGCAGATGG    | 2   | 49 | RDR2-sensitive |
| GCGACTGCGGATCGGCTAAATCAC    | 0   | 9  | RDR2-sensitive |
| GCGACTGGACGTACCTGGAAGGCG    | 0   | 26 | RDR2-sensitive |
| GCGACTGGATCGACAGCGAGCGGC    | 0   | 13 | RDR2-sensitive |
| GCGACTGTGACGGAAAGCTACAA     | 0   | 17 | RDR2-sensitive |
| GCGACTGTGGTCGTGTTTCATCGAA   | 6   | 32 | RDR2-sensitive |
| GCGACTGTTGAAGGTGCACAAGAA    | 0   | 10 | RDR2-sensitive |
| GCGACTTACACTCTGTACGGTGT     | 1   | 15 | RDR2-sensitive |
| GCGACTTCAGTAGACGCGGCCTCT    | 0   | 12 | RDR2-sensitive |
| GCGACTTCCATAGAGCAGGGACGA    | 0   | 26 | RDR2-sensitive |
| GCGAGAACGGAACCGAGACGACTG    | 0   | 10 | RDR2-sensitive |
| GCGAGACACAGGCACTGATGCATA    | 0   | 11 | RDR2-sensitive |
| GCGAGACACAGGCGCTGATGCATA    | 1   | 65 | RDR2-sensitive |
| GCGAGACAGTGTAAGACGGAGACT    | 0   | 11 | RDR2-sensitive |
| GCGAGACAGTGTAAGATGGAGACA    | 0   | 28 | RDR2-sensitive |
| GCGAGACTGAAACGTAGGATCGGA    | 0   | 13 | RDR2-sensitive |
| GCGAGACTGTTGGGAGCAAGGAGG    | 50  | 6  | RDR2-resistant |
| GCGAGATCTAGACGCTGTCCGCAA    | 0   | 58 | RDR2-sensitive |
| GCGAGATTAGCGGGACGAAGACGC    | 0   | 11 | RDR2-sensitive |
| GCGAGCAGTGGACGAGCGGAACGG    | 0   | 13 | RDR2-sensitive |
| GCGAGCAGTTGTAGGCCCTGCAC     | 0   | 14 | RDR2-sensitive |
| GCGAGCATAACAGTTCCTACTGTCCGG | 0   | 14 | RDR2-sensitive |
| GCGAGCCAGGCTGAAGAGGTTGAT    | 0   | 15 | RDR2-sensitive |
| GCGAGCGGGCTAGGAACAGAGCGG    | 1   | 17 | RDR2-sensitive |

|                           |    |    |                |
|---------------------------|----|----|----------------|
| GCGAGCTGGGACTGGGAGAGGCAA  | 1  | 15 | RDR2-sensitive |
| GCGAGCTGTAGCGACGGAGAGGAG  | 0  | 16 | RDR2-sensitive |
| GCGAGCTTAGCCCACTGGACACGG  | 0  | 9  | RDR2-sensitive |
| GCGAGGACCGATCTGAACAGGGCA  | 0  | 10 | RDR2-sensitive |
| GCGAGGACGTGAAGGACGCCGGCG  | 0  | 9  | RDR2-sensitive |
| GCGAGGACTAGACCAAAGAGGATG  | 0  | 9  | RDR2-sensitive |
| GCGAGGCCATAGACCAGAGGACAG  | 0  | 11 | RDR2-sensitive |
| GCGAGGCCTGAGGTTGGAGGTGGC  | 31 | 1  | RDR2-resistant |
| GCGAGGGACTCGGACACTCGGCAA  | 0  | 14 | RDR2-sensitive |
| GCGAGTAGCAACTCCGGATGACGT  | 0  | 10 | RDR2-sensitive |
| GCGAGTGAAGACTGATTGACCGG   | 0  | 18 | RDR2-sensitive |
| GCGAGTTGTAGAGCACGATGGCGT  | 0  | 50 | RDR2-sensitive |
| GCGATAATGGTTGAGGCATGTGAT  | 17 | 0  | RDR2-resistant |
| GCGATACGGTCGGTTGGTAAGGCG  | 0  | 23 | RDR2-sensitive |
| GCGATACGGTCGGTTGGTGAGGCG  | 1  | 14 | RDR2-sensitive |
| GCGATTGATTGGACGTTTTGACGGA | 19 | 1  | RDR2-resistant |
| GCGATTGGAGAACAGCGGGTTAT   | 0  | 14 | RDR2-sensitive |
| GCGATTGGGAATTAAGCCGAGCG   | 0  | 14 | RDR2-sensitive |
| GCGATTGTGGACGCCTACAGTAGA  | 0  | 11 | RDR2-sensitive |
| GCGATTTGGTCGGTCGGTGCGGCG  | 1  | 18 | RDR2-sensitive |
| GCGCAACGGTCGACTGCAACGCAT  | 2  | 19 | RDR2-sensitive |
| GCGCAACTGTCTCTTTCGCTCGGC  | 0  | 10 | RDR2-sensitive |
| GCGCAAGATGGCAATAGCTCTGTT  | 0  | 9  | RDR2-sensitive |
| GCGCAAGGGCGGACTGTCCGCGGC  | 11 | 31 | RDR2-sensitive |
| GCGCAATCTGTACAGTCGTCCGGA  | 0  | 15 | RDR2-sensitive |
| GCGCACACTGGTGGACGCCCTCGT  | 0  | 9  | RDR2-sensitive |
| GCGCACAGACGTAGGACGGGTGGC  | 0  | 14 | RDR2-sensitive |
| GCGCACAGGACGAAGAGCGGCGAC  | 0  | 11 | RDR2-sensitive |
| GCGCACCCAGTGCAGTGTCCGCGG  | 0  | 9  | RDR2-sensitive |
| GCGCACTGTGGAGCGGGAGTTGCA  | 0  | 26 | RDR2-sensitive |
| GCGCAGAACAGATTAGGGTTCCGA  | 1  | 15 | RDR2-sensitive |
| GCGCAGAACCGAGCTCTAAAGCAA  | 0  | 15 | RDR2-sensitive |
| GCGCAGAACGACGACGACTTTCGA  | 1  | 12 | RDR2-sensitive |
| GCGCAGAACTTTGCCGAGGGCGGT  | 1  | 13 | RDR2-sensitive |
| GCGCAGAACTTTGCCGAGTGCGGC  | 0  | 15 | RDR2-sensitive |
| GCGCAGACCTCTGTACCAGGCGTA  | 0  | 18 | RDR2-sensitive |
| GCGCAGATCGACGACTAGCAAGGC  | 0  | 9  | RDR2-sensitive |
| GCGCAGATGTAGGCAACCAACAC   | 0  | 10 | RDR2-sensitive |
| GCGCAGATTAGGCTGTATGGTCAT  | 0  | 11 | RDR2-sensitive |
| GCGCAGCACGTACCTCGGCGCCAT  | 0  | 10 | RDR2-sensitive |
| GCGCAGCAGGACTTGCAGAACGGT  | 0  | 9  | RDR2-sensitive |
| GCGCAGCGCGGCAGAACATGGCAC  | 0  | 19 | RDR2-sensitive |
| GCGCAGGACACTCGGCACATCTAA  | 0  | 9  | RDR2-sensitive |
| GCGCAGGACACTTGGACGAGCGGC  | 0  | 9  | RDR2-sensitive |
| GCGCAGGACGTAACCCGGGAGCGG  | 2  | 41 | RDR2-sensitive |
| GCGCAGGACTAACGAAGGCAGAAC  | 0  | 51 | RDR2-sensitive |
| GCGCAGGACTTTGCCGAGTGCGGC  | 2  | 14 | RDR2-sensitive |
| GCGCAGGAGGCAGAACATGGGCGT  | 1  | 45 | RDR2-sensitive |
| GCGCAGGTTGTATGGACAGACGCA  | 0  | 9  | RDR2-sensitive |

|                           |    |    |                |
|---------------------------|----|----|----------------|
| GCGCAGTAGGGCTTACAGAACGGC  | 0  | 54 | RDR2-sensitive |
| GCGCAGTCGACTCAGCACCCGCAT  | 0  | 10 | RDR2-sensitive |
| GCGCAGTGTGTTTGGACGGCTGAC  | 0  | 10 | RDR2-sensitive |
| GCGCAGTTGAACTCGAGGTGGCGT  | 0  | 10 | RDR2-sensitive |
| GCGCAGTTTTTCTAGGCTGGTCGG  | 0  | 46 | RDR2-sensitive |
| GCGCATAACTCGGTCTCGGACGTC  | 0  | 10 | RDR2-sensitive |
| GCGCATCTGAGCATGTAGACGCCA  | 0  | 15 | RDR2-sensitive |
| GCGCATCTGTGGAGCCAGGCTCAC  | 0  | 51 | RDR2-sensitive |
| GCGCCAGACCGCGGACCGTTCCGGC | 0  | 12 | RDR2-sensitive |
| GCGCCAGGTCGCGGACCGTCCGGC  | 11 | 36 | RDR2-sensitive |
| GCGCCAGGTCGTGGACTCTTCGGT  | 0  | 27 | RDR2-sensitive |
| GCGCCATATTGAGCGGTTCGGACGG | 0  | 9  | RDR2-sensitive |
| GCGCCATCGCGGATAGTCCGGCAC  | 0  | 17 | RDR2-sensitive |
| GCGCCATGTGGACTATAGAGGGCT  | 0  | 44 | RDR2-sensitive |
| GCGCCCGGCACAACCTAGACTGGCA | 0  | 14 | RDR2-sensitive |
| GCGCCCTTAGGTCGGACGGTCCGC  | 21 | 0  | RDR2-resistant |
| GCGCCGAGCTCGGTACCACGTTCGG | 0  | 10 | RDR2-sensitive |
| GCGCCGAGCTCTGACGTGGCCGCA  | 0  | 10 | RDR2-sensitive |
| GCGCCGTCATGTCGTTGGATGGAA  | 0  | 42 | RDR2-sensitive |
| GCGCCGTTGGATGGACTGACCGGC  | 2  | 83 | RDR2-sensitive |
| GCGCCTGGACTGGGGAAGATGGTG  | 0  | 10 | RDR2-sensitive |
| GCGCCTGTAGACCGGACGGTCCGC  | 0  | 31 | RDR2-sensitive |
| GCGCCTGTAGATCAACGGCTGAAA  | 0  | 28 | RDR2-sensitive |
| GCGCCTGTAGGCCGGACGGTCCGC  | 4  | 76 | RDR2-sensitive |
| GCGCCTGTGGGTCGGACGGTCCGC  | 0  | 10 | RDR2-sensitive |
| GCGCGACATGCGGATCGGAGCCAG  | 0  | 9  | RDR2-sensitive |
| GCGCGACGGACGGAGTTCGGCGAC  | 0  | 24 | RDR2-sensitive |
| GCGCGACGGCAGAACCACGGCAGA  | 0  | 50 | RDR2-sensitive |
| GCGCGAGACAGTGTAAAGATGGAGA | 0  | 18 | RDR2-sensitive |
| GCGCGAGGGTAGGACTGGGCAGAA  | 0  | 11 | RDR2-sensitive |
| GCGCGAGGGTGAGGTCGACGGTTC  | 0  | 11 | RDR2-sensitive |
| GCGCGAGGTGTAGAGTGGTGGCAA  | 0  | 25 | RDR2-sensitive |
| GCGCGAGTGGAAGACTGATTGACC  | 0  | 20 | RDR2-sensitive |
| GCGCGCCAGGACGAACAGACGAGC  | 3  | 30 | RDR2-sensitive |
| GCGCGCCGGAATCAGCAGGGTTCGA | 0  | 34 | RDR2-sensitive |
| GCGCGGAGCTGTAGCGACGGAGA   | 0  | 12 | RDR2-sensitive |
| GCGCGCGGGCCGAAAACAACGGTT  | 0  | 9  | RDR2-sensitive |
| GCGCGCGTGCTGTTTCGGAAGACGT | 0  | 12 | RDR2-sensitive |
| GCGCGCTACTGTAGACCCCGGCC   | 0  | 11 | RDR2-sensitive |
| GCGCGCTGTAGAAGGCACCGTCAA  | 1  | 71 | RDR2-sensitive |
| GCGCGCTGTCGGGCGGCCACCAAG  | 19 | 0  | RDR2-resistant |
| GCGCGAACGACGACGACTTTCAG   | 3  | 23 | RDR2-sensitive |
| GCGCGAAGGCCAGGTAGAGCGGT   | 0  | 57 | RDR2-sensitive |
| GCGCGGAGTAGAAACCAAGTTGGA  | 0  | 10 | RDR2-sensitive |
| GCGCGGCAGGCAGAACAGAGCGGC  | 1  | 13 | RDR2-sensitive |
| GCGCGGCAGGCAGAACAGAGCGTG  | 0  | 22 | RDR2-sensitive |
| GCGCGGCAGGTATCTCGGCACCAG  | 0  | 9  | RDR2-sensitive |
| GCGCGGCATGTATAGGACAGGCGT  | 0  | 23 | RDR2-sensitive |
| GCGCGGCGGGAACAGATTTCGGTAC | 0  | 9  | RDR2-sensitive |

|                           |     |     |                |
|---------------------------|-----|-----|----------------|
| GCGCGGCTGTGGACGTACGGCGAG  | 0   | 12  | RDR2-sensitive |
| GCGCGGGACGAACACGAAGGCCGC  | 8   | 107 | RDR2-sensitive |
| GCGCGGGACTAACGACGGCAGAAC  | 0   | 18  | RDR2-sensitive |
| GCGCGGGACTAACGGAGGCAGAAC  | 3   | 41  | RDR2-sensitive |
| GCGCGGGCGCGTAAATTTGACGGA  | 0   | 27  | RDR2-sensitive |
| GCGCGGGCGTTCCGGTAGAGCGGGG | 0   | 11  | RDR2-sensitive |
| GCGCGGGGATGGAATTGGACGGTG  | 0   | 9   | RDR2-sensitive |
| GCGCGGGGTAGAAACCAAGTTGGA  | 0   | 9   | RDR2-sensitive |
| GCGCGGGTTGGTGCTGACAGGCAT  | 0   | 10  | RDR2-sensitive |
| GCGCGGTACTTGGGGCAGAAGCAT  | 0   | 9   | RDR2-sensitive |
| GCGCGTATTGGATGGTAGACGCAT  | 0   | 11  | RDR2-sensitive |
| GCGCGTCAGGATAAAGGTGTCAGG  | 3   | 35  | RDR2-sensitive |
| GCGCGTCAGGATAAGGTGTCAGGC  | 1   | 23  | RDR2-sensitive |
| GCGCGTGACATCCTCTGATCCGGC  | 1   | 18  | RDR2-sensitive |
| GCGCGTGACGCAAGACGGTGGAAC  | 0   | 10  | RDR2-sensitive |
| GCGCGTGCATGTAGAAGTGGTGGT  | 0   | 38  | RDR2-sensitive |
| GCGCGTGGGACTGGGTGTGCAGGC  | 0   | 13  | RDR2-sensitive |
| GCGCGTGGTGAACCTCGAGCGCGGC | 1   | 19  | RDR2-sensitive |
| GCGCTACAGAACCGTCCAGAAGAA  | 0   | 9   | RDR2-sensitive |
| GCGCTATGTGTAGAGGCTGTACGG  | 0   | 9   | RDR2-sensitive |
| GCGCTCCCGGACGACGAGAACGGC  | 0   | 9   | RDR2-sensitive |
| GCGCTCGTGAACCTTTATGGCGGAA | 1   | 39  | RDR2-sensitive |
| GCGCTCTCGGGCAACCGTCGTCGT  | 0   | 11  | RDR2-sensitive |
| GCGCTGAACTCCGGAACGGATCGG  | 0   | 20  | RDR2-sensitive |
| GCGCTGTAGAGGGCACCGCTGCGG  | 0   | 14  | RDR2-sensitive |
| GCGCTGTAGGAGCACCGCTGCGGC  | 1   | 12  | RDR2-sensitive |
| GCGCTGTAGGAGGCACCGCTGCGG  | 0   | 34  | RDR2-sensitive |
| GCGCTGTAGGCCACGTGTCAGCAT  | 0   | 10  | RDR2-sensitive |
| GCGCTGTAGGCTAGGGGATGCGCA  | 0   | 9   | RDR2-sensitive |
| GCGCTGTAGGGACACCGCTGCGGC  | 0   | 16  | RDR2-sensitive |
| GCGCTGTAGGGACACTGCTGCGGC  | 1   | 24  | RDR2-sensitive |
| GCGCTGTAGGGGCACCGCTGCGGC  | 0   | 152 | RDR2-sensitive |
| GCGCTGTAGGGGCACTGCTGCGGC  | 0   | 9   | RDR2-sensitive |
| GCGCTGTAGGGGGCACCGCTGCGG  | 0   | 31  | RDR2-sensitive |
| GCGCTGTAGGGGTACCGCTGCGGC  | 0   | 11  | RDR2-sensitive |
| GCGCTGTCCTTCTGTCAGACCGGT  | 17  | 100 | RDR2-sensitive |
| GCGCTGTCGGCGCTGTTGAGGCCA  | 0   | 17  | RDR2-sensitive |
| GCGCTGTCGGGCGGCCACCAAGAC  | 232 | 22  | RDR2-resistant |
| GCGCTGTCTTTCTGTCAGACCGGT  | 0   | 9   | RDR2-sensitive |
| GCGCTTCCGGACTTCAGAGGGTG   | 0   | 14  | RDR2-sensitive |
| GCGGAAACAGTAGTCCCGGACGGA  | 0   | 17  | RDR2-sensitive |
| GCGGAAACGAGCATGCTGGCACAA  | 0   | 45  | RDR2-sensitive |
| GCGGAAAGGCTAGGTAGAGCGGCT  | 0   | 10  | RDR2-sensitive |
| GCGGAACAGGATTCGGCCACTAT   | 0   | 36  | RDR2-sensitive |
| GCGGAACCGCGGACCACGAAGCGA  | 0   | 13  | RDR2-sensitive |
| GCGGAACGAAGGCAGAACCGTGCA  | 0   | 18  | RDR2-sensitive |
| GCGGAACGACGACGACTTTCAGCT  | 0   | 13  | RDR2-sensitive |
| GCGGAACGACGACGAGATCATGTC  | 0   | 13  | RDR2-sensitive |
| GCGGAACGACGACGAGATCGTGTC  | 0   | 18  | RDR2-sensitive |



|                           |   |    |                |
|---------------------------|---|----|----------------|
| GCGGAACGAGGAGGGCAGAACGGC  | 0 | 16 | RDR2-sensitive |
| GCGGAACGGCTGCTCCTGATCCGG  | 0 | 9  | RDR2-sensitive |
| GCGGAACGTCGTCACTTGGATGGT  | 0 | 13 | RDR2-sensitive |
| GCGGAACTCATGGGCCTGCCGGCG  | 0 | 10 | RDR2-sensitive |
| GCGGAACTGACACGCGAAGGTTGA  | 0 | 12 | RDR2-sensitive |
| GCGGAACTGCAGGAGCACGTGCGC  | 0 | 21 | RDR2-sensitive |
| GCGGAACTGGGCAGAGGACTCGCG  | 0 | 12 | RDR2-sensitive |
| GCGGAACTTGTTCCGGCATAGATCC | 0 | 21 | RDR2-sensitive |
| GCGGAAGAACCGGTCAGAGAGCAT  | 0 | 13 | RDR2-sensitive |
| GCGGAAGACGACGCGACTGAGCAT  | 0 | 17 | RDR2-sensitive |
| GCGGAAGATATGCGCACTCAAGTC  | 0 | 20 | RDR2-sensitive |
| GCGGAAGATCGCCGACGGCGCCTG  | 0 | 16 | RDR2-sensitive |
| GCGGAAGCTGCACTTGCTGATCAG  | 0 | 21 | RDR2-sensitive |
| GCGGAAGCTGGTTACACGGGCGCT  | 0 | 9  | RDR2-sensitive |
| GCGGAAGGCCAGGTAGAGCGGTTG  | 1 | 16 | RDR2-sensitive |
| GCGGAAGGGCATAACTGAGCACAA  | 1 | 14 | RDR2-sensitive |
| GCGGAATGGGAGAGGGCAGAACGG  | 0 | 11 | RDR2-sensitive |
| GCGGAATGGTTCAGATCTGAGGA   | 0 | 11 | RDR2-sensitive |
| GCGGAATGGTTCGGATCTGAGGA   | 3 | 91 | RDR2-sensitive |
| GCGGACAATTCTAGTGGCGTCCGGC | 4 | 20 | RDR2-sensitive |
| GCGGACACGCTGTGGCAGAACCGT  | 0 | 17 | RDR2-sensitive |
| GCGGACACTCGGCAAACGACTGAT  | 0 | 9  | RDR2-sensitive |
| GCGGACAGCACGCGAACGACGCAT  | 0 | 20 | RDR2-sensitive |
| GCGGACAGTCTGAAACGTTGCGGA  | 0 | 15 | RDR2-sensitive |
| GCGGACAGTCTGATCCTTAGGCAT  | 0 | 13 | RDR2-sensitive |
| GCGGACATGAAACATGATGGGCAA  | 1 | 28 | RDR2-sensitive |
| GCGGACATTGTCGCAGTAGACGAG  | 0 | 18 | RDR2-sensitive |
| GCGGACCAGAGACAGAGTGGGCAC  | 0 | 16 | RDR2-sensitive |
| GCGGACCATCGAGCTACAGTCGGT  | 0 | 30 | RDR2-sensitive |
| GCGGACCATCTAACTCGTCGGGCA  | 0 | 15 | RDR2-sensitive |
| GCGGACCATCTGACCGGGTCCGGC  | 0 | 22 | RDR2-sensitive |
| GCGGACCATCTGGACGTACGCAGA  | 0 | 26 | RDR2-sensitive |
| GCGGACCATTACGCGCATGTCGT   | 2 | 37 | RDR2-sensitive |
| GCGGACCGACACAGAGAAGACACC  | 0 | 9  | RDR2-sensitive |
| GCGGACCGACACTAGGAAGACGTC  | 0 | 12 | RDR2-sensitive |
| GCGGACCGAGCCAGCATCGACGTA  | 0 | 31 | RDR2-sensitive |
| GCGGACCGCGCACGCGAACGGCAA  | 0 | 13 | RDR2-sensitive |
| GCGGACCGTCCATACCACAGGTAC  | 0 | 9  | RDR2-sensitive |
| GCGGACCGTCCGACCGTCAGGCAG  | 0 | 9  | RDR2-sensitive |
| GCGGACCGTCCGGACGTACGCAGA  | 0 | 12 | RDR2-sensitive |
| GCGGACCGTCCGGACGTACGCAG   | 0 | 16 | RDR2-sensitive |
| GCGGACCGTCCGGATCATCAGGCA  | 0 | 19 | RDR2-sensitive |
| GCGGACCGTCCGGCATATAGGCAC  | 0 | 9  | RDR2-sensitive |
| GCGGACCGTCCGGCCCACAGACGC  | 0 | 9  | RDR2-sensitive |
| GCGGACCGTCCGGCCTAAGACGTG  | 0 | 11 | RDR2-sensitive |
| GCGGACCGTCCGGCTATAATTCAC  | 0 | 9  | RDR2-sensitive |
| GCGGACCGTCTGGACGTACGCAGA  | 0 | 10 | RDR2-sensitive |
| GCGGACCTGGTACGATAAGACGTC  | 0 | 9  | RDR2-sensitive |
| GCGGACGACTGCAGGCAGAACCGT  | 0 | 12 | RDR2-sensitive |

|                          |    |    |                |
|--------------------------|----|----|----------------|
| GCGGACGAGAATTGCATGCGCGTA | 0  | 9  | RDR2-sensitive |
| GCGGACGCGGTAGGACGTGGCGTA | 1  | 18 | RDR2-sensitive |
| GCGGACGGGATTCGACGAAATGGA | 0  | 11 | RDR2-sensitive |
| GCGGACGGTGTAGATTTACGGAAG | 1  | 13 | RDR2-sensitive |
| GCGGACGTGGCTTTCTAGCTCGGC | 0  | 10 | RDR2-sensitive |
| GCGGACGTTGTTGGAGGCTTCCAG | 0  | 10 | RDR2-sensitive |
| GCGGACTAGGAGGCAAAATATCAA | 3  | 16 | RDR2-sensitive |
| GCGGACTATCTGTGCCACCGGCGC | 0  | 27 | RDR2-sensitive |
| GCGGACTTGGCATTGCTTTTGCG  | 0  | 9  | RDR2-sensitive |
| GCGGAGAACGTGCTACGTCTGGAC | 0  | 9  | RDR2-sensitive |
| GCGGAGACATCGGAACACGGCTAC | 0  | 12 | RDR2-sensitive |
| GCGGAGACGAACAGAGCAGCTCGA | 0  | 10 | RDR2-sensitive |
| GCGGAGACGGATGCAGAGGCTGCT | 0  | 34 | RDR2-sensitive |
| GCGGAGACGGATGCGGAGGCTGCT | 0  | 11 | RDR2-sensitive |
| GCGGAGACTGCATGGAGTGCGCTA | 0  | 20 | RDR2-sensitive |
| GCGGAGACTGCTGGACTGATGAAT | 0  | 18 | RDR2-sensitive |
| GCGGAGACTGCTGGAGAGCGAAAC | 0  | 15 | RDR2-sensitive |
| GCGGAGAGGCAGATGAATTCGGTC | 0  | 17 | RDR2-sensitive |
| GCGGAGCACGCAATCTGTCTGAGC | 0  | 13 | RDR2-sensitive |
| GCGGAGCAGGGACCAAAGCGCAT  | 0  | 20 | RDR2-sensitive |
| GCGGAGCCTGACAAGGGAGGACAG | 0  | 13 | RDR2-sensitive |
| GCGGAGCCTGATAAGGGAGAACGG | 0  | 22 | RDR2-sensitive |
| GCGGAGCCTGCTGGAGAGCGCAAT | 1  | 22 | RDR2-sensitive |
| GCGGAGCTGTACGACCGGAGGCAG | 0  | 13 | RDR2-sensitive |
| GCGGAGGAAGGATGTCCAGTGCCG | 0  | 14 | RDR2-sensitive |
| GCGGAGGACTGACGCGGCACCGAC | 0  | 17 | RDR2-sensitive |
| GCGGAGGATCTGGCCAAGCGCGTC | 0  | 10 | RDR2-sensitive |
| GCGGAGGATTGCGGTATAGAGTAA | 0  | 13 | RDR2-sensitive |
| GCGGAGGATTGTAGTATAGGGTAG | 0  | 31 | RDR2-sensitive |
| GCGGAGGGACGAGCAAACGAACAG | 0  | 9  | RDR2-sensitive |
| GCGGAGGGAGCGTACGCTGGACGG | 0  | 12 | RDR2-sensitive |
| GCGGAGGTAGAACACAGGGGTGTG | 42 | 4  | RDR2-resistant |
| GCGGAGTAACAGGTGGCAGGACAA | 0  | 11 | RDR2-sensitive |
| GCGGAGTACTGTAGACGCACGGAG | 0  | 41 | RDR2-sensitive |
| GCGGAGTCCGAACGGGTTGACGGT | 0  | 9  | RDR2-sensitive |
| GCGGAGTCTGCTGGAGCGCGCAAC | 0  | 13 | RDR2-sensitive |
| GCGGAGTGCAAATACGGAGTCTGC | 0  | 10 | RDR2-sensitive |
| GCGGAGTGGGATGGGGAGTGTTGC | 2  | 16 | RDR2-sensitive |
| GCGGATAAGTCTATCGGACAGCAT | 0  | 14 | RDR2-sensitive |
| GCGGATACGGACGGATATTAGCTC | 0  | 67 | RDR2-sensitive |
| GCGGATACGTAAGGGCATGTACAG | 0  | 15 | RDR2-sensitive |
| GCGGATACGTTATAGGCTGAGGGA | 19 | 1  | RDR2-resistant |
| GCGGATACTCTAGTGCAGATGGAA | 0  | 9  | RDR2-sensitive |
| GCGGATAGCGACAGAATTGGGCAG | 0  | 13 | RDR2-sensitive |
| GCGGATAGGACAACAGCGGCTGAT | 0  | 17 | RDR2-sensitive |
| GCGGATAGTCTGAAGCAGTGGAGC | 0  | 10 | RDR2-sensitive |
| GCGGATAGTCTGAGAGAGAAGAGT | 0  | 19 | RDR2-sensitive |
| GCGGATCACGACTGCGGTTGGCGT | 0  | 10 | RDR2-sensitive |
| GCGGATCAGGCGTGCAGCTCAGAG | 0  | 17 | RDR2-sensitive |

|                            |     |    |                |
|----------------------------|-----|----|----------------|
| GCGGATCCTGGAAACGACGGAGTA   | 2   | 18 | RDR2-sensitive |
| GCGGATCGACTCCCCTGCAGGGCT   | 80  | 0  | RDR2-resistant |
| GCGGATCGCGACAGTGGAGGCATG   | 0   | 36 | RDR2-sensitive |
| GCGGATCGGCAACACTGCGAAGTC   | 0   | 13 | RDR2-sensitive |
| GCGGATCTCACGCTCGGGGATGGC   | 22  | 0  | RDR2-resistant |
| GCGGATCTCTGATGCAGTGGCTGT   | 0   | 9  | RDR2-sensitive |
| GCGGATCTGGTCGAGATGTGCGAC   | 73  | 7  | RDR2-resistant |
| GCGGATGACAGGCTGCCTCGGCGT   | 0   | 23 | RDR2-sensitive |
| GCGGATGATTGTGGTATAGAGTAA   | 0   | 12 | RDR2-sensitive |
| GCGGATGCTGTTGGACGCATTCAG   | 0   | 48 | RDR2-sensitive |
| GCGGATGGACGTCAAACAGGACAA   | 2   | 98 | RDR2-sensitive |
| GCGGATGGGAATGGCAGAACCGGA   | 0   | 15 | RDR2-sensitive |
| GCGGATGTCCAAGGAGTGCTCGGC   | 1   | 13 | RDR2-sensitive |
| GCGGATGTGGCTTCGACGAAACGG   | 0   | 11 | RDR2-sensitive |
| GCGGATGTGGTTAACGGGCCGGCG   | 0   | 9  | RDR2-sensitive |
| GCGGATGTTGTTGGACGCGGGTAC   | 0   | 11 | RDR2-sensitive |
| GCGGATCCGGTAGTGAGGACGTC    | 0   | 17 | RDR2-sensitive |
| GCGGATTCGGACCAGATGGATTGC   | 0   | 9  | RDR2-sensitive |
| GCGGATTGATCGGGCGGGGGCGGG   | 0   | 15 | RDR2-sensitive |
| GCGGATTGATCGGGCGGGGGCGGT   | 0   | 24 | RDR2-sensitive |
| GCGGATTGCGGCGACGGCGTGGAC   | 0   | 10 | RDR2-sensitive |
| GCGGATTGGCGTTGTGCGGCGAAG   | 0   | 23 | RDR2-sensitive |
| GCGGCAACCGGCAGAACCGTGAC    | 0   | 12 | RDR2-sensitive |
| GCGGCAACTGAAGCGGGTGGTGTC   | 0   | 10 | RDR2-sensitive |
| GCGGCAAGAACACGTA CT CGGCAC | 0   | 24 | RDR2-sensitive |
| GCGGCACACTCACTCGTCGGCTTA   | 0   | 18 | RDR2-sensitive |
| GCGGCACACTGGCCATCTGGCAC    | 1   | 18 | RDR2-sensitive |
| GCGGCACGGAATCGGACGATACAT   | 0   | 19 | RDR2-sensitive |
| GCGGCACGTGATGGATGACGACGG   | 0   | 14 | RDR2-sensitive |
| GCGGCACGTGGACCCATCCGGCAC   | 0   | 12 | RDR2-sensitive |
| GCGGCACGTGGACCGATCGGGCAC   | 0   | 9  | RDR2-sensitive |
| GCGGCACTCACTCGTCGGCCTGAG   | 0   | 9  | RDR2-sensitive |
| GCGGCACTCGACAAAGACGTCTTT   | 0   | 31 | RDR2-sensitive |
| GCGGCAGAGCTCATGATCGTCGAG   | 0   | 16 | RDR2-sensitive |
| GCGGCAGAGCTTATGATCGTCGAG   | 0   | 10 | RDR2-sensitive |
| GCGGCAGCGGCAGAACCATGGAGT   | 1   | 16 | RDR2-sensitive |
| GCGGCAGGGCGCTGGCTCCTTTCC   | 222 | 8  | RDR2-resistant |
| GCGGCATCACGGCGCATGAACCGA   | 1   | 43 | RDR2-sensitive |
| GCGGCATCCTGACCTGACGACTGC   | 29  | 0  | RDR2-resistant |
| GCGGCATGTGGATCGATCGGGCAT   | 0   | 11 | RDR2-sensitive |
| GCGGCATTGGTGGA ACTGGGCGGC  | 1   | 26 | RDR2-sensitive |
| GCGGCCAAGTAGGACTGCTTCCAG   | 0   | 10 | RDR2-sensitive |
| GCGGCCACGGCAGAACAACAGGGT   | 0   | 11 | RDR2-sensitive |
| GCGGCCCAGAACATCTAAGGGCAT   | 4   | 33 | RDR2-sensitive |
| GCGGCCGGTTGCAGAAGTAGGATG   | 0   | 10 | RDR2-sensitive |
| GCGGCCTATGGATAGACACGAGCA   | 0   | 11 | RDR2-sensitive |
| GCGGCCTGTCCAAGCAGA ACTGTC  | 0   | 14 | RDR2-sensitive |
| GCGGCGACAATTTACTCGTCGGTC   | 1   | 21 | RDR2-sensitive |
| GCGGCGACCTTGCGGAGCGACTGG   | 0   | 10 | RDR2-sensitive |

|                             |    |     |                |
|-----------------------------|----|-----|----------------|
| GCGGCGACGAAGAACAACACTCACGGC | 0  | 11  | RDR2-sensitive |
| GCGGCGACGTAGACCAAGAGGGCT    | 4  | 21  | RDR2-sensitive |
| GCGGCGACGTAGATCAAGAGGGCT    | 1  | 16  | RDR2-sensitive |
| GCGGCGAGTGTAGAGAAGGACGGT    | 0  | 10  | RDR2-sensitive |
| GCGGCGAGTTGTAGAGCACGATGG    | 0  | 20  | RDR2-sensitive |
| GCGGCGCAGCAGGACGACGACGAC    | 0  | 13  | RDR2-sensitive |
| GCGGCGCCGCTGTGGTGAGACTGC    | 0  | 11  | RDR2-sensitive |
| GCGGCGCGGAAGCAGACTGGCGAT    | 0  | 9   | RDR2-sensitive |
| GCGGCGTAGGCCTAAGTGACGGCA    | 0  | 11  | RDR2-sensitive |
| GCGGCGTAGGCTTAAGTGCCGGCA    | 0  | 10  | RDR2-sensitive |
| GCGGCGTGGAACAACGGCGATAA     | 0  | 56  | RDR2-sensitive |
| GCGGCGTGGAACCGGAGCGGTGA     | 0  | 9   | RDR2-sensitive |
| GCGGCTACAGGAACTCCGGGAGGC    | 0  | 17  | RDR2-sensitive |
| GCGGCTACCGTCGGAACAGTCGGA    | 3  | 74  | RDR2-sensitive |
| GCGGCTACGTAGATCAAGAGGGCT    | 2  | 16  | RDR2-sensitive |
| GCGGCTAGGCCGATCGGGGACGGT    | 0  | 10  | RDR2-sensitive |
| GCGGCTAGGGCTCCTGCCTGACGG    | 1  | 25  | RDR2-sensitive |
| GCGGCTCAGCTCGGATCGGATCGG    | 0  | 9   | RDR2-sensitive |
| GCGGCTCTGGTCAGACTGTGGCAT    | 0  | 12  | RDR2-sensitive |
| GCGGCTGAACCGAACGTGGCGTT     | 0  | 19  | RDR2-sensitive |
| GCGGCTGAACTGCGGCGATGGCGC    | 0  | 13  | RDR2-sensitive |
| GCGGCTGACATGAATATGGCGAGC    | 1  | 42  | RDR2-sensitive |
| GCGGCTGCGGCTTCTACAGTATTT    | 10 | 142 | RDR2-sensitive |
| GCGGCTGGAGTAGAGACCGGTGTG    | 0  | 14  | RDR2-sensitive |
| GCGGCTGGGACTTCTGCCTGACGG    | 2  | 57  | RDR2-sensitive |
| GCGGCTTAGACACGACGTGGCGTC    | 0  | 64  | RDR2-sensitive |
| GCGGGAACCAGCAGAACGTGCACC    | 0  | 11  | RDR2-sensitive |
| GCGGGAAGCCTACGGCACTGAGTA    | 0  | 15  | RDR2-sensitive |
| GCGGGAAGCCTACGGCACTGGATA    | 1  | 53  | RDR2-sensitive |
| GCGGGAAGTGGACATACGGTACGA    | 0  | 14  | RDR2-sensitive |
| GCGGGACAACAAAGACAGGGACGT    | 0  | 53  | RDR2-sensitive |
| GCGGGACAACACTAGGATAGAGACGT  | 0  | 28  | RDR2-sensitive |
| GCGGGACAAGAACACGAAGGCCGC    | 0  | 16  | RDR2-sensitive |
| GCGGGACAATCAAGATAGGGACGT    | 0  | 11  | RDR2-sensitive |
| GCGGGACACCCAGGACAGGGACGT    | 0  | 15  | RDR2-sensitive |
| GCGGGACAGACAGGACAGAGACGT    | 0  | 9   | RDR2-sensitive |
| GCGGGACAGACAGGATAGAGACGT    | 0  | 16  | RDR2-sensitive |
| GCGGGACAGCCAGGACAGAGACGT    | 1  | 29  | RDR2-sensitive |
| GCGGGACAGCCAGGACAGGGACGT    | 1  | 26  | RDR2-sensitive |
| GCGGGACAGCTAGGACAGGGACGT    | 0  | 14  | RDR2-sensitive |
| GCGGGACAGTCAGGACAGAGACGT    | 0  | 28  | RDR2-sensitive |
| GCGGGACAGTCAGGACAGGGACGT    | 0  | 27  | RDR2-sensitive |
| GCGGGACAGTTAGGACAGAGACGT    | 2  | 37  | RDR2-sensitive |
| GCGGGACAGTTAGGATAGAGACGT    | 0  | 14  | RDR2-sensitive |
| GCGGGACCGAGGACGGGACAGGCC    | 10 | 49  | RDR2-sensitive |
| GCGGGACGAAAACGAAAACGGGAT    | 0  | 13  | RDR2-sensitive |
| GCGGGACGAACACGAAGGCCACGG    | 0  | 12  | RDR2-sensitive |
| GCGGGACGAGTGAATATAGGGGAT    | 5  | 22  | RDR2-sensitive |
| GCGGGACGGCTGACGGACGACGCA    | 0  | 24  | RDR2-sensitive |

|                           |    |    |                |
|---------------------------|----|----|----------------|
| GCGGGACTGCATGATGCGTACGGC  | 0  | 20 | RDR2-sensitive |
| GCGGGACTGCCACGTCAGGAAGCT  | 0  | 9  | RDR2-sensitive |
| GCGGGACTGCGGCAGCCTCACGGA  | 0  | 24 | RDR2-sensitive |
| GCGGGACTGCGTGCTACGTACGGC  | 0  | 10 | RDR2-sensitive |
| GCGGGACTGTACGACCGGAGGCAG  | 0  | 14 | RDR2-sensitive |
| GCGGGAGAACCAGTCAGAGAGCGT  | 0  | 9  | RDR2-sensitive |
| GCGGGAGACTGGCTCTAGTGATGT  | 0  | 20 | RDR2-sensitive |
| GCGGGAGAGAGAACCGGTCGGCGT  | 0  | 10 | RDR2-sensitive |
| GCGGGAGCCTGACTCTAGAGATGC  | 0  | 11 | RDR2-sensitive |
| GCGGGAGCTAAGTGAATGTCGGAG  | 0  | 10 | RDR2-sensitive |
| GCGGGAGCTGAGAGATGACGCGAC  | 1  | 12 | RDR2-sensitive |
| GCGGGAGCTGCAGCGGTAAACTGT  | 0  | 14 | RDR2-sensitive |
| GCGGGAGCTGCTGGAGACGTCTAC  | 0  | 56 | RDR2-sensitive |
| GCGGGAGGCAGAACGTGCACCACC  | 0  | 9  | RDR2-sensitive |
| GCGGGAGGGACGAAGACGAAGCGT  | 0  | 47 | RDR2-sensitive |
| GCGGGAGGGACGAAGACGGACGAA  | 0  | 27 | RDR2-sensitive |
| GCGGGAGTGTACAGCGCGATGGCA  | 0  | 20 | RDR2-sensitive |
| GCGGGAGTTTGGCTACTGTATTTT  | 0  | 15 | RDR2-sensitive |
| GCGGGATAGCCAGGACAGAGACGT  | 0  | 19 | RDR2-sensitive |
| GCGGGATCTGGATTCGCGGCGAAT  | 0  | 14 | RDR2-sensitive |
| GCGGGATGAGAACGGAGCGGCTCC  | 0  | 11 | RDR2-sensitive |
| GCGGGATGGACTGCGGGATCGGAC  | 2  | 48 | RDR2-sensitive |
| GCGGGATGGGAACGGAGCGGCTCC  | 1  | 22 | RDR2-sensitive |
| GCGGGATGGTTCCGGATCTGAGGA  | 0  | 15 | RDR2-sensitive |
| GCGGGATTGGAACGGAGCGGCTCC  | 0  | 59 | RDR2-sensitive |
| GCGGGATTGGACGGCTGAGATTGT  | 0  | 9  | RDR2-sensitive |
| GCGGGCAGGGGCAGCGTAGAGAGG  | 0  | 12 | RDR2-sensitive |
| GCGGGCCCCACAAGTCAGAAGCTCC | 0  | 32 | RDR2-sensitive |
| GCGGGCCCCAGAATTTGGAGGATGG | 21 | 0  | RDR2-resistant |
| GCGGGCCCTGAGTGTAGAGGAGGT  | 0  | 11 | RDR2-sensitive |
| GCGGGCGAGTCTCTGGCGCGTGCA  | 0  | 10 | RDR2-sensitive |
| GCGGGCGCGGCAGAACGTGCGAGT  | 0  | 27 | RDR2-sensitive |
| GCGGGCGCGGCAGAATAGAGGAGA  | 1  | 17 | RDR2-sensitive |
| GCGGGCGGGATGCGGCAGAACAGT  | 0  | 18 | RDR2-sensitive |
| GCGGGCGTTTCGGTAGAGCGGGGGC | 0  | 61 | RDR2-sensitive |
| GCGGGCGTTTGGTAGAGCGGGGGC  | 0  | 30 | RDR2-sensitive |
| GCGGGCTACTGTAGCTTGGATGGC  | 0  | 13 | RDR2-sensitive |
| GCGGGCTAGAACGAGGCAGCTCGG  | 0  | 18 | RDR2-sensitive |
| GCGGGCTAGCACGGCATGGCACGG  | 0  | 9  | RDR2-sensitive |
| GCGGGCTAGTACGGCACGACCTGT  | 0  | 64 | RDR2-sensitive |
| GCGGGCTCTGACTCAGGCATCCGC  | 0  | 15 | RDR2-sensitive |
| GCGGGCTGACAACGCGCGGGGGCA  | 0  | 13 | RDR2-sensitive |
| GCGGGCTGACGTCATCCGCGACAC  | 0  | 10 | RDR2-sensitive |
| GCGGGCTGCAGGCAGAACCGTGCA  | 0  | 11 | RDR2-sensitive |
| GCGGGCTGCGTCCTGACGGAGGTA  | 0  | 10 | RDR2-sensitive |
| GCGGGCTGGATCGGCGCAGTAGCT  | 0  | 11 | RDR2-sensitive |
| GCGGGCTGGGAACGGAGCGGCTCC  | 0  | 14 | RDR2-sensitive |
| GCGGGCTGGGACAAGGCATGACAC  | 0  | 93 | RDR2-sensitive |
| GCGGGCTGGTTGACGCGGTCTAAG  | 0  | 14 | RDR2-sensitive |

|                          |    |     |                |
|--------------------------|----|-----|----------------|
| GCGGGCTGTGCGATGCGCGGGATG | 0  | 14  | RDR2-sensitive |
| GCGGGCTTATAGGACTGAGTCGGC | 0  | 12  | RDR2-sensitive |
| GCGGGCTTGACAGGAACTAGGC   | 6  | 121 | RDR2-sensitive |
| GCGGGGACGAGGACGAGACAGGCG | 7  | 29  | RDR2-sensitive |
| GCGGGGACGATGCAGGAACGACGC | 0  | 10  | RDR2-sensitive |
| GCGGGGATGGTCGTTGGCAGCCGG | 45 | 1   | RDR2-resistant |
| GCGGGGGCAGTCTACGGTACTCTC | 0  | 12  | RDR2-sensitive |
| GCGGGGTAGATCTGAGCAAGACGT | 0  | 16  | RDR2-sensitive |
| GCGGGGTTGATGTTGGACAACACA | 78 | 7   | RDR2-resistant |
| GCGGGTAACCAATCGGACGGTATA | 0  | 10  | RDR2-sensitive |
| GCGGGTAGGAAGCGAGGACAGTCT | 0  | 12  | RDR2-sensitive |
| GCGGGTCGGGTTTTGTTCCGGTAT | 0  | 9   | RDR2-sensitive |
| GCGGGTGAGGGAAGCGAGCGGCC  | 4  | 18  | RDR2-sensitive |
| GCGGGTGAGTGAGCGGTAGAAGAT | 92 | 0   | RDR2-resistant |
| GCGGGTTGAGAACGAAGCGGCTCC | 0  | 20  | RDR2-sensitive |
| GCGGGTTTGACAGGAACTAGGC   | 0  | 11  | RDR2-sensitive |
| GCGGGTTTTCTGAAGCTAGTGGAA | 13 | 31  | RDR2-sensitive |
| GCGGTAAACCCTAGCGTCGGCGGC | 1  | 20  | RDR2-sensitive |
| GCGGTACACCGTTGGATATTGGAT | 0  | 9   | RDR2-sensitive |
| GCGGTACATGTGGAGGGTTGGCTC | 0  | 12  | RDR2-sensitive |
| GCGGTACCAACGGCGATACTCGAA | 0  | 32  | RDR2-sensitive |
| GCGGTACCCTCGGATTCGGCAGAC | 0  | 27  | RDR2-sensitive |
| GCGGTACGGTATGAGACGAGCTAC | 0  | 10  | RDR2-sensitive |
| GCGGTACTGGACTGTCCGGTGTC  | 0  | 12  | RDR2-sensitive |
| GCGGTAGAACCACCAGAAGATCAA | 0  | 33  | RDR2-sensitive |
| GCGGTAGACGACAGGGACGGACAT | 0  | 13  | RDR2-sensitive |
| GCGGTAGGGGTGGAGGGCGTTGGG | 14 | 0   | RDR2-resistant |
| GCGGTCAAACAGAAACAGGGACAT | 0  | 16  | RDR2-sensitive |
| GCGGTCCGGACTGTCCGCGGTGGG | 0  | 10  | RDR2-sensitive |
| GCGGTCCGGACTGTCCGCGGTGGT | 6  | 43  | RDR2-sensitive |
| GCGGTGCTGTAGACGGTGCGCAA  | 0  | 9   | RDR2-sensitive |
| GCGGTGCTTCTTTTGTGGACGGT  | 0  | 10  | RDR2-sensitive |
| GCGGTGCGGAGCTGTGCGGTGGG  | 0  | 10  | RDR2-sensitive |
| GCGGTCTATTCGCTGTAGATGGGC | 0  | 36  | RDR2-sensitive |
| GCGGTCTGACTCAACAGGAGCGAT | 0  | 10  | RDR2-sensitive |
| GCGGTCTGACTCAACGGGAGCGAT | 1  | 17  | RDR2-sensitive |
| GCGGTCTGAGTGCAGGAGCGACGC | 0  | 17  | RDR2-sensitive |
| GCGGTCTGTACCGAAGGAGATGTG | 0  | 10  | RDR2-sensitive |
| GCGGTCTTTGGTGTACATGTTGAA | 16 | 0   | RDR2-resistant |
| GCGGTGAGGCCTGGACGCGAACGG | 2  | 20  | RDR2-sensitive |
| GCGGTGCGATACTCACGACGGTTT | 0  | 38  | RDR2-sensitive |
| GCGGTGCTCTCTGGTCAGGCGCGG | 2  | 21  | RDR2-sensitive |
| GCGGTGCTGCAGAGCGGTATCTGT | 0  | 32  | RDR2-sensitive |
| GCGGTGCTTTTGGGTAGGACGGTG | 2  | 21  | RDR2-sensitive |
| GCGGTGGGCCTGAACACGAGCGAC | 0  | 18  | RDR2-sensitive |
| GCGGTGTATTATGAAGAGCGGCAA | 0  | 63  | RDR2-sensitive |
| GCGGTGTGGTAGTTACGTGGACGG | 0  | 21  | RDR2-sensitive |
| GCGGTGTGTGTGGAACGGCGCGG  | 0  | 56  | RDR2-sensitive |
| GCGGTGTGTGTGGAACGGCGCGT  | 0  | 60  | RDR2-sensitive |

|                           |    |     |                |
|---------------------------|----|-----|----------------|
| GCGGTTAAGGCTCTCTGCTTCGGC  | 72 | 8   | RDR2-resistant |
| GCGGTTATCGCGGAAGGAAGGCGT  | 0  | 16  | RDR2-sensitive |
| GCGGTTCTTGTGTAGTGATTGGCG  | 0  | 15  | RDR2-sensitive |
| GCGGTTGGCACTGCGGTCTTTGGT  | 26 | 0   | RDR2-resistant |
| GCGTACAACTCAGGGACAGGGCAG  | 0  | 37  | RDR2-sensitive |
| GCGTACACAAGTGTACCCGTCGG   | 0  | 10  | RDR2-sensitive |
| GCGTACACAAGTGTGACTCGTCGA  | 0  | 21  | RDR2-sensitive |
| GCGTACAGATGTAGAGTCAGGCTC  | 0  | 14  | RDR2-sensitive |
| GCGTACAGGAGAGCCGAGGGCGTG  | 0  | 18  | RDR2-sensitive |
| GCGTACAGGAGGGCCGAGGACGTG  | 1  | 21  | RDR2-sensitive |
| GCGTACAGGAGGGCCGAGGGCGTG  | 1  | 22  | RDR2-sensitive |
| GCGTACCCGAGGACGAAGACGCCG  | 0  | 13  | RDR2-sensitive |
| GCGTACGAAGCGAACACACTGGCG  | 0  | 11  | RDR2-sensitive |
| GCGTACGAGGATGGGCAGAACCGT  | 0  | 15  | RDR2-sensitive |
| GCGTAGAACGGCGTCGACACCAAT  | 0  | 17  | RDR2-sensitive |
| GCGTAGACTGCGTATAGGCTTACT  | 0  | 12  | RDR2-sensitive |
| GCGTAGACTGTTGATAGGGCACAA  | 1  | 20  | RDR2-sensitive |
| GCGTAGAGAGCGCTGTAGGGGCAC  | 0  | 11  | RDR2-sensitive |
| GCGTAGAGGGCGCTGTAGAGGGCA  | 0  | 19  | RDR2-sensitive |
| GCGTAGAGGGCGCTGTAGGAGGCA  | 0  | 12  | RDR2-sensitive |
| GCGTAGAGGGCGCTGTAGGGGGCA  | 0  | 31  | RDR2-sensitive |
| GCGTAGAGGGCGCTGTAGGGTGTC  | 0  | 13  | RDR2-sensitive |
| GCGTAGATATACCTGACTGGGGCT  | 5  | 101 | RDR2-sensitive |
| GCGTAGATGGCAGAACCAGAGCGG  | 0  | 19  | RDR2-sensitive |
| GCGTAGATTCTCCATCGAAGCCGT  | 0  | 9   | RDR2-sensitive |
| GCGTAGGACAACAGGTTGATTCGT  | 0  | 9   | RDR2-sensitive |
| GCGTAGGACAGTTCGGCAAGGCCG  | 0  | 25  | RDR2-sensitive |
| GCGTAGGACAGTTCGGCTAGGCCA  | 7  | 80  | RDR2-sensitive |
| GCGTAGGACAGTTCGGCTAGGCCC  | 0  | 9   | RDR2-sensitive |
| GCGTAGGACAGTTCGGCTAGGCCG  | 0  | 28  | RDR2-sensitive |
| GCGTAGGACGTAACCCGGAAGCGG  | 0  | 16  | RDR2-sensitive |
| GCGTAGGACGTAACCCGGTAGCGG  | 0  | 10  | RDR2-sensitive |
| GCGTAGGACGTAACTCGGGAGCGG  | 0  | 9   | RDR2-sensitive |
| GCGTAGGACTCTTCGGATGTTCCGG | 0  | 12  | RDR2-sensitive |
| GCGTAGGACTTTGCCGAGTGCCGC  | 0  | 32  | RDR2-sensitive |
| GCGTAGGAGGCGCTGTAGGGGCAC  | 0  | 54  | RDR2-sensitive |
| GCGTAGGCTCGAACTCCGACGGTG  | 0  | 55  | RDR2-sensitive |
| GCGTAGGGCTCATCTCAGCCAGGC  | 0  | 9   | RDR2-sensitive |
| GCGTAGGGGACGCTGTAGGGGCAC  | 0  | 75  | RDR2-sensitive |
| GCGTAGGGGGCGCTGTAGGGGCAC  | 0  | 44  | RDR2-sensitive |
| GCGTAGGGTCGCTGTAGGGGGCAC  | 0  | 9   | RDR2-sensitive |
| GCGTAGGTTCCGCCTGGGTGCATT  | 2  | 27  | RDR2-sensitive |
| GCGTAGTAGCTGACTGCGGGGACG  | 0  | 21  | RDR2-sensitive |
| GCGTAGTCGAACTCGAGGTGGCAC  | 0  | 9   | RDR2-sensitive |
| GCGTAGTGGGCGCTGTAGGGGCAC  | 1  | 62  | RDR2-sensitive |
| GCGTAGTTGGGTTGACTCGACGGT  | 0  | 9   | RDR2-sensitive |
| GCGTATAGCGTTGGACAGTCCGGA  | 0  | 15  | RDR2-sensitive |
| GCGTATGGTGCCTGTAGGAGGCA   | 0  | 13  | RDR2-sensitive |
| GCGTCATCGTAGATCGTCCGGCAC  | 3  | 32  | RDR2-sensitive |

|                           |    |    |                |
|---------------------------|----|----|----------------|
| GCGTCTCGAGACATACTGACGGAT  | 0  | 11 | RDR2-sensitive |
| GCGTCTGATCGTGGAGGACGTGCA  | 0  | 10 | RDR2-sensitive |
| GCGTCTGTCCAACCTGGCTGACGG  | 0  | 11 | RDR2-sensitive |
| GCGTCTTTGGAAGGCTGTAGTCGG  | 7  | 30 | RDR2-sensitive |
| GCGTGAAC TTGTTGGGCGGAGACG | 0  | 13 | RDR2-sensitive |
| GCGTGAAGCTTGATCCTGTCCGAA  | 0  | 10 | RDR2-sensitive |
| GCGTGACAAGGACTGTGCCGGCGT  | 0  | 16 | RDR2-sensitive |
| GCGTGACAGTTAGAACAGAGACGT  | 0  | 9  | RDR2-sensitive |
| GCGTGACATCCTCTGATCCGGCGC  | 1  | 43 | RDR2-sensitive |
| GCGTGACGACTAGGCAGTGGGCAA  | 3  | 21 | RDR2-sensitive |
| GCGTGACGGACGACGGTGCCACAA  | 0  | 9  | RDR2-sensitive |
| GCGTGACTGACGAGCTAAGGCTGA  | 1  | 16 | RDR2-sensitive |
| GCGTGACTGTGAGAGCGGGATGGG  | 1  | 52 | RDR2-sensitive |
| GCGTGAGATGGCAAATAGCTCTGT  | 0  | 9  | RDR2-sensitive |
| GCGTGAGATGGCAAGTAGCTCTAT  | 0  | 12 | RDR2-sensitive |
| GCGTGATCGAGTCGCTCGTATGGA  | 0  | 15 | RDR2-sensitive |
| GCGTGATGACTGGGCAGTGGGCAA  | 1  | 12 | RDR2-sensitive |
| GCGTGATTACGGACGGACGGTGC   | 0  | 10 | RDR2-sensitive |
| GCGTGCAGATGGATGGTAGAATAT  | 0  | 10 | RDR2-sensitive |
| GCGTGCATCTAGCCCGTGTCCGAC  | 4  | 38 | RDR2-sensitive |
| GCGTGCATGTAGAAGTGGTGGTAA  | 0  | 21 | RDR2-sensitive |
| GCGTGCCACCGGCTAGGTGCTCGT  | 0  | 17 | RDR2-sensitive |
| GCGTGCGATGTAGTGGGACAGGGC  | 0  | 9  | RDR2-sensitive |
| GCGTGCGCAGAACAGATTAGGGTT  | 5  | 28 | RDR2-sensitive |
| GCGTGCGCGGACTGTCCGGCCTAG  | 0  | 16 | RDR2-sensitive |
| GCGTGCGGGCTGTTCTGTGGCGGGC | 0  | 9  | RDR2-sensitive |
| GCGTGCGGGTAGGAAGCGAGGACA  | 0  | 19 | RDR2-sensitive |
| GCGTGCTGGGCTGCTGAGGGCGGGG | 0  | 10 | RDR2-sensitive |
| GCGTGCTGTAGAAGCGTTGTGGCT  | 0  | 13 | RDR2-sensitive |
| GCGTGGACACGGACGGCAAGACTC  | 0  | 12 | RDR2-sensitive |
| GCGTGGACTGTCTATGCATTTCT   | 0  | 9  | RDR2-sensitive |
| GCGTGGAGGGGCTTGTAGGGGGCT  | 0  | 9  | RDR2-sensitive |
| GCGTGGATCTGAGCAGCCAAGCAG  | 0  | 18 | RDR2-sensitive |
| GCGTGGATTGTTGGTTTTGGCTAC  | 15 | 0  | RDR2-resistant |
| GCGTGGCCCTGTAGCTATCGGTAA  | 0  | 17 | RDR2-sensitive |
| GCGTGGCTGTAGGTGGGACCGCAC  | 0  | 17 | RDR2-sensitive |
| GCGTGGGTGTGGAAGCAACAACGG  | 0  | 9  | RDR2-sensitive |
| GCGTGTAAC TCGAGCTCGACGACA | 0  | 9  | RDR2-sensitive |
| GCGTGTAGACGGTGGACTGTTCTGT | 0  | 35 | RDR2-sensitive |
| GCGTGTAGTGAAGCCGCCGGTCTGT | 0  | 10 | RDR2-sensitive |
| GCGTGTATCTAGCCCGTGTCCGAC  | 0  | 9  | RDR2-sensitive |
| GCGTGTCAGGATAAGGTGTCAGGC  | 1  | 44 | RDR2-sensitive |
| GCGTGTGGAGACGGTGGCAGAACC  | 0  | 13 | RDR2-sensitive |
| GCGTGTGTAGAAGCGACGGAGTTC  | 1  | 18 | RDR2-sensitive |
| GCGTTAACTCGCGACTGTGGTCTGT | 0  | 24 | RDR2-sensitive |
| GCGTTAACTGTGTGTGAGTCGGTG  | 0  | 9  | RDR2-sensitive |
| GCGTTATACGGAGTCGGATGCCGA  | 0  | 20 | RDR2-sensitive |
| GCGTTCGAACTCTGGAAGTAGCGT  | 0  | 10 | RDR2-sensitive |
| GCGTTCCGGTAGAGCGGGGGCAGTC | 0  | 13 | RDR2-sensitive |



|                           |    |    |                |
|---------------------------|----|----|----------------|
| GCGTTCGGTGCGGACCGACGGCTC  | 0  | 10 | RDR2-sensitive |
| GCGTTGACGGCAGAACCGTGCACC  | 0  | 11 | RDR2-sensitive |
| GCGTTGCTCGGATCTAGACGGTTG  | 0  | 16 | RDR2-sensitive |
| GCGTTGGCACAAACGGACGTCGTG  | 0  | 15 | RDR2-sensitive |
| GCGTTGTAGACAAGGATGTCGGGT  | 0  | 10 | RDR2-sensitive |
| GCGTTTACCGTCGAGTCGTGCAAC  | 0  | 12 | RDR2-sensitive |
| GCGTTTCCTGTAGTGTACGGCATA  | 0  | 60 | RDR2-sensitive |
| GCGTTTTCTGTAGTGCAAGGCGGT  | 0  | 10 | RDR2-sensitive |
| GCTAAAGGACTACAGAGGACAGTC  | 1  | 18 | RDR2-sensitive |
| GCTAAAGGCTTTAGCGACCGACAT  | 0  | 11 | RDR2-sensitive |
| GCTAAATTTGGCGGACAGGACGGT  | 0  | 9  | RDR2-sensitive |
| GCTAACACCGGACAAGCAGCGCAT  | 0  | 9  | RDR2-sensitive |
| GCTAACAGACGTGGAACAGGTGGC  | 1  | 60 | RDR2-sensitive |
| GCTAACAGACGTGGGACAGATGGC  | 0  | 11 | RDR2-sensitive |
| GCTAACAGACGTGGGACAGGTGGC  | 11 | 53 | RDR2-sensitive |
| GCTAACAGACGTGGGGCAGGTGGC  | 13 | 42 | RDR2-sensitive |
| GCTAACAGTCGGCGTGTCTGTGCAT | 0  | 29 | RDR2-sensitive |
| GCTAACCCGGCTTGTAGTTGTGCT  | 2  | 15 | RDR2-sensitive |
| GCTAACCGGCGGAATCGACGACAC  | 1  | 39 | RDR2-sensitive |
| GCTAACCGGCGGAATCGACGACGC  | 0  | 16 | RDR2-sensitive |
| GCTAACCGGTGGAATCGACGACAC  | 0  | 23 | RDR2-sensitive |
| GCTAACGCGGTCCAGGCTCGGCAC  | 0  | 10 | RDR2-sensitive |
| GCTAACGCGGTTTAGGCTCGGCAC  | 0  | 21 | RDR2-sensitive |
| GCTAACGGAATGGCATGGCAGAGT  | 0  | 10 | RDR2-sensitive |
| GCTAACTGTTGGGGCGAAGGCATA  | 0  | 10 | RDR2-sensitive |
| GCTAAGTCGGGTAGCGCGGGCATG  | 1  | 47 | RDR2-sensitive |
| GCTAATCTGTAGGATAGTATGGTC  | 1  | 15 | RDR2-sensitive |
| GCTAATGAGCCGGACGGTCCACAC  | 0  | 11 | RDR2-sensitive |
| GCTAATGTCGTACGGGCACACAGA  | 70 | 0  | RDR2-resistant |
| GCTAATTCATGTCGGGCCGGCACG  | 0  | 10 | RDR2-sensitive |
| GCTACAACGAGACTGCGGACGAGC  | 10 | 28 | RDR2-sensitive |
| GCTACACAAGTGTGGAAC TTCGGC | 45 | 0  | RDR2-resistant |
| GCTACACCTGATTGTCATCGTCGT  | 0  | 14 | RDR2-sensitive |
| GCTACAGGTGTGGTAAGTCTGGTC  | 60 | 0  | RDR2-resistant |
| GCTACAGTCGGCGACACCGTCCTA  | 0  | 25 | RDR2-sensitive |
| GCTACAGTTACGGTCTGCAGGAGA  | 0  | 9  | RDR2-sensitive |
| GCTACATATGTAGGGTCGGCTCGG  | 0  | 14 | RDR2-sensitive |
| GCTACATTTGGCGTCGGTGC GGCT | 0  | 15 | RDR2-sensitive |
| GCTACCCGACGGACTGTTCCGGTGC | 3  | 26 | RDR2-sensitive |
| GCTACCGGACCGGCTCGACACGGC  | 0  | 9  | RDR2-sensitive |
| GCTACCTGCCGCGCTGTCGTCCAC  | 0  | 9  | RDR2-sensitive |
| GCTACGAACTGGGGA ACTGCCGGA | 0  | 10 | RDR2-sensitive |
| GCTACGAGCGAGATCTTGTCCGGT  | 0  | 9  | RDR2-sensitive |
| GCTACGGACTTAAACGGGTCGGAT  | 0  | 11 | RDR2-sensitive |
| GCTACGGGCTGAAGACCAGTTGGC  | 0  | 9  | RDR2-sensitive |
| GCTACGGTTGTTAGCTATATTCGC  | 0  | 11 | RDR2-sensitive |
| GCTACGTCTGCAGCAAGA ACCGGT | 0  | 20 | RDR2-sensitive |
| GCTACTAAAGAAGCTATTGTCCGGT | 19 | 0  | RDR2-resistant |
| GCTACTCTGAGCTGCAGCGGGCGA  | 0  | 49 | RDR2-sensitive |

|                           |    |    |                |
|---------------------------|----|----|----------------|
| GCTACTCTGTTGGATGGAAGATGC  | 2  | 55 | RDR2-sensitive |
| GCTACTGAGTACTGATCGGTCGGT  | 0  | 12 | RDR2-sensitive |
| GCTACTGGAGAACGTAGAGGACCG  | 0  | 10 | RDR2-sensitive |
| GCTACTGTAGATCGACGAAGGCAA  | 0  | 28 | RDR2-sensitive |
| GCTACTGTAGTTCACGGGCCGGCC  | 1  | 31 | RDR2-sensitive |
| GCTACTGTTGCAGTTTGGACGGAC  | 0  | 13 | RDR2-sensitive |
| GCTACTGTTGTATGGACCCGGCGC  | 0  | 11 | RDR2-sensitive |
| GCTAGAACAGAGCGGTCGCGACGA  | 0  | 10 | RDR2-sensitive |
| GCTAGAACTGATCCGGCTCTGGAA  | 0  | 17 | RDR2-sensitive |
| GCTAGAAGACAAGGTAGATCGGTA  | 26 | 1  | RDR2-resistant |
| GCTAGACCTGGACGTAGAAAGGAG  | 0  | 10 | RDR2-sensitive |
| GCTAGACGACATGGAGGAAGCTGC  | 0  | 9  | RDR2-sensitive |
| GCTAGACGTAGTTACTGCGACCGA  | 0  | 14 | RDR2-sensitive |
| GCTAGACTCGTACCTCGACGCCAT  | 0  | 32 | RDR2-sensitive |
| GCTAGAGGACGGTTTCGATGGACC  | 0  | 12 | RDR2-sensitive |
| GCTAGATCAGGTCGTAGGGATGGT  | 0  | 12 | RDR2-sensitive |
| GCTAGATCCGGACTGGGTGTTGGC  | 31 | 65 | RDR2-sensitive |
| GCTAGATCGAGACGAGTAAGGCAA  | 0  | 16 | RDR2-sensitive |
| GCTAGATCTACTGGACGACGAGCG  | 0  | 9  | RDR2-sensitive |
| GCTAGATGGCAGAACGGCAGAACA  | 0  | 32 | RDR2-sensitive |
| GCTAGATGGTGATCGTGCGGCCAA  | 0  | 10 | RDR2-sensitive |
| GCTAGCAGTAGACGAAGAACGCAC  | 0  | 22 | RDR2-sensitive |
| GCTAGCCGCTGAAGACTGGATGTA  | 0  | 23 | RDR2-sensitive |
| GCTAGCCGTTGGACTCATGGCACA  | 0  | 9  | RDR2-sensitive |
| GCTAGCCTCGGACGAGCCGGCCTC  | 0  | 38 | RDR2-sensitive |
| GCTAGCGACGAGGACTGACGCGGA  | 0  | 24 | RDR2-sensitive |
| GCTAGCTGAAGAAGGACGAGCAAT  | 0  | 9  | RDR2-sensitive |
| GCTAGCTGAAGTAGGACGAGCGAC  | 0  | 18 | RDR2-sensitive |
| GCTAGCTGGAGACGAAGCTCGGAA  | 0  | 15 | RDR2-sensitive |
| GCTAGGACGTAGGGTGTTACGCAT  | 0  | 19 | RDR2-sensitive |
| GCTAGGAGCCTAGGACAACGGTGA  | 0  | 11 | RDR2-sensitive |
| GCTAGGAGCCTAGGACGACGGTGA  | 1  | 47 | RDR2-sensitive |
| GCTAGGAGCTTAGAACGACGGTGA  | 0  | 12 | RDR2-sensitive |
| GCTAGGAGCTTAGGACGACGGTGA  | 0  | 28 | RDR2-sensitive |
| GCTAGGATCCTAGGACGACGGTGA  | 0  | 22 | RDR2-sensitive |
| GCTAGGCAGACAGATACTCGGCAA  | 2  | 20 | RDR2-sensitive |
| GCTAGGCTGTAGGGGGCACCCCTAT | 0  | 36 | RDR2-sensitive |
| GCTAGGGAACCTGGATTACACGGCT | 0  | 22 | RDR2-sensitive |
| GCTAGGGGTTTCGGACATATGGCAC | 0  | 19 | RDR2-sensitive |
| GCTAGGGTGGACTGCAGCAGCCGG  | 0  | 9  | RDR2-sensitive |
| GCTAGGTAGGCGGCATGTAGGGCA  | 0  | 10 | RDR2-sensitive |
| GCTAGGTCGCGGACCGTCCGGCCC  | 0  | 10 | RDR2-sensitive |
| GCTAGGTCTAAGGGTAGGGGTGGA  | 15 | 0  | RDR2-resistant |
| GCTAGTAACTGTTTTTCTTGGC    | 22 | 0  | RDR2-resistant |
| GCTAGTACTGTAGCACCGGTAGGA  | 0  | 60 | RDR2-sensitive |
| GCTAGTACTGTAGCACCGGTAGGG  | 0  | 12 | RDR2-sensitive |
| GCTAGTAGAACGGACGGACGGTGC  | 2  | 36 | RDR2-sensitive |
| GCTAGTAGCAAGGTCTCGGGCAGC  | 0  | 38 | RDR2-sensitive |
| GCTAGTATGCCATCGGACCCACAA  | 0  | 13 | RDR2-sensitive |

|                          |    |     |                |
|--------------------------|----|-----|----------------|
| GCTAGTCATATGGGCTTTGACGGA | 0  | 11  | RDR2-sensitive |
| GCTAGTCATGTGGGATTTGATGGA | 0  | 11  | RDR2-sensitive |
| GCTAGTCATGTGGGATTTGGCGGA | 0  | 19  | RDR2-sensitive |
| GCTAGTCCTAGACTGTCTCGGCAA | 2  | 38  | RDR2-sensitive |
| GCTAGTGGGATTGGGATAGGAGGA | 0  | 9   | RDR2-sensitive |
| GCTAGTTCGTCGTTGTTTCGTCAT | 0  | 9   | RDR2-sensitive |
| GCTATACTGCATGCACTCAGCCAG | 0  | 11  | RDR2-sensitive |
| GCTATACTGGACTAGGGGCGTAAG | 0  | 11  | RDR2-sensitive |
| GCTATAGACGGCTACTGACGACAC | 0  | 10  | RDR2-sensitive |
| GCTATAGACGGCTGTTGACGGTCC | 0  | 30  | RDR2-sensitive |
| GCTATATTTGGCGGACAGGAGGCT | 0  | 11  | RDR2-sensitive |
| GCTATCACTGTGAACTATCCGGCC | 3  | 27  | RDR2-sensitive |
| GCTATCCTTGTCGGCATGTCGGAT | 0  | 9   | RDR2-sensitive |
| GCTATCCTTTTTTTGGTGGTCGTC | 42 | 2   | RDR2-resistant |
| GCTATCTCATCGTGGGCTGGGCAA | 0  | 9   | RDR2-sensitive |
| GCTATCTGGCTGAGTCGTCGAGTA | 0  | 18  | RDR2-sensitive |
| GCTATCTGGTCAGGCGCGGACGGT | 0  | 14  | RDR2-sensitive |
| GCTATCTGTGGAGATGTGGATGGT | 3  | 104 | RDR2-sensitive |
| GCTATCTGTTCGCGGACTCGGCC  | 0  | 9   | RDR2-sensitive |
| GCTATGCACTGTGGAAGATTGCAG | 0  | 12  | RDR2-sensitive |
| GCTATGTACGACAAGCTCCGGCGC | 2  | 29  | RDR2-sensitive |
| GCTATGTCCGACGGCATCGTAGAC | 2  | 21  | RDR2-sensitive |
| GCTATTGACGCCTAGGTCTCGGAT | 0  | 24  | RDR2-sensitive |
| GCTATTGACGTCGACTTTATGGAT | 32 | 2   | RDR2-resistant |
| GCTATTGACTGTGCGAGCTTCGGA | 6  | 47  | RDR2-sensitive |
| GCTATTGTCGACTGCTGACGGTGT | 0  | 18  | RDR2-sensitive |
| GCTCAAATGTCTGTCGGGCTCGGC | 2  | 25  | RDR2-sensitive |
| GCTCAACCAGGTTGTGCGGTGCGC | 0  | 10  | RDR2-sensitive |
| GCTCAACGAAGTGTACATCGGCAA | 1  | 14  | RDR2-sensitive |
| GCTCAACGCGGGCAGCGAACGGAA | 0  | 9   | RDR2-sensitive |
| GCTCAAGATGTCGGGCCCAACGG  | 3  | 23  | RDR2-sensitive |
| GCTCACCGGAACTACGAGGACGAT | 0  | 14  | RDR2-sensitive |
| GCTCACGGTATGCGGTGCTAGTGT | 0  | 19  | RDR2-sensitive |
| GCTCACGTGTCGAAGTTGCGCAT  | 1  | 19  | RDR2-sensitive |
| GCTCACGTGCGGACGGTCCGGGCA | 2  | 17  | RDR2-sensitive |
| GCTCACTTTAAATCGTATCGGACA | 0  | 9   | RDR2-sensitive |
| GCTCAGAACTGCACTAGACTTCAT | 0  | 15  | RDR2-sensitive |
| GCTCAGACCCTTGACGACGAACGG | 0  | 9   | RDR2-sensitive |
| GCTCAGACTGGAACAGGCAACCAA | 0  | 9   | RDR2-sensitive |
| GCTCAGCGAACTGTACATCGGCAA | 6  | 86  | RDR2-sensitive |
| GCTCAGCGGACAGAGGAGAAGCAT | 1  | 36  | RDR2-sensitive |
| GCTCAGGAAGATCTTCGGCAACAC | 0  | 12  | RDR2-sensitive |
| GCTCAGGACCCTGACGACAAACGG | 0  | 16  | RDR2-sensitive |
| GCTCAGGACCTTGACGACGGGCAA | 2  | 92  | RDR2-sensitive |
| GCTCAGGATCTAGAAAGTGACGGA | 4  | 30  | RDR2-sensitive |
| GCTCAGTCAGGCTGCATATCCCAC | 0  | 11  | RDR2-sensitive |
| GCTCAGTCGTCACTGTGCCGGCCT | 0  | 22  | RDR2-sensitive |
| GCTCATCGCGGACGAGCACGCCGG | 0  | 15  | RDR2-sensitive |
| GCTCATTGTCGAAGAAGGCAGGA  | 0  | 9   | RDR2-sensitive |

|                           |    |    |                |
|---------------------------|----|----|----------------|
| GCTCCAAATCGTCAACGGTCGGCT  | 1  | 16 | RDR2-sensitive |
| GCTCCAACAGCCAGGACGTCGGTC  | 0  | 10 | RDR2-sensitive |
| GCTCCAACGGTCGGAACCCAACGG  | 2  | 30 | RDR2-sensitive |
| GCTCCAGATTGAACGAAGGCAGAA  | 0  | 17 | RDR2-sensitive |
| GCTCCAGCCAGGAGATCGATCGGG  | 0  | 11 | RDR2-sensitive |
| GCTCCATATAGTGATCGTGCGGGC  | 0  | 12 | RDR2-sensitive |
| GCTCCATCACTAACGGGCTGGCAT  | 0  | 9  | RDR2-sensitive |
| GCTCCCATCGTCCAGCGAGAACGG  | 0  | 13 | RDR2-sensitive |
| GCTCCCGGACGACGAGAACGGCGT  | 0  | 24 | RDR2-sensitive |
| GCTCCCGGACTGGACCAGGCAACC  | 0  | 10 | RDR2-sensitive |
| GCTCCCTGACGGCACTCTAGTTGA  | 44 | 10 | RDR2-resistant |
| GCTCCCTGGATTGTAGCTTCGGTA  | 0  | 68 | RDR2-sensitive |
| GCTCCCTGGTCAGACGCGGACGGT  | 1  | 24 | RDR2-sensitive |
| GCTCCGCTATAATTCACCGGACTG  | 2  | 14 | RDR2-sensitive |
| GCTCCGGACCAACAGTACAGCATA  | 0  | 9  | RDR2-sensitive |
| GCTCCGGACGATCTACGATGGCGA  | 0  | 16 | RDR2-sensitive |
| GCTCCGGATGTACGCAGCAGGCCT  | 0  | 12 | RDR2-sensitive |
| GCTCCGGCTTGAACCTCGTCGGCGT | 0  | 14 | RDR2-sensitive |
| GCTCCGGTAGGACGTCGCGTCGGC  | 1  | 13 | RDR2-sensitive |
| GCTCCGGTCTGTGGCGCTGCGGC   | 2  | 14 | RDR2-sensitive |
| GCTCCGTGCGGACTGTCCGGTGAT  | 0  | 9  | RDR2-sensitive |
| GCTCCTACAGCAGGGTCGCGGACC  | 0  | 9  | RDR2-sensitive |
| GCTCCTACCTTGTGTCGATCGGAT  | 0  | 13 | RDR2-sensitive |
| GCTCCTCTCGGCCAACAGAACGGT  | 0  | 9  | RDR2-sensitive |
| GCTCCTGCAACCTGGTCAGTCGGC  | 2  | 17 | RDR2-sensitive |
| GCTCCTGCAACTCGGTCAGTCGGT  | 8  | 42 | RDR2-sensitive |
| GCTCCTGCAACTTGGTCAGTCGGT  | 8  | 48 | RDR2-sensitive |
| GCTCCTGCGATACGGTCGGTCGGC  | 2  | 17 | RDR2-sensitive |
| GCTCCTGCGATTTGGTCGGTCGGC  | 5  | 21 | RDR2-sensitive |
| GCTCCTGCGATTTGGTCGGTCGGT  | 7  | 24 | RDR2-sensitive |
| GCTCCTGGACGCGTAGGTTCCGGCC | 0  | 14 | RDR2-sensitive |
| GCTCCTGGGCTGCAACTAGGCGTG  | 0  | 18 | RDR2-sensitive |
| GCTCCTTGGACTGTCTTGAGGTTA  | 0  | 11 | RDR2-sensitive |
| GCTCCTTGTTGGACCGAGAGAGGA  | 0  | 14 | RDR2-sensitive |
| GCTCCTTGTTGGACGGAGAAAGGA  | 0  | 13 | RDR2-sensitive |
| GCTCCTTGTTGGACGGAGAGAGGA  | 0  | 38 | RDR2-sensitive |
| GCTCGAAAAAGCGGCTCGGCTCGG  | 0  | 9  | RDR2-sensitive |
| GCTCGAACTCACAACCTAGTGCAT  | 0  | 13 | RDR2-sensitive |
| GCTCGACAAGGACTTGGCAGGCCG  | 0  | 12 | RDR2-sensitive |
| GCTCGACAAGTAGTGCATCGGCAA  | 0  | 10 | RDR2-sensitive |
| GCTCGACACGTAGAGGACGAGAAT  | 0  | 9  | RDR2-sensitive |
| GCTCGACACTCGGCTCAGACACGG  | 0  | 10 | RDR2-sensitive |
| GCTCGACGAACGGACGGCTTAGAT  | 0  | 14 | RDR2-sensitive |
| GCTCGACGAACGTACATCGGCAA   | 1  | 70 | RDR2-sensitive |
| GCTCGACGAACGTACATTGGCAA   | 0  | 12 | RDR2-sensitive |
| GCTCGACGAACGTATATCGGCAA   | 0  | 9  | RDR2-sensitive |
| GCTCGACGAGAACTGTCAACGGCG  | 0  | 12 | RDR2-sensitive |
| GCTCGACGAGATGAAGCCGGACAT  | 3  | 39 | RDR2-sensitive |
| GCTCGACGGGCTGGTTGGTCGGCA  | 0  | 10 | RDR2-sensitive |

|                           |    |     |                |
|---------------------------|----|-----|----------------|
| GCTCGACGTTGTGACTTATGGCAT  | 1  | 22  | RDR2-sensitive |
| GCTCGACTCGGACCGGCATAACGT  | 0  | 12  | RDR2-sensitive |
| GCTCGACTCGGCTCGGACCGGCTC  | 0  | 13  | RDR2-sensitive |
| GCTCGACTCGGCTTGGATCGGCTC  | 0  | 31  | RDR2-sensitive |
| GCTCGACTCGGTTTAGAACGGCTC  | 0  | 28  | RDR2-sensitive |
| GCTCGACTCGTGGAACCGGCCGG   | 0  | 19  | RDR2-sensitive |
| GCTCGACTGCGTAGAAGAGGATTC  | 0  | 11  | RDR2-sensitive |
| GCTCGAGAGCCAGGCTGTGCGCGT  | 1  | 12  | RDR2-sensitive |
| GCTCGAGAGTCTTGCTGTGCGCGT  | 0  | 9   | RDR2-sensitive |
| GCTCGAGCCAGAACCAGAACCAGA  | 0  | 10  | RDR2-sensitive |
| GCTCGAGCTCGGAGCAACTCGGCT  | 77 | 0   | RDR2-resistant |
| GCTCGATAACTCGCTCGACTCGGC  | 0  | 18  | RDR2-sensitive |
| GCTCGATCGTGGCGTTGTATGCGG  | 0  | 10  | RDR2-sensitive |
| GCTCGATGTCCGATTGAAGCAA    | 0  | 12  | RDR2-sensitive |
| GCTCGCAAGTTCGGATAGGGACGG  | 0  | 16  | RDR2-sensitive |
| GCTCGCCTGTAGGACGTACGTGCT  | 0  | 19  | RDR2-sensitive |
| GCTCGCGGACGAAGTGCAGGTCEA  | 0  | 20  | RDR2-sensitive |
| GCTCGCGTGGGACTGGGTATGCAG  | 0  | 10  | RDR2-sensitive |
| GCTCGCTCTGGACTCGCAAGCCGG  | 0  | 21  | RDR2-sensitive |
| GCTCGCTTCAAGTTCGTGGATATT  | 45 | 0   | RDR2-resistant |
| GCTCGCTTTTACTGGGACGGGAT   | 0  | 9   | RDR2-sensitive |
| GCTCGGACAAGAACTAGGCACGG   | 0  | 14  | RDR2-sensitive |
| GCTCGGACAGGAACTAGGCACGG   | 2  | 17  | RDR2-sensitive |
| GCTCGGACAGGAAATTAGGCACGG  | 0  | 14  | RDR2-sensitive |
| GCTCGGACCGGACCCAAAAGCGG   | 0  | 10  | RDR2-sensitive |
| GCTCGGACCGGACCGACACGGTAT  | 0  | 9   | RDR2-sensitive |
| GCTCGGAGGTAAGGCATGTGTAG   | 0  | 12  | RDR2-sensitive |
| GCTCGGATGGGACTTGGTCCGGCCG | 0  | 17  | RDR2-sensitive |
| GCTCGGATGTAGTTTGGATGGCT   | 0  | 13  | RDR2-sensitive |
| GCTCGGATGTATAACACACAGCAT  | 0  | 13  | RDR2-sensitive |
| GCTCGGATTAGCTCAGACCGGTTT  | 0  | 9   | RDR2-sensitive |
| GCTCGGCAAACAGTACATCGGCAA  | 10 | 184 | RDR2-sensitive |
| GCTCGGCAAACAGTGCATCGGCAA  | 1  | 15  | RDR2-sensitive |
| GCTCGGCAAACGTACATCGGCAA   | 1  | 40  | RDR2-sensitive |
| GCTCGGCAAAGAAAGTTCGTTCGTA | 0  | 11  | RDR2-sensitive |
| GCTCGGCAAATAGTACATCGGCAA  | 0  | 19  | RDR2-sensitive |
| GCTCGGCACATAGTACATCGGCAA  | 0  | 37  | RDR2-sensitive |
| GCTCGGCACTACAGATCACGGTGT  | 0  | 31  | RDR2-sensitive |
| GCTCGGCATGGTACGAATAAGCGG  | 1  | 17  | RDR2-sensitive |
| GCTCGGCATGTAGTTGATCGGTA   | 4  | 64  | RDR2-sensitive |
| GCTCGGCCGAGACCGCATAGAAC   | 0  | 9   | RDR2-sensitive |
| GCTCGGCCTGTCAAACACGGTTAG  | 0  | 10  | RDR2-sensitive |
| GCTCGGCCAACAGTACATCGGCAA  | 8  | 40  | RDR2-sensitive |
| GCTCGGCCAACTGTACATCGGCAA  | 40 | 513 | RDR2-sensitive |
| GCTCGGCCAACTGTACATCGGCAC  | 2  | 20  | RDR2-sensitive |
| GCTCGGCCAACTGTACATCGGCCA  | 0  | 20  | RDR2-sensitive |
| GCTCGGCCAACTGTATATCGGCAA  | 2  | 14  | RDR2-sensitive |
| GCTCGGCCGGCGGCAGGATAGAAAC | 0  | 13  | RDR2-sensitive |
| GCTCGGCGTCAAGATCTGCGGTGC  | 0  | 10  | RDR2-sensitive |

|                          |    |     |                |
|--------------------------|----|-----|----------------|
| GCTCGGCTCGACTCGAAGGTGGCT | 0  | 12  | RDR2-sensitive |
| GCTCGGCTCGAGCTCGGAGCGGCT | 0  | 9   | RDR2-sensitive |
| GCTCGGCTCGGATCGGATCGGCTC | 0  | 25  | RDR2-sensitive |
| GCTCGGCTCGGATCGGCTCGATAG | 0  | 9   | RDR2-sensitive |
| GCTCGGCTCGGCTCGACTCGGCTC | 3  | 61  | RDR2-sensitive |
| GCTCGGCTCGGCTCGGAGCGGCTC | 0  | 12  | RDR2-sensitive |
| GCTCGGCTCGGCTCGGATCGGCTC | 15 | 155 | RDR2-sensitive |
| GCTCGGCTCGGCTCGGCATTTAC  | 0  | 14  | RDR2-sensitive |
| GCTCGGCTGGACGACTGCATCTGT | 0  | 17  | RDR2-sensitive |
| GCTCGGCTTGACTCGGACCGGCTT | 0  | 16  | RDR2-sensitive |
| GCTCGGGAACCAGGCTGTGGGCGT | 0  | 24  | RDR2-sensitive |
| GCTCGGGTGAACCAGGCTGAAGTT | 0  | 10  | RDR2-sensitive |
| GCTCGGTAAACTGTACATCGGCAA | 0  | 11  | RDR2-sensitive |
| GCTCGGTAAAGGACTGTCAGCGGC | 0  | 10  | RDR2-sensitive |
| GCTCGGTACGGATAATGGATCGGC | 0  | 15  | RDR2-sensitive |
| GCTCGGTAGCCTGGCTGAGACGAG | 0  | 10  | RDR2-sensitive |
| GCTCGGTAGGACCTGGTCAGCCGG | 0  | 14  | RDR2-sensitive |
| GCTCGGTAGGGACTTGGTCGGCT  | 0  | 9   | RDR2-sensitive |
| GCTCGGTGCCTGAACGAGCTCGGC | 2  | 15  | RDR2-sensitive |
| GCTCGTCGAGCCAAGCTGAGACCG | 0  | 10  | RDR2-sensitive |
| GCTCGTCGTCGTACCATGCGTCAT | 0  | 12  | RDR2-sensitive |
| GCTCGTCGTCGTTCCGTACGTCAT | 0  | 11  | RDR2-sensitive |
| GCTCGTCTCGACTTGAATCGGCTT | 0  | 9   | RDR2-sensitive |
| GCTCGTGCATGTGAGACAGGGGAC | 15 | 0   | RDR2-resistant |
| GCTCGTGGACCAGATTGAGGGGCT | 0  | 9   | RDR2-sensitive |
| GCTCGTGGCTCGTGGTAGATCGGA | 1  | 12  | RDR2-sensitive |
| GCTCGTGTGCTGTAGTGAAGGCT  | 0  | 9   | RDR2-sensitive |
| GCTCGTGTTGTCGGTACATGCATT | 0  | 22  | RDR2-sensitive |
| GCTCGTTCGGAGCGTCGAGCCGGT | 0  | 11  | RDR2-sensitive |
| GCTCGTTTCTGTGGAGCCAGGCTG | 2  | 99  | RDR2-sensitive |
| GCTCTAACTTTCGGTCTGTCGTGC | 0  | 20  | RDR2-sensitive |
| GCTCTACCTCGTCGGATTTGGCGT | 0  | 9   | RDR2-sensitive |
| GCTCTAGTTGCGGACTCAGGCGTT | 0  | 12  | RDR2-sensitive |
| GCTCTATCGTCTACTCTAAAGCAG | 1  | 16  | RDR2-sensitive |
| GCTCTATCTCGACGGCAACTTCAC | 0  | 15  | RDR2-sensitive |
| GCTCTCAACTGTAGCGGTGTGGTA | 0  | 12  | RDR2-sensitive |
| GCTCTCCAGGTTGGACTGTGCGGT | 0  | 82  | RDR2-sensitive |
| GCTCTCCGGACTGGACCAGGCAAC | 0  | 36  | RDR2-sensitive |
| GCTCTCCGGATGGTAGCTTCGGCT | 1  | 19  | RDR2-sensitive |
| GCTCTCGGAAGTAGTCAACGCATG | 0  | 22  | RDR2-sensitive |
| GCTCTCGGCACAGGGACTGGCGGG | 1  | 12  | RDR2-sensitive |
| GCTCTCGGCACAGGGACTGGCTGT | 0  | 11  | RDR2-sensitive |
| GCTCTCGGGACTTCGACGGCGGTG | 0  | 10  | RDR2-sensitive |
| GCTCTCTAGTAGAACGGTTCGGTG | 0  | 23  | RDR2-sensitive |
| GCTCTCTAGTCAGGCGCGGACGGT | 1  | 15  | RDR2-sensitive |
| GCTCTCTATGATAGCGCGGACGGT | 0  | 11  | RDR2-sensitive |
| GCTCTCTGATCAGGCGCGGACGGT | 0  | 10  | RDR2-sensitive |
| GCTCTCTGCACAGACGCGGACGGT | 0  | 9   | RDR2-sensitive |
| GCTCTCTGCACAGGCGCGGACGGT | 0  | 42  | RDR2-sensitive |

|                          |    |     |                |
|--------------------------|----|-----|----------------|
| GCTCTCTGCACAGGGGCGGACGGT | 2  | 37  | RDR2-sensitive |
| GCTCTCTGCATAGACGTGGACGGT | 0  | 14  | RDR2-sensitive |
| GCTCTCTGCATAGGCGTGGACGGT | 0  | 9   | RDR2-sensitive |
| GCTCTCTGCGGACACATGGATGGT | 0  | 28  | RDR2-sensitive |
| GCTCTCTGCGGAGCCGATGACGGT | 0  | 11  | RDR2-sensitive |
| GCTCTCTGCGGAGGAGTAGACGGT | 1  | 21  | RDR2-sensitive |
| GCTCTCTGCGGAGGCGTAGACGGT | 1  | 26  | RDR2-sensitive |
| GCTCTCTGCGGCGGCGTAGACGGG | 0  | 12  | RDR2-sensitive |
| GCTCTCTGCGGCGGCGTAGACGGT | 1  | 12  | RDR2-sensitive |
| GCTCTCTGCGGCGGTACGGACGGT | 0  | 9   | RDR2-sensitive |
| GCTCTCTGGTCAAGCGCGGACGGT | 0  | 32  | RDR2-sensitive |
| GCTCTCTGGTCAGACGAGGACGGT | 4  | 26  | RDR2-sensitive |
| GCTCTCTGGTCAGACGCGGACGGT | 2  | 118 | RDR2-sensitive |
| GCTCTCTGGTCAGACGTGGACGGT | 2  | 41  | RDR2-sensitive |
| GCTCTCTGGTCAGGCACGGACGGT | 0  | 18  | RDR2-sensitive |
| GCTCTCTGGTCAGGCGCGGACGGG | 2  | 14  | RDR2-sensitive |
| GCTCTCTGGTCAGGCGCGGACGGT | 20 | 433 | RDR2-sensitive |
| GCTCTCTGGTCAGGCGTAGACGGT | 1  | 31  | RDR2-sensitive |
| GCTCTCTGGTCAGGCGTGGACGGT | 4  | 53  | RDR2-sensitive |
| GCTCTCTGGTCAGGTGCGGACGGT | 0  | 9   | RDR2-sensitive |
| GCTCTCTGGTCGGACGCGGACGGT | 0  | 16  | RDR2-sensitive |
| GCTCTCTGGTTAGGCGTGGACGGT | 0  | 13  | RDR2-sensitive |
| GCTCTCTGTAGAAGCACGGACGGT | 0  | 29  | RDR2-sensitive |
| GCTCTCTGTAGAGACGCGGACGGT | 0  | 29  | RDR2-sensitive |
| GCTCTCTGTAGAGGCGCGGACGGT | 0  | 13  | RDR2-sensitive |
| GCTCTCTGTAGAGGCGTGGACGGT | 1  | 112 | RDR2-sensitive |
| GCTCTCTGTAGCAGCACGGACGGT | 0  | 41  | RDR2-sensitive |
| GCTCTCTGTGATAGCATGGACGGT | 0  | 14  | RDR2-sensitive |
| GCTCTCTGTGGAACCACGGACGGT | 0  | 21  | RDR2-sensitive |
| GCTCTCTGTGGAAGCGAGGACGAC | 0  | 17  | RDR2-sensitive |
| GCTCTCTGTGGAGACGCGGACGGT | 1  | 20  | RDR2-sensitive |
| GCTCTCTGTGGAGGCACGAACGGT | 0  | 39  | RDR2-sensitive |
| GCTCTCTGTGGAGGCACGGACGGT | 0  | 14  | RDR2-sensitive |
| GCTCTCTGTGGAGGCAGAACGGT  | 0  | 11  | RDR2-sensitive |
| GCTCTCTGTGGAGGCGCGGACGGT | 1  | 28  | RDR2-sensitive |
| GCTCTCTGTGGAGGCGCTGACGGT | 0  | 36  | RDR2-sensitive |
| GCTCTCTGTGGAGGCGTGGACGGT | 1  | 13  | RDR2-sensitive |
| GCTCTCTGTGGAGTCGTGGACGGT | 0  | 46  | RDR2-sensitive |
| GCTCTCTGTGGATGCTTAGACGGT | 0  | 11  | RDR2-sensitive |
| GCTCTCTTCGGCTGCACTGACGGT | 0  | 17  | RDR2-sensitive |
| GCTCTCTTCTACAGCGCGGACGGT | 0  | 12  | RDR2-sensitive |
| GCTCTGACAGTAGACGTTGCAGAT | 0  | 9   | RDR2-sensitive |
| GCTCTGACTGAGACGGTGTATTGC | 1  | 18  | RDR2-sensitive |
| GCTCTGCACGGACGGGAAAACGAA | 0  | 24  | RDR2-sensitive |
| GCTCTGCAGATCTCCCGAAGAGGC | 1  | 17  | RDR2-sensitive |
| GCTCTGCCACGTCAGCTAGCTCGG | 0  | 9   | RDR2-sensitive |
| GCTCTGCCTCGCAGGATTGCTCGG | 0  | 18  | RDR2-sensitive |
| GCTCTGCGAACTGTACATCGGTAA | 0  | 9   | RDR2-sensitive |
| GCTCTGCGGACGGTGATTTAGAG  | 0  | 10  | RDR2-sensitive |

|                           |    |     |                |
|---------------------------|----|-----|----------------|
| GCTCTGCTCGGCTCGATGGTACAG  | 0  | 10  | RDR2-sensitive |
| GCTCTGGACATGGCAGACTGCACC  | 2  | 31  | RDR2-sensitive |
| GCTCTGGACATGTCAGGAAGCTGC  | 0  | 20  | RDR2-sensitive |
| GCTCTGGACGACAGCCTGCACGAA  | 0  | 12  | RDR2-sensitive |
| GCTCTGGACTGTGTACATGATGGA  | 0  | 10  | RDR2-sensitive |
| GCTCTGGATAGTTTGATTGCACGC  | 1  | 20  | RDR2-sensitive |
| GCTCTGGATGCGGCAGAACCGTGC  | 0  | 12  | RDR2-sensitive |
| GCTCTGGATGTGGCAGAACCGTGC  | 0  | 22  | RDR2-sensitive |
| GCTCTGGCCTCTGGACGCGGCTGC  | 0  | 11  | RDR2-sensitive |
| GCTCTGTAGCCTCCAAATTCGGTA  | 0  | 23  | RDR2-sensitive |
| GCTCTGTAGGCGCTACGCGACAAG  | 0  | 9   | RDR2-sensitive |
| GCTCTGTGAATAGTTGTTGACGCT  | 44 | 1   | RDR2-resistant |
| GCTCTGTGACGACGGCGGCTCTCA  | 1  | 25  | RDR2-sensitive |
| GCTCTGTGACGACGGCGGCTCTCC  | 0  | 9   | RDR2-sensitive |
| GCTCTGTGGAATGCACGTCAATCC  | 17 | 0   | RDR2-resistant |
| GCTCTGTGGAGGCGTGGACGGTCC  | 0  | 18  | RDR2-sensitive |
| GCTCTTAACCTTGTGGTCGTGGGT  | 0  | 9   | RDR2-sensitive |
| GCTCTTATGAACGGATCGTCCGGT  | 0  | 11  | RDR2-sensitive |
| GCTCTTCATGATAGATCGTTTCGA  | 0  | 9   | RDR2-sensitive |
| GCTCTTCGGCTATAACTTCGGCGT  | 0  | 11  | RDR2-sensitive |
| GCTCTTGAAGCGGACGGACGACGG  | 2  | 43  | RDR2-sensitive |
| GCTCTTGCTGTAGACCGAGGTGGC  | 2  | 15  | RDR2-sensitive |
| GCTCTTTAGACGGCTCTAGCTCAG  | 0  | 12  | RDR2-sensitive |
| GCTCTTTCGGTTGTAGCTTCGGCT  | 1  | 30  | RDR2-sensitive |
| GCTCTTTGAGTTGGATCTGTTGGT  | 0  | 36  | RDR2-sensitive |
| GCTCTTTGCGACAGCGTGGACGGT  | 0  | 11  | RDR2-sensitive |
| GCTCTTTGGTCAGGCGCGGACGGT  | 2  | 23  | RDR2-sensitive |
| GCTGAACACTCGGCACAGAACGAC  | 2  | 19  | RDR2-sensitive |
| GCTGAACACTCGGCACAGAACGGC  | 1  | 47  | RDR2-sensitive |
| GCTGAACACTCGGCACAGGACGAC  | 3  | 19  | RDR2-sensitive |
| GCTGAACACTCGGCACAGGTAGGC  | 5  | 24  | RDR2-sensitive |
| GCTGAACACTCGGTACAGGACGAC  | 1  | 17  | RDR2-sensitive |
| GCTGAACCAGGTTCAGGTCCGACC  | 0  | 36  | RDR2-sensitive |
| GCTGAACCGGATGCACTGTTGGAC  | 0  | 12  | RDR2-sensitive |
| GCTGAACCTTATGGATGACTGGCT  | 0  | 10  | RDR2-sensitive |
| GCTGAACGTATGGATGACTGTGCT  | 0  | 27  | RDR2-sensitive |
| GCTGAACGTATGGATGGCTGTGCT  | 0  | 23  | RDR2-sensitive |
| GCTGAAGTGAAGAAGGCCTGTCAC  | 0  | 9   | RDR2-sensitive |
| GCTGAAGTGAATAAGCTGCTGCAGA | 1  | 17  | RDR2-sensitive |
| GCTGAAGAAGAACGCGGAACAGGA  | 0  | 12  | RDR2-sensitive |
| GCTGAAGACTAGCTCCGCAGATAC  | 0  | 27  | RDR2-sensitive |
| GCTGAAGACTGAATGTAGGGACGT  | 0  | 110 | RDR2-sensitive |
| GCTGAAGACTGGCTGCGCACTGTG  | 0  | 17  | RDR2-sensitive |
| GCTGAAGATTGGCTGCGCACTGTG  | 2  | 16  | RDR2-sensitive |
| GCTGAAGGATGGACGATCACGGTG  | 41 | 0   | RDR2-resistant |
| GCTGAAGGATGGTGCAGGACGT    | 0  | 9   | RDR2-sensitive |
| GCTGAAGGCTGGTAGGCGGGCCGT  | 0  | 9   | RDR2-sensitive |
| GCTGAAGTAGGACGAGTCACACAG  | 0  | 10  | RDR2-sensitive |
| GCTGAATCGTTTTTGGGCCAGGCT  | 0  | 17  | RDR2-sensitive |



|                          |    |     |                |
|--------------------------|----|-----|----------------|
| GCTGAATTTGGTGGGCTGGTGGCT | 0  | 28  | RDR2-sensitive |
| GCTGACAATGCAGTATCTTCGGCC | 18 | 0   | RDR2-resistant |
| GCTGACACACGGAACAACGACGAC | 0  | 16  | RDR2-sensitive |
| GCTGACACATTGGACGGAAGAGCA | 0  | 24  | RDR2-sensitive |
| GCTGACACGCGGAACGACGATGAG | 1  | 42  | RDR2-sensitive |
| GCTGACACGTGGAACGACGACGAC | 0  | 49  | RDR2-sensitive |
| GCTGACATCTAGGACCACGACGGA | 0  | 15  | RDR2-sensitive |
| GCTGACATGACCCAGACTCGGCAC | 0  | 10  | RDR2-sensitive |
| GCTGACATGTATGCTTAGTTGACG | 87 | 2   | RDR2-resistant |
| GCTGACATTGTCCGAGTAGACGAG | 1  | 12  | RDR2-sensitive |
| GCTGACCAGCGGAATCGATGACGC | 1  | 50  | RDR2-sensitive |
| GCTGACCATGAACCAAGCGAGCAA | 0  | 16  | RDR2-sensitive |
| GCTGACCATGAACCGAGCGAGCAA | 0  | 19  | RDR2-sensitive |
| GCTGACCATGAACCGAGCGAGCCA | 0  | 25  | RDR2-sensitive |
| GCTGACCATGAACCGAGCGAGCTA | 0  | 21  | RDR2-sensitive |
| GCTGACCATGGCACTCGGCAAAGA | 1  | 31  | RDR2-sensitive |
| GCTGACCATGGCACTCGGCAAGAA | 0  | 27  | RDR2-sensitive |
| GCTGACCGAGCCGAGGGACTCCTA | 4  | 41  | RDR2-sensitive |
| GCTGACCGGGCCAAGGACACGACA | 0  | 10  | RDR2-sensitive |
| GCTGACCGGGCTACAGGCACGACA | 0  | 13  | RDR2-sensitive |
| GCTGACCTCGGACGGCTCCCTCGA | 1  | 15  | RDR2-sensitive |
| GCTGACCTGAACCGACCTGACGCC | 1  | 13  | RDR2-sensitive |
| GCTGACCTGATAGGCTGATACGGT | 0  | 66  | RDR2-sensitive |
| GCTGACCTTGAACCGAGCGAGCCA | 0  | 14  | RDR2-sensitive |
| GCTGACGAAGTAGACCGGCCTCTG | 0  | 10  | RDR2-sensitive |
| GCTGACGACGTCAACTCTAGCGGC | 0  | 18  | RDR2-sensitive |
| GCTGACGAGTATAGAACGGAGCTT | 0  | 14  | RDR2-sensitive |
| GCTGACGCACGGAATGACGACGAG | 0  | 30  | RDR2-sensitive |
| GCTGACGCACGGATTGACGACGAC | 1  | 19  | RDR2-sensitive |
| GCTGACGCAGATAGGACAACAGTG | 0  | 19  | RDR2-sensitive |
| GCTGACGCGCAGAACGACGACGAC | 0  | 23  | RDR2-sensitive |
| GCTGACGCGCGGAACAACGACGAC | 0  | 11  | RDR2-sensitive |
| GCTGACGCGCGGAACGACGACAAG | 1  | 20  | RDR2-sensitive |
| GCTGACGCGCGGAACGACGACGAC | 1  | 21  | RDR2-sensitive |
| GCTGACGCGCGGAACGACGACGAG | 5  | 278 | RDR2-sensitive |
| GCTGACGCGCGGAACGACGACGCG | 0  | 9   | RDR2-sensitive |
| GCTGACGCGCGGAACGACGGCGAC | 0  | 14  | RDR2-sensitive |
| GCTGACGCGCGGAATGACGACGAG | 0  | 30  | RDR2-sensitive |
| GCTGACGCGCGGAATGATGACGAC | 0  | 20  | RDR2-sensitive |
| GCTGACGCGGATAGGACAACGGTG | 0  | 48  | RDR2-sensitive |
| GCTGACGCGTCGGCTACCGTGGCA | 0  | 9   | RDR2-sensitive |
| GCTGACGCTGCTGACGCCTGACGG | 0  | 12  | RDR2-sensitive |
| GCTGACGGACGACACGGCTAGGCT | 3  | 21  | RDR2-sensitive |
| GCTGACGGAGACCGCGACCTCTAC | 35 | 0   | RDR2-resistant |
| GCTGACGGGAGATAAGGGAACGGA | 0  | 18  | RDR2-sensitive |
| GCTGACGGTGTAGATTCACGGAAG | 0  | 10  | RDR2-sensitive |
| GCTGACGTCCGACGGTCACTCGA  | 0  | 17  | RDR2-sensitive |
| GCTGACGTGACTGCATAGTAACAT | 0  | 105 | RDR2-sensitive |
| GCTGACGTGGACGCATGTGGGAGC | 0  | 12  | RDR2-sensitive |

|                           |    |     |                |
|---------------------------|----|-----|----------------|
| GCTGACGTGGATAGGACAACGGCA  | 0  | 21  | RDR2-sensitive |
| GCTGACGTGGCTGCATAGTAACAT  | 7  | 342 | RDR2-sensitive |
| GCTGACGTGGCTGCATAGTAAGAT  | 2  | 61  | RDR2-sensitive |
| GCTGACGTGGCTGCATAGTGACAT  | 0  | 10  | RDR2-sensitive |
| GCTGACGTTGTCGCAGTAGACGAG  | 44 | 175 | RDR2-sensitive |
| GCTGACTCAGGCTACGGGGAACAA  | 7  | 28  | RDR2-sensitive |
| GCTGACTCGATGACCTGACGGCAA  | 0  | 13  | RDR2-sensitive |
| GCTGACTCGGACGGGTAAGCACGG  | 0  | 14  | RDR2-sensitive |
| GCTGACTCTGCACTGCACGTGACG  | 0  | 9   | RDR2-sensitive |
| GCTGACTGAGTTGTGGCTACCTGT  | 0  | 9   | RDR2-sensitive |
| GCTGACTGTACGGCTGTACCGTTC  | 0  | 12  | RDR2-sensitive |
| GCTGACTGTCGTATGGTGCACCGG  | 2  | 23  | RDR2-sensitive |
| GCTGACTGTGAGATACACCAGGCT  | 0  | 14  | RDR2-sensitive |
| GCTGACTGTGGGGAGAAGCTGGTG  | 0  | 13  | RDR2-sensitive |
| GCTGACTGTTCTGTCCGAGCACGG  | 1  | 19  | RDR2-sensitive |
| GCTGACTTCGGACGGCTCCCTCGA  | 0  | 18  | RDR2-sensitive |
| GCTGACTTCGTAGCAACGCACGGA  | 1  | 76  | RDR2-sensitive |
| GCTGAGAACCCGAACGTCACCGGC  | 3  | 18  | RDR2-sensitive |
| GCTGAGACAGAAGAGCAACCTCAA  | 0  | 15  | RDR2-sensitive |
| GCTGAGACTGTCGAGGTGGTGCTA  | 0  | 15  | RDR2-sensitive |
| GCTGAGAGGCGGCATGCAGGACAG  | 2  | 22  | RDR2-sensitive |
| GCTGAGATCGCAGAACGGCAGAAC  | 0  | 48  | RDR2-sensitive |
| GCTGAGATCGCAGAATGGCAGAAC  | 0  | 25  | RDR2-sensitive |
| GCTGAGCCGAGTAGAGCCGAGCTG  | 0  | 18  | RDR2-sensitive |
| GCTGAGCCTAGCTGTAGACCAGAC  | 0  | 13  | RDR2-sensitive |
| GCTGAGCGTGA CTGCATGAGGAGG | 0  | 13  | RDR2-sensitive |
| GCTGAGCGTTTGGCAGTCTGCAGC  | 4  | 22  | RDR2-sensitive |
| GCTGAGGACTGTGCGGACGGTGGT  | 0  | 19  | RDR2-sensitive |
| GCTGAGGATGTGAGGACGGAAGAA  | 0  | 32  | RDR2-sensitive |
| GCTGAGGCGCGGAACGACGACGAG  | 1  | 16  | RDR2-sensitive |
| GCTGAGGCGGCTTGTAGGACGGAG  | 1  | 13  | RDR2-sensitive |
| GCTGAGGCTTGGCAACGATGGCGC  | 3  | 19  | RDR2-sensitive |
| GCTGAGTCGCGACAGCACGACGGA  | 19 | 1   | RDR2-resistant |
| GCTGAGTCTGTATACACGAGTGAA  | 0  | 27  | RDR2-sensitive |
| GCTGAGTGCCCGTTGGACTAACGC  | 0  | 10  | RDR2-sensitive |
| GCTGATAGACCTGGCTACTAGAGA  | 0  | 13  | RDR2-sensitive |
| GCTGATCACGAGTCGAGCGAGCTC  | 0  | 11  | RDR2-sensitive |
| GCTGATCCCAGGTAGATAAGACAA  | 0  | 22  | RDR2-sensitive |
| GCTGATCCGGATCTGCTTGGAGGC  | 2  | 28  | RDR2-sensitive |
| GCTGATCCGGTTGGCTGTGACGGA  | 1  | 15  | RDR2-sensitive |
| GCTGATCGATGAAGACGTGCGCTG  | 0  | 10  | RDR2-sensitive |
| GCTGATCGGGCTACAGGCACGGCA  | 0  | 14  | RDR2-sensitive |
| GCTGATCGGGTAAGAGTTACGCAT  | 0  | 9   | RDR2-sensitive |
| GCTGATCGTAGCTCGATGGTTCGT  | 0  | 16  | RDR2-sensitive |
| GCTGATGATGGCACTGTTACAAC   | 91 | 1   | RDR2-resistant |
| GCTGATGCACGGAACGACGACGAC  | 0  | 10  | RDR2-sensitive |
| GCTGATGCACTGTGTGACGAGCCC  | 1  | 13  | RDR2-sensitive |
| GCTGATGCGCAGAACGACGACGAG  | 0  | 36  | RDR2-sensitive |
| GCTGATGGACAGTTGGTCGGCGGC  | 0  | 10  | RDR2-sensitive |

|                           |     |    |                |
|---------------------------|-----|----|----------------|
| GCTGATGGAGGATAGACTGGTGCT  | 53  | 3  | RDR2-resistant |
| GCTGATGGAGTTGGACGATGTCAT  | 0   | 9  | RDR2-sensitive |
| GCTGATGGGGTTACCAGCTGAGA   | 0   | 13 | RDR2-sensitive |
| GCTGATTTAATCGGGCCAAGGCAC  | 2   | 79 | RDR2-sensitive |
| GCTGATTTCTCTGTCTGATGGGCAC | 0   | 13 | RDR2-sensitive |
| GCTGCAACAGTGTCCGGCTTGTAGC | 0   | 23 | RDR2-sensitive |
| GCTGCAAGAACTCGACAGACGCAG  | 0   | 15 | RDR2-sensitive |
| GCTGCAAGTCGCGGATTGTCCGGC  | 0   | 13 | RDR2-sensitive |
| GCTGCAGACCGAGCTTGGACAGAA  | 0   | 13 | RDR2-sensitive |
| GCTGCAGACTGTGACTAGAGCAG   | 0   | 21 | RDR2-sensitive |
| GCTGCAGCGGCGTACTCTATACCA  | 0   | 14 | RDR2-sensitive |
| GCTGCAGCGGGAGACTGGTGAGCA  | 2   | 43 | RDR2-sensitive |
| GCTGCAGCTGAGACAGAAGAGCAA  | 0   | 10 | RDR2-sensitive |
| GCTGCATCCGGATGGCACAGGCAA  | 0   | 9  | RDR2-sensitive |
| GCTGCATCTTGGACGTACACGGCG  | 0   | 10 | RDR2-sensitive |
| GCTGCATGAGTCAGGTCGGCGGGA  | 0   | 13 | RDR2-sensitive |
| GCTGCCACTCTGACCTGATGGACG  | 0   | 9  | RDR2-sensitive |
| GCTGCCGGAACCGAGGGAGACGTC  | 0   | 13 | RDR2-sensitive |
| GCTGCCGGAGCCGAGGGAGACGTC  | 0   | 10 | RDR2-sensitive |
| GCTGCGAAGAAGACGACCCTCTGC  | 0   | 15 | RDR2-sensitive |
| GCTGCGACCAGCGCGCTGGACGTT  | 0   | 11 | RDR2-sensitive |
| GCTGCGACGAGGACGATTGGCGCC  | 100 | 0  | RDR2-resistant |
| GCTGCGACGTGTAGCCTGCAGGGG  | 0   | 15 | RDR2-sensitive |
| GCTGCGATGCAGAACTGATTGGCG  | 0   | 13 | RDR2-sensitive |
| GCTGCGCTGGGCTGGCGGCTGAAA  | 0   | 9  | RDR2-sensitive |
| GCTGCGGAAATGGGCCAAGACGAT  | 0   | 52 | RDR2-sensitive |
| GCTGCGGGCTAGGCTCAGGCAGAA  | 0   | 43 | RDR2-sensitive |
| GCTGCGGGCTGAGATTAGACAGAA  | 0   | 14 | RDR2-sensitive |
| GCTGCGTGATTTTATTGGACGGTA  | 0   | 11 | RDR2-sensitive |
| GCTGCGTTGGCACAAACGGACGTC  | 0   | 35 | RDR2-sensitive |
| GCTGCTACACGACAAGAGAACCGG  | 0   | 14 | RDR2-sensitive |
| GCTGCTAGAGACTCATGACGGC    | 0   | 26 | RDR2-sensitive |
| GCTGCTCCAGTGCACAGGCTGCAG  | 0   | 17 | RDR2-sensitive |
| GCTGCTCCGGCTGAAGATCGTCTGT | 1   | 16 | RDR2-sensitive |
| GCTGCTCGCGTCGGCGATTCTCGT  | 0   | 15 | RDR2-sensitive |
| GCTGCTCGGACTCTGACCACGGAG  | 0   | 34 | RDR2-sensitive |
| GCTGCTCGGATTGTGGCAGGTGT   | 2   | 19 | RDR2-sensitive |
| GCTGCTGACATTAGGACGATGCAT  | 0   | 10 | RDR2-sensitive |
| GCTGCTGCTGTAGGAGACGTGGTG  | 0   | 10 | RDR2-sensitive |
| GCTGCTGGAAGAAGTAGAGGACGA  | 0   | 14 | RDR2-sensitive |
| GCTGCTGGAGAACGTAGAAGACCA  | 0   | 20 | RDR2-sensitive |
| GCTGCTGGAGAGCATAGAAGACCA  | 0   | 30 | RDR2-sensitive |
| GCTGCTGGAGAGCGTAGAGGACCA  | 1   | 40 | RDR2-sensitive |
| GCTGCTGGAGGGAATAGAGGACGT  | 3   | 28 | RDR2-sensitive |
| GCTGCTGGAGGGAGTAGACGACGA  | 0   | 18 | RDR2-sensitive |
| GCTGCTGGAGGGCGTAGAGGACCA  | 0   | 20 | RDR2-sensitive |
| GCTGCTGGAGGGGTAGAGGACGTC  | 0   | 14 | RDR2-sensitive |
| GCTGCTGGAGTGAGTAGAGGACGA  | 0   | 13 | RDR2-sensitive |
| GCTGCTGGATTCTCAAGACGTGGT  | 15  | 0  | RDR2-resistant |

|                           |    |    |                |
|---------------------------|----|----|----------------|
| GCTGCTGGCAGAATTTACGGGCAA  | 0  | 19 | RDR2-sensitive |
| GCTGCTGGCCTGTGGATAGCACGC  | 0  | 18 | RDR2-sensitive |
| GCTGCTGGGACTTCTGCCTGACGG  | 10 | 56 | RDR2-sensitive |
| GCTGCTGGGCTGCGGCTGAAGACC  | 0  | 23 | RDR2-sensitive |
| GCTGCTGTAGAAGGCGGGCGCTGA  | 0  | 22 | RDR2-sensitive |
| GCTGCTGTAGTCTGTAGACGGGAG  | 0  | 10 | RDR2-sensitive |
| GCTGCTGTCTGGATAGAGGACGCA  | 0  | 13 | RDR2-sensitive |
| GCTGCTGTGCCGCTCTGAAGCCGG  | 0  | 9  | RDR2-sensitive |
| GCTGCTGTGGACCCGGAGTAGGCG  | 1  | 36 | RDR2-sensitive |
| GCTGCTGTGGGCTTCAAGGTGGTG  | 0  | 11 | RDR2-sensitive |
| GCTGCTGTTAGATATGAGATGGAT  | 0  | 19 | RDR2-sensitive |
| GCTGCTTAGAGACGAGGACGCGAG  | 0  | 25 | RDR2-sensitive |
| GCTGCTTCGGACTGGGGCACCCGGA | 1  | 23 | RDR2-sensitive |
| GCTGCTTCGGGCTGGGGCACCCGGA | 1  | 13 | RDR2-sensitive |
| GCTGCTTGGGCTCCTCCGTCGGAT  | 0  | 10 | RDR2-sensitive |
| GCTGCTTTAAGGGATCTGTTGGAG  | 0  | 9  | RDR2-sensitive |
| GCTGCTTTGTGCGGATCTGTTGGG  | 0  | 20 | RDR2-sensitive |
| GCTGGAACACTGGGACGAGCGCGG  | 0  | 11 | RDR2-sensitive |
| GCTGGAACCTGGAAGCGGAGCTCG  | 0  | 12 | RDR2-sensitive |
| GCTGGAACTCAATTGGCATTACCC  | 0  | 16 | RDR2-sensitive |
| GCTGGAAGAAGTAGAGGACGACCT  | 0  | 24 | RDR2-sensitive |
| GCTGGAAGGAGTAGAGGACGTCAT  | 0  | 15 | RDR2-sensitive |
| GCTGGAATTATTTGCATCTGTGGA  | 17 | 0  | RDR2-resistant |
| GCTGGACAAACAGATCACGCGAGC  | 0  | 9  | RDR2-sensitive |
| GCTGGACAACCTGGACGCAGCGGC  | 1  | 22 | RDR2-sensitive |
| GCTGGACAACCTGGACGCAGTGGC  | 0  | 26 | RDR2-sensitive |
| GCTGGACACAAAAGGAGGCTGTA   | 0  | 11 | RDR2-sensitive |
| GCTGGACACCTGTAGGGGCACGTA  | 0  | 16 | RDR2-sensitive |
| GCTGGACACTCGGCACAGGACCAC  | 0  | 12 | RDR2-sensitive |
| GCTGGACACTCGGCACAGGACCCC  | 0  | 31 | RDR2-sensitive |
| GCTGGACACTCGGCACAGGACGAC  | 6  | 46 | RDR2-sensitive |
| GCTGGACACTGCAGGGGAACTGAG  | 0  | 9  | RDR2-sensitive |
| GCTGGACAGCGGCTGGGAGGAGGG  | 25 | 2  | RDR2-resistant |
| GCTGGACATAGAAATCACGCGCAC  | 0  | 37 | RDR2-sensitive |
| GCTGGACATTAGAAGAAGACTTGT  | 0  | 10 | RDR2-sensitive |
| GCTGGACCAATGGAGACAAGACAA  | 0  | 14 | RDR2-sensitive |
| GCTGGACCACAGAATTCGGCCCGT  | 0  | 10 | RDR2-sensitive |
| GCTGGACCAGTACGGGAGCCTCGA  | 0  | 19 | RDR2-sensitive |
| GCTGGACCCGGCACGACTTTGGCG  | 0  | 12 | RDR2-sensitive |
| GCTGGACCCTTTACACGACTGGAT  | 0  | 13 | RDR2-sensitive |
| GCTGGACCGCTGGAGCAGAGACGT  | 0  | 14 | RDR2-sensitive |
| GCTGGACCGGGCCGAATGCATGAC  | 0  | 21 | RDR2-sensitive |
| GCTGGACCTATAGAGGAGATAGTT  | 0  | 13 | RDR2-sensitive |
| GCTGGACCTCAGCAGACTCGTGTC  | 0  | 14 | RDR2-sensitive |
| GCTGGACCTGCAGGTGGAGTCTAT  | 1  | 19 | RDR2-sensitive |
| GCTGGACCTGGACGGAACGGCTGG  | 0  | 28 | RDR2-sensitive |
| GCTGGACCTTTGCGCAGACTGCTT  | 0  | 14 | RDR2-sensitive |
| GCTGGACGACGGCTTAACAACCTTG | 0  | 9  | RDR2-sensitive |
| GCTGGACGATGCATGGCGCTGCTG  | 0  | 17 | RDR2-sensitive |

|                          |    |     |                |
|--------------------------|----|-----|----------------|
| GCTGGACGCAGGAAGCAGAACGGC | 0  | 79  | RDR2-sensitive |
| GCTGGACGCAGGAAGTAGAACGGC | 0  | 21  | RDR2-sensitive |
| GCTGGACGCAGGGGAGATGGACCC | 1  | 33  | RDR2-sensitive |
| GCTGGACGGCGTTGTTGACTGCGA | 0  | 9   | RDR2-sensitive |
| GCTGGACGTAGGGCCTACAAGGCA | 0  | 12  | RDR2-sensitive |
| GCTGGACGTTGCTGGGGGCCGCT  | 0  | 10  | RDR2-sensitive |
| GCTGGACTAACAGGCAACAATCGA | 0  | 11  | RDR2-sensitive |
| GCTGGACTAGCTCTCGCAAAGAC  | 0  | 15  | RDR2-sensitive |
| GCTGGACTCGAGGGAGACGGAGCT | 0  | 10  | RDR2-sensitive |
| GCTGGACTCGGTGCAGAACGGTTG | 0  | 15  | RDR2-sensitive |
| GCTGGACTCGTCACCAGGAGACTG | 0  | 45  | RDR2-sensitive |
| GCTGGACTCTCGCGATACGTGAAT | 0  | 9   | RDR2-sensitive |
| GCTGGACTGAGATACGGATTGCAT | 0  | 10  | RDR2-sensitive |
| GCTGGACTGATGAATAGTGCGCGG | 0  | 21  | RDR2-sensitive |
| GCTGGACTGATGAATAGTGCGCTA | 0  | 18  | RDR2-sensitive |
| GCTGGACTGATGAATAGTGTGCTA | 0  | 167 | RDR2-sensitive |
| GCTGGACTGATGAATAGTGTGCTC | 0  | 35  | RDR2-sensitive |
| GCTGGACTGATGAATAGTGTGCTT | 0  | 16  | RDR2-sensitive |
| GCTGGACTGCTGGAAATGACGCGG | 0  | 10  | RDR2-sensitive |
| GCTGGACTGGACGCATATACCTAG | 0  | 12  | RDR2-sensitive |
| GCTGGACTGGCCCGGTGGCACTAT | 0  | 17  | RDR2-sensitive |
| GCTGGACTGGTGAATAGTGTGCTA | 0  | 9   | RDR2-sensitive |
| GCTGGACTGTGTGCGGCTTTCTAT | 0  | 16  | RDR2-sensitive |
| GCTGGACTTCTATTGGTTTGACGT | 2  | 22  | RDR2-sensitive |
| GCTGGAGAAGGACACGACGAAGAC | 1  | 16  | RDR2-sensitive |
| GCTGGAGAAGGCTAGACTCGCCAT | 68 | 6   | RDR2-resistant |
| GCTGGAGACATAAAGGAGGACTGC | 0  | 18  | RDR2-sensitive |
| GCTGGAGACGAAGCTCGGAGTCAT | 1  | 13  | RDR2-sensitive |
| GCTGGAGACTGGCGCTGCGCACCC | 1  | 29  | RDR2-sensitive |
| GCTGGAGAGAGTAGAGGACGTCCT | 0  | 37  | RDR2-sensitive |
| GCTGGAGAGCGTAGAAGACCGTTT | 0  | 19  | RDR2-sensitive |
| GCTGGAGAGCGTAGAAGACTGTTT | 0  | 13  | RDR2-sensitive |
| GCTGGAGAGTGTAGAAGACCGTTT | 0  | 92  | RDR2-sensitive |
| GCTGGAGCACTGTAGCGGGCCGGT | 0  | 14  | RDR2-sensitive |
| GCTGGAGCAGAGTAGGACGAGGCT | 0  | 29  | RDR2-sensitive |
| GCTGGAGCGAGTAGAGGACGTCCT | 0  | 10  | RDR2-sensitive |
| GCTGGAGCGTGCTACTCAAGACAA | 0  | 18  | RDR2-sensitive |
| GCTGGAGCTGGAGCTGGAGCCGGA | 0  | 9   | RDR2-sensitive |
| GCTGGAGGAAGTAGAGGACGACAC | 0  | 15  | RDR2-sensitive |
| GCTGGAGGAGACCCTGACGGAGAC | 0  | 10  | RDR2-sensitive |
| GCTGGAGGGAGTAGACGACGAGAG | 0  | 19  | RDR2-sensitive |
| GCTGGAGGGAGTAGAGGACGTCCT | 2  | 104 | RDR2-sensitive |
| GCTGGAGGGAGTAGAGGACGTTCT | 0  | 24  | RDR2-sensitive |
| GCTGGAGGGAGTAGAGGGCGTCCT | 0  | 15  | RDR2-sensitive |
| GCTGGAGGGAGTAGATGACGTCAT | 2  | 27  | RDR2-sensitive |
| GCTGGAGGGAGTAGATGACGTCCT | 1  | 69  | RDR2-sensitive |
| GCTGGAGGGAGTAGATGATGTCCT | 0  | 11  | RDR2-sensitive |
| GCTGGAGGGCTAGAGGACGTCGAG | 0  | 9   | RDR2-sensitive |
| GCTGGAGGGCTTGCCTACACTCAA | 0  | 9   | RDR2-sensitive |

|                             |    |     |                |
|-----------------------------|----|-----|----------------|
| GCTGGAGTGAGTAGAGGACGATCT    | 0  | 17  | RDR2-sensitive |
| GCTGGAGTGAGTAGATGACGTCCT    | 0  | 35  | RDR2-sensitive |
| GCTGGAGTTCGGACCTACCCGGAG    | 0  | 10  | RDR2-sensitive |
| GCTGGATACTGTTGGACACGGT      | 0  | 10  | RDR2-sensitive |
| GCTGGATAGATGCAGGAGCTCACA    | 0  | 35  | RDR2-sensitive |
| GCTGGATCAGATCTGCATCAACTC    | 1  | 13  | RDR2-sensitive |
| GCTGGATCTTGAGTGGAGCGACGG    | 0  | 22  | RDR2-sensitive |
| GCTGGATGCAGTAGAGGACGTCAT    | 2  | 15  | RDR2-sensitive |
| GCTGGATGGTGACTGTGCGGCCAA    | 1  | 26  | RDR2-sensitive |
| GCTGGATTGCGGGTGTGCAGGCGT    | 0  | 12  | RDR2-sensitive |
| GCTGGCAACGGTGATTTGCGGGAC    | 0  | 54  | RDR2-sensitive |
| GCTGGCAAGGAACACGGGCGCGCC    | 40 | 4   | RDR2-resistant |
| GCTGGCAAGTTGCGATAGGGACGG    | 0  | 33  | RDR2-sensitive |
| GCTGGCAAGTTTGGATAGGGACGG    | 0  | 10  | RDR2-sensitive |
| GCTGGCAATTGTGAAACGCAGAA     | 2  | 21  | RDR2-sensitive |
| GCTGGCACAACGGACGTCGTGGC     | 1  | 32  | RDR2-sensitive |
| GCTGGCACACTGGACGGAAGAGCA    | 0  | 9   | RDR2-sensitive |
| GCTGGCACGGACTAGACGACAGGC    | 0  | 27  | RDR2-sensitive |
| GCTGGCACTGCAGACTGAGAAGGC    | 0  | 33  | RDR2-sensitive |
| GCTGGCCATGGTGAGGATGACGAG    | 0  | 10  | RDR2-sensitive |
| GCTGGCCTAGGACCGCATAGAACC    | 0  | 11  | RDR2-sensitive |
| GCTGGCCTCTAGCACTGACGACAC    | 0  | 10  | RDR2-sensitive |
| GCTGGCCTGTGGATAGCACGCGCG    | 1  | 29  | RDR2-sensitive |
| GCTGGCGAAAGAGGCTCGGCTCGG    | 0  | 14  | RDR2-sensitive |
| GCTGGCGAGTGAGGGCTGACACGG    | 0  | 9   | RDR2-sensitive |
| GCTGGCGTCCTTAGATCCGTCGGA    | 0  | 11  | RDR2-sensitive |
| GCTGGCGTGTATAGGACGGTCTGA    | 0  | 20  | RDR2-sensitive |
| GCTGGCTCTCGGCAAGACTGACG     | 2  | 99  | RDR2-sensitive |
| GCTGGCTGATAGACCACGACGGAC    | 0  | 9   | RDR2-sensitive |
| GCTGGCTGCGAGCATACAGTTCAC    | 0  | 9   | RDR2-sensitive |
| GCTGGCTGCGTGAACAAGATACGG    | 0  | 21  | RDR2-sensitive |
| GCTGGGAAGCTTTGGGATCTCGGG    | 55 | 5   | RDR2-resistant |
| GCTGGGACAAGGCATGACACAGAT    | 0  | 25  | RDR2-sensitive |
| GCTGGGACAGGCAGGACAGGACGT    | 0  | 26  | RDR2-sensitive |
| GCTGGGACTTCTGCCTGACGGCCG    | 4  | 48  | RDR2-sensitive |
| GCTGGGACTTGACGAGCTAGGCAG    | 0  | 10  | RDR2-sensitive |
| GCTGGGAGCTCTCTGTTGATGGC     | 2  | 21  | RDR2-sensitive |
| GCTGGGCAAGCAATACGATGACAA    | 0  | 11  | RDR2-sensitive |
| GCTGGGCAGGAAGTACTGAGCAGGCAT | 0  | 21  | RDR2-sensitive |
| GCTGGGCAGTGGGAGGCACGACCT    | 0  | 13  | RDR2-sensitive |
| GCTGGGCAGTTACAGAATGGACGA    | 0  | 11  | RDR2-sensitive |
| GCTGGGCCGTGCTCTGATTGACGG    | 0  | 19  | RDR2-sensitive |
| GCTGGGCCGTGCTCTGGTTGGCGG    | 0  | 16  | RDR2-sensitive |
| GCTGGGCCGTGCTTATGATTTGCGG   | 0  | 12  | RDR2-sensitive |
| GCTGGGCGTGTAGAGGACGTGTCT    | 0  | 106 | RDR2-sensitive |
| GCTGGGCTATCTGGATAAGTAGAA    | 0  | 11  | RDR2-sensitive |
| GCTGGGCTGCGGCTGAAGACCTGC    | 1  | 56  | RDR2-sensitive |
| GCTGGGGCGCTGGGCTGTAGTGGC    | 0  | 11  | RDR2-sensitive |
| GCTGGGGTTCGGGAGCAGACGTGAG   | 0  | 14  | RDR2-sensitive |

|                           |    |    |                |
|---------------------------|----|----|----------------|
| GCTGGGTAGACGCAGTAGCTGCAT  | 0  | 12 | RDR2-sensitive |
| GCTGGGTCGACGATGTCAGAAGAT  | 0  | 11 | RDR2-sensitive |
| GCTGGGTCGGGCTAGAATGGGCTT  | 0  | 23 | RDR2-sensitive |
| GCTGGGTCGTTACAGAGTGGGCGT  | 0  | 15 | RDR2-sensitive |
| GCTGGGTTGTCTGTTTCGATGGCGC | 2  | 16 | RDR2-sensitive |
| GCTGGGTTTGCCTGATCGCCGGC   | 2  | 46 | RDR2-sensitive |
| GCTGGTAATCCGGATGATAGGCGT  | 0  | 9  | RDR2-sensitive |
| GCTGGTACTGTATCGGCTATCCAC  | 0  | 20 | RDR2-sensitive |
| GCTGGTACTGTGGTGGGCAGCTAT  | 1  | 18 | RDR2-sensitive |
| GCTGGTCAGTCGGAGGAGATAGGT  | 0  | 12 | RDR2-sensitive |
| GCTGGTCAGTGGAGCGGCGAAGTG  | 0  | 15 | RDR2-sensitive |
| GCTGGTCATGTGGGTTTTGGCGGT  | 80 | 0  | RDR2-resistant |
| GCTGGTCATGTGGTCTTTGACGGA  | 0  | 9  | RDR2-sensitive |
| GCTGGTCGAGCGGACGAAGCGAGC  | 0  | 10 | RDR2-sensitive |
| GCTGGTCGGCAGACACTCGGCAA   | 1  | 14 | RDR2-sensitive |
| GCTGGTCGTGCTGGTCGGAGGGGC  | 1  | 17 | RDR2-sensitive |
| GCTGGTCTCGAGTGGATAAGGCAT  | 0  | 10 | RDR2-sensitive |
| GCTGGTCTGACAGAGACAAAACGG  | 1  | 13 | RDR2-sensitive |
| GCTGGTCTGGCTCGAGCACGGCTA  | 0  | 14 | RDR2-sensitive |
| GCTGGTGACGTCGTAGATGAGCAT  | 0  | 10 | RDR2-sensitive |
| GCTGGTGCTGCAGTCAGGACATCC  | 0  | 11 | RDR2-sensitive |
| GCTGGTGGACGAAGAGCGCGGATA  | 0  | 12 | RDR2-sensitive |
| GCTGGTGTTGGACGAATACGGGGA  | 0  | 10 | RDR2-sensitive |
| GCTGGTGTTGTAGGTGTAGTCGTG  | 0  | 13 | RDR2-sensitive |
| GCTGGTTGAAACGGAGCGGCTCC   | 0  | 12 | RDR2-sensitive |
| GCTGGTTGGTGGCCTCGTTGGACG  | 0  | 9  | RDR2-sensitive |
| GCTGGTTTGGTCGTTTGGAGGCTA  | 0  | 11 | RDR2-sensitive |
| GCTGTAACGTTGGCTCTTGACGGA  | 0  | 11 | RDR2-sensitive |
| GCTGTAAGGAGGCAGAACCGTGCA  | 0  | 42 | RDR2-sensitive |
| GCTGTACGACATGGTAGACGGGCT  | 0  | 18 | RDR2-sensitive |
| GCTGTACGACTGGAGGCAGAACGG  | 0  | 24 | RDR2-sensitive |
| GCTGTACGGAGGCAGAACCGGGCT  | 0  | 24 | RDR2-sensitive |
| GCTGTACGGCGTGGTAGACAGGCT  | 0  | 13 | RDR2-sensitive |
| GCTGTACGGCGTGGTAGACGGGCT  | 2  | 63 | RDR2-sensitive |
| GCTGTAGCGAGTAGAGGACGTCCT  | 0  | 10 | RDR2-sensitive |
| GCTGTAGCGGATCGGGATCGGAC   | 0  | 10 | RDR2-sensitive |
| GCTGTAGGACTAATCAGTAGATGT  | 15 | 0  | RDR2-resistant |
| GCTGTATCGCTGGAGAAACGACGG  | 0  | 30 | RDR2-sensitive |
| GCTGTACAGCTGGAGAAGACAAGGA | 0  | 21 | RDR2-sensitive |
| GCTGTACAGGCAGACACTCGGCAA  | 3  | 16 | RDR2-sensitive |
| GCTGTCCCTGGCTGAGAAGATGAC  | 0  | 9  | RDR2-sensitive |
| GCTGTCCGAACAGAACGATGCGCC  | 1  | 13 | RDR2-sensitive |
| GCTGTCTTCTGTGACACCGGTCA   | 4  | 21 | RDR2-sensitive |
| GCTGTGAGACCACCGGATCGGAG   | 0  | 84 | RDR2-sensitive |
| GCTGTGAGCAGGAGCTGATGCGG   | 0  | 16 | RDR2-sensitive |
| GCTGTGAGTGTGGGCTGGGCCGG   | 0  | 32 | RDR2-sensitive |
| GCTGTGATTGTGGGCTAGGCCGG   | 0  | 10 | RDR2-sensitive |
| GCTGTGCGAGAGAGGACGCCGATC  | 0  | 16 | RDR2-sensitive |
| GCTGTGCGTAGGACAGATCGGCT   | 0  | 13 | RDR2-sensitive |

|                           |    |     |                |
|---------------------------|----|-----|----------------|
| GCTGTGCGGTAGGACAGTTCGGCT  | 3  | 111 | RDR2-sensitive |
| GCTGTGCTCGCCCTCTGGATCGG   | 0  | 14  | RDR2-sensitive |
| GCTGTGCGGGCCGGCACGACACGGT | 0  | 9   | RDR2-sensitive |
| GCTGTGCTCCACGAGCTGACGCGG  | 0  | 12  | RDR2-sensitive |
| GCTGTGCTGCGTAGAGAAGAGGAG  | 0  | 25  | RDR2-sensitive |
| GCTGTGCTGCTGGGCTTGGTGGCC  | 3  | 18  | RDR2-sensitive |
| GCTGTGCTGTACGACTCGTCTGGC  | 0  | 26  | RDR2-sensitive |
| GCTGTCTCGGGCGGATTCGGCAT   | 7  | 28  | RDR2-sensitive |
| GCTGTCTCTAAGGCGTGA CTGGG  | 0  | 12  | RDR2-sensitive |
| GCTGTCTCTGCAACTCGGCCCTAG  | 0  | 12  | RDR2-sensitive |
| GCTGTCTGGATAGAGGACGCACAG  | 0  | 13  | RDR2-sensitive |
| GCTGTCTGGGCACGTCGGGCGGGC  | 0  | 9   | RDR2-sensitive |
| GCTGTCTGTAGAGGTGCGGACGGT  | 0  | 20  | RDR2-sensitive |
| GCTGTCTTGGATGGTGTAGAGGCT  | 0  | 12  | RDR2-sensitive |
| GCTGTGAAAGCTGATCTGGATGAC  | 15 | 0   | RDR2-resistant |
| GCTGTGACGACAAGACTCATCGGC  | 0  | 41  | RDR2-sensitive |
| GCTGTGCTGGATCTGAATGGCTAC  | 0  | 16  | RDR2-sensitive |
| GCTGTGGAAAAAGCTGCTGTAGGC  | 0  | 19  | RDR2-sensitive |
| GCTGTGGACTGCAATCTCCGGCTT  | 19 | 0   | RDR2-resistant |
| GCTGTGGACTGTGAGCGGTGGAAA  | 0  | 9   | RDR2-sensitive |
| GCTGTGGGACGACGGCGCCTGAGC  | 0  | 10  | RDR2-sensitive |
| GCTGTGGGCCAGGCTTAGACAGAG  | 0  | 14  | RDR2-sensitive |
| GCTGTGGGCTGTGGCACCAGAGAC  | 0  | 11  | RDR2-sensitive |
| GCTGTGTACGACAAGCTCCGACGC  | 1  | 16  | RDR2-sensitive |
| GCTGTGTACTGTAGCTGTCAGGCA  | 2  | 16  | RDR2-sensitive |
| GCTGTGTAGAGCATGGGTGGTGAG  | 0  | 11  | RDR2-sensitive |
| GCTGTGTAGTGTGATGGTCTGGGT  | 15 | 0   | RDR2-resistant |
| GCTGTGTATGACAAGCTCCGACGC  | 5  | 20  | RDR2-sensitive |
| GCTGTTCAAGTCGGTGCATGGAAA  | 0  | 9   | RDR2-sensitive |
| GCTGTTCCGGATGATCGCATGCAAT | 41 | 2   | RDR2-resistant |
| GCTGTTCTTCGGGCAAAGGATGGC  | 0  | 9   | RDR2-sensitive |
| GCTGTTGACTCGGGCCGTGCCGGT  | 0  | 13  | RDR2-sensitive |
| GCTGTTGACTGTGCGAGCTTCGGA  | 1  | 18  | RDR2-sensitive |
| GCTGTTGCATCGGGCTGTGCCGGT  | 1  | 21  | RDR2-sensitive |
| GCTGTTGCGACGACGACTTCGGAC  | 0  | 12  | RDR2-sensitive |
| GCTGTTGGAGCAGAAGCAATGCAA  | 0  | 44  | RDR2-sensitive |
| GCTGTTGGAGGAACTCAACCAGGC  | 0  | 13  | RDR2-sensitive |
| GCTGTTGGGCTAGCGGCTGGTGCT  | 0  | 23  | RDR2-sensitive |
| GCTGTTGGGGCGAAGGCAAAGACG  | 0  | 10  | RDR2-sensitive |
| GCTGTTGTATTGTGGAAGGGCGTT  | 0  | 21  | RDR2-sensitive |
| GCTGTTGTGCGCTACTGACGGTAC  | 1  | 23  | RDR2-sensitive |
| GCTGTTGTGTTCTGTATGCGTTGG  | 17 | 0   | RDR2-resistant |
| GCTGTTTCTCCCTGCAGGACCTTC  | 0  | 9   | RDR2-sensitive |
| GCTGTTTGGACTGCTGCAGCTGCA  | 1  | 18  | RDR2-sensitive |
| GCTGTTTCTCTGTCAGGTCGGTCA  | 1  | 17  | RDR2-sensitive |
| GCTTAACACTCGGCACAGGACGCA  | 0  | 12  | RDR2-sensitive |
| GCTTAACCCGGTCTGAAGCTTCAA  | 0  | 13  | RDR2-sensitive |
| GCTTACCTGGACCTTTGGAGCGGC  | 0  | 11  | RDR2-sensitive |
| GCTTACGGTACAGAACTAGGCTAA  | 0  | 21  | RDR2-sensitive |



|                           |    |    |                |
|---------------------------|----|----|----------------|
| GCTTAGACTGTACAACGGCTCCCG  | 0  | 33 | RDR2-sensitive |
| GCTTAGCGAACTGTACATCGGCAA  | 0  | 9  | RDR2-sensitive |
| GCTTAGCGGATTGTTTGGTAGGCT  | 0  | 9  | RDR2-sensitive |
| GCTTAGCTGTGGTGTTTCGTGTGGA | 1  | 13 | RDR2-sensitive |
| GCTTAGGTTCCGGCTTAGAGAGGCT | 0  | 9  | RDR2-sensitive |
| GCTTAGTCGGAGGTGTGTGTGGTC  | 18 | 0  | RDR2-resistant |
| GCTTAGTGCGACTGTGTTCAACGG  | 58 | 3  | RDR2-resistant |
| GCTTATAGGACTGAGTCGGCTCAA  | 0  | 9  | RDR2-sensitive |
| GCTTATTCGTGTAGGGCCCGCCTG  | 0  | 9  | RDR2-sensitive |
| GCTTCAACATAGTGGATCGTTCAT  | 0  | 10 | RDR2-sensitive |
| GCTTCAATATGATCGTTGCAGGAC  | 0  | 14 | RDR2-sensitive |
| GCTTCACCAGGAGAGATGTGGACA  | 0  | 14 | RDR2-sensitive |
| GCTTCACGACGTCGAGCTGGGCAC  | 0  | 11 | RDR2-sensitive |
| GCTTCAGACGACTCGAACGGCGCC  | 0  | 38 | RDR2-sensitive |
| GCTTCAGATTCGGGTCGGATACGG  | 0  | 10 | RDR2-sensitive |
| GCTTCAGCGGACGAAGGGCATTAA  | 0  | 10 | RDR2-sensitive |
| GCTTCCTACTGTAGCATGATGGCG  | 0  | 18 | RDR2-sensitive |
| GCTTCCTGCGGACTGTGGGCGGTC  | 1  | 83 | RDR2-sensitive |
| GCTTCGCTGGACGCAGGGACGCC   | 0  | 9  | RDR2-sensitive |
| GCTTCGCGAGGACCGTGGGCGGGC  | 0  | 15 | RDR2-sensitive |
| GCTTCGCTCGGATGGATAGCGGAT  | 0  | 11 | RDR2-sensitive |
| GCTTCGGACACTCGGCAAAGCAGT  | 0  | 13 | RDR2-sensitive |
| GCTTCGGACCGGCCCATCAGACCC  | 0  | 17 | RDR2-sensitive |
| GCTTCGGACGGTCCATGATGGCGT  | 0  | 14 | RDR2-sensitive |
| GCTTCGGACTGGCACGACACGGCC  | 2  | 17 | RDR2-sensitive |
| GCTTCGGATTCGGGTCGGATACAG  | 0  | 19 | RDR2-sensitive |
| GCTTCGGATTTGAGATAAAGATGT  | 0  | 12 | RDR2-sensitive |
| GCTTCGGCTGAGGGCCCACGGCC   | 0  | 12 | RDR2-sensitive |
| GCTTCGGGCTTCAAAGTGTCCGGC  | 1  | 25 | RDR2-sensitive |
| GCTTCGGTTCAAGCCTCCCGACGG  | 0  | 9  | RDR2-sensitive |
| GCTTCGTCTGGTCACGGTTGTTCT  | 0  | 9  | RDR2-sensitive |
| GCTTCGTGTCGGGCTAACGGGTCA  | 0  | 12 | RDR2-sensitive |
| GCTTCGTTGGATAGCTCGGCGGAC  | 0  | 9  | RDR2-sensitive |
| GCTTCTAGGGCTATAGACGGTCGC  | 0  | 10 | RDR2-sensitive |
| GCTTCTAGGGTTGGATCGCACGGA  | 0  | 13 | RDR2-sensitive |
| GCTTCTAGTCGGGCCGGTCCAGTC  | 0  | 11 | RDR2-sensitive |
| GCTTCTCGGATCTTCGGACGCGGC  | 0  | 14 | RDR2-sensitive |
| GCTTCTCGGCGTTCGGTAGGCGGA  | 0  | 11 | RDR2-sensitive |
| GCTTCTCGGGCACCGTAGGCGGCT  | 0  | 27 | RDR2-sensitive |
| GCTTCTCGGGCACCGTAGGCGGGT  | 0  | 13 | RDR2-sensitive |
| GCTTCTCGGTGACCGTAGGCGGGT  | 0  | 9  | RDR2-sensitive |
| GCTTCTCTGGCTCTGTGACGGTGA  | 0  | 10 | RDR2-sensitive |
| GCTTCTCTGTAGGGTTATCGCGCT  | 0  | 9  | RDR2-sensitive |
| GCTTCTGTTAGATGTTGGATAGAC  | 0  | 14 | RDR2-sensitive |
| GCTTCTGTTAGATGTTGGATGGAC  | 0  | 9  | RDR2-sensitive |
| GCTTCTTCGTGTAGGACCTTCGGC  | 1  | 21 | RDR2-sensitive |
| GCTTCTTTCTGTAAGACCTTCGGC  | 2  | 28 | RDR2-sensitive |
| GCTTGACGAACTGTACATTGGCAA  | 0  | 11 | RDR2-sensitive |
| GCTTGACGAACTGTATATTGGCAA  | 0  | 16 | RDR2-sensitive |

|                           |    |     |                |
|---------------------------|----|-----|----------------|
| GCTTGAGATCTACGGACCCGAGGC  | 0  | 25  | RDR2-sensitive |
| GCTTGAGCCCTGTAGAAGCACAGC  | 1  | 22  | RDR2-sensitive |
| GCTTGATCGGCACCAGACGAAGAC  | 0  | 17  | RDR2-sensitive |
| GCTTGATCGGCTGGTTGGGCAGGC  | 0  | 15  | RDR2-sensitive |
| GCTTGATGGAAGTAGAGTCCGGCC  | 0  | 10  | RDR2-sensitive |
| GCTTGCAAGAGCCAAGAACGTCGT  | 0  | 25  | RDR2-sensitive |
| GCTTGCAGAGACGGACGGGAACGG  | 0  | 9   | RDR2-sensitive |
| GCTTGCAGGTTGTCGGGCCGGCAC  | 1  | 76  | RDR2-sensitive |
| GCTTGCATCGCGGATAACAATGAG  | 0  | 9   | RDR2-sensitive |
| GCTTGCATTGCTGCACCGTTGGAT  | 0  | 13  | RDR2-sensitive |
| GCTTGCGGGCTGTCGGACCGGCAC  | 0  | 19  | RDR2-sensitive |
| GCTTGCGGTCGTAGCACGGGGCGT  | 1  | 13  | RDR2-sensitive |
| GCTTGCTCGTCGTAGTCGGATCGC  | 2  | 25  | RDR2-sensitive |
| GCTTGGACAGGAACTAGGCACGG   | 5  | 127 | RDR2-sensitive |
| GCTTGGACAGTATTCCGTGATGGT  | 36 | 0   | RDR2-resistant |
| GCTTGGACCAGCAGTTTAGCCCGT  | 0  | 10  | RDR2-sensitive |
| GCTTGGACCGGGCCAGAATCGTGC  | 0  | 23  | RDR2-sensitive |
| GCTTGGACGGAACACCGGGCGGCG  | 0  | 11  | RDR2-sensitive |
| GCTTGGACGGACGCCTAGACGGAC  | 0  | 17  | RDR2-sensitive |
| GCTTGGACTGCGGCGTAGGCCTAA  | 3  | 39  | RDR2-sensitive |
| GCTTGGACTGTCCATGGTGTTCAT  | 0  | 12  | RDR2-sensitive |
| GCTTGGACTGTGGCAGCGAGACGA  | 0  | 15  | RDR2-sensitive |
| GCTTGGATTCTGACTTAGAGGCGT  | 38 | 3   | RDR2-resistant |
| GCTTGGCACACCGGACTGTGCGGT  | 0  | 9   | RDR2-sensitive |
| GCTTGGCCCTGAAGACTGGACGGT  | 0  | 9   | RDR2-sensitive |
| GCTTGGCGAACTGTACATCGGCAA  | 4  | 107 | RDR2-sensitive |
| GCTTGGCGTAGACGAGGATGACGA  | 1  | 25  | RDR2-sensitive |
| GCTTGGCGTAGAGAAGACTCGGCT  | 0  | 52  | RDR2-sensitive |
| GCTTGGCTAGAACGTTCGACGACAT | 0  | 34  | RDR2-sensitive |
| GCTTGGCTCTGCTCGGATCGGCTC  | 1  | 39  | RDR2-sensitive |
| GCTTGGCTGTAACAGAGGAGATTA  | 0  | 9   | RDR2-sensitive |
| GCTTGGCTTCTGAGCGACGGTCAT  | 0  | 13  | RDR2-sensitive |
| GCTTGGGCGAACCGCGGAACAGGA  | 0  | 9   | RDR2-sensitive |
| GCTTGGGCTCCCTCTGCGCGGTGT  | 0  | 12  | RDR2-sensitive |
| GCTTGGGCTCTCTGCTGCGCGGTA  | 0  | 11  | RDR2-sensitive |
| GCTTGGGCTGCGGCGTAGGCTTAA  | 0  | 10  | RDR2-sensitive |
| GCTTGGTCGACTGTTGAAGTGCAA  | 0  | 44  | RDR2-sensitive |
| GCTTGGTCTTAGCTCGATATCGGC  | 19 | 0   | RDR2-resistant |
| GCTTGGTTGGTCTCTGGCAGACGG  | 0  | 19  | RDR2-sensitive |
| GCTTGTACGCGAGGAACGATGGCT  | 0  | 20  | RDR2-sensitive |
| GCTTGTACGGACTTGGTCGGTCTA  | 0  | 11  | RDR2-sensitive |
| GCTTGTGAGCGGACCGGTATCAC   | 1  | 23  | RDR2-sensitive |
| GCTTGTGAGCGGATGGACGTCAA   | 2  | 52  | RDR2-sensitive |
| GCTTGTGAGCGGATGGACGTCAC   | 2  | 23  | RDR2-sensitive |
| GCTTGTGAGCGGATTGACGTCAC   | 0  | 9   | RDR2-sensitive |
| GCTTGTGAGCGGATTGACGTCAT   | 9  | 161 | RDR2-sensitive |
| GCTTGTGCGGTAGGACAGTTCGGC  | 0  | 31  | RDR2-sensitive |
| GCTTGTGCGAACTCCGTATGGTGC  | 0  | 27  | RDR2-sensitive |
| GCTTGTTCGGACAACGCATACAAC  | 3  | 22  | RDR2-sensitive |

|                          |     |     |                |
|--------------------------|-----|-----|----------------|
| GCTTGTTTCTGTGGAGCCAGGCTG | 0   | 9   | RDR2-sensitive |
| GCTTGTTTGCAGATGGACGGACCT | 0   | 9   | RDR2-sensitive |
| GCTTTACTGTTAGAGCAGGGTGTT | 131 | 0   | RDR2-resistant |
| GCTTTAGCGGTCTGCTGGACACAG | 0   | 13  | RDR2-sensitive |
| GCTTTAGGACGGCCGCTGACGGCT | 0   | 9   | RDR2-sensitive |
| GCTTTATAGTTAGGACTGGGCGTT | 0   | 10  | RDR2-sensitive |
| GCTTTCAATTGCCACGATCGCGGT | 0   | 16  | RDR2-sensitive |
| GCTTTCAGGAGTAGGACGGTGTTA | 0   | 22  | RDR2-sensitive |
| GCTTTCGGACTTCAGAGGGTGTTG | 0   | 21  | RDR2-sensitive |
| GCTTTCCTCGGCGACGGCTCTAGC | 38  | 1   | RDR2-resistant |
| GCTTTCGCTGATCGTATGGAGTAA | 0   | 22  | RDR2-sensitive |
| GCTTTCACGACAGTATGGACGGT  | 0   | 22  | RDR2-sensitive |
| GCTTTCAGATGCGTGGACGGT    | 2   | 32  | RDR2-sensitive |
| GCTTTCAGGTCAGGCGCGGACGGT | 7   | 33  | RDR2-sensitive |
| GCTTTGAAGTAGGGCAGGAAACGA | 0   | 11  | RDR2-sensitive |
| GCTTTGCAGTGAGGACGGAATGAG | 0   | 10  | RDR2-sensitive |
| GCTTTGCAGTGAGGACGGAATGGG | 1   | 15  | RDR2-sensitive |
| GCTTTGCGACCTGATAGCGGCATA | 18  | 0   | RDR2-resistant |
| GCTTTGGACGGACGGACTGGGCGT | 0   | 58  | RDR2-sensitive |
| GCTTTGGCGTGGGACAGACGAGAG | 1   | 18  | RDR2-sensitive |
| GCTTTGGCGTGGGACAGACGAGGA | 0   | 10  | RDR2-sensitive |
| GCTTTGGGACGGCCTGTTAGGCAC | 0   | 9   | RDR2-sensitive |
| GCTTTGGTACATTTAGGCATGACT | 17  | 0   | RDR2-resistant |
| GCTTTGTCTCTGTCGGACCAGCGG | 0   | 18  | RDR2-sensitive |
| GCTTTGTGCGGATCTGTTGGGAGC | 0   | 19  | RDR2-sensitive |
| GCTTTTGGGTAGGACGACGTCGTT | 1   | 25  | RDR2-sensitive |
| GCTTTTGGGTAGGACGGTGCTGTT | 0   | 9   | RDR2-sensitive |
| GCTTTTGGGTAGGATGACGTCGTT | 0   | 9   | RDR2-sensitive |
| GCTTTTGTAGGCCTGTGACGTGCC | 0   | 172 | RDR2-sensitive |
| GCTTTTGTGCGACACGTAGATCGG | 0   | 30  | RDR2-sensitive |
| GCTTTTGTGGGCCTGTGCCGTGCC | 1   | 15  | RDR2-sensitive |
| GCTTTTTAGTAGACCGCTGCGGAC | 0   | 11  | RDR2-sensitive |
| GCTTTTTCGGAGTAGGACGGTGTT | 1   | 13  | RDR2-sensitive |
| GCTTTTTGGAGTAGGACGGTGTTA | 0   | 14  | RDR2-sensitive |
| GCTTTTTGGTGTAGGACGGTGTTA | 0   | 16  | RDR2-sensitive |
| GCTTTTTGTTGGACACTCGGCATA | 0   | 36  | RDR2-sensitive |
| GCTTTTTTATCGGACACTCGGCAA | 1   | 57  | RDR2-sensitive |
| GCTTTTTTCTAAATCGTTTGGCAA | 0   | 11  | RDR2-sensitive |
| GGAAACAGTGTAGGCCGTCGGAAA | 1   | 51  | RDR2-sensitive |
| GGAAACTGAGCACAGGATGGACGC | 3   | 21  | RDR2-sensitive |
| GGAAACTGTAGCCCCTATACGGTG | 1   | 22  | RDR2-sensitive |
| GGAAATAGAGCTATTTTCGACGGT | 0   | 11  | RDR2-sensitive |
| GGAAATGGGCCAAGACGATGTCGA | 0   | 9   | RDR2-sensitive |
| GGAACAACAAGGTCGTCCGACATC | 2   | 18  | RDR2-sensitive |
| GGAACACGATGGTCAGTCGGCGAG | 0   | 10  | RDR2-sensitive |
| GGAACACGGGATCGACGAGGACGC | 0   | 12  | RDR2-sensitive |
| GGAACACTCGGCACAGAACGACAC | 0   | 16  | RDR2-sensitive |
| GGAACACTCGGCATAGACAGACAC | 0   | 10  | RDR2-sensitive |
| GGAACAGTCGGAAAGGCAGTAGTC | 0   | 23  | RDR2-sensitive |

|                          |    |    |                |
|--------------------------|----|----|----------------|
| GGAACAGTCGGAGAGGCAGTAGTC | 4  | 20 | RDR2-sensitive |
| GGAACCAGGCTCGGCTCGGCTCAA | 0  | 16 | RDR2-sensitive |
| GGAACCCGGACTGTTCGGCCATA  | 0  | 30 | RDR2-sensitive |
| GGAACCGACTGTGTAGAGGCTAAC | 0  | 11 | RDR2-sensitive |
| GGAACCGGACTGCCGACACACGGC | 1  | 20 | RDR2-sensitive |
| GGAACCGTCGCAGAAGGAGGACAA | 0  | 10 | RDR2-sensitive |
| GGAACCGTCGGAAGTAGTGGAGGC | 0  | 22 | RDR2-sensitive |
| GGAACCGTTGGAAGTAGTGGAGGC | 0  | 12 | RDR2-sensitive |
| GGAACGAAGGCAGAACCGTGCACC | 0  | 9  | RDR2-sensitive |
| GGAACGCGGCGCATCCGAATTCGA | 0  | 9  | RDR2-sensitive |
| GGAACGGAAACGGGAGCGGGATAA | 0  | 10 | RDR2-sensitive |
| GGAACGGACAGTAACGGTAGCCAT | 0  | 12 | RDR2-sensitive |
| GGAACGGGCTCGACGAGATGAAGC | 0  | 9  | RDR2-sensitive |
| GGAACGGTCGAACGGAACAGCAGA | 0  | 14 | RDR2-sensitive |
| GGAACGTTGTACGGCGTGGTAGAC | 0  | 16 | RDR2-sensitive |
| GGAACTCTATGGTCGCAGCGGTGT | 0  | 10 | RDR2-sensitive |
| GGAACTGACACAGGCGGAACTGAC | 0  | 10 | RDR2-sensitive |
| GGAACTGGGCAGAGGACTCGCGGA | 0  | 18 | RDR2-sensitive |
| GGAACTGTTCGGCATAGATCCAC  | 1  | 14 | RDR2-sensitive |
| GGAAGAAATCGCCGGCGACGTCAG | 1  | 30 | RDR2-sensitive |
| GGAAGAATCTGGCTGTGTAGAGAA | 1  | 12 | RDR2-sensitive |
| GGAAGACGACGAACTCCGCCTCGC | 0  | 15 | RDR2-sensitive |
| GGAAGACGACGAACTCCGCTTCGC | 4  | 28 | RDR2-sensitive |
| GGAAGACGGCGAACTCCGCTCCGC | 14 | 84 | RDR2-sensitive |
| GGAAGACGGCGAACTCCGCTCTGC | 0  | 9  | RDR2-sensitive |
| GGAAGACGTCATGTAGGAGCCAGC | 0  | 9  | RDR2-sensitive |
| GGAAGAGGTCACCGTTGTAGGCAA | 0  | 15 | RDR2-sensitive |
| GGAAGATCGCCGACGGCGCCTGGA | 2  | 15 | RDR2-sensitive |
| GGAAGATCTGTGGAATAAGGGCAT | 0  | 11 | RDR2-sensitive |
| GGAAGATCTGTGGAATAGGGGCAT | 0  | 18 | RDR2-sensitive |
| GGAAGCGGCGTTGACTCGGTTTGT | 0  | 9  | RDR2-sensitive |
| GGAAGCGTTGCACTGTATGCGGCT | 0  | 20 | RDR2-sensitive |
| GGAAGCTCGGCGCAATGATGACG  | 0  | 12 | RDR2-sensitive |
| GGAAGGAAATCGGGCACCGGACAG | 0  | 13 | RDR2-sensitive |
| GGAAGGACTGTGCACTGCATTCAT | 0  | 16 | RDR2-sensitive |
| GGAAGGAGGCTAGTAGGAACGGTC | 1  | 17 | RDR2-sensitive |
| GGAAGGAGGTAGAGCTGTACGGGC | 0  | 11 | RDR2-sensitive |
| GGAAGGATGTCGGGCAGAACACGG | 1  | 14 | RDR2-sensitive |
| GGAAGGATTCGGACCACAATGGGA | 15 | 0  | RDR2-resistant |
| GGAAGGCCAGGTAGAGCGGTTGGT | 2  | 56 | RDR2-sensitive |
| GGAAGGCGGGCTGGGCAGCAGCTA | 46 | 10 | RDR2-resistant |
| GGAAGGCGGTCTGAACTCTAGGAG | 0  | 10 | RDR2-sensitive |
| GGAAGGCTGTAGACAGGTCGTCAG | 1  | 60 | RDR2-sensitive |
| GGAAGGCTGTAGTAGGGCCATGAA | 0  | 12 | RDR2-sensitive |
| GGAAGGCTGTAGTCGGGCCGTGAA | 8  | 29 | RDR2-sensitive |
| GGAAGGCTGTGGATGATCCGGTAT | 0  | 26 | RDR2-sensitive |
| GGAAGGGAGACGGGTTCTCTACAT | 1  | 16 | RDR2-sensitive |
| GGAAGGGCTCGCCGGAAGAAACAA | 0  | 11 | RDR2-sensitive |
| GGAAGGGGACAGTGAACAAGGCAT | 1  | 15 | RDR2-sensitive |

|                           |    |     |                |
|---------------------------|----|-----|----------------|
| GGAAGGGGCAGTACACAAGAACAC  | 0  | 33  | RDR2-sensitive |
| GGAAGGTAACAGAGCGCGGGGCAT  | 0  | 11  | RDR2-sensitive |
| GGAAGGTCGTATGACGGACGGCGT  | 0  | 26  | RDR2-sensitive |
| GGAAGGTCTGCGTACTCAGGTCAA  | 0  | 33  | RDR2-sensitive |
| GGAAGTCAAACTGAGAGCGGCAA   | 0  | 31  | RDR2-sensitive |
| GGAAGTCTTGGACGTTGACAGCAC  | 0  | 15  | RDR2-sensitive |
| GGAATAGACTGGGGCAGAACGCGG  | 0  | 10  | RDR2-sensitive |
| GGAATAGTCGGGAACGGAAACGGG  | 1  | 24  | RDR2-sensitive |
| GGAATCTTGCTGACGTGACTGCAT  | 0  | 12  | RDR2-sensitive |
| GGAATCTTGCTGACGTGGCTGCAT  | 1  | 13  | RDR2-sensitive |
| GGAATCTTTTAGAGAAGACTGTAA  | 1  | 33  | RDR2-sensitive |
| GGAATGGACGAGCCGAGCCGAGCC  | 0  | 10  | RDR2-sensitive |
| GGAATGGACGAGCCGAGCCGAGCT  | 0  | 12  | RDR2-sensitive |
| GGAATGGATTGGGGAGGGATGGAA  | 0  | 23  | RDR2-sensitive |
| GGAATGGGAATGGCAGAACACGGA  | 2  | 40  | RDR2-sensitive |
| GGAATGGGAATGGCAGAACATGGA  | 0  | 10  | RDR2-sensitive |
| GGAATGGGAATGGCAGAACCAGGA  | 0  | 18  | RDR2-sensitive |
| GGAATGGGCAGAACGCAGAATGGC  | 0  | 17  | RDR2-sensitive |
| GGAATGGGCAGAACGCGGAATGAC  | 0  | 19  | RDR2-sensitive |
| GGAATGGGCAGAACGCGGAATGGC  | 10 | 32  | RDR2-sensitive |
| GGAATGGTCCGGATCTGAGGAGA   | 6  | 64  | RDR2-sensitive |
| GGAATGTCACGGCATAGGCACTGA  | 0  | 11  | RDR2-sensitive |
| GGAATTATGGGTTCCGATTCGGTT  | 0  | 10  | RDR2-sensitive |
| GGAATTCCTCTCCGGTCGTGCGC   | 0  | 14  | RDR2-sensitive |
| GGAATTGCGGGACTGCAGGACGGC  | 0  | 9   | RDR2-sensitive |
| GGAATTTTAGATCGGAATCGGTAT  | 0  | 21  | RDR2-sensitive |
| GGACAACCTTTGGCTGTTGGGCTGC | 0  | 13  | RDR2-sensitive |
| GGACAAGAAGGACTGTGCGGCCAT  | 0  | 9   | RDR2-sensitive |
| GGACACACCGCGGATACTTCTGGA  | 0  | 13  | RDR2-sensitive |
| GGACACGACTGAGGAGTGGACGTG  | 0  | 9   | RDR2-sensitive |
| GGACAGAACAGTCAGCCCGTCGGG  | 0  | 16  | RDR2-sensitive |
| GGACAGATCGACGCGCAGGAGCCT  | 0  | 14  | RDR2-sensitive |
| GGACAGGGCTTGTAGAGAGGTTGT  | 0  | 18  | RDR2-sensitive |
| GGACAGTCCGCCGGCTCATTCTG   | 0  | 11  | RDR2-sensitive |
| GGACAGTCGGGACGCATTGGACGG  | 0  | 18  | RDR2-sensitive |
| GGACAGTCTGAACGTATGCAGAGC  | 0  | 10  | RDR2-sensitive |
| GGACATCTTGTGATCGGTATGGCT  | 20 | 1   | RDR2-resistant |
| GGACCAGGGGTTGTAGAACGACGG  | 0  | 15  | RDR2-sensitive |
| GGACCAGTTGAACGGACCGAGCAG  | 0  | 16  | RDR2-sensitive |
| GGACCCGACGCGACTGACGGATAA  | 0  | 10  | RDR2-sensitive |
| GGACCCGGCTGAAAGACGTACCCA  | 2  | 168 | RDR2-sensitive |
| GGACCGACACGTAGAGGGCGCTGT  | 0  | 13  | RDR2-sensitive |
| GGACCGACCGTAGAGGGCGCTGT   | 0  | 9   | RDR2-sensitive |
| GGACCGACGGTACTTACTCTGGC   | 3  | 25  | RDR2-sensitive |
| GGACCGATGGACTAACGGGCTGGC  | 0  | 11  | RDR2-sensitive |
| GGACCGCAGGTAGATTTGGACGGC  | 1  | 12  | RDR2-sensitive |
| GGACCGCGGACCGTTCGGCCTCAG  | 4  | 33  | RDR2-sensitive |
| GGACCGGACTAGCACGAATTGCAT  | 0  | 32  | RDR2-sensitive |
| GGACCGGATTGTCGCGATGGCGT   | 0  | 13  | RDR2-sensitive |

|                           |    |    |                |
|---------------------------|----|----|----------------|
| GGACCGGGCTAAATTCGTGGCGTG  | 0  | 9  | RDR2-sensitive |
| GGACCGGGCTATATGGGACGACAT  | 1  | 46 | RDR2-sensitive |
| GGACCGTCCGCGCCTGACCAGAGA  | 1  | 17 | RDR2-sensitive |
| GGACCTGGACTCAAAGCTCGGCGC  | 1  | 32 | RDR2-sensitive |
| GGACGACAGCGCGCAGGTAGCTC   | 5  | 57 | RDR2-sensitive |
| GGACGACGACTGATTCGGAACGGA  | 1  | 14 | RDR2-sensitive |
| GGACGACTGAGATCGCAGAATGGC  | 0  | 10 | RDR2-sensitive |
| GGACGACTGTGAAGACGACGATGT  | 0  | 10 | RDR2-sensitive |
| GGACGCAATCGGACGGTCCGAGATA | 0  | 14 | RDR2-sensitive |
| GGACGCGACTCGAACTCGGATGGC  | 0  | 20 | RDR2-sensitive |
| GGACGGAAACGGACGGAAAAACCC  | 0  | 13 | RDR2-sensitive |
| GGACGGACGGTCCACGACCTGCGA  | 2  | 14 | RDR2-sensitive |
| GGACGGCGTAGAGAACGTTTCGTA  | 0  | 15 | RDR2-sensitive |
| GGACGGCTGAGATCGCAGAACGGC  | 1  | 42 | RDR2-sensitive |
| GGACGGCTGAGATCGCAGAATGAC  | 2  | 15 | RDR2-sensitive |
| GGACGGCTGAGATCGCAGAATGGC  | 0  | 22 | RDR2-sensitive |
| GGACGGTCCAGATCGATGGACGGC  | 0  | 15 | RDR2-sensitive |
| GGACGGTCCGCGGCGTAAGGCTAC  | 0  | 10 | RDR2-sensitive |
| GGACGGTCCGCGTCTGAGACTCGG  | 0  | 10 | RDR2-sensitive |
| GGACGGTCGCGACAGAACACGGTA  | 0  | 12 | RDR2-sensitive |
| GGACGGTCGTACCCTAGAGCCGGA  | 0  | 55 | RDR2-sensitive |
| GGACGGTTGAGATTGCAGAACGGT  | 0  | 23 | RDR2-sensitive |
| GGACGGTTGGCTCGGACCTGGCAC  | 2  | 16 | RDR2-sensitive |
| GGACGTACCTGGAAGTGAAGGCGC  | 0  | 10 | RDR2-sensitive |
| GGACGTGGAAGTGTAGATGACTGT  | 0  | 11 | RDR2-sensitive |
| GGACGTGGGACTAGCAGACTTCGT  | 0  | 21 | RDR2-sensitive |
| GGACGTTGTTGGGCGGAGACCGGA  | 0  | 16 | RDR2-sensitive |
| GGACTAAAGTCGGCATTGCAGCAG  | 0  | 9  | RDR2-sensitive |
| GGACTAGACTGAGACGGAGGACGA  | 0  | 54 | RDR2-sensitive |
| GGACTCAAGTCGGTATCACAGCAG  | 0  | 9  | RDR2-sensitive |
| GGACTCAGCCTAAGATCGACGGTG  | 0  | 16 | RDR2-sensitive |
| GGACTCCGTCCGGCTGGACAACGGC | 0  | 10 | RDR2-sensitive |
| GGACTCGTTCTGAACGTCGAGCTG  | 0  | 22 | RDR2-sensitive |
| GGACTGACCGGCTGCATGAGGATT  | 14 | 0  | RDR2-resistant |
| GGACTGGACTGTCCGCGATGACGC  | 1  | 23 | RDR2-sensitive |
| GGACTGGCTACTGTAGTTCACGGG  | 0  | 12 | RDR2-sensitive |
| GGACTGGCTGAGTGCATGCAGTAT  | 0  | 10 | RDR2-sensitive |
| GGACTGTTGAGGCAAGGACATGGT  | 17 | 1  | RDR2-resistant |
| GGACTGTTGTAGGAGTGTAGGCGC  | 1  | 12 | RDR2-sensitive |
| GGACTTGCTCGGCGTTGACTTGAT  | 0  | 22 | RDR2-sensitive |
| GGACTTGACAGGAAACTAGGCAC   | 0  | 15 | RDR2-sensitive |
| GGACTTGACTGGAAACTAGGCAC   | 0  | 17 | RDR2-sensitive |
| GGAGAAAAGACGGCGTCCGTACCT  | 0  | 11 | RDR2-sensitive |
| GGAGAAAGTCGACGAGCACTGCTT  | 0  | 13 | RDR2-sensitive |
| GGAGAACGGACAAAGGACGGACGG  | 0  | 16 | RDR2-sensitive |
| GGAGAACGTAGCAGCATGAGCGGA  | 0  | 21 | RDR2-sensitive |
| GGAGAACTCGAGGCCAGATCAGGC  | 2  | 19 | RDR2-sensitive |
| GGAGAACTCTCCCGTTGCAGTGGA  | 49 | 0  | RDR2-resistant |
| GGAGAAGAATAGTCGGGCCGAC    | 0  | 10 | RDR2-sensitive |

|                           |    |     |                |
|---------------------------|----|-----|----------------|
| GGAGAAGACGGAAGTGTTCAGGCG  | 0  | 9   | RDR2-sensitive |
| GGAGAAGGACAAGTGTAGGAGGGC  | 0  | 9   | RDR2-sensitive |
| GGAGAATCATGTAGAGATGGGCTC  | 0  | 14  | RDR2-sensitive |
| GGAGAATCGTGTAGAGACGGGCTC  | 0  | 9   | RDR2-sensitive |
| GGAGAATCTGACTGTGGAGAGGAT  | 1  | 28  | RDR2-sensitive |
| GGAGACAGAGTTAGACGTGTGGTA  | 1  | 26  | RDR2-sensitive |
| GGAGACCGGACGGAAGAAAACGCT  | 0  | 14  | RDR2-sensitive |
| GGAGACGACGGCCTAGACCACTCA  | 0  | 15  | RDR2-sensitive |
| GGAGACGATGAACCCCAAGAGCAT  | 1  | 31  | RDR2-sensitive |
| GGAGACGATGAACCCCAGGAGCAT  | 2  | 15  | RDR2-sensitive |
| GGAGACGCAGGCTGCATGAGCGGA  | 0  | 12  | RDR2-sensitive |
| GGAGACGCGCGGGCTGTTCCGGCGT | 1  | 12  | RDR2-sensitive |
| GGAGACGGATGCAGAGGCTGCTGG  | 0  | 13  | RDR2-sensitive |
| GGAGACGGATGCGGAGACTGCTGG  | 1  | 31  | RDR2-sensitive |
| GGAGACGGATGCGGAGGCTGCTGG  | 1  | 20  | RDR2-sensitive |
| GGAGACGGATTGTAACGGGTCCAA  | 0  | 14  | RDR2-sensitive |
| GGAGACGGGCGTGAGAGAGGTGGA  | 0  | 9   | RDR2-sensitive |
| GGAGACGTAGACCACGAACGGCGA  | 0  | 10  | RDR2-sensitive |
| GGAGACGTAGACCGCAACGGCGA   | 0  | 30  | RDR2-sensitive |
| GGAGACGTAGAGGATCTGACCGTC  | 0  | 11  | RDR2-sensitive |
| GGAGACGTTCGTATATGTACAGCAC | 0  | 9   | RDR2-sensitive |
| GGAGACGTGGAGAAGATCGGCAGC  | 0  | 9   | RDR2-sensitive |
| GGAGACTCACGTGGGATTCGGCCT  | 1  | 58  | RDR2-sensitive |
| GGAGACTCGGCGAGACGGTAACAT  | 1  | 12  | RDR2-sensitive |
| GGAGACTGAAGACGGTAGGGTCGT  | 0  | 11  | RDR2-sensitive |
| GGAGACTGAGTCAGACAAGTGGTA  | 0  | 10  | RDR2-sensitive |
| GGAGACTGATCAATCGGACACCGC  | 4  | 138 | RDR2-sensitive |
| GGAGACTGCTGAGCAGGAGCTCGT  | 0  | 29  | RDR2-sensitive |
| GGAGACTGCTGGAGAGCGAAACGG  | 1  | 37  | RDR2-sensitive |
| GGAGACTGGATCTAACAGCGGCGT  | 0  | 13  | RDR2-sensitive |
| GGAGACTGTAAAGGACGGATATAG  | 0  | 9   | RDR2-sensitive |
| GGAGACTGTGAGATCCGGTAGCCA  | 0  | 30  | RDR2-sensitive |
| GGAGACTGTGTAAAGGCACCGAAC  | 0  | 28  | RDR2-sensitive |
| GGAGACTGTGTAGCCGGAGCCGGT  | 0  | 31  | RDR2-sensitive |
| GGAGAGAATCTGACTGTGGAAGA   | 0  | 13  | RDR2-sensitive |
| GGAGAGAATCTGGCTGTGAGGAGA  | 0  | 15  | RDR2-sensitive |
| GGAGAGAATCTGGCTGTGGCGAAA  | 0  | 17  | RDR2-sensitive |
| GGAGAGAATCTGGCTGTGGAAGA   | 2  | 16  | RDR2-sensitive |
| GGAGAGACATTGGCACTTGGTCGA  | 0  | 9   | RDR2-sensitive |
| GGAGAGAGAACGCTGACGTGGCAC  | 0  | 10  | RDR2-sensitive |
| GGAGAGCAGGGTGACGGAGGACTC  | 0  | 9   | RDR2-sensitive |
| GGAGAGGACGACGTGCAGCCTGAT  | 0  | 13  | RDR2-sensitive |
| GGAGAGGAGAGAGAATGTGTCCGC  | 3  | 25  | RDR2-sensitive |
| GGAGAGGATCGTGAACAGGAGGC   | 71 | 1   | RDR2-resistant |
| GGAGAGGCTCTGCACGGACGGGAA  | 1  | 23  | RDR2-sensitive |
| GGAGATAAGACACTGCCGTCGGAC  | 0  | 10  | RDR2-sensitive |
| GGAGATAAGGCTTGACCGTCGGAA  | 0  | 21  | RDR2-sensitive |
| GGAGATAAGGCTTTGCCGTCGGAA  | 1  | 13  | RDR2-sensitive |
| GGAGATACTAGAACCGCTGACGGA  | 0  | 19  | RDR2-sensitive |

|                             |     |     |                |
|-----------------------------|-----|-----|----------------|
| GGAGATACTAGAGCCGCTGACGGA    | 1   | 12  | RDR2-sensitive |
| GGAGATACTAGAGCCGCTGCCGGA    | 4   | 21  | RDR2-sensitive |
| GGAGATACTAGAGCTGCTGCCGGA    | 0   | 9   | RDR2-sensitive |
| GGAGATACTCGGCAGAACCGTGCA    | 0   | 12  | RDR2-sensitive |
| GGAGATAGGTTAATGCCGTCGGAC    | 0   | 9   | RDR2-sensitive |
| GGAGATCCGGCGACTGGGGGACGG    | 0   | 10  | RDR2-sensitive |
| GGAGATCCTCGGCAGAACCGTGCA    | 0   | 12  | RDR2-sensitive |
| GGAGATCCTGGACGGGAGCACGGT    | 0   | 14  | RDR2-sensitive |
| GGAGATCGGGCTGTCTGGGGTTGGC   | 0   | 18  | RDR2-sensitive |
| GGAGATCGGTAGAACGAGCAGAGT    | 0   | 16  | RDR2-sensitive |
| GGAGATGGGTCTGGTCAGGACGAC    | 1   | 13  | RDR2-sensitive |
| GGAGATTGAGGGACGGCAGAACGG    | 0   | 10  | RDR2-sensitive |
| GGAGATTTGTTACCTGGACAGCGG    | 0   | 14  | RDR2-sensitive |
| GGAGCAAAGACTGTTGACGGCAT     | 0   | 27  | RDR2-sensitive |
| GGAGCAACTCGGCTCGGCTCGAAG    | 16  | 0   | RDR2-resistant |
| GGAGCACCGGACTGTCCGATGGCA    | 0   | 20  | RDR2-sensitive |
| GGAGCACTCGGCATGTGGAGACCA    | 0   | 15  | RDR2-sensitive |
| GGAGCATCGCTGTAGGTACAGGCT    | 0   | 21  | RDR2-sensitive |
| GGAGCATCTGATGTCGGACGACAC    | 0   | 26  | RDR2-sensitive |
| GGAGCATCTGGAAGGACGGTCTGG    | 0   | 16  | RDR2-sensitive |
| GGAGCCGGATATGGATACATGTTT    | 0   | 11  | RDR2-sensitive |
| GGAGCCGTAGGGAACCTGACGGAC    | 0   | 9   | RDR2-sensitive |
| GGAGCGACGGGCGGTGTGTACAAA    | 71  | 3   | RDR2-resistant |
| GGAGCGACTGAATCGGATGACATC    | 0   | 15  | RDR2-sensitive |
| GGAGCGAGATCCAGGCGCCGTCGG    | 0   | 15  | RDR2-sensitive |
| GGAGCGAGCTGTAGACGGGTTCAA    | 2   | 107 | RDR2-sensitive |
| GGAGCGAGTTGTAGACGGGTTCAA    | 0   | 9   | RDR2-sensitive |
| GGAGCGATGTAGGGAGGATGGGCG    | 0   | 14  | RDR2-sensitive |
| GGAGCGCGCGAGCTGTAGCGACGG    | 1   | 21  | RDR2-sensitive |
| GGAGCGGAGGGACGGCAGAACCGT    | 0   | 10  | RDR2-sensitive |
| GGAGCGTCGTAGCGACCGCGGCTC    | 0   | 10  | RDR2-sensitive |
| GGAGCGTGACTIONGTACGAGCAGGCT | 0   | 9   | RDR2-sensitive |
| GGAGCGTGACTIONGTGAGAGCGGGAT | 6   | 72  | RDR2-sensitive |
| GGAGCGTTTGAGCCCTGTAGAAGC    | 1   | 12  | RDR2-sensitive |
| GGAGCTCAGTCCTGCTGTAGATGG    | 3   | 39  | RDR2-sensitive |
| GGAGCTCGGACGGCCTGCTATGGC    | 0   | 9   | RDR2-sensitive |
| GGAGCTGATCCGGATCTGCTTGGGA   | 0   | 11  | RDR2-sensitive |
| GGAGCTGGACCATGCACTAGACGA    | 0   | 12  | RDR2-sensitive |
| GGAGCTGGGCTGTGGCGCAGAGAA    | 0   | 9   | RDR2-sensitive |
| GGAGCTGTGGAGTAGTATACGGAC    | 0   | 10  | RDR2-sensitive |
| GGAGGAAACTGGAGCGGGGCGCGA    | 0   | 11  | RDR2-sensitive |
| GGAGGAAGACGAGCGAAGGGACGA    | 0   | 16  | RDR2-sensitive |
| GGAGGACAAGCCCATGGACGGTGA    | 0   | 12  | RDR2-sensitive |
| GGAGGACAGAATCTAGGGTTGCAT    | 0   | 9   | RDR2-sensitive |
| GGAGGACAGTAGCGCGGTGGTGGGA   | 129 | 51  | RDR2-resistant |
| GGAGGACATAGATGCGGATAGCAG    | 0   | 16  | RDR2-sensitive |
| GGAGGACATGAGCGCGGATAACAA    | 0   | 10  | RDR2-sensitive |
| GGAGGACATGGAAGACCGTTTGAA    | 0   | 24  | RDR2-sensitive |
| GGAGGACCTGCCGGCTTGACGGAG    | 0   | 10  | RDR2-sensitive |



|                           |     |    |                |
|---------------------------|-----|----|----------------|
| GGAGGACCTGTAGAGACGGAGCGA  | 0   | 12 | RDR2-sensitive |
| GGAGGACCTGTCTGAGCAGAGGCT  | 0   | 12 | RDR2-sensitive |
| GGAGGACCTTGCAGTACCGGCAAA  | 16  | 0  | RDR2-resistant |
| GGAGGACGAGGAGTAGGTTGGTAC  | 56  | 0  | RDR2-resistant |
| GGAGGACGCAGGATATGACGGATG  | 5   | 58 | RDR2-sensitive |
| GGAGGACGCGCTGCACAGCTTGAG  | 0   | 9  | RDR2-sensitive |
| GGAGGACGCGGGATATGATGGATG  | 1   | 17 | RDR2-sensitive |
| GGAGGACGGGCTGACGAACAGGCT  | 1   | 14 | RDR2-sensitive |
| GGAGGACTGACGCGCACCGACGG   | 0   | 19 | RDR2-sensitive |
| GGAGGACTGGACAGAGGTGGATGC  | 50  | 7  | RDR2-resistant |
| GGAGGACTTCATGACTTCACGGCT  | 0   | 9  | RDR2-sensitive |
| GGAGGACTTGTAGAGCATGATGGC  | 1   | 24 | RDR2-sensitive |
| GGAGGACTTTGACTATTTTGCGGC  | 37  | 0  | RDR2-resistant |
| GGAGGAGACTGTAAAGGACGGATA  | 0   | 17 | RDR2-sensitive |
| GGAGGAGCCCGTAGAAGACACGCT  | 0   | 9  | RDR2-sensitive |
| GGAGGAGCGCTGGAGCCTGGCGGA  | 1   | 12 | RDR2-sensitive |
| GGAGGATAGTGACCAGAGCCGGAC  | 101 | 0  | RDR2-resistant |
| GGAGGATCACGCAGTAGAGGGCTC  | 0   | 10 | RDR2-sensitive |
| GGAGGATCATACGACATGGACGAC  | 0   | 9  | RDR2-sensitive |
| GGAGGATCCGGAGTCTGAAGCGGT  | 0   | 10 | RDR2-sensitive |
| GGAGGATGACGTGCAGGACATCGT  | 0   | 15 | RDR2-sensitive |
| GGAGGATTGGGAGTAGAAGCGAGG  | 0   | 13 | RDR2-sensitive |
| GGAGGATTGTAGTATAGGGTAGAG  | 0   | 14 | RDR2-sensitive |
| GGAGGATTGTGGTATAGAGTGCTG  | 0   | 12 | RDR2-sensitive |
| GGAGGCATCATAGGGACTGGCGTC  | 0   | 9  | RDR2-sensitive |
| GGAGGCATCCTGTACGACGGCGGG  | 88  | 4  | RDR2-resistant |
| GGAGGCATCCTGTACGACGGCGGT  | 582 | 34 | RDR2-resistant |
| GGAGGCATGCAGGACAGACGACGT  | 0   | 13 | RDR2-sensitive |
| GGAGGCCGAGATGGACTATTAGTGT | 0   | 10 | RDR2-sensitive |
| GGAGGCCGAGGTAGACAGGGCGGG  | 0   | 11 | RDR2-sensitive |
| GGAGGCCGTCAGACGTAGGACGGCT | 2   | 28 | RDR2-sensitive |
| GGAGGCTCGAAGCGATACTGACGT  | 51  | 83 | RDR2-sensitive |
| GGAGGCTGGCATAAACAGAACACA  | 0   | 10 | RDR2-sensitive |
| GGAGGCTGGGTAGGAGAGAGACGA  | 0   | 25 | RDR2-sensitive |
| GGAGGCTGTCTGTTTCGATGGCGCA | 2   | 24 | RDR2-sensitive |
| GGAGGGACGAAGACGGACGAAGAC  | 1   | 18 | RDR2-sensitive |
| GGAGGGACGAGAGAGAACGACAGG  | 0   | 26 | RDR2-sensitive |
| GGAGGGACGAGAGAGGACACCAGG  | 0   | 22 | RDR2-sensitive |
| GGAGGGACGAGAGAGGACGCCAGG  | 2   | 30 | RDR2-sensitive |
| GGAGGGACGAGAGAGGACGTCAGG  | 0   | 10 | RDR2-sensitive |
| GGAGGGACGGCAGAACCGTGCGCC  | 0   | 13 | RDR2-sensitive |
| GGAGGGACTCAGCACTAGACCTGA  | 0   | 11 | RDR2-sensitive |
| GGAGGGATCCGTTGGACATGGCAT  | 21  | 0  | RDR2-resistant |
| GGAGGGCAGAACGGCAGAACAGCA  | 0   | 28 | RDR2-sensitive |
| GGAGGGCCTTGTAGAGGACGCTGT  | 0   | 24 | RDR2-sensitive |
| GGAGGGCGCTGCGCAGATCGACGT  | 18  | 0  | RDR2-resistant |
| GGAGGGCGTTGGGGCAGCGTGGCC  | 31  | 0  | RDR2-resistant |
| GGAGGGCTGTATTCCACGACGCAG  | 0   | 9  | RDR2-sensitive |
| GGAGGGGCTGACAGAGGGCTGCGT  | 0   | 9  | RDR2-sensitive |

|                           |    |    |                |
|---------------------------|----|----|----------------|
| GGAGGGTCTTGTAGAGACGAGCTC  | 0  | 10 | RDR2-sensitive |
| GGAGGGTGTAGGCTTACGGTACAG  | 0  | 17 | RDR2-sensitive |
| GGAGGTGACGTAGAGGAAGACCGA  | 0  | 9  | RDR2-sensitive |
| GGAGGTGCTGCCACGAGGACGATT  | 16 | 0  | RDR2-resistant |
| GGAGGTGGATATGTGGAAGACTAC  | 3  | 54 | RDR2-sensitive |
| GGAGGTGGATATGTGGAAGGCTAC  | 1  | 19 | RDR2-sensitive |
| GGAGGTTGACGGAGATACTAGAGC  | 1  | 28 | RDR2-sensitive |
| GGAGGTTGACGGAGATACTGGAGC  | 1  | 20 | RDR2-sensitive |
| GGAGGTTGGTTGTGCGGAGCGGAC  | 0  | 11 | RDR2-sensitive |
| GGAGTAAGCGTTTGGAGGCCAGAA  | 16 | 0  | RDR2-resistant |
| GGAGTACTGTAGACGCACGGAGAA  | 0  | 22 | RDR2-sensitive |
| GGAGTAGACGTAGCAGAACGACGA  | 0  | 11 | RDR2-sensitive |
| GGAGTAGACTGGAACGAGCCGAG   | 0  | 18 | RDR2-sensitive |
| GGAGTAGGACGGTGTCAACGACTG  | 9  | 29 | RDR2-sensitive |
| GGAGTAGGACGGTGTCCGACGACTG | 0  | 16 | RDR2-sensitive |
| GGAGTATCTGATGTCCGACGACAC  | 0  | 29 | RDR2-sensitive |
| GGAGTCAGATCTGGGAATGCCGGC  | 0  | 25 | RDR2-sensitive |
| GGAGTCCAGGACTGCAGGGGCGGT  | 1  | 16 | RDR2-sensitive |
| GGAGTCGAACCCAGGACCTGAGGA  | 0  | 12 | RDR2-sensitive |
| GGAGTCGAACCTCAGGACCTGAGGA | 2  | 16 | RDR2-sensitive |
| GGAGTCGAGTGCTGGACAGACGCA  | 0  | 10 | RDR2-sensitive |
| GGAGTCGAGTGCTGGACAGACGTA  | 0  | 11 | RDR2-sensitive |
| GGAGTCTGCTGGAACGGGGACGG   | 0  | 28 | RDR2-sensitive |
| GGAGTCTGCTGGAACGCACGGTGC  | 0  | 11 | RDR2-sensitive |
| GGAGTCTGTAGACTGGAGCAGCAG  | 0  | 10 | RDR2-sensitive |
| GGAGTGAAGTAGAACGGATCGGCT  | 0  | 18 | RDR2-sensitive |
| GGAGTGACTCTGAGGACGACGATG  | 0  | 10 | RDR2-sensitive |
| GGAGTGAGCTGTAGACGGGTTCAA  | 0  | 13 | RDR2-sensitive |
| GGAGTGAGTAGAGGACGATCTGAT  | 1  | 48 | RDR2-sensitive |
| GGAGTGAGTAGAGGACGTTCTGAT  | 1  | 37 | RDR2-sensitive |
| GGAGTGGACTGTCAGCGGCCTAGT  | 0  | 13 | RDR2-sensitive |
| GGAGTGGATTGAGGGGGATTGGAG  | 16 | 52 | RDR2-sensitive |
| GGAGTGGGAGGCAGAACCGTGCAC  | 0  | 27 | RDR2-sensitive |
| GGAGTTCAGGACTGTAGGGGCAGT  | 0  | 10 | RDR2-sensitive |
| GGAGTTCGGACCTACCCGGAGGCT  | 0  | 13 | RDR2-sensitive |
| GGAGTTGACTTGAGACCTAGGCAC  | 0  | 17 | RDR2-sensitive |
| GGAGTTGCTGAGCCGTCGGACGCT  | 0  | 9  | RDR2-sensitive |
| GGAGTTGGGAATGGGAATGGCAGA  | 0  | 13 | RDR2-sensitive |
| GGAGTTGGGCTGTCCGCGTGCCTA  | 0  | 13 | RDR2-sensitive |
| GGAGTTTCTTCTTCGTCGGATACT  | 26 | 0  | RDR2-resistant |
| GGATAACTCTTCGTCGACGAGCAA  | 0  | 16 | RDR2-sensitive |
| GGATACAGACGGATAGTAGGTCAT  | 0  | 11 | RDR2-sensitive |
| GGATACCCGATGGACGAAGACGAT  | 0  | 9  | RDR2-sensitive |
| GGATACGACGGACGTATGGATGGC  | 0  | 12 | RDR2-sensitive |
| GGATACGAGACGGATACGGGACGA  | 0  | 11 | RDR2-sensitive |
| GGATACGGAATCGAGTGGCTCAGA  | 0  | 9  | RDR2-sensitive |
| GGATACGGACGGATACTAGGTCAT  | 0  | 18 | RDR2-sensitive |
| GGATACGGACGGATATTAGCTCAT  | 0  | 83 | RDR2-sensitive |
| GGATACGGATACAGGGACCCGGATA | 3  | 24 | RDR2-sensitive |

|                           |    |    |                |
|---------------------------|----|----|----------------|
| GGATACGGATAGTTAGAAACGGGA  | 1  | 13 | RDR2-sensitive |
| GGATACGGGACGGATACGGAACAG  | 0  | 9  | RDR2-sensitive |
| GGATACGGGCTCTGTTGGAACGGT  | 0  | 35 | RDR2-sensitive |
| GGATACTTCGCGGATACTTTTGGGA | 0  | 9  | RDR2-sensitive |
| GGATAGAAGGAGCCGGTAGAAGCT  | 0  | 10 | RDR2-sensitive |
| GGATAGAGTCGGATACATGGTCAT  | 0  | 17 | RDR2-sensitive |
| GGATAGGACAACGACAGCTGACGA  | 0  | 15 | RDR2-sensitive |
| GGATAGGACAATGGCAGCTGACGA  | 0  | 10 | RDR2-sensitive |
| GGATAGGGGCATTTCGAGCGGATT  | 14 | 0  | RDR2-resistant |
| GGATAGGTACTGTGCGAAGTCCGG  | 0  | 13 | RDR2-sensitive |
| GGATAGTCCGGACTCAAGACGGGA  | 0  | 9  | RDR2-sensitive |
| GGATAGTGACCAGAGCCGGACGGC  | 79 | 0  | RDR2-resistant |
| GGATAGTTAGAAACGGGACGGATA  | 0  | 17 | RDR2-sensitive |
| GGATATAGAGGACGTTGCTGGAGA  | 0  | 22 | RDR2-sensitive |
| GGATATGACTGCGGGCGGATATTT  | 0  | 12 | RDR2-sensitive |
| GGATATGACTGGACGGAACCCGGC  | 1  | 71 | RDR2-sensitive |
| GGATATGCGGAAGGCTACAACCTAG | 0  | 10 | RDR2-sensitive |
| GGATATTAATGTAGTCGGATTAT   | 0  | 17 | RDR2-sensitive |
| GGATATTATTTGATCGGATATCGG  | 5  | 21 | RDR2-sensitive |
| GGATCAATGTTTGACTGTCGCGTG  | 42 | 2  | RDR2-resistant |
| GGATCCAAACACGTAGAGGGCTAG  | 0  | 13 | RDR2-sensitive |
| GGATCCATCTCTTCGGGCGGTTAG  | 0  | 14 | RDR2-sensitive |
| GGATCCGATCGGCATCGACTCTCC  | 0  | 10 | RDR2-sensitive |
| GGATCCGGATTGAGTGATGGCCAT  | 2  | 24 | RDR2-sensitive |
| GGATCCGTTGGACATGGCATGGCC  | 40 | 0  | RDR2-resistant |
| GGATCGAACTGGGACTAGAGGACG  | 0  | 17 | RDR2-sensitive |
| GGATCGACGATTCGGGTAGGGACG  | 0  | 10 | RDR2-sensitive |
| GGATCGACTTGACTCACGAGGCAT  | 0  | 15 | RDR2-sensitive |
| GGATCGAGTACGGACGGATATCAC  | 0  | 9  | RDR2-sensitive |
| GGATCGGACAACCTCCTCACGGTGT | 0  | 9  | RDR2-sensitive |
| GGATCGGACCGAGTCGGTAAGCAC  | 0  | 11 | RDR2-sensitive |
| GGATCGGATACGCATGGAAACGGA  | 0  | 17 | RDR2-sensitive |
| GGATCGGATGTGGATCACCCACGG  | 0  | 15 | RDR2-sensitive |
| GGATCGGCGCGAGACGGAACACAA  | 0  | 14 | RDR2-sensitive |
| GGATCGGGATGGCAGAACCGTGCA  | 0  | 11 | RDR2-sensitive |
| GGATCGGGCTGGGACCAGAGGACC  | 0  | 11 | RDR2-sensitive |
| GGATCGGGCTGGGACCAGAGGATG  | 0  | 26 | RDR2-sensitive |
| GGATCGGTACCTGCAGGCCATGGC  | 0  | 10 | RDR2-sensitive |
| GGATCTGCGTCCGAGGCTGTCTGG  | 0  | 11 | RDR2-sensitive |
| GGATCTGGACTCGACGCTCGGCGC  | 0  | 11 | RDR2-sensitive |
| GGATCTTAATCTTATCGTCAGAGA  | 23 | 2  | RDR2-resistant |
| GGATCTTATTTTCGTCGTCGGAAT  | 0  | 14 | RDR2-sensitive |
| GGATCTTCCGCTTCCGGTCGTTGA  | 0  | 10 | RDR2-sensitive |
| GGATGAATCAACCCGGCTTAGAAT  | 0  | 9  | RDR2-sensitive |
| GGATGACACGTCACGAAGCTCGGC  | 0  | 12 | RDR2-sensitive |
| GGATGACTCTATAGGTGCTGACGG  | 0  | 13 | RDR2-sensitive |
| GGATGAGAGGAGAGAGTGTGGAGA  | 4  | 24 | RDR2-sensitive |
| GGATGAGAGTCACGTAGGGACGAA  | 0  | 10 | RDR2-sensitive |
| GGATGAGGAGTAGCATGTGAAGTT  | 22 | 0  | RDR2-resistant |

|                           |    |     |                |
|---------------------------|----|-----|----------------|
| GGATGATCCGTCGCATACATGTGT  | 0  | 9   | RDR2-sensitive |
| GGATGCAGACGGATAGTAGGTCAT  | 0  | 10  | RDR2-sensitive |
| GGATGCCAAGACTGCAGAGTGGAA  | 0  | 18  | RDR2-sensitive |
| GGATGCTCTGGATAGTTTGATTGC  | 0  | 95  | RDR2-sensitive |
| GGATGGAATCGCAATCGGACGGTG  | 0  | 50  | RDR2-sensitive |
| GGATGGACCTGGATGTGCGGATGC  | 0  | 9   | RDR2-sensitive |
| GGATGGACGATCACGGTGGAGGAC  | 53 | 0   | RDR2-resistant |
| GGATGGACGGTTGAGATCGTTGGA  | 0  | 10  | RDR2-sensitive |
| GGATGGACTAGCTCGAGCGGTGTC  | 0  | 11  | RDR2-sensitive |
| GGATGGACTGACCGGCCCGTCGGT  | 0  | 17  | RDR2-sensitive |
| GGATGGACTGCGGGATCGGACGGC  | 2  | 19  | RDR2-sensitive |
| GGATGGATATAGAGGACGTTGCTG  | 0  | 23  | RDR2-sensitive |
| GGATGGATGGATGAGGAAGGATGA  | 0  | 10  | RDR2-sensitive |
| GGATGGCGTGGACAGAACCGTGCA  | 0  | 22  | RDR2-sensitive |
| GGATGGCTAGAGGATAGGTGGAAC  | 0  | 16  | RDR2-sensitive |
| GGATGGCTGCAGCGATTGACTGGA  | 1  | 12  | RDR2-sensitive |
| GGATGGCTGTATCCGGACGCACAG  | 0  | 14  | RDR2-sensitive |
| GGATGGGAATGGCAGAACCGGAAT  | 0  | 14  | RDR2-sensitive |
| GGATGGGACGGGACGATCACTCAA  | 1  | 13  | RDR2-sensitive |
| GGATGGTCAGTGA CTATGGGCCGG | 0  | 9   | RDR2-sensitive |
| GGATGGTCGTTGGCAGCCGGTGAT  | 20 | 0   | RDR2-resistant |
| GGATGGTCTGTGGCTCTAGGCCGG  | 3  | 26  | RDR2-sensitive |
| GGATGTAATTCGGCTGCAGGGACC  | 0  | 16  | RDR2-sensitive |
| GGATGTAGATGGACGGTGTAGATT  | 0  | 12  | RDR2-sensitive |
| GGATGTAGTTGGTAGACGGTTCTC  | 0  | 12  | RDR2-sensitive |
| GGATGTCCTGACTGCAGCACCAGC  | 0  | 23  | RDR2-sensitive |
| GGATGTCGACGAGTTGGAGACTTG  | 2  | 14  | RDR2-sensitive |
| GGATGTCGACGAGTTGGAGGCCTC  | 1  | 16  | RDR2-sensitive |
| GGATGTCGACGATGGCAGAACCGT  | 1  | 16  | RDR2-sensitive |
| GGATGTCGGCGTGC GTGTGGAGAC | 0  | 9   | RDR2-sensitive |
| GGATGTCGGGCAGAACACGGTGCA  | 0  | 25  | RDR2-sensitive |
| GGATGTCTGGACCAGGTTCCGACGG | 1  | 34  | RDR2-sensitive |
| GGATGTCTGGCTGGCCATGACGTG  | 0  | 18  | RDR2-sensitive |
| GGATGTTGGGCTTAGAAACCGGCC  | 0  | 14  | RDR2-sensitive |
| GGATGTTGTCCAGCATGTAGACGT  | 0  | 21  | RDR2-sensitive |
| GGATGTTGTTGGACGCGTACCGAA  | 1  | 38  | RDR2-sensitive |
| GGATGTTTGAGACTCAGACGGTCC  | 0  | 13  | RDR2-sensitive |
| GGATGTTTTTTGACTGTATGTCGG  | 1  | 18  | RDR2-sensitive |
| GGATTACGTGCGGAGGAAGATGAA  | 1  | 17  | RDR2-sensitive |
| GGATTAGGATCGTGCCGGCCCGAC  | 0  | 43  | RDR2-sensitive |
| GGATTCCTGGCTGTTGACTGCATG  | 2  | 14  | RDR2-sensitive |
| GGATTCGAGATCGGATACGGATAG  | 0  | 21  | RDR2-sensitive |
| GGATTCGGATCGGATACGCATGGA  | 0  | 10  | RDR2-sensitive |
| GGATTCGGGATCGGATACGGATAG  | 9  | 181 | RDR2-sensitive |
| GGATTCGGGTCCGATACGGAGCGA  | 1  | 18  | RDR2-sensitive |
| GGATTCTTGGCTGTCGACTGCATG  | 1  | 12  | RDR2-sensitive |
| GGATTGAACTGCTCCGGTCGTCCG  | 0  | 11  | RDR2-sensitive |
| GGATTGAATCCTCGGACGACGGAC  | 0  | 9   | RDR2-sensitive |
| GGATTGAGTGGGATTGGATGGGTT  | 19 | 77  | RDR2-sensitive |

|                           |     |    |                |
|---------------------------|-----|----|----------------|
| GGATTGATACGGATTGGAGGGGAT  | 4   | 42 | RDR2-sensitive |
| GGATTGCACTGTCTGGCCTGGGCT  | 0   | 11 | RDR2-sensitive |
| GGATTGCGCGACGGATGACTCCGA  | 1   | 17 | RDR2-sensitive |
| GGATTGGAAGGGATTGGAGAGGAT  | 0   | 12 | RDR2-sensitive |
| GGATTGGGCTGAGCGAGTGGGCAT  | 0   | 13 | RDR2-sensitive |
| GGATTGGTCTTGCGGATCTGGTCCG | 25  | 3  | RDR2-resistant |
| GGATTGGTTCCGGTAGACACGGTCT | 0   | 22 | RDR2-sensitive |
| GGATTGTCCGCACTACAACAGCGT  | 0   | 13 | RDR2-sensitive |
| GGATTGTGATCGTGTCCGCCCGGC  | 0   | 9  | RDR2-sensitive |
| GGATTGTTGTCTGGCTCCGGTGTCT | 23  | 0  | RDR2-resistant |
| GGATTGTTTTAGAGGGTCCGGCAT  | 1   | 17 | RDR2-sensitive |
| GGATTTACTCGCCGGCACAGACAG  | 0   | 9  | RDR2-sensitive |
| GGATTTAGGACGGGTGCACTCCGC  | 0   | 19 | RDR2-sensitive |
| GGATTTAGGGCGGGTGCCTCTGC   | 0   | 13 | RDR2-sensitive |
| GGATTTGAGGGGAAGGGGACGACC  | 24  | 1  | RDR2-resistant |
| GGATTTGATTGTGTGTCGTCGGTT  | 129 | 0  | RDR2-resistant |
| GGATTTGACCAGACATGACGGAC   | 0   | 41 | RDR2-sensitive |
| GGATTTGGACCCTTAACTCGGCGC  | 0   | 10 | RDR2-sensitive |
| GGATTTGGGATCCGATACGGATAG  | 0   | 9  | RDR2-sensitive |
| GGATTTGGTCCGGCACGAACCCAG  | 0   | 24 | RDR2-sensitive |
| GGATTTTATCTGATATGTAGACGA  | 0   | 14 | RDR2-sensitive |
| GGCAAACCCAGCCTGATCGACGAG  | 0   | 9  | RDR2-sensitive |
| GGCAAACGACGAGATCAACGACGC  | 0   | 19 | RDR2-sensitive |
| GGCAAACGACGAGATCGACGACGC  | 1   | 12 | RDR2-sensitive |
| GGCAAACGACGAGATCGATGACGC  | 0   | 21 | RDR2-sensitive |
| GGCAAACGACGCGACGACGAGCTG  | 0   | 19 | RDR2-sensitive |
| GGCAAACGACGTGACGACGAGCTG  | 0   | 9  | RDR2-sensitive |
| GGCAAAGTGTGGCAACTGAGGCAA  | 0   | 10 | RDR2-sensitive |
| GGCAAAGAACGCTCGGCGAACTGT  | 7   | 48 | RDR2-sensitive |
| GGCAAAGAAGGCTCGGCGAACTGT  | 0   | 12 | RDR2-sensitive |
| GGCAAAGACGTTGGCACTTGGCAA  | 0   | 15 | RDR2-sensitive |
| GGCAAAGAGGCTGGCACTCGGCAA  | 0   | 15 | RDR2-sensitive |
| GGCAAAGCCTCGGATTCCGGTAGT  | 0   | 12 | RDR2-sensitive |
| GGCAAAGCGTCCGGCACTCGGCAA  | 0   | 17 | RDR2-sensitive |
| GGCAAATCGTCCGGCACTCGGCAA  | 0   | 9  | RDR2-sensitive |
| GGCAAATGATTGAGGGACAGCTT   | 0   | 24 | RDR2-sensitive |
| GGCAACCCCGGGTGTGCGGTCGGA  | 0   | 12 | RDR2-sensitive |
| GGCAACCCGGACGGATTCACACAT  | 0   | 10 | RDR2-sensitive |
| GGCAACGGATATCTCGGCTCTCGC  | 26  | 3  | RDR2-resistant |
| GGCAAGAACAGTAGTCCCGGACGG  | 0   | 14 | RDR2-sensitive |
| GGCAAGTTCGGATAGGGACGGCTG  | 1   | 50 | RDR2-sensitive |
| GGCAATCGGACGGTCGAGATGGAG  | 0   | 27 | RDR2-sensitive |
| GGCAATCGGGCGGGTAGAACACGG  | 0   | 12 | RDR2-sensitive |
| GGCAATCGGGCGGGTAGAACGCGG  | 0   | 17 | RDR2-sensitive |
| GGCAATCGGGCGGGTAGTACACGG  | 3   | 23 | RDR2-sensitive |
| GGCAATGTGGCTGGCATGACTGAC  | 34  | 0  | RDR2-resistant |
| GGCAATTGTAGGCGTGGCATCCAA  | 0   | 32 | RDR2-sensitive |
| GGCACACAGGACTGTGCAGGCGCA  | 0   | 10 | RDR2-sensitive |
| GGCACACCGGACAGTCTGATGGCA  | 0   | 9  | RDR2-sensitive |

|                           |    |     |                |
|---------------------------|----|-----|----------------|
| GGCACACTCACTCGTCGGCTCAGG  | 0  | 11  | RDR2-sensitive |
| GGCACAGAGTCAGTTATCGTCGTT  | 56 | 1   | RDR2-resistant |
| GGCACAGCAGTCGGAGCAGGGCAG  | 2  | 16  | RDR2-sensitive |
| GGCACAGGACATTGTCTGAACGGCT | 1  | 16  | RDR2-sensitive |
| GGCACAGTAGAATAAGCGGACGGG  | 0  | 9   | RDR2-sensitive |
| GGCACCAACGAGGATTAGTCGGAA  | 2  | 14  | RDR2-sensitive |
| GGCACCAACGAGGATTAGTCGGGA  | 1  | 17  | RDR2-sensitive |
| GGCACCGGACAGTGAACAGTGCAT  | 1  | 30  | RDR2-sensitive |
| GGCACCGGACCTCTAGCATGGCGT  | 0  | 15  | RDR2-sensitive |
| GGCACCGGACTGTCCGATGTGCAC  | 4  | 18  | RDR2-sensitive |
| GGCACCGTTGGATGTGGAGGGTGT  | 0  | 25  | RDR2-sensitive |
| GGCACGAATTGCGGGCTGGATCGT  | 2  | 40  | RDR2-sensitive |
| GGCACGACAGGCTAGGCTCGGCAC  | 0  | 11  | RDR2-sensitive |
| GGCACGACGTGCCTTGGTTCGCGGC | 0  | 9   | RDR2-sensitive |
| GGCACGACTAACAGACTCACGGGC  | 0  | 60  | RDR2-sensitive |
| GGCACGATCTACACTTATCTGTAA  | 14 | 0   | RDR2-resistant |
| GGCACGATCTGTACAATGATGGCG  | 0  | 10  | RDR2-sensitive |
| GGCACGATGGACTGACACGAGCAC  | 0  | 12  | RDR2-sensitive |
| GGCACGATGGGCTGGCACGAGCAC  | 0  | 20  | RDR2-sensitive |
| GGCACGCACGGACAGCAGGGACGC  | 0  | 20  | RDR2-sensitive |
| GGCACGCAGCGACAATTTACTCGT  | 0  | 13  | RDR2-sensitive |
| GGCACGCAGGACTGTGCAGGCACG  | 0  | 31  | RDR2-sensitive |
| GGCACGCAGTGACGGTCTGACTAC  | 1  | 12  | RDR2-sensitive |
| GGCACGCCGCCTGTAGGATGGCCT  | 0  | 10  | RDR2-sensitive |
| GGCACGCGGCGACAATTTACTCGT  | 1  | 38  | RDR2-sensitive |
| GGCACGCGGCGACATTTCACTCGT  | 0  | 12  | RDR2-sensitive |
| GGCACGGACACAGCACCATGACGG  | 0  | 16  | RDR2-sensitive |
| GGCACGGACCCGATGAATGACGGC  | 0  | 11  | RDR2-sensitive |
| GGCACGGAGCTCTGACATGACGAC  | 0  | 23  | RDR2-sensitive |
| GGCACGGATTAGCTAGCGGGTCAT  | 0  | 11  | RDR2-sensitive |
| GGCACGGATTGAAGCAGCCCCGGA  | 0  | 11  | RDR2-sensitive |
| GGCACGGCACGACAGATGACTCGG  | 0  | 14  | RDR2-sensitive |
| GGCACGGCATGAACTCGACACGGC  | 0  | 12  | RDR2-sensitive |
| GGCACGGTAGAATAAACGGGCGGG  | 0  | 22  | RDR2-sensitive |
| GGCACGGTAGAATAAGCGGACGGA  | 0  | 21  | RDR2-sensitive |
| GGCACGGTAGAATAAGCGGGCGGA  | 0  | 29  | RDR2-sensitive |
| GGCACGGTAGAATAAGCGGGCGGG  | 2  | 242 | RDR2-sensitive |
| GGCACGGTAGAATAAGTGGACGGG  | 0  | 27  | RDR2-sensitive |
| GGCACGGTAGAATAAGTGGGCGGG  | 0  | 13  | RDR2-sensitive |
| GGCACGTTACGCGGGCTGGGCCGT  | 0  | 10  | RDR2-sensitive |
| GGCACGTTACGCGGGCTGGGTTCGT | 2  | 25  | RDR2-sensitive |
| GGCACGTTAGACGGGCTGGGTTCGT | 0  | 16  | RDR2-sensitive |
| GGCACTATACTAACCGGGTTCGGAT | 0  | 13  | RDR2-sensitive |
| GGCACTATACTAATCGGACCGGGT  | 0  | 11  | RDR2-sensitive |
| GGCACTCGACAAAGGGACTGGCAA  | 0  | 12  | RDR2-sensitive |
| GGCACTCGACAAATCGTTCGGCAC  | 0  | 10  | RDR2-sensitive |
| GGCACTCGGCAAAGAAGGAAACCT  | 1  | 25  | RDR2-sensitive |
| GGCACTCGGCAAAGAAGGCTTTGC  | 2  | 22  | RDR2-sensitive |
| GGCACTCGGCAAAGAATATGGCAC  | 1  | 39  | RDR2-sensitive |

|                           |    |    |                |
|---------------------------|----|----|----------------|
| GGCACTCGGCAAAGACGACCTCTT  | 0  | 18 | RDR2-sensitive |
| GGCACTCGGCAAAGATACTGGCAA  | 1  | 26 | RDR2-sensitive |
| GGCACTCGGCAAAGGGACTGGCAA  | 0  | 31 | RDR2-sensitive |
| GGCACTGATACGATTGGACACGGC  | 0  | 20 | RDR2-sensitive |
| GGCACTGTAGGTCGGCTTGCCTGC  | 0  | 41 | RDR2-sensitive |
| GGCACTTGTGGCCGACGTTGGGGA  | 34 | 0  | RDR2-resistant |
| GGCAGAACAACAGGGTGTGGACGC  | 0  | 11 | RDR2-sensitive |
| GGCAGAACACGGAACGATAGACTA  | 0  | 14 | RDR2-sensitive |
| GGCAGAACACGGAATGACAGACTA  | 0  | 9  | RDR2-sensitive |
| GGCAGAACAGGTCAAAGGCAGAAC  | 0  | 13 | RDR2-sensitive |
| GGCAGAACGCGGAATGGCCGACTA  | 0  | 12 | RDR2-sensitive |
| GGCAGAACGCGTCAGAGGCAGAAC  | 2  | 46 | RDR2-sensitive |
| GGCAGAACGGCAGAACACACTGAT  | 1  | 98 | RDR2-sensitive |
| GGCAGAACGGCAGAACAGATAGAG  | 0  | 30 | RDR2-sensitive |
| GGCAGAACGGCAGAACAGCAGACT  | 0  | 13 | RDR2-sensitive |
| GGCAGAACGGCAGAACGACAGAAC  | 0  | 9  | RDR2-sensitive |
| GGCAGAACGGCAGAACGCGTCAGA  | 0  | 10 | RDR2-sensitive |
| GGCAGAACGGCAGAACGGCAGAAC  | 0  | 41 | RDR2-sensitive |
| GGCAGAACGGCAGAACTTGTTCAGA | 0  | 9  | RDR2-sensitive |
| GGCAGAACGGCAGACTACTCTTAC  | 2  | 81 | RDR2-sensitive |
| GGCAGAACGGCAGACTACTCTTAG  | 0  | 17 | RDR2-sensitive |
| GGCAGAACGGCAGACTACTCTTAT  | 0  | 9  | RDR2-sensitive |
| GGCAGAACGGGAATGACAGAACAG  | 0  | 17 | RDR2-sensitive |
| GGCAGAACGGGAATGGCAGAACAG  | 0  | 15 | RDR2-sensitive |
| GGCAGAACGTGCGAGTGTGGACGC  | 0  | 78 | RDR2-sensitive |
| GGCAGAAGACAAAGGAACGCACAC  | 0  | 9  | RDR2-sensitive |
| GGCAGACCGTAAGCAGGGACACGC  | 0  | 9  | RDR2-sensitive |
| GGCAGACGACTTAGGTACGCTGAC  | 3  | 18 | RDR2-sensitive |
| GGCAGACGGGGGCTTTGGCAGAAC  | 0  | 10 | RDR2-sensitive |
| GGCAGACTGCGGACGTGACGGCGT  | 0  | 15 | RDR2-sensitive |
| GGCAGACTGGCACTGACACTGGTA  | 1  | 16 | RDR2-sensitive |
| GGCAGACTGGCTTGGGTACATCAA  | 0  | 11 | RDR2-sensitive |
| GGCAGAGACTGCAGTGCCTCTCGT  | 0  | 13 | RDR2-sensitive |
| GGCAGAGCGACTTTAGACGGACAT  | 0  | 19 | RDR2-sensitive |
| GGCAGAGCTCATGATCGTCGAGAC  | 0  | 17 | RDR2-sensitive |
| GGCAGAGCTTATGATCGTCGAGAC  | 0  | 14 | RDR2-sensitive |
| GGCAGATAGACGAAGCCTCTGAAG  | 0  | 10 | RDR2-sensitive |
| GGCAGATAGGTACGTGCACTCTGC  | 2  | 18 | RDR2-sensitive |
| GGCAGATGACTAGCTACCTGACGA  | 0  | 30 | RDR2-sensitive |
| GGCAGATTTGATGTAGAGGGCAGA  | 24 | 2  | RDR2-resistant |
| GGCAGCACTTGACCGTCGGACATA  | 0  | 9  | RDR2-sensitive |
| GGCAGCGCGACTGGAGGAGCGCAT  | 1  | 13 | RDR2-sensitive |
| GGCAGCGTCTGTCTCTGGCGGCTC  | 0  | 17 | RDR2-sensitive |
| GGCAGCTGACGGTCTTGACCTGAA  | 2  | 14 | RDR2-sensitive |
| GGCAGCTGTAGCCCAAGTAGCATA  | 15 | 0  | RDR2-resistant |
| GGCAGCTGTTGGATTGCGATCGGA  | 0  | 11 | RDR2-sensitive |
| GGCAGGAACAGTAGACCAAGGCAG  | 1  | 20 | RDR2-sensitive |
| GGCAGGAACTGCATTACTTGCAAG  | 83 | 3  | RDR2-resistant |
| GGCAGGACGGGACGACGTGGACAG  | 0  | 18 | RDR2-sensitive |

|                            |    |    |                |
|----------------------------|----|----|----------------|
| GGCAGGCTGTGGCACCTTCGGCAC   | 0  | 83 | RDR2-sensitive |
| GGCAGGGACTTTTCATTCTGCTGG   | 40 | 0  | RDR2-resistant |
| GGCAGGGCAGAGAAGCGACGACAT   | 2  | 17 | RDR2-sensitive |
| GGCAGGGCGTAGCATATGACTGAT   | 0  | 13 | RDR2-sensitive |
| GGCAGGTCGGCACTCGGCAGTGAT   | 1  | 12 | RDR2-sensitive |
| GGCAGGTGACTGAGGGGGTGGCAA   | 0  | 9  | RDR2-sensitive |
| GGCAGTCCGCAGCAGCTTTTGGTG   | 0  | 13 | RDR2-sensitive |
| GGCAGTCGCGTAGACGCTCCCCAA   | 0  | 10 | RDR2-sensitive |
| GGCAGTCTGCAGCAGCTTTTGGTG   | 1  | 15 | RDR2-sensitive |
| GGCAGTGACGATGACAGTGAACGG   | 0  | 14 | RDR2-sensitive |
| GGCAGTGC GGATAACGTAAGGGCAT | 0  | 10 | RDR2-sensitive |
| GGCAGTGGACCCGTGACTCGGCAC   | 0  | 11 | RDR2-sensitive |
| GGCAGTGGGCCTGTGATCCGGCAC   | 0  | 11 | RDR2-sensitive |
| GGCAGTGGGCTTGTGATTCGGCAC   | 0  | 21 | RDR2-sensitive |
| GGCAGTGTAGGACGGAGTTGAGGC   | 0  | 12 | RDR2-sensitive |
| GGCATAACATAGAGCACAAGGACGT  | 0  | 9  | RDR2-sensitive |
| GGCATAGGGCTCGACGGTCTGTAA   | 0  | 10 | RDR2-sensitive |
| GGCATATGACGACAGTAGACACAC   | 0  | 26 | RDR2-sensitive |
| GGCATCGTGACGCATCATCTGGTA   | 0  | 10 | RDR2-sensitive |
| GGCATGACACGACTGGAGCTAGGC   | 0  | 13 | RDR2-sensitive |
| GGCATGACTGGCACTGTACCCAAG   | 24 | 1  | RDR2-resistant |
| GGCATGACTGTTGAGGCGGGGGCA   | 0  | 11 | RDR2-sensitive |
| GGCATGATCCTGACGGAAGACGAC   | 0  | 9  | RDR2-sensitive |
| GGCATGCTGTAACGAAACCGGTC    | 0  | 9  | RDR2-sensitive |
| GGCATGGACACAAGCTGACGACGA   | 0  | 67 | RDR2-sensitive |
| GGCATGGATAACAAGCTGACGACGA  | 0  | 16 | RDR2-sensitive |
| GGCATGGTTTTGTCGGTCATAAGAA  | 24 | 0  | RDR2-resistant |
| GGCATGTATGGACAGGCTAGACGC   | 0  | 18 | RDR2-sensitive |
| GGCATGTGGATCGATCGGGCATGA   | 0  | 11 | RDR2-sensitive |
| GGCATTAGAACACGGGCTGAAGAC   | 0  | 10 | RDR2-sensitive |
| GGCATTGCTGGGCTGTTGTGGGC    | 66 | 0  | RDR2-resistant |
| GGCCAACCTCGGACGGGAGACGCA   | 0  | 11 | RDR2-sensitive |
| GGCCAACCTGAAGGAGAACGAGCAA  | 0  | 10 | RDR2-sensitive |
| GGCCACCTAGGGAACCGTCCGACA   | 0  | 13 | RDR2-sensitive |
| GGCCACTCGGAAACATTCTGCGGC   | 2  | 14 | RDR2-sensitive |
| GGCCAGGACTGGAGTTCGTCCGCA   | 0  | 9  | RDR2-sensitive |
| GGCCAGGAGGAGGTAGCGCGGGAC   | 25 | 1  | RDR2-resistant |
| GGCCAGGGACGGGGTAGAGGGCAG   | 44 | 0  | RDR2-resistant |
| GGCCAGGTTCCGGTACGAGAGTCGT  | 0  | 22 | RDR2-sensitive |
| GGCCAGTCTGACAGAAGGACAGCG   | 5  | 34 | RDR2-sensitive |
| GGCCATGAGTTGGAGACGGAACAA   | 0  | 11 | RDR2-sensitive |
| GGCCCAATTGTAGTCGGACGGCGA   | 1  | 33 | RDR2-sensitive |
| GGCCCACAGGCGCGGACTGTCCGG   | 2  | 66 | RDR2-sensitive |
| GGCCCAGGATGATGAGATAGACGT   | 0  | 13 | RDR2-sensitive |
| GGCCCAGTTGGTCTCTATCGTTGG   | 2  | 15 | RDR2-sensitive |
| GGCCCATAGGCGCGGACTGTCCGG   | 0  | 15 | RDR2-sensitive |
| GGCCCATGTAACGCACGTTCCGGAC  | 0  | 13 | RDR2-sensitive |
| GGCCCGAACCAACAGTAGAACGGT   | 1  | 64 | RDR2-sensitive |
| GGCCCGACGGTCTGAAAATTGGAG   | 0  | 10 | RDR2-sensitive |



|                           |    |    |                |
|---------------------------|----|----|----------------|
| GGCCCGAGACCGCATAGAACCGGA  | 0  | 13 | RDR2-sensitive |
| GGCCCGCAGCTGGTCTAAACGGAC  | 0  | 20 | RDR2-sensitive |
| GGCCCGCGACAGTAGATCGGACGG  | 0  | 25 | RDR2-sensitive |
| GGCCCGGACCAAGCTGAAGAACAG  | 0  | 28 | RDR2-sensitive |
| GGCCCGGACTGCGTGCTGCATGGC  | 0  | 17 | RDR2-sensitive |
| GGCCCGGCCTGTCAGATACGGTTA  | 0  | 9  | RDR2-sensitive |
| GGCCCGTGGGCCGTCGGACGACAG  | 37 | 1  | RDR2-resistant |
| GGCCCGTTGGACCCCTATCACGGC  | 1  | 16 | RDR2-sensitive |
| GGCCCTATGCGTGGATCGTCCGGC  | 0  | 9  | RDR2-sensitive |
| GGCCCTGTGTTGCGGATCGTTCGT  | 0  | 24 | RDR2-sensitive |
| GGCCGAAGCCGGCTTCCTCTGGAC  | 0  | 9  | RDR2-sensitive |
| GGCCGAATTGGTTCTGTTGGGCTG  | 0  | 15 | RDR2-sensitive |
| GGCCGACACGTAGAGGGCGCTGTA  | 0  | 15 | RDR2-sensitive |
| GGCCGACCGTTGGACAGGCGCGCG  | 0  | 10 | RDR2-sensitive |
| GGCCGACCGTTGGCTCACCGGACA  | 19 | 73 | RDR2-sensitive |
| GGCCGACCTGGACTGAGCCCGGCT  | 0  | 10 | RDR2-sensitive |
| GGCCGAGACGAACTTCAGAAGCGA  | 1  | 21 | RDR2-sensitive |
| GGCCGCAATTTGAGCATCGTTGGA  | 27 | 3  | RDR2-resistant |
| GGCCGCACTGTGGGATGACGTCGT  | 0  | 10 | RDR2-sensitive |
| GGCCGCCAAGGCCATCGATCGGCA  | 18 | 0  | RDR2-resistant |
| GGCCGCCTAGGGAAGTGTCCGACA  | 0  | 10 | RDR2-sensitive |
| GGCCGCTCGGATCTACAAAGGCAT  | 0  | 16 | RDR2-sensitive |
| GGCCGGTCTGGACCAGTTGAACGG  | 0  | 21 | RDR2-sensitive |
| GGCCGTTGGATGGAAAATGGACGG  | 0  | 33 | RDR2-sensitive |
| GGCCTAAAGCACGGACTGTTCCGGT | 0  | 16 | RDR2-sensitive |
| GGCCTACAGGCGCGGACTGTCCGG  | 0  | 9  | RDR2-sensitive |
| GGCCTAGACTTGTGAGAGGACTGA  | 0  | 9  | RDR2-sensitive |
| GGCCTAGAGTCGGACGATCCACGA  | 0  | 13 | RDR2-sensitive |
| GGCCTAGGACCGCATAGAACCGGA  | 0  | 14 | RDR2-sensitive |
| GGCCTATTCAGACGGACACCTCAC  | 0  | 9  | RDR2-sensitive |
| GGCCTATTTCTGTAGTCTATCGGT  | 28 | 0  | RDR2-resistant |
| GGCCTCCGGACGCGATGAGGACGT  | 0  | 15 | RDR2-sensitive |
| GGCCTCGGATTTTACTGGCACGGC  | 0  | 20 | RDR2-sensitive |
| GGCCTCGGGCGAGACGGAAATCCT  | 0  | 21 | RDR2-sensitive |
| GGCCTCGGGCGAGACGGAGATCCT  | 0  | 13 | RDR2-sensitive |
| GGCCTCGTACAGAGCCGTCGGAGA  | 1  | 14 | RDR2-sensitive |
| GGCCTCGTACAGATCCGTCGGAGA  | 0  | 11 | RDR2-sensitive |
| GGCCTGCATCTGGTCGGACGGTCC  | 0  | 9  | RDR2-sensitive |
| GGCCTGCCGGGACTGAGGAGATGC  | 2  | 26 | RDR2-sensitive |
| GGCCTGGGTGGGACGGTTGGCTCG  | 1  | 12 | RDR2-sensitive |
| GGCCTGGTTGTGGACTGAGGGCAT  | 2  | 21 | RDR2-sensitive |
| GGCCTTAACGGGCTGTGGGCCGGC  | 3  | 28 | RDR2-sensitive |
| GGCCTTAGTTGACGGTAGGATCGA  | 0  | 50 | RDR2-sensitive |
| GGCCTTGGGACTGAACGAGGACGC  | 4  | 81 | RDR2-sensitive |
| GGCGAACAATGACACTCGGCACAG  | 0  | 10 | RDR2-sensitive |
| GGCGAACC GCGGAACAGGATTCGG | 0  | 47 | RDR2-sensitive |
| GGCGAACCTGGATCGAGCGGACGC  | 0  | 13 | RDR2-sensitive |
| GGCGAACTGAAGATTGGGAGCGAC  | 0  | 11 | RDR2-sensitive |
| GGCGAACTGTACATCGACAACGGC  | 0  | 12 | RDR2-sensitive |

|                           |    |    |                |
|---------------------------|----|----|----------------|
| GGCGAACTGTACATCGGCAACAGC  | 6  | 73 | RDR2-sensitive |
| GGCGAACTGTACATCGGCAACGGC  | 0  | 11 | RDR2-sensitive |
| GGCGAAGCCGCGACATAGAGCAAT  | 21 | 2  | RDR2-resistant |
| GGCGAATCTGGTAGTAGACAGCGG  | 0  | 9  | RDR2-sensitive |
| GGCGACACGGATGGTACGCGGCTC  | 0  | 9  | RDR2-sensitive |
| GGCGACATAACAACACTGACGGCGA | 0  | 10 | RDR2-sensitive |
| GGCGACATGATGGAGCAGAGCGTG  | 0  | 14 | RDR2-sensitive |
| GGCGACATCACTCGTCGGCTCAG   | 0  | 30 | RDR2-sensitive |
| GGCGACCGACGAACCGCAAGGACG  | 0  | 9  | RDR2-sensitive |
| GGCGACCGAGAACGACATAGACGC  | 0  | 15 | RDR2-sensitive |
| GGCGACCGAGCTCTGGCCACAGAA  | 0  | 9  | RDR2-sensitive |
| GGCGACCGTAGAAAGTTAGCGGCT  | 0  | 23 | RDR2-sensitive |
| GGCGACCTTGCGGAGCGACTGGCT  | 2  | 36 | RDR2-sensitive |
| GGCGACGAATGGAAGGACACGGAC  | 0  | 10 | RDR2-sensitive |
| GGCGACGACAGTAGAGGAAGACGC  | 0  | 11 | RDR2-sensitive |
| GGCGACGACGGACCGTGGCTACGA  | 0  | 22 | RDR2-sensitive |
| GGCGACGAGGAAGAAGAAGGACAC  | 0  | 18 | RDR2-sensitive |
| GGCGACGAGTAAGTAGAAGGACAC  | 0  | 34 | RDR2-sensitive |
| GGCGACGATGGGAACAGGGACCGC  | 0  | 12 | RDR2-sensitive |
| GGCGACGCGGAGAAACTTCGGCAC  | 0  | 13 | RDR2-sensitive |
| GGCGACGCGGCCTCGTAGCTCGGC  | 1  | 22 | RDR2-sensitive |
| GGCGACGCTGGACGCGGGAGCTGA  | 0  | 11 | RDR2-sensitive |
| GGCGACGGATACGGAAGAGGACAG  | 0  | 10 | RDR2-sensitive |
| GGCGACGGTAGACGGCAGAACCAA  | 0  | 34 | RDR2-sensitive |
| GGCGACGTACGGCTATAATTCACC  | 6  | 26 | RDR2-sensitive |
| GGCGACGTAGACCAAGAGGGCTTC  | 6  | 70 | RDR2-sensitive |
| GGCGACGTAGATCAAGAGGGCTTC  | 9  | 46 | RDR2-sensitive |
| GGCGACGTGGACGAGTCGGACGCT  | 0  | 9  | RDR2-sensitive |
| GGCGACGTTTGAGCAAGAGGACAC  | 0  | 16 | RDR2-sensitive |
| GGCGACTGCACGGCACTGCTCGAC  | 4  | 30 | RDR2-sensitive |
| GGCGACTGGTAAAGGAGACGACGC  | 0  | 13 | RDR2-sensitive |
| GGCGACTGTGCGGTCTGCGGCGTC  | 0  | 9  | RDR2-sensitive |
| GGCGAGAACTGCTGCCTGGGCGGT  | 24 | 2  | RDR2-resistant |
| GGCGAGACCGTACCCATAATGCAA  | 0  | 11 | RDR2-sensitive |
| GGCGAGACGAGCAGAGAACAGTGA  | 0  | 11 | RDR2-sensitive |
| GGCGAGACGGTAACATCACGACGA  | 0  | 14 | RDR2-sensitive |
| GGCGAGACGTGAATCCTCCGGGGT  | 0  | 9  | RDR2-sensitive |
| GGCGAGAGCGGGACTGGAGGCGGG  | 0  | 11 | RDR2-sensitive |
| GGCGAGAGTGGAGACGAGAGCTGA  | 0  | 10 | RDR2-sensitive |
| GGCGAGAGTGGAGGCGAGAGCTGA  | 0  | 13 | RDR2-sensitive |
| GGCGAGATGGCGAACGACGATCGC  | 0  | 12 | RDR2-sensitive |
| GGCGAGATGGCGAACGACGATCGT  | 0  | 15 | RDR2-sensitive |
| GGCGAGATGGCGAACGACGATTAC  | 0  | 11 | RDR2-sensitive |
| GGCGAGCAACAGGTAGGACGACAC  | 1  | 24 | RDR2-sensitive |
| GGCGAGCAGGAACTAAACGGACAT  | 0  | 23 | RDR2-sensitive |
| GGCGAGCATGCAGAACCGTGCTGA  | 0  | 17 | RDR2-sensitive |
| GGCGAGCGGCAGAGCAACGACGAA  | 0  | 13 | RDR2-sensitive |
| GGCGAGGACGAGTAGGGATGGCAA  | 0  | 9  | RDR2-sensitive |
| GGCGAGGATCATGGTCGAGGACGA  | 0  | 9  | RDR2-sensitive |

|                           |    |    |                |
|---------------------------|----|----|----------------|
| GGCGAGGGCTGACACGGCGCTCAC  | 0  | 14 | RDR2-sensitive |
| GGCGAGTGTAGAGAAGGACGGTAC  | 0  | 13 | RDR2-sensitive |
| GGCGATAACGGCGAGCTAGAGCAT  | 0  | 9  | RDR2-sensitive |
| GGCGATAACGGCGAGCTGGAGCGT  | 1  | 15 | RDR2-sensitive |
| GGCGATCCAAGTCGGAGACAGCTC  | 0  | 10 | RDR2-sensitive |
| GGCGATCCACGACCTAGAACCGGA  | 0  | 10 | RDR2-sensitive |
| GGCGATCCGACATGGGCTAGACGC  | 0  | 14 | RDR2-sensitive |
| GGCGATCGAGTCGAAC TAGTACGG | 2  | 47 | RDR2-sensitive |
| GGCGATGGAAGTGTGGGACGCGGT  | 0  | 19 | RDR2-sensitive |
| GGCGATGGTGGGCTTTAGACGGAC  | 0  | 24 | RDR2-sensitive |
| GGCGATGTAGTTCTCCGGCGGCGT  | 2  | 20 | RDR2-sensitive |
| GGCGCAATCTGTACAATCGTCGTG  | 0  | 10 | RDR2-sensitive |
| GGCGCAATCTGTACAGTCGTCCGG  | 5  | 26 | RDR2-sensitive |
| GGCGCACCGGAATCGATCGAGACA  | 17 | 0  | RDR2-resistant |
| GGCGCACTGTAGGGATAGAAGATG  | 0  | 22 | RDR2-sensitive |
| GGCGCAGAAGCGGATTCTTCTCTG  | 0  | 9  | RDR2-sensitive |
| GGCGCAGACTGTCCGGACCGCGGA  | 0  | 10 | RDR2-sensitive |
| GGCGCATGTTTCGTTCTGTCTGGAC | 2  | 14 | RDR2-sensitive |
| GGCGCATTGGCGGAATGTGGCGGC  | 0  | 9  | RDR2-sensitive |
| GGCGCCGAGCTCTGACGTGGCGAC  | 0  | 11 | RDR2-sensitive |
| GGCGCGAACACCAGTCGGAGACGT  | 0  | 12 | RDR2-sensitive |
| GGCGCGACGGAACCGAACAGGCGT  | 1  | 14 | RDR2-sensitive |
| GGCGCGACGTGACGACTTAGGCAT  | 0  | 42 | RDR2-sensitive |
| GGCGCGACTCGCGAGCGAGGATGG  | 0  | 12 | RDR2-sensitive |
| GGCGCGACTGCAAGAGCCACGGCT  | 0  | 12 | RDR2-sensitive |
| GGCGCGATATGGCAGAACCGTGCG  | 0  | 10 | RDR2-sensitive |
| GGCGCGCGGATTGATCGGGCGGGG  | 0  | 11 | RDR2-sensitive |
| GGCGCGGCGTGGGAACAACGGCGA  | 0  | 15 | RDR2-sensitive |
| GGCGCGTTGACGGCAGAACCGTGC  | 0  | 11 | RDR2-sensitive |
| GGCGCGTTGAGGACGTGTCTGAAC  | 0  | 52 | RDR2-sensitive |
| GGCGCGTTTGGCTGGTCTGTTGGA  | 0  | 17 | RDR2-sensitive |
| GGCGCTCGATCGGAGGAAGGCTAC  | 0  | 9  | RDR2-sensitive |
| GGCGCTCGGCACGGGCTAGACGCA  | 0  | 9  | RDR2-sensitive |
| GGCGCTCGGTCCGGCTGAAGGCGTT | 0  | 10 | RDR2-sensitive |
| GGCGCTCGTTACTGTACTTGGCAT  | 0  | 9  | RDR2-sensitive |
| GGCGCTCTGGCTGGCTCGACTGCT  | 64 | 11 | RDR2-resistant |
| GGCGCTGTTTTCTGTCCAGGTCGG  | 0  | 9  | RDR2-sensitive |
| GGCGGAAACAGTAGTCCC GGACGG | 0  | 10 | RDR2-sensitive |
| GGCGGAAACAATCGCAGAACGAGGA | 0  | 19 | RDR2-sensitive |
| GGCGGAACGACGGACCAGATCCCT  | 0  | 10 | RDR2-sensitive |
| GGCGGAAGAAGGCGAACTCGGCTC  | 0  | 9  | RDR2-sensitive |
| GGCGGACAGAGTAGAAGAGAGGAC  | 0  | 23 | RDR2-sensitive |
| GGCGGACCATTCACGCGCATGTCTG | 1  | 16 | RDR2-sensitive |
| GGCGGACGCGACAGATCAATGCTG  | 1  | 22 | RDR2-sensitive |
| GGCGGAGATACTCGGCAGAACCGT  | 0  | 18 | RDR2-sensitive |
| GGCGGAGCCTGACAGAGGGACAGC  | 15 | 0  | RDR2-resistant |
| GGCGGAGCTCGGCGTAAAGATCTG  | 0  | 9  | RDR2-sensitive |
| GGCGGAGTCTGATAGGAGGGTCTGA | 0  | 41 | RDR2-sensitive |
| GGCGGATCAGTAGAGGATGTCAGA  | 0  | 9  | RDR2-sensitive |

|                           |    |    |                |
|---------------------------|----|----|----------------|
| GGCGGATCTGACGGTGTGCCTCAC  | 0  | 23 | RDR2-sensitive |
| GGCGGATTCCTGTGGCGCGACGGC  | 1  | 13 | RDR2-sensitive |
| GGCGGATTGCGCGAGACAGTGTA   | 0  | 15 | RDR2-sensitive |
| GGCGGCAGCAAGGACGGTGACGGC  | 15 | 0  | RDR2-resistant |
| GGCGGCAGGATAGAAACGCGCGGT  | 0  | 13 | RDR2-sensitive |
| GGCGGCAGGGACAGGCTGATGCTC  | 0  | 14 | RDR2-sensitive |
| GGCGGCATGCAGGACAGACGACGC  | 0  | 27 | RDR2-sensitive |
| GGCGGCATGCAGGACAGACGGCGC  | 2  | 62 | RDR2-sensitive |
| GGCGGCGTGTGGAAAGGGACTGGC  | 0  | 9  | RDR2-sensitive |
| GGCGGCTGAGATGAACGCGCGGCT  | 0  | 12 | RDR2-sensitive |
| GGCGGGAGCTGAGAGATGACGCGA  | 0  | 13 | RDR2-sensitive |
| GGCGGGCCTAGAATACAGACAGGG  | 0  | 27 | RDR2-sensitive |
| GGCGGGCCTGGAGAAGAATAGGGT  | 1  | 16 | RDR2-sensitive |
| GGCGGGCGCGGCAGAACGTGCGAG  | 0  | 9  | RDR2-sensitive |
| GGCGGGTTCGCTAGATCCATCGGC  | 0  | 9  | RDR2-sensitive |
| GGCGGTACGGTATGAGACGAGCTA  | 0  | 21 | RDR2-sensitive |
| GGCGTACACTGTTAATGGAGTCTT  | 0  | 9  | RDR2-sensitive |
| GGCGTAGACGAGGATGACGATCGA  | 1  | 12 | RDR2-sensitive |
| GGCGTAGCGGGCCCGCAGAACCGG  | 0  | 10 | RDR2-sensitive |
| GGCGTAGGGTGTAGGTGGACGTGC  | 0  | 11 | RDR2-sensitive |
| GGCGTAGTAGCTGGTTGCACGGAC  | 0  | 17 | RDR2-sensitive |
| GGCGTCGCTGTGCGTTACCTCGGC  | 0  | 16 | RDR2-sensitive |
| GGCGTCTCGAGACATACTGACGGA  | 0  | 34 | RDR2-sensitive |
| GGCGTCTGTACACGGGAACGGTAA  | 29 | 0  | RDR2-resistant |
| GGCGTGAATTCTGTGGACGCGGAC  | 0  | 13 | RDR2-sensitive |
| GGCGTGACTCGGCAAGAGCTGGCC  | 1  | 37 | RDR2-sensitive |
| GGCGTGACTCGGCGAGAGCTGGCC  | 6  | 63 | RDR2-sensitive |
| GGCGTGCCGGGCTACTTGGGCCGT  | 0  | 14 | RDR2-sensitive |
| GGCGTGCGCTGTTAGGAGCCGGCG  | 0  | 10 | RDR2-sensitive |
| GGCGTGCGTCAGGATAAAGGTGTC  | 0  | 9  | RDR2-sensitive |
| GGCGTGGACTGTCCGGACCGCGGA  | 0  | 14 | RDR2-sensitive |
| GGCGTGTAGAGGACGTGTCTGAAC  | 0  | 16 | RDR2-sensitive |
| GGCGTGTATAGCTGTTCTGTTGGA  | 0  | 13 | RDR2-sensitive |
| GGCGTGTCGGGCTGCACGACGGGT  | 0  | 9  | RDR2-sensitive |
| GGCGTGTCTCTGGCGGAAGAGCTC  | 1  | 25 | RDR2-sensitive |
| GGCGTTCGGTAGAGCGGGGCGAGT  | 0  | 18 | RDR2-sensitive |
| GGCGTTGTCGGCAGCATAGGCATG  | 0  | 19 | RDR2-sensitive |
| GGCGTTTCGCGCGGGCGTTCCGTA  | 0  | 15 | RDR2-sensitive |
| GGCGTTTCTTAGAACAGTCGGTGC  | 2  | 15 | RDR2-sensitive |
| GGCGTTTCTTCGGTTCGAGGACGG  | 0  | 9  | RDR2-sensitive |
| GGCGTTTTAAGTCGGACGGTCCGC  | 0  | 11 | RDR2-sensitive |
| GGCTAACCGGACCGCCTGTACTGA  | 0  | 11 | RDR2-sensitive |
| GGCTAATGGACTGTATCGGGGCGAG | 0  | 18 | RDR2-sensitive |
| GGCTACACGACGGCTCGGAACCAA  | 0  | 9  | RDR2-sensitive |
| GGCTACCCTGACAGCCGTCCGACA  | 0  | 9  | RDR2-sensitive |
| GGCTACCGTCGGAACAGTCCGAAA  | 0  | 16 | RDR2-sensitive |
| GGCTACCGTCGGAACAGTCCGAGA  | 2  | 26 | RDR2-sensitive |
| GGCTACGGGTGGTAGAACGCGGCA  | 0  | 13 | RDR2-sensitive |
| GGCTACGTAGATCAAGAGGGCTTC  | 1  | 13 | RDR2-sensitive |

|                            |     |     |                |
|----------------------------|-----|-----|----------------|
| GGCTACTCTGTTGGATGGAAGATG   | 1   | 41  | RDR2-sensitive |
| GGCTACTGTAGTTCACGGGCCGGC   | 1   | 32  | RDR2-sensitive |
| GGCTAGAACTGATCCGGCTCTGGA   | 0   | 23  | RDR2-sensitive |
| GGCTAGAAGATGGCACCGGACTGT   | 0   | 14  | RDR2-sensitive |
| GGCTAGACACAGTAGAAGATCCGT   | 0   | 30  | RDR2-sensitive |
| GGCTAGACTGGAGACGACAACAGA   | 0   | 12  | RDR2-sensitive |
| GGCTAGACTGGAGGCGACGACGGA   | 1   | 46  | RDR2-sensitive |
| GGCTAGACTGGAGGCGACGACGGT   | 1   | 40  | RDR2-sensitive |
| GGCTAGAGCGTTGGTTGAAGGCAT   | 0   | 14  | RDR2-sensitive |
| GGCTAGGAACAACAACGACGGTAT   | 0   | 11  | RDR2-sensitive |
| GGCTAGGGCTTCTCTGCCTGACGG   | 3   | 32  | RDR2-sensitive |
| GGCTAGGGTTTAGAATGAGGGCGG   | 0   | 10  | RDR2-sensitive |
| GGCTAGGTTGTTGGCTCGGCGAA    | 4   | 24  | RDR2-sensitive |
| GGCTATATTCGTCGGTAAACCCAC   | 0   | 37  | RDR2-sensitive |
| GGCTATATTCGTCGGTACACCCAC   | 0   | 17  | RDR2-sensitive |
| GGCTATCTTTGCTCTATTTGTCTCGG | 1   | 50  | RDR2-sensitive |
| GGCTATTGACGTCGACTTTATGGA   | 72  | 3   | RDR2-resistant |
| GGCTATTTTCGTCGGCCGGCCAC    | 3   | 25  | RDR2-sensitive |
| GGCTCAATTGTAGTCGGACGGTGA   | 0   | 15  | RDR2-sensitive |
| GGCTCAATTGTAGTTGGACGGCGA   | 0   | 9   | RDR2-sensitive |
| GGCTCAGATCGGACTGGTCCGGCC   | 0   | 20  | RDR2-sensitive |
| GGCTCAGGATCTAGAAAGTGACGG   | 3   | 20  | RDR2-sensitive |
| GGCTCCACGGCTGTGCGTCTGGCA   | 0   | 11  | RDR2-sensitive |
| GGCTCCATAGGATCTGAAGCGGTA   | 0   | 10  | RDR2-sensitive |
| GGCTCCCGGACTGGACCAGGCAAC   | 0   | 103 | RDR2-sensitive |
| GGCTCCTCGGACGACGGCTGTGCT   | 0   | 9   | RDR2-sensitive |
| GGCTCGCGAGGCATACCCTGATAT   | 0   | 9   | RDR2-sensitive |
| GGCTCGGATAAGGTAGAGGGACGT   | 0   | 13  | RDR2-sensitive |
| GGCTCGGATAGGAACTAAGCACGG   | 0   | 15  | RDR2-sensitive |
| GGCTCGGATGACGTGTTTCACTAG   | 0   | 12  | RDR2-sensitive |
| GGCTCGGCTCGGACTCGTTCTGAA   | 0   | 11  | RDR2-sensitive |
| GGCTCGGCTCGGCTCGGAGCGGCT   | 0   | 10  | RDR2-sensitive |
| GGCTCGGGGTAGAGTGATGATGGC   | 0   | 9   | RDR2-sensitive |
| GGCTCGTGGCTCGTGGTAGATCGG   | 0   | 10  | RDR2-sensitive |
| GGCTCGTGGGCTACAGTAGCCGGT   | 0   | 10  | RDR2-sensitive |
| GGCTCGTTGGATCACCGAAGCGCA   | 0   | 13  | RDR2-sensitive |
| GGCTCTACGTTGTACATGTACTAA   | 21  | 1   | RDR2-resistant |
| GGCTCTATCGTCTTTTCGTCTGTC   | 0   | 15  | RDR2-sensitive |
| GGCTCTCCGGACTGGACCAGGCAA   | 0   | 27  | RDR2-sensitive |
| GGCTCTCGGCAAAGACTGACGACC   | 1   | 20  | RDR2-sensitive |
| GGCTCTCGGCAAAGACTGACGGAC   | 0   | 14  | RDR2-sensitive |
| GGCTCTCGGCAAAGACTGACGGCC   | 2   | 17  | RDR2-sensitive |
| GGCTCTCGGCAAAGACTGACGGTC   | 8   | 34  | RDR2-sensitive |
| GGCTCTCGGGAGATGGAGGACAGT   | 180 | 10  | RDR2-resistant |
| GGCTCTCGGTAAAGTTCGGCTTTGC  | 0   | 11  | RDR2-sensitive |
| GGCTCTGGACTGCAGACAGGCGAC   | 1   | 19  | RDR2-sensitive |
| GGCTCTGTGCGACTGAAGGGCGCGC  | 5   | 26  | RDR2-sensitive |
| GGCTCTGTGCGACTGGAGGACGTGC  | 1   | 13  | RDR2-sensitive |
| GGCTCTGTGCGACTGGAGGGCGCGC  | 0   | 9   | RDR2-sensitive |

|                           |    |    |                |
|---------------------------|----|----|----------------|
| GGCTCTGTCTGACTGGAGGGCGTGC | 0  | 29 | RDR2-sensitive |
| GGCTCTTGATCGCAAAGGACACAC  | 0  | 9  | RDR2-sensitive |
| GGCTCTTGCAAGCATTAGATCGTT  | 1  | 23 | RDR2-sensitive |
| GGCTCTTGCAAGCATTAGGTCGTT  | 6  | 51 | RDR2-sensitive |
| GGCTCTTTGAGTTGGATCTGTTGG  | 0  | 18 | RDR2-sensitive |
| GGCTCTTTGGACCGGTAGAAACGA  | 0  | 10 | RDR2-sensitive |
| GGCTGAAAAGCTGAGCGTTTGGCA  | 3  | 37 | RDR2-sensitive |
| GGCTGAAAAGCTGATTGTTTGGCA  | 0  | 11 | RDR2-sensitive |
| GGCTGAACTGTGCTGAAGAGCTGC  | 0  | 10 | RDR2-sensitive |
| GGCTGACAGGACTGTCCGGTGTGC  | 0  | 9  | RDR2-sensitive |
| GGCTGACATCTAGGACCACGACGG  | 1  | 53 | RDR2-sensitive |
| GGCTGACCTGAACCGACCTGACGC  | 0  | 18 | RDR2-sensitive |
| GGCTGACCTGATAGGCTGATACGG  | 0  | 37 | RDR2-sensitive |
| GGCTGACGGCGAGTGGACGGACGA  | 0  | 13 | RDR2-sensitive |
| GGCTGAGAAGGAGGCTGTAGCGGC  | 1  | 16 | RDR2-sensitive |
| GGCTGAGATCGCAGAACGGCAGAA  | 0  | 13 | RDR2-sensitive |
| GGCTGAGATCGCAGAATGGCAGAA  | 1  | 34 | RDR2-sensitive |
| GGCTGAGATCGTAGAATGGCAGAA  | 0  | 12 | RDR2-sensitive |
| GGCTGAGATTGTAGAACGGTAGAA  | 1  | 29 | RDR2-sensitive |
| GGCTGAGCGTTGGTCAAATGCATG  | 26 | 1  | RDR2-resistant |
| GGCTGAGTCAGACGTGTGGTAGAA  | 0  | 21 | RDR2-sensitive |
| GGCTGATCAGAGGATGGCGGAGAT  | 0  | 29 | RDR2-sensitive |
| GGCTGATCGATGAAGACGTGCGCT  | 0  | 11 | RDR2-sensitive |
| GGCTGATGAAGGCGCTGTGGAGAA  | 1  | 32 | RDR2-sensitive |
| GGCTGCATGAGCTAGATCGGCCGA  | 0  | 9  | RDR2-sensitive |
| GGCTGCATGAGTCAGGTCGGCGGG  | 0  | 29 | RDR2-sensitive |
| GGCTGCCACGTCAGCATAGTCGGC  | 0  | 13 | RDR2-sensitive |
| GGCTGCCTAGGAGACCGTCCGACA  | 0  | 11 | RDR2-sensitive |
| GGCTGCGGACACCGTTGAAGACAG  | 0  | 21 | RDR2-sensitive |
| GGCTGCGGACTGCGGTGCGGCTCC  | 0  | 37 | RDR2-sensitive |
| GGCTGCGGCATGTGGATCGATCGG  | 0  | 23 | RDR2-sensitive |
| GGCTGGAACCTGGAAGCGGAGCTC  | 0  | 9  | RDR2-sensitive |
| GGCTGGACAGTAGCACAAGCGCAC  | 0  | 13 | RDR2-sensitive |
| GGCTGGACATCGGAACACAGACGG  | 0  | 11 | RDR2-sensitive |
| GGCTGGACCCGGCACGACTTTGGC  | 0  | 60 | RDR2-sensitive |
| GGCTGGACCCGGCACGACTTTGGT  | 0  | 24 | RDR2-sensitive |
| GGCTGGACGACGGCTTAACAACCTT | 1  | 13 | RDR2-sensitive |
| GGCTGGACTTGGACCGAGCTAGAC  | 0  | 9  | RDR2-sensitive |
| GGCTGGAGCTGGGCTGTCGCACGG  | 0  | 9  | RDR2-sensitive |
| GGCTGGAGTAGAAATGGACGTCAT  | 1  | 15 | RDR2-sensitive |
| GGCTGGAGTAGGAATGGACGTCAT  | 2  | 29 | RDR2-sensitive |
| GGCTGGATCGGCGAGATGGCGAAC  | 0  | 19 | RDR2-sensitive |
| GGCTGGATCTCAGTGGATCGTGCC  | 53 | 17 | RDR2-resistant |
| GGCTGGCGGCTGGAAGCTGGAGGC  | 0  | 58 | RDR2-sensitive |
| GGCTGGCGTGTAGAAGGCAGGCAC  | 0  | 9  | RDR2-sensitive |
| GGCTGGGAGGAGGGCCGAGGGCCGG | 25 | 0  | RDR2-resistant |
| GGCTGGGCGCTCGGCTTAGGCATC  | 22 | 0  | RDR2-resistant |
| GGCTGGGCTGTCTGTTTCGATGGCG | 4  | 32 | RDR2-sensitive |
| GGCTGGTCTGAACGGCAAATGTAG  | 0  | 16 | RDR2-sensitive |

|                           |     |    |                |
|---------------------------|-----|----|----------------|
| GGCTGTCCGTCGATGGCAGAACGG  | 0   | 14 | RDR2-sensitive |
| GGCTGTGAGCTGTGGAAAAAGCAG  | 0   | 20 | RDR2-sensitive |
| GGCTGTGCTGTTGGAAAGATGTAG  | 0   | 13 | RDR2-sensitive |
| GGCTGTGGACTGCAATCTCCGGCT  | 236 | 14 | RDR2-resistant |
| GGCTTATTTTCGGCGGCTTCTGGC  | 0   | 9  | RDR2-sensitive |
| GGCTTCAATATGATCGTTGCAGGA  | 0   | 36 | RDR2-sensitive |
| GGCTTCAGCTCTGGCAGTAGACCT  | 0   | 15 | RDR2-sensitive |
| GGCTTCGGACCAGGCTTCATTCCC  | 78  | 2  | RDR2-resistant |
| GGCTTCGTCTGAGAGGCGTCCGGAG | 1   | 13 | RDR2-sensitive |
| GGCTTCTCTGCCTGACGATCGGAC  | 1   | 13 | RDR2-sensitive |
| GGCTTCTTCGTTCATCGTCTGCAGA | 23  | 0  | RDR2-resistant |
| GGCTTGAAGTGCCTGAGTCTGCAT  | 1   | 16 | RDR2-sensitive |
| GGCTTGAGCTGTGTCGGATCGGAC  | 0   | 11 | RDR2-sensitive |
| GGCTTGGACCAGATCGGACCGGAC  | 0   | 18 | RDR2-sensitive |
| GGCTTGGACGGAACACCGGGCGGC  | 0   | 9  | RDR2-sensitive |
| GGCTTGGACGGAACACCGGGCGGC  | 0   | 15 | RDR2-sensitive |
| GGCTTGGACTATGATCAGGACGAG  | 0   | 12 | RDR2-sensitive |
| GGCTTGGACTTGGACCGACACGGT  | 0   | 9  | RDR2-sensitive |
| GGCTTGGCCCTGAAGACTGGACGG  | 0   | 20 | RDR2-sensitive |
| GGCTTGGCGTAGAGAAGACTCGGC  | 0   | 28 | RDR2-sensitive |
| GGCTTGGCGTAGACCGGCACTGC   | 0   | 18 | RDR2-sensitive |
| GGCTTTAGAGCATCGGATCGACGG  | 0   | 10 | RDR2-sensitive |
| GGCTTTATCGTGCCTATGGACTAA  | 0   | 15 | RDR2-sensitive |
| GGCTTTGTGCGGAAGCGACCTGAG  | 0   | 18 | RDR2-sensitive |
| GGCTTTTCGGACTAGCACGAGCAT  | 0   | 77 | RDR2-sensitive |
| GGCTTTTCGGGCTAGCACGAGCAC  | 0   | 24 | RDR2-sensitive |
| GGCTTTTGTCACTGTAAGGGGGAG  | 17  | 0  | RDR2-resistant |
| GGCTTTTTATCGGACACTCGGCAA  | 3   | 20 | RDR2-sensitive |
| GGGAAAAATGTAGAGGGGACCGCT  | 0   | 11 | RDR2-sensitive |
| GGGAAACTGTAGCCCCTATACGGT  | 0   | 24 | RDR2-sensitive |
| GGGAAACTGTTGGCGAATGGCGTC  | 0   | 9  | RDR2-sensitive |
| GGGAAAGAGAACGCTGACGTGGCA  | 0   | 15 | RDR2-sensitive |
| GGGAACACTGGCAGAACACGGAAT  | 0   | 28 | RDR2-sensitive |
| GGGAACCTGGAGGACTGGATCGGC  | 0   | 15 | RDR2-sensitive |
| GGGAACCTGTCTGTTTCGATGGCGC | 5   | 42 | RDR2-sensitive |
| GGGAACGACAGAACACGGAATGAC  | 0   | 10 | RDR2-sensitive |
| GGGAACGAGAATGTTGGACGGAAA  | 0   | 23 | RDR2-sensitive |
| GGGAACGAGGAACGAGGAACACGG  | 1   | 31 | RDR2-sensitive |
| GGGAACGAGGAACGGGAACGAGGA  | 0   | 13 | RDR2-sensitive |
| GGGAACTGTAGACGATACGGTGAC  | 0   | 15 | RDR2-sensitive |
| GGGAACTGTGGACGCCTACGGTAG  | 0   | 37 | RDR2-sensitive |
| GGGAACTTGAGGAGCTGATGCGGC  | 47  | 3  | RDR2-resistant |
| GGGAAGAAGAACAGCAGCACGCGT  | 3   | 29 | RDR2-sensitive |
| GGGAAGACGGCAGAACCGTGCACC  | 0   | 20 | RDR2-sensitive |
| GGGAAGAGAACGCTGACGTGGCAC  | 0   | 16 | RDR2-sensitive |
| GGGAAGAGGCGGACATACCTGTTC  | 0   | 9  | RDR2-sensitive |
| GGGAAGATCTGTGGAATAGGGGCA  | 0   | 17 | RDR2-sensitive |
| GGGAAGCTGTTAGAGCAGAAGCAA  | 0   | 51 | RDR2-sensitive |
| GGGAAGCTGTTGGAGCAGAAGCAA  | 0   | 25 | RDR2-sensitive |

|                           |    |     |                |
|---------------------------|----|-----|----------------|
| GGGAAGGCTGTAGACAGGTCGTCA  | 0  | 13  | RDR2-sensitive |
| GGGAATCGGAAAGGCAGAACACGG  | 0  | 21  | RDR2-sensitive |
| GGGAATGACAGAACACGGAATGGC  | 0  | 11  | RDR2-sensitive |
| GGGAATGACAGAACCGGGAATGGC  | 0  | 24  | RDR2-sensitive |
| GGGAATGAGAATGGCAGAACCAGG  | 0  | 11  | RDR2-sensitive |
| GGGAATGGACTGTACGCAGGGAGG  | 0  | 12  | RDR2-sensitive |
| GGGAATGGCAGAACAACACGGAAT  | 0  | 12  | RDR2-sensitive |
| GGGAATGGCAGAACACGGAATGAC  | 1  | 28  | RDR2-sensitive |
| GGGAATGGCAGAACACGGAATGAG  | 0  | 22  | RDR2-sensitive |
| GGGAATGGCAGAACACGGAATGGC  | 1  | 83  | RDR2-sensitive |
| GGGAATGGCAGAACACGGAATGGG  | 0  | 28  | RDR2-sensitive |
| GGGAATGGCAGAACAGAACACGGA  | 0  | 17  | RDR2-sensitive |
| GGGAATGGCAGAACATGGAATGGC  | 0  | 23  | RDR2-sensitive |
| GGGAATGGGAATGACAGAACACGG  | 1  | 25  | RDR2-sensitive |
| GGGAATGGGAATGGCAGAACACGG  | 0  | 13  | RDR2-sensitive |
| GGGAATTGGACTGGGTTCGAGACGG | 0  | 11  | RDR2-sensitive |
| GGGACAAAGTCGGGTACATCTCAT  | 0  | 25  | RDR2-sensitive |
| GGGACAACAGAGGTCAGAGGACGA  | 0  | 12  | RDR2-sensitive |
| GGGACAACAGGGGACAACACTAGA  | 1  | 14  | RDR2-sensitive |
| GGGACAACAGGGGACAACACTGGA  | 0  | 16  | RDR2-sensitive |
| GGGACAACCTTAGGACAGACAGGAC | 0  | 16  | RDR2-sensitive |
| GGGACAATCAAGATAGGGACGTCA  | 0  | 9   | RDR2-sensitive |
| GGGACAATCTGTACAGTCGTCGGA  | 0  | 11  | RDR2-sensitive |
| GGGACACACATAATGAGACGCTAT  | 0  | 13  | RDR2-sensitive |
| GGGACACACGATACTACGGACGGT  | 0  | 16  | RDR2-sensitive |
| GGGACACATGTAGATACGGGGAAG  | 0  | 9   | RDR2-sensitive |
| GGGACACCAATAGAGTAGAGACGA  | 0  | 10  | RDR2-sensitive |
| GGGACACCCTTCGCAGGACTCGGC  | 11 | 306 | RDR2-sensitive |
| GGGACACGAGCAGACGTAGGCTTT  | 0  | 14  | RDR2-sensitive |
| GGGACACGCAGCGACAATTTACTC  | 1  | 18  | RDR2-sensitive |
| GGGACACTCGACACAGAGGAACAC  | 0  | 12  | RDR2-sensitive |
| GGGACACTCGGCACACAGGAACAC  | 0  | 10  | RDR2-sensitive |
| GGGACACTGTTCACTCCTAGAGGC  | 0  | 10  | RDR2-sensitive |
| GGGACAGAAGGAGTACGCGACAAT  | 44 | 0   | RDR2-resistant |
| GGGACAGCACGATCTGACGGAAGC  | 0  | 9   | RDR2-sensitive |
| GGGACAGCCAGGACAGGGACGTCT  | 0  | 13  | RDR2-sensitive |
| GGGACAGCGACCAGCACGACGGAC  | 0  | 10  | RDR2-sensitive |
| GGGACAGCGACCAGCACGATGGAC  | 0  | 29  | RDR2-sensitive |
| GGGACAGCGTGGACATATTAACGG  | 0  | 10  | RDR2-sensitive |
| GGGACAGCTGAAGACTGACAGGAT  | 0  | 9   | RDR2-sensitive |
| GGGACAGTCAGGACAGGACGTCAT  | 0  | 16  | RDR2-sensitive |
| GGGACATATCATCAGAGTGGGGCT  | 1  | 12  | RDR2-sensitive |
| GGGACATGGAGAGGACGACGGGCA  | 0  | 12  | RDR2-sensitive |
| GGGACATGTATAACGAGAGGCTAC  | 0  | 11  | RDR2-sensitive |
| GGGACATGTGTATCTCACGGCAAG  | 0  | 13  | RDR2-sensitive |
| GGGACCAATGTGAAGACGGACAGG  | 0  | 16  | RDR2-sensitive |
| GGGACCAGTGGCATAACAAGGAATG | 0  | 41  | RDR2-sensitive |
| GGGACCCCCTAGATCGACGTGGAA  | 0  | 9   | RDR2-sensitive |
| GGGACCCGCCTTAAGCCGTCGGAA  | 0  | 16  | RDR2-sensitive |



|                          |    |    |                |
|--------------------------|----|----|----------------|
| GGGACCCGTCTTAAGCCGTCGGAA | 0  | 9  | RDR2-sensitive |
| GGGACCGACACGTAGAGGGCGCTG | 2  | 16 | RDR2-sensitive |
| GGGACCGACACGTAGGAGGCGCTG | 0  | 13 | RDR2-sensitive |
| GGGACCGACACGTAGGGGACGCTG | 1  | 20 | RDR2-sensitive |
| GGGACCGACACGTAGGGGGCGCTG | 5  | 24 | RDR2-sensitive |
| GGGACCGCAGTGCCGGACTCGGAC | 0  | 11 | RDR2-sensitive |
| GGGACCGGATACGGATAGTTAGAA | 1  | 22 | RDR2-sensitive |
| GGGACCGTAGCTCCATGCAGTCTG | 0  | 16 | RDR2-sensitive |
| GGGACCTAGATGTGCTACTCGGAA | 0  | 22 | RDR2-sensitive |
| GGGACCTTCGGCGATGAAGCAGGC | 0  | 11 | RDR2-sensitive |
| GGGACGAAATAGACTGGCTTCGAA | 0  | 9  | RDR2-sensitive |
| GGGACGAACACGAAGGCCGCGGGA | 12 | 54 | RDR2-sensitive |
| GGGACGAACGAGCGAGTGCGGTAG | 0  | 28 | RDR2-sensitive |
| GGGACGAAGACGGACGAAGACGAC | 0  | 53 | RDR2-sensitive |
| GGGACGAAGGGAATAAAAGGCGA  | 0  | 18 | RDR2-sensitive |
| GGGACGAAGGGAATAAAAGGCGG  | 3  | 78 | RDR2-sensitive |
| GGGACGACAGAACAGAGAAGCGAC | 0  | 9  | RDR2-sensitive |
| GGGACGAGGAATAGGATACCATAC | 1  | 17 | RDR2-sensitive |
| GGGACGAGGCATCTGAAGCAGGAG | 0  | 10 | RDR2-sensitive |
| GGGACGAGTGAATATAGGGGATGA | 0  | 17 | RDR2-sensitive |
| GGGACGAGTGAATATAGGGGATGG | 0  | 47 | RDR2-sensitive |
| GGGACGATGCAGGAACGACGCTGC | 0  | 9  | RDR2-sensitive |
| GGGACGCAAGCTGTATGAGCGGAT | 0  | 9  | RDR2-sensitive |
| GGGACGCAGATGAGGGATTTGATT | 20 | 0  | RDR2-resistant |
| GGGACGCATGCTGGTACGGGACGT | 1  | 15 | RDR2-sensitive |
| GGGACGCCTACAGAGCATGACGAC | 1  | 20 | RDR2-sensitive |
| GGGACGCGCGGTGATGGCTCGAAT | 17 | 0  | RDR2-resistant |
| GGGACGCGTAATACGACAGGACGC | 2  | 24 | RDR2-sensitive |
| GGGACGCTGTAGAGGGCACCGCTG | 0  | 11 | RDR2-sensitive |
| GGGACGCTGTAGGGGCACCGCTGC | 0  | 30 | RDR2-sensitive |
| GGGACGCTTGGGAATGGGAAACGG | 0  | 12 | RDR2-sensitive |
| GGGACGGATACAGAACGGGACCGG | 0  | 9  | RDR2-sensitive |
| GGGACGGATACGGACGGATACTAG | 0  | 15 | RDR2-sensitive |
| GGGACGGTTGGCTCGGACCTGGCA | 4  | 29 | RDR2-sensitive |
| GGGACGTGAGCCTGGCTGACGACG | 3  | 25 | RDR2-sensitive |
| GGGACGTGAGCTTGGCTGACGACG | 0  | 9  | RDR2-sensitive |
| GGGACGTGATTGTTGCCGGATAA  | 0  | 14 | RDR2-sensitive |
| GGGACGTGGTAATGTAGACGACAC | 0  | 11 | RDR2-sensitive |
| GGGACGTGTAATACGACAGGACGC | 0  | 15 | RDR2-sensitive |
| GGGACGTTACTGAGTGGACGGTTG | 0  | 9  | RDR2-sensitive |
| GGGACGTTCTGCCTGAAGTAGCAT | 1  | 18 | RDR2-sensitive |
| GGGACGTTCTGCTCGAATCGGTAT | 0  | 24 | RDR2-sensitive |
| GGGACGTTCTGTACGAACCGGTAT | 0  | 16 | RDR2-sensitive |
| GGGACTACATCCGGCGATTCTCGA | 2  | 14 | RDR2-sensitive |
| GGGACTAGACCTGAGTGCCTAGAC | 1  | 16 | RDR2-sensitive |
| GGGACTAGCAGACTTCGACGGAGC | 1  | 18 | RDR2-sensitive |
| GGGACTCAGCTGAGGCAGCCATGC | 3  | 21 | RDR2-sensitive |
| GGGACTCGACGACAGCGCAACACC | 0  | 10 | RDR2-sensitive |
| GGGACTCGGACACTCGGCAAAGGC | 0  | 9  | RDR2-sensitive |

|                           |     |    |                |
|---------------------------|-----|----|----------------|
| GGGACTCGGATCTAAGCACGATGC  | 0   | 12 | RDR2-sensitive |
| GGGACTGAACGAGGACGCGCCGTG  | 0   | 11 | RDR2-sensitive |
| GGGACTGATTGCATACTGGCGAAG  | 0   | 13 | RDR2-sensitive |
| GGGACTGCACGACGTACATCTTCC  | 0   | 12 | RDR2-sensitive |
| GGGACTGCACTCTAGAGGAGCTGG  | 0   | 11 | RDR2-sensitive |
| GGGACTGCACTGCGTACACCTTCC  | 1   | 13 | RDR2-sensitive |
| GGGACTGCACTGCGTACATCTGCC  | 4   | 22 | RDR2-sensitive |
| GGGACTGCACTGCGTACATCTTCC  | 7   | 26 | RDR2-sensitive |
| GGGACTGCACTGCGTACCCCTTCC  | 0   | 16 | RDR2-sensitive |
| GGGACTGCGAGTGCAGACGAGAG   | 0   | 13 | RDR2-sensitive |
| GGGACTGCGGCAGCCTCACGGACG  | 0   | 10 | RDR2-sensitive |
| GGGACTGGGCGTGCATACTGCATA  | 0   | 11 | RDR2-sensitive |
| GGGACTGTAAACGTAGAGAGGCC   | 0   | 13 | RDR2-sensitive |
| GGGACTGTAGTATATATAGATGTA  | 21  | 2  | RDR2-resistant |
| GGGACTTCGTGCCCGTCCAGAGGA  | 16  | 0  | RDR2-resistant |
| GGGACTTGGCGATAACGACGAGCT  | 0   | 22 | RDR2-sensitive |
| GGGACTTGGCGATAACGGCGAGCT  | 1   | 19 | RDR2-sensitive |
| GGGACTTGGCGTAGACGAGGATGG  | 2   | 17 | RDR2-sensitive |
| GGGACTTGTTTGGGACAGCTCCAA  | 0   | 10 | RDR2-sensitive |
| GGGAGAATCTGACTGTGAGGAGAA  | 0   | 27 | RDR2-sensitive |
| GGGAGAATCTGACTGTGTAGAGAA  | 0   | 10 | RDR2-sensitive |
| GGGAGAATCTGGCTGTGAGAAGAA  | 0   | 17 | RDR2-sensitive |
| GGGAGAATCTGGCTGTGTAGAGAA  | 9   | 33 | RDR2-sensitive |
| GGGAGACGACGACCTAGACCACTC  | 0   | 9  | RDR2-sensitive |
| GGGAGACGGATGCGGAGACTGCTG  | 1   | 24 | RDR2-sensitive |
| GGGAGACGGGTACTCTACAACCTC  | 0   | 20 | RDR2-sensitive |
| GGGAGACGGGTACTCTACAGCTTC  | 2   | 25 | RDR2-sensitive |
| GGGAGACGGGTTCTCTACATCTTC  | 0   | 12 | RDR2-sensitive |
| GGGAGACTGGTGAGCAACGGCAAA  | 0   | 18 | RDR2-sensitive |
| GGGAGACTGTCTGTTTCGATGGCGC | 0   | 10 | RDR2-sensitive |
| GGGAGAGCGGGCTGGACAGCGGCT  | 102 | 15 | RDR2-resistant |
| GGGAGAGGCTCTGCACGGACGGGA  | 0   | 17 | RDR2-sensitive |
| GGGAGATGGCAGAACAATGGTGCA  | 0   | 11 | RDR2-sensitive |
| GGGAGCAAGTGGAATGAAGGGTAT  | 1   | 50 | RDR2-sensitive |
| GGGAGCCCACTCTGCGACGCCGGT  | 0   | 11 | RDR2-sensitive |
| GGGAGCGAGATGTAGACGGATTAA  | 0   | 37 | RDR2-sensitive |
| GGGAGCTCATAGTAGATGCCTGGC  | 0   | 16 | RDR2-sensitive |
| GGGAGCTCTCTGTTTCGATGGCGCA | 0   | 9  | RDR2-sensitive |
| GGGAGCTGCTGGAGACGTCTACAG  | 0   | 23 | RDR2-sensitive |
| GGGAGGACGGGCTGACGAACAGGC  | 0   | 16 | RDR2-sensitive |
| GGGAGGACTGGGGATGACTGCGGC  | 1   | 15 | RDR2-sensitive |
| GGGAGGAGGGCCGAGGGCGGGTGA  | 73  | 4  | RDR2-resistant |
| GGGAGGCAGAACGGCAGAACGACA  | 0   | 9  | RDR2-sensitive |
| GGGAGGCAGAACGGCAGAACGCAG  | 0   | 36 | RDR2-sensitive |
| GGGAGGCAGAACGGCAGAACGGCA  | 0   | 16 | RDR2-sensitive |
| GGGAGGCTCTGGTACCATGTAGAA  | 0   | 13 | RDR2-sensitive |
| GGGAGGCTGTAGTGAGGCTTCATT  | 0   | 32 | RDR2-sensitive |
| GGGAGGCTGTCTGCTCGATGGCGC  | 0   | 17 | RDR2-sensitive |
| GGGAGGCTGTCTGTTTCGATGGCGC | 0   | 30 | RDR2-sensitive |

|                           |     |    |                |
|---------------------------|-----|----|----------------|
| GGGAGGCTGTGCACTGGACTCGGC  | 0   | 10 | RDR2-sensitive |
| GGGAGGTTACTGGAGGCTGACGGC  | 0   | 9  | RDR2-sensitive |
| GGGAGGTTGACGGAGATACTAGAG  | 6   | 32 | RDR2-sensitive |
| GGGAGTAGAGGACGACGAATGTGC  | 1   | 15 | RDR2-sensitive |
| GGGAGTCTGGCTGTGCGCGTGCAA  | 0   | 10 | RDR2-sensitive |
| GGGAGTGGAGGACGAGTCGATTGC  | 0   | 9  | RDR2-sensitive |
| GGGAGTGGGAGGCAGAACCGTGCA  | 0   | 22 | RDR2-sensitive |
| GGGAGTGTACAGCGCGATGGCAGA  | 0   | 9  | RDR2-sensitive |
| GGGAGTGTGGGACCACCTCGGCAT  | 0   | 18 | RDR2-sensitive |
| GGGAGTGTGGGACCACCTCGGCGT  | 1   | 19 | RDR2-sensitive |
| GGGAGTTACGTTATCCACGTCGGC  | 0   | 14 | RDR2-sensitive |
| GGGATAATTCTGAGGCTCACACGG  | 0   | 31 | RDR2-sensitive |
| GGGATACGGAGAGGGAGTCTGCTG  | 0   | 14 | RDR2-sensitive |
| GGGATACGGATTGTAACGGGTCAG  | 0   | 10 | RDR2-sensitive |
| GGGATACTGAGACCTGGACACGGA  | 0   | 11 | RDR2-sensitive |
| GGGATAGACTTAGACGGAGGGTAG  | 0   | 18 | RDR2-sensitive |
| GGGATAGATGGCAGAACCGTGAC   | 0   | 23 | RDR2-sensitive |
| GGGATATACGGAAAACGGGACGGA  | 1   | 13 | RDR2-sensitive |
| GGGATATGCAGCCTGACTGAGCGG  | 0   | 40 | RDR2-sensitive |
| GGGATCCGTTGGACATGGCATGGC  | 30  | 0  | RDR2-resistant |
| GGGATCGGACAACCTGGTGGGCGGA | 0   | 11 | RDR2-sensitive |
| GGGATCGGATACGGATAGTTAGAA  | 2   | 16 | RDR2-sensitive |
| GGGATCTCGGCGTAGTAGCGGATT  | 0   | 12 | RDR2-sensitive |
| GGGATGAAAACGGTCGGGAACGGT  | 0   | 10 | RDR2-sensitive |
| GGGATGAACGCAATCGGACGGTTG  | 0   | 9  | RDR2-sensitive |
| GGGATGAATCAACCCGGCTTAGAA  | 0   | 12 | RDR2-sensitive |
| GGGATGACACGTCACGAAGCTCGG  | 1   | 17 | RDR2-sensitive |
| GGGATGATAGAATGGACGGCTGAA  | 0   | 9  | RDR2-sensitive |
| GGGATGCATTTGTCTCGTCTGGAC  | 0   | 10 | RDR2-sensitive |
| GGGATGCGGAGTCTGCTGGAGCGC  | 0   | 9  | RDR2-sensitive |
| GGGATGGACTGCGGGATCGGACGG  | 1   | 59 | RDR2-sensitive |
| GGGATGGATTTGTCTCGTCTGGAC  | 1   | 19 | RDR2-sensitive |
| GGGATGGATTTGTCTCGTTTGGAC  | 0   | 21 | RDR2-sensitive |
| GGGATGGTTCGTTGGCAGCCGGTGA | 45  | 0  | RDR2-resistant |
| GGGATGGTTCGGATCTGAGGAGA   | 0   | 22 | RDR2-sensitive |
| GGGATGTGAGAGACCGGTATGCAC  | 1   | 19 | RDR2-sensitive |
| GGGATGTTGTGACTGAGCCGGCCT  | 0   | 13 | RDR2-sensitive |
| GGGATTAGTGGAGAGGTAGACGGT  | 0   | 22 | RDR2-sensitive |
| GGGATTCCTGGAGACGCGATGGAG  | 0   | 10 | RDR2-sensitive |
| GGGATTCTGTGGTTCGTGGTGGTC  | 45  | 0  | RDR2-resistant |
| GGGATTGCGGCATTTTTCTCTATG  | 17  | 0  | RDR2-resistant |
| GGGATTGGACGGCTGAGATTGTAG  | 0   | 11 | RDR2-sensitive |
| GGGATTGTAGCGTTAGCACGAGCT  | 0   | 18 | RDR2-sensitive |
| GGGATTGTATCTAGAGCAAGCCGG  | 0   | 14 | RDR2-sensitive |
| GGGATTGTGCGTAGGAGCGGTGTT  | 23  | 0  | RDR2-resistant |
| GGGATTTCAAGGAACACGACGGTC  | 0   | 9  | RDR2-sensitive |
| GGGATTTGATTGTGTGTCGTCGGT  | 105 | 0  | RDR2-resistant |
| GGGCAAGACTGCATGAGACTCCAA  | 1   | 66 | RDR2-sensitive |
| GGGCACAGAGTAGTCACAAGGCAT  | 0   | 10 | RDR2-sensitive |

|                           |    |    |                |
|---------------------------|----|----|----------------|
| GGGCACGACTGCAGCGACTGAAGA  | 0  | 13 | RDR2-sensitive |
| GGGCACGCGGCACTACTCGTCGG   | 0  | 9  | RDR2-sensitive |
| GGGCACGCGGCGACATTCCTCGT   | 1  | 13 | RDR2-sensitive |
| GGGCACGTAGATGGCAGAACAGGT  | 0  | 15 | RDR2-sensitive |
| GGGCACTCGGCAAAGAAGGCTTTG  | 10 | 28 | RDR2-sensitive |
| GGGCAGAACCTGACGAGAAGTCGT  | 0  | 60 | RDR2-sensitive |
| GGGCAGAACGCGGCTACTGTGGAC  | 1  | 17 | RDR2-sensitive |
| GGGCAGAACTGTACGCGCGCACAC  | 0  | 9  | RDR2-sensitive |
| GGGCAGATCTCCAACCTGGGACGAC | 31 | 4  | RDR2-resistant |
| GGGCAGCTGGGACAGGCAGGACAA  | 0  | 14 | RDR2-sensitive |
| GGGCAGGAACAGTAGACCAAGGCA  | 1  | 12 | RDR2-sensitive |
| GGGCAGGATGGCAGAACAGTGCAC  | 0  | 9  | RDR2-sensitive |
| GGGCAGGCTGCATCTGTGGAGACA  | 0  | 11 | RDR2-sensitive |
| GGGCAGGGCGTAGCGTATGTCTGG  | 0  | 10 | RDR2-sensitive |
| GGGCAGTCTCGGACGCAGACGTGC  | 0  | 42 | RDR2-sensitive |
| GGGCAGTCTGTGACCTGGCAGCAG  | 1  | 27 | RDR2-sensitive |
| GGGCAGTGTGCGGCGACAGCTCTTC | 0  | 12 | RDR2-sensitive |
| GGGCATACTTGTAAAGGATGGGCAC | 0  | 10 | RDR2-sensitive |
| GGGCATAGTGTGCGGCTAGCACGG  | 0  | 10 | RDR2-sensitive |
| GGGCATCTACCAGGGGTAGGACGG  | 0  | 16 | RDR2-sensitive |
| GGGCATCTGGACTGGTTTCGGCGAA | 0  | 10 | RDR2-sensitive |
| GGGCATCTTAGACGAAGGACGGTC  | 0  | 15 | RDR2-sensitive |
| GGGCATGCGTACTGTGCTGGACGG  | 0  | 16 | RDR2-sensitive |
| GGGCATGGATTGAGGCATGGATTT  | 0  | 20 | RDR2-sensitive |
| GGGCATGGCAGATGATGACGACAT  | 0  | 9  | RDR2-sensitive |
| GGGCATTTGGTCTAGTGGTATGAT  | 17 | 0  | RDR2-resistant |
| GGGCCACGCGTCTGACTGAGCGGAG | 0  | 25 | RDR2-sensitive |
| GGGCCACGGTAGAACTGATGTGGC  | 0  | 12 | RDR2-sensitive |
| GGGCCAGACTGTGCGCGATGGCGT  | 0  | 28 | RDR2-sensitive |
| GGGCCAGTGGCATAACAAGGAACGA | 0  | 12 | RDR2-sensitive |
| GGGCCATGACTGAGGACGTGACAC  | 0  | 12 | RDR2-sensitive |
| GGGCCATTGTAGAGTGGACGGTTG  | 0  | 24 | RDR2-sensitive |
| GGGCCCATGTAACGCACGTTCCGGA | 0  | 20 | RDR2-sensitive |
| GGGCCCGGACAGGAAATTAGGCAC  | 0  | 9  | RDR2-sensitive |
| GGGCCCGGCCTGTCAGATACGGTT  | 0  | 9  | RDR2-sensitive |
| GGGCCGGGCAAAGACTACAGTTGA  | 0  | 14 | RDR2-sensitive |
| GGGCCGGGCGTGCAGACTGCAGAC  | 0  | 13 | RDR2-sensitive |
| GGGCCGGGCTGTTTCGACAGGCTAA | 0  | 26 | RDR2-sensitive |
| GGGCCTCAAATTCGACCCGTCGG   | 4  | 43 | RDR2-sensitive |
| GGGCCTCAATTTCCGTCCCGTCGG  | 0  | 10 | RDR2-sensitive |
| GGGCCTCCCTGTATCGAGCCGGAC  | 0  | 15 | RDR2-sensitive |
| GGGCCTCGGATTTTACTGGCACGG  | 0  | 17 | RDR2-sensitive |
| GGGCCTCGGGCGAGACGGAAGTCT  | 0  | 10 | RDR2-sensitive |
| GGGCCTCGGGCGAGTCGAAGGTGC  | 3  | 16 | RDR2-sensitive |
| GGGCCTGCATCTGGTTCGGACGGTC | 1  | 21 | RDR2-sensitive |
| GGGCCTGGCTGAGTAGAAACACGG  | 0  | 14 | RDR2-sensitive |
| GGGCCTTAAATTCAGCTCGTCGT   | 0  | 9  | RDR2-sensitive |
| GGGCCTTGGGACTGAACGAGGACG  | 5  | 48 | RDR2-sensitive |
| GGGCGACGACTTCGTACGGCGGAC  | 27 | 4  | RDR2-resistant |

|                           |    |     |                |
|---------------------------|----|-----|----------------|
| GGGCGACGGTAGACGGCAGAACCA  | 0  | 9   | RDR2-sensitive |
| GGGCGACGGTATGAAGATAGCAAC  | 1  | 15  | RDR2-sensitive |
| GGGCGACTCGACCGCGGACGGTAA  | 2  | 20  | RDR2-sensitive |
| GGGCGACTGTATGAAGATAGCAAC  | 0  | 10  | RDR2-sensitive |
| GGGCGACTTACACTCTGTCACGGT  | 0  | 9   | RDR2-sensitive |
| GGGCGAGTCTGAAGAGCGGATGAG  | 0  | 20  | RDR2-sensitive |
| GGGCGCCTAGAGGAGGCTTCTGAA  | 0  | 10  | RDR2-sensitive |
| GGGCGCTCTGCAGGCAGCTGACGA  | 0  | 10  | RDR2-sensitive |
| GGGCGCTGTAGAGGGCACCGCTGC  | 0  | 47  | RDR2-sensitive |
| GGGCGCTGTAGGAGGCACCGCTGC  | 0  | 16  | RDR2-sensitive |
| GGGCGCTGTAGGGGGCACCGCTGC  | 3  | 22  | RDR2-sensitive |
| GGGCGGACGGTTGTGGCGAGGGCA  | 0  | 15  | RDR2-sensitive |
| GGGCGGATACGGACGGATAGTAGC  | 1  | 29  | RDR2-sensitive |
| GGGCGGATACGGACGGATATTAGC  | 0  | 10  | RDR2-sensitive |
| GGGCGTGTAGAGGACGTGTCTGAA  | 0  | 93  | RDR2-sensitive |
| GGGCGTTATGTTATTCTCGTCGGC  | 1  | 26  | RDR2-sensitive |
| GGGCGTTCGGTAGAGCGGGGGCAG  | 0  | 26  | RDR2-sensitive |
| GGGCGTTGTTCGGCAGCATAGGCAT | 0  | 45  | RDR2-sensitive |
| GGGCGTTTCTTAGAACAGTCGGTG  | 1  | 12  | RDR2-sensitive |
| GGGCGTTTGGTAGAGCGGGGGCAG  | 1  | 13  | RDR2-sensitive |
| GGGCTACGATTGATCGGTAAGGCT  | 0  | 12  | RDR2-sensitive |
| GGGCTAGACGGTCTGTAACCTGGG  | 0  | 9   | RDR2-sensitive |
| GGGCTCAGACAGTAACTAGGCAC   | 0  | 11  | RDR2-sensitive |
| GGGCTCAGACTTCGGCTCACGGAC  | 0  | 9   | RDR2-sensitive |
| GGGCTCCATGGGATCTGAAGCGGT  | 0  | 10  | RDR2-sensitive |
| GGGCTCCTGCACCAGGTCGCGGAC  | 7  | 76  | RDR2-sensitive |
| GGGCTCCTGTACCAGGTCGCGGAC  | 2  | 20  | RDR2-sensitive |
| GGGCTCGGACAAGAACTAGGCAC   | 6  | 165 | RDR2-sensitive |
| GGGCTCGGACAAGAAATTAGGCAC  | 1  | 29  | RDR2-sensitive |
| GGGCTCGGACAAGATATTAGGCAC  | 0  | 15  | RDR2-sensitive |
| GGGCTCGGACAGAAACTAGGCAA   | 0  | 10  | RDR2-sensitive |
| GGGCTCGGACAGAAACTAGGCAC   | 3  | 20  | RDR2-sensitive |
| GGGCTCGGACAGAAACTAGGCAT   | 4  | 25  | RDR2-sensitive |
| GGGCTCGGACAGGAACTAGGCAC   | 7  | 148 | RDR2-sensitive |
| GGGCTCGGACAGGAAATTAGGCAC  | 11 | 201 | RDR2-sensitive |
| GGGCTCGGACATGAACTAGGCAT   | 0  | 32  | RDR2-sensitive |
| GGGCTCGGATAGGAAATTAGGCAC  | 4  | 17  | RDR2-sensitive |
| GGGCTCGGCCTGTCAAACACGGTT  | 0  | 10  | RDR2-sensitive |
| GGGCTCGGGCGAGACGGAACTGT   | 0  | 23  | RDR2-sensitive |
| GGGCTCTCGGAAGTTAGACTGCGG  | 1  | 15  | RDR2-sensitive |
| GGGCTGATCGGGCTACAGGCACGG  | 0  | 12  | RDR2-sensitive |
| GGGCTGCAGGAACGGCAGATTGAG  | 0  | 41  | RDR2-sensitive |
| GGGCTGCGGCGTAGGCTTAAGTGC  | 0  | 20  | RDR2-sensitive |
| GGGCTGCGGCTGAAGACCTGCTCC  | 1  | 19  | RDR2-sensitive |
| GGGCTGGACTGCTGCGCCTGCGGC  | 2  | 16  | RDR2-sensitive |
| GGGCTGGACTTGGGCTGGGACGAC  | 0  | 10  | RDR2-sensitive |
| GGGCTGGATCGGCGCAGTAGCTAT  | 0  | 13  | RDR2-sensitive |
| GGGCTGGGACTAGAGAACGACGAA  | 0  | 14  | RDR2-sensitive |
| GGGCTGGGCGTAGACGAACAGCAC  | 0  | 25  | RDR2-sensitive |

|                           |    |     |                |
|---------------------------|----|-----|----------------|
| GGGCTGGTCCGGCACTGTTTTGGA  | 0  | 16  | RDR2-sensitive |
| GGGCTGTATGTATGGAGACGAGCT  | 0  | 14  | RDR2-sensitive |
| GGGCTTCCTGTAGTTAGAGAGAGC  | 0  | 15  | RDR2-sensitive |
| GGGCTTCGCCAGTATGCCATCGGA  | 0  | 24  | RDR2-sensitive |
| GGGCTTCGCCAGTATGTCATCGGA  | 1  | 24  | RDR2-sensitive |
| GGGCTTCGTGCCGACTCGCGGGC   | 0  | 16  | RDR2-sensitive |
| GGGCTTCGTGCTGGTCTCGCGGGC  | 0  | 9   | RDR2-sensitive |
| GGGCTTGACTTGAGACACGGACAC  | 0  | 19  | RDR2-sensitive |
| GGGCTTGAGCTGTGTCCGATCGGA  | 0  | 15  | RDR2-sensitive |
| GGGCTTGACAAGAACTAGGCAC    | 4  | 69  | RDR2-sensitive |
| GGGCTTGACAGAAACTAGGCAC    | 0  | 22  | RDR2-sensitive |
| GGGCTTGACAGGAAACTAGGCAA   | 1  | 37  | RDR2-sensitive |
| GGGCTTGACAGGAAACTAGGCAC   | 48 | 936 | RDR2-sensitive |
| GGGCTTGACAGGAAACTAGGCAT   | 0  | 42  | RDR2-sensitive |
| GGGCTTGACAGGAAATTAGGCAC   | 2  | 14  | RDR2-sensitive |
| GGGCTTGACAGGGAAGTGGCAGC   | 2  | 53  | RDR2-sensitive |
| GGGCTTGACATGAACTAGGCAC    | 0  | 19  | RDR2-sensitive |
| GGGCTTACTGTTGGAGCGGAGTG   | 0  | 9   | RDR2-sensitive |
| GGGCTTCTCTCGTTTCGTCTGAC   | 0  | 11  | RDR2-sensitive |
| GGGGAAAACAGGAACGAGACGGA   | 0  | 9   | RDR2-sensitive |
| GGGGAAACTGTAGCCCCTATACGG  | 0  | 10  | RDR2-sensitive |
| GGGGAAACTGTTGGCGAATGGCGT  | 0  | 21  | RDR2-sensitive |
| GGGGAAAGAGAACGCTGACGTGGC  | 1  | 16  | RDR2-sensitive |
| GGGGAAAGGTAGGATAGAGACGTC  | 0  | 25  | RDR2-sensitive |
| GGGGAACAGAACGCTGACGTGGCA  | 0  | 9   | RDR2-sensitive |
| GGGGAACCGCGGAACAGGATTCCG  | 1  | 32  | RDR2-sensitive |
| GGGGAACCGCTGAAGACAGTCTAA  | 0  | 9   | RDR2-sensitive |
| GGGGAACCGCTGAAGACAGTCTGA  | 0  | 31  | RDR2-sensitive |
| GGGGAACCGCTGAAGACAGTCTTA  | 0  | 15  | RDR2-sensitive |
| GGGGAACTCTGCTGTGACGGGCG   | 1  | 15  | RDR2-sensitive |
| GGGGAACTGTAGACGATACGGTGA  | 0  | 21  | RDR2-sensitive |
| GGGGAAGACGACAGAACCGTGCAC  | 1  | 24  | RDR2-sensitive |
| GGGGAAGAGAACGCTGACGTGGCA  | 1  | 14  | RDR2-sensitive |
| GGGGAAGCTGTTAGAGCAGAAGCA  | 0  | 10  | RDR2-sensitive |
| GGGGAAGCTGTTGGAGCAGAAGCA  | 0  | 9   | RDR2-sensitive |
| GGGGAATCGATGGGGACGGTTGAT  | 32 | 4   | RDR2-resistant |
| GGGGAATTAGGACGAGACGCGGTG  | 0  | 15  | RDR2-sensitive |
| GGGGACAACAAGCGCGAGCTCGGC  | 37 | 0   | RDR2-resistant |
| GGGGACAAGGGACACAGTATGAGG  | 1  | 21  | RDR2-sensitive |
| GGGGACACATCTGACGGCCTTCCT  | 0  | 9   | RDR2-sensitive |
| GGGGACACGAGAAAAGGGAAGACAG | 0  | 14  | RDR2-sensitive |
| GGGGACAGCCTGAACACATAGAGG  | 0  | 10  | RDR2-sensitive |
| GGGGACAGCTCAAACATGATGGGG  | 0  | 15  | RDR2-sensitive |
| GGGGACAGGTAGGATAGAGACGTC  | 0  | 17  | RDR2-sensitive |
| GGGGACAGGTGAGAGGCAAGATGT  | 0  | 13  | RDR2-sensitive |
| GGGGACAGTGAACAAGGCATCCCG  | 0  | 9   | RDR2-sensitive |
| GGGGACAGTGAACAGTTGGGTCCG  | 0  | 12  | RDR2-sensitive |
| GGGGACCGAACGCACCAAAGATGT  | 0  | 18  | RDR2-sensitive |
| GGGGACCGAATTTAGGGGACGTTG  | 0  | 9   | RDR2-sensitive |

|                           |     |    |                |
|---------------------------|-----|----|----------------|
| GGGGACCGACACGTAGAGGGGCGCT | 0   | 10 | RDR2-sensitive |
| GGGGACCGACACGTAGGAGGGCGCT | 0   | 12 | RDR2-sensitive |
| GGGGACCGACACGTAGGGACGCTG  | 0   | 9  | RDR2-sensitive |
| GGGGACCGACACGTAGGGAGCGCT  | 0   | 17 | RDR2-sensitive |
| GGGGACCGACACGTAGGGGACGCT  | 0   | 22 | RDR2-sensitive |
| GGGGACCGACACGTAGGGGCGCTG  | 0   | 17 | RDR2-sensitive |
| GGGGACCGACACGTAGGGGGCGCT  | 4   | 29 | RDR2-sensitive |
| GGGGACCGATCCGCAGGACGTGAG  | 23  | 0  | RDR2-resistant |
| GGGGACCTGCCGACTTGACGGAGA  | 1   | 17 | RDR2-sensitive |
| GGGGACGAGGACGAGACAGACGCT  | 0   | 12 | RDR2-sensitive |
| GGGGACGAGGACGAGACAGGCGCT  | 22  | 48 | RDR2-sensitive |
| GGGGACGCAGATGAGGGATTTGAT  | 49  | 0  | RDR2-resistant |
| GGGGACGCATAGGAACAGGTCCAG  | 0   | 9  | RDR2-sensitive |
| GGGGACGCTGAGAACGCGGACGTC  | 0   | 9  | RDR2-sensitive |
| GGGGACGCTGTAGAGGGCACCGCT  | 1   | 13 | RDR2-sensitive |
| GGGGACGCTGTAGGGGCACCGCTG  | 1   | 16 | RDR2-sensitive |
| GGGGACGGCCATGAACTTCGCGTA  | 13  | 42 | RDR2-sensitive |
| GGGGACGGCCATGAACTTGGCGTA  | 4   | 27 | RDR2-sensitive |
| GGGGACGGGAACAGGCTACCATAC  | 0   | 10 | RDR2-sensitive |
| GGGGACGGTAAACGGTAAACAGGAC | 0   | 9  | RDR2-sensitive |
| GGGGACGGTCTACACTGCTAACTT  | 0   | 44 | RDR2-sensitive |
| GGGGACGTAGCTCAAATGGTAGAG  | 33  | 6  | RDR2-resistant |
| GGGGACGTAGCTCATATGGTAGAG  | 86  | 5  | RDR2-resistant |
| GGGGACGTCAGACTCATACGGCAA  | 0   | 10 | RDR2-sensitive |
| GGGGACTAGACCGATGAGGAGGAC  | 0   | 13 | RDR2-sensitive |
| GGGGACTGCGAGTGCGAGACGAGA  | 0   | 36 | RDR2-sensitive |
| GGGGACTGGTGCGCTGACGTGCTG  | 0   | 9  | RDR2-sensitive |
| GGGGACTGTGACAAGTGGTATCAG  | 0   | 12 | RDR2-sensitive |
| GGGGAGAAGGGGGATACTGTAGCC  | 0   | 9  | RDR2-sensitive |
| GGGGAGACGGACACGGAAGGCAGG  | 0   | 12 | RDR2-sensitive |
| GGGGAGACTGTAGTGGGGCTCCAT  | 0   | 13 | RDR2-sensitive |
| GGGGAGAGCGGGCTGGACAGCGGC  | 217 | 27 | RDR2-resistant |
| GGGGAGGCGACTGAGAATGGCATA  | 0   | 9  | RDR2-sensitive |
| GGGGAGGCTGTAGTGAGGCACTAT  | 0   | 29 | RDR2-sensitive |
| GGGGAGGCTGTAGTGGGGCTCCAT  | 0   | 12 | RDR2-sensitive |
| GGGGAGGGCAGAACGGCAGAACAC  | 1   | 22 | RDR2-sensitive |
| GGGGAGTGTAGAGAGCGACGTCTA  | 0   | 17 | RDR2-sensitive |
| GGGGATACACGCACGACGACGACC  | 0   | 17 | RDR2-sensitive |
| GGGGATATGTAGGATAGGGACGTC  | 0   | 12 | RDR2-sensitive |
| GGGGATCCCTGGACCGACGAGTAA  | 0   | 23 | RDR2-sensitive |
| GGGGATCCGCGAGGACAAAGATGG  | 0   | 12 | RDR2-sensitive |
| GGGGATCCGCGGGCGTCAATGGCG  | 15  | 0  | RDR2-resistant |
| GGGGATCCTCGGCAGAACCGTGCA  | 0   | 16 | RDR2-sensitive |
| GGGGATCGAGCCGGGGATGACGTG  | 0   | 26 | RDR2-sensitive |
| GGGGATCGAGGACGGGGAACAGGC  | 0   | 13 | RDR2-sensitive |
| GGGGATCGGGAGGTAGAGGATGGC  | 1   | 16 | RDR2-sensitive |
| GGGGATGCACGAACGACGACGGGA  | 1   | 18 | RDR2-sensitive |
| GGGGATGGACGCAATCGGACAGTC  | 0   | 10 | RDR2-sensitive |
| GGGGATGGACGCAATCGGACGGTC  | 1   | 24 | RDR2-sensitive |

|                           |     |    |                |
|---------------------------|-----|----|----------------|
| GGGGATGGGTATGAAGATGGATCA  | 0   | 11 | RDR2-sensitive |
| GGGGATGGGTATGGGGATGGATCA  | 0   | 14 | RDR2-sensitive |
| GGGGATGGTCGTTGGCAGCCGGTG  | 65  | 0  | RDR2-resistant |
| GGGGATGTAGCTCAAATGGTAGAG  | 246 | 28 | RDR2-resistant |
| GGGGATGTAGCTCAGATGGTAGAG  | 298 | 43 | RDR2-resistant |
| GGGGATGTAGTTCAGATGGTAGAA  | 176 | 37 | RDR2-resistant |
| GGGGATGTTAGACTGTGTGTGGGC  | 0   | 24 | RDR2-sensitive |
| GGGGATTATGTTAACTCCCGTCGG  | 1   | 23 | RDR2-sensitive |
| GGGGATTCCCTTAACTCTCGTCGGC | 1   | 22 | RDR2-sensitive |
| GGGGATTGTTTGGCCACCAGGCGT  | 1   | 13 | RDR2-sensitive |
| GGGGATTTGGGGAGGCTAGACGGT  | 0   | 16 | RDR2-sensitive |
| GGGGCAACGGTACACTAACCTGAA  | 56  | 1  | RDR2-resistant |
| GGGGCACCCCTTCAGATCGATCGA  | 1   | 28 | RDR2-sensitive |
| GGGGCACGCGGCACACTCACTCGT  | 3   | 24 | RDR2-sensitive |
| GGGGCACGCGGCGACAATTTACTC  | 3   | 24 | RDR2-sensitive |
| GGGGCACGCGGCGACATTTCACTCG | 0   | 16 | RDR2-sensitive |
| GGGGCACGCGGCGACATTTCACTC  | 0   | 11 | RDR2-sensitive |
| GGGGCACGTAGATGGCAGAACCAG  | 0   | 69 | RDR2-sensitive |
| GGGGCACTGTAGGAGGCACCGCTG  | 0   | 9  | RDR2-sensitive |
| GGGGCAGAGGCAGAACAATGTGCA  | 0   | 16 | RDR2-sensitive |
| GGGGCATCGTCACTTGAATCGGAT  | 65  | 4  | RDR2-resistant |
| GGGGCATGGATTGAGGCATGGATT  | 0   | 15 | RDR2-sensitive |
| GGGGCCAGTGGCATAACAAGGAACG | 0   | 90 | RDR2-sensitive |
| GGGGCCAGTGGCATAACAAGGAATG | 1   | 21 | RDR2-sensitive |
| GGGGCCTTCGGTCTTGGTCGTCTC  | 1   | 14 | RDR2-sensitive |
| GGGGCGCTGTAGAGGCACCGCTGC  | 0   | 9  | RDR2-sensitive |
| GGGGCGCTGTAGAGGGCACCGCTG  | 1   | 80 | RDR2-sensitive |
| GGGGCGCTGTAGGAGGCACCGCTG  | 1   | 26 | RDR2-sensitive |
| GGGGCGCTGTAGGGGCACCGCTGC  | 0   | 49 | RDR2-sensitive |
| GGGGCGCTGTAGGGGCATCGCTGC  | 0   | 9  | RDR2-sensitive |
| GGGGCTATGGTAGAGGCAAGTCAA  | 0   | 19 | RDR2-sensitive |
| GGGGCTATGTGGAAGTACAGATGG  | 0   | 11 | RDR2-sensitive |
| GGGGCTCCATAGAATCCGAAGCGG  | 0   | 14 | RDR2-sensitive |
| GGGGCTCCATGAACTCGGCAGCGG  | 0   | 21 | RDR2-sensitive |
| GGGGCTCCATGGACTCGGCAGCGG  | 0   | 15 | RDR2-sensitive |
| GGGGCTGACTGTCGTATGGTGAC   | 3   | 31 | RDR2-sensitive |
| GGGGCTGAGAACCACCGACGTCAT  | 0   | 46 | RDR2-sensitive |
| GGGGCTGAGAACCACCGTCGTCAT  | 3   | 62 | RDR2-sensitive |
| GGGGCTGAGAACCGCCGTCGTCAT  | 8   | 26 | RDR2-sensitive |
| GGGGCTGAGTCCTCTGTCTGACGG  | 0   | 9  | RDR2-sensitive |
| GGGGCTGAGTTACAAAGACAGCAT  | 0   | 33 | RDR2-sensitive |
| GGGGCTGATTGATGGGTACCACAA  | 0   | 14 | RDR2-sensitive |
| GGGGCTGATTGCAACGTTCTCCA   | 0   | 33 | RDR2-sensitive |
| GGGGCTGCTACCCTAGAACCAAGC  | 0   | 11 | RDR2-sensitive |
| GGGGCTGGGGGTTGAACAGAAGGC  | 0   | 10 | RDR2-sensitive |
| GGGGCTGGTGTCCGACGAATACGG  | 6   | 46 | RDR2-sensitive |
| GGGGCTGTAGCAAGTACCGGGGCA  | 0   | 11 | RDR2-sensitive |
| GGGGCTGTAGGGGGCACTCCACGG  | 1   | 18 | RDR2-sensitive |
| GGGGCTTAAATACTTCGGACCGGA  | 1   | 29 | RDR2-sensitive |



|                           |     |    |                |
|---------------------------|-----|----|----------------|
| GGGGCTTCAGAACTATGTGCGGCC  | 0   | 9  | RDR2-sensitive |
| GGGGCTTCAGAATGGACACGCGCA  | 0   | 20 | RDR2-sensitive |
| GGGGCTTCCTGTAGTTAGAGAGAG  | 1   | 12 | RDR2-sensitive |
| GGGGCTTTCGACGACTTCATCGAC  | 24  | 1  | RDR2-resistant |
| GGGGGAAACTGTATAACGGCGCCT  | 0   | 14 | RDR2-sensitive |
| GGGGGAACAGAACGCTGATGTGGC  | 1   | 17 | RDR2-sensitive |
| GGGGGAACCGCTGAAGACAGTCTC  | 0   | 13 | RDR2-sensitive |
| GGGGGAACCGCTGAAGACAGTCTG  | 0   | 24 | RDR2-sensitive |
| GGGGGACACATACAAGGATACTGA  | 0   | 10 | RDR2-sensitive |
| GGGGGACCGATCCGCAGGACGTGA  | 39  | 1  | RDR2-resistant |
| GGGGGACTGTAGTGAGGCTCCATA  | 0   | 13 | RDR2-sensitive |
| GGGGGACTTGCTGCTGCCTGCGGC  | 30  | 5  | RDR2-resistant |
| GGGGGAGGAGTAGGAGCGCACATA  | 17  | 0  | RDR2-resistant |
| GGGGGATGGTGTGCTGACGGTAA   | 0   | 10 | RDR2-sensitive |
| GGGGGATTGGAGGAGATTGATGGA  | 0   | 10 | RDR2-sensitive |
| GGGGGCACGTAGATGGCAGAACAG  | 0   | 40 | RDR2-sensitive |
| GGGGGCACGTAGATGGCAGAACCA  | 0   | 28 | RDR2-sensitive |
| GGGGGCACTGTAGGGGGCACCACT  | 0   | 9  | RDR2-sensitive |
| GGGGGCAGTCTACGGTACTCTCTT  | 0   | 16 | RDR2-sensitive |
| GGGGGCATCAGACGGAACACCTAG  | 0   | 14 | RDR2-sensitive |
| GGGGGCGACTGTAGTGGCACGGCG  | 0   | 13 | RDR2-sensitive |
| GGGGGCGCTGTAGAGGGCACCGCT  | 0   | 15 | RDR2-sensitive |
| GGGGGCGCTGTAGGAGGCACCGCT  | 1   | 13 | RDR2-sensitive |
| GGGGGCGCTGTGGAGCAGAGGGGA  | 60  | 3  | RDR2-resistant |
| GGGGGCTGCATACCCAGATCTCGA  | 2   | 42 | RDR2-sensitive |
| GGGGGCTGCTCTCGAAAAACCGG   | 4   | 24 | RDR2-sensitive |
| GGGGGGACCAGATCTGAGACCGGC  | 1   | 19 | RDR2-sensitive |
| GGGGGGACTGCCTCATCGTTGGGA  | 0   | 10 | RDR2-sensitive |
| GGGGGTAGATCTGAGCAAGACGTC  | 0   | 18 | RDR2-sensitive |
| GGGGGTCCCTGAACCGACGAGTAA  | 1   | 12 | RDR2-sensitive |
| GGGGGTCTCTGGACCGACGAGTAA  | 0   | 12 | RDR2-sensitive |
| GGGGGTGAACAATGGCGACAACAG  | 2   | 18 | RDR2-sensitive |
| GGGGGTGGTAGCTTGCATGGAAGA  | 36  | 0  | RDR2-resistant |
| GGGGGTGTAGCTCATATGGTAGAG  | 132 | 7  | RDR2-resistant |
| GGGGTAACATCTCGGTTGTAGGTC  | 0   | 12 | RDR2-sensitive |
| GGGGTACGTAGATGGCAGAACCGG  | 0   | 75 | RDR2-sensitive |
| GGGGTAGAACCGAACAAAGACCGTA | 0   | 10 | RDR2-sensitive |
| GGGGTAGAACCGGGCGCATAACAT  | 0   | 15 | RDR2-sensitive |
| GGGGTAGAACCGTGCACCGTGAAC  | 0   | 9  | RDR2-sensitive |
| GGGGTAGATCTGAGCAAGACGTCC  | 0   | 25 | RDR2-sensitive |
| GGGGTCACTGTAGAAGCTTCGGTA  | 0   | 31 | RDR2-sensitive |
| GGGGTCAGGGGAGGCAGCTGTAGC  | 0   | 9  | RDR2-sensitive |
| GGGGTCATGCTGTGGATCGATGGC  | 1   | 70 | RDR2-sensitive |
| GGGGTCGAACTAGGACTAGAGGAC  | 2   | 15 | RDR2-sensitive |
| GGGGTCGAACTGGGACTAGAGGAC  | 1   | 16 | RDR2-sensitive |
| GGGGTCGGGTGCTGAACCGGCGCA  | 1   | 12 | RDR2-sensitive |
| GGGGTCTATCCTTGCGTTCGTCGT  | 0   | 14 | RDR2-sensitive |
| GGGGTCTGTAGTGGTTAAGATGGA  | 0   | 21 | RDR2-sensitive |
| GGGGTGACAGTGGATAACTACGGA  | 0   | 9  | RDR2-sensitive |

|                           |     |    |                |
|---------------------------|-----|----|----------------|
| GGGGTGA CTGGAGCCTCACGCGGT | 2   | 19 | RDR2-sensitive |
| GGGGTGGAACATAGCGAGGACGAA  | 1   | 21 | RDR2-sensitive |
| GGGGTGGATAGGCGGAAACTGAAA  | 1   | 12 | RDR2-sensitive |
| GGGGTGGCCTGTAGCCGTCACGGA  | 1   | 12 | RDR2-sensitive |
| GGGGTGGGCTGTGGAGGAGGACGG  | 0   | 14 | RDR2-sensitive |
| GGGGTGGTACCCGATTGAAGGAAC  | 113 | 2  | RDR2-resistant |
| GGGGTGTTAGGTGCTCTGGTCGGA  | 0   | 10 | RDR2-sensitive |
| GGGGTTACCAGCTGAGAATTAGGC  | 0   | 10 | RDR2-sensitive |
| GGGGTTAGGGCACTAGAAGATCGC  | 14  | 0  | RDR2-resistant |
| GGGGTTGGAATGATGATGGAGCAG  | 0   | 15 | RDR2-sensitive |
| GGGGTTGGACGTGGAGAAGATGGT  | 1   | 25 | RDR2-sensitive |
| GGGGTTGGGCGTGAGGAAGATGGT  | 0   | 13 | RDR2-sensitive |
| GGGGTTGGGCTGATCAACGGTGCA  | 0   | 13 | RDR2-sensitive |
| GGGGTTGTACGAGGTCCGTTGGAC  | 0   | 12 | RDR2-sensitive |
| GGGGTTGTAGAACGACGGCCACGC  | 0   | 10 | RDR2-sensitive |
| GGGTAAACACCAGAGACGCGGATA  | 0   | 18 | RDR2-sensitive |
| GGGTAAACTGCTGAAGACGACCAA  | 0   | 17 | RDR2-sensitive |
| GGGTAACCTGTTGAACACGGTATC  | 0   | 11 | RDR2-sensitive |
| GGGTAACTGAGAACCGCCAGTGGA  | 0   | 10 | RDR2-sensitive |
| GGGTAAGCAAAGCAGGTAGGACGC  | 0   | 13 | RDR2-sensitive |
| GGGTACACTGTAGCCGCTATAGGA  | 3   | 24 | RDR2-sensitive |
| GGGTACGTAGATGGCAGAACCGGT  | 0   | 26 | RDR2-sensitive |
| GGGTACGTAGCGGGAGTGTGTTGAC | 14  | 0  | RDR2-resistant |
| GGGTACTCGTGCAGGACGAGCTGT  | 0   | 22 | RDR2-sensitive |
| GGGTACTCTAGGAATGAGACGGAT  | 0   | 10 | RDR2-sensitive |
| GGGTACTGTAGCATATATATAGGC  | 14  | 0  | RDR2-resistant |
| GGGTACTTCAGATTCGGGACGGAT  | 0   | 9  | RDR2-sensitive |
| GGGTAGAAACCAAGTTGGACCGGC  | 0   | 31 | RDR2-sensitive |
| GGGTAGAACAGTGAATGGCAGAAC  | 0   | 12 | RDR2-sensitive |
| GGGTAGAACCTAGCGAAGTGCGC   | 0   | 17 | RDR2-sensitive |
| GGGTAGAACGCGGATACATGGAAC  | 0   | 10 | RDR2-sensitive |
| GGGTAGAACGCGGATATATGGTTC  | 0   | 13 | RDR2-sensitive |
| GGGTAGAATCTTTTTTGACGGGTA  | 0   | 19 | RDR2-sensitive |
| GGGTAGAATTCGGGTACCCGGTAT  | 0   | 13 | RDR2-sensitive |
| GGGTAGAATTTTTTTTGATGGGTA  | 0   | 10 | RDR2-sensitive |
| GGGTAGACACGAGCAACACGACAT  | 0   | 14 | RDR2-sensitive |
| GGGTAGACAGTAGGAATAGACGAT  | 0   | 38 | RDR2-sensitive |
| GGGTAGACATGAGCAGCACGACGT  | 0   | 10 | RDR2-sensitive |
| GGGTAGAGGGCAGGGACTTTTCAT  | 18  | 0  | RDR2-resistant |
| GGGTAGATCTGAGCAAGACGTCCA  | 2   | 17 | RDR2-sensitive |
| GGGTAGATCTGAGCAAGACGTCGA  | 0   | 17 | RDR2-sensitive |
| GGGTAGCACACTCGGCATAGTCAG  | 0   | 12 | RDR2-sensitive |
| GGGTAGCACTGAACAATCCGGTGA  | 0   | 15 | RDR2-sensitive |
| GGGTAGCGGATCTTGGTCTCGGAC  | 9   | 35 | RDR2-sensitive |
| GGGTAGGACATGCGTGCAAAC TAG | 0   | 9  | RDR2-sensitive |
| GGGTAGGACGGTGCTGTCTGACTGT | 0   | 43 | RDR2-sensitive |
| GGGTAGGACGGTGCTGTTGACTGT  | 1   | 27 | RDR2-sensitive |
| GGGTAGTACACTCGGCATATCCAG  | 0   | 20 | RDR2-sensitive |
| GGGTAGTGCGGGCTTACTCGGCGT  | 0   | 20 | RDR2-sensitive |

|                           |    |    |                |
|---------------------------|----|----|----------------|
| GGGTAGTTAAGATTCGGGACGGAT  | 1  | 45 | RDR2-sensitive |
| GGGTATGGGGATGGGTATGAAGAT  | 0  | 10 | RDR2-sensitive |
| GGGTATTAAATGTAGTCGGATTAT  | 3  | 71 | RDR2-sensitive |
| GGGTCAAACCTGGGACTAGAGGACG | 1  | 14 | RDR2-sensitive |
| GGGTCACTGTAGAGGATCCGGCGC  | 0  | 14 | RDR2-sensitive |
| GGGTCAGCAGAGAACGACAGAGCA  | 1  | 18 | RDR2-sensitive |
| GGGTCAGGCTGTATTTTCGTCGGC  | 0  | 17 | RDR2-sensitive |
| GGGTCAGTCTGTTAGCTCGTCGGC  | 0  | 33 | RDR2-sensitive |
| GGGTCATCTGTCTGGGCTATGGCAT | 0  | 9  | RDR2-sensitive |
| GGGTCATGCTGTGGATCGATGGCT  | 0  | 29 | RDR2-sensitive |
| GGGTCATGTCTGGGCTCGAGTCGGA | 0  | 10 | RDR2-sensitive |
| GGGTCCGATGGCATACTGACGAAG  | 0  | 12 | RDR2-sensitive |
| GGGTCCGATGGCATACTGGCGAAG  | 0  | 71 | RDR2-sensitive |
| GGGTCCGGAGTAGTCACATGGCAT  | 0  | 10 | RDR2-sensitive |
| GGGTCCGGAGTGGTTCATGGCAT   | 0  | 11 | RDR2-sensitive |
| GGGTCCGTAGATCTCAAGCAAGGC  | 0  | 14 | RDR2-sensitive |
| GGGTCCTGTAGATGACTAGTGCAT  | 1  | 17 | RDR2-sensitive |
| GGGTCGAAGGGTCGGACGAGGCGA  | 0  | 38 | RDR2-sensitive |
| GGGTCGATTTCCGATATCCAACGG  | 19 | 1  | RDR2-resistant |
| GGGTCGCGGTAGCGGCACGTCGGC  | 2  | 15 | RDR2-sensitive |
| GGGTCGGAATTGGAGAGTGGAGGC  | 0  | 19 | RDR2-sensitive |
| GGGTCGGCGCGAGACGGAACACAA  | 2  | 39 | RDR2-sensitive |
| GGGTCGGGCTGGGACCAGAGGACG  | 0  | 11 | RDR2-sensitive |
| GGGTCGGGCTGTCACGTGGGCTAT  | 0  | 14 | RDR2-sensitive |
| GGGTCGTGACTCTGGACTAGACGG  | 0  | 10 | RDR2-sensitive |
| GGGTCGTGCTGTGCTCCAGGCCGG  | 0  | 71 | RDR2-sensitive |
| GGGTCGTGTGGAACAAACGGCGAT  | 0  | 11 | RDR2-sensitive |
| GGGTCTCAAATTTCCGGCTCGTCGG | 0  | 13 | RDR2-sensitive |
| GGGTCTCTGTGGAGAACGGGATGG  | 0  | 13 | RDR2-sensitive |
| GGGTCTGGACTGTTCCGACGGAGAG | 1  | 17 | RDR2-sensitive |
| GGGTCTGGCTGTGGTGTAGGCTTG  | 0  | 13 | RDR2-sensitive |
| GGGTCTGTGAACCAGCAGGGAGTC  | 39 | 4  | RDR2-resistant |
| GGGTCTGTTGAACGGTCGATCCGG  | 1  | 24 | RDR2-sensitive |
| GGGTCTTAAATTCGGTCCGTCGA   | 0  | 11 | RDR2-sensitive |
| GGGTGAACTGCTGAACACGGTCTT  | 0  | 16 | RDR2-sensitive |
| GGGTGAACTGCTGGACACGGTGTT  | 0  | 12 | RDR2-sensitive |
| GGGTGAACTGCTGTAGTCGGCCTT  | 0  | 14 | RDR2-sensitive |
| GGGTGAAGACGGAACCAACAACAT  | 0  | 19 | RDR2-sensitive |
| GGGTGAATCTGGATCTGGACGGAT  | 0  | 9  | RDR2-sensitive |
| GGGTGACAAACACCAGCTCGTCTG  | 0  | 9  | RDR2-sensitive |
| GGGTGACGAGGATGATGCGGATAG  | 18 | 0  | RDR2-resistant |
| GGGTGACTGGAGCCTCACGCGGTG  | 1  | 39 | RDR2-sensitive |
| GGGTGACTGGGTCCTGCTGCGGCT  | 0  | 9  | RDR2-sensitive |
| GGGTGAGACTGTGAGAGAGACTGC  | 0  | 19 | RDR2-sensitive |
| GGGTGATGTGGACGCTGAGGAGGT  | 29 | 0  | RDR2-resistant |
| GGGTGATTGGTAGGCTACGCTCAG  | 0  | 19 | RDR2-sensitive |
| GGGTGCCGATGGGAACATGGACGG  | 10 | 30 | RDR2-sensitive |
| GGGTGGAACATAGCGAGGACGAAC  | 0  | 26 | RDR2-sensitive |
| GGGTGGACAGAGTAGGAGAGAGCA  | 0  | 27 | RDR2-sensitive |

|                            |    |     |                |
|----------------------------|----|-----|----------------|
| GGGTGGACCATGGCATACTCTATG   | 0  | 14  | RDR2-sensitive |
| GGGTGGACTGAACGACGGACGGTT   | 0  | 16  | RDR2-sensitive |
| GGGTGGACTGTGTAGATTCACGGA   | 0  | 9   | RDR2-sensitive |
| GGGTGGATCTCTGATACAGTGGCT   | 0  | 11  | RDR2-sensitive |
| GGGTGGGATTCGTAGGCGGGGGCA   | 0  | 9   | RDR2-sensitive |
| GGGTGGTACCCGATTGAAGGAACA   | 84 | 0   | RDR2-resistant |
| GGGTGTAGATCTGAGCAAGGCGTC   | 0  | 10  | RDR2-sensitive |
| GGGTGTCCGGTGCATACAAAGCAC   | 0  | 18  | RDR2-sensitive |
| GGGTGTCCGGTGCATACAAAGCAT   | 0  | 16  | RDR2-sensitive |
| GGGTGTCTGATGTCTGTTGGACAA   | 2  | 18  | RDR2-sensitive |
| GGGTGTGGACGCCTACAGTAGACA   | 49 | 2   | RDR2-resistant |
| GGGTGTTGAGCTGAAGGTCGTCGT   | 0  | 18  | RDR2-sensitive |
| GGGTGTTTGGTCTAGTGGTATGAT   | 14 | 0   | RDR2-resistant |
| GGGTTACTGTTATTGATCGGCTCC   | 65 | 6   | RDR2-resistant |
| GGGTTATCTGTGCTCTGTTGTCGG   | 3  | 17  | RDR2-sensitive |
| GGGTTTCATCCCGCAATGGAACCA   | 23 | 0   | RDR2-resistant |
| GGGTTCCGCACTGGAGCTGGCGGA   | 0  | 11  | RDR2-sensitive |
| GGGTTCTCTGTAGGCCGACGGTC    | 0  | 14  | RDR2-sensitive |
| GGGTTGAAAGTCAAGCGGGAACGA   | 0  | 9   | RDR2-sensitive |
| GGGTTGAACCAGGTTGTAGAGGTA   | 0  | 24  | RDR2-sensitive |
| GGGTTGACGCAAGACGGAACACAA   | 0  | 18  | RDR2-sensitive |
| GGGTTGAGACTGTAGCATGGTGTGTA | 0  | 100 | RDR2-sensitive |
| GGGTTGCATGCAGACTGGGACCGG   | 0  | 13  | RDR2-sensitive |
| GGGTTGCTGGGAAGGGAGCGGGCT   | 0  | 10  | RDR2-sensitive |
| GGGTTGGCGCGAGACGGAACACAA   | 2  | 20  | RDR2-sensitive |
| GGGTTGTCCGAGAGAGAACGGAA    | 0  | 41  | RDR2-sensitive |
| GGGTTTAGGACGGCAAACTCAGC    | 0  | 17  | RDR2-sensitive |
| GGGTTTCCAACCTATCGGCCGGAC   | 0  | 15  | RDR2-sensitive |
| GGGTTTCGCTATATATCATCGGAC   | 0  | 11  | RDR2-sensitive |
| GGGTTTCGGTCTAGGGCTCGGTTT   | 0  | 10  | RDR2-sensitive |
| GGGTTTGGACAGGAACTAGGCAC    | 0  | 90  | RDR2-sensitive |
| GGGTTTGGACATGTCCTAGGCAC    | 0  | 9   | RDR2-sensitive |
| GGGTTTGGCCTGACACGAACACGG   | 0  | 19  | RDR2-sensitive |
| GGGTTTGGTTCCGGCACGAACTCGG  | 0  | 9   | RDR2-sensitive |
| GGTAAAATCTCGGGCACTCGGCAA   | 0  | 22  | RDR2-sensitive |
| GGTAAACGACGCGACGACGAGCTG   | 0  | 15  | RDR2-sensitive |
| GGTAAACGACAGACTGACGGGACAT  | 0  | 10  | RDR2-sensitive |
| GGTAAACGCGGCATGACATACCTGG  | 1  | 30  | RDR2-sensitive |
| GGTAAGACGGGAACACTAGCGCAA   | 0  | 24  | RDR2-sensitive |
| GGTAAGTTCGACGGCCTATTACAT   | 0  | 10  | RDR2-sensitive |
| GGTAAGTTGGAACGGAGCGGCTCT   | 0  | 42  | RDR2-sensitive |
| GGTAATCGGCTGAGTTATGGCATT   | 3  | 34  | RDR2-sensitive |
| GGTAATCTAGAACGGAGCGGCTCT   | 0  | 13  | RDR2-sensitive |
| GGTAATCTGGAACGGAACGGCTCT   | 1  | 20  | RDR2-sensitive |
| GGTAATCTGGAACGGAGCGGCTCT   | 12 | 215 | RDR2-sensitive |
| GGTAATCTGGAACGGAGTGGCTCT   | 1  | 12  | RDR2-sensitive |
| GGTAATCTGGAATGGAGCGGCTCT   | 1  | 31  | RDR2-sensitive |
| GGTAATGGGTTGTATATGGTTGAC   | 32 | 0   | RDR2-resistant |
| GGTACACCCCTGTAGACCCGGCT    | 0  | 12  | RDR2-sensitive |

|                           |    |     |                |
|---------------------------|----|-----|----------------|
| GGTACACCGTTGGATATTGGATGG  | 0  | 12  | RDR2-sensitive |
| GGTACAGATTTCGTCGAAGGCAGAA | 0  | 9   | RDR2-sensitive |
| GGTACCACGTCGGCGCCACGTCGT  | 0  | 9   | RDR2-sensitive |
| GGTACCCTAAGAACCGTCGGAAAC  | 1  | 21  | RDR2-sensitive |
| GGTACCCTAGGAACCGTCGGAAAC  | 0  | 11  | RDR2-sensitive |
| GGTACCCTCGGACTAAAGTCGGCA  | 0  | 11  | RDR2-sensitive |
| GGTACCCTCGGATTCCGCAGACGA  | 0  | 12  | RDR2-sensitive |
| GGTACCGGATACCGCTGCAGACGT  | 0  | 9   | RDR2-sensitive |
| GGTACCGGTAGAACTGCCACGGAC  | 2  | 19  | RDR2-sensitive |
| GGTACCTTCGCCGGCGACGAGCAT  | 0  | 11  | RDR2-sensitive |
| GGTACGAATGATCGCGGCACGGAA  | 0  | 12  | RDR2-sensitive |
| GGTACGACGGGCTAGGTTCCGGCAT | 3  | 39  | RDR2-sensitive |
| GGTACGACTCATGACGGGCTCGAG  | 0  | 10  | RDR2-sensitive |
| GGTACGACTGTAAACGGCCCAAC   | 0  | 24  | RDR2-sensitive |
| GGTACGCGACTGCATCGACGACAT  | 0  | 9   | RDR2-sensitive |
| GGTACGCTACTGAAGAACGAGCAG  | 0  | 12  | RDR2-sensitive |
| GGTACGGATTAGGACTGTGTCCGGT | 0  | 21  | RDR2-sensitive |
| GGTACGGATTGGGATCGTGTCCGGT | 0  | 10  | RDR2-sensitive |
| GGTACGGGACCAGACTGAGCGGCT  | 0  | 21  | RDR2-sensitive |
| GGTACGTGTAGAAGCATGTCGGAT  | 0  | 10  | RDR2-sensitive |
| GGTACGTGTAGGTACATGTCGGAT  | 0  | 17  | RDR2-sensitive |
| GGTACGTTGTACGGCGTGGTAGAC  | 0  | 20  | RDR2-sensitive |
| GGTACTATTGTTGGCATCGATCGT  | 1  | 31  | RDR2-sensitive |
| GGTACTCGGGCTGCGTCGAGGCGT  | 2  | 14  | RDR2-sensitive |
| GGTACTTCGGCTGCGACAAGACGC  | 1  | 14  | RDR2-sensitive |
| GGTACTTGAGCCCTGTAGAAGCGT  | 0  | 10  | RDR2-sensitive |
| GGTAGAACCGCGGCAGTGTGAACGC | 0  | 23  | RDR2-sensitive |
| GGTAGAACGGATGGTTGAGATCGT  | 0  | 17  | RDR2-sensitive |
| GGTAGAACGTGGCTAGTAGAGGTG  | 0  | 11  | RDR2-sensitive |
| GGTAGAAGTGTGGAATGATAGCTT  | 14 | 0   | RDR2-resistant |
| GGTAGAATAAGCGGACGGACTTGG  | 0  | 17  | RDR2-sensitive |
| GGTAGAATAAGCGGGCGGGCTTGG  | 0  | 47  | RDR2-sensitive |
| GGTAGAATGGACGGCTGAGATCGC  | 1  | 119 | RDR2-sensitive |
| GGTAGACACTCGGCACAGACTGGT  | 2  | 31  | RDR2-sensitive |
| GGTAGACCTCTGCACGATGACGAT  | 26 | 1   | RDR2-resistant |
| GGTAGACGGGCTACTCTCCAAGA   | 0  | 9   | RDR2-sensitive |
| GGTAGACGGGCTGCTCTCCAAGA   | 0  | 25  | RDR2-sensitive |
| GGTAGACGGTTTTACTTTTATGAC  | 0  | 10  | RDR2-sensitive |
| GGTAGACTGGCTGAGAGCATATAA  | 0  | 18  | RDR2-sensitive |
| GGTAGAGAGGAAGAACAGGACGCT  | 5  | 20  | RDR2-sensitive |
| GGTAGAGGAGGCAGTAGAGTGATG  | 0  | 9   | RDR2-sensitive |
| GGTAGAGGGCTGCGCTGCGGGACG  | 0  | 63  | RDR2-sensitive |
| GGTAGATCGAGCAGAGCACTGCAT  | 0  | 10  | RDR2-sensitive |
| GGTAGATCTGAGCAAGACGTCCAG  | 1  | 20  | RDR2-sensitive |
| GGTAGCAGGAGGAGTTGGTAGAGG  | 0  | 12  | RDR2-sensitive |
| GGTAGCCTGTCTGAACGGACGCAT  | 2  | 37  | RDR2-sensitive |
| GGTAGCTCTGATGACGACTGTTAC  | 0  | 11  | RDR2-sensitive |
| GGTAGCTCTGATGGCGACTGTTAC  | 0  | 9   | RDR2-sensitive |
| GGTAGCTGTAGGTAGGACGTGGAC  | 21 | 0   | RDR2-resistant |

|                           |    |     |                |
|---------------------------|----|-----|----------------|
| GGTAGGACTCTCTGCGGAGGCGCG  | 0  | 11  | RDR2-sensitive |
| GGTAGGATGGGCTGTAGAATGGGC  | 0  | 17  | RDR2-sensitive |
| GGTAGGCCGACCGTAGGATATCCA  | 0  | 9   | RDR2-sensitive |
| GGTAGGCGGCATGTAGGGCAAGAG  | 0  | 11  | RDR2-sensitive |
| GGTAGGCGGCTGGTACCTTGCAGT  | 0  | 11  | RDR2-sensitive |
| GGTAGGCTCGGACGAGACGGACAT  | 0  | 13  | RDR2-sensitive |
| GGTAGGGCAGGTAAGCGACGACAT  | 0  | 21  | RDR2-sensitive |
| GGTAGGGGGCTGCACTGCAGGACG  | 0  | 10  | RDR2-sensitive |
| GGTAGGGGTGGAGGGCGTTGGGGC  | 94 | 1   | RDR2-resistant |
| GGTAGTAGGCCCTGGGCGCGACGG  | 0  | 9   | RDR2-sensitive |
| GGTAGTCGATGTAGTCATGGGCGG  | 0  | 50  | RDR2-sensitive |
| GGTAGTCGGCCCTGTAGTCGCGGT  | 0  | 14  | RDR2-sensitive |
| GGTAGTCGGGGATGGCAGATGCAA  | 0  | 31  | RDR2-sensitive |
| GGTAGTCGTTTAGGACATGATTGT  | 0  | 30  | RDR2-sensitive |
| GGTAGTGGGATATAGGGATGGAAA  | 0  | 11  | RDR2-sensitive |
| GGTAGTGGGCTCATGACTCGGCAC  | 0  | 23  | RDR2-sensitive |
| GGTAGTGTGGATGCAGGGACGA    | 0  | 10  | RDR2-sensitive |
| GGTAGTTCAGGACTGCAACGGCAC  | 0  | 13  | RDR2-sensitive |
| GGTAGTTGCCTGAACAACGACGGC  | 0  | 12  | RDR2-sensitive |
| GGTAGTTGCCTGAACGACGACGAC  | 0  | 13  | RDR2-sensitive |
| GGTAGTTGCCTGAACGACGACGGC  | 0  | 9   | RDR2-sensitive |
| GGTAGTTGGGAAGTGAACGACGG   | 0  | 9   | RDR2-sensitive |
| GGTATAACCTCGCCGGAGAAGACA  | 0  | 11  | RDR2-sensitive |
| GGTATAACTCGTAGCGCTTCGGCA  | 0  | 19  | RDR2-sensitive |
| GGTATAGATCGGGCTAGCACGGCT  | 0  | 13  | RDR2-sensitive |
| GGTATCAGGCTAACGACTAGGCGC  | 1  | 12  | RDR2-sensitive |
| GGTATCTGATTACGGTGGGACTAA  | 0  | 23  | RDR2-sensitive |
| GGTATCTGATTACGGTTGGACTAA  | 3  | 176 | RDR2-sensitive |
| GGTATGAACTGCTGTGGGGGACAG  | 0  | 9   | RDR2-sensitive |
| GGTATGACTAGCAGGCTGACGGGC  | 0  | 26  | RDR2-sensitive |
| GGTATGGACCTAACTCAGGAGCGG  | 0  | 54  | RDR2-sensitive |
| GGTATGGCTCGTAGTGCTTCGGCA  | 1  | 56  | RDR2-sensitive |
| GGTATGGCTCTAGAGCAGAATCGC  | 2  | 39  | RDR2-sensitive |
| GGTATGTATGTAGGGGTGGCGGGC  | 0  | 9   | RDR2-sensitive |
| GGTATTGTAGAACGGAGCGGTTCT  | 0  | 15  | RDR2-sensitive |
| GGTATTTTAGACACGGATTGGTAT  | 0  | 11  | RDR2-sensitive |
| GGTCAAACCTGGGACTAGAGGACGA | 0  | 16  | RDR2-sensitive |
| GGTCAAAGTAGGATGAGTCGGAGA  | 0  | 9   | RDR2-sensitive |
| GGTCAATCAGGACGGACTTGGCAT  | 0  | 22  | RDR2-sensitive |
| GGTCACAGGCAGGAACCTTAGGCTC | 0  | 21  | RDR2-sensitive |
| GGTCACTCGGCTGACGTACGCGGT  | 1  | 15  | RDR2-sensitive |
| GGTCACTTATAGCCGTCGGACATA  | 0  | 13  | RDR2-sensitive |
| GGTCAGACGGTGGAGACAGACAGA  | 0  | 17  | RDR2-sensitive |
| GGTCAGCAGAGAACGACAGAGCAA  | 0  | 9   | RDR2-sensitive |
| GGTCAGCTCGGCTCGGATCGGCTC  | 0  | 17  | RDR2-sensitive |
| GGTCAGGACTGTGGATGGTCCGGC  | 0  | 11  | RDR2-sensitive |
| GGTCAGGCCTGTGCGCATCAACGAA | 15 | 0   | RDR2-resistant |
| GGTCAGGCTCTAGTAGGACGTCCG  | 0  | 11  | RDR2-sensitive |
| GGTCAGTGACTATGGGCCGGACGG  | 0  | 24  | RDR2-sensitive |

|                           |    |     |                |
|---------------------------|----|-----|----------------|
| GGTCAGTTAGGACGCGGCAACCAA  | 0  | 10  | RDR2-sensitive |
| GGTCATATCGTCGATCGTTTTGCA  | 0  | 12  | RDR2-sensitive |
| GGTCCAAACCCGGCACGGTAGAAT  | 0  | 12  | RDR2-sensitive |
| GGTCCAAGTTCGGCATGATCTGGT  | 0  | 18  | RDR2-sensitive |
| GGTCCACGGCTAGGAACCGACGG   | 0  | 17  | RDR2-sensitive |
| GGTCCACGGTGACGGCACGAACAC  | 0  | 9   | RDR2-sensitive |
| GGTCCAGCGCGGCTGATCGTTCGC  | 0  | 14  | RDR2-sensitive |
| GGTCCATCTCGGACATACGATGGT  | 1  | 17  | RDR2-sensitive |
| GGTCCATCTCGGACTCGCGACGGT  | 0  | 10  | RDR2-sensitive |
| GGTCCATGGTATAGGACTGGACGG  | 0  | 9   | RDR2-sensitive |
| GGTCCCAGTAGGACTGTAGGAGGC  | 0  | 19  | RDR2-sensitive |
| GGTCCGAACCCGGCACGGTAGAAT  | 4  | 287 | RDR2-sensitive |
| GGTCCGAACCCGGCATGGTAGAAT  | 0  | 48  | RDR2-sensitive |
| GGTCCGAACCTGGCACGGTAGAAT  | 0  | 12  | RDR2-sensitive |
| GGTCCGAAGTCGGGTCTAAGACGA  | 0  | 13  | RDR2-sensitive |
| GGTCCGACGGACTAATGGGCCGGC  | 0  | 10  | RDR2-sensitive |
| GGTCCGACTCGGCCTGAAGCACGG  | 0  | 10  | RDR2-sensitive |
| GGTCCGAGCCCGGCACGATAGAAT  | 0  | 9   | RDR2-sensitive |
| GGTCCGAGCCCGGCACGGTAGAAT  | 0  | 38  | RDR2-sensitive |
| GGTCCGCAGACTGGTTGACGCGAC  | 1  | 30  | RDR2-sensitive |
| GGTCCGCCCTGTAGATCAACGGC   | 4  | 55  | RDR2-sensitive |
| GGTCCGCCTTGACTGTGACAGCAT  | 0  | 13  | RDR2-sensitive |
| GGTCCGCGCCTGTAGATCAACGGC  | 5  | 64  | RDR2-sensitive |
| GGTCCGCGGCTCTAGAACGGACGG  | 0  | 15  | RDR2-sensitive |
| GGTCCGCGGCTCTGGTCTGGACGG  | 2  | 21  | RDR2-sensitive |
| GGTCCGCGGTATAGGGCTGTACGG  | 0  | 9   | RDR2-sensitive |
| GGTCCGGAATAGTCGGGAACGGAA  | 1  | 26  | RDR2-sensitive |
| GGTCCGACTGTCCGCGGTACTGT   | 1  | 14  | RDR2-sensitive |
| GGTCCGACTGTCCGCGGTGGTGA   | 1  | 12  | RDR2-sensitive |
| GGTCCGGGCATGTGCAGATCGGCT  | 1  | 18  | RDR2-sensitive |
| GGTCCGGGCTAGCTGGAGACTGGC  | 0  | 22  | RDR2-sensitive |
| GGTCCTAGACTGTAGATGGCGAGC  | 0  | 9   | RDR2-sensitive |
| GGTCCTAGATCGACGGTCCGCGAC  | 2  | 14  | RDR2-sensitive |
| GGTCCTATCGGGTCGGATACCTAA  | 0  | 9   | RDR2-sensitive |
| GGTCCTGTAGACTGTCCGGTGC GC | 12 | 30  | RDR2-sensitive |
| GGTCGAAGGGTCGGACGAGGCGAA  | 0  | 17  | RDR2-sensitive |
| GGTCGACTGTTGAAGTGCAAGTGA  | 0  | 9   | RDR2-sensitive |
| GGTCGAGATTGACGGCAGAACGGA  | 0  | 10  | RDR2-sensitive |
| GGTCGATATCGGTCGTGGCCTCAA  | 0  | 11  | RDR2-sensitive |
| GGTCGATATGGTAGTAGAGGACGA  | 0  | 10  | RDR2-sensitive |
| GGTCGATCTCTCCTGTACGTGGCT  | 1  | 13  | RDR2-sensitive |
| GGTCGCATCTCTGGAGCTAGGCTT  | 0  | 10  | RDR2-sensitive |
| GGTCGCTATAGATATCGTCGGGGA  | 0  | 76  | RDR2-sensitive |
| GGTCGCTATAGATGTCGTCCGGAA  | 0  | 9   | RDR2-sensitive |
| GGTCGCTATAGATGTCGTCCGGGA  | 0  | 20  | RDR2-sensitive |
| GGTCGGCCCACTGTACGCAAGCAT  | 0  | 9   | RDR2-sensitive |
| GGTCGGCCCACTGTACGCGAGCAT  | 0  | 19  | RDR2-sensitive |
| GGTCGTACCCTAGAGCCGGACGGT  | 0  | 26  | RDR2-sensitive |
| GGTCTATCGCTCAGGACCAGACGG  | 0  | 23  | RDR2-sensitive |

|                           |    |    |                |
|---------------------------|----|----|----------------|
| GGTCTATGTCGTCGTTGGCTCCAG  | 0  | 10 | RDR2-sensitive |
| GGTCTCATAGGCAATTGTCGGACA  | 0  | 21 | RDR2-sensitive |
| GGTCTCCTAGGCAGCCGTCGGACA  | 1  | 79 | RDR2-sensitive |
| GGTCTCTATCGTTGGCCCGTGCAT  | 1  | 39 | RDR2-sensitive |
| GGTCTCTGTGGAAGCGTAGACGGT  | 0  | 10 | RDR2-sensitive |
| GGTCTGACCTGAACCCGACACGGC  | 0  | 10 | RDR2-sensitive |
| GGTCTGAGTCCGGCACGGTAGAAT  | 0  | 21 | RDR2-sensitive |
| GGTCTGCATGGCTCCAAGGGACGT  | 1  | 37 | RDR2-sensitive |
| GGTCTGCTTCTGAGGACTGGACGG  | 2  | 15 | RDR2-sensitive |
| GGTCTGGCCATAGATACGGACGGT  | 0  | 11 | RDR2-sensitive |
| GGTCTGTAGCAGTCGACTGTTGGA  | 0  | 9  | RDR2-sensitive |
| GGTCTGTGGCACAGGGTTGGACGG  | 0  | 14 | RDR2-sensitive |
| GGTCTGTTTGGTTGGGCTGTGGCT  | 0  | 12 | RDR2-sensitive |
| GGTCTTAGGTGGACTGGACAGCAT  | 3  | 42 | RDR2-sensitive |
| GGTCTTCGCATTGAACGTCGGTCA  | 0  | 11 | RDR2-sensitive |
| GGTCTTCGTGCCGGGCTCGCGGAC  | 0  | 10 | RDR2-sensitive |
| GGTCTTCTCGTCGGATCGGTTAAG  | 0  | 9  | RDR2-sensitive |
| GGTCTTGTTCTGCTGGCTGATGGA  | 18 | 1  | RDR2-resistant |
| GGTCTTTAGGCTGATCAATCGGAC  | 0  | 10 | RDR2-sensitive |
| GGTGAAAGTGCGGCCTGTAGCGGC  | 0  | 17 | RDR2-sensitive |
| GGTGAACCTGCGGAAGGATCATTG  | 40 | 3  | RDR2-resistant |
| GGTGAACGACGTGACGACGGATGA  | 1  | 16 | RDR2-sensitive |
| GGTGAACGCGACAGGGACGGTGAC  | 0  | 11 | RDR2-sensitive |
| GGTGAACGGACGGACGAACGGTGC  | 0  | 17 | RDR2-sensitive |
| GGTGAAGATGTCGGCATACTGTGA  | 0  | 15 | RDR2-sensitive |
| GGTGAAGTCGGAGGCTAACAGCAT  | 0  | 63 | RDR2-sensitive |
| GGTGAAGTTCGGCCCGCTAGACAC  | 0  | 9  | RDR2-sensitive |
| GGTGAATACTCTGCAGTCGGATGA  | 0  | 9  | RDR2-sensitive |
| GGTGAATCTGCACCGTCCGTTCCGG | 0  | 30 | RDR2-sensitive |
| GGTGACCAGAACTGCCAGAAGCC   | 0  | 10 | RDR2-sensitive |
| GGTGACCTACTGATCTCGGAGCAC  | 0  | 9  | RDR2-sensitive |
| GGTGACGAGGAAGCAGAAGGACAC  | 0  | 11 | RDR2-sensitive |
| GGTGACGCGCAGAACGTAACCTCGA | 0  | 11 | RDR2-sensitive |
| GGTGACGGGCTGACAGCTGACTGC  | 0  | 10 | RDR2-sensitive |
| GGTGACTACTCGCTGGGAGAACGG  | 0  | 10 | RDR2-sensitive |
| GGTGACTGACGACCGAGAAGCGGT  | 0  | 11 | RDR2-sensitive |
| GGTGACTGCTAGATAGGATGGTCCG | 0  | 11 | RDR2-sensitive |
| GGTGACTGGATAGGAGGCTTCGGA  | 0  | 9  | RDR2-sensitive |
| GGTGACTGGCGCATCTGATGGCTC  | 0  | 27 | RDR2-sensitive |
| GGTGACTGTCCGGCCGAACGGGTT  | 0  | 68 | RDR2-sensitive |
| GGTGACTGTGTGGCATTCCGGCGAG | 2  | 15 | RDR2-sensitive |
| GGTGAGACGGTAGTGGGCGCAGAA  | 0  | 14 | RDR2-sensitive |
| GGTGAGACTGTCACCGGAGCTGGC  | 16 | 0  | RDR2-resistant |
| GGTGAGAGATGTAGTAGATGTGTT  | 3  | 16 | RDR2-sensitive |
| GGTGAGCTTTGGGCAGACTGGTCC  | 0  | 19 | RDR2-sensitive |
| GGTGAGGAATTGTGGACGGATGAA  | 0  | 9  | RDR2-sensitive |
| GGTGAGGACAGACACAGTAGGCGC  | 0  | 14 | RDR2-sensitive |
| GGTGAGGATGACGAGTGACGCATG  | 0  | 28 | RDR2-sensitive |
| GGTGAGGATGACTGGTGACGCATG  | 0  | 27 | RDR2-sensitive |



|                           |    |     |                |
|---------------------------|----|-----|----------------|
| GGTGAGGATGAGGATGACGGGTGA  | 0  | 43  | RDR2-sensitive |
| GGTGATCGATCAAGTTTCTGCCGA  | 0  | 10  | RDR2-sensitive |
| GGTGATCGGACGGTCCACGATGGC  | 0  | 9   | RDR2-sensitive |
| GGTGATCGGCAGCAGATCCAGACG  | 0  | 9   | RDR2-sensitive |
| GGTGATCGGCTGAAGACGCGCCAA  | 0  | 14  | RDR2-sensitive |
| GGTGATCGGGCTGAACCGGCATGA  | 0  | 9   | RDR2-sensitive |
| GGTGATGCGGACGATACAGCCAGC  | 0  | 27  | RDR2-sensitive |
| GGTGATGGACAGGGCTGACGTGGC  | 0  | 18  | RDR2-sensitive |
| GGTGATGGACGTAATTGGACGGTT  | 0  | 17  | RDR2-sensitive |
| GGTGATGGCTGTAAGCGCGCGGAA  | 0  | 45  | RDR2-sensitive |
| GGTGCAATCTGTACAGTCGTCCGT  | 0  | 13  | RDR2-sensitive |
| GGTGCACCCCGGACAGAAGGCAA   | 0  | 14  | RDR2-sensitive |
| GGTGCACCGGACTGTACGGTGGTG  | 0  | 9   | RDR2-sensitive |
| GGTGCACTGGTAGAACACGGAGC   | 0  | 18  | RDR2-sensitive |
| GGTGCAGATCGATAGATGGCAGAA  | 0  | 9   | RDR2-sensitive |
| GGTGCAGGATCTAGAAGACGAAGG  | 0  | 9   | RDR2-sensitive |
| GGTGCATGCGTCGAGCAGGAACGA  | 0  | 14  | RDR2-sensitive |
| GGTGCATGTGCGCGGTACTCGGAC  | 0  | 29  | RDR2-sensitive |
| GGTGCCATGGGGTGACGCCGAA    | 17 | 0   | RDR2-resistant |
| GGTGCCGATGGGAACATGGACGGC  | 5  | 66  | RDR2-sensitive |
| GGTGCCCTCTGCCATGAATCGTCGC | 0  | 10  | RDR2-sensitive |
| GGTGCGACTCTGTTCTGGCGCGCG  | 3  | 56  | RDR2-sensitive |
| GGTGCGACTGAACCAGATGACACC  | 1  | 54  | RDR2-sensitive |
| GGTGCGAGCAGTGCTGACATCCGT  | 23 | 0   | RDR2-resistant |
| GGTGCGCCTGATCAACCGGACGAA  | 0  | 13  | RDR2-sensitive |
| GGTGCGCGGACGAACAACGACGGA  | 0  | 14  | RDR2-sensitive |
| GGTGCGGATTCTTTGCGATGGCTT  | 44 | 70  | RDR2-sensitive |
| GGTGCGGCCACGGCAGAACAACAG  | 0  | 10  | RDR2-sensitive |
| GGTGCGGCTGAACCGGAACGTGGC  | 0  | 15  | RDR2-sensitive |
| GGTGCGGGCTGCACGAGTAGATGT  | 0  | 9   | RDR2-sensitive |
| GGTGCGTCGTGGAAGTGAAGAC    | 0  | 10  | RDR2-sensitive |
| GGTGCGTGTGGACGGATTCAGAG   | 0  | 14  | RDR2-sensitive |
| GGTGCTCGGAACTAGACGGTCTGC  | 3  | 19  | RDR2-sensitive |
| GGTGCTCGGCAAATAGCTAGCTT   | 35 | 3   | RDR2-resistant |
| GGTGCTCGGCAATGTCTTCGGCTT  | 21 | 0   | RDR2-resistant |
| GGTGCTCTCTGAACAGGCGCGGAT  | 0  | 11  | RDR2-sensitive |
| GGTGCTCTCTGACCAGGCGCGGAC  | 3  | 25  | RDR2-sensitive |
| GGTGCTCTCTGATCAGGCACGGAC  | 0  | 16  | RDR2-sensitive |
| GGTGCTCTCTGCACAGACGCGGAC  | 0  | 20  | RDR2-sensitive |
| GGTGCTCTCTGCACAGGCGCGGAC  | 6  | 56  | RDR2-sensitive |
| GGTGCTCTCTGGTCAAGCGCGGAC  | 0  | 22  | RDR2-sensitive |
| GGTGCTCTCTGGTCAGACGCGGAC  | 0  | 19  | RDR2-sensitive |
| GGTGCTCTCTGGTCAGGCGCGGAC  | 14 | 298 | RDR2-sensitive |
| GGTGCTCTCTGTACAGGCGCGGAC  | 0  | 9   | RDR2-sensitive |
| GGTGCTCTGTGGAGGCGTGGACGG  | 0  | 13  | RDR2-sensitive |
| GGTGCTGTAGCCGTCGGCAATCAA  | 0  | 10  | RDR2-sensitive |
| GGTGCTGTATGCTGTTTTGATGGC  | 20 | 1   | RDR2-resistant |
| GGTGCTTTCTGCACAGGCGCGGAC  | 0  | 9   | RDR2-sensitive |
| GGTGCTTTTTCGGAGTAGGACGGT  | 0  | 9   | RDR2-sensitive |

|                          |     |    |                |
|--------------------------|-----|----|----------------|
| GGTGAAACGCGGGCGTTGACGGC  | 0   | 9  | RDR2-sensitive |
| GGTGAACTGACAGGGATGCCAG   | 0   | 27 | RDR2-sensitive |
| GGTGGAATTGTGGGCAGAGAAGCC | 0   | 10 | RDR2-sensitive |
| GGTGACACAGTCAGACAGACAAG  | 0   | 9  | RDR2-sensitive |
| GGTGACAGAAGTCAACAGATCGC  | 1   | 16 | RDR2-sensitive |
| GGTGACAGAAGTCAACAGATCGT  | 0   | 9  | RDR2-sensitive |
| GGTGACAGAGTAGGAGAGAGCAT  | 0   | 35 | RDR2-sensitive |
| GGTGACAGGTACGAGCAGATGAT  | 0   | 53 | RDR2-sensitive |
| GGTGACATGGAATTGGAGAGGAT  | 0   | 12 | RDR2-sensitive |
| GGTGACATGGATACGGGTTTGAA  | 2   | 16 | RDR2-sensitive |
| GGTGACATGTAGGGCTTATTCGG  | 0   | 9  | RDR2-sensitive |
| GGTGACCTGCAGGTGGGGCCTAT  | 3   | 27 | RDR2-sensitive |
| GGTGACCTGTAGGTGGGGCCTAT  | 1   | 38 | RDR2-sensitive |
| GGTGACCTTAGACCGTTCGGCAC  | 0   | 17 | RDR2-sensitive |
| GGTGACGATGAGCTAGACGACGT  | 0   | 19 | RDR2-sensitive |
| GGTGACGATGAGCTGGACGGCGT  | 1   | 56 | RDR2-sensitive |
| GGTGACGATGAGCTGGATGGCGT  | 1   | 44 | RDR2-sensitive |
| GGTGACTATGAACAGCTAGACGA  | 0   | 58 | RDR2-sensitive |
| GGTGACTCGTACCTCCGTGTCGT  | 0   | 15 | RDR2-sensitive |
| GGTGACTCTCTTGCCTAGGCCGG  | 0   | 14 | RDR2-sensitive |
| GGTGACTGACTGAGGACGAGGCA  | 0   | 13 | RDR2-sensitive |
| GGTGACTGGACAGCATGACGGAT  | 0   | 9  | RDR2-sensitive |
| GGTGACTGGACAGCATGATGGAT  | 2   | 20 | RDR2-sensitive |
| GGTGACTGGCACTCGGCAAAGAA  | 0   | 16 | RDR2-sensitive |
| GGTGACTGGGACGAGCACGCACC  | 0   | 13 | RDR2-sensitive |
| GGTGACTGTGCCTTATGGGTCCG  | 2   | 17 | RDR2-sensitive |
| GGTGAGACAGACAGAGGACGACT  | 0   | 11 | RDR2-sensitive |
| GGTGAGAGGTAGACGGCGCTGAC  | 6   | 37 | RDR2-sensitive |
| GGTGAGATGGCGAACGACGAGCA  | 0   | 16 | RDR2-sensitive |
| GGTGAGCGATTTGTCTGGTTAAT  | 18  | 1  | RDR2-resistant |
| GGTGAGGGAGTAGCAGCGACGAC  | 0   | 12 | RDR2-sensitive |
| GGTGAGTGGACTGTCAGCGGCCT  | 0   | 15 | RDR2-sensitive |
| GGTGAGTTGGTGGAGCAGGTCAT  | 0   | 10 | RDR2-sensitive |
| GGTGATAGAGATGACGACGCTAG  | 0   | 9  | RDR2-sensitive |
| GGTGATCTGAGACGGTAGGTTAT  | 1   | 29 | RDR2-sensitive |
| GGTGATGATGAGCTAGACGGCGT  | 0   | 12 | RDR2-sensitive |
| GGTGATGATGAGCTGGACGGCGT  | 4   | 25 | RDR2-sensitive |
| GGTGATGATGAGCTGGACGGTGT  | 2   | 22 | RDR2-sensitive |
| GGTGATGGTGGAAGTCAGTCGGC  | 0   | 9  | RDR2-sensitive |
| GGTGATTCCGATCGGATACGCAT  | 0   | 18 | RDR2-sensitive |
| GGTGCACTGTGGAGAGAAGACCA  | 0   | 10 | RDR2-sensitive |
| GGTGGCTCTGGACGCGGGACGCGA | 0   | 9  | RDR2-sensitive |
| GGTGGCTGACAGCTAGGACACGCA | 0   | 14 | RDR2-sensitive |
| GGTGGCTGTAGTTTGTGGTAAGA  | 58  | 13 | RDR2-resistant |
| GGTGGCTGTAGTTTGTGGTGAGA  | 142 | 24 | RDR2-resistant |
| GGTGGCTGTAGTTTGTGGTTAGA  | 86  | 29 | RDR2-resistant |
| GGTGGCTTAGGTAAGTGTACGGA  | 0   | 22 | RDR2-sensitive |
| GGTGGGACATAGAACGGACGGTTT | 0   | 10 | RDR2-sensitive |
| GGTGGGACGATGATCGGGAGCGGC | 0   | 9  | RDR2-sensitive |

|                           |     |    |                |
|---------------------------|-----|----|----------------|
| GGTGGGACTGGGATAGGCCGAGGC  | 1   | 19 | RDR2-sensitive |
| GGTGGGAGGAGACAGAACATGGCG  | 0   | 16 | RDR2-sensitive |
| GGTGGGCCGTATGTATGAAGACGA  | 0   | 14 | RDR2-sensitive |
| GGTGGGCTCGACCGAGATGGACAT  | 0   | 13 | RDR2-sensitive |
| GGTGGGCTGGCACGAAGCACGCAA  | 0   | 13 | RDR2-sensitive |
| GGTGGGCTGGTTGAGGAGTTGGGC  | 0   | 16 | RDR2-sensitive |
| GGTGGGCTGTATGCATGGAGACGA  | 0   | 13 | RDR2-sensitive |
| GGTGGGCTGTATGTATGGAGACGA  | 1   | 28 | RDR2-sensitive |
| GGTGGGCTGTGCCTTATGGGTCGG  | 0   | 12 | RDR2-sensitive |
| GGTGGGGAACGTAGACGATACGG   | 0   | 11 | RDR2-sensitive |
| GGTGGGGACATGGGCAGTGGGACG  | 0   | 10 | RDR2-sensitive |
| GGTGGGGACGCTGAGAACGCGGAC  | 0   | 12 | RDR2-sensitive |
| GGTGGGGCTGACTGTCGTATGGTG  | 1   | 14 | RDR2-sensitive |
| GGTGGGTCTGGTCGGACGACGCGC  | 6   | 58 | RDR2-sensitive |
| GGTGGTACTCTCTGCGCAGGGGCG  | 2   | 17 | RDR2-sensitive |
| GGTGGTCACTGTCAGGGAGGGCGT  | 0   | 10 | RDR2-sensitive |
| GGTGGTCTGGGCTGCCTCGGCTGC  | 0   | 21 | RDR2-sensitive |
| GGTGGTCTGTGGCATGTGGGACGG  | 1   | 19 | RDR2-sensitive |
| GGTGGTGAAGACTCCGAAGATCGT  | 0   | 9  | RDR2-sensitive |
| GGTGGTGACAGTATGACACGACGG  | 0   | 12 | RDR2-sensitive |
| GGTGGTTGATGGATAAGTTGGATC  | 53  | 0  | RDR2-resistant |
| GGTGTAATAGCTCTAGAGACGTC   | 0   | 10 | RDR2-sensitive |
| GGTGTAACATTCGGGCTGCACGGCT | 0   | 10 | RDR2-sensitive |
| GGTGTAACATTGGACTGTCCGGTG  | 1   | 14 | RDR2-sensitive |
| GGTGTAACCTAATGAGCTGGACGC  | 173 | 27 | RDR2-resistant |
| GGTGTAGACCACGAGCTCCGACGT  | 7   | 53 | RDR2-sensitive |
| GGTGTAGAGGGCATACTGAATGAA  | 0   | 10 | RDR2-sensitive |
| GGTGTAGATCGATGGATGGCAGAA  | 0   | 9  | RDR2-sensitive |
| GGTGTAGATTGGCTGAAGGCAGAA  | 0   | 40 | RDR2-sensitive |
| GGTGTAGCGGAGTAGTAGACCGGC  | 0   | 15 | RDR2-sensitive |
| GGTGTAGGAGTAGATCACAGGCGT  | 1   | 14 | RDR2-sensitive |
| GGTGTAGGATCTCGAAGGCCACAG  | 0   | 9  | RDR2-sensitive |
| GGTGTAGGATGCGATGGTAGAGGC  | 170 | 2  | RDR2-resistant |
| GGTGTAGTCTCTCCAAGTGGCTGG  | 0   | 20 | RDR2-sensitive |
| GGTGATGAGCCTCTGGTCGACGA   | 0   | 12 | RDR2-sensitive |
| GGTGATGCGGCTCGCTCTGCCAA   | 3   | 34 | RDR2-sensitive |
| GGTGCACTGAACTCAGAGAGGTC   | 0   | 15 | RDR2-sensitive |
| GGTGCACTGTAAACCTACGGCAA   | 0   | 9  | RDR2-sensitive |
| GGTGTCAGACCAACGGCTAGGCGC  | 0   | 13 | RDR2-sensitive |
| GGTGTCAGATCGACGGCAACATAC  | 0   | 10 | RDR2-sensitive |
| GGTGTCGAACGTAGTTAATGCGGC  | 1   | 67 | RDR2-sensitive |
| GGTGTCGACCTCGGGCGAGACGGA  | 0   | 10 | RDR2-sensitive |
| GGTGTCGACTATGCCAGCCGCGGT  | 1   | 12 | RDR2-sensitive |
| GGTGTCGACTTCGGGCGTGGCGGA  | 0   | 14 | RDR2-sensitive |
| GGTGTCGGCATCGGCATAGCCCGA  | 0   | 14 | RDR2-sensitive |
| GGTGTCGGGGTGCATACAAAGCAC  | 2   | 17 | RDR2-sensitive |
| GGTGTCGGGGTGCATACAAAGCAT  | 0   | 14 | RDR2-sensitive |
| GGTGTCGTCGTGTAGTTGGTTATC  | 42  | 2  | RDR2-resistant |
| GGTGTCGTTGGTGTAGTTGGTTATC | 385 | 32 | RDR2-resistant |

|                           |    |     |                |
|---------------------------|----|-----|----------------|
| GGTGTCTGTTGAATGCAAGATGGAT | 3  | 22  | RDR2-sensitive |
| GGTGTCTGTTGTGTAGTTGGTTATC | 60 | 1   | RDR2-resistant |
| GGTGTCTCCGTTGGGCCGACGTCT  | 0  | 10  | RDR2-sensitive |
| GGTGTCTGTAGCACGGTTGGTAT   | 0  | 10  | RDR2-sensitive |
| GGTGTGAGCTGTGACGGCTGAGTT  | 72 | 7   | RDR2-resistant |
| GGTGTGATCTCAGGCAGGACAGGC  | 0  | 9   | RDR2-sensitive |
| GGTGTGATCTGGATTGACGTGGCA  | 0  | 9   | RDR2-sensitive |
| GGTGTGATCTTTAGAACCGGCCAT  | 1  | 48  | RDR2-sensitive |
| GGTGTGCACTGTAGCGACGGTGGT  | 0  | 25  | RDR2-sensitive |
| GGTGTGCCGGATTGGACGGCTGAG  | 1  | 29  | RDR2-sensitive |
| GGTGTGCTGTAGTAGTGGGCACGG  | 0  | 15  | RDR2-sensitive |
| GGTGTGGAAGCGACAGAACATGGC  | 0  | 21  | RDR2-sensitive |
| GGTGTGGAGCGGTAGAATGGACGG  | 0  | 14  | RDR2-sensitive |
| GGTGTGTACAAAGGGCAGGGACGT  | 75 | 24  | RDR2-resistant |
| GGTGTGTAGAGCAAGGGTGAGTAC  | 0  | 9   | RDR2-sensitive |
| GGTGTGTCTCAAGGTCGCCGGGTC  | 0  | 9   | RDR2-sensitive |
| GGTGTGTTTGGTTGGAGAGCGGAT  | 0  | 17  | RDR2-sensitive |
| GGTGTCTGGAACGGGCTCGACGA   | 0  | 12  | RDR2-sensitive |
| GGTGTGCTAGTAGAACGGACGGA   | 0  | 24  | RDR2-sensitive |
| GGTGTGGACGAATACGGGGAGGA   | 0  | 9   | RDR2-sensitive |
| GGTGTGGGGTGCTGGGTAGGCGTA  | 0  | 9   | RDR2-sensitive |
| GGTGTCTTAGGAGTAGGACGGTG   | 19 | 1   | RDR2-resistant |
| GGTGTCTTAGAACTGTCGGCAC    | 0  | 10  | RDR2-sensitive |
| GGTGTCTTAGGAGTAGGACGGTAT  | 0  | 19  | RDR2-sensitive |
| GGTGTCTTAGGAGTAGGACGGTGT  | 6  | 203 | RDR2-sensitive |
| GGTGTCTTTTCGGACCTTCGGCAT  | 0  | 9   | RDR2-sensitive |
| GGTGTCTTTTCGGACCTTCGGCGT  | 1  | 15  | RDR2-sensitive |
| GGTTAATAATCGTGTCCGGCCGGC  | 0  | 10  | RDR2-sensitive |
| GGTTAATCGTTGGCGTGTCCCGGT  | 0  | 31  | RDR2-sensitive |
| GGTTACCAGCTGAGAATTAGGCGT  | 10 | 53  | RDR2-sensitive |
| GGTTACCTGCAAACGGTCTCTGA   | 0  | 10  | RDR2-sensitive |
| GGTTACCTGGACGGAGATTTGAGC  | 0  | 12  | RDR2-sensitive |
| GGTTACTGGATCAAGGAGGACGTT  | 0  | 18  | RDR2-sensitive |
| GGTTACTGTTATTGATCGGCTCCA  | 21 | 1   | RDR2-resistant |
| GGTTAGATTCGTGTCCGGACCGGC  | 0  | 13  | RDR2-sensitive |
| GGTTAGTTCGGTCCGGTTCTCGG   | 0  | 30  | RDR2-sensitive |
| GGTTATCACACAGGGTCGTCTCGT  | 0  | 10  | RDR2-sensitive |
| GGTTATCGGGCTGAACCATGCCGG  | 0  | 30  | RDR2-sensitive |
| GGTTATGTGACTGATTATGGTGGT  | 49 | 2   | RDR2-resistant |
| GGTTCAACGTGAGGACGGTACGGA  | 0  | 9   | RDR2-sensitive |
| GGTTCAGGACTTATTTCCGACGGT  | 7  | 64  | RDR2-sensitive |
| GGTTCAGTATCGTGTCCGGCCGGC  | 0  | 17  | RDR2-sensitive |
| GGTTCAGTCTGTCCGCCGGACACA  | 0  | 10  | RDR2-sensitive |
| GGTTCACGTCCGGCAACACGTCAT  | 0  | 12  | RDR2-sensitive |
| GGTTCATGGCAGTGTAGGACGG    | 0  | 34  | RDR2-sensitive |
| GGTTCCTACAGGAGAGGATCGTGC  | 24 | 0   | RDR2-resistant |
| GGTTCGAAGGTGGGACTAGGTCGG  | 0  | 9   | RDR2-sensitive |
| GGTTCGACGGATCTGATTGGGGGC  | 0  | 9   | RDR2-sensitive |
| GGTTCGCAACTCTGGATCGGACGG  | 0  | 16  | RDR2-sensitive |

|                          |    |     |                |
|--------------------------|----|-----|----------------|
| GGTTCGCGACTCTAGGCTAGACGA | 0  | 11  | RDR2-sensitive |
| GGTTCGCGGCTCTGGACTGGACGG | 1  | 20  | RDR2-sensitive |
| GGTTCGGAATAGTCGGGAACGGAT | 0  | 9   | RDR2-sensitive |
| GGTTCGGACGCTACAGGTAGAGGC | 0  | 12  | RDR2-sensitive |
| GGTTCGGCACCACAGATCTTGCA  | 2  | 20  | RDR2-sensitive |
| GGTTCGGTACGGTTCGGTTCGGTT | 0  | 9   | RDR2-sensitive |
| GGTTCGGTCTGGGTGAAGCGTCAC | 0  | 16  | RDR2-sensitive |
| GGTTCGGTCTTGATTGGTTCGGT  | 0  | 18  | RDR2-sensitive |
| GGTTCTCGGATTGGATCGGTATGG | 0  | 14  | RDR2-sensitive |
| GGTTCTCGGTTATTCGGTTCGGT  | 0  | 9   | RDR2-sensitive |
| GGTTCTGGCTCGAGCGGATTGCAG | 0  | 10  | RDR2-sensitive |
| GGTTCTGGTTCTGGCTCGAGCGGA | 1  | 25  | RDR2-sensitive |
| GGTTCTGGTTCTGGCTCGGGCGGA | 0  | 9   | RDR2-sensitive |
| GGTTCTTCGGTTCGGTTCCTCGGT | 0  | 14  | RDR2-sensitive |
| GGTTGAAGAGCCAAGTAGAACGGA | 2  | 40  | RDR2-sensitive |
| GGTTGAATTCAGGCTGACTCGGT  | 0  | 16  | RDR2-sensitive |
| GGTTGACACGGAATGGAAGATCGG | 0  | 10  | RDR2-sensitive |
| GGTTGACGGAGATACTAGAGCCAC | 1  | 15  | RDR2-sensitive |
| GGTTGACGGAGATACTAGAGCCGC | 3  | 79  | RDR2-sensitive |
| GGTTGACTGTACATGGTAGACGCA | 0  | 35  | RDR2-sensitive |
| GGTTGACTGTACGCAAGGAACGGT | 0  | 36  | RDR2-sensitive |
| GGTTGACTGTACGCGAGAAACGGT | 0  | 24  | RDR2-sensitive |
| GGTTGACTGTACGTGATAGACGCA | 0  | 65  | RDR2-sensitive |
| GGTTGACTGTACGTGGTAGATGCA | 0  | 16  | RDR2-sensitive |
| GGTTGACTGTACGTGTTAGACGCA | 0  | 13  | RDR2-sensitive |
| GGTTGACTTAGAATCGATAGGCAT | 0  | 9   | RDR2-sensitive |
| GGTTGAGACTAGGACGGTATCTGA | 2  | 29  | RDR2-sensitive |
| GGTTGAGATCGTAGAACGGCAGAA | 0  | 16  | RDR2-sensitive |
| GGTTGAGATTGCAGAACGGTAGGC | 0  | 14  | RDR2-sensitive |
| GGTTGAGATTGCAGGATGGCAGAA | 0  | 24  | RDR2-sensitive |
| GGTTGAGGAGCCAAGTAGAACGAA | 0  | 24  | RDR2-sensitive |
| GGTTGAGGAGCCAAGTAGAACGGA | 8  | 687 | RDR2-sensitive |
| GGTTGAGGAGCCAAGTAGAACGGT | 0  | 9   | RDR2-sensitive |
| GGTTGAGGAGCCAAGTAGAATGGA | 1  | 19  | RDR2-sensitive |
| GGTTGAGGAGCCGAGTAGAACGGA | 0  | 11  | RDR2-sensitive |
| GGTTGAGGAGTCAAGTAGAACGGA | 0  | 9   | RDR2-sensitive |
| GGTTGAGGATCTAGACGACTATTA | 21 | 0   | RDR2-resistant |
| GGTTGATTGTATGGGTAAGACGAG | 0  | 12  | RDR2-sensitive |
| GGTTGCAATGACAGGACGAGACGG | 0  | 11  | RDR2-sensitive |
| GGTTGCAATGACAGGACGGGACGG | 0  | 34  | RDR2-sensitive |
| GGTTGCAATGACAGGACGGGATGG | 0  | 21  | RDR2-sensitive |
| GGTTGCAATGATAGGACGGGACGG | 1  | 21  | RDR2-sensitive |
| GGTTGCAGAGTGAACGGAACAGAG | 1  | 20  | RDR2-sensitive |
| GGTTGCAGAGTGAACGGAACGGAA | 1  | 13  | RDR2-sensitive |
| GGTTGCAGAGTGAACGGAACGGAG | 11 | 84  | RDR2-sensitive |
| GGTTGCAGAGTGAATGGAACGGAG | 0  | 10  | RDR2-sensitive |
| GGTTGCAGATTGAACGGAACGGAG | 0  | 11  | RDR2-sensitive |
| GGTTGCATTGTAGTAGATCGACGG | 1  | 24  | RDR2-sensitive |
| GGTTGCCGGATAAGCAGAACCAGG | 0  | 11  | RDR2-sensitive |

|                           |    |    |                |
|---------------------------|----|----|----------------|
| GGTTGCCGTAGACTGTGATGGCGC  | 0  | 9  | RDR2-sensitive |
| GGTTGCCTATGGGGCCGTCGGACA  | 1  | 13 | RDR2-sensitive |
| GGTTGCCTGCTTGTGGATGGACGT  | 0  | 18 | RDR2-sensitive |
| GGTTGCCTGTACGTGAGGAACGGT  | 0  | 10 | RDR2-sensitive |
| GGTTGCGGGACAAGATAGGGACGT  | 0  | 19 | RDR2-sensitive |
| GGTTGCGGGAGGCAGAACGTGCAC  | 0  | 9  | RDR2-sensitive |
| GGTTGCGGGTCAGGACGAGATGGA  | 0  | 11 | RDR2-sensitive |
| GGTTGCTCGGATAGCTACACCCAG  | 0  | 9  | RDR2-sensitive |
| GGTTGCTTGTACGGACTTGGTCGG  | 0  | 10 | RDR2-sensitive |
| GGTTGGACGGACGAACATAGGTAT  | 0  | 9  | RDR2-sensitive |
| GGTTGGAGAGCCAAGTAGAACGGA  | 0  | 27 | RDR2-sensitive |
| GGTTGGATGGTCGAGGTGGGATGG  | 0  | 11 | RDR2-sensitive |
| GGTTGGATTGGGACATCAACACGG  | 0  | 9  | RDR2-sensitive |
| GGTTGGCTCGGACCTGGCACATAG  | 0  | 12 | RDR2-sensitive |
| GGTTGGCTGCAGAGCAGGAGGACA  | 0  | 15 | RDR2-sensitive |
| GGTTGGGTGTGGGATGGATATCAA  | 0  | 17 | RDR2-sensitive |
| GGTTGGTCAGGAGTCGAGACGTCG  | 45 | 0  | RDR2-resistant |
| GGTTGGTCGTACGAAGAGGGACGG  | 0  | 15 | RDR2-sensitive |
| GGTTGGTCTTGACAAGGCGTGGT   | 0  | 11 | RDR2-sensitive |
| GGTTGTAACGGGCTGTGTCGGTC   | 0  | 14 | RDR2-sensitive |
| GGTTGTAATGACAGAACGGGACGA  | 0  | 11 | RDR2-sensitive |
| GGTTGTAGGACTGCAGAAAGACGT  | 1  | 54 | RDR2-sensitive |
| GGTTGTATGACGCCATGTAGACGC  | 0  | 17 | RDR2-sensitive |
| GGTTGTCAGACGGACCGGAAATAC  | 0  | 15 | RDR2-sensitive |
| GGTTGTCGAGCGAACGAAGTGGTT  | 0  | 10 | RDR2-sensitive |
| GGTTGTCGGCGAAGTTGAAGGCGC  | 0  | 21 | RDR2-sensitive |
| GGTTGTCTGCATCTGGAAGACGTG  | 0  | 13 | RDR2-sensitive |
| GGTTGTCTGTGTGTAGATGCGGAG  | 0  | 10 | RDR2-sensitive |
| GGTTGTCTTGACCGTCGGATATA   | 0  | 10 | RDR2-sensitive |
| GGTTGTGAGTCAAGGCTGAGACGG  | 0  | 51 | RDR2-sensitive |
| GGTTGTGGACAGCTAGGACGGGA   | 1  | 47 | RDR2-sensitive |
| GGTTGTGTGGAGGAGGTGCTGGTT  | 84 | 6  | RDR2-resistant |
| GGTTGTGTGGTGTGGATGGCTCAT  | 0  | 9  | RDR2-sensitive |
| GGTTGTTACGGATTGATGGGTCGG  | 0  | 13 | RDR2-sensitive |
| GGTTGTTCTCGGACGAGTCGTGGC  | 0  | 13 | RDR2-sensitive |
| GGTTGTTGGAGCGGTAGCGGATGT  | 0  | 9  | RDR2-sensitive |
| GGTTGTTGTA CTGTGGACCGGCAT | 0  | 9  | RDR2-sensitive |
| GGTTGTTGTGTGGCTATAGACGGT  | 71 | 4  | RDR2-resistant |
| GGTTGTTTGCCGGACGGCTAGATC  | 1  | 12 | RDR2-sensitive |
| GGTTGTTTGTTGACTGCACGTAA   | 0  | 13 | RDR2-sensitive |
| GGTTTACTGGTCTGGTCAACTAC   | 0  | 9  | RDR2-sensitive |
| GGTTTAGGGCTTATTCCCGTCGGT  | 0  | 9  | RDR2-sensitive |
| GGTTTATGGACATGTATCTTCGGA  | 0  | 12 | RDR2-sensitive |
| GGTTTATTATAGTTGGATAACTGA  | 81 | 0  | RDR2-resistant |
| GGTTTCCTATGGGGCCGTCGGACA  | 1  | 16 | RDR2-sensitive |
| GGTTTCGTTCCGTTCCGCTCGGAC  | 0  | 12 | RDR2-sensitive |
| GGTTTCGTCTGTAGTTGGTTATC   | 14 | 0  | RDR2-resistant |
| GGTTTCGTGGTGTAGTTGGTTATC  | 33 | 1  | RDR2-resistant |
| GGTTTGGACTTCCAGCAGCTCGGC  | 0  | 13 | RDR2-sensitive |

|                           |    |     |                |
|---------------------------|----|-----|----------------|
| GGTTTGGTCGTAGCACGAACGGTG  | 0  | 12  | RDR2-sensitive |
| GGTTTGTGGCCTAGGACCAGATGA  | 0  | 11  | RDR2-sensitive |
| GGTTTTATCGTGCCTATGGACTAA  | 1  | 52  | RDR2-sensitive |
| GGTTTTCTTAGTGGGCTGGGTCGG  | 1  | 30  | RDR2-sensitive |
| GGTTTTGTGAAGATATCGGCTAGT  | 83 | 4   | RDR2-resistant |
| GTAAAAGACATCGGCTCCGGCAGA  | 0  | 10  | RDR2-sensitive |
| GTAAAAGACGGATATAGAGGATGT  | 0  | 12  | RDR2-sensitive |
| GTAAAATGGACGGTTGGATGGGTC  | 0  | 10  | RDR2-sensitive |
| GTAAACGGACTAACAGGACGGGGT  | 0  | 18  | RDR2-sensitive |
| GTAAACTCTTTTTAGATTGTCCGT  | 0  | 10  | RDR2-sensitive |
| GTAAAGGACGGATATAGAGGATGT  | 2  | 26  | RDR2-sensitive |
| GTAAAGTGGGAGGTGATCGTCTGT  | 0  | 10  | RDR2-sensitive |
| GTAAATATGACTGCGGAAGATTGT  | 0  | 9   | RDR2-sensitive |
| GTAAATTGTCGCCGCGTGCCCCAG  | 0  | 13  | RDR2-sensitive |
| GTAAATTGTCGTCGCGTGCCCCAG  | 0  | 9   | RDR2-sensitive |
| GTAACAACGACTGCGGATCGGCTA  | 34 | 0   | RDR2-resistant |
| GTAACAATCTCGTCGCGCGGCTTC  | 0  | 13  | RDR2-sensitive |
| GTAACACTCGGCAAAGAAGGCTCG  | 0  | 10  | RDR2-sensitive |
| GTAACACTCGGCAAAGAGGCTCTT  | 0  | 15  | RDR2-sensitive |
| GTAACACTCTCGTCGCGCGGCTTC  | 0  | 10  | RDR2-sensitive |
| GTAACAGGCCGCGGAGGACGACGT  | 0  | 14  | RDR2-sensitive |
| GTAACATCGGGTCGGATTCGGATA  | 0  | 10  | RDR2-sensitive |
| GTAACATTCGCCGGATGCATGTGC  | 14 | 0   | RDR2-resistant |
| GTAACATTGACTGTAGATGTGCAT  | 0  | 11  | RDR2-sensitive |
| GTAACCCCTTGGTGAAGATGTCGG  | 0  | 11  | RDR2-sensitive |
| GTAACCCCTGTGATGCGTAGTCGGA | 0  | 13  | RDR2-sensitive |
| GTAACCCCTGTCTCTGACGGCTGA  | 0  | 9   | RDR2-sensitive |
| GTAACGCGGCATGACATACCTGGA  | 0  | 10  | RDR2-sensitive |
| GTAACGGGCTTCGGGCTAAACGGG  | 0  | 9   | RDR2-sensitive |
| GTAACGTTGGCTCTTGACGGACAT  | 0  | 185 | RDR2-sensitive |
| GTAACGTTGGCTGTTGACGGACAT  | 0  | 9   | RDR2-sensitive |
| GTAAGTAGAACGGAGTGGCTCCAA  | 1  | 24  | RDR2-sensitive |
| GTAAGTCCGGATGTATGTTGGTTAC | 28 | 1   | RDR2-resistant |
| GTAAGTCCGGGAGTGGACGGGGCAC | 0  | 11  | RDR2-sensitive |
| GTAAGACATGTGGGGCCAGTGGCA  | 0  | 10  | RDR2-sensitive |
| GTAAGACTGGCATGTAGGCGACAT  | 0  | 9   | RDR2-sensitive |
| GTAAGAGGCTGCAAACCACTCGGT  | 1  | 17  | RDR2-sensitive |
| GTAAGGTGTGTTGGGCGCAAACGG  | 1  | 31  | RDR2-sensitive |
| GTAAGTACTGTGACGGAACCTCCC  | 0  | 12  | RDR2-sensitive |
| GTAAGTCCGGCATACTCGTCAG    | 0  | 14  | RDR2-sensitive |
| GTAAGTCGTCGCAACGCACGGGCA  | 1  | 22  | RDR2-sensitive |
| GTAATACGACAGGACGCGGACCAA  | 0  | 10  | RDR2-sensitive |
| GTAATCGGAGGAGACATAGGGCAT  | 0  | 23  | RDR2-sensitive |
| GTAATCGGATCGAATACGGACGGA  | 0  | 9   | RDR2-sensitive |
| GTAATCTGGAACGGAGCGGCTCTG  | 0  | 19  | RDR2-sensitive |
| GTAATGGATCTGTCTCGTTTGGAC  | 0  | 9   | RDR2-sensitive |
| GTAATGGGCGCTGTAGGGGGCACC  | 0  | 19  | RDR2-sensitive |
| GTAATGGGTTGTATATGGTTGACA  | 28 | 0   | RDR2-resistant |
| GTAATTGGACTTTCGGTATTATAA  | 0  | 11  | RDR2-sensitive |

|                           |    |    |                |
|---------------------------|----|----|----------------|
| GTAATTGTGTGTCTGGGCCGGTAC  | 0  | 11 | RDR2-sensitive |
| GTACAACGGTAGAATGGACGACTG  | 0  | 9  | RDR2-sensitive |
| GTACAATCGACTGTTGATGGGCAT  | 0  | 12 | RDR2-sensitive |
| GTACACAGCCGTCGGAGATAAGGC  | 0  | 22 | RDR2-sensitive |
| GTACACAGTTGGAACACTCGGCAA  | 0  | 9  | RDR2-sensitive |
| GTACACCGTTGGATATTGGATGGA  | 0  | 12 | RDR2-sensitive |
| GTACACGCGGCTGTAGGTAAGGCT  | 1  | 14 | RDR2-sensitive |
| GTACACTACACATGGTCGGACGGT  | 0  | 10 | RDR2-sensitive |
| GTACAGACGCTGGATCCTCGGTAT  | 0  | 11 | RDR2-sensitive |
| GTACAGCGCGATGGCAGAACCAAA  | 0  | 9  | RDR2-sensitive |
| GTACAGCGGCAATAGAGCAAGGCA  | 0  | 11 | RDR2-sensitive |
| GTACAGGAGGGCTGAGGGCGTGCT  | 0  | 9  | RDR2-sensitive |
| GTACAGGCGAGTAGCGTGCGGACA  | 0  | 9  | RDR2-sensitive |
| GTACAGGGCCTCGGATTTTGTCCG  | 0  | 11 | RDR2-sensitive |
| GTACAGTAGGAAGTGAGGCGTCTG  | 3  | 21 | RDR2-sensitive |
| GTACAGTGGGAAGTGAGGCGTCTG  | 4  | 18 | RDR2-sensitive |
| GTACAGTTGGACCATCTACAGCAG  | 0  | 11 | RDR2-sensitive |
| GTACATGTAGATGATTGGTAGTAT  | 0  | 10 | RDR2-sensitive |
| GTACATGTAGGACCGATAAGGCCGA | 3  | 18 | RDR2-sensitive |
| GTACCAGGTCGCGGACCGTCCGGC  | 5  | 33 | RDR2-sensitive |
| GTACCAGGTCGCGGACTGTCCGGC  | 0  | 22 | RDR2-sensitive |
| GTACCATCGAGTTGCGATTGTCCG  | 1  | 32 | RDR2-sensitive |
| GTACCATTGGACTGTCCGGTGTGC  | 0  | 24 | RDR2-sensitive |
| GTACCCCTGTAGATGGTATGGCTT  | 0  | 14 | RDR2-sensitive |
| GTACCCGATAGATCGCAGCCGGAT  | 0  | 13 | RDR2-sensitive |
| GTACCCCTCGGACTAAAGTCGGCAT | 4  | 45 | RDR2-sensitive |
| GTACCGAGCTTGACTGCGGCGTA   | 0  | 34 | RDR2-sensitive |
| GTACCGGAATGAGGCAGGATTCAT  | 0  | 15 | RDR2-sensitive |
| GTACCGGGCGTAGAAGATGCGGCC  | 0  | 9  | RDR2-sensitive |
| GTACCGTTGGATGTAGATGGTGTG  | 0  | 63 | RDR2-sensitive |
| GTACCTACCTGTCCGATTGGTCCG  | 0  | 44 | RDR2-sensitive |
| GTACCTATCGTTGTATTGGTCCGG  | 0  | 9  | RDR2-sensitive |
| GTACCTATTTCTGATCGTTATGGT  | 0  | 9  | RDR2-sensitive |
| GTACCTCCTTGCTCTTGTCCGTCGT | 0  | 16 | RDR2-sensitive |
| GTACCTCGAGACGACGACATGAAT  | 0  | 15 | RDR2-sensitive |
| GTACCTGGGGTGTAGAAGGCAGGC  | 0  | 23 | RDR2-sensitive |
| GTACCTGGTAGACACGTCCGACGAA | 0  | 66 | RDR2-sensitive |
| GTACCTGTAGTACTTGTGCAGATT  | 31 | 3  | RDR2-resistant |
| GTACCTGTGACTGTAGCTTCGGCT  | 0  | 11 | RDR2-sensitive |
| GTACCTTCATACTGTAGTAACGGA  | 0  | 14 | RDR2-sensitive |
| GTACCTTCGGACTAAAGTTGGCAT  | 5  | 50 | RDR2-sensitive |
| GTACCTTCGGACTCAAGTCGGTAT  | 0  | 37 | RDR2-sensitive |
| GTACCTTCGGACTCAAGTTGGTAT  | 0  | 12 | RDR2-sensitive |
| GTACGAAGTCGGTGCAGGAAGATG  | 4  | 44 | RDR2-sensitive |
| GTACGAATAAGCGGGCCGGATCTC  | 0  | 14 | RDR2-sensitive |
| GTACGACACTGGTAGCGAAGACAT  | 0  | 10 | RDR2-sensitive |
| GTACGACGTAGGCTGAACCGGTAT  | 0  | 12 | RDR2-sensitive |
| GTACGACGTGGTAGACGGGCTGCT  | 0  | 18 | RDR2-sensitive |
| GTACGAGCAGATGATGGAGGACAA  | 0  | 12 | RDR2-sensitive |



|                           |    |    |                |
|---------------------------|----|----|----------------|
| GTACGAGCAGCTGGGTTGGAGGAA  | 17 | 1  | RDR2-resistant |
| GTACGAGCGAGAACCTGTGCGGTA  | 0  | 12 | RDR2-sensitive |
| GTACGAGGACGCAACAGATCAGAA  | 0  | 14 | RDR2-sensitive |
| GTACGATTTTATGCTTGAACACGG  | 2  | 14 | RDR2-sensitive |
| GTACGCACGGACTATTCGCGGCTC  | 1  | 42 | RDR2-sensitive |
| GTACGCAGACAGAACATGACGCAT  | 0  | 26 | RDR2-sensitive |
| GTACGCATCGAGGACTGCGGCCAG  | 0  | 10 | RDR2-sensitive |
| GTACGCGAGGAACGATGGCTGCAC  | 0  | 12 | RDR2-sensitive |
| GTACGCGCACAGCAAGACTCTCGA  | 0  | 9  | RDR2-sensitive |
| GTACGCGGCTCTAGACCGGACGGT  | 0  | 21 | RDR2-sensitive |
| GTACGCGGTGGGAGAGATGAGGGC  | 21 | 0  | RDR2-resistant |
| GTACGCTGTTAGAACGCCGGTGTG  | 0  | 9  | RDR2-sensitive |
| GTACGGAGGCAGAACGCGGCTCGG  | 0  | 21 | RDR2-sensitive |
| GTACGGAGTGAGAACAGAGGCCGG  | 0  | 9  | RDR2-sensitive |
| GTACGGAGTGTAGGCGTCCAACGG  | 0  | 9  | RDR2-sensitive |
| GTACGGATCAGCCGGCAGCGACAG  | 0  | 9  | RDR2-sensitive |
| GTACGGATCGTTTTAGGGTTTCAC  | 0  | 18 | RDR2-sensitive |
| GTACGGCTATAATTCACCGGACTG  | 6  | 37 | RDR2-sensitive |
| GTACGGGCAACTTCAGAGACACAT  | 1  | 13 | RDR2-sensitive |
| GTACGGGCCGACAGCATGGACGAG  | 0  | 23 | RDR2-sensitive |
| GTACGGGTGTAGAGTGTAGACGCC  | 0  | 12 | RDR2-sensitive |
| GTACGGTACACGCAGGGCCTCGGT  | 0  | 9  | RDR2-sensitive |
| GTACGGTAGACGAAGGGACGACAG  | 0  | 14 | RDR2-sensitive |
| GTACGGTCAGAGTAGCAGGCTGGA  | 0  | 26 | RDR2-sensitive |
| GTACGTAGCGGGAGTGTTTGACAG  | 23 | 3  | RDR2-resistant |
| GTACGTCAGAGGAACCGGCTCCGA  | 0  | 18 | RDR2-sensitive |
| GTACGTCCTGTGGAAGAAGCGGCG  | 0  | 12 | RDR2-sensitive |
| GTACGTCGAGCGCAGGAACGGGAA  | 0  | 17 | RDR2-sensitive |
| GTACGTCGTGTGTAGAGATGGCAA  | 1  | 26 | RDR2-sensitive |
| GTACGTGAATTGCTGATCCTGGCA  | 0  | 18 | RDR2-sensitive |
| GTACGTGAGGAACGGTGTCTGCAT  | 0  | 13 | RDR2-sensitive |
| GTACGTGAGGACATTGCAGAACGG  | 0  | 11 | RDR2-sensitive |
| GTACGTGAGTTCTGATCCTGGCAC  | 0  | 22 | RDR2-sensitive |
| GTACGTGCACATGTAGATCGGTAT  | 0  | 77 | RDR2-sensitive |
| GTACGTGCTGATGGAACCCGGCAT  | 0  | 9  | RDR2-sensitive |
| GTACGTGGCTAGGGATTGAGGGCA  | 2  | 30 | RDR2-sensitive |
| GTACGTGGGCTTTCTGTACGGCAT  | 52 | 12 | RDR2-resistant |
| GTACGTGTCGGCAAGCGAGAGGAA  | 0  | 9  | RDR2-sensitive |
| GTACGTGTCGGCAAGCGAGAGGAC  | 0  | 10 | RDR2-sensitive |
| GTACGTTTGACCTGATGCTCGGC   | 0  | 10 | RDR2-sensitive |
| GTACTACGACGGCAGCCAAAACCTC | 0  | 9  | RDR2-sensitive |
| GTACTACTGTTTTTTGGACGGCCG  | 0  | 17 | RDR2-sensitive |
| GTACTAGTGGACGTGCTCGTCGGC  | 0  | 13 | RDR2-sensitive |
| GTACTCCCTTAGCGCATTGTCGGT  | 0  | 9  | RDR2-sensitive |
| GTACTCGGGCTGCGTCGAGGCGTC  | 1  | 22 | RDR2-sensitive |
| GTACTCTAATGAGCTGGACGCACT  | 31 | 3  | RDR2-resistant |
| GTACTCTCGGACTAAAGTCGGCAT  | 0  | 38 | RDR2-sensitive |
| GTACTCTGCCTGTTGACGCAACAC  | 0  | 10 | RDR2-sensitive |
| GTACTCTGGTCGTCTAACAAGGTA  | 0  | 25 | RDR2-sensitive |

|                           |     |     |                |
|---------------------------|-----|-----|----------------|
| GTACTGAACCGCCTGGGACGTCAC  | 0   | 21  | RDR2-sensitive |
| GTACTGAGGCATGAGCGTGATGGC  | 28  | 0   | RDR2-resistant |
| GTACTGGAGACTCCTACAGAAGAT  | 0   | 10  | RDR2-sensitive |
| GTACTGGCCTGCTTCAGACGACTC  | 0   | 20  | RDR2-sensitive |
| GTACTGGGACTAGAGGACGACGAA  | 0   | 11  | RDR2-sensitive |
| GTACTGTACTGTTTAGACGATGGA  | 0   | 16  | RDR2-sensitive |
| GTACTGTAGACTGTTGTCCGGCGTT | 0   | 17  | RDR2-sensitive |
| GTACTGTAGAGTGTCCGGTGCGCC  | 1   | 38  | RDR2-sensitive |
| GTACTGTAGATAATAGGCTGTTTA  | 0   | 12  | RDR2-sensitive |
| GTACTGTAGCACCGGTAGGAGCAA  | 0   | 10  | RDR2-sensitive |
| GTACTGTAGCACCGGTAGGGGCAA  | 0   | 10  | RDR2-sensitive |
| GTACTGTAGCGTCCCTGTCGGCGT  | 0   | 34  | RDR2-sensitive |
| GTACTGTATCGAATTATTAGGCCA  | 0   | 35  | RDR2-sensitive |
| GTACTGTGGACGCCTACACTGCGT  | 0   | 12  | RDR2-sensitive |
| GTACTGTTACGCGGACTTGGCAT   | 2   | 34  | RDR2-sensitive |
| GTACTGTTACGCTGACTTGGCAT   | 41  | 378 | RDR2-sensitive |
| GTACTGTTGGAGTGAATGAAGATG  | 0   | 25  | RDR2-sensitive |
| GTACTGTTGGTTTTGTCCGGCGTT  | 0   | 9   | RDR2-sensitive |
| GTACTTAACTTAAGTTCGTCGGTA  | 0   | 9   | RDR2-sensitive |
| GTACTTCTGGATACGGGTCCGATA  | 0   | 9   | RDR2-sensitive |
| GTACTTTCTGAACGCTAGAGTGCC  | 0   | 11  | RDR2-sensitive |
| GTACTTTTTCTCGGGCACTCGGCA  | 10  | 32  | RDR2-sensitive |
| GTACTTTTTGTCCGGCACTCGGCA  | 1   | 20  | RDR2-sensitive |
| GTAGAAAACGGTACGGGTCCGAAAC | 1   | 13  | RDR2-sensitive |
| GTAGAAATCCATCGGTTGTTGAAT  | 193 | 23  | RDR2-resistant |
| GTAGAACACCGCAGGAGTAGACGT  | 0   | 14  | RDR2-sensitive |
| GTAGAACAGGACTGTCTGCGGCAC  | 0   | 109 | RDR2-sensitive |
| GTAGAACCGAACCGTGTGGGACTC  | 0   | 9   | RDR2-sensitive |
| GTAGAACGGTAGAACCCACGGTGGC | 0   | 21  | RDR2-sensitive |
| GTAGAACGGTAGAATGGACGACTG  | 0   | 21  | RDR2-sensitive |
| GTAGAACGGTAGAATGGACGGTAA  | 0   | 9   | RDR2-sensitive |
| GTAGAACGTGGCTAGTAGAGGTGT  | 0   | 18  | RDR2-sensitive |
| GTAGAACTGGACCATGTCCGGGCTC | 0   | 53  | RDR2-sensitive |
| GTAGAACTGGGAGAACGACGACGC  | 0   | 42  | RDR2-sensitive |
| GTAGAAGCCGCAGCCGCAGCCGGA  | 0   | 13  | RDR2-sensitive |
| GTAGAAGCCGCAGCCGGATTGCAG  | 0   | 19  | RDR2-sensitive |
| GTAGAAGCTTCGAGCCTTGGACGT  | 0   | 13  | RDR2-sensitive |
| GTAGAAGGGAGCACTCGGACGCGC  | 0   | 30  | RDR2-sensitive |
| GTAGAAGGGCGGACCAGAATGGTT  | 1   | 13  | RDR2-sensitive |
| GTAGAATAAACGGGCGGGCTTGGA  | 0   | 45  | RDR2-sensitive |
| GTAGAATAAGCGGACGGGCTTGGA  | 2   | 23  | RDR2-sensitive |
| GTAGAATAAGCGGGCGGACTTGGA  | 0   | 14  | RDR2-sensitive |
| GTAGAATAAGCGGGCGGGCTTGGA  | 2   | 435 | RDR2-sensitive |
| GTAGAATAAGCGGGCGGGCTTGGC  | 0   | 11  | RDR2-sensitive |
| GTAGAATAAGCGGGCGGGCTTGGG  | 0   | 11  | RDR2-sensitive |
| GTAGAATAAGCGGGCGGGCTTGGT  | 0   | 10  | RDR2-sensitive |
| GTAGAATGGACGTTGGATGGGAC   | 0   | 25  | RDR2-sensitive |
| GTAGAATGGGAAGTACTCGAGCAT  | 2   | 20  | RDR2-sensitive |
| GTAGAATGGTAGAACGGCAGGCTA  | 1   | 19  | RDR2-sensitive |

|                           |    |     |                |
|---------------------------|----|-----|----------------|
| GTAGACACTCGGCACAGACTGGTT  | 0  | 12  | RDR2-sensitive |
| GTAGACACTCGGCACGGACTGGTT  | 0  | 12  | RDR2-sensitive |
| GTAGACCACGAGCTCCGACGTCGG  | 3  | 40  | RDR2-sensitive |
| GTAGACCAGCGAGCACGACGACGT  | 0  | 14  | RDR2-sensitive |
| GTAGACCTATTCAATCGTCGGGTC  | 0  | 14  | RDR2-sensitive |
| GTAGACGAGAAGCACGAGGGACAG  | 0  | 13  | RDR2-sensitive |
| GTAGACGAGTTGGACGGTTCGTGT  | 0  | 25  | RDR2-sensitive |
| GTAGACGATGTTGGGCCAGAAGAT  | 0  | 14  | RDR2-sensitive |
| GTAGACGGCAGAACGGCAGAACAC  | 1  | 84  | RDR2-sensitive |
| GTAGACGGGTGGTGAATATAGGC   | 0  | 17  | RDR2-sensitive |
| GTAGACGGTCTGTGCTGCTACGGT  | 0  | 17  | RDR2-sensitive |
| GTAGACGTAGTAGACCGGCCGAGGA | 0  | 9   | RDR2-sensitive |
| GTAGACTCATGATCGAGCGGCTTG  | 0  | 20  | RDR2-sensitive |
| GTAGACTCGGACGTAGCTTCGGAT  | 0  | 9   | RDR2-sensitive |
| GTAGACTGACGGGACACAGATAAC  | 0  | 16  | RDR2-sensitive |
| GTAGACTGCTGTAGACGGCCTTAG  | 0  | 14  | RDR2-sensitive |
| GTAGACTGGAACGAGCCGAGTCA   | 0  | 10  | RDR2-sensitive |
| GTAGACTGGAGCAGCAGGAACGGG  | 0  | 34  | RDR2-sensitive |
| GTAGACTGGATGAGCGGATGCAAA  | 0  | 14  | RDR2-sensitive |
| GTAGACTGTACGGTGACCTACCAC  | 0  | 9   | RDR2-sensitive |
| GTAGACTGTATTAGATCCGGTTGA  | 0  | 10  | RDR2-sensitive |
| GTAGACTGTGCCGAAGATGCCACC  | 50 | 2   | RDR2-resistant |
| GTAGACTTGCAGATCTGGCCTCCA  | 17 | 38  | RDR2-sensitive |
| GTAGACTTGCAGATCTGGCCTCTG  | 0  | 15  | RDR2-sensitive |
| GTAGAGAGCATGTAGAACTGGCGT  | 0  | 10  | RDR2-sensitive |
| GTAGAGAGCGCTGTAGGGGGCACC  | 1  | 38  | RDR2-sensitive |
| GTAGAGATGGCAATGGGGACCCGA  | 0  | 9   | RDR2-sensitive |
| GTAGAGCAGCGTCGGGGTTCGGTGT | 0  | 11  | RDR2-sensitive |
| GTAGAGCGCAGGAGTGAATTCGAC  | 0  | 19  | RDR2-sensitive |
| GTAGAGCGCGCGCTGTATGTGAC   | 0  | 10  | RDR2-sensitive |
| GTAGAGCGGGCGAAGACATGACCT  | 0  | 12  | RDR2-sensitive |
| GTAGAGCGTAGAGGACCGTTTGAA  | 0  | 11  | RDR2-sensitive |
| GTAGAGCTGTACGGGCATCAACGC  | 0  | 109 | RDR2-sensitive |
| GTAGAGGACGCTGTAGGGGGCACC  | 0  | 17  | RDR2-sensitive |
| GTAGAGGAGGCAGTAGAGTGATGC  | 0  | 12  | RDR2-sensitive |
| GTAGAGGATGCTGTAGAGGGCACC  | 0  | 20  | RDR2-sensitive |
| GTAGAGGCCGAAGGTAGGAGTCGA  | 0  | 10  | RDR2-sensitive |
| GTAGAGGCGCAAGAAGATGTAGAG  | 0  | 14  | RDR2-sensitive |
| GTAGAGGCTCGACACAAGAACGGC  | 0  | 10  | RDR2-sensitive |
| GTAGAGGGCGCTGTAGAGGGCACC  | 0  | 24  | RDR2-sensitive |
| GTAGAGGGCGCTGTAGGAGGCACC  | 0  | 11  | RDR2-sensitive |
| GTAGAGGGCGCTGTAGGGGACACC  | 0  | 11  | RDR2-sensitive |
| GTAGAGGGCGCTGTAGGGGGCACC  | 2  | 85  | RDR2-sensitive |
| GTAGAGGGCTGCGCTGCCGGACGT  | 1  | 38  | RDR2-sensitive |
| GTAGAGGTCGGCTTCCCGAACAG   | 3  | 23  | RDR2-sensitive |
| GTAGAGTCGAATAGGGGTGGAGGT  | 4  | 19  | RDR2-sensitive |
| GTAGAGTGACGTGTAGGGGGCAGC  | 0  | 15  | RDR2-sensitive |
| GTAGAGTGGACGGTTGACATCGGC  | 0  | 10  | RDR2-sensitive |
| GTAGAGTGTGGTCTCTGCGTTCGA  | 2  | 19  | RDR2-sensitive |

|                           |      |    |                |
|---------------------------|------|----|----------------|
| GTAGAGTTAGGCAGACTAGGCTCA  | 0    | 12 | RDR2-sensitive |
| GTAGATAGCAGAACGGCAGAACAT  | 0    | 9  | RDR2-sensitive |
| GTAGATATACCTGACTGGGGCTTC  | 0    | 17 | RDR2-sensitive |
| GTAGATATAGGAGATGGAATCTTT  | 0    | 17 | RDR2-sensitive |
| GTAGATATTGGTGCACAGGACTGC  | 0    | 24 | RDR2-sensitive |
| GTAGATCAACGGCTGAAAATGCAA  | 0    | 10 | RDR2-sensitive |
| GTAGATCAAGAGGGCTTCTCCGGC  | 17   | 86 | RDR2-sensitive |
| GTAGATCAATGCGGTGCGACTGGAG | 0    | 10 | RDR2-sensitive |
| GTAGATCACGGCACTACCATGACT  | 0    | 15 | RDR2-sensitive |
| GTAGATCATGGGCAGCAGATACGG  | 0    | 11 | RDR2-sensitive |
| GTAGATCTTGAAGATGGATGACTT  | 17   | 1  | RDR2-resistant |
| GTAGATGGCAGAACGGCAGAACAC  | 0    | 51 | RDR2-sensitive |
| GTAGATGTTGTGGCTAGAGCGGAA  | 0    | 30 | RDR2-sensitive |
| GTAGATTCTCCGAAGCGGACTGAC  | 1    | 22 | RDR2-sensitive |
| GTAGATTGGCTGAAGGCAGAACAG  | 0    | 36 | RDR2-sensitive |
| GTAGATTGGCTGAAGGCAGAACCA  | 0    | 37 | RDR2-sensitive |
| GTAGCAACGCACGGACATACACCT  | 0    | 18 | RDR2-sensitive |
| GTAGCAACGGTCGGTTGGTCGCTA  | 0    | 12 | RDR2-sensitive |
| GTAGCAACGTACGGGCATATACCT  | 0    | 12 | RDR2-sensitive |
| GTAGCACACAGTGGAATTGAGCAT  | 0    | 14 | RDR2-sensitive |
| GTAGCACTCGGCAAAGGAACTGGC  | 1    | 18 | RDR2-sensitive |
| GTAGCAGACCGGCGAAGAGAACGA  | 0    | 9  | RDR2-sensitive |
| GTAGCAGATCAGCGAGGACGACGA  | 0    | 18 | RDR2-sensitive |
| GTAGCAGCTCGGCTCGGCGCTCAG  | 0    | 10 | RDR2-sensitive |
| GTAGCAGCTCGGCTTACTCGGAC   | 0    | 13 | RDR2-sensitive |
| GTAGCAGTCGACCGTTGGATCCGA  | 2    | 25 | RDR2-sensitive |
| GTAGCATCGCACGGGTACGTACCT  | 0    | 14 | RDR2-sensitive |
| GTAGCATTCTGTGCGGAGCGTGCG  | 2    | 14 | RDR2-sensitive |
| GTAGCCGGAACAAGATAGCCTCAG  | 0    | 11 | RDR2-sensitive |
| GTAGCCTCGGCCTGTAGTGTTGGC  | 0    | 9  | RDR2-sensitive |
| GTAGCCTGGACAACGTGAGCGGAG  | 0    | 9  | RDR2-sensitive |
| GTAGCCTGGACGTGGAGTACAAGA  | 20   | 1  | RDR2-resistant |
| GTAGCCTGGACGTGGAGTATAAGA  | 33   | 0  | RDR2-resistant |
| GTAGCCTGGCTGAGCGACGACGAA  | 0    | 11 | RDR2-sensitive |
| GTAGCCTGTAGGGTTTGTGGCGGA  | 0    | 14 | RDR2-sensitive |
| GTAGCGAAGACTGCATGGACAGAC  | 0    | 15 | RDR2-sensitive |
| GTAGCGACAATTTACTCGTCGGTC  | 2    | 43 | RDR2-sensitive |
| GTAGCGACTCGACGGTACGAACGA  | 0    | 31 | RDR2-sensitive |
| GTAGCGCGGATGGCAGAACCAAA   | 0    | 14 | RDR2-sensitive |
| GTAGCGCTGACTCTTGGCATTCTC  | 1248 | 87 | RDR2-resistant |
| GTAGCGGAGTAGTAGACCGGCGAA  | 0    | 12 | RDR2-sensitive |
| GTAGCGGCTGAAGCAGAGACTCTA  | 0    | 9  | RDR2-sensitive |
| GTAGCGGTGTAGAAGGCCTTCAAC  | 0    | 10 | RDR2-sensitive |
| GTAGCGTAGCTCTACTTAGATCGT  | 24   | 0  | RDR2-resistant |
| GTAGCGTCTGATTGTACGGTGGTT  | 0    | 18 | RDR2-sensitive |
| GTAGCTAACTGGACCTAAGAGCAT  | 0    | 9  | RDR2-sensitive |
| GTAGCTAGTATAGACATGGGCGGA  | 0    | 13 | RDR2-sensitive |
| GTAGCTCGGCGCCAAGATCTGCGG  | 1    | 16 | RDR2-sensitive |
| GTAGCTCGGCGCCAAGATCTGTGG  | 1    | 14 | RDR2-sensitive |

|                           |    |    |                |
|---------------------------|----|----|----------------|
| GTAGCTCGGCGCCACAGATCTTGG  | 2  | 29 | RDR2-sensitive |
| GTAGCTCGGCTGTATATTGGGTGA  | 0  | 63 | RDR2-sensitive |
| GTAGCTCTCGCGGATGCTGGGCAC  | 0  | 20 | RDR2-sensitive |
| GTAGCTCTGCGGACGGTGATTTTA  | 0  | 18 | RDR2-sensitive |
| GTAGCTCTGCGGACGGTGATTTTG  | 1  | 24 | RDR2-sensitive |
| GTAGCTCTTGTATTGTAGTGACGT  | 0  | 42 | RDR2-sensitive |
| GTAGCTGCAGACGGATGACCACAT  | 0  | 13 | RDR2-sensitive |
| GTAGCTGGAGAACGTAGCAGCATG  | 0  | 31 | RDR2-sensitive |
| GTAGCTGTAGGGGACGGAATTTAG  | 0  | 9  | RDR2-sensitive |
| GTAGCTGTGGAGTAGTAGGCTGGT  | 0  | 9  | RDR2-sensitive |
| GTAGCTTACGTGGCTGCAATCTGA  | 23 | 0  | RDR2-resistant |
| GTAGCTTATACGTGCTGGGTCGGA  | 0  | 13 | RDR2-sensitive |
| GTAGCTTCGGATTCGGGTCGGATA  | 0  | 13 | RDR2-sensitive |
| GTAGGAAGTTAGCGGCTCGTTTGA  | 0  | 23 | RDR2-sensitive |
| GTAGGAATGTGTGCAACGGCAGCT  | 30 | 1  | RDR2-resistant |
| GTAGGAATTGTCGAATCAAACCGG  | 0  | 11 | RDR2-sensitive |
| GTAGGACAACAGGACTGCAGAAGG  | 0  | 9  | RDR2-sensitive |
| GTAGGACACATGTAGGTGGTCGTA  | 0  | 25 | RDR2-sensitive |
| GTAGGACACCGCAGGACACTGGGC  | 0  | 9  | RDR2-sensitive |
| GTAGGACACTCGGCACAGAACGAC  | 0  | 12 | RDR2-sensitive |
| GTAGGACACTCGGCACAGGACGAC  | 0  | 12 | RDR2-sensitive |
| GTAGGACACTCGGTACAGGTCCAC  | 0  | 10 | RDR2-sensitive |
| GTAGGACAGACAGGACAGGGACGT  | 0  | 26 | RDR2-sensitive |
| GTAGGACAGTCAGGACATAGACGT  | 0  | 13 | RDR2-sensitive |
| GTAGGACAGTTCGGCTAGGCCAAG  | 0  | 11 | RDR2-sensitive |
| GTAGGACAGTTCGGCTAGGCCAGA  | 1  | 15 | RDR2-sensitive |
| GTAGGACAGTTCGGCTAGGCCAGG  | 0  | 10 | RDR2-sensitive |
| GTAGGACAGTTCGGCTAGGCCGGA  | 0  | 10 | RDR2-sensitive |
| GTAGGACAGTTCGGCTAGGCCGGT  | 0  | 11 | RDR2-sensitive |
| GTAGGACCAGTGGCACACAAGTAA  | 0  | 15 | RDR2-sensitive |
| GTAGGACCCTAGGAAGTCGACCAT  | 0  | 10 | RDR2-sensitive |
| GTAGGACCGCTAACCTAGAGTAGA  | 0  | 9  | RDR2-sensitive |
| GTAGGACCGCTGACCTAGAGTAGC  | 3  | 20 | RDR2-sensitive |
| GTAGGACCGGATGTAGGGACGTGC  | 0  | 97 | RDR2-sensitive |
| GTAGGACCTAGTAGCAGCAGTCAT  | 0  | 65 | RDR2-sensitive |
| GTAGGACGACCCAGTAGAAGGCC   | 0  | 12 | RDR2-sensitive |
| GTAGGACGAGCAGGATAGACCTAG  | 0  | 10 | RDR2-sensitive |
| GTAGGACGCCACAGATCGATCGGA  | 0  | 20 | RDR2-sensitive |
| GTAGGACGGAGTTGAGGCCGAGAG  | 0  | 11 | RDR2-sensitive |
| GTAGGACGTAACCTCGGGAGCGGGC | 0  | 18 | RDR2-sensitive |
| GTAGGACTACTTCCAGAGGTCTGG  | 0  | 24 | RDR2-sensitive |
| GTAGGACTAGGACCTCGTCAGGCG  | 1  | 36 | RDR2-sensitive |
| GTAGGACTGCAGGGAGGACAGCGT  | 0  | 30 | RDR2-sensitive |
| GTAGGACTGCTTACAGAGGTGCGAA | 0  | 11 | RDR2-sensitive |
| GTAGGACTGCTTCCAGAGGTGCGAA | 4  | 64 | RDR2-sensitive |
| GTAGGACTGTGCAGGCCCGGCCG   | 1  | 27 | RDR2-sensitive |
| GTAGGACTGTTTCTAGAGGTGCGAA | 0  | 9  | RDR2-sensitive |
| GTAGGAGACGTGGCTTGCATGAAC  | 0  | 24 | RDR2-sensitive |
| GTAGGAGATCGCGGTGTGGATGCC  | 0  | 9  | RDR2-sensitive |

|                            |    |     |                |
|----------------------------|----|-----|----------------|
| GTAGGAGCCAGGAGCTAAGACGTT   | 0  | 11  | RDR2-sensitive |
| GTAGGAGCCGGTAGAAACCACGTT   | 0  | 9   | RDR2-sensitive |
| GTAGGAGGAGCCCGTAGAAGACAC   | 0  | 12  | RDR2-sensitive |
| GTAGGAGGATACGGTGCGACTGTC   | 26 | 1   | RDR2-resistant |
| GTAGGAGGCACCGCTGCGGCCATA   | 0  | 14  | RDR2-sensitive |
| GTAGGAGGCGCTGTAGGGGGCACC   | 2  | 45  | RDR2-sensitive |
| GTAGGAGGCGCTGTAGGGGGCATC   | 0  | 31  | RDR2-sensitive |
| GTAGGAGGCGTTGTAGGGGGCACC   | 0  | 9   | RDR2-sensitive |
| GTAGGAGTCCCTCGGCTCGGTCGG   | 2  | 29  | RDR2-sensitive |
| GTAGGATACGGATACGGAGCCAGC   | 0  | 18  | RDR2-sensitive |
| GTAGGATAGCTCGGAAGATGACAC   | 0  | 22  | RDR2-sensitive |
| GTAGGATAGGGATCGACAACGGTT   | 0  | 9   | RDR2-sensitive |
| GTAGGATCTAGGACACCGGCTAGA   | 0  | 16  | RDR2-sensitive |
| GTAGGATGAGACGAGCCTGCTCAC   | 0  | 10  | RDR2-sensitive |
| GTAGGATGAGGCGTGACGACATC    | 0  | 23  | RDR2-sensitive |
| GTAGGATGCCATGGTAGAGGCACA   | 15 | 0   | RDR2-resistant |
| GTAGGATGGTACAGACGCTGTATA   | 0  | 17  | RDR2-sensitive |
| GTAGGCAACCGTCGGACATACGGT   | 0  | 13  | RDR2-sensitive |
| GTAGGCACTCGGCAAAGACAAGTT   | 0  | 13  | RDR2-sensitive |
| GTAGGCCCAAACACTCAGAGACAA   | 0  | 33  | RDR2-sensitive |
| GTAGGCCCGGATGACTCCAGAAGC   | 0  | 9   | RDR2-sensitive |
| GTAGGCCTGCAGTAGATAGGATAT   | 0  | 10  | RDR2-sensitive |
| GTAGGCCTGGGCAGAAAACCTCGAA  | 0  | 16  | RDR2-sensitive |
| GTAGGCCTGTGACGTGCCGGACCA   | 0  | 18  | RDR2-sensitive |
| GTAGGCGACTGTAAGGCGGAGTGA   | 0  | 9   | RDR2-sensitive |
| GTAGGCGATGACTGTCCGAGATGC   | 0  | 24  | RDR2-sensitive |
| GTAGGCGTCAAGGGGAGAAGGAT    | 44 | 4   | RDR2-resistant |
| GTAGGCTCGAACTCCGACGGTGAC   | 0  | 16  | RDR2-sensitive |
| GTAGGCTCGGACGTAGGCCCGGAT   | 1  | 18  | RDR2-sensitive |
| GTAGGCTCGGATACAGGTTCCGGAT  | 0  | 12  | RDR2-sensitive |
| GTAGGCTGACGGCTCTCGGTTTCCAC | 0  | 11  | RDR2-sensitive |
| GTAGGCTGTAGCGTAGATTGGCCT   | 0  | 13  | RDR2-sensitive |
| GTAGGCTGTAGTACCGCACGTCGT   | 0  | 41  | RDR2-sensitive |
| GTAGGCTGTAGTAGTAGGACTGGG   | 0  | 9   | RDR2-sensitive |
| GTAGGGACAGAGGAAGTAAGTCEGA  | 0  | 10  | RDR2-sensitive |
| GTAGGGACCGCAACAAGACGAGA    | 0  | 9   | RDR2-sensitive |
| GTAGGGACGACCCAGCAGACTCGC   | 0  | 15  | RDR2-sensitive |
| GTAGGGACGACCTTGCAGACTCGC   | 0  | 10  | RDR2-sensitive |
| GTAGGGACGGTCTGTGATCAGGAG   | 0  | 9   | RDR2-sensitive |
| GTAGGGACTGACATCAAGACGAGA   | 0  | 18  | RDR2-sensitive |
| GTAGGGACTGGCATAAGACGAGAC   | 0  | 9   | RDR2-sensitive |
| GTAGGGACTGGCATCAAGACGAGA   | 0  | 73  | RDR2-sensitive |
| GTAGGGACTGGCGTCEAAGCGAGG   | 0  | 12  | RDR2-sensitive |
| GTAGGGAGCGCTGTAGGGGGCACC   | 2  | 86  | RDR2-sensitive |
| GTAGGGATGAACACGAGAACACGC   | 0  | 14  | RDR2-sensitive |
| GTAGGGCCGGCCTGGACACGCATA   | 0  | 41  | RDR2-sensitive |
| GTAGGGCGAGTAGAGACGCGCAA    | 0  | 12  | RDR2-sensitive |
| GTAGGGCGCTGTAGCAGGCACCGC   | 0  | 119 | RDR2-sensitive |
| GTAGGGCGGCAAGACATGACCACG   | 0  | 13  | RDR2-sensitive |

|                           |    |     |                |
|---------------------------|----|-----|----------------|
| GTAGGGCGGGCTGACGAGTGAGGC  | 0  | 9   | RDR2-sensitive |
| GTAGGGCTGACGCGGTGCCGACAT  | 0  | 23  | RDR2-sensitive |
| GTAGGGCTGCAGGAACGGCAGATT  | 2  | 103 | RDR2-sensitive |
| GTAGGGCTGGACGTGGCTTGTCTAG | 0  | 18  | RDR2-sensitive |
| GTAGGGGACACCGCTGCGGCCATA  | 0  | 11  | RDR2-sensitive |
| GTAGGGGACGCTGTAGAGGGCACC  | 2  | 212 | RDR2-sensitive |
| GTAGGGGACGCTGTAGAGGGCAGC  | 2  | 28  | RDR2-sensitive |
| GTAGGGGACGCTGTAGGGGCACCG  | 0  | 12  | RDR2-sensitive |
| GTAGGGGACGCTGTAGGGGGCACC  | 2  | 63  | RDR2-sensitive |
| GTAGGGGCACGTAGATGGCAGAAC  | 1  | 19  | RDR2-sensitive |
| GTAGGGGCGCTGTAGAGGGCACCG  | 1  | 21  | RDR2-sensitive |
| GTAGGGGCTGGAGGTGGAGGGGAC  | 41 | 0   | RDR2-resistant |
| GTAGGGGCTGGAGGTGGAGGGGGC  | 21 | 0   | RDR2-resistant |
| GTAGGGGCTGTAGGGGGCACCTA   | 0  | 14  | RDR2-sensitive |
| GTAGGGGGCGCTGTAGAGGGCACC  | 0  | 27  | RDR2-sensitive |
| GTAGGGGGCGCTGTAGGAGGCACC  | 0  | 48  | RDR2-sensitive |
| GTAGGGGGCGCTGTAGGGGACACC  | 0  | 11  | RDR2-sensitive |
| GTAGGGGGCGCTGTAGGGGGCACC  | 1  | 75  | RDR2-sensitive |
| GTAGGGGGCGCTGTAGGGGGCATC  | 0  | 9   | RDR2-sensitive |
| GTAGGGGGCGCTGTAGTGGGCATC  | 0  | 10  | RDR2-sensitive |
| GTAGGGGGCGTTGTAGAGGGCATC  | 0  | 10  | RDR2-sensitive |
| GTAGGGGGCTGCACTGCAGGACGA  | 0  | 15  | RDR2-sensitive |
| GTAGGGGGCGCTGTAGGAGGCAC   | 0  | 25  | RDR2-sensitive |
| GTAGGGGTAGATCTGAGCAAGACG  | 0  | 12  | RDR2-sensitive |
| GTAGGGTAGGACGGGTGTTGGAGC  | 0  | 32  | RDR2-sensitive |
| GTAGGGTCAGACTGCTAGGTCCGT  | 0  | 9   | RDR2-sensitive |
| GTAGGGTCAGTAGCATAACAAGGAA | 0  | 37  | RDR2-sensitive |
| GTAGGGTGGATTGGAGAGGACGTG  | 0  | 10  | RDR2-sensitive |
| GTAGGGTTGAGACGCGTCCTCTAG  | 0  | 9   | RDR2-sensitive |
| GTAGGTCTCGGTTGAAGGGCACGG  | 1  | 13  | RDR2-sensitive |
| GTAGGTCTGTCAAGCTTGAGTCAT  | 0  | 12  | RDR2-sensitive |
| GTAGGTGTAGAGCACAGGAACGGT  | 0  | 16  | RDR2-sensitive |
| GTAGGTGTAGGAGTCTAATGGCAT  | 0  | 20  | RDR2-sensitive |
| GTAGGTGTGCAGTACATGGACGGT  | 0  | 9   | RDR2-sensitive |
| GTAGGTGTGGAGCACAGGGACTGT  | 0  | 9   | RDR2-sensitive |
| GTAGGTTGATTAATTTTGTACGGC  | 15 | 0   | RDR2-resistant |
| GTAGTACGGGTAGGCATGTAAACA  | 0  | 11  | RDR2-sensitive |
| GTAGTACGTCAGAGGAACCGGCTC  | 2  | 20  | RDR2-sensitive |
| GTAGTACTTGTGCAGATTTGTGGA  | 32 | 1   | RDR2-resistant |
| GTAGTAGACCGGCGAGGACGACGA  | 0  | 31  | RDR2-sensitive |
| GTAGTAGACTATAGCGTCCGGCGTA | 0  | 10  | RDR2-sensitive |
| GTAGTAGCACTGGACAAGCACTGC  | 0  | 12  | RDR2-sensitive |
| GTAGTAGCGCAGGATCTTGGGCAT  | 0  | 10  | RDR2-sensitive |
| GTAGTAGCTGACTGCGGGGACGCT  | 0  | 10  | RDR2-sensitive |
| GTAGTAGCTGTAGCTCATAGGCAT  | 1  | 133 | RDR2-sensitive |
| GTAGTATTTTCGGTTGGTAGTGGC  | 92 | 5   | RDR2-resistant |
| GTAGTCATATTTTGGTCCTAGGAG  | 33 | 0   | RDR2-resistant |
| GTAGTCATGAAGGCGGCTGTAGAC  | 3  | 18  | RDR2-sensitive |
| GTAGTCATGCTATAGATATGAGAC  | 14 | 0   | RDR2-resistant |

|                           |      |     |                |
|---------------------------|------|-----|----------------|
| GTAGTCGATGTAGTCATGGGCGGA  | 0    | 106 | RDR2-sensitive |
| GTAGTCGATGTAGTCATGGGCGGG  | 0    | 9   | RDR2-sensitive |
| GTAGTCGTACACGAGCATCAGCCT  | 0    | 12  | RDR2-sensitive |
| GTAGTCTGACGTGAGGTAGGTGTG  | 1    | 39  | RDR2-sensitive |
| GTAGTCTGAGCTGGCAGCTGACGT  | 0    | 21  | RDR2-sensitive |
| GTAGTCTTAGTTGGTCATGGCTGT  | 25   | 0   | RDR2-resistant |
| GTAGTGAACCGGACCGAGACGTAG  | 1    | 43  | RDR2-sensitive |
| GTAGTGAAGCCCGCGGTCGTAGGA  | 0    | 11  | RDR2-sensitive |
| GTAGTGAATCGGGTCTGTGCCGGC  | 0    | 16  | RDR2-sensitive |
| GTAGTGAGCGGAACGACGGTAGAA  | 0    | 12  | RDR2-sensitive |
| GTAGTGCCTTGC GGAAGATATGCG | 0    | 11  | RDR2-sensitive |
| GTAGTGCTGGCACGGACATGACAT  | 1    | 22  | RDR2-sensitive |
| GTAGTGGAAGGCGGGCTGGGCAGC  | 1021 | 110 | RDR2-resistant |
| GTAGTGGACCGTGAAACAAGGCTC  | 0    | 9   | RDR2-sensitive |
| GTAGTGGGAACATGCAGGACGCGG  | 0    | 10  | RDR2-sensitive |
| GTAGTGTGCTGGAGACGGTTTGAG  | 18   | 1   | RDR2-resistant |
| GTAGTGTTTGGATGCAGGGACGAG  | 0    | 9   | RDR2-sensitive |
| GTAGTTCCCCTCTGGCAGAGTCGT  | 0    | 10  | RDR2-sensitive |
| GTAGTTCGTGGACACGGAGGATGA  | 0    | 9   | RDR2-sensitive |
| GTAGTTGGCGTAGACGACCTCGGC  | 0    | 10  | RDR2-sensitive |
| GTAGTTGGGAAGTGGAACGACGGA  | 0    | 10  | RDR2-sensitive |
| GTAGTTGGGGACGGCCATGAACCTT | 3    | 50  | RDR2-sensitive |
| GTAGTTGGTAGACGGTTCTCATAG  | 0    | 12  | RDR2-sensitive |
| GTAGTTGGTGTGTAGGATCGGTAA  | 0    | 9   | RDR2-sensitive |
| GTAGTTTTGGACGTACGGACGGAT  | 0    | 17  | RDR2-sensitive |
| GTATAAATGGACGGTTGGATGGGC  | 0    | 10  | RDR2-sensitive |
| GTATAACCTCGCCGGAGAAGACAA  | 0    | 9   | RDR2-sensitive |
| GTATAACCTCGCCGGAGAAGACAG  | 0    | 45  | RDR2-sensitive |
| GTATAACTCGTAGCGCTTCGGCAT  | 0    | 21  | RDR2-sensitive |
| GTATAACTGTGACGTAGATGACTT  | 35   | 6   | RDR2-resistant |
| GTATACTCGGACCGACCCGTTGGA  | 0    | 12  | RDR2-sensitive |
| GTATAGAACCTGGTCGTGCCGGAC  | 0    | 18  | RDR2-sensitive |
| GTATAGAACGGAGCTCGGCGCCAT  | 0    | 9   | RDR2-sensitive |
| GTATAGACGCTGGATCCTCGGTAT  | 0    | 10  | RDR2-sensitive |
| GTATAGATCCATATGCTCGTTGGA  | 21   | 2   | RDR2-resistant |
| GTATAGATCGGGCTAGCACGGCTC  | 0    | 11  | RDR2-sensitive |
| GTATAGATGGATTTGTATAGGTAT  | 0    | 25  | RDR2-sensitive |
| GTATAGCGTTGGACAGTCCGGATA  | 0    | 20  | RDR2-sensitive |
| GTATAGGTTGGGCTGCACGTACGG  | 1    | 51  | RDR2-sensitive |
| GTATAGTGTGAGAAAATTTGGTAT  | 255  | 4   | RDR2-resistant |
| GTATATAGAGGACGTTGCTGGAGA  | 1    | 22  | RDR2-sensitive |
| GTATCAAATTATTGTTCCGTCGAG  | 0    | 15  | RDR2-sensitive |
| GTATCACGACTGTATAGGATGGTA  | 1    | 14  | RDR2-sensitive |
| GTATCACTTCGGACATGACGGCAT  | 0    | 18  | RDR2-sensitive |
| GTATCAGACTGTTCTTAGGCCGAG  | 0    | 11  | RDR2-sensitive |
| GTATCCCTGTAGCGTAGTCGGTC   | 4    | 36  | RDR2-sensitive |
| GTATCCCGGCTGAGACGCGACATG  | 0    | 16  | RDR2-sensitive |
| GTATCCCTGTAGAGTACGGAAATA  | 0    | 46  | RDR2-sensitive |
| GTATCCGGTGGACTGAGGGGCGGT  | 0    | 10  | RDR2-sensitive |



|                           |    |    |                |
|---------------------------|----|----|----------------|
| GTATCGATGGGCAGGAACGTCCGC  | 0  | 20 | RDR2-sensitive |
| GTATCGGGCTGAAACGGGTTCCGGA | 0  | 33 | RDR2-sensitive |
| GTATCTAGAAGGCCGGACGCGCAC  | 0  | 9  | RDR2-sensitive |
| GTATCTAGGATGCCGGACATGCAC  | 0  | 14 | RDR2-sensitive |
| GTATCTCGGATTTCCGGCACGGGT  | 0  | 24 | RDR2-sensitive |
| GTATCTGATTACGGTTGGACTAAA  | 0  | 17 | RDR2-sensitive |
| GTATCTGGCTGGTCAGGACGGCGC  | 0  | 9  | RDR2-sensitive |
| GTATCTGGTGGGCTGAGGGGCGGT  | 0  | 33 | RDR2-sensitive |
| GTATCTTCGGACACAAGTCGGCAT  | 1  | 22 | RDR2-sensitive |
| GTATCTTCGGACTCAAGTCGGCAC  | 0  | 10 | RDR2-sensitive |
| GTATCTTCGGACTCAAGTCGGCAT  | 1  | 66 | RDR2-sensitive |
| GTATCTTCGGACTCAAGTCGGTAC  | 0  | 9  | RDR2-sensitive |
| GTATCTTCGGACTCAAGTCGGTAT  | 1  | 56 | RDR2-sensitive |
| GTATCTTCGGACTCAGTCGGCAT   | 2  | 18 | RDR2-sensitive |
| GTATCTTCGGACTCGAGTCGGTAT  | 1  | 37 | RDR2-sensitive |
| GTATCTTCGGATTCAAGTCGGCAT  | 1  | 23 | RDR2-sensitive |
| GTATCTTCGGGCTCGAGTCGGTAT  | 0  | 18 | RDR2-sensitive |
| GTATCTTCGGTCTCAAGTCGGCAT  | 0  | 18 | RDR2-sensitive |
| GTATCTTTATTGGATCGTGTCGGT  | 0  | 11 | RDR2-sensitive |
| GTATGAAATCTCCAGACGGACTGC  | 0  | 11 | RDR2-sensitive |
| GTATGACATGTGGAGCCAGTGGCA  | 0  | 9  | RDR2-sensitive |
| GTATGACGGCGGCAGGGATGGGGC  | 0  | 12 | RDR2-sensitive |
| GTATGAGACGAGCTACGTGGATAA  | 0  | 10 | RDR2-sensitive |
| GTATGAGTAGGGACGCAGGGACGA  | 0  | 61 | RDR2-sensitive |
| GTATGAGTGTAGAGGTGTGGAGGA  | 0  | 10 | RDR2-sensitive |
| GTATGATGGACTCTAGGATGAGGC  | 32 | 1  | RDR2-resistant |
| GTATGATGGACTCTTGATGAGGC   | 31 | 0  | RDR2-resistant |
| GTATGCGGATTACTGTACGGGCAG  | 0  | 14 | RDR2-sensitive |
| GTATGCTGTTGAGCCAGGGGACGT  | 1  | 25 | RDR2-sensitive |
| GTATGCTTTTATGTCTGGAGGAAC  | 14 | 0  | RDR2-resistant |
| GTATGGAATGGTACTACCCGACGG  | 0  | 17 | RDR2-sensitive |
| GTATGGACCAACAGTGGAGTATGT  | 0  | 9  | RDR2-sensitive |
| GTATGGACCTAACTCAGGAGCGGA  | 0  | 34 | RDR2-sensitive |
| GTATGGACTAGTAGCATACCGGTG  | 0  | 26 | RDR2-sensitive |
| GTATGGACTCTATGGCGTTGTTAT  | 20 | 1  | RDR2-resistant |
| GTATGGACTGAGGACATCACGGTG  | 0  | 21 | RDR2-sensitive |
| GTATGGAGAGTCGTGTAGAGACGG  | 0  | 11 | RDR2-sensitive |
| GTATGGATTGGACGGGATTGGAAA  | 0  | 10 | RDR2-sensitive |
| GTATGGCATAGTCGAGGACCTCTG  | 0  | 9  | RDR2-sensitive |
| GTATGGCTTCGGCGGCAAGGGCAC  | 57 | 14 | RDR2-resistant |
| GTATGGGACGACGACGATGATGGT  | 0  | 9  | RDR2-sensitive |
| GTATGGGCAGTAGTCAAGCGGTAT  | 0  | 14 | RDR2-sensitive |
| GTATGGGGCGCTGTAGGGGGCACC  | 0  | 22 | RDR2-sensitive |
| GTATGGTGCTGTTGTCCAAGGTTA  | 0  | 10 | RDR2-sensitive |
| GTATGTATATGGACCGATCTGGCA  | 25 | 1  | RDR2-resistant |
| GTATGTCGAGCTTTGGAGGTGGTG  | 0  | 16 | RDR2-sensitive |
| GTATGTCGCGTAGGACAGTTCGGC  | 0  | 27 | RDR2-sensitive |
| GTATTAAATGTAGTCGGATTATAA  | 1  | 26 | RDR2-sensitive |
| GTATTACATGGTCGTTATCTAGGA  | 14 | 0  | RDR2-resistant |

|                            |    |     |                |
|----------------------------|----|-----|----------------|
| GTATTAGGGTAGAGGCCGGACAAT   | 0  | 9   | RDR2-sensitive |
| GTATTATAAATGTGATCGAGGAAT   | 15 | 0   | RDR2-resistant |
| GTATTATTTTATGTCGGATCATACT  | 0  | 13  | RDR2-sensitive |
| GTATTTCGCTATATGTTTCGGACGCT | 0  | 12  | RDR2-sensitive |
| GTATTCTGAGCGAGTAGTCGGCTC   | 1  | 46  | RDR2-sensitive |
| GTATTCTGAGTGAGTAGTCGGCTC   | 0  | 15  | RDR2-sensitive |
| GTATTGACCGGTATCACGGGCTGT   | 0  | 9   | RDR2-sensitive |
| GTATTGACTGAGATCGAGTCGGAT   | 0  | 13  | RDR2-sensitive |
| GTATTGAGTGGGATTGAGCCGGTT   | 1  | 13  | RDR2-sensitive |
| GTATTGCGGGCGGGACGATCGGGC   | 0  | 10  | RDR2-sensitive |
| GTATTGGACGGGATCGAGACGGAT   | 2  | 14  | RDR2-sensitive |
| GTATTGGGCCTGCGAACACGACGG   | 0  | 25  | RDR2-sensitive |
| GTATTGGGCTTGCGAACACGACGG   | 1  | 113 | RDR2-sensitive |
| GTATTGGTCTGTGGAGATGGTCTA   | 0  | 13  | RDR2-sensitive |
| GTATTGGTCTTATGATACTTCGGT   | 0  | 12  | RDR2-sensitive |
| GTATTGTAGCGGTGCACACCCATC   | 0  | 13  | RDR2-sensitive |
| GTATTGTTTGAATTCGGGCCGGT    | 0  | 9   | RDR2-sensitive |
| GTATTTCCGGTCCGAGCAGAACGA   | 0  | 71  | RDR2-sensitive |
| GTATTTGCTATATGTTCCGACGCT   | 44 | 0   | RDR2-resistant |
| GTATTTGGACTGACACGGCACAAAT  | 0  | 10  | RDR2-sensitive |
| GTATTTGGGCTGTGAATAAAAGGC   | 0  | 16  | RDR2-sensitive |
| GTCAAACACTCGGCAAAGGGGGCT   | 1  | 19  | RDR2-sensitive |
| GTCAAACGCGGAATAGAACGGCTC   | 0  | 46  | RDR2-sensitive |
| GTCAAACCTCTCGGCGAACGACGAC  | 0  | 12  | RDR2-sensitive |
| GTCAAACCTGGGACTAGAGGACGAC  | 0  | 10  | RDR2-sensitive |
| GTCAACAGATCGTGCCTGGGCGT    | 0  | 34  | RDR2-sensitive |
| GTCAACCATCGGCTTTGGGGCGGT   | 0  | 10  | RDR2-sensitive |
| GTCAACCTCGTCGTTTCGTCGTCAC  | 0  | 10  | RDR2-sensitive |
| GTCAACGACTGTAGCAAAATGGTT   | 9  | 27  | RDR2-sensitive |
| GTCAACGGAACGATGGGACGACGC   | 0  | 10  | RDR2-sensitive |
| GTCAACTGTCCACTCTGCAACGGC   | 1  | 27  | RDR2-sensitive |
| GTCAAGATTGGGTCGTGGACGGTT   | 0  | 10  | RDR2-sensitive |
| GTCAAGCGGAGACGAGGTGAACAC   | 0  | 28  | RDR2-sensitive |
| GTCAAGCGGAGGCGAGGTGAACAC   | 1  | 27  | RDR2-sensitive |
| GTCAAGCGGGGACGAGGTGAACAC   | 0  | 12  | RDR2-sensitive |
| GTCAAGCGGGGGCGAGGTGAACAC   | 1  | 14  | RDR2-sensitive |
| GTCAAGCGTCGGCGCAGCATCCAG   | 0  | 12  | RDR2-sensitive |
| GTCAAGGCTGCACAGATCGACGGC   | 0  | 10  | RDR2-sensitive |
| GTCAAGTAGGATCGGGTCGTCTGTT  | 81 | 24  | RDR2-resistant |
| GTCAAGTCGGCGTTTCTTAACGGC   | 41 | 8   | RDR2-resistant |
| GTCAAGTTACATGTCGGATAAGAT   | 0  | 9   | RDR2-sensitive |
| GTCACACCCGGTTTTAGAAGGCAA   | 0  | 10  | RDR2-sensitive |
| GTCACACCCGACAGCAGATCGCAT   | 0  | 15  | RDR2-sensitive |
| GTCACCAGGGCTAGGGCGGCTGAC   | 0  | 9   | RDR2-sensitive |
| GTCACCATATCGTGGAGTAGGCAT   | 0  | 13  | RDR2-sensitive |
| GTCACCATTGTGATCGGACGCAAC   | 22 | 0   | RDR2-resistant |
| GTCACCCTAGGTTGATTGTGGGAC   | 0  | 11  | RDR2-sensitive |
| GTCACCGGACGAATGGGATAGGCT   | 0  | 10  | RDR2-sensitive |
| GTCACCGTCTGCTGGGCAGGGCAT   | 4  | 20  | RDR2-sensitive |

|                             |    |    |                |
|-----------------------------|----|----|----------------|
| GTCACCGTCGTCTGGGCAGGGCGT    | 1  | 21 | RDR2-sensitive |
| GTCACCGTTGGATGTGGAGGGTGT    | 0  | 24 | RDR2-sensitive |
| GTCACCTTTGTAGTATTTTCGGTT    | 40 | 1  | RDR2-resistant |
| GTCACGTAGGGACTGGCATAAGAC    | 0  | 10 | RDR2-sensitive |
| GTCACGTTGGCTAGAAGGTGGAAG    | 0  | 9  | RDR2-sensitive |
| GTCACGTTGGCTAGAGGGTGAAG     | 0  | 15 | RDR2-sensitive |
| GTCACTCGGCTGACGTACGCGGTT    | 4  | 39 | RDR2-sensitive |
| GTCACTCGGTACTIONCGGCAAAGAAA | 1  | 48 | RDR2-sensitive |
| GTCACTCGGTCCTCGAACTTGGCA    | 0  | 10 | RDR2-sensitive |
| GTCACTCTGGATGGTCTGGACGGT    | 1  | 17 | RDR2-sensitive |
| GTCAGAACTGCGAGCCGAGCCGAG    | 0  | 9  | RDR2-sensitive |
| GTCAGACCGGTCAGTGGAGCGGCG    | 2  | 26 | RDR2-sensitive |
| GTCAGATCCAACGACTAGACGCAT    | 0  | 19 | RDR2-sensitive |
| GTCAGATCCAACGGCTAGGCGCAC    | 0  | 9  | RDR2-sensitive |
| GTCAGATGCGGACGGCTGGACGGT    | 1  | 15 | RDR2-sensitive |
| GTCAGATGGACTGCGCCAAGACGG    | 0  | 17 | RDR2-sensitive |
| GTCAGATGGTGGACGACAGAGCGG    | 0  | 12 | RDR2-sensitive |
| GTCAGCGCGAACACAAGTCCGAGA    | 0  | 9  | RDR2-sensitive |
| GTCAGCTCGTGGACGACAGCGCGG    | 2  | 47 | RDR2-sensitive |
| GTCAGGAGACTGAAGACGCCAGAG    | 0  | 9  | RDR2-sensitive |
| GTCAGGGAGCACTCGGCAAAGAAA    | 0  | 10 | RDR2-sensitive |
| GTCAGGTCGGTCACTGGAAGGGCG    | 1  | 12 | RDR2-sensitive |
| GTCAGGTCGGTCACTGGAGCGGCG    | 3  | 40 | RDR2-sensitive |
| GTCAGGTCGGTCACTGGAGCGGTG    | 0  | 16 | RDR2-sensitive |
| GTCAGTAGTCCCTGTATTCGGTTT    | 0  | 11 | RDR2-sensitive |
| GTCAGTCGGCTGAGAATGCACGTG    | 0  | 11 | RDR2-sensitive |
| GTCAGTCGGCTGTGAATGCAGGTG    | 0  | 9  | RDR2-sensitive |
| GTCAGTGACTIONTGGGCCGGACGGT  | 0  | 14 | RDR2-sensitive |
| GTCAGTGGAGTAGACAGGGCGCAT    | 0  | 11 | RDR2-sensitive |
| GTCATACAGATCGGACTAGCACGG    | 0  | 19 | RDR2-sensitive |
| GTCATATGCGCTGTCACGTCCGTA    | 0  | 16 | RDR2-sensitive |
| GTCATATGGGTCGGGCTAGCACGG    | 0  | 10 | RDR2-sensitive |
| GTCATCAAGCAGACTGTTGCGCGA    | 0  | 11 | RDR2-sensitive |
| GTCATCAGATTGTCGACGACGGTT    | 0  | 11 | RDR2-sensitive |
| GTCATCATTAGATCTAGATCCGAT    | 0  | 14 | RDR2-sensitive |
| GTCATCCGGTTGTAGGTGACGTC     | 2  | 91 | RDR2-sensitive |
| GTCATCTATGTGGCGTAGCTCGGC    | 0  | 15 | RDR2-sensitive |
| GTCATGGGCTACGATTGATCCGTA    | 0  | 12 | RDR2-sensitive |
| GTCATGTTAGTCCGGTCCGGTGGC    | 0  | 25 | RDR2-sensitive |
| GTCATGTTCTGACGGGCTAAAAC     | 0  | 11 | RDR2-sensitive |
| GTCATTAAGACTGATCGTGTTGGT    | 1  | 12 | RDR2-sensitive |
| GTCATTCGAGCTGTGGAGGACGGC    | 0  | 21 | RDR2-sensitive |
| GTCATTCGGCTGCAGCTTCGGCAT    | 0  | 14 | RDR2-sensitive |
| GTCATTGTACGTTCCGACTGGACA    | 0  | 9  | RDR2-sensitive |
| GTCATTTTCGACGGTCTCTGGCAC    | 0  | 12 | RDR2-sensitive |
| GTCCAAACAGTATGGGTCGTCCGG    | 0  | 26 | RDR2-sensitive |
| GTCCAAATGGGTGGATCGTTCGG     | 0  | 14 | RDR2-sensitive |
| GTCCAAGACACCTCTGATCCGGCAT   | 1  | 12 | RDR2-sensitive |
| GTCCAATCGAAGGGTGACACGCAT    | 0  | 12 | RDR2-sensitive |

|                            |    |     |                |
|----------------------------|----|-----|----------------|
| GTCCACGGTCCGGACTGTCCGCGG   | 0  | 28  | RDR2-sensitive |
| GTCCACGGTTGGGAGGCAGAACGG   | 0  | 14  | RDR2-sensitive |
| GTCCACGTCCGGGGGCTCGGACGGT  | 0  | 10  | RDR2-sensitive |
| GTCCACTCTGTAACAACGGTCCAA   | 0  | 18  | RDR2-sensitive |
| GTCCACTGTAGAGGCATACTGGAC   | 0  | 9   | RDR2-sensitive |
| GTCCACTGTAGAGGCATACTGGGT   | 0  | 14  | RDR2-sensitive |
| GTCCAGGACGTGGGGAACGCGCAT   | 0  | 11  | RDR2-sensitive |
| GTCCATCGGACGTGAGGCAGCGGC   | 15 | 0   | RDR2-resistant |
| GTCCATGACTCGGGACTGGATGGT   | 0  | 9   | RDR2-sensitive |
| GTCCATGGTATAGGACTGGACGGT   | 0  | 11  | RDR2-sensitive |
| GTCCATGTCTAGATCGTGCCGGAT   | 0  | 29  | RDR2-sensitive |
| GTCCATGTCTAGATCGTGCCGGGC   | 0  | 125 | RDR2-sensitive |
| GTCCATGTCTGGAGCTCGGACGGC   | 0  | 16  | RDR2-sensitive |
| GTCCATTGATGGCGTCCGCGTTTT   | 0  | 9   | RDR2-sensitive |
| GTCCCAATCTGGCGCGGCTGTGAG   | 0  | 9   | RDR2-sensitive |
| GTCCCAGTAGGACTGTAGGAGGCT   | 0  | 11  | RDR2-sensitive |
| GTCCCAGTCGGAGGGTGGCGCGCA   | 0  | 10  | RDR2-sensitive |
| GTCCCAGTTATGGACCATCTGGAC   | 0  | 18  | RDR2-sensitive |
| GTCCCATCGTACGGAGAGAGGCC    | 0  | 11  | RDR2-sensitive |
| GTCCCATCGTATGGAGAGAGGCAC   | 0  | 12  | RDR2-sensitive |
| GTCCCATGCGGTCGACGGACATGA   | 0  | 25  | RDR2-sensitive |
| GTCCCGGAAGACGGCGAACTCCGC   | 16 | 80  | RDR2-sensitive |
| GTCCCGGACCTGTAGAATACCGGA   | 0  | 39  | RDR2-sensitive |
| GTCCCGGGTTGCAATTCGATGGCG   | 15 | 0   | RDR2-resistant |
| GTCCCTAGTTGGAGTGTGGCGC     | 0  | 13  | RDR2-sensitive |
| GTCCCTCGAACGGTCGCCGGGAAG   | 0  | 9   | RDR2-sensitive |
| GTCCCTGTTTCTGTTTGACCGCAT   | 0  | 15  | RDR2-sensitive |
| GTCCCTTAGGGATGTGTTTCGTCTGA | 0  | 55  | RDR2-sensitive |
| GTCCCTTGGGATATGTTTCGTCTGAG | 1  | 27  | RDR2-sensitive |
| GTCCCTTGGGATGTGTTTCGTCTGAG | 1  | 33  | RDR2-sensitive |
| GTCCCTTGGGGATATGTTTCGTCTGA | 1  | 110 | RDR2-sensitive |
| GTCCCTTGGGGATGTGTTTCGTCTGA | 3  | 185 | RDR2-sensitive |
| GTCCCTTGGGTCGAGCTCGGCAAC   | 1  | 16  | RDR2-sensitive |
| GTCCCTTTGATAAAGCGTCCGCAC   | 0  | 12  | RDR2-sensitive |
| GTCCGACACGACGGTACTGGTCTA   | 0  | 13  | RDR2-sensitive |
| GTCCGACGGTCCTGTAGGAGGCCA   | 3  | 17  | RDR2-sensitive |
| GTCCGAGACCAATGGCAGAACGTC   | 0  | 9   | RDR2-sensitive |
| GTCCGAGCTCTAGAGTGGAAACCGT  | 0  | 22  | RDR2-sensitive |
| GTCCGATGCCCTACTGTAGACGGT   | 0  | 25  | RDR2-sensitive |
| GTCCGATTCGGTGAACAGTAGGTT   | 0  | 10  | RDR2-sensitive |
| GTCCGCCCCTGTAGATCAACGGCT   | 0  | 50  | RDR2-sensitive |
| GTCCGCGACCTGGAGCAGGGGCAA   | 0  | 9   | RDR2-sensitive |
| GTCCGCGACTGTGGCCGGACGGT    | 0  | 12  | RDR2-sensitive |
| GTCCGCGCCTGTAGATCAACGGCT   | 5  | 28  | RDR2-sensitive |
| GTCCGCGGACTTAGACGGCCCGAA   | 0  | 14  | RDR2-sensitive |
| GTCCGCGGCTAGGGACCGAACGGC   | 0  | 41  | RDR2-sensitive |
| GTCCGCGGTCCGGACTGTCCACGG   | 1  | 12  | RDR2-sensitive |
| GTCCGGAAGAGTAGGTACGCGGCA   | 0  | 10  | RDR2-sensitive |
| GTCCGGAATAGTCGGAAACGGAAA   | 0  | 9   | RDR2-sensitive |

|                          |   |    |                |
|--------------------------|---|----|----------------|
| GTCCGGAATAGTCGGGAACGGAAA | 0 | 18 | RDR2-sensitive |
| GTCCGGACATAACGTAGGGGCTAG | 0 | 10 | RDR2-sensitive |
| GTCCGGACGTACATAGAGAAGGAG | 0 | 10 | RDR2-sensitive |
| GTCCGGACGTACGCAAAGGAGGAG | 0 | 11 | RDR2-sensitive |
| GTCCGGACGTACGCAGAGGAGGAG | 1 | 13 | RDR2-sensitive |
| GTCCGGACGTACGCAGATGAGGAG | 0 | 10 | RDR2-sensitive |
| GTCCGGACGTACGTAGAGAAGGAG | 2 | 19 | RDR2-sensitive |
| GTCCGGACGTCAGGCAGGGAACGC | 0 | 10 | RDR2-sensitive |
| GTCCGGACTGTCCGCGGTGGTGGC | 5 | 26 | RDR2-sensitive |
| GTCCGGAGGCAGAACACGTCAGAG | 0 | 9  | RDR2-sensitive |
| GTCCGGATATAACTCCCGAGGACG | 2 | 17 | RDR2-sensitive |
| GTCCGGATTGAAGGCAAAGCCAGC | 0 | 9  | RDR2-sensitive |
| GTCCGGCACGGTAGAATAAGCGGG | 0 | 15 | RDR2-sensitive |
| GTCCGGGCTCTGCGAGCGTAGCAT | 0 | 11 | RDR2-sensitive |
| GTCCGGGCTGTGAGAGGAGGGGAA | 0 | 10 | RDR2-sensitive |
| GTCCGGTCTGTATATGCAGGGGTC | 0 | 11 | RDR2-sensitive |
| GTCCGGTGACGTAGAGAGCATCAG | 2 | 19 | RDR2-sensitive |
| GTCCGGTGCGCCAGACTGACTCGG | 1 | 12 | RDR2-sensitive |
| GTCCGGTGCGCCAGGCTGACTCGG | 0 | 17 | RDR2-sensitive |
| GTCCGTCCGGCATACTCGTCAG   | 0 | 9  | RDR2-sensitive |
| GTCCGTGATGCCACAGATGATCGT | 0 | 10 | RDR2-sensitive |
| GTCCGTGGCTCTGGGCAGGATGGT | 0 | 14 | RDR2-sensitive |
| GTCCGTTGGTGGCTGATCGAACGG | 0 | 11 | RDR2-sensitive |
| GTCCTAATCTGACGCGGCTGTGAG | 0 | 9  | RDR2-sensitive |
| GTCCTCCGGTTGTAGGTGACGTC  | 0 | 15 | RDR2-sensitive |
| GTCCTCCTGGCAGCACTCGGCAAA | 0 | 9  | RDR2-sensitive |
| GTCCTCTGTAGATTGCGTACCAAG | 0 | 9  | RDR2-sensitive |
| GTCCTGATCTGAACGCCGAGCGTA | 0 | 10 | RDR2-sensitive |
| GTCCTGCAGAACACTACAGAACGG | 0 | 10 | RDR2-sensitive |
| GTCCTGCTCGGGATCGTTGGGTAA | 0 | 15 | RDR2-sensitive |
| GTCCTGGACCTGTAGAATACCGGA | 0 | 21 | RDR2-sensitive |
| GTCCTGTGAGCACGGCACTGTAC  | 0 | 10 | RDR2-sensitive |
| GTCCTTACTGGTTTGGTCGTTTGG | 0 | 10 | RDR2-sensitive |
| GTCCTTCGGCGGAACCGTGGCATG | 0 | 12 | RDR2-sensitive |
| GTCCTTGCTGGTTTGGTCGTTTGG | 0 | 32 | RDR2-sensitive |
| GTCCTTGTCGGCGGGCAGCACTAG | 0 | 20 | RDR2-sensitive |
| GTCCTTGCTGCGGACTGCGGCGC  | 0 | 12 | RDR2-sensitive |
| GTCGAACCATATCGTTCGTCGGG  | 0 | 23 | RDR2-sensitive |
| GTCGAACTACTTGGACCGTCGGGC | 0 | 10 | RDR2-sensitive |
| GTCGAAGACTGGATGTAGAGACGT | 0 | 12 | RDR2-sensitive |
| GTCGAAGCCGCATCTGAGGACATC | 0 | 12 | RDR2-sensitive |
| GTCGAATACTGGATGTAGGACGT  | 0 | 9  | RDR2-sensitive |
| GTCGAATCGGCGCAGAGGCTGCTT | 5 | 19 | RDR2-sensitive |
| GTCGACAACGGCCTGCAGCATCGC | 0 | 10 | RDR2-sensitive |
| GTCGACGACGGACGGCGTAATTCC | 0 | 12 | RDR2-sensitive |
| GTCGACGACTGTAGCAAATGGTT  | 2 | 23 | RDR2-sensitive |
| GTCGACGCTCGGGGTGAAGAAGAC | 0 | 10 | RDR2-sensitive |
| GTCGACGTGGAACCGAGCTCGGCG | 1 | 24 | RDR2-sensitive |
| GTCGACGTGGCACCGAGCTCGGCG | 2 | 21 | RDR2-sensitive |

|                          |    |     |                |
|--------------------------|----|-----|----------------|
| GTCGACGTGGCACTGAGCTCGGCG | 0  | 9   | RDR2-sensitive |
| GTCGAGACCACCGGATCGGAGGAG | 0  | 35  | RDR2-sensitive |
| GTCGAGATTGACGGCAGAACGGAT | 0  | 14  | RDR2-sensitive |
| GTCGAGCACGGCACTGTACAGGCT | 0  | 9   | RDR2-sensitive |
| GTCGAGCCGGACCAGGTCCAGACG | 0  | 10  | RDR2-sensitive |
| GTCGAGCCGGACGGTCCACATGTG | 0  | 9   | RDR2-sensitive |
| GTCGAGCGGATTGACGTCATGTAA | 0  | 11  | RDR2-sensitive |
| GTCGAGCTTAGTGCTACGTCGGCG | 0  | 9   | RDR2-sensitive |
| GTCGAGTCGTGGACTGACCCAGGC | 0  | 9   | RDR2-sensitive |
| GTCGAGTCGTGGACTGACCCAGGC | 0  | 9   | RDR2-sensitive |
| GTCGAGTGTCGGCTGACAGTTGGC | 1  | 13  | RDR2-sensitive |
| GTCGATCATGGCTAGACTGGAGGC | 1  | 24  | RDR2-sensitive |
| GTCGATCCATCTGGGCTGGGGCAC | 0  | 11  | RDR2-sensitive |
| GTCGATCCGCGGTGCTGTTACGG  | 0  | 9   | RDR2-sensitive |
| GTCGATCGTTGGTCACTTGGCACA | 0  | 9   | RDR2-sensitive |
| GTCGATGCGGCACAGCAGGACGAC | 0  | 14  | RDR2-sensitive |
| GTCGATTAAGGGCGTGTTTGGCAT | 0  | 14  | RDR2-sensitive |
| GTCGATTAGAGGAGTCTAGGTCGG | 2  | 42  | RDR2-sensitive |
| GTCGATTGAGAGCAGCGTAGGCGT | 0  | 12  | RDR2-sensitive |
| GTCGCACTCGGTAAAGATAGGCTC | 1  | 18  | RDR2-sensitive |
| GTCGCATGTCGGTCTTTGTCGGA  | 0  | 10  | RDR2-sensitive |
| GTCGCCAACGTCGACGACTCTCGG | 3  | 18  | RDR2-sensitive |
| GTCGCGTAGGACAGTTCGGCTAGA | 0  | 9   | RDR2-sensitive |
| GTCGCGTAGGACAGTTCGGCTAGG | 8  | 74  | RDR2-sensitive |
| GTCGCGTTGCGATTAGATCGCGGT | 0  | 9   | RDR2-sensitive |
| GTCGCTATAGATATCGTCGGGGAC | 0  | 41  | RDR2-sensitive |
| GTCGCTATAGATGTCGTCGGGGAC | 0  | 9   | RDR2-sensitive |
| GTCGCTCAAGTCTGATCGCTCGTC | 20 | 1   | RDR2-resistant |
| GTCGCTTCGTTGGGCTTCATGGTA | 0  | 15  | RDR2-sensitive |
| GTCGGAACGATTCCGAGCCGGATT | 0  | 10  | RDR2-sensitive |
| GTCGGTCCGCTTGTAGTGTGCGGG | 0  | 14  | RDR2-sensitive |
| GTCGTAAAGATCGGGCATCGTGAC | 0  | 9   | RDR2-sensitive |
| GTCGTACAGCGGCAATAGAGCAAG | 0  | 10  | RDR2-sensitive |
| GTCGTAGAACATGACCACGGCCAC | 0  | 9   | RDR2-sensitive |
| GTCGTAGACTCATGATCGAGCGGC | 0  | 36  | RDR2-sensitive |
| GTCGTAGATCTTTGGTGGACGTT  | 0  | 16  | RDR2-sensitive |
| GTCGTGAAGATCGGGCATCGTGAC | 9  | 108 | RDR2-sensitive |
| GTCGTGAAGATCGGGCATCGTGCC | 0  | 15  | RDR2-sensitive |
| GTCGTGCTCGGACAGAAGAGTCAG | 0  | 11  | RDR2-sensitive |
| GTCGTGCTCGGACCGGACTGGCAC | 0  | 10  | RDR2-sensitive |
| GTCGTGTGCGGACCTGGACGGCTC | 4  | 27  | RDR2-sensitive |
| GTCGTGTCTCTGGCGGCAGAGCTC | 0  | 10  | RDR2-sensitive |
| GTCGTTCTCAGGTCAGAGTGGCA  | 0  | 11  | RDR2-sensitive |
| GTCGTTCTTACAGCGAGGTCGCGG | 0  | 26  | RDR2-sensitive |
| GTCGTTTAAAACCGTCGGAGGCAA | 0  | 20  | RDR2-sensitive |
| GTCGTTTAGGACATGATTGTGCAT | 0  | 15  | RDR2-sensitive |
| GTCTAAATGGACTGGATATCGGAT | 0  | 15  | RDR2-sensitive |
| GTCTAAGACACTCGGCAAAGGCTA | 1  | 18  | RDR2-sensitive |
| GTCTAAGCTCGGACGAGTCGTCAT | 0  | 11  | RDR2-sensitive |

|                           |    |    |                |
|---------------------------|----|----|----------------|
| GTCTACCACCTGTAGCCTGACGGT  | 0  | 10 | RDR2-sensitive |
| GTCTACCGTAGCGGCACGAACCAT  | 0  | 12 | RDR2-sensitive |
| GTCTAGAAGCTCTGGATGACGCAT  | 0  | 11 | RDR2-sensitive |
| GTCTAGATCGTGCCGGACCGGCC   | 0  | 10 | RDR2-sensitive |
| GTCTAGATCGTGCCGGCCGGCCC   | 0  | 56 | RDR2-sensitive |
| GTCTAGATTGTATCGGTGCGTGCA  | 0  | 17 | RDR2-sensitive |
| GTCTAGCGGACCAGTCTAAGGCAT  | 0  | 10 | RDR2-sensitive |
| GTCTAGCGGGCTGGTCCGAGGCAC  | 1  | 15 | RDR2-sensitive |
| GTCTAGCTCAGTCGGTAGAGTGCA  | 0  | 13 | RDR2-sensitive |
| GTCTAGTCGTTTTGGTAGAGCGGT  | 0  | 20 | RDR2-sensitive |
| GTCTAGTGGACTGGCACTCGGCAA  | 0  | 9  | RDR2-sensitive |
| GTCTAGTGTCGGATCGGCCATGC   | 0  | 21 | RDR2-sensitive |
| GTCTATACCGTGTCCGGCTAGGCT  | 0  | 26 | RDR2-sensitive |
| GTCTATAGCGTCCGGTTACCAGAA  | 15 | 0  | RDR2-resistant |
| GTCTATCGCGTAGGACAGTTCGGC  | 1  | 13 | RDR2-sensitive |
| GTCTATCGCTCAGGACCAGACGGT  | 0  | 13 | RDR2-sensitive |
| GTCTATCGGAGTAGAAGACGCCAT  | 0  | 9  | RDR2-sensitive |
| GTCTATCGTACACACCGTCTGGAG  | 0  | 10 | RDR2-sensitive |
| GTCTATGATTTGTGGGTCCGATGG  | 1  | 31 | RDR2-sensitive |
| GTCTATGTTGATGATCGCGAGGAG  | 53 | 0  | RDR2-resistant |
| GTCTATTCCGCTGTAGATGGGCCGC | 1  | 42 | RDR2-sensitive |
| GTCTATTGTCGGGTCGGGTTGGCT  | 0  | 9  | RDR2-sensitive |
| GTCTCAGATTGTGGATGGACAGCA  | 0  | 14 | RDR2-sensitive |
| GTCTCAGCGGAAGAACAGCTACAG  | 0  | 13 | RDR2-sensitive |
| GTCTCAGTACTAGAACAGAGCGGT  | 0  | 10 | RDR2-sensitive |
| GTCTCATCTGACTTCTGACGGTAG  | 0  | 11 | RDR2-sensitive |
| GTCTCATGGACCTCGCGGACGAAC  | 23 | 2  | RDR2-resistant |
| GTCTCCTGATTGTGGTCCAGCGGT  | 0  | 14 | RDR2-sensitive |
| GTCTCGAAGCGGACTGGATCAGGC  | 0  | 9  | RDR2-sensitive |
| GTCTCGACGAGCTGTACATCGGCA  | 1  | 12 | RDR2-sensitive |
| GTCTCGGAAACTGTACATCGGCAA  | 0  | 10 | RDR2-sensitive |
| GTCTCGGACGGGCCTGACTGCGGA  | 0  | 10 | RDR2-sensitive |
| GTCTCGGCAAACGTATATTGGCA   | 0  | 14 | RDR2-sensitive |
| GTCTCGGTTTGGCTCAGAGCGGCT  | 0  | 19 | RDR2-sensitive |
| GTCTCGTCTTTAATCTTCGGCTG   | 21 | 53 | RDR2-sensitive |
| GTCTCGTTGGAAGACGCTTGATGT  | 0  | 17 | RDR2-sensitive |
| GTCTCGTTGGACATGCATGAGGAG  | 0  | 13 | RDR2-sensitive |
| GTCTCGTTTGGACTTCCGGACGGG  | 0  | 9  | RDR2-sensitive |
| GTCTCGTTTGGACTTCCGGCCGGG  | 1  | 13 | RDR2-sensitive |
| GTCTCGTTTGGACTTTCGGCCGGG  | 0  | 13 | RDR2-sensitive |
| GTCTCTATCGTTGGCCCGTGCATG  | 0  | 17 | RDR2-sensitive |
| GTCTCTATTGTCGGCTGGGGCATA  | 0  | 14 | RDR2-sensitive |
| GTCTCTCGGCTATAGTTTTGGCAT  | 43 | 9  | RDR2-resistant |
| GTCTCTCTGGATTGCAGTTGCAGC  | 0  | 10 | RDR2-sensitive |
| GTCTCTGTAGAGTGGCAGATTCGA  | 28 | 0  | RDR2-resistant |
| GTCTCTGTAGCTAGATCGCGGACA  | 0  | 9  | RDR2-sensitive |
| GTCTCTGTCAGACCAGCGACTGCA  | 2  | 46 | RDR2-sensitive |
| GTCTCTGTCGGACCAGCGGCTGCA  | 6  | 69 | RDR2-sensitive |
| GTCTCTTCGGACTCAAGTCGGCAT  | 0  | 9  | RDR2-sensitive |

|                           |     |     |                |
|---------------------------|-----|-----|----------------|
| GTCTCTTTTCGCTCGGCCAAGACGC | 0   | 9   | RDR2-sensitive |
| GTCTCTTTTCGCTCGGCCAGGCCAT | 0   | 9   | RDR2-sensitive |
| GTCTCTTTCTGCAGGACCTTCGGC  | 0   | 21  | RDR2-sensitive |
| GTCTGAACCCCAGACACGGACCGC  | 0   | 9   | RDR2-sensitive |
| GTCTGAAGAGCTGCAAGCCTGCAT  | 0   | 10  | RDR2-sensitive |
| GTCTGAATCTGGTGCGGCGGAACC  | 0   | 10  | RDR2-sensitive |
| GTCTGACCGTCTACAGTAGGGCAT  | 5   | 46  | RDR2-sensitive |
| GTCTGACGGACCGAACCCAACGGA  | 0   | 41  | RDR2-sensitive |
| GTCTGACGGGTCGGCCTGAGGCAT  | 0   | 14  | RDR2-sensitive |
| GTCTGAGACTCGGACGGTCCGTGT  | 0   | 15  | RDR2-sensitive |
| GTCTGATCGTGCCCTGGGACGTGCC | 0   | 10  | RDR2-sensitive |
| GTCTGATGGGTCGGCCCGAAGCAC  | 0   | 9   | RDR2-sensitive |
| GTCTGATGGGTCGGCCCGAATCAC  | 0   | 10  | RDR2-sensitive |
| GTCTGATTAGTTGGATAAACGGAC  | 0   | 9   | RDR2-sensitive |
| GTCTGATTGGTCGGTCCGAAGCAC  | 0   | 9   | RDR2-sensitive |
| GTCTGCACCGGTTGAGACGCTCAT  | 0   | 12  | RDR2-sensitive |
| GTCTGCACGACTGGGCCAGTGACG  | 16  | 0   | RDR2-resistant |
| GTCTGCGAACTTTGAGGTCGGCAA  | 4   | 19  | RDR2-sensitive |
| GTCTGCGACGACTGTGTACGGCTA  | 0   | 12  | RDR2-sensitive |
| GTCTGCGGCTCTGGCGTTGGCGTC  | 0   | 16  | RDR2-sensitive |
| GTCTGCGGCTCTGGGCCGAACGGT  | 0   | 11  | RDR2-sensitive |
| GTCTGCGGTGACTGGGACGAGCA   | 0   | 11  | RDR2-sensitive |
| GTCTGCTCGATGGCGCACCGGACA  | 0   | 10  | RDR2-sensitive |
| GTCTGCTCGTCCATGCTGTCCGCC  | 0   | 9   | RDR2-sensitive |
| GTCTGCTGGCCTGACACTCGGCAA  | 0   | 10  | RDR2-sensitive |
| GTCTGGAAGGGTGATTGTCTGTTGG | 1   | 35  | RDR2-sensitive |
| GTCTGGACTCTGGACCACTCAGGA  | 0   | 11  | RDR2-sensitive |
| GTCTGGATCAACGCGTAGCTTCAT  | 0   | 15  | RDR2-sensitive |
| GTCTGGCGAGCTGACGCAAGTGAC  | 0   | 9   | RDR2-sensitive |
| GTCTGGCGGAAGTGCGGAGTCTGG  | 0   | 14  | RDR2-sensitive |
| GTCTGGCGGGCTGATCCGGGGCAC  | 0   | 12  | RDR2-sensitive |
| GTCTGGCGGGCTGGACCAAAACGG  | 0   | 27  | RDR2-sensitive |
| GTCTGGCGGGCTGGTCCGAGGCAC  | 1   | 18  | RDR2-sensitive |
| GTCTGGCTCTGACCGGTCTGCTGC  | 37  | 0   | RDR2-resistant |
| GTCTGGGACAGCACGATCTGACGG  | 0   | 10  | RDR2-sensitive |
| GTCTGGGTGGTGTAGTTGGTTATC  | 418 | 45  | RDR2-resistant |
| GTCTGGGTTGTGTAGTTGGTTATC  | 34  | 2   | RDR2-resistant |
| GTCTGGTATGGCTCTAGAGCAGAA  | 0   | 45  | RDR2-sensitive |
| GTCTGGTCGCTGGGACAGGCGCGC  | 1   | 20  | RDR2-sensitive |
| GTCTGGTCGGAAGCATGGCGCGAT  | 0   | 14  | RDR2-sensitive |
| GTCTGGTGGACTGGCACTCGGCAA  | 0   | 39  | RDR2-sensitive |
| GTCTGTAGACTGGAGCAGCAGGAA  | 0   | 9   | RDR2-sensitive |
| GTCTGTAGATTATGTCCGACGGCT  | 0   | 23  | RDR2-sensitive |
| GTCTGTAGCAACGCGAATAGCGGA  | 1   | 12  | RDR2-sensitive |
| GTCTGTAGCAGCTTTTGATGGCCA  | 0   | 12  | RDR2-sensitive |
| GTCTGTAGCAGCTTTTGGTGGCCA  | 1   | 27  | RDR2-sensitive |
| GTCTGTAGGATCTAGGACACCGGC  | 0   | 18  | RDR2-sensitive |
| GTCTGTATCTCGGATTTCTGGGCAC | 0   | 114 | RDR2-sensitive |
| GTCTGTATGCACTCAGGGGCGGAG  | 2   | 414 | RDR2-sensitive |



|                           |     |    |                |
|---------------------------|-----|----|----------------|
| GTCTGTATGCACTCAGGGGCGGCG  | 1   | 19 | RDR2-sensitive |
| GTCTGTATGCACTCAGGGGCGGGG  | 0   | 15 | RDR2-sensitive |
| GTCTGTATGGACGGATTGAGAGAC  | 0   | 11 | RDR2-sensitive |
| GTCTGTCAAGCGTTGGAAGTGGTG  | 0   | 13 | RDR2-sensitive |
| GTCTGTCAGGTGGGCCTCGGGCGG  | 1   | 20 | RDR2-sensitive |
| GTCTGTCCGTGAGCCGAAGTCTGA  | 0   | 18 | RDR2-sensitive |
| GTCTGTCCTGGATTGGTTCGGTAG  | 0   | 11 | RDR2-sensitive |
| GTCTGTGCGAGCTTTAGAGGTGGTG | 0   | 13 | RDR2-sensitive |
| GTCTGTGCGAGCTTTGGAGGTGGTG | 0   | 22 | RDR2-sensitive |
| GTCTGTGCGGTAGGACAATTCGGC  | 1   | 33 | RDR2-sensitive |
| GTCTGTGCGGTAGGACAGTTCGGC  | 0   | 20 | RDR2-sensitive |
| GTCTGTGCGCTCATGTGTGGACGGT | 0   | 34 | RDR2-sensitive |
| GTCTGTCTGGCCTCAGAAGAGCTG  | 0   | 15 | RDR2-sensitive |
| GTCTGTGAACTGCGCTGCGACGGA  | 0   | 14 | RDR2-sensitive |
| GTCTGTGACTCTGGGCCAGACGGT  | 2   | 25 | RDR2-sensitive |
| GTCTGTGATTCTGACCGTCGACGT  | 0   | 13 | RDR2-sensitive |
| GTCTGTGGATATGGACCGGAAGGT  | 0   | 11 | RDR2-sensitive |
| GTCTGTGGCACAGGGTTGGACGGT  | 0   | 14 | RDR2-sensitive |
| GTCTGTGGGCTGGTACGACACGAC  | 0   | 9  | RDR2-sensitive |
| GTCTGTGTCTATGATTTGTGGGTC  | 4   | 18 | RDR2-sensitive |
| GTCTGTTAGCTCGTCGGCCATT    | 0   | 9  | RDR2-sensitive |
| GTCTGTTTCGTTGCACTGCGGCGC  | 0   | 11 | RDR2-sensitive |
| GTCTGTTGGATTGTTATTCAGGCT  | 215 | 29 | RDR2-resistant |
| GTCTGTTGGTTCGGATGGTCTTCGC | 0   | 14 | RDR2-sensitive |
| GTCTGTTGTGTACTGTAATGGCTA  | 0   | 11 | RDR2-sensitive |
| GTCTGTTGTTGGAGAGGTAGCGGA  | 0   | 21 | RDR2-sensitive |
| GTCTGTTTGGCAGAACTTCGGCTT  | 4   | 60 | RDR2-sensitive |
| GTCTTAACTACGGACTTAGACGGT  | 142 | 24 | RDR2-resistant |
| GTCTTAGGTGGACTGGACAGCATG  | 3   | 23 | RDR2-sensitive |
| GTCTTAGTTCGTCGAGACTGGCAC  | 0   | 10 | RDR2-sensitive |
| GTCTTATGGACTGTAGTTGCAGCA  | 2   | 14 | RDR2-sensitive |
| GTCTTATTATCTGACGACTGAGGA  | 0   | 14 | RDR2-sensitive |
| GTCTTCAATTCGTCGACTTCGGA   | 39  | 3  | RDR2-resistant |
| GTCTTCACGCTGTAGAAGAGGGTA  | 0   | 15 | RDR2-sensitive |
| GTCTTCACGTCGGATAGCGGAGCA  | 0   | 13 | RDR2-sensitive |
| GTCTTCATACTGTAGAAGAGGGTA  | 0   | 39 | RDR2-sensitive |
| GTCTTCATACTGTAGTAAGAGGTA  | 0   | 17 | RDR2-sensitive |
| GTCTTCATACTGTAGTAAGGGGTA  | 2   | 65 | RDR2-sensitive |
| GTCTTCATGCTGTAGAAGAGGGTA  | 2   | 35 | RDR2-sensitive |
| GTCTTCATGCTGTAGGAGAGGGTA  | 0   | 20 | RDR2-sensitive |
| GTCTTCATGCTGTAGTAAGGGGTA  | 0   | 16 | RDR2-sensitive |
| GTCTTCATGCTGTAGTAAGGTGTA  | 0   | 36 | RDR2-sensitive |
| GTCTTCGTCACTGTCATCCGCGGC  | 0   | 41 | RDR2-sensitive |
| GTCTTCGTCGTGTCCTTCTCCGGC  | 2   | 19 | RDR2-sensitive |
| GTCTTCGTTGGACCGTGTCCGCC   | 0   | 46 | RDR2-sensitive |
| GTCTTGCGGATTTACTCGACGGTG  | 0   | 22 | RDR2-sensitive |
| GTCTTGCTATCATCGTTCGGTCAC  | 0   | 9  | RDR2-sensitive |
| GTCTTGGATATAGAGTTGTAGGCT  | 48  | 2  | RDR2-resistant |
| GTCTTGGTCGTCGATGCCACGCAA  | 2   | 21 | RDR2-sensitive |

|                           |    |    |                |
|---------------------------|----|----|----------------|
| GTCTTGTCGGCTTATGGTTGGTGT  | 1  | 26 | RDR2-sensitive |
| GTCTTGTAATTGGGAACGGGCAT   | 1  | 12 | RDR2-sensitive |
| GTCTTTACGGTCTGTTTTGAGGAT  | 0  | 11 | RDR2-sensitive |
| GTCTTTATAGATTGTAGCCGCGGC  | 0  | 12 | RDR2-sensitive |
| GTCTTTATGCTGTAGTAAGGGGTA  | 1  | 28 | RDR2-sensitive |
| GTCTTTGGAAGGCTGTAGTCGGGC  | 13 | 55 | RDR2-sensitive |
| GTCTTTGGACTGTGCTAGCCCGGC  | 0  | 13 | RDR2-sensitive |
| GTCTTTGTCGTCTTGGATCAGGCT  | 0  | 9  | RDR2-sensitive |
| GTCTTTTGTCGGGCATTCCAAGGC  | 3  | 16 | RDR2-sensitive |
| GTCTTTTTAAGGGTTAAGTCGGA   | 0  | 12 | RDR2-sensitive |
| GTCTTTTTCGCTCGGTCACGGTCA  | 0  | 35 | RDR2-sensitive |
| GTGAAAAAAGTTGCTGTGGGCTGT  | 1  | 43 | RDR2-sensitive |
| GTGAACAGGCATCTTCGGACTCAA  | 0  | 15 | RDR2-sensitive |
| GTGAACAGGTATCCTCGGACTCAA  | 0  | 18 | RDR2-sensitive |
| GTGAACAGGTATCTTCGGACTCAA  | 1  | 24 | RDR2-sensitive |
| GTGAACGACGCAACGACGAACGAC  | 0  | 24 | RDR2-sensitive |
| GTGAACGGAACGGAGCATGACTGC  | 0  | 12 | RDR2-sensitive |
| GTGAACGGAACGGAGCGTGACTGT  | 3  | 19 | RDR2-sensitive |
| GTGAACGGGACGACTGTGAAGACG  | 0  | 24 | RDR2-sensitive |
| GTGAACTACTCGTCTGAAGGCTGG  | 0  | 11 | RDR2-sensitive |
| GTGAACTTGTTGGGCGGAGACGAC  | 0  | 22 | RDR2-sensitive |
| GTGAAGACGACAGTAGAGGCGAGA  | 0  | 14 | RDR2-sensitive |
| GTGAAGATCGGGCATCGTGACGCA  | 7  | 44 | RDR2-sensitive |
| GTGAAGATGTCGGCATACTGTGAT  | 0  | 10 | RDR2-sensitive |
| GTGAAGGAGACGTAGAAGAGACGC  | 0  | 10 | RDR2-sensitive |
| GTGAAGGCTGCAGTCGACGGGCGC  | 0  | 9  | RDR2-sensitive |
| GTGAAGGGCTACGGCGATTAACTC  | 0  | 9  | RDR2-sensitive |
| GTGAAGGTAGACCCTGTTGATGGC  | 28 | 4  | RDR2-resistant |
| GTGAAGTCCGACTGTCCGGTGTG   | 52 | 10 | RDR2-resistant |
| GTGAATATGACTGCGGAAGATTGT  | 0  | 9  | RDR2-sensitive |
| GTGAATCTGAGCGTCGGCAGGGGC  | 36 | 6  | RDR2-resistant |
| GTGAATGCTGGGAACACGGGAGAA  | 1  | 14 | RDR2-sensitive |
| GTGAATTGCTGATCCTGGCACGTA  | 2  | 38 | RDR2-sensitive |
| GTGACAAGTTCTCTGAAAAGGCCGA | 33 | 7  | RDR2-resistant |
| GTGACAGGTGTCTTAGTTCGTCGA  | 0  | 9  | RDR2-sensitive |
| GTGACAGTGACAGGGGCGACGACA  | 42 | 9  | RDR2-resistant |
| GTGACCAGACTGACTCGAAGGCGC  | 0  | 14 | RDR2-sensitive |
| GTGACCAGAGACTGTAAATGTGGC  | 1  | 16 | RDR2-sensitive |
| GTGACCGACTGTGGGGGCAGATAT  | 0  | 32 | RDR2-sensitive |
| GTGACCTAGATCTGGCGAAGGCGT  | 0  | 35 | RDR2-sensitive |
| GTGACCTCGGCGCAGGAGCTGCAC  | 0  | 11 | RDR2-sensitive |
| GTGACCTGGGATCTACGTGGCATG  | 0  | 11 | RDR2-sensitive |
| GTGACGACAAGACTCATCGGCAGC  | 0  | 13 | RDR2-sensitive |
| GTGACGACGAGGAACACGAGCGGA  | 0  | 10 | RDR2-sensitive |
| GTGACGACTTAGGCATGCTACCGA  | 0  | 9  | RDR2-sensitive |
| GTGACGATTGACGACGCGAGCAGA  | 0  | 15 | RDR2-sensitive |
| GTGACCGGTAGGACGTAACCCGGT  | 0  | 46 | RDR2-sensitive |
| GTGACGGACTTATTTGGGCGGTC   | 0  | 23 | RDR2-sensitive |
| GTGACGGATTATATTCAGACTGCA  | 38 | 4  | RDR2-resistant |

|                            |    |    |                |
|----------------------------|----|----|----------------|
| GTGACGGCGTCTGTACACGGGAAC   | 15 | 0  | RDR2-resistant |
| GTGACTAACTGTGGTGGATGACAT   | 0  | 15 | RDR2-sensitive |
| GTGACTAGGGAACGTCGTACGGGC   | 0  | 20 | RDR2-sensitive |
| GTGACTCGACTGACCGGACACGGT   | 0  | 11 | RDR2-sensitive |
| GTGACTCGATTGTCCGGACACCGT   | 0  | 9  | RDR2-sensitive |
| GTGACTCTGGACTIONGACGGTTCAC | 1  | 49 | RDR2-sensitive |
| GTGACTCTGTACCGAGCCGGCCCCG  | 0  | 17 | RDR2-sensitive |
| GTGACTGACGACCGAGAAGCGGTT   | 0  | 16 | RDR2-sensitive |
| GTGACTGAGCCGGCCTAGACAGAC   | 0  | 9  | RDR2-sensitive |
| GTGACTGATGTAGATATAGGGCCT   | 0  | 12 | RDR2-sensitive |
| GTGACTGGACCGTGGCTGCGGCAT   | 0  | 15 | RDR2-sensitive |
| GTGACTGTCCAACGAGCGTGGGTG   | 0  | 9  | RDR2-sensitive |
| GTGACTGTGAGAGCGGGATGGGAA   | 3  | 69 | RDR2-sensitive |
| GTGACTGTGAGAGCGGGATTGGAA   | 2  | 51 | RDR2-sensitive |
| GTGACTGTGGCAGACTGGCTTGGG   | 8  | 95 | RDR2-sensitive |
| GTGACTGTGTCCAGCATACTGTGA   | 0  | 10 | RDR2-sensitive |
| GTGACTGTTGCAGACTGGCTTGGG   | 0  | 13 | RDR2-sensitive |
| GTGACTGTTGCTTCAGCAGAACGA   | 0  | 20 | RDR2-sensitive |
| GTGACTGTTTCGGCAACACGGAA    | 0  | 11 | RDR2-sensitive |
| GTGACTTAGGGTCGGACGGTCCAT   | 0  | 10 | RDR2-sensitive |
| GTGACTTGGACGTAGGAGTGGCTC   | 0  | 24 | RDR2-sensitive |
| GTGAGAAAAGGGCTGTAGAGGGCT   | 0  | 23 | RDR2-sensitive |
| GTGAGAACGACCGCGACTGAGGCA   | 0  | 12 | RDR2-sensitive |
| GTGAGACAGACGGTAGGCCAGAAA   | 0  | 10 | RDR2-sensitive |
| GTGAGACCAGGAGAGCAGGACCGC   | 0  | 9  | RDR2-sensitive |
| GTGAGACTGAGACCCACTTGTCCG   | 0  | 24 | RDR2-sensitive |
| GTGAGACTGGTGGATGTGAGGGGC   | 0  | 21 | RDR2-sensitive |
| GTGAGAGCGGGATTGGAACGGAGC   | 0  | 14 | RDR2-sensitive |
| GTGAGAGGTCTAGGTCGTCTCTC    | 3  | 27 | RDR2-sensitive |
| GTGAGAGTGTAGAAGGGACGAGAG   | 0  | 15 | RDR2-sensitive |
| GTGAGCAACGGGAACGAGAATCGG   | 0  | 9  | RDR2-sensitive |
| GTGAGCAGGTACCTTCGGACTCAA   | 1  | 16 | RDR2-sensitive |
| GTGAGCAGGTATCTTCGGACTCAA   | 0  | 33 | RDR2-sensitive |
| GTGAGCCAGGACCGCTGAAGGCTG   | 0  | 9  | RDR2-sensitive |
| GTGAGCCAGGCTGTGGAGAAACGG   | 0  | 12 | RDR2-sensitive |
| GTGAGCCGCTGAAGACTGGATGTA   | 0  | 17 | RDR2-sensitive |
| GTGAGCCTGGACGGGTAGAAACGC   | 0  | 25 | RDR2-sensitive |
| GTGAGCCTGGCTCCACAGATGCGC   | 0  | 9  | RDR2-sensitive |
| GTGAGCGGGGCTGAGGTATGGTAC   | 1  | 16 | RDR2-sensitive |
| GTGAGCTAGGACCGCTGAAGACTA   | 0  | 15 | RDR2-sensitive |
| GTGAGCTGAAGCCGGGTGAGCCAC   | 0  | 9  | RDR2-sensitive |
| GTGAGCTTCGCGTAGACTGGGCTA   | 0  | 10 | RDR2-sensitive |
| GTGAGGACACACTTGTGAGGACGA   | 0  | 20 | RDR2-sensitive |
| GTGAGGAGTGAGAAGATGATGGAC   | 0  | 17 | RDR2-sensitive |
| GTGAGGATTGTGACGCATCAGTAT   | 0  | 25 | RDR2-sensitive |
| GTGAGGCGAGGACTCTCGGACGGA   | 0  | 37 | RDR2-sensitive |
| GTGAGGCGGAACGACGGACCAGAT   | 0  | 16 | RDR2-sensitive |
| GTGAGGGCTGTGTGGAGACGACAT   | 0  | 10 | RDR2-sensitive |
| GTGAGGGGCTGCAAACGGCCTGGT   | 0  | 12 | RDR2-sensitive |

|                           |    |    |                |
|---------------------------|----|----|----------------|
| GTGAGTAGAGGACGTTCTGATCCT  | 0  | 15 | RDR2-sensitive |
| GTGAGTCAAGACGGGATGGGACAG  | 0  | 44 | RDR2-sensitive |
| GTGAGTCCGATAGCATACTGGCGA  | 1  | 24 | RDR2-sensitive |
| GTGAGTCTGTTAGTCGTGCCGGGC  | 0  | 10 | RDR2-sensitive |
| GTGAGTTCTGATCCTGGCACGTAC  | 0  | 16 | RDR2-sensitive |
| GTGAGTTGCAGTAGCCGGGAACAG  | 0  | 9  | RDR2-sensitive |
| GTGAGTTGGTATGTTTTATGGTTG  | 34 | 2  | RDR2-resistant |
| GTGAGTTTCTGATCCTGGCACGTA  | 1  | 16 | RDR2-sensitive |
| GTGATCGGTCTGAACTGACAGCAG  | 0  | 12 | RDR2-sensitive |
| GTGATCTGGACGCAGGAGCGACGC  | 0  | 36 | RDR2-sensitive |
| GTGATGATCTGGACACGACGACGT  | 0  | 10 | RDR2-sensitive |
| GTGATGGCTGTAAGCGCGCGGAAT  | 0  | 12 | RDR2-sensitive |
| GTGATGGGAACATGTGGACGTCGA  | 0  | 10 | RDR2-sensitive |
| GTGATGGGACCAGTGGAAAGCGGAC | 18 | 0  | RDR2-resistant |
| GTGATGGGCTGTAAAAGAGGGTGT  | 0  | 18 | RDR2-sensitive |
| GTGATGTGACTGTGGATTGGGCTG  | 0  | 11 | RDR2-sensitive |
| GTGATGTGGACCAGGCGATAGCAA  | 0  | 11 | RDR2-sensitive |
| GTGATGTGGTTGTGTGGAGGAGGT  | 23 | 2  | RDR2-resistant |
| GTGATTATAGCTCTGAGATGGTAT  | 0  | 12 | RDR2-sensitive |
| GTGATTCAGGACAAAGGAATGCGG  | 0  | 13 | RDR2-sensitive |
| GTGATTCTCTAGATGTAGCGGCTC  | 0  | 19 | RDR2-sensitive |
| GTGATTGGTTGCCGATAAGCAGA   | 0  | 12 | RDR2-sensitive |
| GTGATTGTATTCAAAGGAGCTGCA  | 14 | 0  | RDR2-resistant |
| GTGCAAACGGGCAGTGGAAAGATGA | 0  | 13 | RDR2-sensitive |
| GTGCAACGATTGACTGGATGGCGT  | 0  | 10 | RDR2-sensitive |
| GTGCAAGTGTAGCTCTGCGGACGG  | 2  | 52 | RDR2-sensitive |
| GTGCAATTGTAGCTCTGCGGACGG  | 0  | 9  | RDR2-sensitive |
| GTGCACAGGACTCACGTAGGAGGA  | 0  | 16 | RDR2-sensitive |
| GTGCACATGTAGATCGGTATCCTC  | 0  | 21 | RDR2-sensitive |
| GTGCACCAAACGATTGTGGACGTC  | 0  | 11 | RDR2-sensitive |
| GTGCACCAGGGGACTCCAAGCTGA  | 0  | 11 | RDR2-sensitive |
| GTGCACCGGGTCTGGGCTGGTACGG | 2  | 82 | RDR2-sensitive |
| GTGCACTGGAGCAACAGAGACGAG  | 0  | 43 | RDR2-sensitive |
| GTGCACTGGAGCAGCAGGGGCGAG  | 0  | 18 | RDR2-sensitive |
| GTGCACTGTAGCGACGGTGGTTCGA | 0  | 31 | RDR2-sensitive |
| GTGCACTGTGAACGCCTACGGTAC  | 0  | 61 | RDR2-sensitive |
| GTGCAGATGGGAATGGCAGAACAC  | 0  | 10 | RDR2-sensitive |
| GTGCAGATTCCTGGGACTTGACGG  | 0  | 12 | RDR2-sensitive |
| GTGCAGCGATCTCAAGGACCCGGC  | 0  | 9  | RDR2-sensitive |
| GTGCAGCGCAGTAGAAGATGATGA  | 0  | 9  | RDR2-sensitive |
| GTGCAGCGGCTTGGACTTGACGG   | 0  | 21 | RDR2-sensitive |
| GTGCAGGAGCTGTGCCGAGGACGA  | 0  | 12 | RDR2-sensitive |
| GTGCAGGGCCATGGACGAAGACGC  | 0  | 14 | RDR2-sensitive |
| GTGCAGGTCCGGACGTGGGCGGCG  | 1  | 13 | RDR2-sensitive |
| GTGCAGTCCTTGATCGGTCGTCGG  | 0  | 9  | RDR2-sensitive |
| GTGCAGTGA CTGTAGATGGGCTAA | 0  | 15 | RDR2-sensitive |
| GTGCATCCATGCGATTGTGGGACA  | 0  | 26 | RDR2-sensitive |
| GTGCATCGAGGTATCGCGACGTT   | 0  | 9  | RDR2-sensitive |
| GTGCATCGAGGTGTCGCGGACGGT  | 0  | 10 | RDR2-sensitive |

|                           |    |    |                |
|---------------------------|----|----|----------------|
| GTGCATCGAGGTGTCGTAGACGGT  | 0  | 17 | RDR2-sensitive |
| GTGCATGGATTCTAGCTTCGACGG  | 0  | 9  | RDR2-sensitive |
| GTGCATTGTTGGACCGTGCCGGC   | 0  | 32 | RDR2-sensitive |
| GTGCATTGGGTACTGTAGGACGGC  | 2  | 42 | RDR2-sensitive |
| GTGCCAACAGTCGGCTCTCGGCAA  | 2  | 26 | RDR2-sensitive |
| GTGCCAACCGTCGGCTCTCGGCAA  | 0  | 19 | RDR2-sensitive |
| GTGCCAACGCAGCACGTACCTCGG  | 1  | 42 | RDR2-sensitive |
| GTGCCACGCGGACTGCCACGTCAC  | 1  | 53 | RDR2-sensitive |
| GTGCCACGCGGGCTGCCACGTCAT  | 3  | 29 | RDR2-sensitive |
| GTGCCAGCCGTCGGCTCTCGGCAA  | 0  | 13 | RDR2-sensitive |
| GTGCCAGCGCAGCACGTACCTCGG  | 0  | 23 | RDR2-sensitive |
| GTGCCAGGTCGCGGACCGTCCGGC  | 1  | 38 | RDR2-sensitive |
| GTGCCCCAGTTGGACACTCGGCAA  | 0  | 12 | RDR2-sensitive |
| GTGCCGATGGACTGGAAACGGTAA  | 0  | 9  | RDR2-sensitive |
| GTGCCGATGGGAACATGGACGGCG  | 3  | 24 | RDR2-sensitive |
| GTGCCGCGGTGCTGTTTCACGCAT  | 1  | 17 | RDR2-sensitive |
| GTGCCGCTGTAGATTAGACGGTGA  | 0  | 25 | RDR2-sensitive |
| GTGCCGGCCTGGCTCGGTCATCGG  | 0  | 11 | RDR2-sensitive |
| GTGCCGGGCCTAGGAAGCGTGCTT  | 0  | 11 | RDR2-sensitive |
| GTGCCGTGGGCCGATGACTGGGCA  | 2  | 57 | RDR2-sensitive |
| GTGCCTATGGACTAGAATGAAGGC  | 0  | 16 | RDR2-sensitive |
| GTGCCTGGACCACGACTGCGACAT  | 0  | 18 | RDR2-sensitive |
| GTGCCTGGTCTACACTATCGTCTT  | 0  | 12 | RDR2-sensitive |
| GTGCCTGTTAGCCAGAATCGTCGA  | 0  | 14 | RDR2-sensitive |
| GTGCCTTCGTTGGACTGGTGCCAG  | 0  | 25 | RDR2-sensitive |
| GTGCCTTCGTTGGGCCGTCGCCGGC | 8  | 46 | RDR2-sensitive |
| GTGCCTTCGTTGGGCTGTGGCGGC  | 0  | 15 | RDR2-sensitive |
| GTGCCTTCTTTGGACTGTGCCGGC  | 0  | 19 | RDR2-sensitive |
| GTGCCTTGAGCCCTGTAGAAGCAT  | 0  | 13 | RDR2-sensitive |
| GTGCCTTGTCGTGCTGTTTATCGG  | 31 | 5  | RDR2-resistant |
| GTGCCTTTGTGCCAGTCGTCGAT   | 0  | 12 | RDR2-sensitive |
| GTGCGACTCCGGAGCAACGGCTAT  | 1  | 12 | RDR2-sensitive |
| GTGCGAGACCAACAGACACTCGGC  | 0  | 12 | RDR2-sensitive |
| GTGCGAGATCTCGGGTGTTGCAT   | 0  | 14 | RDR2-sensitive |
| GTGCGATTGTCTAGATAACATGGC  | 0  | 11 | RDR2-sensitive |
| GTGCGCCGGGCTGAGCAGGCAGCA  | 0  | 22 | RDR2-sensitive |
| GTGCGCGGATTACTGTATGGGCAG  | 0  | 14 | RDR2-sensitive |
| GTGCGCTGTAGGAGGCACCGCTGC  | 0  | 9  | RDR2-sensitive |
| GTGCGGAAGGAATCGAGTGCTGGC  | 0  | 9  | RDR2-sensitive |
| GTGCGGAAGGCCAGGTAGAGCGGT  | 0  | 33 | RDR2-sensitive |
| GTGCGGACTATCTGTGCCACCGGC  | 0  | 36 | RDR2-sensitive |
| GTGCGGAGAGGCAGATGAATTCGG  | 0  | 26 | RDR2-sensitive |
| GTGCGGAGGATTGCGGTATAGAGT  | 0  | 14 | RDR2-sensitive |
| GTGCGGATGCAAGGCGGCTCAGTC  | 0  | 9  | RDR2-sensitive |
| GTGCGGCATTATGACGAGAGCGGT  | 0  | 14 | RDR2-sensitive |
| GTGCGGCCTGTCCAAGCAGAAGT   | 0  | 14 | RDR2-sensitive |
| GTGCGGCGAACTGTACAACGGCAA  | 0  | 9  | RDR2-sensitive |
| GTGCGGCTGGATGGCATAGGCAAT  | 0  | 10 | RDR2-sensitive |
| GTGCGGGAGGGACGAAGACGGCCT  | 0  | 14 | RDR2-sensitive |

|                           |    |     |                |
|---------------------------|----|-----|----------------|
| GTGCGGGAGGGACGAAGACGTGCG  | 0  | 9   | RDR2-sensitive |
| GTGCGGGCTTACTCGGCGTGTCGA  | 0  | 13  | RDR2-sensitive |
| GTGCGGGTAACCAATCGGACGGTA  | 0  | 12  | RDR2-sensitive |
| GTGCGGGTGGTACGATATCGGTAT  | 0  | 10  | RDR2-sensitive |
| GTGCGGTGTAGTAGCTACGTGGGC  | 0  | 12  | RDR2-sensitive |
| GTGCGTACGGCAGCCTCGGACGAT  | 0  | 9   | RDR2-sensitive |
| GTGCGTAGACTGTTGATAGGGCAC  | 1  | 27  | RDR2-sensitive |
| GTGCGTAGCTGTAGTGTGGGTCTA  | 0  | 9   | RDR2-sensitive |
| GTGCGTAGGCTCGAACTCCGACGG  | 2  | 83  | RDR2-sensitive |
| GTGCGTATCGAAGGCGGCTCGCTC  | 0  | 9   | RDR2-sensitive |
| GTGCGTCCGCGCGATTGTGGGGCA  | 0  | 20  | RDR2-sensitive |
| GTGCGTCCGTGCGATTGTGGGGCA  | 0  | 10  | RDR2-sensitive |
| GTGCGTGACTGTGTGGCATCTCAA  | 0  | 58  | RDR2-sensitive |
| GTGCGTGACAGATGGATGGTAGAAT | 0  | 10  | RDR2-sensitive |
| GTGCGTGGCTAGGGATTGAGGGCA  | 0  | 11  | RDR2-sensitive |
| GTGCGTTATCGAGCTCGTCGTCGT  | 0  | 10  | RDR2-sensitive |
| GTGCGTTCCTGTAGAACCAGGCTG  | 0  | 24  | RDR2-sensitive |
| GTGCGTTGCGACGGCTACAACAA   | 2  | 72  | RDR2-sensitive |
| GTGCGTTGCGACGGCTTACAACAA  | 5  | 374 | RDR2-sensitive |
| GTGCGTTGCGACGGCTTACAACAG  | 1  | 12  | RDR2-sensitive |
| GTGCGTTGCGACGGCTTACAACAT  | 0  | 17  | RDR2-sensitive |
| GTGCGTTGCGACGGTTTACAACAA  | 0  | 26  | RDR2-sensitive |
| GTGCGTTGCTCGGATCTAGACGGT  | 1  | 13  | RDR2-sensitive |
| GTGCGTTTTGGAGTAGGATGGTGT  | 1  | 13  | RDR2-sensitive |
| GTGCTACTCTGAGCTGCAGCGGGC  | 0  | 16  | RDR2-sensitive |
| GTGCTAGACTCTACGCGTGATCGA  | 0  | 17  | RDR2-sensitive |
| GTGCTAGAGCCCTGTGTACGCGGT  | 2  | 15  | RDR2-sensitive |
| GTGCTAGCACAACCCGGTCGTCGT  | 0  | 17  | RDR2-sensitive |
| GTGCTAGCTGTAGAGCACTCGGCA  | 2  | 49  | RDR2-sensitive |
| GTGCTATAGAACAGAAGGGCGCAG  | 0  | 10  | RDR2-sensitive |
| GTGCTCAAATATGCGGGTCGTCGT  | 0  | 10  | RDR2-sensitive |
| GTGCTCACGTGCGGGTGGAGACGC  | 0  | 12  | RDR2-sensitive |
| GTGCTCGGACCGGACTGGCACGGA  | 1  | 65  | RDR2-sensitive |
| GTGCTCGGATCAGGCTACAAATAT  | 0  | 13  | RDR2-sensitive |
| GTGCTCGGTCTGAACTGATAGCAG  | 0  | 12  | RDR2-sensitive |
| GTGCTCTAACTTTCGGTCTGTCGT  | 0  | 13  | RDR2-sensitive |
| GTGCTCTGCGCAAGGGCGGACT    | 1  | 19  | RDR2-sensitive |
| GTGCTCTGGTCAAGCGCGGACG    | 1  | 14  | RDR2-sensitive |
| GTGCTCTGGTCAGGCGCGGACG    | 12 | 91  | RDR2-sensitive |
| GTGCTCTGTGACGGCGCGGACGG   | 0  | 10  | RDR2-sensitive |
| GTGCTCTGTGGAAGCGAGGACG    | 0  | 10  | RDR2-sensitive |
| GTGCTCTGAATGTCAAAGTGAAGA  | 56 | 2   | RDR2-resistant |
| GTGCTCTGACCGGCGCGCACGCTT  | 0  | 12  | RDR2-sensitive |
| GTGCTCTGACGACGCCTCGGCATA  | 0  | 12  | RDR2-sensitive |
| GTGCTCTGGTTGGCGGCTGACGG   | 0  | 12  | RDR2-sensitive |
| GTGCTCTGGTTGGCGGCTCGACGG  | 2  | 32  | RDR2-sensitive |
| GTGCTCTGTGGAGGCGTGGACGGT  | 1  | 17  | RDR2-sensitive |
| GTGCTGAATCCTTTGCAGACGACT  | 15 | 0   | RDR2-resistant |
| GTGCTGACTGCGGGCTACAGAAGA  | 0  | 9   | RDR2-sensitive |

|                           |     |    |                |
|---------------------------|-----|----|----------------|
| GTGCTGACTGTGCCGGACGAGCAC  | 2   | 25 | RDR2-sensitive |
| GTGCTGATGGACCAGGACCGGTAA  | 0   | 9  | RDR2-sensitive |
| GTGCTGATTCTCTTGCCATAGACG  | 16  | 0  | RDR2-resistant |
| GTGCTGCAAGCTTTATGGTTTCGAT | 14  | 0  | RDR2-resistant |
| GTGCTGCATCTTGGACGTACACGG  | 0   | 14 | RDR2-sensitive |
| GTGCTGCGTTGGCACAACTCGGAC  | 0   | 14 | RDR2-sensitive |
| GTGCTGGACTGGCCTGATTGGCAC  | 0   | 19 | RDR2-sensitive |
| GTGCTGGACTGTCACTGACGCGCT  | 0   | 11 | RDR2-sensitive |
| GTGCTGGATCTGAATGGCTACTGT  | 0   | 11 | RDR2-sensitive |
| GTGCTGGGACTAAATTTTTGGCAT  | 0   | 14 | RDR2-sensitive |
| GTGCTGGGCTCTTTGGACCGGTAG  | 0   | 9  | RDR2-sensitive |
| GTGCTGGTTCGGCAGACACTCGGCA | 0   | 9  | RDR2-sensitive |
| GTGCTGTAAGATATGATTGGTGTG  | 202 | 21 | RDR2-resistant |
| GTGCTGTAGAAGCGTTGTGGCTGC  | 0   | 9  | RDR2-sensitive |
| GTGCTGTAGCCACCAGTTGAAGGG  | 0   | 14 | RDR2-sensitive |
| GTGCTGTAGTAGTGGGCACGGCAC  | 0   | 12 | RDR2-sensitive |
| GTGCTGTCCGTGCGCGTCGTCGTT  | 0   | 9  | RDR2-sensitive |
| GTGCTGTTCGAGCAGGAGCTGATGC | 0   | 20 | RDR2-sensitive |
| GTGCTGTGGACGCGACGCAAAGAC  | 0   | 9  | RDR2-sensitive |
| GTGCTGTGGGCCGATGACTAGGCA  | 2   | 30 | RDR2-sensitive |
| GTGCTGTTCCGGAAGACGTGGGGCA | 2   | 22 | RDR2-sensitive |
| GTGCTGTTGGAAAGATGTAGCGTA  | 1   | 84 | RDR2-sensitive |
| GTGCTGTTTTCTGTCAGAACGGT   | 1   | 14 | RDR2-sensitive |
| GTGCTTAAGTCGTCGTCTCGGCAC  | 0   | 11 | RDR2-sensitive |
| GTGCTTATAGGACTGAGTCGGCTC  | 0   | 23 | RDR2-sensitive |
| GTGCTTCGACTGGTGGCCCGACGG  | 0   | 39 | RDR2-sensitive |
| GTGCTTCGGCTGAGGGCCCGACGG  | 0   | 10 | RDR2-sensitive |
| GTGCTTCGGGCCTCAGTTAGTCGG  | 0   | 14 | RDR2-sensitive |
| GTGCTTCGGGCCTCGGTTAGTCGG  | 0   | 16 | RDR2-sensitive |
| GTGCTTCGGGCTGGTCCATCAGGC  | 0   | 18 | RDR2-sensitive |
| GTGCTTCGTGCCGGACTAACGGGC  | 0   | 27 | RDR2-sensitive |
| GTGCTTCGTGCCGGGCTAACGGGC  | 1   | 26 | RDR2-sensitive |
| GTGCTTCGTGTCGGGCTAACGGGT  | 0   | 13 | RDR2-sensitive |
| GTGCTTCTTCTAGGGTCAGTCGGC  | 0   | 11 | RDR2-sensitive |
| GTGCTTGAGCCCTGTAGAAGCGTA  | 1   | 22 | RDR2-sensitive |
| GTGCTTGCGGGCTGTCCGACCGGC  | 0   | 15 | RDR2-sensitive |
| GTGCTTGACAGGTAGGCCGGCCC   | 0   | 12 | RDR2-sensitive |
| GTGCTTGACCGGACCAGAATCGT   | 0   | 24 | RDR2-sensitive |
| GTGCTTGACCGGGCCAGAATCGT   | 0   | 12 | RDR2-sensitive |
| GTGCTTGGGCCTAGGATGTGGCAC  | 0   | 13 | RDR2-sensitive |
| GTGCTTGGGCTCCCTGCTGCGCGG  | 0   | 9  | RDR2-sensitive |
| GTGCTTGGGCTGGGGATGTGGCAC  | 0   | 29 | RDR2-sensitive |
| GTGCTTGGGTCTGGGATGTGGCAA  | 0   | 11 | RDR2-sensitive |
| GTGCTTGGTCTGTAGCTTCGGCCT  | 0   | 10 | RDR2-sensitive |
| GTGCTTGTTTCGTTGGTCTGGCATG | 0   | 28 | RDR2-sensitive |
| GTGCTTGTTGGCGATAGACGGACC  | 24  | 2  | RDR2-resistant |
| GTGCTTTCAGGAGTAGGACGGTGT  | 2   | 28 | RDR2-sensitive |
| GTGCTTTGGCGTGGAACAGACGAG  | 0   | 9  | RDR2-sensitive |
| GTGCTTTGGCGTGGGACAGACGAG  | 8   | 48 | RDR2-sensitive |

|                           |    |     |                |
|---------------------------|----|-----|----------------|
| GTGCTTTGGGACGGCCTGTTAGGC  | 0  | 9   | RDR2-sensitive |
| GTGCTTTTAGGAGTAGGACGGTGT  | 4  | 18  | RDR2-sensitive |
| GTGCTTTTATCGGACACTCGGCAC  | 3  | 69  | RDR2-sensitive |
| GTGCTTTTTATCGGACACTCGGCA  | 0  | 15  | RDR2-sensitive |
| GTGCTTTTTATCGGGCACTCGGCA  | 0  | 11  | RDR2-sensitive |
| GTGCTTTTTGCAAATCGTTGGCA   | 0  | 40  | RDR2-sensitive |
| GTGCTTTTTGGAGTAGGACGGTGT  | 4  | 32  | RDR2-sensitive |
| GTGCTTTTTGTCGGGCACTCGGCA  | 11 | 102 | RDR2-sensitive |
| GTGCTTTTTGTTGGACACTCGGCA  | 0  | 17  | RDR2-sensitive |
| GTGCTTTTTTATCGGACACTCGGC  | 0  | 15  | RDR2-sensitive |
| GTGCTTTTTTCGGACACTCGGCAA  | 5  | 32  | RDR2-sensitive |
| GTGCTTTTTTGTCTGGCACTCGGC  | 0  | 15  | RDR2-sensitive |
| GTGCTTTTTTTCGGACACTCGGCA  | 2  | 34  | RDR2-sensitive |
| GTGGAAAAGCAGCTGTAGGCTAT   | 0  | 16  | RDR2-sensitive |
| GTGGAAAAGCTGCTGTAGGCTGT   | 1  | 31  | RDR2-sensitive |
| GTGGAAAAGTTGCTGTGGGCTGT   | 0  | 14  | RDR2-sensitive |
| GTGGAAAAGACAGACTGTCTGGCTC | 0  | 12  | RDR2-sensitive |
| GTGGAAAGGCAGAACCGTGCACCA  | 0  | 11  | RDR2-sensitive |
| GTGGAAATGGGGAGCGCAGGGACA  | 2  | 17  | RDR2-sensitive |
| GTGGAAATGGGGAGTGCAGGGACA  | 0  | 9   | RDR2-sensitive |
| GTGGAACATAGCGAGGACGAACGT  | 1  | 86  | RDR2-sensitive |
| GTGGAACCAGACCAGAACGAGCAT  | 0  | 31  | RDR2-sensitive |
| GTGGAACCAGTGGCACACAAGTAA  | 0  | 10  | RDR2-sensitive |
| GTGGAACCTGAGGCTCAAGAGCAT  | 0  | 15  | RDR2-sensitive |
| GTGGAACTCTAGCGAGGGGCGGAG  | 0  | 23  | RDR2-sensitive |
| GTGGAACTGCAGTGGAGCGGACCA  | 0  | 13  | RDR2-sensitive |
| GTGGAACTGCATGACGATGGGCAG  | 0  | 13  | RDR2-sensitive |
| GTGGAAGACATCATGCACTCCGGA  | 0  | 12  | RDR2-sensitive |
| GTGGAAGACTGGAATGTGCGGCGA  | 0  | 15  | RDR2-sensitive |
| GTGGAAGAGGGGAGCAAAGACCAA  | 0  | 9   | RDR2-sensitive |
| GTGGAAGCGTTGCACTGTATGCGG  | 0  | 12  | RDR2-sensitive |
| GTGGAAGGCCAGGTAGAGCGGTTA  | 0  | 28  | RDR2-sensitive |
| GTGGAAGGCTAGGCATTCTGCTCA  | 0  | 11  | RDR2-sensitive |
| GTGGAAGGTGTAGGCTTACGGTAC  | 0  | 9   | RDR2-sensitive |
| GTGGAATGCGGATACTACCCAGAT  | 0  | 10  | RDR2-sensitive |
| GTGGAATGGACGAGCCGAGCCGAG  | 1  | 110 | RDR2-sensitive |
| GTGGAATGGACGAGCCGAGCTGAG  | 0  | 10  | RDR2-sensitive |
| GTGGAATGTTGTGGAGCAGGCGTC  | 0  | 14  | RDR2-sensitive |
| GTGGAATTGTAGGTGACACGGTTT  | 0  | 40  | RDR2-sensitive |
| GTGGAATTTGATGAGACTAATGGC  | 15 | 0   | RDR2-resistant |
| GTGGACACAACATGGATCGACGAC  | 0  | 9   | RDR2-sensitive |
| GTGGACACAACGTGGATTGACGAC  | 0  | 12  | RDR2-sensitive |
| GTGGACACCACGAGAGAGCTCGGT  | 0  | 33  | RDR2-sensitive |
| GTGGACACCTGATGCTATCACGGC  | 0  | 46  | RDR2-sensitive |
| GTGGACACGGACAGCAAGACCCTC  | 0  | 11  | RDR2-sensitive |
| GTGGACAGACGGTAAGCAGGGACA  | 0  | 27  | RDR2-sensitive |
| GTGGACAGAGCATGGGCATGGATT  | 0  | 9   | RDR2-sensitive |
| GTGGACAGAGTAGGAGAGAGCATG  | 0  | 45  | RDR2-sensitive |
| GTGGACAGATGAGTTGATCGGCCT  | 0  | 14  | RDR2-sensitive |



|                           |    |    |                |
|---------------------------|----|----|----------------|
| GTGGACAGCGTTTACGACTGCATA  | 0  | 23 | RDR2-sensitive |
| GTGGACAGGAACCGCCGCACGGCT  | 3  | 26 | RDR2-sensitive |
| GTGGACAGTAGGGTTACGCGTGAG  | 0  | 22 | RDR2-sensitive |
| GTGGACAGTCGGGACGCATTGGAC  | 0  | 9  | RDR2-sensitive |
| GTGGACATCGACGGTGGACATCGA  | 0  | 9  | RDR2-sensitive |
| GTGGACATGAACTAGGCACGGTG   | 0  | 18 | RDR2-sensitive |
| GTGGACATGGATACGGGTTTGA    | 0  | 20 | RDR2-sensitive |
| GTGGACCAATCAGATCGCGACACG  | 2  | 81 | RDR2-sensitive |
| GTGGACCAGAAGGAGTAAGAGCAT  | 0  | 9  | RDR2-sensitive |
| GTGGACCATCCGGACAAACGCAGA  | 0  | 15 | RDR2-sensitive |
| GTGGACCATCTGAGACCTTGCGGT  | 0  | 10 | RDR2-sensitive |
| GTGGACCATCTGGACATACGCAGA  | 0  | 20 | RDR2-sensitive |
| GTGGACCATCTGGCATAGGACCGC  | 2  | 53 | RDR2-sensitive |
| GTGGACCCACAGAACAGTGCCGGA  | 0  | 11 | RDR2-sensitive |
| GTGGACCCACAGCACAGTGTCGTA  | 0  | 15 | RDR2-sensitive |
| GTGGACCCAGAGCAGAATGAATGC  | 1  | 16 | RDR2-sensitive |
| GTGGACCCGACAGTGCAAGAGACAA | 0  | 9  | RDR2-sensitive |
| GTGGACCGTCCAAACCTGCGGCGC  | 0  | 10 | RDR2-sensitive |
| GTGGACCGTCCAGACGTACGCATA  | 0  | 27 | RDR2-sensitive |
| GTGGACCGTCTGAACGTACGAAGA  | 0  | 11 | RDR2-sensitive |
| GTGGACCGTCTGACCTAGAGGTAC  | 0  | 17 | RDR2-sensitive |
| GTGGACCGTCTGGCTACTAGGCAT  | 0  | 16 | RDR2-sensitive |
| GTGGACCGTTCGACCACGAGACGC  | 2  | 35 | RDR2-sensitive |
| GTGGACCTGCATACATATATCTGA  | 19 | 1  | RDR2-resistant |
| GTGGACCTTGATGAAGAGCGTCTA  | 0  | 82 | RDR2-sensitive |
| GTGGACGAAGAGCACGGATAGCGC  | 0  | 9  | RDR2-sensitive |
| GTGGACGACAGCGCGGCAGGTAGC  | 1  | 16 | RDR2-sensitive |
| GTGGACGACGGAACGACGGGTTCA  | 0  | 10 | RDR2-sensitive |
| GTGGACGAGGACGTGCGCAATGCG  | 0  | 13 | RDR2-sensitive |
| GTGGACGCACGTGGAAGCCGGATT  | 0  | 28 | RDR2-sensitive |
| GTGGACGCATGTAGGAGCGGGAAT  | 0  | 61 | RDR2-sensitive |
| GTGGACGCCACAGTAGAGACATA   | 0  | 11 | RDR2-sensitive |
| GTGGACGCCTACCAGATCTCGGTC  | 0  | 14 | RDR2-sensitive |
| GTGGACGCGTAGTAGCATGTGTGC  | 0  | 9  | RDR2-sensitive |
| GTGGACGCTGACGCTACAGACTTA  | 0  | 10 | RDR2-sensitive |
| GTGGACGCTGACGGTACTATCTTA  | 0  | 16 | RDR2-sensitive |
| GTGGACGCTGAGGAGGTGGCTCAT  | 47 | 0  | RDR2-resistant |
| GTGGACGGCGACAGAGTGGACGGA  | 1  | 32 | RDR2-sensitive |
| GTGGACGGTCCGGTCTTAGGCATG  | 0  | 9  | RDR2-sensitive |
| GTGGACGTGCATGTGGACGTGCAG  | 0  | 10 | RDR2-sensitive |
| GTGGACTAGCTCGGCATGGCTCAT  | 0  | 9  | RDR2-sensitive |
| GTGGACTATAGAGGGCTTCACCGA  | 0  | 33 | RDR2-sensitive |
| GTGGACTATGTAGAGGCGTAGTTG  | 0  | 20 | RDR2-sensitive |
| GTGGACTATGTGGAAGCGCAGCTG  | 0  | 15 | RDR2-sensitive |
| GTGGACTCATCTGGCACGACACGG  | 2  | 16 | RDR2-sensitive |
| GTGGACTCCGTAGCAAAGCACGGG  | 0  | 12 | RDR2-sensitive |
| GTGGACTCCTTAACGAGGACGTAA  | 0  | 10 | RDR2-sensitive |
| GTGGACTCTCTCGGCTGAGCCGCGC | 1  | 16 | RDR2-sensitive |
| GTGGACTGACACGAAGGCCGACGT  | 0  | 19 | RDR2-sensitive |

|                           |    |    |                |
|---------------------------|----|----|----------------|
| GTGGACTGACTGAGGACGAGGCAC  | 0  | 11 | RDR2-sensitive |
| GTGGACTGACTGAGGATGAGGCAC  | 0  | 10 | RDR2-sensitive |
| GTGGACTGAGCAGTGAAACGTCGA  | 1  | 13 | RDR2-sensitive |
| GTGGACTGAGCAGTGAAGCGTCGA  | 0  | 9  | RDR2-sensitive |
| GTGGACTGGCTGGTCGATGGCGTC  | 0  | 10 | RDR2-sensitive |
| GTGGACTGGTGTATGTCACGGCCT  | 0  | 11 | RDR2-sensitive |
| GTGGACTGTCCGGCCAAGAGACAC  | 0  | 24 | RDR2-sensitive |
| GTGGACTGTCTATGCATTTCTAC   | 0  | 21 | RDR2-sensitive |
| GTGGACTGTCTGCACCGTGCAGAG  | 3  | 22 | RDR2-sensitive |
| GTGGACTGTGCAGAGGAATGAGAA  | 0  | 9  | RDR2-sensitive |
| GTGGACTTAGACGGCTCGGCCCAA  | 0  | 12 | RDR2-sensitive |
| GTGGACTTAGGGCCCTAGCGACGG  | 0  | 12 | RDR2-sensitive |
| GTGGACTTCAGTGCTGAAGATGTT  | 18 | 0  | RDR2-resistant |
| GTGGACTTGTCGGCGTACTGCTAT  | 0  | 22 | RDR2-sensitive |
| GTGGACTTGTCGGCGTACTGCTGT  | 0  | 23 | RDR2-sensitive |
| GTGGACTTGTCGGCGTACTGTTGT  | 0  | 23 | RDR2-sensitive |
| GTGGACTTGTCGGCGTGCTGCTGT  | 0  | 21 | RDR2-sensitive |
| GTGGACTTGTCGGCGTGCTGTCGT  | 0  | 16 | RDR2-sensitive |
| GTGGACTTGTCGAAACAGGCGTGC  | 0  | 13 | RDR2-sensitive |
| GTGGAGAACGGACAAAGGACGGAC  | 0  | 19 | RDR2-sensitive |
| GTGGAGAACTTGGACGGTGATCAC  | 1  | 20 | RDR2-sensitive |
| GTGGAGACGAGAGCTGACGTGGCA  | 0  | 12 | RDR2-sensitive |
| GTGGAGACTTGGAGACGTGCGCTA  | 2  | 22 | RDR2-sensitive |
| GTGGAGATCGCATTCCGGTGAGCAT | 0  | 11 | RDR2-sensitive |
| GTGGAGATGGCGAACGACGAGCAA  | 0  | 9  | RDR2-sensitive |
| GTGGAGCAACTGCGAGAAGAACTT  | 0  | 12 | RDR2-sensitive |
| GTGGAGCAAGGAAGCGAACGCAAG  | 0  | 16 | RDR2-sensitive |
| GTGGAGCACAGGGACGATGGTTCGA | 1  | 14 | RDR2-sensitive |
| GTGGAGCATGTTGGTGGCTATGAC  | 0  | 19 | RDR2-sensitive |
| GTGGAGCCCTCTGGCAGACCGCGC  | 0  | 11 | RDR2-sensitive |
| GTGGAGCGCAGCGTGGATAATGAC  | 83 | 4  | RDR2-resistant |
| GTGGAGCGGTAGAATGGACGGTGC  | 0  | 21 | RDR2-sensitive |
| GTGGAGCGGTGGCACAGTTGGACG  | 0  | 12 | RDR2-sensitive |
| GTGGAGCTAGAGCTGTAAGACTTT  | 0  | 17 | RDR2-sensitive |
| GTGGAGCTCGAAGGTGGATCTGAG  | 0  | 13 | RDR2-sensitive |
| GTGGAGCTCTTCGGATCTGGCATA  | 45 | 8  | RDR2-resistant |
| GTGGAGGACTCTAACTGCAGGCGT  | 0  | 14 | RDR2-sensitive |
| GTGGAGGCGAGAGCTGACGTGGCA  | 0  | 32 | RDR2-sensitive |
| GTGGAGGCGTCAGACGTAGGACGG  | 0  | 12 | RDR2-sensitive |
| GTGGAGGGCCTTGTAGAGGACGCT  | 0  | 10 | RDR2-sensitive |
| GTGGAGGGTGTAGGCTTACGGTAC  | 0  | 55 | RDR2-sensitive |
| GTGGAGTACGGTATTACGCTCTGT  | 0  | 10 | RDR2-sensitive |
| GTGGAGTAGGGCTTGCAGTCAGAC  | 0  | 14 | RDR2-sensitive |
| GTGGAGTCTGACCATGTAGCTGGA  | 0  | 23 | RDR2-sensitive |
| GTGGAGTGTATTGAGGCTTGGCAT  | 0  | 22 | RDR2-sensitive |
| GTGGAGTGTTCGCTGCGAGCGGC   | 0  | 67 | RDR2-sensitive |
| GTGGATAACGTAACCTCCCGTCGGC | 0  | 10 | RDR2-sensitive |
| GTGGATAACTCAGAGGTGCTGCAT  | 1  | 20 | RDR2-sensitive |
| GTGGATACCTCGGAAGTGCTGCAT  | 1  | 49 | RDR2-sensitive |

|                          |    |     |                |
|--------------------------|----|-----|----------------|
| GTGGATACCTCGGAGATGCTGCAT | 2  | 14  | RDR2-sensitive |
| GTGGATAGAGGACGCACAATGAAC | 0  | 26  | RDR2-sensitive |
| GTGGATAGGACAACGGCAGCTGAT | 0  | 10  | RDR2-sensitive |
| GTGGATAGGCTAGAAAGCGACATT | 0  | 35  | RDR2-sensitive |
| GTGGATATCTTGGAGGTGCTGCAT | 0  | 10  | RDR2-sensitive |
| GTGGATATGACTGCGGGCGGATAT | 0  | 16  | RDR2-sensitive |
| GTGGATCATCCCGGCGTGTAAGT  | 0  | 10  | RDR2-sensitive |
| GTGGATCCCGTTGGCTGACAGCAT | 0  | 13  | RDR2-sensitive |
| GTGGATCCGATGACATACTGGCGA | 0  | 61  | RDR2-sensitive |
| GTGGATCCGATGGCATACTGGCGA | 1  | 27  | RDR2-sensitive |
| GTGGATCGATGACTGGACACACGG | 0  | 9   | RDR2-sensitive |
| GTGGATCTAAACGCACAACGACAT | 0  | 23  | RDR2-sensitive |
| GTGGATCTTCGAGCTCCGACGGTG | 0  | 12  | RDR2-sensitive |
| GTGGATGAGGATGGATATAGCTTT | 0  | 9   | RDR2-sensitive |
| GTGGATGATGGACGAGATGTGCCT | 0  | 31  | RDR2-sensitive |
| GTGGATGCTGGGAACTGCGGATGG | 0  | 23  | RDR2-sensitive |
| GTGGATGCTGTAGGGACACCGCTG | 0  | 9   | RDR2-sensitive |
| GTGGATGTAGCAATTAGGGGGCGT | 1  | 15  | RDR2-sensitive |
| GTGGATTCACAGAAGCGAACGGAT | 1  | 12  | RDR2-sensitive |
| GTGGATTCACGGAAGCGAACGAAC | 0  | 13  | RDR2-sensitive |
| GTGGATTCACGGAAGCGAACGGAC | 0  | 18  | RDR2-sensitive |
| GTGGATTCACGGAAGCGAACGGAT | 0  | 44  | RDR2-sensitive |
| GTGGATTCCTGTAGTGAGGCCCAA | 0  | 10  | RDR2-sensitive |
| GTGGATTCGTGATTGGCGATGGGG | 49 | 0   | RDR2-resistant |
| GTGGATTGAGCGGGATTGGATGGG | 5  | 44  | RDR2-sensitive |
| GTGGATTGAGTGGGATTGGATGGG | 4  | 152 | RDR2-sensitive |
| GTGGATTGATTAATTTTGTACGGC | 0  | 11  | RDR2-sensitive |
| GTGGATTGGAGTGTATTGGACGGG | 0  | 12  | RDR2-sensitive |
| GTGGATTGGAGTGTATTGGCGGG  | 0  | 9   | RDR2-sensitive |
| GTGGATTGGGAACACCGAGGACGC | 0  | 9   | RDR2-sensitive |
| GTGGATTGGGTAGGATTGGATGGA | 0  | 12  | RDR2-sensitive |
| GTGGATTGGGTGGGATTGGATGGG | 0  | 36  | RDR2-sensitive |
| GTGGATTGTTACCTCAAAGATGGA | 0  | 10  | RDR2-sensitive |
| GTGGATTTGAACGCGAAGTGCCAC | 0  | 13  | RDR2-sensitive |
| GTGGATTTGTTTCCTCGTAGTTGT | 0  | 20  | RDR2-sensitive |
| GTGGCAAGTTAGGCAGCGAACCAA | 1  | 27  | RDR2-sensitive |
| GTGGCACCGAGGTAGATGACATGT | 0  | 10  | RDR2-sensitive |
| GTGGCACCGGACGATCTGCAGGCA | 0  | 13  | RDR2-sensitive |
| GTGGCACCGTGAAACTGAGACTGC | 0  | 23  | RDR2-sensitive |
| GTGGCACTAGACTCTTACGGCGTG | 0  | 12  | RDR2-sensitive |
| GTGGCACTCGACAAATCGTTCGGC | 0  | 10  | RDR2-sensitive |
| GTGGCACTCGGCAAAGAAGACTCT | 0  | 10  | RDR2-sensitive |
| GTGGCACTCGGCAAAGAATATGGC | 0  | 9   | RDR2-sensitive |
| GTGGCACTCGGCAAAGACTGACGG | 0  | 9   | RDR2-sensitive |
| GTGGCACTGGGCGCGGCTGGACGG | 0  | 9   | RDR2-sensitive |
| GTGGCACTGGTGGAGAGAAGGCAC | 0  | 10  | RDR2-sensitive |
| GTGGCACTGTGACAGCGTGGACGG | 0  | 9   | RDR2-sensitive |
| GTGGCACTGTGACAGCGTGGACGT | 0  | 19  | RDR2-sensitive |
| GTGGCACTGTGGAGAGAAGACCAC | 0  | 20  | RDR2-sensitive |

|                          |     |    |                |
|--------------------------|-----|----|----------------|
| GTGGCACTGTGGAGAGAAGACCGC | 0   | 20 | RDR2-sensitive |
| GTGGCACTGTGGAGAGACGACCGC | 0   | 9  | RDR2-sensitive |
| GTGGCATATGACGACAGTAGACAC | 0   | 10 | RDR2-sensitive |
| GTGGCATTGAGCATGTCGGACGGA | 0   | 13 | RDR2-sensitive |
| GTGGCCAACTGAAGGAGAACGAGC | 0   | 11 | RDR2-sensitive |
| GTGGCCAAGGAGGACTGAGGCGGT | 0   | 13 | RDR2-sensitive |
| GTGGCCAGACTCTGCAGACGCAAG | 0   | 21 | RDR2-sensitive |
| GTGGCCGTAGGATGCACGAGACGC | 0   | 9  | RDR2-sensitive |
| GTGGCCTAGAGTCGGACGATCCAC | 2   | 17 | RDR2-sensitive |
| GTGGCCTAGGACCAGATGATCCGC | 0   | 9  | RDR2-sensitive |
| GTGGCCTCGGGAGGCAGAACCGCA | 0   | 9  | RDR2-sensitive |
| GTGGCCTCTGGCAACGACGGACAT | 0   | 12 | RDR2-sensitive |
| GTGGCCTCTGTACAGCATTGAGCA | 0   | 33 | RDR2-sensitive |
| GTGGCCTGTAGGCCTGTGGGACGG | 0   | 53 | RDR2-sensitive |
| GTGGCCTGTAGTCCAGCACGGTTT | 0   | 9  | RDR2-sensitive |
| GTGGCCTGTCGACCCCAAGACGAC | 0   | 12 | RDR2-sensitive |
| GTGGCCTGTTGGCTCGACCGTCTG | 19  | 0  | RDR2-resistant |
| GTGGCCTTGTGCGGACCGTCTGGC | 0   | 9  | RDR2-sensitive |
| GTGGCGAAAACGACAGATGGGCAT | 0   | 14 | RDR2-sensitive |
| GTGGCGAGTTGTAGAGCACGATGG | 0   | 19 | RDR2-sensitive |
| GTGGCGCGACAGTAGTAGGACGTC | 0   | 12 | RDR2-sensitive |
| GTGGCGCTGAGCTAGCTGACGCGG | 0   | 13 | RDR2-sensitive |
| GTGGCGCTGTAGTGGGATATAGAG | 0   | 10 | RDR2-sensitive |
| GTGGCGTCGAGCTTAGGGACACGG | 0   | 11 | RDR2-sensitive |
| GTGGCGTTGGTCTCCTGGGCACGG | 289 | 60 | RDR2-resistant |
| GTGGCTACAGGAGCTCCCACGGCT | 0   | 9  | RDR2-sensitive |
| GTGGCTAGAATCTGTAGTAGCAGG | 20  | 1  | RDR2-resistant |
| GTGGCTAGGGATTGAGGGCAGGAC | 4   | 30 | RDR2-sensitive |
| GTGGCTACCCGCTTCAGCTCAC   | 0   | 9  | RDR2-sensitive |
| GTGGCTCGACAACGATGACGTGGG | 0   | 10 | RDR2-sensitive |
| GTGGCTCGGACGGTCCGCGATGGC | 1   | 17 | RDR2-sensitive |
| GTGGCTCTGGACCGGATGGTTCGT | 0   | 10 | RDR2-sensitive |
| GTGGCTGACAGTCGTGCAACGCAT | 0   | 15 | RDR2-sensitive |
| GTGGCTGACTGTCGTATGGTGAC  | 0   | 11 | RDR2-sensitive |
| GTGGCTGCAGAGAAGAGGAAACAA | 0   | 11 | RDR2-sensitive |
| GTGGCTGCGGCATGTGGATCGATC | 0   | 9  | RDR2-sensitive |
| GTGGCTGCGTCGAGCTGTGGCATG | 0   | 11 | RDR2-sensitive |
| GTGGCTGCTGTAGCGGGATCGGAT | 0   | 19 | RDR2-sensitive |
| GTGGCTGGGCGGGTAGAAGGGCTT | 0   | 11 | RDR2-sensitive |
| GTGGCTGTACGGACGCGGATGGAG | 0   | 13 | RDR2-sensitive |
| GTGGCTTAGGTACTGTGTACGGAC | 0   | 17 | RDR2-sensitive |
| GTGGCTTGTAGTGGGCTTTTCGCC | 18  | 1  | RDR2-resistant |
| GTGGCTTGTCTGATATCGGAT    | 14  | 0  | RDR2-resistant |
| GTGGGAACTCGACACGCTGTGACG | 0   | 21 | RDR2-sensitive |
| GTGGGAATCTTGATGATGCTGCAT | 430 | 92 | RDR2-resistant |
| GTGGGACAACGACGATGACGCTAC | 0   | 9  | RDR2-sensitive |
| GTGGGACACTGTAGGAGCGGTCCG | 0   | 11 | RDR2-sensitive |
| GTGGGACAGCCAGGACAGGGACGT | 0   | 12 | RDR2-sensitive |
| GTGGGACAGCTAGGACGGGATCGT | 0   | 27 | RDR2-sensitive |

|                           |     |    |                |
|---------------------------|-----|----|----------------|
| GTGGGACAGCTATGACAGAGACGT  | 0   | 13 | RDR2-sensitive |
| GTGGGACAGTCAGAACAGAGACGT  | 0   | 26 | RDR2-sensitive |
| GTGGGACCAGTAGCATAACAAGGAA | 0   | 47 | RDR2-sensitive |
| GTGGGACCAGTGGCATAACAAGGAA | 0   | 18 | RDR2-sensitive |
| GTGGGACCCTAGATAGATGGCAAG  | 0   | 11 | RDR2-sensitive |
| GTGGGACCCTTACGTTGGACAGCA  | 0   | 9  | RDR2-sensitive |
| GTGGGACGCCAGGCATTGACTACC  | 0   | 19 | RDR2-sensitive |
| GTGGGACTAAAGCCGAGGCACTGA  | 1   | 65 | RDR2-sensitive |
| GTGGGACTAAAGCCGGGGCGCTGA  | 1   | 36 | RDR2-sensitive |
| GTGGGACTAGACCGACGAGGACGT  | 0   | 22 | RDR2-sensitive |
| GTGGGACTGATTGCATACTGGCGA  | 0   | 10 | RDR2-sensitive |
| GTGGGACTGTTGATGACGTAGTAA  | 0   | 10 | RDR2-sensitive |
| GTGGGAGAGGCTCTGCACGGACGG  | 2   | 40 | RDR2-sensitive |
| GTGGGAGATGCTCTGCACGGACGG  | 0   | 13 | RDR2-sensitive |
| GTGGGAGTGTGGGACCACCTCGGC  | 0   | 10 | RDR2-sensitive |
| GTGGGATGCTGTTGCTGAGGCTAC  | 0   | 14 | RDR2-sensitive |
| GTGGGATGGTTCCGGATCTGAGGA  | 0   | 21 | RDR2-sensitive |
| GTGGGATTCGGATCAGATACGCAT  | 0   | 11 | RDR2-sensitive |
| GTGGGATTCGGCCTACTGTAACAG  | 1   | 23 | RDR2-sensitive |
| GTGGGATTGGGCTGTGCAGGGTGT  | 17  | 0  | RDR2-resistant |
| GTGGGCAAGCTGAGGATATTGGTG  | 0   | 10 | RDR2-sensitive |
| GTGGGCACTGGACAGTTGATCGGC  | 0   | 11 | RDR2-sensitive |
| GTGGGCATAAGAGGAAGGAGGACG  | 3   | 48 | RDR2-sensitive |
| GTGGGCATCTTAGACGAAGGACGG  | 1   | 53 | RDR2-sensitive |
| GTGGGCCAAAGCCTTCGTCGGAGA  | 0   | 9  | RDR2-sensitive |
| GTGGGCCACGGACGAGAGGGCGCA  | 0   | 14 | RDR2-sensitive |
| GTGGGCCAGGCTTAGACAGAGAAT  | 1   | 15 | RDR2-sensitive |
| GTGGGCCATTGGATGCAAAGATAG  | 2   | 14 | RDR2-sensitive |
| GTGGGCCCAAGCACTTAGGAACGG  | 0   | 11 | RDR2-sensitive |
| GTGGGCCCAGCTATTTTCGTCGGT  | 0   | 9  | RDR2-sensitive |
| GTGGGCCCAGGCAACACAAGACAC  | 0   | 10 | RDR2-sensitive |
| GTGGGCCCGATGACATACTGGCGA  | 0   | 11 | RDR2-sensitive |
| GTGGGCCGATAGAACGGACGGTGC  | 0   | 10 | RDR2-sensitive |
| GTGGGCCTGGACTGAGAGGGGCCG  | 0   | 11 | RDR2-sensitive |
| GTGGGCGCTGTAGGGGCACCGCTG  | 1   | 24 | RDR2-sensitive |
| GTGGGCTAACGACGACGGATCAGA  | 112 | 15 | RDR2-resistant |
| GTGGGCTCGTCCGACATGACACGG  | 0   | 13 | RDR2-sensitive |
| GTGGGCTCTCTAGGCACGGCTCGT  | 1   | 16 | RDR2-sensitive |
| GTGGGCTCTCTGGCTGGACCGGT   | 0   | 9  | RDR2-sensitive |
| GTGGGCTGCGACGCTACGTAGAAG  | 0   | 18 | RDR2-sensitive |
| GTGGGCTGGCACGGCATGACCCGC  | 0   | 21 | RDR2-sensitive |
| GTGGGCTGGTAGACAAAAGGCGGT  | 0   | 9  | RDR2-sensitive |
| GTGGGCTGGTTACGCGCGGGTTGT  | 0   | 15 | RDR2-sensitive |
| GTGGGCTGTGACGGCTTAGGCCAT  | 0   | 11 | RDR2-sensitive |
| GTGGGCTTCTGACGGATACGGCCA  | 0   | 11 | RDR2-sensitive |
| GTGGGGAAGTGTAGACGATACGGT  | 0   | 13 | RDR2-sensitive |
| GTGGGGAATGTTAGGAGTGGCTGC  | 0   | 24 | RDR2-sensitive |
| GTGGGGAATTCTGTGGTCGGCTGG  | 2   | 14 | RDR2-sensitive |
| GTGGGGCAGAACATGATGCACGGT  | 0   | 24 | RDR2-sensitive |

|                          |    |     |                |
|--------------------------|----|-----|----------------|
| GTGGGGCGATAACGTAGAAGACAA | 0  | 19  | RDR2-sensitive |
| GTGGGGCGATAACGTAGGAGACAA | 0  | 20  | RDR2-sensitive |
| GTGGGGCTCGTTGCTGAAGGCTAG | 0  | 15  | RDR2-sensitive |
| GTGGGGGCACGTAGATGGCAGAAC | 0  | 17  | RDR2-sensitive |
| GTGGGGGTAGATGTGAGCAAGACG | 0  | 9   | RDR2-sensitive |
| GTGGGGTACTGAGTCGCCTGCGAA | 0  | 11  | RDR2-sensitive |
| GTGGGGTAGCTGTGCGGAAATGGC | 16 | 0   | RDR2-resistant |
| GTGGGTAAAGATGCGCAACCTCTG | 1  | 14  | RDR2-sensitive |
| GTGGGTCACTGTAGAGGATCCGGC | 0  | 20  | RDR2-sensitive |
| GTGGGTCCACATGAGTCAATGACA | 0  | 23  | RDR2-sensitive |
| GTGGGTCCGATGGCATACTGACGA | 0  | 10  | RDR2-sensitive |
| GTGGGTCCGATGGCATACTGGCGA | 6  | 323 | RDR2-sensitive |
| GTGGGTCCGATGGCATACTGGCGC | 0  | 14  | RDR2-sensitive |
| GTGGGTCCGATGGCATACTGGCGT | 0  | 9   | RDR2-sensitive |
| GTGGGTCCGATGTCATACTGGCGA | 0  | 12  | RDR2-sensitive |
| GTGGGTCTCCGAGCACCAGACAC  | 2  | 14  | RDR2-sensitive |
| GTGGGTCTCTCTGCGCAAACGGTC | 1  | 17  | RDR2-sensitive |
| GTGGGTCTCTGTGCTGGACGAGGC | 0  | 12  | RDR2-sensitive |
| GTGGGTCTGGACTGTTGACGGAG  | 0  | 12  | RDR2-sensitive |
| GTGGGTCTGGGCCGGACAGTGCAT | 0  | 12  | RDR2-sensitive |
| GTGGGTCTGGTCCGACGACGCGCA | 0  | 18  | RDR2-sensitive |
| GTGGGTGGGGTGTGTGACGAGCAT | 0  | 10  | RDR2-sensitive |
| GTGGGTTCTGGAACATGTTGAGGT | 0  | 12  | RDR2-sensitive |
| GTGGGTTGTCGCCAGAGAGAACGG | 0  | 13  | RDR2-sensitive |
| GTGGGTTGTGGAAGGGCGCGCGTG | 0  | 12  | RDR2-sensitive |
| GTGGTACAAGGACGAACGACAGGA | 0  | 13  | RDR2-sensitive |
| GTGGTACCGGTAGAACTGCCACGG | 0  | 23  | RDR2-sensitive |
| GTGGTACTATGTGGGAGCGTTGCA | 0  | 11  | RDR2-sensitive |
| GTGGTACTGTAGCAGCACGAAGTC | 0  | 10  | RDR2-sensitive |
| GTGGTAGACGGGCTGCTCTCCCAA | 0  | 9   | RDR2-sensitive |
| GTGGTAGAGAGGAAGAACAGGACG | 2  | 22  | RDR2-sensitive |
| GTGGTATAGAGTGCTGATCAGGAC | 0  | 10  | RDR2-sensitive |
| GTGGTATAGATCGGGCTAGCACGG | 0  | 72  | RDR2-sensitive |
| GTGGTCAACGCACGGCATGAGCTT | 2  | 26  | RDR2-sensitive |
| GTGGTCAGGTTGGCTCGACTCGGA | 0  | 10  | RDR2-sensitive |
| GTGGTCCGATGTAGAGTGGACGGT | 0  | 95  | RDR2-sensitive |
| GTGGTCGAGATTACTTAGGGCGGT | 1  | 23  | RDR2-sensitive |
| GTGGTCGGTCATGGTATGTGAGGC | 0  | 14  | RDR2-sensitive |
| GTGGTCTAGATCATGTGCTCGGTG | 0  | 11  | RDR2-sensitive |
| GTGGTCTGCTGTAGAGATGGCCAA | 1  | 27  | RDR2-sensitive |
| GTGGTCTGGTGGAAGGGAGGGCT  | 1  | 32  | RDR2-sensitive |
| GTGGTCTGTGGAGGGAGCAGCAGC | 0  | 13  | RDR2-sensitive |
| GTGGTGAAAGCCGAGGCCGTGGGG | 15 | 0   | RDR2-resistant |
| GTGGTGTACTCTAATGAGCTGGAC | 19 | 0   | RDR2-resistant |
| GTGGTGTAGTGCTAAACGGGCTAA | 0  | 9   | RDR2-sensitive |
| GTGGTGTAGTGCTAAACGGGCTAT | 0  | 12  | RDR2-sensitive |
| GTGGTTCGGGCTGAAACGACGA   | 0  | 9   | RDR2-sensitive |
| GTGGTGGCTCTGGTGGTCCGCAT  | 0  | 9   | RDR2-sensitive |
| GTGGTGTGTAGTCCGATATCAC   | 0  | 11  | RDR2-sensitive |

|                            |     |     |                |
|----------------------------|-----|-----|----------------|
| GTGGTTTATTATAGTTGGATAACT   | 56  | 1   | RDR2-resistant |
| GTGGTTTCGCTTCGGTTCGCTCGG   | 1   | 37  | RDR2-sensitive |
| GTGTAAGTTGTATTGAAGGGCA     | 20  | 0   | RDR2-resistant |
| GTGTAACACTCGGCAAAGAAGGCT   | 3   | 20  | RDR2-sensitive |
| GTGTAACACTCGGCAAAGAGGCTC   | 1   | 16  | RDR2-sensitive |
| GTGTAACACTCGAGCTCGACGACATA | 0   | 16  | RDR2-sensitive |
| GTGTACATTCGGGCTGCACGGCTT   | 0   | 17  | RDR2-sensitive |
| GTGTACCACCGGACTGTTTCGACGG  | 0   | 15  | RDR2-sensitive |
| GTGTACCACTCTGGGCCGGCGTAA   | 0   | 47  | RDR2-sensitive |
| GTGTACCCGTCGGAAACAGTGCAA   | 0   | 19  | RDR2-sensitive |
| GTGTACGACGGAGACTGAGCCAGA   | 0   | 9   | RDR2-sensitive |
| GTGTACGAGCCTCTGGTCGATGGT   | 18  | 0   | RDR2-resistant |
| GTGTACGTCCGGACGGTCCGCGCA   | 0   | 11  | RDR2-sensitive |
| GTGTACTCTAATGAGCTGGACGCA   | 828 | 116 | RDR2-resistant |
| GTGTACTCTAGGGCGATTGTCGAA   | 0   | 9   | RDR2-sensitive |
| GTGTAGAACACTCGGCACATCCAA   | 0   | 30  | RDR2-sensitive |
| GTGTAGAAGCGACGGAGTTCACCA   | 0   | 13  | RDR2-sensitive |
| GTGTAGACGTGTATGCAGTATGCA   | 0   | 10  | RDR2-sensitive |
| GTGTAGATCTGAGCAAGGCGTCGA   | 1   | 18  | RDR2-sensitive |
| GTGTAGCAGGCTGCACCGAAGACT   | 33  | 0   | RDR2-resistant |
| GTGTAGCGAAGACTGCATGGACAG   | 0   | 12  | RDR2-sensitive |
| GTGTAGCGGAGTAGTAGACCGGCG   | 0   | 10  | RDR2-sensitive |
| GTGTAGCTCTGCGGACGGTGATTT   | 0   | 25  | RDR2-sensitive |
| GTGTAGCTTTCTTCACGTTGGGAT   | 18  | 0   | RDR2-resistant |
| GTGTAGGACACTCGGCACAGCCAA   | 1   | 16  | RDR2-sensitive |
| GTGTAGGACACTCGGCACAGTCAA   | 0   | 11  | RDR2-sensitive |
| GTGTAGGATCTAGGACACCGGCTA   | 1   | 14  | RDR2-sensitive |
| GTGTAGGATCTTAGGGCACGCAAA   | 17  | 0   | RDR2-resistant |
| GTGTAGTACTCGTAGGGATGGCAA   | 0   | 12  | RDR2-sensitive |
| GTGTAGTCTGAGCTGGCAGCTGAC   | 0   | 37  | RDR2-sensitive |
| GTGTAGTGCTGACAGTAGTACTGC   | 0   | 9   | RDR2-sensitive |
| GTGTATAACTGTGACGTAGATGAC   | 108 | 6   | RDR2-resistant |
| GTGTATACATCGTGGACAGAGCAT   | 0   | 20  | RDR2-sensitive |
| GTGTATCATGGGATTGGAAGGCAT   | 15  | 0   | RDR2-resistant |
| GTGTATCCCTGTAGAGTACGGAAA   | 0   | 20  | RDR2-sensitive |
| GTGTATCCTCTGACGTCGACTGCA   | 0   | 10  | RDR2-sensitive |
| GTGTATCTCTGCGGACGACGATTT   | 0   | 11  | RDR2-sensitive |
| GTGTATTCTGAGAAGCAGCTGAAC   | 1   | 36  | RDR2-sensitive |
| GTGTCACATCGGACGGTCCGCAAC   | 0   | 10  | RDR2-sensitive |
| GTGTCACATCTGTAGACGACGGTT   | 0   | 15  | RDR2-sensitive |
| GTGTCAGACCATGGATCGAGGGCT   | 0   | 14  | RDR2-sensitive |
| GTGTCAGACTCATAGAGGACGCAC   | 0   | 11  | RDR2-sensitive |
| GTGTCAGACTTAGAACGACACGGT   | 1   | 39  | RDR2-sensitive |
| GTGTCAGGATAAGGTGTCAGGCGA   | 0   | 13  | RDR2-sensitive |
| GTGTCAGGCTGTGGGTTAAACGGG   | 0   | 11  | RDR2-sensitive |
| GTGTCAGTACGTGGATCCGACGGT   | 1   | 12  | RDR2-sensitive |
| GTGTCATCGTGGACTTGTTGGCGT   | 0   | 10  | RDR2-sensitive |
| GTGTCATCTCTGGACACTCGGCAA   | 3   | 22  | RDR2-sensitive |
| GTGTCCCTGGGGATGTGTTTCGTC   | 0   | 11  | RDR2-sensitive |

|                             |    |    |                |
|-----------------------------|----|----|----------------|
| GTGTCCTATGTAGACACTCGGCAA    | 0  | 27 | RDR2-sensitive |
| GTGTCCTCTATAGATCGGATCGGA    | 0  | 9  | RDR2-sensitive |
| GTGTCCTCTGTAGACACTCGGCAA    | 1  | 18 | RDR2-sensitive |
| GTGTCGCGGCACGACGATCTGGAT    | 0  | 15 | RDR2-sensitive |
| GTGTCGGCACTGTAGGTCGGCTTG    | 0  | 20 | RDR2-sensitive |
| GTGTCGTCATGGACTIONGTGCGGCGT | 0  | 14 | RDR2-sensitive |
| GTGTCGTGACAGATGGGCCGACGG    | 0  | 13 | RDR2-sensitive |
| GTGTCGTGCCTGTAGCCCGGTGACAG  | 0  | 18 | RDR2-sensitive |
| GTGTCGTGCTGTGCTAGCCCGCGG    | 0  | 10 | RDR2-sensitive |
| GTGTCGTGGATATGTGTATGGGTA    | 0  | 9  | RDR2-sensitive |
| GTGTCGTTGTGGCTTTATCGGCGT    | 1  | 15 | RDR2-sensitive |
| GTGTCTACTGTACTGACGCTCGGC    | 0  | 14 | RDR2-sensitive |
| GTGTCTAGTGTGCGATCGGCCAT     | 0  | 29 | RDR2-sensitive |
| GTGTCTATCGGATTTGCGACGGGT    | 0  | 18 | RDR2-sensitive |
| GTGTCTGGACCGAAGGCGTGGCAC    | 1  | 28 | RDR2-sensitive |
| GTGTCTGGATGTTTGGATTGGCAT    | 0  | 9  | RDR2-sensitive |
| GTGTCTGGCAGACTGGTCCGAGGC    | 0  | 12 | RDR2-sensitive |
| GTGTCTGGGCTGAAGGCGTGGCAC    | 0  | 20 | RDR2-sensitive |
| GTGTCTGGTCGTGGAGGACGCGCA    | 0  | 11 | RDR2-sensitive |
| GTGTCTGTGCGACTGTGCGGTGGC    | 0  | 11 | RDR2-sensitive |
| GTGTCTTCACGAATTTCTGGGGCA    | 15 | 0  | RDR2-resistant |
| GTGTCTTCACGTCGGATAGCGGAG    | 0  | 25 | RDR2-sensitive |
| GTGTCTTCGTTGGACATTCGGCAA    | 0  | 26 | RDR2-sensitive |
| GTGTCTTCGTTGGACCGTGTGCGGC   | 1  | 37 | RDR2-sensitive |
| GTGTCTTCTGTGGACACTCGGCAA    | 0  | 14 | RDR2-sensitive |
| GTGTCTTGTGTGTTACTCGGTGCT    | 0  | 10 | RDR2-sensitive |
| GTGTCTTTCACTGTGGATAGGCGA    | 4  | 27 | RDR2-sensitive |
| GTGTCTTTTACTGTGGATAGGCGA    | 0  | 9  | RDR2-sensitive |
| GTGTCTTTTGTGCGGACACTCGGCA   | 0  | 15 | RDR2-sensitive |
| GTGTCTTTTGTGCGGCACTCGGCA    | 7  | 57 | RDR2-sensitive |
| GTGTGAAAGCGGGTTGAGAAGGCT    | 0  | 10 | RDR2-sensitive |
| GTGTGAACCTGCACCTGGGCGCAT    | 0  | 32 | RDR2-sensitive |
| GTGTGAACTGTTGGAGATGGTCGT    | 0  | 32 | RDR2-sensitive |
| GTGTGAAGCGCAGACTGCATGGAC    | 0  | 15 | RDR2-sensitive |
| GTGTGAAGCGCAGGTTGTATGGAC    | 0  | 16 | RDR2-sensitive |
| GTGTGAAGGCGGACAGATCTTCAT    | 0  | 10 | RDR2-sensitive |
| GTGTGAATCTGAGCGTCGGCAGGG    | 39 | 8  | RDR2-resistant |
| GTGTGAATTGCAGAATCCCGCGAA    | 17 | 1  | RDR2-resistant |
| GTGTGACACTCGGCAAAGAAGGCT    | 0  | 12 | RDR2-sensitive |
| GTGTGACCACGAGCAAATGACGCG    | 0  | 10 | RDR2-sensitive |
| GTGTGACTCTCTGTTGCGGCTGCAT   | 0  | 27 | RDR2-sensitive |
| GTGTGACTGAGGGAAGCACGTGTT    | 0  | 21 | RDR2-sensitive |
| GTGTGACTGATGGTGGGTCGCTAT    | 0  | 10 | RDR2-sensitive |
| GTGTGACTGCATGTGTATAGCGTA    | 0  | 12 | RDR2-sensitive |
| GTGTGAGACAGACGGTAGGCCAGA    | 0  | 27 | RDR2-sensitive |
| GTGTGAGGCGGAACGACGGACCAG    | 0  | 12 | RDR2-sensitive |
| GTGTGAGGGGGAGATTGTTGGGAA    | 1  | 28 | RDR2-sensitive |
| GTGTGAGTGGGAGAGTAGGTGCAT    | 0  | 13 | RDR2-sensitive |
| GTGTGAGTGTGTGTTGGGCCGAC     | 0  | 9  | RDR2-sensitive |



|                           |    |     |                |
|---------------------------|----|-----|----------------|
| GTGTGATCTCAGGCAGGACAGGCT  | 0  | 15  | RDR2-sensitive |
| GTGTGATCTGGATTGACGTGGCAC  | 1  | 17  | RDR2-sensitive |
| GTGTGATCTTTAGAACC GGCCATT | 0  | 15  | RDR2-sensitive |
| GTGTGCACTGTAGCGACGGTGGTC  | 2  | 26  | RDR2-sensitive |
| GTGTGCAGGCAGCCCGTCGGACAC  | 0  | 11  | RDR2-sensitive |
| GTGTGCCCTCTGAGTATCGGACGT  | 0  | 12  | RDR2-sensitive |
| GTGTGCGCGCTCGGCTATGGCAC   | 0  | 10  | RDR2-sensitive |
| GTGTGCGGGCGACTCGACGGGCAC  | 0  | 10  | RDR2-sensitive |
| GTGTGCGTCTGTGCTTGGGTTGGCA | 0  | 11  | RDR2-sensitive |
| GTGTGCGTGGTTGTA CTCCGGCAT | 0  | 9   | RDR2-sensitive |
| GTGTGCGTTGGCTGTGTGCGCGGC  | 7  | 117 | RDR2-sensitive |
| GTGTGCTCTGAAGTCTCTGCGGC   | 0  | 10  | RDR2-sensitive |
| GTGTGCTGGAGACGGTTTGAGTGA  | 33 | 3   | RDR2-resistant |
| GTGTGCTGTAGTAGTGGGCACGGC  | 0  | 10  | RDR2-sensitive |
| GTGTGCTGTAGTTGGATGGCCATC  | 0  | 11  | RDR2-sensitive |
| GTGTGCTGTTTCTCTGCAGGGCAA  | 0  | 13  | RDR2-sensitive |
| GTGTGGAACGCGCGCTCGGCGAA   | 0  | 10  | RDR2-sensitive |
| GTGTGGAACGTACAACGGCTGAGC  | 0  | 25  | RDR2-sensitive |
| GTGTGGAATCTGGTAGTAGGCTAT  | 0  | 16  | RDR2-sensitive |
| GTGTGGACTATGTGGAAGCGCAGC  | 0  | 21  | RDR2-sensitive |
| GTGTGGACTGGACAAGAAGGAGGA  | 0  | 14  | RDR2-sensitive |
| GTGTGGATTCACGGAAGCGAACGG  | 0  | 12  | RDR2-sensitive |
| GTGTGGCTATAGACGGTACATGAA  | 23 | 3   | RDR2-resistant |
| GTGTGGGCAGAACCAGGATGAGAA  | 0  | 9   | RDR2-sensitive |
| GTGTGGGCAGTGATGGACAAGGAT  | 0  | 11  | RDR2-sensitive |
| GTGTGGGCATAAGAGGAAGGAGGA  | 0  | 9   | RDR2-sensitive |
| GTGTGGGCCTCTGGTGAGACACGC  | 0  | 15  | RDR2-sensitive |
| GTGTGGGCTCTGACGCACGGGCAA  | 1  | 24  | RDR2-sensitive |
| GTGTGGGCTGGTTACGCGCGGGTT  | 0  | 16  | RDR2-sensitive |
| GTGTGGGTCGGCACCATTTGTTGGG | 0  | 11  | RDR2-sensitive |
| GTGTGTAGACTGATAGTGGCGCAA  | 0  | 14  | RDR2-sensitive |
| GTGTGTAGGATCTAGGACACCGGC  | 0  | 9   | RDR2-sensitive |
| GTGTGTAGGCTTACGATACGGTAC  | 0  | 39  | RDR2-sensitive |
| GTGTGTCAGACTCATAGAGGACGC  | 0  | 15  | RDR2-sensitive |
| GTGTGTCGTCGTAATACATGGGCA  | 42 | 1   | RDR2-resistant |
| GTGTGTCTGCACGTGTCGGGCGAA  | 0  | 9   | RDR2-sensitive |
| GTGTGTCTGCGATTGTCTAGCCAC  | 0  | 13  | RDR2-sensitive |
| GTGTGTGACTGAGGGAAGCACGTG  | 0  | 12  | RDR2-sensitive |
| GTGTGTGAGTGTGTGGACCGGCAC  | 0  | 32  | RDR2-sensitive |
| GTGTGTGCGGACAGCCCCGACGGA  | 0  | 12  | RDR2-sensitive |
| GTGTGTGCGTAGAGATGACGACAT  | 0  | 9   | RDR2-sensitive |
| GTGTGTGGACGAGGTAGCGAAGGC  | 43 | 5   | RDR2-resistant |
| GTGTGTGTCGGCAACAAAAGCATG  | 40 | 0   | RDR2-resistant |
| GTGTGTGTGAGTGTGTGGACCGGC  | 0  | 15  | RDR2-sensitive |
| GTGTGTGTGAGTGTGTGGGCCGGC  | 0  | 9   | RDR2-sensitive |
| GTGTGTTTCGCGGGGACGGGGACGG | 0  | 17  | RDR2-sensitive |
| GTGTGTTGACTGTATTTAGGTTTA  | 0  | 14  | RDR2-sensitive |
| GTGTGTTGCGACGGCTTACAACAA  | 0  | 11  | RDR2-sensitive |
| GTGTGTTTCGGACGTGTCGCGGCA  | 0  | 14  | RDR2-sensitive |

|                           |    |     |                |
|---------------------------|----|-----|----------------|
| GTGTGTTTGGTTGCTTGGACGTGT  | 0  | 24  | RDR2-sensitive |
| GTGTGTTTGGTTGTAGTTGCATC   | 0  | 29  | RDR2-sensitive |
| GTGTTAATATATTTTCGTTGGAGAC | 16 | 0   | RDR2-resistant |
| GTGTTACCTCGGCGCCACAGGCTA  | 0  | 9   | RDR2-sensitive |
| GTGTTAGACTGGTATACAATCCTC  | 0  | 10  | RDR2-sensitive |
| GTGTTCCATGGACGACTCGTCGGG  | 0  | 9   | RDR2-sensitive |
| GTGTTCTGTGGCATCGTACGGACA  | 0  | 9   | RDR2-sensitive |
| GTGTTGAACTTGGCCGAACCACGG  | 0  | 9   | RDR2-sensitive |
| GTGTTGAAGGCAGATACTCGGCAA  | 0  | 18  | RDR2-sensitive |
| GTGTTGAATTCTGATCGACTGCAT  | 0  | 38  | RDR2-sensitive |
| GTGTTGACGCGGATAGGACAACGG  | 0  | 15  | RDR2-sensitive |
| GTGTTGACTAAGTGACGGACACTG  | 0  | 9   | RDR2-sensitive |
| GTGTTGACTTTGACTGATCGTCTG  | 0  | 9   | RDR2-sensitive |
| GTGTTGATTGTAGTATTGTCCGGA  | 0  | 10  | RDR2-sensitive |
| GTGTTGCTAGTAGAACGGACGGAC  | 0  | 29  | RDR2-sensitive |
| GTGTTGCTGGAAACGGAGACGGAT  | 1  | 25  | RDR2-sensitive |
| GTGTTGGACATGGTCTGTAGGCAT  | 0  | 33  | RDR2-sensitive |
| GTGTTGGGGCGAAGGCAAAGACGC  | 0  | 15  | RDR2-sensitive |
| GTGTTGGGGCGAAGGCGAAGACGC  | 0  | 14  | RDR2-sensitive |
| GTGTTGGTCTGTGGAGACGGTCTA  | 0  | 25  | RDR2-sensitive |
| GTGTTGGTCTGTGGGGACGATATA  | 0  | 19  | RDR2-sensitive |
| GTGTTGTAGGACTGCAGGGAGGAC  | 1  | 14  | RDR2-sensitive |
| GTGTTGTTCTGTGGGGATGGTCTA  | 0  | 11  | RDR2-sensitive |
| GTGTTTAACGTGGGGCTGAGAGGC  | 2  | 24  | RDR2-sensitive |
| GTGTTTAGACTGTGTTCCACCGCAT | 0  | 10  | RDR2-sensitive |
| GTGTTTCGCTGGGACAGTGGACGG  | 0  | 24  | RDR2-sensitive |
| GTGTTTCTAGGAGTAGGACGGTGC  | 18 | 0   | RDR2-resistant |
| GTGTTTCTGTTGGGCGGCGGGCTT  | 4  | 18  | RDR2-sensitive |
| GTGTTTGCCTCACCTGGCCGGCTC  | 0  | 11  | RDR2-sensitive |
| GTGTTTGGACCAGGCTAAATTCGT  | 0  | 13  | RDR2-sensitive |
| GTGTTTGGACCGGGCTAAATTCGT  | 0  | 72  | RDR2-sensitive |
| GTGTTTGGTAATCTGGAACGGAGC  | 1  | 13  | RDR2-sensitive |
| GTGTTTGGTATTGTAGAACGGAGC  | 0  | 9   | RDR2-sensitive |
| GTGTTTGGTTGTGAGTCAAGACGG  | 0  | 12  | RDR2-sensitive |
| GTGTTTGTGACTAGATTCTCGGA   | 0  | 9   | RDR2-sensitive |
| GTGTTTTTAGGAGTAGGACGGTGT  | 70 | 327 | RDR2-sensitive |
| GTGTTTTTATCGTCACTCGGCAA   | 0  | 14  | RDR2-sensitive |
| GTGTTTTTTTCGGGCACTCGGCAA  | 3  | 17  | RDR2-sensitive |
| GTAAAAAGCTCGTAGTTGGACCT   | 62 | 5   | RDR2-resistant |
| GTTAACTGTAGATATAAGGCTG    | 0  | 12  | RDR2-sensitive |
| GTTAACTGTAGCTTTAGGGGAC    | 23 | 50  | RDR2-sensitive |
| GTTAACTGAGAGACGACGGCCTAG  | 0  | 10  | RDR2-sensitive |
| GTTAAGCGGACCGAGTTTGGGCGG  | 0  | 9   | RDR2-sensitive |
| GTTAAGTGCGCGGACGGCTTCCAG  | 6  | 100 | RDR2-sensitive |
| GTTAAGTGGGTGTAGATAGGCTAT  | 0  | 9   | RDR2-sensitive |
| GTTAATCGTTGGCGTGTCCCGGTA  | 0  | 10  | RDR2-sensitive |
| GTTACAGGCCTGAGACAGACGCGC  | 0  | 9   | RDR2-sensitive |
| GTTACATCGGAACGAGACCCGGAA  | 0  | 16  | RDR2-sensitive |
| GTTACCAACTGAGAATTAGGCGTC  | 0  | 31  | RDR2-sensitive |

|                          |     |     |                |
|--------------------------|-----|-----|----------------|
| GTTACCAGCTGAGAATTAGGCGTC | 12  | 145 | RDR2-sensitive |
| GTTACCAGTTGGAAGTGTTCGGGT | 0   | 10  | RDR2-sensitive |
| GTTACCGACTGTAGCTCGATGGTT | 8   | 139 | RDR2-sensitive |
| GTTACCGACTGTAGTCCGATGGTT | 0   | 10  | RDR2-sensitive |
| GTTACCTATGGATTGGACGGGATT | 1   | 12  | RDR2-sensitive |
| GTTACCTGTAGTGCACCGACGCGC | 0   | 10  | RDR2-sensitive |
| GTTACGAAATGCGAGGCTGAGGTA | 53  | 2   | RDR2-resistant |
| GTTACGCTGGCACAAACGGACGTC | 0   | 10  | RDR2-sensitive |
| GTTACGGAGAGCTGACGTCATGTC | 39  | 0   | RDR2-resistant |
| GTTACGTATGGATTGGACGGGATT | 0   | 10  | RDR2-sensitive |
| GTTACTCTTAGTAGGACTGGGCGT | 0   | 9   | RDR2-sensitive |
| GTTACTGGAGAGCGTAGAGGACCG | 0   | 10  | RDR2-sensitive |
| GTTACTGTCCATTGATGGCGTCGG | 0   | 13  | RDR2-sensitive |
| GTTACTGTGTTTCTTGGCGTGCTC | 0   | 9   | RDR2-sensitive |
| GTTACTGTTATTGATCGGCTCCAT | 53  | 10  | RDR2-resistant |
| GTTACTTCTAGTTAGAACGTCGTT | 42  | 9   | RDR2-resistant |
| GTTAGAATGGACGGAGACGACGAC | 0   | 9   | RDR2-sensitive |
| GTTAGACGTGTGGTAGATATGGTT | 0   | 21  | RDR2-sensitive |
| GTTAGACTGTGTGTGGGTCAGGGC | 0   | 10  | RDR2-sensitive |
| GTTAGACTGTGTGTGTGGGCCGGC | 0   | 11  | RDR2-sensitive |
| GTTAGAGCTCGTCCTTATAGGCAT | 102 | 0   | RDR2-resistant |
| GTTAGAGCTCGTTCTTATAGGCAT | 127 | 3   | RDR2-resistant |
| GTTAGATAGCACGGACACGGTAGC | 0   | 14  | RDR2-sensitive |
| GTTAGATCCAGGTGCTGTTGGCAA | 0   | 10  | RDR2-sensitive |
| GTTAGATGGGAGACGGACACCAG  | 0   | 11  | RDR2-sensitive |
| GTTAGCTGGCTGTGGGCCGTCGGA | 0   | 19  | RDR2-sensitive |
| GTTAGGAGCAGTAGAAAGCGGGTT | 0   | 14  | RDR2-sensitive |
| GTTAGGAGCCGGCGTACACTGTTA | 0   | 31  | RDR2-sensitive |
| GTTAGGCACGGCACTGTTAGGCAC | 0   | 9   | RDR2-sensitive |
| GTTAGGCTCTGCAGACACGAGCAA | 0   | 9   | RDR2-sensitive |
| GTTAGGCTGTGGCGTCTAGGCAT  | 1   | 50  | RDR2-sensitive |
| GTTAGGCTGTGGCGTTCTAGGCAT | 0   | 32  | RDR2-sensitive |
| GTTAGGGTTCCTAGTTTCTCGCGG | 0   | 12  | RDR2-sensitive |
| GTTAGGTAAGGACGGATGGGTTG  | 0   | 14  | RDR2-sensitive |
| GTTAGGTGGGAAGTCTAGCGGCTC | 0   | 57  | RDR2-sensitive |
| GTTAGGTTGCTGGGAAGAGAGCGG | 0   | 15  | RDR2-sensitive |
| GTTAGTAGATCGGCTCGACTCGGC | 0   | 9   | RDR2-sensitive |
| GTTAGTAGCTCGGCTCGACTCGGC | 2   | 21  | RDR2-sensitive |
| GTTAGTAGGCTGGCATGACGTGCT | 3   | 22  | RDR2-sensitive |
| GTTAGTATGGTAGGGCTGACGCGG | 0   | 28  | RDR2-sensitive |
| GTTAGTCAGCTGGAGGAGATAGGT | 0   | 9   | RDR2-sensitive |
| GTTAGTCAGGCGAGACAATGGCAT | 1   | 13  | RDR2-sensitive |
| GTTAGTCTGTGGGATGTGGCTGGC | 0   | 12  | RDR2-sensitive |
| GTTAGTGAAGTGGCTCGATTCGGC | 0   | 10  | RDR2-sensitive |
| GTTAGTTGCCACTGTATGGAAGAA | 21  | 1   | RDR2-resistant |
| GTTAGTTGCCTGAACGACGACGAC | 0   | 9   | RDR2-sensitive |
| GTTAGTTGGGCCGCGATTGGTGTT | 31  | 0   | RDR2-resistant |
| GTTATATATTGCAGAGGACTACAT | 14  | 0   | RDR2-resistant |
| GTTATATCGTATGAGTATGGCGTG | 18  | 0   | RDR2-resistant |

|                            |     |    |                |
|----------------------------|-----|----|----------------|
| GTTATCGACTGTAGCTCGATGGTT   | 6   | 36 | RDR2-sensitive |
| GTTATCGGGCTGAACCATGCCGGA   | 0   | 17 | RDR2-sensitive |
| GTTATCTCCGACGGCTGCCTATGC   | 0   | 10 | RDR2-sensitive |
| GTTATCTGGAACAGTGGACGACGG   | 0   | 12 | RDR2-sensitive |
| GTTATCTGGACTAATGGGCGGCAC   | 3   | 29 | RDR2-sensitive |
| GTTATCTGGTGGACCTGCAGGTGG   | 0   | 36 | RDR2-sensitive |
| GTTATGACCCTGACACTCGGCAAA   | 0   | 12 | RDR2-sensitive |
| GTTATGACTGTGGGGGATGTCGGC   | 0   | 16 | RDR2-sensitive |
| GTTATGGACTGGCATGGTGGCGAG   | 0   | 19 | RDR2-sensitive |
| GTTATGGATTTAAATCGGCTCAAT   | 0   | 10 | RDR2-sensitive |
| GTTATGTAGACTGACGGGACACAG   | 0   | 9  | RDR2-sensitive |
| GTTATGTCCGACGGCTACTGACAA   | 3   | 19 | RDR2-sensitive |
| GTTATGTCTGGCGGCGAAGATGT    | 0   | 9  | RDR2-sensitive |
| GTTATGTCTGGTCCGAAGCATGGC   | 0   | 9  | RDR2-sensitive |
| GTTATGTGACTGATTATGGTGGTA   | 159 | 12 | RDR2-resistant |
| GTTATTGGTCTGCAGACGAGGCAT   | 0   | 42 | RDR2-sensitive |
| GTTATTTTCGGCCCCGGGACTGGCAC | 0   | 11 | RDR2-sensitive |
| GTTATTTCTGTAGCCTGTGCGGCT   | 0   | 9  | RDR2-sensitive |
| GTTATTTTCGTTGGGCCACGCCAT   | 0   | 9  | RDR2-sensitive |
| GTTCAACGTGAGGACGGTACGGAT   | 1   | 20 | RDR2-sensitive |
| GTTCAATTGGACCAGGCTGAGGCT   | 0   | 19 | RDR2-sensitive |
| GTTCAATTGGTCCAGGCTGAGGCT   | 0   | 10 | RDR2-sensitive |
| GTTCACAAGGTAACCATCGTCGTA   | 0   | 17 | RDR2-sensitive |
| GTTCACCGGACTAAGCGTTGCATA   | 0   | 14 | RDR2-sensitive |
| GTTCACGCGGACTTGGCATTGCT    | 1   | 23 | RDR2-sensitive |
| GTTCACTCTGTAGCAACGCACGGG   | 0   | 12 | RDR2-sensitive |
| GTTCACTTTTTGACTGACTGGCAT   | 14  | 0  | RDR2-resistant |
| GTTCAGAAGTCTGCGGCTTATAG    | 0   | 9  | RDR2-sensitive |
| GTTCAGACCGTAGCAAGTGGTGAC   | 0   | 17 | RDR2-sensitive |
| GTTCAGGACTTATTTCCGACGGTT   | 0   | 17 | RDR2-sensitive |
| GTTCAGGATTGGGGCAGGAATGGT   | 0   | 11 | RDR2-sensitive |
| GTTCAGGATTGGGGGCAGGAACGG   | 0   | 9  | RDR2-sensitive |
| GTTCATCGGCGATCTCTTGGTGAC   | 0   | 11 | RDR2-sensitive |
| GTTCATCGTCACGACGTTCCGCCGT  | 0   | 9  | RDR2-sensitive |
| GTTCATGACTGGTGGCCGGACGGT   | 0   | 38 | RDR2-sensitive |
| GTTCATGGCTCTGGACTGGACGAT   | 1   | 12 | RDR2-sensitive |
| GTTCATGTTGACTTTAGACGGTTT   | 0   | 9  | RDR2-sensitive |
| GTTCCAATTCGTGTCGGGCCTCGG   | 0   | 10 | RDR2-sensitive |
| GTTCCAGAGCTCTTCAAGTAGATT   | 20  | 0  | RDR2-resistant |
| GTTCCAGTCTGCTAGAGGACGT     | 0   | 19 | RDR2-sensitive |
| GTTCCATGGACTCGGGAGCGGTAT   | 0   | 12 | RDR2-sensitive |
| GTTCCCATCAGATCGTCACGCGGT   | 0   | 10 | RDR2-sensitive |
| GTTCCCATGGCAGTGTAGGACGGA   | 0   | 53 | RDR2-sensitive |
| GTTCCCGACCTAGAACGACGAGGA   | 0   | 9  | RDR2-sensitive |
| GTTCCCTGCCTGACGGTCCGACGG   | 0   | 18 | RDR2-sensitive |
| GTTCCCTGTAGTAGTGACGGGCAC   | 0   | 14 | RDR2-sensitive |
| GTTCCGACGGCTGCTATACGGACC   | 26  | 4  | RDR2-resistant |
| GTTCCGCGGAGTGCAGAGAGGCGT   | 0   | 9  | RDR2-sensitive |
| GTTCCGTTTACTGTAGTGACGACC   | 0   | 11 | RDR2-sensitive |

|                             |     |     |                |
|-----------------------------|-----|-----|----------------|
| G TTCCTATA ACCCAGGTCGCGGATC | 0   | 10  | RDR2-sensitive |
| G TTCCTGGCAGCAAGATACCTGAT   | 0   | 10  | RDR2-sensitive |
| G TTCCTGTAGCGAGCCGAGCCGAG   | 1   | 34  | RDR2-sensitive |
| G TTCCTGTCTGACGGCCGAACGGT   | 0   | 10  | RDR2-sensitive |
| G TTCCTTATTGGACGATGTAGAGA   | 0   | 10  | RDR2-sensitive |
| G TTCCTTCAGGATGGTGAGACGTA   | 0   | 13  | RDR2-sensitive |
| G TTCCTTCGGTTCCGTTAGTTCCG   | 8   | 62  | RDR2-sensitive |
| G TTCCTTGTTGGACGGCGTAGAGA   | 0   | 25  | RDR2-sensitive |
| G TTCGAACCGTAGACCGTCCGGCC   | 1   | 129 | RDR2-sensitive |
| G TTCGACACCTGGCAGAAGGACCG   | 0   | 9   | RDR2-sensitive |
| G TTCGACGGACCATTACGCGCAT    | 0   | 9   | RDR2-sensitive |
| G TTCGACGTGGTGCTCTACGGCAC   | 1   | 22  | RDR2-sensitive |
| G TTCGACGTGGTGCTCTGCGGCAC   | 0   | 11  | RDR2-sensitive |
| G TTCGAGCTGTGGAAGATGGCCCT   | 0   | 16  | RDR2-sensitive |
| G TTCGATCTGACAGGAGTAGGGAT   | 0   | 10  | RDR2-sensitive |
| G TTCGATGACTGGCATGTAAGCAG   | 0   | 12  | RDR2-sensitive |
| G TTCGATGACTTATCTGACGGCCG   | 2   | 17  | RDR2-sensitive |
| G TTCGCAACTCTGGATCGGACGGT   | 0   | 12  | RDR2-sensitive |
| G TTCGCATCTCTAGAGCCAGGCTT   | 0   | 10  | RDR2-sensitive |
| G TTCGCCGCGGACGACTCACCGGA   | 0   | 9   | RDR2-sensitive |
| G TTCGCGACCTGGAGCAGGGCTAG   | 0   | 9   | RDR2-sensitive |
| G TTCGCGCGTGTGGACCGGACGGT   | 0   | 9   | RDR2-sensitive |
| G TTCGCGGCTAAGGGTCGGACGGT   | 0   | 15  | RDR2-sensitive |
| G TTCGCGGGGACGAGGACGGAGAA   | 0   | 33  | RDR2-sensitive |
| G TTCGCTCTGTTCCCTGCGTCGGT   | 0   | 9   | RDR2-sensitive |
| G TTCGGAACCGGGTCGGGAACGGC   | 0   | 21  | RDR2-sensitive |
| G TTCGGACCGGGCCAAAAGCGG     | 0   | 19  | RDR2-sensitive |
| G TTCGGAGCGATGTAGGGAAGGAG   | 0   | 17  | RDR2-sensitive |
| G TTCGGATATCGGATATAAGTCGT   | 0   | 13  | RDR2-sensitive |
| G TTCGGATCTGGTAGTTTAGCGGC   | 61  | 0   | RDR2-resistant |
| G TTCGGATGATCGCATGCAATGAT   | 106 | 5   | RDR2-resistant |
| G TTCGGATGGCAGCTAGACTGTAC   | 0   | 16  | RDR2-sensitive |
| G TTCGGATTGTCCCGCGTAGCGGC   | 0   | 13  | RDR2-sensitive |
| G TTCGGCAAGCTCGACGACGACAC   | 0   | 16  | RDR2-sensitive |
| G TTCGGCAAGCTCGACGACGACAT   | 0   | 20  | RDR2-sensitive |
| G TTCGGCAAGGCTAGAGAATCGGT   | 0   | 9   | RDR2-sensitive |
| G TTCGGCACCAGCAGTAGCAGCTA   | 0   | 9   | RDR2-sensitive |
| G TTCGGCCCTGTGCTGCGGATCGT   | 0   | 11  | RDR2-sensitive |
| G TTCGGCGAACAGTACATCGGCAA   | 0   | 9   | RDR2-sensitive |
| G TTCGGCGAACTGTACATCGGCAA   | 0   | 17  | RDR2-sensitive |
| G TTCGGCGACTCCGACGGATCTAA   | 0   | 9   | RDR2-sensitive |
| G TTCGGCTAGACCGGAGGACCTGC   | 0   | 14  | RDR2-sensitive |
| G TTCGGCTAGACCGGAGACCTGC    | 0   | 9   | RDR2-sensitive |
| G TTCGGCTCGACTCGGATCGGCTC   | 0   | 11  | RDR2-sensitive |
| G TTCGGCTCGGCTCGGCTCGGCAT   | 0   | 12  | RDR2-sensitive |
| G TTCGGCTGCTTCGATGGCAACAA   | 1   | 41  | RDR2-sensitive |
| G TTCGGGCCGCTTAGAAGTGCGTA   | 2   | 31  | RDR2-sensitive |
| G TTCGGGCCGCTTAGAGATGCGTA   | 3   | 46  | RDR2-sensitive |

|                             |    |     |                |
|-----------------------------|----|-----|----------------|
| GTTTCGGGGTATTAATGTAGTCGG    | 1  | 17  | RDR2-sensitive |
| GTTTCGGGTCCGGGCGAAAACACCA   | 31 | 2   | RDR2-resistant |
| GTTTCGGGTCCGGGCGAAGCCACCA   | 17 | 0   | RDR2-resistant |
| GTTTCGGGTCCGGGCGACGCCACCA   | 14 | 0   | RDR2-resistant |
| GTTTCGGGTGTTCGGAGGCAAGAGGC  | 0  | 9   | RDR2-sensitive |
| GTTTCGGGTTGTGCCAGCGTAGCAT   | 0  | 10  | RDR2-sensitive |
| GTTTCGGTAGAGCGGGGGCAGTCTA   | 0  | 29  | RDR2-sensitive |
| GTTTCGGTCAATGCAACGGATGGTA   | 22 | 0   | RDR2-resistant |
| GTTTCGGTCCCTGTAAATTTAGGTT   | 0  | 10  | RDR2-sensitive |
| GTTTCGGTCTATTCGGGTTTGTGAA   | 0  | 20  | RDR2-sensitive |
| GTTTCGGTCTATTCGGTTTTGTGAA   | 0  | 29  | RDR2-sensitive |
| GTTTCGGTGAAGTGTATATCGGCAA   | 0  | 15  | RDR2-sensitive |
| GTTTCGGTGCGGACCGACGGCTCTC   | 0  | 22  | RDR2-sensitive |
| GTTTCGGTGGTTCTCAATGGGCGGT   | 0  | 16  | RDR2-sensitive |
| GTTTCGGTGTGGATGCAAACGCAGA   | 0  | 12  | RDR2-sensitive |
| GTTTCGGTTAGTAGTGGATTGACGG   | 0  | 11  | RDR2-sensitive |
| GTTTCGGTTCGGGTTTCGGGTTTCGGT | 0  | 15  | RDR2-sensitive |
| GTTTCGGTTGCTCAGGAACGGTGCC   | 0  | 11  | RDR2-sensitive |
| GTTTCGTAGGCTGGACGGTCCGCAA   | 0  | 13  | RDR2-sensitive |
| GTTTCGTGACTTGACGCAGGAGCGA   | 1  | 33  | RDR2-sensitive |
| GTTTCGTGTCCGGGCGAAAACACCA   | 35 | 2   | RDR2-resistant |
| GTTTCGTTGGGGTTCGGCTAGGGGC   | 1  | 12  | RDR2-sensitive |
| GTTTCGTTGGTTCGACGGCGAGCTTC  | 17 | 0   | RDR2-resistant |
| GTTTCGTTTCACGTCGGGTTTACCA   | 36 | 2   | RDR2-resistant |
| GTTCTAACTCGGACCAGGGGCGGA    | 0  | 9   | RDR2-sensitive |
| GTTCTAGACTGTAGGCGCATCCAT    | 0  | 10  | RDR2-sensitive |
| GTTCTAGATTGTAGGTTTTAGGCA    | 0  | 11  | RDR2-sensitive |
| GTTCTATTTCTTTAGGATCTTCGG    | 0  | 12  | RDR2-sensitive |
| GTTCTCATTCTTTAAGATCTTCGG    | 0  | 15  | RDR2-sensitive |
| GTTCTCCGTTGACTGTCTACGGCT    | 18 | 0   | RDR2-resistant |
| GTTCTCGGGCTGGTATGTTGACGC    | 6  | 33  | RDR2-sensitive |
| GTTCTCGGTGTAGATGTGGGCGCC    | 0  | 9   | RDR2-sensitive |
| GTTCTCGTGACTTGAGCGACGGAG    | 0  | 9   | RDR2-sensitive |
| GTTCTCTAGGAATCTCGTTAGGAT    | 14 | 0   | RDR2-resistant |
| GTTCTCTGAATTCGGCTCACTTAT    | 0  | 9   | RDR2-sensitive |
| GTTCTCTGCGGAAGCCTGGACGGT    | 0  | 15  | RDR2-sensitive |
| GTTCTCTGCGGGAGCGCTGACGGA    | 1  | 114 | RDR2-sensitive |
| GTTCTCTGGTCAGGCGCGGACGGT    | 0  | 14  | RDR2-sensitive |
| GTTCTCTGTGTGAGTGTGGACGGT    | 0  | 17  | RDR2-sensitive |
| GTTCTCTTTCTTTAGGATCTTCGG    | 6  | 85  | RDR2-sensitive |
| GTTCTGAACATCAAGCCGGTCCGA    | 0  | 13  | RDR2-sensitive |
| GTTCTGAATTGTATGAGAGACGTT    | 1  | 26  | RDR2-sensitive |
| GTTCTGAGCGTCGAGCCGGTCCGA    | 1  | 13  | RDR2-sensitive |
| GTTCTGATCTCTGTCTGTCGTGGC    | 0  | 17  | RDR2-sensitive |
| GTTCTGGAACGGGCTCGACGAGAT    | 0  | 11  | RDR2-sensitive |
| GTTCTGGACTCCTGGGAAGATGAA    | 1  | 21  | RDR2-sensitive |
| GTTCTGGCTGATATGACACGGTTC    | 0  | 11  | RDR2-sensitive |
| GTTCTGGGGCTATGGTAGAGGCAA    | 0  | 25  | RDR2-sensitive |
| GTTCTGGTTCTGGCTCGAGCGGAT    | 2  | 14  | RDR2-sensitive |

|                           |    |    |                |
|---------------------------|----|----|----------------|
| GTTCTGGTTCTGGCTCGGGCGGAT  | 1  | 16 | RDR2-sensitive |
| GTTCTGTAGATCCGTGCGGCGGGG  | 0  | 18 | RDR2-sensitive |
| GTTCTGTAGCGGGTGAGACGTTGA  | 0  | 9  | RDR2-sensitive |
| GTTCTGTAGGGTTTGGTCGGCACA  | 0  | 9  | RDR2-sensitive |
| GTTCTGTATTAAAGCGTAGACGAG  | 22 | 1  | RDR2-resistant |
| GTTCTGTGGCACTCGGCAAAGAGG  | 0  | 13 | RDR2-sensitive |
| GTTCTGTTTCGGGAGGTGCGCCGA  | 0  | 11 | RDR2-sensitive |
| GTTCTTAAGTTAAGTTCGTCCGGC  | 0  | 14 | RDR2-sensitive |
| GTTCTTACAGCGAGGTCGCGGATC  | 0  | 9  | RDR2-sensitive |
| GTTCTTACGGTAAGTTCGACGGCT  | 0  | 12 | RDR2-sensitive |
| GTTCTTCGGGCAAAGGATGGCATG  | 0  | 85 | RDR2-sensitive |
| GTTCTTGTGACTGAGGGAGGCTAC  | 2  | 14 | RDR2-sensitive |
| GTTCTTTAGGTTTCGTGCTGGGCAT | 88 | 1  | RDR2-resistant |
| GTTCTTTTTAGGATCTTCGGCTAC  | 0  | 10 | RDR2-sensitive |
| GTTCTTTTTTATGGTCTAGTCGGA  | 0  | 12 | RDR2-sensitive |
| GTTGAAACGAACAGCTGAGGGCCG  | 0  | 13 | RDR2-sensitive |
| GTTGAAACGACGGGCAGAACCGGT  | 0  | 12 | RDR2-sensitive |
| GTTGAACACATGGAGGACGAGAAT  | 0  | 10 | RDR2-sensitive |
| GTTGAACACTCGGCACAGGACTGC  | 0  | 10 | RDR2-sensitive |
| GTTGAACATGAACTGTGTCGGCGT  | 0  | 11 | RDR2-sensitive |
| GTTGAACCAGGCTGCAGGGACGAT  | 0  | 14 | RDR2-sensitive |
| GTTGAACGACTGACGATTTGACGG  | 0  | 45 | RDR2-sensitive |
| GTTGAACGGGTGAGCGGTACAGA   | 0  | 16 | RDR2-sensitive |
| GTTGAACTGGTCCAGGCTGAGGCT  | 0  | 14 | RDR2-sensitive |
| GTTGAACTTCGGAATTTCCGTATC  | 0  | 9  | RDR2-sensitive |
| GTTGAAGACATATTTGCTGCAGAC  | 18 | 1  | RDR2-resistant |
| GTTGAAGAGCCAAGTAGAACGGAA  | 0  | 11 | RDR2-sensitive |
| GTTGAAGAGCCAAGTAGAACGGAG  | 0  | 17 | RDR2-sensitive |
| GTTGAAGAGCCAAGTGGAACGGAG  | 0  | 9  | RDR2-sensitive |
| GTTGACACTGTCTTGGACGATGGC  | 2  | 14 | RDR2-sensitive |
| GTTGACACTTTGGACGCCGGCACA  | 0  | 12 | RDR2-sensitive |
| GTTGACCGCTGCAGTTGAAGAGTA  | 0  | 30 | RDR2-sensitive |
| GTTGACCTTCTGACCAGTCGGCAC  | 5  | 28 | RDR2-sensitive |
| GTTGACGAAGACCGCTATATTATT  | 50 | 2  | RDR2-resistant |
| GTTGACGCGGATAGGACAACGGTG  | 0  | 63 | RDR2-sensitive |
| GTTGACGCGTAGGACGTAATCCGG  | 0  | 19 | RDR2-sensitive |
| GTTGACGTGGCACCGAGCTCGGCG  | 1  | 30 | RDR2-sensitive |
| GTTGACTAAGTGACGGACACTGTT  | 0  | 9  | RDR2-sensitive |
| GTTGACTCTGGAGCTGTCATGACG  | 2  | 18 | RDR2-sensitive |
| GTTGACTCTGTAGCAACGCACGGG  | 0  | 51 | RDR2-sensitive |
| GTTGACTCTGTAGCAACGTACGGG  | 0  | 80 | RDR2-sensitive |
| GTTGACTGAGCACCGTTGGATGGA  | 0  | 11 | RDR2-sensitive |
| GTTGACTGGGAGACGACGACCTAG  | 0  | 9  | RDR2-sensitive |
| GTTGACTGGGAGACGACGGCCTAA  | 0  | 10 | RDR2-sensitive |
| GTTGACTGGGAGACGACGGCCTAG  | 0  | 36 | RDR2-sensitive |
| GTTGACTGGGAGACGATGGTCTAG  | 0  | 10 | RDR2-sensitive |
| GTTGACTGTAATAGTGTGGCCCAG  | 0  | 20 | RDR2-sensitive |
| GTTGACTGTACATGGTAGACGCAG  | 0  | 15 | RDR2-sensitive |
| GTTGACTGTACGCAAGGAACGGTA  | 0  | 26 | RDR2-sensitive |

|                            |    |     |                |
|----------------------------|----|-----|----------------|
| GTTGACTGTACGCGAGAAACGGTG   | 0  | 11  | RDR2-sensitive |
| GTTGACTGTACGCGAGGAACGGTG   | 0  | 16  | RDR2-sensitive |
| GTTGACTGTAGCTCGATGGTTCGT   | 0  | 11  | RDR2-sensitive |
| GTTGACTGTATTTAGGTTTATGAA   | 0  | 16  | RDR2-sensitive |
| GTTGACTGTGACCAGACGCGTGAT   | 1  | 22  | RDR2-sensitive |
| GTTGACTGTTGTTGCGGACGCGAG   | 0  | 12  | RDR2-sensitive |
| GTTGACTTTGTGGAAGCGTGTGTT   | 0  | 37  | RDR2-sensitive |
| GTTGAGAAATCATCGATCTGTGCA   | 16 | 0   | RDR2-resistant |
| GTTGAGAACTACGTTACCACGGAT   | 1  | 17  | RDR2-sensitive |
| GTTGAGAGTAGTGGAAGGCCGGGCT  | 46 | 2   | RDR2-resistant |
| GTTGAGCAGAGGACCTAATGGTGA   | 0  | 10  | RDR2-sensitive |
| GTTGAGCCCTGGCAGAACCGTGCA   | 0  | 11  | RDR2-sensitive |
| GTTGAGGAGCCAAGTAGAACGGAA   | 0  | 11  | RDR2-sensitive |
| GTTGAGGAGCCAAGTAGAACGGAG   | 0  | 99  | RDR2-sensitive |
| GTTGAGGATTGCGCGACGGATGAC   | 0  | 10  | RDR2-sensitive |
| GTTGAGGCCTGGCAACGATGGCGC   | 0  | 11  | RDR2-sensitive |
| GTTGAGGCTTGGCAACGACGGCGC   | 0  | 10  | RDR2-sensitive |
| GTTGAGGTTGCGGAAGCAGAGCGG   | 0  | 9   | RDR2-sensitive |
| GTTGAGTGGACAAGTAGAGCCGGC   | 0  | 13  | RDR2-sensitive |
| GTTGATACGGACCATTGGGGCGGC   | 0  | 16  | RDR2-sensitive |
| GTTGATAGGGCACAAGACGACGAG   | 0  | 16  | RDR2-sensitive |
| GTTGATCAAGGGACGCAGGGGCGT   | 0  | 13  | RDR2-sensitive |
| GTTGATCCAAGGGAACGCGCAGAG   | 1  | 12  | RDR2-sensitive |
| GTTGATCCAAGGGACACAGGGCGT   | 0  | 19  | RDR2-sensitive |
| GTTGATCGTGGGCGCGGGACCGGC   | 21 | 1   | RDR2-resistant |
| GTTGATCTACAGGGGCGGACCGTC   | 3  | 24  | RDR2-sensitive |
| GTTGATGCTGCAGAACTAGGCATT   | 0  | 100 | RDR2-sensitive |
| GTTGATGCTTCGGGCCGGGTCCGGG  | 0  | 21  | RDR2-sensitive |
| GTTGATGGAAGTTTGGTAGGGTT    | 40 | 1   | RDR2-resistant |
| GTTGATTAATTTGTACGGCTCGC    | 15 | 0   | RDR2-resistant |
| GTTGATTGGAAGCCGGATCGTCTG   | 0  | 15  | RDR2-sensitive |
| GTTGATTTGATGGATATAGATGGA   | 0  | 17  | RDR2-sensitive |
| GTTGCAACGCACGGGCATATACCT   | 0  | 10  | RDR2-sensitive |
| GTTGCAACGCACGGGTACTIONACCT | 0  | 10  | RDR2-sensitive |
| GTTGCAACGCACGGGTACTIONACCT | 0  | 13  | RDR2-sensitive |
| GTTGCAACTGTAGCTGCAGAGTCA   | 0  | 13  | RDR2-sensitive |
| GTTGCACGGACAACATCGGCTGGT   | 0  | 9   | RDR2-sensitive |
| GTTGCACGGATAGAAGGTTGGCGC   | 0  | 12  | RDR2-sensitive |
| GTTGCAGAGTGAACGGAACGGAGC   | 0  | 23  | RDR2-sensitive |
| GTTGCAGAGTGGACAGTTGACGCC   | 4  | 41  | RDR2-sensitive |
| GTTGCAGCTGTTTGGACTGCTGCA   | 4  | 31  | RDR2-sensitive |
| GTTGCAGGATGGCAGAACGGCAGA   | 1  | 21  | RDR2-sensitive |
| GTTGCATACGCGGATACGCTCGGA   | 0  | 13  | RDR2-sensitive |
| GTTGCATCCTTCGGTTGTCTGGCA   | 0  | 20  | RDR2-sensitive |
| GTTGCATCGACGGCAGCGCGACAC   | 1  | 49  | RDR2-sensitive |
| GTTGCATCGACGGCAGCGTGACTC   | 0  | 14  | RDR2-sensitive |
| GTTGCATCGGAAGAGGACGGACGA   | 0  | 49  | RDR2-sensitive |
| GTTGCATCTGTACTGTGAGTGCA    | 0  | 14  | RDR2-sensitive |
| GTTGCATGCAGACTGGGACCGGCT   | 0  | 10  | RDR2-sensitive |



|                           |    |     |                |
|---------------------------|----|-----|----------------|
| GTTGCATTAGTCGGATCAGGTCGG  | 0  | 10  | RDR2-sensitive |
| GTTGCCACGGCAGAGCTCGGCACC  | 0  | 14  | RDR2-sensitive |
| GTTGCCACTGGTGAAGCTGACGGA  | 0  | 12  | RDR2-sensitive |
| GTTGCCCTCGGCCTGGAACGGTGC  | 0  | 11  | RDR2-sensitive |
| GTTGCCGACTGTAGCTCGATGGTT  | 1  | 13  | RDR2-sensitive |
| GTTGCCGATGTACAGTTCGCCGAG  | 5  | 25  | RDR2-sensitive |
| GTTGCCGATTCCGACTGTCGTCGCT | 2  | 15  | RDR2-sensitive |
| GTTGCCGCACGTAGAGGACAGCGA  | 0  | 12  | RDR2-sensitive |
| GTTGCCGGAATTGGACGGGGACGG  | 0  | 27  | RDR2-sensitive |
| GTTGCCGGAGAAGGACACGACGAA  | 1  | 22  | RDR2-sensitive |
| GTTGCCGGAGAAGGATACGACGAA  | 0  | 11  | RDR2-sensitive |
| GTTGCCGGATAAGCAGAACCAGGC  | 1  | 26  | RDR2-sensitive |
| GTTGCGACGGCTCACAACAATACC  | 0  | 10  | RDR2-sensitive |
| GTTGCGACGGCTTACAACAATACC  | 1  | 14  | RDR2-sensitive |
| GTTGCGACTGGAGTAGAGACCGGT  | 0  | 13  | RDR2-sensitive |
| GTTGCGATGGCTGAATGACGGAAT  | 0  | 10  | RDR2-sensitive |
| GTTGCGCAGGACTAACGAAGGCAG  | 2  | 104 | RDR2-sensitive |
| GTTGCGCGGGACTAACGACGGCAG  | 1  | 17  | RDR2-sensitive |
| GTTGCGCGGGACTAACGGAGGCAG  | 0  | 31  | RDR2-sensitive |
| GTTGCGGAAGCAGAGCGGATCGGA  | 0  | 12  | RDR2-sensitive |
| GTTGCGGAGGATCGTTGTCGTCAT  | 0  | 9   | RDR2-sensitive |
| GTTGCGGATCAACGGCCTCGTCGC  | 0  | 9   | RDR2-sensitive |
| GTTGCGGATTGCGCGAGACAGTGT  | 0  | 18  | RDR2-sensitive |
| GTTGCGGCGACGGCATGAAGACAA  | 0  | 10  | RDR2-sensitive |
| GTTGCGGCTGGAGTAGAGACCGGG  | 0  | 10  | RDR2-sensitive |
| GTTGCGGCTGGAGTAGAGACCGGT  | 1  | 33  | RDR2-sensitive |
| GTTGCGGGACTGCGGCAGCCTCAC  | 0  | 50  | RDR2-sensitive |
| GTTGCGGGAGATAGAGGACGACTG  | 0  | 9   | RDR2-sensitive |
| GTTGCGGGTCAGGACGAGATGGAA  | 0  | 10  | RDR2-sensitive |
| GTTGCTACAAGTAGGACTGGGCGT  | 0  | 35  | RDR2-sensitive |
| GTTGCTACTGCGTACCGTCCGGAC  | 0  | 9   | RDR2-sensitive |
| GTTGCTAGGAGCTTCGACGTCTGA  | 0  | 15  | RDR2-sensitive |
| GTTGCTAGTAGAACGGACGGACGG  | 2  | 82  | RDR2-sensitive |
| GTTGCTCCTGCTAGCTAGTCGGTG  | 0  | 9   | RDR2-sensitive |
| GTTGCTCGGACAGCGTCGGCAACC  | 26 | 1   | RDR2-resistant |
| GTTGCTCGGACTCTGACCACGGAG  | 0  | 52  | RDR2-sensitive |
| GTTGCTCGGATCTAGACGGTTGTC  | 0  | 11  | RDR2-sensitive |
| GTTGCTCGGCAGTATTTATTCGGC  | 0  | 9   | RDR2-sensitive |
| GTTGCTGACTGTAGCTCGATGGTT  | 0  | 9   | RDR2-sensitive |
| GTTGCTGATCGTAGCTCGATGGTT  | 0  | 10  | RDR2-sensitive |
| GTTGCTGCAGGGAGTAGATGACGT  | 0  | 12  | RDR2-sensitive |
| GTTGCTGGAAGGAGTAGAGGACGT  | 1  | 29  | RDR2-sensitive |
| GTTGCTGGACGCCGTAGCGGACGT  | 0  | 22  | RDR2-sensitive |
| GTTGCTGGAGAGAGTAGAGGACGT  | 0  | 172 | RDR2-sensitive |
| GTTGCTGGAGAGAGTAGATGACGT  | 0  | 11  | RDR2-sensitive |
| GTTGCTGGAGAGCGTAGAAGACCG  | 0  | 45  | RDR2-sensitive |
| GTTGCTGGAGAGCGTAGAGGACCA  | 0  | 11  | RDR2-sensitive |
| GTTGCTGGAGAGCGTAGAGGACCG  | 2  | 68  | RDR2-sensitive |
| GTTGCTGGAGAGCGTAGAGGACTG  | 0  | 11  | RDR2-sensitive |

|                           |    |     |                |
|---------------------------|----|-----|----------------|
| GTTGCTGGAGAGCGTAGATGACAG  | 0  | 9   | RDR2-sensitive |
| GTTGCTGGAGAGTGTAGAAGACCG  | 0  | 41  | RDR2-sensitive |
| GTTGCTGGAGCGAGTAGAGGACGT  | 0  | 23  | RDR2-sensitive |
| GTTGCTGGAGCGCTACCGGACGGT  | 0  | 23  | RDR2-sensitive |
| GTTGCTGGAGGAAATAGAGGACGT  | 0  | 28  | RDR2-sensitive |
| GTTGCTGGAGGAAGTAGAGGACGT  | 3  | 22  | RDR2-sensitive |
| GTTGCTGGAGGACATGGAAGACCG  | 0  | 28  | RDR2-sensitive |
| GTTGCTGGAGGCATAGAAGAGCAT  | 0  | 9   | RDR2-sensitive |
| GTTGCTGGAGGGAATAGAGGACGT  | 0  | 15  | RDR2-sensitive |
| GTTGCTGGAGGGAGAAGATGACGT  | 0  | 20  | RDR2-sensitive |
| GTTGCTGGAGGGAGTAGAGGACAT  | 4  | 47  | RDR2-sensitive |
| GTTGCTGGAGGGAGTAGAGGACGC  | 0  | 14  | RDR2-sensitive |
| GTTGCTGGAGGGAGTAGAGGACGG  | 0  | 24  | RDR2-sensitive |
| GTTGCTGGAGGGAGTAGAGGACGT  | 27 | 686 | RDR2-sensitive |
| GTTGCTGGAGGGAGTAGAGGGCGT  | 1  | 21  | RDR2-sensitive |
| GTTGCTGGAGGGAGTAGATGACGT  | 1  | 74  | RDR2-sensitive |
| GTTGCTGGAGGGCTAGAGGACGTC  | 0  | 16  | RDR2-sensitive |
| GTTGCTGGAGGTAGTAGAGGACGT  | 0  | 15  | RDR2-sensitive |
| GTTGCTGGAGTGAGTAGAGAACGT  | 0  | 10  | RDR2-sensitive |
| GTTGCTGGAGTGAGTAGAGGACGT  | 4  | 21  | RDR2-sensitive |
| GTTGCTGGAGTGAGTAGATGACGT  | 1  | 40  | RDR2-sensitive |
| GTTGCTGGATAGAGTAGAGGACGT  | 0  | 27  | RDR2-sensitive |
| GTTGCTGGATGCAGTAGAGGACGT  | 0  | 60  | RDR2-sensitive |
| GTTGCTGGATGGAGTAGAGGACAT  | 0  | 40  | RDR2-sensitive |
| GTTGCTGGGCGCGTTGAGGACGTG  | 3  | 141 | RDR2-sensitive |
| GTTGCTGGGCGCGTTGGGGACGTG  | 2  | 18  | RDR2-sensitive |
| GTTGCTGGGCGTGTTGAGGACGTG  | 0  | 11  | RDR2-sensitive |
| GTTGCTGGGGCTGTACCGGGCGTC  | 0  | 9   | RDR2-sensitive |
| GTTGCTGTAGAAGTGAGGTAGCCA  | 0  | 17  | RDR2-sensitive |
| GTTGCTGTAGCGAGTAGAGGACGT  | 2  | 193 | RDR2-sensitive |
| GTTGCTGTGGATCCGATCGGCACC  | 0  | 22  | RDR2-sensitive |
| GTTGCTGTTGGAGCCATACCGGAC  | 0  | 9   | RDR2-sensitive |
| GTTGCTTAGACTGTACAACGGCTC  | 0  | 16  | RDR2-sensitive |
| GTTGCTTCGGTTCCTGTCAGGCAT  | 1  | 29  | RDR2-sensitive |
| GTTGCTTGATACGACGACGCTGG   | 0  | 9   | RDR2-sensitive |
| GTTGCTTGACGGACTTGGTCGGT   | 0  | 13  | RDR2-sensitive |
| GTTGGAACCGCTCCGAACCTCGGC  | 0  | 10  | RDR2-sensitive |
| GTTGGAACCTGACCGGGAAGACCGC | 0  | 14  | RDR2-sensitive |
| GTTGGAAGGCTGCAGTCGCATGGC  | 0  | 25  | RDR2-sensitive |
| GTTGGAATTGGCTGGTATGATGGC  | 0  | 13  | RDR2-sensitive |
| GTTGGAATTGTAGTAGGCCGGGCGT | 0  | 13  | RDR2-sensitive |
| GTTGGAACTCGGCATAATCCTGC   | 0  | 16  | RDR2-sensitive |
| GTTGGACCGGCGTACTATCTCGCG  | 1  | 16  | RDR2-sensitive |
| GTTGGACGGAGAGAGGAGATCGTC  | 0  | 14  | RDR2-sensitive |
| GTTGGACGGGCCGGCTCGGTACAG  | 0  | 32  | RDR2-sensitive |
| GTTGGAGCTCTGACAGGTGGGGCC  | 0  | 12  | RDR2-sensitive |
| GTTGGAGGACATCGGAGAACGGAT  | 0  | 9   | RDR2-sensitive |
| GTTGGAGGACGACTAGAAACGGAT  | 0  | 10  | RDR2-sensitive |
| GTTGGAGGCTTCCAGGACGGTGAG  | 0  | 15  | RDR2-sensitive |

|                           |    |     |                |
|---------------------------|----|-----|----------------|
| GTTGGAGGCTTTCAGGACGGTGAG  | 0  | 31  | RDR2-sensitive |
| GTTGGAGGGAGTAGAGGACGTCCT  | 0  | 9   | RDR2-sensitive |
| GTTGGAGGGGGTAGAGGACGTCCT  | 0  | 11  | RDR2-sensitive |
| GTTGGAGGGGTAGAGGACGTCCTC  | 1  | 17  | RDR2-sensitive |
| GTTGGAGTTGGACGCGACGCGGAC  | 0  | 27  | RDR2-sensitive |
| GTTGGAGTTGTTCCGGTAACGGGT  | 0  | 9   | RDR2-sensitive |
| GTTGGATATTGGATGGATGGGCTG  | 0  | 10  | RDR2-sensitive |
| GTTGGATCTTATTTTCGTCGTCGG  | 0  | 10  | RDR2-sensitive |
| GTTGGATGCACGGTATCGGCTCAG  | 0  | 11  | RDR2-sensitive |
| GTTGGATGCCGGTTGGACGGTCTG  | 0  | 10  | RDR2-sensitive |
| GTTGGATGGAAAATGGACGGCCAG  | 2  | 21  | RDR2-sensitive |
| GTTGGATGGACCAGGTGGGATGGA  | 0  | 26  | RDR2-sensitive |
| GTTGGATGGGAGACGGACAACCAG  | 0  | 18  | RDR2-sensitive |
| GTTGGATGGGAGACGGACGACCAG  | 0  | 16  | RDR2-sensitive |
| GTTGGATGGTCGAGGTGGGATGGA  | 0  | 10  | RDR2-sensitive |
| GTTGGATGTGGAGGGTGTGGTCTG  | 4  | 18  | RDR2-sensitive |
| GTTGGATTCCGACCGTTGGAGCTT  | 0  | 9   | RDR2-sensitive |
| GTTGGATTGAAGGGCAGGCTCCAA  | 0  | 10  | RDR2-sensitive |
| GTTGGCACAACGGACGTCGTGGC   | 1  | 30  | RDR2-sensitive |
| GTTGGCACTCGGCAAAGACTGACG  | 1  | 40  | RDR2-sensitive |
| GTTGGCACTCGGCAAAGACTTCAC  | 0  | 15  | RDR2-sensitive |
| GTTGGCACTGGCGGAAACGCGGAG  | 0  | 13  | RDR2-sensitive |
| GTTGGCCCAATTGTAGTCGGACGG  | 0  | 10  | RDR2-sensitive |
| GTTGGCCTGTTGGACCCCGGCAC   | 0  | 11  | RDR2-sensitive |
| GTTGGCTAGGTAGGTGTGAGACGT  | 0  | 16  | RDR2-sensitive |
| GTTGGCTCGGACCCTCTACGGCTC  | 0  | 14  | RDR2-sensitive |
| GTTGGCTCTCGGCAAAGACTGACG  | 37 | 261 | RDR2-sensitive |
| GTTGGCTTGGGCAGTAGGAAGGTA  | 0  | 106 | RDR2-sensitive |
| GTTGGGACCATGCTTCGTCGCCGA  | 1  | 31  | RDR2-sensitive |
| GTTGGGACTATGCTTCGTCGCCGA  | 0  | 12  | RDR2-sensitive |
| GTTGGGAGGCTGTCTGTTGATGG   | 0  | 15  | RDR2-sensitive |
| GTTGGGATTGTGCGTAGGAGCGGT  | 59 | 0   | RDR2-resistant |
| GTTGGGCCGTTGCAGAGTGGACAG  | 0  | 10  | RDR2-sensitive |
| GTTGGGCGGAGACCGGACGGAAGA  | 0  | 12  | RDR2-sensitive |
| GTTGGGCTGCTCCATACGGTAAAG  | 0  | 19  | RDR2-sensitive |
| GTTGGGGACGGCCATGAACCTCGC  | 2  | 19  | RDR2-sensitive |
| GTTGGGGCGAAGGCGAAGACGCTA  | 2  | 45  | RDR2-sensitive |
| GTTGGGGCTGCGCAGATCCGGCGA  | 0  | 13  | RDR2-sensitive |
| GTTGGGGCTGCGTAGATCCGGCGA  | 0  | 13  | RDR2-sensitive |
| GTTGGGGCTTGTACTGTTAGGCAT  | 0  | 12  | RDR2-sensitive |
| GTTGGGTCTTGA CTGACGGATCAG | 4  | 32  | RDR2-sensitive |
| GTTGGGTGGATACAGGAGATCGCT  | 0  | 13  | RDR2-sensitive |
| GTTGGGTTCCGACGGTGAAGGAGAA | 0  | 14  | RDR2-sensitive |
| GTTGGGTTGCTGGGAAGGGAGCGG  | 1  | 21  | RDR2-sensitive |
| GTTGGGTTGGTCGGATTGAGTGGC  | 0  | 12  | RDR2-sensitive |
| GTTGGGTTTGTCCGGTCCGGCGGC  | 0  | 14  | RDR2-sensitive |
| GTTGGTAATCGGCTGAGTTATGGC  | 0  | 10  | RDR2-sensitive |
| GTTGGTACGGGCAGAACGAGCGTA  | 0  | 33  | RDR2-sensitive |
| GTTGGTCGCTATAGATATCGTCGG  | 0  | 13  | RDR2-sensitive |

|                            |     |    |                |
|----------------------------|-----|----|----------------|
| GTTGGTCTCCTGGGCACGGATAGG   | 31  | 6  | RDR2-resistant |
| GTTGGTCTCGAGTGGATAAGGCAT   | 0   | 14 | RDR2-sensitive |
| GTTGGTCTGTTGTAGAGTGGGCGG   | 0   | 12 | RDR2-sensitive |
| GTTGGTCTTGGACAAGGCGTGGTT   | 0   | 20 | RDR2-sensitive |
| GTTGGTGGAGCGATTTGTCTGGTT   | 160 | 6  | RDR2-resistant |
| GTTGGTGGAGGCCGCGAGCTGGT    | 32  | 2  | RDR2-resistant |
| GTTGGTGGCGGCTTCGTGTGAATG   | 66  | 2  | RDR2-resistant |
| GTTGGTTGTA CTTGAGTTGATGTA  | 4   | 20 | RDR2-sensitive |
| GTTGGTTGTGTGGTGTGGATGGCT   | 0   | 28 | RDR2-sensitive |
| GTTGGTTTTGGCTACTCAGGCATC   | 22  | 0  | RDR2-resistant |
| GTTGTACGGCGTGGTAGACGGACT   | 0   | 16 | RDR2-sensitive |
| GTTGTACGGCGTGGTAGACGGGCT   | 3   | 77 | RDR2-sensitive |
| GTTGTAGA ACTTAAATCTTGCAA   | 17  | 1  | RDR2-resistant |
| GTTGTAGACCTCCGCAAACACGGT   | 0   | 13 | RDR2-sensitive |
| GTTGTAGGACTGCAGGGAGGACAG   | 0   | 17 | RDR2-sensitive |
| GTTGTAGGATCTCGAAGACGACAG   | 0   | 16 | RDR2-sensitive |
| GTTGTAGGCCCTGCACTCGGTAC    | 0   | 17 | RDR2-sensitive |
| GTTGTAGGGAGTAGAGGACAACAT   | 0   | 10 | RDR2-sensitive |
| GTTGTAGTGGGAAGCGGAGGCCTG   | 0   | 17 | RDR2-sensitive |
| GTTGTATACTACTGAACTGACGTT   | 0   | 13 | RDR2-sensitive |
| GTTGTATCATTTCTCGGCACACT    | 0   | 10 | RDR2-sensitive |
| GTTGTATCCTGAGTAGAGCGACGG   | 0   | 13 | RDR2-sensitive |
| GTTGTATCGCACGAGACAGGCTAG   | 0   | 71 | RDR2-sensitive |
| GTTGTATCTAGGATGCCGGACATG   | 0   | 9  | RDR2-sensitive |
| GTTGTCAACTGTAGATGGCTTGGC   | 0   | 18 | RDR2-sensitive |
| GTTGTCACTGTTGACGATCGCTCC   | 22  | 2  | RDR2-resistant |
| GTTGT CAGGCTGTGCTAGCACGGG  | 0   | 14 | RDR2-sensitive |
| GTTGTCCAGCATGTAGACGTGCAG   | 0   | 33 | RDR2-sensitive |
| GTTGT CGACCCTGCTGATTCCGGC  | 2   | 24 | RDR2-sensitive |
| GTTGT CGACCCTGTTGATTCCGGC  | 0   | 22 | RDR2-sensitive |
| GTTGT CGACCCTGGCCGATTGTCGT | 0   | 13 | RDR2-sensitive |
| GTTGT CGACGGTAGACGCACGGTG  | 1   | 12 | RDR2-sensitive |
| GTTGT CGACTGGGAGTAGAGATGG  | 0   | 13 | RDR2-sensitive |
| GTTGT CGACTGTATGTTCCGGCTAA | 0   | 14 | RDR2-sensitive |
| GTTGT CGATGGAAGACCAGACGGT  | 0   | 12 | RDR2-sensitive |
| GTTGT CGATGTACAGTTCGCCGAG  | 0   | 13 | RDR2-sensitive |
| GTTGT CGATTCCACTGTCGTCGCT  | 0   | 12 | RDR2-sensitive |
| GTTGT CGCAGTAGACGAGGGGGGC  | 1   | 16 | RDR2-sensitive |
| GTTGT CGCAGTAGACTAGGGTGGC  | 0   | 13 | RDR2-sensitive |
| GTTGT CGCGTAGGACAGTTCGGCT  | 0   | 20 | RDR2-sensitive |
| GTTGT CGGGCTTGCTGGACGGCCT  | 0   | 21 | RDR2-sensitive |
| GTTGT CGGTCTGGGCCGAGGTCGG  | 1   | 12 | RDR2-sensitive |
| GTTGT CGTTACCAGAAGCAGCCTC  | 0   | 9  | RDR2-sensitive |
| GTTGTCTGAATTACTTGCTGAAGA   | 21  | 0  | RDR2-resistant |
| GTTGTCTGCGGAAGCTTGACGGT    | 0   | 18 | RDR2-sensitive |
| GTTGTCTGGACGTGTGAAGCGCAC   | 0   | 9  | RDR2-sensitive |
| GTTGTCTGGGCTGTTTTGTGCATT   | 1   | 12 | RDR2-sensitive |
| GTTGTCTGTCTTGTAGAAGGGGTA   | 2   | 19 | RDR2-sensitive |
| GTTGTGAGTCAAGGCTGAGACGGG   | 0   | 9  | RDR2-sensitive |

|                           |     |     |                |
|---------------------------|-----|-----|----------------|
| GTTGTGCCGCTGTAGATTAGACGG  | 0   | 17  | RDR2-sensitive |
| GTTGTGGAACCACGGCGATGACAT  | 0   | 16  | RDR2-sensitive |
| GTTGTGGAAGTGCAGTGGAGCGGA  | 0   | 17  | RDR2-sensitive |
| GTTGTGGAAGGTAGAGGGCGACTG  | 0   | 9   | RDR2-sensitive |
| GTTGTGGACGGCGACAGAGTGGAC  | 0   | 15  | RDR2-sensitive |
| GTTGTGGGACAGCTAGGACGGGAT  | 2   | 83  | RDR2-sensitive |
| GTTGTGGGGCTATGGTAGAGGCAA  | 0   | 21  | RDR2-sensitive |
| GTTGTGTCTGTGCTCTCATCGGCT  | 0   | 12  | RDR2-sensitive |
| GTTGTGTGTTTGGCGATCTTGTA   | 21  | 0   | RDR2-resistant |
| GTTGTGTTCTGTATGCGTTGGCAT  | 378 | 20  | RDR2-resistant |
| GTTGTGTTGGGCTTAGATGGTTTC  | 0   | 13  | RDR2-sensitive |
| GTTGTTATCGTGACAGGACGGCAA  | 0   | 9   | RDR2-sensitive |
| GTTGTTATGGACTGTTTCGTCAGGC | 1   | 86  | RDR2-sensitive |
| GTTGTTCAATCTGGATCGTCCATC  | 3   | 26  | RDR2-sensitive |
| GTTGTTCCGCGGGCGTAGGGAGGC  | 0   | 10  | RDR2-sensitive |
| GTTGTTCCGATGATCGCATGCAAT  | 43  | 1   | RDR2-resistant |
| GTTGTTCCGGCCAATGGTACGGCT  | 1   | 63  | RDR2-sensitive |
| GTTGTTGAAGTGAGTAGAGGACGT  | 0   | 10  | RDR2-sensitive |
| GTTGTTGACTGTAGCTCGATGGTT  | 0   | 16  | RDR2-sensitive |
| GTTGTTGAGCTCTTCCATGCATGGC | 21  | 2   | RDR2-resistant |
| GTTGTTGATGTAGTGAACCGGCTT  | 1   | 22  | RDR2-sensitive |
| GTTGTTGATTGTAGCTTGATGGTT  | 0   | 13  | RDR2-sensitive |
| GTTGTTGCTGGTACACGAGGGCGT  | 0   | 9   | RDR2-sensitive |
| GTTGTTGGAATGAGTAGAGGACGT  | 0   | 54  | RDR2-sensitive |
| GTTGTTGGAGAGGTAGCGGATGTC  | 0   | 10  | RDR2-sensitive |
| GTTGTTGGAGGCTTCCAGAACGGT  | 0   | 9   | RDR2-sensitive |
| GTTGTTGGAGGCTTCCAGGACGGT  | 0   | 37  | RDR2-sensitive |
| GTTGTTGGAGGCTTTCAGGACGGT  | 0   | 31  | RDR2-sensitive |
| GTTGTTGGAGGGAGTAGAGGACGT  | 0   | 50  | RDR2-sensitive |
| GTTGTTGGAGGGATAGAGGACGTC  | 0   | 39  | RDR2-sensitive |
| GTTGTTGGAGGGGTAGAGGACGT   | 0   | 42  | RDR2-sensitive |
| GTTGTTGGAGGGGTAGAGGACGTC  | 7   | 405 | RDR2-sensitive |
| GTTGTTGGAGTGAGTAGACGACGT  | 0   | 32  | RDR2-sensitive |
| GTTGTTGGAGTGAGTAGAGGACGT  | 0   | 48  | RDR2-sensitive |
| GTTGTTGGCTATAGATGTACACGG  | 0   | 15  | RDR2-sensitive |
| GTTGTTGGGACCATGCTTCGTCCG  | 0   | 11  | RDR2-sensitive |
| GTTGTTGGGACTAGGGGTGGGCGT  | 0   | 9   | RDR2-sensitive |
| GTTGTTGGGCGGAGACCGGACGGA  | 0   | 134 | RDR2-sensitive |
| GTTGTTGGGCTCTCACAGATGGGG  | 0   | 9   | RDR2-sensitive |
| GTTGTTGGGTACCTGGGAACACGG  | 0   | 19  | RDR2-sensitive |
| GTTGTTGTAGGCTCTGGTGGTCGG  | 0   | 10  | RDR2-sensitive |
| GTTGTTGTGTGGCTATAGACGGTA  | 46  | 2   | RDR2-resistant |
| GTTGTTGTTGGACGCATTGCGCAC  | 0   | 17  | RDR2-sensitive |
| GTTGTTTCTCTGCAGGACGATGGT  | 1   | 59  | RDR2-sensitive |
| GTTGTTTGAACCTTAGTTGCATG   | 16  | 0   | RDR2-resistant |
| GTTGTTTGGTTACCTGGACGGAGA  | 1   | 30  | RDR2-sensitive |
| GTTGTTTTGTTTATTGTTGGT     | 20  | 0   | RDR2-resistant |
| GTTTAAGACTGTTATGTTGACGGG  | 0   | 14  | RDR2-sensitive |
| GTTTAATCTTAAGGATGGTGCCTC  | 21  | 0   | RDR2-resistant |

|                           |    |     |                |
|---------------------------|----|-----|----------------|
| GTTTACTGAGAGCAGGACGACGCT  | 0  | 15  | RDR2-sensitive |
| GTTTACTGTAGTGACGGCCTGTC   | 1  | 14  | RDR2-sensitive |
| GTTTAGAGGACGCTGCTGGAGAGA  | 0  | 14  | RDR2-sensitive |
| GTTTAGAGGACGCTGCTGGAGAGC  | 1  | 33  | RDR2-sensitive |
| GTTTAGAGGACGCTGCTGGAGGAC  | 0  | 32  | RDR2-sensitive |
| GTTTAGAGGACGCTGCTGGAGGGC  | 7  | 31  | RDR2-sensitive |
| GTTTAGAGGACGTTGCTGGAGGGA  | 10 | 61  | RDR2-sensitive |
| GTTTAGAGGACGTTGCTGGAGGGG  | 0  | 12  | RDR2-sensitive |
| GTTTAGATCGTGCCGACGGTGCTT  | 42 | 2   | RDR2-resistant |
| GTTTAGGAGGGAGCTCGGCCGCAC  | 0  | 27  | RDR2-sensitive |
| GTTTAGGCTAATGTGGACGGGCAA  | 0  | 14  | RDR2-sensitive |
| GTTTAGGGCGTGTGTTGGACGGA   | 0  | 12  | RDR2-sensitive |
| GTTTAGGTAGAATGATTGTGGCAA  | 0  | 12  | RDR2-sensitive |
| GTTTAGGTTGCTGTGGGACAGGC   | 0  | 9   | RDR2-sensitive |
| GTTTAGTCAGGCTGATGCACGGGA  | 0  | 23  | RDR2-sensitive |
| GTTTATAGCTACGATTGTTGGTC   | 51 | 0   | RDR2-resistant |
| GTTTATCGGGACGGATACAGGTAT  | 0  | 13  | RDR2-sensitive |
| GTTTATGGGAGGCTGTAGTGAGGC  | 0  | 24  | RDR2-sensitive |
| GTTTATGGTCGATTTAGGGGAGGA  | 15 | 0   | RDR2-resistant |
| GTTTCAACGGTCGTCATACGTCAT  | 0  | 10  | RDR2-sensitive |
| GTTTCAACGGTCGTCATGCGTCAT  | 3  | 58  | RDR2-sensitive |
| GTTTCCGGGCTGTCCGGCCGGCAC  | 0  | 10  | RDR2-sensitive |
| GTTTCCTGGATTGTTGTTGGGTT   | 20 | 2   | RDR2-resistant |
| GTTTCGACGCTCTGGGTGGCCGGT  | 2  | 34  | RDR2-sensitive |
| GTTTCGCGCGGGCGTTCGGTAGAG  | 0  | 13  | RDR2-sensitive |
| GTTTCGCTGGGACAGTGGACGGCC  | 0  | 13  | RDR2-sensitive |
| GTTTCGGACCAGGCTTCATTCCCC  | 25 | 1   | RDR2-resistant |
| GTTTCGGACGTACGTGTGGATGCA  | 0  | 15  | RDR2-sensitive |
| GTTTCGGGCAACTCGGAAACGGAA  | 0  | 12  | RDR2-sensitive |
| GTTTCGGGCCAGTAGAGCACGGAA  | 0  | 15  | RDR2-sensitive |
| GTTTCGGGTGTAGACTGGGGATGG  | 0  | 10  | RDR2-sensitive |
| GTTTCGGTTCTGCGGTGTTGGCAT  | 0  | 12  | RDR2-sensitive |
| GTTTCGTAATGTGATCGTTGAGAT  | 0  | 13  | RDR2-sensitive |
| GTTTCGTCACTCTCAATGGCCGGT  | 0  | 12  | RDR2-sensitive |
| GTTTCGTTGATTGTTGTCGACATT  | 22 | 0   | RDR2-resistant |
| GTTTCTACCTGTAGGACCTTCGGC  | 0  | 30  | RDR2-sensitive |
| GTTTCTAGTTGGGCGCATCAGACG  | 16 | 0   | RDR2-resistant |
| GTTTCTCCCTGCAGGACCTTCGGC  | 4  | 35  | RDR2-sensitive |
| GTTTCTCTGCGGACGGCGATTTCCG | 0  | 11  | RDR2-sensitive |
| GTTTCTGCCGGATTGGTGGGTCGG  | 2  | 16  | RDR2-sensitive |
| GTTTCTGCTGGATTGGTGGGTCGG  | 0  | 17  | RDR2-sensitive |
| GTTTCTGGCTGGCTGTAACGGTAG  | 1  | 26  | RDR2-sensitive |
| GTTTCTGTCCGATTGGTGGGTCGG  | 8  | 61  | RDR2-sensitive |
| GTTTCTGTGGAGCCAGGCTGAAAG  | 0  | 9   | RDR2-sensitive |
| GTTTCTGTGGAGCCAGGCTGAGAG  | 0  | 64  | RDR2-sensitive |
| GTTTCTTACTGGGACGGTAGCGGA  | 1  | 24  | RDR2-sensitive |
| GTTTCTTCCCTGCAGGACCTTCGGC | 6  | 118 | RDR2-sensitive |
| GTTTCTTCCCTGTAGGACCTTCGGC | 0  | 20  | RDR2-sensitive |
| GTTTCTTCCCTGTGGGACCTTCGGC | 1  | 65  | RDR2-sensitive |

|                           |    |     |                |
|---------------------------|----|-----|----------------|
| GTTTCTTCTTACAGGATCTTCGGC  | 3  | 44  | RDR2-sensitive |
| GTTTCTTCTTGTAGGACCTTCGGC  | 2  | 34  | RDR2-sensitive |
| GTTTCTTTCTGCAGGAACCTTCGGC | 0  | 11  | RDR2-sensitive |
| GTTTCTTTCTGCAGGACCTTCGGC  | 4  | 68  | RDR2-sensitive |
| GTTTCTTTCTTTAGGATCTTCGGC  | 0  | 19  | RDR2-sensitive |
| GTTTCTTTTGTAGTCGCTGGAT    | 68 | 2   | RDR2-resistant |
| GTTTGAACGTGGCACGGCATGAT   | 0  | 11  | RDR2-sensitive |
| GTTTGAATCGCGGAACGATGTCAT  | 0  | 11  | RDR2-sensitive |
| GTTTGAATCGCGGAACGATGTCGT  | 0  | 25  | RDR2-sensitive |
| GTTTGAATTTCTGGGCCGGCCACAG | 0  | 12  | RDR2-sensitive |
| GTTTGAATTTCTGGGTCGTATCGGA | 0  | 16  | RDR2-sensitive |
| GTTTGACGATGGACAGCGCGGTGC  | 0  | 9   | RDR2-sensitive |
| GTTTGACTGCCTCAGCATCGTCGT  | 0  | 11  | RDR2-sensitive |
| GTTTGAGCGGATGCAGGCTGACGG  | 0  | 11  | RDR2-sensitive |
| GTTTGAGTGGGTAGAGTTTCGGAA  | 0  | 14  | RDR2-sensitive |
| GTTTGATGGTACGTGCTACTCGGA  | 27 | 2   | RDR2-resistant |
| GTTTGCAACCGCGGATGTGATCGT  | 0  | 9   | RDR2-sensitive |
| GTTTGCACGGACTGCTGAAGATGA  | 0  | 15  | RDR2-sensitive |
| GTTTGCAGATGAACGGACCTGGAT  | 0  | 64  | RDR2-sensitive |
| GTTTGCAGATGGACGGACCTGGAT  | 0  | 36  | RDR2-sensitive |
| GTTTGCATAGTAGGACACTCGGCA  | 0  | 17  | RDR2-sensitive |
| GTTTGCCGACTGCAGGAGACAAGT  | 1  | 12  | RDR2-sensitive |
| GTTTGCGACGACCGTTGGATGGAA  | 0  | 15  | RDR2-sensitive |
| GTTTGCGACTCGGACAGGCCTAGG  | 0  | 10  | RDR2-sensitive |
| GTTTGCGACTGAGAGCCTAGGCAG  | 2  | 90  | RDR2-sensitive |
| GTTTGCGGTTGGAGAGGAAGGATC  | 21 | 2   | RDR2-resistant |
| GTTTGCTCGACAAGGACTTGGCAG  | 0  | 12  | RDR2-sensitive |
| GTTTGAATCTCTGACGGGCTGGT   | 1  | 18  | RDR2-sensitive |
| GTTTGGACCGGGCTAAATTCGTGC  | 0  | 51  | RDR2-sensitive |
| GTTTGGACCGGGCTAGATTCGTGC  | 0  | 18  | RDR2-sensitive |
| GTTTGGACTGACACCTACGGCGCC  | 2  | 113 | RDR2-sensitive |
| GTTTGGACTGAGGTTGCGGCCCAT  | 0  | 17  | RDR2-sensitive |
| GTTTGGACTTCCAGCAGCTCGGCT  | 0  | 12  | RDR2-sensitive |
| GTTTGGACTTTCGGCCGGGGGTGC  | 0  | 10  | RDR2-sensitive |
| GTTTGGAGAGCGTCCGAGCCGGCT  | 0  | 14  | RDR2-sensitive |
| GTTTGGATGTCTGGCTGTCACCGG  | 0  | 19  | RDR2-sensitive |
| GTTTGGCAAGCAGAACGGAACCGC  | 2  | 18  | RDR2-sensitive |
| GTTTGGCAATGGACTGGACAGGCA  | 0  | 11  | RDR2-sensitive |
| GTTTGGCAGTTGGCTGTGGTCCGGC | 1  | 29  | RDR2-sensitive |
| GTTTGGCTACTCTGTTGGATGGAA  | 0  | 11  | RDR2-sensitive |
| GTTTGGGACTGTTAATCTACCGGC  | 1  | 15  | RDR2-sensitive |
| GTTTGGGATCTCTGACGGGCTGGT  | 8  | 31  | RDR2-sensitive |
| GTTTGGGCCTGAGACGCGGCACGG  | 0  | 16  | RDR2-sensitive |
| GTTTGGGCCAAAGCTAGGCGGCCGA | 52 | 3   | RDR2-resistant |
| GTTTGGGTCCGACGGCCAGGCACGT | 0  | 67  | RDR2-sensitive |
| GTTTGGTAAGCTGGAACGGAGCGG  | 3  | 22  | RDR2-sensitive |
| GTTTGGTAAGTTGGAACGGAGCGG  | 0  | 9   | RDR2-sensitive |
| GTTTGGTAATCTGGAACGGAGCGG  | 9  | 96  | RDR2-sensitive |
| GTTTGGTACTGTTAATCTACCGGC  | 0  | 13  | RDR2-sensitive |

|                           |    |     |                |
|---------------------------|----|-----|----------------|
| GTTTGGTATTGTAGAACGGAGCGG  | 0  | 15  | RDR2-sensitive |
| GTTTGGTCGGAGGGATGAGATGGT  | 1  | 12  | RDR2-sensitive |
| GTTTGGTCTTGTTCGTCGTCGG    | 0  | 10  | RDR2-sensitive |
| GTTTGGTGGCTCTGTACATACGGG  | 0  | 20  | RDR2-sensitive |
| GTTTGGTGTGTAGAGCAAGGGTGA  | 0  | 13  | RDR2-sensitive |
| GTTTGGTTAGAGGCATTGGACGGT  | 0  | 12  | RDR2-sensitive |
| GTTTGGTTGCAATGACAGGACGGG  | 5  | 26  | RDR2-sensitive |
| GTTTGGTTGCAGAGTGAACGGAAC  | 14 | 117 | RDR2-sensitive |
| GTTTGGTTGCAGAGTGAACGGAAT  | 0  | 9   | RDR2-sensitive |
| GTTTGGTTGCTAGCAGTCTCGGCG  | 2  | 33  | RDR2-sensitive |
| GTTTGGTTGCTGGAAAGGGAGCGG  | 0  | 25  | RDR2-sensitive |
| GTTTGGTTGGACGTACAAGCACGG  | 0  | 10  | RDR2-sensitive |
| GTTTGGTTGGCTGCAGAGCAGGAG  | 1  | 44  | RDR2-sensitive |
| GTTTGGTTGGCTGCATGCATATTT  | 0  | 10  | RDR2-sensitive |
| GTTTGGTTTATAGAATGTGGTAGG  | 22 | 0   | RDR2-resistant |
| GTTTGTAAACGGTTGTGTTGAAGGA | 53 | 2   | RDR2-resistant |
| GTTTGTAGGACAGCATATTCACAT  | 0  | 13  | RDR2-sensitive |
| GTTTGTATTGTGGCGAGTAGAAGA  | 0  | 12  | RDR2-sensitive |
| GTTTGTGCGAGTGTTCCTAAGGCTT | 1  | 13  | RDR2-sensitive |
| GTTTGTGCGGACGGATACGGGTAT  | 0  | 11  | RDR2-sensitive |
| GTTTGTCTGCTGTGCACGTGCGTT  | 0  | 9   | RDR2-sensitive |
| GTTTGTGACTCTGTACCGAGCCGG  | 1  | 71  | RDR2-sensitive |
| GTTTGTGCCGATTGGTGGGTCGG   | 3  | 36  | RDR2-sensitive |
| GTTTGTGCTGGACGTGCGAGCGGT  | 0  | 11  | RDR2-sensitive |
| GTTTGTGTCGGATTGGTGGGTCGG  | 8  | 118 | RDR2-sensitive |
| GTTTGTCTGTAGATCCGTGCGGC   | 2  | 30  | RDR2-sensitive |
| GTTTGTGGCTAGATTTGCGGAAT   | 30 | 136 | RDR2-sensitive |
| GTTTGTGGGCTGGATCGAGGTAT   | 0  | 28  | RDR2-sensitive |
| GTTTGTAAATGTAAGAAGTAGGC   | 15 | 0   | RDR2-resistant |
| GTTTGTAAAGCTGGAGAGGAGGGT  | 0  | 9   | RDR2-sensitive |
| GTTTGTAAAGTGGTACGTGCTACT  | 88 | 3   | RDR2-resistant |
| GTTTGTAAAGGCTGAGACGCGGC   | 0  | 37  | RDR2-sensitive |
| GTTTGTAAAGTGACAGGAACGTCGT | 0  | 15  | RDR2-sensitive |
| GTTTAAACGTGGGGCTGAGAGGGC  | 0  | 9   | RDR2-sensitive |
| GTTTACACTTCGGGCTGGCACGG   | 0  | 25  | RDR2-sensitive |
| GTTTACATCACAGTCGGTGCACC   | 1  | 18  | RDR2-sensitive |
| GTTTAGGAGTAGGACGGTGTCCG   | 0  | 38  | RDR2-sensitive |
| GTTTAGATTGTCGCTGGATAGTGC  | 2  | 16  | RDR2-sensitive |
| GTTTAGATTGTCGTTGGATAGTGC  | 2  | 16  | RDR2-sensitive |
| GTTTATTTTCGGCACTCGGCAAA   | 0  | 9   | RDR2-sensitive |
| GTTTTCGACGGTCTCTGACGGCCA  | 1  | 40  | RDR2-sensitive |
| GTTTTCGGAATGGGTGACGTGCGA  | 0  | 42  | RDR2-sensitive |
| GTTTTCGGAATGGGTGACGTGCGG  | 5  | 77  | RDR2-sensitive |
| GTTTTCGTGGTGTAGTTGGTTATC  | 32 | 3   | RDR2-resistant |
| GTTTCTGTTAGAATTGGATGGAC   | 0  | 9   | RDR2-sensitive |
| GTTTCTTGGGCTGTGTCCGGGCA   | 0  | 15  | RDR2-sensitive |
| GTTTGCAGTGTAGTAGACTGCAT   | 1  | 100 | RDR2-sensitive |
| GTTTGGAGACGCATCTGACAGAC   | 0  | 9   | RDR2-sensitive |
| GTTTGGGACTGGTCCGTTAGGCA   | 0  | 13  | RDR2-sensitive |



|                           |     |    |                |
|---------------------------|-----|----|----------------|
| GTTTTGGTCGACAGAGCATGGCAT  | 0   | 12 | RDR2-sensitive |
| GTTTTGGTCGTGCTGGGTCAGGCT  | 1   | 16 | RDR2-sensitive |
| GTTTTGTAAGTGTAGATAATAGGCT | 0   | 41 | RDR2-sensitive |
| GTTTTGTCTGACTGTAAAAAGGGCT | 0   | 10 | RDR2-sensitive |
| GTTTTGTCTGACTGTATACACGGT  | 0   | 14 | RDR2-sensitive |
| GTTTTGTGGGCTCGACGCAGGCAT  | 0   | 12 | RDR2-sensitive |
| GTTTTTACACTTCGGGCTGGCATG  | 0   | 9  | RDR2-sensitive |
| GTTTTTATGCTGTAGTAAGGGGTA  | 0   | 23 | RDR2-sensitive |
| GTTTTTATTTGATCAGCTCGTCGT  | 0   | 15 | RDR2-sensitive |
| GTTTTTCGGGCCAGTGGAGGGCAC  | 2   | 19 | RDR2-sensitive |
| GTTTTTCTAGGCTGGTCGGACCAA  | 0   | 11 | RDR2-sensitive |
| GTTTTTGAGGACCTTCGGACCCG   | 0   | 12 | RDR2-sensitive |
| GTTTTTGAGGACCTTCGGAGGACG  | 2   | 24 | RDR2-sensitive |
| GTTTTTGCGCCTATCGGATCGGAG  | 0   | 15 | RDR2-sensitive |
| GTTTTTGTGTCGTGCTGTACCGGC  | 0   | 15 | RDR2-sensitive |
| GTTTTTTGACTGTATGTCGGGTAG  | 0   | 19 | RDR2-sensitive |
| TAAAAAGCTCGTAGTTGGACCTTG  | 45  | 5  | RDR2-resistant |
| TAAAAATTCGTTCCGGCTACGGTCT | 1   | 36 | RDR2-sensitive |
| TAAAACATACTGTAAATTTGTTAC  | 14  | 0  | RDR2-resistant |
| TAAAACGCGACGGGGCATTGTAAG  | 20  | 2  | RDR2-resistant |
| TAAAACGCTGATGGAGGATAGACT  | 17  | 0  | RDR2-resistant |
| TAAAACGATTTAGGTATTGGGAC   | 20  | 0  | RDR2-resistant |
| TAAAACGCTAGTAAGGCTTTTTACT | 147 | 13 | RDR2-resistant |
| TAAAAGCTGCTAGTTTGTTCGGAT  | 29  | 2  | RDR2-resistant |
| TAAAATAGTAAGTATTCGGATGTT  | 15  | 0  | RDR2-resistant |
| TAAAATGTAAGGATCGGATCGGGT  | 40  | 5  | RDR2-resistant |
| TAAAATTTAGAAGACGTAGTTGAA  | 0   | 12 | RDR2-sensitive |
| TAAACACAGCACTCAGTGGGCATT  | 14  | 0  | RDR2-resistant |
| TAAACCTAGGCTGTACCGGTGCAT  | 0   | 13 | RDR2-sensitive |
| TAAACTTTAGAGTGCGCTCGTCGT  | 0   | 11 | RDR2-sensitive |
| TAAACTTTGATTAGCCGGAACGAT  | 0   | 11 | RDR2-sensitive |
| TAAACTTTGATTAGCTGGAACGAT  | 4   | 25 | RDR2-sensitive |
| TAAAGAAGCAGGAGCTGGAGCTTT  | 0   | 11 | RDR2-sensitive |
| TAAAGACTTATCTCCGACGGCTTT  | 1   | 12 | RDR2-sensitive |
| TAAAGATTTTCTCTCAATCGTCA   | 14  | 0  | RDR2-resistant |
| TAAAGCCAGGGACGTGCAAGCTCT  | 0   | 13 | RDR2-sensitive |
| TAAAGCTATTTGCACTGTCGTTGT  | 0   | 9  | RDR2-sensitive |
| TAAAGGAATGTAGCTTACGTGGCT  | 16  | 0  | RDR2-resistant |
| TAAAGGACCTTAGCATTAGGCGGA  | 37  | 1  | RDR2-resistant |
| TAAAGGACTACAGAGGACAGTCAA  | 1   | 25 | RDR2-sensitive |
| TAAAGGGCTGGATCCAGGAAGCAG  | 0   | 11 | RDR2-sensitive |
| TAAAGGTAGTCGTTTAGGACATGA  | 0   | 28 | RDR2-sensitive |
| TAAAGGTTAGGGACCGACGGTCAG  | 0   | 9  | RDR2-sensitive |
| TAAAGTAGGATGAGGTGGAGGCGA  | 0   | 9  | RDR2-sensitive |
| TAAAGTTGGTTCTTTAATTTCCGT  | 19  | 0  | RDR2-resistant |
| TAAAGTTTCCTTTGTGAGTCGGC   | 14  | 0  | RDR2-resistant |
| TAAAGTTTGTAGCACGGGTGACAA  | 69  | 0  | RDR2-resistant |
| TAAATATTCTACCCGTGGGTCTGT  | 2   | 59 | RDR2-sensitive |
| TAAATATTCTATCCGTGGGTCTGT  | 1   | 14 | RDR2-sensitive |

|                             |    |    |                |
|-----------------------------|----|----|----------------|
| TAAATGATCTACCTGTAGAGATGG    | 0  | 12 | RDR2-sensitive |
| TAAATGGGTCGGCACTAAGCACGG    | 0  | 22 | RDR2-sensitive |
| TAAATTATAGTGTAGAAATAGGTT    | 45 | 0  | RDR2-resistant |
| TAAATTTTTACTCGTCAGATACCC    | 58 | 1  | RDR2-resistant |
| TAAATTTTTGGACTGTGACGTGCC    | 0  | 12 | RDR2-sensitive |
| TAAATTTTTTTGGACCGTATCGT     | 0  | 9  | RDR2-sensitive |
| TAACAACGACTTAGTATATGGCTC    | 44 | 2  | RDR2-resistant |
| TAACAACCTAAGGGCTATTGACGT    | 31 | 2  | RDR2-resistant |
| TAACAAGTTTGAATAGGTCGGTAT    | 71 | 3  | RDR2-resistant |
| TAACAGACGTGGGGCAGGTGGCGC    | 2  | 38 | RDR2-sensitive |
| TAACAGGTCTCGGGCTAAACGGGT    | 0  | 15 | RDR2-sensitive |
| TAACAGTGCTCTCTGCGAAGACGT    | 0  | 9  | RDR2-sensitive |
| TAACATCCGAGGGCTAGCAGGCGT    | 0  | 9  | RDR2-sensitive |
| TAACATTCGCCGGATGCATGTGCA    | 27 | 1  | RDR2-resistant |
| TAACCCACACCTAGAACTCGTCGT    | 5  | 40 | RDR2-sensitive |
| TAACCCATGCCTAGAACTCGTCGT    | 0  | 13 | RDR2-sensitive |
| TAACCGAATAAGACCGTAGGGACA    | 0  | 11 | RDR2-sensitive |
| TAACCGAGCAAGTTCCGTAGACGT    | 0  | 10 | RDR2-sensitive |
| TAACCGGGCTTGGACTGAGTCGGC    | 0  | 18 | RDR2-sensitive |
| TAACCGTGGATTTCGTGATTGGCGA   | 17 | 0  | RDR2-resistant |
| TAACCTGGCTCGAGTCGATGACGT    | 0  | 20 | RDR2-sensitive |
| TAACGAGCCAGCTCGAACTCGGAC    | 0  | 15 | RDR2-sensitive |
| TAACGGACTTCGGGCTAAACGGGT    | 0  | 27 | RDR2-sensitive |
| TAACGGCCTTTGGCAGAACGCGT     | 0  | 18 | RDR2-sensitive |
| TAACGGGCTGGCCCGAAGCACGGT    | 0  | 10 | RDR2-sensitive |
| TAACGGGCTGGTTCGAAACACGGC    | 0  | 16 | RDR2-sensitive |
| TAACGGGCTTAGAGCTAAACGGGC    | 0  | 16 | RDR2-sensitive |
| TAACGGGCTTAGAGGTAACGGGC     | 0  | 75 | RDR2-sensitive |
| TAACGGGCTTAGAGGTAACGGGT     | 0  | 24 | RDR2-sensitive |
| TAACGGGCTTCGGGCTAAACGGGT    | 0  | 17 | RDR2-sensitive |
| TAACGTAGAGCCTATGTCCGACGG    | 0  | 12 | RDR2-sensitive |
| TAACGTCAAATGTAGTTAGCGGA     | 53 | 3  | RDR2-resistant |
| TAACGTCTAACTGTCCGTCGGCAT    | 0  | 18 | RDR2-sensitive |
| TAACGTGGGGCTGAGAGGCGGCAT    | 0  | 13 | RDR2-sensitive |
| TAACGTTCCCGGATGCACGTGCA     | 29 | 0  | RDR2-resistant |
| TAACGTTGACACTGCGGACGGTGA    | 1  | 80 | RDR2-sensitive |
| TAACGTTGGGCTGAGAGCAGGCAT    | 2  | 32 | RDR2-sensitive |
| TAACGTTGTCGTTTGTGGCGTT      | 25 | 1  | RDR2-resistant |
| TAACTAATTGATGTCGAGCGTGAT    | 16 | 0  | RDR2-resistant |
| TAACTACGGACTIONTAGACGGTACCC | 43 | 2  | RDR2-resistant |
| TAACTAGAACTTAGGTCATCGCA     | 34 | 5  | RDR2-resistant |
| TAACTCGACCTGCAGATTTGCTAT    | 0  | 11 | RDR2-sensitive |
| TAACTCTGTGCCAGCAACCATGGC    | 0  | 12 | RDR2-sensitive |
| TAACTGGTCGGCACGGTTAGGCAC    | 1  | 14 | RDR2-sensitive |
| TAACTGTAAAATGGACGGTTGGAT    | 0  | 9  | RDR2-sensitive |
| TAACTGTAATATGGACGGTTGGAT    | 0  | 12 | RDR2-sensitive |
| TAACTGTCCACTCTGCAACGGCCT    | 0  | 9  | RDR2-sensitive |
| TAACTGTCCCAATCTGGCGCGGCT    | 2  | 14 | RDR2-sensitive |
| TAACTGTGACTGTGGCAGACTGGC    | 2  | 62 | RDR2-sensitive |

|                              |     |    |                |
|------------------------------|-----|----|----------------|
| TAAC TTATCGAGCGGATCGACGTC    | 0   | 13 | RDR2-sensitive |
| TAAC TTCTGATTGGTTGACGTCAT    | 0   | 43 | RDR2-sensitive |
| TAAC TTTT CAGTGGGACATTCCGACG | 38  | 2  | RDR2-resistant |
| TAAC TTTTGTGCTGTTGTTGATGGT   | 15  | 0  | RDR2-resistant |
| TAAC TTTTACATATGAAATCGGAT    | 4   | 22 | RDR2-sensitive |
| TAAC TTTTATCGGACACTCGGCAA    | 0   | 31 | RDR2-sensitive |
| TAAGAAGCTAATGTAGACGTTTAC     | 0   | 9  | RDR2-sensitive |
| TAAGACACA ACTTAAGACACCCAC    | 0   | 9  | RDR2-sensitive |
| TAAGACAGGTCACGGAGCGGTATA     | 27  | 3  | RDR2-resistant |
| TAAGACAGTAGTGTAGACGTCCAC     | 0   | 9  | RDR2-sensitive |
| TAAGACAGTAGTGTAGGCGTCCAC     | 0   | 11 | RDR2-sensitive |
| TAAGACTCTTA ACTCGGCTGGTAA    | 0   | 9  | RDR2-sensitive |
| TAAGACTGAGATGGCTTTGGTTAC     | 0   | 14 | RDR2-sensitive |
| TAAGACTGTAGAAGGCTTTTTACT     | 52  | 10 | RDR2-resistant |
| TAAGACTTAGCCTCCAGTTGCGG      | 0   | 22 | RDR2-sensitive |
| TAAGAGACGACTATGACAGTTTAC     | 6   | 21 | RDR2-sensitive |
| TAAGAGATCATATGTGCATTGCAG     | 55  | 4  | RDR2-resistant |
| TAAGATATGATTGGTGTGCTTGCC     | 267 | 8  | RDR2-resistant |
| TAAGATGTCTTCTTGAGGATTCGG     | 25  | 4  | RDR2-resistant |
| TAAGATTCGGGACGGATACAGGAC     | 0   | 21 | RDR2-sensitive |
| TAAGATTGTAACCTTCATTGGCAT     | 0   | 11 | RDR2-sensitive |
| TAAGCACACAGACCGGCCTGACAC     | 0   | 9  | RDR2-sensitive |
| TAAGCAGACTGTCATGATAATGCT     | 73  | 2  | RDR2-resistant |
| TAAGCCCTGCTTTAGGACGTGGAC     | 0   | 10 | RDR2-sensitive |
| TAAGCGGGCGGGCTTGGACAGGAA     | 0   | 17 | RDR2-sensitive |
| TAAGCGTGTCTGGGCTTGGCAACAC    | 0   | 13 | RDR2-sensitive |
| TAAGCGTTTTGCTTGTAGTTGGA      | 0   | 30 | RDR2-sensitive |
| TAAGCTAGCTGCGAGGAGTCCGAC     | 17  | 0  | RDR2-resistant |
| TAAGCTCGGGCTCGTTCAGGCATG     | 0   | 10 | RDR2-sensitive |
| TAAGCTCTGCGCGGGATCGGCTAC     | 0   | 15 | RDR2-sensitive |
| TAAGCTGGACTGGGCACAGCACGG     | 0   | 10 | RDR2-sensitive |
| TAAGCTTATGTCCGACGGCCTCGT     | 0   | 12 | RDR2-sensitive |
| TAAGGAAACGAGCTGGCTCGGCTT     | 0   | 12 | RDR2-sensitive |
| TAAGGAACCGAGCCAGAGAACCAG     | 0   | 11 | RDR2-sensitive |
| TAAGGACCAGAGTGTGCATGTTGA     | 21  | 1  | RDR2-resistant |
| TAAGGATTGTGGTGTAAAGATTGCA    | 0   | 12 | RDR2-sensitive |
| TAAGGCACGCAGGACTGTGCAGGC     | 0   | 24 | RDR2-sensitive |
| TAAGGCCTGTGGCATGCACACTAG     | 34  | 2  | RDR2-resistant |
| TAAGGCGGGTCCCGTCGGAAGTAA     | 0   | 11 | RDR2-sensitive |
| TAAGGCTGTAGAAGGCTTTTTACT     | 65  | 5  | RDR2-resistant |
| TAAGGGCATGTACAGTGGAGAGAC     | 2   | 19 | RDR2-sensitive |
| TAAGGGTCTGTTTGGTTCCGGCTTT    | 0   | 9  | RDR2-sensitive |
| TAAGGGTCTGTTTGGTTGGGCTGT     | 0   | 24 | RDR2-sensitive |
| TAAGGTTATTCTTAGATCACTCGT     | 18  | 0  | RDR2-resistant |
| TAAGTACATTGTAAAGCGTCCGGA     | 29  | 3  | RDR2-resistant |
| TAAGTATATGGTGGCTTTATTACT     | 52  | 0  | RDR2-resistant |
| TAAGTATTTGCTATATGTTCCGAC     | 103 | 0  | RDR2-resistant |
| TAAGTCTGTAGCGTCAGCGTCCAC     | 0   | 13 | RDR2-sensitive |
| TAAGTGTTGGACTAGCACGGCCAG     | 0   | 9  | RDR2-sensitive |

|                           |      |    |                |
|---------------------------|------|----|----------------|
| TAAGTTAGGAGCACGATCATTGTC  | 23   | 0  | RDR2-resistant |
| TAAGTTCGTCGACTGGGACGGTGT  | 0    | 11 | RDR2-sensitive |
| TAAGTTGAATAAATTCGGACGGTT  | 22   | 2  | RDR2-resistant |
| TAAGTTGTATGTTTGGATGTGCAT  | 14   | 0  | RDR2-resistant |
| TAAGTTGTGTCTTAGAGTGTGTCT  | 0    | 15 | RDR2-sensitive |
| TAAGTTTAGATCGTGCCGACGGTG  | 30   | 2  | RDR2-resistant |
| TAAGTTTCTGTTAGGGTCCGGCCA  | 23   | 0  | RDR2-resistant |
| TAAGTTTGATTCTTGGATGGCATT  | 38   | 0  | RDR2-resistant |
| TAAGTTTTGGAGAGCTGACGTCAT  | 21   | 0  | RDR2-resistant |
| TAATAAAGATGTTGGTCTCGTCGT  | 0    | 9  | RDR2-sensitive |
| TAATAACACAACCGAGCTCGGCGC  | 0    | 9  | RDR2-sensitive |
| TAATACGATAAGTTCGACGGTTTT  | 0    | 9  | RDR2-sensitive |
| TAATACTTTGATCAGAGGGTGATG  | 18   | 0  | RDR2-resistant |
| TAATATTTTAGCAAGTCGGCAATA  | 54   | 2  | RDR2-resistant |
| TAATCAACTCCTGAACGAAGCTGC  | 44   | 0  | RDR2-resistant |
| TAATCGGATCGAATACGGACGGAT  | 3    | 20 | RDR2-sensitive |
| TAATCGGATCGGATACGGACGGAT  | 0    | 12 | RDR2-sensitive |
| TAATCGTGTCCGGCTGGCCCACGG  | 0    | 10 | RDR2-sensitive |
| TAATCTGATCGGAGGGGCGCGGAT  | 0    | 16 | RDR2-sensitive |
| TAATCTGGAACGGAGCGGCTCTGT  | 1    | 37 | RDR2-sensitive |
| TAATCTTAAGGATGGTGCCTCGTA  | 26   | 1  | RDR2-resistant |
| TAATGAGTCGGGCGTCCGGACGGT  | 0    | 17 | RDR2-sensitive |
| TAATGAGTTTCGGACGAAGGTCAT  | 3    | 22 | RDR2-sensitive |
| TAATGATCGAGCGATGACATTTAT  | 120  | 16 | RDR2-resistant |
| TAATGGACCACCTTAGATGATCAT  | 86   | 10 | RDR2-resistant |
| TAATGGACCAGAAGGCTTGTTTGT  | 72   | 4  | RDR2-resistant |
| TAATGGACTGTATCGGGGCAGCAC  | 0    | 14 | RDR2-sensitive |
| TAATGGCTAAGACTTGCATGGGCT  | 16   | 0  | RDR2-resistant |
| TAATGGGTTGTATATGGTTGACAG  | 22   | 0  | RDR2-resistant |
| TAATGGTAATGGGTTGTATATGGT  | 17   | 0  | RDR2-resistant |
| TAATGTGAACATCTATTGGCAT    | 39   | 4  | RDR2-resistant |
| TAATGTGTGAACAGGTATCTTCGG  | 0    | 52 | RDR2-sensitive |
| TAATGTGTTTGACATGATCTGGGA  | 198  | 3  | RDR2-resistant |
| TAATGTTATGGACTCGCATGTTGC  | 21   | 0  | RDR2-resistant |
| TAATGTTGCATAGGATTGTTGGCT  | 0    | 19 | RDR2-sensitive |
| TAATGTTTGTGTACTATTGGCATT  | 88   | 0  | RDR2-resistant |
| TAATTAATTTGCACCGTTGGTCTG  | 1184 | 0  | RDR2-resistant |
| TAATTCGGGCTAGTTTGGCAGCAA  | 0    | 10 | RDR2-sensitive |
| TAATTCGGTTCGGTCTATTCCGGT  | 2    | 14 | RDR2-sensitive |
| TAATTGCAGTTGTTGGACAAAGA   | 19   | 0  | RDR2-resistant |
| TAATTGTCCCTGTAGCATTAAAGGT | 0    | 9  | RDR2-sensitive |
| TAATTGTGGTGGATGAATAGGCAC  | 134  | 1  | RDR2-resistant |
| TAATTTGGACTGGTGGGAGGGCTA  | 1    | 20 | RDR2-sensitive |
| TAATTTGTAGATCTTCCATGGCC   | 43   | 1  | RDR2-resistant |
| TAATTTGTAGGTCCGATGATATAT  | 0    | 17 | RDR2-sensitive |
| TAATTTTCGACGGCCGTGACGCAT  | 0    | 11 | RDR2-sensitive |
| TAATTTTGTTAAGAAGATACTGTA  | 24   | 2  | RDR2-resistant |
| TAATTTTATCGGGCACTCGGCAA   | 0    | 9  | RDR2-sensitive |
| TAATTTTGTATCTACAGTTTACC   | 31   | 6  | RDR2-resistant |

|                           |    |    |                |
|---------------------------|----|----|----------------|
| TACACAATCTGATCTGACGGAGTC  | 16 | 0  | RDR2-resistant |
| TACACAATTTCCGGACGGTTGGCGT | 0  | 18 | RDR2-sensitive |
| TACACATGTGTGGACTGTCCGGCT  | 0  | 17 | RDR2-sensitive |
| TACACCGTTGGATATTGGACGGAT  | 0  | 11 | RDR2-sensitive |
| TACACGGATCGGGCTGGACCGGGC  | 1  | 39 | RDR2-sensitive |
| TACACGTTAGATGGGCTAGATCGT  | 0  | 13 | RDR2-sensitive |
| TACTACTACACATGGTCGGACGGTC | 0  | 9  | RDR2-sensitive |
| TACTACTATGTAGATCTGTATGTAC | 0  | 10 | RDR2-sensitive |
| TACTACTCGGCAAAGAACGCTCGGC | 0  | 30 | RDR2-sensitive |
| TACTACTCGGCAAAGAAGGCTCGGC | 0  | 11 | RDR2-sensitive |
| TACTACTGGGATGAGCACGATACAT | 0  | 9  | RDR2-sensitive |
| TACTACTGTAGATTGCACGGTTCGT | 0  | 11 | RDR2-sensitive |
| TACTACTGTGGTTGTGGATGTCGAC | 52 | 5  | RDR2-resistant |
| TACAGAAACGGACGGCACTGGCAC  | 0  | 57 | RDR2-sensitive |
| TACAGAATTCTTGCGTACAGTGAT  | 0  | 15 | RDR2-sensitive |
| TACAGACTCGGACGTGAGCCGACGG | 0  | 19 | RDR2-sensitive |
| TACAGATCGCAGGAGATTTACAAT  | 0  | 10 | RDR2-sensitive |
| TACAGATTGAAGGATATGGACGGC  | 18 | 1  | RDR2-resistant |
| TACAGCTCTGCTAGCGTGATGGAT  | 17 | 0  | RDR2-resistant |
| TACAGCTGTAGCTAGGATGGCAAC  | 0  | 9  | RDR2-sensitive |
| TACAGGACATGTGTAGGTAGTCGT  | 0  | 21 | RDR2-sensitive |
| TACAGGCATGCTCGGCTACTCCAG  | 27 | 3  | RDR2-resistant |
| TACAGTCTCCGGTATGATAGGCAT  | 19 | 0  | RDR2-resistant |
| TACAGTTGTTGGCTAGATTCCGGG  | 0  | 10 | RDR2-sensitive |
| TACATATTGATCAATTTCCGCCGGC | 45 | 3  | RDR2-resistant |
| TACATATTTGCTTGCAACTTGACA  | 15 | 0  | RDR2-resistant |
| TACATCGGTAATAGCGGCTTCTTT  | 0  | 12 | RDR2-sensitive |
| TACATCTGAACTTTTAGCTGCATT  | 72 | 2  | RDR2-resistant |
| TACATGCCTTTAGTGACCGACGCC  | 14 | 0  | RDR2-resistant |
| TACATGCTGCTGCTCCCTGACGGC  | 33 | 7  | RDR2-resistant |
| TACATGGAAGTGTAGTATGGTATT  | 14 | 0  | RDR2-resistant |
| TACATGTGGCACTGTCGTTTGGGT  | 20 | 0  | RDR2-resistant |
| TACATTTAAACATTAGTGTCCGA   | 14 | 0  | RDR2-resistant |
| TACATTTGGCGTCCGGTCCGGCTGG | 0  | 9  | RDR2-sensitive |
| TACCAAGAGCAGAACTCTCGGCAC  | 0  | 11 | RDR2-sensitive |
| TACCAAGAGCAGGACTCTCGGCAC  | 0  | 29 | RDR2-sensitive |
| TACCAAGCGTAGTACACTCGGCAT  | 0  | 23 | RDR2-sensitive |
| TACCACTCTGGGCCGGCGTAACGC  | 0  | 10 | RDR2-sensitive |
| TACCACTGTAGCAGCTTTAGCGGT  | 0  | 9  | RDR2-sensitive |
| TACCAGCAGACGGTCGAGCCAACA  | 24 | 0  | RDR2-resistant |
| TACCAGCTGAGAATTAGGCGTCTT  | 1  | 36 | RDR2-sensitive |
| TACCATCTTGTTCCGGTGTCCGTAT | 0  | 11 | RDR2-sensitive |
| TACCATTTTGTAGATAGATGGATC  | 38 | 2  | RDR2-resistant |
| TACCCATCGGGTATCGGGTCCGGG  | 2  | 22 | RDR2-sensitive |
| TACCCCTTGTTGGTTCTTTGGCAT  | 22 | 0  | RDR2-resistant |
| TACCCGACGGACTGTTCCGGTGCAC | 0  | 10 | RDR2-sensitive |
| TACCCGATTCTCGGCACAGGGCGT  | 0  | 9  | RDR2-sensitive |
| TACCCGTCATGCCGACTGCCGGT   | 0  | 10 | RDR2-sensitive |
| TACCCGTGCGTTGCGACGGCTCAC  | 0  | 9  | RDR2-sensitive |

|                           |     |    |                |
|---------------------------|-----|----|----------------|
| TACCCGTGGGTCTGTTATTGGCAA  | 0   | 43 | RDR2-sensitive |
| TACCCGTGGGTCTGTTATTGGGCA  | 5   | 76 | RDR2-sensitive |
| TACCCGTGGTCTGTTATTGGGCAA  | 0   | 10 | RDR2-sensitive |
| TACCCTAATGTATTTCTCTCGGAT  | 4   | 19 | RDR2-sensitive |
| TACCCTCGGGCTATAAAAGGGCAA  | 0   | 13 | RDR2-sensitive |
| TACCCTCTGCGACGGTGTGGACGG  | 0   | 15 | RDR2-sensitive |
| TACCCTGGAGGATGAGGTCGAGGA  | 30  | 0  | RDR2-resistant |
| TACCGAAAGCAGAACTCTCGGCAC  | 0   | 21 | RDR2-sensitive |
| TACCGAGAGTAGAACACTCGGCAC  | 0   | 33 | RDR2-sensitive |
| TACCGAGAGTAGGACACTCGGCAT  | 1   | 19 | RDR2-sensitive |
| TACCGAGCGCAGGACGTTGCCGAG  | 0   | 12 | RDR2-sensitive |
| TACCGATAGCAGGACTCTCGGCAC  | 3   | 44 | RDR2-sensitive |
| TACCGATATCAGGACACTCGGCAT  | 0   | 39 | RDR2-sensitive |
| TACCGCAGAGCGGATGAGGATGAT  | 21  | 1  | RDR2-resistant |
| TACCGCATCGGACGGAGCGGCTGC  | 0   | 9  | RDR2-sensitive |
| TACCGCGTAGGACAGTTCGGCTAG  | 0   | 13 | RDR2-sensitive |
| TACCGGAATCGACGGCTTTGCCAA  | 1   | 19 | RDR2-sensitive |
| TACCGGATACGGGTACTGATTCAA  | 0   | 16 | RDR2-sensitive |
| TACCGGATTGGTGGGTCGGAACGA  | 0   | 13 | RDR2-sensitive |
| TACCGGGCACTCGGCAAACTACTAC | 0   | 9  | RDR2-sensitive |
| TACCGGGCTCATTTGCGACGGGAT  | 0   | 13 | RDR2-sensitive |
| TACCTAATGTTAGGCTGTGGCGTC  | 0   | 9  | RDR2-sensitive |
| TACCTACAGTTTTGTTGTCGGGAT  | 90  | 0  | RDR2-resistant |
| TACCTATGGTTTGTAGATCTTGGT  | 53  | 3  | RDR2-resistant |
| TACCTCGATGATGAGTAGATCTAT  | 0   | 10 | RDR2-sensitive |
| TACCTCGGCGCCAATGATGACGGC  | 0   | 10 | RDR2-sensitive |
| TACCTCGTAGGACCACATTCGCAT  | 0   | 21 | RDR2-sensitive |
| TACCTGAGTGAACCTGGCAGTGGA  | 18  | 0  | RDR2-resistant |
| TACCTGCTCGTTGTATTGGTCGGT  | 0   | 9  | RDR2-sensitive |
| TACCTGGTTTTTGTTCGGCTACGGT | 32  | 1  | RDR2-resistant |
| TACCTGTACTTATTACTGCTA     | 17  | 0  | RDR2-resistant |
| TACCTGTAGCGCTGACTCTTGGCA  | 440 | 36 | RDR2-resistant |
| TACCTGTAGTGCACCGACGCGCCC  | 0   | 9  | RDR2-sensitive |
| TACCTGTTAGATTGCACTATGGAT  | 32  | 4  | RDR2-resistant |
| TACCTTCGGACTAAAGTTGGCATT  | 0   | 14 | RDR2-sensitive |
| TACCTTGTCAGTGTGGCTACTTAA  | 16  | 0  | RDR2-resistant |
| TACCTTGTTGGACGGCTAGAGTAC  | 0   | 11 | RDR2-sensitive |
| TACCTTTTGATCTACGGATTTACC  | 17  | 1  | RDR2-resistant |
| TACCTTTTGCAGGTTGACAGACA   | 17  | 0  | RDR2-resistant |
| TACGAACTGCAGAAAGGGTTGGTT  | 69  | 3  | RDR2-resistant |
| TACGAAGAAGCGGGGATTGTTGGT  | 16  | 0  | RDR2-resistant |
| TACGAAGAAGCGTGGATTGTTGGT  | 22  | 0  | RDR2-resistant |
| TACGAAGTCGGTGCAGGAAGATGT  | 3   | 26 | RDR2-sensitive |
| TACGAATAGAGTCGGGCCAGGCAC  | 0   | 15 | RDR2-sensitive |
| TACGAATAGGGTCGGGCCAGGCAC  | 0   | 30 | RDR2-sensitive |
| TACGAATCTCTCGGACTACGGCAC  | 1   | 44 | RDR2-sensitive |
| TACGACGAGCAAGCCTGACGCGCC  | 0   | 11 | RDR2-sensitive |
| TACGACGGAGACTGAGCCAGACGG  | 0   | 13 | RDR2-sensitive |
| TACGACGGAGGCTGAGTCAGACGT  | 0   | 13 | RDR2-sensitive |

|                           |    |    |                |
|---------------------------|----|----|----------------|
| TACGACGTAGAGCCGAAGAGAGGT  | 0  | 10 | RDR2-sensitive |
| TACGACTAGTGTATTCATACGGTT  | 84 | 0  | RDR2-resistant |
| TACGAGAACGGTAGAGGCATCCAT  | 0  | 10 | RDR2-sensitive |
| TACGAGCAGCTGGGTTGGAGGAAT  | 88 | 8  | RDR2-resistant |
| TACGATAATTCAGATTGCAGTCAT  | 18 | 0  | RDR2-resistant |
| TACGATTACGGATTACAGATCGGAT | 0  | 10 | RDR2-sensitive |
| TACGATTTGTACTTCCTGATGGTG  | 27 | 1  | RDR2-resistant |
| TACGCAGGGACGGCGGAAGATCGC  | 0  | 18 | RDR2-sensitive |
| TACGCAGTTGGGCTAGTCGTGCGT  | 0  | 44 | RDR2-sensitive |
| TACGCCCGCGCTAGCTCAGATCGT  | 0  | 16 | RDR2-sensitive |
| TACGCGACTCGACGATGACGGTCT  | 0  | 9  | RDR2-sensitive |
| TACGCTCCGGCGGCCCGAACCCT   | 0  | 9  | RDR2-sensitive |
| TACGCTGGAACCGTGAACAGGCAT  | 1  | 47 | RDR2-sensitive |
| TACGCTGGCACAAACGGACGTCGT  | 1  | 22 | RDR2-sensitive |
| TACGCTGGGATGAGCACGATACAT  | 0  | 22 | RDR2-sensitive |
| TACGGAAGCACGCGTTGGACGGAT  | 91 | 14 | RDR2-resistant |
| TACGGACTTAGACGGTACCCTATT  | 25 | 4  | RDR2-resistant |
| TACGGAGAGCTCGAAGGTGGATAT  | 0  | 11 | RDR2-sensitive |
| TACGGAGCATAGACTGCACGCACT  | 0  | 12 | RDR2-sensitive |
| TACGGATAGTTAGAAACGGGACGG  | 1  | 39 | RDR2-sensitive |
| TACGGATCACCGCAGGACTTGGTA  | 41 | 1  | RDR2-resistant |
| TACGGATGCTGCAGGAGGGTTCAT  | 0  | 17 | RDR2-sensitive |
| TACGGATTCAGGTATATAGTGCAT  | 0  | 9  | RDR2-sensitive |
| TACGGCGACACTCGGCAAAGACTG  | 0  | 9  | RDR2-sensitive |
| TACGGCTAAAATTCACCGGACTGT  | 3  | 26 | RDR2-sensitive |
| TACGGCTATAATTCACCGGACTGT  | 8  | 46 | RDR2-sensitive |
| TACGGCTCCAGCAAGGCACTCTAT  | 0  | 19 | RDR2-sensitive |
| TACGGCTGGAGTAGAGACCGGTGT  | 0  | 13 | RDR2-sensitive |
| TACGGGACCAGACTGAGCGGCTAC  | 0  | 9  | RDR2-sensitive |
| TACGGGCTGAAGACCAGTTGGCAT  | 1  | 31 | RDR2-sensitive |
| TACGGGTAAGGATACGGACAACAC  | 1  | 12 | RDR2-sensitive |
| TACGGGTACACAGAGGACTACCAT  | 0  | 20 | RDR2-sensitive |
| TACGGGTCGGGCTTGGGTTCGGCAC | 0  | 9  | RDR2-sensitive |
| TACGGTAGAATTTGGTATCCGCGA  | 0  | 13 | RDR2-sensitive |
| TACGGTGTAGTATATTTGAGGCAC  | 6  | 28 | RDR2-sensitive |
| TACGGTGTGTCTAGGGGGGTGAAT  | 0  | 10 | RDR2-sensitive |
| TACGGTTTCGGTTGGGTGTCGGGG  | 20 | 1  | RDR2-resistant |
| TACGTAGATGGCAGAACCGGTCAG  | 0  | 15 | RDR2-sensitive |
| TACGTATCCGGACAGTCCGCGCAT  | 0  | 10 | RDR2-sensitive |
| TACGTATGGTCTGTTGGTGGCTGC  | 0  | 9  | RDR2-sensitive |
| TACGTCAAGCGACTTTAGTCCGAT  | 36 | 0  | RDR2-resistant |
| TACGTCCGGCGCCTCAGACAGCAT  | 0  | 9  | RDR2-sensitive |
| TACGTCTGTGGAAGAAGCGGCGC   | 2  | 21 | RDR2-sensitive |
| TACGTCTGCAGCAAGAACCGGTAA  | 0  | 17 | RDR2-sensitive |
| TACGTGACAAAGATCGGGGCGCAA  | 0  | 21 | RDR2-sensitive |
| TACGTGACAAAGATGGGGGCGCAA  | 0  | 9  | RDR2-sensitive |
| TACGTGCAGCGCGTAGAAATCGGT  | 0  | 9  | RDR2-sensitive |
| TACGTGCGGGCGCGTGTGTCGCGG  | 0  | 12 | RDR2-sensitive |
| TACGTGGACCAGTCAGATCGCGTC  | 0  | 13 | RDR2-sensitive |

|                           |     |    |                |
|---------------------------|-----|----|----------------|
| TACGTGGATCTGACGTGGCAGCAC  | 0   | 20 | RDR2-sensitive |
| TACGTGGATCTGACGTGGCAGTAC  | 3   | 19 | RDR2-sensitive |
| TACGTGGATCTGATATGGCAGCAC  | 0   | 9  | RDR2-sensitive |
| TACGTGGATCTGATGTGGCAGCAC  | 0   | 35 | RDR2-sensitive |
| TACGTGGCTAGGGATTGAGGGCAG  | 0   | 31 | RDR2-sensitive |
| TACGTTGACTGTGACCAGACGCGT  | 0   | 16 | RDR2-sensitive |
| TACGTTGTACGGCGTGGTAGACGG  | 0   | 29 | RDR2-sensitive |
| TACTAATACTTTGATCAGAGGGTG  | 38  | 0  | RDR2-resistant |
| TACTACAGCTGTGGATGTGGGCAC  | 0   | 13 | RDR2-sensitive |
| TACTACTAGAACGATGCTTGAGGC  | 26  | 0  | RDR2-resistant |
| TACTAGACCGAGAGATAGCTGCTT  | 15  | 0  | RDR2-resistant |
| TACTAGAGCTCTCGGCACAGGGAC  | 0   | 10 | RDR2-sensitive |
| TACTAGGACATGTATATAGGCTAA  | 0   | 13 | RDR2-sensitive |
| TACTAGTTTGAGGATGCTTAGATA  | 41  | 0  | RDR2-resistant |
| TACTATATCAAGGACTATGGCGTC  | 1   | 13 | RDR2-sensitive |
| TACTATGGTTTGGTCTCGACGATG  | 14  | 0  | RDR2-resistant |
| TACTATTATTTTTCAGTTGGCATG  | 20  | 1  | RDR2-resistant |
| TACTCAGTAATCGGCTCAGGGCAT  | 0   | 11 | RDR2-sensitive |
| TACTCATATTCAGTGTAGCGGCAT  | 0   | 50 | RDR2-sensitive |
| TACTCCGTGTCTTTATCGTCGGAA  | 119 | 9  | RDR2-resistant |
| TACTCCTTGGACTACGGCGAACAC  | 0   | 23 | RDR2-sensitive |
| TACTCGACCTAGCATACTAGTATT  | 24  | 0  | RDR2-resistant |
| TACTCGAGGTGCTCTGGGGAGGCA  | 16  | 0  | RDR2-resistant |
| TACTCGTAACTCGTCCGACGACGG  | 0   | 19 | RDR2-sensitive |
| TACTCGTACTCGTAGATAGAGGCT  | 272 | 31 | RDR2-resistant |
| TACTCGTGCGTTGCGACGGCTCAC  | 0   | 20 | RDR2-sensitive |
| TACTCTACCGGACAAGACAGTGGC  | 0   | 13 | RDR2-sensitive |
| TACTCTCGGACGTCAATGCAGAGC  | 15  | 0  | RDR2-resistant |
| TACTCTCTGGTCAGGCGCGGACGG  | 1   | 17 | RDR2-sensitive |
| TACTCTGACTCAGATTATGCCGGT  | 91  | 24 | RDR2-resistant |
| TACTCTGATTCAGACTATGCCGGT  | 129 | 30 | RDR2-resistant |
| TACTCTGATTCAGACTATGCTGGT  | 18  | 1  | RDR2-resistant |
| TACTCTGTTGGATGGAAGATGCAT  | 1   | 57 | RDR2-sensitive |
| TACTGAACACCAGCGAGAGGCTGC  | 0   | 10 | RDR2-sensitive |
| TACTGAACGCCAACGAGAGGCTGC  | 0   | 11 | RDR2-sensitive |
| TACTGAACGCCAGTGAGAGGCTGC  | 0   | 11 | RDR2-sensitive |
| TACTGAAGGCTGCGCAGAAGTCAA  | 0   | 15 | RDR2-sensitive |
| TACTGACTCTGGGAGCTCGGCTGA  | 0   | 22 | RDR2-sensitive |
| TACTGAGCGTAGTACACTTGGCAT  | 1   | 22 | RDR2-sensitive |
| TACTGAGGGTAGCACACTCGGCAT  | 0   | 16 | RDR2-sensitive |
| TACTGAGGTGAGCGCGGGCGGACG  | 85  | 0  | RDR2-resistant |
| TACTGATAGGGACGAGACTTGCAT  | 17  | 1  | RDR2-resistant |
| TACTGATCTGGATATGAATCGGTT  | 30  | 3  | RDR2-resistant |
| TACTGATGATGGTAGAGAATTGTT  | 16  | 0  | RDR2-resistant |
| TACTGATTTGGGATATATGGTGTG  | 33  | 0  | RDR2-resistant |
| TACTGCAACTCTGACAAAGATAAGA | 26  | 0  | RDR2-resistant |
| TACTGCAGCGGGAGACTCTATCAG  | 0   | 18 | RDR2-sensitive |
| TACTGCTGACGGGAGGGGAAGGGAG | 2   | 21 | RDR2-sensitive |
| TACTGCTGATACTGCTGACGGTGC  | 0   | 17 | RDR2-sensitive |



|                            |     |     |                |
|----------------------------|-----|-----|----------------|
| TACTGGGACGGTAGCGGACGACGA   | 0   | 17  | RDR2-sensitive |
| TACTGTAGAAGACGCAGCCGCAGC   | 0   | 10  | RDR2-sensitive |
| TACTGTAGAAGAGGGTACCCCTGA   | 0   | 22  | RDR2-sensitive |
| TACTGTAGAAGCCGCAGCCGCAGC   | 11  | 362 | RDR2-sensitive |
| TACTGTAGAAGCCGCAGCCGCAGT   | 0   | 16  | RDR2-sensitive |
| TACTGTAGCACATGTAGGGGGCAC   | 0   | 12  | RDR2-sensitive |
| TACTGTAGCCCACGAGCCGGCCTG   | 0   | 12  | RDR2-sensitive |
| TACTGTAGCGCGTCATGACGGTTT   | 0   | 32  | RDR2-sensitive |
| TACTGTAGGATTCACCAGCAGAGC   | 24  | 0   | RDR2-resistant |
| TACTGTAGTGATCGGCGCCGGCGC   | 0   | 14  | RDR2-sensitive |
| TACTGTCTAGTGATTGTTGATGAC   | 106 | 12  | RDR2-resistant |
| TACTGTTAGAGCAGGGTGTTTTGT   | 37  | 0   | RDR2-resistant |
| TACTGTTACGCTGACTTGGCATT    | 28  | 51  | RDR2-sensitive |
| TACTGTTACAGGCTGACTTGGCATT  | 6   | 36  | RDR2-sensitive |
| TACTGTTTCATGTTGTAGAGGCTAC  | 0   | 31  | RDR2-sensitive |
| TACTGTTCTTGTGCGATTATGGTT   | 60  | 0   | RDR2-resistant |
| TACTGTTTCTATATTTTCGGAGGAT  | 82  | 2   | RDR2-resistant |
| TACTTAGATAAATCTGATGATGGA   | 21  | 2   | RDR2-resistant |
| TACTTATACATGTTAGCGGTCGTC   | 19  | 1   | RDR2-resistant |
| TACTTATCGTTTTCGGTCCGATGGC  | 0   | 12  | RDR2-sensitive |
| TACTTATGTGCTAGTAGACCGGAT   | 60  | 2   | RDR2-resistant |
| TACTTCCGACGGCTTAAGACGGGT   | 0   | 9   | RDR2-sensitive |
| TACTTCCGGTTAGTTCATCGTTGT   | 20  | 0   | RDR2-resistant |
| TACTTCCGACAGTCGGTAAAACGC   | 0   | 9   | RDR2-sensitive |
| TACTTCTAGTTAGAACGTCGTTGC   | 27  | 0   | RDR2-resistant |
| TACTTCTTGCTGCTCGTCGACGAT   | 59  | 6   | RDR2-resistant |
| TACTTGAGATCTAGTACTAGGAA    | 15  | 0   | RDR2-resistant |
| TACTTGTGTTTGTACTGTATAGGC   | 34  | 1   | RDR2-resistant |
| TACTTTCCGGTCAAGTCTTATCGT   | 0   | 9   | RDR2-sensitive |
| TACTTTCTATCGGGCACTCGGCAA   | 4   | 19  | RDR2-sensitive |
| TACTTTTTATCGGACACTCGGCAA   | 2   | 45  | RDR2-sensitive |
| TACTTTTTATCGGGCACTCGGCAA   | 8   | 102 | RDR2-sensitive |
| TACTTTTTCTCGGACACTCGGCAA   | 7   | 25  | RDR2-sensitive |
| TACTTTTTCTCGGACACTCGGCAT   | 1   | 14  | RDR2-sensitive |
| TACTTTTTCTCGGACAGTCGGTAA   | 1   | 22  | RDR2-sensitive |
| TACTTTTTCTCGGGCACTCGGCAA   | 60  | 175 | RDR2-sensitive |
| TACTTTTTCTCGGGCACTTGGCAA   | 0   | 10  | RDR2-sensitive |
| TACTTTTTGTCTCGGGCACTCGGCAA | 5   | 25  | RDR2-sensitive |
| TACTTTTTTCTCGGACACTCGGCAA  | 0   | 11  | RDR2-sensitive |
| TACTTTTTTCTCGGGCACTCGGCAA  | 4   | 38  | RDR2-sensitive |
| TAGAAACCAAGTTGGACCGGCCGT   | 0   | 20  | RDR2-sensitive |
| TAGAAACGGGACGGATACGGATAC   | 0   | 32  | RDR2-sensitive |
| TAGAAATTTAACTAGAACTTAGGT   | 30  | 4   | RDR2-resistant |
| TAGAAATTTAACTAGAACTTCGGT   | 81  | 0   | RDR2-resistant |
| TAGAAATTTGGATGGAGACCGGT    | 17  | 0   | RDR2-resistant |
| TAGAACACTCGGCAAAGACGCTGT   | 0   | 11  | RDR2-sensitive |
| TAGAACAGTAGTAGCTTGTGCATT   | 83  | 4   | RDR2-resistant |
| TAGAACCGTCGATGTTAGGGGCAA   | 0   | 24  | RDR2-sensitive |
| TAGAACTGTACGGTCTAATTCCAT   | 1   | 19  | RDR2-sensitive |

|                          |     |    |                |
|--------------------------|-----|----|----------------|
| TAGAACTTTAGATTTAGACTGCTG | 20  | 2  | RDR2-resistant |
| TAGAAGACGAAGGGTCCGGAGAC  | 0   | 20 | RDR2-sensitive |
| TAGAATAAGCGGGCGGGCTTGGAC | 1   | 25 | RDR2-sensitive |
| TAGAATGGACGGCTGAGATCGCAG | 1   | 29 | RDR2-sensitive |
| TAGAATGTTGCACAGGATTGTTGG | 17  | 0  | RDR2-resistant |
| TAGAATTGTTGCTCTCTACGGTAA | 100 | 7  | RDR2-resistant |
| TAGAATTGTTTGGTATCTTAGGCA | 40  | 0  | RDR2-resistant |
| TAGAATTTTGGAAATAGGCTGGCT | 19  | 0  | RDR2-resistant |
| TAGACCAAGTCGTATTTTCGTGCT | 25  | 2  | RDR2-resistant |
| TAGACCAGTACCGTCGTGTCGGAC | 0   | 10 | RDR2-sensitive |
| TAGACCATAGCACCCTGACGGCT  | 48  | 0  | RDR2-resistant |
| TAGACCGATCCGAGCAGAGTCTGT | 0   | 16 | RDR2-sensitive |
| TAGACGAAGACGACCAGAGCTGGC | 0   | 10 | RDR2-sensitive |
| TAGACGAATCTGCAGGCTGGATGG | 0   | 12 | RDR2-sensitive |
| TAGACGGAACCGGGCAGAACGCAG | 0   | 27 | RDR2-sensitive |
| TAGACGGCTTAAGATCGGCTCATC | 42  | 10 | RDR2-resistant |
| TAGACGGTCTGTGCTGCTACGGTG | 0   | 15 | RDR2-sensitive |
| TAGACGTGGAATAGGAGCGAGCAA | 0   | 15 | RDR2-sensitive |
| TAGACGTGTGGTAGATATGGTTAG | 0   | 29 | RDR2-sensitive |
| TAGACTAAAATTGAATCGAACGGT | 31  | 0  | RDR2-resistant |
| TAGACTACTGTCGTCCGACGGCCC | 264 | 16 | RDR2-resistant |
| TAGACTATAGAGTTGCATACAGAT | 29  | 1  | RDR2-resistant |
| TAGACTCAGCTAGTGCTTTTGGCA | 22  | 1  | RDR2-resistant |
| TAGACTCTCGGCAACGCGGCTCTT | 0   | 11 | RDR2-sensitive |
| TAGACTGCATGCGGAGTGGGATGG | 0   | 13 | RDR2-sensitive |
| TAGACTGCTGAGGGTATTAAGAGT | 141 | 2  | RDR2-resistant |
| TAGACTGGAAACGAGTGGAGTCGA | 0   | 14 | RDR2-sensitive |
| TAGACTGTAGCGTCGAGTCGTGTT | 0   | 9  | RDR2-sensitive |
| TAGACTGTGTGTGCGGACTGGCAC | 0   | 9  | RDR2-sensitive |
| TAGACTGTGTGTGTGGGCCGGCAC | 0   | 10 | RDR2-sensitive |
| TAGACTGTGTGTGTGGGCTGGCAC | 0   | 12 | RDR2-sensitive |
| TAGACTGTGTGTGTGGGTCGGCAC | 0   | 13 | RDR2-sensitive |
| TAGACTTACTGATTGTTGGCGCGC | 1   | 27 | RDR2-sensitive |
| TAGACTTGCTGTAGATGGCCTTAT | 0   | 9  | RDR2-sensitive |
| TAGAGAAGACTGTAAAGGACGGAT | 0   | 23 | RDR2-sensitive |
| TAGAGACATGTACAAACCCGGCAC | 0   | 23 | RDR2-sensitive |
| TAGAGACCAGAAGGACGAGGTCAT | 0   | 12 | RDR2-sensitive |
| TAGAGACGGCACTGGGATAGTCAT | 3   | 38 | RDR2-sensitive |
| TAGAGACGTTTTCACTGGCGCCAT | 0   | 13 | RDR2-sensitive |
| TAGAGATAGTCGCACAGGCACCAT | 0   | 9  | RDR2-sensitive |
| TAGAGCGTATTGGACGGTTGAGAT | 0   | 36 | RDR2-sensitive |
| TAGAGCTCTCGGCACAGGGACTGG | 2   | 21 | RDR2-sensitive |
| TAGAGCTGTAAGACTTTAGAAGAC | 0   | 24 | RDR2-sensitive |
| TAGAGCTGTTTGCCTGGCGTTTT  | 0   | 9  | RDR2-sensitive |
| TAGAGGACCTTGTTGGAGACGTAG | 0   | 10 | RDR2-sensitive |
| TAGAGGACTGCCAGGAGTAAGCAC | 0   | 17 | RDR2-sensitive |
| TAGAGGAGACTGTAAAGGACGGAT | 0   | 31 | RDR2-sensitive |
| TAGAGGAGTCTAGGTCGGCCGGCC | 2   | 19 | RDR2-sensitive |
| TAGAGGATGAATATAGAGGACGTT | 0   | 14 | RDR2-sensitive |

|                           |    |     |                |
|---------------------------|----|-----|----------------|
| TAGAGGATGGATATAGAGGACGTT  | 0  | 13  | RDR2-sensitive |
| TAGAGGATGTATATAGAGGACGTT  | 1  | 13  | RDR2-sensitive |
| TAGAGGATGTGGCAGACACTCTAA  | 0  | 9   | RDR2-sensitive |
| TAGAGGCATGTGGTCCATGGATGG  | 16 | 0   | RDR2-resistant |
| TAGAGTTTCGTTGATTGTTGTCTGA | 14 | 0   | RDR2-resistant |
| TAGATACCTCGGCGTTATAGGCAA  | 0  | 14  | RDR2-sensitive |
| TAGATAGAACTTCAGCGATCTGGT  | 33 | 2   | RDR2-resistant |
| TAGATATGTTAGTGACGACGTCGT  | 69 | 3   | RDR2-resistant |
| TAGATCACTAGTTTCATGGACATC  | 34 | 3   | RDR2-resistant |
| TAGATCCGGACTGGGTGTTGGCCA  | 53 | 8   | RDR2-resistant |
| TAGATCGACCTGGGATATGGCTAC  | 0  | 12  | RDR2-sensitive |
| TAGATCGGCACCCATGAACACGGT  | 0  | 15  | RDR2-sensitive |
| TAGATCGTTTTGAGTCGGGGTCGT  | 0  | 15  | RDR2-sensitive |
| TAGATGACTTGATGAAATTAGGCT  | 26 | 0   | RDR2-resistant |
| TAGATGGCAGAACGGCAGAACAGA  | 0  | 10  | RDR2-sensitive |
| TAGATGTAGATGGTTTGCAAGAAT  | 17 | 0   | RDR2-resistant |
| TAGATTCGGGACGGATACGGGTAA  | 0  | 10  | RDR2-sensitive |
| TAGATTCTGACCTCTTGCCGCGCT  | 99 | 4   | RDR2-resistant |
| TAGATTGCAGCTGTAGCGGTTCAA  | 0  | 9   | RDR2-sensitive |
| TAGATTTAGATATTGTTGGTCACT  | 15 | 0   | RDR2-resistant |
| TAGATTTCTTTGATGGTCGTGGAT  | 39 | 0   | RDR2-resistant |
| TAGATTTTGACCTCTTGCCGCGCT  | 14 | 0   | RDR2-resistant |
| TAGCAAAGGGCGGATGACAGAGAC  | 31 | 0   | RDR2-resistant |
| TAGCAACGGACGGTCGGTCGCTAA  | 3  | 53  | RDR2-sensitive |
| TAGCACGACCCAGTAGAGCAGGCA  | 0  | 10  | RDR2-sensitive |
| TAGCACGGACACGAGCTAGCACGG  | 0  | 9   | RDR2-sensitive |
| TAGCAGAACGGTAGAACGGACGAC  | 0  | 17  | RDR2-sensitive |
| TAGCAGACTAGTATATTTGTGCAT  | 24 | 1   | RDR2-resistant |
| TAGCAGATGTGGGACTAAAGCCGG  | 0  | 12  | RDR2-sensitive |
| TAGCAGGAGTAGATGAAGATGGTG  | 15 | 0   | RDR2-resistant |
| TAGCAGGTCGCAAAGCTCCGTCGG  | 15 | 0   | RDR2-resistant |
| TAGCATACCTCGGCGACAAGACCT  | 0  | 9   | RDR2-sensitive |
| TAGCATAGTAGAACTGGTGTGGAT  | 21 | 1   | RDR2-resistant |
| TAGCATGTAGACTCCTATGGCGTT  | 15 | 0   | RDR2-resistant |
| TAGCATGTCTGTTATTTTGGTCT   | 21 | 0   | RDR2-resistant |
| TAGCATGTGATCTAGGGGTGGCAA  | 19 | 0   | RDR2-resistant |
| TAGCATTTGATCGTCTGGTGGGTA  | 27 | 0   | RDR2-resistant |
| TAGCCAACGTATTTTAGCGTCGT   | 0  | 10  | RDR2-sensitive |
| TAGCCCCTGCGCCAGGTCGCGGAC  | 0  | 11  | RDR2-sensitive |
| TAGCCCCTGTGCCAGGTCGCGGAC  | 0  | 16  | RDR2-sensitive |
| TAGCCC GGCTGTATGAGACAGGCC | 0  | 23  | RDR2-sensitive |
| TAGCCC TAGTCAAACCGTCCGGAC | 0  | 13  | RDR2-sensitive |
| TAGCCGATGTGGGACTAAAGCCGG  | 5  | 247 | RDR2-sensitive |
| TAGCCGATGTGGGACTAATGCCGG  | 0  | 11  | RDR2-sensitive |
| TAGCCGCGCGTCGGAACCCGGTGC  | 0  | 9   | RDR2-sensitive |
| TAGCCGCTGCTCTGACAGAGACAA  | 0  | 32  | RDR2-sensitive |
| TAGCCGGATAGCTGGACGGTCCAT  | 0  | 19  | RDR2-sensitive |
| TAGCCGTTGGACAGAAAGCAGCAG  | 2  | 24  | RDR2-sensitive |
| TAGCCTCGGGGTGGACAACGGTTC  | 63 | 3   | RDR2-resistant |

|                           |     |    |                |
|---------------------------|-----|----|----------------|
| TAGCCTGGACCTGTTGAAGCACGT  | 0   | 13 | RDR2-sensitive |
| TAGCCTTTGATCGTCTGGTGGGTA  | 83  | 0  | RDR2-resistant |
| TAGCGAACACGGATGTCTCGGCGT  | 0   | 15 | RDR2-sensitive |
| TAGCGAACTGTACATCGGCAATAT  | 0   | 9  | RDR2-sensitive |
| TAGCGACGGACGGCGTGAACGCAA  | 0   | 9  | RDR2-sensitive |
| TAGCGAGCAGTTGTAGGCCCTGC   | 0   | 10 | RDR2-sensitive |
| TAGCGCATCTGAGCATGTAGACGC  | 0   | 30 | RDR2-sensitive |
| TAGCGCGGTGGTGGAGAAGTTGGC  | 27  | 0  | RDR2-resistant |
| TAGCGCGTGCCTGTAGCCGGCAT   | 3   | 32 | RDR2-sensitive |
| TAGCGCTGACTCTTGGCATTCTCT  | 206 | 13 | RDR2-resistant |
| TAGCGGACAGGACGGTTTACAGAC  | 0   | 10 | RDR2-sensitive |
| TAGCGGACGGATACAGAGTGTAC   | 0   | 21 | RDR2-sensitive |
| TAGCGGCGGGACGGAGATGGTGTG  | 27  | 0  | RDR2-resistant |
| TAGCGGGTATGGGGCAACAGAGAA  | 0   | 13 | RDR2-sensitive |
| TAGCGGTGCCAGGCCTGGACGGCT  | 0   | 9  | RDR2-sensitive |
| TAGCGTCGAGCGGTGTTACCTCAG  | 0   | 16 | RDR2-sensitive |
| TAGCGTCGATCTCTGACGTGGCGT  | 0   | 19 | RDR2-sensitive |
| TAGCGTTCCATGTAGAGTAGACGA  | 0   | 9  | RDR2-sensitive |
| TAGCTATCTGGTCGCGGACTCGGC  | 0   | 11 | RDR2-sensitive |
| TAGCTCAAGTCATCTCGTTCGGAT  | 119 | 0  | RDR2-resistant |
| TAGCTCAGATTATTTGGACTCGGC  | 0   | 12 | RDR2-sensitive |
| TAGCTCAGCTTGCTAGTTCGTCGT  | 3   | 52 | RDR2-sensitive |
| TAGCTCCTGCACCAGGTCGCGGAC  | 0   | 17 | RDR2-sensitive |
| TAGCTCGGCGCCAAGATCTGTGGC  | 0   | 11 | RDR2-sensitive |
| TAGCTCGGCGCCACAGATCTTGGC  | 1   | 26 | RDR2-sensitive |
| TAGCTCGGCGCTAAGATCTGTGGC  | 0   | 11 | RDR2-sensitive |
| TAGCTCGGCGTCACAGATCTTGGC  | 0   | 11 | RDR2-sensitive |
| TAGCTCGGCTCGGCTCGGATCGGC  | 1   | 16 | RDR2-sensitive |
| TAGCTCGTTCGTAGTAGCCGGTAT  | 0   | 9  | RDR2-sensitive |
| TAGCTCTGATAGCATGTTCCGGTTA | 0   | 13 | RDR2-sensitive |
| TAGCTGAAGCATATGGTACTGACT  | 27  | 0  | RDR2-resistant |
| TAGCTGAGACTGGTCTGATGGCGT  | 0   | 13 | RDR2-sensitive |
| TAGCTGAGAGAACGTTGCGCGGAC  | 0   | 13 | RDR2-sensitive |
| TAGCTGATGTGGGACGCCAGGCAT  | 0   | 30 | RDR2-sensitive |
| TAGCTGCATGACTGTGGTTATGGA  | 50  | 6  | RDR2-resistant |
| TAGCTGTAAGCACTCTCTCGGTAT  | 0   | 31 | RDR2-sensitive |
| TAGCTGTAGCAGCCGAAGGCGTGT  | 0   | 14 | RDR2-sensitive |
| TAGCTGTCCAGAACTAGCCGTTGGA | 2   | 18 | RDR2-sensitive |
| TAGCTGTCCACAACCAACGGTGC   | 2   | 77 | RDR2-sensitive |
| TAGCTGTGGGGAGAATCTGGCTGT  | 0   | 19 | RDR2-sensitive |
| TAGCTGTGTTGGACCGGCCGTAA   | 0   | 10 | RDR2-sensitive |
| TAGCTGTTACTCTACTGGCGGCAT  | 14  | 0  | RDR2-resistant |
| TAGCTTCTTAGAGGGACTATGGCC  | 42  | 2  | RDR2-resistant |
| TAGCTTGGATTCTGACTTAGAGGC  | 95  | 0  | RDR2-resistant |
| TAGCTTGGTTGTTTTGATCGTTGT  | 42  | 0  | RDR2-resistant |
| TAGCTTGTGCGAGCGGATGGACGTC | 0   | 22 | RDR2-sensitive |
| TAGCTTGTGCGAGCGGATTGACGTC | 4   | 47 | RDR2-sensitive |
| TAGGAACAGACAGAAGCAGGACGT  | 0   | 18 | RDR2-sensitive |
| TAGGAACCGAAGTTTTTGACGTAT  | 0   | 9  | RDR2-sensitive |

|                           |     |    |                |
|---------------------------|-----|----|----------------|
| TAGGAAGATGGTAGACCAGCGCAC  | 0   | 21 | RDR2-sensitive |
| TAGGACACCTGATCACGGTCACAT  | 0   | 10 | RDR2-sensitive |
| TAGGACAGTTCGGCTAGGCCAGAG  | 0   | 9  | RDR2-sensitive |
| TAGGACAGTTCGGCTAGGCCGGTG  | 0   | 10 | RDR2-sensitive |
| TAGGACATAATGGTCTTCGGACGA  | 355 | 9  | RDR2-resistant |
| TAGGACATCGCAACCCGAGAGCGG  | 0   | 9  | RDR2-sensitive |
| TAGGACATGATTGTGCATACCAAG  | 0   | 17 | RDR2-sensitive |
| TAGGACATTGTTACGGTGGCGGCG  | 33  | 2  | RDR2-resistant |
| TAGGACGATTGCTAGATGGGCCAG  | 20  | 0  | RDR2-resistant |
| TAGGACGGCCCACAGTGCTGGCAC  | 0   | 12 | RDR2-sensitive |
| TAGGACTACTTCCAGAGGTCTGGC  | 3   | 21 | RDR2-sensitive |
| TAGGACTAGGACCTCGTCAGGCGT  | 0   | 39 | RDR2-sensitive |
| TAGGACTAGGACCTCGTTAGGCGT  | 0   | 10 | RDR2-sensitive |
| TAGGACTCAATATGGAATGTGCAT  | 0   | 10 | RDR2-sensitive |
| TAGGACTCCCGATGCTTGACGCCA  | 25  | 4  | RDR2-resistant |
| TAGGACTCTCTGCGGAGGCGCGGA  | 0   | 17 | RDR2-sensitive |
| TAGGAGATATTTGGTTTTGATGAT  | 30  | 0  | RDR2-resistant |
| TAGGAGCATCTGGAAGGACGGTCT  | 0   | 9  | RDR2-sensitive |
| TAGGAGGAATAGGTCTGGCGGCGC  | 0   | 15 | RDR2-sensitive |
| TAGGAGTAGATGTAGCATAGTTCT  | 1   | 27 | RDR2-sensitive |
| TAGGAGTAGGACGGTGCCGACGAC  | 27  | 0  | RDR2-resistant |
| TAGGAGTAGGACGGTGTCGCCGAC  | 2   | 18 | RDR2-sensitive |
| TAGGATACATGAATCTTAGTGACT  | 17  | 1  | RDR2-resistant |
| TAGGATATGTCTGACGGTCCACAG  | 0   | 14 | RDR2-sensitive |
| TAGGATCAATCACAGAGAAGACAC  | 0   | 15 | RDR2-sensitive |
| TAGGATCTCGAAGGCGACAGGTTT  | 0   | 12 | RDR2-sensitive |
| TAGGATCTGAAGCGGTAGGGAGGC  | 0   | 11 | RDR2-sensitive |
| TAGGATGTAECTCGGGAGCAGCAG  | 0   | 11 | RDR2-sensitive |
| TAGGATGTCTAACCAAGTGCTGAT  | 37  | 0  | RDR2-resistant |
| TAGGATTCGACAAGTAGGCGCTAG  | 0   | 17 | RDR2-sensitive |
| TAGGATTTCTCATAAGTAGTGGA   | 20  | 0  | RDR2-resistant |
| TAGGCAAAGTGTGGCAACTGAGGT  | 0   | 14 | RDR2-sensitive |
| TAGGCAACGGAACGTGTGATGGTT  | 183 | 0  | RDR2-resistant |
| TAGGCACTGTCTGTCTGTCGTGAT  | 0   | 10 | RDR2-sensitive |
| TAGGCAGGCTGTGGCACCTTCGGC  | 0   | 19 | RDR2-sensitive |
| TAGGCATTTTGCTTGTTAGTCGGG  | 0   | 11 | RDR2-sensitive |
| TAGGCCACGGAAGTTTGAGGCAAT  | 34  | 6  | RDR2-resistant |
| TAGGCCAGCATGAACACGACCCAG  | 0   | 14 | RDR2-sensitive |
| TAGGCCGGTCTGTAAGCACGGAAA  | 0   | 9  | RDR2-sensitive |
| TAGGCGACTGAGCAGTAACCGGGC  | 0   | 10 | RDR2-sensitive |
| TAGGCGCACAAACCAACGTCTGGAC | 0   | 10 | RDR2-sensitive |
| TAGGCGCCCTGTTGGATTGTTGGG  | 15  | 0  | RDR2-resistant |
| TAGGCGGAGTGGTAGTGAGGGGA   | 23  | 1  | RDR2-resistant |
| TAGGCGGGCTGCAGGAGATGTCAC  | 0   | 9  | RDR2-sensitive |
| TAGGCTCGGGCGAGGCATGATCGA  | 1   | 22 | RDR2-sensitive |
| TAGGCTCGGGCGAGGCGTGATCGA  | 6   | 49 | RDR2-sensitive |
| TAGGCTCTCGGGAGATGGAGGACA  | 59  | 3  | RDR2-resistant |
| TAGGCTGAGGGATGACACAGTCAA  | 20  | 0  | RDR2-resistant |
| TAGGCTGTGAGAGTAGGGAGACCT  | 0   | 9  | RDR2-sensitive |

|                           |     |    |                |
|---------------------------|-----|----|----------------|
| TAGGCTGTGAGCCAGTGCTGCGGT  | 0   | 27 | RDR2-sensitive |
| TAGGCTTCTTCGTCATCGTCTGCA  | 26  | 0  | RDR2-resistant |
| TAGGCTTGCAAAGGACGTCGCTGC  | 0   | 11 | RDR2-sensitive |
| TAGGGAAGGATCAGCAGTAGACAT  | 1   | 12 | RDR2-sensitive |
| TAGGGAGACGGATGCGGAGACTGC  | 0   | 30 | RDR2-sensitive |
| TAGGGATTTAGCGGTGGGCGTCAT  | 0   | 9  | RDR2-sensitive |
| TAGGGCAACAGGCATGAAGGGCAC  | 0   | 9  | RDR2-sensitive |
| TAGGGCATGGCAGATGATGACGAC  | 0   | 10 | RDR2-sensitive |
| TAGGGCCCTGACGACGGGTGGCGT  | 0   | 9  | RDR2-sensitive |
| TAGGGCCCTGACGACGTGCGGCGT  | 1   | 70 | RDR2-sensitive |
| TAGGGCCTACGCTCCTACCGTCGG  | 50  | 0  | RDR2-resistant |
| TAGGGCGCATGACTGTGACGTCAT  | 0   | 11 | RDR2-sensitive |
| TAGGGCTAGTTTGGATCGGCGCGC  | 0   | 10 | RDR2-sensitive |
| TAGGGCTCTCGGCACAGGGACTGG  | 0   | 37 | RDR2-sensitive |
| TAGGGCTCTGGCGACGGACGGCGT  | 0   | 12 | RDR2-sensitive |
| TAGGGCTGGATATCGAGACGGTTC  | 0   | 12 | RDR2-sensitive |
| TAGGGCTTCTCTGCCTGACGGCCG  | 1   | 17 | RDR2-sensitive |
| TAGGGCTTGTTTCGGTTATTCCCAA | 0   | 28 | RDR2-sensitive |
| TAGGGCTTGTTTCGGTTATTTCAA  | 0   | 22 | RDR2-sensitive |
| TAGGGGATGGGGATGGGGAAGTTT  | 0   | 10 | RDR2-sensitive |
| TAGGGGCGCTGTAGAGGGCACCCG  | 0   | 15 | RDR2-sensitive |
| TAGGGGCTGGAGGTGGAGGGGACC  | 120 | 0  | RDR2-resistant |
| TAGGGGGAACCGCTGAAGACAGTC  | 1   | 21 | RDR2-sensitive |
| TAGGGGTAGATCTGAGCAAGACGT  | 0   | 49 | RDR2-sensitive |
| TAGGGTAGGATACAGGATGAGCTA  | 1   | 34 | RDR2-sensitive |
| TAGGGTCCTCTGCCTGACGGTCAG  | 0   | 9  | RDR2-sensitive |
| TAGGGTCGACACAGCGGAAGAAAT  | 15  | 0  | RDR2-resistant |
| TAGGGTTCGTTGCTGTTTTGGTCAT | 0   | 9  | RDR2-sensitive |
| TAGGGTTCTCTGTAGGCCGGACGG  | 0   | 10 | RDR2-sensitive |
| TAGGGTTGCGCGGCACGACACTGC  | 0   | 9  | RDR2-sensitive |
| TAGGGTTGGAGAGTTGTTCTAGA   | 20  | 0  | RDR2-resistant |
| TAGGGTTGTGTGGCCATTGATCGT  | 4   | 17 | RDR2-sensitive |
| TAGGGTTTGTGGAGTGCAGAGAGGT | 123 | 4  | RDR2-resistant |
| TAGGGTTTTAGATTCGTCCTCGAT  | 282 | 6  | RDR2-resistant |
| TAGGTACGATGAGCTAGTCGGCAC  | 2   | 21 | RDR2-sensitive |
| TAGGTACTACTACCGTGTCGGCAC  | 0   | 13 | RDR2-sensitive |
| TAGGTAGAGCGAGGCAATGGGCGC  | 0   | 9  | RDR2-sensitive |
| TAGGTAGTGCCGTGCCTGGGCCGA  | 0   | 13 | RDR2-sensitive |
| TAGGTAGTGTCTGACTAGGCCGA   | 0   | 12 | RDR2-sensitive |
| TAGGTCAGGACGGCACGACCCGAA  | 0   | 11 | RDR2-sensitive |
| TAGGTCATGGATTGTTGCAGGTAA  | 0   | 9  | RDR2-sensitive |
| TAGGTCCGAACCTCCAGCAGGGTCC | 0   | 13 | RDR2-sensitive |
| TAGGTCGTAGAAAGTTAGCGGCTC  | 0   | 10 | RDR2-sensitive |
| TAGGTCTGCATGATATTGATGGTT  | 0   | 10 | RDR2-sensitive |
| TAGGTCTGCTGTGAAGAAGACGAT  | 0   | 19 | RDR2-sensitive |
| TAGGTCTGTTAAGCGGGACTGGGT  | 25  | 1  | RDR2-resistant |
| TAGGTGACCTACTGATCTCGGAGC  | 0   | 10 | RDR2-sensitive |
| TAGGTGCAGTAGATGTGTATGGTA  | 61  | 6  | RDR2-resistant |
| TAGGTGTAGCAACAAGGAGTCGGT  | 0   | 16 | RDR2-sensitive |

|                           |     |    |                |
|---------------------------|-----|----|----------------|
| TAGGTGTTGTTGAATGGTCATGAG  | 22  | 0  | RDR2-resistant |
| TAGGTTCTGCTGGGCATTTGGTG   | 20  | 2  | RDR2-resistant |
| TAGGTTGACGGCCCGTGCCGGGCT  | 0   | 9  | RDR2-sensitive |
| TAGGTTGATTAATTTTGTACGGCT  | 124 | 5  | RDR2-resistant |
| TAGGTTGCTGGGAAGAGAGCGGAC  | 0   | 9  | RDR2-sensitive |
| TAGGTTGGTGTATTGGCAGTTTTT  | 14  | 0  | RDR2-resistant |
| TAGGTTTTCTGCCTGACGTCCGG   | 0   | 15 | RDR2-sensitive |
| TAGTAAACAATATTATGTACGGCT  | 26  | 0  | RDR2-resistant |
| TAGTAAAGAGAGTTGGATCGGCTT  | 19  | 1  | RDR2-resistant |
| TAGTACCTGCCAAGCGCTCGACAA  | 2   | 29 | RDR2-sensitive |
| TAGTACGGTATCTGATTACGGTTG  | 0   | 12 | RDR2-sensitive |
| TAGTACTGTAGCACCGGTAGGAGC  | 0   | 24 | RDR2-sensitive |
| TAGTACTGTGAGCAGGTGCAGACG  | 15  | 0  | RDR2-resistant |
| TAGTACTTGTGCAGATTTGTGGAT  | 67  | 3  | RDR2-resistant |
| TAGTAGAACGGACGGACGGTGCAG  | 0   | 11 | RDR2-sensitive |
| TAGTAGAATGTCTTAGATGTCATT  | 27  | 0  | RDR2-resistant |
| TAGTAGACTGTAGCGTCGAGTCGT  | 0   | 38 | RDR2-sensitive |
| TAGTATGCTGTAGTGAGATGCTAT  | 0   | 9  | RDR2-sensitive |
| TAGTATTTTCGGTTGGTAGTGGCA  | 171 | 6  | RDR2-resistant |
| TAGTCAGAGTAGGGACGGAGCTAG  | 0   | 9  | RDR2-sensitive |
| TAGTCAGCTGGAGGAGTTAGGTAA  | 0   | 11 | RDR2-sensitive |
| TAGTCCACAGTAGGTCATCGGAAC  | 0   | 9  | RDR2-sensitive |
| TAGTCGATGTAGTCATGGGCGGAC  | 0   | 31 | RDR2-sensitive |
| TAGTCGGAGGTGTGTGTGGTCATA  | 16  | 0  | RDR2-resistant |
| TAGTCGTAGAGTAGCGTCGGCGTC  | 20  | 0  | RDR2-resistant |
| TAGTCGTGCCGGGCTTGGGATGGC  | 0   | 40 | RDR2-sensitive |
| TAGTCGTGCTCGGACCGGACTGGC  | 0   | 14 | RDR2-sensitive |
| TAGTCGTTGCTGTGTAGAGGGTAC  | 0   | 10 | RDR2-sensitive |
| TAGTCTCGCACCGTGAGTCGGCAT  | 0   | 9  | RDR2-sensitive |
| TAGTCTCGCACTGTGAGTCGGCAT  | 0   | 23 | RDR2-sensitive |
| TAGTCTCTGTAGAGTGGCAGATTC  | 24  | 0  | RDR2-resistant |
| TAGTCTGTGGAGCGGTAAGGCAGC  | 0   | 9  | RDR2-sensitive |
| TAGTCTTCGCGGTAGACTTCGGTT  | 44  | 3  | RDR2-resistant |
| TAGTCTTTTATCATTTAGGTCCGT  | 23  | 0  | RDR2-resistant |
| TAGTCTTTTATCCTTTAGGTCCGT  | 15  | 0  | RDR2-resistant |
| TAGTGAATAGGTCCGTTTLAGAGGT | 22  | 0  | RDR2-resistant |
| TAGTGACCAGAGCCGGACGGCCTG  | 22  | 0  | RDR2-resistant |
| TAGTGACTCTTCCCTGGCAGAT    | 42  | 0  | RDR2-resistant |
| TAGTGCGCTTTGGACGAGTTGAGA  | 26  | 4  | RDR2-resistant |
| TAGTGCGGCTGAACCAGATGACAC  | 1   | 77 | RDR2-sensitive |
| TAGTGCGGCTGAACCGGATGACAC  | 0   | 10 | RDR2-sensitive |
| TAGTGCTAGGCGTAGAAGGTGCAG  | 0   | 9  | RDR2-sensitive |
| TAGTGCTGAACAGTAAGTCGGTAT  | 0   | 11 | RDR2-sensitive |
| TAGTGGAAGGCGGGCTGGGCAGCA  | 293 | 25 | RDR2-resistant |
| TAGTGGAGGAACATGCTTTGACCA  | 14  | 0  | RDR2-resistant |
| TAGTGGCGCTCGGCGAGTCGACAT  | 0   | 10 | RDR2-sensitive |
| TAGTGTATTCTGAGAAGCAGCTGA  | 4   | 20 | RDR2-sensitive |
| TAGTGTCGGATCGGCCATGCTAC   | 0   | 13 | RDR2-sensitive |
| TAGTGTCGTGACTAGGCCGAGCAT  | 0   | 10 | RDR2-sensitive |

|                           |     |    |                |
|---------------------------|-----|----|----------------|
| TAGTGTCGTGGACCGATCCGGCAT  | 0   | 25 | RDR2-sensitive |
| TAGTGTCGTGTCGGGTCGAGACGG  | 0   | 10 | RDR2-sensitive |
| TAGTGTCGTGTCTGGGCCGAGCAT  | 0   | 13 | RDR2-sensitive |
| TAGTGTGGACTCCAAGAAGACGAT  | 0   | 9  | RDR2-sensitive |
| TAGTGTGGTATCTGATTACGGTTG  | 0   | 11 | RDR2-sensitive |
| TAGTTAACTGAGAGACGACGGCCT  | 0   | 13 | RDR2-sensitive |
| TAGTTCAAGACGGTATGCTGTGGG  | 27  | 4  | RDR2-resistant |
| TAGTTCCGGTCCTAAAGCACGTCAT | 0   | 12 | RDR2-sensitive |
| TAGTTGAAGAAGGTTATGATGATT  | 96  | 4  | RDR2-resistant |
| TAGTTGACTGAGAGACGACAGCAT  | 0   | 11 | RDR2-sensitive |
| TAGTTGATGTCAAGTTACTGCGGT  | 43  | 1  | RDR2-resistant |
| TAGTTGTGGATGCGGGAGTTTGGC  | 0   | 12 | RDR2-sensitive |
| TAGTTTCTGATTGACTGTAACGGT  | 0   | 13 | RDR2-sensitive |
| TAGTTTGAGGATGCTTAGATAGGT  | 24  | 0  | RDR2-resistant |
| TAGTTTGTGCAACGGATTGGCATC  | 0   | 10 | RDR2-sensitive |
| TAGTTTGTGGATGGTACGTGCTA   | 85  | 4  | RDR2-resistant |
| TAGTTTTACTGTAGTGATCGGCCG  | 0   | 12 | RDR2-sensitive |
| TAGTTTTAGGTCTGGATCTAGGTT  | 113 | 1  | RDR2-resistant |
| TAGTTTTCCAAATGTCTGATCGTT  | 23  | 1  | RDR2-resistant |
| TAGTTTTTCGCTAGCGTAGCCTCC  | 17  | 0  | RDR2-resistant |
| TATAAATTTTTACTCGTCAGATAC  | 19  | 0  | RDR2-resistant |
| TATAACATGGAGCGGAAGTAGGTT  | 24  | 0  | RDR2-resistant |
| TATAACGGACCGTGCCAGCCCGGC  | 1   | 15 | RDR2-sensitive |
| TATAACTGTAGCGCGTAGGGGGCT  | 0   | 15 | RDR2-sensitive |
| TATAAGTAATTTGGATGAATCGGA  | 24  | 0  | RDR2-resistant |
| TATAAGTGACATTTAAGTCGGAT   | 0   | 9  | RDR2-sensitive |
| TATAATATTGATGAATTGGTCGGC  | 91  | 0  | RDR2-resistant |
| TATACAAATTATCTCATCGTCGTA  | 20  | 0  | RDR2-resistant |
| TATACCGGTCGTTGCTGGAGGCAT  | 0   | 17 | RDR2-sensitive |
| TATACCTGTACATGTGGGCCGGCC  | 75  | 1  | RDR2-resistant |
| TATACCTTGCTGTGAGACAGAATT  | 36  | 2  | RDR2-resistant |
| TATACGGAAATTTAGTGCGGATC   | 17  | 0  | RDR2-resistant |
| TATACGGCGAAACAATGATGTCAT  | 0   | 10 | RDR2-sensitive |
| TATACTCCAATGCATCCTGCCTAT  | 269 | 29 | RDR2-resistant |
| TATAGAATCAGGAGTAGTGATGAT  | 18  | 0  | RDR2-resistant |
| TATAGAATGTATGAGGCTGGAAGA  | 22  | 0  | RDR2-resistant |
| TATAGACTACTGTCGTCCGACGGC  | 25  | 0  | RDR2-resistant |
| TATAGACTGTAGTGTGGTGTCTAG  | 0   | 12 | RDR2-sensitive |
| TATAGCTACGATTTCGTTGGTCGTT | 27  | 0  | RDR2-resistant |
| TATAGGACGACTCGGTAGAAGCCA  | 0   | 19 | RDR2-sensitive |
| TATAGGAGGGTATGCGCGAGAGAG  | 68  | 2  | RDR2-resistant |
| TATAGGCGTAAGGAGAGGATCCAG  | 4   | 17 | RDR2-sensitive |
| TATAGTCGTGTAGAGACGGGCTAT  | 0   | 9  | RDR2-sensitive |
| TATAGTTTGTGGATGGTACGTGC   | 41  | 1  | RDR2-resistant |
| TATATAAGTATGTTATTGCGTCGT  | 39  | 1  | RDR2-resistant |
| TATATACCTTGCTGTGAGACAGAA  | 27  | 1  | RDR2-resistant |
| TATATATTGCAGAGGACTACATGT  | 55  | 0  | RDR2-resistant |
| TATATATTTCTCGGTCTTTTGGTT  | 91  | 1  | RDR2-resistant |
| TATATCAAGGACTGTGGCGTCATC  | 0   | 9  | RDR2-sensitive |



|                           |     |     |                |
|---------------------------|-----|-----|----------------|
| TATATCATGGACTGTGGCGTCATC  | 0   | 13  | RDR2-sensitive |
| TATATCGGACCGTGCCAGCCCGGC  | 2   | 23  | RDR2-sensitive |
| TATATGACAATATTCAGTAGACTT  | 41  | 5   | RDR2-resistant |
| TATATGCATTCTGTAGGAAGACAA  | 43  | 3   | RDR2-resistant |
| TATATGGTAGATTCAGATGAAGAC  | 18  | 0   | RDR2-resistant |
| TATATTCGGGACGGATACGGGTAA  | 4   | 31  | RDR2-sensitive |
| TATATTGCAGAGGACTACATGTTT  | 23  | 0   | RDR2-resistant |
| TATATTGGTTGTTGTTGGACGCAT  | 0   | 9   | RDR2-sensitive |
| TATATTGTTTGTGCATCTGTCCGA  | 84  | 3   | RDR2-resistant |
| TATATTTGTAGGGATAGGATGGAT  | 136 | 2   | RDR2-resistant |
| TATCAAAGTAAGACACTCGGCAT   | 0   | 9   | RDR2-sensitive |
| TATCAACCAACCGTAGGTCGCTGA  | 0   | 12  | RDR2-sensitive |
| TATCACGACTGTATAGGATGGTAT  | 0   | 36  | RDR2-sensitive |
| TATCACGATTGCGGTATTCAAACC  | 17  | 0   | RDR2-resistant |
| TATCACTGCTGTAGGATGACGGTT  | 50  | 0   | RDR2-resistant |
| TATCACTTTTAAGACTGCATTAAT  | 17  | 0   | RDR2-resistant |
| TATCAGTCGGCTGCTGTTACGGTC  | 41  | 0   | RDR2-resistant |
| TATCATTATTGTAGGACACGTCAT  | 0   | 23  | RDR2-sensitive |
| TATCATTTTGTGGTTAGGAATAAT  | 39  | 1   | RDR2-resistant |
| TATCCACGACCTTGAAGCGAGCTT  | 16  | 0   | RDR2-resistant |
| TATCCAGAGGGTGGCATAGAACTG  | 10  | 27  | RDR2-sensitive |
| TATCCCGGCTGCGTCTGTGACTGT  | 0   | 14  | RDR2-sensitive |
| TATCCTCGGACTCAAGTCAGGCAT  | 0   | 20  | RDR2-sensitive |
| TATCCTGTGTGGCTCAATAGAGGA  | 26  | 0   | RDR2-resistant |
| TATCCTTTTTTGGTGGTCTGCTT   | 30  | 2   | RDR2-resistant |
| TATCGAAGAACAAGAGTGAGCATT  | 21  | 1   | RDR2-resistant |
| TATCGAGAGCAGGACATTCGGCAC  | 0   | 13  | RDR2-sensitive |
| TATCGAGAGTAGGACATTCGGCAT  | 3   | 58  | RDR2-sensitive |
| TATCGAGCACTCGGCAGAACACGC  | 0   | 9   | RDR2-sensitive |
| TATCGATCCTTTAGACCTTCGGAG  | 42  | 10  | RDR2-resistant |
| TATCGCGGTGGGACTCACGGCGAA  | 0   | 11  | RDR2-sensitive |
| TATCGCGTAGGACAGTTCGGCAAG  | 0   | 9   | RDR2-sensitive |
| TATCGCGTAGGACAGTTCGGCTAG  | 2   | 135 | RDR2-sensitive |
| TATCGCTTTGTCTAGATTGTCTAA  | 35  | 0   | RDR2-resistant |
| TATCGGACACAAGCCTTAAGCCGT  | 0   | 21  | RDR2-sensitive |
| TATCGGACGTCAGCTGTAGACGGA  | 0   | 9   | RDR2-sensitive |
| TATCGGACTTTTTTCAATTGGTT   | 24  | 3   | RDR2-resistant |
| TATCGGCCGACTAGACAGACGCAT  | 0   | 37  | RDR2-sensitive |
| TATCGGCGTCATGATCTGAGGCAT  | 0   | 11  | RDR2-sensitive |
| TATCGGGCACTCGGCAAAGACTAC  | 0   | 10  | RDR2-sensitive |
| TATCGGGCACTCGGCAAAGCAGAC  | 2   | 15  | RDR2-sensitive |
| TATCGGGCACTCGGCAAAGTCGAC  | 0   | 9   | RDR2-sensitive |
| TATCGGTCTTTGGGCTAAACGGGT  | 1   | 35  | RDR2-sensitive |
| TATCGGTTTTCTCAGGAGCACGCA  | 23  | 0   | RDR2-resistant |
| TATCGTACCGGGCTGTGCCGAGGC  | 0   | 17  | RDR2-sensitive |
| TATCGTCAGTATAGGGAACGCGGC  | 0   | 12  | RDR2-sensitive |
| TATCGTCGCGCGGCTTCGCCACTT  | 0   | 9   | RDR2-sensitive |
| TATCGTGATTGTGACATTAGGTAT  | 0   | 13  | RDR2-sensitive |
| TATCGTGTTGGGCTTAGGTTGGTTT | 0   | 10  | RDR2-sensitive |

|                            |     |     |                |
|----------------------------|-----|-----|----------------|
| TATCGTTCCGGTAGAAAGCATTAAAT | 91  | 24  | RDR2-resistant |
| TATCGTTGAACTGTTAGTCAGCAT   | 1   | 16  | RDR2-sensitive |
| TATCGTTTAGGACAACGACACGGT   | 0   | 26  | RDR2-sensitive |
| TATCTATATCAAGTTGGAAGTATG   | 19  | 0   | RDR2-resistant |
| TATCTATCGGACATGAATGTGCAG   | 58  | 0   | RDR2-resistant |
| TATCTATTGAGGATGGAGTCTGCC   | 31  | 0   | RDR2-resistant |
| TATCTATTTGGTTGTCTGTTACAG   | 19  | 1   | RDR2-resistant |
| TATCTCGACCCGTAGTGCTGGCAC   | 0   | 15  | RDR2-sensitive |
| TATCTCGGCTCTCGCATCGATGAA   | 21  | 0   | RDR2-resistant |
| TATCTCGGTGTTATAGATCATGGC   | 0   | 19  | RDR2-sensitive |
| TATCTCTCCAGAAATTTGAGCATG   | 31  | 0   | RDR2-resistant |
| TATCTCTTGTAGTTTTTTGTTGTC   | 14  | 0   | RDR2-resistant |
| TATCTGAACACAATTTCTTATGGC   | 350 | 20  | RDR2-resistant |
| TATCTGACCTGGGCTGACGACTGC   | 0   | 33  | RDR2-sensitive |
| TATCTGACTAGTGGATGCACGCGC   | 0   | 9   | RDR2-sensitive |
| TATCTGATTCGTCCGGTCCGGTAT   | 0   | 19  | RDR2-sensitive |
| TATCTGGACTGGACGAGACGACGA   | 0   | 14  | RDR2-sensitive |
| TATCTGGTGGACCTGCAGGTGGGG   | 0   | 11  | RDR2-sensitive |
| TATCTGTAATATCTACACACTGGC   | 17  | 0   | RDR2-resistant |
| TATCTGTATCTCTCGAAGTAGACC   | 19  | 1   | RDR2-resistant |
| TATCTGTTTGGCAGAACTTCGGCT   | 0   | 11  | RDR2-sensitive |
| TATCTTAGAATTCTCTTAACGGCT   | 55  | 5   | RDR2-resistant |
| TATCTTAGAATTCTTTTTGCGGCA   | 23  | 0   | RDR2-resistant |
| TATCTTAGAATTCTTTTTGCGGCC   | 35  | 3   | RDR2-resistant |
| TATCTTCGGACTCAAGTCAGGCAT   | 0   | 22  | RDR2-sensitive |
| TATCTTCGGATTCAAGTCAGGCAT   | 0   | 13  | RDR2-sensitive |
| TATGAAAACTCTAGTTTTGGTCC    | 16  | 0   | RDR2-resistant |
| TATGAAACACGACGGATGCGGCTT   | 2   | 55  | RDR2-sensitive |
| TATGAAAGTCGTCATGCAATTAGT   | 146 | 0   | RDR2-resistant |
| TATGAAATGTGGGCCTGATGGCAA   | 0   | 16  | RDR2-sensitive |
| TATGAACAAGTAGAACATTAAGAA   | 23  | 1   | RDR2-resistant |
| TATGAACAGAACTCATTAAAGGCA   | 0   | 10  | RDR2-sensitive |
| TATGAACTGCTGTGGGGGACAGAT   | 0   | 13  | RDR2-sensitive |
| TATGAATGTATTGTAGGCGTGAC    | 0   | 25  | RDR2-sensitive |
| TATGAATTTATTGTAGACGTCCAT   | 0   | 24  | RDR2-sensitive |
| TATGACAATATTCAGTAGACTTAA   | 28  | 4   | RDR2-resistant |
| TATGACACTGTGGACAGCGTTTAC   | 0   | 11  | RDR2-sensitive |
| TATGACATGTGGAGCCAGTGGCAT   | 0   | 16  | RDR2-sensitive |
| TATGACATGTGGGACCAGTGGCAT   | 0   | 29  | RDR2-sensitive |
| TATGACATGTGGGGCCAGTGGCAC   | 0   | 10  | RDR2-sensitive |
| TATGACATGTGGGGCCAGTGGCAT   | 6   | 164 | RDR2-sensitive |
| TATGACATGTGGGGCTAGTGGCAT   | 0   | 10  | RDR2-sensitive |
| TATGACATTTTGCTGATAGGGCCG   | 68  | 2   | RDR2-resistant |
| TATGACGGATAAACTATATGTGT    | 0   | 11  | RDR2-sensitive |
| TATGACTGAAGAGATTAGTTCGTC   | 55  | 1   | RDR2-resistant |
| TATGACTGCAGAGGATTGTGGTAT   | 0   | 22  | RDR2-sensitive |
| TATGACTGCGGAGAATTATGGTAT   | 0   | 10  | RDR2-sensitive |
| TATGACTGCGGAGGATTATGGTAT   | 0   | 11  | RDR2-sensitive |
| TATGAGACATAGATTATTTTTGGT   | 23  | 0   | RDR2-resistant |

|                           |    |     |                |
|---------------------------|----|-----|----------------|
| TATGAGCAATTGATGGTACTCACT  | 21 | 0   | RDR2-resistant |
| TATGAGCGATCGACAGCGTGACGT  | 37 | 0   | RDR2-resistant |
| TATGAGTCTGTTAGGCCCGTCGGA  | 0  | 10  | RDR2-sensitive |
| TATGAGTGCGGAGGATTGCGGTAT  | 1  | 23  | RDR2-sensitive |
| TATGAGTGTAGAGGAGGAGAGCGC  | 0  | 9   | RDR2-sensitive |
| TATGATCAGATTCGTTTAAACAAAG | 27 | 1   | RDR2-resistant |
| TATGATCGGACGATTTATGTGCAT  | 1  | 30  | RDR2-sensitive |
| TATGATCTATCGGGCATCCGTCAT  | 0  | 9   | RDR2-sensitive |
| TATGATGACGGATTATATTCAGAC  | 17 | 0   | RDR2-resistant |
| TATGATGGACTCTTGGATGAGGCA  | 33 | 3   | RDR2-resistant |
| TATGATTTGTAGGCCCGATGGTAT  | 0  | 61  | RDR2-sensitive |
| TATGATTTGTGGATCCGATGGCAT  | 3  | 58  | RDR2-sensitive |
| TATGATTTGTGGGACTGATTGCAT  | 0  | 11  | RDR2-sensitive |
| TATGATTTGTGGGCCTGATGGCAT  | 0  | 29  | RDR2-sensitive |
| TATGATTTGTGGGTCCGATGGCAT  | 22 | 687 | RDR2-sensitive |
| TATGCAAGCTTTGAAGATCGAGAA  | 14 | 0   | RDR2-resistant |
| TATGCACTGTAGCGTACGAGTGAA  | 0  | 49  | RDR2-sensitive |
| TATGCAGTTGGGATTAGCGTGCAT  | 73 | 7   | RDR2-resistant |
| TATGCATTCTGTAGGAAGACAACA  | 24 | 3   | RDR2-resistant |
| TATGCGAGACTGGACCGGCCCGAC  | 0  | 23  | RDR2-sensitive |
| TATGCGCCTGAGGTGCTCGTCCGT  | 0  | 12  | RDR2-sensitive |
| TATGCGTTGACTGAGCAAGTGCGT  | 0  | 10  | RDR2-sensitive |
| TATGCTAGACTGGAGGCACGACGA  | 0  | 65  | RDR2-sensitive |
| TATGCTAGCACGGCTCGAAGACAA  | 0  | 10  | RDR2-sensitive |
| TATGCTCGACGGGATTGTCGGCCA  | 40 | 10  | RDR2-resistant |
| TATGCTGCTGGATTCTCAAGACGT  | 23 | 0   | RDR2-resistant |
| TATGCTGGAGCGGTATTACTCAA   | 42 | 0   | RDR2-resistant |
| TATGCTGGATGTAAGTTCGATAGG  | 18 | 1   | RDR2-resistant |
| TATGGAACCTTTGTTGAGATGTGTT | 40 | 0   | RDR2-resistant |
| TATGGAAGAATTTGGTGCATTCAT  | 18 | 0   | RDR2-resistant |
| TATGGACATCAGGAGCCGCTCCGC  | 0  | 18  | RDR2-sensitive |
| TATGGACCCGGCTGAAAGACGTAC  | 0  | 9   | RDR2-sensitive |
| TATGGACCTCTCTAGAAGCAGCGT  | 0  | 14  | RDR2-sensitive |
| TATGGACTAGTAGCATACCGGTGC  | 0  | 130 | RDR2-sensitive |
| TATGGAGTGTTTATAGAACGTCGT  | 0  | 9   | RDR2-sensitive |
| TATGGATTAACATGCTGATGAGG   | 32 | 1   | RDR2-resistant |
| TATGGATTGAACTGCTTACCCAAT  | 38 | 3   | RDR2-resistant |
| TATGGATTGCAGCAGTAGTACGAT  | 0  | 13  | RDR2-sensitive |
| TATGGATTTTGTTCGGAAATGCA   | 20 | 0   | RDR2-resistant |
| TATGGCGCCGAGCAAAGGGTCCAA  | 0  | 18  | RDR2-sensitive |
| TATGGCGCCGAGCTGTGACGTGGC  | 1  | 15  | RDR2-sensitive |
| TATGGCGTCGAGCTCTGACGCGGC  | 0  | 12  | RDR2-sensitive |
| TATGGCTCCTGCTCTAGACGCTAA  | 0  | 13  | RDR2-sensitive |
| TATGGCTTCGGCGGCAAGGGCACC  | 25 | 0   | RDR2-resistant |
| TATGGCTTGATAGTATGACGACGG  | 0  | 9   | RDR2-sensitive |
| TATGGGCTGATTAAAGGTACATTC  | 14 | 0   | RDR2-resistant |
| TATGGGTACGGTAGAATTTGGTAT  | 0  | 21  | RDR2-sensitive |
| TATGGGTGAACTGCTGAACACGGT  | 0  | 9   | RDR2-sensitive |
| TATGGTAGACTGTACGGTGACCTA  | 0  | 9   | RDR2-sensitive |

|                           |    |     |                |
|---------------------------|----|-----|----------------|
| TATGGTAGATTTCAGATGAAGACTG | 17 | 0   | RDR2-resistant |
| TATGGTGGGGGCTCTGCAAGTGGA  | 25 | 1   | RDR2-resistant |
| TATGGTTGTTGTTTCATTCCGGGT  | 48 | 0   | RDR2-resistant |
| TATGGTTTGGTCTCGACGATGGAT  | 17 | 0   | RDR2-resistant |
| TATGGTTTGTAGATCTTGGTCAAG  | 31 | 1   | RDR2-resistant |
| TATGTAAGTGGGCGGATAGGTGGA  | 0  | 10  | RDR2-sensitive |
| TATGTACGACAAGCTCCGGCGCAG  | 1  | 16  | RDR2-sensitive |
| TATGTAGAAATGTGCATAAATCAT  | 9  | 108 | RDR2-sensitive |
| TATGTAGAATTTGTATGCAAGCAA  | 47 | 4   | RDR2-resistant |
| TATGTAGCTATTGTAGGCGTGCAC  | 0  | 9   | RDR2-sensitive |
| TATGTAGGAATGGCAACTGTACAT  | 0  | 13  | RDR2-sensitive |
| TATGTAGGCTTGATGATCGAGGAC  | 24 | 2   | RDR2-resistant |
| TATGTATAATGACAGATGTTGGAT  | 16 | 0   | RDR2-resistant |
| TATGTATGTATTGTAGGCGTGCAC  | 1  | 22  | RDR2-sensitive |
| TATGTATTGATGTTGGTAGGCTAC  | 0  | 16  | RDR2-sensitive |
| TATGTCCGACGGCATCGTAGACAG  | 4  | 76  | RDR2-sensitive |
| TATGTCCGCTAGGACAGTTCGGCT  | 0  | 22  | RDR2-sensitive |
| TATGTCTAGATTGTATCGGTGCGT  | 0  | 11  | RDR2-sensitive |
| TATGTCTGGTCGGAAGCATGGCGC  | 0  | 18  | RDR2-sensitive |
| TATGTCTTGATGAATCCACGGC    | 51 | 3   | RDR2-resistant |
| TATGTGACTGATTATGGTGGTATT  | 98 | 3   | RDR2-resistant |
| TATGTGATTGTTGAAGGAGCGCAT  | 0  | 12  | RDR2-sensitive |
| TATGTGCACTATGTAGAAGACCGT  | 0  | 17  | RDR2-sensitive |
| TATGTGCAGTCGGACTCTTGGCGT  | 0  | 10  | RDR2-sensitive |
| TATGTGGAGCTCGAAGGTGGATAT  | 0  | 13  | RDR2-sensitive |
| TATGTGTTGACTAAGTGACGGACA  | 0  | 9   | RDR2-sensitive |
| TATGTGTTTGGACATTCGTTTGCA  | 20 | 0   | RDR2-resistant |
| TATGTTCCGACGCTCAGAAAGGCT  | 80 | 11  | RDR2-resistant |
| TATGTTGCTGGATTCTCAAGACGT  | 20 | 0   | RDR2-resistant |
| TATGTTGGAAGGGCAAAGGGCAA   | 0  | 17  | RDR2-sensitive |
| TATGTTGGCTATTGCAAAGGTGGT  | 49 | 2   | RDR2-resistant |
| TATGTTGTCGTCGGTAGCGGCTAA  | 0  | 12  | RDR2-sensitive |
| TATGTTGTTTACTGTTGTGATGGA  | 0  | 11  | RDR2-sensitive |
| TATGTTTGTATCGTAGGCGTCCAT  | 0  | 34  | RDR2-sensitive |
| TATGTTTGTGGCTAGATTTGCGG   | 52 | 78  | RDR2-sensitive |
| TATTAACGGATCGTGCTTCGGGC   | 0  | 14  | RDR2-sensitive |
| TATTAACGGGCCGTCCTTCGGAC   | 0  | 23  | RDR2-sensitive |
| TATTAACGGGTCGTGCTTCGGGC   | 1  | 14  | RDR2-sensitive |
| TATTAATGGGTCGTGCCTCGGGC   | 0  | 11  | RDR2-sensitive |
| TATTAAGAAATCATAATCGTTGGT  | 21 | 0   | RDR2-resistant |
| TATTAAGGCTGTAAGAGTAGTCGG  | 0  | 26  | RDR2-sensitive |
| TATTAAGGGCTTAGCGTAGACTGC  | 0  | 9   | RDR2-sensitive |
| TATTACAGATAAGTTTAGATCGTG  | 36 | 0   | RDR2-resistant |
| TATTACATGGTCGTTATCTAGGAT  | 26 | 0   | RDR2-resistant |
| TATTAGCTATGATGTTTGGATGTT  | 46 | 0   | RDR2-resistant |
| TATTAGGACCGGGTATGACGGAT   | 0  | 28  | RDR2-sensitive |
| TATTATAACAGTCGTCTGAATCCT  | 16 | 0   | RDR2-resistant |
| TATTATAGACTGTATCTAGGCATA  | 56 | 3   | RDR2-resistant |
| TATTATATCGATTGTTAGCAGTAT  | 29 | 2   | RDR2-resistant |

|                           |     |    |                |
|---------------------------|-----|----|----------------|
| TATCAAGGACTGTTCAAGCAAGG   | 65  | 4  | RDR2-resistant |
| TATTCATAGAGACTCAGGATCATC  | 30  | 4  | RDR2-resistant |
| TATTCGACTTTAGTGACGGTTCT   | 0   | 18 | RDR2-sensitive |
| TATTCGCTATATGTTTCGGACGCTC | 0   | 12 | RDR2-sensitive |
| TATTCGGATTCGGACTATGCGGGG  | 14  | 0  | RDR2-resistant |
| TATTCGGGTTTTCGGGTTCGGGT   | 0   | 16 | RDR2-sensitive |
| TATTCGGTGATGGGAATCAAGGCA  | 17  | 1  | RDR2-resistant |
| TATTCGTACCGGGCCGAAACGGGT  | 0   | 23 | RDR2-sensitive |
| TATTCGTGCTGGGCTCAAACGGGC  | 0   | 13 | RDR2-sensitive |
| TATTCTACAGGGCTAGTTTGCCAA  | 15  | 0  | RDR2-resistant |
| TATTCTGGGCTTGTGTGAGATGGT  | 0   | 10 | RDR2-sensitive |
| TATTCTGTCTGATTGGTTCGGTGT  | 0   | 9  | RDR2-sensitive |
| TATTGAAAATGGTCGTTTCATGGCT | 32  | 5  | RDR2-resistant |
| TATTGAACTGTGGGCGACGTGCGC  | 0   | 11 | RDR2-sensitive |
| TATTGACTTCGGTACTGACGTCAT  | 24  | 0  | RDR2-resistant |
| TATTGCAGAGGACTACATGTTTCT  | 53  | 0  | RDR2-resistant |
| TATTGGACTAGGCGAGACATTACA  | 19  | 0  | RDR2-resistant |
| TATTGTAGACATAATCGAGTGGCT  | 0   | 12 | RDR2-sensitive |
| TATTGTGGGACAATGATTGGAAGA  | 74  | 5  | RDR2-resistant |
| TATTGTTTAGAACATCTACACGGT  | 0   | 19 | RDR2-sensitive |
| TATTGTTTGTCGTTTCGGGGTACC  | 37  | 2  | RDR2-resistant |
| TATTGTTTTATCCGGTGAGACTGA  | 38  | 1  | RDR2-resistant |
| TATTGTTTTGGTGAGTCTGGAGAA  | 16  | 0  | RDR2-resistant |
| TATTGTTTTACTCTGCTGGACGA   | 0   | 11 | RDR2-sensitive |
| TATTTACAAATGTAGATGTGTCTG  | 53  | 2  | RDR2-resistant |
| TATTTACATGTGTTGTTTGGACTG  | 25  | 0  | RDR2-resistant |
| TATTTAGTTTGGCATAGAAAGGTA  | 42  | 3  | RDR2-resistant |
| TATTTATGGATACAGTTAGACTTC  | 38  | 1  | RDR2-resistant |
| TATTTATGTGCATCTCGACCGGAC  | 51  | 4  | RDR2-resistant |
| TATTTATGTGCTAGTAGACCGGAC  | 82  | 5  | RDR2-resistant |
| TATTTATGTGCTAGTAGACCGGAT  | 83  | 11 | RDR2-resistant |
| TATTTATGTGTAGCGTTCGTATATC | 57  | 0  | RDR2-resistant |
| TATTTATTGGACTGGGCAATTACT  | 31  | 3  | RDR2-resistant |
| TATTTCCGGCACTCGGCAAAGAGC  | 1   | 34 | RDR2-sensitive |
| TATTTCTCGGTCTTTTGGTTAAAA  | 54  | 1  | RDR2-resistant |
| TATTTGACTACTAGATATGTTGGC  | 20  | 0  | RDR2-resistant |
| TATTTGACTGGAAGTTTAATGGCA  | 20  | 1  | RDR2-resistant |
| TATTTGATCGGATATCGGATACTT  | 1   | 17 | RDR2-sensitive |
| TATTTGCGCGGACAGTTTGGTGTA  | 34  | 0  | RDR2-resistant |
| TATTTGCTATATGTTTCGGACGCTC | 101 | 0  | RDR2-resistant |
| TATTTGCTCTGTGTGCTTGGGAGA  | 68  | 0  | RDR2-resistant |
| TATTTGGTCTGTGGCTAAGGGCAT  | 0   | 13 | RDR2-sensitive |
| TATTTGTCAATCGGTTTTCGGTCC  | 17  | 0  | RDR2-resistant |
| TATTTGTGACACAATTCGTTGGA   | 16  | 0  | RDR2-resistant |
| TATTTTAGATATGTTAGTGACGAC  | 55  | 0  | RDR2-resistant |
| TATTTTAGCAAGTCGGCAATACCA  | 55  | 2  | RDR2-resistant |
| TATTTTATGGTTGTAGTGAGGTAT  | 0   | 20 | RDR2-sensitive |
| TATTTTGTCTAACTGTTGAAAGGA  | 23  | 0  | RDR2-resistant |
| TATTTTGTGTAGATAAATGGCAC   | 25  | 4  | RDR2-resistant |

|                           |     |    |                |
|---------------------------|-----|----|----------------|
| TATTTTGTTCGCGGACGGATAC    | 0   | 42 | RDR2-sensitive |
| TATTTTTCATTATGGTTTTGTCGA  | 20  | 0  | RDR2-resistant |
| TCAAAAACCTGAACCCTGACGGTCT | 0   | 11 | RDR2-sensitive |
| TCAAAACACTGTCGGGCACGGCAC  | 0   | 17 | RDR2-sensitive |
| TCAAACCCGGGCTGTGAGAGGAG   | 0   | 14 | RDR2-sensitive |
| TCAAATGAGTTCGGCTTAAGGAT   | 32  | 3  | RDR2-resistant |
| TCAAACAGATGAGGATGTGCTAGA  | 19  | 0  | RDR2-resistant |
| TCAAACATTGATCTAGGAGACCAT  | 39  | 8  | RDR2-resistant |
| TCAAACGGACAGGCTGGAATGGGC  | 0   | 11 | RDR2-sensitive |
| TCAAACCTGATTGTATGAAGATGCC | 143 | 7  | RDR2-resistant |
| TCAAACCTGGTCTTAGGGTCGTCTG | 15  | 0  | RDR2-resistant |
| TCAAAGACCTGCTGATTTACTGCA  | 20  | 2  | RDR2-resistant |
| TCAAATATAATTGTGTGTCGTCGT  | 141 | 2  | RDR2-resistant |
| TCAAATATCTGTCCGACCCGGCAC  | 0   | 15 | RDR2-sensitive |
| TCAAATATGATTGTGTGTCGTCGC  | 0   | 9  | RDR2-sensitive |
| TCAAATGTCTGTGCGAGCCCGGCAC | 0   | 19 | RDR2-sensitive |
| TCAAATGTCTGTGCGGGCTCGGCAC | 0   | 14 | RDR2-sensitive |
| TCAAATGTCTGTGCGGGTCCGGCAC | 0   | 16 | RDR2-sensitive |
| TCAACACATGTTGGATAAAATGGC  | 17  | 0  | RDR2-resistant |
| TCAACCCATGGACTAGTTTGGCAT  | 1   | 14 | RDR2-sensitive |
| TCAACCTTTTCGTTGGGTCATGTC  | 15  | 0  | RDR2-resistant |
| TCAACGCGACTCTGTGAGGAACGG  | 0   | 62 | RDR2-sensitive |
| TCAACGTGACTGTACGGGACGGAC  | 0   | 10 | RDR2-sensitive |
| TCAACGTGAGGACGGTACGGATAT  | 1   | 50 | RDR2-sensitive |
| TCAACTAATCTTCTTGAGCTCGGC  | 58  | 0  | RDR2-resistant |
| TCAACTCATCTCGGACCATCGCAT  | 0   | 15 | RDR2-sensitive |
| TCAACTCTCTCTGCAGGATGACTC  | 35  | 1  | RDR2-resistant |
| TCAACTGCTGAATCATGGACGGAT  | 0   | 10 | RDR2-sensitive |
| TCAACTGTAGTAGGAGGAGGGCAT  | 0   | 9  | RDR2-sensitive |
| TCAACTGTCCACTCTGCAACGGCC  | 5   | 24 | RDR2-sensitive |
| TCAACTGTCTACTCTACAACGGCC  | 2   | 15 | RDR2-sensitive |
| TCAACTGTGGGGCATATATGCATT  | 74  | 3  | RDR2-resistant |
| TCAACTGTTATGCATCCATCTAGC  | 34  | 1  | RDR2-resistant |
| TCAAGAACTGGTTACGTCTAGCT   | 47  | 2  | RDR2-resistant |
| TCAAGAACTCGAGGAATTTAGGC   | 77  | 9  | RDR2-resistant |
| TCAAGAACTCTCAAATTGAAGGCT  | 44  | 6  | RDR2-resistant |
| TCAAGACTAGGTGGGCAAGCTGCA  | 22  | 1  | RDR2-resistant |
| TCAAGCCTGCCCGCGTTCGTCGA   | 1   | 34 | RDR2-sensitive |
| TCAAGGACTGTTCAAGCAAGGACA  | 25  | 4  | RDR2-resistant |
| TCAAGGCACAGTGTCCGACGGTCC  | 0   | 14 | RDR2-sensitive |
| TCAAGGACTGCACGGCGTATCGT   | 0   | 9  | RDR2-sensitive |
| TCAAGGTCGGTGTAGTTGACGCGC  | 0   | 17 | RDR2-sensitive |
| TCAAGGTTTACGAGAGCTGACGAC  | 24  | 0  | RDR2-resistant |
| TCAAGTCAGCTGTTGAAACGGTAA  | 0   | 16 | RDR2-sensitive |
| TCAAGTCGGCGTTTCTTAACGGCG  | 92  | 5  | RDR2-resistant |
| TCAAGTCGTCAGGCTACCCGGTGC  | 0   | 11 | RDR2-sensitive |
| TCAAGTGCCCTTGAATCTGAGGAT  | 52  | 4  | RDR2-resistant |
| TCAATAAATCTATGTCCGACGACT  | 19  | 38 | RDR2-sensitive |
| TCAATAGAAATTTTGAATGGAGAC  | 17  | 0  | RDR2-resistant |

|                             |     |    |                |
|-----------------------------|-----|----|----------------|
| TCAATCGATGTGTAGTGTGATGGT    | 113 | 5  | RDR2-resistant |
| TCAATGAAGACCGTTGGTGGGCAT    | 32  | 1  | RDR2-resistant |
| TCAATGACATGTGGGGTCCATGGT    | 0   | 15 | RDR2-sensitive |
| TCAATGATTGTGTAATGTGTTGGC    | 17  | 0  | RDR2-resistant |
| TCAATGGTATATCTGGAGAAGCAT    | 0   | 10 | RDR2-sensitive |
| TCAATGTGATAGGATGTAGAGGAG    | 15  | 0  | RDR2-resistant |
| TCAATGTTTACTGTCGCGTGCCT     | 639 | 35 | RDR2-resistant |
| TCAATTGGACCAGGCTGAGGCTAG    | 0   | 78 | RDR2-sensitive |
| TCAATTGGTCCAGGCTGAGGCTAG    | 1   | 18 | RDR2-sensitive |
| TCAATTTCCAGATCTTTGTGCATA    | 179 | 3  | RDR2-resistant |
| TCACAAGTGGAGGACCCTAGACTA    | 51  | 4  | RDR2-resistant |
| TCACACTGCAGAGGCTTGGACGGA    | 0   | 9  | RDR2-sensitive |
| TCACACTGTAGCTGCCGACGGCAC    | 0   | 11 | RDR2-sensitive |
| TCACAGCAGTTCGGCTCGGCTCGG    | 0   | 39 | RDR2-sensitive |
| TCACAGGCTGCAGCAGATGATGAT    | 0   | 9  | RDR2-sensitive |
| TCACATCAAGCGTTTACTTTCAA     | 0   | 9  | RDR2-sensitive |
| TCACATCAGCTGGCTGTGGACGGC    | 0   | 12 | RDR2-sensitive |
| TCACATGCATTGACCAGACCTCAT    | 0   | 9  | RDR2-sensitive |
| TCACATGGATGTCAAGTCGGCGTT    | 27  | 0  | RDR2-resistant |
| TCACATTTATTGTAGTGGTCTGGG    | 41  | 0  | RDR2-resistant |
| TCACATTTGTGCAAAAATGGTCGG    | 0   | 9  | RDR2-sensitive |
| TCACCAAGAGAGCTTACTTTGATA    | 26  | 0  | RDR2-resistant |
| TCACCACTGTAGCGCGTAGAGGAT    | 0   | 30 | RDR2-sensitive |
| TCACCAGATCGCGCCGGACACGGT    | 0   | 9  | RDR2-sensitive |
| TCACCAGGACGTAGGGTGTTACGC    | 0   | 9  | RDR2-sensitive |
| TCACCCATCGTGCCGGGCTGGGCT    | 0   | 10 | RDR2-sensitive |
| TCACCCCCTCTAGGCGACTTTCA     | 0   | 9  | RDR2-sensitive |
| TCACCCGCGGTAAGTACTGACGGATAT | 0   | 25 | RDR2-sensitive |
| TCACCCGCTTCAGCTCACGTCAT     | 4   | 28 | RDR2-sensitive |
| TCACCGAAGGCAGAACCAGGGGAG    | 2   | 18 | RDR2-sensitive |
| TCACCGACTCGGATGTCATCGGCG    | 53  | 16 | RDR2-resistant |
| TCACCGAGCCGAGCCGAGCCTGAT    | 0   | 9  | RDR2-sensitive |
| TCACCGAGTTGGAGTAGGCAGGTC    | 20  | 1  | RDR2-resistant |
| TCACCGGAAGGGCTCGGACGGTCC    | 0   | 9  | RDR2-sensitive |
| TCACCGGACCAGGCTGGACGGCCC    | 0   | 9  | RDR2-sensitive |
| TCACCGGACTGTCCAGTGGTGCAC    | 0   | 13 | RDR2-sensitive |
| TCACCGGACTGTCCGATGGTGCAC    | 0   | 11 | RDR2-sensitive |
| TCACCGGAGGACCTGTAGAGACGG    | 0   | 10 | RDR2-sensitive |
| TCACCGGGCCATGACTGAGGACGT    | 0   | 12 | RDR2-sensitive |
| TCACCGTACCCCTGTAGATGGTAT    | 0   | 76 | RDR2-sensitive |
| TCACCGTCTACTCTGCAACGGCCC    | 0   | 10 | RDR2-sensitive |
| TCACCTAGGTCGTGAGCTCTCGGC    | 49  | 6  | RDR2-resistant |
| TCACCTCACCATCGTCGGAGGCAA    | 1   | 13 | RDR2-sensitive |
| TCACCTGGATCATGTGGAAGACGA    | 1   | 73 | RDR2-sensitive |
| TCACGACATGAGCTTGGGCGGGAC    | 0   | 12 | RDR2-sensitive |
| TCACGACCGTAGGATGGGCGGAC     | 0   | 13 | RDR2-sensitive |
| TCACGAGCTGAGCTGACATCCTAG    | 0   | 30 | RDR2-sensitive |
| TCACGAGCTGAGCTGACATTCTAG    | 0   | 11 | RDR2-sensitive |
| TCACGATTAGTCAGGCTGGTCCGC    | 32  | 0  | RDR2-resistant |

|                           |     |     |                |
|---------------------------|-----|-----|----------------|
| TCACGCAGGAGGAGTCTGGCCGAA  | 0   | 9   | RDR2-sensitive |
| TCACGCCATGAGTCGGCAGCTGAA  | 0   | 9   | RDR2-sensitive |
| TCACGCGGACTTGGCATTGCTTT   | 0   | 27  | RDR2-sensitive |
| TCACGGACCAGGCCGAGCTAGCAC  | 0   | 12  | RDR2-sensitive |
| TCACGGAGAGACGGCTCTAAGATT  | 0   | 33  | RDR2-sensitive |
| TCACGGCTGGTATGAGGAAGACGA  | 1   | 16  | RDR2-sensitive |
| TCACGGCTTGTGGGTAAAGTGAC   | 1   | 15  | RDR2-sensitive |
| TCACGGGACCTCGCAGGTAGACGT  | 0   | 9   | RDR2-sensitive |
| TCACGGGACTGTCCGGTGGACTAG  | 0   | 12  | RDR2-sensitive |
| TCACGGGAGGGAGGACCATCACTA  | 39  | 5   | RDR2-resistant |
| TCACGGGCCACGATGACATGCATC  | 20  | 0   | RDR2-resistant |
| TCACGGGCTCACTGCTGGACCGGT  | 0   | 14  | RDR2-sensitive |
| TCACGGGTACGGGTTTGGGACGGC  | 0   | 17  | RDR2-sensitive |
| TCACGTAACACACGGAGTCGGAGC  | 0   | 20  | RDR2-sensitive |
| TCACGTCCC GCGGATCGGCTCCTC | 101 | 14  | RDR2-resistant |
| TCACGTTTATCGTCGAGTCGTCCG  | 1   | 35  | RDR2-sensitive |
| TCACGTTTGCTGTCGAGTCGTCTGA | 1   | 16  | RDR2-sensitive |
| TCACTAGTCGGTCCGGTTGAGGGT  | 0   | 12  | RDR2-sensitive |
| TCACTAGTCTTTAGAGAACTGCA   | 91  | 8   | RDR2-resistant |
| TCACTATTACCTTTATTGTTGGAC  | 18  | 0   | RDR2-resistant |
| TCACTCATATCGTGCTGTCGTCGT  | 0   | 12  | RDR2-sensitive |
| TCACTCGGCTGACGTACGCGGTTA  | 0   | 16  | RDR2-sensitive |
| TCACTCGGGCAGGGCTGAAGTGGA  | 0   | 9   | RDR2-sensitive |
| TCACTCGGTTGATGGTCAGCTCAG  | 0   | 9   | RDR2-sensitive |
| TCACTCTGGTCCTTGCTGACGGAC  | 0   | 9   | RDR2-sensitive |
| TCACTCTTTGATCGGTTGATGGTG  | 34  | 3   | RDR2-resistant |
| TCACTGAAGACTGCAGCGGGCGAC  | 0   | 9   | RDR2-sensitive |
| TCACTGCATCGATCTGGACGGTCC  | 0   | 13  | RDR2-sensitive |
| TCACTGCGAGAGATGGAACGGAAC  | 0   | 11  | RDR2-sensitive |
| TCACTGCTGAATTCTATCACGGAT  | 28  | 0   | RDR2-resistant |
| TCACTGGACTGTCCGGTGGTGAC   | 1   | 12  | RDR2-sensitive |
| TCACTGTGGATAGGCCGACGGAGAA | 0   | 10  | RDR2-sensitive |
| TCACTGTTACGGCACTTGCTGGC   | 17  | 1   | RDR2-resistant |
| TCACTTGAACATGGTCGACGGCGA  | 0   | 14  | RDR2-sensitive |
| TCACTTGAACCTCCCTTTGAGGCAT | 0   | 11  | RDR2-sensitive |
| TCACTTGGATCATGTGGAAGACGA  | 0   | 11  | RDR2-sensitive |
| TCAGAACGAGCCCGAACCGAGCAT  | 0   | 29  | RDR2-sensitive |
| TCAGAACTCACCTCACGGAGGACA  | 0   | 9   | RDR2-sensitive |
| TCAGAAGTGGATTGATGATGTCAT  | 0   | 15  | RDR2-sensitive |
| TCAGAATTTACAAGGACGTGCTTT  | 38  | 0   | RDR2-resistant |
| TCAGAATTTTGGGCCCTGCGCGGT  | 0   | 10  | RDR2-sensitive |
| TCAGACACCCGCGGGCTTAGACGG  | 0   | 9   | RDR2-sensitive |
| TCAGACAGATTGCGTGCTCCGCGT  | 0   | 22  | RDR2-sensitive |
| TCAGACCGGTCAGTAGAGCGGCCA  | 0   | 11  | RDR2-sensitive |
| TCAGACCGGTCAGTGGAGCGGCCA  | 4   | 29  | RDR2-sensitive |
| TCAGACGGACGCTGGACGCAGGAA  | 0   | 23  | RDR2-sensitive |
| TCAGACTGGACTGGCTGAGTACAT  | 0   | 26  | RDR2-sensitive |
| TCAGACTGGACTGGCTGAGTGCAT  | 2   | 821 | RDR2-sensitive |
| TCAGACTGGACTGGCTGAGTGCCT  | 0   | 29  | RDR2-sensitive |



|                           |    |    |                |
|---------------------------|----|----|----------------|
| TCAGACTGTTTCTTCGAGAGGTGT  | 0  | 9  | RDR2-sensitive |
| TCAGACTTAGCTAGAAGTGGTCAT  | 20 | 0  | RDR2-resistant |
| TCAGACTTAGCTAGAAGTGGTTAT  | 36 | 0  | RDR2-resistant |
| TCAGAGACCGAACCGGCAGAACAC  | 0  | 11 | RDR2-sensitive |
| TCAGAGACGGTTAGATTTTGCTCT  | 33 | 0  | RDR2-resistant |
| TCAGAGCACCAACGTCGACGACAC  | 0  | 22 | RDR2-sensitive |
| TCAGAGGACGCTGCTGAAGAGCAT  | 0  | 13 | RDR2-sensitive |
| TCAGAGTCCAGACGATGTGAGCGC  | 0  | 25 | RDR2-sensitive |
| TCAGAGTTTGGGCCTGTCAGACGG  | 0  | 10 | RDR2-sensitive |
| TCAGATAAGGATAGTTGTATGGAC  | 26 | 0  | RDR2-resistant |
| TCAGATATTTGTGGCTACATAGT   | 23 | 0  | RDR2-resistant |
| TCAGATCCGGGCAAGAAGCGACAG  | 0  | 13 | RDR2-sensitive |
| TCAGATCTGATCAGTGGGGCGCGT  | 0  | 9  | RDR2-sensitive |
| TCAGATGATGCGTACTGATTAGAC  | 1  | 43 | RDR2-sensitive |
| TCAGATTAGAAGTTTGCACGGTTG  | 0  | 15 | RDR2-sensitive |
| TCAGATTAGATTGCGTACCGTGTT  | 33 | 0  | RDR2-resistant |
| TCAGATTTGGATCTGCAGAAGCAT  | 0  | 10 | RDR2-sensitive |
| TCAGCACAAGCTGCAGAGACTGAT  | 1  | 87 | RDR2-sensitive |
| TCAGCAGAATTCACGATTTATGTC  | 14 | 0  | RDR2-resistant |
| TCAGCAGAGACTGTTAAGTTGAAC  | 1  | 12 | RDR2-sensitive |
| TCAGCAGGCTGTAAGGTGTTCCAC  | 0  | 26 | RDR2-sensitive |
| TCAGCAGTAGAGGCGCAAGAAGAT  | 0  | 16 | RDR2-sensitive |
| TCAGCATAGACGGACGCTCGACAA  | 0  | 19 | RDR2-sensitive |
| TCAGCATCGAGGACACATGGCTAA  | 0  | 9  | RDR2-sensitive |
| TCAGCCTGGACCAGTTGAACGGAC  | 0  | 61 | RDR2-sensitive |
| TCAGCCTGTTTGAGCCCAGCACGG  | 0  | 10 | RDR2-sensitive |
| TCAGCCTTGATCAGTCGCGGCCGC  | 0  | 17 | RDR2-sensitive |
| TCAGCCTTGATCTGTGCGGCCGC   | 0  | 11 | RDR2-sensitive |
| TCAGCTCGGCTGCCTAGACGACGG  | 0  | 12 | RDR2-sensitive |
| TCAGCTCGTAGCGACTCGACGGTA  | 0  | 9  | RDR2-sensitive |
| TCAGCTCGTGGACGACAGCGCGGC  | 0  | 11 | RDR2-sensitive |
| TCAGCTGGACCGGATACTACGCAT  | 0  | 29 | RDR2-sensitive |
| TCAGCTGGACGCAGGGGAGATGGA  | 0  | 11 | RDR2-sensitive |
| TCAGCTGTAGACGGATGTTGACGG  | 2  | 15 | RDR2-sensitive |
| TCAGCTGTAGACGGCCGCTAACGG  | 1  | 16 | RDR2-sensitive |
| TCAGCTGTAGACGGCTGCTAACGG  | 0  | 14 | RDR2-sensitive |
| TCAGCTGTTGGAACGGTAAGCTAA  | 0  | 15 | RDR2-sensitive |
| TCAGCTTTTTCTTCGATCTTCGGC  | 15 | 0  | RDR2-resistant |
| TCAGGAACTGACCAGAAACGGCAC  | 0  | 10 | RDR2-sensitive |
| TCAGGACGAAGGAAGCATAGGGCT  | 0  | 9  | RDR2-sensitive |
| TCAGGACGCCAACCAAGATCGCGGT | 0  | 11 | RDR2-sensitive |
| TCAGGACTGAATCCAGGCTAGGAA  | 0  | 22 | RDR2-sensitive |
| TCAGGACTTATTTCCGACGGTTTA  | 0  | 15 | RDR2-sensitive |
| TCAGGAGATAAGTAGTGCCGGAGT  | 0  | 18 | RDR2-sensitive |
| TCAGGAGATGAGCTGACAGCTACT  | 45 | 6  | RDR2-resistant |
| TCAGGAGCGGGCAGGATTCCACGG  | 0  | 14 | RDR2-sensitive |
| TCAGGAGCTGTGAATATAGACTGC  | 0  | 9  | RDR2-sensitive |
| TCAGGAGTAGGACGGTGTTATCGA  | 4  | 22 | RDR2-sensitive |
| TCAGGATCTAGAAAGTGACGGATT  | 0  | 66 | RDR2-sensitive |

|                           |    |    |                |
|---------------------------|----|----|----------------|
| TCAGGATGTAGAAAGTGACGGTTT  | 0  | 9  | RDR2-sensitive |
| TCAGGATGTAGTTTTGCCGGATGA  | 48 | 0  | RDR2-resistant |
| TCAGGCCATGAGGAGATGAGCATC  | 81 | 1  | RDR2-resistant |
| TCAGGCGAAGCTCTCTGAGGACGA  | 2  | 18 | RDR2-sensitive |
| TCAGGCTCTGCAGACGATACCCAT  | 11 | 62 | RDR2-sensitive |
| TCAGGCTGTACGCGGACAGATGGA  | 0  | 12 | RDR2-sensitive |
| TCAGGGCAGCCTGTAGCTACGGAC  | 0  | 19 | RDR2-sensitive |
| TCAGGGCAGTAGGCCAGTAGATGT  | 0  | 16 | RDR2-sensitive |
| TCAGGTAGGTGTAGTTGGGGACGG  | 7  | 23 | RDR2-sensitive |
| TCAGGTCGGTCAGTGGAGCGGCCA  | 0  | 43 | RDR2-sensitive |
| TCAGGTCGTAAAGCTCCATCGGCT  | 34 | 2  | RDR2-resistant |
| TCAGGTGCGGCTTCGACGATTTAA  | 0  | 12 | RDR2-sensitive |
| TCAGGTGCTCTGAGTAAGCTGGAC  | 36 | 1  | RDR2-resistant |
| TCAGGTGGATGATGAGCTAGACGG  | 0  | 15 | RDR2-sensitive |
| TCAGGTTTGGATCGGATCGAGCAA  | 0  | 9  | RDR2-sensitive |
| TCAGTAGACCGACATGACGTGCAT  | 0  | 10 | RDR2-sensitive |
| TCAGTAGGACCTTGGTGGAGGTAT  | 0  | 17 | RDR2-sensitive |
| TCAGTATCATGCAGACTTCGATAT  | 0  | 17 | RDR2-sensitive |
| TCAGTATGGATTTTATCATCGGAC  | 15 | 0  | RDR2-resistant |
| TCAGTATGTCTGATCAGTACGCAT  | 0  | 21 | RDR2-sensitive |
| TCAGTCAGGCTGCATATCCCACGT  | 0  | 23 | RDR2-sensitive |
| TCAGTCATGTCAGTAGGTCGAGTC  | 18 | 0  | RDR2-resistant |
| TCAGTCGTGTAGAAGGAGGGCGTG  | 19 | 0  | RDR2-resistant |
| TCAGTCGTTGCTGTTCGATGGGCAC | 0  | 20 | RDR2-sensitive |
| TCAGTCTCAACGGTCGATCGTCGT  | 78 | 2  | RDR2-resistant |
| TCAGTGACGTGGACACGGTTAGCC  | 21 | 0  | RDR2-resistant |
| TCAGTGGATCGTGGCAGCAAGGCC  | 17 | 1  | RDR2-resistant |
| TCAGTGTGGAAGGTGTTGATGGAC  | 25 | 0  | RDR2-resistant |
| TCAGTTATAGTTTGTGTTGATGGTA | 23 | 0  | RDR2-resistant |
| TCAGTTATCGTCGTTTTGCCATA   | 58 | 16 | RDR2-resistant |
| TCAGTTGGGTGCCTAGAGTTGCAT  | 49 | 2  | RDR2-resistant |
| TCAGTTGTGAATGGATCGACGCTC  | 0  | 9  | RDR2-sensitive |
| TCAGTTTACTGTAGTGTGAGGTGT  | 0  | 9  | RDR2-sensitive |
| TCAGTTTCAACGGTCGTCATGCGT  | 0  | 10 | RDR2-sensitive |
| TCATAATATTTTAGCAAGTCGGCA  | 41 | 1  | RDR2-resistant |
| TCATAATTCGGGCTAGTTTGGCAG  | 0  | 29 | RDR2-sensitive |
| TCATAGAGACTCAGGATCATCGGG  | 79 | 8  | RDR2-resistant |
| TCATAGCGACACTGTAGTGCGGAC  | 0  | 12 | RDR2-sensitive |
| TCATAGTGGATTTTGTGTTGTGCA  | 39 | 1  | RDR2-resistant |
| TCATATATCGTACCGGGCCGGGCC  | 0  | 9  | RDR2-sensitive |
| TCATATATTCAATGAAAGCGGACA  | 19 | 0  | RDR2-resistant |
| TCATATCGGGTAAACTCGTCGGG   | 0  | 13 | RDR2-sensitive |
| TCATATTAGATGTGTCGGCGTGTG  | 15 | 0  | RDR2-resistant |
| TCATCAACAACGGGATATGGTAGC  | 0  | 13 | RDR2-sensitive |
| TCATCACATGGACGTCAAGTCGGC  | 17 | 0  | RDR2-resistant |
| TCATCAGATGTGTTGACTGGGCAT  | 0  | 12 | RDR2-sensitive |
| TCATCAGTCCAGCAGGCTCCGCAT  | 0  | 36 | RDR2-sensitive |
| TCATCAGTCCAGCAGTCTCCGCAT  | 0  | 14 | RDR2-sensitive |
| TCATCATCGGACAGTGTGGATGGA  | 16 | 0  | RDR2-resistant |

|                           |     |    |                |
|---------------------------|-----|----|----------------|
| TCATCATCGTACATCTTCGGCATC  | 1   | 26 | RDR2-sensitive |
| TCATCCCGTCAACAGTAGAGGCGC  | 0   | 9  | RDR2-sensitive |
| TCATCCGGACTCCAAACAAGGCAA  | 0   | 18 | RDR2-sensitive |
| TCATCGACCGGTATACCTTTTGAT  | 86  | 34 | RDR2-resistant |
| TCATCGAGCCAGGCGTCCGAACGT  | 0   | 14 | RDR2-sensitive |
| TCATCGAGCTGGTGGATCAGGCCA  | 55  | 0  | RDR2-resistant |
| TCATCGCAGAAGGCCAGGTAGAAC  | 0   | 9  | RDR2-sensitive |
| TCATCGGACTGTCCGGCGAGTCAT  | 0   | 21 | RDR2-sensitive |
| TCATCGGAGTGTTGGTCAGTCGGT  | 0   | 10 | RDR2-sensitive |
| TCATCGGGTGACGGATATGGATAG  | 0   | 12 | RDR2-sensitive |
| TCATCTGTGTACGTCCGGACGGTC  | 0   | 11 | RDR2-sensitive |
| TCATCTTCATCGTCTGCAGGCATA  | 70  | 4  | RDR2-resistant |
| TCATCTTCTACCACTGTTGGCATC  | 33  | 2  | RDR2-resistant |
| TCATCTTTGAGTTCTGACGGTGT   | 0   | 18 | RDR2-sensitive |
| TCATGACCTGGACGCAAGAGCGAC  | 0   | 11 | RDR2-sensitive |
| TCATGACGAGTACGACGAGCAGAA  | 25  | 0  | RDR2-resistant |
| TCATGACTAGATGTAGAGACGTTT  | 0   | 9  | RDR2-sensitive |
| TCATGACTGGTGGCCGGACGGTCC  | 0   | 17 | RDR2-sensitive |
| TCATGACTTGGTTCGATGACGAGCT | 42  | 6  | RDR2-resistant |
| TCATGATCCAGTGAAGCGTGAAC   | 21  | 0  | RDR2-resistant |
| TCATGATGAATTTTGACCTTGCAT  | 21  | 1  | RDR2-resistant |
| TCATGCCTTTGTAGATCCGAGCGG  | 0   | 20 | RDR2-sensitive |
| TCATGCGTGCAACGGCATGGTCCG  | 0   | 9  | RDR2-sensitive |
| TCATGGACCTCGCGGACGAACGGC  | 74  | 23 | RDR2-resistant |
| TCATGGACTGTTCTAGAAGAAGGT  | 71  | 0  | RDR2-resistant |
| TCATGGCTAGACTGGAGACGACAA  | 0   | 9  | RDR2-sensitive |
| TCATGGCTAGACTGGAGGCGACGA  | 2   | 29 | RDR2-sensitive |
| TCATGTCAGCTGTGGAAACGGTAA  | 3   | 54 | RDR2-sensitive |
| TCATGTCAGCTGTTGAAACGGTAA  | 0   | 10 | RDR2-sensitive |
| TCATGTCATATTAGATGTGTCCGC  | 158 | 0  | RDR2-resistant |
| TCATGTCGCATCGCACGGACACTC  | 0   | 10 | RDR2-sensitive |
| TCATGTCTCTATGGATCGGGAGTT  | 17  | 0  | RDR2-resistant |
| TCATGTGTACCACTCTGGGCCGGC  | 0   | 30 | RDR2-sensitive |
| TCATGTTGGCTGTGGAAACGGTAA  | 0   | 27 | RDR2-sensitive |
| TCATGTTGTAGAGGCTACAGTTAT  | 0   | 10 | RDR2-sensitive |
| TCATTAGAGCATATCGGTGGAAGA  | 17  | 0  | RDR2-resistant |
| TCATTAGATCTAGATCGGATACAC  | 0   | 12 | RDR2-sensitive |
| TCATTAGATCTAGATCGGATGCAC  | 0   | 45 | RDR2-sensitive |
| TCATTAGGATTACGTGCGGAGGAA  | 0   | 13 | RDR2-sensitive |
| TCATTCAATCAACTGTGGGGCATA  | 23  | 2  | RDR2-resistant |
| TCATTCTGTTTGTGGTTCTTTTCGG | 44  | 1  | RDR2-resistant |
| TCATTGAATATGGGTACGGTAGAA  | 0   | 15 | RDR2-sensitive |
| TCATTGACCGGTATGCTTTTTGAT  | 33  | 7  | RDR2-resistant |
| TCATTGACGACGGTGCTGATGGCT  | 85  | 3  | RDR2-resistant |
| TCATTGATTGTGACTTGATGGTAC  | 0   | 17 | RDR2-sensitive |
| TCATTGGACTGGCCCGGGCACGAC  | 0   | 9  | RDR2-sensitive |
| TCATTGGGCAGAGACTTCATGATC  | 34  | 1  | RDR2-resistant |
| TCATTGTCAAGCTTGGAGGCGTCG  | 23  | 1  | RDR2-resistant |
| TCATTGTTGAATGGGTTGAAGGAC  | 0   | 13 | RDR2-sensitive |

|                           |     |    |                |
|---------------------------|-----|----|----------------|
| TCATTTAGAGGAAGGAGAAGTCGT  | 64  | 6  | RDR2-resistant |
| TCATTTGCCGGTACTGTGAGGCC   | 15  | 0  | RDR2-resistant |
| TCATTTTAGTTATTTGGTCCGGGC  | 15  | 0  | RDR2-resistant |
| TCATTTTCTAAGTTGTGCTCGGCA  | 22  | 2  | RDR2-resistant |
| TCATTTTGTGAGCAGCTGGACGTG  | 18  | 0  | RDR2-resistant |
| TCATTTTCTGAGGTAGTACGTAT   | 36  | 0  | RDR2-resistant |
| TCATTTTGGACCCTTTGCTCGGC   | 2   | 16 | RDR2-sensitive |
| TCCAAAACCTGGATGGAGCAGCT   | 0   | 10 | RDR2-sensitive |
| TCCAAACACGTAGAGGGCTAGAGC  | 0   | 25 | RDR2-sensitive |
| TCCAAACAGCTGCAACAGTGTCGG  | 0   | 21 | RDR2-sensitive |
| TCCAAACAGTATGGGTCGTCCGGT  | 0   | 9  | RDR2-sensitive |
| TCCAAACGGAGGTAGCAGTAGCGT  | 0   | 10 | RDR2-sensitive |
| TCCAAAGTCGGGCGGGCACGGAT   | 0   | 22 | RDR2-sensitive |
| TCCAACCCAAACGGCGAAACTCAC  | 0   | 16 | RDR2-sensitive |
| TCCAACGCGGTCGTGACGGCGGT   | 0   | 12 | RDR2-sensitive |
| TCCAACGGAGTAGAGCAGAACGGT  | 0   | 27 | RDR2-sensitive |
| TCCAACGGAGTAGAGCGAAGTGCC  | 0   | 10 | RDR2-sensitive |
| TCCAACGGAGTAGAGCGGAGTGCC  | 0   | 22 | RDR2-sensitive |
| TCCAACGGCACTGATGACGTGGCA  | 0   | 14 | RDR2-sensitive |
| TCCAACGGGCGACTGACGTGGCAC  | 0   | 14 | RDR2-sensitive |
| TCCAACGGTCGAACCCTAACGGTT  | 0   | 10 | RDR2-sensitive |
| TCCAACGGTGCTGTGTGACGGGGT  | 101 | 2  | RDR2-resistant |
| TCCAACGCTGTGCTGTATGACGG   | 0   | 10 | RDR2-sensitive |
| TCCAACGGTCTTGTAGCGGTCGA   | 0   | 11 | RDR2-sensitive |
| TCCAACGTTGGGGGCTTCAGACATT | 16  | 0  | RDR2-resistant |
| TCCAAGAATGTGATCTATGGCAAG  | 19  | 0  | RDR2-resistant |
| TCCAAGACCAACCTCGGACGGTAG  | 0   | 9  | RDR2-sensitive |
| TCCAAGCGCGGGCGTGGATCTGGC  | 25  | 4  | RDR2-resistant |
| TCCAAGGTCGGATACGGAAGGCAA  | 0   | 9  | RDR2-sensitive |
| TCCAAGGTTTCGTAGAGCAGGAGA  | 0   | 14 | RDR2-sensitive |
| TCCAAGGTTTCGTAGAGCAGGAGG  | 1   | 12 | RDR2-sensitive |
| TCCAAGTGGATTATGTGAACAGGT  | 0   | 10 | RDR2-sensitive |
| TCCAAGTGGGAACCTCCGCGTCCGC | 0   | 12 | RDR2-sensitive |
| TCCAAGTGGGCAGTGAACGAGCGT  | 0   | 14 | RDR2-sensitive |
| TCCAATCGGTTGGGGCATGTACAA  | 0   | 13 | RDR2-sensitive |
| TCCAATGGACTTAGACGGTGCTAC  | 0   | 12 | RDR2-sensitive |
| TCCACAATCTGAGACGTGCGGCAC  | 0   | 14 | RDR2-sensitive |
| TCCACACGATACTGAGGACGGTGC  | 0   | 9  | RDR2-sensitive |
| TCCACAGGAACGCTGCGAATCCGA  | 0   | 12 | RDR2-sensitive |
| TCCACAGTTCGGACTGTTGTCAT   | 1   | 70 | RDR2-sensitive |
| TCCACATCTTAGGACTTAGGGCGG  | 0   | 15 | RDR2-sensitive |
| TCCACATGTAGGTGAACGAGACGA  | 0   | 12 | RDR2-sensitive |
| TCCACATGTCGGAGACGGTCTCGT  | 0   | 14 | RDR2-sensitive |
| TCCACCACGCGGGGAAGACGTCGT  | 0   | 22 | RDR2-sensitive |
| TCCACCACGCGGGGTAGACGTCGT  | 0   | 12 | RDR2-sensitive |
| TCCACCTGGGCCAGTGACTCGGAC  | 0   | 14 | RDR2-sensitive |
| TCCACGAACGTTTGCAGGGAACAT  | 0   | 18 | RDR2-sensitive |
| TCCACGACACAAGGCTGGACAGGT  | 0   | 10 | RDR2-sensitive |
| TCCACGACCAAGGGCTGGACGGTC  | 0   | 10 | RDR2-sensitive |

|                           |     |     |                |
|---------------------------|-----|-----|----------------|
| TCCACGACTTGGACACGGGAGCGG  | 0   | 12  | RDR2-sensitive |
| TCCACGAGAGCTGTTGGAGAACGC  | 0   | 9   | RDR2-sensitive |
| TCCACGCGGACCGTCTGGAGGCAC  | 0   | 15  | RDR2-sensitive |
| TCCACGCTGACTGAGACAAGACGT  | 0   | 9   | RDR2-sensitive |
| TCCACGGCACAAGATCGGACGGTC  | 0   | 11  | RDR2-sensitive |
| TCCACGGCTAGGAACCAGACGGTC  | 0   | 14  | RDR2-sensitive |
| TCCACGGCTGAAGCTCGGACGGTC  | 0   | 12  | RDR2-sensitive |
| TCCACGGTCCGGACTGTCCGCGGT  | 0   | 27  | RDR2-sensitive |
| TCCACGTACGAGGATCGAACGGTC  | 0   | 9   | RDR2-sensitive |
| TCCACTGTATGGCTTCGGCGGCAA  | 106 | 9   | RDR2-resistant |
| TCCAGAACCTGAACCAGTGGGTAC  | 0   | 22  | RDR2-sensitive |
| TCCAGAACTATTGGGGACCTTCGG  | 0   | 9   | RDR2-sensitive |
| TCCAGAACTCCTGATCCATAGAGA  | 28  | 0   | RDR2-resistant |
| TCCAGAACTCTGCAGGTAGAGCTG  | 0   | 16  | RDR2-sensitive |
| TCCAGACTAGAGCACCAGGAAGAC  | 24  | 0   | RDR2-resistant |
| TCCAGAGGGTGGCATAGAACTGAG  | 114 | 198 | RDR2-sensitive |
| TCCAGATACGAACGTTGGACAAAT  | 15  | 0   | RDR2-resistant |
| TCCAGATGGGTTCGGCGGAGACGG  | 1   | 16  | RDR2-sensitive |
| TCCAGCAAGGGCCTGTAAACGGTT  | 0   | 19  | RDR2-sensitive |
| TCCAGCAGCGTCTCTAAACGGTT   | 3   | 16  | RDR2-sensitive |
| TCCAGCGGGGTACAGTGTTCGAGCA | 14  | 0   | RDR2-resistant |
| TCCAGGACGATAAGCGCGTAAGGC  | 0   | 9   | RDR2-sensitive |
| TCCAGGACGATAAGCGTAAGACAA  | 0   | 13  | RDR2-sensitive |
| TCCAGGACGTAGGGTGTACGCAT   | 0   | 10  | RDR2-sensitive |
| TCCAGGATAAGACGATGCGAGCAA  | 0   | 11  | RDR2-sensitive |
| TCCAGGGCTGTACCCGGACGGATC  | 1   | 13  | RDR2-sensitive |
| TCCAGGTCACGCGGAGAACAGCAT  | 0   | 31  | RDR2-sensitive |
| TCCAGTACATGCAGAGCCTTGCGG  | 1   | 30  | RDR2-sensitive |
| TCCAGTCATCGGCCTACGACACAT  | 0   | 9   | RDR2-sensitive |
| TCCAGTCGACAGAGCCGAAGTGAC  | 0   | 9   | RDR2-sensitive |
| TCCAGTCGCTGCTAGAGGACGTGT  | 0   | 56  | RDR2-sensitive |
| TCCAGTGCACAGGCTGCAGCAGGC  | 0   | 11  | RDR2-sensitive |
| TCCAGTGCACAGGCTGTAGCAGGC  | 5   | 48  | RDR2-sensitive |
| TCCAGTGGAGCACCCGACAACCAA  | 0   | 21  | RDR2-sensitive |
| TCCATAGTGGACGCGTAGAACGGC  | 2   | 50  | RDR2-sensitive |
| TCCATATCCTGCGGGCTAGTACGG  | 1   | 16  | RDR2-sensitive |
| TCCATATTATTTGTGTCGGATCGT  | 0   | 33  | RDR2-sensitive |
| TCCATCAGACTGTGTTCAACGGTG  | 0   | 21  | RDR2-sensitive |
| TCCATCCCGGATTCTAGGAACGGA  | 0   | 15  | RDR2-sensitive |
| TCCATCTACTTATGGGCATCGGAC  | 25  | 0   | RDR2-resistant |
| TCCATCTCGGACTCGCGACGGTGT  | 1   | 49  | RDR2-sensitive |
| TCCATCTCGTGACTCTGCGCGCAC  | 1   | 32  | RDR2-sensitive |
| TCCATCTTGGATATGTGACGGTGG  | 0   | 12  | RDR2-sensitive |
| TCCATGACGACGACGGCTCTCAGC  | 1   | 15  | RDR2-sensitive |
| TCCATGCGTGTGTAGAAGCGACGG  | 0   | 27  | RDR2-sensitive |
| TCCATGGGATTGCGGCATTTTCT   | 40  | 0   | RDR2-resistant |
| TCCATGGTATAGGACTGGACGGTC  | 0   | 22  | RDR2-sensitive |
| TCCATGTTTAGGCTGTATTGGCGT  | 1   | 145 | RDR2-sensitive |
| TCCATTAGTGGATTGGTGGGAGGA  | 37  | 0   | RDR2-resistant |

|                           |     |    |                |
|---------------------------|-----|----|----------------|
| TCCATTCTGCTGAGCGCGGACGGT  | 0   | 15 | RDR2-sensitive |
| TCCATTGCCTGTAGAGCGTGTCCGG | 0   | 12 | RDR2-sensitive |
| TCCATTGTCGTCTAGTCCGGTTAG  | 33  | 2  | RDR2-resistant |
| TCCCAACAGGAGCTGTGAACACGG  | 0   | 13 | RDR2-sensitive |
| TCCCAACGGGCGGCGTGCTGAATC  | 126 | 20 | RDR2-resistant |
| TCCCAAGAATCGGGCGAAGACGAA  | 0   | 26 | RDR2-sensitive |
| TCCCAAGAATCGGGTGAAGACGAA  | 3   | 46 | RDR2-sensitive |
| TCCCAAGAGTCGGGTGAAGACGGA  | 2   | 17 | RDR2-sensitive |
| TCCCAAGGATCGGATGAAGACGAA  | 0   | 30 | RDR2-sensitive |
| TCCCAGCACTAGTGGCACCGGACA  | 0   | 12 | RDR2-sensitive |
| TCCCAGGAACTCTTGCAGGGGCAT  | 0   | 36 | RDR2-sensitive |
| TCCCAGGACACCCACCCAGGACGC  | 0   | 9  | RDR2-sensitive |
| TCCCAGTCGGAGGGTGGCGCGCAT  | 0   | 16 | RDR2-sensitive |
| TCCCAGTTTCGCGGATGACAGGCT  | 0   | 10 | RDR2-sensitive |
| TCCCATCCGGAACGGCGAAGGCAC  | 0   | 13 | RDR2-sensitive |
| TCCCATGCGGTGACGGACATGAC   | 0   | 15 | RDR2-sensitive |
| TCCCATGCGGTGACGGACATGGC   | 0   | 14 | RDR2-sensitive |
| TCCCATGGCAGTGTAGGACGGAGG  | 0   | 17 | RDR2-sensitive |
| TCCCATGGCAGTGTAGGACGGAGT  | 0   | 30 | RDR2-sensitive |
| TCCCATGTCGTCCCCTGTTACGGT  | 0   | 48 | RDR2-sensitive |
| TCCCCAATCCGGCTGTATACGCAT  | 0   | 15 | RDR2-sensitive |
| TCCCCACACGTTGCGGGCTGTGAG  | 39  | 0  | RDR2-resistant |
| TCCCCACAGCTAGATTCTCGGAAA  | 0   | 21 | RDR2-sensitive |
| TCCCCCCGTCAGCAGTAGAGACGC  | 0   | 34 | RDR2-sensitive |
| TCCCCCCGTCAGCAGTAGAGGCAC  | 3   | 35 | RDR2-sensitive |
| TCCCCCCGTCAGCAGTAGAGGCGC  | 6   | 71 | RDR2-sensitive |
| TCCCCGACGAGTAAATGAGGATGC  | 0   | 14 | RDR2-sensitive |
| TCCCCGATCCAGAGGACGAGCGGC  | 0   | 10 | RDR2-sensitive |
| TCCCCGGATCCACTAGAAGACGAA  | 1   | 27 | RDR2-sensitive |
| TCCCCTAAATGTAGCGAACGGTGA  | 0   | 14 | RDR2-sensitive |
| TCCCCTATCTGAGGTGACCCGGAC  | 50  | 3  | RDR2-resistant |
| TCCCCTGCGTAGGATGAGACGAGC  | 0   | 19 | RDR2-sensitive |
| TCCCCTGTGTACTGTAATGGGCTA  | 0   | 9  | RDR2-sensitive |
| TCCCGAAACAGAAGTACTCGCAT   | 0   | 16 | RDR2-sensitive |
| TCCCGAACAGCTTGAGAACGCCAT  | 0   | 17 | RDR2-sensitive |
| TCCCGACGACTGTACAGATTACGC  | 0   | 10 | RDR2-sensitive |
| TCCCGACGACTGTACAGATTGCGC  | 0   | 13 | RDR2-sensitive |
| TCCCGACGACTGTATAGATTGCGT  | 0   | 25 | RDR2-sensitive |
| TCCCGACTTTTGCAAATTTGGCAT  | 0   | 19 | RDR2-sensitive |
| TCCCGAGACACTGAGACGACGTAA  | 0   | 14 | RDR2-sensitive |
| TCCCGAGCCGGCTAGACGACGCAA  | 0   | 16 | RDR2-sensitive |
| TCCCGAGGACTGATCGGTTACCAT  | 0   | 18 | RDR2-sensitive |
| TCCCGATAACGTCTCGGTCGTCGT  | 0   | 23 | RDR2-sensitive |
| TCCCGATCTCAGGTCTGTTGTCCG  | 1   | 15 | RDR2-sensitive |
| TCCCGCGAGCGGGCTGCGAGGGCA  | 84  | 0  | RDR2-resistant |
| TCCCGCGCTCGGTGGACCTTCGGT  | 494 | 70 | RDR2-resistant |
| TCCCGGAAGACGGCGAAGTCCGCT  | 1   | 22 | RDR2-sensitive |
| TCCCGGACCTGTAGAATACCGGAT  | 0   | 10 | RDR2-sensitive |
| TCCCGGACTGGACCAGGCAACCAA  | 0   | 32 | RDR2-sensitive |

|                           |    |     |                |
|---------------------------|----|-----|----------------|
| TCCCGGAGAGTGCAGGATCGTCGA  | 0  | 9   | RDR2-sensitive |
| TCCCGGATGAGACGTGACAGGTGA  | 1  | 14  | RDR2-sensitive |
| TCCCGGGCTGAAACGACGAGGTTA  | 0  | 16  | RDR2-sensitive |
| TCCCGTACTCACTGACAGACGAT   | 0  | 9   | RDR2-sensitive |
| TCCCGGTGCAGGATCTAGAAGACG  | 5  | 32  | RDR2-sensitive |
| TCCCGTCAACAGTAGAGGCGCAAG  | 0  | 10  | RDR2-sensitive |
| TCCCGTCAGCAGTAGAGACGCAAG  | 1  | 40  | RDR2-sensitive |
| TCCCGTCAGCAGTAGAGACGCGAG  | 0  | 10  | RDR2-sensitive |
| TCCCGTCAGCAGTAGAGGCGCAAG  | 6  | 248 | RDR2-sensitive |
| TCCCGTCAGCAGTAGAGGCGCGAG  | 1  | 29  | RDR2-sensitive |
| TCCCGTCGGCTTGGTCAGGTGGCC  | 16 | 0   | RDR2-resistant |
| TCCCGTGATGGATTGGAACGTCGT  | 0  | 14  | RDR2-sensitive |
| TCCCTACGCTGAGCCGGACGGTCC  | 0  | 9   | RDR2-sensitive |
| TCCCTAGGACCGTAGCGTTAGCAT  | 0  | 13  | RDR2-sensitive |
| TCCCTAGTCATCGGTACTCGGCAT  | 0  | 10  | RDR2-sensitive |
| TCCCTCACCTACCAGTAGACTGT   | 0  | 12  | RDR2-sensitive |
| TCCCTCCAGGTGGGAGCGGTCTGTC | 15 | 0   | RDR2-resistant |
| TCCCTCCCGTCAGCAGTAGAGACG  | 0  | 15  | RDR2-sensitive |
| TCCCTCCCGTCAGCAGTAGAGGCA  | 0  | 21  | RDR2-sensitive |
| TCCCTCCCGTCAGCAGTAGAGGCG  | 2  | 171 | RDR2-sensitive |
| TCCCTCGAGGACGACGCTGCGGAC  | 0  | 39  | RDR2-sensitive |
| TCCCTGAACTCGGCTCGAACGGCG  | 15 | 0   | RDR2-resistant |
| TCCCTGACGGACTGCGGAGGCGAC  | 0  | 19  | RDR2-sensitive |
| TCCCTGCCTGACGGTTCGGACGGTC | 0  | 13  | RDR2-sensitive |
| TCCCTGCGACGGGTTTCGGACGGTC | 0  | 24  | RDR2-sensitive |
| TCCCTGGACCAGCGGTACTTACTC  | 0  | 10  | RDR2-sensitive |
| TCCCTGGACCGACGAGTAAATTGT  | 0  | 10  | RDR2-sensitive |
| TCCCTGGATCTAGCGGACGGCTGT  | 0  | 16  | RDR2-sensitive |
| TCCCTGGATGTAGTTGGTAGACGG  | 0  | 90  | RDR2-sensitive |
| TCCCTGGATTGTAGCTTCGGTATA  | 0  | 31  | RDR2-sensitive |
| TCCCTGGCGGACTGCGGAGGCGAC  | 1  | 13  | RDR2-sensitive |
| TCCCTGGTCAGACGCGGACGGTCC  | 0  | 10  | RDR2-sensitive |
| TCCCTGTAGTAGTGACGGGCACTC  | 0  | 14  | RDR2-sensitive |
| TCCCTGTCTGACGAGCTGGACGGT  | 0  | 15  | RDR2-sensitive |
| TCCCTTATGAAACAGCTGGGCATA  | 0  | 13  | RDR2-sensitive |
| TCCCTTCCCTCCCGTCAGCAGTAG  | 0  | 10  | RDR2-sensitive |
| TCCCTTCCGTCAGCAGTAGAGGCG  | 0  | 24  | RDR2-sensitive |
| TCCGAAACGGTAGGAGGGGCTCGA  | 0  | 13  | RDR2-sensitive |
| TCCGAACCCGGCACGGTAGAATAA  | 3  | 392 | RDR2-sensitive |
| TCCGAACCCGGCATGGTAGAATAA  | 0  | 18  | RDR2-sensitive |
| TCCGAACCGAAGTCAGATGGACAC  | 0  | 9   | RDR2-sensitive |
| TCCGAACCGCCTGTGGAGACGACA  | 0  | 12  | RDR2-sensitive |
| TCCGAACCGCGAACGTGGACCGTC  | 0  | 11  | RDR2-sensitive |
| TCCGAACCTGGCACGGTAGAATAA  | 0  | 22  | RDR2-sensitive |
| TCCGAACGAGCCTGAGCCGAGCCT  | 0  | 23  | RDR2-sensitive |
| TCCGAACGGTCACGTAGAAAGCAT  | 0  | 34  | RDR2-sensitive |
| TCCGAACTCGAACCGGCTCGTGAG  | 0  | 9   | RDR2-sensitive |
| TCCGAAGCAGAATCGGGTTCGGCCT | 0  | 16  | RDR2-sensitive |
| TCCGAAGCTGTACTATCCGGGTAT  | 2  | 22  | RDR2-sensitive |

|                            |    |     |                |
|----------------------------|----|-----|----------------|
| TCCGAAGCTGTATTATCCGGGTAT   | 0  | 10  | RDR2-sensitive |
| TCCGAAGGACGACGTCAGCACCAC   | 0  | 11  | RDR2-sensitive |
| TCCGAAGGTAGAAGTTTGCCGGAA   | 40 | 5   | RDR2-resistant |
| TCCGAAGTCGGGCAGGCATGGATT   | 59 | 4   | RDR2-resistant |
| TCCGAATGGGCTGTCTGATAGGCT   | 0  | 94  | RDR2-sensitive |
| TCCGAATTGTGATCGCGCGGACAA   | 0  | 38  | RDR2-sensitive |
| TCCGACAGACTAGCTATATGACTC   | 0  | 11  | RDR2-sensitive |
| TCCGACATCGGGCGACGGATCCGG   | 0  | 16  | RDR2-sensitive |
| TCCGACCACTTCGCACGTAGACAG   | 0  | 22  | RDR2-sensitive |
| TCCGACCGTCGACGGCCTCCTCAG   | 0  | 17  | RDR2-sensitive |
| TCCGACCTGTAGCGAGATGGGACA   | 0  | 17  | RDR2-sensitive |
| TCCGACGACGAGGACGCCGCCAAC   | 77 | 19  | RDR2-resistant |
| TCCGACGAGGACGCCACCAACATC   | 19 | 1   | RDR2-resistant |
| TCCGACGCTGAGAGGACACCACAG   | 0  | 9   | RDR2-sensitive |
| TCCGACGATAAACGAGGACGGAT    | 0  | 11  | RDR2-sensitive |
| TCCGACGGCCTACACTGTTTCCAA   | 0  | 9   | RDR2-sensitive |
| TCCGACGGGCTAACTTACGACGGT   | 1  | 31  | RDR2-sensitive |
| TCCGACGGGTAGACGAGAAAGCAT   | 0  | 10  | RDR2-sensitive |
| TCCGACGGTAGGAGCGTAGGCCCT   | 24 | 0   | RDR2-resistant |
| TCCGACTACGACGAGCAAGCCCGA   | 1  | 12  | RDR2-sensitive |
| TCCGACTACGACGAGCAAGCCTGA   | 0  | 9   | RDR2-sensitive |
| TCCGACTACTGCATATGGCTCGAA   | 0  | 11  | RDR2-sensitive |
| TCCGACTCTGTAGCCAAACGGTGT   | 0  | 10  | RDR2-sensitive |
| TCCGACTGCGGCTGCGGCTTCTAC   | 0  | 31  | RDR2-sensitive |
| TCCGACTGCTGTGCCACTCGACGG   | 0  | 18  | RDR2-sensitive |
| TCCGACTGGTGTTCGCGGCGACAA   | 0  | 11  | RDR2-sensitive |
| TCCGACTGTTCCGACGGAAGCCGC   | 3  | 29  | RDR2-sensitive |
| TCCGACTGTTCCGACGGTAGCCGC   | 14 | 70  | RDR2-sensitive |
| TCCGACTGTTCCGACGGTAGCCGT   | 3  | 16  | RDR2-sensitive |
| TCCGACTGTTCCGATGGAAGCCGC   | 4  | 17  | RDR2-sensitive |
| TCCGACTTCGAGCGCGATGGATAG   | 0  | 21  | RDR2-sensitive |
| TCCGAGACCAACCCTGGACGGAAA   | 0  | 9   | RDR2-sensitive |
| TCCGAGACCAGCGGGAACGATCTT   | 0  | 17  | RDR2-sensitive |
| TCCGAGACCAGCGGGAGCGATCTT   | 0  | 10  | RDR2-sensitive |
| TCCGAGCACGGCTAGACCCGACAC   | 0  | 10  | RDR2-sensitive |
| TCCGAGCCCGGCACGATAGAATAA   | 0  | 13  | RDR2-sensitive |
| TCCGAGCCCGGCACGGTAGAATAA   | 0  | 127 | RDR2-sensitive |
| TCCGAGCCGATTCTTGGTGTCGTCGT | 0  | 13  | RDR2-sensitive |
| TCCGAGCTCGGCGCCATAGATCTT   | 0  | 10  | RDR2-sensitive |
| TCCGAGCTTGACAGTACATCGGC    | 14 | 0   | RDR2-resistant |
| TCCGAGGAATAACAGCGTAGACGG   | 0  | 21  | RDR2-sensitive |
| TCCGAGGACCGAGGACATCGACGG   | 0  | 17  | RDR2-sensitive |
| TCCGAGGCTTTTGCCGATTGTCCG   | 0  | 9   | RDR2-sensitive |
| TCCGAGTACGGGCTGAACGGGC     | 1  | 64  | RDR2-sensitive |
| TCCGAGTTGGAAGTATGCAGGAGC   | 0  | 15  | RDR2-sensitive |
| TCCGATACCAGCTGTGACGGAACC   | 2  | 14  | RDR2-sensitive |
| TCCGATACCAGCTGTGGCAGAACC   | 4  | 20  | RDR2-sensitive |
| TCCGATACGTTGAGGATGGAACAT   | 0  | 10  | RDR2-sensitive |
| TCCGATCCAGGCAATTTGTGCGAGC  | 0  | 11  | RDR2-sensitive |



|                           |    |     |                |
|---------------------------|----|-----|----------------|
| TCCGATCCGAGATAAAGTGGGCAT  | 0  | 70  | RDR2-sensitive |
| TCCGATCGAAGTTGTGGGCGAGGC  | 1  | 23  | RDR2-sensitive |
| TCCGATCTGGGCGGCGTATCCTGC  | 0  | 12  | RDR2-sensitive |
| TCCGATCTTCCCGGGATGTCGAGT  | 0  | 26  | RDR2-sensitive |
| TCCGATGAAGTTGGATTAAGGTT   | 46 | 12  | RDR2-resistant |
| TCCGATGCCCTACTGTAGACGGTC  | 0  | 25  | RDR2-sensitive |
| TCCGATGGGAACCGACGGACACAC  | 4  | 25  | RDR2-sensitive |
| TCCGATTGAGGTGTTCTTTGTGGC  | 42 | 0   | RDR2-resistant |
| TCCGCAAATGGGCTGACAGGCAA   | 0  | 12  | RDR2-sensitive |
| TCCGCAACGGGAAACTGGACGGTC  | 0  | 13  | RDR2-sensitive |
| TCCGCAACTGTGGGCCGACGGTC   | 0  | 23  | RDR2-sensitive |
| TCCGCAATCTGGGCGCAAGAACGG  | 0  | 14  | RDR2-sensitive |
| TCCGCACCTGTGGGCCGACGGTC   | 0  | 13  | RDR2-sensitive |
| TCCGCAGCTCTGGGCCGACGGTC   | 0  | 27  | RDR2-sensitive |
| TCCGCAGTCTAGAACCGACGGTC   | 0  | 16  | RDR2-sensitive |
| TCCGCATGCAGACTGTGACAGCTT  | 0  | 9   | RDR2-sensitive |
| TCCGCATTTTGCACGGTCTGAGGC  | 0  | 12  | RDR2-sensitive |
| TCCGCCATCTAGCGACGTCTTCGG  | 0  | 11  | RDR2-sensitive |
| TCCGCCCTGCGGTACAGATCGT    | 0  | 9   | RDR2-sensitive |
| TCCGCCCTGTAGATCAACGGCTG   | 2  | 22  | RDR2-sensitive |
| TCCGCCCTGTAGATCAACGGCTT   | 1  | 52  | RDR2-sensitive |
| TCCGCCTGGCTCCCTGGAAACGGC  | 0  | 16  | RDR2-sensitive |
| TCCGCGACACAGGGTCTGACGGTC  | 0  | 9   | RDR2-sensitive |
| TCCGCGACCTGACGACGAAAGCAC  | 0  | 15  | RDR2-sensitive |
| TCCGCGACCTGACGCAGGGGCTAG  | 0  | 10  | RDR2-sensitive |
| TCCGCGACCTGGCGCAGAAGCTGA  | 0  | 18  | RDR2-sensitive |
| TCCGCGACGAATTCGGCAACCATC  | 0  | 12  | RDR2-sensitive |
| TCCGCGACTGAGGAGAAGCGACGG  | 0  | 15  | RDR2-sensitive |
| TCCGCGACTGTAAGCGATGCGCAT  | 0  | 11  | RDR2-sensitive |
| TCCGCGACTGTGGGCCGACGGTC   | 0  | 11  | RDR2-sensitive |
| TCCGCGACTTAGGCACAGAAGCAG  | 1  | 18  | RDR2-sensitive |
| TCCGCGAGGTGGACTGTTTCATGGC | 0  | 9   | RDR2-sensitive |
| TCCGCGATATGGTTGATCGGCGAA  | 16 | 0   | RDR2-resistant |
| TCCGCGATCTAGGGACGGACGGTC  | 1  | 17  | RDR2-sensitive |
| TCCGCGCATGAGAACAGCAGGACA  | 0  | 11  | RDR2-sensitive |
| TCCGCGCATGTGTAGGGACGACGA  | 0  | 23  | RDR2-sensitive |
| TCCGCGCCTAGGGCTTGGACGGTC  | 0  | 12  | RDR2-sensitive |
| TCCGCGCCTGGGGCTTAAACGGTT  | 0  | 10  | RDR2-sensitive |
| TCCGCGCCTGTGGACCGGACGGTC  | 0  | 9   | RDR2-sensitive |
| TCCGCGCCTGTGGGCCAGACGGTC  | 0  | 11  | RDR2-sensitive |
| TCCGCGCGCTGTAGAAGGCACCGT  | 1  | 107 | RDR2-sensitive |
| TCCGCGCTCTGGAAGTACGGTCT   | 0  | 25  | RDR2-sensitive |
| TCCGCGCTCTGGATCGGACGGTCC  | 0  | 10  | RDR2-sensitive |
| TCCGCGCTCTGGGACTGGACGGTC  | 0  | 14  | RDR2-sensitive |
| TCCGCGGAATCCGGCGCTGAAGAT  | 3  | 21  | RDR2-sensitive |
| TCCGCGGACCAAGATAAAGGAGGT  | 0  | 9   | RDR2-sensitive |
| TCCGCGGATCACGCCTATCGTCGT  | 0  | 32  | RDR2-sensitive |
| TCCGCGGCACAGGGTCGGACGGTC  | 0  | 42  | RDR2-sensitive |
| TCCGCGGGATTGTAATGTCAGCAT  | 0  | 9   | RDR2-sensitive |

|                           |    |     |                |
|---------------------------|----|-----|----------------|
| TCCGCGGTCCGGACTGTCCACGGT  | 0  | 15  | RDR2-sensitive |
| TCCGCGGTCTGAGTGCAGGAGCGA  | 0  | 29  | RDR2-sensitive |
| TCCGCGTCTGTGGGCCGGACGGTC  | 1  | 42  | RDR2-sensitive |
| TCCGCGTGCAGGGTCTGGACGGTC  | 0  | 17  | RDR2-sensitive |
| TCCGCGTGTGTGCAGGACGATGGC  | 0  | 13  | RDR2-sensitive |
| TCCGCGTTACGTAGGCAGAGCGT   | 0  | 11  | RDR2-sensitive |
| TCCGCTGACGGACGACACGGCTAG  | 1  | 14  | RDR2-sensitive |
| TCCGCTGCTGTACTGGGTCTTCGG  | 0  | 23  | RDR2-sensitive |
| TCCGGAACCTGAACCAGTGGGTAC  | 0  | 16  | RDR2-sensitive |
| TCCGGAAGAGTAGGTACGCGGCAC  | 0  | 11  | RDR2-sensitive |
| TCCGGAATAGTCGGGAACGGAAAC  | 0  | 14  | RDR2-sensitive |
| TCCGGACAAACGCAGAGAAGGAAC  | 0  | 23  | RDR2-sensitive |
| TCCGGACAAGTAGCGCATTTCGA   | 0  | 11  | RDR2-sensitive |
| TCCGGACAGGAAACTAAGCACGGC  | 0  | 15  | RDR2-sensitive |
| TCCGGACAGTCTGCGCAGAGCCGA  | 0  | 11  | RDR2-sensitive |
| TCCGGACCGAGCCACCAGTGACGC  | 0  | 14  | RDR2-sensitive |
| TCCGGACGCAGCCTGCACGCGCGG  | 0  | 14  | RDR2-sensitive |
| TCCGGACGGCTAAGCCCACACTGG  | 1  | 16  | RDR2-sensitive |
| TCCGGACGGTAAGAAACGGATAA   | 0  | 18  | RDR2-sensitive |
| TCCGGACGGTCCGCGCCTGTGGGC  | 1  | 12  | RDR2-sensitive |
| TCCGGACGGTCTGCAGGAGTAGTC  | 0  | 9   | RDR2-sensitive |
| TCCGGACGGTTTGACTAGGGCTAG  | 0  | 12  | RDR2-sensitive |
| TCCGGACGTACATAGAGAAGGAGC  | 0  | 9   | RDR2-sensitive |
| TCCGGACTAGCCCGATAAACACGG  | 0  | 10  | RDR2-sensitive |
| TCCGGACTCAAGACGGGACGGTCT  | 0  | 9   | RDR2-sensitive |
| TCCGGATATAACTCCCGAGGACGA  | 0  | 30  | RDR2-sensitive |
| TCCGGATCTGATGGGTGCCGCGGC  | 0  | 11  | RDR2-sensitive |
| TCCGGATCTGCTTGAGGGCGTCGC  | 5  | 24  | RDR2-sensitive |
| TCCGGATCTGCTTGAGGGCGTCGT  | 1  | 21  | RDR2-sensitive |
| TCCGGATCTGGATTCTGAAGATGGT | 0  | 10  | RDR2-sensitive |
| TCCGGATGCAGCCTGCACGCGCGA  | 0  | 25  | RDR2-sensitive |
| TCCGGATGTACGCAGCAGGCCTGG  | 0  | 18  | RDR2-sensitive |
| TCCGGATGTTACTCAAGCGTCGAC  | 0  | 17  | RDR2-sensitive |
| TCCGGATTTGAAAATAGGCTGGTG  | 0  | 13  | RDR2-sensitive |
| TCCGGCACGGCCTGTATTCGGCAC  | 0  | 32  | RDR2-sensitive |
| TCCGGCACGGTAGAATAAGCGGGC  | 2  | 145 | RDR2-sensitive |
| TCCGGCAGAAACGAACAAGGCCTT  | 0  | 12  | RDR2-sensitive |
| TCCGGCAGCGGCTCTAGTATCTCC  | 0  | 28  | RDR2-sensitive |
| TCCGGCATGTTTGGGAGTTAGCTC  | 0  | 10  | RDR2-sensitive |
| TCCGGCCCTGAGGACTAGACGGTC  | 0  | 10  | RDR2-sensitive |
| TCCGGCGTACGGCGTCTCCGACAA  | 0  | 25  | RDR2-sensitive |
| TCCGGCTAGTAGGGGTGAAAACGG  | 0  | 45  | RDR2-sensitive |
| TCCGGCTGCGGCTGCGGCTTCTAC  | 0  | 34  | RDR2-sensitive |
| TCCGGGAATGTAGCAGGTAACCGG  | 0  | 12  | RDR2-sensitive |
| TCCGGGACGGATACAGGACGGGAT  | 0  | 38  | RDR2-sensitive |
| TCCGGGAGCCTGGCTGACGCGAGC  | 0  | 22  | RDR2-sensitive |
| TCCGGGCAAGAAACGACGGATCAA  | 0  | 12  | RDR2-sensitive |
| TCCGGGCAGGTAAGAAACGGATAA  | 0  | 9   | RDR2-sensitive |
| TCCGGGCGGAAGACATTGTCAGGT  | 71 | 23  | RDR2-resistant |

|                            |    |    |                |
|----------------------------|----|----|----------------|
| TCCGGGCGGATAAGTGACGGATAC   | 1  | 20 | RDR2-sensitive |
| TCCGGGCTAGCACGATACAGTGGA   | 0  | 9  | RDR2-sensitive |
| TCCGGGCTCTCGGACGGACGGTGT   | 0  | 37 | RDR2-sensitive |
| TCCGGGCTGATTTGGTGACAAGGC   | 0  | 19 | RDR2-sensitive |
| TCCGGGCTGTGAGAGGAGGGGAAA   | 0  | 11 | RDR2-sensitive |
| TCCGGGGCTGAGTTGCAGAGACAG   | 0  | 11 | RDR2-sensitive |
| TCCGGGTCCTGTTTTATAGACGTC   | 13 | 52 | RDR2-sensitive |
| TCCGGGTTCTGTTTTATAGACGTC   | 0  | 10 | RDR2-sensitive |
| TCCGGTGACAACAGTAGTGCGCGT   | 0  | 9  | RDR2-sensitive |
| TCCGGTGACGACAGCATGACACAG   | 0  | 9  | RDR2-sensitive |
| TCCGGTGA CTGTCCGGCCGAACGG  | 2  | 49 | RDR2-sensitive |
| TCCGGTGCGACGTAGAGAAGACGC   | 0  | 15 | RDR2-sensitive |
| TCCGGTTAGGACTGCAGGAGTGGT   | 0  | 10 | RDR2-sensitive |
| TCCGGTTCGACGCAGGGAAGACAT   | 0  | 13 | RDR2-sensitive |
| TCCGGTTCTATGCGGTCTCGGGCC   | 0  | 9  | RDR2-sensitive |
| TCCGTAACACAGGGTTCGGACGGTC  | 0  | 22 | RDR2-sensitive |
| TCCGTAACAGACGACTGGGATCGC   | 0  | 12 | RDR2-sensitive |
| TCCGTACGATGGGACGCATGATTC   | 0  | 9  | RDR2-sensitive |
| TCCGTACGGGCCGACAGCATGGAC   | 0  | 10 | RDR2-sensitive |
| TCCGTCAAGTCGGCAGGTCTTTGG   | 0  | 9  | RDR2-sensitive |
| TCCGTCAAGTAGCTGTAGCCC GGCC | 0  | 17 | RDR2-sensitive |
| TCCGTGAGCTGAGCCGAGTAGAG    | 0  | 13 | RDR2-sensitive |
| TCCGTGTTTTACTGTATCGTGCAA   | 0  | 14 | RDR2-sensitive |
| TCCGTCTTTGTTGCCGGTCGTCGT   | 0  | 13 | RDR2-sensitive |
| TCCGTGACATAGGGTTCGGACGGTC  | 0  | 10 | RDR2-sensitive |
| TCCGTGATCTGGACGCAGGAGCGA   | 0  | 29 | RDR2-sensitive |
| TCCGTGATCTGGTGTAGGGGCTAT   | 0  | 10 | RDR2-sensitive |
| TCCGTGCACGGACTGATCCGGCCT   | 0  | 27 | RDR2-sensitive |
| TCCGTGGAGAACTGAGTGACGCGC   | 0  | 20 | RDR2-sensitive |
| TCCGTGGATTTGGGCCGGACGGTC   | 0  | 9  | RDR2-sensitive |
| TCCGTGGCACAAGGTTCGGACGGTC  | 0  | 13 | RDR2-sensitive |
| TCCGTGGCCTAGAGTTCGGACGATC  | 0  | 10 | RDR2-sensitive |
| TCCGTGGCTCTGGACCGGATGGTT   | 0  | 15 | RDR2-sensitive |
| TCCGTGTCTAGGACTCGGACGGTC   | 0  | 40 | RDR2-sensitive |
| TCCGTGTCTAGGGCTTGGACGGTC   | 0  | 10 | RDR2-sensitive |
| TCCGTGTCTGAACTGATGTACGT    | 0  | 15 | RDR2-sensitive |
| TCCGTGTCTGACGCAGAGGATCAT   | 0  | 76 | RDR2-sensitive |
| TCCGTTGAGCGGACTCGATGGCT    | 0  | 16 | RDR2-sensitive |
| TCCGTTCTGGTAGAATAGCCCGGC   | 0  | 10 | RDR2-sensitive |
| TCCGTTGCATTGGTTCGGGTCGGAT  | 0  | 18 | RDR2-sensitive |
| TCCGTTGTAGTCTAGTTGGTCAGG   | 49 | 2  | RDR2-resistant |
| TCCGTTTACTGTAGTGCACGGCCT   | 0  | 28 | RDR2-sensitive |
| TCCGTTTACTGTAGTGGAGGCTAA   | 0  | 12 | RDR2-sensitive |
| TCCGTTTACTGTAGTGGAGGGCAG   | 0  | 10 | RDR2-sensitive |
| TCCTAACACGGCTGGTAACCACC    | 0  | 9  | RDR2-sensitive |
| TCCTAACATCGCACCGGACGGTCC   | 0  | 10 | RDR2-sensitive |
| TCCTAACCATGCCTGGCGGGTCGG   | 0  | 9  | RDR2-sensitive |
| TCCTACACCTAGGTCGTGGACTGT   | 0  | 12 | RDR2-sensitive |
| TCCTACGTCGTGAAGATCGGGCAT   | 4  | 84 | RDR2-sensitive |

|                           |     |     |                |
|---------------------------|-----|-----|----------------|
| TCCTACTATCGCTGCGACTCGGCC  | 1   | 12  | RDR2-sensitive |
| TCCTACTGGGCTGATTTGGTGGAC  | 0   | 9   | RDR2-sensitive |
| TCCTAGAACTGTCTGTATAGAGGC  | 0   | 9   | RDR2-sensitive |
| TCCTAGAATCAGGGATGGAACGGC  | 1   | 14  | RDR2-sensitive |
| TCCTAGAATCGGGGATGGAACGGC  | 0   | 9   | RDR2-sensitive |
| TCCTAGACTGTAGATGGCGAGCAA  | 0   | 9   | RDR2-sensitive |
| TCCTAGACTGTCTCGGCAACACAG  | 0   | 10  | RDR2-sensitive |
| TCCTAGCACTGGCGGAACTGAGAA  | 0   | 9   | RDR2-sensitive |
| TCCTAGGCTCCTAGCAGTCGGCGT  | 0   | 10  | RDR2-sensitive |
| TCCTAGGGTCGTCTTGGGATCGGC  | 1   | 19  | RDR2-sensitive |
| TCCTAGGGTGTGCCTTGGCGTCGG  | 0   | 20  | RDR2-sensitive |
| TCCTAGGGTGTGTCTTGGCGTCGG  | 1   | 12  | RDR2-sensitive |
| TCCTAGGTGTTGCCTAGGGTCGGC  | 0   | 9   | RDR2-sensitive |
| TCCTAGTCGGTGTAGACGTGCGGT  | 0   | 44  | RDR2-sensitive |
| TCCTATATCGCATGGATTGGATGG  | 0   | 11  | RDR2-sensitive |
| TCCTATTAGTTGTCGTTTAGGACA  | 0   | 11  | RDR2-sensitive |
| TCCTCAGACTGTCAGCAATGGCAT  | 0   | 37  | RDR2-sensitive |
| TCCTCATCCATCGGGTTTCGGCGT  | 0   | 9   | RDR2-sensitive |
| TCCTCATCTTAGGATTTAGGGCGG  | 0   | 15  | RDR2-sensitive |
| TCCTCATGCTGAGTTGGACACCGT  | 0   | 11  | RDR2-sensitive |
| TCCTCCAACGCGGTTCGTGACGGC  | 0   | 13  | RDR2-sensitive |
| TCCTCCCGTCAGCAGTAGAGACGC  | 0   | 26  | RDR2-sensitive |
| TCCTCCCGTCAGCAGTAGAGGCGC  | 11  | 102 | RDR2-sensitive |
| TCCTCCCGTCAGCAGTAGAGGCGT  | 1   | 13  | RDR2-sensitive |
| TCCTCGACTGTTTCTCCGTTACC   | 21  | 2   | RDR2-resistant |
| TCCTCGAGCGGCTCTGTTAGGCAT  | 0   | 16  | RDR2-sensitive |
| TCCTCGATCCGGAGTAGTGGCGGC  | 0   | 28  | RDR2-sensitive |
| TCCTCGGATGAGGAGGACTCGGAC  | 20  | 0   | RDR2-resistant |
| TCCTCGGCCTGGCAGGAGCAGGTT  | 0   | 9   | RDR2-sensitive |
| TCCTCGGTCATGAATCCTTGCAGA  | 23  | 0   | RDR2-resistant |
| TCCTCGTCCACCGTGATCGTC     | 18  | 0   | RDR2-resistant |
| TCCTCTATCGTTCGGTAGGCTGGC  | 0   | 12  | RDR2-sensitive |
| TCCTCTGAATTTGTAGAGCAGGTT  | 18  | 0   | RDR2-resistant |
| TCCTCTGACGTGGGGGGTGGGCAC  | 0   | 10  | RDR2-sensitive |
| TCCTCTGGTCAGGACTGCGGACGG  | 0   | 11  | RDR2-sensitive |
| TCCTCTGTGGTTATATGTGGCAGC  | 29  | 1   | RDR2-resistant |
| TCCTGACGAAGCAAGGGCTGTGAC  | 0   | 15  | RDR2-sensitive |
| TCCTGACGACTGTACAGATTGCGT  | 0   | 11  | RDR2-sensitive |
| TCCTGACGCGTAGGTTCCGGCCTGG | 0   | 43  | RDR2-sensitive |
| TCCTGAGATCGCCGAGATGAGCAT  | 0   | 9   | RDR2-sensitive |
| TCCTGAGATGGCTGAGATCGACGA  | 0   | 11  | RDR2-sensitive |
| TCCTGAGCGCGCTGTCGGGCGGCC  | 0   | 18  | RDR2-sensitive |
| TCCTGATAAGGCTCATGATGTGTT  | 376 | 0   | RDR2-resistant |
| TCCTGATCATCGTACATCTTCGGC  | 51  | 16  | RDR2-resistant |
| TCCTGATCCTCGTGAGGAGCTGAT  | 0   | 9   | RDR2-sensitive |
| TCCTGATCTCGACAGCCTGGCGGT  | 0   | 22  | RDR2-sensitive |
| TCCTGATCTCGGCAGCCTGGCGGT  | 0   | 31  | RDR2-sensitive |
| TCCTGATGATGGTAGAGAATTGTT  | 18  | 0   | RDR2-resistant |
| TCCTGCACCAGGTCGCGGACCGTC  | 0   | 10  | RDR2-sensitive |

|                           |    |    |                |
|---------------------------|----|----|----------------|
| TCCTGCACGTCCGGATACAGGCAT  | 0  | 9  | RDR2-sensitive |
| TCCTGCCTGACGTCCGGACGGTCC  | 0  | 9  | RDR2-sensitive |
| TCCTGCGATACGGTCGGTCGGCGT  | 4  | 43 | RDR2-sensitive |
| TCCTGCGATACGGTCGGTCGTCGT  | 0  | 9  | RDR2-sensitive |
| TCCTGCGATACGGTCGGTTGGCGA  | 0  | 15 | RDR2-sensitive |
| TCCTGCGATACGGTCGGTTGGCGT  | 5  | 63 | RDR2-sensitive |
| TCCTGCGATATGGTCGGTTGGCGT  | 0  | 9  | RDR2-sensitive |
| TCCTGCGATTTGGTCGGTCGGCGC  | 1  | 26 | RDR2-sensitive |
| TCCTGCGATTTGGTCGGTCGGTGC  | 2  | 29 | RDR2-sensitive |
| TCCTGCGCGTCCGGATACAGGCAT  | 0  | 11 | RDR2-sensitive |
| TCCTGCTAGCTGAACGAGGATGAG  | 0  | 9  | RDR2-sensitive |
| TCCTGCTCGGATAGTCGGATTCCT  | 0  | 9  | RDR2-sensitive |
| TCCTGCTGTAGGAAACCGCGTGCC  | 21 | 0  | RDR2-resistant |
| TCCTGGACACCAGGATGACGAGGA  | 23 | 2  | RDR2-resistant |
| TCCTGGACCTGTAGAATACCGGAT  | 0  | 12 | RDR2-sensitive |
| TCCTGGACCGGTAGGTTTCGGCCTG | 0  | 11 | RDR2-sensitive |
| TCCTGGACTTTGCCGAGTGCCGGA  | 0  | 17 | RDR2-sensitive |
| TCCTGGATGAGACGTGACAGACAA  | 3  | 24 | RDR2-sensitive |
| TCCTGGCAGAACCGTGACCCATAT  | 0  | 22 | RDR2-sensitive |
| TCCTGGCTCTAGAGATGCGACCAA  | 0  | 30 | RDR2-sensitive |
| TCCTGGGACCTCCGAAGCTGCCGG  | 0  | 13 | RDR2-sensitive |
| TCCTGGGACCTTCGAAGCTGCCGG  | 1  | 13 | RDR2-sensitive |
| TCCTGGGCTGCAACTAGGCGTGTT  | 1  | 21 | RDR2-sensitive |
| TCCTGGGCTGGCATCTCGACGGGA  | 0  | 14 | RDR2-sensitive |
| TCCTGGTTAACAAGATTCTCAGAC  | 15 | 0  | RDR2-resistant |
| TCCTGTAATAGAGCGACGTTCAAC  | 30 | 2  | RDR2-resistant |
| TCCTGTACAAGATGAGCTCGGCC   | 0  | 10 | RDR2-sensitive |
| TCCTGTAGATCTGTTGGCACCGGC  | 1  | 12 | RDR2-sensitive |
| TCCTGTAGCCACTAAAGCCGACCG  | 0  | 21 | RDR2-sensitive |
| TCCTGTAGCGAGCCGAGCCGAGCC  | 0  | 10 | RDR2-sensitive |
| TCCTGTAGCGGGACGGACACGCAT  | 0  | 10 | RDR2-sensitive |
| TCCTGTAGTGACTAACAGTGAGGC  | 44 | 10 | RDR2-resistant |
| TCCTGTAGTGTTGGCACGGCTTGT  | 0  | 11 | RDR2-sensitive |
| TCCTGTCAGCAGTAGAGGCGCAAG  | 0  | 12 | RDR2-sensitive |
| TCCTGTCTCGTTCGAATACGTCGT  | 0  | 18 | RDR2-sensitive |
| TCCTGTCGACAAGTCGGACGGTTT  | 0  | 28 | RDR2-sensitive |
| TCCTGTCTGACGGCCGGACGGTCC  | 0  | 10 | RDR2-sensitive |
| TCCTGTGATACGGTCGGTTGGCGT  | 1  | 12 | RDR2-sensitive |
| TCCTGTTTGACTGCGGCGTGTGGA  | 0  | 9  | RDR2-sensitive |
| TCCTTAACACAAGACGCTGGGCAC  | 1  | 16 | RDR2-sensitive |
| TCCTTAAGATGGCAGTGTAGGCGT  | 0  | 13 | RDR2-sensitive |
| TCCTTACGCCGGCTGTAGGGGCAC  | 0  | 11 | RDR2-sensitive |
| TCCTTAGATTGAAGGCTCGGTCGT  | 0  | 10 | RDR2-sensitive |
| TCCTTAGTGGGCTGGGCTGGGCTA  | 0  | 13 | RDR2-sensitive |
| TCCTTATTTGTGAGATCGAGGACA  | 24 | 2  | RDR2-resistant |
| TCCTTCGCGGGATTGCAGAAGCGG  | 0  | 16 | RDR2-sensitive |
| TCCTTCGGTCGTAGCGCGAGATGG  | 1  | 16 | RDR2-sensitive |
| TCCTTCGGTTCGGTTAGTTCGGTT  | 17 | 98 | RDR2-sensitive |
| TCCTTCGTGGGATTGCAGAAGCGG  | 0  | 10 | RDR2-sensitive |

|                           |     |    |                |
|---------------------------|-----|----|----------------|
| TCCTTGACTACGACGAACACGGA   | 0   | 16 | RDR2-sensitive |
| TCCTTGACTACGGCGAACACGGA   | 0   | 46 | RDR2-sensitive |
| TCCTTGCTAGTAGGAGTCGTGGT   | 57  | 1  | RDR2-resistant |
| TCCTTGGTACAGAACTCCGGCCT   | 0   | 10 | RDR2-sensitive |
| TCCTTGGTAGAAGTGTGGAATGAT  | 77  | 6  | RDR2-resistant |
| TCCTTGTTGGACGGAGAAAGGAGG  | 0   | 11 | RDR2-sensitive |
| TCCTTGTTGGACGGAGAGAGGAGA  | 0   | 11 | RDR2-sensitive |
| TCCTTGTTGGACGGATAAAGGAGC  | 0   | 23 | RDR2-sensitive |
| TCCTTGTTGGACGGCGTAGAGAAC  | 1   | 25 | RDR2-sensitive |
| TCCTTGTTGGAGGTATACAAGAGC  | 0   | 14 | RDR2-sensitive |
| TCCTTTACACAGTAGGATTGTCGG  | 0   | 18 | RDR2-sensitive |
| TCCTTTACCAAGTTGCTCGGACA   | 23  | 3  | RDR2-resistant |
| TCCTTTGCAGACGACTTAAAACGC  | 15  | 0  | RDR2-resistant |
| TCCTTTGGAGGAGTTAGAGCCGGA  | 0   | 11 | RDR2-sensitive |
| TCCTTTTTTGCATCGCGAGACACA  | 0   | 9  | RDR2-sensitive |
| TCCTTTTTTGGTGGTCTGCTTGG   | 15  | 0  | RDR2-resistant |
| TCGAAAAGCGGCTCGGCTCGGCT   | 0   | 14 | RDR2-sensitive |
| TCGAAAACCTGACTCGACTCGGCT  | 43  | 0  | RDR2-resistant |
| TCGAAACACTAGGGACCTCGGCGC  | 0   | 10 | RDR2-sensitive |
| TCGAACACAAGTGTCTAGGCTAC   | 14  | 0  | RDR2-resistant |
| TCGAACATAGAGCTAAGACACTGT  | 0   | 10 | RDR2-sensitive |
| TCGAACCCAGGACCTGAGGAGTGC  | 3   | 25 | RDR2-sensitive |
| TCGAACCGGCTCGACGCTCAGAAT  | 1   | 17 | RDR2-sensitive |
| TCGAACCGTAGACCGTCCGGCCTC  | 0   | 15 | RDR2-sensitive |
| TCGAACGAGTCGTACTGCCATCAT  | 0   | 11 | RDR2-sensitive |
| TCGAACGGCAAGGGCTCCGGAGGC  | 0   | 9  | RDR2-sensitive |
| TCGAACGGCAAGGGCTCCGGAGGC  | 0   | 16 | RDR2-sensitive |
| TCGAAC TAGCGTTAGGACATTCTA | 70  | 10 | RDR2-resistant |
| TCGAAC TCGAGTAGGGGAAGGCGC | 0   | 11 | RDR2-sensitive |
| TCGAAC TCTATTGGACATGGCAAG | 21  | 2  | RDR2-resistant |
| TCGAAGACGAACGTAGAAGCGCAG  | 0   | 11 | RDR2-sensitive |
| TCGAAGCAGCGGAGCCGATGACGT  | 0   | 11 | RDR2-sensitive |
| TCGAATAAACTGACTGGCTGATGG  | 24  | 1  | RDR2-resistant |
| TCGAATTCTTGAGAAATTGGGGTG  | 18  | 0  | RDR2-resistant |
| TCGACACAGGACCACACTCGGCAA  | 1   | 16 | RDR2-sensitive |
| TCGACACAGGACGGCACTCGGCAA  | 0   | 9  | RDR2-sensitive |
| TCGACACATCTGATCGGATATTAT  | 0   | 11 | RDR2-sensitive |
| TCGACACGACTAGCAGGCTGACGT  | 0   | 31 | RDR2-sensitive |
| TCGACACGACTCTCGGCAACGGAT  | 126 | 30 | RDR2-resistant |
| TCGACAGAGTGAGGCTGACAGCAG  | 3   | 45 | RDR2-sensitive |
| TCGACATAAAACGGCTCTCGGCAA  | 0   | 9  | RDR2-sensitive |
| TCGACATCAGAGCCCAATGACGAC  | 0   | 10 | RDR2-sensitive |
| TCGACATCGACAGACACTCGGCAA  | 0   | 16 | RDR2-sensitive |
| TCGACCACGTTCCGGCTCGTCTGGC | 0   | 51 | RDR2-sensitive |
| TCGACCCGATGAGGATCGTCCGGC  | 20  | 0  | RDR2-resistant |
| TCGACCCGCGGACGGTAAAACACGG | 0   | 16 | RDR2-sensitive |
| TCGACGAAATAGAGGCTCAGGCGA  | 1   | 25 | RDR2-sensitive |
| TCGACGAAATAGAGGCTCAGGCGG  | 0   | 11 | RDR2-sensitive |
| TCGACGAAATGGAGGCGATGACGT  | 0   | 24 | RDR2-sensitive |

|                           |     |    |                |
|---------------------------|-----|----|----------------|
| TCGACGAACTAAGACTTTTCGGCAT | 0   | 26 | RDR2-sensitive |
| TCGACGACTGGCAGAAGGACCGTC  | 0   | 12 | RDR2-sensitive |
| TCGACGACTGTACAGATTGCGCCA  | 1   | 13 | RDR2-sensitive |
| TCGACGACTGTAGCAAATGGTTC   | 0   | 23 | RDR2-sensitive |
| TCGACGAGCAGACTGGGCGAGCAC  | 0   | 9  | RDR2-sensitive |
| TCGACGAGGAGCCAACGAAGGATC  | 27  | 0  | RDR2-resistant |
| TCGACGATTTAAAGGCGTAGACGA  | 0   | 9  | RDR2-sensitive |
| TCGACGCTCTGGGTGGCCGGTATG  | 0   | 14 | RDR2-sensitive |
| TCGACGGGACTTATTTTCGATGGC  | 0   | 9  | RDR2-sensitive |
| TCGACGGGCTCTGCATGGGGGTGT  | 0   | 10 | RDR2-sensitive |
| TCGACGGGGCTCGGGGGAGGATGC  | 87  | 2  | RDR2-resistant |
| TCGACGGTTTTATCACGGGCCAC   | 0   | 10 | RDR2-sensitive |
| TCGACGTACAGAGACTCGGCAT    | 0   | 20 | RDR2-sensitive |
| TCGACGTACTGTGACGGTGGGGAT  | 0   | 15 | RDR2-sensitive |
| TCGACGTAGAGCCGAAGAGAGGTG  | 0   | 19 | RDR2-sensitive |
| TCGACGTGGAACCGAGCTCGGCGC  | 10  | 94 | RDR2-sensitive |
| TCGACGTGGAAGACTCGGTGGCAA  | 0   | 10 | RDR2-sensitive |
| TCGACGTTTTGTAGGCGTAGGCCA  | 0   | 18 | RDR2-sensitive |
| TCGACTCAGACGGAGACACTACAC  | 8   | 29 | RDR2-sensitive |
| TCGACTCGGTTTAGAACGGCTCGC  | 0   | 10 | RDR2-sensitive |
| TCGACTCGTGGAAACCGGCCGGTT  | 0   | 14 | RDR2-sensitive |
| TCGACTCGTGGATCCGATCGGCAA  | 0   | 39 | RDR2-sensitive |
| TCGACTCGTGGATCCGATCGGCAT  | 0   | 17 | RDR2-sensitive |
| TCGACTCGTGGATCTGATTGGCAA  | 0   | 10 | RDR2-sensitive |
| TCGACTCTCCCAAGGACGTTTCAT  | 22  | 2  | RDR2-resistant |
| TCGACTGCTGTGGACAGAAGCTGG  | 0   | 9  | RDR2-sensitive |
| TCGACTGTCCGGAATACCGTAGAT  | 2   | 22 | RDR2-sensitive |
| TCGACTTGATGTGCTTCGTTTGGT  | 132 | 1  | RDR2-resistant |
| TCGAGAAACGGTATCTGTTTACAC  | 18  | 0  | RDR2-resistant |
| TCGAGACAAGGACGAGGATGACAA  | 0   | 11 | RDR2-sensitive |
| TCGAGACGTGAGACGGTATGGGC   | 0   | 20 | RDR2-sensitive |
| TCGAGACGTGCATCACATGAGCAG  | 0   | 36 | RDR2-sensitive |
| TCGAGACTTCGGATGGCCGCTAGG  | 30  | 1  | RDR2-resistant |
| TCGAGAGACCTGACTGACGAGCGA  | 0   | 9  | RDR2-sensitive |
| TCGAGAGCCAGGCTGTGCGCGTGC  | 0   | 10 | RDR2-sensitive |
| TCGAGATCTACGGGCCCGAGGCAC  | 0   | 44 | RDR2-sensitive |
| TCGAGATCTACGGGCCCGAGGCAT  | 0   | 28 | RDR2-sensitive |
| TCGAGATGTGCGACGAGCTGGGGC  | 16  | 0  | RDR2-resistant |
| TCGAGCAACGGGCAACGGATGAGG  | 47  | 1  | RDR2-resistant |
| TCGAGCAGACTGTGTTGCCGGTAT  | 0   | 10 | RDR2-sensitive |
| TCGAGCCCGGCACGGTATGAACAA  | 0   | 17 | RDR2-sensitive |
| TCGAGCCGAGCCAAGTAGAGCCGA  | 0   | 66 | RDR2-sensitive |
| TCGAGCCGGACCAGGTCCAGACGT  | 1   | 33 | RDR2-sensitive |
| TCGAGCGACTAAGGTTAGGCAGAT  | 0   | 9  | RDR2-sensitive |
| TCGAGCGGACGGTGTGCCAATGT   | 0   | 9  | RDR2-sensitive |
| TCGAGCGGGCGGCTGCACATGCAT  | 0   | 10 | RDR2-sensitive |
| TCGAGCTACAGTCGGTAACACCAT  | 0   | 9  | RDR2-sensitive |
| TCGAGCTGAGCCGAGTAGAGCCGA  | 0   | 14 | RDR2-sensitive |
| TCGAGCTTCTTCTCACCGTCGTC   | 29  | 0  | RDR2-resistant |

|                           |     |    |                |
|---------------------------|-----|----|----------------|
| TCGAGGAACGGAACACGGGCGCGC  | 0   | 11 | RDR2-sensitive |
| TCGAGGAAGACGTGATGATGACCT  | 14  | 0  | RDR2-resistant |
| TCGAGGAATTCAGGCATTTAATC   | 15  | 0  | RDR2-resistant |
| TCGAGGACTCGCAGGCACAATAA   | 0   | 10 | RDR2-sensitive |
| TCGAGGACTGTGGCGTCATCTTGG  | 0   | 9  | RDR2-sensitive |
| TCGAGGACTTCAGCTGAAGGCTGT  | 0   | 27 | RDR2-sensitive |
| TCGAGGACTTCAGCTGAAGGTCGT  | 0   | 24 | RDR2-sensitive |
| TCGAGGCGGATTAAGGCATCCTGG  | 21  | 2  | RDR2-resistant |
| TCGAGGGACCTGACTGACGAGCGG  | 0   | 17 | RDR2-sensitive |
| TCGAGTAGGGCCGGCTGACTCCGT  | 0   | 11 | RDR2-sensitive |
| TCGAGTAGTGCTCAGGGTCGTCGA  | 0   | 32 | RDR2-sensitive |
| TCGAGTCAGCTGCTGAAACGGTAA  | 0   | 43 | RDR2-sensitive |
| TCGAGTCAGCTGTTGAAACGGTAA  | 2   | 20 | RDR2-sensitive |
| TCGAGTCAGCTGTTGAAACGGTAA  | 0   | 17 | RDR2-sensitive |
| TCGAGTGTAGCCGAAGCTGTGCGC  | 0   | 13 | RDR2-sensitive |
| TCGATAACGTTAGGCACTCGGCAA  | 0   | 17 | RDR2-sensitive |
| TCGATAACTCGCTCGACTCGGCTA  | 0   | 10 | RDR2-sensitive |
| TCGATAACTCGCTCGACTCGGCTC  | 4   | 56 | RDR2-sensitive |
| TCGATAACTCGCTCGACTCGGCTT  | 1   | 26 | RDR2-sensitive |
| TCGATAGACTGAGGAGAGGAGGAT  | 0   | 11 | RDR2-sensitive |
| TCGATCACTTAGCGAGCTCGGTAA  | 0   | 46 | RDR2-sensitive |
| TCGATCCACGTGGAACATCCCGGT  | 0   | 12 | RDR2-sensitive |
| TCGATCCTTTAGACCTTCGGAGTT  | 21  | 1  | RDR2-resistant |
| TCGATCGAATAGGACGACGAGCAT  | 0   | 11 | RDR2-sensitive |
| TCGATCTACTTTACAACCGGCATA  | 36  | 1  | RDR2-resistant |
| TCGATCTCAGATTCGTCGGTCGCA  | 26  | 3  | RDR2-resistant |
| TCGATCTCTGAGTAGCTACGGTTT  | 0   | 12 | RDR2-sensitive |
| TCGATCTGTCATCGGACGACGCAC  | 0   | 20 | RDR2-sensitive |
| TCGATGACTCGCCAGAACGACGCG  | 0   | 9  | RDR2-sensitive |
| TCGATGATGAGGCTCGGCTCGGCT  | 0   | 9  | RDR2-sensitive |
| TCGATGCAACTTGACGGATTCGAT  | 0   | 9  | RDR2-sensitive |
| TCGATGCGATTGTGGAGACCGTGC  | 0   | 10 | RDR2-sensitive |
| TCGATGGACGGCAGAACGGCAGAA  | 0   | 17 | RDR2-sensitive |
| TCGATGGCATACTGGTGAAGCTCA  | 0   | 11 | RDR2-sensitive |
| TCGATGTCCGGTCCCTACGTGATGC | 0   | 18 | RDR2-sensitive |
| TCGATGTGACGTAGATGTTGTGGC  | 0   | 20 | RDR2-sensitive |
| TCGATGTGGAGGGCGCTGCGCAGA  | 15  | 0  | RDR2-resistant |
| TCGATGTGTAGTGTGATGGTCTGG  | 27  | 2  | RDR2-resistant |
| TCGATTACATGGCTGAGCGTTGGT  | 21  | 0  | RDR2-resistant |
| TCGATTGGTTGTCTACTTGGTGTA  | 116 | 4  | RDR2-resistant |
| TCGATTGTTAGCAGTATGTTGATT  | 15  | 0  | RDR2-resistant |
| TCGATTTGGCCGTGTAGTGGGCT   | 1   | 14 | RDR2-sensitive |
| TCGCAAACCTGGGCGACGTGCGA   | 0   | 9  | RDR2-sensitive |
| TCGCAACCTAGGACTCAGCACGGT  | 0   | 10 | RDR2-sensitive |
| TCGCAAACCTGGATCGGACGGTCC  | 0   | 15 | RDR2-sensitive |
| TCGCAAGAACTGCGAAGTCGGCGA  | 0   | 18 | RDR2-sensitive |
| TCGCAATACGGTAGGGCATCAGAC  | 0   | 12 | RDR2-sensitive |
| TCGCAGAAAGTGGGACGGTGATGT  | 0   | 13 | RDR2-sensitive |
| TCGCAGAAGATGGGACGGGAATGT  | 1   | 16 | RDR2-sensitive |



|                            |    |     |                |
|----------------------------|----|-----|----------------|
| TCGCAGAAGGCCAGGTAGAGCGGT   | 0  | 21  | RDR2-sensitive |
| TCGCAGACGCATGGAACAGGCACC   | 0  | 9   | RDR2-sensitive |
| TCGCAGATGCACCTCTGCGGTCCG   | 0  | 77  | RDR2-sensitive |
| TCGCAGCAACTCGGCTCGGAGCAA   | 0  | 11  | RDR2-sensitive |
| TCGCAGCAGCTCGGCTCGGCTCGA   | 0  | 11  | RDR2-sensitive |
| TCGCAGCAGCTCGGCTCGGCTCGG   | 0  | 47  | RDR2-sensitive |
| TCGCAGCCTGCAGCAACGGACGGT   | 0  | 19  | RDR2-sensitive |
| TCGCAGGACTGACCGGCTGCATGA   | 59 | 1   | RDR2-resistant |
| TCGCAGGGACTGCTGGTACCGCGC   | 0  | 12  | RDR2-sensitive |
| TCGCAGTAGCTCGGCTCGGCTCGG   | 0  | 14  | RDR2-sensitive |
| TCGCATGGACCAAGCTAAGCTCAT   | 0  | 17  | RDR2-sensitive |
| TCGCATTTCGTACGCGTGTCCGGTAC | 1  | 14  | RDR2-sensitive |
| TCGCCAAACAGCTCTCGGACGCGC   | 0  | 11  | RDR2-sensitive |
| TCGCCAACGTCAGCGACTCTCGGA   | 0  | 11  | RDR2-sensitive |
| TCGCCAATATGTCATCGGACCCAC   | 0  | 45  | RDR2-sensitive |
| TCGCCAGAAGCTCCAGGACGCCAT   | 0  | 17  | RDR2-sensitive |
| TCGCCAGGTCGCGGACCGTCCGGC   | 1  | 20  | RDR2-sensitive |
| TCGCCAGTATGACATCGGACCCAC   | 1  | 44  | RDR2-sensitive |
| TCGCCAGTATGCCATCGGACCCAC   | 3  | 127 | RDR2-sensitive |
| TCGCCAGTATGCCATCGGACCCAT   | 0  | 17  | RDR2-sensitive |
| TCGCCAGTATGCCATCGGACTCAT   | 0  | 31  | RDR2-sensitive |
| TCGCCAGTATGCTATCGGACTCAC   | 0  | 29  | RDR2-sensitive |
| TCGCCAGTATGGCATCGGACCCAC   | 0  | 51  | RDR2-sensitive |
| TCGCCAGTATGTCATCGGACCCAC   | 0  | 17  | RDR2-sensitive |
| TCGCCAGTGACGGGACAACAGCGC   | 0  | 12  | RDR2-sensitive |
| TCGCCCATCTGACGAGCTCGGGAA   | 0  | 22  | RDR2-sensitive |
| TCGCCCTGTTTCGGCTGTCCGGCGC  | 0  | 9   | RDR2-sensitive |
| TCGCCGACTGTAGCTAAATGGTTC   | 0  | 9   | RDR2-sensitive |
| TCGCCGATTGTCGTCGTTTCGTCGT  | 0  | 9   | RDR2-sensitive |
| TCGCCGGCTTTGAGTAGAGAGGAA   | 0  | 17  | RDR2-sensitive |
| TCGCCGGGCAGTCGGAAGAGACGT   | 0  | 9   | RDR2-sensitive |
| TCGCCGTTGCGACTAGGAAGATGC   | 0  | 13  | RDR2-sensitive |
| TCGCCTACGCCTCCAAATCGTCGA   | 1  | 33  | RDR2-sensitive |
| TCGCCTATCTAGCGAACTCGGAAA   | 0  | 39  | RDR2-sensitive |
| TCGCCTGTCCGGCCTCTGACACGGC  | 0  | 12  | RDR2-sensitive |
| TCGCCTTTCGCTGCAGTCGCTGGT   | 0  | 11  | RDR2-sensitive |
| TCGCGACAGACGGAACAGATGCGA   | 0  | 9   | RDR2-sensitive |
| TCGCGACAGGAAGCGATGACGACG   | 1  | 14  | RDR2-sensitive |
| TCGCGACCCACAAACAAGGACCGG   | 0  | 12  | RDR2-sensitive |
| TCGCGACCCACAAACAGGACTGGC   | 1  | 14  | RDR2-sensitive |
| TCGCGACCTACGGCAGGAGCTGAG   | 0  | 12  | RDR2-sensitive |
| TCGCGAGCCTGGAACGAGCCGAGC   | 0  | 14  | RDR2-sensitive |
| TCGCGAGTCTTGTCCGATCGGATA   | 0  | 10  | RDR2-sensitive |
| TCGCGATCCGCGACGAATTCGGCA   | 0  | 23  | RDR2-sensitive |
| TCGCGCAGATTCTGGAACGTGCAG   | 0  | 28  | RDR2-sensitive |
| TCGCGCATGTAGACGAGCGAGCTA   | 0  | 9   | RDR2-sensitive |
| TCGCGCGATGGCAGAACAGGGCGT   | 0  | 55  | RDR2-sensitive |
| TCGCGCGGAGACGCTAGACGACAC   | 0  | 9   | RDR2-sensitive |
| TCGCGCGGCGTTGATGGGGGCATG   | 19 | 0   | RDR2-resistant |

|                           |    |     |                |
|---------------------------|----|-----|----------------|
| TCGCGCGGGCGTAGCCGGTTAGAG  | 0  | 9   | RDR2-sensitive |
| TCGCGCGGGCGTTCCGGTAGAGCGG | 0  | 28  | RDR2-sensitive |
| TCGCGCTCGAAGTCGGAAGATCAG  | 0  | 10  | RDR2-sensitive |
| TCGCGCTCTGGACCGGACGGTCAA  | 0  | 17  | RDR2-sensitive |
| TCGCGCTTCGGTGCCGGACGGTAC  | 2  | 39  | RDR2-sensitive |
| TCGCGGAAACCCAGGTAGAGCGGT  | 0  | 22  | RDR2-sensitive |
| TCGCGGCTAAGGGTCGGACGGTCC  | 0  | 11  | RDR2-sensitive |
| TCGCGGGATTGCAGAAGCGGCGGC  | 0  | 24  | RDR2-sensitive |
| TCGCGGGCTGGGACAAGGCATGAC  | 0  | 24  | RDR2-sensitive |
| TCGCGGTGCTTTTGGGTAGGACGG  | 0  | 21  | RDR2-sensitive |
| TCGCGGTGTGTGTGGAACGGCGGC  | 0  | 25  | RDR2-sensitive |
| TCGCGTAGGACAGTTCGGCAAGGC  | 1  | 62  | RDR2-sensitive |
| TCGCGTAGGACAGTTCGGCTAGAC  | 0  | 24  | RDR2-sensitive |
| TCGCGTAGGACAGTTCGGCTAGGC  | 2  | 243 | RDR2-sensitive |
| TCGCGTCCAGAAGAGTACTCACAT  | 0  | 10  | RDR2-sensitive |
| TCGCGTCCGCCGCCAAATCGTCAG  | 0  | 11  | RDR2-sensitive |
| TCGCGTCCGCCGCTAAATCGTCAG  | 0  | 16  | RDR2-sensitive |
| TCGCGTCGCGTGGAAGGCAGAAC   | 0  | 23  | RDR2-sensitive |
| TCGCGTGAGACTGAATGTACGGGC  | 0  | 9   | RDR2-sensitive |
| TCGCGTGGGACTGAATGTACGGAC  | 0  | 20  | RDR2-sensitive |
| TCGCGTGGTATAGCTGGGACGGAT  | 0  | 10  | RDR2-sensitive |
| TCGCGTTTACCGTCAAGTCGTCGA  | 1  | 56  | RDR2-sensitive |
| TCGCGTTTACCGTCGAGTCGTCGA  | 3  | 36  | RDR2-sensitive |
| TCGCGTTTGCCGTCGAGTCGTCGA  | 0  | 9   | RDR2-sensitive |
| TCGCTAGTATGCCATCGGACCCAC  | 0  | 14  | RDR2-sensitive |
| TCGCTATCTGGCTGAGTCGTCGAG  | 0  | 31  | RDR2-sensitive |
| TCGCTCCAGACACAATCTCGTCGT  | 0  | 10  | RDR2-sensitive |
| TCGCTCCAGACTCGATCTCGTCGT  | 0  | 37  | RDR2-sensitive |
| TCGCTCGACTCGGCTCGTTAGTAG  | 0  | 11  | RDR2-sensitive |
| TCGCTCGGCTGAGATGGCGGCTTT  | 21 | 1   | RDR2-resistant |
| TCGCTCGTTTCGTGGTCAGCTCGG  | 1  | 15  | RDR2-sensitive |
| TCGCTGAAGGTCTGGTAGGAAGAA  | 0  | 18  | RDR2-sensitive |
| TCGCTGCTAAACTCAATCACGGAA  | 33 | 3   | RDR2-resistant |
| TCGCTGGATTGTGCAGGACGACGT  | 0  | 24  | RDR2-sensitive |
| TCGCTGGCAATGGCAGGCTGACGT  | 0  | 14  | RDR2-sensitive |
| TCGCTGGCCAGTGAGATCTGACGT  | 0  | 22  | RDR2-sensitive |
| TCGCTGGCGCTTTTGGTCTCGGAT  | 35 | 6   | RDR2-resistant |
| TCGCTGGCGTGTATAGGACGGTCT  | 0  | 14  | RDR2-sensitive |
| TCGCTGGCTCGCTCGGATCATGGT  | 0  | 13  | RDR2-sensitive |
| TCGCTGTACCATCGAGCCGAGCAG  | 0  | 37  | RDR2-sensitive |
| TCGCTGTAGCCAGGAAGTTGAGCG  | 0  | 9   | RDR2-sensitive |
| TCGCTGTAGTCGCCGGTCCGACGG  | 1  | 15  | RDR2-sensitive |
| TCGCTTAGACTGTCTTCAACGCAT  | 0  | 10  | RDR2-sensitive |
| TCGCTTCAAACACGATCTCGTCGT  | 0  | 9   | RDR2-sensitive |
| TCGCTTGGACGGACGCCTAGACGG  | 0  | 10  | RDR2-sensitive |
| TCGGAAAAGAGGCTCGGCTCGGCT  | 0  | 9   | RDR2-sensitive |
| TCGGAAAAGCGGCTCGGCTCGGCT  | 0  | 10  | RDR2-sensitive |
| TCGGAAAAGCGGCTTGACTCGGCT  | 0  | 11  | RDR2-sensitive |
| TCGGAAACGGTATTTATTCGGTAA  | 5  | 100 | RDR2-sensitive |

|                           |    |    |                |
|---------------------------|----|----|----------------|
| TCGGAACACTCTAAGCCTCGGCAT  | 0  | 24 | RDR2-sensitive |
| TCGGAACAGAGGTGTTGGCGAGAG  | 0  | 10 | RDR2-sensitive |
| TCGGAACCACTCGGGACGGAAGAA  | 0  | 10 | RDR2-sensitive |
| TCGGAACCCAGAACACGCGCACAC  | 0  | 10 | RDR2-sensitive |
| TCGGAACCGGGTCGGGAACGGCGC  | 21 | 74 | RDR2-sensitive |
| TCGGAACCGGGTCGGGAATGGCGC  | 3  | 20 | RDR2-sensitive |
| TCGGAACTGAAGTCGGGTACCCGC  | 0  | 9  | RDR2-sensitive |
| TCGGAAGAACCAGTCGGAGCGCGT  | 0  | 12 | RDR2-sensitive |
| TCGGAAGGAGGCTAGTAGGAACGG  | 0  | 18 | RDR2-sensitive |
| TCGGAAGTTAAGCCCTCCCGTCGG  | 0  | 9  | RDR2-sensitive |
| TCGGAATTGAACTGGATTTGGTAT  | 0  | 21 | RDR2-sensitive |
| TCGGAATTGGAGAGTGGAGGCGTG  | 0  | 9  | RDR2-sensitive |
| TCGGAATTTTAGATCGGAATCGGT  | 0  | 10 | RDR2-sensitive |
| TCGGAATTTTCTATCGGAATCGGT  | 1  | 13 | RDR2-sensitive |
| TCGGACAAGAACTAGGCACGGTG   | 0  | 19 | RDR2-sensitive |
| TCGGACACTCGGCAAGACTTTTGC  | 0  | 23 | RDR2-sensitive |
| TCGGACAGAAAAGTCCACGGTT    | 0  | 13 | RDR2-sensitive |
| TCGGACAGGAACTAGGCACGGTG   | 1  | 36 | RDR2-sensitive |
| TCGGACAGGAAATTAGGCACGGTG  | 0  | 17 | RDR2-sensitive |
| TCGGACATAAGGCCTACGTCTGAC  | 0  | 12 | RDR2-sensitive |
| TCGGACATACGATGGTGGCGTCCC  | 0  | 9  | RDR2-sensitive |
| TCGGACCAGGCTTCATTCTTTTT   | 16 | 0  | RDR2-resistant |
| TCGGACCAGGCTTCATTCTTTTT   | 17 | 0  | RDR2-resistant |
| TCGGACCAGGCTTCATTTTTTTTT  | 15 | 0  | RDR2-resistant |
| TCGGACCCTCTGGAGGATCGCGGA  | 1  | 20 | RDR2-sensitive |
| TCGGACCGACATGAATAAGCGGAC  | 0  | 12 | RDR2-sensitive |
| TCGGACCGGACTAGCACGAATTGC  | 0  | 12 | RDR2-sensitive |
| TCGGACCTCGGTTGACGACGAGAC  | 0  | 13 | RDR2-sensitive |
| TCGGACGAAGGTCGTGAAAGACGT  | 2  | 28 | RDR2-sensitive |
| TCGGACGATCCGCACTGGTGGCGT  | 0  | 22 | RDR2-sensitive |
| TCGGACGGTACTCCGAAGCGGCAA  | 0  | 9  | RDR2-sensitive |
| TCGGACTATCCGTCGTAGCGGCGT  | 0  | 21 | RDR2-sensitive |
| TCGGACTCATTTTCGGACGGCCAA  | 0  | 15 | RDR2-sensitive |
| TCGGACTTTTTTTCAATTGGTTGC  | 17 | 0  | RDR2-resistant |
| TCGGAGACGACGACTGGCACGCAC  | 0  | 9  | RDR2-sensitive |
| TCGGAGCCCGTGGACTGGCACGAC  | 0  | 10 | RDR2-sensitive |
| TCGGAGCGCATGGGAGGGTATGAT  | 0  | 9  | RDR2-sensitive |
| TCGGAGCTGTCGACGGAAGACCAA  | 0  | 15 | RDR2-sensitive |
| TCGGAGGAAGGCAGATTGTAGCAC  | 0  | 9  | RDR2-sensitive |
| TCGGAGGATGTCATGCGGATCGT   | 1  | 13 | RDR2-sensitive |
| TCGGAGGCACGATAGGCTTGTCAT  | 0  | 12 | RDR2-sensitive |
| TCGGAGGCAGACCAAACGTAGGC   | 61 | 5  | RDR2-resistant |
| TCGGAGGCATCACGTAGAGACCGG  | 0  | 10 | RDR2-sensitive |
| TCGGAGTGTGTACGCGGAGGGCGC  | 0  | 47 | RDR2-sensitive |
| TCGGAGTTTGAAGCTAGAGGTGTC  | 51 | 1  | RDR2-resistant |
| TCGGATAACAAGATCGGATACGGTT | 0  | 12 | RDR2-sensitive |
| TCGGATACAGGATCGGATACGGAT  | 0  | 11 | RDR2-sensitive |
| TCGGATACGGATAGTTAGAAACGG  | 0  | 54 | RDR2-sensitive |
| TCGGATACGGGACCAGATACGGGT  | 0  | 22 | RDR2-sensitive |

|                           |    |     |                |
|---------------------------|----|-----|----------------|
| TCGGATACGGGTACCAAACGGGA   | 0  | 12  | RDR2-sensitive |
| TCGGATACGGGTAGGATACAGGAT  | 0  | 15  | RDR2-sensitive |
| TCGGATACGGGTAGGATACGGAAT  | 3  | 123 | RDR2-sensitive |
| TCGGATACTTGTCGGATAATGCAT  | 1  | 20  | RDR2-sensitive |
| TCGGATAGAACGGTGGCAGAACAG  | 1  | 17  | RDR2-sensitive |
| TCGGATAGGAACTAAGCACGGTGA  | 0  | 9   | RDR2-sensitive |
| TCGGATATCGGATACTTGTCGGAT  | 0  | 14  | RDR2-sensitive |
| TCGGATATCTGATCCGACGGATAA  | 0  | 17  | RDR2-sensitive |
| TCGGATCATGAGCATAACAGAGCAT | 0  | 15  | RDR2-sensitive |
| TCGGATCCAACGGTCGACTGCTAC  | 0  | 10  | RDR2-sensitive |
| TCGGATCCCTGACAGTAGGAGCAT  | 1  | 14  | RDR2-sensitive |
| TCGGATCCGGGCAAGAAACGACAT  | 0  | 14  | RDR2-sensitive |
| TCGGATCCGGGCAAGAAACGACGG  | 1  | 15  | RDR2-sensitive |
| TCGGATCCTGAGAGAAGAGGTCGC  | 0  | 9   | RDR2-sensitive |
| TCGGATCCTGCCCGGGCTCGTCTGT | 0  | 9   | RDR2-sensitive |
| TCGGATCGCGGGCAGCGGGGGCGGT | 46 | 3   | RDR2-resistant |
| TCGGATCGCTCCCGTTGAGTCGGA  | 0  | 10  | RDR2-sensitive |
| TCGGATCTGGCATATTTTTCAAAT  | 32 | 3   | RDR2-resistant |
| TCGGATCTTGGCAACAACACGGAC  | 0  | 18  | RDR2-sensitive |
| TCGGATCTTGGCAACGACGCGCAC  | 2  | 30  | RDR2-sensitive |
| TCGGATGACTCAGAACAGCCGGGT  | 1  | 15  | RDR2-sensitive |
| TCGGATGATGAGCAGGTGGGGGTC  | 0  | 12  | RDR2-sensitive |
| TCGGATGCAAGACCTGCGGCAGGT  | 0  | 16  | RDR2-sensitive |
| TCGGATGCGAACGAGCGAGGACAA  | 0  | 9   | RDR2-sensitive |
| TCGGATGTCATCGGCGGTTCTCTC  | 18 | 55  | RDR2-sensitive |
| TCGGATTCTGTAGTGCCAGAGA    | 0  | 13  | RDR2-sensitive |
| TCGGATTCTGAATTCGAATACGGAT | 0  | 11  | RDR2-sensitive |
| TCGGATTCTGGGTCAGATACGGAAC | 0  | 10  | RDR2-sensitive |
| TCGGATTCTGGGTCGGATACGGAAC | 0  | 17  | RDR2-sensitive |
| TCGGATTCTGGGTCGGATACGGAGC | 2  | 59  | RDR2-sensitive |
| TCGGATTGTCCGCCGTAGCGGCGC  | 0  | 22  | RDR2-sensitive |
| TCGGATTGTGTCTCTACACGGTGT  | 0  | 9   | RDR2-sensitive |
| TCGGATTTCTGACGGGTTTCGGAT  | 0  | 24  | RDR2-sensitive |
| TCGGATTTCTATATATGCAGATGA  | 26 | 0   | RDR2-resistant |
| TCGGATTTGGACCAGACATGACGG  | 0  | 9   | RDR2-sensitive |
| TCGGCAAAGAACCTAAGCCGGTGC  | 0  | 16  | RDR2-sensitive |
| TCGGCAAAGAACCTATACCGGTGC  | 0  | 9   | RDR2-sensitive |
| TCGGCAAAGAACGCGATTCCGGTA  | 2  | 106 | RDR2-sensitive |
| TCGGCAAAGAACGCGATTCCGGTT  | 0  | 18  | RDR2-sensitive |
| TCGGCAAAGAATATGCACTCGGC   | 0  | 11  | RDR2-sensitive |
| TCGGCAAAGACTCGGATTCCGGTA  | 0  | 12  | RDR2-sensitive |
| TCGGCAAAGACTCGGATTCCGGCT  | 0  | 13  | RDR2-sensitive |
| TCGGCAAAGACTGGTCTAGTGGAC  | 0  | 10  | RDR2-sensitive |
| TCGGCAAAGAGCACAGACCTGGGC  | 0  | 11  | RDR2-sensitive |
| TCGGCAAAGAGCCTGTTTCCGGTA  | 0  | 12  | RDR2-sensitive |
| TCGGCAAAGATTGCAACTCGGC    | 0  | 10  | RDR2-sensitive |
| TCGGCAAAGCCTCGGATTCCGGTA  | 2  | 55  | RDR2-sensitive |
| TCGGCAAAGCCTGCGATTCCGGTA  | 0  | 11  | RDR2-sensitive |
| TCGGCAAAGCCTTGGATTCCGGTA  | 0  | 19  | RDR2-sensitive |

|                           |    |     |                |
|---------------------------|----|-----|----------------|
| TCGGCAAAGCGTACTGCACTCGGC  | 0  | 15  | RDR2-sensitive |
| TCGGCAAAGGAGCTGTGTCCGGTA  | 0  | 13  | RDR2-sensitive |
| TCGGCAAAGGCGCGAATTCCGGTA  | 1  | 13  | RDR2-sensitive |
| TCGGCAAAGGCTCGGATTCCGGTA  | 0  | 32  | RDR2-sensitive |
| TCGGCAAAGGCTCTGATTCCGGTA  | 3  | 32  | RDR2-sensitive |
| TCGGCAAAGTCTCGGATTCCGGTA  | 0  | 23  | RDR2-sensitive |
| TCGGCAACGTCCTGCGCTCGGTAA  | 0  | 9   | RDR2-sensitive |
| TCGGCAAGGAACGCTCAACACGGA  | 0  | 18  | RDR2-sensitive |
| TCGGCACAACCAAGCACTCGGCAA  | 1  | 21  | RDR2-sensitive |
| TCGGCACAACGCAGCATTGACAA   | 0  | 12  | RDR2-sensitive |
| TCGGCACAAGACACCACTCGGCAA  | 1  | 12  | RDR2-sensitive |
| TCGGCACAGAAACACACTCGGCAA  | 2  | 16  | RDR2-sensitive |
| TCGGCACAGAAAGACACTAGGCAA  | 0  | 9   | RDR2-sensitive |
| TCGGCACAGAAAGACACTCGGCAA  | 0  | 10  | RDR2-sensitive |
| TCGGCACAGAAATACACTCGGCAA  | 6  | 52  | RDR2-sensitive |
| TCGGCACAGAACGCACACTCGGCAA | 3  | 47  | RDR2-sensitive |
| TCGGCACAGAACGGCACTCGGCAA  | 4  | 77  | RDR2-sensitive |
| TCGGCACAGAACGGCACTTGGCAA  | 0  | 16  | RDR2-sensitive |
| TCGGCACAGAACTACACTCGGCAA  | 0  | 12  | RDR2-sensitive |
| TCGGCACAGAACTCCACTCGGCAA  | 0  | 9   | RDR2-sensitive |
| TCGGCACAGACAAGCACTCGGCAA  | 1  | 22  | RDR2-sensitive |
| TCGGCACAGAGAAACACTCGGCAA  | 2  | 44  | RDR2-sensitive |
| TCGGCACAGAGGAACACTCGGCAA  | 0  | 19  | RDR2-sensitive |
| TCGGCACAGCCAAGCACTCGGCAA  | 35 | 225 | RDR2-sensitive |
| TCGGCACAGCCCAGCACTCGGCAA  | 2  | 24  | RDR2-sensitive |
| TCGGCACAGCGAAGCACTCGGCAA  | 2  | 22  | RDR2-sensitive |
| TCGGCACAGGAATACACTCGGCAA  | 0  | 44  | RDR2-sensitive |
| TCGGCACAGGACAACACTCGGCAA  | 7  | 43  | RDR2-sensitive |
| TCGGCACAGGACAGCACTCGGCAA  | 4  | 40  | RDR2-sensitive |
| TCGGCACAGGACCACACTCGGCAA  | 4  | 47  | RDR2-sensitive |
| TCGGCACAGGACCCCACTCGGCAA  | 8  | 122 | RDR2-sensitive |
| TCGGCACAGGACCCCACTCGGTAA  | 0  | 10  | RDR2-sensitive |
| TCGGCACAGGACGACACTCGGCAA  | 9  | 139 | RDR2-sensitive |
| TCGGCACAGGACGACACTCGGTAA  | 0  | 9   | RDR2-sensitive |
| TCGGCACAGGACGCACTTGGCAA   | 0  | 11  | RDR2-sensitive |
| TCGGCACAGGACGGCACTCGGCAA  | 10 | 74  | RDR2-sensitive |
| TCGGCACAGGACGGCGCTCAGTAA  | 0  | 12  | RDR2-sensitive |
| TCGGCACAGGACTCCACTCGGCAA  | 0  | 10  | RDR2-sensitive |
| TCGGCACAGGATCCCACTCGGCAA  | 0  | 9   | RDR2-sensitive |
| TCGGCACAGGGCGCACTCGGCAA   | 1  | 18  | RDR2-sensitive |
| TCGGCACAGGGCGGCACTCGGCAA  | 2  | 23  | RDR2-sensitive |
| TCGGCACAGGTAGGCACTCGGCAA  | 8  | 87  | RDR2-sensitive |
| TCGGCACAGTCAAGCACTCGGCAA  | 0  | 16  | RDR2-sensitive |
| TCGGCACATCCAAGCACTCGGCAA  | 3  | 41  | RDR2-sensitive |
| TCGGCACAGACGAAGACCGGGAC   | 0  | 10  | RDR2-sensitive |
| TCGGCACGCGAGCTCGACGCGCAC  | 0  | 13  | RDR2-sensitive |
| TCGGCACGGCACGACAACTCAC    | 0  | 11  | RDR2-sensitive |
| TCGGCACTGATAATTTGTTCCGGCG | 0  | 15  | RDR2-sensitive |
| TCGGCACTGTAGGTCGGCTTGCCT  | 1  | 94  | RDR2-sensitive |

|                          |     |     |                |
|--------------------------|-----|-----|----------------|
| TCGGCAGAGGACAGCACTCGGCAA | 11  | 155 | RDR2-sensitive |
| TCGGCAGAGTGACTGGTTGGATAG | 0   | 17  | RDR2-sensitive |
| TCGGCAGGTCACACTAGGACGGAT | 0   | 9   | RDR2-sensitive |
| TCGGCAGTGGATCCGTGACCCGGC | 0   | 12  | RDR2-sensitive |
| TCGGCATACGAAGACACTCGGTAA | 0   | 15  | RDR2-sensitive |
| TCGGCATAGAACGACACTCGGCAA | 2   | 20  | RDR2-sensitive |
| TCGGCATAGAACGACGCTCGGCAA | 0   | 9   | RDR2-sensitive |
| TCGGCATAGACACACTCGGCAA   | 0   | 13  | RDR2-sensitive |
| TCGGCATAGACAGACTCGGCAA   | 0   | 18  | RDR2-sensitive |
| TCGGCATAGAGAAACTCGGCAA   | 0   | 11  | RDR2-sensitive |
| TCGGCATAGAGAAGCACTCGGCAA | 0   | 19  | RDR2-sensitive |
| TCGGCATAGCGAAGCACTCGGCAA | 0   | 9   | RDR2-sensitive |
| TCGGCATAGGACCACACTCGGCAA | 1   | 19  | RDR2-sensitive |
| TCGGCATAGGACCCCACTCGGCAA | 3   | 19  | RDR2-sensitive |
| TCGGCATAGGTAGACTCGGCAC   | 6   | 31  | RDR2-sensitive |
| TCGGCATAGTTAACGATCGGCGTT | 0   | 11  | RDR2-sensitive |
| TCGGCATATAAGGACACTCGGCAA | 0   | 11  | RDR2-sensitive |
| TCGGCATATACTGACGCTCGGCAA | 1   | 20  | RDR2-sensitive |
| TCGGCATATCCAGACTCGGCCA   | 0   | 29  | RDR2-sensitive |
| TCGGCATCTGTTTTTCTGCGGCT  | 155 | 9   | RDR2-resistant |
| TCGGCATGGACACAAGCTGACGAC | 0   | 60  | RDR2-sensitive |
| TCGGCATGGATACAAGCTGACGAC | 1   | 14  | RDR2-sensitive |
| TCGGCATGTGGAGACCAAGCTCGG | 0   | 10  | RDR2-sensitive |
| TCGGCCACGGAAGACAGACTCGAC | 24  | 2   | RDR2-resistant |
| TCGGCCACGTCAGTCTGTCTCGT  | 0   | 20  | RDR2-sensitive |
| TCGGCCAGCCGTCGGAAATAAGTC | 0   | 11  | RDR2-sensitive |
| TCGGCCCCGGAAGACGACGAACTC | 2   | 18  | RDR2-sensitive |
| TCGGCCTCGCAGCTGGACATGGCC | 47  | 6   | RDR2-resistant |
| TCGGCGAAATGTGACCCTCGGCAT | 0   | 15  | RDR2-sensitive |
| TCGGCGAACAAGACACTCGGCAC  | 0   | 11  | RDR2-sensitive |
| TCGGCGAACACAGACGAACTGCAA | 0   | 11  | RDR2-sensitive |
| TCGGCGAACGACAACACTCGGTAT | 0   | 21  | RDR2-sensitive |
| TCGGCGAACTGTACATCGGCAACA | 0   | 14  | RDR2-sensitive |
| TCGGCGAAGGACGGCTCTCGGCAA | 1   | 25  | RDR2-sensitive |
| TCGGCGAAGGGCTGGACGAAGCAT | 0   | 9   | RDR2-sensitive |
| TCGGCGAATGACGGTCCTCGGCAA | 0   | 11  | RDR2-sensitive |
| TCGGCGACGACGAACTTTACGGTG | 0   | 9   | RDR2-sensitive |
| TCGGCGCATAATGACTCGGCAT   | 1   | 22  | RDR2-sensitive |
| TCGGCGCGACGAACCTAGCGGTGC | 0   | 14  | RDR2-sensitive |
| TCGGCGCGAGACGGAACACAAGGA | 0   | 12  | RDR2-sensitive |
| TCGGCGCGAGACGGAACACAAGGG | 3   | 16  | RDR2-sensitive |
| TCGGCGCTAGAACAGAGCGGTCCG | 0   | 33  | RDR2-sensitive |
| TCGGCGTAGCCTGCACACGCGGAT | 0   | 11  | RDR2-sensitive |
| TCGGCGTAGTAGCGGATTTCCAG  | 0   | 12  | RDR2-sensitive |
| TCGGCTAACCGACGGAACGGACGG | 0   | 10  | RDR2-sensitive |
| TCGGCTAACGGGCTGACCCGGCAC | 0   | 9   | RDR2-sensitive |
| TCGGCTAAGCATGTTTGAATGGCT | 18  | 1   | RDR2-resistant |
| TCGGCTAGACGATAGGCTGACGGC | 0   | 9   | RDR2-sensitive |
| TCGGCTCGAACCGGCTCGACGCTC | 0   | 9   | RDR2-sensitive |

|                           |    |     |                |
|---------------------------|----|-----|----------------|
| TCGGCTCGACGGCCAGGATCTCGG  | 0  | 12  | RDR2-sensitive |
| TCGGCTCGACTCGGCTCGTTTCAA  | 0  | 33  | RDR2-sensitive |
| TCGGCTCGCGAGGCATACCCTGAT  | 1  | 12  | RDR2-sensitive |
| TCGGCTCGCTCTGGGCTCGCGGCC  | 0  | 10  | RDR2-sensitive |
| TCGGCTCGGATCGGCTCGATAGAA  | 0  | 39  | RDR2-sensitive |
| TCGGCTCGGATCGGCTCGTTTGAA  | 2  | 77  | RDR2-sensitive |
| TCGGCTCGGCTCGGACCGGCTCGA  | 0  | 15  | RDR2-sensitive |
| TCGGCTCGGCTCGGAGCGGCTCGC  | 1  | 16  | RDR2-sensitive |
| TCGGCTCGGCTCGGATCGGCTCGA  | 0  | 9   | RDR2-sensitive |
| TCGGCTCGGCTCGGATCGGCTCGT  | 1  | 27  | RDR2-sensitive |
| TCGGCTCGGCTTGGATCGGTTTCGT | 0  | 38  | RDR2-sensitive |
| TCGGCTCGGGCTCGTTCAAGCGT   | 0  | 9   | RDR2-sensitive |
| TCGGCTCTCGGCAAAGACTGACGG  | 1  | 29  | RDR2-sensitive |
| TCGGCTCTGTCTGACTGAAGGGCGC | 4  | 39  | RDR2-sensitive |
| TCGGCTCTGTCTGACTGGAGGGCGC | 0  | 12  | RDR2-sensitive |
| TCGGCTCTGTCTGACTGGAGGGCGT | 6  | 31  | RDR2-sensitive |
| TCGGCTCTGTGACGTGTGAGCGGC  | 1  | 21  | RDR2-sensitive |
| TCGGCTGACTGACGAAGAGACAGG  | 0  | 11  | RDR2-sensitive |
| TCGGCTGAGATGGCGACTTTAGGT  | 50 | 3   | RDR2-resistant |
| TCGGCTGCTCGTGGCGTAAACCAG  | 0  | 11  | RDR2-sensitive |
| TCGGCTGCTGTGGACAGAAGCTGG  | 0  | 12  | RDR2-sensitive |
| TCGGCTGGGTGGAACGGTTGGCTC  | 0  | 9   | RDR2-sensitive |
| TCGGCTTAGAAAGACTCGGCAT    | 0  | 25  | RDR2-sensitive |
| TCGGCTTGGATCGGCTCGTTTGAA  | 0  | 9   | RDR2-sensitive |
| TCGGCTTGTAGGGTCGGCCTAGGC  | 0  | 9   | RDR2-sensitive |
| TCGGCTTTCGCTCTGGCCGACGGG  | 0  | 9   | RDR2-sensitive |
| TCGGGAAACTCCAACGGCTAGTCC  | 1  | 24  | RDR2-sensitive |
| TCGGGAACACAAGACTAGGCCTAT  | 15 | 0   | RDR2-resistant |
| TCGGGAACAGAAACGGGAGCGGGA  | 0  | 10  | RDR2-sensitive |
| TCGGGAACCAGGCTGTGGGCGTGC  | 0  | 29  | RDR2-sensitive |
| TCGGGAACGGAAACGGGAGCGGGA  | 0  | 16  | RDR2-sensitive |
| TCGGGACCGGATACGGATAGTTAG  | 0  | 22  | RDR2-sensitive |
| TCGGGACCGGTTCTTACGCTTCTC  | 47 | 1   | RDR2-resistant |
| TCGGGACCTGGACGCAGGAGCGAC  | 0  | 20  | RDR2-sensitive |
| TCGGGACGCATTGGACGGGCTTAG  | 0  | 11  | RDR2-sensitive |
| TCGGGACGGATACAGGACGGGACC  | 0  | 22  | RDR2-sensitive |
| TCGGGACGGATACGGGTAATACCC  | 4  | 76  | RDR2-sensitive |
| TCGGGACGGATACGGGTAATACCT  | 0  | 9   | RDR2-sensitive |
| TCGGGACGGATACGGGTAGTACCT  | 0  | 25  | RDR2-sensitive |
| TCGGGACGGATACGGGTATTACCC  | 0  | 9   | RDR2-sensitive |
| TCGGGAGCCAGGCTGTGCACGTGC  | 1  | 21  | RDR2-sensitive |
| TCGGGATCGGATACGGATAGTTAG  | 0  | 14  | RDR2-sensitive |
| TCGGGATCTCGGCGTAGTAGCGGA  | 0  | 21  | RDR2-sensitive |
| TCGGGCACCTAAGCAGGAACACGA  | 0  | 9   | RDR2-sensitive |
| TCGGGCACTCGGCAAAGAACGGTT  | 0  | 10  | RDR2-sensitive |
| TCGGGCACTCGGCAAAGAAGGCTT  | 41 | 138 | RDR2-sensitive |
| TCGGGCACTCGGCAAAGACAGCTT  | 0  | 10  | RDR2-sensitive |
| TCGGGCACTCGGCAAAGACGTCTT  | 0  | 11  | RDR2-sensitive |
| TCGGGCACTCGGCAAAGAGGTCGG  | 0  | 9   | RDR2-sensitive |

|                           |     |    |                |
|---------------------------|-----|----|----------------|
| TCGGGCCACGGGGAACAAGACCGG  | 0   | 12 | RDR2-sensitive |
| TCGGGCCGCAGAGAACAAGACCGG  | 5   | 51 | RDR2-sensitive |
| TCGGGCCGCAGGGAACAAGACCGG  | 1   | 20 | RDR2-sensitive |
| TCGGGCCGCTTAGAGATGCGTAAC  | 5   | 23 | RDR2-sensitive |
| TCGGGCCGGCTAAGCAGAACAGAT  | 0   | 12 | RDR2-sensitive |
| TCGGGCCTAGACCAGTACCGTCGT  | 0   | 10 | RDR2-sensitive |
| TCGGGCCTAGTCCAGCACTGACGG  | 3   | 21 | RDR2-sensitive |
| TCGGGCGAGACGGAAATCCTCCGG  | 0   | 12 | RDR2-sensitive |
| TCGGGCGAGCCGGAGATGTGTCCG  | 0   | 15 | RDR2-sensitive |
| TCGGGCGAGGCGGAGTTTCGTCGT  | 0   | 11 | RDR2-sensitive |
| TCGGGCGGCCACCAAGACAGCATG  | 135 | 13 | RDR2-resistant |
| TCGGGCGTGCTCTGTAGACGTGAT  | 1   | 20 | RDR2-sensitive |
| TCGGGCTCCGGACGGTGTGTGCGG  | 0   | 10 | RDR2-sensitive |
| TCGGGCTCCTGCACCAGGTCGCGG  | 1   | 18 | RDR2-sensitive |
| TCGGGCTCCTGTTTGATAAGGCAC  | 1   | 15 | RDR2-sensitive |
| TCGGGCTCGTTCTGAGCGTCGAGC  | 0   | 10 | RDR2-sensitive |
| TCGGGCTCTCGGCAACAAGGTCTC  | 0   | 10 | RDR2-sensitive |
| TCGGGCTCTCGGCGTATACCGCGT  | 0   | 21 | RDR2-sensitive |
| TCGGGCTGACACAGCACGGCTCAA  | 0   | 18 | RDR2-sensitive |
| TCGGGCTGCTGCAAGGTGTAACAC  | 0   | 10 | RDR2-sensitive |
| TCGGGCTGGCACAGCATAACACAA  | 0   | 9  | RDR2-sensitive |
| TCGGGCTGGCACGGCACGACCCAA  | 0   | 11 | RDR2-sensitive |
| TCGGGCTGGCACGGCATGGCTCAA  | 0   | 11 | RDR2-sensitive |
| TCGGGCTGGCACGGTACGACCCAA  | 0   | 14 | RDR2-sensitive |
| TCGGGCTGGCTCGCCAGAAACGAC  | 0   | 15 | RDR2-sensitive |
| TCGGGCTGGTGCCGTGGACGTCAC  | 0   | 13 | RDR2-sensitive |
| TCGGGCTGTACAGTGGGCTATCAA  | 0   | 34 | RDR2-sensitive |
| TCGGGCTTAGGCCAGGCCGGACGG  | 0   | 14 | RDR2-sensitive |
| TCGGGCTTATTACAGGCGTCCCAA  | 0   | 14 | RDR2-sensitive |
| TCGGGCTTCAAAGTGTCTGGGCCGG | 0   | 15 | RDR2-sensitive |
| TCGGGCTTGCTCGTCGTAGTCGGA  | 2   | 25 | RDR2-sensitive |
| TCGGGGACGGGAACAGGCTACCAT  | 0   | 9  | RDR2-sensitive |
| TCGGGGAGCGCTCTTGTTGTGGC   | 16  | 0  | RDR2-resistant |
| TCGGGGCTTGTGAGGATGGCCAGC  | 22  | 2  | RDR2-resistant |
| TCGGGGTATTAATGTAGTCGGAT   | 0   | 11 | RDR2-sensitive |
| TCGGGTCACGGAGAACAAGACCGG  | 5   | 54 | RDR2-sensitive |
| TCGGGTCATGTAGGTCGAGGTCGC  | 0   | 11 | RDR2-sensitive |
| TCGGGTCCGAGCAGAACGACACAC  | 0   | 23 | RDR2-sensitive |
| TCGGGTCCGAGGGCAAACGGACGG  | 0   | 12 | RDR2-sensitive |
| TCGGGTCCGATACGGGTACCCGGA  | 0   | 9  | RDR2-sensitive |
| TCGGGTCTTGCTAGTGTGCGGCTG  | 0   | 9  | RDR2-sensitive |
| TCGGGTGAGTAGCAAAGCGAAGAG  | 0   | 23 | RDR2-sensitive |
| TCGGGTGGACGGCGGTAAGAGCGA  | 0   | 11 | RDR2-sensitive |
| TCGGGTGGTTACAGATCGCAGGAG  | 0   | 14 | RDR2-sensitive |
| TCGGGTGGTTACAGATCGTAGGAG  | 0   | 13 | RDR2-sensitive |
| TCGGGTGTGGAGGAGGTGCCTTGC  | 17  | 1  | RDR2-resistant |
| TCGGGTTCCGGATCGGGTATGGTAA | 0   | 10 | RDR2-sensitive |
| TCGGGTTTTCCGGTTCGGGTTCCGG | 0   | 40 | RDR2-sensitive |
| TCGGTAAAACAACGGTCGGTCCGT  | 0   | 15 | RDR2-sensitive |



|                           |    |     |                |
|---------------------------|----|-----|----------------|
| TCGGTAAAGCTAGACTCTCGGCAA  | 0  | 27  | RDR2-sensitive |
| TCGGTAAAGCTAGGCTCTCGGCAA  | 3  | 24  | RDR2-sensitive |
| TCGGTAAAGCTCGGCTCTCGGCAA  | 0  | 11  | RDR2-sensitive |
| TCGGTAAAGTCAGGCTCTCGGCAA  | 0  | 12  | RDR2-sensitive |
| TCGGTAAAGTTAGGAACCCGGCAA  | 1  | 15  | RDR2-sensitive |
| TCGGTAAAGTTAGGCACTCGGCAA  | 0  | 9   | RDR2-sensitive |
| TCGGTAAAGTTAGGCGCTCGGCAA  | 4  | 29  | RDR2-sensitive |
| TCGGTAAAGTTAGGCTCTCGGCAA  | 8  | 78  | RDR2-sensitive |
| TCGGTAACGAACTCAATCCGGCGA  | 0  | 17  | RDR2-sensitive |
| TCGGTAACGAGGCTCGGCTCGGCT  | 0  | 27  | RDR2-sensitive |
| TCGGTAATCCTAGCGGACGAGCTT  | 1  | 19  | RDR2-sensitive |
| TCGGTAATGAGGCTCGGCTCGGCT  | 1  | 42  | RDR2-sensitive |
| TCGGTACAATGGTTCATACTTATA  | 18 | 0   | RDR2-resistant |
| TCGGTACAGGAAACCACTCGGCAA  | 0  | 10  | RDR2-sensitive |
| TCGGTACAGGACGACACTCGGCAA  | 1  | 24  | RDR2-sensitive |
| TCGGTACAGGGAAACACTCGGCAA  | 0  | 13  | RDR2-sensitive |
| TCGGTACAGGTCCACACTCGGCAA  | 1  | 23  | RDR2-sensitive |
| TCGGTACAGTTAGGCACTCGGCAA  | 0  | 10  | RDR2-sensitive |
| TCGGTACCACGTCGGCGCCACGAC  | 0  | 11  | RDR2-sensitive |
| TCGGTACGGATAATGGATCGGCTC  | 2  | 88  | RDR2-sensitive |
| TCGGTACGGATAATGGATCGGCTT  | 0  | 29  | RDR2-sensitive |
| TCGGTAGAACGAGCAGAGTAGCAA  | 0  | 23  | RDR2-sensitive |
| TCGGTAGACACTCGGCAAAGACGT  | 0  | 22  | RDR2-sensitive |
| TCGGTAGATTATAATGGCAATGGT  | 2  | 19  | RDR2-sensitive |
| TCGGTAGGACCTGGTCAGCCGGTC  | 0  | 11  | RDR2-sensitive |
| TCGGTAGGCAGGTTGCTCGGCAGC  | 0  | 11  | RDR2-sensitive |
| TCGGTAGTGCCCTCTCTGCGACGG  | 0  | 28  | RDR2-sensitive |
| TCGGTATCGACTGACATTCGGCAA  | 1  | 21  | RDR2-sensitive |
| TCGGTCACGCGCAGGATGACTTCT  | 0  | 13  | RDR2-sensitive |
| TCGGTCACTTACCGAGCTCGGTAA  | 1  | 12  | RDR2-sensitive |
| TCGGTCAGACAAGGCAGAACGCGG  | 0  | 12  | RDR2-sensitive |
| TCGGTCAGCTAGTGAGAGTTCCGG  | 0  | 15  | RDR2-sensitive |
| TCGGTCAGTCGGCTGGGCGAGCGT  | 0  | 12  | RDR2-sensitive |
| TCGGTCAGTGGAGCGGCGAAGTGA  | 3  | 21  | RDR2-sensitive |
| TCGGTCATGTGATCAGACTGCGT   | 0  | 10  | RDR2-sensitive |
| TCGGTCCACGGACAGATACGACAT  | 2  | 30  | RDR2-sensitive |
| TCGGTCCAGTATGAATATCCGGCC  | 0  | 13  | RDR2-sensitive |
| TCGGTCCATAAGTGAGCACGGCAC  | 0  | 14  | RDR2-sensitive |
| TCGGTCCATGCGAGTTTGTAGGTC  | 18 | 0   | RDR2-resistant |
| TCGGTCCTAGACTGTAGATGGCGA  | 0  | 12  | RDR2-sensitive |
| TCGGTCGTGCTGACGGATACAGAA  | 0  | 13  | RDR2-sensitive |
| TCGGTCTAGATCCAAGCGCGGGCG  | 51 | 3   | RDR2-resistant |
| TCGGTCTAGATGGATGTGTGCAGC  | 0  | 10  | RDR2-sensitive |
| TCGGTCTATTAGGATAATTCGGTT  | 0  | 12  | RDR2-sensitive |
| TCGGTCTATTAGGGTAATTCGGTT  | 1  | 84  | RDR2-sensitive |
| TCGGTCTATTCGAGTTCGGTTCGG  | 0  | 10  | RDR2-sensitive |
| TCGGTCTATTCGGGTTTCGGTTCGA | 0  | 15  | RDR2-sensitive |
| TCGGTCTATTCGGGTTTCGGTTCGG | 0  | 175 | RDR2-sensitive |
| TCGGTCTATTCGGGTTTCGGTTCGT | 0  | 10  | RDR2-sensitive |

|                           |     |    |                |
|---------------------------|-----|----|----------------|
| TCGGTCTCCGCCGCCGCCGTCGGC  | 34  | 0  | RDR2-resistant |
| TCGGTCTGAGCCTGGCAATGGCAT  | 0   | 13 | RDR2-sensitive |
| TCGGTCTGTTCCGGTTCGGTTCGG  | 1   | 20 | RDR2-sensitive |
| TCGGTCTTTGGGCTAAACGGGTAT  | 1   | 14 | RDR2-sensitive |
| TCGGTGAACGGGTTGGTCGGCAGC  | 0   | 14 | RDR2-sensitive |
| TCGGTGAAGCTAGACTCTCGGCAA  | 0   | 20 | RDR2-sensitive |
| TCGGTGAGTAGACGAGCCGAGCAG  | 0   | 9  | RDR2-sensitive |
| TCGGTGATTGCGAGACTCGGCCAG  | 0   | 22 | RDR2-sensitive |
| TCGGTGCAGGAAGATGTACGCTGT  | 1   | 31 | RDR2-sensitive |
| TCGGTGCCGGACGGTACGTGACCT  | 0   | 23 | RDR2-sensitive |
| TCGGTGCCTGAACGAGCTCGGCTA  | 0   | 9  | RDR2-sensitive |
| TCGGTGCCTGAACGAGCTCGGCTC  | 0   | 12 | RDR2-sensitive |
| TCGGTGCTCGGAACTAGACGGTCT  | 0   | 9  | RDR2-sensitive |
| TCGGTGGATTATAATGGCAATGGT  | 1   | 12 | RDR2-sensitive |
| TCGGTGGACAACCCGGACGTCGT   | 0   | 9  | RDR2-sensitive |
| TCGGTGGTGGGTCTCGAAGTCGGT  | 25  | 4  | RDR2-resistant |
| TCGGTGTCTGAACGAGCTCGGCTC  | 0   | 14 | RDR2-sensitive |
| TCGGTGTCTGGTACCTAGAAACGG  | 0   | 22 | RDR2-sensitive |
| TCGGTGTGGAGCGCAGCGTGGATA  | 15  | 0  | RDR2-resistant |
| TCGGTACTACGGAATGGAGGCCT   | 0   | 10 | RDR2-sensitive |
| TCGGTTAGGCTCCGGTAGGACGTC  | 0   | 10 | RDR2-sensitive |
| TCGGTTAGGTCATGTTAGTCGGGT  | 0   | 18 | RDR2-sensitive |
| TCGGTTCGGCTGTACGGGAAGCAT  | 3   | 55 | RDR2-sensitive |
| TCGGTTCGGGTTCCGGTTCGGTTT  | 0   | 12 | RDR2-sensitive |
| TCGGTTCGGTACGGTTCGGTTCGG  | 0   | 40 | RDR2-sensitive |
| TCGGTTCGGTCTATTCGGGTTTAT  | 0   | 9  | RDR2-sensitive |
| TCGGTTCGGTCTATTCGGGTTTGT  | 1   | 49 | RDR2-sensitive |
| TCGGTTCGGTCTATTCGGTCCACC  | 0   | 12 | RDR2-sensitive |
| TCGGTTCGGTCTATTCGGTTTTGT  | 0   | 16 | RDR2-sensitive |
| TCGGTTCGGTTCGGTACGGTTCGG  | 0   | 21 | RDR2-sensitive |
| TCGGTGGTTCTAGGACTGGGCGT   | 1   | 12 | RDR2-sensitive |
| TCGGTGTGTAGGGCTAGGATGGT   | 0   | 10 | RDR2-sensitive |
| TCGGTTTTCTCAGGAGCACGCACA  | 19  | 0  | RDR2-resistant |
| TCGGTTTTTTCGGTAGTTCGGTTC  | 0   | 10 | RDR2-sensitive |
| TCGTA AAAACGGGTCGCTCAAGTC | 15  | 0  | RDR2-resistant |
| TCGTA ACTCGGATGTATGTTGGTT | 355 | 15 | RDR2-resistant |
| TCGTA ACTCGTCCGACGACGGCAC | 1   | 77 | RDR2-sensitive |
| TCGTACACGGCTGGCAAAGTGGTT  | 21  | 0  | RDR2-resistant |
| TCGTACAGTAGGAAGTGAGACGTC  | 0   | 12 | RDR2-sensitive |
| TCGTACAGTAGGAAGTGAGGCGTC  | 2   | 42 | RDR2-sensitive |
| TCGTACAGTGGGAAGTGAGGCGTC  | 2   | 29 | RDR2-sensitive |
| TCGTACATCTTCTGCATCCGTTTT  | 32  | 0  | RDR2-resistant |
| TCGTACGAGGACGCAACAGATCAG  | 0   | 21 | RDR2-sensitive |
| TCGTACGTCGTGTGTAGAGATGGC  | 0   | 21 | RDR2-sensitive |
| TCGTACTGCGCGGATGAGGGCGTT  | 65  | 15 | RDR2-resistant |
| TCGTACTTATTTCCGACGGCTCAA  | 1   | 13 | RDR2-sensitive |
| TCGTAGAAACGGAGGCGTAGGCCGA | 0   | 12 | RDR2-sensitive |
| TCGTAGAGCAGGAGGGGAAGGGAA  | 0   | 16 | RDR2-sensitive |
| TCGTAGATCATGAACGCTATGCGG  | 0   | 16 | RDR2-sensitive |

|                           |    |     |                |
|---------------------------|----|-----|----------------|
| TCGTAGATTTGGCAACCGGAGCAC  | 0  | 18  | RDR2-sensitive |
| TCGTAGATTTTGGCATACTGACGT  | 0  | 10  | RDR2-sensitive |
| TCGTAGCACGAACGGTGGGCGCCA  | 0  | 9   | RDR2-sensitive |
| TCGTATGGAGCAGGTAGTCGAGAC  | 0  | 10  | RDR2-sensitive |
| TCGTATTGTGGAGCTGCATGGCAT  | 0  | 26  | RDR2-sensitive |
| TCGTCACTCCGGCGTACTCGACAA  | 0  | 9   | RDR2-sensitive |
| TCGTCCCGTTGGACAGACGTGCAC  | 0  | 12  | RDR2-sensitive |
| TCGTCTCGAGATTTATGAATGAC   | 28 | 3   | RDR2-resistant |
| TCGTGCAATCGGCGCAGAGGCTGC  | 10 | 46  | RDR2-sensitive |
| TCGTCTCGTCGAGGGCTTCGTCCG  | 0  | 13  | RDR2-sensitive |
| TCGTCTCGTCTTTAATCTTCGGC   | 0  | 17  | RDR2-sensitive |
| TCGTCTCTCTCCTGGTCGTGGATC  | 17 | 1   | RDR2-resistant |
| TCGTCTGAGTCCTGACGTGTCCGT  | 0  | 9   | RDR2-sensitive |
| TCGTGAACCAGATCGAGCTCAGAG  | 0  | 12  | RDR2-sensitive |
| TCGTGACAATTGAACGGGTGGCAC  | 2  | 354 | RDR2-sensitive |
| TCGTGACAATTGAACGGGTGGCCC  | 0  | 14  | RDR2-sensitive |
| TCGTGACTCGCATGATCAGCTCCG  | 0  | 12  | RDR2-sensitive |
| TCGTGACTCTGGACTAGACGGTTC  | 0  | 40  | RDR2-sensitive |
| TCGTGACTGAGCTGCCGGTAGCGT  | 0  | 10  | RDR2-sensitive |
| TCGTGACTGTTTCGGGCAACACAA  | 0  | 14  | RDR2-sensitive |
| TCGTGACTGTTTCGGGCAACACGG  | 2  | 61  | RDR2-sensitive |
| TCGTGACTGTTTCGGGTAACACGG  | 0  | 19  | RDR2-sensitive |
| TCGTGAGAGGTCTAGGTCGTCCGTC | 0  | 11  | RDR2-sensitive |
| TCGTGAGCCTTGTCGAGCCGAGCT  | 0  | 11  | RDR2-sensitive |
| TCGTGATATCGGAGGAGGGTTATT  | 26 | 1   | RDR2-resistant |
| TCGTGATCAACTCGGCTCGGCTGA  | 0  | 12  | RDR2-sensitive |
| TCGTGATCTCTGCGAGGACGAGAA  | 0  | 14  | RDR2-sensitive |
| TCGTGATCTTCTGACATCGTCGAC  | 3  | 29  | RDR2-sensitive |
| TCGTGATCTTCTGACCTCGTCGAC  | 0  | 16  | RDR2-sensitive |
| TCGTGCCCGGACACGGCTGACTGC  | 0  | 21  | RDR2-sensitive |
| TCGTGCCGGGCTTGGGATGGCCGT  | 0  | 19  | RDR2-sensitive |
| TCGTGCCGGGTCCGGCTTAGGCAC  | 0  | 9   | RDR2-sensitive |
| TCGTGCGACTGTCCGGTGAGGCCT  | 0  | 13  | RDR2-sensitive |
| TCGTGCGGAGGTATAGATGGCCAA  | 0  | 44  | RDR2-sensitive |
| TCGTGCGGAGGTATAGATGGTCAA  | 0  | 26  | RDR2-sensitive |
| TCGTGCGGATGTATAGATGGCCAA  | 0  | 19  | RDR2-sensitive |
| TCGTGCGTGGGAGCTCAGGCGGAT  | 0  | 10  | RDR2-sensitive |
| TCGTGCTAACGGACCGGCTCGGC   | 0  | 13  | RDR2-sensitive |
| TCGTGCTAACGCTACGATCATCGG  | 0  | 10  | RDR2-sensitive |
| TCGTGCTGATGAACCAGGAGCGGT  | 0  | 20  | RDR2-sensitive |
| TCGTGCTGATGGACCGGAGCGGT   | 1  | 18  | RDR2-sensitive |
| TCGTGCTGATGGACTGGGAGCGGT  | 0  | 10  | RDR2-sensitive |
| TCGTGCTGCCACACTAGTTCTGTC  | 23 | 0   | RDR2-resistant |
| TCGTGCTTCGTGCCGGGCTAACGG  | 0  | 9   | RDR2-sensitive |
| TCGTGCTTGGACAGGTAGGCCGGC  | 0  | 13  | RDR2-sensitive |
| TCGTGCTTGGACGAGGACACGGCG  | 14 | 0   | RDR2-resistant |
| TCGTGGAAGGCCAGGTAGAGCGGT  | 0  | 25  | RDR2-sensitive |
| TCGTGGACAGAGCATGGGCATGGA  | 0  | 15  | RDR2-sensitive |
| TCGTGGAGCCCTCTGGCAGACCGC  | 0  | 13  | RDR2-sensitive |

|                          |     |     |                |
|--------------------------|-----|-----|----------------|
| TCGTGGCAATTGAAATCGTGGCAT | 0   | 21  | RDR2-sensitive |
| TCGTGGCAATTGAACGGGTGGCAC | 3   | 241 | RDR2-sensitive |
| TCGTGGCAATTGAACGGGTGGCCC | 0   | 32  | RDR2-sensitive |
| TCGTGGCAATTGTAGGCGTGGCAT | 0   | 251 | RDR2-sensitive |
| TCGTGGCAATTGTAGGCGTGCCCT | 0   | 14  | RDR2-sensitive |
| TCGTGGGCCGGGCAAAGACTACAG | 0   | 10  | RDR2-sensitive |
| TCGTGGGCTCTCGGTGCGGTGCGT | 0   | 16  | RDR2-sensitive |
| TCGTGGGCTTCCATGGGTGCTCAC | 0   | 13  | RDR2-sensitive |
| TCGTGGTGATCTGTTGGAGGCCAG | 0   | 14  | RDR2-sensitive |
| TCGTGGTGCTTTTGGGTAGGACGG | 0   | 15  | RDR2-sensitive |
| TCGTGTATACAGACTCAGCGGTGC | 0   | 11  | RDR2-sensitive |
| TCGTGTCAGCTATGGAACGGTAA  | 0   | 13  | RDR2-sensitive |
| TCGTGTCAGCTGTGGAACGGTAA  | 3   | 182 | RDR2-sensitive |
| TCGTGTCAGCTGTGGATCGGTAA  | 0   | 10  | RDR2-sensitive |
| TCGTGTCAGCTGTGGATGCGGTAA | 0   | 10  | RDR2-sensitive |
| TCGTGTCAGCTGTTGAAACGGTAA | 0   | 39  | RDR2-sensitive |
| TCGTGTCGACTCTAGATAGGGCAG | 0   | 18  | RDR2-sensitive |
| TCGTGTCGGGCCTCGGCAGGCTTA | 1   | 12  | RDR2-sensitive |
| TCGTGTCTGCTGTGGAACGGTAA  | 0   | 57  | RDR2-sensitive |
| TCGTGTGGCTGGGACAGCAAGGTT | 0   | 9   | RDR2-sensitive |
| TCGTGTGTGAATCTGAGCGTCCGC | 305 | 19  | RDR2-resistant |
| TCGTGTGTGATGCAGGACGATCGT | 0   | 14  | RDR2-sensitive |
| TCGTTAAGGAACCGAGCCAGAGAA | 0   | 13  | RDR2-sensitive |
| TCGTTATCATCGGGCTTTGTGCGT | 0   | 10  | RDR2-sensitive |
| TCGTTATGTTAACAAGCTGAAGAT | 0   | 10  | RDR2-sensitive |
| TCGTTATGTTGTAGCTTCAGTGGC | 163 | 8   | RDR2-resistant |
| TCGTTTCGTCGGATCTTTCGGTAA | 0   | 9   | RDR2-sensitive |
| TCGTTCTTAGGCTCAGCGGCAATC | 23  | 1   | RDR2-resistant |
| TCGTTGGCTCACTCGGTTGATGGT | 0   | 10  | RDR2-sensitive |
| TCGTTGTAGCAGGAGCTGGAGAGT | 35  | 6   | RDR2-resistant |
| TCGTTGTAGCCTCCGCGTCGGAAA | 0   | 10  | RDR2-sensitive |
| TCGTTGTAGGATCTCGAAGACGAC | 0   | 23  | RDR2-sensitive |
| TCGTTGTATCGCACGAGACAGGCT | 0   | 31  | RDR2-sensitive |
| TCGTTGTATCTAGGATGCCGGACA | 0   | 9   | RDR2-sensitive |
| TCGTTGTCTGGGCTGTTTGTGCAT | 0   | 11  | RDR2-sensitive |
| TCGTTTACTGTAGTGTATGACGGA | 0   | 39  | RDR2-sensitive |
| TCGTTTAGGACAACGACACGGTCT | 0   | 13  | RDR2-sensitive |
| TCGTTTAGGACATGATTGTGCATA | 2   | 47  | RDR2-sensitive |
| TCGTTTAGTTAATGATCGGTTCCG | 0   | 58  | RDR2-sensitive |
| TCGTTTCTCTGTCCGAGCCCGGCT | 0   | 11  | RDR2-sensitive |
| TCGTTTCTGTGGAGCCAGGCTGAG | 0   | 9   | RDR2-sensitive |
| TCGTTTCTTTCGGAGTGGAGGCAT | 0   | 20  | RDR2-sensitive |
| TCGTTTTAGTTGTCGCTGGATAGT | 4   | 29  | RDR2-sensitive |
| TCGTTTTAGTTGTCGCTGGATGGT | 0   | 9   | RDR2-sensitive |
| TCGTTTTTTCGGACACTCGGCAA  | 0   | 22  | RDR2-sensitive |
| TCTAAACTCTGGGTGGAGCAGCT  | 0   | 28  | RDR2-sensitive |
| TCTAAACGACGTAGAGCCGGAGAG | 0   | 16  | RDR2-sensitive |
| TCTAAACTCTGGAGCAGAGCTGCT | 3   | 89  | RDR2-sensitive |
| TCTAAACTCTGGAGTAGAGCTGCT | 0   | 18  | RDR2-sensitive |

|                           |     |    |                |
|---------------------------|-----|----|----------------|
| TCTAAACTGCTAGATTCGCGACGG  | 0   | 9  | RDR2-sensitive |
| TCTAAACTTTAAAGTAGAGCTGCT  | 0   | 11 | RDR2-sensitive |
| TCTAAATATAGAATGTATGAGGCT  | 26  | 0  | RDR2-resistant |
| TCTAAATGTGGAGGGCTCCGGCAG  | 0   | 36 | RDR2-sensitive |
| TCTAAATTTAGAGGACGCTGCTGG  | 1   | 13 | RDR2-sensitive |
| TCTAACCATGTCTGGCGGATCTGC  | 0   | 9  | RDR2-sensitive |
| TCTAACCTAAAGTCGGGCGGGCAC  | 0   | 10 | RDR2-sensitive |
| TCTAACTGTAGCTTGGAGAGGCAT  | 0   | 17 | RDR2-sensitive |
| TCTAACTTGGCTGACATGGTGCTC  | 43  | 2  | RDR2-resistant |
| TCTAAGAATGACGATCACTAAACT  | 32  | 1  | RDR2-resistant |
| TCTAAGACACAACCTTAAGACACCC | 0   | 10 | RDR2-sensitive |
| TCTAAGTGGGAGAGTGGACGTCAT  | 0   | 15 | RDR2-sensitive |
| TCTAAGTTTTGGAGAGCTGACGTC  | 25  | 0  | RDR2-resistant |
| TCTAATACTGTAAGTTTCGACGGTT | 0   | 36 | RDR2-sensitive |
| TCTAATACTGTAAGTTTGACGGTT  | 0   | 20 | RDR2-sensitive |
| TCTAATATGACATGATGACGACGT  | 25  | 0  | RDR2-resistant |
| TCTAATGGACCAGATAGTTTGCTT  | 0   | 9  | RDR2-sensitive |
| TCTAATTGTGGTGGATGAATAGGC  | 28  | 0  | RDR2-resistant |
| TCTACAAGTATTGGGTGTGCTGAT  | 56  | 0  | RDR2-resistant |
| TCTACACTTATGCAAGGACTGCTC  | 0   | 16 | RDR2-sensitive |
| TCTACAGGCGCGGACCGTCCGGAC  | 0   | 12 | RDR2-sensitive |
| TCTACCCGTGGGTCTGTTATTGGA  | 0   | 9  | RDR2-sensitive |
| TCTACCCGTGGGTCTGTTATTGGC  | 2   | 17 | RDR2-sensitive |
| TCTACCGGATGGATGGGTCCGAAC  | 0   | 9  | RDR2-sensitive |
| TCTACCGTCCACCGCTCTGGAGGC  | 16  | 0  | RDR2-resistant |
| TCTACGACAGTATGGACGGTCCAC  | 0   | 19 | RDR2-sensitive |
| TCTACGACGGGTAGGGTAGGGCAT  | 0   | 9  | RDR2-sensitive |
| TCTACGACTTGAGCGACGACGCTG  | 0   | 10 | RDR2-sensitive |
| TCTACGCGAGACAGACGCACCTGC  | 0   | 14 | RDR2-sensitive |
| TCTACGCGGACCACAATGGCGCAT  | 0   | 10 | RDR2-sensitive |
| TCTACGGAAGCGCGGACGGTCCAC  | 0   | 10 | RDR2-sensitive |
| TCTACGGACTCCTCTGGCTGGCAC  | 0   | 14 | RDR2-sensitive |
| TCTACGGTTTTCGGTTGGGTGTCGG | 23  | 1  | RDR2-resistant |
| TCTACTGCTGACGGGAGGGAAGGG  | 0   | 31 | RDR2-sensitive |
| TCTACTGGAGAAGCCTACAATCAT  | 0   | 10 | RDR2-sensitive |
| TCTACTGTATGAAGCTAGCATGGC  | 0   | 16 | RDR2-sensitive |
| TCTACTGTTTATTTGTTTGGCAT   | 17  | 0  | RDR2-resistant |
| TCTACTTGGCTCGGCTCGACGGAT  | 0   | 9  | RDR2-sensitive |
| TCTAGAACATTTCGGCTGAGCACAC | 0   | 9  | RDR2-sensitive |
| TCTAGAACCGTCACTATAGAGGCT  | 2   | 14 | RDR2-sensitive |
| TCTAGAACGGACGGTCCGTGACCT  | 0   | 9  | RDR2-sensitive |
| TCTAGAACGGGCTCGACGAGAGGA  | 0   | 28 | RDR2-sensitive |
| TCTAGAACTCGCCCTCGAGATGG   | 0   | 12 | RDR2-sensitive |
| TCTAGAAGACGAAGGGTCCGGAG   | 0   | 19 | RDR2-sensitive |
| TCTAGAATGTTGCACAGGATTGTT  | 111 | 4  | RDR2-resistant |
| TCTAGACATGTCAGACTGCACCAG  | 0   | 21 | RDR2-sensitive |
| TCTAGACCGGCCTCTTCTTTTGA   | 14  | 0  | RDR2-resistant |
| TCTAGACTGCTGGGGCGTAATGGC  | 0   | 10 | RDR2-sensitive |
| TCTAGAGCGTATTGGACGGTTGAG  | 1   | 43 | RDR2-sensitive |

|                           |     |     |                |
|---------------------------|-----|-----|----------------|
| TCTAGAGCTGCGGTGAGGATTCCC  | 0   | 13  | RDR2-sensitive |
| TCTAGAGCTGTTTGCCTGGCGTT   | 2   | 65  | RDR2-sensitive |
| TCTAGATCCTGCACCGGGAGAGGG  | 2   | 17  | RDR2-sensitive |
| TCTAGATTGTATCGGTGCGTGAC   | 0   | 10  | RDR2-sensitive |
| TCTAGCACATGATAGGTCCGCCAT  | 0   | 11  | RDR2-sensitive |
| TCTAGCACGGCACAGATCTGGCAC  | 1   | 192 | RDR2-sensitive |
| TCTAGCAGTGGATGCAATAGCTCT  | 25  | 0   | RDR2-resistant |
| TCTAGCGACGTTGTATTTGATGAG  | 36  | 5   | RDR2-resistant |
| TCTAGCTGTGGGAGAATCTGGCT   | 0   | 9   | RDR2-sensitive |
| TCTAGCTTGTGCGAGCGGATGGACG | 0   | 20  | RDR2-sensitive |
| TCTAGGAACTCCGTCCGATCGCGG  | 0   | 10  | RDR2-sensitive |
| TCTAGGCTGTGAGAGTAGGGAGAC  | 0   | 21  | RDR2-sensitive |
| TCTAGGGCTGTGTGTTTGCGGTAC  | 0   | 10  | RDR2-sensitive |
| TCTAGTCAGCAATGAAGTCTGCTA  | 15  | 0   | RDR2-resistant |
| TCTAGTCAGGCGCGAACGGTCCGC  | 0   | 10  | RDR2-sensitive |
| TCTAGTCGATGATCAATGGCCACA  | 20  | 1   | RDR2-resistant |
| TCTAGTGGCATTGAACGGATCAAT  | 16  | 0   | RDR2-resistant |
| TCTAGTTGGGCGCATCAGGCGGTA  | 274 | 26  | RDR2-resistant |
| TCTATAAGACAATAGTGTAGACGT  | 0   | 10  | RDR2-sensitive |
| TCTATAAGACAGTAGTGTAGACGT  | 0   | 28  | RDR2-sensitive |
| TCTATAAGGACCGAGTGTGGGCGT  | 0   | 9   | RDR2-sensitive |
| TCTATAAGGCTGTAAGAAGGGCGT  | 0   | 9   | RDR2-sensitive |
| TCTATAATTTGTAGTCCGATGAT   | 0   | 23  | RDR2-sensitive |
| TCTATACGTGGATCGTTGATCGGA  | 35  | 1   | RDR2-resistant |
| TCTATACTACTAGGTTGTTCCGGC  | 0   | 38  | RDR2-sensitive |
| TCTATAGCGGTACGGACGGTCTGT  | 0   | 30  | RDR2-sensitive |
| TCTATATCAAGTTGGAAGTATGCT  | 42  | 1   | RDR2-resistant |
| TCTATATGTTAGCAGTGTAGACGT  | 0   | 10  | RDR2-sensitive |
| TCTATATTCGAGACAGGAGACTAT  | 2   | 18  | RDR2-sensitive |
| TCTATCATGCCACCGGACAGGCTT  | 54  | 0   | RDR2-resistant |
| TCTATCGCGTAGGACAGTTCGGCT  | 0   | 30  | RDR2-sensitive |
| TCTATCGTGTGTGCTGGGATGGT   | 0   | 13  | RDR2-sensitive |
| TCTATCTCGGATCTCATGGCGACT  | 32  | 0   | RDR2-resistant |
| TCTATCTCTGTAGCGTTCGGCATT  | 3   | 37  | RDR2-sensitive |
| TCTATGAAATGTGGGTCTGATGGC  | 0   | 21  | RDR2-sensitive |
| TCTATGACACTGAGCTGGACGGTC  | 0   | 9   | RDR2-sensitive |
| TCTATGACATGTGGGGCCAGTGGC  | 0   | 24  | RDR2-sensitive |
| TCTATGATATTAGAGATCTGACAG  | 0   | 10  | RDR2-sensitive |
| TCTATGATTTGTAGGCCCGATGGT  | 0   | 11  | RDR2-sensitive |
| TCTATGATTTGTGGATCCGATGGC  | 0   | 12  | RDR2-sensitive |
| TCTATGATTTGTGGGTCCGATGGC  | 1   | 86  | RDR2-sensitive |
| TCTATGCGGCGACGCGGACGGTTT  | 0   | 12  | RDR2-sensitive |
| TCTATGGATTGCAGCTGCAGCAAT  | 0   | 9   | RDR2-sensitive |
| TCTATGGATTGCAGCTGCAGCAGT  | 0   | 21  | RDR2-sensitive |
| TCTATGTCCGACGACTGGTGTTC   | 14  | 0   | RDR2-resistant |
| TCTATGTTAGAACTCCGGCGAGGA  | 21  | 0   | RDR2-resistant |
| TCTATGTTGAGACAGAAGACTAG   | 0   | 12  | RDR2-sensitive |
| TCTATGTTGAGACAGGAGACTAG   | 0   | 40  | RDR2-sensitive |
| TCTATGTTGAGACAGGAGACTAT   | 0   | 49  | RDR2-sensitive |

|                           |    |    |                |
|---------------------------|----|----|----------------|
| TCTATGTTTCGAGACAGGAGGCTAG | 0  | 30 | RDR2-sensitive |
| TCTATTATGTTGGACTTGGATGGT  | 0  | 12 | RDR2-sensitive |
| TCTATTCAGGGCAACATACTGGCT  | 0  | 9  | RDR2-sensitive |
| TCTCAAATTCATTGGGCAGAGACT  | 17 | 0  | RDR2-resistant |
| TCTCAACTCTGCCTTAACGACATG  | 33 | 7  | RDR2-resistant |
| TCTCACCCAATCGCCGGCGCGCAC  | 0  | 9  | RDR2-sensitive |
| TCTCACTTCCAGAAGGGACTCTAT  | 0  | 26 | RDR2-sensitive |
| TCTCAGACACTCGGCAAAGGCTAT  | 0  | 15 | RDR2-sensitive |
| TCTCAGCAGGTACGACGGACATTC  | 0  | 11 | RDR2-sensitive |
| TCTCAGCAGTCAGACACTCAGCAA  | 0  | 9  | RDR2-sensitive |
| TCTCAGCCTGGACCAGTTGAACGG  | 0  | 14 | RDR2-sensitive |
| TCTCAGCGAACTGTACATCGGCAA  | 0  | 42 | RDR2-sensitive |
| TCTCAGCTGAAGGTACTAGAGT    | 51 | 0  | RDR2-resistant |
| TCTCAGCTGGACCGGATACTACGC  | 0  | 10 | RDR2-sensitive |
| TCTCAGGAAACGGTGGAGCAACGC  | 0  | 11 | RDR2-sensitive |
| TCTCAGGCGGCCTATGGAGTGCAT  | 0  | 10 | RDR2-sensitive |
| TCTCAGGCTATGGACGCAGGGGCT  | 0  | 16 | RDR2-sensitive |
| TCTCAGGTACCACGGCTCAGCGT   | 16 | 0  | RDR2-resistant |
| TCTCAGTCATGAAGTAGGAGCCAG  | 50 | 2  | RDR2-resistant |
| TCTCAGTGCTGAAGCCGGACGGTC  | 0  | 10 | RDR2-sensitive |
| TCTCAGTGGATCGTGGCAGCAAGG  | 31 | 3  | RDR2-resistant |
| TCTCATAATATTTTAGCAAGTCGG  | 16 | 0  | RDR2-resistant |
| TCTCATCCATCGGGCTTCGCGCAT  | 0  | 9  | RDR2-sensitive |
| TCTCCACACATGCAGGCTGGACAC  | 0  | 65 | RDR2-sensitive |
| TCTCCACATATGCAGGCTGGACAC  | 0  | 17 | RDR2-sensitive |
| TCTCCACCACGCCGGCAGGTCCTC  | 1  | 12 | RDR2-sensitive |
| TCTCCACGGATGCAACGAACGGAT  | 0  | 11 | RDR2-sensitive |
| TCTCCAGCAGCGTCCTCTAAACGG  | 0  | 9  | RDR2-sensitive |
| TCTCCAGTTGGACTGTGCGGTTG   | 0  | 15 | RDR2-sensitive |
| TCTCCCAAGGACGTTCAATTTGAT  | 59 | 3  | RDR2-resistant |
| TCTCCCCACAGCTAGATTCTCGGA  | 0  | 12 | RDR2-sensitive |
| TCTCCCGTCAGCAGTAGAGGCGCA  | 1  | 13 | RDR2-sensitive |
| TCTCCCTGCAGGACCTTCGGCGAC  | 0  | 9  | RDR2-sensitive |
| TCTCCGAAGCGGACTGACGGTGTA  | 0  | 11 | RDR2-sensitive |
| TCTCCGACAGGTAGACGAGGACAG  | 0  | 9  | RDR2-sensitive |
| TCTCCGACGGATCTGTACGAGGCC  | 0  | 9  | RDR2-sensitive |
| TCTCCGACGGCTCTGTACGAGGCC  | 1  | 19 | RDR2-sensitive |
| TCTCCGACGGCTGTGTACGAGGCC  | 1  | 13 | RDR2-sensitive |
| TCTCCGACTGTTCCGACGGTAGCC  | 20 | 1  | RDR2-resistant |
| TCTCCGCGCGCTGTAGAAGGCACC  | 1  | 13 | RDR2-sensitive |
| TCTCCGGATGCAGGCTGGCGGCGT  | 4  | 39 | RDR2-sensitive |
| TCTCCGTCGATGGAAGGACGCCAT  | 22 | 1  | RDR2-resistant |
| TCTCCGTGAAGAGACGTCTCTGGC  | 0  | 9  | RDR2-sensitive |
| TCTCCGTTGACTGTCTACGGCTGC  | 61 | 0  | RDR2-resistant |
| TCTCCGTTTGGCAAGCAGAAGTGA  | 0  | 11 | RDR2-sensitive |
| TCTCCTAGTTGGGCTGAAACCGGC  | 0  | 15 | RDR2-sensitive |
| TCTCCTCGAAGGGTCGGACACGGA  | 0  | 9  | RDR2-sensitive |
| TCTCCTCGGGAGAGACTGGAGC    | 18 | 0  | RDR2-resistant |
| TCTCCTCTGCACGCTTTCGGACGG  | 0  | 13 | RDR2-sensitive |

|                          |    |    |                |
|--------------------------|----|----|----------------|
| TCTCCTGATCGCAGATGCACGTCT | 0  | 9  | RDR2-sensitive |
| TCTCCTGGGCACGGATAGGGGCAT | 23 | 0  | RDR2-resistant |
| TCTCCTTTGTAGAGCCACGTGCGT | 0  | 10 | RDR2-sensitive |
| TCTCGAACATAGAGCTAAGACACT | 0  | 17 | RDR2-sensitive |
| TCTCGACAGAGGGCGTAGGAGCAT | 2  | 52 | RDR2-sensitive |
| TCTCGACAGAGGGCGTATGAGCAT | 0  | 17 | RDR2-sensitive |
| TCTCGACGAACTGTACATCGGTAA | 0  | 12 | RDR2-sensitive |
| TCTCGACGACTGTACAGATTGCGT | 0  | 9  | RDR2-sensitive |
| TCTCGACGAGCTGTACATCGGCAA | 0  | 25 | RDR2-sensitive |
| TCTCGACGTGCAAGCTACTGGTAC | 0  | 11 | RDR2-sensitive |
| TCTCGAGACTGGCTTCGCCCTAA  | 0  | 14 | RDR2-sensitive |
| TCTCGAGGATTTGTAGTTACGGAT | 0  | 9  | RDR2-sensitive |
| TCTCGCGCCTAATCTGCTGACGGG | 0  | 18 | RDR2-sensitive |
| TCTCGCGTAGGAGAGTTCGGCTAG | 0  | 10 | RDR2-sensitive |
| TCTCGCTGCAGTCGCTGGTTTGAC | 0  | 13 | RDR2-sensitive |
| TCTCGGAACCACTCGGGACGGAAG | 0  | 11 | RDR2-sensitive |
| TCTCGGAACTTGGAGCAGAGTCAT | 0  | 15 | RDR2-sensitive |
| TCTCGGACACTCGGCATAGACTTT | 0  | 9  | RDR2-sensitive |
| TCTCGGACAGTCCGGTGGCTTCAC | 0  | 19 | RDR2-sensitive |
| TCTCGGACATAAGGCTACCTCCAA | 0  | 9  | RDR2-sensitive |
| TCTCGGACTCGGTCAAGGCCAGAC | 1  | 13 | RDR2-sensitive |
| TCTCGGAGCAGATGTAGAAGCGGC | 0  | 9  | RDR2-sensitive |
| TCTCGGATACGGGACCAGATACGG | 1  | 20 | RDR2-sensitive |
| TCTCGGATACGGGTAGGATACGGA | 0  | 10 | RDR2-sensitive |
| TCTCGGCAAAGGACGGCGGCTGT  | 0  | 9  | RDR2-sensitive |
| TCTCGGCAAAGACTGACGACCGTC | 0  | 10 | RDR2-sensitive |
| TCTCGGCAAAGACTGACGGCCGTC | 3  | 53 | RDR2-sensitive |
| TCTCGGCAAAGGGCGTGGGAGCAG | 0  | 10 | RDR2-sensitive |
| TCTCGGCACAGACAGACACTCGGC | 0  | 10 | RDR2-sensitive |
| TCTCGGCACAGAAAACACTCGGC  | 0  | 12 | RDR2-sensitive |
| TCTCGGCAGAGGACGTAGGAGCAT | 0  | 30 | RDR2-sensitive |
| TCTCGGCAGAGGGCGTAGGAGCAG | 0  | 39 | RDR2-sensitive |
| TCTCGGCAGAGGGCGTAGGAGCAT | 9  | 88 | RDR2-sensitive |
| TCTCGGCAGCGGGCGTAGGAGCAT | 0  | 32 | RDR2-sensitive |
| TCTCGGCGAACAGTATATCGGCAA | 0  | 10 | RDR2-sensitive |
| TCTCGGCGAACTGTACATCGGCAA | 1  | 16 | RDR2-sensitive |
| TCTCGGCGAACTGTATATCGGCAA | 0  | 12 | RDR2-sensitive |
| TCTCGGGAGCGAATTTTCAGGCAT | 0  | 9  | RDR2-sensitive |
| TCTCGGGCACTCGACAAAGAGGTT | 2  | 19 | RDR2-sensitive |
| TCTCGGGCACTCGGCAAAGAGGTT | 8  | 83 | RDR2-sensitive |
| TCTCGGGCACTCGGCAAAGATGTT | 0  | 9  | RDR2-sensitive |
| TCTCGGGCTCTCGGCGTATACCGC | 0  | 9  | RDR2-sensitive |
| TCTCGGGTGGAGCATATACGTCGT | 2  | 37 | RDR2-sensitive |
| TCTCGGTAACTGTACATCGGCAA  | 0  | 18 | RDR2-sensitive |
| TCTCGGTAACCTTGAGCATCTTGG | 26 | 3  | RDR2-resistant |
| TCTCGGTACAGGACAGATCGGCAC | 0  | 13 | RDR2-sensitive |
| TCTCGGTCTGAGCTTCCCAGAGAC | 17 | 0  | RDR2-resistant |
| TCTCGGTGGAACGCGACGCTCGAT | 0  | 18 | RDR2-sensitive |
| TCTCGGTTGTATTTCTTTTCGGTG | 35 | 2  | RDR2-resistant |



|                           |     |     |                |
|---------------------------|-----|-----|----------------|
| TCTCGGTTTGGCTCAGAGCGGCTC  | 0   | 9   | RDR2-sensitive |
| TCTCGTAGCACGAACGGTGGGCGC  | 0   | 14  | RDR2-sensitive |
| TCTCGTATCGTGCGTTGTTGTGGC  | 230 | 7   | RDR2-resistant |
| TCTCGTCGCGCGGCTTCGCCACTT  | 0   | 11  | RDR2-sensitive |
| TCTCGTCGTCAAGCTGAAGGCCGT  | 0   | 40  | RDR2-sensitive |
| TCTCGTCGTCAAGCTGAAGGTCGT  | 1   | 16  | RDR2-sensitive |
| TCTCGTCGTTCGTTCCGTACGTCAT | 0   | 14  | RDR2-sensitive |
| TCTCGTCGTTCGTTCCGTGCGTCAT | 1   | 28  | RDR2-sensitive |
| TCTCGTGACTTGAGCGACGGAGGA  | 2   | 18  | RDR2-sensitive |
| TCTCGTGCGTCAAGGTTAGCGGT   | 53  | 1   | RDR2-resistant |
| TCTCGTTTGGACTTCCGGCCGGT   | 0   | 10  | RDR2-sensitive |
| TCTCTAATTCGTGGATTTATGCAT  | 15  | 0   | RDR2-resistant |
| TCTCTACAGGGACTCCGTACAAGC  | 44  | 7   | RDR2-resistant |
| TCTCTACCTGGTTGCATCGCGGCT  | 0   | 11  | RDR2-sensitive |
| TCTCTACGCCAAGCCGGACGGTCC  | 0   | 12  | RDR2-sensitive |
| TCTCTACGCTGAGCCGGACGGTCC  | 0   | 10  | RDR2-sensitive |
| TCTCTAGTCAGGCGGAACGGTCC   | 0   | 9   | RDR2-sensitive |
| TCTCTAGTCAGGCGCGGACGGTCC  | 0   | 18  | RDR2-sensitive |
| TCTCTATAGAAGCACGGACGGTCC  | 0   | 13  | RDR2-sensitive |
| TCTCTATGACAGCGCGGACGGTAC  | 0   | 33  | RDR2-sensitive |
| TCTCTATGGATTGCAGCTGCAGCA  | 0   | 38  | RDR2-sensitive |
| TCTCTACCTACGGGTCTTCGGCT   | 15  | 0   | RDR2-resistant |
| TCTCTCCCCCAGATCTAGCGTGT   | 0   | 9   | RDR2-sensitive |
| TCTCTCCCGTCAGCAGTAGAGGCG  | 0   | 14  | RDR2-sensitive |
| TCTCTCGCACGCATACTCTTACC   | 27  | 0   | RDR2-resistant |
| TCTCTCGGACTACGGCACACTCAT  | 0   | 128 | RDR2-sensitive |
| TCTCTCGGACTCGGTCAAGGCCAG  | 0   | 15  | RDR2-sensitive |
| TCTCTCGGATCACCGGATCGACGA  | 0   | 10  | RDR2-sensitive |
| TCTCTCGTTGTGCGGAGTTTGGTGT | 22  | 0   | RDR2-resistant |
| TCTCTCGTTTGGACTTCCGGCCGG  | 0   | 26  | RDR2-sensitive |
| TCTCTCTCCCCCAGATCTAGCGT   | 0   | 18  | RDR2-sensitive |
| TCTCTCTGCAGGATGACTCTCATC  | 64  | 6   | RDR2-resistant |
| TCTCTCTGCTGTAGTTTTGGCATA  | 71  | 22  | RDR2-resistant |
| TCTCTGACGAGTGTGTAGGACGGC  | 0   | 12  | RDR2-sensitive |
| TCTCTGACGGGCTGGTGTGTCAC   | 0   | 10  | RDR2-sensitive |
| TCTCTGACTGACGTGCCGGACGGT  | 1   | 13  | RDR2-sensitive |
| TCTCTGACTGTAGCGCGGACCGG   | 0   | 14  | RDR2-sensitive |
| TCTCTGATCAGGCACGGACGGTCC  | 0   | 39  | RDR2-sensitive |
| TCTCTGATCAGGCGCGGACGGTCC  | 0   | 13  | RDR2-sensitive |
| TCTCTGCACAGGCGCGGACGGTCC  | 0   | 26  | RDR2-sensitive |
| TCTCTGCACAGGGGCGGACGGTCC  | 4   | 17  | RDR2-sensitive |
| TCTCTGCCTGACGGCCGGACGGTC  | 1   | 14  | RDR2-sensitive |
| TCTCTGCGACGACGGGCTGGACGG  | 0   | 10  | RDR2-sensitive |
| TCTCTGCGACGGCACGGACGGTCT  | 0   | 14  | RDR2-sensitive |
| TCTCTGCGCTATTGTAGACGGTTC  | 0   | 12  | RDR2-sensitive |
| TCTCTGCGGAGCCGATGACGGTCC  | 0   | 18  | RDR2-sensitive |
| TCTCTGCGGAGGAGTAGACGGTCC  | 0   | 13  | RDR2-sensitive |
| TCTCTGCGGAGGCGTAGACGGTCC  | 0   | 15  | RDR2-sensitive |
| TCTCTGCGGGAGCGCTGACGGAGC  | 0   | 10  | RDR2-sensitive |

|                           |     |     |                |
|---------------------------|-----|-----|----------------|
| TCTCTGCGTAGAGTTGCGGACGGT  | 0   | 9   | RDR2-sensitive |
| TCTCTGCTGAGCGGGAGTTCTGGA  | 17  | 0   | RDR2-resistant |
| TCTCTGGAATTGTAGCGTTAGCAT  | 0   | 13  | RDR2-sensitive |
| TCTCTGGCGGACTGCGGAGGCGTC  | 0   | 13  | RDR2-sensitive |
| TCTCTGGGCCGTGCTTGGACACAT  | 1   | 16  | RDR2-sensitive |
| TCTCTGGTCAAACGCGGACGGTCC  | 0   | 14  | RDR2-sensitive |
| TCTCTGGTCAAGCGCGGACGGTCC  | 0   | 56  | RDR2-sensitive |
| TCTCTGGTCAGACGCAGACGGTAC  | 0   | 11  | RDR2-sensitive |
| TCTCTGGTCAGACGCGGACGGTCC  | 2   | 173 | RDR2-sensitive |
| TCTCTGGTCAGACGTGGACGGTCC  | 0   | 54  | RDR2-sensitive |
| TCTCTGGTCAGGCACGGACGGTCC  | 0   | 22  | RDR2-sensitive |
| TCTCTGGTCAGGCGGAACGGTCC   | 0   | 20  | RDR2-sensitive |
| TCTCTGGTCAGGCGCGGACGATCC  | 0   | 12  | RDR2-sensitive |
| TCTCTGGTCAGGCGCGGACGGTCC  | 9   | 689 | RDR2-sensitive |
| TCTCTGGTCAGGCGCGGACGGTCT  | 0   | 44  | RDR2-sensitive |
| TCTCTGGTCAGGCGTGGACGGTCC  | 2   | 31  | RDR2-sensitive |
| TCTCTGGTCAGGTGCGGACGGTCC  | 1   | 12  | RDR2-sensitive |
| TCTCTGGTCGGACGCGGACGGTCC  | 0   | 12  | RDR2-sensitive |
| TCTCTGTAGAAGCACGGACGGTCC  | 0   | 25  | RDR2-sensitive |
| TCTCTGTAGAGGCGTGGACGGTCC  | 0   | 21  | RDR2-sensitive |
| TCTCTGTAGAGTGGCAGATTCGAC  | 26  | 0   | RDR2-resistant |
| TCTCTGTAGCAAGGTGGTTCTCCC  | 35  | 0   | RDR2-resistant |
| TCTCTGTAGCAGCACGGACGGTCC  | 2   | 22  | RDR2-sensitive |
| TCTCTGTAGCCGCATCACGCGCAT  | 0   | 10  | RDR2-sensitive |
| TCTCTGTGGAACCACGGACGGTCC  | 0   | 9   | RDR2-sensitive |
| TCTCTGTGAGGCACGAACGGTCC   | 0   | 27  | RDR2-sensitive |
| TCTCTGTGAGGCACGGACGGTCC   | 0   | 9   | RDR2-sensitive |
| TCTCTGTGAGGCGCTGACGGTCC   | 0   | 18  | RDR2-sensitive |
| TCTCTGTGATAGATGGCAGGTTT   | 38  | 3   | RDR2-resistant |
| TCTCTGTTTGTAGACACGTACGGG  | 44  | 5   | RDR2-resistant |
| TCTCTGTTTGTCTACTGTGCGGGC  | 21  | 0   | RDR2-resistant |
| TCTCTTAAACTGGAATACATGGCT  | 22  | 0   | RDR2-resistant |
| TCTCTTACGGAAGCAGGACAACGT  | 0   | 19  | RDR2-sensitive |
| TCTCTTACGGAAGCAGGACGACGT  | 1   | 54  | RDR2-sensitive |
| TCTCTTACGGAAGCAGGAGGACGT  | 1   | 13  | RDR2-sensitive |
| TCTCTTGGACTCTATTGTGCGCAT  | 0   | 10  | RDR2-sensitive |
| TCTCTTGTAGCAGCTTAAGAAGCC  | 96  | 4   | RDR2-resistant |
| TCTCTTGTGCGTGTAGCAGCAGCAT | 0   | 17  | RDR2-sensitive |
| TCTCTTTAAGTCGGTATCGTCCTT  | 14  | 0   | RDR2-resistant |
| TCTGAAAAGCTGACTGTGGGGAAA  | 0   | 13  | RDR2-sensitive |
| TCTGAAAAGCTGGCTGTGGGGAAA  | 3   | 34  | RDR2-sensitive |
| TCTGAAAGATATCGGTCTAAATAA  | 127 | 0   | RDR2-resistant |
| TCTGAAAGTGACTGAATATATGCA  | 93  | 6   | RDR2-resistant |
| TCTGAACGAGCCCGAGTCGAGCCT  | 0   | 13  | RDR2-sensitive |
| TCTGAACGTCGAGCTGGTCCGAGC  | 0   | 23  | RDR2-sensitive |
| TCTGAAGATGGAGAATGTCGTCAT  | 0   | 15  | RDR2-sensitive |
| TCTGAAGCTGGAGAATGTCGTCAT  | 0   | 10  | RDR2-sensitive |
| TCTGAAGCTGTGAAGGTCCGATCT  | 14  | 0   | RDR2-resistant |
| TCTGAAGGCTGCAGACAGATCAT   | 0   | 11  | RDR2-sensitive |

|                           |     |    |                |
|---------------------------|-----|----|----------------|
| TCTGAATGATTTTAGCGACTTGGA  | 18  | 0  | RDR2-resistant |
| TCTGAATGGAAGGTGGAATGGTCA  | 27  | 0  | RDR2-resistant |
| TCTGAATTGTATGAGAGACGTTGT  | 0   | 16 | RDR2-sensitive |
| TCTGAATTTTGTGGACTTCGGCT   | 43  | 0  | RDR2-resistant |
| TCTGACATAGGTAAGTGTGGATCGG | 0   | 13 | RDR2-sensitive |
| TCTGACATCCACGGGCTAGCAGGC  | 0   | 11 | RDR2-sensitive |
| TCTGACATGTCCAGAGCTTGGCTC  | 0   | 16 | RDR2-sensitive |
| TCTGACCACTGGACGTTAGCACTT  | 0   | 11 | RDR2-sensitive |
| TCTGACCCAGGACTTTGTTGCGGC  | 0   | 11 | RDR2-sensitive |
| TCTGACCCCATGAATTCTCGGCCT  | 0   | 9  | RDR2-sensitive |
| TCTGACCTGAACCCGACACGGCAC  | 0   | 27 | RDR2-sensitive |
| TCTGACCTGGCTGCCTCGCTGCAT  | 0   | 9  | RDR2-sensitive |
| TCTGACGACCAGAAGTTGCTGCAG  | 0   | 33 | RDR2-sensitive |
| TCTGACGCGGATTGTGCGATGGTT  | 0   | 19 | RDR2-sensitive |
| TCTGACGTGGCAGTACCTCGGCGC  | 0   | 12 | RDR2-sensitive |
| TCTGACGTTCTGGATTGGCGCGCC  | 0   | 9  | RDR2-sensitive |
| TCTGACGTTGGGCCAGATACGGAT  | 0   | 18 | RDR2-sensitive |
| TCTGACTCGGACAGATTTTAGCAT  | 0   | 11 | RDR2-sensitive |
| TCTGACTCGGACAGATTTTAGCGT  | 1   | 35 | RDR2-sensitive |
| TCTGACTCGGGCGGATTCAGCGT   | 0   | 34 | RDR2-sensitive |
| TCTGACTCTGGCGCGCACTGTAGC  | 2   | 22 | RDR2-sensitive |
| TCTGACTGATTGGCTGACTGACTG  | 15  | 0  | RDR2-resistant |
| TCTGACTGCGAAGATCGACAATGT  | 0   | 11 | RDR2-sensitive |
| TCTGACTGCTCGCGGTGGACCTGC  | 0   | 13 | RDR2-sensitive |
| TCTGACTTGAAGTGTGCTTGAAGA  | 103 | 6  | RDR2-resistant |
| TCTGACTTGGACAGATTTTAGCGT  | 1   | 56 | RDR2-sensitive |
| TCTGACTTTGCACATTCTGATGGT  | 12  | 32 | RDR2-sensitive |
| TCTGAGAAGCAGCTGAACTGATAA  | 1   | 36 | RDR2-sensitive |
| TCTGAGAATGCACTGGGCCAACCT  | 0   | 10 | RDR2-sensitive |
| TCTGAGACCTTGGCGTAGACTGTC  | 0   | 10 | RDR2-sensitive |
| TCTGAGACTGACAGGGCCCGGTTT  | 0   | 10 | RDR2-sensitive |
| TCTGAGCCCGGCACGGTAGAATAA  | 0   | 10 | RDR2-sensitive |
| TCTGAGCCTGGCACGGTAGAATAA  | 0   | 55 | RDR2-sensitive |
| TCTGAGCGAGTAGTCTGACTCTGTG | 0   | 22 | RDR2-sensitive |
| TCTGAGCGTGCAGGCTGATCTCAT  | 1   | 54 | RDR2-sensitive |
| TCTGAGCGTGCAGGCTGATCTCGT  | 1   | 13 | RDR2-sensitive |
| TCTGAGCGTGCAGGCTGGTCTCGT  | 0   | 9  | RDR2-sensitive |
| TCTGAGCTGGAACTAGGTGCGGT   | 22  | 0  | RDR2-resistant |
| TCTGAGCTGGACGAGGCCGCACTG  | 0   | 9  | RDR2-sensitive |
| TCTGAGGCTCTGACCGAGGACCAG  | 0   | 9  | RDR2-sensitive |
| TCTGAGGCTGAGCATGCATGTCAT  | 19  | 0  | RDR2-resistant |
| TCTGAGGGGCTGCAACGTTTGGAG  | 0   | 9  | RDR2-sensitive |
| TCTGAGGGTCACGCACTGCTGCAT  | 0   | 10 | RDR2-sensitive |
| TCTGAGGTGATTGAGGACATCATA  | 42  | 7  | RDR2-resistant |
| TCTGAGTCAGATTTAGCCGGCGCT  | 14  | 0  | RDR2-resistant |
| TCTGAGTCTACAGAACTTATGCAT  | 0   | 11 | RDR2-sensitive |
| TCTGATAACTTCTGAGGTCTTGGC  | 74  | 0  | RDR2-resistant |
| TCTGATACCAATTGTTGGAACCGG  | 1   | 18 | RDR2-sensitive |
| TCTGATAGGATCTGCCGAAGGTGT  | 0   | 13 | RDR2-sensitive |

|                           |    |    |                |
|---------------------------|----|----|----------------|
| TCTGATCAAGTCTCGGACCGGTCT  | 0  | 10 | RDR2-sensitive |
| TCTGATCAGTGC GGCCACGGACAT | 0  | 12 | RDR2-sensitive |
| TCTGATCCCACAGCATGGACTGGA  | 70 | 10 | RDR2-resistant |
| TCTGATCCTGGCACGTACATGGTT  | 1  | 17 | RDR2-sensitive |
| TCTGATCGGAGGGGCGCGGATCAT  | 0  | 12 | RDR2-sensitive |
| TCTGATCTCGCGAGCAGTGCTGAT  | 0  | 13 | RDR2-sensitive |
| TCTGATCTCGTAGACCGTGGTAAT  | 0  | 9  | RDR2-sensitive |
| TCTGATCTGACGGAGTCTGTGGCT  | 17 | 0  | RDR2-resistant |
| TCTGATCTTGTATGTGGATGGCAT  | 25 | 0  | RDR2-resistant |
| TCTGATGAAGCTGCTGCATTAACT  | 29 | 0  | RDR2-resistant |
| TCTGATGAAGTCGAAGCTGTTCGT  | 0  | 42 | RDR2-sensitive |
| TCTGATGAGTTAGACATGAGTGCT  | 0  | 9  | RDR2-sensitive |
| TCTGATGCCGGATCCTGAAGACGC  | 0  | 24 | RDR2-sensitive |
| TCTGATTGGATGACTGCGTGTCCG  | 0  | 12 | RDR2-sensitive |
| TCTGATTGGTACAATGAATATGGT  | 4  | 83 | RDR2-sensitive |
| TCTGCAACGGACCAGCTGAAGGGT  | 1  | 14 | RDR2-sensitive |
| TCTGCAATCAGGCTCGGCTCGGCT  | 0  | 13 | RDR2-sensitive |
| TCTGCACAACAAGCAGCTGGACAC  | 14 | 0  | RDR2-resistant |
| TCTGCACACTTCTGGACGGTCCGT  | 0  | 16 | RDR2-sensitive |
| TCTGCACAGCTGGCGAACCAACA   | 1  | 39 | RDR2-sensitive |
| TCTGCACCGTAGACTGCACTGTTC  | 0  | 14 | RDR2-sensitive |
| TCTGCACCTGACGTCGCCGGCGAT  | 0  | 12 | RDR2-sensitive |
| TCTGCACGCGCGGACCGTTCGGAC  | 1  | 16 | RDR2-sensitive |
| TCTGCACGCTTTCGGACGGTCCGC  | 0  | 12 | RDR2-sensitive |
| TCTGCACGGACGGGAAAACGAAGA  | 0  | 16 | RDR2-sensitive |
| TCTGCACTATTCAGCTGTAGGCAC  | 0  | 41 | RDR2-sensitive |
| TCTGCACTGTAGACTGCATGGTTC  | 0  | 20 | RDR2-sensitive |
| TCTGCACTGTAGACTGCATTGTTC  | 0  | 13 | RDR2-sensitive |
| TCTGCAGGACGATGGTAGAGACGA  | 1  | 12 | RDR2-sensitive |
| TCTGCAGGTAGAGCTGTACGGGCA  | 0  | 23 | RDR2-sensitive |
| TCTGCATCACTCTAGACGGTCCGC  | 0  | 9  | RDR2-sensitive |
| TCTGCATCCACCGGTACGCTCGAA  | 0  | 11 | RDR2-sensitive |
| TCTGCATCTTTAGACGACTTCTGC  | 0  | 16 | RDR2-sensitive |
| TCTGCATGTAGAGCTGTACGGGCA  | 0  | 12 | RDR2-sensitive |
| TCTGCCAACGCTTGGGACTGGATC  | 0  | 10 | RDR2-sensitive |
| TCTGCCACGTCAGCTAGCTCGGTG  | 0  | 23 | RDR2-sensitive |
| TCTGCCAGCCATAGGACGTAGGAT  | 0  | 11 | RDR2-sensitive |
| TCTGCCCAACAAGTCGGACGGTCT  | 0  | 9  | RDR2-sensitive |
| TCTGCCCAAGTTTGACTGGTCCAC  | 0  | 13 | RDR2-sensitive |
| TCTGCCTCTCGGACTCTCCGGCAT  | 0  | 20 | RDR2-sensitive |
| TCTGCCTCTGACGCGTTCTGCCAA  | 1  | 33 | RDR2-sensitive |
| TCTGCCTGT CAGGCGTTGGACGTC | 63 | 3  | RDR2-resistant |
| TCTGCCTGTTGACGCAACTGCA    | 2  | 15 | RDR2-sensitive |
| TCTGCCAAGT GAGCAGGACCTCGA | 0  | 11 | RDR2-sensitive |
| TCTGCCAAGGCGCGGACGATCTGC  | 0  | 9  | RDR2-sensitive |
| TCTGCGACAGCGCGGACAGTCTGC  | 0  | 10 | RDR2-sensitive |
| TCTGCGACGGCACGGACGGTCTGT  | 0  | 13 | RDR2-sensitive |
| TCTGCGACGGTGTGGACGGTCCGC  | 0  | 10 | RDR2-sensitive |
| TCTGCGAGCTTTCGGATGGTCTGT  | 0  | 11 | RDR2-sensitive |

|                           |    |     |                |
|---------------------------|----|-----|----------------|
| TCTGCGCACACGTAGACGGTCTGT  | 0  | 26  | RDR2-sensitive |
| TCTGCGCATCTGTGGAGCCAGGCT  | 3  | 272 | RDR2-sensitive |
| TCTGCGCCAAGTCGGAAAGTCCAG  | 0  | 20  | RDR2-sensitive |
| TCTGCGCCTGTAGGCCGACGGTC   | 0  | 9   | RDR2-sensitive |
| TCTGCGCGTACAAGATGAGCTCAT  | 0  | 33  | RDR2-sensitive |
| TCTGCGCGTACAAGCTGAGCTCAT  | 3  | 262 | RDR2-sensitive |
| TCTGCGCGTACAAGCTGAGCTCGT  | 0  | 11  | RDR2-sensitive |
| TCTGCGCGTGCAAAAGTGGCTCTT  | 0  | 11  | RDR2-sensitive |
| TCTGCGCGTGCAGGCTGAGAGACA  | 0  | 9   | RDR2-sensitive |
| TCTGCGCGTGCATGTAGAAGTGGT  | 0  | 42  | RDR2-sensitive |
| TCTGCGCTATTGTAGACGGTTCGA  | 0  | 12  | RDR2-sensitive |
| TCTGCGGAAGTGGCCTGAGGACAG  | 0  | 9   | RDR2-sensitive |
| TCTGCGGCAGTACGAACGGTCCAC  | 0  | 31  | RDR2-sensitive |
| TCTGCGGCCGGCACAGAGAATCCGT | 0  | 11  | RDR2-sensitive |
| TCTGCGGGCAGGTTCACTCAGGTA  | 24 | 1   | RDR2-resistant |
| TCTGCGGGTGATGAGACTTCTAGG  | 22 | 0   | RDR2-resistant |
| TCTGCGGTAGGAGCTGGAGCTGGT  | 24 | 0   | RDR2-resistant |
| TCTGCGGTCCGGTATTTCCGAGGC  | 1  | 14  | RDR2-sensitive |
| TCTGCGGTGGACTGGGACGAGCAC  | 0  | 22  | RDR2-sensitive |
| TCTGCGTAATCCGTCTGGTGGCAC  | 0  | 48  | RDR2-sensitive |
| TCTGCGTACGCGTGGACGGTCTGC  | 0  | 10  | RDR2-sensitive |
| TCTGCGTACGTCCGGACGGTCCGA  | 0  | 13  | RDR2-sensitive |
| TCTGCGTACGTCCGGACGGTCCGC  | 0  | 9   | RDR2-sensitive |
| TCTGCGTACGTCCGGACGGTCTGT  | 0  | 16  | RDR2-sensitive |
| TCTGCGTAGGCGCGAACGGTTCGC  | 0  | 15  | RDR2-sensitive |
| TCTGCGTATGTCTGGACGGTCCGT  | 1  | 17  | RDR2-sensitive |
| TCTGCGTGCATTGACTTTGATTAA  | 0  | 10  | RDR2-sensitive |
| TCTGCTATCATGACGACTCGACAA  | 0  | 9   | RDR2-sensitive |
| TCTGCTATTGTAGGGCTTGTTCCG  | 0  | 9   | RDR2-sensitive |
| TCTGCTCAGACTGTCCGGTTGCAC  | 0  | 18  | RDR2-sensitive |
| TCTGCTCGAGAGAAAGGTGGAGCT  | 0  | 9   | RDR2-sensitive |
| TCTGCTCGATGGCGCACCCGGACAG | 0  | 16  | RDR2-sensitive |
| TCTGCTCGGCTCGATGGTACAGCG  | 0  | 9   | RDR2-sensitive |
| TCTGCTCGGCTGGACGACTGCATC  | 0  | 19  | RDR2-sensitive |
| TCTGCTCGGGCGGATTCCAGCGTA  | 0  | 13  | RDR2-sensitive |
| TCTGCTCGTCCATGCTGTCCGCC   | 0  | 27  | RDR2-sensitive |
| TCTGCTCTGGACAGAGAAGGCTGC  | 0  | 9   | RDR2-sensitive |
| TCTGCTGCAGTTCTGTCCGCGCAT  | 21 | 0   | RDR2-resistant |
| TCTGCTGCCTGATCCTGAAGACGT  | 0  | 16  | RDR2-sensitive |
| TCTGCTGGAAACGGGGACGGATAC  | 0  | 10  | RDR2-sensitive |
| TCTGCTTCTGTGACGACAACACC   | 35 | 4   | RDR2-resistant |
| TCTGCTTGTTGGACTGCGGCTGT   | 0  | 22  | RDR2-sensitive |
| TCTGCTTTCGGACCGATGGCCCAT  | 0  | 13  | RDR2-sensitive |
| TCTGCTTCTGTATGCTGGCTCCT   | 20 | 0   | RDR2-resistant |
| TCTGCTTGTATCTGGATCGTCCGT  | 0  | 27  | RDR2-sensitive |
| TCTGCTTTTGCTAGTAGACGCTGA  | 0  | 9   | RDR2-sensitive |
| TCTGGAACAGGCTCGACGAGAGGA  | 1  | 15  | RDR2-sensitive |
| TCTGGAACGGAGCGGCTCTGTTTT  | 1  | 23  | RDR2-sensitive |
| TCTGGAACGGGCTCGACGAGATGA  | 1  | 30  | RDR2-sensitive |

|                           |     |     |                |
|---------------------------|-----|-----|----------------|
| TCTGGAATTGCTTGAGCCTCGGTT  | 120 | 21  | RDR2-resistant |
| TCTGGACAAATAAGCTAGACTGTT  | 0   | 13  | RDR2-sensitive |
| TCTGGACACCGCATCCGACGACGA  | 0   | 9   | RDR2-sensitive |
| TCTGGACACCGCATCTGACGACGA  | 0   | 9   | RDR2-sensitive |
| TCTGGACAGTGGATAGAGGTAGGC  | 1   | 15  | RDR2-sensitive |
| TCTGGACATGGCAGACTACACCAG  | 0   | 11  | RDR2-sensitive |
| TCTGGACATGGCAGACTGCACCAG  | 0   | 101 | RDR2-sensitive |
| TCTGGACATGTCAGACTGCAACAG  | 0   | 17  | RDR2-sensitive |
| TCTGGACATGTCAGACTGCACCAA  | 0   | 15  | RDR2-sensitive |
| TCTGGACATGTCAGACTGCACCAG  | 0   | 92  | RDR2-sensitive |
| TCTGGACATGTCAGGAAGCTGCAG  | 0   | 22  | RDR2-sensitive |
| TCTGGACATGTCAGGTGGCAGTGA  | 1   | 13  | RDR2-sensitive |
| TCTGGACCAGACTCTACAGGCGCG  | 0   | 12  | RDR2-sensitive |
| TCTGGACCCGCATAGAACCGGACC  | 0   | 13  | RDR2-sensitive |
| TCTGGACCGACGAAAATGTGGCGT  | 0   | 11  | RDR2-sensitive |
| TCTGGACCGGATCCGACGCCGCAT  | 0   | 12  | RDR2-sensitive |
| TCTGGACCGGCCTAGAGCGAGCGT  | 0   | 13  | RDR2-sensitive |
| TCTGGACGCACTCGTAGGACGCCA  | 0   | 19  | RDR2-sensitive |
| TCTGGACGCAAGGAGCGACGCCTTC | 0   | 9   | RDR2-sensitive |
| TCTGGACGCGGCTGCTAGACGCAC  | 0   | 19  | RDR2-sensitive |
| TCTGGACGGACAAATCAGCGACAT  | 1   | 17  | RDR2-sensitive |
| TCTGGACGGGGCTGGTGGACAGGT  | 0   | 16  | RDR2-sensitive |
| TCTGGACTCATGGGCACCCGGCTC  | 0   | 12  | RDR2-sensitive |
| TCTGGACTCGACGCTCGGCGCCAT  | 0   | 9   | RDR2-sensitive |
| TCTGGACTGGTTCGGCGAAGGGCT  | 0   | 21  | RDR2-sensitive |
| TCTGGAGACAGCGGCAGAGCTCAT  | 0   | 10  | RDR2-sensitive |
| TCTGGAGACGTAGGCGACAGCCAA  | 0   | 9   | RDR2-sensitive |
| TCTGGAGATTGCGGTTCTTGATGC  | 41  | 2   | RDR2-resistant |
| TCTGGAGCGCGCTGGCATGACTGC  | 0   | 10  | RDR2-sensitive |
| TCTGGAGCTGTAGCAGGTGATCGA  | 0   | 10  | RDR2-sensitive |
| TCTGGATAAACCCGAGGCACTGAG  | 0   | 9   | RDR2-sensitive |
| TCTGGATAATGGGGGCATGAGCAG  | 30  | 3   | RDR2-resistant |
| TCTGGATAGTTTGATTGCACGCTT  | 2   | 71  | RDR2-sensitive |
| TCTGGATGCGGCAGAACCGTGCAC  | 0   | 38  | RDR2-sensitive |
| TCTGGATGTGGCAGAACCGTGCAC  | 0   | 38  | RDR2-sensitive |
| TCTGGATTAGCATGGATTGGAATT  | 0   | 13  | RDR2-sensitive |
| TCTGGATTCAGCTTTAGACCGGCC  | 38  | 2   | RDR2-resistant |
| TCTGGCAACCAGGTAGTAACTCGC  | 0   | 15  | RDR2-sensitive |
| TCTGGCACAATCCATATCTGGCAT  | 0   | 26  | RDR2-sensitive |
| TCTGGCACAGTTGTAGACAGACAA  | 0   | 25  | RDR2-sensitive |
| TCTGGCACGACACAGATCTGGCAT  | 0   | 242 | RDR2-sensitive |
| TCTGGCACGACATATATCTGGTAC  | 0   | 9   | RDR2-sensitive |
| TCTGGCACGGCCCATATCTGACAC  | 0   | 39  | RDR2-sensitive |
| TCTGGCACGGCCCATATCTGGCAC  | 1   | 27  | RDR2-sensitive |
| TCTGGCACGGCCCATATCTGGCAT  | 0   | 10  | RDR2-sensitive |
| TCTGGCACGGTCCATATCTGGCAC  | 0   | 9   | RDR2-sensitive |
| TCTGGCACTGAAGCAGGGACCCAT  | 0   | 11  | RDR2-sensitive |
| TCTGGCCACAAAAGCTGCTGCGG   | 0   | 9   | RDR2-sensitive |
| TCTGGCCAGGCACGCAGAACTGTG  | 0   | 11  | RDR2-sensitive |

|                           |     |    |                |
|---------------------------|-----|----|----------------|
| TCTGGCCAGGCACGCAGGACTGTG  | 0   | 9  | RDR2-sensitive |
| TCTGGCCAGGCACGTAGGACTGTG  | 0   | 20 | RDR2-sensitive |
| TCTGGCCCCAAAAGAACTGCTCGC  | 0   | 13 | RDR2-sensitive |
| TCTGGCCGCCAGAAGCTGAAGCTC  | 0   | 16 | RDR2-sensitive |
| TCTGGCCGCCAGAAGCTGAAGCTG  | 0   | 13 | RDR2-sensitive |
| TCTGGCCGTTGGGCTCGACGCCAA  | 0   | 13 | RDR2-sensitive |
| TCTGGCGACGGACGGCGTAAGTAC  | 0   | 17 | RDR2-sensitive |
| TCTGGCGATCGGCCGAGCTTAGCAA | 0   | 13 | RDR2-sensitive |
| TCTGGCGGCAGAACGGCAGAACAC  | 0   | 13 | RDR2-sensitive |
| TCTGGCGTCAAGACAAGTATGGTT  | 26  | 2  | RDR2-resistant |
| TCTGGCTCGAGCGGATTGCAGCGT  | 1   | 50 | RDR2-sensitive |
| TCTGGCTCGAGCGGATTTAAGTGT  | 1   | 17 | RDR2-sensitive |
| TCTGGCTCGGGCGGATCTAAGCGT  | 0   | 13 | RDR2-sensitive |
| TCTGGCTCGGGCGGATCCAGCGT   | 5   | 51 | RDR2-sensitive |
| TCTGGCTCGTCTGGCATCCGGCAC  | 0   | 12 | RDR2-sensitive |
| TCTGGCTCTAGTGTAGACGATGGT  | 0   | 10 | RDR2-sensitive |
| TCTGGCTCTGACCGGTCTGCTGCA  | 226 | 0  | RDR2-resistant |
| TCTGGCTCTGATACCACTGAAGGA  | 44  | 6  | RDR2-resistant |
| TCTGGCTCTTTGATGGCTCTCTGT  | 0   | 12 | RDR2-sensitive |
| TCTGGCTGAGCTCGATCCGGGTAT  | 0   | 17 | RDR2-sensitive |
| TCTGGCTGATATGACACGGTTCAA  | 0   | 9  | RDR2-sensitive |
| TCTGGCTGATCAGGACGACGTCAA  | 0   | 9  | RDR2-sensitive |
| TCTGGCTGGCTGTAACGGTAGCTC  | 3   | 43 | RDR2-sensitive |
| TCTGGCTGTAGGGAGAATCCGGCT  | 0   | 32 | RDR2-sensitive |
| TCTGGCTGTGCTCGCGGGATGCAA  | 0   | 10 | RDR2-sensitive |
| TCTGGCTTCTCCAAAAACGGCTTT  | 0   | 9  | RDR2-sensitive |
| TCTGGGAATGTAGCAGGTAACCGA  | 0   | 9  | RDR2-sensitive |
| TCTGGGACGTAGTGAGCACCGGAG  | 0   | 9  | RDR2-sensitive |
| TCTGGGACTGAACTGGTATTTCTT  | 0   | 10 | RDR2-sensitive |
| TCTGGGAGTGAACCGGTGCTGCAT  | 0   | 20 | RDR2-sensitive |
| TCTGGGCACAACCTGGACACAGCAC | 0   | 10 | RDR2-sensitive |
| TCTGGGCCAGCTTCTGACGGTCGC  | 0   | 11 | RDR2-sensitive |
| TCTGGGCCGACGGTTTCTGCAGAC  | 0   | 14 | RDR2-sensitive |
| TCTGGGCCGGACAGTGCATGACCT  | 0   | 16 | RDR2-sensitive |
| TCTGGGCCGGACGATCCGCGACAT  | 0   | 13 | RDR2-sensitive |
| TCTGGGCCGGACGGTTCGGGACCT  | 0   | 27 | RDR2-sensitive |
| TCTGGGCTAGACGGTCTGTAACCT  | 0   | 35 | RDR2-sensitive |
| TCTGGGCTCGGCTGCTCGTGGCAT  | 1   | 32 | RDR2-sensitive |
| TCTGGGCTGGGACACGCGGCGACA  | 1   | 22 | RDR2-sensitive |
| TCTGGGCTGGGGCACGCAGCACAC  | 0   | 12 | RDR2-sensitive |
| TCTGGGCTGTGCGTGTGCGGCTGT  | 0   | 18 | RDR2-sensitive |
| TCTGGGGACTCTATCGGGCGGCAT  | 14  | 0  | RDR2-resistant |
| TCTGGGGCTGAGTTGCAGAGACAG  | 0   | 11 | RDR2-sensitive |
| TCTGGGGCTGTAGCAAGTACCGGG  | 0   | 14 | RDR2-sensitive |
| TCTGGGGGCAGCGGCAGAGCTCAT  | 0   | 10 | RDR2-sensitive |
| TCTGGGTTGGGTTCTGGACGGTGT  | 0   | 16 | RDR2-sensitive |
| TCTGGTACCTCGGCGCTGAGACGT  | 0   | 16 | RDR2-sensitive |
| TCTGGTAGACGCTGCGAAGTTCAT  | 0   | 30 | RDR2-sensitive |
| TCTGGTATCAAAGGTCTCGACGAT  | 0   | 9  | RDR2-sensitive |

|                           |     |    |                |
|---------------------------|-----|----|----------------|
| TCTGGTCACGGTCTGCATGAGAAG  | 0   | 10 | RDR2-sensitive |
| TCTGGTCACTGTTACGGCACTTG   | 102 | 2  | RDR2-resistant |
| TCTGGTCAGACGCAGACGGTACAC  | 0   | 21 | RDR2-sensitive |
| TCTGGTCAGACGCGGACGGTCCAC  | 0   | 22 | RDR2-sensitive |
| TCTGGTCAGACGCGGACGGTCCGC  | 0   | 12 | RDR2-sensitive |
| TCTGGTCAGACGCGGACGGTCCGT  | 0   | 33 | RDR2-sensitive |
| TCTGGTCAGACGTGGACGGTCCGC  | 0   | 13 | RDR2-sensitive |
| TCTGGTCAGGCGCGGACGGTCCAC  | 0   | 23 | RDR2-sensitive |
| TCTGGTCAGGCGCGGACGGTCCGC  | 6   | 71 | RDR2-sensitive |
| TCTGGTCAGGCGCGGACGGTCCGT  | 0   | 25 | RDR2-sensitive |
| TCTGGTCAGGCGTGGACGGTCCGC  | 1   | 27 | RDR2-sensitive |
| TCTGGTCCGAGCTCGAGCAGGTGA  | 0   | 12 | RDR2-sensitive |
| TCTGGTGGACCTGCAGGTGGGGCC  | 0   | 9  | RDR2-sensitive |
| TCTGGTTCGGGCAGATCAGAGCGT  | 0   | 19 | RDR2-sensitive |
| TCTGTAAGGCGTGAGAGACTCCAA  | 0   | 17 | RDR2-sensitive |
| TCTGTAATGACGGTCTGTAACCCT  | 4   | 26 | RDR2-sensitive |
| TCTGTACACGGGCGATGACCTCAC  | 0   | 22 | RDR2-sensitive |
| TCTGTACAGAACGGAGCTCGGCGC  | 0   | 11 | RDR2-sensitive |
| TCTGTACAGAATGGAGCTCGGCGC  | 0   | 15 | RDR2-sensitive |
| TCTGTACAGTCGTCGGGAGGCCGT  | 0   | 31 | RDR2-sensitive |
| TCTGTACAGTCGTCGGGAGGCTGT  | 0   | 9  | RDR2-sensitive |
| TCTGTACAGTTGTCTGGGAGGTTGT | 0   | 9  | RDR2-sensitive |
| TCTGTACCGTAGACCGCACTGTTT  | 0   | 18 | RDR2-sensitive |
| TCTGTACGACACAGGGGCTGCTGA  | 0   | 9  | RDR2-sensitive |
| TCTGTACTCTGCCAGCATGTCTGA  | 0   | 13 | RDR2-sensitive |
| TCTGTAGATAGTTTGAANAATGGTC | 31  | 5  | RDR2-resistant |
| TCTGTAGCAGCTTTTGGTGGCCAG  | 0   | 12 | RDR2-sensitive |
| TCTGTAGCGAACTGAGAATAAGGC  | 0   | 9  | RDR2-sensitive |
| TCTGTAGCGGGATAGGACACGCAT  | 0   | 12 | RDR2-sensitive |
| TCTGTAGCGGTTCTGGACGGTTCGC | 0   | 9  | RDR2-sensitive |
| TCTGTAGGAAACGGATGACGCCTA  | 0   | 9  | RDR2-sensitive |
| TCTGTAGGATCTAGGACACCGGCT  | 0   | 37 | RDR2-sensitive |
| TCTGTAGTGGAAACAGGCTCATGAG | 0   | 9  | RDR2-sensitive |
| TCTGTATCCATAGACCATACTCGT  | 0   | 12 | RDR2-sensitive |
| TCTGTATCTATCGGCTTATTTACA  | 20  | 2  | RDR2-resistant |
| TCTGTATCTTAGAACGCGCACAAAT | 0   | 10 | RDR2-sensitive |
| TCTGTATGTAATCATCGACCGCAT  | 0   | 13 | RDR2-sensitive |
| TCTGTATTGGTCTTCGACATGGCT  | 19  | 0  | RDR2-resistant |
| TCTGTATTTGGTAATCTGGAACGG  | 0   | 42 | RDR2-sensitive |
| TCTGTCAACTGGAGGACGCGCGTC  | 0   | 10 | RDR2-sensitive |
| TCTGTCAAGTGGCACTGCAGTCGG  | 4   | 20 | RDR2-sensitive |
| TCTGTCAGCAGTCGAACTAAACAT  | 0   | 12 | RDR2-sensitive |
| TCTGTCAGGTGGGCCTCGGGCGGT  | 0   | 9  | RDR2-sensitive |
| TCTGTCATCGGACGACGCACAGAA  | 0   | 14 | RDR2-sensitive |
| TCTGTCATGTTAGGCTTCGGTGGT  | 0   | 12 | RDR2-sensitive |
| TCTGTCATGTTGCACTTGGACGGT  | 177 | 19 | RDR2-resistant |
| TCTGTCCAAGACGTCGAAGAGCAC  | 0   | 9  | RDR2-sensitive |
| TCTGTCCAGCTGCAGAAGGTCCAA  | 35  | 0  | RDR2-resistant |
| TCTGTCCGAGAGTGGAAACGTTTAT | 0   | 11 | RDR2-sensitive |



|                           |    |     |                |
|---------------------------|----|-----|----------------|
| TCTGTCCGTGAGCCGAAGTCTGAG  | 0  | 11  | RDR2-sensitive |
| TCTGTCTTTACAGAACACTCTAA   | 0  | 28  | RDR2-sensitive |
| TCTGTGACGAGCACACCCGGACAT  | 0  | 9   | RDR2-sensitive |
| TCTGTGACTGAAGGGCGCGCGTC   | 2  | 72  | RDR2-sensitive |
| TCTGTGACTGGAGGACGTGCGTC   | 5  | 25  | RDR2-sensitive |
| TCTGTGACTGGAGGGCGTGCGTC   | 0  | 17  | RDR2-sensitive |
| TCTGTGAGATGCGCAAGGACGAC   | 0  | 18  | RDR2-sensitive |
| TCTGTGAGATGCGCGAGGACGAC   | 0  | 11  | RDR2-sensitive |
| TCTGTGAGTGGCACAGCAGTCGG   | 0  | 9   | RDR2-sensitive |
| TCTGTGCGTAGGACAATTCGGCT   | 2  | 45  | RDR2-sensitive |
| TCTGTGCGTAGGACAGTTCGGCA   | 0  | 9   | RDR2-sensitive |
| TCTGTGCGTAGGACAGTTCGGCT   | 2  | 102 | RDR2-sensitive |
| TCTGTGCGGAGCGTGCGGGAGGGA  | 0  | 10  | RDR2-sensitive |
| TCTGTGCTACACTGGGTTGCGCAA  | 0  | 13  | RDR2-sensitive |
| TCTGTGCTGCTTATGGGAAGGGAG  | 4  | 55  | RDR2-sensitive |
| TCTGTGCTTGCTAGCGAAGGACGC  | 0  | 12  | RDR2-sensitive |
| TCTGTCTCGCAGACTTGCTCGGCT  | 0  | 12  | RDR2-sensitive |
| TCTGTCTCGCGGCGTTCGGGACTC  | 0  | 9   | RDR2-sensitive |
| TCTGTCTCTGTCTGACCAGCGGTT  | 4  | 25  | RDR2-sensitive |
| TCTGTCTGACATCTGACGACGCAT  | 10 | 31  | RDR2-sensitive |
| TCTGTCTGACATCTGACGTTCGCAT | 0  | 10  | RDR2-sensitive |
| TCTGTCTTATCTCGGTCCCTCGGAC | 1  | 23  | RDR2-sensitive |
| TCTGTCTTGTAGAAGGGGTATGAA  | 2  | 29  | RDR2-sensitive |
| TCTGTGACGCGGGACGTCGAGCAA  | 0  | 24  | RDR2-sensitive |
| TCTGTGACGGCAGGGACTTGCGTT  | 59 | 0   | RDR2-resistant |
| TCTGTGATCGTGCAGCAAGAGCGC  | 0  | 12  | RDR2-sensitive |
| TCTGTGCACCATCGCAGGACTGAC  | 15 | 0   | RDR2-resistant |
| TCTGTGCACTCGCGGACGGTTCGTA | 0  | 12  | RDR2-sensitive |
| TCTGTGCATGAGTGGACGGTCTGT  | 0  | 10  | RDR2-sensitive |
| TCTGTGCGTGCAGGTAGAGAGCCA  | 0  | 9   | RDR2-sensitive |
| TCTGTGCGTTGCGACGGTATCTGT  | 0  | 11  | RDR2-sensitive |
| TCTGTGCTCGTAGAAGGTGGGACG  | 0  | 9   | RDR2-sensitive |
| TCTGTGCTGAGTGCTGACTGTCAT  | 0  | 26  | RDR2-sensitive |
| TCTGTGCTTACAGACCGTCCGGAC  | 0  | 17  | RDR2-sensitive |
| TCTGTGCTTGACTCCGGCTGGTGA  | 17 | 0   | RDR2-resistant |
| TCTGTGCTTTGGACATATGCTGAA  | 14 | 0   | RDR2-resistant |
| TCTGTGGAGCCAGGCTGAGAGGCT  | 1  | 28  | RDR2-sensitive |
| TCTGTGGAGGCACGAACGGTCCGT  | 0  | 15  | RDR2-sensitive |
| TCTGTGGCTCGGACGGTCCATGAT  | 1  | 13  | RDR2-sensitive |
| TCTGTGGTCTAGACTGTATGGCGT  | 0  | 22  | RDR2-sensitive |
| TCTGTGTATGTCCGGACGGTCCGC  | 0  | 21  | RDR2-sensitive |
| TCTGTGTGCAATTGAACGGTCCGC  | 0  | 14  | RDR2-sensitive |
| TCTGTGTGCTGCTTTAGTGGGCAT  | 0  | 26  | RDR2-sensitive |
| TCTGTGTTAGGATTGAAAACGGAC  | 0  | 18  | RDR2-sensitive |
| TCTGTGTTTGATAAGCTGGAACGG  | 1  | 12  | RDR2-sensitive |
| TCTGTGTTTGATAATCTGGAACGG  | 0  | 11  | RDR2-sensitive |
| TCTGTGTTTGCAAGCAGAACTGA   | 0  | 26  | RDR2-sensitive |
| TCTGTGTTTGTAAGCTGGAACGG   | 2  | 15  | RDR2-sensitive |
| TCTGTGTTTGTAAGTTGGAACGG   | 1  | 21  | RDR2-sensitive |

|                             |     |     |                |
|-----------------------------|-----|-----|----------------|
| TCTGTGTTTGGTAATCTAGAACGG    | 2   | 21  | RDR2-sensitive |
| TCTGTGTTTGGTAATCTGGAACGG    | 31  | 295 | RDR2-sensitive |
| TCTGTTAGATGTTGGATAGACGTT    | 0   | 50  | RDR2-sensitive |
| TCTGTTAGATGTTGGATGGACGTT    | 0   | 9   | RDR2-sensitive |
| TCTGTTCAATCAGTCAATCGTTGT    | 0   | 17  | RDR2-sensitive |
| TCTGTTCCATGTAGCGGCGCTCTG    | 0   | 47  | RDR2-sensitive |
| TCTGTTCCATGTATCGGCGCTCTG    | 0   | 31  | RDR2-sensitive |
| TCTGTTCCCTGCGTCGGTCTCAGC    | 0   | 10  | RDR2-sensitive |
| TCTGTTCCGATGGCGCACCGGACAG   | 0   | 11  | RDR2-sensitive |
| TCTGTTCCGGTGAAGCAGCGAGCTC   | 0   | 42  | RDR2-sensitive |
| TCTGTTCTAGTACTGAGACTGTTT    | 0   | 17  | RDR2-sensitive |
| TCTGTTCTATAGCACTGGATGCAT    | 0   | 97  | RDR2-sensitive |
| TCTGTTCTTAGAATCTGGAACGGA    | 0   | 11  | RDR2-sensitive |
| TCTGTTGACCGTAGCCTAAGGCAT    | 0   | 14  | RDR2-sensitive |
| TCTGTTGAGTATATGCATAGCGGT    | 19  | 0   | RDR2-resistant |
| TCTGTTGCAGCGTGAACGGTCCAC    | 0   | 9   | RDR2-sensitive |
| TCTGTTGCCGCACGTAGAGGACAG    | 0   | 16  | RDR2-sensitive |
| TCTGTTGGATGGAAGATGCATGGT    | 0   | 13  | RDR2-sensitive |
| TCTGTTGGATTGTTATTCAGGCTA    | 45  | 13  | RDR2-resistant |
| TCTGTTGGGCTGCTCCATACGGTA    | 0   | 146 | RDR2-sensitive |
| TCTGTTGGGCTGCTCTATACGGTA    | 0   | 27  | RDR2-sensitive |
| TCTGTTGGTACGGGCAGAACGAGC    | 0   | 14  | RDR2-sensitive |
| TCTGTTGTCAATCAGGTGGACTGC    | 0   | 17  | RDR2-sensitive |
| TCTGTTGTCAATCAGGTGGGCTGC    | 0   | 10  | RDR2-sensitive |
| TCTGTTGTTGGAGAGGTAGCGGAT    | 0   | 71  | RDR2-sensitive |
| TCTGTTTCGGGAGGCGATCTTCGG    | 0   | 11  | RDR2-sensitive |
| TCTGTTTCTCGGTGTAGTTAGGCC    | 43  | 1   | RDR2-resistant |
| TCTGTTTGACCGCATAGCCGCCTT    | 0   | 9   | RDR2-sensitive |
| TCTGTTTGACGTGTTACATAACTT    | 90  | 4   | RDR2-resistant |
| TCTGTTTGAGTAAAGGGCACTGCT    | 24  | 3   | RDR2-resistant |
| TCTGTTTGAGACTGGCTGATCGC     | 0   | 20  | RDR2-sensitive |
| TCTGTTTGGTTAAGCTGTGGCTAT    | 0   | 10  | RDR2-sensitive |
| TCTGTTTGGTTGGGCTATGGCTGT    | 1   | 20  | RDR2-sensitive |
| TCTGTTTGGTTGGGCTGTGGCTGT    | 1   | 21  | RDR2-sensitive |
| TCTGTTTGGTTGGTGGGTAGGTGT    | 0   | 11  | RDR2-sensitive |
| TCTGTTTGTAAACGGTTGTGTTGAA   | 27  | 2   | RDR2-resistant |
| TCTGTTTTTCTGCGGCTGATGAG     | 211 | 10  | RDR2-resistant |
| TCTGTTTTTTTTCTGATTTGGGCA    | 35  | 0   | RDR2-resistant |
| TCTTAAAGTTGGGTTTGTGTTTGGGA  | 54  | 2   | RDR2-resistant |
| TCTTAAACATGATAGGGTTCGCA     | 33  | 0   | RDR2-resistant |
| TCTTAAACATGAAGTGGTTCTCTCA   | 67  | 4   | RDR2-resistant |
| TCTTAACTACGGACTIONTAGACGGTA | 67  | 4   | RDR2-resistant |
| TCTTAACTCGTTAAGTTGGACGGT    | 0   | 13  | RDR2-sensitive |
| TCTTAAAGCGTTGCAGTAAATCAG    | 25  | 1   | RDR2-resistant |
| TCTTAAATAGTTGTAGAGATGACGA   | 0   | 18  | RDR2-sensitive |
| TCTTACGATGTGTATGCGCTCACT    | 22  | 0   | RDR2-resistant |
| TCTTACTGGGACGGTAGCGGACGA    | 0   | 12  | RDR2-sensitive |
| TCTTAGCTAGTAGTGATGAGGATC    | 40  | 0   | RDR2-resistant |
| TCTTAGGACGGCAGTAGAGATGGC    | 0   | 9   | RDR2-sensitive |

|                           |     |    |                |
|---------------------------|-----|----|----------------|
| TCTTAGGACTTAGGGCGGGTGCAC  | 1   | 16 | RDR2-sensitive |
| TCTTAGGGTGCTCTGGGTCGGTAG  | 0   | 12 | RDR2-sensitive |
| TCTTAGTACTAGAACAGAGCGGTT  | 0   | 13 | RDR2-sensitive |
| TCTTAGTCACGATGGATATCATT   | 22  | 0  | RDR2-resistant |
| TCTTAGTTGGTGGAGCGATTTGTC  | 40  | 0  | RDR2-resistant |
| TCTTATATCTATGGCATGACTAAA  | 20  | 1  | RDR2-resistant |
| TCTTATTGGACTTTGTGTGCGGTG  | 2   | 29 | RDR2-sensitive |
| TCTTATTGACATCTTGACGTGCT   | 40  | 1  | RDR2-resistant |
| TCTTCAACTTTGGGATTATTCGGA  | 15  | 0  | RDR2-resistant |
| TCTTCACATGTAGATTCTGTTAGTA | 90  | 30 | RDR2-resistant |
| TCTTCACGCTGTAGAAGAGGGTAC  | 0   | 12 | RDR2-sensitive |
| TCTTCACGGAGAGACGGCTCTAAG  | 6   | 60 | RDR2-sensitive |
| TCTTCAGTTAGCGTGTGCGGTAGTG | 17  | 0  | RDR2-resistant |
| TCTTCATACTGTAGAAGAGGGTAA  | 0   | 10 | RDR2-sensitive |
| TCTTCATACTGTAGAAGAGGGTAC  | 0   | 41 | RDR2-sensitive |
| TCTTCATACTGTAGTAAGAGGTAA  | 0   | 12 | RDR2-sensitive |
| TCTTCATACTGTAGTAAGGGGTAC  | 2   | 68 | RDR2-sensitive |
| TCTTCATCAAATGGAAATCGTCGC  | 0   | 22 | RDR2-sensitive |
| TCTTCATGCTGTAGAAGAAGGTAC  | 0   | 10 | RDR2-sensitive |
| TCTTCATGCTGTAGAAGAGGGTAC  | 0   | 22 | RDR2-sensitive |
| TCTTCATGCTGTAGAAGATGGTAC  | 0   | 11 | RDR2-sensitive |
| TCTTCATGCTGTAGGAGAGGGTAC  | 0   | 11 | RDR2-sensitive |
| TCTTCATGTGCGGCATCCTGACCT  | 14  | 0  | RDR2-resistant |
| TCTTCATGTGTAGAAGATCTTGAA  | 16  | 0  | RDR2-resistant |
| TCTTCATTTGATAATAGGCGAACT  | 49  | 0  | RDR2-resistant |
| TCTTCCAAGTACCGTAGCTCGGCT  | 25  | 0  | RDR2-resistant |
| TCTTCCACAGGACGTACACGGGAT  | 0   | 13 | RDR2-sensitive |
| TCTTCCCTGCAGGACCTTCGGCGAC | 19  | 61 | RDR2-sensitive |
| TCTTCGACCACGGCTTCGGCGCTC  | 29  | 1  | RDR2-resistant |
| TCTTCGACGTTGACGGTGCCTGC   | 0   | 10 | RDR2-sensitive |
| TCTTCGCGGAGAGACGGCTCTAAG  | 0   | 9  | RDR2-sensitive |
| TCTTCGGACTCAAGTCGGTATCAC  | 0   | 13 | RDR2-sensitive |
| TCTTCGGACTCAAGTCGGTATGGC  | 1   | 14 | RDR2-sensitive |
| TCTTCGGACTCGAGTCGGTATCAC  | 1   | 36 | RDR2-sensitive |
| TCTTCGGGCTCGAGTCGGTATCAC  | 0   | 12 | RDR2-sensitive |
| TCTTCGTCAAGCCGGCAGGTCTCT  | 0   | 18 | RDR2-sensitive |
| TCTTCGTGATGTGGGAATCGTCGT  | 0   | 10 | RDR2-sensitive |
| TCTTCGTGATGCTGAGTTCGTCGT  | 0   | 9  | RDR2-sensitive |
| TCTTCGTTGGTGTAGCGAGGCGAC  | 1   | 12 | RDR2-sensitive |
| TCTTCTACCACTGTTGGCATCCTT  | 20  | 2  | RDR2-resistant |
| TCTTCTAGTAACAATTGTAGTCGG  | 0   | 13 | RDR2-sensitive |
| TCTTCTATGTTTAGAGTTCGTCGT  | 0   | 15 | RDR2-sensitive |
| TCTTCTCAGCGATTGTGCGGTGCCA | 166 | 10 | RDR2-resistant |
| TCTTCTCAGCGATTGTGCGGTGCCT | 14  | 0  | RDR2-resistant |
| TCTTCTCTTTGGGCTGTTCCGGA   | 39  | 0  | RDR2-resistant |
| TCTTCTGCTGCAGTAATGATCGCT  | 35  | 0  | RDR2-resistant |
| TCTTCTTACAGGATCTTCGGCGAC  | 0   | 20 | RDR2-sensitive |
| TCTTCTTTTGTTCATGTTGGATT   | 34  | 0  | RDR2-resistant |
| TCTTGAACCCTCGGATGGTTGTA   | 22  | 0  | RDR2-resistant |

|                           |     |     |                |
|---------------------------|-----|-----|----------------|
| TCTTGACCTTCGTCCGATGAGCAT  | 0   | 10  | RDR2-sensitive |
| TCTTGACGACACGCGGAACGACGA  | 0   | 21  | RDR2-sensitive |
| TCTTGACGACGCACGGAACGACGA  | 0   | 49  | RDR2-sensitive |
| TCTTGACGATGCACGGAACGACGA  | 0   | 15  | RDR2-sensitive |
| TCTTGACGTGTAGAGGACGAGAAT  | 0   | 12  | RDR2-sensitive |
| TCTTGAGCCGGTTGTAAGTTTGGG  | 27  | 0   | RDR2-resistant |
| TCTTGAGTTGTAGCTAGGGACGTC  | 0   | 9   | RDR2-sensitive |
| TCTTGATCAAGTGAATGATGAGGA  | 36  | 1   | RDR2-resistant |
| TCTTGATCTTGCGGACACGCGCAC  | 0   | 11  | RDR2-sensitive |
| TCTTGATGACGCACGGAACGACGA  | 2   | 105 | RDR2-sensitive |
| TCTTGATGACGCGCGGAACGACGA  | 0   | 28  | RDR2-sensitive |
| TCTTGATGATGTAGGTGATGAGCC  | 18  | 1   | RDR2-resistant |
| TCTTGATTAGGTCGGCTAAAACGG  | 0   | 10  | RDR2-sensitive |
| TCTTGCAGCGATCGACGACGGAGC  | 30  | 0   | RDR2-resistant |
| TCTTGCATTCTGAAGTTATGTCGT  | 0   | 10  | RDR2-sensitive |
| TCTTGCGCCTCTACTGCTGACGGG  | 0   | 14  | RDR2-sensitive |
| TCTTGCGTCTCTACTGCTGACGGG  | 0   | 17  | RDR2-sensitive |
| TCTTGCTGACACGCGGAACGACGA  | 1   | 24  | RDR2-sensitive |
| TCTTGCTGACGCGCAGAACGACGA  | 0   | 10  | RDR2-sensitive |
| TCTTGCTGACGCGCGGAACGACGA  | 4   | 118 | RDR2-sensitive |
| TCTTGCTGGAGGCGTAGAGAACGT  | 0   | 11  | RDR2-sensitive |
| TCTTGCTGTAGACCGAGGTGGCCT  | 1   | 18  | RDR2-sensitive |
| TCTTGGACTATCTCTCAGATGGAT  | 34  | 2   | RDR2-resistant |
| TCTTGGATATGTGACGGTGGCTTC  | 0   | 14  | RDR2-sensitive |
| TCTTGGCGAAGACTGGGCCTCGGG  | 2   | 21  | RDR2-sensitive |
| TCTTGGCGTAGACGAGGATGACGA  | 0   | 13  | RDR2-sensitive |
| TCTTGGCGTGAICTGGCGACCTTT  | 1   | 14  | RDR2-sensitive |
| TCTTGGGATTTCTTGCTGACGCGC  | 1   | 17  | RDR2-sensitive |
| TCTTGGGGATGCACGAACGACGAC  | 0   | 27  | RDR2-sensitive |
| TCTTGGGGCTGCGTAAACAGGTAT  | 56  | 0   | RDR2-resistant |
| TCTTGGGTTGTAICTGCAGAGGCAC | 0   | 9   | RDR2-sensitive |
| TCTTGGTAACCTGGCTGAGAGCAT  | 0   | 13  | RDR2-sensitive |
| TCTTGGTAGACTGGCTGAGAGCAT  | 0   | 18  | RDR2-sensitive |
| TCTTGGTGAICTGTATATCGGTAA  | 0   | 10  | RDR2-sensitive |
| TCTTGGTGGACTGGTGATCCGGTG  | 0   | 11  | RDR2-sensitive |
| TCTTGTAAATTACGGCTTGTAAACC | 0   | 11  | RDR2-sensitive |
| TCTTGTAGAAATTCGGTTCTTCAA  | 0   | 42  | RDR2-sensitive |
| TCTTGTCTGACGACTGGACGGTCC  | 0   | 14  | RDR2-sensitive |
| TCTTGTCTGCTGAGAGTTGGTGGT  | 1   | 12  | RDR2-sensitive |
| TCTTGTCTGGCATTGCAACCAAT   | 19  | 1   | RDR2-resistant |
| TCTTGTGCGCTGGAATGACGACCA  | 0   | 13  | RDR2-sensitive |
| TCTTGTGGGAGCATGGACTATCAG  | 0   | 10  | RDR2-sensitive |
| TCTTGTTAGACTGGTGATCCGGTG  | 0   | 11  | RDR2-sensitive |
| TCTTTAACCGGCAGCCTGAATCGA  | 0   | 25  | RDR2-sensitive |
| TCTTTACCGAGCGCAGGACTTTGC  | 0   | 14  | RDR2-sensitive |
| TCTTTACTTTAGGGGGATTGGAAC  | 14  | 0   | RDR2-resistant |
| TCTTTAGATGGCTCAACACATGTT  | 146 | 1   | RDR2-resistant |
| TCTTTATACTGTAGTAGAGGGTAC  | 0   | 15  | RDR2-sensitive |
| TCTTTATATGCGGATGATGTGGTT  | 54  | 4   | RDR2-resistant |

|                           |     |     |                |
|---------------------------|-----|-----|----------------|
| TCTTTATGCTGTAGTAAGGGGTAC  | 0   | 11  | RDR2-sensitive |
| TCTTTATGGATCGGGAGTTATGGA  | 16  | 0   | RDR2-resistant |
| TCTTTATTCTTGACAGGCAGCAG   | 32  | 1   | RDR2-resistant |
| TCTTTCAGACCTACGATGCAAATT  | 81  | 0   | RDR2-resistant |
| TCTTTCATTA CTGTTGAAGACATA | 18  | 0   | RDR2-resistant |
| TCTTTCACACAGGATGTAGACGGA  | 0   | 40  | RDR2-sensitive |
| TCTTCTGCAGGACCTTCGGCGAC   | 0   | 45  | RDR2-sensitive |
| TCTTTGACTGACTGTGGCGTGGCT  | 0   | 14  | RDR2-sensitive |
| TCTTTGAGAGTGTGGTTGGGCGAA  | 12  | 36  | RDR2-sensitive |
| TCTTTCATAGGCGCGGACGGTCC   | 0   | 9   | RDR2-sensitive |
| TCTTTCATGAGTAGAGCCGGGAT   | 0   | 14  | RDR2-sensitive |
| TCTTTCGCGAGTGCCTTTTGTCCG  | 0   | 19  | RDR2-sensitive |
| TCTTGGAAATATGCTGGAGCGGT   | 22  | 2   | RDR2-resistant |
| TCTTGGACA ACTGAGGACAACAT  | 0   | 12  | RDR2-sensitive |
| TCTTGGACCGCTTGAGAGGGGTT   | 0   | 10  | RDR2-sensitive |
| TCTTGGCGACGTGACGATGGCAT   | 1   | 17  | RDR2-sensitive |
| TCTTGGTAGATTGTCAACATAGG   | 21  | 0   | RDR2-resistant |
| TCTTGTGAATGGAATCGTCGT     | 0   | 13  | RDR2-sensitive |
| TCTTTACTGTAGTGGGAGACTCT   | 0   | 15  | RDR2-sensitive |
| TCTTTAGAGAAGACTGTAAAGGA   | 0   | 20  | RDR2-sensitive |
| TCTTTCATCCTGGACTTTTGGTA   | 20  | 2   | RDR2-resistant |
| TCTTTCGGTTCTGTTTTGTGGTT   | 1   | 12  | RDR2-sensitive |
| TCTTGTTCATGTTGGATTACC     | 101 | 0   | RDR2-resistant |
| TCTTTTTAGTTGTCGCTGGATAGT  | 16  | 42  | RDR2-sensitive |
| TCTTTTTCGCTCGGTCACGGTCAC  | 0   | 10  | RDR2-sensitive |
| TCTTTTTCGTGCTGGGGGATGGAT  | 0   | 22  | RDR2-sensitive |
| TGAAAAAGGTGAAAGACATCAGTT  | 23  | 1   | RDR2-resistant |
| TGAAACAAGGAGACCTACTGGGCT  | 19  | 1   | RDR2-resistant |
| TGAAACCTAGGAGACTGTCCACTG  | 14  | 0   | RDR2-resistant |
| TGAAACGACGTAGCTTTTGCCGGA  | 19  | 1   | RDR2-resistant |
| TGAAACTTGCTTGAAGAATGAGAT  | 19  | 0   | RDR2-resistant |
| TGAAAGAAGTCGCGAGCTGGTCGG  | 5   | 29  | RDR2-sensitive |
| TGAAAGACATGTACCGAGAGGCGT  | 0   | 11  | RDR2-sensitive |
| TGAAAGCACCGTCGGCACGATCTA  | 35  | 8   | RDR2-resistant |
| TGAAAGGCTAGA ACTGATCCGGCT | 0   | 21  | RDR2-sensitive |
| TGAAAGTCGACTAGAGGAGGGTGA  | 0   | 10  | RDR2-sensitive |
| TGAAAGTACTGAATATATGCAGA   | 80  | 1   | RDR2-resistant |
| TGAAATGAATGGTGTGTGGTCTA   | 109 | 5   | RDR2-resistant |
| TGAAATGTAGAAACAGCAAGAAAC  | 14  | 0   | RDR2-resistant |
| TGAAATGTCTGTCGAGCCCGGCAC  | 0   | 9   | RDR2-sensitive |
| TGAAATGTTGGGCTTTTACCGGT   | 42  | 2   | RDR2-resistant |
| TGAAATTATTTGGTTGCGTTGGCT  | 181 | 3   | RDR2-resistant |
| TGAACACACTGATTTTCTGGGCAT  | 34  | 0   | RDR2-resistant |
| TGAACACGCTGATTTTCTGGGCAT  | 39  | 4   | RDR2-resistant |
| TGAACACTCGGCACACGTAGGCAC  | 0   | 9   | RDR2-sensitive |
| TGAACACTCGGCACAGAACGACAC  | 2   | 38  | RDR2-sensitive |
| TGAACACTCGGCACAGAACGGCAC  | 3   | 42  | RDR2-sensitive |
| TGAACACTCGGCACAGGACGACAC  | 6   | 110 | RDR2-sensitive |
| TGAACACTCGGCACAGGTAGGCAC  | 5   | 99  | RDR2-sensitive |

|                           |    |     |                |
|---------------------------|----|-----|----------------|
| TGAACACTCGGCACCGAACGGCAC  | 0  | 9   | RDR2-sensitive |
| TGAACACTCGGTACAGGACGACAC  | 1  | 31  | RDR2-sensitive |
| TGAACAGACTTGACTCGATGCGCT  | 40 | 3   | RDR2-resistant |
| TGAACAGATCTGCTCGGTTTGCCA  | 26 | 0   | RDR2-resistant |
| TGAACAGTTCGGGCAGGAGCGAAT  | 0  | 13  | RDR2-sensitive |
| TGAACAGTTTGACGTTAGTATAAT  | 19 | 0   | RDR2-resistant |
| TGAACATGGTTCGACGGCGAGGCCT | 0  | 10  | RDR2-sensitive |
| TGAACCGAGACGAAGGACGGGCTGA | 0  | 11  | RDR2-sensitive |
| TGAACCCACGGGCTTAGACGGTCT  | 0  | 10  | RDR2-sensitive |
| TGAACCGAGTAGGACGAGAGTCAA  | 0  | 11  | RDR2-sensitive |
| TGAACCGCTGTAGATTGTATTCAT  | 0  | 9   | RDR2-sensitive |
| TGAACCGGACCGAGACGTAGTGAA  | 0  | 9   | RDR2-sensitive |
| TGAACCTTTGAGGGCATCTCGGAT  | 16 | 0   | RDR2-resistant |
| TGAACGACGACTATAGATGGCCAA  | 0  | 10  | RDR2-sensitive |
| TGAACGATGACGGTCTGTCGCTGC  | 0  | 37  | RDR2-sensitive |
| TGAACGCAATCGGACGGTTGGGAT  | 0  | 11  | RDR2-sensitive |
| TGAACGGACCTGGATGTGCAGAGA  | 0  | 12  | RDR2-sensitive |
| TGAACGGATTGCTCGGTTGCGCAT  | 0  | 9   | RDR2-sensitive |
| TGAACGGGACGACTGTGAAGACGA  | 1  | 57  | RDR2-sensitive |
| TGAACGGGCACAAGAGAACGACAC  | 0  | 28  | RDR2-sensitive |
| TGAACGGGTGGCACTGGAATCTCC  | 0  | 18  | RDR2-sensitive |
| TGAACGTAAGTGCAGAGGAACCAT  | 0  | 13  | RDR2-sensitive |
| TGAACGTATGGATGGCTGTGCTGT  | 0  | 28  | RDR2-sensitive |
| TGAACGTCATGCTGCATAGGAGGC  | 0  | 19  | RDR2-sensitive |
| TGAACGTCGACGCTGGCGATGGT   | 1  | 19  | RDR2-sensitive |
| TGAACGTTTTTTTTGGATTGATGGT | 53 | 1   | RDR2-resistant |
| TGAACTAAACAGAAGTTATGGATT  | 18 | 0   | RDR2-resistant |
| TGAACTAAGACTTGGCTTTGTGGA  | 36 | 0   | RDR2-resistant |
| TGAACTACTGCAGGCGTTACTCAT  | 0  | 11  | RDR2-sensitive |
| TGAACTGGAAGTGGAACGAGCCAA  | 0  | 9   | RDR2-sensitive |
| TGAACTGTAAATCGGCAACTACCT  | 0  | 13  | RDR2-sensitive |
| TGAACTGTACATCGATAACGGCTT  | 0  | 15  | RDR2-sensitive |
| TGAACTGTATCAGATCTATGTCGT  | 0  | 10  | RDR2-sensitive |
| TGAACTTTTCACTCTGCAAGCAGCT | 25 | 3   | RDR2-resistant |
| TGAACTTTTCTGGCTTGAGCGCAT  | 6  | 26  | RDR2-sensitive |
| TGAAGAACACGAGCGGACGTACAT  | 0  | 13  | RDR2-sensitive |
| TGAAGACGACTTAAAGTAATTGAT  | 14 | 0   | RDR2-resistant |
| TGAAGACGGAGCCAGCAACGTGAT  | 1  | 44  | RDR2-sensitive |
| TGAAGACGTAGCCAACAACGCGAT  | 0  | 11  | RDR2-sensitive |
| TGAAGACTGAATGTAGGGACGTTT  | 0  | 10  | RDR2-sensitive |
| TGAAGACTGTAAGGGGTAGGCTGC  | 1  | 19  | RDR2-sensitive |
| TGAAGAGCCAAGTAGAACGGAGCC  | 0  | 11  | RDR2-sensitive |
| TGAAGAGGCATCTGTGAACCTCAA  | 0  | 10  | RDR2-sensitive |
| TGAAGATCGGGCATCGTGACGCAT  | 2  | 124 | RDR2-sensitive |
| TGAAGATTTGAACTTGGAAAGGCAC | 14 | 0   | RDR2-resistant |
| TGAAGCCTTGACGGACTCCAGCAT  | 23 | 0   | RDR2-resistant |
| TGAAGCGGGTGAGTAGCAGTAGGC  | 40 | 5   | RDR2-resistant |
| TGAAGCGGTCGCTGTAGACGGTGC  | 0  | 10  | RDR2-sensitive |
| TGAAGCTCTGGTCACGAGGTGCAT  | 0  | 9   | RDR2-sensitive |

|                           |     |    |                |
|---------------------------|-----|----|----------------|
| TGAAGGAACTAGGGCAGACGCTGT  | 0   | 10 | RDR2-sensitive |
| TGAAGGACGCCGACGACTGCACGG  | 39  | 2  | RDR2-resistant |
| TGAAGGACTGCCACACGCGCGCGC  | 0   | 65 | RDR2-sensitive |
| TGAAGGACTGTCACACGCGCGCAC  | 0   | 19 | RDR2-sensitive |
| TGAAGGACTTGCCATCGTGCCGT   | 15  | 0  | RDR2-resistant |
| TGAAGGATGGACGATCACGGTGGA  | 27  | 0  | RDR2-resistant |
| TGAAGGCCGTCGTTGTTTCAGGCAA | 0   | 9  | RDR2-sensitive |
| TGAAGGGCTGAAGGCGTGGATGGT  | 0   | 16 | RDR2-sensitive |
| TGAAGGTAGACCCTGTTGATGGCG  | 72  | 15 | RDR2-resistant |
| TGAAGTAGAACGGATCGGCTCCAT  | 0   | 12 | RDR2-sensitive |
| TGAAGTTCGTCTAGGCTACGTCAT  | 0   | 44 | RDR2-sensitive |
| TGAAGTTCGTCTCGGACACGTCAT  | 0   | 60 | RDR2-sensitive |
| TGAAGTTTATGACTGTACAGCGGT  | 25  | 0  | RDR2-resistant |
| TGAATACCGCAGTAACTTGACATC  | 25  | 0  | RDR2-resistant |
| TGAATAGGTCGGTTTAGAGGTGGT  | 87  | 6  | RDR2-resistant |
| TGAATAGTTGTTGACGCTGTGTTT  | 63  | 6  | RDR2-resistant |
| TGAATATTTGTAGAAGTCTCGGAT  | 0   | 17 | RDR2-sensitive |
| TGAATCAAGTTAGGACCGGATCAT  | 0   | 14 | RDR2-sensitive |
| TGAATCATCGCTCGAACTTGGGTT  | 37  | 4  | RDR2-resistant |
| TGAATCGGGTTGGACCGTGCCGGC  | 0   | 14 | RDR2-sensitive |
| TGAATCTGAGCGTCGGCAGGGGCA  | 28  | 4  | RDR2-resistant |
| TGAATCTGGTGAGCCTGGCTTCGT  | 0   | 10 | RDR2-sensitive |
| TGAATGATTGTATGTAGATGGCTT  | 25  | 1  | RDR2-resistant |
| TGAATGGCACATCAAACCTCTGTT  | 18  | 0  | RDR2-resistant |
| TGAATGGGGACGCAGATGAGGGAT  | 14  | 0  | RDR2-resistant |
| TGAATGTAAAAAATCTGAAGACAT  | 0   | 9  | RDR2-sensitive |
| TGAATGTAGTTGTTTTGGCTTATT  | 17  | 0  | RDR2-resistant |
| TGAATGTCTGAAGCTAGTTCCGAAA | 27  | 0  | RDR2-resistant |
| TGAATTATAGCGGAGCGCCTCTGG  | 0   | 11 | RDR2-sensitive |
| TGAATTCTGCACCCGGAAGGCGAT  | 0   | 13 | RDR2-sensitive |
| TGAATTTGTGGTTCTGATCGCATG  | 117 | 0  | RDR2-resistant |
| TGACAAAGACTAGAGCTGGAGTGG  | 16  | 0  | RDR2-resistant |
| TGACAACCCGATGGATGATGGCTC  | 0   | 9  | RDR2-sensitive |
| TGACAAGTTCGATCGTTCCACCAC  | 54  | 8  | RDR2-resistant |
| TGACAAGTTCTCTGAAAAGGCGAA  | 136 | 6  | RDR2-resistant |
| TGACAATATTCAGTAGACTTAAGA  | 93  | 2  | RDR2-resistant |
| TGACACCGTACGAGGCTTGGCATG  | 66  | 5  | RDR2-resistant |
| TGACACCTTTATCCTGACGCGCGC  | 0   | 9  | RDR2-sensitive |
| TGACACGACTGGAGCTAGGCCCGT  | 0   | 40 | RDR2-sensitive |
| TGACACGCCAATACCGTCGATCGT  | 0   | 9  | RDR2-sensitive |
| TGACACGTGGACAGGTTTTATGAT  | 48  | 1  | RDR2-resistant |
| TGACACTCGGCAAAGACTGACGGC  | 0   | 9  | RDR2-sensitive |
| TGACACTGATAGGCGTGAGGACAT  | 0   | 9  | RDR2-sensitive |
| TGACACTGCGGACGGTGAGAGGCG  | 0   | 12 | RDR2-sensitive |
| TGACACTGTACGAGGCTTGGCATG  | 61  | 3  | RDR2-resistant |
| TGACAGAAGGACAGCGCCGCTGC   | 3   | 31 | RDR2-sensitive |
| TGACAGCGGCCTCTAGCAAGACAT  | 1   | 13 | RDR2-sensitive |
| TGACAGGACGGGACGATACCTCAA  | 0   | 11 | RDR2-sensitive |
| TGACAGGACGGGACGGGATGGAAC  | 0   | 10 | RDR2-sensitive |

|                           |    |    |                |
|---------------------------|----|----|----------------|
| TGACAGGACGGGATGGGACGGGAC  | 2  | 41 | RDR2-sensitive |
| TGACAGGACGGGATGGGATGGGAC  | 0  | 51 | RDR2-sensitive |
| TGACAGGACTGTCCGGTGTGTCAG  | 0  | 14 | RDR2-sensitive |
| TGACAGTAGTACTGCTTGGGGCGT  | 0  | 10 | RDR2-sensitive |
| TGACAGTATGACACGACGGAGCAC  | 0  | 13 | RDR2-sensitive |
| TGACAGTGCTCTCTACAGGACGGT  | 0  | 15 | RDR2-sensitive |
| TGACAGTGCTCTCTGTAGAGGCGT  | 0  | 11 | RDR2-sensitive |
| TGACAGTGTTCTCTGCACAGACGC  | 0  | 68 | RDR2-sensitive |
| TGACATCATAAGGCCTGTGGCATG  | 43 | 9  | RDR2-resistant |
| TGACATCGCTCAACGGCAGAACAG  | 0  | 15 | RDR2-sensitive |
| TGACATGACGGGATGGGACGGGAC  | 0  | 14 | RDR2-sensitive |
| TGACATGTAGGGTAAGTGGCACAT  | 0  | 11 | RDR2-sensitive |
| TGACATGTATGCTTAGTTGACGAA  | 24 | 0  | RDR2-resistant |
| TGACATTTTGCTGATAGGGCCGCA  | 76 | 3  | RDR2-resistant |
| TGACCACCATAAGTGACTGATCGT  | 0  | 22 | RDR2-sensitive |
| TGACCAGAGAGCACCGCCGCGGT   | 0  | 11 | RDR2-sensitive |
| TGACCAGCGCGGCATGTACAACCT  | 0  | 9  | RDR2-sensitive |
| TGACCAGTAGAGTTCGATCCGCAT  | 19 | 0  | RDR2-resistant |
| TGACCAGTCTGACAGAAGGACAGC  | 4  | 19 | RDR2-sensitive |
| TGACCAGTCTTGGCTGCATAACGA  | 18 | 0  | RDR2-resistant |
| TGACCCATTTTCGTGTCGGATCGT  | 0  | 10 | RDR2-sensitive |
| TGACCCTGGCTGACCTGATACGGC  | 0  | 23 | RDR2-sensitive |
| TGACCCTGGCTGACCTGATAGGCT  | 0  | 24 | RDR2-sensitive |
| TGACCGAGGCTGTGAAGACCACAA  | 0  | 17 | RDR2-sensitive |
| TGACCGCCGGTGGCAGAAGAACAC  | 0  | 9  | RDR2-sensitive |
| TGACCGGCCTGACAAGAGGACAGC  | 1  | 17 | RDR2-sensitive |
| TGACCGGCCTGACAGAAGGACAGC  | 17 | 94 | RDR2-sensitive |
| TGACCGGCTGCATGAGGATTTTCT  | 33 | 0  | RDR2-resistant |
| TGACCGGTATGCTTTTTGATCAAC  | 34 | 7  | RDR2-resistant |
| TGACCGGTCTGACAAGAGGACAGC  | 0  | 23 | RDR2-sensitive |
| TGACCGGTCTGACAGAAGGACAGC  | 6  | 61 | RDR2-sensitive |
| TGACCGTAGGGACGTGAAGGTCAT  | 25 | 4  | RDR2-resistant |
| TGACCGTCAGGCAGAGGACCCTAG  | 0  | 10 | RDR2-sensitive |
| TGACCGTCTACAGTAGGGCATCGG  | 0  | 45 | RDR2-sensitive |
| TGACCGTGGCTGGGCTGTCCGGCGC | 1  | 23 | RDR2-sensitive |
| TGACCGTTATGCCTCTGACCGTT   | 0  | 9  | RDR2-sensitive |
| TGACCGTTCTGCCTCTGACCGTT   | 1  | 16 | RDR2-sensitive |
| TGACCGTTGGCGCGCATACTTTT   | 17 | 0  | RDR2-resistant |
| TGACCTACTCCTCGGACTGCGGCA  | 0  | 13 | RDR2-sensitive |
| TGACCTCTCGGTGGTTGTCTCGGT  | 65 | 1  | RDR2-resistant |
| TGACCTGATAGGCTGATACGGTAA  | 1  | 63 | RDR2-sensitive |
| TGACCTGCCTGACGGTGCTCTCAC  | 1  | 17 | RDR2-sensitive |
| TGACCTGTATCTCTCTGATGGCGT  | 0  | 32 | RDR2-sensitive |
| TGACCTGTGACTGGCAAACAACAT  | 0  | 17 | RDR2-sensitive |
| TGACCTGTGGGGCAGAGATGACAG  | 0  | 9  | RDR2-sensitive |
| TGACCTTGTCGAAGCTGTATTGCA  | 16 | 0  | RDR2-resistant |
| TGACGAAGAGACAGGGTCACTCGG  | 2  | 17 | RDR2-sensitive |
| TGACGAAGTACGGCTGCGGAGTAA  | 0  | 9  | RDR2-sensitive |
| TGACGACACACGGAATGACGACAG  | 0  | 12 | RDR2-sensitive |



|                           |    |    |                |
|---------------------------|----|----|----------------|
| TGACGACACGCGGAACGACGACGA  | 1  | 12 | RDR2-sensitive |
| TGACGACACTAGACACACAGACAT  | 0  | 9  | RDR2-sensitive |
| TGACGACACTAGACACACAGACGT  | 3  | 27 | RDR2-sensitive |
| TGACGACAGTAGACACACAGACGT  | 0  | 23 | RDR2-sensitive |
| TGACGACAGTAGACACAGAGACGT  | 0  | 9  | RDR2-sensitive |
| TGACGACCGTTTCGAGAGACTGCAT | 0  | 23 | RDR2-sensitive |
| TGACGACGACGGAGACTTTGCCGA  | 0  | 9  | RDR2-sensitive |
| TGACGACGAGGAACACGAGCGGAC  | 0  | 9  | RDR2-sensitive |
| TGACGACGGACAGCGTGAGTACAA  | 0  | 12 | RDR2-sensitive |
| TGACGACGTGCGGCGTGAGTACAA  | 1  | 38 | RDR2-sensitive |
| TGACGACTGGGCAGTGGACAACGC  | 0  | 15 | RDR2-sensitive |
| TGACGAGCCGGACGGTTCGCTCGT  | 0  | 11 | RDR2-sensitive |
| TGACGATGATGGAGCATGTGACAC  | 0  | 28 | RDR2-sensitive |
| TGACGATGGCGCCAAGAAGACTGA  | 0  | 13 | RDR2-sensitive |
| TGACGATTTGACGGCCACAGACGC  | 0  | 11 | RDR2-sensitive |
| TGACGCAATGCGGACTGCAGGCAC  | 0  | 10 | RDR2-sensitive |
| TGACGCACGGAACGACGACGAGAT  | 3  | 18 | RDR2-sensitive |
| TGACGCACGGAATGACGACGAGAT  | 0  | 16 | RDR2-sensitive |
| TGACGCAGGACGACCGTTGAAACT  | 49 | 1  | RDR2-resistant |
| TGACGCAGTAGTCGCCGAACGCAT  | 0  | 29 | RDR2-sensitive |
| TGACGCGATGCAGACTGCGAGCAC  | 0  | 10 | RDR2-sensitive |
| TGACGCGCATGAATGGATTAACGA  | 21 | 2  | RDR2-resistant |
| TGACGCGCGGAACGACGACAAGAT  | 0  | 9  | RDR2-sensitive |
| TGACGCGCGGAACGACGACGAGAT  | 4  | 73 | RDR2-sensitive |
| TGACGCGTAGGACAGTTCGGCTAG  | 0  | 36 | RDR2-sensitive |
| TGACGCTGAGCTCTGACGTGGCGT  | 0  | 10 | RDR2-sensitive |
| TGACGCTGTGTTCTGATTTAGAA   | 39 | 0  | RDR2-resistant |
| TGACGCTTTTAAGTAGGACGACAT  | 0  | 41 | RDR2-sensitive |
| TGACGGACCAGACACAAAACGGGC  | 0  | 9  | RDR2-sensitive |
| TGACGGACCAGAGGACGAACGCGT  | 0  | 15 | RDR2-sensitive |
| TGACGGACGACACGGCTAGGCTCC  | 0  | 12 | RDR2-sensitive |
| TGACGGAGAGTTGATGCAGATCTG  | 0  | 13 | RDR2-sensitive |
| TGACGGCACTAGACATACAGACGT  | 0  | 10 | RDR2-sensitive |
| TGACGGCACTCTAGTTGAAGAAGG  | 56 | 2  | RDR2-resistant |
| TGACGGGAGGGAAGGGAGCGGATC  | 0  | 15 | RDR2-sensitive |
| TGACGGGCGTGAGTCGGCGATCAT  | 0  | 14 | RDR2-sensitive |
| TGACGGGCTTAGAGGTAAACGGGC  | 0  | 11 | RDR2-sensitive |
| TGACGGGCTTAGAGGTAAACGGGT  | 0  | 14 | RDR2-sensitive |
| TGACGGGGAATCGATGGGGACGGT  | 24 | 3  | RDR2-resistant |
| TGACGGGTGCGTCTGAAACACGGC  | 0  | 16 | RDR2-sensitive |
| TGACGGTACTCTCTGCGGAGGCGT  | 0  | 10 | RDR2-sensitive |
| TGACGGTACTCTCTGCGGGAGCGT  | 0  | 11 | RDR2-sensitive |
| TGACGGTCACTGTGGTGTAGGCAC  | 3  | 21 | RDR2-sensitive |
| TGACGGTCGTCAGCTGTAGACGGC  | 1  | 22 | RDR2-sensitive |
| TGACGGTCTGGCCATAGATACGGA  | 0  | 9  | RDR2-sensitive |
| TGACGGTGACCTGCCTGACGGTGC  | 0  | 21 | RDR2-sensitive |
| TGACGGTGCTCTCTGCAACGGCGC  | 0  | 20 | RDR2-sensitive |
| TGACGGTGCTCTCTGCGGAAGCGT  | 0  | 14 | RDR2-sensitive |
| TGACGGTGCTCTCTGGTCAGACGC  | 0  | 20 | RDR2-sensitive |

|                           |     |    |                |
|---------------------------|-----|----|----------------|
| TGACGGTTGTCAGACGGACCGGAA  | 0   | 16 | RDR2-sensitive |
| TGACGTACGATGACGGTGAACAG   | 0   | 13 | RDR2-sensitive |
| TGACGTAGAGCACTCCGGTGGCGT  | 0   | 13 | RDR2-sensitive |
| TGACGTGAATTGCATTGGAACGGT  | 0   | 16 | RDR2-sensitive |
| TGACGTGAGCTGAAGCCGGGTGAG  | 0   | 17 | RDR2-sensitive |
| TGACGTGGACTGGAGCTACGGTGA  | 0   | 9  | RDR2-sensitive |
| TGACGTTATCTATACAGTCGTCGG  | 0   | 10 | RDR2-sensitive |
| TGACGTTGTGCGCAGTAGACGAGGG | 128 | 49 | RDR2-resistant |
| TGACTAAACCGGACTAAAGGGCAT  | 0   | 10 | RDR2-sensitive |
| TGACTAAATAAATGAGATCGTCAC  | 25  | 3  | RDR2-resistant |
| TGACTACGCTTAGCTGAACGACGA  | 0   | 11 | RDR2-sensitive |
| TGACTAGATAGTTTGTATCGGAT   | 21  | 0  | RDR2-resistant |
| TGACTATCGCTGCCCTTGAGTGCC  | 26  | 0  | RDR2-resistant |
| TGACTCAAGAAACCTCAAGGGCAT  | 0   | 19 | RDR2-sensitive |
| TGACTCGAGCGACTGAGAGAGGCT  | 0   | 14 | RDR2-sensitive |
| TGACTCGTCCGAGCTCGAGCTGGC  | 0   | 10 | RDR2-sensitive |
| TGACTCTAGATCTCCAAACCGGAT  | 0   | 9  | RDR2-sensitive |
| TGACTCTGACCCCCGCCGGTGTT   | 14  | 0  | RDR2-resistant |
| TGACTCTGACGCCCGGAAGCGCGG  | 0   | 10 | RDR2-sensitive |
| TGACTCTGCGATACGGCTGATCGG  | 29  | 5  | RDR2-resistant |
| TGACTCTGGTCACTGTTACGGCA   | 56  | 2  | RDR2-resistant |
| TGACTCTGTAGCAACGTACGGGCA  | 0   | 9  | RDR2-sensitive |
| TGACTCTTGACAAGATTTATGGCC  | 23  | 3  | RDR2-resistant |
| TGACTGAAGAGATTAGTTCGTCCT  | 17  | 0  | RDR2-resistant |
| TGACTGACGCGACCTGACATGGCA  | 3   | 22 | RDR2-sensitive |
| TGACTGCTTCCTCTGTAGCAGGAA  | 0   | 10 | RDR2-sensitive |
| TGACTGGAAGCGCGATAACCCTAC  | 0   | 16 | RDR2-sensitive |
| TGACTGGAAGTAGGGACGTTCTGC  | 0   | 18 | RDR2-sensitive |
| TGACTGGCTGATGGAGCAAGGCAA  | 44  | 4  | RDR2-resistant |
| TGACTGGGAGACGACGACCTAGAC  | 20  | 43 | RDR2-sensitive |
| TGACTGGGAGACGACGGCCTAGAT  | 1   | 16 | RDR2-sensitive |
| TGACTGGTAGACAGAGGTCAGCAC  | 0   | 9  | RDR2-sensitive |
| TGACTGTACGCAAGGAACGGTAAC  | 0   | 9  | RDR2-sensitive |
| TGACTGTACGTTGCGATGGCTCAC  | 0   | 11 | RDR2-sensitive |
| TGACTGTAGCGTTAGCACGGACGT  | 0   | 13 | RDR2-sensitive |
| TGACTGTATCTGGCCAGCTAGGCT  | 0   | 30 | RDR2-sensitive |
| TGACTGTATGTTGCGACGGCTCAC  | 0   | 16 | RDR2-sensitive |
| TGACTGTTCGTATGGTGCACCGGAC | 4   | 32 | RDR2-sensitive |
| TGACTGTCTGCTTGGGCGTGCCCT  | 22  | 1  | RDR2-resistant |
| TGACTGTGACGCTGGAAGACTGCT  | 0   | 9  | RDR2-sensitive |
| TGACTGTGAGAGCGAGATGGGAAC  | 0   | 19 | RDR2-sensitive |
| TGACTGTGAGAGCGGGATAGGAAC  | 0   | 10 | RDR2-sensitive |
| TGACTGTGAGAGCGGGATGGGAAC  | 0   | 80 | RDR2-sensitive |
| TGACTGTGAGAGCGGGATTGGAAC  | 3   | 66 | RDR2-sensitive |
| TGACTGTGCCGAGCGGGTTGAGAAC | 0   | 11 | RDR2-sensitive |
| TGACTGTGGAGAAAAGTTGGCTGT  | 0   | 10 | RDR2-sensitive |
| TGACTGTGGCATCGGCTTAGAGAA  | 0   | 13 | RDR2-sensitive |
| TGACTGTGGGAAAAGGTGGCTGT   | 0   | 36 | RDR2-sensitive |
| TGACTGTGTCTCGTGAGGCAGCGG  | 0   | 30 | RDR2-sensitive |

|                           |     |     |                |
|---------------------------|-----|-----|----------------|
| TGACTGTTATCTGCATATGATGGT  | 0   | 12  | RDR2-sensitive |
| TGACTGTTATGAAGGTATTGTTAT  | 0   | 15  | RDR2-sensitive |
| TGACTGTTTCATTGCCATTTGAGG  | 19  | 0   | RDR2-resistant |
| TGACTTGAAGTGGGAGGAGGATGT  | 0   | 13  | RDR2-sensitive |
| TGACTTGGACTCGCAGCAGATCGA  | 3   | 73  | RDR2-sensitive |
| TGAGAAAGATGAATGAGTCTGCAT  | 0   | 9   | RDR2-sensitive |
| TGAGAACCGAGATCGTGGACACGC  | 0   | 16  | RDR2-sensitive |
| TGAGAAGACTGTTGTAGATGGCAA  | 26  | 0   | RDR2-resistant |
| TGAGACAGCAAGAGTGAGCTCACA  | 0   | 17  | RDR2-sensitive |
| TGAGACCGACGCAGGGAACAGAGC  | 1   | 13  | RDR2-sensitive |
| TGAGACCGGGCGGGTGACTTGAC   | 13  | 31  | RDR2-sensitive |
| TGAGACGAGAGCGCAGATGACCAC  | 1   | 15  | RDR2-sensitive |
| TGAGACGAGGAGCACAGATCTGGC  | 0   | 42  | RDR2-sensitive |
| TGAGACGGAGGACGAGAGTCAGGA  | 0   | 21  | RDR2-sensitive |
| TGAGACTAATGGCTCTCCAAGAGA  | 30  | 1   | RDR2-resistant |
| TGAGACTCGGAGGCAGACCAAAC   | 30  | 1   | RDR2-resistant |
| TGAGACTCTGAGAATAGTTGCTGC  | 16  | 0   | RDR2-resistant |
| TGAGACTCTTGAAGCTGCGCGCAT  | 0   | 12  | RDR2-sensitive |
| TGAGACTGAGACCCACTTGTCCGGC | 0   | 18  | RDR2-sensitive |
| TGAGACTGGAGTAGGAGCCGACGG  | 0   | 12  | RDR2-sensitive |
| TGAGAGCAAGCGGATGAGGGACAA  | 0   | 14  | RDR2-sensitive |
| TGAGAGCTCTTTCTTGATTCTATG  | 24  | 1   | RDR2-resistant |
| TGAGAGCTGAGGATGTGAGGACGG  | 0   | 10  | RDR2-sensitive |
| TGAGAGGACCAGGCTCAAGAGAGC  | 0   | 23  | RDR2-sensitive |
| TGAGAGGCGGCATGCAGGACAGAC  | 1   | 21  | RDR2-sensitive |
| TGAGAGTAGTGGAAGGCGGGCTGG  | 227 | 24  | RDR2-resistant |
| TGAGAGTCTTTTCTTTAGTCGGGT  | 32  | 6   | RDR2-resistant |
| TGAGAGTGGGAGGCAGAACCGTGC  | 0   | 10  | RDR2-sensitive |
| TGAGATATCTGGACCGTCTGCGGT  | 0   | 9   | RDR2-sensitive |
| TGAGATCGCAGAACGGCAGAACGG  | 0   | 44  | RDR2-sensitive |
| TGAGATCGCAGAATGGCAGAACAC  | 0   | 19  | RDR2-sensitive |
| TGAGATCGGGCTTGCTAGACAGGC  | 0   | 11  | RDR2-sensitive |
| TGAGATCTAGAACGGGCTCGACGA  | 0   | 17  | RDR2-sensitive |
| TGAGATCTCGACAGTCCGACCCAT  | 0   | 16  | RDR2-sensitive |
| TGAGATCTCGGCAGTCACGGATGT  | 0   | 9   | RDR2-sensitive |
| TGAGATCTCTCGGCAGGAAACAA   | 0   | 9   | RDR2-sensitive |
| TGAGATGATGCTAGGCTCGGCAAC  | 33  | 0   | RDR2-resistant |
| TGAGATTGATTGTAGCTATTGGCT  | 716 | 54  | RDR2-resistant |
| TGAGATTGCAGAACGGTAGGCTAC  | 0   | 34  | RDR2-sensitive |
| TGAGATTGTAACATACAGGTGCT   | 37  | 1   | RDR2-resistant |
| TGAGATTGTCTAACGGCAGAACGG  | 0   | 10  | RDR2-sensitive |
| TGAGATTGTTCCAGGAGATGAGAT  | 71  | 1   | RDR2-resistant |
| TGAGATTTTATATTTTTTCGTCGG  | 58  | 1   | RDR2-resistant |
| TGAGCAACTCTGTGAGGCAGACAG  | 0   | 15  | RDR2-sensitive |
| TGAGCACGTACTCTCCGTCCGCAA  | 0   | 14  | RDR2-sensitive |
| TGAGCACTGTGTGATGATGTCCAT  | 7   | 104 | RDR2-sensitive |
| TGAGCAGAGCGCCGGTGACCTCGC  | 0   | 15  | RDR2-sensitive |
| TGAGCAGATAGAACCGTGCACCAC  | 0   | 19  | RDR2-sensitive |
| TGAGCATGTAGACGCCACCGACAT  | 0   | 29  | RDR2-sensitive |



|                          |     |    |                |
|--------------------------|-----|----|----------------|
| TGAGGACGTGACACGGCAGGCTAG | 0   | 14 | RDR2-sensitive |
| TGAGGACGTGTATATGATACAGCC | 38  | 1  | RDR2-resistant |
| TGAGGACTAGACTGAGACGGAGGA | 0   | 13 | RDR2-sensitive |
| TGAGGACTGAACAGGCCGAATCGG | 1   | 20 | RDR2-sensitive |
| TGAGGAGAACTGGGCTGACGACGT | 0   | 9  | RDR2-sensitive |
| TGAGGAGAGGTAGAGGAAGACCGA | 26  | 4  | RDR2-resistant |
| TGAGGAGCCAAGTAGAACGGAGCC | 1   | 22 | RDR2-sensitive |
| TGAGGAGCCAAGTAGAACGGAGTC | 0   | 18 | RDR2-sensitive |
| TGAGGAGGCAGAACCGTGCACCAC | 0   | 36 | RDR2-sensitive |
| TGAGGAGGCAGAACCGTGCACCGC | 0   | 12 | RDR2-sensitive |
| TGAGGAGGCGGCGATTCTGGAGGC | 0   | 11 | RDR2-sensitive |
| TGAGGATCTAGACGACTATTATAA | 56  | 0  | RDR2-resistant |
| TGAGGATGTGCTAGATTGCGCTTC | 130 | 16 | RDR2-resistant |
| TGAGGCAACAGAGAACATACCCAC | 0   | 9  | RDR2-sensitive |
| TGAGGCACGTAGGACTGTGCAGGC | 0   | 11 | RDR2-sensitive |
| TGAGGCATCGGACGAGACGAGCGC | 0   | 12 | RDR2-sensitive |
| TGAGGCGAGGACCATCATTATCGT | 0   | 10 | RDR2-sensitive |
| TGAGGCGATGGTAGCAGGGGAACA | 35  | 0  | RDR2-resistant |
| TGAGGCGCTGTGCAGGAAGGGAAT | 18  | 0  | RDR2-resistant |
| TGAGGCGGCTTGTAGGACGGAGGC | 4   | 23 | RDR2-sensitive |
| TGAGGCTCTGATACCAGATGATGC | 2   | 20 | RDR2-sensitive |
| TGAGGCTGAGCTGGTGGACACGGT | 0   | 20 | RDR2-sensitive |
| TGAGGCTGATCTGAATTGGCGCTT | 17  | 0  | RDR2-resistant |
| TGAGGCTTTGATACCAGATGATGC | 1   | 41 | RDR2-sensitive |
| TGAGGCTTTGATACCAGATGATGT | 2   | 27 | RDR2-sensitive |
| TGAGGGACAACAGGGGACAACACT | 4   | 34 | RDR2-sensitive |
| TGAGGGACCTTTGTTTGCTCGGTA | 105 | 1  | RDR2-resistant |
| TGAGGGCAGCAGTGGCACACAGAA | 0   | 12 | RDR2-sensitive |
| TGAGGGCATGTGGAGGCGGGGTTT | 0   | 11 | RDR2-sensitive |
| TGAGGGCCCGGAGACGCTTTAGTA | 14  | 0  | RDR2-resistant |
| TGAGGGCTTGTTTCGTTACACCAA | 0   | 10 | RDR2-sensitive |
| TGAGGGGCAACGGTACACTAACCT | 18  | 0  | RDR2-resistant |
| TGAGGTAACACAGCTCGGCGCCAT | 0   | 13 | RDR2-sensitive |
| TGAGGTAACTGGTGTAGACGACAA | 0   | 9  | RDR2-sensitive |
| TGAGGTCAAAGTAGGACGGGGCAG | 1   | 29 | RDR2-sensitive |
| TGAGGTCAAAGTAGGATGAGTCGG | 0   | 12 | RDR2-sensitive |
| TGAGGTGACGGTTCGAATACTAA  | 2   | 19 | RDR2-sensitive |
| TGAGGTCTATGTAGGATGAGGCGT | 0   | 11 | RDR2-sensitive |
| TGAGGTCTCTGTGACTGGAGTCGT | 0   | 31 | RDR2-sensitive |
| TGAGGTGAGGAATTGTGGACGGAT | 0   | 11 | RDR2-sensitive |
| TGAGGTGGTGTGGATCAACTCAT  | 0   | 9  | RDR2-sensitive |
| TGAGGTTCTGTTACCGGTACTION | 0   | 20 | RDR2-sensitive |
| TGAGGTTGCAGGATGGCAGAACGG | 0   | 10 | RDR2-sensitive |
| TGAGGTTGCTGTCCTTGTCGTCGC | 0   | 17 | RDR2-sensitive |
| TGAGTAGCAGGACGCGGAACCTAG | 0   | 11 | RDR2-sensitive |
| TGAGTAGTGATCGCCGGGCGGCAG | 0   | 16 | RDR2-sensitive |
| TGAGTATCTGTAATACCAGAACGA | 225 | 0  | RDR2-resistant |
| TGAGTCTGGAGAAGGTGGACCCGG | 34  | 3  | RDR2-resistant |
| TGAGTCTGTTAGTCGTGCCGGGCC | 0   | 10 | RDR2-sensitive |

|                          |     |    |                |
|--------------------------|-----|----|----------------|
| TGAGTGAAGTCTAGACACGGCCT  | 0   | 14 | RDR2-sensitive |
| TGAGTGACTGTGCGTTGCAACGGA | 0   | 10 | RDR2-sensitive |
| TGAGTGAGGACAAAGTGCGCACAA | 3   | 30 | RDR2-sensitive |
| TGAGTGGATGTTTTGACGACGGC  | 18  | 1  | RDR2-resistant |
| TGAGTGTAGAAAAGTGGGAGACGC | 0   | 25 | RDR2-sensitive |
| TGAGTGTGACTGCCTGCTGCCAT  | 0   | 16 | RDR2-sensitive |
| TGAGTTATACTGTTAAGATGAGCC | 24  | 1  | RDR2-resistant |
| TGAGTTCTTGTCTGTCTTGGGAT  | 16  | 0  | RDR2-resistant |
| TGAGTTGGGCCGACCACGACGTGC | 0   | 9  | RDR2-sensitive |
| TGAGTTGGTATGTTTTATGGTTGC | 20  | 0  | RDR2-resistant |
| TGAGTTGTAGCTAGGGACGTCCAC | 0   | 10 | RDR2-sensitive |
| TGAGTTTCAAATTAGATCTCGGTG | 124 | 1  | RDR2-resistant |
| TGAGTTTGTGAGGTTGATATCGGA | 35  | 0  | RDR2-resistant |
| TGAGTTTGTGCGTAGGTGCGGCGT | 0   | 17 | RDR2-sensitive |
| TGATAAATCGATTGCGATCGCCGT | 0   | 16 | RDR2-sensitive |
| TGATAACTTGACGGATCGCACGGC | 25  | 3  | RDR2-resistant |
| TGATAATAGCGAACTCCACTAAA  | 42  | 0  | RDR2-resistant |
| TGATACCAACTGTGACGGAACCGC | 0   | 11 | RDR2-sensitive |
| TGATACCTCGTTAGGCTGCACGGT | 14  | 0  | RDR2-resistant |
| TGATACTGTTAGAAAGTTAGGCAT | 0   | 9  | RDR2-sensitive |
| TGATAGGGTTCGCAAGCTACTGAG | 27  | 0  | RDR2-resistant |
| TGATAGTCGTAGAGTAGCGTCGGC | 135 | 0  | RDR2-resistant |
| TGATAGTGACTGTCTGCTTGGGCG | 16  | 0  | RDR2-resistant |
| TGATATAGTAGTCGTCGAACGCGC | 1   | 21 | RDR2-sensitive |
| TGATATCTGGCTTTCACGAAGGC  | 17  | 0  | RDR2-resistant |
| TGATATTATCGGAACTTACATGGC | 19  | 0  | RDR2-resistant |
| TGATCAACGTTCGAGTAGCAGCAA | 0   | 48 | RDR2-sensitive |
| TGATCACCTGGCAGAACCTACGC  | 0   | 9  | RDR2-sensitive |
| TGATCAGTTGTTTCTGTTGGCAT  | 21  | 0  | RDR2-resistant |
| TGATCATCGACGGAGGGCAGCTGT | 0   | 16 | RDR2-sensitive |
| TGATCATGTTGGACGGGCCGGCTC | 0   | 23 | RDR2-sensitive |
| TGATCCAAGACTCCGAGCGAACGG | 0   | 9  | RDR2-sensitive |
| TGATCCACGCGCGGTGCACTGACC | 141 | 2  | RDR2-resistant |
| TGATCCTCTAGAACCTCGATGGTG | 24  | 0  | RDR2-resistant |
| TGATCCTCTGCGTCAGACACGGAC | 0   | 12 | RDR2-sensitive |
| TGATCCTGACATCGTTGGCGACGC | 0   | 12 | RDR2-sensitive |
| TGATCCTTCGATGTCGGCTCTTCC | 61  | 6  | RDR2-resistant |
| TGATCGACCAGTGACGGAGGACAC | 0   | 10 | RDR2-sensitive |
| TGATCGAGCGATGACATTTATTCT | 22  | 1  | RDR2-resistant |
| TGATCGGACGGTCCACGATGGCGT | 0   | 54 | RDR2-sensitive |
| TGATCGGATACTCTGCACCGCCT  | 0   | 12 | RDR2-sensitive |
| TGATCGGCACCAGACGAAGACCGG | 0   | 18 | RDR2-sensitive |
| TGATCTAGGTTGGACGGTCCGCAT | 0   | 16 | RDR2-sensitive |
| TGATCTCTGCGAGGACGAGAACGG | 0   | 12 | RDR2-sensitive |
| TGATCTGCGGTTTCTGGACGGTAC | 0   | 10 | RDR2-sensitive |
| TGATGACATGTTGATTACAGGCGA | 24  | 0  | RDR2-resistant |
| TGATGACATTGGAGTCTTGGCGTG | 32  | 4  | RDR2-resistant |
| TGATGACCTGTACCGGCCGAGCGT | 0   | 13 | RDR2-sensitive |
| TGATGACGCACGGAACGACGACGA | 0   | 11 | RDR2-sensitive |

|                           |     |    |                |
|---------------------------|-----|----|----------------|
| TGATGACGCACGGAATGACGACGA  | 0   | 16 | RDR2-sensitive |
| TGATGACGCGCGGAACGACGACGA  | 0   | 9  | RDR2-sensitive |
| TGATGACGCGCGGAATGACGACAA  | 0   | 15 | RDR2-sensitive |
| TGATGACGGATATCAATGTGCTTG  | 14  | 0  | RDR2-resistant |
| TGATGACTAGGCAGTGGACAACGC  | 0   | 9  | RDR2-sensitive |
| TGATGACTTATGGAACAGAAACGA  | 0   | 11 | RDR2-sensitive |
| TGATGATCGTTCTTTTTGGCCAAC  | 113 | 28 | RDR2-resistant |
| TGATGATGGATGTACAATAGGAAC  | 106 | 10 | RDR2-resistant |
| TGATGATGGTAGAGAATTGTTTCA  | 37  | 2  | RDR2-resistant |
| TGATGATTTTAGTAGATATGGGTA  | 171 | 4  | RDR2-resistant |
| TGATGCAAGTAAACGAGACATTAG  | 18  | 0  | RDR2-resistant |
| TGATGCGGCTGAACCGGATGACAC  | 0   | 22 | RDR2-sensitive |
| TGATGCGGCTGAACTGGATGACGT  | 0   | 21 | RDR2-sensitive |
| TGATGCTCGACGAACGGACGGCTT  | 0   | 9  | RDR2-sensitive |
| TGATGCTTTTGAGTAGGACGACGT  | 0   | 9  | RDR2-sensitive |
| TGATGCTTTTGACAGGACGACGC   | 0   | 17 | RDR2-sensitive |
| TGATGCTTTTGGGTAGGACGACGT  | 0   | 23 | RDR2-sensitive |
| TGATGCTTTTGGGTAGGACGGCGT  | 0   | 9  | RDR2-sensitive |
| TGATGCTTTTGGGTAGGATGACGT  | 0   | 12 | RDR2-sensitive |
| TGATGCTTTTGTGTAGGACGACAT  | 1   | 47 | RDR2-sensitive |
| TGATGGAAGAAGGGCGAGAGACAC  | 0   | 22 | RDR2-sensitive |
| TGATGGAAGAAGGGCGGGAGACAC  | 1   | 18 | RDR2-sensitive |
| TGATGGACACGACCGGACGTGCGT  | 0   | 16 | RDR2-sensitive |
| TGATGGACCGGTCTGAAGCATGGA  | 0   | 16 | RDR2-sensitive |
| TGATGGACTGGCCCGAAACACGGA  | 0   | 21 | RDR2-sensitive |
| TGATGGACTGTTTGGTAGGGTTGA  | 26  | 2  | RDR2-resistant |
| TGATGGATAAGTTAGGAGCACGAT  | 23  | 2  | RDR2-resistant |
| TGATGGCAGAGCGACTTTGGGCGT  | 0   | 14 | RDR2-sensitive |
| TGATGGCTATAAACAGAACTGGC   | 14  | 0  | RDR2-resistant |
| TGATGGGAACATGTGGACGTGAT   | 0   | 19 | RDR2-sensitive |
| TGATGGGCGGTACGGTATGGAAAT  | 18  | 0  | RDR2-resistant |
| TGATGGGCTGACCCGAAGCACGGC  | 0   | 11 | RDR2-sensitive |
| TGATGGGTGCGCCCGAATCACGGA  | 0   | 26 | RDR2-sensitive |
| TGATGGTACTCTGCCTGTTGACGC  | 4   | 53 | RDR2-sensitive |
| TGATGGTCGTAGAGTAGCGTCGGC  | 0   | 9  | RDR2-sensitive |
| TGATGGTGACCTCGACAAGCAGCT  | 79  | 3  | RDR2-resistant |
| TGATGGTTTGCCGGACAACAGCGG  | 0   | 13 | RDR2-sensitive |
| TGATGTAATAAGTTAGTTCTCGAG  | 26  | 0  | RDR2-resistant |
| TGATGTCAAGTTACTGCGGTATTC  | 54  | 4  | RDR2-resistant |
| TGATGTGCGGGAGGGTCAAGGAG   | 15  | 0  | RDR2-resistant |
| TGATGTGGAACCTCGCGATAGACGA | 0   | 11 | RDR2-sensitive |
| TGATGTGGACGCCAGGCATTGAC   | 0   | 15 | RDR2-sensitive |
| TGATGTGGTTGTGTGGAGGAGGTG  | 34  | 5  | RDR2-resistant |
| TGATGTGGTTTATTATAGTTGGAT  | 21  | 2  | RDR2-resistant |
| TGATGTTAACTTTGTGATGTGGAC  | 24  | 2  | RDR2-resistant |
| TGATGTTCTTATGCGGATGATGAA  | 21  | 1  | RDR2-resistant |
| TGATGTTCTTGTGTGGATGATGGA  | 14  | 0  | RDR2-resistant |
| TGATGTTCTTGTGTGGATGATGGG  | 15  | 0  | RDR2-resistant |
| TGATGTTGACGAGTACTGAGTCTA  | 136 | 19 | RDR2-resistant |

|                           |     |     |                |
|---------------------------|-----|-----|----------------|
| TGATGTTGATTGATGAGATGGTG   | 25  | 4   | RDR2-resistant |
| TGATTAGACTTACTGATTGTTGGC  | 4   | 21  | RDR2-sensitive |
| TGATTCACGCAGGGACGGTAGAGC  | 1   | 19  | RDR2-sensitive |
| TGATTCAGCGTCGGCTTGCCATC   | 96  | 0   | RDR2-resistant |
| TGATTCGGCTGAACCGGATGGCAC  | 0   | 10  | RDR2-sensitive |
| TGATTCGGTACGGCTCGTTTACAT  | 0   | 11  | RDR2-sensitive |
| TGATTGAGGATAGTGAAGTCGGTT  | 29  | 0   | RDR2-resistant |
| TGATTGCAGAGCTCGCCAGACGAC  | 0   | 17  | RDR2-sensitive |
| TGATTGGACTTTCATGCTGGGACA  | 16  | 0   | RDR2-resistant |
| TGATTGGATCAAGAAATGCATGGC  | 21  | 0   | RDR2-resistant |
| TGATTGGATCGTAGGGGAGCGGTT  | 0   | 11  | RDR2-sensitive |
| TGATTGGGATGAAGCAGAGCACGC  | 0   | 9   | RDR2-sensitive |
| TGATTGGGTCGTATTGTGAGGCGT  | 1   | 102 | RDR2-sensitive |
| TGATTGGTCGGTCCGAAGCACGGA  | 0   | 18  | RDR2-sensitive |
| TGATTGGTCTGCACGCTCCGGTAT  | 0   | 15  | RDR2-sensitive |
| TGATTGGTTGCCGGATAAGCAGAA  | 0   | 75  | RDR2-sensitive |
| TGATTGTATCGACTATGTACGGCT  | 0   | 17  | RDR2-sensitive |
| TGATTGTATGTATCTTGTGGCATA  | 17  | 0   | RDR2-resistant |
| TGATTGTGTGTCGTCGGTTTTGCA  | 111 | 0   | RDR2-resistant |
| TGATTGTTTTGGCTTGCTTCAGAT  | 45  | 0   | RDR2-resistant |
| TGATTTAATCGGGCCAAGGCACAA  | 0   | 13  | RDR2-sensitive |
| TGATTTAATTAATGGATCGACGG   | 3   | 23  | RDR2-sensitive |
| TGATTTCTTTCCGGCACTCGGCAA  | 0   | 31  | RDR2-sensitive |
| TGATTTGCGGTTCTTGACGGTAT   | 0   | 27  | RDR2-sensitive |
| TGATTTTTTTAGAAACAGGACGCT  | 20  | 0   | RDR2-resistant |
| TGCAAACTGTAGCTGTATGGCCGC  | 0   | 14  | RDR2-sensitive |
| TGCAACCAAAGACTCGTGAGGCGT  | 0   | 13  | RDR2-sensitive |
| TGCAACCGGAAGTACGCTGGGATGA | 1   | 25  | RDR2-sensitive |
| TGCAACGGACCAGCTGAAGGGTGA  | 0   | 13  | RDR2-sensitive |
| TGCAACTCTGACAAGATAAGAGGA  | 26  | 0   | RDR2-resistant |
| TGCAACTTGTATACTTTAGAGGCT  | 257 | 1   | RDR2-resistant |
| TGCAAGACATGAACCGGACGTCAA  | 0   | 15  | RDR2-sensitive |
| TGCAAGCAAGTAGTGTTGAATAAC  | 14  | 0   | RDR2-resistant |
| TGCAAGCATTAGGTCGTTTCTGAG  | 0   | 11  | RDR2-sensitive |
| TGCAAGCTTTATGGTTCGATTGGA  | 94  | 0   | RDR2-resistant |
| TGCAAGGCATGAACCGGACGTCAA  | 0   | 13  | RDR2-sensitive |
| TGCAAGGCTCACGAGCTGGAACGA  | 0   | 12  | RDR2-sensitive |
| TGCAAGGCTGTACAGGCAAGCTGC  | 0   | 23  | RDR2-sensitive |
| TGCAAGTGTAGCTCTGCGGACGGT  | 0   | 23  | RDR2-sensitive |
| TGCAAGTTGTACGTAGACATGGTA  | 18  | 1   | RDR2-resistant |
| TGCAATCCGGCTGCGGCTGCGGCT  | 0   | 18  | RDR2-sensitive |
| TGCAATGACAGGACGGGACGGGAC  | 0   | 24  | RDR2-sensitive |
| TGCAATGACAGGACGGGACGGGAT  | 0   | 33  | RDR2-sensitive |
| TGCAATGACAGGACGGGATGAGAT  | 0   | 10  | RDR2-sensitive |
| TGCAATGACAGGACGGGATGGGAC  | 0   | 32  | RDR2-sensitive |
| TGCAATGACAGGACGGGATGGGAT  | 1   | 70  | RDR2-sensitive |
| TGCAATGATAGGACGGGACGGGAT  | 0   | 12  | RDR2-sensitive |
| TGCAATTCTCTGTCAGGGTCCGGA  | 32  | 4   | RDR2-resistant |
| TGCAATTTATCGGGCACTCGGCAA  | 0   | 30  | RDR2-sensitive |



|                           |     |    |                |
|---------------------------|-----|----|----------------|
| TGCACAGCGGAGCACACTATTCAT  | 0   | 9  | RDR2-sensitive |
| TGCACAGGACTCACGTAGGAGGAA  | 0   | 16 | RDR2-sensitive |
| TGCACAGGCTGCAGCAGGCTACAG  | 3   | 31 | RDR2-sensitive |
| TGCACAGGCTGTAGCAGGCTATAG  | 0   | 33 | RDR2-sensitive |
| TGCACCAGCCGGTCATGCTCTACG  | 21  | 0  | RDR2-resistant |
| TGCACCAGGGAAGCTCCAAGCTGAA | 0   | 13 | RDR2-sensitive |
| TGCACCAGGGAAGCTCGAAGCTGAA | 0   | 10 | RDR2-sensitive |
| TGCACCAGGGGACCTCGCGCAGAA  | 0   | 24 | RDR2-sensitive |
| TGCACCAGGGGACTCCAAGCTGAA  | 0   | 17 | RDR2-sensitive |
| TGCACCAGGGGACTTCACGCTGAA  | 0   | 13 | RDR2-sensitive |
| TGCACCATCGCAGGACTGACCGGC  | 312 | 0  | RDR2-resistant |
| TGCACCATCTCGGACCGTCCGGAC  | 0   | 9  | RDR2-sensitive |
| TGCACCCACGGACAGAAAGGCTAC  | 0   | 12 | RDR2-sensitive |
| TGCACCGTTCGCTGAGGCATGGCAA | 0   | 29 | RDR2-sensitive |
| TGCACCGTTCGTCGAGGCATGGCAA | 0   | 14 | RDR2-sensitive |
| TGCACCTCTGCGGTCCGGACGAAG  | 2   | 49 | RDR2-sensitive |
| TGCACCTGAACAGCATAGGGCCTT  | 0   | 10 | RDR2-sensitive |
| TGCACCTGTAGAGATGGAAACCAA  | 0   | 35 | RDR2-sensitive |
| TGCACGACTAACAGACTCACGGGC  | 0   | 9  | RDR2-sensitive |
| TGCACGAGACGAGTCTGCATCTAT  | 0   | 15 | RDR2-sensitive |
| TGCACGAGAGTGGGTAGACGACGT  | 2   | 26 | RDR2-sensitive |
| TGCACGATCTGGGCACAGGAGCGA  | 0   | 11 | RDR2-sensitive |
| TGCACGCACAGAACCGAGCTCCAA  | 0   | 17 | RDR2-sensitive |
| TGCACGCACGTCGGCTCTCACGGT  | 0   | 11 | RDR2-sensitive |
| TGCACGGCAGGGTAGAGAAGCGAC  | 0   | 10 | RDR2-sensitive |
| TGCACTAGAGTAGATATCATTTTT  | 30  | 4  | RDR2-resistant |
| TGCACTAGATGTAGAGATGTTGAT  | 17  | 1  | RDR2-resistant |
| TGCACTGACCCCACTGACGGACT   | 28  | 5  | RDR2-resistant |
| TGCACTGGAAGATACATGCACCGT  | 0   | 9  | RDR2-sensitive |
| TGCACTGGACTCAGCATGAGACGT  | 0   | 12 | RDR2-sensitive |
| TGCACTGTAGCGACGGTGGTTCGAT | 0   | 9  | RDR2-sensitive |
| TGCACTGTGGAAGATTGCAGGAAC  | 0   | 11 | RDR2-sensitive |
| TGCACTTCGGGCTGTCACGGCATG  | 0   | 12 | RDR2-sensitive |
| TGCACTTGACGGTGTCACTACCT   | 74  | 0  | RDR2-resistant |
| TGCAGAAATGTTTCGGATGCAAGCT | 22  | 0  | RDR2-resistant |
| TGCAGAAGGCTGCGATGAACCGGC  | 0   | 16 | RDR2-sensitive |
| TGCAGACGAGTAGATGGCGGACAA  | 0   | 15 | RDR2-sensitive |
| TGCAGACTAGTGGACACTCGGCAA  | 0   | 9  | RDR2-sensitive |
| TGCAGACTGCAGACACGTCCACAC  | 1   | 42 | RDR2-sensitive |
| TGCAGACTGCATACACGTCCACAC  | 0   | 15 | RDR2-sensitive |
| TGCAGAGACGGACGGGAACGGCAA  | 0   | 11 | RDR2-sensitive |
| TGCAGAGCGGCAAGCTAGAGCGAC  | 156 | 56 | RDR2-resistant |
| TGCAGAGCGGCAAGTTAGAGCGAC  | 0   | 14 | RDR2-sensitive |
| TGCAGAGCGGTATCTGTGCAGCAC  | 0   | 16 | RDR2-sensitive |
| TGCAGAGGACTACATGTTTCTCAG  | 21  | 0  | RDR2-resistant |
| TGCAGAGTGAACGGAACAGAGCGT  | 1   | 23 | RDR2-sensitive |
| TGCAGAGTGAACGGAACGGAGCGT  | 11  | 80 | RDR2-sensitive |
| TGCAGAGTGGACAGTTGACGCCGG  | 1   | 49 | RDR2-sensitive |
| TGCAGATCGCGACAGTGGAGGCAT  | 0   | 15 | RDR2-sensitive |

|                          |    |    |                |
|--------------------------|----|----|----------------|
| TGCAGATGTAGAGCACAAGGACGG | 0  | 24 | RDR2-sensitive |
| TGCAGCCTGTACTGGAGCAGCA   | 0  | 18 | RDR2-sensitive |
| TGCAGCCTGTGCACTGGAGCAGCA | 0  | 55 | RDR2-sensitive |
| TGCAGCCTGTGTACTGGAGCAGCA | 0  | 10 | RDR2-sensitive |
| TGCAGCGACGTACTCGGCACCGAA | 0  | 14 | RDR2-sensitive |
| TGCAGCGGCAAGCCCTACGGACAA | 0  | 12 | RDR2-sensitive |
| TGCAGCGGCTTGGACTTGGACGGA | 0  | 14 | RDR2-sensitive |
| TGCAGCGGTTCACTGGAAAGACGA | 0  | 10 | RDR2-sensitive |
| TGCAGCTAGACGCGTAAGGACCAT | 1  | 17 | RDR2-sensitive |
| TGCAGCTGTGGCGCGCGATGAAT  | 0  | 9  | RDR2-sensitive |
| TGCAGGAAGATGTACGCTGTGCAG | 0  | 15 | RDR2-sensitive |
| TGCAGGACAATACGGGGACGACAG | 0  | 12 | RDR2-sensitive |
| TGCAGGACACATGTAGGTGGTCGT | 0  | 35 | RDR2-sensitive |
| TGCAGGACATATGTAGGTGGTCGT | 0  | 11 | RDR2-sensitive |
| TGCAGGATCCTGACGAGTCGACGA | 0  | 15 | RDR2-sensitive |
| TGCAGGATCTCGAAGGCAACGGAT | 0  | 9  | RDR2-sensitive |
| TGCAGGATGGCAGAACGGCAGAAC | 0  | 16 | RDR2-sensitive |
| TGCAGGATTTGCTGGTCGCTGGAT | 0  | 15 | RDR2-sensitive |
| TGCAGGCCGGTGATGTAGAGTGCA | 17 | 0  | RDR2-resistant |
| TGCAGGCTTGCAGCTCTTCAGCAC | 0  | 13 | RDR2-sensitive |
| TGCAGGTGTGCACTGTAGCGACGG | 0  | 17 | RDR2-sensitive |
| TGCAGGTTCCGACTGGACCGGCAT | 0  | 24 | RDR2-sensitive |
| TGCAGTACGTCAGAGGAACCGGCT | 0  | 34 | RDR2-sensitive |
| TGCAGTCCCTCGAACGGTCGCCGG | 5  | 33 | RDR2-sensitive |
| TGCAGTCGACAGCCAAGAATCCAG | 0  | 15 | RDR2-sensitive |
| TGCAGTCGTAAACGGTGACACAT  | 0  | 13 | RDR2-sensitive |
| TGCAGTCTAATGTAGAAAGGGCTC | 0  | 12 | RDR2-sensitive |
| TGCAGTCTCTCGAACGGTCGTCAT | 0  | 27 | RDR2-sensitive |
| TGCAGTACTAAGTATATTGAATT  | 54 | 1  | RDR2-resistant |
| TGCAGTTCAGGAGATGTGGGGCAC | 0  | 10 | RDR2-sensitive |
| TGCAGTTGGGCATCCATGTGTAGT | 0  | 14 | RDR2-sensitive |
| TGCATAAATTTTAGTATCGCCGGG | 24 | 1  | RDR2-resistant |
| TGCATAACTTTCTCTGTAGCAGC  | 17 | 1  | RDR2-resistant |
| TGCATAGAATCGGACTGTGCCGGA | 0  | 14 | RDR2-sensitive |
| TGCATATCTGTGCTTGACTCCGGC | 39 | 0  | RDR2-resistant |
| TGCATATGTTGCAGGTTGTCGTT  | 37 | 0  | RDR2-resistant |
| TGCATATTTCACTCGATCTGTCGT | 0  | 12 | RDR2-sensitive |
| TGCATCGACTGCGTACGACTACAT | 3  | 35 | RDR2-sensitive |
| TGCATCGGACTGTCCGGTATGCAC | 0  | 9  | RDR2-sensitive |
| TGCATCGGGCTGTGCCGGTTCGGG | 0  | 11 | RDR2-sensitive |
| TGCATGAGTAGAGCCGGGATGCAT | 0  | 12 | RDR2-sensitive |
| TGCATGATTGTACCGGGCCGGCAT | 0  | 18 | RDR2-sensitive |
| TGCATGCACGGACGCAGCCTAGTT | 0  | 11 | RDR2-sensitive |
| TGCATGCAGACTGGGACCGGCTAC | 0  | 14 | RDR2-sensitive |
| TGCATGCATAAGTATCTGGATGAC | 25 | 0  | RDR2-resistant |
| TGCATGCATAGAGTCTGGCCACAT | 1  | 17 | RDR2-sensitive |
| TGCATGCGACGGCTGGTTGAGGCT | 0  | 18 | RDR2-sensitive |
| TGCATGCGGAGAGAAGCGAGACGC | 0  | 10 | RDR2-sensitive |
| TGCATGCGGAGTGGGATGGGGAGT | 0  | 16 | RDR2-sensitive |

|                           |     |    |                |
|---------------------------|-----|----|----------------|
| TGCATGCGGCTGATGAGCATGATC  | 44  | 6  | RDR2-resistant |
| TGCATGCGTCGCTGTGTTCCGGCAA | 0   | 13 | RDR2-sensitive |
| TGCATGGACCCACGAAGGACGCGC  | 0   | 11 | RDR2-sensitive |
| TGCATGGTAGGGAGGCGGGGCAAA  | 16  | 0  | RDR2-resistant |
| TGCATGGTGCTGGACGGTTGACAT  | 0   | 18 | RDR2-sensitive |
| TGCATGTCTGACCAGGGCAATAC   | 15  | 0  | RDR2-resistant |
| TGCATGTCTAGAGGTAGAGGAGTA  | 65  | 15 | RDR2-resistant |
| TGCATGTTGACGGTGGTCCAGAAC  | 124 | 0  | RDR2-resistant |
| TGCATGTTTACTGAGTTAGGCAT   | 0   | 9  | RDR2-sensitive |
| TGCATTGACTGTGTACACTACAT   | 0   | 11 | RDR2-sensitive |
| TGCATTGATCGGGCCGGGACGGAC  | 0   | 18 | RDR2-sensitive |
| TGCATTGGGTACTGTAGGACGGCT  | 0   | 17 | RDR2-sensitive |
| TGCATTGGTGTTGAATTCGGCGTT  | 25  | 1  | RDR2-resistant |
| TGCATTGTAGACCGCGGTGTTCCGC | 0   | 12 | RDR2-sensitive |
| TGCATTGTAGTTTTGGACGAGCGG  | 15  | 0  | RDR2-resistant |
| TGCATTTTATCGGGCACTCGGCAA  | 0   | 15 | RDR2-sensitive |
| TGCCAAAAGTGGATGTAGGGACGT  | 1   | 85 | RDR2-sensitive |
| TGCCAACTGTGGTAGAAGATGAAC  | 1   | 16 | RDR2-sensitive |
| TGCCAAGACTGACGCGTTTCTCGA  | 0   | 11 | RDR2-sensitive |
| TGCCAATGTCAGACTATTCGGTGT  | 0   | 10 | RDR2-sensitive |
| TGCCACACCTTGGCTTGTGCGGAC  | 101 | 14 | RDR2-resistant |
| TGCCACATAGTAGACTCGGCAA    | 1   | 40 | RDR2-sensitive |
| TGCCACGCGGGACTGCCACGTCAC  | 0   | 9  | RDR2-sensitive |
| TGCCACGGCAGAGCTCGGCACCAT  | 0   | 15 | RDR2-sensitive |
| TGCCACGGTGAAGAAGCTGGTGC   | 14  | 0  | RDR2-resistant |
| TGCCACGTCACGAAGCTCGGCGCC  | 0   | 9  | RDR2-sensitive |
| TGCCACGTCAGGAAGCTCGGCGCC  | 1   | 22 | RDR2-sensitive |
| TGCCACTCATTGATCTTCGGGGGA  | 31  | 0  | RDR2-resistant |
| TGCCACTCTGGGCCAGCGAAACGA  | 0   | 12 | RDR2-sensitive |
| TGCCACTGTATGGAAGAATTTGGT  | 21  | 0  | RDR2-resistant |
| TGCCAGACCGCATACTCGAAGCAG  | 0   | 10 | RDR2-sensitive |
| TGCCAGATCGCGGGCACTCGGCAA  | 3   | 26 | RDR2-sensitive |
| TGCCAGATCGCGGGTACTCGGCAA  | 0   | 12 | RDR2-sensitive |
| TGCCAGATTGGTGGGTCGGAACGA  | 0   | 12 | RDR2-sensitive |
| TGCCAGCACGACACGGAAGTGCAT  | 0   | 10 | RDR2-sensitive |
| TGCCAGCGCAGTAGATATCTCGGT  | 0   | 18 | RDR2-sensitive |
| TGCCAGCGCTGTAGGTACCTCGGC  | 0   | 20 | RDR2-sensitive |
| TGCCAGCTAGACTCGTACCTCGAC  | 0   | 10 | RDR2-sensitive |
| TGCCAGTCGGTACTCGGCAAAGAA  | 0   | 26 | RDR2-sensitive |
| TGCCATATGTTAGCTGGACGTCGC  | 0   | 15 | RDR2-sensitive |
| TGCCATCGTGCAGGACAAGGGCAG  | 0   | 11 | RDR2-sensitive |
| TGCCACCGTAGATCATGAAGCAG   | 0   | 10 | RDR2-sensitive |
| TGCCCAGTCATCGGCCACGGCAC   | 0   | 22 | RDR2-sensitive |
| TGCCCATGGGGTGACGCCGAAAG   | 119 | 0  | RDR2-resistant |
| TGCCCCACAATCGCACGGACGCAC  | 0   | 18 | RDR2-sensitive |
| TGCCCCACAATCGCGCGGACGCAC  | 0   | 12 | RDR2-sensitive |
| TGCCCCGTTGGCCTGTTTGGGTAA  | 0   | 22 | RDR2-sensitive |
| TGCCCCTCTGATGGAGTATCGGGA  | 34  | 1  | RDR2-resistant |
| TGCCCGACAAAAAGCACTCGGCAA  | 1   | 20 | RDR2-sensitive |

|                            |    |     |                |
|----------------------------|----|-----|----------------|
| TGCCCGACAAAAAGTACTCGGCAA   | 0  | 14  | RDR2-sensitive |
| TGCCCGACAAAAGACACTCGGCAA   | 1  | 24  | RDR2-sensitive |
| TGCCCGACAAAAGGCACTCGGCAA   | 2  | 38  | RDR2-sensitive |
| TGCCCGCGATCTGGCACTCGGCAA   | 3  | 16  | RDR2-sensitive |
| TGCCCTACTGTAGACGGTCAGTGT   | 0  | 24  | RDR2-sensitive |
| TGCCCTATGGACGAGCTCCGGCAT   | 0  | 13  | RDR2-sensitive |
| TGCCCTCCCCATGAATCGTCAAT    | 58 | 0   | RDR2-resistant |
| TGCCCTCTACGACGGCACGGACGG   | 0  | 18  | RDR2-sensitive |
| TGCCCTCTGACGGGAAGTCCGGTAA  | 0  | 54  | RDR2-sensitive |
| TGCCCTCTGAGTATCGGACGTGTG   | 0  | 9   | RDR2-sensitive |
| TGCCCTCTGCACAGGGACGGACGG   | 0  | 47  | RDR2-sensitive |
| TGCCCTCTGCACAGGGGCGGACGG   | 4  | 36  | RDR2-sensitive |
| TGCCCTCTGGTCAGGCACGGACGG   | 3  | 16  | RDR2-sensitive |
| TGCCCTCTGGTCAGGCGCGGACGG   | 0  | 21  | RDR2-sensitive |
| TGCCCTCTGTAAGCTGAATGCGTC   | 0  | 51  | RDR2-sensitive |
| TGCCCTTAAAGGCGTGA CT CGGGC | 0  | 21  | RDR2-sensitive |
| TGCCGAACAACCCGGTGAGGTCGG   | 0  | 18  | RDR2-sensitive |
| TGCCGACACGTCGGTGTCTCGGA    | 0  | 9   | RDR2-sensitive |
| TGCCGACACTAGACACACAGACGT   | 0  | 11  | RDR2-sensitive |
| TGCCGACCGTTGCAGATCTGGCGC   | 3  | 30  | RDR2-sensitive |
| TGCCGACGAGAGCCAGGACGGTGT   | 0  | 10  | RDR2-sensitive |
| TGCCGACTGCAGGAGACAAGTCAT   | 1  | 16  | RDR2-sensitive |
| TGCCGAGTACTTCGGACAGTCGGT   | 0  | 22  | RDR2-sensitive |
| TGCCGATTGTCCGACAAAATGCAT   | 0  | 15  | RDR2-sensitive |
| TGCCGCGACTTGCAACTTCGACGG   | 0  | 10  | RDR2-sensitive |
| TGCCGCGACTTGCACTGACGGTTT   | 0  | 9   | RDR2-sensitive |
| TGCCGCGACTTGCGACTTCGACGG   | 9  | 27  | RDR2-sensitive |
| TGCCGCGGACCTGGCTCGCTCGGC   | 1  | 23  | RDR2-sensitive |
| TGCCGCGGATGAAAGGTTGCGCAT   | 0  | 23  | RDR2-sensitive |
| TGCCGCTCGGATCATCGTCGTCGT   | 0  | 10  | RDR2-sensitive |
| TGCCGCTGTAGACAGAAGATGGGC   | 0  | 9   | RDR2-sensitive |
| TGCCGCTGTAGATTAGACGGTGAT   | 0  | 28  | RDR2-sensitive |
| TGCCGGAACGAGCTCGACTCGGCT   | 0  | 10  | RDR2-sensitive |
| TGCCGGAACGCCTAGATCGGAGGA   | 0  | 10  | RDR2-sensitive |
| TGCCGGAATCGGAAACGGGAACGA   | 0  | 10  | RDR2-sensitive |
| TGCCGGAATTGGACGGGGACGGAC   | 0  | 12  | RDR2-sensitive |
| TGCCGACCGGAGAACGACGGCGT    | 0  | 9   | RDR2-sensitive |
| TGCCGATAAGCAGAACCAGGCTA    | 0  | 34  | RDR2-sensitive |
| TGCCGATAAGCAGAACCAGGCTC    | 1  | 157 | RDR2-sensitive |
| TGCCGATAAGCAGAACCAGGCTT    | 0  | 53  | RDR2-sensitive |
| TGCCGATTGGTGGGTCGAAACGA    | 0  | 10  | RDR2-sensitive |
| TGCCGGGCTGGAGGCACGACAGGC   | 0  | 25  | RDR2-sensitive |
| TGCCGGGCTGGAGGCATGGCGGGC   | 0  | 9   | RDR2-sensitive |
| TGCCGGGTCACGGGCTAAACGGGC   | 0  | 9   | RDR2-sensitive |
| TGCCGTACCGGACTGCACACGCGC   | 0  | 15  | RDR2-sensitive |
| TGCCGTCGCGGCTGGGAAGGCGAA   | 0  | 9   | RDR2-sensitive |
| TGCCGTGTCGGCACTAGGCGTCGT   | 0  | 9   | RDR2-sensitive |
| TGCCTAACTGTGACTGTGGCAGAC   | 0  | 22  | RDR2-sensitive |
| TGCCTAGGCTGTAGCCCCGGTCAC   | 0  | 24  | RDR2-sensitive |

|                            |     |      |                |
|----------------------------|-----|------|----------------|
| TGCCTATCGTCAGATCGGATCGGT   | 0   | 12   | RDR2-sensitive |
| TGCCTATGCGTTGCGACGGCTCAC   | 0   | 16   | RDR2-sensitive |
| TGCCTCATTAGCTGGCAGTCGGTC   | 71  | 6    | RDR2-resistant |
| TGCCTCCAAGGCGTGACTIONCGGCA | 0   | 9    | RDR2-sensitive |
| TGCCTCCGAATTGTGATCGCGCGG   | 1   | 17   | RDR2-sensitive |
| TGCCTCGGGCTGTGCGCGTTTCGA   | 0   | 9    | RDR2-sensitive |
| TGCCTCTACTGTAAGAAGACAGGT   | 1   | 17   | RDR2-sensitive |
| TGCCTCTTCAGGTCTTCGTTGGAT   | 36  | 5    | RDR2-resistant |
| TGCCTGAAGCACTCGGCAAAGCCT   | 0   | 10   | RDR2-sensitive |
| TGCCTGATGGGCTCCCGACGGTTT   | 0   | 12   | RDR2-sensitive |
| TGCCTGCTTGGACGAACCGCGGAA   | 0   | 15   | RDR2-sensitive |
| TGCCTGGCCTGGCACTATTCGGAC   | 0   | 11   | RDR2-sensitive |
| TGCCTGTAGAGCGTGTGCGGCGAGC  | 0   | 16   | RDR2-sensitive |
| TGCCTGTGGGAGCACGAGTCTGGC   | 0   | 9    | RDR2-sensitive |
| TGCCTTACGAGCCGGACGGTCCAC   | 0   | 13   | RDR2-sensitive |
| TGCCTTCAAATTGTGATCGCGCGG   | 0   | 20   | RDR2-sensitive |
| TGCCTTCGCCCCTGTAGCACGGAT   | 41  | 5    | RDR2-resistant |
| TGCCTTCTCGGTTCTGTGGCGGC    | 0   | 11   | RDR2-sensitive |
| TGCCTTCTGCACAGGGGCGGACGG   | 5   | 109  | RDR2-sensitive |
| TGCCTTGCTGTTTCGTCGAGACGAC  | 18  | 0    | RDR2-resistant |
| TGCCTTGTCGTGCTGTTTATCGGT   | 101 | 15   | RDR2-resistant |
| TGCCTTGTCGTTGGTGGATCCGGT   | 0   | 9    | RDR2-sensitive |
| TGCCTTTCTAGCTCATATGGTCCG   | 43  | 5    | RDR2-resistant |
| TGCCTTTGTAGATCCGAGCGGCCA   | 0   | 14   | RDR2-sensitive |
| TGCCTTTTATCGGCACTCGGCAA    | 0   | 19   | RDR2-sensitive |
| TGCCTTTTCCACGGCGAAGACTGC   | 0   | 9    | RDR2-sensitive |
| TGCCTTTTCTCGGGCACTCGGCAA   | 2   | 33   | RDR2-sensitive |
| TGCCTTTTGTGCGGCACTCGGCAA   | 10  | 56   | RDR2-sensitive |
| TGCCTTTTGTGCGGGCACTCGGCAA  | 110 | 1649 | RDR2-sensitive |
| TGCCTTTTGTGCGGGCACTCGGCAC  | 8   | 105  | RDR2-sensitive |
| TGCCTTTTGTGCGGGCACTCGGCAT  | 6   | 73   | RDR2-sensitive |
| TGCCTTTTGTGCGGGCACTCGGCCA  | 6   | 60   | RDR2-sensitive |
| TGCCTTTTGTGCGGGCACTCGGTAA  | 0   | 34   | RDR2-sensitive |
| TGCCTTTTGTGCGGGCACTCGGCAA  | 4   | 75   | RDR2-sensitive |
| TGCGAACCATGTACGTGCCAGGAT   | 2   | 20   | RDR2-sensitive |
| TGCGAACTCGGCTGCAAAAGACAA   | 0   | 9    | RDR2-sensitive |
| TGCGAAGAAGACGACACTCTGCGC   | 0   | 11   | RDR2-sensitive |
| TGCGAAGAAGACGACCCTCTGCAC   | 0   | 9    | RDR2-sensitive |
| TGCGAAGAAGACGACTCTCTGCAC   | 0   | 11   | RDR2-sensitive |
| TGCGAAGACGTAAGAGCCAGGCGC   | 0   | 9    | RDR2-sensitive |
| TGCGAAGACTGCAGAGTGGAAGCA   | 0   | 12   | RDR2-sensitive |
| TGCGACACACGCGGATGAACGCAC   | 0   | 18   | RDR2-sensitive |
| TGCGACACGGGCTCCGACGGGAAC   | 0   | 10   | RDR2-sensitive |
| TGCGACATACTGTTTTAGACGAT    | 33  | 0    | RDR2-resistant |
| TGCGACCAGGAGGACACTCGGCAA   | 0   | 19   | RDR2-sensitive |
| TGCGACCCTGTAGCAATGACGCGC   | 0   | 15   | RDR2-sensitive |
| TGCGACGACGGCGTGCATGGACTC   | 0   | 9    | RDR2-sensitive |
| TGCGACGAGGACGATTGGCGCCAA   | 42  | 0    | RDR2-resistant |
| TGCGACGGCTCACAACAATACCCA   | 0   | 18   | RDR2-sensitive |

|                           |    |    |                |
|---------------------------|----|----|----------------|
| TGCGACTAGGAAGATGCTGCCCGC  | 0  | 15 | RDR2-sensitive |
| TGCGACTGAACCAGATGACACCGT  | 0  | 15 | RDR2-sensitive |
| TGCGACTGAGTCTGCGACGGTGAT  | 0  | 9  | RDR2-sensitive |
| TGCGACTGGAGTAGAGACCGGTGT  | 0  | 18 | RDR2-sensitive |
| TGCGACTGGATCGACAGCGAGCGG  | 0  | 23 | RDR2-sensitive |
| TGCGACTGGCAGGACGTTGGGCTG  | 34 | 1  | RDR2-resistant |
| TGCGACTGTTTCAGTGACCGCGGTT | 57 | 13 | RDR2-resistant |
| TGCGACTTCAGTAGACGCGGCCTC  | 0  | 9  | RDR2-sensitive |
| TGCGACTTGGGCACTTAAGCTGGA  | 30 | 5  | RDR2-resistant |
| TGCGAGACAGTGTACAACGGAGAT  | 0  | 15 | RDR2-sensitive |
| TGCGAGACTGGACCGGCCGACAC   | 1  | 67 | RDR2-sensitive |
| TGCGAGATGTGGACTGCGCGGC    | 0  | 10 | RDR2-sensitive |
| TGCGAGCACGACGAGGGTAGACAC  | 0  | 48 | RDR2-sensitive |
| TGCGAGGACGTGAAGGACGCCGGC  | 0  | 10 | RDR2-sensitive |
| TGCGAGGACTAGACCAAAGAGGAT  | 0  | 25 | RDR2-sensitive |
| TGCGATGCAGAACTGATTGGCGAC  | 0  | 16 | RDR2-sensitive |
| TGCGATGCTGCTGTGGATCGGGAT  | 1  | 14 | RDR2-sensitive |
| TGCGATGCTTTTGTGTAGGACGGT  | 0  | 13 | RDR2-sensitive |
| TGCGATGTAGAACAGCAGAGGCAG  | 0  | 10 | RDR2-sensitive |
| TGCGCAACACGTAGAAGGCGACGT  | 0  | 22 | RDR2-sensitive |
| TGCGCAAGGGCGGACTGTCCGCGG  | 0  | 18 | RDR2-sensitive |
| TGCGCACCTAGGCTCTCGGGAGA   | 87 | 0  | RDR2-resistant |
| TGCGCACGCATGGACTGTTCGGCT  | 0  | 13 | RDR2-sensitive |
| TGCGCACGCGCGGACTGTCCGGCC  | 0  | 9  | RDR2-sensitive |
| TGCGCACGCGTGGATTGTCCGGAC  | 0  | 9  | RDR2-sensitive |
| TGCGCAGACTGTCCGGTGCCTCAC  | 1  | 26 | RDR2-sensitive |
| TGCGCAGAGACAGTTAGGGTTCCT  | 0  | 9  | RDR2-sensitive |
| TGCGCAGCACGTAGAAGACGACGT  | 0  | 11 | RDR2-sensitive |
| TGCGCAGGACTAACGAAGGCAGAA  | 0  | 35 | RDR2-sensitive |
| TGCGCAGGGGCGGCGGAAGATCGC  | 0  | 14 | RDR2-sensitive |
| TGCGCGACTTGTCCCTACCGGCTG  | 25 | 0  | RDR2-resistant |
| TGCGCGAGACAGTGTAAAGATGGAG | 1  | 64 | RDR2-sensitive |
| TGCGCGATGAGAGGACGAAGTCGT  | 0  | 12 | RDR2-sensitive |
| TGCGCGCTCCAGCAGACTCCGCAT  | 2  | 58 | RDR2-sensitive |
| TGCGCGCTCCAGCAGGCTCCGCAT  | 0  | 15 | RDR2-sensitive |
| TGCGCGGGACTAACGGAGGCAGAA  | 0  | 13 | RDR2-sensitive |
| TGCGCGGGGATGGAATTGGACGGT  | 0  | 9  | RDR2-sensitive |
| TGCGCTATCCGGGCGAGTCGTCGG  | 0  | 32 | RDR2-sensitive |
| TGCGCTCGGCTGCAGAAAGGCTAA  | 0  | 9  | RDR2-sensitive |
| TGCGCTCTCCAGCAGGCTCCGCAT  | 0  | 10 | RDR2-sensitive |
| TGCGCTGAGCCGGACGGTCCACGT  | 0  | 11 | RDR2-sensitive |
| TGCGCTGGCACAAACGGACGTCGT  | 1  | 25 | RDR2-sensitive |
| TGCGCTGGCATGAACGGACGTCGT  | 3  | 42 | RDR2-sensitive |
| TGCGCTGGCCCAAACGGACGACGT  | 0  | 10 | RDR2-sensitive |
| TGCGCTGTTGTGCCAAGAGTCGGA  | 0  | 9  | RDR2-sensitive |
| TGCGCTTGACAGTAGGGGGTTACAA | 0  | 15 | RDR2-sensitive |
| TGCGGAAATGGGCCAAGACGATGT  | 0  | 80 | RDR2-sensitive |
| TGCGGAACTGGGCAGAGGACTCGC  | 1  | 13 | RDR2-sensitive |
| TGCGGAAGGCCAGGTAGAGCGGTT  | 0  | 9  | RDR2-sensitive |

|                           |    |     |                |
|---------------------------|----|-----|----------------|
| TGCGGAAGTCTGCGTGGACTGCAC  | 0  | 46  | RDR2-sensitive |
| TGCGGAAGTTTGGCTACTGTATTT  | 0  | 10  | RDR2-sensitive |
| TGCGGACAATTCTAGTGGCGTCAG  | 1  | 13  | RDR2-sensitive |
| TGCGGACAATTCTAGTGGCGTCGG  | 1  | 19  | RDR2-sensitive |
| TGCGGACAGTCCTACGCAGGGCAT  | 0  | 11  | RDR2-sensitive |
| TGCGGACAGTCTGAAACGTTGCGG  | 0  | 17  | RDR2-sensitive |
| TGCGGACAGTTCTGCCAAAGTGGC  | 2  | 21  | RDR2-sensitive |
| TGCGGACCATGTAGGGAAGGATGC  | 0  | 10  | RDR2-sensitive |
| TGCGGACCGAGCCAGCATCGACGT  | 0  | 41  | RDR2-sensitive |
| TGCGGACCGCGGCTGACGTTTCGCC | 28 | 3   | RDR2-resistant |
| TGCGGAGAATGTGCATGCAACGAT  | 45 | 7   | RDR2-resistant |
| TGCGGAGACGGATGCGGAAGCTGC  | 0  | 11  | RDR2-sensitive |
| TGCGGAGACGGATGCGGAGCCTGC  | 0  | 19  | RDR2-sensitive |
| TGCGGAGACGGATGCGGAGGCTGC  | 3  | 53  | RDR2-sensitive |
| TGCGGAGAGGCAGATGAATTCGGT  | 0  | 18  | RDR2-sensitive |
| TGCGGAGCAGGACGCCTTTCTGAT  | 0  | 9   | RDR2-sensitive |
| TGCGGAGCCTGCTGGAGAGCGCAA  | 1  | 90  | RDR2-sensitive |
| TGCGGAGCCTGCTGGAGCGCGCAA  | 0  | 28  | RDR2-sensitive |
| TGCGGAGGGCAGAAGTGTACGCGC  | 1  | 38  | RDR2-sensitive |
| TGCGGAGTCTAGCATACTATTCAT  | 0  | 9   | RDR2-sensitive |
| TGCGGAGTCTGCTGGAGCGCGCAA  | 0  | 45  | RDR2-sensitive |
| TGCGGAGTGACGATGATGGAGCAT  | 1  | 22  | RDR2-sensitive |
| TGCGGATATGATAACAACGTGCGT  | 0  | 9   | RDR2-sensitive |
| TGCGGATCGCGACAGTGGAGGCAT  | 1  | 52  | RDR2-sensitive |
| TGCGGATCTGGTCGAGATGTGCGA  | 33 | 2   | RDR2-resistant |
| TGCGGATGCGGAGTGGGATGGGGA  | 0  | 16  | RDR2-sensitive |
| TGCGGATGTTGTTGGACGCGGGTA  | 0  | 16  | RDR2-sensitive |
| TGCGGATTAAGTGTACGGGCAGCAC | 0  | 12  | RDR2-sensitive |
| TGCGGATTCGATGAAATAGAGGCT  | 0  | 12  | RDR2-sensitive |
| TGCGGCAACTGAAGCGGGTGGTGT  | 1  | 14  | RDR2-sensitive |
| TGCGGCACAGCAGGACGACGACGA  | 0  | 19  | RDR2-sensitive |
| TGCGGCACTCGACAAAGACGTCTT  | 0  | 11  | RDR2-sensitive |
| TGCGGCAGTGGATCCTAGGAGCAA  | 0  | 12  | RDR2-sensitive |
| TGCGGCATGTGGATCGATCGGGCA  | 0  | 13  | RDR2-sensitive |
| TGCGGCCACGGCAGAACACAGGG   | 0  | 10  | RDR2-sensitive |
| TGCGGCCACGTCACAGCTCGGCGC  | 3  | 37  | RDR2-sensitive |
| TGCGGCCTCCTAGCTCGGCGTCAT  | 1  | 25  | RDR2-sensitive |
| TGCGGCGCAGCAGGACGACGACGA  | 0  | 12  | RDR2-sensitive |
| TGCGGCGTAGGCCTAAGTGACGGC  | 0  | 9   | RDR2-sensitive |
| TGCGGCTGAACCAGATGACACCAT  | 0  | 17  | RDR2-sensitive |
| TGCGGCTGAACCGGAACGTGGCGT  | 0  | 13  | RDR2-sensitive |
| TGCGGCTGAACCGGTTGACAACAT  | 0  | 9   | RDR2-sensitive |
| TGCGGCTGAACCGGTTGGCAACAT  | 0  | 10  | RDR2-sensitive |
| TGCGGCTGAACTGGATGACGTCGT  | 1  | 125 | RDR2-sensitive |
| TGCGGCTGACAAAGAGACGGGCAA  | 0  | 9   | RDR2-sensitive |
| TGCGGCTGCGGCTTCTACAGTATT  | 13 | 245 | RDR2-sensitive |
| TGCGGCTGGAGAGAGAGTGGCGGC  | 0  | 11  | RDR2-sensitive |
| TGCGGCTGGAGCAGAGACCGGTGT  | 0  | 9   | RDR2-sensitive |
| TGCGGCTGGAGTAGAGACCGGTGT  | 2  | 54  | RDR2-sensitive |

|                           |    |     |                |
|---------------------------|----|-----|----------------|
| TGCGGGACAGCCAGGACAGGGACA  | 0  | 15  | RDR2-sensitive |
| TGCGGGACAGTCAGGACAGAGGTT  | 0  | 10  | RDR2-sensitive |
| TGCGGGAGTTTGGCTACTGTATTT  | 0  | 18  | RDR2-sensitive |
| TGCGGGCAAACGACGGTGACACAT  | 0  | 11  | RDR2-sensitive |
| TGCGGGCTGACAACGCGCGGGGGC  | 0  | 14  | RDR2-sensitive |
| TGCGGGCTGGTTGACGCGGTCTAA  | 0  | 24  | RDR2-sensitive |
| TGCGGGCTTACTCGGCGTGTTCGAC | 0  | 41  | RDR2-sensitive |
| TGCGGGTGAATTTTGGCGACAGCA  | 36 | 6   | RDR2-resistant |
| TGCGGTATTGTAAACTGCGGTATT  | 0  | 16  | RDR2-sensitive |
| TGCGGTCTGTACCGAAGGAGATGT  | 0  | 12  | RDR2-sensitive |
| TGCGGTGATGTCATCCCTGTCGGT  | 0  | 9   | RDR2-sensitive |
| TGCGGTGCTCTCTGGAAGATCGGT  | 0  | 28  | RDR2-sensitive |
| TGCGGTGCTTTTGGTAGGACGGT   | 0  | 9   | RDR2-sensitive |
| TGCGGTGCTTTTGGGTAGGACGGT  | 2  | 18  | RDR2-sensitive |
| TGCGGTGTAGTATATTTGGGGCAT  | 0  | 15  | RDR2-sensitive |
| TGCGGTTCTTGTGTAGTGATTGGC  | 0  | 9   | RDR2-sensitive |
| TGCGTACTGTCGTGGACGGCCGGC  | 0  | 10  | RDR2-sensitive |
| TGCGTCCCGGGCTTCAGATGGTTT  | 0  | 9   | RDR2-sensitive |
| TGCGTCCGACTGCGTACGACTACAT | 0  | 11  | RDR2-sensitive |
| TGCGTCCGAGATCCCCTGTTGACGG | 0  | 9   | RDR2-sensitive |
| TGCGTCTGCCAACTTTGAGGTCGG  | 0  | 10  | RDR2-sensitive |
| TGCGTGCTGAAGAACGGAGATGGC  | 0  | 9   | RDR2-sensitive |
| TGCGTGCTGTAGAAGCGTTGTGGC  | 0  | 13  | RDR2-sensitive |
| TGCGTGGAAGTGTGGTGTCCGGCGA | 0  | 10  | RDR2-sensitive |
| TGCGTGCTAGGGATTGAGGGCAG   | 2  | 20  | RDR2-sensitive |
| TGCGTGGTGCGGTGGATGCCGAGC  | 17 | 0   | RDR2-resistant |
| TGCGTTGCGACGGCTTACAACAAT  | 0  | 52  | RDR2-sensitive |
| TGCGTTGCTCGGATCTAGACGGTT  | 0  | 10  | RDR2-sensitive |
| TGCGTTGGCACAAACGGACGTCGT  | 2  | 123 | RDR2-sensitive |
| TGCGTTTCCTGTAGTGACGGCAT   | 0  | 12  | RDR2-sensitive |
| TGCGTTTCGGGCTCCGGACGGTGT  | 0  | 9   | RDR2-sensitive |
| TGCGTTTGGTGTAGAGATGGCAAT  | 0  | 12  | RDR2-sensitive |
| TGCTAAACGGCCTTCAGCGACCT   | 0  | 10  | RDR2-sensitive |
| TGCTAAAGCGACTACAGAGGACAG  | 0  | 12  | RDR2-sensitive |
| TGCTAAAGGTTAGGGACCGACGGT  | 0  | 23  | RDR2-sensitive |
| TGCTAAAGTTTAGTCGGGTCACAT  | 0  | 9   | RDR2-sensitive |
| TGCTAACGCGCGGAACGACGACAC  | 1  | 17  | RDR2-sensitive |
| TGCTAACTGGACAGCACTCGGCAA  | 5  | 103 | RDR2-sensitive |
| TGCTAATGTCGTACGGGCACACAG  | 74 | 0   | RDR2-resistant |
| TGCTACACGACAAGAGAACCGGCT  | 0  | 11  | RDR2-sensitive |
| TGCTACAGGACAGGTTCCGGTACAC | 0  | 9   | RDR2-sensitive |
| TGCTACGAGCGAGATCTTGTCCGGT | 0  | 11  | RDR2-sensitive |
| TGCTACGTACTGTTTTCGTCCGACC | 61 | 3   | RDR2-resistant |
| TGCTAGATCTTGGGCACTCGGCAA  | 0  | 12  | RDR2-sensitive |
| TGCTAGATGTGGGCACTCGGCAA   | 0  | 25  | RDR2-sensitive |
| TGCTAGCGACATAACTCGGCAA    | 0  | 19  | RDR2-sensitive |
| TGCTAGCGATGGCGGCTGGAGAGC  | 17 | 0   | RDR2-resistant |
| TGCTAGCTGAAGAAGGACGAGCAA  | 0  | 10  | RDR2-sensitive |
| TGCTAGCTGGACAGCACTCGGCAA  | 1  | 12  | RDR2-sensitive |



|                          |    |     |                |
|--------------------------|----|-----|----------------|
| TGCTAGCTGTAGAGCACTCGGCAA | 1  | 59  | RDR2-sensitive |
| TGCTAGGACCATAACACTCGGCAA | 0  | 11  | RDR2-sensitive |
| TGCTAGGACCATAGCACTAGGCAA | 0  | 11  | RDR2-sensitive |
| TGCTAGGAGCCTAGGACGACGGTG | 0  | 15  | RDR2-sensitive |
| TGCTAGGGGTCAGTGGAAATCAGC | 0  | 10  | RDR2-sensitive |
| TGCTAGGTTTCGGACGGTCCGGCC | 22 | 1   | RDR2-resistant |
| TGCTATAGATATGAGACAGACGTT | 22 | 0   | RDR2-resistant |
| TGCTATGAATTAAGAACAAGGCAA | 5  | 68  | RDR2-sensitive |
| TGCTATGACCATGGCACTCGGCAA | 4  | 22  | RDR2-sensitive |
| TGCTATGACCTTGACACTCGGCAA | 0  | 11  | RDR2-sensitive |
| TGCTATGGTTGTTGCACTCGGCAA | 0  | 9   | RDR2-sensitive |
| TGCTAACACCGCCGAATCGTCGC  | 0  | 9   | RDR2-sensitive |
| TGCTCACATGAGCACGGACGTCGC | 0  | 13  | RDR2-sensitive |
| TGCTCACATGAGCACGGACGTCGT | 0  | 16  | RDR2-sensitive |
| TGCTCAGACTGTCCGGTTGCACAC | 0  | 12  | RDR2-sensitive |
| TGCTCAGTCGTCACTGTGCCGGCC | 0  | 9   | RDR2-sensitive |
| TGCTCCCGTGGCTTGTAGTGGGCT | 49 | 7   | RDR2-resistant |
| TGCTCCGGACCAACAGTACAGCAT | 0  | 24  | RDR2-sensitive |
| TGCTCCGGTAGACGCTGCGTCCAT | 0  | 15  | RDR2-sensitive |
| TGCTCCTGCATGAGGTCGTCCGAT | 0  | 15  | RDR2-sensitive |
| TGCTCCTGTTTCTGCTCGTCTAC  | 18 | 0   | RDR2-resistant |
| TGCTCGATGGCGCACCGGACAGTC | 3  | 19  | RDR2-sensitive |
| TGCTCGCATGTAGGTTGATCGGT  | 1  | 24  | RDR2-sensitive |
| TGCTCGGGCTGGCACACGCGGCGA | 0  | 9   | RDR2-sensitive |
| TGCTCGTACGTCTAGAACCGGCGT | 0  | 11  | RDR2-sensitive |
| TGCTCGTAGGACAGAGACCGGCCT | 0  | 32  | RDR2-sensitive |
| TGCTCGTCCATGCTGTCCGGCCGT | 0  | 9   | RDR2-sensitive |
| TGCTCTAGTTGCCGACTCAGGCGT | 0  | 10  | RDR2-sensitive |
| TGCTCTCGAGAAGAACGGTAACAT | 0  | 29  | RDR2-sensitive |
| TGCTCTCGAACTCGGCTCCGGC   | 17 | 0   | RDR2-resistant |
| TGCTCTCGGAACTAGTCAACGCAT | 0  | 9   | RDR2-sensitive |
| TGCTCTCGGGACTTCGACGACGGT | 0  | 9   | RDR2-sensitive |
| TGCTCTCTAGTCAGGCGCGAACGG | 0  | 9   | RDR2-sensitive |
| TGCTCTCTATAGCGGTACGGACGG | 0  | 11  | RDR2-sensitive |
| TGCTCTCTGATCAGGCACGGACGG | 0  | 37  | RDR2-sensitive |
| TGCTCTCTGCACAGGCACGGACGG | 0  | 44  | RDR2-sensitive |
| TGCTCTCTGCACAGGCGCGGACGG | 6  | 108 | RDR2-sensitive |
| TGCTCTCTGCACAGGCGTGGACGA | 0  | 29  | RDR2-sensitive |
| TGCTCTCTGCACAGGCGTGGACGG | 0  | 15  | RDR2-sensitive |
| TGCTCTCTGCACAGGGCCGGACGG | 0  | 19  | RDR2-sensitive |
| TGCTCTCTGCACAGGGGCGGACGA | 0  | 12  | RDR2-sensitive |
| TGCTCTCTGCACAGGGGCGGACGG | 5  | 156 | RDR2-sensitive |
| TGCTCTCTGCGGCACGCGGACGGT | 0  | 29  | RDR2-sensitive |
| TGCTCTCTGCGGCGCACGGACGGT | 0  | 11  | RDR2-sensitive |
| TGCTCTCTGGTCAAGCGCGGACGG | 2  | 35  | RDR2-sensitive |
| TGCTCTCTGGTCAGACGTGGACGG | 0  | 23  | RDR2-sensitive |
| TGCTCTCTGGTCAGCCGCGGACGG | 0  | 13  | RDR2-sensitive |
| TGCTCTCTGGTCAGGCACGGACGG | 6  | 30  | RDR2-sensitive |
| TGCTCTCTGGTCAGGCGCGAACGG | 0  | 11  | RDR2-sensitive |

|                          |    |     |                |
|--------------------------|----|-----|----------------|
| TGCTCTCTGGTCAGGCGCGGACGA | 0  | 14  | RDR2-sensitive |
| TGCTCTCTGGTCAGGCGCGGACGG | 15 | 512 | RDR2-sensitive |
| TGCTCTCTGGTCAGGCGTGGACGG | 1  | 33  | RDR2-sensitive |
| TGCTCTCTGGTCAGGGCGGACGG  | 0  | 9   | RDR2-sensitive |
| TGCTCTCTGTACAGGGCGGACGG  | 0  | 10  | RDR2-sensitive |
| TGCTCTCTGTAGAAGCACGGACGG | 0  | 11  | RDR2-sensitive |
| TGCTCTCTGTAGAGGCGTGGACGG | 1  | 25  | RDR2-sensitive |
| TGCTCTCTGTCAGGCGCGGACGGT | 0  | 9   | RDR2-sensitive |
| TGCTCTCTGTGGAGGCACGAACGG | 0  | 10  | RDR2-sensitive |
| TGCTCTCTGTGGAGGCACGGACGG | 0  | 10  | RDR2-sensitive |
| TGCTCTCTGTGGAGGCGCGGACGG | 0  | 22  | RDR2-sensitive |
| TGCTCTCTGTGGAGTCGTGGACGG | 0  | 10  | RDR2-sensitive |
| TGCTCTGAATGTCAAAGTGAAGAA | 26 | 4   | RDR2-resistant |
| TGCTCTGGTTGGCGGCCTGACGGC | 0  | 12  | RDR2-sensitive |
| TGCTCTGTGACGACGGCGGCTCTC | 3  | 16  | RDR2-sensitive |
| TGCTGAACACTCGGCACAGGACGA | 1  | 22  | RDR2-sensitive |
| TGCTGAACACTCGGCACAGGACGC | 0  | 18  | RDR2-sensitive |
| TGCTGAACACTCGGCACAGGACGG | 0  | 10  | RDR2-sensitive |
| TGCTGAACACTCGGTACAGGACGA | 0  | 11  | RDR2-sensitive |
| TGCTGAACGACAGTGGGACATCAG | 0  | 14  | RDR2-sensitive |
| TGCTGAAGAGCTGCAAGCCTGCAT | 0  | 36  | RDR2-sensitive |
| TGCTGACAATGCAGTATCTTCGGC | 24 | 2   | RDR2-resistant |
| TGCTGACACGCGGAACGACGACGA | 0  | 16  | RDR2-sensitive |
| TGCTGACGCGCAGAACGACGACGA | 0  | 11  | RDR2-sensitive |
| TGCTGACGCGCGGAACGACGACAA | 0  | 19  | RDR2-sensitive |
| TGCTGACGCGCGGAACGACGACGA | 2  | 101 | RDR2-sensitive |
| TGCTGACTGTAGGAGGCACCCAC  | 0  | 60  | RDR2-sensitive |
| TGCTGACTTCGTAGCAACGCACGG | 0  | 10  | RDR2-sensitive |
| TGCTGATAGCAGGACTCTCGGCAC | 0  | 20  | RDR2-sensitive |
| TGCTGATAGGGCCGCAATTTGAGC | 22 | 1   | RDR2-resistant |
| TGCTGATCAATCTGGTAGAGGATA | 42 | 2   | RDR2-resistant |
| TGCTGATGCGCAGAACGACGACGA | 0  | 13  | RDR2-sensitive |
| TGCTGATTCTCTTGCCATAGACGT | 37 | 0   | RDR2-resistant |
| TGCTGCAGAACTAGGCATTGGGTT | 0  | 27  | RDR2-sensitive |
| TGCTGCAGACTGCCAACGCTCAG  | 0  | 20  | RDR2-sensitive |
| TGCTGCAGCGAAGACTTCGAGCGA | 0  | 9   | RDR2-sensitive |
| TGCTGCAGTAGCCGGCGCGTCCGT | 0  | 10  | RDR2-sensitive |
| TGCTGCATATGGACCTCTTCGGAC | 66 | 16  | RDR2-resistant |
| TGCTGCCAGGAGGACACTCGGCAA | 0  | 10  | RDR2-sensitive |
| TGCTGCGACGAGGACGATTGGCGC | 34 | 0   | RDR2-resistant |
| TGCTGCGCTGGCACAAACGGACGT | 0  | 10  | RDR2-sensitive |
| TGCTGCGTTGGCACAAACGGACGT | 0  | 14  | RDR2-sensitive |
| TGCTGCTCCAGTGACAGGCTGCA  | 0  | 12  | RDR2-sensitive |
| TGCTGCTTAGAGACGAGGACGCGA | 0  | 21  | RDR2-sensitive |
| TGCTGCTTTTGAGCTGGACGGCGT | 0  | 17  | RDR2-sensitive |
| TGCTGCTTTTGGCGGGTGGTAGGT | 14 | 0   | RDR2-resistant |
| TGCTGGAACGGGGACGGATGCAC  | 1  | 18  | RDR2-sensitive |
| TGCTGGAATGTAGATAGATGTCAT | 0  | 11  | RDR2-sensitive |
| TGCTGGACACAAAAAGGAGGCTGT | 0  | 11  | RDR2-sensitive |

|                           |     |    |                |
|---------------------------|-----|----|----------------|
| TGCTGGACACTCGGCACAGGACCC  | 0   | 14 | RDR2-sensitive |
| TGCTGGACACTCGGCACAGGACGA  | 2   | 23 | RDR2-sensitive |
| TGCTGGACGCCATAGCGGACGTAT  | 0   | 15 | RDR2-sensitive |
| TGCTGGACGCCGTAGCGGACGTAT  | 0   | 28 | RDR2-sensitive |
| TGCTGGACTGATGAATAGTGTGCT  | 0   | 13 | RDR2-sensitive |
| TGCTGGAGAGCATAGAGGACCATT  | 0   | 10 | RDR2-sensitive |
| TGCTGGAGAGCATAGAGGACCGTT  | 0   | 17 | RDR2-sensitive |
| TGCTGGAGAGCGTAGAAGACCGTT  | 0   | 9  | RDR2-sensitive |
| TGCTGGAGAGCGTAGAGGACCATT  | 0   | 27 | RDR2-sensitive |
| TGCTGGAGAGCGTAGAGGACCGTT  | 0   | 24 | RDR2-sensitive |
| TGCTGGAGAGTGTAGAAGACCGTT  | 1   | 25 | RDR2-sensitive |
| TGCTGGAGCGCTACCGGACGGTAA  | 0   | 19 | RDR2-sensitive |
| TGCTGGAGCGGTATTACTCAAAGC  | 25  | 0  | RDR2-resistant |
| TGCTGGAGGGAGTAGACGACGAGA  | 0   | 11 | RDR2-sensitive |
| TGCTGGAGGGAGTAGAGGACGTCC  | 2   | 34 | RDR2-sensitive |
| TGCTGGAGGGCGTAGAGGACCATT  | 0   | 26 | RDR2-sensitive |
| TGCTGGAGGGCTAGAGGACGTCTGA | 0   | 9  | RDR2-sensitive |
| TGCTGGAGGGGTAGAGGACGTCTT  | 0   | 10 | RDR2-sensitive |
| TGCTGGATCTCGGGCACTCGGCAA  | 4   | 25 | RDR2-sensitive |
| TGCTGGATCTTGAGTGGAGCGACG  | 0   | 10 | RDR2-sensitive |
| TGCTGGATTGCTGACAGGTTGGCT  | 107 | 3  | RDR2-resistant |
| TGCTGGATTTGCTGGTCGCTGGAT  | 2   | 20 | RDR2-sensitive |
| TGCTGGCCTGTGGATAGCACGCGC  | 0   | 30 | RDR2-sensitive |
| TGCTGGGAGTCCTTTCATTTCGGT  | 17  | 0  | RDR2-resistant |
| TGCTGGTCTGTGGAGATAGGCTAT  | 0   | 17 | RDR2-sensitive |
| TGCTGGTTGACTCACGGGGAGGTT  | 22  | 1  | RDR2-resistant |
| TGCTGTAAGATATGATTGGTGTGC  | 58  | 5  | RDR2-resistant |
| TGCTGTAGACGGCCTTAGGAGCGT  | 0   | 9  | RDR2-sensitive |
| TGCTGTAGAGCGTAGAGGACCGTT  | 0   | 12 | RDR2-sensitive |
| TGCTGTAGCACTTGGACAGTCGGA  | 0   | 9  | RDR2-sensitive |
| TGCTGTAGTGGCGAACATATAGAA  | 43  | 1  | RDR2-resistant |
| TGCTGTATCATTTCGTCGGCACAC  | 0   | 15 | RDR2-sensitive |
| TGCTGTCAGGCAGACACTCGGCAA  | 0   | 9  | RDR2-sensitive |
| TGCTGTCTGAACCATGGAAGATGC  | 0   | 13 | RDR2-sensitive |
| TGCTGTCTGTAGAGGTGCGGACGG  | 0   | 11 | RDR2-sensitive |
| TGCTGTGAGCCAGGCTATGAGCGT  | 0   | 14 | RDR2-sensitive |
| TGCTGTGAGCCAGGCTATGCGCGT  | 0   | 11 | RDR2-sensitive |
| TGCTGTGAGTCAGACTATACGCGT  | 0   | 9  | RDR2-sensitive |
| TGCTGTGCCGCTCTGAAGCCGGTT  | 0   | 13 | RDR2-sensitive |
| TGCTGTGGAAGTCTGGCAGGGGTT  | 0   | 10 | RDR2-sensitive |
| TGCTGTGGACCCGGAGTAGGCGCC  | 0   | 14 | RDR2-sensitive |
| TGCTGTGGACTGTGAGCGGTGGAA  | 0   | 13 | RDR2-sensitive |
| TGCTGTGGGCTGTGAGATGTGTAA  | 0   | 14 | RDR2-sensitive |
| TGCTGTGGGTCGATGACTGGGCAC  | 0   | 10 | RDR2-sensitive |
| TGCTGTTAGATGTAAGATGGATGC  | 0   | 11 | RDR2-sensitive |
| TGCTGTTAGCGGTGGTAGGGAGC   | 30  | 0  | RDR2-resistant |
| TGCTGTTCTGATGGAAGTTGGCGC  | 0   | 11 | RDR2-sensitive |
| TGCTGTTGGATACGTAGAAGACGA  | 0   | 15 | RDR2-sensitive |
| TGCTTAGTGTCCGGTCCGGTCCGGT | 0   | 13 | RDR2-sensitive |

|                               |     |     |                |
|-------------------------------|-----|-----|----------------|
| TGCTTAGTTCTTGAGTGTTGGACC      | 62  | 2   | RDR2-resistant |
| TGCTTCAGACGACTCGAACGGCGC      | 1   | 109 | RDR2-sensitive |
| TGCTTCCAGGAGGACACTCGGCAA      | 0   | 14  | RDR2-sensitive |
| TGCTTCCTACTGTAGCATGATGGC      | 0   | 16  | RDR2-sensitive |
| TGCTTCGACTGGTGGCCCGACGGC      | 0   | 14  | RDR2-sensitive |
| TGCTTCGGACACTCGGCAAAGCAC      | 0   | 13  | RDR2-sensitive |
| TGCTTCGGACACTCGGCAAAGCAG      | 0   | 25  | RDR2-sensitive |
| TGCTTCGGCTGAGGGCCCGACGGC      | 0   | 20  | RDR2-sensitive |
| TGCTTCGGGCACTCGGCAAAGCGC      | 1   | 23  | RDR2-sensitive |
| TGCTTCTAGTCGACGTAGAGACGA      | 0   | 21  | RDR2-sensitive |
| TGCTTCTCGGCGAAGACTGGGCCT      | 7   | 24  | RDR2-sensitive |
| TGCTTCTCTGCAGGACAATGGTAT      | 0   | 13  | RDR2-sensitive |
| TGCTTCTCTGCAGGACGACGACAT      | 0   | 27  | RDR2-sensitive |
| TGCTTCTCTGCAGGACGACGATAT      | 0   | 11  | RDR2-sensitive |
| TGCTTCTCTGCAGGACGATGGTAT      | 0   | 15  | RDR2-sensitive |
| TGCTTCTCTGCAGGGCGACGGTAT      | 0   | 9   | RDR2-sensitive |
| TGCTTCTGCGATTGATTGGACGTT      | 14  | 0   | RDR2-resistant |
| TGCTTCTTCGATCGTTTCGGACGTC     | 14  | 0   | RDR2-resistant |
| TGCTTCTTCTAGGGTCAGTCGGCC      | 0   | 12  | RDR2-sensitive |
| TGCTTGACGTAGTGGCAGAACCGG      | 0   | 11  | RDR2-sensitive |
| TGCTTGGACGGCTACGGACAACCTC     | 0   | 10  | RDR2-sensitive |
| TGCTTGGGCTCCCTGCTGCGCGGT      | 0   | 32  | RDR2-sensitive |
| TGCTTGTACGCGAGGAACGATGGC      | 0   | 9   | RDR2-sensitive |
| TGCTTTAACTCGGGCACTCGGCAA      | 0   | 20  | RDR2-sensitive |
| TGCTTTAATGATCTGTAGGTGCAG      | 0   | 19  | RDR2-sensitive |
| TGCTTTATTTTCGGGCACTCGGCAA     | 2   | 18  | RDR2-sensitive |
| TGCTTTCAGGAGTAGGACGGTGTT      | 1   | 12  | RDR2-sensitive |
| TGCTTTCGGACCGATGGCCCATAT      | 0   | 11  | RDR2-sensitive |
| TGCTTTCCTATCGGGCACTCGGCAA     | 5   | 19  | RDR2-sensitive |
| TGCTTTCCTGCACAGGCGCGGACGG     | 0   | 10  | RDR2-sensitive |
| TGCTTTCCTGGTCAGGCGCGGACGG     | 0   | 9   | RDR2-sensitive |
| TGCTTTCCTGTCTGGGCACTCGGCAA    | 0   | 24  | RDR2-sensitive |
| TGCTTTCCTGTCTGGGTACTIONCGGCAA | 0   | 11  | RDR2-sensitive |
| TGCTTTCCTTATACAAGCAGTCGGT     | 0   | 23  | RDR2-sensitive |
| TGCTTTCCTGTCTGGCACTCGGCAA     | 0   | 13  | RDR2-sensitive |
| TGCTTTCCTTATGTAGGACAACGTCGT   | 0   | 23  | RDR2-sensitive |
| TGCTTTCCTTTCATCGGCACTCGGCAA   | 0   | 14  | RDR2-sensitive |
| TGCTTTCCTTTCATCGGGCACTAGGCAA  | 0   | 19  | RDR2-sensitive |
| TGCTTTCCTTTCAGTAGGACGGTGTCAT  | 0   | 9   | RDR2-sensitive |
| TGCTTTCCTTTCGGGGTGGTAGGTAGT   | 20  | 0   | RDR2-resistant |
| TGCTTTCCTTTCGGGTAGGACGACGTCGT | 4   | 48  | RDR2-sensitive |
| TGCTTTCCTTTCGGGTAGGACGGTGCTGT | 0   | 11  | RDR2-sensitive |
| TGCTTTCCTTTCGGGTAGGATGACGTCGT | 0   | 9   | RDR2-sensitive |
| TGCTTTCCTTTCGTAGGACGGTGTTGT   | 0   | 10  | RDR2-sensitive |
| TGCTTTCCTTTCGTTGTACTIONCCGGCT | 23  | 0   | RDR2-resistant |
| TGCTTTCCTTTCATCGGCACTCGGCAA   | 18  | 306 | RDR2-sensitive |
| TGCTTTCCTTTCATCGGCACTCGGCCA   | 0   | 13  | RDR2-sensitive |
| TGCTTTCCTTTCATCGGCACTTGGCAA   | 0   | 45  | RDR2-sensitive |
| TGCTTTCCTTTCATCGGGCACTCGGCAA  | 106 | 761 | RDR2-sensitive |

|                           |    |     |                |
|---------------------------|----|-----|----------------|
| TGCTTTTTATCGGGCACTCGGCAC  | 4  | 25  | RDR2-sensitive |
| TGCTTTTTATCGGGCACTCGGCAT  | 2  | 35  | RDR2-sensitive |
| TGCTTTTTATCGGGCACTCGGCCA  | 5  | 24  | RDR2-sensitive |
| TGCTTTTTATCGGGTACTCGGCAA  | 0  | 10  | RDR2-sensitive |
| TGCTTTTTCTCGGACAGTCGGCAA  | 3  | 50  | RDR2-sensitive |
| TGCTTTTTCTCGGGCACTCGGCAA  | 19 | 132 | RDR2-sensitive |
| TGCTTTTTGATCAACGGACTTACC  | 26 | 2   | RDR2-resistant |
| TGCTTTTTGCAAATCGTTTGGCAC  | 0  | 24  | RDR2-sensitive |
| TGCTTTTTGGTGTAGGACGGTGTT  | 0  | 9   | RDR2-sensitive |
| TGCTTTTTGTCTGGGCACTTGGTAA | 0  | 11  | RDR2-sensitive |
| TGCTTTTTGTCTGGGCACTCGGCAA | 1  | 82  | RDR2-sensitive |
| TGCTTTTTGTCTGGGCACTCGGCAC | 0  | 11  | RDR2-sensitive |
| TGCTTTTTGTCTGGGCACTCGGCAT | 0  | 11  | RDR2-sensitive |
| TGCTTTTTGTCTGGGCACTTGGCAA | 0  | 37  | RDR2-sensitive |
| TGCTTTTTGTTGGGCACTCGGCAA  | 0  | 36  | RDR2-sensitive |
| TGCTTTTTGTTGGGCACTCGGCAT  | 0  | 130 | RDR2-sensitive |
| TGCTTTTTTATCGGACACTCGGCA  | 0  | 14  | RDR2-sensitive |
| TGCTTTTTTTCGGGCACTCGGCAA  | 23 | 147 | RDR2-sensitive |
| TGCTTTTTTTGGGCACTCGGCAA   | 0  | 11  | RDR2-sensitive |
| TGGAAAACACTCGGCGAAGGCTTT  | 0  | 18  | RDR2-sensitive |
| TGGAAAACGAACTCCACGGTGCAG  | 0  | 34  | RDR2-sensitive |
| TGGAAAAGGCAGTAGAACGGGCGC  | 0  | 9   | RDR2-sensitive |
| TGGAAACGGACAGGGGGCAGGCGT  | 0  | 10  | RDR2-sensitive |
| TGGAAAGGCAGAACCGTGCACCAA  | 1  | 14  | RDR2-sensitive |
| TGGAAATTCTGGGATACACTTATA  | 15 | 0   | RDR2-resistant |
| TGGAACAAAGCACGGCCTGACACG  | 0  | 10  | RDR2-sensitive |
| TGGAACAGACCCTGTGTGGACGCC  | 0  | 11  | RDR2-sensitive |
| TGGAACATAGCGAGGACGAACGTT  | 0  | 9   | RDR2-sensitive |
| TGGAACCAGATTATGACCGGTTGC  | 25 | 0   | RDR2-resistant |
| TGGAACCGAGCTCGGCGCCACAGA  | 1  | 15  | RDR2-sensitive |
| TGGAACCTGGAAGCGGAGCTCGGC  | 0  | 17  | RDR2-sensitive |
| TGGAACGGACGACGACAACCTCAT  | 6  | 51  | RDR2-sensitive |
| TGGAACTTGAATTATGGTGCTGGA  | 32 | 0   | RDR2-resistant |
| TGGAACTTGGAACTGGATCCGGCT  | 0  | 22  | RDR2-sensitive |
| TGGAACTTTTCTGACTGTTGAGGC  | 37 | 0   | RDR2-resistant |
| TGGAAGACAGAGCGTGTGGCAT    | 0  | 11  | RDR2-sensitive |
| TGGAAGATGCATCTGTAGATCGAC  | 18 | 0   | RDR2-resistant |
| TGGAAGCACGTAGAGAAGGAGCAG  | 1  | 17  | RDR2-sensitive |
| TGGAAGCTGTGAACCGTCATGCAA  | 0  | 17  | RDR2-sensitive |
| TGGAAGGATCGACAGGCGCGAGAC  | 70 | 16  | RDR2-resistant |
| TGGAAGGCCAGGTAGAGCGGTTAG  | 0  | 17  | RDR2-sensitive |
| TGGAAGGCTAGGCATTCTGCTCAA  | 0  | 16  | RDR2-sensitive |
| TGGAAGGCTGCAGTCGCATGGCGC  | 3  | 19  | RDR2-sensitive |
| TGGAAGGCTGTAGTCGGGCCGTGA  | 0  | 9   | RDR2-sensitive |
| TGGAAGTAGGGACGTTCTGCCCGA  | 0  | 9   | RDR2-sensitive |
| TGGAAGTATGAGGACGCTCACCAA  | 0  | 16  | RDR2-sensitive |
| TGGAAGTATGCTTTTATGTCTGGA  | 45 | 0   | RDR2-resistant |
| TGGAATAAGGATTAACGTGCGGAT  | 17 | 0   | RDR2-resistant |
| TGGAATCGAACGGCTCAGCTGCAT  | 0  | 11  | RDR2-sensitive |

|                           |     |     |                |
|---------------------------|-----|-----|----------------|
| TGGAATCTCTCGAGGGTAGACCAG  | 0   | 9   | RDR2-sensitive |
| TGGAATCTGGATGACGTGACGTAA  | 0   | 16  | RDR2-sensitive |
| TGGAATGAACAGTTTGACGTTAGT  | 40  | 3   | RDR2-resistant |
| TGGAATGGACAGCTTGCTTCGGCA  | 16  | 0   | RDR2-resistant |
| TGGAATGGCAGAACAGCGGGGCAT  | 0   | 9   | RDR2-sensitive |
| TGGAATTGGCTGGTATGATGGCGT  | 0   | 16  | RDR2-sensitive |
| TGGACAAACAGATCACGCGAGCAG  | 0   | 11  | RDR2-sensitive |
| TGGACAAAGTCGGGTGCATCTCAT  | 0   | 13  | RDR2-sensitive |
| TGGACAACAGACTGCACACGGCGA  | 0   | 10  | RDR2-sensitive |
| TGGACAACCCTGTAGTAGATGCAC  | 0   | 47  | RDR2-sensitive |
| TGGACAACCTGAACCTGAGACCAT  | 0   | 44  | RDR2-sensitive |
| TGGACAACGAGATGACGGACACAT  | 1   | 15  | RDR2-sensitive |
| TGGACAAGAGCGTAGCGATGCCAA  | 0   | 18  | RDR2-sensitive |
| TGGACACAAGCTGACGACGACGGC  | 0   | 13  | RDR2-sensitive |
| TGGACACACACTCGGCCAAAGACAG | 0   | 10  | RDR2-sensitive |
| TGGACACCAAAATGAGCGGACGGT  | 3   | 75  | RDR2-sensitive |
| TGGACACCAATAGCGCAATGGCAT  | 0   | 16  | RDR2-sensitive |
| TGGACACCACAAGCCGATCGACAT  | 0   | 11  | RDR2-sensitive |
| TGGACACCTGCGTGTACGGCCTGT  | 0   | 10  | RDR2-sensitive |
| TGGACACGAAGAGAACGACTCCAT  | 0   | 31  | RDR2-sensitive |
| TGGACACGACTGAGGAGTGGACGT  | 0   | 25  | RDR2-sensitive |
| TGGACACGTTTACAGATACGACAT  | 0   | 9   | RDR2-sensitive |
| TGGACACTCGGCACAGAAAGACAC  | 0   | 13  | RDR2-sensitive |
| TGGACACTCGGCACAGGACGACAC  | 6   | 43  | RDR2-sensitive |
| TGGACAGAACTGCAGCAGACCGGT  | 15  | 0   | RDR2-resistant |
| TGGACAGAAGTCAACAGATCGCGC  | 0   | 32  | RDR2-sensitive |
| TGGACAGACACATAATTACTCTTA  | 16  | 0   | RDR2-resistant |
| TGGACAGACGGTAAGCCGGGACAC  | 0   | 10  | RDR2-sensitive |
| TGGACAGAGCAGAGGCTACGGAAC  | 0   | 14  | RDR2-sensitive |
| TGGACAGAGCATGGGCATGGATTT  | 0   | 11  | RDR2-sensitive |
| TGGACAGATACGGCGACGGGCGAC  | 0   | 9   | RDR2-sensitive |
| TGGACAGCGGCTGGGAGGAGGGCC  | 360 | 19  | RDR2-resistant |
| TGGACAGGAAACTAGGCACGACAG  | 0   | 14  | RDR2-sensitive |
| TGGACAGGAAACTAGGCACGACGC  | 2   | 134 | RDR2-sensitive |
| TGGACAGGAAACTAGGCACGACGG  | 0   | 43  | RDR2-sensitive |
| TGGACAGGAAACTAGGCACGGCGG  | 2   | 21  | RDR2-sensitive |
| TGGACAGGAAACTAGGCACGGCGT  | 0   | 11  | RDR2-sensitive |
| TGGACAGGAAACTAGGCACGGTAG  | 0   | 21  | RDR2-sensitive |
| TGGACAGGAAAGCCTGAAACGGAG  | 0   | 12  | RDR2-sensitive |
| TGGACAGGGAAGAAGAGCACGGAT  | 0   | 25  | RDR2-sensitive |
| TGGACAGTTTTATGATTTTCTGA   | 16  | 0   | RDR2-resistant |
| TGGACAGTCTGAACGTATGCAGAG  | 0   | 9   | RDR2-sensitive |
| TGGACAGTGCTGGCAGAACACGAG  | 0   | 18  | RDR2-sensitive |
| TGGACAGTGTAAAGCGGATGGGTAT | 0   | 23  | RDR2-sensitive |
| TGGACAGTTTGCAGTAGGAGTCGC  | 0   | 13  | RDR2-sensitive |
| TGGACATAACTTTAGCTGACGGCA  | 19  | 0   | RDR2-resistant |
| TGGACATAATGTTATATTTCGACGG | 0   | 10  | RDR2-sensitive |
| TGGACATCGGAACACAGACGGCGT  | 0   | 10  | RDR2-sensitive |
| TGGACATGCGCACGACCTTGGGCT  | 21  | 0   | RDR2-resistant |

|                           |     |    |                |
|---------------------------|-----|----|----------------|
| TGGACATGCGTGGATGCGCTCTGT  | 0   | 14 | RDR2-sensitive |
| TGGACATGGCACCCCTGACGGAGCT | 38  | 0  | RDR2-resistant |
| TGGACATGTATACCCAGGACGGAC  | 0   | 9  | RDR2-sensitive |
| TGGACATGTATACGTACGCCTCAG  | 0   | 10 | RDR2-sensitive |
| TGGACATGTATAGCAGGAAGGTAT  | 1   | 12 | RDR2-sensitive |
| TGGACATGTATAGCCGGATGTCGT  | 0   | 11 | RDR2-sensitive |
| TGGACATGTATAGTCTGGGGGCAT  | 0   | 12 | RDR2-sensitive |
| TGGACCAAAGCGACGAAGGACGA   | 0   | 41 | RDR2-sensitive |
| TGGACCAAACCGGGCTCATTTCCGC | 0   | 10 | RDR2-sensitive |
| TGGACCAAATGACTAGGCACTCGT  | 0   | 11 | RDR2-sensitive |
| TGGACCAAGAGCGGTGAAGGACGA  | 0   | 48 | RDR2-sensitive |
| TGGACCAAGCACAGACTTCTGATG  | 25  | 0  | RDR2-resistant |
| TGGACCAAGCAGCTCCGACTTCAT  | 0   | 18 | RDR2-sensitive |
| TGGACCAAGTGGGCACCCATCCCT  | 21  | 0  | RDR2-resistant |
| TGGACCAATCAGATCGCGACACGT  | 1   | 14 | RDR2-sensitive |
| TGGACCAATCAGATCGCGCCACGT  | 0   | 10 | RDR2-sensitive |
| TGGACCAATTACACGTAGCCGAGC  | 4   | 35 | RDR2-sensitive |
| TGGACCAATTGAACGGGCCGAGCT  | 0   | 9  | RDR2-sensitive |
| TGGACCAGATTGAGGGGCTCTCAA  | 1   | 20 | RDR2-sensitive |
| TGGACCAGTCAGATCGCGCCACGT  | 0   | 15 | RDR2-sensitive |
| TGGACCATGCAAGACTTCCACTGC  | 0   | 12 | RDR2-sensitive |
| TGGACCATGCAGCTGCTTTGTAC   | 2   | 18 | RDR2-sensitive |
| TGGACCATGCATTAGACGAGCTGA  | 0   | 10 | RDR2-sensitive |
| TGGACCATGCGAGACTTCCACTGC  | 0   | 11 | RDR2-sensitive |
| TGGACCCCGGACTATTTGGCTAAA  | 15  | 0  | RDR2-resistant |
| TGGACCCGAAGCTCGGCGCCACAG  | 0   | 13 | RDR2-sensitive |
| TGGACCCGAAGGCAGGTAGGACAG  | 0   | 10 | RDR2-sensitive |
| TGGACCCGAATGCAGATAGGACAG  | 0   | 16 | RDR2-sensitive |
| TGGACCCGGAGACCCTCAACCGAC  | 70  | 12 | RDR2-resistant |
| TGGACCCGGCACGACTTTGGCGTG  | 0   | 10 | RDR2-sensitive |
| TGGACCCGTGACTGCTTGGAGGAC  | 35  | 6  | RDR2-resistant |
| TGGACCCTTAGCTCGGCGCCACAG  | 0   | 18 | RDR2-sensitive |
| TGGACCCTTAGCTCGGCGCCATAG  | 1   | 17 | RDR2-sensitive |
| TGGACCCTTCAGGCGAACATTCTC  | 0   | 11 | RDR2-sensitive |
| TGGACCCTTGTAGCCGGCTGCCAA  | 0   | 10 | RDR2-sensitive |
| TGGACCCTTTGCTCGGCGCCATAG  | 0   | 26 | RDR2-sensitive |
| TGGACCCTTTGCTCGGGACGCCAT  | 0   | 9  | RDR2-sensitive |
| TGGACCGAAGGTGTGACACGACAG  | 0   | 13 | RDR2-sensitive |
| TGGACCGACATGGACCGATGAGGC  | 0   | 18 | RDR2-sensitive |
| TGGACCGAGAGCGGTGAAGGACGA  | 0   | 14 | RDR2-sensitive |
| TGGACCGAGCCTTGACTTAATCGC  | 0   | 16 | RDR2-sensitive |
| TGGACCGATCTGACGAGGAAACAT  | 0   | 21 | RDR2-sensitive |
| TGGACCGATCTGGCACATTAAGGC  | 27  | 1  | RDR2-resistant |
| TGGACCGCAGGTAGATTTGGACGG  | 2   | 23 | RDR2-sensitive |
| TGGACCGCATGCTGATAGCCTCGA  | 122 | 15 | RDR2-resistant |
| TGGACCGCTGTCGTGGCACGCCGT  | 0   | 14 | RDR2-sensitive |
| TGGACCGGAAGCAGTGAAGGACGA  | 0   | 14 | RDR2-sensitive |
| TGGACCGGCTTCTGCGCGACGCGC  | 0   | 21 | RDR2-sensitive |
| TGGACCGGGAGCAGTGAAGGACGA  | 0   | 21 | RDR2-sensitive |

|                            |    |    |                |
|----------------------------|----|----|----------------|
| TGGACCGGGCCGAATGCATGACGG   | 0  | 15 | RDR2-sensitive |
| TGGACCGGGCTAAATTCGTGCCGT   | 0  | 15 | RDR2-sensitive |
| TGGACCGGGCTAAATTCGTGTCGT   | 0  | 13 | RDR2-sensitive |
| TGGACCGTATCGGGGGCTCGACGG   | 0  | 17 | RDR2-sensitive |
| TGGACCGTTCGACCACGAGACGCG   | 0  | 9  | RDR2-sensitive |
| TGGACCGTTGCAGAGTGGACAGTT   | 0  | 9  | RDR2-sensitive |
| TGGACCTAACTCAGGAGCGGACGT   | 0  | 38 | RDR2-sensitive |
| TGGACCTCCTGGAGAAGCTGGCGT   | 0  | 11 | RDR2-sensitive |
| TGGACCTGAGTAGCTATTTTACAT   | 0  | 12 | RDR2-sensitive |
| TGGACCTGAGTCGGGGCACACCGT   | 0  | 19 | RDR2-sensitive |
| TGGACCTGATGGCTTTAATGGCAA   | 49 | 4  | RDR2-resistant |
| TGGACCTGCATACATATATCTGAT   | 22 | 0  | RDR2-resistant |
| TGGACCTGGTCCCAGCGGTAGGCA   | 51 | 5  | RDR2-resistant |
| TGGACGAACTCGCCCGGACCCGGC   | 4  | 36 | RDR2-sensitive |
| TGGACGAAGCAGGGTCGACGACGT   | 0  | 18 | RDR2-sensitive |
| TGGACGAAGGGTGGAGACTGCCAG   | 0  | 12 | RDR2-sensitive |
| TGGACGAAGGTGGACCAGCGTCGT   | 0  | 10 | RDR2-sensitive |
| TGGACGAAGTAGGGGCGGGCCCAA   | 0  | 9  | RDR2-sensitive |
| TGGACGAAGTTATGTGCTGTCTGA   | 0  | 18 | RDR2-sensitive |
| TGGACGACAGAACGGTGGGTTCAT   | 0  | 9  | RDR2-sensitive |
| TGGACGACAGCGCGGCAGGTAGCT   | 0  | 10 | RDR2-sensitive |
| TGGACGACGATCAAACGCTGGTAT   | 0  | 14 | RDR2-sensitive |
| TGGACGACGGAACGACGGGTTCAT   | 0  | 15 | RDR2-sensitive |
| TGGACGACGTAGCATCAACGGTAG   | 0  | 11 | RDR2-sensitive |
| TGGACGAGAGTCAAGTAGGGACGA   | 0  | 14 | RDR2-sensitive |
| TGGACGAGATGTGCCTGTGATGGT   | 0  | 11 | RDR2-sensitive |
| TGGACGAGCACGAGCACGAACCGA   | 0  | 12 | RDR2-sensitive |
| TGGACGAGCGAACGTGGACGCGGC   | 0  | 30 | RDR2-sensitive |
| TGGACGAGGACTCCGCAGCCAGAC   | 0  | 15 | RDR2-sensitive |
| TGGACGCAATCGGACGGTTCGAGAT  | 0  | 9  | RDR2-sensitive |
| TGGACGCAATCGGACGGTTCGGGAT  | 1  | 12 | RDR2-sensitive |
| TGGACGCAAGGGGAGATGGACCCGC  | 0  | 78 | RDR2-sensitive |
| TGGACGCCACGAGGCAGAACCGT    | 0  | 11 | RDR2-sensitive |
| TGGACGCTAAGGCCCATCACCCAT   | 0  | 16 | RDR2-sensitive |
| TGGACGCTACATCTGGAGTTCGGC   | 0  | 16 | RDR2-sensitive |
| TGGACGCTACTCAGTACCGGCGCC   | 60 | 4  | RDR2-resistant |
| TGGACGCTGAGGAGGTGGCTCATC   | 21 | 0  | RDR2-resistant |
| TGGACGGAACACCGGGCGGCGGAT   | 0  | 18 | RDR2-sensitive |
| TGGACGGAACACCGGGTGC CGGAT  | 1  | 27 | RDR2-sensitive |
| TGGACGGAACACCGGGTGGCGGAT   | 0  | 29 | RDR2-sensitive |
| TGGACGGAATAGATGAGCGTGCAG   | 0  | 9  | RDR2-sensitive |
| TGGACGGACAGCGACGGTTCGGCAA  | 0  | 18 | RDR2-sensitive |
| TGGACGGACCATCCAAGACCGGAC   | 0  | 10 | RDR2-sensitive |
| TGGACGGACCTGGATGCGTGGATG   | 0  | 9  | RDR2-sensitive |
| TGGACGGAGAGAGGAGATAGTCAT   | 0  | 11 | RDR2-sensitive |
| TGGACGGAGAGAGGAGATCGTTCGT  | 0  | 15 | RDR2-sensitive |
| TGGACGGCGGGGAGGGTTCGCGCAG  | 46 | 2  | RDR2-resistant |
| TGGACGGCGTAGAGAACGTTTTTCGT | 1  | 53 | RDR2-sensitive |
| TGGACGGCGTAGAGAATGTTTTTCGT | 0  | 19 | RDR2-sensitive |



|                           |     |     |                |
|---------------------------|-----|-----|----------------|
| TGGACGGCTAGAGGAGGCTAACAT  | 0   | 12  | RDR2-sensitive |
| TGGACGGCTGAGATCGCAGAACGG  | 0   | 23  | RDR2-sensitive |
| TGGACGGGCTAGAATGTCAGCAT   | 0   | 11  | RDR2-sensitive |
| TGGACGGGGTGTACAAGTGGTAT   | 0   | 10  | RDR2-sensitive |
| TGGACGGTCACGGACAGACGCTAT  | 0   | 34  | RDR2-sensitive |
| TGGACGGTCCATGAGCAGGAACGT  | 0   | 11  | RDR2-sensitive |
| TGGACGGTCCGCGTCTAAAGTCGG  | 0   | 41  | RDR2-sensitive |
| TGGACGGTCTCATACGGCACTGAT  | 0   | 21  | RDR2-sensitive |
| TGGACGGTCTGGATGCGGCAGAAC  | 0   | 10  | RDR2-sensitive |
| TGGACGGTGCAGATGTGTGGACGT  | 0   | 24  | RDR2-sensitive |
| TGGACGGTGTAGAGAACGTTTCGT  | 0   | 11  | RDR2-sensitive |
| TGGACGTAAATGGACGGTTGGGAT  | 0   | 15  | RDR2-sensitive |
| TGGACGTAAATTGGACGGTTGGGAT | 0   | 11  | RDR2-sensitive |
| TGGACGTACCTGGAAGTGAAGGCG  | 1   | 29  | RDR2-sensitive |
| TGGACGTACGGCGAGATCTATCGG  | 0   | 16  | RDR2-sensitive |
| TGGACGTAGGGTTGACGAGCGCAT  | 0   | 9   | RDR2-sensitive |
| TGGACGTATATGCTGACATGGCAC  | 1   | 114 | RDR2-sensitive |
| TGGACGTCCCTAGCTACAACCTCAA | 0   | 15  | RDR2-sensitive |
| TGGACGTCCGCACTCTGGACCGGA  | 0   | 14  | RDR2-sensitive |
| TGGACGTCCCTGGGCCAGATGACGC | 0   | 10  | RDR2-sensitive |
| TGGACGTCCCTGGGCCTGATGACGC | 0   | 11  | RDR2-sensitive |
| TGGACGTCCCTGGGGTAGATGACGC | 0   | 12  | RDR2-sensitive |
| TGGACGTCCGAAGGGGGTAGACGGG | 0   | 9   | RDR2-sensitive |
| TGGACGTCTACTGAGCGAACACGG  | 0   | 36  | RDR2-sensitive |
| TGGACGTCTCTGGCTGACTGCGGG  | 26  | 4   | RDR2-resistant |
| TGGACTAAAATGGAGGCCAGCAC   | 0   | 13  | RDR2-sensitive |
| TGGACTAAAGTACCCCTACGGCGC  | 0   | 13  | RDR2-sensitive |
| TGGACTAACATGGACGGACACTAT  | 0   | 11  | RDR2-sensitive |
| TGGACTAACCTCCCCACATGACGA  | 0   | 11  | RDR2-sensitive |
| TGGACTAACCTCTCCACAGGACGA  | 2   | 172 | RDR2-sensitive |
| TGGACTAACCTCTCCACATGACGA  | 0   | 11  | RDR2-sensitive |
| TGGACTAACTGAGCAGTGAGTCAT  | 0   | 12  | RDR2-sensitive |
| TGGACTAGAATGAAGGCCAGCAC   | 0   | 22  | RDR2-sensitive |
| TGGACTAGCGCTCGGCCAAAGGGAG | 0   | 9   | RDR2-sensitive |
| TGGACTAGCTCTCGGCCAAAGACAG | 0   | 31  | RDR2-sensitive |
| TGGACTAGTAGCATACCGGTGCGT  | 1   | 47  | RDR2-sensitive |
| TGGACTAGTGATCCGGTGGGCCGG  | 0   | 12  | RDR2-sensitive |
| TGGACTAGTTGATGTTTTGGCATA  | 18  | 1   | RDR2-resistant |
| TGGACTATAAAAGGGAGGCCACAC  | 0   | 15  | RDR2-sensitive |
| TGGACTATAAGCGGTGAAGGACGA  | 0   | 15  | RDR2-sensitive |
| TGGACTATAGAGGGCTTCACCGAC  | 2   | 41  | RDR2-sensitive |
| TGGACTATCAGCGAAGGGTACCTG  | 0   | 9   | RDR2-sensitive |
| TGGACTATCTCTCAGATGGATGTC  | 54  | 6   | RDR2-resistant |
| TGGACTATGTAGAGGCGTAGTTGC  | 0   | 19  | RDR2-sensitive |
| TGGACTCAAGCACGATCAACACAT  | 0   | 14  | RDR2-sensitive |
| TGGACTCAAGCATGATCAACGCAT  | 0   | 10  | RDR2-sensitive |
| TGGACTCTCTCGGCTGAGCCGGCC  | 0   | 10  | RDR2-sensitive |
| TGGACTCTTGGATGAGGCACTGAT  | 102 | 30  | RDR2-resistant |
| TGGACTGACTTGGACGACAGGCGC  | 0   | 23  | RDR2-sensitive |

|                            |     |     |                |
|----------------------------|-----|-----|----------------|
| TGGACTGAGAGGGGCCGGATTGAT   | 0   | 9   | RDR2-sensitive |
| TGGACTGCAAGCGGTGAAGGACGA   | 0   | 14  | RDR2-sensitive |
| TGGACTGCGGGATCGGACGGCTGA   | 1   | 15  | RDR2-sensitive |
| TGGACTGCTCAAGCAAGAAAGAAC   | 23  | 2   | RDR2-resistant |
| TGGACTGCTCTCGGGTGTGGCGT    | 2   | 15  | RDR2-sensitive |
| TGGACTGGACAAGAAGGAGGACAA   | 0   | 14  | RDR2-sensitive |
| TGGACTGGATTCGGCCAAAACAC    | 0   | 115 | RDR2-sensitive |
| TGGACTGGCTACTGTAGTTCACGG   | 0   | 16  | RDR2-sensitive |
| TGGACTGGCTGAGTGCATGCAGTA   | 0   | 13  | RDR2-sensitive |
| TGGACTGGGACGAGCACGCACCAG   | 0   | 10  | RDR2-sensitive |
| TGGACTGGTCGTGATGACGCAGAT   | 0   | 11  | RDR2-sensitive |
| TGGACTGTCCAACGCAGGATACGC   | 15  | 0   | RDR2-resistant |
| TGGACTGTCCAGTGGAGCACCGGA   | 0   | 82  | RDR2-sensitive |
| TGGACTGTCCGCGACTACGCAGAG   | 0   | 11  | RDR2-sensitive |
| TGGACTGTCCGGCCACGGGACGGC   | 1   | 13  | RDR2-sensitive |
| TGGACTGTCCGTTCTGAGGCCGGA   | 0   | 17  | RDR2-sensitive |
| TGGACTGTTTGAATTTCCGGTCAT   | 0   | 13  | RDR2-sensitive |
| TGGACTTACCAGTATTGAAGGAAA   | 36  | 2   | RDR2-resistant |
| TGGACTTAGACGGTGTACAACAG    | 0   | 32  | RDR2-sensitive |
| TGGACTTAGAGCCCTGGCGACGGG   | 1   | 43  | RDR2-sensitive |
| TGGACTTAGGACCGTGGCGACGGG   | 0   | 10  | RDR2-sensitive |
| TGGACTTAGGGCCCTAGCGACGGT   | 0   | 12  | RDR2-sensitive |
| TGGACTTAGGGCCCTGACGACGGG   | 0   | 13  | RDR2-sensitive |
| TGGACTTAGGGCCCTGGCGACGGG   | 1   | 24  | RDR2-sensitive |
| TGGACTTAGGGCTCTGGCGACGGA   | 0   | 10  | RDR2-sensitive |
| TGGACTTCCGGACGGGTTCTTAT    | 1   | 13  | RDR2-sensitive |
| TGGACTTCCGGATCGTACCTAGGG   | 17  | 0   | RDR2-resistant |
| TGGACTTCCGGATCGTTCTTAGGG   | 27  | 0   | RDR2-resistant |
| TGGACTTGACTIONCCTCGGCCGGCT | 17  | 1   | RDR2-resistant |
| TGGACTTGTGGCCTCATCGGAC     | 125 | 16  | RDR2-resistant |
| TGGACTTTGGGCTAGGATTGGCCT   | 0   | 22  | RDR2-sensitive |
| TGGAGAACGTAGCAGCATGAGCGG   | 0   | 12  | RDR2-sensitive |
| TGGAGAAGACTCAGCCCGTGACGG   | 0   | 10  | RDR2-sensitive |
| TGGAGAAGTTGGCGTTTGGGCGAA   | 26  | 0   | RDR2-resistant |
| TGGAGACCTTGGGGCAGATGACGT   | 2   | 16  | RDR2-sensitive |
| TGGAGACGAGAAGGATGAGGTCAT   | 0   | 20  | RDR2-sensitive |
| TGGAGACGTAGGCGACAGACAAAC   | 0   | 9   | RDR2-sensitive |
| TGGAGACGTTGGCGATGGCTTCTC   | 1   | 16  | RDR2-sensitive |
| TGGAGACTTGGAGACGTGCGCTAT   | 0   | 15  | RDR2-sensitive |
| TGGAGAGCAGAACGCAGGGACGAC   | 0   | 12  | RDR2-sensitive |
| TGGAGAGCGGAGAGTTGGTGGCAT   | 21  | 0   | RDR2-resistant |
| TGGAGAGTCATGTAGAGACGGGCT   | 0   | 12  | RDR2-sensitive |
| TGGAGAGTGGAGGCGTGTGTAGAG   | 0   | 12  | RDR2-sensitive |
| TGGAGAGTTTGGCGCTGGAGTCGG   | 17  | 0   | RDR2-resistant |
| TGGAGATAAGGCACTGACATTTGA   | 27  | 1   | RDR2-resistant |
| TGGAGATCGACACCAGGCTGCAG    | 0   | 13  | RDR2-sensitive |
| TGGAGATGCGACCAATCTGCTCGT   | 0   | 11  | RDR2-sensitive |
| TGGAGCACTGTAGCGGGCCGGTTT   | 0   | 15  | RDR2-sensitive |
| TGGAGCGACGGGAGCTACGAGCAG   | 0   | 10  | RDR2-sensitive |

|                           |     |     |                |
|---------------------------|-----|-----|----------------|
| TGGAGCGACTGAATCGGATGACAT  | 0   | 12  | RDR2-sensitive |
| TGGAGCGCAGCGTGGATAATGACC  | 17  | 0   | RDR2-resistant |
| TGGAGCGGATCATACAGTCGACAT  | 0   | 9   | RDR2-sensitive |
| TGGAGCTCGGTTCTGTGCGTGCAA  | 0   | 19  | RDR2-sensitive |
| TGGAGCTCTGACAAGTGGGGCCAC  | 1   | 34  | RDR2-sensitive |
| TGGAGCTCTGACAGCTAGGGCCAC  | 0   | 10  | RDR2-sensitive |
| TGGAGCTGAAAGATCGGGAGTCGT  | 0   | 10  | RDR2-sensitive |
| TGGAGCTGAACTCTAGGAAGTCGT  | 0   | 19  | RDR2-sensitive |
| TGGAGCTTTACTGTTAGAGCAGGG  | 270 | 0   | RDR2-resistant |
| TGGAGGAAGTAGAGGACGACACAT  | 1   | 21  | RDR2-sensitive |
| TGGAGGACAGTAGCGCGGTGGTGG  | 356 | 112 | RDR2-resistant |
| TGGAGGACGAGGAGTAGGTTGGTA  | 24  | 0   | RDR2-resistant |
| TGGAGGCAGAACGCAGAACCAGGA  | 0   | 15  | RDR2-sensitive |
| TGGAGGCATACAGGAGGACATGGT  | 0   | 12  | RDR2-sensitive |
| TGGAGGCCAGAAGATTCCTGCAGG  | 17  | 0   | RDR2-resistant |
| TGGAGGCCGAGAGCTGACGTGGCAG | 0   | 12  | RDR2-sensitive |
| TGGAGGCTCCTCCGAGATCGAGGT  | 17  | 0   | RDR2-resistant |
| TGGAGGCTTTCAGGACGGTGAGTT  | 0   | 12  | RDR2-sensitive |
| TGGAGGGACAAGAGAGGACGCCAG  | 0   | 11  | RDR2-sensitive |
| TGGAGGGACGAGAGAGGACACCAG  | 2   | 17  | RDR2-sensitive |
| TGGAGGGACGAGAGAGGACATCAG  | 0   | 10  | RDR2-sensitive |
| TGGAGGGACGAGAGAGGACGACAG  | 0   | 26  | RDR2-sensitive |
| TGGAGGGACGAGAGAGGACGCCAG  | 2   | 34  | RDR2-sensitive |
| TGGAGGGACGAGAGAGGACGTCAG  | 0   | 12  | RDR2-sensitive |
| TGGAGGGATACCGGATACTGTCGT  | 0   | 9   | RDR2-sensitive |
| TGGAGGGATCCGTTGGACATGGCA  | 24  | 0   | RDR2-resistant |
| TGGAGGGTAGACGATGGCTCACTA  | 0   | 16  | RDR2-sensitive |
| TGGAGGTGAGCTCACTAGGCTGAA  | 30  | 0   | RDR2-resistant |
| TGGAGTAGCCGAGCATGCCTGTAT  | 27  | 1   | RDR2-resistant |
| TGGAGTCCCTGAACTCGGCTCGAA  | 20  | 0   | RDR2-resistant |
| TGGAGTCGGCGCCAAGGTCAGCGG  | 0   | 9   | RDR2-sensitive |
| TGGAGTCTGTTTTGATGATGCATG  | 82  | 1   | RDR2-resistant |
| TGGAGTGAGTAGACGACGTTCCGA  | 0   | 23  | RDR2-sensitive |
| TGGAGTGGACCGTGTTGCCGGCGT  | 0   | 15  | RDR2-sensitive |
| TGGAGTGGATTGAGGGGGATTGGA  | 4   | 19  | RDR2-sensitive |
| TGGAGTGGGTAGGAGAGAGACGAA  | 0   | 11  | RDR2-sensitive |
| TGGAGTTAGACGGGTGGTGGACGT  | 0   | 41  | RDR2-sensitive |
| TGGAGTTCGGACCTACCCGGAGGC  | 0   | 14  | RDR2-sensitive |
| TGGAGTTGCATCGTCCCGACGGTC  | 15  | 0   | RDR2-resistant |
| TGGAGTTTGGCTGTGCGGTGCGTC  | 20  | 0   | RDR2-resistant |
| TGGATAAGCTTGTAGACATAATAA  | 25  | 4   | RDR2-resistant |
| TGGATAAGTTAGGAGCACGATCAT  | 150 | 17  | RDR2-resistant |
| TGGATAACAACACTGAGGTAGTCAT | 1   | 25  | RDR2-sensitive |
| TGGATACATGCTAGGATGGACCAA  | 0   | 14  | RDR2-sensitive |
| TGGATACATGTGCTCCGAATCGGC  | 29  | 5   | RDR2-resistant |
| TGGATACGGAATCGAGTGGCTCAG  | 0   | 38  | RDR2-sensitive |
| TGGATACGTAGATGCAGCAGATGT  | 0   | 11  | RDR2-sensitive |
| TGGATACTCTCAGGACGGACGCAT  | 0   | 41  | RDR2-sensitive |
| TGGATATAGAGGACGTTGCTGGAG  | 0   | 11  | RDR2-sensitive |

|                           |     |    |                |
|---------------------------|-----|----|----------------|
| TGGATATCAGCATCGAGGACACAT  | 0   | 16 | RDR2-sensitive |
| TGGATATGATCAGATTCGTTTAAC  | 68  | 3  | RDR2-resistant |
| TGGATATGATCAGATTCGTTTAGC  | 58  | 7  | RDR2-resistant |
| TGGATATGCGGAAGGCTACAACATA | 0   | 9  | RDR2-sensitive |
| TGGATATGGGAGGGCAGATTGGCA  | 19  | 0  | RDR2-resistant |
| TGGATCAAGAAAGTAGATGAGGAA  | 28  | 0  | RDR2-resistant |
| TGGATCAGGAACGGTGAAGGACGA  | 0   | 15 | RDR2-sensitive |
| TGGATCATGTGGAAGACGACTGAC  | 0   | 20 | RDR2-sensitive |
| TGGATCCAAACACGTAGAGGGCTA  | 0   | 27 | RDR2-sensitive |
| TGGATCCACCAAGAACCACGGCAC  | 14  | 0  | RDR2-resistant |
| TGGATCCGATGACATACTGGCGAA  | 0   | 26 | RDR2-sensitive |
| TGGATCCGGAGGGCACTAGACCAG  | 0   | 9  | RDR2-sensitive |
| TGGATCCTATGTCTATATCGTCAT  | 19  | 0  | RDR2-resistant |
| TGGATCGAACTGCCCGAGCACGG   | 1   | 43 | RDR2-sensitive |
| TGGATCGACGTAGAGGCAGTGAGC  | 0   | 30 | RDR2-sensitive |
| TGGATCGAGAGCGGTGAAGGACGA  | 0   | 15 | RDR2-sensitive |
| TGGATCGGAAGCGGTAAAGGACAA  | 0   | 10 | RDR2-sensitive |
| TGGATCTAGACTGATACGACCTAA  | 0   | 14 | RDR2-sensitive |
| TGGATCTAGGTTTCATGAGATGGAT | 38  | 0  | RDR2-resistant |
| TGGATCTGATCCGGTTTTGTCTGTG | 112 | 3  | RDR2-resistant |
| TGGATCTGCAGAAGCACGCCGCAA  | 0   | 11 | RDR2-sensitive |
| TGGATCTGCAGAAGCATGCCGCAA  | 0   | 54 | RDR2-sensitive |
| TGGATCTGGACGAGGAACACACGG  | 0   | 9  | RDR2-sensitive |
| TGGATCTTAATCTTATCGTCAGAG  | 52  | 4  | RDR2-resistant |
| TGGATCTTCTCTGCAACAAGGCAA  | 0   | 9  | RDR2-sensitive |
| TGGATCTTGCATGACTGTTGGGTA  | 23  | 0  | RDR2-resistant |
| TGGATCTTTCTGGTGAAGAACAT   | 0   | 9  | RDR2-sensitive |
| TGGATCTTTGCTGAAGTGCTGGCT  | 32  | 1  | RDR2-resistant |
| TGGATGAACTGCTGGATACGGTCT  | 0   | 9  | RDR2-sensitive |
| TGGATGACAACTCAGATTTTCAGCA | 20  | 0  | RDR2-resistant |
| TGGATGAGAGGAGAGAGTGTGGAG  | 0   | 13 | RDR2-sensitive |
| TGGATGAGAGTCACGTAGGGACGA  | 0   | 19 | RDR2-sensitive |
| TGGATGAGGCAAACCCTGCGGGAC  | 19  | 1  | RDR2-resistant |
| TGGATGCAGAGACGTTCTGACCGA  | 0   | 12 | RDR2-sensitive |
| TGGATGCATGTGTAGATGACGGAG  | 0   | 17 | RDR2-sensitive |
| TGGATGCCTGTATCGGACGCGCAT  | 0   | 13 | RDR2-sensitive |
| TGGATGCGCACGGGACTTGGGCGG  | 0   | 11 | RDR2-sensitive |
| TGGATGCGTGGATGCGGGATAGAC  | 0   | 16 | RDR2-sensitive |
| TGGATGCTGGGAACTGCGGATGGA  | 0   | 12 | RDR2-sensitive |
| TGGATGGAAAATGGACGGCCAGAT  | 0   | 29 | RDR2-sensitive |
| TGGATGGACGGACGAGCAACGCAT  | 0   | 17 | RDR2-sensitive |
| TGGATGGACTAGCTCGAGCGGTGT  | 0   | 9  | RDR2-sensitive |
| TGGATGGACTGCCGACGCCAAGAC  | 0   | 11 | RDR2-sensitive |
| TGGATGGAGAAGAGGGAGGAGCAT  | 1   | 21 | RDR2-sensitive |
| TGGATGGCAAAGGGATAGGTGGAA  | 0   | 12 | RDR2-sensitive |
| TGGATGGCTCGGCCGTAGCGGCTA  | 50  | 0  | RDR2-resistant |
| TGGATGGTGTGAGCAGTTCGGAGA  | 17  | 0  | RDR2-resistant |
| TGGATGTAGATGGACGGTGTAGAT  | 0   | 27 | RDR2-sensitive |
| TGGATGTCAAGTCGGCGTTTCTTA  | 20  | 0  | RDR2-resistant |

|                           |     |     |                |
|---------------------------|-----|-----|----------------|
| TGGATGTCTGGCTGTCACCGGCCT  | 0   | 16  | RDR2-sensitive |
| TGGATGTGAGTGTGACAAGCAGG   | 25  | 0   | RDR2-resistant |
| TGGATGTGAGTTGGGCCAGGCCAG  | 0   | 9   | RDR2-sensitive |
| TGGATGTGATAGCTCAATCCAGGA  | 27  | 2   | RDR2-resistant |
| TGGATGTGCGGATGCGAGATAGAT  | 0   | 12  | RDR2-sensitive |
| TGGATGTGGAGGATGTGGTCTGGA  | 0   | 14  | RDR2-sensitive |
| TGGATGTTCATGAGATGGGACCAA  | 15  | 0   | RDR2-resistant |
| TGGATGTTTGAGACTCAGACGGTC  | 0   | 9   | RDR2-sensitive |
| TGGATGTTTTTGACGACGGCAGCC  | 39  | 0   | RDR2-resistant |
| TGGATTAGTTGGAGGGCGATCAAT  | 19  | 0   | RDR2-resistant |
| TGGATTATACTCTGCAGAGGTT    | 16  | 0   | RDR2-resistant |
| TGGATTCATCCGAAGATTTGTCGG  | 47  | 5   | RDR2-resistant |
| TGGATTCTGGCTGTTGACTGCAT   | 0   | 39  | RDR2-sensitive |
| TGGATTCTGGCTGTTGACTGCCT   | 0   | 10  | RDR2-sensitive |
| TGGATTCGGATAGGAAACAGGCAC  | 2   | 31  | RDR2-sensitive |
| TGGATTCGGGACCGGATACGGATA  | 0   | 23  | RDR2-sensitive |
| TGGATTCGTGATTGGCGATGGGGA  | 22  | 0   | RDR2-resistant |
| TGGATTCTGACTTAGAGGCGTTCA  | 18  | 0   | RDR2-resistant |
| TGGATTCTGGTAGTTCAAGACGGT  | 83  | 7   | RDR2-resistant |
| TGGATTCTTGGCTGTCGACTGCAT  | 0   | 18  | RDR2-sensitive |
| TGGATTGAAGCCTCGGACGACGGA  | 0   | 10  | RDR2-sensitive |
| TGGATTGAGTGGGATTGGATGGGT  | 3   | 41  | RDR2-sensitive |
| TGGATTGCTGACAGGTTGGCTAAA  | 90  | 7   | RDR2-resistant |
| TGGATTGGAGGGGATTGATACGGA  | 0   | 28  | RDR2-sensitive |
| TGGATTGGAGTGGATTGAGATGGT  | 0   | 11  | RDR2-sensitive |
| TGGATTGGAGTGGATTGAGGTGGT  | 1   | 42  | RDR2-sensitive |
| TGGATTGGCGAGATGGCGAACGAC  | 0   | 10  | RDR2-sensitive |
| TGGATTGGGACATCAACACGGCAC  | 3   | 31  | RDR2-sensitive |
| TGGATTGGTGGGAGGAAGAAGGAA  | 81  | 0   | RDR2-resistant |
| TGGATTGGTTCGGTAGACACGGTC  | 0   | 21  | RDR2-sensitive |
| TGGATTGTGGCCGGGCTACAACAA  | 0   | 12  | RDR2-sensitive |
| TGGATTGTTATTCAGGCTATCATC  | 187 | 58  | RDR2-resistant |
| TGGATTGTTTCTACATGGTTTAGC  | 15  | 0   | RDR2-resistant |
| TGGATTTGAGGGGAAGGGGACGAC  | 180 | 13  | RDR2-resistant |
| TGGATTTTGATTGGATGCACTGCA  | 44  | 0   | RDR2-resistant |
| TGGCAAAGACTATTTTATACTCGT  | 0   | 9   | RDR2-sensitive |
| TGGCAAAGGGATAGGTGGAACCAA  | 0   | 14  | RDR2-sensitive |
| TGGCAAAGTGGACGGAACGGCGT   | 0   | 12  | RDR2-sensitive |
| TGGCAAAGGACAGCACCAAGGACGC | 0   | 17  | RDR2-sensitive |
| TGGCAAAGTTCGGATAGGGACGGCT | 0   | 13  | RDR2-sensitive |
| TGGCAATGTGGCTGGCATGACTGA  | 14  | 0   | RDR2-resistant |
| TGGCAATTGTAGGCGTGGCATCCA  | 0   | 9   | RDR2-sensitive |
| TGGCACAAAATCAGTTATCGTCGT  | 15  | 0   | RDR2-resistant |
| TGGCACAAACGGACGTCGTGGCAC  | 0   | 14  | RDR2-sensitive |
| TGGCACAAAGTCAGTTATCGTCGT  | 77  | 105 | RDR2-sensitive |
| TGGCACAATCTGTACAGTCGTCTGA | 0   | 12  | RDR2-sensitive |
| TGGCACAATCTGTACAGTCGTCTGC | 0   | 17  | RDR2-sensitive |
| TGGCACACGAACTTCGCTGGCAT   | 0   | 9   | RDR2-sensitive |
| TGGCACCTACACGACGGACGACGT  | 0   | 10  | RDR2-sensitive |

|                           |     |    |                |
|---------------------------|-----|----|----------------|
| TGGCACGCGGACACGGTGAGGCAC  | 0   | 16 | RDR2-sensitive |
| TGGCACGGACCCGATGAATGACGG  | 0   | 9  | RDR2-sensitive |
| TGGCACGGTAGAATAAGCGGGCGG  | 0   | 48 | RDR2-sensitive |
| TGGCACTATTGTTGGGCTGCCGGC  | 0   | 32 | RDR2-sensitive |
| TGGCACTCGGCAAAGACTGACGGC  | 2   | 21 | RDR2-sensitive |
| TGGCACTGCAGACTGAGAAGGCGT  | 0   | 12 | RDR2-sensitive |
| TGGCACTGCAGTCGGAGTGGCGCA  | 12  | 47 | RDR2-sensitive |
| TGGCAGAACACGGAATGACAGCCT  | 1   | 16 | RDR2-sensitive |
| TGGCAGAACACTGGCAGAACACGG  | 0   | 14 | RDR2-sensitive |
| TGGCAGATCTGCGACCCGGGGCTGC | 0   | 16 | RDR2-sensitive |
| TGGCAGCTGTTGGATTGCGATCGG  | 0   | 11 | RDR2-sensitive |
| TGGCAGGATGCATTGAGGATACT   | 252 | 2  | RDR2-resistant |
| TGGCAGGGATAGACTGGCTGGCAC  | 0   | 9  | RDR2-sensitive |
| TGGCAGTCCGTAGCAGCTTTTGGT  | 0   | 9  | RDR2-sensitive |
| TGGCAGTCTGCAGCAGCTTTTGGT  | 0   | 21 | RDR2-sensitive |
| TGGCAGTGCAGACAGCGACGAACGC | 17  | 1  | RDR2-resistant |
| TGGCATAACTCGGCTAGAGCTGGC  | 1   | 22 | RDR2-sensitive |
| TGGCATATGTGTAGATGACTTGAT  | 15  | 0  | RDR2-resistant |
| TGGCATCGATCGTGCCGGGCCTGC  | 0   | 9  | RDR2-sensitive |
| TGGCATGACTGGCACTGTACCCAA  | 41  | 11 | RDR2-resistant |
| TGGCATGATCCTGACGGAAGACGA  | 0   | 11 | RDR2-sensitive |
| TGGCATGGACCCAGTGGACAACGG  | 0   | 19 | RDR2-sensitive |
| TGGCATGGTTTGTCTGGTCATAAGA | 40  | 0  | RDR2-resistant |
| TGGCATGTTTGTCTTCTTCGTCGC  | 89  | 0  | RDR2-resistant |
| TGGCATGTTTGTCTTCTTCGTCGC  | 169 | 20 | RDR2-resistant |
| TGGCATTGAAGGGGACTGGTCCGT  | 0   | 15 | RDR2-sensitive |
| TGGCATTGCAGTAGACCGGAATAA  | 0   | 13 | RDR2-sensitive |
| TGGCCAACGGTTCGGAAGGAGGCAC | 1   | 13 | RDR2-sensitive |
| TGGCCAACTGAAGGAGAACGAGCA  | 0   | 11 | RDR2-sensitive |
| TGGCCAAGCCGACGCTGAATCAGT  | 101 | 0  | RDR2-resistant |
| TGGCCACCAAAAAGCTGCTGCGGAC | 1   | 14 | RDR2-sensitive |
| TGGCCACCAAAAAGCTGTTGCGGAC | 0   | 16 | RDR2-sensitive |
| TGGCCACGAGTCGAGCGAGCTCAC  | 0   | 9  | RDR2-sensitive |
| TGGCCAGGAAGGACCCTGAGGCAT  | 0   | 17 | RDR2-sensitive |
| TGGCCAGGAGGAGGTAGCGCGGGA  | 20  | 2  | RDR2-resistant |
| TGGCCAGTCTGACAGAAGGACAGC  | 3   | 34 | RDR2-sensitive |
| TGGCCATGCATGAACATCACCGAA  | 0   | 9  | RDR2-sensitive |
| TGGCCCAAACGGACGACGTGGCGC  | 0   | 11 | RDR2-sensitive |
| TGGCCCAAAGACAGTACGAATGCAT | 0   | 16 | RDR2-sensitive |
| TGGCCCACATGTCAGAAGCTCCAA  | 0   | 16 | RDR2-sensitive |
| TGGCCCGAACCAACAGTAGAACGG  | 0   | 48 | RDR2-sensitive |
| TGGCCCGAACCAACAGTAGAGCAG  | 0   | 20 | RDR2-sensitive |
| TGGCCCGTGGGCCGTCGGACGACA  | 34  | 5  | RDR2-resistant |
| TGGCCCTGGCTGACTCGATACGGC  | 0   | 14 | RDR2-sensitive |
| TGGCCCTGGCTGATCTGATACGGC  | 0   | 12 | RDR2-sensitive |
| TGGCCCTTACTGAAACCGGATCGA  | 20  | 0  | RDR2-resistant |
| TGGCCGAACTGTCTGCGATGGCAC  | 0   | 43 | RDR2-sensitive |
| TGGCCGACTCATGGCATAACTCGG  | 0   | 10 | RDR2-sensitive |
| TGGCCGACTCTTGGCGTGACTCGG  | 1   | 14 | RDR2-sensitive |

|                            |    |    |                |
|----------------------------|----|----|----------------|
| TGGCCGCTCTCGGGAATTCGTCGG   | 0  | 10 | RDR2-sensitive |
| TGGCCGGAAGGACGGAGAGACCAT   | 0  | 11 | RDR2-sensitive |
| TGGCCGGACGGTCTGCGCCTACGC   | 0  | 15 | RDR2-sensitive |
| TGGCCTATGAACCGGATCTTCGTG   | 18 | 0  | RDR2-resistant |
| TGGCCTCTGTACAGCATTGAGCAT   | 0  | 15 | RDR2-sensitive |
| TGGCCTGACACGGATACATGACAT   | 0  | 14 | RDR2-sensitive |
| TGGCCTGCTTCAGACGACTCGAAC   | 0  | 21 | RDR2-sensitive |
| TGGCCTGGCTACGAAGCGTGCTGT   | 0  | 13 | RDR2-sensitive |
| TGGCCTGTTGGCTCGACCGTCTGC   | 93 | 3  | RDR2-resistant |
| TGGCCTTAAATTCTAGCCTGTCGG   | 0  | 12 | RDR2-sensitive |
| TGGCCTTAATCCCTATCTCGTCGT   | 0  | 30 | RDR2-sensitive |
| TGGCGAAAACACTGCAGATGGGCATT | 1  | 13 | RDR2-sensitive |
| TGGCGAAAGAGACTCGGCTCGGCT   | 0  | 9  | RDR2-sensitive |
| TGGCGAAAGAGGCTCGGCTCGGCT   | 1  | 20 | RDR2-sensitive |
| TGGCGAAGACTGGGCCTCGGGCGA   | 0  | 19 | RDR2-sensitive |
| TGGCGACGGACGGCGTAAGTACAA   | 0  | 28 | RDR2-sensitive |
| TGGCGACGGGCGGCGTGAGTACAA   | 0  | 12 | RDR2-sensitive |
| TGGCGAGATAGAAAGGTTCCGGCTA  | 0  | 10 | RDR2-sensitive |
| TGGCGAGATCGAGCGGTAGGCCAG   | 0  | 9  | RDR2-sensitive |
| TGGCGAGCGAAGCGGAGGCCCGTC   | 0  | 13 | RDR2-sensitive |
| TGGCGAGCGTGACCGACGAGCTAA   | 2  | 19 | RDR2-sensitive |
| TGGCGAGTTGTAGAGCACGATGGC   | 0  | 17 | RDR2-sensitive |
| TGGCGATCTGCAGCAGCTTTTGGT   | 0  | 18 | RDR2-sensitive |
| TGGCGATGAACGGCGTAAGTACAA   | 0  | 9  | RDR2-sensitive |
| TGGCGATGATGGAGCAGGTGACAC   | 1  | 20 | RDR2-sensitive |
| TGGCGATGGTGGGCTTTAGACGGA   | 0  | 10 | RDR2-sensitive |
| TGGCGATTGTGGGCTTTAGGCGGA   | 0  | 16 | RDR2-sensitive |
| TGGCGCAATCTGTACAATCGTCGT   | 0  | 22 | RDR2-sensitive |
| TGGCGCAATCTGTACAGTCGTCGG   | 0  | 14 | RDR2-sensitive |
| TGGCGCAATCTGTAGAGTCGTCGG   | 0  | 14 | RDR2-sensitive |
| TGGCGCAGAGCTAGATTGTCACGT   | 0  | 18 | RDR2-sensitive |
| TGGCGCCTCGGGCTTGCTCGTCGT   | 0  | 10 | RDR2-sensitive |
| TGGCGCCTGAGAAATCCATGGTCGT  | 0  | 13 | RDR2-sensitive |
| TGGCGCCTGTAGCAGTCGACCGTT   | 12 | 29 | RDR2-sensitive |
| TGGCGCTCGGCAAAGACTGACGGC   | 0  | 14 | RDR2-sensitive |
| TGGCGGAAGTAGACAGGGGACCAG   | 0  | 16 | RDR2-sensitive |
| TGGCGGAGCCAGCTCGAAATCAGA   | 20 | 0  | RDR2-resistant |
| TGGCGGATCAGTAGAGGATGTCAG   | 0  | 26 | RDR2-sensitive |
| TGGCGGATGATACAGAAGAGACGA   | 0  | 16 | RDR2-sensitive |
| TGGCGGATTGCGCGAGACAGTGTA   | 0  | 10 | RDR2-sensitive |
| TGGCGGCAGAACGGCAGAACACAT   | 0  | 15 | RDR2-sensitive |
| TGGCGGCGTCCTCGTCGGAGGAGT   | 61 | 3  | RDR2-resistant |
| TGGCGGCTGAAGCGAGGACGACGT   | 0  | 10 | RDR2-sensitive |
| TGGCGGGCTGGGTCCAAAACGGGT   | 0  | 11 | RDR2-sensitive |
| TGGCGGGTGGTAGGTAGTAGTGGT   | 18 | 0  | RDR2-resistant |
| TGGCGGTACCTCTGCGACGGTGT    | 0  | 46 | RDR2-sensitive |
| TGGCGGTGCTCTCTGGTCAGACGC   | 1  | 16 | RDR2-sensitive |
| TGGCGTAATATGTACAGTCGTCGG   | 0  | 28 | RDR2-sensitive |
| TGGCGTAATCTGTACAGTCGTCGG   | 0  | 29 | RDR2-sensitive |

|                            |     |     |                |
|----------------------------|-----|-----|----------------|
| TGGCGTAGGACATGACGAGGCCAG   | 1   | 15  | RDR2-sensitive |
| TGGCGTATGTGCGTAGATTGTCGT   | 0   | 9   | RDR2-sensitive |
| TGGCGTCAAAGTCGGCTTCCCTAG   | 14  | 0   | RDR2-resistant |
| TGGCGTCACTGTAGGATGGATGGA   | 0   | 12  | RDR2-sensitive |
| TGGCGTCTCGAGACATACTGACGG   | 0   | 20  | RDR2-sensitive |
| TGGCGTGA CT CGGCAAGAGCTGGC | 0   | 26  | RDR2-sensitive |
| TGGCGTGA CT CGGCGAGAGCTGGC | 1   | 18  | RDR2-sensitive |
| TGGCGTGA GTAGAGATGGGAACAC  | 0   | 27  | RDR2-sensitive |
| TGGCGTGCTGTA ACTGAAACCGGC  | 0   | 10  | RDR2-sensitive |
| TGGCGTGGGTGTGTAGGGACGCGC   | 0   | 9   | RDR2-sensitive |
| TGGCGTGT TTTCTGTTGGACGACGG | 0   | 9   | RDR2-sensitive |
| TGGCGTTGGTCTCCTGGGCACGGA   | 504 | 76  | RDR2-resistant |
| TGGCGTTTCTGTAGATGGGCCCGC   | 0   | 71  | RDR2-sensitive |
| TGGCGTTTCTTGTAGATGTAGCAT   | 59  | 6   | RDR2-resistant |
| TGGCTACGCGGAGGGCTCGAAGGC   | 38  | 2   | RDR2-resistant |
| TGGCTACTGTAGCCCACGGGCCGG   | 0   | 16  | RDR2-sensitive |
| TGGCTACTGTAGTTCACGGGCCGG   | 2   | 142 | RDR2-sensitive |
| TGGCTAGACTGGAGGCGACGACGG   | 0   | 23  | RDR2-sensitive |
| TGGCTAGCTCGGCTCGGCTCGGAT   | 0   | 27  | RDR2-sensitive |
| TGGCTAGGCTCGTTGGCTCGGCGA   | 0   | 22  | RDR2-sensitive |
| TGGCTAGGTGTGCGGGCGCGGGT    | 0   | 9   | RDR2-sensitive |
| TGGCTATAAAACAGA ACTGGCATG  | 23  | 0   | RDR2-resistant |
| TGGCTATAAGGTTCGGATGGTACGT  | 0   | 13  | RDR2-sensitive |
| TGGCTATGCGGAGGGCTCGAAGGC   | 14  | 0   | RDR2-resistant |
| TGGCTCAACTTGCTAGTTCGTCGT   | 1   | 13  | RDR2-sensitive |
| TGGCTCAGCGTTAGGACCGGGCAT   | 0   | 9   | RDR2-sensitive |
| TGGCTCCCGAGACACTGAGACGAC   | 0   | 12  | RDR2-sensitive |
| TGGCTCCGCCTCTGATAGCATGAA   | 23  | 1   | RDR2-resistant |
| TGGCTCCTGGTGTGCTAATGTCGT   | 83  | 0   | RDR2-resistant |
| TGGCTCGAACTCAGAGCAGCTCGG   | 0   | 13  | RDR2-sensitive |
| TGGCTCGGACCTGGCACATAGGTT   | 1   | 30  | RDR2-sensitive |
| TGGCTCGGACCTGGCGCGTAGGTT   | 0   | 14  | RDR2-sensitive |
| TGGCTCGGCACGGCACAGACCTAC   | 1   | 15  | RDR2-sensitive |
| TGGCTCGGCATAGATCTAGCACGG   | 0   | 21  | RDR2-sensitive |
| TGGCTCGGCTCGGCTCGGAGCGGC   | 0   | 9   | RDR2-sensitive |
| TGGCTCTCGGCAAAGACTGACGAC   | 0   | 30  | RDR2-sensitive |
| TGGCTCTCGGCAAAGACTGACGGC   | 12  | 286 | RDR2-sensitive |
| TGGCTCTCGGCAAAGACTGACGGT   | 0   | 24  | RDR2-sensitive |
| TGGCTCTCGGTA AAGACTGACGGC  | 1   | 15  | RDR2-sensitive |
| TGGCTCTGACCGGTCTGCTGCAGT   | 45  | 0   | RDR2-resistant |
| TGGCTCTTGCAAGCATTAGATCGT   | 0   | 9   | RDR2-sensitive |
| TGGCTCTTGCAAGCATTAGGTCGT   | 5   | 73  | RDR2-sensitive |
| TGGCTCTTGTAAGCATTAGGTCGT   | 0   | 9   | RDR2-sensitive |
| TGGCTGAAAAGTGTGGCGCGGTGT   | 0   | 10  | RDR2-sensitive |
| TGGCTGAAGGCAGA ACCAGGGGAG  | 0   | 34  | RDR2-sensitive |
| TGGCTGACATGACCCAGACTCGGC   | 0   | 9   | RDR2-sensitive |
| TGGCTGAGAATTGGGCTACATCGT   | 0   | 10  | RDR2-sensitive |
| TGGCTGAGCGCGGGGTGTTCCGGT   | 32  | 2   | RDR2-resistant |
| TGGCTGAGTAGAAACACGGGGTTC   | 0   | 12  | RDR2-sensitive |



|                           |     |    |                |
|---------------------------|-----|----|----------------|
| TGGCTGCATCCACTCATACGGCAA  | 0   | 9  | RDR2-sensitive |
| TGGCTGCGTGAACAAGATACGGCG  | 0   | 10 | RDR2-sensitive |
| TGGCTGCTCTCGGGACTTCGACGG  | 5   | 50 | RDR2-sensitive |
| TGGCTGCTGGCTCCACGACGACAT  | 0   | 23 | RDR2-sensitive |
| TGGCTGGAGATCGTATAAGGGCAT  | 0   | 11 | RDR2-sensitive |
| TGGCTGGAGGCGTCTGCTCGATGG  | 3   | 19 | RDR2-sensitive |
| TGGCTGGATGTAGGTTAATAGCAT  | 0   | 18 | RDR2-sensitive |
| TGGCTGGGTTGTCTGTTTCGATGGC | 1   | 17 | RDR2-sensitive |
| TGGCTGTAAGCGCGCGGAATGCGG  | 0   | 10 | RDR2-sensitive |
| TGGCTGTACGGCAACCAAACACAC  | 0   | 13 | RDR2-sensitive |
| TGGCTGTAGAAAAAAGCTGGCTGT  | 0   | 9  | RDR2-sensitive |
| TGGCTGTAGAGAAAAGCTGGCTGT  | 0   | 9  | RDR2-sensitive |
| TGGCTGTAGAGAGAAGTTGGCTGA  | 0   | 27 | RDR2-sensitive |
| TGGCTGTAGCTTGCAGGACGGGGT  | 0   | 9  | RDR2-sensitive |
| TGGCTGTAGGGAGAATCCGGCTGT  | 0   | 46 | RDR2-sensitive |
| TGGCTGTATAAGGAAGACCCGACC  | 0   | 11 | RDR2-sensitive |
| TGGCTGTATCGTCCGCATCACCGC  | 0   | 18 | RDR2-sensitive |
| TGGCTGTCAGTGTCTCCATGGCTA  | 16  | 0  | RDR2-resistant |
| TGGCTGTGAGGAGAATCTGGCTGT  | 0   | 10 | RDR2-sensitive |
| TGGCTGTGCTCTCTACGGAGACGT  | 1   | 14 | RDR2-sensitive |
| TGGCTGTGCTCTCTGTCGACGAGC  | 1   | 29 | RDR2-sensitive |
| TGGCTGTGCTGACGATACTGCTGC  | 0   | 12 | RDR2-sensitive |
| TGGCTGTGGAAACGGTAAGCTGAT  | 5   | 54 | RDR2-sensitive |
| TGGCTGTGGACTGCAATCTCCGGC  | 253 | 37 | RDR2-resistant |
| TGGCTGTGGGGAAAAGCTGGCTGT  | 0   | 31 | RDR2-sensitive |
| TGGCTGTGGTACGTGGGCTGGCAC  | 0   | 10 | RDR2-sensitive |
| TGGCTGTTGACTGCATGGCTGCGC  | 0   | 13 | RDR2-sensitive |
| TGGCTGTTTTAAGTGCGGTGAGCT  | 81  | 4  | RDR2-resistant |
| TGGCTTAGTACGGCCCCGAACGCGC | 0   | 35 | RDR2-sensitive |
| TGGCTTATGGACAGGTACCTTCAG  | 0   | 12 | RDR2-sensitive |
| TGGCTTCCCTGGCTCTTTGACGGT  | 0   | 13 | RDR2-sensitive |
| TGGCTTCGTCATCTGGTTCGCTGGG | 22  | 1  | RDR2-resistant |
| TGGCTTCTCTGGCTCTGTGACGGT  | 0   | 21 | RDR2-sensitive |
| TGGCTTGTTTAGCTCGAGAGTCAG  | 0   | 10 | RDR2-sensitive |
| TGGGAACTGCTGTCTGGAGCGCAT  | 0   | 10 | RDR2-sensitive |
| TGGGAACCTGTCTGTTTCGATGGCG | 1   | 14 | RDR2-sensitive |
| TGGGAACTGCGGATGGATGCGGAT  | 0   | 10 | RDR2-sensitive |
| TGGGAACTGTGGACGCCTACGGTA  | 0   | 30 | RDR2-sensitive |
| TGGGAACTGTTCTCGAGTGTGCAT  | 1   | 15 | RDR2-sensitive |
| TGGGAATGAGAATGGCAGAACCAG  | 0   | 9  | RDR2-sensitive |
| TGGGAATGGCAGAACACGGAATGA  | 0   | 16 | RDR2-sensitive |
| TGGGAATGGCAGAACACGGAATGG  | 3   | 16 | RDR2-sensitive |
| TGGGAATGGGAATGGCAGAACCAG  | 0   | 28 | RDR2-sensitive |
| TGGGAATTTGGTGGGGGCGAGCGG  | 0   | 12 | RDR2-sensitive |
| TGGGACAAAGGACCATAACAACCAC | 0   | 11 | RDR2-sensitive |
| TGGGACAACAGAGAACATACCCAC  | 0   | 17 | RDR2-sensitive |
| TGGGACAAGGCATGACACAGATAA  | 0   | 42 | RDR2-sensitive |
| TGGGACAATCTGTACAGTCGTCGG  | 0   | 9  | RDR2-sensitive |
| TGGGACACGCAGCGACAATTTACT  | 0   | 11 | RDR2-sensitive |

|                            |     |    |                |
|----------------------------|-----|----|----------------|
| TGGGACACGCATAACGAGACGCTA   | 0   | 9  | RDR2-sensitive |
| TGGGACACGCGGCGACAATTTACT   | 0   | 10 | RDR2-sensitive |
| TGGGACACGCGTATGACAGAGCAT   | 1   | 28 | RDR2-sensitive |
| TGGGACACTCGACAAAGACGCCGT   | 0   | 10 | RDR2-sensitive |
| TGGGACAGAACGGCTCCGTTCTAC   | 0   | 11 | RDR2-sensitive |
| TGGGACAGAGATCAGGCACAACGT   | 0   | 21 | RDR2-sensitive |
| TGGGACAGTGGACGGCCGAAGCAG   | 1   | 12 | RDR2-sensitive |
| TGGGACATGATGAAGGTGGAGGAG   | 24  | 2  | RDR2-resistant |
| TGGGACCAGATATCAGAGGCACAA   | 0   | 10 | RDR2-sensitive |
| TGGGACCAGTGGAAGCGGACGCAT   | 21  | 0  | RDR2-resistant |
| TGGGACCAGTGGCATAACAAGGAAT  | 0   | 11 | RDR2-sensitive |
| TGGGACCCAAGAGGCATCCTGCGG   | 0   | 11 | RDR2-sensitive |
| TGGGACCCACAGAAGAGTGTGAAC   | 0   | 13 | RDR2-sensitive |
| TGGGACCCTTACGTTGGACAGCAA   | 0   | 9  | RDR2-sensitive |
| TGGGACCCGCTGCATGCAAGGACG   | 0   | 21 | RDR2-sensitive |
| TGGGACCTCAAGAACTACCGGCAC   | 0   | 9  | RDR2-sensitive |
| TGGGACCTCAAGAACTACCGGCAG   | 0   | 11 | RDR2-sensitive |
| TGGGACCTGCTTCTTGACTTGCC    | 15  | 0  | RDR2-resistant |
| TGGGACCTTCGAAGCTGCCGGCAA   | 4   | 22 | RDR2-sensitive |
| TGGGACGATGGACGTTGTTGACGT   | 1   | 14 | RDR2-sensitive |
| TGGGACGGTTGGCTCGGACCTGGC   | 1   | 14 | RDR2-sensitive |
| TGGGACGTGAGCCTGGCTGACGAC   | 15  | 33 | RDR2-sensitive |
| TGGGACGTTACTGAGTGGACGGTT   | 0   | 10 | RDR2-sensitive |
| TGGGACTAAAGCCGAGGCACTGAC   | 0   | 17 | RDR2-sensitive |
| TGGGACTAAAGCCGGGGCGCTGAC   | 2   | 20 | RDR2-sensitive |
| TGGGACTACACGAGCATGCATTAT   | 15  | 0  | RDR2-resistant |
| TGGGACTCGACGAGCTGGGCAGAG   | 0   | 22 | RDR2-sensitive |
| TGGGACTGAACGAGGACGCGCCGT   | 0   | 29 | RDR2-sensitive |
| TGGGACTGACGGGGTAACGGTGT    | 0   | 9  | RDR2-sensitive |
| TGGGACTGGGAGAGGCAAAGCCGG   | 0   | 16 | RDR2-sensitive |
| TGGGACTTCTGCCTGACGGCCGGA   | 0   | 18 | RDR2-sensitive |
| TGGGACTTGACTGAGGGACCGGAG   | 0   | 15 | RDR2-sensitive |
| TGGGACTTTGCTCAGATTGTAGCC   | 81  | 17 | RDR2-resistant |
| TGGGAGAATCTGACTGTGAGGAGA   | 0   | 10 | RDR2-sensitive |
| TGGGAGACGACGGCCTAGACCACT   | 0   | 9  | RDR2-sensitive |
| TGGGAGACGACGGCCTAGACCTCT   | 0   | 14 | RDR2-sensitive |
| TGGGAGCAAGTGAATGAAGGGTA    | 2   | 20 | RDR2-sensitive |
| TGGGAGCCAGTGGAGGGATGACGC   | 0   | 16 | RDR2-sensitive |
| TGGGAGCGGCTGGGAGCAGAGGAG   | 128 | 10 | RDR2-resistant |
| TGGGAGCGGGAGCGGAACAACACTAC | 0   | 19 | RDR2-sensitive |
| TGGGAGCTCTCTGTTTCGATGGCGC  | 0   | 10 | RDR2-sensitive |
| TGGGAGGAGGGCCGAGGGCGGGTG   | 50  | 1  | RDR2-resistant |
| TGGGAGGCAGAACCGTGCACCACA   | 0   | 18 | RDR2-sensitive |
| TGGGAGGCAGAACGGCAGAACGGC   | 0   | 10 | RDR2-sensitive |
| TGGGAGGCAGAACGGCAGAATGAT   | 0   | 19 | RDR2-sensitive |
| TGGGAGGCTGTAGTGAGGCTTCAT   | 0   | 30 | RDR2-sensitive |
| TGGGAGGGCAGATTGGCAGAACAA   | 31  | 4  | RDR2-resistant |
| TGGGAGGGTCCACACTGATCTCGG   | 0   | 9  | RDR2-sensitive |
| TGGGAGGTTCAGGACTGCCACGTC   | 0   | 16 | RDR2-sensitive |

|                          |     |    |                |
|--------------------------|-----|----|----------------|
| TGGGAGTCTTTGGCTTGTACGGAG | 44  | 4  | RDR2-resistant |
| TGGGAGTGGGAGGCAGAACCGTGC | 0   | 12 | RDR2-sensitive |
| TGGGAGTTCGCGAGGTCTGGCGTG | 20  | 0  | RDR2-resistant |
| TGGGATCAATGGCACACAAGGAAC | 0   | 12 | RDR2-sensitive |
| TGGGATGAATTGGAGGCTGGCTGC | 0   | 11 | RDR2-sensitive |
| TGGGATGACGCTTAGGACGAGCAT | 0   | 14 | RDR2-sensitive |
| TGGGATGGGAACTCACCGGCAACC | 1   | 14 | RDR2-sensitive |
| TGGGATGTAGAGGAGTTGATGCGC | 0   | 9  | RDR2-sensitive |
| TGGGATGTTGTTGAGTATGGTGTA | 24  | 3  | RDR2-resistant |
| TGGGATTCTGTGGTTCGTGGTGGT | 25  | 0  | RDR2-resistant |
| TGGGATTGATCTCTACACTGAAGA | 47  | 5  | RDR2-resistant |
| TGGGATTGCGGCATTTTTCTCTAT | 17  | 0  | RDR2-resistant |
| TGGGATTGGGCTGTGCAGGGTGTT | 22  | 0  | RDR2-resistant |
| TGGGATTGTGCGTAGGAGCGGTGT | 17  | 0  | RDR2-resistant |
| TGGGCAAACGACGGTATCTGACT  | 15  | 0  | RDR2-resistant |
| TGGGCACCTAAGAAGGAACACGAC | 0   | 21 | RDR2-sensitive |
| TGGGCACCTATAGACTCAGGGCAT | 1   | 13 | RDR2-sensitive |
| TGGGCACGACACAGTACGGCTGAA | 0   | 15 | RDR2-sensitive |
| TGGGCACTATGCGGACTAGGTCAT | 0   | 11 | RDR2-sensitive |
| TGGGCACTCGGCAAAGAAGACTTT | 0   | 13 | RDR2-sensitive |
| TGGGCAGAACGGGTTGGATCACAT | 0   | 16 | RDR2-sensitive |
| TGGGCAGCAGCTAGGAGCAGGGGA | 672 | 15 | RDR2-resistant |
| TGGGCAGCAGCTAGGAGCAGGGGC | 15  | 0  | RDR2-resistant |
| TGGGCAGCAGCTAGGAGCAGGGGG | 14  | 0  | RDR2-resistant |
| TGGGCAGGAGGAGGTGCTGGGGAA | 14  | 0  | RDR2-resistant |
| TGGGCAGGCCTTGTTGAGACTGGT | 35  | 6  | RDR2-resistant |
| TGGGCAGGTATGGTATGACTTCTT | 0   | 19 | RDR2-sensitive |
| TGGGCAGTGAACGAGCGTCACCGG | 0   | 15 | RDR2-sensitive |
| TGGGCATAAGACTGACGACGGAAC | 0   | 12 | RDR2-sensitive |
| TGGGCATAAGAGGAAGGAGGACGC | 3   | 88 | RDR2-sensitive |
| TGGGCATAGAAAGACACTCGGCAA | 0   | 11 | RDR2-sensitive |
| TGGGCATCTTAGACGAAGGACGGT | 0   | 24 | RDR2-sensitive |
| TGGGCATGTATTGACCGGTATCAC | 0   | 10 | RDR2-sensitive |
| TGGGCCACGTAGACAGCATCGCAG | 1   | 14 | RDR2-sensitive |
| TGGGCCATTGTAGAGTGGACGGTT | 0   | 29 | RDR2-sensitive |
| TGGGCCAAAGACGAATGTACCAA  | 0   | 50 | RDR2-sensitive |
| TGGGCCGAATCCTGTTCCGCGGTT | 0   | 9  | RDR2-sensitive |
| TGGGCCGAGCACTGGCACATGCAT | 0   | 11 | RDR2-sensitive |
| TGGGCCGCGAACCAAGCACGCCGT | 0   | 44 | RDR2-sensitive |
| TGGGCCGGCAGGGTACAAGCTCAT | 0   | 11 | RDR2-sensitive |
| TGGGCCGGCTTCTGCGCGACACGC | 0   | 17 | RDR2-sensitive |
| TGGGCCGTGCTAGATCTGTGTCGT | 32  | 0  | RDR2-resistant |
| TGGGCCGTGCTCTGGTTGGCGGCT | 0   | 18 | RDR2-sensitive |
| TGGGCCGTTGAGCCGAGATCGGAC | 15  | 0  | RDR2-resistant |
| TGGGCCGTTGCAGAGTGAACAGTT | 0   | 14 | RDR2-sensitive |
| TGGGCCGTTGCAGAGTGGACAGTT | 1   | 42 | RDR2-sensitive |
| TGGGCCGTTGTAGAGTGGACGGTG | 1   | 15 | RDR2-sensitive |
| TGGGCCTCTAGGCGAGATGGACAC | 0   | 9  | RDR2-sensitive |
| TGGGCCTCTGAATCAGTGGTTGGA | 28  | 3  | RDR2-resistant |

|                          |     |    |                |
|--------------------------|-----|----|----------------|
| TGGGCCTTGGGACTGAACGAGGAC | 1   | 19 | RDR2-sensitive |
| TGGGCGAACCAGAAGATCTCCAGA | 0   | 10 | RDR2-sensitive |
| TGGGCGACGAATGGAAGGACACGG | 0   | 9  | RDR2-sensitive |
| TGGGCGACGGAGGAAACAGAGCAT | 0   | 13 | RDR2-sensitive |
| TGGGCGAGAGTAGTACTAGGATGG | 20  | 40 | RDR2-sensitive |
| TGGGCGCAGGACAACACGAAGGCC | 1   | 22 | RDR2-sensitive |
| TGGGCGCCTAGAGGAGGCTTCTGA | 0   | 9  | RDR2-sensitive |
| TGGGCGCGGGACAAACACGAAGGC | 2   | 25 | RDR2-sensitive |
| TGGGCGCGGGACGAACACGAAGGC | 32  | 94 | RDR2-sensitive |
| TGGGCGCGTGAGTGAGTCCGGCGT | 0   | 9  | RDR2-sensitive |
| TGGGCGCTGTAGGGGCACCGCTGC | 0   | 25 | RDR2-sensitive |
| TGGGCGGAGACAGGACGAAAGAAA | 0   | 13 | RDR2-sensitive |
| TGGGCGGATCCCTGATGCAGTGGC | 109 | 13 | RDR2-resistant |
| TGGGCGGGCCCTGAGTGTAGAGGA | 0   | 20 | RDR2-sensitive |
| TGGGCGTGTACTTATCATGGCATA | 19  | 0  | RDR2-resistant |
| TGGGCGTGTAGAGGACGTGTCTGA | 0   | 41 | RDR2-sensitive |
| TGGGCTAACGACGACGGATCAGAG | 44  | 5  | RDR2-resistant |
| TGGGCTAGCACGGCCTGAAGTCGG | 0   | 63 | RDR2-sensitive |
| TGGGCTAGCTCGCTCAGTAACGGT | 0   | 14 | RDR2-sensitive |
| TGGGCTATAAAAGGGAGGACACAT | 0   | 17 | RDR2-sensitive |
| TGGGCTCAGGCGAGGCGAGATCGT | 0   | 9  | RDR2-sensitive |
| TGGGCTCCCTGCTGCGCGGTGTTT | 0   | 14 | RDR2-sensitive |
| TGGGCTCGGACAGGAACTAGGCA  | 0   | 13 | RDR2-sensitive |
| TGGGCTCGGGCGAGGCGAGATCGT | 7   | 40 | RDR2-sensitive |
| TGGGCTCGGGCGAGGCGTGATCGA | 2   | 14 | RDR2-sensitive |
| TGGGCTCGGGCGAGGCGTGATCGC | 0   | 9  | RDR2-sensitive |
| TGGGCTCTCTCTAACTAATGGAAG | 0   | 9  | RDR2-sensitive |
| TGGGCTCTCTCTAACTACAGGAAG | 0   | 11 | RDR2-sensitive |
| TGGGCTCTCTCTAACTGGTGGAAG | 0   | 14 | RDR2-sensitive |
| TGGGCTCTGTGGGTGGCACGTCGT | 0   | 17 | RDR2-sensitive |
| TGGGCTCTTTGGACCGGTAGAAAC | 0   | 15 | RDR2-sensitive |
| TGGGCTGAAGGCGTGGCACGACAG | 0   | 9  | RDR2-sensitive |
| TGGGCTGACACGAGCACGACACGA | 0   | 9  | RDR2-sensitive |
| TGGGCTGACAGCGCAAGGAGGAGT | 25  | 1  | RDR2-resistant |
| TGGGCTGAGAGCAGGCATGCAGGA | 0   | 13 | RDR2-sensitive |
| TGGGCTGCAATTACGGAGATCCAC | 0   | 12 | RDR2-sensitive |
| TGGGCTGCCGGCTACGCTCGTCGG | 0   | 30 | RDR2-sensitive |
| TGGGCTGCGACGCAGGGAACGCGC | 0   | 16 | RDR2-sensitive |
| TGGGCTGCGACGCTACGTAGAAGT | 0   | 10 | RDR2-sensitive |
| TGGGCTGCGATCCAGGCACGTCGT | 0   | 58 | RDR2-sensitive |
| TGGGCTGCGGCTGAAGACCTGCTC | 1   | 14 | RDR2-sensitive |
| TGGGCTGCTCCATACGGTAAAGGA | 0   | 16 | RDR2-sensitive |
| TGGGCTGCTCCTCTAACAGACGG  | 1   | 15 | RDR2-sensitive |
| TGGGCTGGCCAAACACGCAAACGG | 0   | 36 | RDR2-sensitive |
| TGGGCTGGCGAAACGGTGAGTCAG | 0   | 11 | RDR2-sensitive |
| TGGGCTGGGCTGGGCTACAATGGG | 0   | 19 | RDR2-sensitive |
| TGGGCTGGGGCACGCAGCACACTC | 0   | 14 | RDR2-sensitive |
| TGGGCTGTCTATGGCACGACACAC | 0   | 10 | RDR2-sensitive |
| TGGGCTGTGACTCTGAAATGGCGT | 0   | 27 | RDR2-sensitive |

|                           |    |    |                |
|---------------------------|----|----|----------------|
| TGGGCTGTGCTACAGAGGCAGGAC  | 0  | 12 | RDR2-sensitive |
| TGGGCTGTTGCAGAGTGAACGGTT  | 0  | 9  | RDR2-sensitive |
| TGGGCTGTTGGATGGTAAGATCGG  | 0  | 17 | RDR2-sensitive |
| TGGGCTTGTAGAAATATAGGCAT   | 0  | 14 | RDR2-sensitive |
| TGGGCTTTCGAAGACGTTTGCTGC  | 0  | 20 | RDR2-sensitive |
| TGGGCTTTTCGGGCTGGCACGGCC  | 0  | 9  | RDR2-sensitive |
| TGGGGAAAGGTAGGATAGAGACGT  | 0  | 15 | RDR2-sensitive |
| TGGGGAACTCAACAGTGC GAAGAC | 0  | 9  | RDR2-sensitive |
| TGGGGAACTCTTTCTAGCAGGAAA  | 0  | 10 | RDR2-sensitive |
| TGGGGAATTCTGTGGTCGGCTGGC  | 0  | 16 | RDR2-sensitive |
| TGGGGACAGGTAGGATAGAGACGT  | 0  | 11 | RDR2-sensitive |
| TGGGGACGCAGATGAGGGATTGA   | 27 | 0  | RDR2-resistant |
| TGGGGACGCTGAGAACGCGGACGT  | 0  | 25 | RDR2-sensitive |
| TGGGGACGGGCACGACAGAACCAG  | 0  | 15 | RDR2-sensitive |
| TGGGGACTGCGAGTGC GAGACGAG | 0  | 19 | RDR2-sensitive |
| TGGGGAGGACACCGATAAGACGAT  | 37 | 1  | RDR2-resistant |
| TGGGGAGTCGAAACGGTAGAGGGC  | 14 | 0  | RDR2-resistant |
| TGGGGATCCGCGGGCGTCAATGGC  | 39 | 1  | RDR2-resistant |
| TGGGGATCGAGCCGGGGATGACGT  | 0  | 16 | RDR2-sensitive |
| TGGGGATGCACGAACGACGACGAC  | 0  | 17 | RDR2-sensitive |
| TGGGGCAACAGAGAACATACCCAC  | 4  | 67 | RDR2-sensitive |
| TGGGGCAACAGAGAACATACTCAC  | 0  | 25 | RDR2-sensitive |
| TGGGGCAACAGAGAACGTATCCAT  | 0  | 57 | RDR2-sensitive |
| TGGGGCACGCGGCGACACTCACTC  | 3  | 19 | RDR2-sensitive |
| TGGGGCACGCGGCGACATTCACTC  | 1  | 15 | RDR2-sensitive |
| TGGGGCATCGTCACTTGAATCGGA  | 40 | 7  | RDR2-resistant |
| TGGGGCTAAGGGCAAGGGTAAGAC  | 18 | 0  | RDR2-resistant |
| TGGGGCTGACAGCGCAAGAGACAA  | 0  | 10 | RDR2-sensitive |
| TGGGGCTGGGCACGTCGGACGGCA  | 0  | 10 | RDR2-sensitive |
| TGGGGCTGTAGCAAGTACCGGGGC  | 0  | 10 | RDR2-sensitive |
| TGGGGCTTTACTGTTGGAGCGGAG  | 1  | 12 | RDR2-sensitive |
| TGGGGCTTTTCGACGACTTCATCAA | 18 | 0  | RDR2-resistant |
| TGGGGGACAATTGTGGACGGGCAT  | 0  | 9  | RDR2-sensitive |
| TGGGGGACCGATCCGCAGGACGTG  | 67 | 0  | RDR2-resistant |
| TGGGGGACCGATCCGCGGGACGTG  | 17 | 1  | RDR2-resistant |
| TGGGGGACTTGCTGCTGCCTGCGG  | 29 | 3  | RDR2-resistant |
| TGGGGGCATGAGCAGGAGGGAGAT  | 22 | 1  | RDR2-resistant |
| TGGGGGCATGGTGGGGCAGGTATT  | 18 | 1  | RDR2-resistant |
| TGGGGGCGCTGTGGAGCAGAGGGG  | 23 | 1  | RDR2-resistant |
| TGGGGGCTGTAGGGGGCACTCCAC  | 0  | 9  | RDR2-sensitive |
| TGGGGGTAGATCTAAGCAAGACGT  | 0  | 24 | RDR2-sensitive |
| TGGGGGTAGATGTGAGCAAGACGT  | 0  | 32 | RDR2-sensitive |
| TGGGGTAAGAAGCGGAACGCCAC   | 0  | 12 | RDR2-sensitive |
| TGGGGTCAAGGGTCGGACGAGGC   | 0  | 21 | RDR2-sensitive |
| TGGGGTCTGTAGCAGTCGACCGTT  | 0  | 10 | RDR2-sensitive |
| TGGGGTCTGTAGCAGTCGACTGTT  | 0  | 10 | RDR2-sensitive |
| TGGGGTGAACATAGCGAGGACGA   | 0  | 63 | RDR2-sensitive |
| TGGGGTTGGGCTGCTGTCGATGGG  | 0  | 11 | RDR2-sensitive |
| TGGGGTTGGTAGGCAGGATCGGAT  | 0  | 10 | RDR2-sensitive |

|                            |    |    |                |
|----------------------------|----|----|----------------|
| TGGGTAACCTGTTGAACACGGTAT   | 0  | 18 | RDR2-sensitive |
| TGGGTAACGTTCCGCCGATGCATG   | 0  | 15 | RDR2-sensitive |
| TGGGTAAGGCTGGAGGAGAGACGT   | 0  | 12 | RDR2-sensitive |
| TGGGTACAATGTCGGATCGGGTAT   | 0  | 27 | RDR2-sensitive |
| TGGGTACACAGGGAACGGAGACAG   | 0  | 14 | RDR2-sensitive |
| TGGGTACTGTAGGACGGCTAATAA   | 0  | 11 | RDR2-sensitive |
| TGGGTAGAGACCCCTGACAGACGT   | 1  | 17 | RDR2-sensitive |
| TGGGTCAGTTTGGAAAGCTAGCATC  | 15 | 0  | RDR2-resistant |
| TGGGTCATGTCCGGTCCGCCACAA   | 0  | 10 | RDR2-sensitive |
| TGGGTCCGATGGCATACTGGCGAA   | 4  | 61 | RDR2-sensitive |
| TGGGTCCGATGTCATACTGGCGAA   | 0  | 9  | RDR2-sensitive |
| TGGGTCGAGCGCGTGGGCGAGCAC   | 0  | 10 | RDR2-sensitive |
| TGGGTCGAGCGTGTGGGCGAGCGC   | 63 | 1  | RDR2-resistant |
| TGGGTCGCGACGTTACCCGGTAGA   | 39 | 0  | RDR2-resistant |
| TGGGTCGCTGTTGTGGTATGCCGT   | 0  | 9  | RDR2-sensitive |
| TGGGTCGGAACGATTCTAACC GG   | 0  | 18 | RDR2-sensitive |
| TGGGTCGGTCTTGTCCGGTCCGCAC  | 0  | 14 | RDR2-sensitive |
| TGGGTCGTACCAGATATATGTCGT   | 0  | 11 | RDR2-sensitive |
| TGGGTCTACGACTGTGGTTAGGCT   | 0  | 9  | RDR2-sensitive |
| TGGGTCTAGACTGTCTGTGATGGC   | 0  | 10 | RDR2-sensitive |
| TGGGTCTCATGGACCTCGCGGACG   | 61 | 10 | RDR2-resistant |
| TGGGTCTCGAAGTCCGGTATCTTC   | 20 | 1  | RDR2-resistant |
| TGGGTCTGATTGTGAGTTGGGCAT   | 0  | 13 | RDR2-sensitive |
| TGGGTCTTGACTGACGGATCAGAG   | 0  | 23 | RDR2-sensitive |
| TGGGTCTTTGGGCTTGATTACGTC   | 24 | 0  | RDR2-resistant |
| TGGGTGAACTGCTGAACACGGTAT   | 0  | 34 | RDR2-sensitive |
| TGGGTGAACTGCTGGACACGGTCT   | 0  | 10 | RDR2-sensitive |
| TGGGTGAAGATATATGCAATGATG   | 14 | 0  | RDR2-resistant |
| TGGGTGACGTAGCTCCTCCGGTAT   | 0  | 16 | RDR2-sensitive |
| TGGGTGGCACCGAGGAGAAGAGAC   | 39 | 3  | RDR2-resistant |
| TGGGTGGGATTGGATGGGTTTCAA   | 0  | 21 | RDR2-sensitive |
| TGGGTGTAGATCTGAGCAAGGCGT   | 0  | 17 | RDR2-sensitive |
| TGGGTGTAGACAAGTGACCGCAT    | 0  | 9  | RDR2-sensitive |
| TGGGTGTCCGGGGTTGAAGGGGAA   | 16 | 0  | RDR2-resistant |
| TGGGTGTCTTGATGGGCTTGGCAT   | 21 | 2  | RDR2-resistant |
| TGGGTGTGGAAGCGACGACGACAT   | 0  | 10 | RDR2-sensitive |
| TGGGTGTAGTAGCGTGAGACGTC    | 0  | 19 | RDR2-sensitive |
| TGGGTTACCCTGGAAGATGAACGG   | 0  | 9  | RDR2-sensitive |
| TGGGTTCCCTCAAGCGTCGTCCGGC  | 17 | 1  | RDR2-resistant |
| TGGGTTGAACCAGGTTGCAGGGAT   | 0  | 10 | RDR2-sensitive |
| TGGGTTGAACCAGGTTGTAGAGGT   | 0  | 9  | RDR2-sensitive |
| TGGGTTGAGAAGGTGGGAGGGCAA   | 0  | 14 | RDR2-sensitive |
| TGGGTTGCTAAACTCGTCTGTCTGT  | 0  | 13 | RDR2-sensitive |
| TGGGTTGGCTGTTCGAGCCC GCGGT | 0  | 12 | RDR2-sensitive |
| TGGGTTGGTAGACATGTTATCGGC   | 0  | 10 | RDR2-sensitive |
| TGGGTTGTA CTGCAGAGGCACGAT  | 0  | 9  | RDR2-sensitive |
| TGGGTTGTATATGGTTGACAGGTG   | 52 | 7  | RDR2-resistant |
| TGGGTTGTCCAGAGAGAACGGA     | 0  | 31 | RDR2-sensitive |
| TGGGTTGTGAAGATAGGAGGACAA   | 0  | 11 | RDR2-sensitive |

|                           |     |    |                |
|---------------------------|-----|----|----------------|
| TGGGTTGTGAAGGTGGGAGGGCAA  | 0   | 15 | RDR2-sensitive |
| TGGGTTTGTTCGGATTGGGTCGG   | 0   | 9  | RDR2-sensitive |
| TGGGTTTTTGGAGTGGAGAAGGTG  | 15  | 0  | RDR2-resistant |
| TGGTAAAGATGAATCAATTCGGT   | 14  | 0  | RDR2-resistant |
| TGGTAACTTATGTAAGCTGGAGAT  | 0   | 11 | RDR2-sensitive |
| TGGTAAGTTGGAACGGAGCGGCTC  | 0   | 16 | RDR2-sensitive |
| TGGTAATCTGGAACGGAACGGCTC  | 1   | 13 | RDR2-sensitive |
| TGGTAATCTGGAACGGAGCGGCTC  | 11  | 78 | RDR2-sensitive |
| TGGTAATCTGGAACGGAGCGGCTT  | 1   | 17 | RDR2-sensitive |
| TGGTACAGCTGAACTGGATGGCAC  | 0   | 11 | RDR2-sensitive |
| TGGTACATCCTCATCTGTTTGACG  | 31  | 2  | RDR2-resistant |
| TGGTACCATGTAGGAGCGATGCAC  | 1   | 15 | RDR2-sensitive |
| TGGTACCGGTAGAACTGCCACGGA  | 0   | 21 | RDR2-sensitive |
| TGGTACTCTCTGCGCAGGGGCGGA  | 0   | 14 | RDR2-sensitive |
| TGGTACTGTATGCGGTCACCTCGT  | 0   | 9  | RDR2-sensitive |
| TGGTAGAACACTGGCAGAACACGG  | 0   | 12 | RDR2-sensitive |
| TGGTAGAAGTGTGGAATGATAGCT  | 84  | 7  | RDR2-resistant |
| TGGTAGACTGATTGATGATTGCAC  | 21  | 0  | RDR2-resistant |
| TGGTAGAGAGGAAGAACAGGACGC  | 1   | 28 | RDR2-sensitive |
| TGGTAGAGGAGGCAGTAGAGTGAT  | 0   | 14 | RDR2-sensitive |
| TGGTAGCGGTTGGCACAGGAACAC  | 0   | 10 | RDR2-sensitive |
| TGGTAGCTGCGCGAGTTGGACCGG  | 0   | 17 | RDR2-sensitive |
| TGGTAGGACTCTCTCGGAGGGCGC  | 0   | 17 | RDR2-sensitive |
| TGGTAGGGCCGAGCACACGGACGT  | 0   | 12 | RDR2-sensitive |
| TGGTAGGGCTGACGCGGTGCCGAC  | 0   | 22 | RDR2-sensitive |
| TGGTAGGTTGGTAGGTGGACAGGA  | 0   | 9  | RDR2-sensitive |
| TGGTAGTTGCCTGAACAACGACGG  | 0   | 20 | RDR2-sensitive |
| TGGTAGTTGCCTGAACGACGACAG  | 0   | 9  | RDR2-sensitive |
| TGGTAGTTGCCTGAACGACGACGG  | 2   | 50 | RDR2-sensitive |
| TGGTATACTAGCCGAGCTCACGGT  | 4   | 17 | RDR2-sensitive |
| TGGTATGGTGAAATTGACGCTGCT  | 23  | 0  | RDR2-resistant |
| TGGTATGTTTTTTTGGACGGTTCTA | 47  | 0  | RDR2-resistant |
| TGGTATTGTAGAACGGAGCGGTTC  | 0   | 21 | RDR2-sensitive |
| TGGTCAACTCGGCTCGGCTCGGAT  | 0   | 19 | RDR2-sensitive |
| TGGTCACTGTTACAGGCACTTGCT  | 705 | 47 | RDR2-resistant |
| TGGTCAGACTGTTCAAAACGGCCA  | 0   | 10 | RDR2-sensitive |
| TGGTCAGCTCGGCTCGGCTCGGAT  | 0   | 54 | RDR2-sensitive |
| TGGTCAGCTGGAGGATATAGGTAA  | 0   | 12 | RDR2-sensitive |
| TGGTCAGGCCTGTGCGATCAACGA  | 149 | 0  | RDR2-resistant |
| TGGTCAGTAGAGCGGTGGAGTGAC  | 0   | 9  | RDR2-sensitive |
| TGGTCAGTCAGAGTAGACAGGTAA  | 0   | 14 | RDR2-sensitive |
| TGGTCAGTCGGAGGAGATAGGTAA  | 0   | 31 | RDR2-sensitive |
| TGGTCAGTTTGGATCGACTCGGAT  | 0   | 10 | RDR2-sensitive |
| TGGTCATTTTCATCTTTAAGTCGGT | 0   | 9  | RDR2-sensitive |
| TGGTCCATCTCGGACTCGCGACGG  | 0   | 11 | RDR2-sensitive |
| TGGTCCGCGCTCTGGGTCGGACGG  | 0   | 19 | RDR2-sensitive |
| TGGTCCGGATCGAGCCGAACGGCC  | 0   | 13 | RDR2-sensitive |
| TGGTCCTCGGTCACGCATCGTCCG  | 0   | 10 | RDR2-sensitive |
| TGGTCGACATCTCTCAGGACGCAT  | 0   | 10 | RDR2-sensitive |

|                          |     |    |                |
|--------------------------|-----|----|----------------|
| TGGTCGAGGCCGAGGACGTGCGCA | 17  | 1  | RDR2-resistant |
| TGGTCGCAGCCCCTGCTTCGTCCG | 0   | 13 | RDR2-sensitive |
| TGGTCGCATCTCTAGAGCCAGGCT | 0   | 11 | RDR2-sensitive |
| TGGTCGCATCTCTGGAGCCAGGCT | 0   | 10 | RDR2-sensitive |
| TGGTCGCGATTGTATTGCACGGAG | 0   | 11 | RDR2-sensitive |
| TGGTCGCTGTCCCATACTGTACCT | 1   | 12 | RDR2-sensitive |
| TGGTCGGTACGGTGCGGTCAGCGC | 0   | 13 | RDR2-sensitive |
| TGGTCGGTGCTCGGAACTAGACGG | 0   | 23 | RDR2-sensitive |
| TGGTCGTATCTCTGGAGCCAGGCT | 0   | 10 | RDR2-sensitive |
| TGGTCGTGAACCTGGCATCCACAT | 0   | 15 | RDR2-sensitive |
| TGGTCGTGATCTCTGCGAGGACGA | 0   | 11 | RDR2-sensitive |
| TGGTCGTGCTGGTCGGAGGGGCAG | 0   | 11 | RDR2-sensitive |
| TGGTCTCGCTACCGATGTCGTCGT | 0   | 49 | RDR2-sensitive |
| TGGTCTCTGTGGAAGCGTAGACGG | 0   | 15 | RDR2-sensitive |
| TGGTCTGAACCTGTTACTAGACGA | 0   | 9  | RDR2-sensitive |
| TGGTCTGAACGGCAAATGTAGCGT | 0   | 18 | RDR2-sensitive |
| TGGTCTGACTGAACCGAATGGCGC | 0   | 78 | RDR2-sensitive |
| TGGTCTGCGTTAGAAGTTTCCGGT | 98  | 2  | RDR2-resistant |
| TGGTCTGGCCGATGGAACAGGCGC | 2   | 19 | RDR2-sensitive |
| TGGTCTGTGGGTTGGTTGACCGCA | 0   | 9  | RDR2-sensitive |
| TGGTCTTAGGTGGACTGGACAGCA | 1   | 20 | RDR2-sensitive |
| TGGTCTTGCGGATCTGGTCGAGAT | 74  | 4  | RDR2-resistant |
| TGGTCTTGTTCCGCAGCTATGGAA | 25  | 0  | RDR2-resistant |
| TGGTGAAAGAGGCTCGGCTCGGCT | 0   | 19 | RDR2-sensitive |
| TGGTGAACATGCCTGAGCGGGGC  | 31  | 3  | RDR2-resistant |
| TGGTGAACGTACTTCGGCGACAT  | 0   | 26 | RDR2-sensitive |
| TGGTGAATAGGTTGGAAGTCGAGG | 39  | 0  | RDR2-resistant |
| TGGTGAGGATGACTGGTGACGCAT | 0   | 13 | RDR2-sensitive |
| TGGTGAGTCTGGAGAAGGTGGACC | 47  | 3  | RDR2-resistant |
| TGGTGATACGTAGCCGACGGAGCT | 21  | 0  | RDR2-resistant |
| TGGTGATGGTGGGCTTTGGCGGAC | 0   | 12 | RDR2-sensitive |
| TGGTGATTTGGATTGCAAATCGGA | 248 | 13 | RDR2-resistant |
| TGGTGATTTGGATTTGAAATCGGA | 0   | 13 | RDR2-sensitive |
| TGGTGCAGTCTGACATGTCCAGAG | 0   | 11 | RDR2-sensitive |
| TGGTGCCCATGGGGTGACGCCGGA | 45  | 0  | RDR2-resistant |
| TGGTGCGACTCTGTTCTGGCGCGC | 0   | 26 | RDR2-sensitive |
| TGGTGCGACTGAACCAGATGACAA | 0   | 12 | RDR2-sensitive |
| TGGTGCGACTGAACCAGATGACAC | 2   | 72 | RDR2-sensitive |
| TGGTGCGACTGAACCAGATGGCAC | 0   | 13 | RDR2-sensitive |
| TGGTGCGACTGAACCGGATGGCAC | 0   | 21 | RDR2-sensitive |
| TGGTGCGGATGCTTTCTGACGGCT | 292 | 97 | RDR2-resistant |
| TGGTGCGGCTGAACAGGATGGCAC | 1   | 19 | RDR2-sensitive |
| TGGTGCGGCTGAACCGGATGACAC | 0   | 33 | RDR2-sensitive |
| TGGTGCGGCTGAACCGGATGGCAC | 0   | 34 | RDR2-sensitive |
| TGGTGCGGCTGAACCGTTGACAA  | 0   | 12 | RDR2-sensitive |
| TGGTGCGGCTGAACTGGATAGCAC | 0   | 9  | RDR2-sensitive |
| TGGTGCGTTGTACCTGGCTCGGAT | 0   | 18 | RDR2-sensitive |
| TGGTGCTCTCTGGTCAGGCGCGGA | 0   | 20 | RDR2-sensitive |
| TGGTGCTCTCTGTGGAACCACGGA | 0   | 9  | RDR2-sensitive |



|                           |    |     |                |
|---------------------------|----|-----|----------------|
| TGGTGCTGAGTCCATGAACGGCGT  | 0  | 14  | RDR2-sensitive |
| TGGTGCTTTTGAGTAGGACGGTGT  | 0  | 13  | RDR2-sensitive |
| TGGTGAACGACGGCCCGCGCTC    | 25 | 4   | RDR2-resistant |
| TGGTGGACACAGTCAGACAGACAA  | 0  | 9   | RDR2-sensitive |
| TGGTGGACCTGCAGGTGGGGCCTA  | 1  | 17  | RDR2-sensitive |
| TGGTGGACTCTTGGGTGTGGCGGC  | 60 | 14  | RDR2-resistant |
| TGGTGGAGCCTGACAAGAGAGAAC  | 0  | 9   | RDR2-sensitive |
| TGGTGGAGCGATTTGTCTGGTTAA  | 73 | 3   | RDR2-resistant |
| TGGTGGAGGCATGAGGCATGACAC  | 2  | 23  | RDR2-sensitive |
| TGGTGGAGGCCCGCGAGCTGGTGC  | 28 | 2   | RDR2-resistant |
| TGGTGGAGGGCGAGCTTGGACGGT  | 49 | 8   | RDR2-resistant |
| TGGTGGCAGAACACGGAATGACAG  | 0  | 22  | RDR2-sensitive |
| TGGTGGCAGAACCCGGAATGACAG  | 0  | 18  | RDR2-sensitive |
| TGGTGGCGTTGGTCTCCTGGGCAC  | 27 | 1   | RDR2-resistant |
| TGGTGGGCTTTGGGTGGACTGGCT  | 1  | 12  | RDR2-sensitive |
| TGGTGGGGACGCTGAGAACGCGGA  | 0  | 14  | RDR2-sensitive |
| TGGTGGTGCTCTCTGCGACGACGG  | 0  | 9   | RDR2-sensitive |
| TGGTGGTTGGAGACAGAGGATCGA  | 0  | 9   | RDR2-sensitive |
| TGGTGGTTGGCACAGTAGTCGGAA  | 1  | 16  | RDR2-sensitive |
| TGGTGTACGGACGGACGAGTGCCT  | 0  | 13  | RDR2-sensitive |
| TGGTGTACTCTAATGAGCTGGACG  | 35 | 5   | RDR2-resistant |
| TGGTGTAGGGGTAGGCGTCCGAGC  | 0  | 9   | RDR2-sensitive |
| TGGTGTGAATTGCAGAATCCCGCG  | 30 | 6   | RDR2-resistant |
| TGGTGTGATCTCAGGCAGGACAGG  | 0  | 9   | RDR2-sensitive |
| TGGTGTGGTATGCGTGGTGCGGT   | 60 | 11  | RDR2-resistant |
| TGGTTACCTGTACACGAGAGACGT  | 0  | 30  | RDR2-sensitive |
| TGGTTACCTGTACGCGGAAGACGT  | 0  | 27  | RDR2-sensitive |
| TGGTTACCTGTATGGCATACTCTC  | 1  | 17  | RDR2-sensitive |
| TGGTTACCTGTATGTCATCGGCGT  | 0  | 35  | RDR2-sensitive |
| TGGTTACCTGTATGTGGCAGACGT  | 0  | 17  | RDR2-sensitive |
| TGGTTACTTGTAGTGCACCGACGC  | 0  | 20  | RDR2-sensitive |
| TGGTTAGTCGGGCCTATTTAGCAT  | 0  | 14  | RDR2-sensitive |
| TGGTTATGCGTAGAGGACGAGCGT  | 0  | 35  | RDR2-sensitive |
| TGGTTATTATGTGGAATGGGTGGA  | 74 | 0   | RDR2-resistant |
| TGGTTCAATGTAGCGTGGCCGGTG  | 21 | 0   | RDR2-resistant |
| TGGTTCAAAGACCTCAAGGGCAT   | 0  | 23  | RDR2-sensitive |
| TGGTTCAAAGACCTCGAGGGCAT   | 0  | 17  | RDR2-sensitive |
| TGGTTCGGCGGCCGAGGAAGGTCAT | 0  | 11  | RDR2-sensitive |
| TGGTTCGGTGTCAACGAGGGATGG  | 0  | 11  | RDR2-sensitive |
| TGGTTCTGCAGAAGGAGTTGTCAT  | 46 | 8   | RDR2-resistant |
| TGGTTCTGGTCCTGGCTCGAGCGG  | 0  | 14  | RDR2-sensitive |
| TGGTTCTGGTTCTGGCTCGAGCGG  | 0  | 21  | RDR2-sensitive |
| TGGTTGAAGAGCCAAGTAGAACGA  | 0  | 10  | RDR2-sensitive |
| TGGTTGAAGAGCCAAGTAGAACGG  | 0  | 118 | RDR2-sensitive |
| TGGTTGAAGAGCCAAGTAGGACGA  | 0  | 11  | RDR2-sensitive |
| TGGTTGAAGAGCTAAGTAGAACGG  | 0  | 11  | RDR2-sensitive |
| TGGTTGAAGAGTAGAATAGAGCGG  | 0  | 9   | RDR2-sensitive |
| TGGTTGAAGCATTTGATCGTGCA   | 25 | 0   | RDR2-resistant |
| TGGTTGAATTCAGGCTGACTCGG   | 1  | 13  | RDR2-sensitive |

|                          |     |     |                |
|--------------------------|-----|-----|----------------|
| TGGTTGACACTGTGATTGTTAGAC | 21  | 0   | RDR2-resistant |
| TGGTTGACTGGCCCAGAGCACGAC | 0   | 9   | RDR2-sensitive |
| TGGTTGACTGGCCCAGAGCATGGC | 0   | 9   | RDR2-sensitive |
| TGGTTGACTGTACATGGTAGACGC | 0   | 31  | RDR2-sensitive |
| TGGTTGACTGTACGTGATAGACGC | 0   | 39  | RDR2-sensitive |
| TGGTTGACTGTACGTGGTAGACGC | 0   | 10  | RDR2-sensitive |
| TGGTTGACTGTACGTGGTAGATGC | 0   | 48  | RDR2-sensitive |
| TGGTTGACTGTACGTGTTAGACGC | 1   | 86  | RDR2-sensitive |
| TGGTTGAGGAGCCAAGTAGAACGA | 0   | 26  | RDR2-sensitive |
| TGGTTGAGGAGCCAAGTAGAACGG | 2   | 460 | RDR2-sensitive |
| TGGTTGAGGAGCCGAGTAGAACGG | 0   | 14  | RDR2-sensitive |
| TGGTTGAGGATCTAGACGACTATT | 14  | 0   | RDR2-resistant |
| TGGTTGATCCGAGATATGATTGCA | 20  | 0   | RDR2-resistant |
| TGGTTGATGAGCCAAGTAGAACGG | 0   | 11  | RDR2-sensitive |
| TGGTTGATTGTATGGGTAAGACGA | 0   | 11  | RDR2-sensitive |
| TGGTTGCAGAGTGAACGGAACAGA | 0   | 11  | RDR2-sensitive |
| TGGTTGCAGAGTGAACGGAACGGA | 0   | 42  | RDR2-sensitive |
| TGGTTGCATGTAGACAGAGACCCA | 0   | 9   | RDR2-sensitive |
| TGGTTGCCTGAACGCTTGGATGCC | 1   | 22  | RDR2-sensitive |
| TGGTTGCCTGCACCTGGAAGACGT | 0   | 9   | RDR2-sensitive |
| TGGTTGCCTGTACACAGAAGACTC | 0   | 13  | RDR2-sensitive |
| TGGTTGCCTGTACACGAGAAACGG | 0   | 9   | RDR2-sensitive |
| TGGTTGCCTGTACGTGAGGAACGG | 0   | 14  | RDR2-sensitive |
| TGGTTGCGGGTCAGGACGAGATGG | 0   | 10  | RDR2-sensitive |
| TGGTTGCTTGGATACGAGGACGCT | 0   | 12  | RDR2-sensitive |
| TGGTTGAAACGGAGCGGCTCCAT  | 0   | 13  | RDR2-sensitive |
| TGGTTGACGTACAAGAAGGGATA  | 0   | 11  | RDR2-sensitive |
| TGGTTGAGAGCCAAGTAGAACGG  | 1   | 52  | RDR2-sensitive |
| TGGTTGGATGCACGGTATCGGCTC | 0   | 9   | RDR2-sensitive |
| TGGTTGGATGTACAAAGAAGATGT | 0   | 24  | RDR2-sensitive |
| TGGTTGGCTGCACATGAGAGACGT | 0   | 69  | RDR2-sensitive |
| TGGTTGGCTGCAGAGCAGGAGGAC | 0   | 37  | RDR2-sensitive |
| TGGTTGGCTGTAGAGGATAGCGGT | 0   | 12  | RDR2-sensitive |
| TGGTTGGCTGTAGAGGATGACGAT | 0   | 10  | RDR2-sensitive |
| TGGTTGGGTTGTCGAGTATGGCTT | 0   | 9   | RDR2-sensitive |
| TGGTTGTAACGGGCTGTGTCCGT  | 0   | 12  | RDR2-sensitive |
| TGGTTGTAGACAGGACAGGGACGT | 0   | 21  | RDR2-sensitive |
| TGGTTGTGACTGTGGCATCGGCTT | 2   | 16  | RDR2-sensitive |
| TGGTTGTGCGTGATTCCGTGAGAA | 21  | 1   | RDR2-resistant |
| TGGTTGTGGATCAGATGAAGGCAA | 0   | 11  | RDR2-sensitive |
| TGGTTGTGGACAGCTAGGACGGG  | 2   | 31  | RDR2-sensitive |
| TGGTTGTGTGGAGGAGGTGCTGGT | 113 | 12  | RDR2-resistant |
| TGGTTTAGAATTTGTGACCAGAA  | 18  | 0   | RDR2-resistant |
| TGGTTTATGGACATGTATCTTCGG | 0   | 10  | RDR2-sensitive |
| TGGTTTGAAGATCGACGAGCGCAC | 2   | 20  | RDR2-sensitive |
| TGGTTTGACTTCGAGATTGCCGTT | 20  | 0   | RDR2-resistant |
| TGGTTTTAGCTGTATTGACTGCAT | 0   | 16  | RDR2-sensitive |
| TGGTTTTCTCGTAGCACGAACGGT | 1   | 16  | RDR2-sensitive |
| TGGTTTTGTATTGTTGTTGAGAGA | 15  | 0   | RDR2-resistant |

|                            |     |    |                |
|----------------------------|-----|----|----------------|
| TGGTTTTGTCGTAGCACGAACGGT   | 2   | 14 | RDR2-sensitive |
| TGTA AAAATGTCGGCTAATTGATC  | 15  | 0  | RDR2-resistant |
| TGTA AAAAGCTGTAGAAATCGGTAT | 0   | 29 | RDR2-sensitive |
| TGTA AAAATGGACGGTTGGATGGGT | 0   | 10 | RDR2-sensitive |
| TGTA AACAGGTA CTCTCGGACTAA | 0   | 10 | RDR2-sensitive |
| TGTA AATAAGTTGGTGAGAAGGAT  | 50  | 1  | RDR2-resistant |
| TGTA AATCTTTCAACGGGACTGCA  | 0   | 17 | RDR2-sensitive |
| TGTA AACTCGGCAAAGAAGGCTC   | 4   | 47 | RDR2-sensitive |
| TGTA AACTCGGCAAAGATTTTCAT  | 2   | 22 | RDR2-sensitive |
| TGTA ACTGTATTACGCAACGGTAT  | 0   | 12 | RDR2-sensitive |
| TGTA ACTGTTGGCCCTGACGGTGT  | 0   | 10 | RDR2-sensitive |
| TGTA AACTGTACGTTTACGGAGT   | 0   | 9  | RDR2-sensitive |
| TGTA AAGTAACATCTTATGACTGGC | 15  | 0  | RDR2-resistant |
| TGTA ATATATCGGGCACTCGGCAA  | 0   | 10 | RDR2-sensitive |
| TGTA ATTAATCGGACACTCGGCAA  | 0   | 12 | RDR2-sensitive |
| TGT ACCGGACCTTGCTGGACGCAT  | 0   | 14 | RDR2-sensitive |
| TGT ACCTGTAGTACTTGTGCAGAT  | 24  | 2  | RDR2-resistant |
| TGT ACCTGTTAGTCGTCGGCTCAT  | 0   | 10 | RDR2-sensitive |
| TGT ACGACGGAGACTGAGCCAGAC  | 0   | 17 | RDR2-sensitive |
| TGT ACGACGTGGTAGACGGGCTGC  | 0   | 17 | RDR2-sensitive |
| TGT ACGGCGTGGTAGACGGACTGC  | 0   | 9  | RDR2-sensitive |
| TGT ACGGCGTGGTAGACGGGCTAC  | 0   | 10 | RDR2-sensitive |
| TGT ACGGCGTGGTAGACGGGCTGC  | 0   | 33 | RDR2-sensitive |
| TGT ACGGGGCCACTTTGACGGTAT  | 15  | 0  | RDR2-resistant |
| TGT ACGTAGGCTCTAGTTGTGCAT  | 0   | 17 | RDR2-sensitive |
| TGT ACGTCCTGTGGAAGAAGCGGC  | 0   | 14 | RDR2-sensitive |
| TGT ACTAGGGAAGCCGACTTTGAC  | 15  | 0  | RDR2-resistant |
| TGT ACTCGGCCTCGCAGCTGGACA  | 25  | 4  | RDR2-resistant |
| TGT ACTCGTACTCGTAGATAGAGG  | 24  | 1  | RDR2-resistant |
| TGT ACTCTAATGAGCTGGACGCAC  | 884 | 89 | RDR2-resistant |
| TGT ACTGTACAGTGAGCAAATGGC  | 39  | 0  | RDR2-resistant |
| TGT ACTGTAGACTACACTGATGGC  | 0   | 9  | RDR2-sensitive |
| TGT ACTGTAGACTGTTGTCCGGCGT | 0   | 13 | RDR2-sensitive |
| TGT ACTGTAGAGTGTCCGGTGC GC | 10  | 47 | RDR2-sensitive |
| TGT ACTTTGGATACGTAGATGCAG  | 0   | 17 | RDR2-sensitive |
| TGT AGAAGCCGCAGCCGCAGCCGG  | 1   | 19 | RDR2-sensitive |
| TGT AGAAGGAGTAGAAACTGGTAT  | 0   | 18 | RDR2-sensitive |
| TGT AGAATCAGGACCTATAACGGG  | 59  | 1  | RDR2-resistant |
| TGT AGACCAAAGACAAGATTGCT   | 15  | 0  | RDR2-resistant |
| TGT AGAGGGCAGATATGTAGGCGT  | 59  | 12 | RDR2-resistant |
| TGT AGAGTGGCAGATTCGACAGTT  | 53  | 0  | RDR2-resistant |
| TGT AGATTCGGAGGTTAAGGACGT  | 0   | 16 | RDR2-sensitive |
| TGT AGATTTGTTGGTTGCCTGGC   | 0   | 12 | RDR2-sensitive |
| TGT AGCACACTTTCTTGGAGCGGG  | 60  | 5  | RDR2-resistant |
| TGT AGCCCTGGACGGTGGACTCGG  | 0   | 13 | RDR2-sensitive |
| TGT AGCCTGGCTGAGCGACGACGA  | 0   | 9  | RDR2-sensitive |
| TGT AGCCTGTCTGTAGCGGCTGGA  | 0   | 10 | RDR2-sensitive |
| TGT AGCGCGTAGGGGGCTCTCTAG  | 0   | 9  | RDR2-sensitive |
| TGT AGCGCTGACTCTTGGCATTCT  | 30  | 0  | RDR2-resistant |

|                           |     |    |                |
|---------------------------|-----|----|----------------|
| TGTAGCGTCGTATATCACTAACAT  | 23  | 0  | RDR2-resistant |
| TGTAGCGTGTAGAGGTAAGACTGT  | 0   | 10 | RDR2-sensitive |
| TGTAGCTATTGTAGGCGTGCACAC  | 0   | 21 | RDR2-sensitive |
| TGTAGCTGTTGGCCCTGACGGTGT  | 1   | 33 | RDR2-sensitive |
| TGTAGGAAGATGAGGCTGACGGTC  | 19  | 0  | RDR2-resistant |
| TGTAGGACACATGTAGGTGGTCGT  | 0   | 16 | RDR2-sensitive |
| TGTAGGACTCGGCACAGAACGA    | 0   | 12 | RDR2-sensitive |
| TGTAGGACTAGGACCTCGTCAGGC  | 0   | 15 | RDR2-sensitive |
| TGTAGGACTGCTTCCAGAGGTCTGA | 1   | 28 | RDR2-sensitive |
| TGTAGGATCTAGGACACCGGCTAG  | 10  | 47 | RDR2-sensitive |
| TGTAGGATGAGGCGTGGACGACAT  | 0   | 10 | RDR2-sensitive |
| TGTAGGATTCACCAGCAGAGCAAT  | 69  | 0  | RDR2-resistant |
| TGTAGGCACTCGGCAAAGAAGCAA  | 0   | 9  | RDR2-sensitive |
| TGTAGGCAGAAGTAGCACTGGGAC  | 23  | 0  | RDR2-resistant |
| TGTAGGCGTCCACAGTAGCTCGGT  | 0   | 38 | RDR2-sensitive |
| TGTAGGGCTCACCAGACTCGGCGC  | 0   | 10 | RDR2-sensitive |
| TGTAGGGGACACCGCTGCGGCCAT  | 0   | 9  | RDR2-sensitive |
| TGTAGGGTCTTATGCAGAGTCTGT  | 0   | 9  | RDR2-sensitive |
| TGTAGGTAGGACGTGGACACGGAT  | 226 | 5  | RDR2-resistant |
| TGTAGGTAGGACGTGGTCACGGAT  | 236 | 0  | RDR2-resistant |
| TGTAGGTCTGGCGAGCTGACGCAA  | 5   | 29 | RDR2-sensitive |
| TGTAGGTTGATTAATTTGTACGG   | 21  | 1  | RDR2-resistant |
| TGTAGTACCTATGCATGTTGACGG  | 46  | 0  | RDR2-resistant |
| TGTAGTCATGCTATAGATATGAGA  | 326 | 7  | RDR2-resistant |
| TGTAGTCGCATCCGGCTCCGGCGT  | 0   | 9  | RDR2-sensitive |
| TGTAGTCTCTGACAGGTAGGGCCT  | 0   | 66 | RDR2-sensitive |
| TGTAGTCTGAAGCACTTACTGGCA  | 95  | 1  | RDR2-resistant |
| TGTAGTGACTAACAGTGAGGCAGA  | 37  | 3  | RDR2-resistant |
| TGTAGTGATGCACGGTACTGTCAT  | 0   | 19 | RDR2-sensitive |
| TGTAGTGCTGGGAATCTGGGCCGG  | 0   | 11 | RDR2-sensitive |
| TGTAGTGTGATGGTCTGGGTTGAA  | 134 | 1  | RDR2-resistant |
| TGTAGTACTAGTCGGTTGTTTCGT  | 0   | 12 | RDR2-sensitive |
| TGTAGTTAGCGGAGTGGCTCTACT  | 91  | 1  | RDR2-resistant |
| TGTAGTTCTTCTACAGAATGCATA  | 21  | 2  | RDR2-resistant |
| TGTAGTTGAGCCGTGTGATTATTC  | 39  | 0  | RDR2-resistant |
| TGTAGTTGTGGGAGTTACGGACGA  | 0   | 12 | RDR2-sensitive |
| TGTATAACTGTGACGTAGATGACT  | 277 | 36 | RDR2-resistant |
| TGTATAGAACATTAGATTTAGGAC  | 22  | 0  | RDR2-resistant |
| TGTATAGCGAAGTAGGCGAATGAC  | 32  | 1  | RDR2-resistant |
| TGTATCCATAACCAGCTCCGTCGG  | 22  | 0  | RDR2-resistant |
| TGTATCTGTTAGAAATATAGGCAT  | 0   | 12 | RDR2-sensitive |
| TGTATGATATGTAGAGTATGGCAT  | 0   | 13 | RDR2-sensitive |
| TGTATGCCTCTGCGTTGCCACGGT  | 0   | 22 | RDR2-sensitive |
| TGTATGGATCTTGTAGTGTGTGTA  | 31  | 4  | RDR2-resistant |
| TGTATGTATATGGACCGATCTGGC  | 236 | 4  | RDR2-resistant |
| TGTATGTGGGAGCTGACGTTGCAT  | 0   | 9  | RDR2-sensitive |
| TGTATGTGTGACTGAGGCAAGCGC  | 0   | 9  | RDR2-sensitive |
| TGTATGTTTCGATGTAGTTGTACGC | 1   | 16 | RDR2-sensitive |
| TGTATGTTTGGATGTGCATGTGCA  | 36  | 0  | RDR2-resistant |

|                           |    |    |                |
|---------------------------|----|----|----------------|
| TGTATTATAAATGTGATCGAGGAA  | 40 | 2  | RDR2-resistant |
| TGTATTATTAGGGACAACGATGAA  | 17 | 0  | RDR2-resistant |
| TGTATTGTAGGCGTGCACACCCAT  | 0  | 15 | RDR2-sensitive |
| TGTATTTTATCGGACACTCGGCAA  | 0  | 15 | RDR2-sensitive |
| TGTATTTTGTGGCTCGCTGAAAT   | 14 | 0  | RDR2-resistant |
| TGTCAACGACTGTAGCAAAGGTT   | 0  | 13 | RDR2-sensitive |
| TGTCAACGTGGGATGGAACGGGAT  | 0  | 12 | RDR2-sensitive |
| TGTCAACTGTAGATGGCTTGCCAA  | 0  | 19 | RDR2-sensitive |
| TGTCAACTGTTAGTTCGGACGGTA  | 26 | 2  | RDR2-resistant |
| TGTCAAGATCTAGCTCGGCGTCAA  | 0  | 11 | RDR2-sensitive |
| TGTCAAGCTCTCGGTGGAACGCGA  | 0  | 17 | RDR2-sensitive |
| TGTCAAGTTACTGCGGTATTCAAC  | 22 | 1  | RDR2-resistant |
| TGTCACAGGACCTGAGAAGAGCAA  | 0  | 15 | RDR2-sensitive |
| TGTCACATCTGTAGACGACGGTTC  | 0  | 9  | RDR2-sensitive |
| TGTCACGTAGGACAGTTCGGCTAG  | 0  | 33 | RDR2-sensitive |
| TGTCACTCGGTACTCGGCAAAGAA  | 1  | 16 | RDR2-sensitive |
| TGTCACTCTGTGAGCACTCGGCAC  | 0  | 15 | RDR2-sensitive |
| TGTCACTGTTGACGATCGCTCCGA  | 23 | 3  | RDR2-resistant |
| TGTCAGAACCATAGCACTCGGCAA  | 5  | 44 | RDR2-sensitive |
| TGTCAGACCGGTCAGTAGAGCGGC  | 0  | 11 | RDR2-sensitive |
| TGTCAGACCGGTCAGTGGAGCGGC  | 5  | 29 | RDR2-sensitive |
| TGTCAGACGGACCGTTGGACATAA  | 0  | 10 | RDR2-sensitive |
| TGTCAGACTCGGCAAAGACTTCGT  | 0  | 15 | RDR2-sensitive |
| TGTCAGACTGGTCAGTGGAGCGGT  | 2  | 15 | RDR2-sensitive |
| TGTCAGCATCGGAGGGCAGGCCAG  | 0  | 12 | RDR2-sensitive |
| TGTCAGGACTCCAGCTAACGACAT  | 0  | 12 | RDR2-sensitive |
| TGTCAGGCAGTACTCGGCAAAGAA  | 0  | 10 | RDR2-sensitive |
| TGTCAGGGACGCCAACGCTGACGG  | 0  | 9  | RDR2-sensitive |
| TGTCAGGGAGCACTCGGCAAAGAA  | 0  | 9  | RDR2-sensitive |
| TGTCAGGTCCGGTCAGTGGAAAGGC | 0  | 11 | RDR2-sensitive |
| TGTCAGGTCCGGTCAGTGGAGCGGC | 7  | 47 | RDR2-sensitive |
| TGTCAGTCCGGTCTCGGCAAACAA  | 0  | 10 | RDR2-sensitive |
| TGTCAGTTAGGCCGACATACTCGT  | 0  | 10 | RDR2-sensitive |
| TGTCATACTCGGTCTAAGGGGCAA  | 0  | 24 | RDR2-sensitive |
| TGTCATCGAACTGTTAGTCGGTAT  | 0  | 31 | RDR2-sensitive |
| TGTCATGCGGGGATGGTCGTTGGC  | 22 | 1  | RDR2-resistant |
| TGTCATGTCATCGGCCACGGCAC   | 31 | 0  | RDR2-resistant |
| TGTCATGTGACTGTTGGTGGCTAA  | 0  | 18 | RDR2-sensitive |
| TGTCATGTTGCAACGAGGTCGGGT  | 21 | 2  | RDR2-resistant |
| TGTCCAAGCTTCGGCATCTTTGCT  | 31 | 2  | RDR2-resistant |
| TGTCCAGAACTCCCGCTCAGTAGA  | 47 | 11 | RDR2-resistant |
| TGTCCATGTCTGGAGCTCGGACGG  | 0  | 29 | RDR2-sensitive |
| TGTCCCCTGGCGAGCACTCGGCAA  | 0  | 31 | RDR2-sensitive |
| TGTCCCCTGGGATGTGTTTCGTCGA | 0  | 13 | RDR2-sensitive |
| TGTCCCCTGGGGAGAAATCGTCCG  | 1  | 29 | RDR2-sensitive |
| TGTCCGACGGCATCGTAGACAGCC  | 0  | 10 | RDR2-sensitive |
| TGTCCGACGGCTGAAGGCTGGTAG  | 0  | 9  | RDR2-sensitive |
| TGTCCGACGGCTGCCTAGGAGACC  | 0  | 12 | RDR2-sensitive |
| TGTCCGACGGTCTGTAGGAGGCC   | 0  | 47 | RDR2-sensitive |

|                           |    |     |                |
|---------------------------|----|-----|----------------|
| TGTCCGCGCGTACGTAGAGGCTAT  | 0  | 14  | RDR2-sensitive |
| TGTCCGGACGTACGCAGAGGAGGA  | 0  | 21  | RDR2-sensitive |
| TGTCCGGACGTATGCAGAGGAGAA  | 0  | 16  | RDR2-sensitive |
| TGTCCGGCATCCTAGATACAACGA  | 0  | 16  | RDR2-sensitive |
| TGTCCGGTAAATGTAGGGGACGGT  | 0  | 15  | RDR2-sensitive |
| TGTCCGGTGCGACTGTCGACGGAA  | 0  | 9   | RDR2-sensitive |
| TGTCCGGTGCTCCAACGAAGACGC  | 0  | 16  | RDR2-sensitive |
| TGTCCTCTGGCAGCACTCGGCAA   | 3  | 65  | RDR2-sensitive |
| TGTCCTCTGTAGAGGCGCGGACGG  | 0  | 9   | RDR2-sensitive |
| TGTCCTGGCACGGCATAGACCCAC  | 0  | 9   | RDR2-sensitive |
| TGTGCAACGGATTGGCATCACCCAC | 0  | 20  | RDR2-sensitive |
| TGTGACGACTGTAGCAAAATGGT   | 1  | 13  | RDR2-sensitive |
| TGTGACTGAAGGGCGCGCGTCAG   | 0  | 12  | RDR2-sensitive |
| TGTGACTGTAGGGGGTACCCTAT   | 0  | 10  | RDR2-sensitive |
| TGTGAGTAGGACAGTTCGGCTAG   | 0  | 13  | RDR2-sensitive |
| TGTGATGCGGCACAGCAGGACGA   | 1  | 19  | RDR2-sensitive |
| TGTGCACTCGGCAAAGAAGGCTC   | 3  | 25  | RDR2-sensitive |
| TGTGCACTCGGCAAAGAGGACAA   | 0  | 13  | RDR2-sensitive |
| TGTGCACTCGGCAAAGAGGACAC   | 1  | 12  | RDR2-sensitive |
| TGTGCACTCGGCAAAGAGGGCTC   | 2  | 131 | RDR2-sensitive |
| TGTGCCCCCTGGACGGTCGCGGAC  | 18 | 0   | RDR2-resistant |
| TGTGCGCTCGGCAAAGAGGGCTC   | 0  | 10  | RDR2-sensitive |
| TGTGCGGGCTGGGACAAGGCATG   | 0  | 10  | RDR2-sensitive |
| TGTGCGGGCTGGGAGTGGGAGGC   | 0  | 21  | RDR2-sensitive |
| TGTGCGGTCTGTCAAGGCTGAGC   | 15 | 0   | RDR2-resistant |
| TGTGCGTAGGACAATTCGGCTAG   | 1  | 21  | RDR2-sensitive |
| TGTGCGTAGGACAGTTCGGCAAG   | 1  | 20  | RDR2-sensitive |
| TGTGCGTAGGACAGTTCGGCCAG   | 0  | 26  | RDR2-sensitive |
| TGTGCGTAGGACAGTTCGGCTAA   | 1  | 24  | RDR2-sensitive |
| TGTGCGTAGGACAGTTCGGCTAG   | 12 | 749 | RDR2-sensitive |
| TGTGCGTAGGACAGTTCGGCTCG   | 0  | 16  | RDR2-sensitive |
| TGTGCGTAGGACAGTTTGGCTAG   | 0  | 10  | RDR2-sensitive |
| TGTGCGTAGTACTGTTCCGGCTAG  | 0  | 9   | RDR2-sensitive |
| TGTGGATGTAAGTTAGATAGGAA   | 64 | 1   | RDR2-resistant |
| TGTGGTATTCTCTGTGGAGGCGC   | 0  | 9   | RDR2-sensitive |
| TGTGTAATTTTCGTTGGAGTATT   | 17 | 0   | RDR2-resistant |
| TGTGTACGACTGACATTCGGCAA   | 2  | 33  | RDR2-sensitive |
| TGTGTACGGGCACACAGAGCGGT   | 35 | 0   | RDR2-resistant |
| TGTGTACTCGGCAAAGAGGGCTC   | 0  | 10  | RDR2-sensitive |
| TGTGTCTGTCGTTCCGTGCGTCAT  | 0  | 18  | RDR2-sensitive |
| TGTGTGACGGCACTGTACGGCAA   | 0  | 14  | RDR2-sensitive |
| TGTGTGCTTATGGGAAGGGAGAC   | 2  | 23  | RDR2-sensitive |
| TGTCTAAGACTGTATTCAGCGGTT  | 0  | 9   | RDR2-sensitive |
| TGTCTACCTGACAGCACTCGGCAA  | 0  | 13  | RDR2-sensitive |
| TGTCTAGATCGTGCCGGGCCGGCC  | 0  | 13  | RDR2-sensitive |
| TGTCTAGTCATCGGTCCACGGCAC  | 0  | 137 | RDR2-sensitive |
| TGTCTATAGGCTCTCTAAGGCGCT  | 38 | 2   | RDR2-resistant |
| TGTCTATATCGTCATGGTTAAGG   | 58 | 0   | RDR2-resistant |
| TGTCTCGTTTGACTTCCGGCCGG   | 0  | 19  | RDR2-sensitive |

|                           |     |    |                |
|---------------------------|-----|----|----------------|
| TGTCTCGTTTGGACTTTCGGCCGG  | 0   | 24 | RDR2-sensitive |
| TGTCTCTATTGTCGGCTGGGGCAT  | 0   | 27 | RDR2-sensitive |
| TGTCTCTCGAGACTTCGGATGGCC  | 22  | 2  | RDR2-resistant |
| TGTCTCTCGGATAGGGCTGGGCAA  | 0   | 9  | RDR2-sensitive |
| TGTCTCTGTCGGACCAGCGGCTGC  | 0   | 54 | RDR2-sensitive |
| TGTCTCTGTGGTCGGATGGGGCGT  | 0   | 17 | RDR2-sensitive |
| TGTCTGAACGGACGCATGCATTCC  | 0   | 11 | RDR2-sensitive |
| TGTCTGAATTACTTGCTGAAGAGA  | 16  | 0  | RDR2-resistant |
| TGTCTGCGCGGATGAGATAGGCAT  | 1   | 13 | RDR2-sensitive |
| TGTCTGCGGTAGTGTGGCTTCGA   | 0   | 19 | RDR2-sensitive |
| TGTCTGCTCGTCCATGCTGTGCGC  | 1   | 16 | RDR2-sensitive |
| TGTCTGGAATTCATCGGTCGGTAA  | 0   | 11 | RDR2-sensitive |
| TGTCTGGGTGGTGTAGTTGGTTAT  | 14  | 0  | RDR2-resistant |
| TGTCTGGTGGACTGGCACTCGGCA  | 0   | 21 | RDR2-sensitive |
| TGTCTGTACGCGAGGAACGATGGC  | 0   | 9  | RDR2-sensitive |
| TGTCTGTACTCGCCTCGACGCCAT  | 0   | 9  | RDR2-sensitive |
| TGTCTGTAGCAACGCGAATAGCGG  | 2   | 18 | RDR2-sensitive |
| TGTCTGTGCGGCTCGGCACGCTAT  | 0   | 16 | RDR2-sensitive |
| TGTCTGTGCTATGGTGCACCGGAC  | 0   | 9  | RDR2-sensitive |
| TGTCTGTCTGTCTGTGCTAGTGCT  | 50  | 0  | RDR2-resistant |
| TGTCTGTGACTCTGGGCCAGACGG  | 0   | 38 | RDR2-sensitive |
| TGTCTGTTGATGGCGCACCGGAC   | 0   | 11 | RDR2-sensitive |
| TGTCTGTTCTGGAGAGGGGAAGAA  | 0   | 10 | RDR2-sensitive |
| TGTCTGTTGACCTGTTCTGACGGT  | 0   | 12 | RDR2-sensitive |
| TGTCTTAACTACGGACTTAGACGG  | 151 | 12 | RDR2-resistant |
| TGTCTTAGACACTCGGCAAAGAAC  | 0   | 10 | RDR2-sensitive |
| TGTCTTCATACTGTAGTAAGAGGT  | 0   | 15 | RDR2-sensitive |
| TGTCTTCATACTGTAGTAAGGGGT  | 0   | 21 | RDR2-sensitive |
| TGTCTTGCTATCATCGTTCGGTCA  | 1   | 18 | RDR2-sensitive |
| TGTCTTGTAGAAGGGGTATGAAAT  | 0   | 13 | RDR2-sensitive |
| TGTCTTGATGAATCCACGGCCT    | 45  | 5  | RDR2-resistant |
| TGTCTTTCACTGTGGATAGGCGAC  | 3   | 21 | RDR2-sensitive |
| TGTCTTTTACAAATCGTTTGGCAA  | 0   | 19 | RDR2-sensitive |
| TGTCTTTTACTGTGGATAGGCGAC  | 0   | 9  | RDR2-sensitive |
| TGTCTTTTGTGCGGACACTCGGCAA | 0   | 14 | RDR2-sensitive |
| TGTCTTTTGTGCGGCACTCGGCAA  | 3   | 54 | RDR2-sensitive |
| TGTCTTTTTCGCTCGGTCACGGTC  | 0   | 11 | RDR2-sensitive |
| TGTGAAAAGTGAATACGTCATC    | 14  | 0  | RDR2-resistant |
| TGTGAACAGGTACCCTCGGACTAA  | 2   | 15 | RDR2-sensitive |
| TGTGAACAGGTACCTTCGGACTAA  | 0   | 15 | RDR2-sensitive |
| TGTGAACGACGCAACGACGAACGA  | 0   | 16 | RDR2-sensitive |
| TGTGAATAGTTGTTGACGCTGTGT  | 19  | 0  | RDR2-resistant |
| TGTGACAAGAGAACCGAGCGGTAT  | 0   | 10 | RDR2-sensitive |
| TGTGACAAGTTCTCTGAAAAGGCG  | 139 | 8  | RDR2-resistant |
| TGTGACAATATAAGCTTCAGACAA  | 74  | 4  | RDR2-resistant |
| TGTGACACTCGGCAAAGAAGGCTC  | 1   | 26 | RDR2-sensitive |
| TGTGACAGAGACTCGGCAACAA    | 0   | 21 | RDR2-sensitive |
| TGTGACAGGAAGCTGATCGACGTC  | 0   | 10 | RDR2-sensitive |
| TGTGACCGCGGAGAATTGTTGGAT  | 0   | 9  | RDR2-sensitive |

|                            |     |    |                |
|----------------------------|-----|----|----------------|
| TGTGACCTCAAGAACTGTCGGCAG   | 0   | 14 | RDR2-sensitive |
| TGTGACCTGGGATCTACGTGGCAT   | 1   | 37 | RDR2-sensitive |
| TGTGACGACGTACATCTCTTATGT   | 182 | 0  | RDR2-resistant |
| TGTGACTCTCGACAAAGAGGACTC   | 0   | 9  | RDR2-sensitive |
| TGTGACTCTGTACCGAGCCGGCCC   | 0   | 20 | RDR2-sensitive |
| TGTGACTCTGTAGCAATGACGCAC   | 0   | 13 | RDR2-sensitive |
| TGTGACTTATGACGCGATAGACGG   | 28  | 5  | RDR2-resistant |
| TGTGAGAACATGGGAGATGCTGAC   | 46  | 2  | RDR2-resistant |
| TGTGAGAGCGGGATGGGAACGGAG   | 1   | 19 | RDR2-sensitive |
| TGTGAGAGCGGGATTGGAACGGAG   | 2   | 17 | RDR2-sensitive |
| TGTGAGCACAGGAGGCAGAACCGT   | 0   | 18 | RDR2-sensitive |
| TGTGAGCTGTGACGGCTGAGTTGT   | 30  | 1  | RDR2-resistant |
| TGTGAGGACTAGACTGAGACGGAG   | 1   | 14 | RDR2-sensitive |
| TGTGAGGACTGTATGAGAGGGCAT   | 0   | 27 | RDR2-sensitive |
| TGTGAGGACTGTATGAGAGGGTAT   | 0   | 9  | RDR2-sensitive |
| TGTGAGGTTCGTTTCAGGACGAGCAT | 8   | 37 | RDR2-sensitive |
| TGTGAGTACAGGGCTGGGAAGGCT   | 0   | 9  | RDR2-sensitive |
| TGTGAGTCAAGACGGGATGGGACA   | 0   | 21 | RDR2-sensitive |
| TGTGAGTCAAGGCTGAGACGGGAC   | 0   | 35 | RDR2-sensitive |
| TGTGAGTCTGTAGGGATGGTCTAT   | 0   | 32 | RDR2-sensitive |
| TGTGAGTTGGTATGTTTTATGGTT   | 70  | 1  | RDR2-resistant |
| TGTGATCCAAATTCTGAAGAAGGC   | 4   | 59 | RDR2-sensitive |
| TGTGATCGGATCAAACCAGGCTAC   | 0   | 9  | RDR2-sensitive |
| TGTGATCTAAATTCTGAAGAAGGC   | 1   | 17 | RDR2-sensitive |
| TGTGATCTAGGGGTGGCAACGGAT   | 44  | 0  | RDR2-resistant |
| TGTGATCTCAGGCAGGACAGGCTC   | 0   | 9  | RDR2-sensitive |
| TGTGATGACTGGCTCATGCGGCAC   | 1   | 27 | RDR2-sensitive |
| TGTGATTCGGTATGGCTTGCTGTC   | 20  | 0  | RDR2-resistant |
| TGTGCAACGGACGGAGCACCGGAC   | 0   | 10 | RDR2-sensitive |
| TGTGCAACTTGTATACTTTAGAGG   | 21  | 0  | RDR2-resistant |
| TGTGCACTCTAGCCGGGCTGGTGT   | 0   | 14 | RDR2-sensitive |
| TGTGCACTGGAGCAACAGAGACGA   | 0   | 16 | RDR2-sensitive |
| TGTGCACTGGAGCAGCAGGGACGA   | 0   | 9  | RDR2-sensitive |
| TGTGCACTGGAGCAGCAGGGGCGA   | 0   | 22 | RDR2-sensitive |
| TGTGCATGGACCCACGAAGGACGC   | 2   | 15 | RDR2-sensitive |
| TGTGCCCTCTGAGTATCGGACGTG   | 0   | 13 | RDR2-sensitive |
| TGTGCCGGACAGCAAACAGTGCAT   | 0   | 17 | RDR2-sensitive |
| TGTGCCCTCGTTGCGTGTTGTCGG   | 0   | 9  | RDR2-sensitive |
| TGTGCGAGGTCTGGAGAAGGGTAT   | 0   | 29 | RDR2-sensitive |
| TGTGCGCGACTTGTCCCTACCGGC   | 25  | 0  | RDR2-resistant |
| TGTGCGGACAGTCCACGGCCCTAG   | 0   | 20 | RDR2-sensitive |
| TGTGCGGGGTCTGGAGAAGGGTAT   | 2   | 53 | RDR2-sensitive |
| TGTGCGGGGTCTGGGAAGGGTAT    | 0   | 76 | RDR2-sensitive |
| TGTGCGTTGGCTGTGTGCGCGGCC   | 0   | 10 | RDR2-sensitive |
| TGTGCTCCGAATCGGCGTGGCTTT   | 73  | 6  | RDR2-resistant |
| TGTGCTCTGACGACGCCTCGGCAT   | 0   | 16 | RDR2-sensitive |
| TGTGCTGAAGAGCTGCAAGCCTGC   | 0   | 25 | RDR2-sensitive |
| TGTGCTGATTGGATGACTTGAGAA   | 29  | 0  | RDR2-resistant |
| TGTGCTGGAGACGGTTTGTGAGTAC  | 26  | 1  | RDR2-resistant |



|                           |     |    |                |
|---------------------------|-----|----|----------------|
| TGTGCTGTAAGATATGATTGGTGT  | 153 | 32 | RDR2-resistant |
| TGTGCTGTAAGGAGGCAGAACCGT  | 0   | 12 | RDR2-sensitive |
| TGTGCTTCTTCTAGGGTCAGTCGG  | 1   | 22 | RDR2-sensitive |
| TGTGCTTTGGCGTGGAACAGACGA  | 0   | 16 | RDR2-sensitive |
| TGTGCTTTGGCGTGGGACAGACGA  | 1   | 50 | RDR2-sensitive |
| TGTGGAAAAAGCTGCTGTAGGCTG  | 10  | 41 | RDR2-sensitive |
| TGTGGAAAGATTGCAGGAACGGCAA | 0   | 15 | RDR2-sensitive |
| TGTGGAAATCTGCAACGGAAGGCAT | 0   | 11 | RDR2-sensitive |
| TGTGGACAACGTTTACGACTGCAT  | 0   | 10 | RDR2-sensitive |
| TGTGGACAGCGTTTACGACTGCAT  | 0   | 52 | RDR2-sensitive |
| TGTGGACAGTAGGGTTACGCGTGA  | 0   | 16 | RDR2-sensitive |
| TGTGGACCAGCTGAAGTCACGGAG  | 14  | 0  | RDR2-resistant |
| TGTGGACCCAAACAGTGGACGCAT  | 0   | 12 | RDR2-sensitive |
| TGTGGACCGCGGGTAACGTTTCGCC | 37  | 1  | RDR2-resistant |
| TGTGGACGCCACAGTAGAGACAT   | 0   | 9  | RDR2-sensitive |
| TGTGGACGCCTACAGTAGATACAT  | 0   | 57 | RDR2-sensitive |
| TGTGGACGCCTACGGTAGATACAT  | 0   | 56 | RDR2-sensitive |
| TGTGGACGCCTACGGTAGTGACAT  | 1   | 30 | RDR2-sensitive |
| TGTGGACGCTGAGGAGGTGGCTCA  | 20  | 0  | RDR2-resistant |
| TGTGGACGGATGAACTGGCGTCAA  | 0   | 72 | RDR2-sensitive |
| TGTGGACTATGTGGAAGCGCAGCT  | 0   | 11 | RDR2-sensitive |
| TGTGGACTTGTGCAAACAGGCGTG  | 0   | 13 | RDR2-sensitive |
| TGTGGAGACTTGGAGACGTGCGCT  | 1   | 14 | RDR2-sensitive |
| TGTGGAGATCGACGACATTGACAT  | 0   | 11 | RDR2-sensitive |
| TGTGGAGCAAGGAAGCGAACGCAA  | 0   | 50 | RDR2-sensitive |
| TGTGGAGCATCTGCCTAAAGGCAA  | 17  | 0  | RDR2-resistant |
| TGTGGAGCGCAGCGTGGATAATGA  | 39  | 0  | RDR2-resistant |
| TGTGGAGCGCGCTGGCATGACTGC  | 0   | 10 | RDR2-sensitive |
| TGTGGAGGCAGACGCTGGAAGCAA  | 2   | 24 | RDR2-sensitive |
| TGTGGAGGCTACGCAGTACTTGGT  | 0   | 9  | RDR2-sensitive |
| TGTGGAGGCTTACGTAGACGACGT  | 4   | 22 | RDR2-sensitive |
| TGTGGAGTTCTATTGAAGTGGTGA  | 17  | 1  | RDR2-resistant |
| TGTGGATAATCTAGACTTGTGCAT  | 33  | 0  | RDR2-resistant |
| TGTGGATGCTGGGAACTGCGGATG  | 0   | 9  | RDR2-sensitive |
| TGTGGATTCGTTGCGGGACGAGAC  | 39  | 1  | RDR2-resistant |
| TGTGGATTGAGTGGGATTGGATGG  | 1   | 25 | RDR2-sensitive |
| TGTGGCACTCGACAAAGACGTCTT  | 0   | 9  | RDR2-sensitive |
| TGTGGCACTGAACCTGAGATCGAA  | 0   | 13 | RDR2-sensitive |
| TGTGGCAGACTGGCTTGGGTACAT  | 2   | 31 | RDR2-sensitive |
| TGTGGCATGACCCAGATCTGACAC  | 0   | 18 | RDR2-sensitive |
| TGTGGCATTGAGCATGTTCGGACGG | 0   | 17 | RDR2-sensitive |
| TGTGGCCAGACTCTGCAGACGCAA  | 0   | 18 | RDR2-sensitive |
| TGTGGCCATTGATCGTCGACCAGA  | 20  | 1  | RDR2-resistant |
| TGTGGCCCCGGGACAAACAGAACAC | 0   | 9  | RDR2-sensitive |
| TGTGGCCTGGCTGAAAGGAAACGC  | 0   | 18 | RDR2-sensitive |
| TGTGGCTCAAAGTGTGGCGCGGT   | 0   | 9  | RDR2-sensitive |
| TGTGGCTCTTGGTAGATTGGCTGA  | 0   | 16 | RDR2-sensitive |
| TGTGGCTGAAAAGTGTGGCGCGGT  | 8   | 27 | RDR2-sensitive |
| TGTGGCTGGAGTAGAAACCGGTGT  | 0   | 15 | RDR2-sensitive |

|                          |    |    |                |
|--------------------------|----|----|----------------|
| TGTGGCTGTAATCCAATACGGTTT | 21 | 2  | RDR2-resistant |
| TGTGGCTGTACGGACGCGGATGGA | 1  | 15 | RDR2-sensitive |
| TGTGGCTTACCACTTAATGTCGTC | 17 | 1  | RDR2-resistant |
| TGTGGGACGCCAGGCATTGACTAC | 0  | 21 | RDR2-sensitive |
| TGTGGGACTAAAGCCGAGGCACTG | 0  | 12 | RDR2-sensitive |
| TGTGGGACTAAAGCCGGGGCGCTG | 0  | 14 | RDR2-sensitive |
| TGTGGGACTACGACCAGACGTCGT | 0  | 9  | RDR2-sensitive |
| TGTGGGAGAGAGGACGTGACCGAC | 0  | 12 | RDR2-sensitive |
| TGTGGGAGTAGGAGTTCGACGGGC | 0  | 9  | RDR2-sensitive |
| TGTGGGCATAAGAGGAAGGAGGAC | 0  | 20 | RDR2-sensitive |
| TGTGGGCATGAGCCAGTCTGACAC | 0  | 11 | RDR2-sensitive |
| TGTGGGCCTCTCTGCGCAGACTGC | 0  | 14 | RDR2-sensitive |
| TGTGGGCTGTGGCACCAGAGACGT | 0  | 10 | RDR2-sensitive |
| TGTGGGCTTCTCTGCGCAGACTGC | 0  | 24 | RDR2-sensitive |
| TGTGGGGTACGTAGATGGCAGAAC | 0  | 19 | RDR2-sensitive |
| TGTGGGGTTGGTAGGCAGGATCGG | 0  | 15 | RDR2-sensitive |
| TGTGGGTCCGATGGCATACTGGCG | 0  | 18 | RDR2-sensitive |
| TGTGGGTCTCTCTGCGCAAACGGT | 0  | 17 | RDR2-sensitive |
| TGTGGTAGCATAGACTCTAGGCAT | 0  | 11 | RDR2-sensitive |
| TGTGGTATTGTAACCTGCGGTATT | 0  | 10 | RDR2-sensitive |
| TGTGGTCCGATGTAGAGTGGACGG | 0  | 12 | RDR2-sensitive |
| TGTGGTCCTGCAGCGTGAAGTCGG | 0  | 9  | RDR2-sensitive |
| TGTGGTCGAGGACTCCGGCGCTAG | 0  | 9  | RDR2-sensitive |
| TGTGGTCTGTATCAGTTTATGGGG | 28 | 3  | RDR2-resistant |
| TGTGGTCTTACACGGCTAGAACCT | 22 | 0  | RDR2-resistant |
| TGTGGTCTTCAAACCTGGCGAGCA | 20 | 1  | RDR2-resistant |
| TGTGGTTATATGTGGCAGCTTCGC | 27 | 2  | RDR2-resistant |
| TGTGGTCCCGGGCTGAAACGACG  | 0  | 18 | RDR2-sensitive |
| TGTGGTTGAGCGAGTTACGGACAA | 0  | 9  | RDR2-sensitive |
| TGTGGTTGGAGTAGGGACCGGTGT | 2  | 18 | RDR2-sensitive |
| TGTGGTTGTGTGGAGGAGGTGCTG | 26 | 4  | RDR2-resistant |
| TGTGTAAGTTGTATTGAAGGGC   | 62 | 2  | RDR2-resistant |
| TGTGTAAGGTGTAGGCGTCGTCAT | 0  | 14 | RDR2-sensitive |
| TGTGTACCACTCTGGGCCGCGTA  | 0  | 12 | RDR2-sensitive |
| TGTGTACGAGGCCGTCGGAGATAA | 0  | 17 | RDR2-sensitive |
| TGTGTAGAGCAAGGGTGAGTACAC | 0  | 11 | RDR2-sensitive |
| TGTGTAGAGCATGGGTGGTGAGGC | 0  | 9  | RDR2-sensitive |
| TGTGTAGCTCTTTAGAAGTTGGAA | 21 | 0  | RDR2-resistant |
| TGTGTAGTGTGATGGTCTGGGTTG | 19 | 0  | RDR2-resistant |
| TGTGTATGAACAGGCTGGGCGCGC | 1  | 33 | RDR2-sensitive |
| TGTGTATGACAAGCTCCGACGCAG | 2  | 16 | RDR2-sensitive |
| TGTGTATGTAGACGAGGAGTGCAA | 0  | 16 | RDR2-sensitive |
| TGTGTATTGAATCATGAAGACGTC | 24 | 0  | RDR2-resistant |
| TGTGTACAAGTAGGACTGGGCAT  | 0  | 16 | RDR2-sensitive |
| TGTGTCACTCTCGGCGAACGACAA | 0  | 9  | RDR2-sensitive |
| TGTGTGCACTGTGCAAGAAGGCAC | 0  | 9  | RDR2-sensitive |
| TGTGTGCGATTGGTGGGTCGGAAC | 0  | 11 | RDR2-sensitive |
| TGTGTGTCGTAATACATGGGCAT  | 20 | 0  | RDR2-resistant |
| TGTGTGCTGCTGTACCGGCCCTAA | 0  | 23 | RDR2-sensitive |

|                           |     |    |                |
|---------------------------|-----|----|----------------|
| TGTGTCGTGCTTGGGCAAACGGCT  | 0   | 13 | RDR2-sensitive |
| TGTGTCTATGATTTGTGGGTCCGA  | 0   | 13 | RDR2-sensitive |
| TGTGTCTCAAGGTCGCCGGGTCAT  | 1   | 16 | RDR2-sensitive |
| TGTGTCTTGTTTACTTGCATCATA  | 15  | 0  | RDR2-resistant |
| TGTGTGAATCTGAGCGTCGGCAGG  | 91  | 8  | RDR2-resistant |
| TGTGTGATGCAGGACGATCGTCGA  | 0   | 9  | RDR2-sensitive |
| TGTGTGCATGTAGTTGTTCCGGCT  | 0   | 11 | RDR2-sensitive |
| TGTGTGCTCCATTTGATTGTCGT   | 26  | 0  | RDR2-resistant |
| TGTGTGGAACGTACAACGGCTGAG  | 0   | 13 | RDR2-sensitive |
| TGTGTGGACGAGGTAGCGAAGGCT  | 312 | 14 | RDR2-resistant |
| TGTGTGGATGAGTCTGAAGCCGCA  | 43  | 0  | RDR2-resistant |
| TGTGTGGTCACTGTTACGACGGT   | 54  | 1  | RDR2-resistant |
| TGTGTGTCGTCGTAATACATGGGC  | 16  | 0  | RDR2-resistant |
| TGTGTGTGACTGAGGGAAGCACGT  | 0   | 20 | RDR2-sensitive |
| TGTGTGTTGGTTGGGCTTCCGCAT  | 0   | 15 | RDR2-sensitive |
| TGTGTTACTTCGACGTCATGACAT  | 0   | 19 | RDR2-sensitive |
| TGTGTTAGGATTGAAAACGGACGG  | 0   | 13 | RDR2-sensitive |
| TGTGTTATACTGTTATGAGATGGA  | 2   | 28 | RDR2-sensitive |
| TGTGTTCTGTATAAGATGAGCTC   | 0   | 16 | RDR2-sensitive |
| TGTGTTCTGGAACGGGCTCGACGA  | 0   | 67 | RDR2-sensitive |
| TGTGTTGGCTGTACGCATTACCAT  | 0   | 18 | RDR2-sensitive |
| TGTGTTGGGCACCGGAAATGGCCG  | 0   | 10 | RDR2-sensitive |
| TGTGTTTATTGGCTAGATTCTCGG  | 0   | 9  | RDR2-sensitive |
| TGTGTTTTCGGACGTGTCGCGGCAC | 0   | 10 | RDR2-sensitive |
| TGTGTTTGACATGATCTGGGAAAA  | 35  | 0  | RDR2-resistant |
| TGTGTTTGACATGATCTGGGAAGA  | 29  | 0  | RDR2-resistant |
| TGTGTTTGGTAATCTGGAACGGAG  | 6   | 65 | RDR2-sensitive |
| TGTGTTTGGTTTACTTTTGGCTT   | 0   | 17 | RDR2-sensitive |
| TGTGTTTGTAGCTAGATTCTCGG   | 0   | 9  | RDR2-sensitive |
| TGTGTTTTATGTATGACCTATCGA  | 44  | 0  | RDR2-resistant |
| TGTTAACCGGCTAGTGTAGAGGAC  | 0   | 10 | RDR2-sensitive |
| TGTTAACTGGACAGCACTCGGCAA  | 0   | 27 | RDR2-sensitive |
| TGTTAATATATTTTCGTTGGAGACT | 14  | 0  | RDR2-resistant |
| TGTTACCGACTGTAGCTCGATGGT  | 0   | 9  | RDR2-sensitive |
| TGTTACCGAGTGGACAGTTGACGC  | 0   | 10 | RDR2-sensitive |
| TGTTACCTATGGATTGGACGGGAT  | 0   | 10 | RDR2-sensitive |
| TGTTACTTTAGCAGGCAGAACACA  | 16  | 0  | RDR2-resistant |
| TGTTAGACCCGTAGCGAACGACGA  | 0   | 28 | RDR2-sensitive |
| TGTTAGAGCTCGTCCTTATAGGCA  | 27  | 0  | RDR2-resistant |
| TGTTAGAGCTCGTTCTTATAGGCA  | 112 | 7  | RDR2-resistant |
| TGTTAGATTCTGACCTCTTGGCGC  | 44  | 4  | RDR2-resistant |
| TGTTAGCTACGGACGGCTGCTGAC  | 0   | 9  | RDR2-sensitive |
| TGTTAGGAGCCGGCGTACACTGTT  | 0   | 10 | RDR2-sensitive |
| TGTTAGGCACGGCACTGTTAGGCA  | 0   | 14 | RDR2-sensitive |
| TGTTAGGGTTCGGTGATGGTGGTG  | 19  | 0  | RDR2-resistant |
| TGTTAGGTA CTGGACGGATGGGTT | 0   | 9  | RDR2-sensitive |
| TGTTAGGTGGGA ACTCTAGCGGCT | 0   | 15 | RDR2-sensitive |
| TGTTAGTCGGTATACATTGACACA  | 0   | 9  | RDR2-sensitive |
| TGTTAGTCGGTATATGTTAGTCAC  | 0   | 31 | RDR2-sensitive |

|                           |     |    |                |
|---------------------------|-----|----|----------------|
| TGTTAGTTGCCACTGTATGGAAGA  | 32  | 0  | RDR2-resistant |
| TGTTATACCTCCATGTCGTTCCGGC | 16  | 0  | RDR2-resistant |
| TGTTATATATTGCAGAGGACTACA  | 54  | 0  | RDR2-resistant |
| TGTTATATCGTATGAGTATGGCGT  | 21  | 1  | RDR2-resistant |
| TGTTATGACCCAGACTCGGCAA    | 4   | 17 | RDR2-sensitive |
| TGTTATGGACCGGGCTGAGGGCAC  | 0   | 16 | RDR2-sensitive |
| TGTTATGGACTGGCATGGTGGCGA  | 0   | 11 | RDR2-sensitive |
| TGTTATTGTTGGGCGGAAGGCGAA  | 0   | 9  | RDR2-sensitive |
| TGTTATTTTCGTCGGCCGGCCCAC  | 0   | 9  | RDR2-sensitive |
| TGTTACGCGGACTTGGCATTAC    | 0   | 9  | RDR2-sensitive |
| TGTTACGCTGACTGGGCATTAC    | 0   | 12 | RDR2-sensitive |
| TGTTACGCTGACTTGGCATTCCG   | 0   | 20 | RDR2-sensitive |
| TGTTCACTCTGTAGCAACGCACGG  | 0   | 13 | RDR2-sensitive |
| TGTTCAGTGGTGGGAACGGTCCGAC | 21  | 2  | RDR2-resistant |
| TGTTCATGGCAATGTGGCTGGCAT  | 70  | 2  | RDR2-resistant |
| TGTTCATGGCTCTGGACTGGACGA  | 0   | 11 | RDR2-sensitive |
| TGTTCCGACGGCTGCTATACGGAC  | 135 | 7  | RDR2-resistant |
| TGTTCCGAAATGAAATTGGCATT   | 16  | 0  | RDR2-resistant |
| TGTTCCGTTTACTGTAGTGACGAC  | 0   | 14 | RDR2-sensitive |
| TGTTCCCTGCTGGCGACGACGATGT | 14  | 0  | RDR2-resistant |
| TGTTCGAACCGTAGACCGTCCGGC  | 0   | 28 | RDR2-sensitive |
| TGTTCCGATCTGGTAGTTTAGCGG  | 66  | 1  | RDR2-resistant |
| TGTTCCGTCGGAATCGGTAAACGG  | 0   | 14 | RDR2-sensitive |
| TGTTCCGTTGGTGGAACGACGGGCC | 36  | 4  | RDR2-resistant |
| TGTTCTCTGGTCAGGCGCGGACGG  | 0   | 9  | RDR2-sensitive |
| TGTTCTGAATTGTATGAGAGACGT  | 0   | 88 | RDR2-sensitive |
| TGTTCTGACTCTGATGTGATGCGG  | 37  | 2  | RDR2-resistant |
| TGTTCTGACTCTGGCGCAGTGCAT  | 0   | 11 | RDR2-sensitive |
| TGTTCTTCGGGCAAAGGATGGCAT  | 0   | 32 | RDR2-sensitive |
| TGTTCTTTACGATCTGCTCGCGAC  | 17  | 0  | RDR2-resistant |
| TGTTCTTTAGGTTCTGTCTGGGCA  | 47  | 0  | RDR2-resistant |
| TGTTGAACCGGACCCAGAACGAGA  | 0   | 35 | RDR2-sensitive |
| TGTTGAACTGTGGACGACGTGCGC  | 0   | 17 | RDR2-sensitive |
| TGTTGAACTTTGGAATTTCCGGTAT | 0   | 9  | RDR2-sensitive |
| TGTTGAAGACATATTTGCTGCAGA  | 55  | 0  | RDR2-resistant |
| TGTTGAAGCTCTGCATTGACGTCC  | 24  | 0  | RDR2-resistant |
| TGTTGAATGGTCATGAGATTGGAT  | 25  | 0  | RDR2-resistant |
| TGTTGACATGGAAAGTTTGAGGCG  | 95  | 5  | RDR2-resistant |
| TGTTGACTCTGTAGCAACGCACGG  | 0   | 9  | RDR2-sensitive |
| TGTTGACTCTGTAGCAACGTACGG  | 1   | 17 | RDR2-sensitive |
| TGTTGACTTGTGCTCGGTGGAGAC  | 0   | 14 | RDR2-sensitive |
| TGTTGAGAACTACGTTACCACGGA  | 0   | 17 | RDR2-sensitive |
| TGTTGAGCTTGACTCTAGTCCGAC  | 18  | 1  | RDR2-resistant |
| TGTTGAGGACGACTGGGATGGT    | 0   | 80 | RDR2-sensitive |
| TGTTGAGGATTGCGCGACGGATGA  | 0   | 13 | RDR2-sensitive |
| TGTTGATAAGGGTCTTGAGCCGGT  | 16  | 0  | RDR2-resistant |
| TGTTGATATCTGGCTTTCACGAA   | 42  | 1  | RDR2-resistant |
| TGTTGATGAATGAGCTAAGTAGAC  | 22  | 0  | RDR2-resistant |
| TGTTGATGCTGCAGAACTAGGCAT  | 0   | 41 | RDR2-sensitive |

|                           |     |    |                |
|---------------------------|-----|----|----------------|
| TGTTGATGGACTGTTTGGTAGGGT  | 105 | 8  | RDR2-resistant |
| TGTTGATGTGGACATATAGGACGG  | 0   | 14 | RDR2-sensitive |
| TGTTGATTTGACCGATCTCGAGGA  | 27  | 2  | RDR2-resistant |
| TGTTGCAAACCTCTCTACAGGGACT | 43  | 3  | RDR2-resistant |
| TGTTGCAGAGGACTTTATAATGCT  | 20  | 0  | RDR2-resistant |
| TGTTGCAGAGTGAACGGTTGACGC  | 0   | 9  | RDR2-sensitive |
| TGTTGCAGAGTGGACGATGACGGT  | 0   | 17 | RDR2-sensitive |
| TGTTGCAGGGTAGAAGTGACGACA  | 23  | 1  | RDR2-resistant |
| TGTTGCATCGGGCTGTGCCGGTTC  | 0   | 28 | RDR2-sensitive |
| TGTTGCCCCGTTGGATGCAAGGCAT | 0   | 11 | RDR2-sensitive |
| TGTTGCCCTGAATAGAACCTGCAT  | 0   | 18 | RDR2-sensitive |
| TGTTGCCGATTCGACTGTCGTGCGC | 0   | 11 | RDR2-sensitive |
| TGTTGCGGCTAGGACAGAGATCGG  | 0   | 13 | RDR2-sensitive |
| TGTTGCGGCTGGAGTAGAGACCGG  | 1   | 12 | RDR2-sensitive |
| TGTTGCTATGGATCAGATCTGCAT  | 0   | 10 | RDR2-sensitive |
| TGTTGCTGGAGCGCTACCGGACGG  | 0   | 9  | RDR2-sensitive |
| TGTTGCTGGAGGGCTAGAGGACGT  | 0   | 32 | RDR2-sensitive |
| TGTTGCTGGATTCTCAAGACGTGG  | 23  | 0  | RDR2-resistant |
| TGTTGCTGGGCGCGTTGAGGACGT  | 0   | 23 | RDR2-sensitive |
| TGTTGGACTTGCAAGGTTGGCCTT  | 0   | 9  | RDR2-sensitive |
| TGTTGGAGGCATACAGGAGGACAT  | 0   | 54 | RDR2-sensitive |
| TGTTGGAGGCTTCCAGAACGGTGA  | 0   | 22 | RDR2-sensitive |
| TGTTGGAGGGGTAGAGGACGTCCT  | 0   | 39 | RDR2-sensitive |
| TGTTGGATAAAATGGCGTGAGAAC  | 26  | 2  | RDR2-resistant |
| TGTTGGCACTCGGCAAAGACTGAC  | 0   | 26 | RDR2-sensitive |
| TGTTGGCCTGAGACTGGATGACGT  | 0   | 10 | RDR2-sensitive |
| TGTTGGCTCGGCTCACTCAGACGA  | 14  | 0  | RDR2-resistant |
| TGTTGGCTTGGGCAGTAGGAAGGT  | 0   | 16 | RDR2-sensitive |
| TGTTGGGATTGTGCGTAGGAGCGG  | 22  | 0  | RDR2-resistant |
| TGTTGGGCACCAAAATGAGCGGAC  | 0   | 9  | RDR2-sensitive |
| TGTTGGGCGGAGACCGGACGGAAG  | 0   | 12 | RDR2-sensitive |
| TGTTGGGGCGAAGGCGAAGACGCT  | 0   | 11 | RDR2-sensitive |
| TGTTGGGTTCCGGACGGTGTGCAC  | 1   | 12 | RDR2-sensitive |
| TGTTGGTACGGGCAGAACGAGCGT  | 0   | 25 | RDR2-sensitive |
| TGTTGGTGGCTGGCTGAAGACTGC  | 0   | 25 | RDR2-sensitive |
| TGTTGGTTTGTAAATAGGAAGTCGT | 0   | 37 | RDR2-sensitive |
| TGTTGGTTTTGGCTACTCAGGCAT  | 23  | 2  | RDR2-resistant |
| TGTTGTAGAAGGGGACGTGAGCAT  | 0   | 18 | RDR2-sensitive |
| TGTTGTAGGACCCTAGGAAGTCGA  | 0   | 20 | RDR2-sensitive |
| TGTTGTGCGGTGCGGAGAGGCAGAT | 3   | 26 | RDR2-sensitive |
| TGTTGTGACTGAGCCGGCCTAGAC  | 0   | 23 | RDR2-sensitive |
| TGTTGTGTTCTGTATGCGTTGGCA  | 359 | 10 | RDR2-resistant |
| TGTTGTTCAATCTGGATCGTCCAT  | 1   | 18 | RDR2-sensitive |
| TGTTGTTCCCTGATGGCTATAATC  | 30  | 0  | RDR2-resistant |
| TGTTGTTGCTTCTGTGGACGGGGT  | 0   | 10 | RDR2-sensitive |
| TGTTGTTGGAGAGGTAGCGGATGT  | 0   | 12 | RDR2-sensitive |
| TGTTGTTTGGTTACCTGGACGGAG  | 1   | 16 | RDR2-sensitive |
| TGTTGTTTGGTTGCTGTGAGGCAG  | 0   | 25 | RDR2-sensitive |
| TGTTGTTTTAGAGGATGGTAAGTA  | 24  | 2  | RDR2-resistant |

|                           |     |     |                |
|---------------------------|-----|-----|----------------|
| TGTTTAGTGC GGCTATGCTCAACG | 34  | 1   | RDR2-resistant |
| TGTTTATAGCTACGATTCGTTGGT  | 107 | 1   | RDR2-resistant |
| TGTTTCAAAGAGGTTGAGAACGGC  | 17  | 0   | RDR2-resistant |
| TGTTTCATCAATCGTGCCTAGACC  | 22  | 0   | RDR2-resistant |
| TGTTTCCATGCAGTAGTATTCAAT  | 20  | 0   | RDR2-resistant |
| TGTTTCCTGTTGGCATTCTATCA   | 17  | 0   | RDR2-resistant |
| TGTTTCGAGCTCGCGAGATGGACG  | 0   | 10  | RDR2-sensitive |
| TGTTTCGGGCAACACGGAAACGGA  | 1   | 19  | RDR2-sensitive |
| TGTTTCTACTCTTTGGACTGGCAC  | 1   | 23  | RDR2-sensitive |
| TGTTTCTATATTTCCGAGGATATT  | 19  | 0   | RDR2-resistant |
| TGTTTCTTAGTTAGCTTATGGCAC  | 15  | 0   | RDR2-resistant |
| TGTTTGAACCTCCGTTCCGGGTAT  | 0   | 23  | RDR2-sensitive |
| TGTTTGAACCTCTGTTCCGGGTAT  | 0   | 15  | RDR2-sensitive |
| TGTTTGAATTCGGGCTGTGCCGGA  | 0   | 16  | RDR2-sensitive |
| TGTTTGAATTTCCGGGTCGTATCGG | 0   | 17  | RDR2-sensitive |
| TGTTTGACTGTCGCGTGCCTTTGC  | 36  | 2   | RDR2-resistant |
| TGTTTGAGTACTCTAAACGGTAT   | 0   | 25  | RDR2-sensitive |
| TGTTTGATGGTACGTGCTACTCGG  | 68  | 6   | RDR2-resistant |
| TGTTTGCATCTTCTTCTTCGGACC  | 20  | 0   | RDR2-resistant |
| TGTTTGCGACTGAGAGCCTAGGCA  | 1   | 16  | RDR2-sensitive |
| TGTTTGCTGTGGACGGCGGGATGT  | 0   | 9   | RDR2-sensitive |
| TGTTTGGACTGACACCTACGGCGC  | 2   | 59  | RDR2-sensitive |
| TGTTTGGATACTCTCAGGACGGAC  | 0   | 12  | RDR2-sensitive |
| TGTTTGGCAATGGACTGGACAGGC  | 0   | 20  | RDR2-sensitive |
| TGTTTGGCTACTCTGTTGGATGGA  | 0   | 9   | RDR2-sensitive |
| TGTTTGGTCTGTAACAAATGGCTT  | 143 | 15  | RDR2-resistant |
| TGTTTGGTTGCAGAGTGAACGGAA  | 4   | 66  | RDR2-sensitive |
| TGTTTGGTTGCTAGCAGTCTCGGC  | 0   | 9   | RDR2-sensitive |
| TGTTTGGTTGTAATGACAGAACGG  | 0   | 10  | RDR2-sensitive |
| TGTTTGGTTGTAGGTTGCATCCAC  | 0   | 12  | RDR2-sensitive |
| TGTTTGGTTTGTAGGTTGGACTGC  | 0   | 9   | RDR2-sensitive |
| TGTTTGGTTTGTGGCTAAGGGGCT  | 0   | 9   | RDR2-sensitive |
| TGTTTGTCTGCTGCAGGCCGGTGC  | 0   | 9   | RDR2-sensitive |
| TGTTTGTGATTCTGTCCGGCTCGA  | 0   | 9   | RDR2-sensitive |
| TGTTTGTGGAATTCGTCGCCGCA   | 20  | 0   | RDR2-resistant |
| TGTTTGTCTGTAGATCCGTGCGG   | 0   | 11  | RDR2-sensitive |
| TGTTTGTGGCTAGATTTGCGGAA   | 3   | 46  | RDR2-sensitive |
| TGTTTTAACATGGCTGTTCCGGATG | 20  | 0   | RDR2-resistant |
| TGTTTTAACATGGTTGTTCCGGATG | 24  | 0   | RDR2-resistant |
| TGTTTTAACGTGGGGCTGAGAGGC  | 1   | 13  | RDR2-sensitive |
| TGTTTTACACTGTAGATTGCACGG  | 0   | 9   | RDR2-sensitive |
| TGTTTTATACTCTGTAGACTGCAC  | 0   | 14  | RDR2-sensitive |
| TGTTTTATCCGGTGAGACTGATGT  | 22  | 1   | RDR2-resistant |
| TGTTTTATTTCCGGACTCGGCAA   | 1   | 24  | RDR2-sensitive |
| TGTTTTATTTCCGGCACTCGGCAA  | 13  | 292 | RDR2-sensitive |
| TGTTTTATTTCCGGCACTCGGCAC  | 0   | 12  | RDR2-sensitive |
| TGTTTTACACCTCGGACTGGCAT   | 1   | 16  | RDR2-sensitive |
| TGTTTTACGGGCTGTGCCGGTCT   | 0   | 14  | RDR2-sensitive |
| TGTTTTCATCCGTCTTCAGACTAT  | 15  | 0   | RDR2-resistant |

|                          |     |     |                |
|--------------------------|-----|-----|----------------|
| TGTTTTGACCGAACATAAGATCGT | 0   | 10  | RDR2-sensitive |
| TGTTTTGGACCGTCATCACATGGC | 19  | 1   | RDR2-resistant |
| TGTTTTTAAGACTGTATACAAAAT | 18  | 0   | RDR2-resistant |
| TGTTTTTACACTTCGGACTGGCAC | 0   | 10  | RDR2-sensitive |
| TGTTTTTACACTTCGGACTGGCAT | 0   | 10  | RDR2-sensitive |
| TGTTTTTACACTTCGGGCTGGCAC | 0   | 31  | RDR2-sensitive |
| TGTTTTTGTTGATTTGTTGGTGC  | 18  | 0   | RDR2-resistant |
| TGTTTTTATCGGACACTCGGCAA  | 0   | 22  | RDR2-sensitive |
| TGTTTTTATCGGGCACTCGGCAA  | 11  | 101 | RDR2-sensitive |
| TGTTTTTTCCTTGGCAGTAGACGC | 23  | 0   | RDR2-resistant |
| TGTTTTTTTTCGGGCACTCGGCAA | 2   | 29  | RDR2-sensitive |
| TTAAAAAGCTCGTAGTTGGACCTT | 51  | 2   | RDR2-resistant |
| TTAAACTTGCATGAACTTAGGCGT | 0   | 9   | RDR2-sensitive |
| TTAAAGACATGTTTGGATGGCTGC | 0   | 10  | RDR2-sensitive |
| TTAAAGTATTGTAACATGTGCATC | 43  | 1   | RDR2-resistant |
| TTAAAGTCGTTGCTCTCTATGGCA | 17  | 0   | RDR2-resistant |
| TTAAATTTGGACAATACATGTGGC | 25  | 0   | RDR2-resistant |
| TTAACAGGTCGGGCTCAAACGGGC | 0   | 9   | RDR2-sensitive |
| TTAACATTAATCTTGTAGATACGG | 0   | 11  | RDR2-sensitive |
| TTAACCGTGGATTCGTGATTGGCG | 20  | 0   | RDR2-resistant |
| TTAACGGGCTTAGAGGTAAACGGG | 0   | 18  | RDR2-sensitive |
| TTAACTAATGTAAGAACGTCCGTA | 36  | 1   | RDR2-resistant |
| TTAACTACGGACTTAGACGGTACC | 170 | 10  | RDR2-resistant |
| TTAACTCGTTAAGTTGGACGGTTT | 0   | 15  | RDR2-sensitive |
| TTAACTCGTTATTATGATCGTTAT | 46  | 1   | RDR2-resistant |
| TTAACTTGACTCTACGAACGGTAT | 0   | 16  | RDR2-sensitive |
| TTAACTTGATTTAGCTCGCTGGTT | 65  | 4   | RDR2-resistant |
| TTAACTTGGAAGCGGACTTCAT   | 0   | 15  | RDR2-sensitive |
| TTAAGACTCTAAGGGGTAGGCTGC | 0   | 15  | RDR2-sensitive |
| TTAAGACTGCATTAATGACAAATT | 17  | 0   | RDR2-resistant |
| TTAAGACTGTAAGGGGTAGGCTGC | 0   | 11  | RDR2-sensitive |
| TTAAGATCTGCTAGTTTAGACCGC | 25  | 0   | RDR2-resistant |
| TTAAGATTGGCAAAGAGAACACGC | 28  | 5   | RDR2-resistant |
| TTAAGGAAACGAGCTGGCTCGGCT | 0   | 11  | RDR2-sensitive |
| TTAAGGAAGGTCAGTACGCGCAGC | 25  | 0   | RDR2-resistant |
| TTAAGGATTGTGGTGTAAGATTGC | 0   | 13  | RDR2-sensitive |
| TTAAGGCTGTAAGGGGTAGGCTGC | 0   | 18  | RDR2-sensitive |
| TTAAGGCTGTAAGGGGTAGGCTGT | 0   | 14  | RDR2-sensitive |
| TTAAGTACATTGTAAGCGTCGGG  | 22  | 0   | RDR2-resistant |
| TTAAGTATTTGCTATATGTTCCGA | 14  | 0   | RDR2-resistant |
| TTAAGTTTCTGTTAGGGTCCGGCC | 78  | 0   | RDR2-resistant |
| TTAATAATCGTGTCGGATCGGCC  | 0   | 11  | RDR2-sensitive |
| TTAATAGGGACAGTCGGGGGCATT | 35  | 3   | RDR2-resistant |
| TTAATATATGTTGGATCGTTGACC | 21  | 2   | RDR2-resistant |
| TTAATCTGTATTCGAGAAGACTTA | 20  | 1   | RDR2-resistant |
| TTAATCTTAAGGATGGTGCCTCGT | 21  | 1   | RDR2-resistant |
| TTAATGGGCCAACACTAGACACAT | 0   | 39  | RDR2-sensitive |
| TTAATGTCGTGCTTGGGTCGTCAC | 0   | 9   | RDR2-sensitive |
| TTAATGTCGTTAGGTCTATCAAAT | 19  | 0   | RDR2-resistant |

|                           |     |    |                |
|---------------------------|-----|----|----------------|
| TTAATGTGTTTGACATGATCTGGG  | 22  | 1  | RDR2-resistant |
| TTAATTAAC TACCGTCGGCCATAA | 0   | 12 | RDR2-sensitive |
| TTAATTTGCACCGTTGGTCTGAAA  | 23  | 0  | RDR2-resistant |
| TTAATTTTCTAAGTGACGTGGACA  | 217 | 1  | RDR2-resistant |
| TTACAAATTCTGAACCTCGTG CAT | 55  | 0  | RDR2-resistant |
| TTACTTTCGGACTAGTACGGCAT   | 0   | 10 | RDR2-sensitive |
| TTACTTTCGGACTGGCACGGCAC   | 0   | 9  | RDR2-sensitive |
| TTACTTTCGGGCTAGCACGGCAC   | 0   | 10 | RDR2-sensitive |
| TTACTTTCGGGCTGGCACGGCAC   | 2   | 60 | RDR2-sensitive |
| TTACTTTCGGGCTGGCACGGTAC   | 1   | 14 | RDR2-sensitive |
| TTACAGCTGTAGCTAGGATGGCAA  | 0   | 25 | RDR2-sensitive |
| TTACATGTTGAAGCTCAATTTTAA  | 14  | 34 | RDR2-sensitive |
| TTACATTCATACGATTTTGTGGAC  | 14  | 0  | RDR2-resistant |
| TTACCAGCTGAGAATTAGGCGTCT  | 0   | 14 | RDR2-sensitive |
| TTACCATTGTAAGTACTGTGACGG  | 0   | 12 | RDR2-sensitive |
| TTACCGACTGTAGCTCGATGGTTC  | 0   | 11 | RDR2-sensitive |
| TTACCGAGTGTAGGACTTTCGGCA  | 0   | 9  | RDR2-sensitive |
| TTACCGATTGTCAGGCTTTGGCAT  | 0   | 19 | RDR2-sensitive |
| TTACCGTCTTATCTGTTGGAGGCC  | 0   | 10 | RDR2-sensitive |
| TTACCTCCCGTCAGCAGTAGAGGC  | 0   | 9  | RDR2-sensitive |
| TTACCTTGCGGGACTGGTCATCGG  | 0   | 11 | RDR2-sensitive |
| TTACGACTGCATAACGATGTGTAA  | 0   | 38 | RDR2-sensitive |
| TTACGAGAACTAAA ACTATGGCAT | 0   | 9  | RDR2-sensitive |
| TTACGATACTGTTTGAAGGGGAA   | 15  | 0  | RDR2-resistant |
| TTACGCTGATAGAAAGATTGTCCT  | 75  | 1  | RDR2-resistant |
| TTACGGCTAGGACTGACTTGGCAT  | 4   | 46 | RDR2-sensitive |
| TTACTATGGTTTGGTCTCGACGAT  | 58  | 6  | RDR2-resistant |
| TTACTCCGATTATTCAAGGACTGT  | 118 | 6  | RDR2-resistant |
| TTACTGAATTTGTTGGACGGATAA  | 0   | 48 | RDR2-sensitive |
| TTACTGATCTGAACGCATGGATGT  | 0   | 24 | RDR2-sensitive |
| TTACTGCGGTATTCAACATAATAA  | 20  | 1  | RDR2-resistant |
| TTACTGTAGATATAAGCTAGGTAT  | 0   | 10 | RDR2-sensitive |
| TTACTGTAGCATCATACATCTTCC  | 0   | 17 | RDR2-sensitive |
| TTACTGTAGTGCTAGTAGTACGGT  | 0   | 12 | RDR2-sensitive |
| TTACTGTGGTTGTGACTGTGGCAT  | 0   | 22 | RDR2-sensitive |
| TTACTGTGTGTACATATGGCTGGC  | 32  | 0  | RDR2-resistant |
| TTACTGTTATTGATCGGCTCCATT  | 23  | 3  | RDR2-resistant |
| TTACTGTTCTTGTGCGATTATGGT  | 29  | 1  | RDR2-resistant |
| TTACTGTTGAAGACATATTTGCTG  | 20  | 2  | RDR2-resistant |
| TTACTTAGCATTTGATCGTCTGGT  | 23  | 0  | RDR2-resistant |
| TTACTTAGCCTTTGATCGTCTGGT  | 20  | 0  | RDR2-resistant |
| TTACTTTGATATTGTTGGCACTAA  | 48  | 8  | RDR2-resistant |
| TTACTTTGATATTGTTGGCACTGA  | 39  | 0  | RDR2-resistant |
| TTAGAACTGAATAGAACTAGCA    | 61  | 6  | RDR2-resistant |
| TTAGAACTGTACAAGTCCGGCAC   | 0   | 11 | RDR2-sensitive |
| TTAGAACTAAATAGTCTGAAGACG  | 89  | 0  | RDR2-resistant |
| TTAGAACTTTAGATTTAGACTGCT  | 41  | 3  | RDR2-resistant |
| TTAGAAGATGTTGTGCTGCTTCCT  | 21  | 1  | RDR2-resistant |
| TTAGAATTGTTGCTCTCTACGGTA  | 60  | 9  | RDR2-resistant |



|                           |     |    |                |
|---------------------------|-----|----|----------------|
| TTAGAATTTTGGAAATAGGCTGGC  | 18  | 0  | RDR2-resistant |
| TTAGACGTGTCTACTTTCCACCT   | 17  | 1  | RDR2-resistant |
| TTAGACTGGACTAAGATAAAGCTA  | 36  | 3  | RDR2-resistant |
| TTAGACTGTTGCTGACGGCTCTTT  | 0   | 12 | RDR2-sensitive |
| TTAGAGAACGTTGCTGAAGATGAT  | 0   | 12 | RDR2-sensitive |
| TTAGAGAACTGTTTAGAGGACGCT  | 0   | 11 | RDR2-sensitive |
| TTAGAGAAGACTGTAAAGGACGGA  | 0   | 10 | RDR2-sensitive |
| TTAGAGCGCGTGACCAGAGACTGT  | 0   | 39 | RDR2-sensitive |
| TTAGAGCTCGTCCTTATAGGCATC  | 22  | 0  | RDR2-resistant |
| TTAGAGCTCGTTCTTATAGGCATC  | 134 | 8  | RDR2-resistant |
| TTAGAGGAAGGAGAAGTCGTAACA  | 21  | 2  | RDR2-resistant |
| TTAGAGGACCGTTTAGAGGACGCT  | 1   | 29 | RDR2-sensitive |
| TTAGAGGACCGTTTAGAGGACGTT  | 13  | 70 | RDR2-sensitive |
| TTAGATAAGGAAAGTTGTATGGAC  | 29  | 0  | RDR2-resistant |
| TTAGATATTGTTGGTCACTTCGTC  | 14  | 0  | RDR2-resistant |
| TTAGATTCTGACCTCTTGCGCGC   | 86  | 6  | RDR2-resistant |
| TTAGATTCTGACTGTAACCGGTGT  | 0   | 9  | RDR2-sensitive |
| TTAGATTTCTTTGATGGTTCGTGGA | 27  | 1  | RDR2-resistant |
| TTAGCAAGGGATGAGCTCACTTAT  | 42  | 7  | RDR2-resistant |
| TTAGCAATCATCTAAGGAGTTGTG  | 25  | 0  | RDR2-resistant |
| TTAGCGACGGCACTTACAGCGACC  | 0   | 9  | RDR2-sensitive |
| TTAGCGTAGGGCTGCAGGAACGGC  | 0   | 69 | RDR2-sensitive |
| TTAGCTACTCTCGAACACGCGCAA  | 1   | 17 | RDR2-sensitive |
| TTAGGACAACGACACGGTCTCCAA  | 1   | 74 | RDR2-sensitive |
| TTAGGACAACGGCACGGTCTCCAA  | 0   | 10 | RDR2-sensitive |
| TTAGGACATAATGGTCTTCGGACG  | 23  | 1  | RDR2-resistant |
| TTAGGACATGATTGTGCATACCAA  | 0   | 31 | RDR2-sensitive |
| TTAGGAGTAGGACGGTGTCAACGA  | 0   | 43 | RDR2-sensitive |
| TTAGGAGTAGGACGGTGTTCGACAA | 2   | 21 | RDR2-sensitive |
| TTAGGAGTAGGACGGTGTTCGACGA | 0   | 37 | RDR2-sensitive |
| TTAGGCAACGGAACGTGTGATGGT  | 24  | 1  | RDR2-resistant |
| TTAGGCACTTGTGTTGGACACTAA  | 1   | 15 | RDR2-sensitive |
| TTAGGCCACGGAAGTTTGAGGCAT  | 37  | 3  | RDR2-resistant |
| TTAGGCCTGGTCCAAGTTCGGCAT  | 0   | 28 | RDR2-sensitive |
| TTAGGGAACGCTACTGGAGACTGA  | 0   | 9  | RDR2-sensitive |
| TTAGGGCATGTACAGTGGAGAGAC  | 0   | 16 | RDR2-sensitive |
| TTAGGGCTTGTTCGGTTACACCAA  | 1   | 17 | RDR2-sensitive |
| TTAGGGTATGTGCGGAGGGAGGGC  | 20  | 1  | RDR2-resistant |
| TTAGGGTCTGTTTGGTTGGGCTGT  | 0   | 11 | RDR2-sensitive |
| TTAGGGTTTTAGATTTTCGTCTCGA | 22  | 0  | RDR2-resistant |
| TTAGGTCGTGCTCGTAGTGGGCAT  | 0   | 11 | RDR2-sensitive |
| TTAGGTCTGATCCGAGTCCGGCAT  | 0   | 25 | RDR2-sensitive |
| TTAGGTGCAGTAGATGTGTATGGT  | 40  | 7  | RDR2-resistant |
| TTAGGTGTCTGTTAGAAAAGGTGT  | 0   | 17 | RDR2-sensitive |
| TTAGTAAAGAGTGTAGGATCGGCT  | 17  | 0  | RDR2-resistant |
| TTAGTACTGGCCTGCTTCAGACGA  | 0   | 29 | RDR2-sensitive |
| TTAGTAGATTTTGATAGAGCTGAA  | 36  | 4  | RDR2-resistant |
| TTAGTAGATTTTGATAGAGCTGAG  | 58  | 12 | RDR2-resistant |
| TTAGTATGGTATCTGATTACGGTT  | 0   | 21 | RDR2-sensitive |

|                           |     |    |                |
|---------------------------|-----|----|----------------|
| TTAGTCGATTGAATCGGTCTCGGC  | 0   | 11 | RDR2-sensitive |
| TTAGTCGGAGGTGTGTGGTCAT    | 62  | 3  | RDR2-resistant |
| TTAGTCTCTGTAGAGTGGCAGATT  | 45  | 0  | RDR2-resistant |
| TTAGTGCGACTGTGTTCAACGGGA  | 15  | 0  | RDR2-resistant |
| TTAGTGCTACGTCCGCCACGGT    | 0   | 14 | RDR2-sensitive |
| TTAGTGGACGAGGACGTGCGCAAT  | 0   | 9  | RDR2-sensitive |
| TTAGTGTAGTATCTGATTACGGTT  | 0   | 17 | RDR2-sensitive |
| TTAGTGTAGTTTGTAGGATAGCAT  | 0   | 10 | RDR2-sensitive |
| TTAGTGTGGTATCTGATTACGGTT  | 6   | 55 | RDR2-sensitive |
| TTAGTTGACGAAGACCGCTATATT  | 32  | 1  | RDR2-resistant |
| TTAGTTGACGGGTTTGATGACATG  | 26  | 4  | RDR2-resistant |
| TTAGTTGCCTGTAGTGGGACGCAT  | 0   | 10 | RDR2-sensitive |
| TTAGTTGTCGTTTTGGATAAGGTT  | 0   | 9  | RDR2-sensitive |
| TTAGTTTGATCAGCTCGTCGTCGT  | 0   | 20 | RDR2-sensitive |
| TTATAATGTATCAGTCTCAACGGT  | 17  | 0  | RDR2-resistant |
| TTATACTTCGGGCTGGCACGGCAC  | 0   | 9  | RDR2-sensitive |
| TTATATATTGCAGAGGACTACATG  | 728 | 1  | RDR2-resistant |
| TTATATCCGACGGCTGCTAGCGGC  | 0   | 10 | RDR2-sensitive |
| TTATATCTATGGCATGACTAAAAT  | 22  | 0  | RDR2-resistant |
| TTATATGCATTCTGTAGGAAGACA  | 23  | 1  | RDR2-resistant |
| TTATATTTGTAGGGATAGGATGGA  | 32  | 0  | RDR2-resistant |
| TTATCCGGCGAACGCTAAGACTGT  | 0   | 10 | RDR2-sensitive |
| TTATCGTATTAGAAACGTCGGTAC  | 1   | 12 | RDR2-sensitive |
| TTATCTTTGTGAGGTCGTTCCAGGA | 32  | 0  | RDR2-resistant |
| TTATGAACCTTGTCGGGATTGACA  | 20  | 0  | RDR2-resistant |
| TTATGACAGATTGTGGGACATTCC  | 0   | 13 | RDR2-sensitive |
| TTATGAGCCTGATAGCATACTGAC  | 0   | 16 | RDR2-sensitive |
| TTATGCCTGCAGACGATGAAGATG  | 22  | 1  | RDR2-resistant |
| TTATGGACCATCTGGAGGATTAGG  | 31  | 0  | RDR2-resistant |
| TTATGTAGAATTTGTATGCAAGCA  | 23  | 0  | RDR2-resistant |
| TTATGTATAATGACAGATGTTGGA  | 20  | 0  | RDR2-resistant |
| TTATGTATAGTACAGATCTGTGAC  | 78  | 0  | RDR2-resistant |
| TTATGTTCCGATGACTGGCATGTAA | 0   | 76 | RDR2-sensitive |
| TTATGTTTGTTAGGTCATTGTGAT  | 38  | 2  | RDR2-resistant |
| TTATGTTTTTTAGTATCTTCGGAA  | 23  | 2  | RDR2-resistant |
| TTATTAAATGTAGTCGGATTATAA  | 0   | 9  | RDR2-sensitive |
| TTATTAAATTCGGCATCACACTTC  | 32  | 2  | RDR2-resistant |
| TTATTAAGGACTATGTTATGTGGA  | 21  | 1  | RDR2-resistant |
| TTATTCAAGGACTGTTCCAGGCAAG | 185 | 6  | RDR2-resistant |
| TTATTGTAGACATGAGTTGCCAGC  | 39  | 4  | RDR2-resistant |
| TTATTGTGCTTGTGACTGTGGCAT  | 0   | 10 | RDR2-sensitive |
| TTATTTAATTAGGATCTCGGTAGA  | 24  | 0  | RDR2-resistant |
| TTATTTCCGGGCACTCGGCAAAGAG | 0   | 18 | RDR2-sensitive |
| TTATTTGCTCTGTGTCGTTGGGAG  | 38  | 0  | RDR2-resistant |
| TTCAACATGGTTGTTCCGATTCTC  | 231 | 70 | RDR2-resistant |
| TTCAACGAGGTAGACAGACGGGAC  | 0   | 12 | RDR2-sensitive |
| TTCAACGGTCGTCCTCGCATGCAT  | 0   | 12 | RDR2-sensitive |
| TTCAACGTGATTGCACAAACGGTT  | 81  | 1  | RDR2-resistant |
| TTCAACTGGATTCCGGACCGGATA  | 0   | 9  | RDR2-sensitive |

|                           |    |    |                |
|---------------------------|----|----|----------------|
| TTCAACTGTAGTCTTTGCCCGGCC  | 0  | 11 | RDR2-sensitive |
| TTCAACTGTCCACTCTGCAACGGC  | 0  | 17 | RDR2-sensitive |
| TTCAACTGTTATGCATCCATCTAG  | 91 | 6  | RDR2-resistant |
| TTCAAGGTCGTGGATATTAGCATG  | 35 | 0  | RDR2-resistant |
| TTCAATCGATGTGTAGTGTGATGG  | 29 | 0  | RDR2-resistant |
| TTCAATTAATTAGTATCTTCGGC   | 55 | 1  | RDR2-resistant |
| TTCAATTATAGTCAGAATGTTGCA  | 14 | 0  | RDR2-resistant |
| TTCACAAGTGGAGGACCCTAGACT  | 52 | 4  | RDR2-resistant |
| TTCACAGAATCGTCAAGGTGGCGC  | 22 | 2  | RDR2-resistant |
| TTCACCGGACTGTACGGTATGCAC  | 0  | 20 | RDR2-sensitive |
| TTCACCTGTAGGCAGAAGTAGCAC  | 15 | 0  | RDR2-resistant |
| TTCACGAGATCGTAGCGTTGGCAC  | 0  | 10 | RDR2-sensitive |
| TTCACGCAGGGACGGTAGAGCAAA  | 0  | 17 | RDR2-sensitive |
| TTCACGGAAGCGAACGAACGGTGC  | 0  | 12 | RDR2-sensitive |
| TTCACGGAGAGACGGCTCTAAGAT  | 2  | 36 | RDR2-sensitive |
| TTCACGGGTACGGGTTTGGGACGG  | 0  | 44 | RDR2-sensitive |
| TTCACGTCGAGCGGGTACACACGT  | 0  | 14 | RDR2-sensitive |
| TTCACTGACGTTGGATGGCTGCCT  | 18 | 0  | RDR2-resistant |
| TTCACTGTAGCGGCATGCATCTTC  | 0  | 15 | RDR2-sensitive |
| TTCACTGTTCACTGCACTCGGCAT  | 0  | 12 | RDR2-sensitive |
| TTCACTTTTGACTGACTGGCATA   | 33 | 6  | RDR2-resistant |
| TTCAGAACTGCATTTAGAACACT   | 25 | 2  | RDR2-resistant |
| TTCAGAAGATTTACAACTTAGGT   | 22 | 1  | RDR2-resistant |
| TTCAGACGACTCGAACGGCGCCTC  | 0  | 11 | RDR2-sensitive |
| TTCAGACTGGGACTAGGAAGTCGT  | 0  | 14 | RDR2-sensitive |
| TTCAGACTTAGCTAGAAGTGGTTA  | 19 | 0  | RDR2-resistant |
| TTCAGATTAGAAGTTTGCACGGTT  | 1  | 18 | RDR2-sensitive |
| TTCAGATTCGGGTCGGATACGGAG  | 0  | 11 | RDR2-sensitive |
| TTCAGATTGGTGGGTCGATACGGG  | 66 | 7  | RDR2-resistant |
| TTCAGCTCGTAGCGACTCGACGGT  | 1  | 17 | RDR2-sensitive |
| TTCAGCTTTTTCTTCGATCTTCGG  | 22 | 0  | RDR2-resistant |
| TTCAGGACTTATTTCCGACGGTTT  | 1  | 49 | RDR2-sensitive |
| TTCAGGCTGATCGGAAATAGGTAT  | 0  | 14 | RDR2-sensitive |
| TTCAGTCGTGACAAC TTGGCGGAT | 0  | 18 | RDR2-sensitive |
| TTCAGTGTCTCGGGCTCTCGGCGT  | 0  | 11 | RDR2-sensitive |
| TTCAGTTAGCGTGTTCGGTAGTGAA | 14 | 0  | RDR2-resistant |
| TTCATACGTCTGACGGCTTGTCAT  | 0  | 14 | RDR2-sensitive |
| TTCATACTGTAGAAGAGGGTACCC  | 0  | 14 | RDR2-sensitive |
| TTCATAGAGACTCAGGATCATCGG  | 43 | 2  | RDR2-resistant |
| TTCATATTTTACATGGTCGTCCAA  | 0  | 12 | RDR2-sensitive |
| TTCATCCCTCTGAATCGGACGGAC  | 0  | 10 | RDR2-sensitive |
| TTCATCTCTAGTAGGCTGGCGGAA  | 26 | 1  | RDR2-resistant |
| TTCATCTCTTGTGGGCTGCCGGAA  | 29 | 2  | RDR2-resistant |
| TTCATCTGGAAGGTGGCCTTAATT  | 17 | 0  | RDR2-resistant |
| TTCATCTTCATCGTCTGCAGGCAT  | 22 | 2  | RDR2-resistant |
| TTCATCTTGTTGGTTCGGTAAAGGT | 0  | 9  | RDR2-sensitive |
| TTCATGCGTCGCATCGAACGGTAC  | 0  | 10 | RDR2-sensitive |
| TTCATGGACTGAACGTAGATGGAA  | 0  | 11 | RDR2-sensitive |
| TTCATGGGACTGCACAGGAGACAG  | 3  | 20 | RDR2-sensitive |

|                           |     |     |                |
|---------------------------|-----|-----|----------------|
| TTCATGGTCAGCTCGGCTCGGCTC  | 0   | 13  | RDR2-sensitive |
| TTCATGGTCAGCTCGGCTCGGCTT  | 0   | 14  | RDR2-sensitive |
| TTCATGTGTAGAAGATCTTGAAGG  | 50  | 0   | RDR2-resistant |
| TTCATGTTGTATTGTATCGGTGGT  | 0   | 12  | RDR2-sensitive |
| TTCATTCGGCATAATGATTTTGAA  | 63  | 0   | RDR2-resistant |
| TTCATTCTATTATAACAGTCGTCT  | 21  | 0   | RDR2-resistant |
| TTCATTGACGACGGTGCTGATGGC  | 34  | 1   | RDR2-resistant |
| TTCATTTATGATTGTATTAGTGGG  | 23  | 0   | RDR2-resistant |
| TTCATTTGCCGGTACTGTGAGGCC  | 34  | 0   | RDR2-resistant |
| TTCATTTGGAGTCATTAGAGCATA  | 47  | 3   | RDR2-resistant |
| TTCATTTTTCTGAGGTAGTACGTA  | 61  | 0   | RDR2-resistant |
| TTCCAAAAGTGACTGACGCGACC   | 27  | 1   | RDR2-resistant |
| TTCCAACGGCACTGATGACGTGGC  | 0   | 15  | RDR2-sensitive |
| TTCCAAGGTTTCGTAGAGCAGGAG  | 0   | 18  | RDR2-sensitive |
| TTCCAATCCGTTCCGGCCTTGGCAC | 0   | 11  | RDR2-sensitive |
| TTCCACTGAAAATCTCATGCCGTT  | 20  | 0   | RDR2-resistant |
| TTCCAGCTAGGCTGTAGGGGGCAC  | 1   | 41  | RDR2-sensitive |
| TTCCAGGCTGCCTATAGACGACAC  | 2   | 15  | RDR2-sensitive |
| TTCCAGTCGCTGCTAGAGGACGTG  | 0   | 14  | RDR2-sensitive |
| TTCCAGTCGGCTGACAAGTGGTAT  | 0   | 10  | RDR2-sensitive |
| TTCCATCAACGGAGTCCGAGGGGT  | 16  | 0   | RDR2-resistant |
| TTCCATCAGTTATCTTGTCCGATG  | 18  | 0   | RDR2-resistant |
| TTCCATCTTGAACCTTTGAGGGCA  | 50  | 0   | RDR2-resistant |
| TTCCATGTAGGACTAGGACGGAAT  | 0   | 10  | RDR2-sensitive |
| TTCCCAACGGGCGGCGTGCTGAAT  | 122 | 11  | RDR2-resistant |
| TTCCCACTGTACGAATTTGTCGGC  | 15  | 0   | RDR2-resistant |
| TTCCCATGGCAGTGTAGGACGGAG  | 0   | 12  | RDR2-sensitive |
| TTCCCTTTGGATCCTTCGTTGGC   | 176 | 2   | RDR2-resistant |
| TTCCCTCCCGTCAACAGTAGAGGC  | 1   | 12  | RDR2-sensitive |
| TTCCCTCCCGTCAGCAGTAGAGAC  | 1   | 18  | RDR2-sensitive |
| TTCCCTCCCGTCAGCAGTAGAGGC  | 29  | 735 | RDR2-sensitive |
| TTCCCTCCCGTCAGCAGTAGATGC  | 0   | 11  | RDR2-sensitive |
| TTCCCTCCCGTCAGTAGTAGAGGC  | 0   | 24  | RDR2-sensitive |
| TTCCCTCGAGGACGACGCTGCCGA  | 0   | 25  | RDR2-sensitive |
| TTCCCTCTCGTCAGCAGTAGAGGC  | 1   | 33  | RDR2-sensitive |
| TTCCCTGCCTGACGGTCGGACGGT  | 0   | 9   | RDR2-sensitive |
| TTCCCTGCGACGGGTTCCGGACGGT | 0   | 9   | RDR2-sensitive |
| TTCCCTGCGTTGTATCGGACGGAC  | 0   | 27  | RDR2-sensitive |
| TTCCCTTCCGTCAGCAGTAGAGGC  | 11  | 83  | RDR2-sensitive |
| TTCCGAAGGTAGAAGTTTGCCGGA  | 290 | 25  | RDR2-resistant |
| TTCCGAATGGGCTGTCTGATAGGC  | 0   | 17  | RDR2-sensitive |
| TTCCGACGACTGTACAGATAGCGT  | 0   | 12  | RDR2-sensitive |
| TTCCGACGGCTTAAGACGGGTCCC  | 0   | 24  | RDR2-sensitive |
| TTCCGACTGACGGTGAAATGCTAT  | 0   | 12  | RDR2-sensitive |
| TTCCGAGTGACTGATTGATAGGCT  | 0   | 29  | RDR2-sensitive |
| TTCCGGAACCTTAGGCAGTGTCTTT | 45  | 3   | RDR2-resistant |
| TTCCGGACTCTGTAGGGTGTGCAC  | 1   | 19  | RDR2-sensitive |
| TTCCGGCGTCGCCCCATTGGCAC   | 14  | 0   | RDR2-resistant |
| TTCCGGCTAATGTAGATGGGAGGT  | 0   | 11  | RDR2-sensitive |

|                           |     |     |                |
|---------------------------|-----|-----|----------------|
| TCCGGGAACTGACTCAAGACGGA   | 2   | 16  | RDR2-sensitive |
| TCCGGGAAGTGGGCGCATGCATG   | 26  | 0   | RDR2-resistant |
| TCCGTAGACGAGTTGGACGGTTC   | 0   | 9   | RDR2-sensitive |
| TCCGTAGGGTCATGTGTAGGCAT   | 0   | 42  | RDR2-sensitive |
| TCCGTCAGCAGTAGAGGCGCAAG   | 0   | 20  | RDR2-sensitive |
| TCCGTCGTGGGAACCGCTTCGGC   | 0   | 9   | RDR2-sensitive |
| TTCCTATCTGATCCCGGACCACAG  | 0   | 12  | RDR2-sensitive |
| TTCCTATTAGTTGTCGTTTTAGGAC | 4   | 38  | RDR2-sensitive |
| TTCCTATTAGTTGTCGTTTTGGAT  | 6   | 25  | RDR2-sensitive |
| TTCCTCATTGTCGAGCTTGGAGGC  | 35  | 6   | RDR2-resistant |
| TTCCTCCCGTCAGCAGTAGAGGCG  | 0   | 10  | RDR2-sensitive |
| TTCCTCTGACCGGGCACGAAGTCC  | 14  | 0   | RDR2-resistant |
| TTCCTCTGGTATCACGATTGCGGT  | 59  | 1   | RDR2-resistant |
| TTCCTGCCTGACGTCCGGACGGTC  | 0   | 14  | RDR2-sensitive |
| TTCCTGTAGTGCTAGTCAGGCGTG  | 0   | 9   | RDR2-sensitive |
| TTCCTTATTTGTGAGATCGAGGAC  | 55  | 1   | RDR2-resistant |
| TTCGAAAATTGGGAGAATTTGGAT  | 31  | 4   | RDR2-resistant |
| TTCGAACTGTACTATCCGGGTAT   | 0   | 11  | RDR2-sensitive |
| TTCGAACCTCGCTCCGACAAGTAA  | 0   | 15  | RDR2-sensitive |
| TTCGAACTGATGAAGAGCAGCATC  | 42  | 0   | RDR2-resistant |
| TTCGAATCAAGAACAAGACAACAT  | 0   | 9   | RDR2-sensitive |
| TTCGACTGCGGGTACAACGCCATC  | 45  | 1   | RDR2-resistant |
| TTCGACTTTAGTGCACGGTTCTGC  | 0   | 13  | RDR2-sensitive |
| TTCGAGAACTGTTAGTGCATTTTA  | 18  | 1   | RDR2-resistant |
| TTCGAGAGAACGGTCATCCTGGAT  | 18  | 1   | RDR2-resistant |
| TTCGATCCGAGGGTGCATGCGGCT  | 32  | 4   | RDR2-resistant |
| TTCGATCTACTTTACAACCGGCAT  | 27  | 1   | RDR2-resistant |
| TTCGATGACTCACCAGAACGACGC  | 0   | 10  | RDR2-sensitive |
| TTCGATGACTCGCCAGAACGACAC  | 0   | 9   | RDR2-sensitive |
| TTCGATGACTCGCCAGAACGACGC  | 3   | 113 | RDR2-sensitive |
| TTCGCAGGCAGAGATTCAGTCATT  | 14  | 0   | RDR2-resistant |
| TTCGCGGCGTAGGCAGGCGAGCGT  | 0   | 11  | RDR2-sensitive |
| TTCGCGGGTATGGATATAGGCTAT  | 1   | 12  | RDR2-sensitive |
| TTCGCGTTAGGGTCTGTTTGGCAT  | 0   | 15  | RDR2-sensitive |
| TTCGCTATCTGGACCTGACGGGCC  | 0   | 20  | RDR2-sensitive |
| TTCGCTCGTCAACTTGTCGTCGT   | 0   | 16  | RDR2-sensitive |
| TTCGCTGCTGAACTCTATCACGGA  | 26  | 0   | RDR2-resistant |
| TTCGGAATTTTCTCGGTCCGAAC   | 0   | 11  | RDR2-sensitive |
| TTCGGAACGAAGTTGCTCAGGGC   | 0   | 9   | RDR2-sensitive |
| TTCGGAACTTTTAATGTTGATGTC  | 48  | 8   | RDR2-resistant |
| TTCGGAAGAACGGTCATCCTGGAC  | 332 | 1   | RDR2-resistant |
| TTCGGAAGACTGGCACAAAGCCGA  | 0   | 13  | RDR2-sensitive |
| TTCGGAATGAGTGACGTGCGGCAA  | 1   | 12  | RDR2-sensitive |
| TTCGGAATGGGTGACGTGCGACAA  | 1   | 26  | RDR2-sensitive |
| TTCGGAATGGGTGACGTGCGGCAA  | 0   | 40  | RDR2-sensitive |
| TTCGGACAACCCGTTGTATGGCTT  | 24  | 1   | RDR2-resistant |
| TTCGGACAGAAAAGTAGCCACGGT  | 0   | 10  | RDR2-sensitive |
| TTCGGACCGTGCCGTGCCGTGCAT  | 0   | 12  | RDR2-sensitive |
| TTCGGACCTCTCTGAGTGGGACGC  | 0   | 11  | RDR2-sensitive |

|                           |     |    |                |
|---------------------------|-----|----|----------------|
| TTCGGACGCCTGGCTCGATGGCCC  | 0   | 9  | RDR2-sensitive |
| TTCGGACGCTACAGGTAGAGGCAC  | 0   | 43 | RDR2-sensitive |
| TTCGGACGGTCCGTGATGACGCAT  | 0   | 16 | RDR2-sensitive |
| TTCGGACTCAAGTCGGTATCACAG  | 0   | 11 | RDR2-sensitive |
| TTCGGACTCGAGTCGGTATCACAG  | 0   | 9  | RDR2-sensitive |
| TTCGGAGATAGAGCGGAAGACTTT  | 0   | 11 | RDR2-sensitive |
| TTCGGAGCGACGCAAGGAAGACGT  | 0   | 10 | RDR2-sensitive |
| TTCGGAGTTTGAAGCTAGAGGTGT  | 25  | 1  | RDR2-resistant |
| TTCGGATAACGGATACGAATACGG  | 0   | 10 | RDR2-sensitive |
| TTCGGATCTGGTAGTTTAGCGGCA  | 55  | 0  | RDR2-resistant |
| TTCGGATGGAGGCGGAGTTGGCAA  | 0   | 9  | RDR2-sensitive |
| TTCGGATGTTGATGCGAGGAAGGA  | 17  | 0  | RDR2-resistant |
| TTCGGATTCGGGTCAGATACGGAA  | 0   | 9  | RDR2-sensitive |
| TTCGGATTCGGGTCGGATACGGAA  | 0   | 29 | RDR2-sensitive |
| TTCGGATTCGGGTCGGATACGGAG  | 4   | 46 | RDR2-sensitive |
| TTCGGCAACGGACTGGACAGGTGC  | 0   | 18 | RDR2-sensitive |
| TTCGGCACGACACGGGCATGATTC  | 0   | 10 | RDR2-sensitive |
| TTCGGCACTGATAATTTGTTCGGC  | 1   | 28 | RDR2-sensitive |
| TTCGGCAGCATAACGGCAGGACAA  | 2   | 14 | RDR2-sensitive |
| TTCGGCAGGACGATATGCAAGCAG  | 0   | 10 | RDR2-sensitive |
| TTCGGCAGTTGACAAGGCAACACT  | 20  | 2  | RDR2-resistant |
| TTCGGCATCTGTTTTTCTGCGGC   | 158 | 9  | RDR2-resistant |
| TTCGGCCTTGTCGTCAGACATCTT  | 25  | 2  | RDR2-resistant |
| TTCGGCGCTTGCTTCTGAGAAGAC  | 0   | 11 | RDR2-sensitive |
| TTCGGCGGACCATTACGCGCATG   | 0   | 13 | RDR2-sensitive |
| TTCGGCTAAAATTCACCGGACTGT  | 3   | 16 | RDR2-sensitive |
| TTCGGCTCGGTA CTGGCACGGCCC | 0   | 13 | RDR2-sensitive |
| TTCGGCTGCATGTGAAGATGACAT  | 0   | 11 | RDR2-sensitive |
| TTCGGCTGGATAGTTTTTTCGGAT  | 0   | 11 | RDR2-sensitive |
| TTCGGGACCGGATACGGATAGTTA  | 0   | 9  | RDR2-sensitive |
| TTCGGGACCTGGACGCAGGAGCGA  | 1   | 18 | RDR2-sensitive |
| TTCGGGACGGATACAGGACGGGAC  | 0   | 17 | RDR2-sensitive |
| TTCGGGATCGGAGTAATGATTAAT  | 14  | 0  | RDR2-resistant |
| TTCGGGATGAACACGAGAGGACAC  | 0   | 13 | RDR2-sensitive |
| TTCGGGCACTCGGCAAAGACGTAT  | 0   | 15 | RDR2-sensitive |
| TTCGGGCCAGCACGAGCACGACAC  | 0   | 9  | RDR2-sensitive |
| TTCGGGCCAGCACGAGCACGGCAC  | 0   | 13 | RDR2-sensitive |
| TTCGGGCCGCTTAGAGATGCGTAA  | 0   | 9  | RDR2-sensitive |
| TTCGGGCCGTA CTAGCACGGATTT | 0   | 19 | RDR2-sensitive |
| TTCGGGCTAGTTTGGCAGCAACGT  | 0   | 17 | RDR2-sensitive |
| TTCGGGGTAGGACGATGATGGCGC  | 0   | 10 | RDR2-sensitive |
| TTCGGGGTATTAATGTAGTCGGA   | 0   | 13 | RDR2-sensitive |
| TTCGGGTATTAATGTAGTCGGAT   | 0   | 13 | RDR2-sensitive |
| TTCGGGTCCGAGCAGAACGACACA  | 0   | 10 | RDR2-sensitive |
| TTCGGGTCCGATACGGATACCCGG  | 0   | 10 | RDR2-sensitive |
| TTCGGGTGGTTACAGATCGCAGGA  | 0   | 14 | RDR2-sensitive |
| TTCGGTATTATTGAAAATGGTCGT  | 76  | 10 | RDR2-resistant |
| TTCGGTCGTAGCGCGAGATGGCAC  | 0   | 20 | RDR2-sensitive |
| TTCGGTCTATTAGGGTAATTCGGT  | 3   | 47 | RDR2-sensitive |

|                           |     |    |                |
|---------------------------|-----|----|----------------|
| TTCGGTGAAGTGTATATCGGCAAC  | 0   | 13 | RDR2-sensitive |
| TTCGGTGCAGGATCTCGAAGGCAA  | 0   | 10 | RDR2-sensitive |
| TTCGGTTAGGTCATGTTAGTCGGG  | 0   | 16 | RDR2-sensitive |
| TTCGGTTCGGTCTATTCGGTCCAC  | 0   | 31 | RDR2-sensitive |
| TTCGGTTTTTTCGGTAGTTCGGTT  | 3   | 19 | RDR2-sensitive |
| TTCGTACAGTAGGAAGTGAGGCGT  | 1   | 19 | RDR2-sensitive |
| TTCGTACCAAACGGATTCCGGGCAT | 0   | 13 | RDR2-sensitive |
| TTCGTACGAGCAGCTGGGTTGGAG  | 61  | 2  | RDR2-resistant |
| TTCGTACGTCGTGTGTAGAGATGG  | 0   | 16 | RDR2-sensitive |
| TTCGTAGAGCAGGAGGGGAAGGGA  | 0   | 15 | RDR2-sensitive |
| TTCGTCCTGTGGAGAGGTTAGTCC  | 0   | 18 | RDR2-sensitive |
| TTCGTCGCCGAAGGTCTTGTAGGA  | 0   | 10 | RDR2-sensitive |
| TTCGTGACTTGACGCAGGAGCGAC  | 0   | 24 | RDR2-sensitive |
| TTCGTGAGAGATCTAGGTCGTCGT  | 2   | 15 | RDR2-sensitive |
| TTCGTGAGAGGTCTAGGTCGTCGT  | 1   | 20 | RDR2-sensitive |
| TTCGTGCCGGACCATGCATTGGAC  | 0   | 10 | RDR2-sensitive |
| TTCGTGGACCTAAGTGGCATTCT   | 23  | 3  | RDR2-resistant |
| TTCGTGTCAGCTGTGGAACGGTA   | 3   | 18 | RDR2-sensitive |
| TTCGTGTGAGCTCGTGAGCCGGAT  | 0   | 16 | RDR2-sensitive |
| TTCGTGTTGGACCGTGCTTCGGGC  | 0   | 9  | RDR2-sensitive |
| TTCGTTCTTAGGCTCAGCGGCAAT  | 138 | 15 | RDR2-resistant |
| TTCGTTGATTCTAGTAGTGTGCAT  | 0   | 10 | RDR2-sensitive |
| TTCGTTGCTACTGTATAAAGACGT  | 0   | 12 | RDR2-sensitive |
| TTCGTTGTAGGATCTCGAAGACGA  | 0   | 10 | RDR2-sensitive |
| TTCGTTTACTGTAGTGATGCACGG  | 0   | 11 | RDR2-sensitive |
| TTCGTTTACTGTAGTGTATGACGG  | 0   | 16 | RDR2-sensitive |
| TTCGTTTATTGTAGTGCAAGCCGG  | 0   | 14 | RDR2-sensitive |
| TTCGTTTTAGTTGTGCTGGATAG   | 1   | 31 | RDR2-sensitive |
| TTCTAACGGCTGGTCTCGGTAACC  | 32  | 2  | RDR2-resistant |
| TTCTAAGCGAGGATCTGGAGGAAC  | 0   | 10 | RDR2-sensitive |
| TTCTAAGCGAGGATCTGGAGGAGC  | 0   | 50 | RDR2-sensitive |
| TTCTAATACGATAAGTTCGACGGT  | 0   | 16 | RDR2-sensitive |
| TTCTAATACTGTAAGTTCGACGGT  | 0   | 57 | RDR2-sensitive |
| TTCTAATACTGTAAGTTTGACGGT  | 0   | 54 | RDR2-sensitive |
| TTCTAATGTCCAGCCTGTCCGGTAT | 0   | 10 | RDR2-sensitive |
| TTCTACCGGATTGATGGGTCCGAA  | 0   | 14 | RDR2-sensitive |
| TTCTACCGGATTGGTGGGTCCGAA  | 0   | 13 | RDR2-sensitive |
| TTCTACCTGTAGGACCTTCGGCGA  | 0   | 9  | RDR2-sensitive |
| TTCTACTTGGGGATTTGTGGTGAT  | 23  | 0  | RDR2-resistant |
| TTCTAGCACGGCACAGATCTGGCA  | 0   | 15 | RDR2-sensitive |
| TTCTAGCTCGGGCAGATTCAGCGT  | 0   | 16 | RDR2-sensitive |
| TTCTAGGCTCCGAACGGTGTGCAT  | 0   | 19 | RDR2-sensitive |
| TTCTATAGGATCGTACCGTTGCAT  | 341 | 64 | RDR2-resistant |
| TTCTATAGGATTGTACCGTTGCAT  | 82  | 28 | RDR2-resistant |
| TTCTATCATGCCACCGGACAGGCT  | 36  | 0  | RDR2-resistant |
| TTCTATCCTTCGTCGGCCAACCGC  | 0   | 11 | RDR2-sensitive |
| TTCTATCGGGCACTCAGCGAAGAC  | 0   | 15 | RDR2-sensitive |
| TTCTATGCGAGACTGGACCGGCC   | 0   | 17 | RDR2-sensitive |
| TTCTATTATAACAGTCGTCTGAAT  | 62  | 0  | RDR2-resistant |

|                           |    |    |                |
|---------------------------|----|----|----------------|
| TTCTATTTGAGATCACAGGGCATT  | 17 | 0  | RDR2-resistant |
| TTCTCATACTGATTCTTGGGACAC  | 14 | 0  | RDR2-resistant |
| TTCTCCCGTCAGCAGTAGAGGCGC  | 0  | 57 | RDR2-sensitive |
| TTCTCCGAAGCGGACTGACGGTGT  | 0  | 20 | RDR2-sensitive |
| TTCTCGATCTTCAAAGCTTGCATA  | 22 | 0  | RDR2-resistant |
| TTCTCGCGCCTAATCTGCTGACGG  | 0  | 10 | RDR2-sensitive |
| TTCTCGCGCCTCTACTGCTGACGG  | 2  | 14 | RDR2-sensitive |
| TTCTCGGACACTCGGCAAAGAGGT  | 3  | 28 | RDR2-sensitive |
| TTCTCGGACAGTCGGCAAACGTCAC | 0  | 10 | RDR2-sensitive |
| TTCTCGGGATCGTTTCGACGACGCA | 0  | 10 | RDR2-sensitive |
| TTCTCGGGCACTCGGCAAAGAAAA  | 1  | 12 | RDR2-sensitive |
| TTCTCGGGCACTCGGCAAAGAGGT  | 7  | 52 | RDR2-sensitive |
| TTCTCGGGCACTCGGCAAAGATGT  | 1  | 41 | RDR2-sensitive |
| TTCTCGTGAAGTGCAGCGCGGCAT  | 0  | 20 | RDR2-sensitive |
| TTCTCGTGAAGTGCAGCGCGTCAT  | 0  | 28 | RDR2-sensitive |
| TTCTCGTGAAGTGTGTCGTTGCAT  | 0  | 12 | RDR2-sensitive |
| TTCTCGTTGAGCTCATCTTAGGAC  | 14 | 0  | RDR2-resistant |
| TTCTCGTTGGCGCGCATAGCACAT  | 0  | 16 | RDR2-sensitive |
| TTCTCGTTGTGGGCTGCAAGCGGT  | 1  | 15 | RDR2-sensitive |
| TTCTCTCCCGTCAGCAGTAGAGGC  | 6  | 36 | RDR2-sensitive |
| TTCTCTCTCGTCAGCAGTAGAGGC  | 0  | 18 | RDR2-sensitive |
| TTCTCTCTCGTCAGCAGTAGAGGT  | 0  | 10 | RDR2-sensitive |
| TTCTCTGACGAGTGTGTAGGACGG  | 0  | 15 | RDR2-sensitive |
| TTCTCTGATCTGCAGCGATGACAC  | 0  | 14 | RDR2-sensitive |
| TTCTCTGCCTGACGGCCGGACGGT  | 0  | 15 | RDR2-sensitive |
| TTCTCTGCGGACGGCGATTTCCGA  | 0  | 9  | RDR2-sensitive |
| TTCTCTGCGTATGTCTGGACGGTC  | 1  | 14 | RDR2-sensitive |
| TTCTCTGGCTCTGTGACGGTGACC  | 0  | 9  | RDR2-sensitive |
| TTCTCTGTGGATAGATGGCAGTT   | 15 | 0  | RDR2-resistant |
| TTCTCTGTGTTAAGTCGAACGGTC  | 0  | 13 | RDR2-sensitive |
| TTCTCTTCCGTCAGCAGTAGAGGC  | 0  | 14 | RDR2-sensitive |
| TTCTGAACAGGTCTGGCACGCTAC  | 0  | 10 | RDR2-sensitive |
| TTCTGAACCTCGTGCATTGTAGCT  | 14 | 0  | RDR2-resistant |
| TTCTGAAGTGAAGGTGAGGCTGA   | 25 | 0  | RDR2-resistant |
| TTCTGACGAACTGTTGAGGACGAC  | 3  | 19 | RDR2-sensitive |
| TTCTGACGTGTTGCTGAAATGGAA  | 0  | 11 | RDR2-sensitive |
| TTCTGACTATAGCTTGACGTTGCC  | 18 | 1  | RDR2-resistant |
| TTCTGAGAAGCAGCTGAACTGATA  | 1  | 14 | RDR2-sensitive |
| TTCTGAGGGGCAACGGTACACTAA  | 48 | 0  | RDR2-resistant |
| TTCTGAGTTCTGGCCCTGCATAAG  | 14 | 0  | RDR2-resistant |
| TTCTGATATCGGATGACACATGGC  | 18 | 0  | RDR2-resistant |
| TTCTGATCTGAACTGTTTGGCAC   | 0  | 10 | RDR2-sensitive |
| TTCTGATCTTGATGTGGATGGCA   | 38 | 0  | RDR2-resistant |
| TTCTGATTAGAGTTATGATTTGGA  | 23 | 0  | RDR2-resistant |
| TTCTGCACAGCTGGCGAACCAAC   | 0  | 10 | RDR2-sensitive |
| TTCTGCACCTGACGTCGCCGGCGA  | 0  | 10 | RDR2-sensitive |
| TTCTGCACTTTAGGATAAGACGAC  | 0  | 10 | RDR2-sensitive |
| TTCTGCATCTTAGACGACTTCTG   | 0  | 15 | RDR2-sensitive |
| TTCTGCCACTGGCGCGCTCGGCAT  | 0  | 19 | RDR2-sensitive |



|                           |     |    |                |
|---------------------------|-----|----|----------------|
| TTCTGCCGGATTGGTGGGTCGGAA  | 0   | 11 | RDR2-sensitive |
| TTCTGCCTGACCAGACGAACGGAC  | 0   | 14 | RDR2-sensitive |
| TTCTGCGTAGTTTTAGGTCTGGAT  | 43  | 0  | RDR2-resistant |
| TTCTGCTGAGCGCGGACGGTCCGC  | 7   | 27 | RDR2-sensitive |
| TTCTGCTGCGGGCTGTACGGCGTG  | 14  | 0  | RDR2-resistant |
| TTCTGCTGGATTGGTGGGTCGGAA  | 0   | 15 | RDR2-sensitive |
| TTCTGGCACGACACAGATCTGGCA  | 0   | 9  | RDR2-sensitive |
| TTCTGGCCGCCAGAAGCTGAAGCT  | 0   | 14 | RDR2-sensitive |
| TTCTGGGCTCTGAATGGTGTGCAC  | 1   | 13 | RDR2-sensitive |
| TTCTGGGCTTGTGTGAGATGGTGC  | 0   | 12 | RDR2-sensitive |
| TTCTGGTTCTGGCTCGAGCGGATT  | 1   | 19 | RDR2-sensitive |
| TTCTGTAAATTAGGACGCGCGAAT  | 0   | 15 | RDR2-sensitive |
| TTCTGTAATGACGGTCTGTAACCT  | 0   | 18 | RDR2-sensitive |
| TTCTGTACTAGTTTGAGGATGCTT  | 14  | 0  | RDR2-resistant |
| TTCTGTAGCACCGCCCATGTACGG  | 0   | 10 | RDR2-sensitive |
| TTCTGTAGCGGGTGAGACGTTGAG  | 0   | 10 | RDR2-sensitive |
| TTCTGTATCTCGGGAGCCAGGCC   | 0   | 13 | RDR2-sensitive |
| TTCTGTCGCAAGCTCGTTGGCCAC  | 0   | 17 | RDR2-sensitive |
| TTCTGTCGCAAGCTCGTTGGTCAC  | 1   | 74 | RDR2-sensitive |
| TTCTGTCGGATTGGTGGGTCGGAA  | 1   | 18 | RDR2-sensitive |
| TTCTGTCTGACGGACCGAACGGTT  | 0   | 9  | RDR2-sensitive |
| TTCTGTGCACTCGCGGACGGTCTGT | 0   | 27 | RDR2-sensitive |
| TTCTGTGGACCTCGGCGAGCGCGG  | 0   | 11 | RDR2-sensitive |
| TTCTGTGGAGCCAGGCTGAGAGGC  | 1   | 16 | RDR2-sensitive |
| TTCTGTTCCATGTATCGGCGCTCT  | 0   | 9  | RDR2-sensitive |
| TTCTTAAGACAGTAGTGTAGGCGT  | 0   | 18 | RDR2-sensitive |
| TTCTTAGAGGGACTATGGCCGTTT  | 15  | 0  | RDR2-resistant |
| TTCTTAGGCTGTGCTCGGGCGGTT  | 0   | 12 | RDR2-sensitive |
| TTCTTACATGTAGATTCGTTAGT   | 277 | 29 | RDR2-resistant |
| TTCTTCATACTGTAGTAGGGGTAC  | 0   | 10 | RDR2-sensitive |
| TTCTTCATGTGCGGCATCCTGACC  | 32  | 0  | RDR2-resistant |
| TTCTTCCTGCAGGACCTTCGGCGA  | 3   | 36 | RDR2-sensitive |
| TTCTTCGCGGATACGGATTTAGAC  | 0   | 14 | RDR2-sensitive |
| TTCTTGACGCGATCGACGACGGAG  | 31  | 0  | RDR2-resistant |
| TTCTTGCGCCTCTACTGCTGACGG  | 6   | 28 | RDR2-sensitive |
| TTCTTGCTGACGCGCGGAACGACG  | 1   | 13 | RDR2-sensitive |
| TTCTTGGTCTTTGAACTAGAGGTG  | 0   | 11 | RDR2-sensitive |
| TTCTTTAGGTTTCGTGCTGGGCATT | 17  | 0  | RDR2-resistant |
| TTCTTTCACAGGTCAGAACGTCGT  | 0   | 13 | RDR2-sensitive |
| TTCTTTCCACAGGATGTAGACGG   | 0   | 17 | RDR2-sensitive |
| TTCTTTCTCTCGGGATCCTCGGTC  | 0   | 13 | RDR2-sensitive |
| TTCTTTCTCTTCGATTTGCTCGGC  | 35  | 1  | RDR2-resistant |
| TTCTTTCTGCAGGACCTTCGGCGA  | 0   | 24 | RDR2-sensitive |
| TTCTTTCTGTTTGGACAGTCCGC   | 155 | 11 | RDR2-resistant |
| TTCTTTGTTTGTGGAATTCGTCGC  | 22  | 0  | RDR2-resistant |
| TTCTTTTCTGATAGACCAAGTCGT  | 204 | 12 | RDR2-resistant |
| TTCTTTTGTTTCATGTTGGATTAC  | 25  | 3  | RDR2-resistant |
| TTCTTTTATGTTGTCGCTGGATAG  | 2   | 27 | RDR2-sensitive |
| TTCTTTTATGTTGTCGTTGGATAG  | 0   | 10 | RDR2-sensitive |

|                           |     |    |                |
|---------------------------|-----|----|----------------|
| TTCTTTTTATTAGTCGCTGGATAG  | 3   | 27 | RDR2-sensitive |
| TTCTTTTTATTTGTCGCTGGATAG  | 8   | 33 | RDR2-sensitive |
| TTCTTTTTATTTGTCGTTGGATAG  | 0   | 12 | RDR2-sensitive |
| TTGAAAAAGGTGAAAGACATCAGT  | 81  | 3  | RDR2-resistant |
| TTGAAATCGAATACGGATACAAAT  | 30  | 0  | RDR2-resistant |
| TTGAAATCGGTTGAATTCGGTATC  | 40  | 4  | RDR2-resistant |
| TTGAACGACTGGTGCAGACGGTGC  | 40  | 2  | RDR2-resistant |
| TTGAAGAGCCAAGTAGAACGGAGC  | 0   | 11 | RDR2-sensitive |
| TTGAAGAGCCAAGTAGAACGGAGT  | 0   | 11 | RDR2-sensitive |
| TTGAAGATTTGAACTTGAAGGCA   | 18  | 0  | RDR2-resistant |
| TTGAAGCAGTGGACAGTCTCCTAG  | 17  | 0  | RDR2-resistant |
| TTGAAGCATTGATTGATTTGGAC   | 34  | 2  | RDR2-resistant |
| TTGAAGGATGTTATGGACTGGCAT  | 0   | 12 | RDR2-sensitive |
| TTGAAGGATTTATAGTAGATACGG  | 0   | 13 | RDR2-sensitive |
| TTGAAGTAGATCTTGAAGATGGAT  | 15  | 0  | RDR2-resistant |
| TTGAATACTCGATATGCTTTGGAC  | 18  | 0  | RDR2-resistant |
| TTGAATAGAACCCCAAGAGCGGCT  | 14  | 0  | RDR2-resistant |
| TTGAATAGGTCGGTATCAATTTCT  | 17  | 1  | RDR2-resistant |
| TTGAATATATATGCAGAATTCATT  | 31  | 0  | RDR2-resistant |
| TTGAATGATTGTATGTAGATGGCT  | 33  | 0  | RDR2-resistant |
| TTGAATTCGGTCTCGGTCCGGTCAT | 0   | 16 | RDR2-sensitive |
| TTGAATTCGGTCTCGGTTGGTCAT  | 0   | 13 | RDR2-sensitive |
| TTGAATTCGGGCTGTGCCAGGCT   | 0   | 10 | RDR2-sensitive |
| TTGACACTCGGCAAAGACTGACGG  | 1   | 23 | RDR2-sensitive |
| TTGACACTGCGGACGGTGAGAGGC  | 0   | 9  | RDR2-sensitive |
| TTGACATGGAAAGTTTGAGGCGTA  | 14  | 0  | RDR2-resistant |
| TTGACCAAGCACGAGATTCTGATT  | 0   | 10 | RDR2-sensitive |
| TTGACCCCTGAACTGCCGACAGCAT | 32  | 0  | RDR2-resistant |
| TTGACCTCGGAACACTTAGGGCAT  | 0   | 12 | RDR2-sensitive |
| TTGACGCCGTTGGATTTGAGGGGA  | 35  | 2  | RDR2-resistant |
| TTGACGGGTCGGTCTGAAACACGG  | 0   | 25 | RDR2-sensitive |
| TTGACGGTTTTATCTAGAGCGCAC  | 0   | 10 | RDR2-sensitive |
| TTGACTCGTTGGTGACATCGGCTT  | 0   | 9  | RDR2-sensitive |
| TTGACTCTAACCTTGCTACCGACG  | 26  | 0  | RDR2-resistant |
| TTGACTGATTGGTATGGTGAAT    | 44  | 0  | RDR2-resistant |
| TTGACTGTCGCGTGCCTTTGCAGT  | 37  | 4  | RDR2-resistant |
| TTGACTGTCTAAAATATTCGGTAA  | 0   | 9  | RDR2-sensitive |
| TTGACTGTCTGTTGCAAAGGCTAC  | 0   | 14 | RDR2-sensitive |
| TTGACTGTGAAGCCGGAGATTGCA  | 19  | 0  | RDR2-resistant |
| TTGACTTTAAATTGAACTAACGGC  | 161 | 12 | RDR2-resistant |
| TTGACTTTAGGTACCCAAACGGTT  | 38  | 7  | RDR2-resistant |
| TTGAGACTGGATAGATATGTGCAT  | 0   | 9  | RDR2-sensitive |
| TTGAGAGTAGTGAAAGGCGGGCTG  | 36  | 2  | RDR2-resistant |
| TTGAGAGTCTTTTCTTTAGTCGGG  | 25  | 0  | RDR2-resistant |
| TTGAGATCTACGGACCCGAGGCAC  | 0   | 10 | RDR2-sensitive |
| TTGAGATTGTTCCAGGAGATGAGA  | 20  | 2  | RDR2-resistant |
| TTGAGCATCGTTGGACAATGGTTA  | 127 | 11 | RDR2-resistant |
| TTGAGCTTGA CTCTAGTCCGACTT | 27  | 1  | RDR2-resistant |
| TTGAGGAGCCAAGTAGAACGGAGC  | 0   | 21 | RDR2-sensitive |

|                           |     |    |                |
|---------------------------|-----|----|----------------|
| TTGAGGAGCCAAGTAGAACGGAGT  | 1   | 24 | RDR2-sensitive |
| TTGAGGCATAACTGGGGACGACAC  | 1   | 24 | RDR2-sensitive |
| TTGAGGGACAACAGGGGACAACAC  | 1   | 61 | RDR2-sensitive |
| TTGAGGTATTGTAAACTGCGGTAT  | 0   | 9  | RDR2-sensitive |
| TTGAGTCTGTTCTAAGCATCTATC  | 37  | 0  | RDR2-resistant |
| TTGAGTCTTGTGTATTGAAGCATT  | 16  | 0  | RDR2-resistant |
| TTGAGTTTCAAATTAGATCTCGGT  | 101 | 6  | RDR2-resistant |
| TTGATCCTTCGATGTCGGCTCTTC  | 51  | 3  | RDR2-resistant |
| TTGATCGGAGGCAGAACAGCAGAA  | 0   | 9  | RDR2-sensitive |
| TTGATGATCGTTCTTTTTGGCCAA  | 29  | 1  | RDR2-resistant |
| TTGATGGACCAACCCGAAGCTCGA  | 0   | 10 | RDR2-sensitive |
| TTGATGGACCGGCACGAAGCACGA  | 0   | 27 | RDR2-sensitive |
| TTGATGGACCTCTCTCGTTTGGAC  | 0   | 13 | RDR2-sensitive |
| TTGATGGACTGTTTGGTAGGGTTG  | 22  | 2  | RDR2-resistant |
| TTGATGGATGTAGATGGACGGTGT  | 0   | 28 | RDR2-sensitive |
| TTGATGGGCGGTACGGTATGGAAA  | 28  | 0  | RDR2-resistant |
| TTGATGGGCTGACCCGAAGCACGG  | 0   | 13 | RDR2-sensitive |
| TTGATGGTGCGGGGATGGGCGTTG  | 28  | 0  | RDR2-resistant |
| TTGATGTATCGTGAGGTTGGCTAC  | 18  | 1  | RDR2-resistant |
| TTGATGTCAAGTTACTGCGGTATT  | 36  | 1  | RDR2-resistant |
| TTGATGTGGTTTATTATAGTTGGA  | 19  | 1  | RDR2-resistant |
| TTGATGTGTAGAGCAATGTCGGTG  | 18  | 1  | RDR2-resistant |
| TTGATGTTGTTTTAGAGGATGGTA  | 24  | 0  | RDR2-resistant |
| TTGATTGTAGCTATTGGCTCCTGC  | 42  | 0  | RDR2-resistant |
| TTGATTGTAGCTATTGGCTCTTGC  | 86  | 6  | RDR2-resistant |
| TTGATTGTGTGTCGTCGGTTTTGC  | 15  | 0  | RDR2-resistant |
| TTGATTTTGTGTCGTCGTTGTCAT  | 0   | 12 | RDR2-sensitive |
| TTGCAACGGATGGCACTTGTACAC  | 0   | 42 | RDR2-sensitive |
| TTGCAACTTATGGTCTGTCGGTAA  | 0   | 12 | RDR2-sensitive |
| TTGCAAGCATTAGGTCGTTTCTGA  | 0   | 11 | RDR2-sensitive |
| TTGCAATGACAGGACGGGACGGGA  | 0   | 13 | RDR2-sensitive |
| TTGCAATGACAGGACGGGATGGGA  | 0   | 11 | RDR2-sensitive |
| TTGCACAGAAGGACTGCTTGATA   | 0   | 10 | RDR2-sensitive |
| TTGCACGAAGGCGAGGGTCTCGAC  | 16  | 0  | RDR2-resistant |
| TTGCACGCTTGACACAGAAGGACTG | 0   | 15 | RDR2-sensitive |
| TTGCACGGTCTGAGGCACTATTGC  | 0   | 32 | RDR2-sensitive |
| TTGCACTGTAGTAGACTGCATTGT  | 0   | 16 | RDR2-sensitive |
| TTGCAGAGCGGCAAGTTAGAGCGA  | 0   | 23 | RDR2-sensitive |
| TTGCAGATGAACGGACCTGGATGT  | 0   | 64 | RDR2-sensitive |
| TTGCAGATGGACGGACCTGGATGC  | 0   | 42 | RDR2-sensitive |
| TTGCAGATGGATGGACCTGGATGT  | 0   | 14 | RDR2-sensitive |
| TTGCAGCTGCAGCAGTCCAAACAG  | 0   | 10 | RDR2-sensitive |
| TTGCAGGACTAGCGGCGAAGACGC  | 0   | 10 | RDR2-sensitive |
| TTGCAGGATGATATAACAATGTTT  | 0   | 9  | RDR2-sensitive |
| TTGCAGGATGATATAACAATGTTT  | 32  | 1  | RDR2-resistant |
| TTGCAGGATGGCAGAACGGCAGAA  | 0   | 10 | RDR2-sensitive |
| TTGCATAAGGGAATTCGTGGTGAT  | 16  | 0  | RDR2-resistant |
| TTGCATACAAATTCTACATGACAC  | 20  | 0  | RDR2-resistant |
| TTGCATAGTAGGACACTCGGCATA  | 0   | 12 | RDR2-sensitive |

|                           |     |     |                |
|---------------------------|-----|-----|----------------|
| TTGCATGCCGGCTGTAGAGGGGCAC | 0   | 13  | RDR2-sensitive |
| TTGCATGCCGGCTGTAGGGGGGCAC | 0   | 14  | RDR2-sensitive |
| TTGCATGCGGCATGTAGGGAGCAT  | 0   | 10  | RDR2-sensitive |
| TTGCATGCGGCCTGTAGGGGGGCAC | 0   | 36  | RDR2-sensitive |
| TTGCATGCGGCGCGTAGGGGGGCAC | 1   | 35  | RDR2-sensitive |
| TTGCATGCTGACTGTAGGAGGCAC  | 0   | 28  | RDR2-sensitive |
| TTGCATGTCGGCTGTAGGAGGCAC  | 0   | 10  | RDR2-sensitive |
| TTGCATGTCGGCTGTAGGGGGGCAC | 0   | 67  | RDR2-sensitive |
| TTGCATGTCGGCTGTAGGGGGGCAT | 0   | 11  | RDR2-sensitive |
| TTGCATGTCGGCTGTAGGGGGGCC  | 0   | 11  | RDR2-sensitive |
| TTGCATTATGGATTTTGTTCGGA   | 14  | 0   | RDR2-resistant |
| TTGCATTGTAGTAGATCGACGGGC  | 0   | 13  | RDR2-sensitive |
| TTGCATTTGCGGCTGGCATGGCAC  | 0   | 11  | RDR2-sensitive |
| TTGCCACTGGTGAAGCTGACGGAT  | 0   | 11  | RDR2-sensitive |
| TTGCCAACGTTTCGTATCTGGACT  | 32  | 3   | RDR2-resistant |
| TTGCCCTCTGTAAGCTGAATGCGT  | 0   | 34  | RDR2-sensitive |
| TTGCCGAGTGCTTTTTGTTCGGGCA | 0   | 22  | RDR2-sensitive |
| TTGCCGAGTGTTTTTGTTCGGGCA  | 0   | 10  | RDR2-sensitive |
| TTGCCGCTGTACGACGACGCCGGA  | 0   | 10  | RDR2-sensitive |
| TTGCCGGATAAGCAGAACCAGGCT  | 0   | 293 | RDR2-sensitive |
| TTGCCTAAGGTTAGTCGTTCAAT   | 0   | 9   | RDR2-sensitive |
| TTGCCTGAACGCTTGGATGCCGGC  | 0   | 10  | RDR2-sensitive |
| TTGCCTGTATGAGCTTAGCATGGC  | 0   | 13  | RDR2-sensitive |
| TTGCGACGGCTTACAACAATACCC  | 0   | 25  | RDR2-sensitive |
| TTGCGACGGCTTACAACAATACTC  | 0   | 13  | RDR2-sensitive |
| TTGCGACTGAGAGCCTAGGCAGAT  | 0   | 15  | RDR2-sensitive |
| TTGCGATCCGACTACGACGAGCAA  | 3   | 34  | RDR2-sensitive |
| TTGCGCACGCGCGGACCGTCCGGC  | 0   | 9   | RDR2-sensitive |
| TTGCGCGAGACAGTGTAAGATGGA  | 0   | 23  | RDR2-sensitive |
| TTGCGCTTGTACTGTAGCAGCGGT  | 1   | 35  | RDR2-sensitive |
| TTGCGGATCTGGTCGAGATGTGCG  | 24  | 3   | RDR2-resistant |
| TTGCGGATTGCGCGAGACAGTGTA  | 0   | 9   | RDR2-sensitive |
| TTGCGGCTAGGGCTGACTTGGCAT  | 0   | 10  | RDR2-sensitive |
| TTGCGGTGCTCTCTGGAAGATCGG  | 0   | 10  | RDR2-sensitive |
| TTGCGTAGGGGCTGTAGGGGGGCAC | 0   | 11  | RDR2-sensitive |
| TTGCGTCGCGACCGAGAGAGAGGC  | 0   | 19  | RDR2-sensitive |
| TTGCGTGATCCAGACTGAGCCGGA  | 0   | 12  | RDR2-sensitive |
| TTGCTAAGACTAGCATGGGCTGGC  | 15  | 0   | RDR2-resistant |
| TTGCTAATTTGATCGGACCGGCAC  | 0   | 10  | RDR2-sensitive |
| TTGCTACAGTCGTCGACACCGTCC  | 14  | 0   | RDR2-resistant |
| TTGCTACGGATTGTGAGTCGGCAT  | 1   | 21  | RDR2-sensitive |
| TTGCTACGTAAGTGTTCGTCGAC   | 198 | 13  | RDR2-resistant |
| TTGCTCCTAAACTGTAGAAGGCT   | 93  | 11  | RDR2-resistant |
| TTGCTCCTAAGACTGTAGAAGGCT  | 59  | 11  | RDR2-resistant |
| TTGCTCCTAAGGCTGTAGAAGGCT  | 75  | 4   | RDR2-resistant |
| TTGCTCGGATGGGACTTGGTCCGGC | 0   | 12  | RDR2-sensitive |
| TTGCTCGGTAGGGAAGTGGTCCGGC | 0   | 9   | RDR2-sensitive |
| TTGCTCTGAAATCTGACAGATGCG  | 17  | 0   | RDR2-resistant |
| TTGCTGATAGGGCCGCAATTTGAG  | 14  | 0   | RDR2-resistant |

|                          |     |    |                |
|--------------------------|-----|----|----------------|
| TTGCTGATCTAACTTATTGGACGG | 0   | 35 | RDR2-sensitive |
| TTGCTGCAGCAGCTCCAAGGCATT | 112 | 14 | RDR2-resistant |
| TTGCTGCAGCAGCTCTAAGGCATT | 32  | 4  | RDR2-resistant |
| TTGCTGCAGTAGCTCCAAGGCATT | 36  | 2  | RDR2-resistant |
| TTGCTGCGGGCTGTATGGCGCGGA | 21  | 1  | RDR2-resistant |
| TTGCTGCGTGGACTGTCTATGCAT | 0   | 28 | RDR2-sensitive |
| TTGCTGCTCTCGGGACTTCGACGG | 0   | 9  | RDR2-sensitive |
| TTGCTGGACGGCCTAAAACCCTGC | 1   | 19 | RDR2-sensitive |
| TTGCTGTAGAAGTGTGCAGGCCGT | 0   | 16 | RDR2-sensitive |
| TTGCTGTCTCTGAGTCTAGGCGTT | 47  | 1  | RDR2-resistant |
| TTGCTGTGTTTACCTGAAATGGTT | 20  | 0  | RDR2-resistant |
| TTGCTGTTGCTGAATTTGATGAGC | 43  | 1  | RDR2-resistant |
| TTGCTTCTGGAGATTGCGGTTCTT | 15  | 0  | RDR2-resistant |
| TTGCTTTATACGGCTCTCATTAGT | 16  | 0  | RDR2-resistant |
| TTGCTTTGAAAGCACCGTCGGCAC | 55  | 3  | RDR2-resistant |
| TTGCTTTTATATCCTGTAGCAAGA | 80  | 2  | RDR2-resistant |
| TTGGAATTTCTGGGATACACTTAT | 29  | 0  | RDR2-resistant |
| TTGGAATTTGTCATCGTGGGCAC  | 0   | 13 | RDR2-sensitive |
| TTGGAATATGAACCGTTTGAGGT  | 16  | 0  | RDR2-resistant |
| TTGGAATAGCTCTAGCTCTAGGAA | 32  | 1  | RDR2-resistant |
| TTGGAATGTTGCTTTTGTGGTGTG | 16  | 0  | RDR2-resistant |
| TTGGAATTGAAATTTGAAGTTGGA | 24  | 0  | RDR2-resistant |
| TTGGACAGGAAACTAGGCACGGCG | 2   | 57 | RDR2-sensitive |
| TTGGACAGTATTCCGTGATGGTTC | 35  | 8  | RDR2-resistant |
| TTGGACATAGTGAATACATTTTAA | 0   | 10 | RDR2-sensitive |
| TTGGACATGTATAGGCGCGGATGA | 0   | 10 | RDR2-sensitive |
| TTGGACCATCTACAGCAGGACTGA | 0   | 18 | RDR2-sensitive |
| TTGGACCCTTTGCTCGGCGCCATA | 1   | 14 | RDR2-sensitive |
| TTGGACCCTTTGCTCGGCGTCATA | 0   | 9  | RDR2-sensitive |
| TTGGACCGATCCGGAGCACGACAC | 0   | 9  | RDR2-sensitive |
| TTGGACCTAGCCCACTAGATACGG | 0   | 9  | RDR2-sensitive |
| TTGGACCTCCGGCATAACTGGTCT | 15  | 0  | RDR2-resistant |
| TTGGACCTTGAGCATGATTGGCCT | 0   | 10 | RDR2-sensitive |
| TTGGACCTTGGGCCGGGCCGGCCG | 14  | 0  | RDR2-resistant |
| TTGGACGCTACATCTGGAGTTCGG | 0   | 21 | RDR2-sensitive |
| TTGGACGGAACACCGGGTGGCGGA | 0   | 12 | RDR2-sensitive |
| TTGGACGTGGTCCAGAGCGGCTGC | 0   | 14 | RDR2-sensitive |
| TTGGACTACTAGATATGTTGGCTA | 0   | 20 | RDR2-sensitive |
| TTGGACTGGTGGGAGGGCTATTGT | 0   | 74 | RDR2-sensitive |
| TTGGACTTGGACTGGGAGGAGGAG | 0   | 9  | RDR2-sensitive |
| TTGGACTTTCGGTATTATAACAGT | 0   | 28 | RDR2-sensitive |
| TTGGAGCTCAAGCGAACGGACTAA | 0   | 25 | RDR2-sensitive |
| TTGGAGCTTTACTGTTAGAGCAGG | 79  | 0  | RDR2-resistant |
| TTGGAGCTTTACTGTTGGAGCGGG | 195 | 32 | RDR2-resistant |
| TTGGAGGTTCTTACGAGATAGGCT | 14  | 0  | RDR2-resistant |
| TTGGAGTAGGACGGTGTACCGAC  | 0   | 10 | RDR2-sensitive |
| TTGGAGTGGAGCCTACGACGCCGT | 0   | 13 | RDR2-sensitive |
| TTGGATAGACAGGCGTAACTCCAC | 0   | 10 | RDR2-sensitive |
| TTGGATATGTGACGGTGGCTTCCT | 0   | 13 | RDR2-sensitive |

|                           |    |    |                |
|---------------------------|----|----|----------------|
| TTGGATATTTTCTGCGGAATCGTC  | 76 | 5  | RDR2-resistant |
| TTGGATCATCGCTGTAATCGTCAT  | 37 | 1  | RDR2-resistant |
| TTGGATCCAAACACGTAGAGGGCT  | 0  | 9  | RDR2-sensitive |
| TTGGATCCAGACGACATGACAATA  | 25 | 0  | RDR2-resistant |
| TTGGATCTGATCCGGTTTTGTCGT  | 54 | 1  | RDR2-resistant |
| TTGGATGACTTGAGGTTGATGGGT  | 20 | 1  | RDR2-resistant |
| TTGGATGATTGAGTATAAAAAGGCA | 37 | 1  | RDR2-resistant |
| TTGGATGGACCAGGTGGGATGGAA  | 0  | 10 | RDR2-sensitive |
| TTGGATGGCTCGGCCGTAGCGGCT  | 28 | 0  | RDR2-resistant |
| TTGGATTAGTTGGAGGGCGATCAA  | 15 | 0  | RDR2-resistant |
| TTGGATTGAAATCGGAATGCAGC   | 31 | 6  | RDR2-resistant |
| TTGGATTCTGACTTAGAGGCGTTC  | 22 | 0  | RDR2-resistant |
| TTGGATTGGTGGTATAGACGACAA  | 0  | 16 | RDR2-sensitive |
| TTGGATTGGTTCGGTAGACACGGT  | 0  | 14 | RDR2-sensitive |
| TTGGATTGTCGGGTGGATCGGCGT  | 0  | 9  | RDR2-sensitive |
| TTGGCAAAC TAGAAAATCATGGCT | 0  | 9  | RDR2-sensitive |
| TTGGACCAATCGTCCTCGTCGCA   | 14 | 0  | RDR2-resistant |
| TTGGCATTCTTCGTCGGCTACATT  | 44 | 0  | RDR2-resistant |
| TTGGCATTGCGGTCGGTTAATGGT  | 0  | 9  | RDR2-sensitive |
| TTGGCCCTGAAGACTGGACGGTCC  | 0  | 12 | RDR2-sensitive |
| TTGGCGCGGACGCACGACGTGCAT  | 4  | 38 | RDR2-sensitive |
| TTGGCGTGGACGGTCCGTGATCAG  | 0  | 9  | RDR2-sensitive |
| TTGGCGTTTTAAGTCGGACGGTCC  | 0  | 11 | RDR2-sensitive |
| TTGGCTATAGACGGCTGCTGACGT  | 1  | 20 | RDR2-sensitive |
| TTGGCTCACGGGGACGGGACCAGA  | 41 | 2  | RDR2-resistant |
| TTGGCTCGGACCTGGCACATAGGT  | 0  | 11 | RDR2-sensitive |
| TTGGCTCTCGGCAAAGACTGACGG  | 1  | 39 | RDR2-sensitive |
| TTGGCTCTGCTCGGATCGGCTCGT  | 0  | 9  | RDR2-sensitive |
| TTGGCTCTGGCTGATCTTGGTGT   | 16 | 0  | RDR2-resistant |
| TTGGCTGAAGGCAGAACCCAGGGGA | 1  | 12 | RDR2-sensitive |
| TTGGCTGACAGGACTGTCCGGTGT  | 0  | 15 | RDR2-sensitive |
| TTGGCTTGGGCAGTAGGAAGGTAT  | 0  | 15 | RDR2-sensitive |
| TTGGCTTGACTAGGGTTGTCTGT   | 0  | 20 | RDR2-sensitive |
| TTGGCTTGTCAGGTTAACGGTGAT  | 19 | 1  | RDR2-resistant |
| TTGGGAAGGGAGCTTCGAGGCGGC  | 15 | 0  | RDR2-resistant |
| TTGGGACGAAGGCAAAGACGCCAT  | 0  | 9  | RDR2-sensitive |
| TTGGGACGTTACTGAGTGGACGGT  | 0  | 10 | RDR2-sensitive |
| TTGGGACTGTTAATCTACCGGCCT  | 0  | 21 | RDR2-sensitive |
| TTGGGATCCTGGGGAGTAAGCGTT  | 35 | 0  | RDR2-resistant |
| TTGGGATCTCTGACGGGCTGGTGTC | 0  | 9  | RDR2-sensitive |
| TTGGGATTGTGCGTAGGAGCGGTG  | 48 | 0  | RDR2-resistant |
| TTGGGCAGCGACATACTCGGGTTC  | 17 | 0  | RDR2-resistant |
| TTGGGCAGTAGGAAGGACAGGTAT  | 0  | 9  | RDR2-sensitive |
| TTGGGCATGGGATGAGGATGACAT  | 61 | 0  | RDR2-resistant |
| TTGGGCCATTGTAGAGTGGACGGT  | 1  | 22 | RDR2-sensitive |
| TTGGGCCGTTGCAGAGTGGACAGT  | 0  | 20 | RDR2-sensitive |
| TTGGGCGAACCAGAAGATCTCCAG  | 3  | 31 | RDR2-sensitive |
| TTGGGCTGAAGCGTGGCACGACAT  | 0  | 15 | RDR2-sensitive |
| TTGGGCTGGACCGACTAAGCAGGT  | 0  | 10 | RDR2-sensitive |

|                          |     |    |                |
|--------------------------|-----|----|----------------|
| TTGGGCTTTTTACCGGTTAGGAGT | 29  | 0  | RDR2-resistant |
| TTGGGGCGAAGGCAAAGACGCCAC | 0   | 11 | RDR2-sensitive |
| TTGGGGCTTTACTGTTGGAGCGGA | 0   | 10 | RDR2-sensitive |
| TTGGGGTCTGTGAACCAGCAGGGA | 38  | 3  | RDR2-resistant |
| TTGGGTAAACTTTGAGTAGACTGC | 0   | 10 | RDR2-sensitive |
| TTGGGTGTTAGTAGCGTGAGACGT | 0   | 26 | RDR2-sensitive |
| TTGGGTTGTGCTTCATAGACTGGT | 0   | 9  | RDR2-sensitive |
| TTGGTAAGTTGGAACGGAGCGGCT | 0   | 21 | RDR2-sensitive |
| TTGGTAATCTGGAACGGAGCGGCT | 0   | 87 | RDR2-sensitive |
| TTGGTAATCTGGAACGGAGCGGTT | 1   | 45 | RDR2-sensitive |
| TTGGTACATGCGGGCATCTTCAGT | 26  | 0  | RDR2-resistant |
| TTGGTACCTTACTATTTGATACGT | 22  | 0  | RDR2-resistant |
| TTGGTACTGTTAATCTACCGGCCT | 0   | 12 | RDR2-sensitive |
| TTGGTAGAAGTGTGGAATGATAGC | 39  | 3  | RDR2-resistant |
| TTGGTAGATTGTCAACATAGGTAT | 127 | 2  | RDR2-resistant |
| TTGGTAGATTTTGATAGAGCTGAA | 51  | 14 | RDR2-resistant |
| TTGGTAGCCTGTCTGAACGGACGC | 0   | 13 | RDR2-sensitive |
| TTGGTAGTTGCCTGAACGACGACG | 3   | 16 | RDR2-sensitive |
| TTGGTATTGTAGAACGGAGCGGTT | 0   | 42 | RDR2-sensitive |
| TTGGTCGAACTTTGATGTTGCATA | 75  | 0  | RDR2-resistant |
| TTGGTCGACAGAACTGCGGCACAA | 0   | 11 | RDR2-sensitive |
| TTGGTCTGCGTTAGAAGTTTCCGG | 17  | 1  | RDR2-resistant |
| TTGGTCTGTAACAAATGGCTTGTG | 30  | 3  | RDR2-resistant |
| TTGGTCTGTATGTATGGTCACGGA | 19  | 0  | RDR2-resistant |
| TTGGTCTGTTGTAGAGTGGGCGGT | 0   | 11 | RDR2-sensitive |
| TTGGTCTTAGCTCGATATCGGCAT | 34  | 2  | RDR2-resistant |
| TTGGTCTTGCGGATCTGGTCGAGA | 22  | 0  | RDR2-resistant |
| TTGGTGAGTCTGGAGAAGGTGGAC | 21  | 1  | RDR2-resistant |
| TTGGTGGACGTAAATGGACGGTTG | 0   | 9  | RDR2-sensitive |
| TTGGTGGAGGCCGGCGAGCTGGTG | 27  | 1  | RDR2-resistant |
| TTGGTGGGCTGGCACGAAGCACGC | 0   | 9  | RDR2-sensitive |
| TTGGTGGTTTGCCTAATGGGACGG | 14  | 0  | RDR2-resistant |
| TTGGTTATTTGAACATTGTGCAT  | 22  | 0  | RDR2-resistant |
| TTGGTTCCAGGTCTGTGTTGGCAC | 0   | 9  | RDR2-sensitive |
| TTGGTTGCAATGACAGGACGGGAC | 0   | 11 | RDR2-sensitive |
| TTGGTTGCAATGACAGGACGGGAT | 2   | 27 | RDR2-sensitive |
| TTGGTTGCAGAGTGAACGGAACAG | 0   | 9  | RDR2-sensitive |
| TTGGTTGCAGAGTGAACGGAACGG | 0   | 24 | RDR2-sensitive |
| TTGGTTGGCTGCAGAGCAGGAGGA | 0   | 30 | RDR2-sensitive |
| TTGGTTGTGGATCAAGTGAAGGCA | 25  | 0  | RDR2-resistant |
| TTGGTTGTGGGACAGCTAGGACGG | 0   | 33 | RDR2-sensitive |
| TTGGTTTACTACCTAAGACGTCGT | 0   | 12 | RDR2-sensitive |
| TTGGTTTACTAGGAATATGATCGT | 0   | 11 | RDR2-sensitive |
| TTGGTTTCTGAATAAATTTGGCCA | 214 | 0  | RDR2-resistant |
| TTGGTTTGAATCGCAGAATGATGT | 0   | 13 | RDR2-sensitive |
| TTGGTTTGAATCGCGGAACGATGT | 0   | 17 | RDR2-sensitive |
| TTGGTTTGACTTCGAGATTGCCGT | 19  | 0  | RDR2-resistant |
| TTGTAATTGGACTTTCGGTATTAT | 0   | 14 | RDR2-sensitive |
| TTGTACAAGTTATGAACAAGACGT | 0   | 11 | RDR2-sensitive |

|                            |     |     |                |
|----------------------------|-----|-----|----------------|
| TTGTACGCAAGGGAGCTTCGGCAT   | 0   | 13  | RDR2-sensitive |
| TTGTACGCGAGGAACGATGGCTGC   | 0   | 26  | RDR2-sensitive |
| TTGTACGGGGCCACTTTGACGGTA   | 21  | 1   | RDR2-resistant |
| TTGTAGAACTTCCTAGCTCGGCGT   | 1   | 12  | RDR2-sensitive |
| TTGTAGACATAATCGAGTGGCTCC   | 0   | 12  | RDR2-sensitive |
| TTGTAGAGTTCTTCGATGTGCGTG   | 17  | 0   | RDR2-resistant |
| TTGTAGATAGATGGATCAGTTGTT   | 427 | 67  | RDR2-resistant |
| TTGTAGATCTTCCATGGCCACAA    | 19  | 0   | RDR2-resistant |
| TTGTAGCACTGGACATAGCCGGAT   | 0   | 9   | RDR2-sensitive |
| TTGTAGCCTGGACAACGTGAGCGG   | 0   | 11  | RDR2-sensitive |
| TTGTAGCGCTCCACGGATCGGCCT   | 0   | 20  | RDR2-sensitive |
| TTGTATACTTTAGAGGCTAATTCA   | 14  | 0   | RDR2-resistant |
| TTGTATCACCATCAGTTGTTCCGGA  | 16  | 0   | RDR2-resistant |
| TTGTATTTGATGAGACTAATGGCT   | 34  | 1   | RDR2-resistant |
| TTGTCACGATTGGACTTCCGGCCG   | 0   | 9   | RDR2-sensitive |
| TTGTCAGGTCTCCTACGGCTCCAG   | 0   | 10  | RDR2-sensitive |
| TTGTCATCAAGCAGACTGTTGCGC   | 0   | 11  | RDR2-sensitive |
| TTGTCCTTTGGCCGGATCGTCGC    | 0   | 13  | RDR2-sensitive |
| TTGTCCTCTGTGCATACAATTGCA   | 40  | 1   | RDR2-resistant |
| TTGTCGAATCAGGAATCACGGTAT   | 0   | 16  | RDR2-sensitive |
| TTGTCGAGCGTTAGTCCAACGGGC   | 0   | 11  | RDR2-sensitive |
| TTGTCGATCTGAATCTGATGGCCT   | 1   | 40  | RDR2-sensitive |
| TTGTCGCGGGCGGATATTTACCAT   | 1   | 14  | RDR2-sensitive |
| TTGTCGCGTAGGACAGTTCGGCTA   | 0   | 18  | RDR2-sensitive |
| TTGTCGCGTAGGACAGTTCGGCTT   | 0   | 21  | RDR2-sensitive |
| TTGTCGCTGTAGGCACATGGCTAT   | 0   | 9   | RDR2-sensitive |
| TTGTCGGAECTCCGTATGGTGCAC   | 0   | 11  | RDR2-sensitive |
| TTGTCGTCGTTTCGTGCATCCCCAA  | 0   | 9   | RDR2-sensitive |
| TTGTCGTGCTGTTTATCGGTTGGG   | 38  | 1   | RDR2-resistant |
| TTGTCGTTTCATCGTCGTTTCGTCGT | 0   | 11  | RDR2-sensitive |
| TTGTCTAATTATAAGTTCGTCCGT   | 0   | 12  | RDR2-sensitive |
| TTGTCTCGTTTGGACTTCCGGCCG   | 0   | 13  | RDR2-sensitive |
| TTGTCTCGTTTGGACTTTCGGCCG   | 0   | 16  | RDR2-sensitive |
| TTGTCTGAATTACTTGCTGAAGAG   | 23  | 0   | RDR2-resistant |
| TTGTCTGACGATGATTTTCATGGCT  | 34  | 0   | RDR2-resistant |
| TTGTCTGTAATAAGTGAACGGCAG   | 0   | 18  | RDR2-sensitive |
| TTGTCTGTCTTGTAGAAGGGGTAT   | 1   | 318 | RDR2-sensitive |
| TTGTCTTACAACGTCCGGACATAA   | 0   | 10  | RDR2-sensitive |
| TTGTCTTGTTGGCTGTACGCAT     | 0   | 12  | RDR2-sensitive |
| TTGTGACCAACTCTTGATCGTA     | 37  | 1   | RDR2-resistant |
| TTGTGACTATGAGAGTGAAGATGT   | 0   | 14  | RDR2-sensitive |
| TTGTGACTGAGCCGGCCTAGACAG   | 0   | 16  | RDR2-sensitive |
| TTGTGAGCCTTTGACTTGAACGGA   | 11  | 53  | RDR2-sensitive |
| TTGTGAGTGTACATATGACTGGTT   | 76  | 5   | RDR2-resistant |
| TTGTGAGTTGGTATGTTTTATGGT   | 19  | 1   | RDR2-resistant |
| TTGTGCACTGTGAACGCCTACGGT   | 0   | 9   | RDR2-sensitive |
| TTGTGCCGCTGTAGATTAGACGGT   | 0   | 21  | RDR2-sensitive |
| TTGTGCCGATTGGTGGGTCGGAA    | 1   | 15  | RDR2-sensitive |
| TTGTGCTCTGAATCTGATGACTGT   | 0   | 10  | RDR2-sensitive |



|                            |     |    |                |
|----------------------------|-----|----|----------------|
| TTGTGCTGATTGGATGACTTGAGA   | 39  | 0  | RDR2-resistant |
| TTGTGCTGTAAGATATGATTGGTG   | 186 | 8  | RDR2-resistant |
| TTGTGGAAACTCCGTGGAGCGCGG   | 0   | 9  | RDR2-sensitive |
| TTGTGGAGTGCAGAGGTGGGAGC    | 22  | 0  | RDR2-resistant |
| TTGTGGATGATTGATACGTTGAT    | 1   | 12 | RDR2-sensitive |
| TTGTGGATGCCGGTCTCTAGCCAG   | 14  | 0  | RDR2-resistant |
| TTGTGGATGCGGAAGTTTGGCTAC   | 0   | 10 | RDR2-sensitive |
| TTGTGGATGCGGGAGTTTGGCTAC   | 0   | 12 | RDR2-sensitive |
| TTGTGGATTACTAAGCGAGACATG   | 19  | 1  | RDR2-resistant |
| TTGTGGGAAAAGAAACGACGCAT    | 0   | 15 | RDR2-sensitive |
| TTGTGGCAGTGAAGATGGAGATA    | 17  | 0  | RDR2-resistant |
| TTGTGGTCCGATGGCATACTGGC    | 0   | 43 | RDR2-sensitive |
| TTGTGGTATTGTAACTGCGGTAT    | 0   | 34 | RDR2-sensitive |
| TTGTGGTATTGTGAAGTTCGCGGTAT | 0   | 9  | RDR2-sensitive |
| TTGTGTAGCTCTTTAGAAGTTGGA   | 27  | 1  | RDR2-resistant |
| TTGTGTATTGAATCATGAAGACGT   | 14  | 0  | RDR2-resistant |
| TTGTGTCGGATTGGTGGGTCGGAA   | 0   | 30 | RDR2-sensitive |
| TTGTGTCGTAGTCAAGTCTTGGAC   | 18  | 1  | RDR2-resistant |
| TTGTGTCGTCATGGACTTGTCCGC   | 0   | 9  | RDR2-sensitive |
| TTGTGTCGTTGTAGTTAAAAGCAA   | 21  | 1  | RDR2-resistant |
| TTGTGTGACTGCCTTCAGAGATAA   | 0   | 10 | RDR2-sensitive |
| TTGTGTGATTTGAAGGCATGATAT   | 0   | 22 | RDR2-sensitive |
| TTGTGTGGAGGAGGTGCTGGTTGT   | 31  | 2  | RDR2-resistant |
| TTGTGTGGCATTGATCTTCGACC    | 19  | 0  | RDR2-resistant |
| TTGTGTTCTGTATGCGTTGGCATA   | 115 | 0  | RDR2-resistant |
| TTGTGTTGCGGCCTCACTTGCAGT   | 22  | 0  | RDR2-resistant |
| TTGTGTTTGTAGAGACTAACGGCT   | 20  | 2  | RDR2-resistant |
| TTGTTACTCTTGGTGATCGGCATC   | 25  | 0  | RDR2-resistant |
| TTGTTATGAGATGGAGGACGACAT   | 2   | 17 | RDR2-sensitive |
| TTGTTCAAAGTGTTCAGATTGGCA   | 17  | 1  | RDR2-resistant |
| TTGTTCAAGTGTGAATCCGTGCAT   | 0   | 18 | RDR2-sensitive |
| TTGTTCAAGTGTGAATCCGTGCAT   | 25  | 0  | RDR2-resistant |
| TTGTTCCACGGCGAAGACTGCGCG   | 22  | 2  | RDR2-resistant |
| TTGTTCTCTGTATGCAGATGCTGC   | 0   | 10 | RDR2-sensitive |
| TTGTTCTGCTTTGATCTGGATCGT   | 0   | 11 | RDR2-sensitive |
| TTGTTCTGGAATGATAGATGGCTG   | 50  | 7  | RDR2-resistant |
| TTGTTCTTTAGGTTCTGTGCTGGGC  | 28  | 0  | RDR2-resistant |
| TTGTTGAAGAATGTTGTGATGTAT   | 14  | 0  | RDR2-resistant |
| TTGTTGAGCTCTTCTGCATGGCC    | 15  | 0  | RDR2-resistant |
| TTGTTGGACTCTCGCAAGACGT     | 0   | 33 | RDR2-sensitive |
| TTGTTGGGCTCTCCGCATGAGATG   | 24  | 0  | RDR2-resistant |
| TTGTTGGGGCGAAGGCGAAGACGC   | 0   | 12 | RDR2-sensitive |
| TTGTTGGTTCTTTGGCATTGGAA    | 195 | 0  | RDR2-resistant |
| TTGTTGTCTGCTGTGGCTACGGTG   | 193 | 17 | RDR2-resistant |
| TTGTTGTTAGGACAGGGCACCCT    | 116 | 4  | RDR2-resistant |
| TTGTTGTTCTCTGTATGCAGATGC   | 0   | 19 | RDR2-sensitive |
| TTGTTTAATGTAAGAACTAGGCGA   | 37  | 0  | RDR2-resistant |
| TTGTTTCGGAAATGCATAGTGGTC   | 14  | 0  | RDR2-resistant |
| TTGTTTCTTCTACTTCTAGGCATG   | 15  | 0  | RDR2-resistant |

|                            |     |    |                |
|----------------------------|-----|----|----------------|
| TTGTTTGAACCTCTACGTGCGGCAT  | 0   | 16 | RDR2-sensitive |
| TTGTTTGAAGCAGTGGACAGTCTC   | 16  | 0  | RDR2-resistant |
| TTGTTTGCAGATGGACGGACCTGG   | 0   | 19 | RDR2-sensitive |
| TTGTTTGCAGATGGATGGACCTGG   | 0   | 12 | RDR2-sensitive |
| TTGTTTGCTCGGTACTTCGGTTAT   | 109 | 0  | RDR2-resistant |
| TTGTTTGGATTAATCTGTACCGGT   | 0   | 9  | RDR2-sensitive |
| TTGTTTGGCCTGAGACGCGGCAC    | 0   | 11 | RDR2-sensitive |
| TTGTTTGGTATCTTAGGCACAATC   | 20  | 0  | RDR2-resistant |
| TTGTTTGGTCTGTAACAAATGGCT   | 215 | 17 | RDR2-resistant |
| TTGTTTGGTTGCAGAGTGAACGGA   | 3   | 43 | RDR2-sensitive |
| TTGTTTGTGGAATTCGTCGCCGGC   | 45  | 0  | RDR2-resistant |
| TTGTTTTAACATGGTTGTTCCGGAT  | 22  | 1  | RDR2-resistant |
| TTGTTTTACTATGCTTGGTGTCTAT  | 14  | 0  | RDR2-resistant |
| TTGTTTTGCACTGTAGTAGACTGC   | 0   | 14 | RDR2-sensitive |
| TTGTTTTTGTGTTGATTTGTTGGTC  | 46  | 0  | RDR2-resistant |
| TTTAAAACGGATTCGGGATCGGAT   | 2   | 14 | RDR2-sensitive |
| TTTAAATTCGGGCTAGCACGGCAC   | 0   | 14 | RDR2-sensitive |
| TTTAAACATGGCTGTTCCGGATGATC | 35  | 0  | RDR2-resistant |
| TTTAAACATGGTTGTTCCGGATGATC | 119 | 3  | RDR2-resistant |
| TTTAACTTATATATTTCTCGGTCT   | 25  | 0  | RDR2-resistant |
| TTTAAAGACTGCATTAATGACAAAT  | 14  | 0  | RDR2-resistant |
| TTTAAAGATTGTAGCGTTAGTACGG  | 0   | 17 | RDR2-sensitive |
| TTTAAAGTGGGATATGGTGTATGGAT | 28  | 0  | RDR2-resistant |
| TTTAAAGTTTCTGTTAGGGTCCGGC  | 96  | 1  | RDR2-resistant |
| TTTAAATACATTGTGGATCTAGGAT  | 49  | 0  | RDR2-resistant |
| TTTAAACTCTGACATGTATGGTT    | 26  | 1  | RDR2-resistant |
| TTTAAATCGGGCCAAGGCACAACAG  | 0   | 16 | RDR2-sensitive |
| TTTAAATCTGTATTCGAGAAGACTT  | 14  | 0  | RDR2-resistant |
| TTTAAATGCAAAGGTGGCCTGACAC  | 1   | 13 | RDR2-sensitive |
| TTTAAATCCCAACCGTATCGTCGT   | 0   | 32 | RDR2-sensitive |
| TTTAAATTGGAGCTCAAGCGAACGG  | 0   | 11 | RDR2-sensitive |
| TTTAAATTTTCTAAGTGACGTGGAC  | 17  | 0  | RDR2-resistant |
| TTTAAATTTTTATTGAGCTTCGTCT  | 15  | 0  | RDR2-resistant |
| TTTACAAATGTAGATGTGTCTGTCT  | 17  | 1  | RDR2-resistant |
| TTTACAAGGACGTGCTTTTCTAAT   | 47  | 0  | RDR2-resistant |
| TTTACACAGTAGGATTGTCGGCAC   | 0   | 26 | RDR2-sensitive |
| TTTACACTTCGGGCTGGCACGGCA   | 0   | 28 | RDR2-sensitive |
| TTTACAGTCACGGTCATGAGCGGC   | 22  | 0  | RDR2-resistant |
| TTTACCGTCTTATCTGTTGGAGGC   | 1   | 25 | RDR2-sensitive |
| TTTACGTAAGTATAGGATCGCGCA   | 23  | 0  | RDR2-resistant |
| TTTACTGAACGCCAACGAGAGGCT   | 0   | 10 | RDR2-sensitive |
| TTTACTGTTAGAGCAGGGTGTTTT   | 30  | 0  | RDR2-resistant |
| TTTACTTGCTGAAGAGACTCGTCT   | 19  | 0  | RDR2-resistant |
| TTTAGAACTTTAGATTTAGACTGC   | 21  | 0  | RDR2-resistant |
| TTTAGAATTGTTGCTCTCTACGGT   | 21  | 1  | RDR2-resistant |
| TTTAGACGTGTCGTACTTTCCACC   | 23  | 0  | RDR2-resistant |
| TTTAGAGAAGACTGTAAAGGACGG   | 0   | 11 | RDR2-sensitive |
| TTTAGAGGAAGGAGAAGTCGTAAC   | 56  | 1  | RDR2-resistant |
| TTTAGAGGACCGTTTAGAGGACGT   | 8   | 28 | RDR2-sensitive |

|                           |     |    |                |
|---------------------------|-----|----|----------------|
| TTTAGAGGACCTTGTTGGAGGCGT  | 0   | 11 | RDR2-sensitive |
| TTTAGAGGACGCTCCTGAAGACGT  | 0   | 22 | RDR2-sensitive |
| TTTAGCAAGTCGGCAATACCACCC  | 83  | 5  | RDR2-resistant |
| TTTAGCACCTATGTGAAGGACTAA  | 0   | 11 | RDR2-sensitive |
| TTTAGGACATAATGGTCTTCGGAC  | 74  | 5  | RDR2-resistant |
| TTTAGGACTACCGAGATTCGGCAC  | 0   | 10 | RDR2-sensitive |
| TTTAGGGCTAGTTTGGATCGGCGC  | 0   | 15 | RDR2-sensitive |
| TTTAGGGGGAACCGCTGAAGACAG  | 1   | 13 | RDR2-sensitive |
| TTTAGGGGTGTAGTGACCGTGCTG  | 38  | 9  | RDR2-resistant |
| TTTAGGTGTTGTTGAATGGTCATG  | 16  | 0  | RDR2-resistant |
| TTTAGTAAAGAGTGTAGGATCGGC  | 45  | 5  | RDR2-resistant |
| TTTAGTACAAGCATCTCGTAGAAT  | 14  | 0  | RDR2-resistant |
| TTTAGTATGGTATCTGATTACGGT  | 0   | 17 | RDR2-sensitive |
| TTTAGTGAAGAGTGTAGGATCGGC  | 18  | 0  | RDR2-resistant |
| TTTAGTGAATAAAGTAGGATCGGC  | 29  | 2  | RDR2-resistant |
| TTTAGTGACGCATATGACTCATGT  | 16  | 0  | RDR2-resistant |
| TTTAGTGTGGTATCTGATTACGGT  | 0   | 32 | RDR2-sensitive |
| TTTAGTTGACGGTTTTGATGACAT  | 19  | 0  | RDR2-resistant |
| TTTATACTTCGGGCTGGCACGGCA  | 0   | 9  | RDR2-sensitive |
| TTTATACTTTTATGCTCGTAGGAT  | 28  | 4  | RDR2-resistant |
| TTTATAGACTGGGAGGGATGTGAG  | 25  | 0  | RDR2-resistant |
| TTTATAGGGCGACGTAGAGGCTAA  | 0   | 10 | RDR2-sensitive |
| TTTATATAGAGTTTCGTTGATTGT  | 16  | 0  | RDR2-resistant |
| TTTATATTTGTAGGGATAGGATGG  | 23  | 1  | RDR2-resistant |
| TTTATCAATACAATAGTAGTCGTC  | 23  | 2  | RDR2-resistant |
| TTTATCATTTAGGTCGGTTCATC   | 14  | 0  | RDR2-resistant |
| TTTATCGGACATTCGGTAAAACAT  | 0   | 9  | RDR2-sensitive |
| TTTATCGGCGTACTGTTGTGGTAC  | 1   | 12 | RDR2-sensitive |
| TTTATCGGGCACTCGGCAAAGCAG  | 3   | 23 | RDR2-sensitive |
| TTTATCTGTATCTCTCGAAGTAGA  | 39  | 1  | RDR2-resistant |
| TTTATGATTGTAAAATATTGGGAT  | 30  | 0  | RDR2-resistant |
| TTTATGCCTGCAGACGATGAAGAT  | 34  | 2  | RDR2-resistant |
| TTTATGGATCGGGAGTTATGGACC  | 22  | 0  | RDR2-resistant |
| TTTATGGTTTCGATTGGAATCTATT | 33  | 0  | RDR2-resistant |
| TTTATGTCCGATCATACTTGTAC   | 0   | 11 | RDR2-sensitive |
| TTTATGTGTAGTTCGGTATATAAT  | 18  | 0  | RDR2-resistant |
| TTTATTAGCAGATAGAACATTTTT  | 50  | 1  | RDR2-resistant |
| TTTATTAGTCGCTGGATAGTGCAA  | 3   | 27 | RDR2-sensitive |
| TTTATTCATGGATCTGGTTCGGAC  | 117 | 2  | RDR2-resistant |
| TTTATTCGCGGGCTAGCACGGCAC  | 0   | 34 | RDR2-sensitive |
| TTTATTCGGTACTTTGTGTATAAC  | 20  | 2  | RDR2-resistant |
| TTTATTGCAGAGACTCATGTATAT  | 0   | 12 | RDR2-sensitive |
| TTTATTCGGGCACTCGGCAAAGA   | 0   | 13 | RDR2-sensitive |
| TTTATTTGCTCTGTGTCTGGGA    | 75  | 1  | RDR2-resistant |
| TTTCAAATTTGGGATTATTCGGAT  | 72  | 2  | RDR2-resistant |
| TTTCAACGGTCGCTCCTGCGTCATA | 59  | 0  | RDR2-resistant |
| TTTCAACTGCTGAATCATGGACGG  | 0   | 9  | RDR2-sensitive |
| TTTCACTGATATGCTTTAATGGAT  | 100 | 2  | RDR2-resistant |
| TTTCAGAACTGCATTTAGAACAC   | 23  | 3  | RDR2-resistant |

|                           |     |    |                |
|---------------------------|-----|----|----------------|
| TTTCAGGATGTAGTTTTGCCGGAT  | 58  | 1  | RDR2-resistant |
| TTTCATCTCGTCATTAGAAAGTGCC | 15  | 0  | RDR2-resistant |
| TTTCATTATGGTTTTGTCGACATT  | 16  | 0  | RDR2-resistant |
| TTTCATTCTATTATAACAGTCGTC  | 39  | 0  | RDR2-resistant |
| TTTCCAAGTGGATTATGTGAACAG  | 0   | 11 | RDR2-sensitive |
| TTTCCACGGCTGTGAGGAGATGGC  | 0   | 13 | RDR2-sensitive |
| TTTCCAGCATTGATCGGATCGACA  | 16  | 0  | RDR2-resistant |
| TTTCCCACAGGATGTAGACGGAAA  | 0   | 10 | RDR2-sensitive |
| TTTCCGACGGCCTACACTGTTTTCC | 0   | 16 | RDR2-sensitive |
| TTTCCGTCAACAGTAGAGGCGCAA  | 0   | 12 | RDR2-sensitive |
| TTTCTCCCGTCAGCAGTAGAGGC   | 0   | 16 | RDR2-sensitive |
| TTTCGATCTGACTACGACGAGCAA  | 0   | 24 | RDR2-sensitive |
| TTTCGATTATGAGATTTGGCAGAT  | 14  | 0  | RDR2-resistant |
| TTTCGGAATGGGTGACGTGCGGCA  | 0   | 14 | RDR2-sensitive |
| TTTCGGACACTCGGCAAAGACTTT  | 0   | 34 | RDR2-sensitive |
| TTTCGGATACTGTTTGGGAGGGCT  | 0   | 10 | RDR2-sensitive |
| TTTCGGATATAATGGTCTTCGGAC  | 0   | 13 | RDR2-sensitive |
| TTTCGGATGATTACAGATCGCATG  | 0   | 9  | RDR2-sensitive |
| TTTCGGCGGACCATTACGCGCAT   | 1   | 27 | RDR2-sensitive |
| TTTCGGCTCGATTACTGACGGTAA  | 0   | 91 | RDR2-sensitive |
| TTTCGGGTATTAATGTAGTCGGA   | 0   | 13 | RDR2-sensitive |
| TTTCGGTAAACTGTACATCGGCAA  | 0   | 13 | RDR2-sensitive |
| TTTCGGTAAGATTTGAGTGTCCAC  | 20  | 1  | RDR2-resistant |
| TTTCGGTAGAAAACAATTTCCGGTT | 14  | 0  | RDR2-resistant |
| TTTCGGTGAAGTGTATATCGGCAA  | 2   | 19 | RDR2-sensitive |
| TTTCGGTTCTCGGTTATTTCCGGTT | 24  | 0  | RDR2-resistant |
| TTTCGGTTTTGAAGTTGACAGCAT  | 1   | 12 | RDR2-sensitive |
| TTTCGTAAGTCTGAACGATGTGCGT | 0   | 10 | RDR2-sensitive |
| TTTCGTAGGCCCGGGCTATTTTCGT | 0   | 11 | RDR2-sensitive |
| TTTCGTGACTGTTTCGGGCAACAC  | 0   | 15 | RDR2-sensitive |
| TTTCGTGGGCCCGGGCTATTTTCGT | 0   | 15 | RDR2-sensitive |
| TTTCGTTGGAGCCATGCAGCACGC  | 0   | 13 | RDR2-sensitive |
| TTTCGTTGGATTAGATGTGGGGTT  | 33  | 0  | RDR2-resistant |
| TTTCTAAATAAATAGTCTGACACC  | 15  | 0  | RDR2-resistant |
| TTTCTAATACGATAAGTTCGACGG  | 0   | 10 | RDR2-sensitive |
| TTTCTAATACTGTAAGTTCGACGG  | 3   | 83 | RDR2-sensitive |
| TTTCTAATACTGTAAGTTTGACGG  | 0   | 23 | RDR2-sensitive |
| TTTCTAGCTCATATGGTCGGCATC  | 167 | 3  | RDR2-resistant |
| TTTCTCATACTGATTCTTGGGACA  | 40  | 3  | RDR2-resistant |
| TTTCTCGGGCACTCGGCAAAGAAA  | 2   | 14 | RDR2-sensitive |
| TTTCTCGGGCGCAGTAACGGCTGC  | 0   | 19 | RDR2-sensitive |
| TTTCTCGGTCGGATTTATCGGTAT  | 0   | 12 | RDR2-sensitive |
| TTTCTCTGATTTTGTGTTGACGGCT | 29  | 1  | RDR2-resistant |
| TTTCTGACTCGGGTTCACGGCCTC  | 14  | 0  | RDR2-resistant |
| TTTCTGATCTTGATGTGGATGGC   | 117 | 0  | RDR2-resistant |
| TTTCTGATGACGTCATATTAGACA  | 70  | 21 | RDR2-resistant |
| TTTCTGCATATATGATTTTCGGTT  | 36  | 0  | RDR2-resistant |
| TTTCTGCCGATTGGTGGGTCCGGA  | 0   | 14 | RDR2-sensitive |
| TTTCTGCGGAATCGTCGTTTGAAT  | 20  | 0  | RDR2-resistant |

|                           |     |    |                |
|---------------------------|-----|----|----------------|
| TTTCTGCTGGATTGGTGGGTCGGA  | 0   | 9  | RDR2-sensitive |
| TTTCTGGCACGACATATATCTGGT  | 2   | 16 | RDR2-sensitive |
| TTTCTGTACGGCATCGAGTTCGCC  | 18  | 0  | RDR2-resistant |
| TTTCTGTAGGAAACGGATGACGCC  | 0   | 14 | RDR2-sensitive |
| TTTCTGTCCGATTGGTGGGTCGGA  | 0   | 19 | RDR2-sensitive |
| TTTCTTGAGGAGCTCGGTCATAGG  | 14  | 0  | RDR2-resistant |
| TTTCTTGATCACATAATGGATATT  | 27  | 2  | RDR2-resistant |
| TTTCTTTGATGGTCGTGGATCCCT  | 28  | 3  | RDR2-resistant |
| TTTCTTTTTGTTAGTCGCTGGATA  | 45  | 0  | RDR2-resistant |
| TTTGAAGCACCGTCGGCACGATC   | 88  | 5  | RDR2-resistant |
| TTTGAACAACGTAGCAGCTGCGA   | 0   | 11 | RDR2-sensitive |
| TTTGAACGGACACACCAGCGACAT  | 0   | 10 | RDR2-sensitive |
| TTTGAACTCTCAGCTTGGCGTCAT  | 0   | 10 | RDR2-sensitive |
| TTTGAACTGCAGGTCACTCGAAAC  | 25  | 2  | RDR2-resistant |
| TTTGAAGCTATGCGCGTTCGTCGT  | 0   | 9  | RDR2-sensitive |
| TTTGAATCGCGGAACGATGTCGTC  | 0   | 10 | RDR2-sensitive |
| TTTGAATCGCGGAATGATGTCGTC  | 0   | 11 | RDR2-sensitive |
| TTTGAATGATTGTATGTAGATGAC  | 0   | 25 | RDR2-sensitive |
| TTTGAATGATTGTATGTAGATGGC  | 80  | 1  | RDR2-resistant |
| TTTGAATTGAAGAACTTACATTAG  | 0   | 24 | RDR2-sensitive |
| TTTGAATTGAAGAACTTTAGGCAT  | 0   | 24 | RDR2-sensitive |
| TTTGAATTTAGTTGTAGATTTGCA  | 81  | 2  | RDR2-resistant |
| TTTGACCCGAATCTGTGCGTGCTC  | 41  | 1  | RDR2-resistant |
| TTTGACCCTAGTAGATCAACCACA  | 27  | 4  | RDR2-resistant |
| TTTGACCGGATACAAGATTGTGAT  | 0   | 12 | RDR2-sensitive |
| TTTGACGAGCTGGAACGAATCCAT  | 0   | 34 | RDR2-sensitive |
| TTTGACTACTAGATATGTTGGCTA  | 34  | 0  | RDR2-resistant |
| TTTGACTGACTGTGGCGTGGCTAG  | 0   | 25 | RDR2-sensitive |
| TTTGAGAAGCAGCTGAACTGATAA  | 0   | 11 | RDR2-sensitive |
| TTTGAGACACTTGAGATTGTGCTT  | 15  | 0  | RDR2-resistant |
| TTTGAGATTTGATGGATATTGACT  | 30  | 0  | RDR2-resistant |
| TTTGAGCACTGTGTGATGATGTCC  | 15  | 38 | RDR2-sensitive |
| TTTGAGCATCGTTGGACAATGGTT  | 125 | 10 | RDR2-resistant |
| TTTGAGCGGTAGAATATTTGGTTT  | 33  | 2  | RDR2-resistant |
| TTTGAGGACCTTCGAGGACGAAG   | 1   | 22 | RDR2-sensitive |
| TTTGAGTTGGTGGAGATGCTTGCA  | 14  | 0  | RDR2-resistant |
| TTTGATAAACTAAGAACTTCGGAG  | 31  | 4  | RDR2-resistant |
| TTTGATCGATGCGAGGCAGAGGGT  | 17  | 1  | RDR2-resistant |
| TTTGATCGGATATCGGATACTTGT  | 0   | 12 | RDR2-sensitive |
| TTTGATCTCGGCGTCATAGATCGT  | 0   | 11 | RDR2-sensitive |
| TTTGATGACTCTCCAGAACGACGC  | 0   | 9  | RDR2-sensitive |
| TTTGATGGTACGTGCTACTCGGAT  | 28  | 5  | RDR2-resistant |
| TTTGATGGTGCGGGGATGGGCGTT  | 27  | 0  | RDR2-resistant |
| TTTGATTAGTTTGTAAAGCTTCGGT | 28  | 2  | RDR2-resistant |
| TTTGATTTGATTGGTTATTCGGAT  | 61  | 3  | RDR2-resistant |
| TTTGCAAACGTAGCTGTATGGCC   | 0   | 27 | RDR2-sensitive |
| TTTGCAACCGGCATAATCTGAGTC  | 44  | 4  | RDR2-resistant |
| TTTGCAAGCTACTGAGATCTGGAT  | 30  | 0  | RDR2-resistant |
| TTTGCAATTTGTAGAAAGGATAGA  | 62  | 0  | RDR2-resistant |

|                            |     |     |                |
|----------------------------|-----|-----|----------------|
| TTTGACACAGAAGGACTACTTGCAC  | 0   | 15  | RDR2-sensitive |
| TTTGACACAGAAGGACTGCTTGCAT  | 1   | 19  | RDR2-sensitive |
| TTTGACAGACGACTTAAAACGCGAC  | 28  | 2   | RDR2-resistant |
| TTTGACAGACTCATTCAATTGGCTT  | 25  | 0   | RDR2-resistant |
| TTTGACAGTAAGTGTTTGAATCGTA  | 50  | 2   | RDR2-resistant |
| TTTGACATACAAATTCTACATGACA  | 18  | 0   | RDR2-resistant |
| TTTGACATAGTAGGACACTCGGCAT  | 1   | 49  | RDR2-sensitive |
| TTTGACCCAACGTTTCGTATCTGGAC | 59  | 7   | RDR2-resistant |
| TTTGACCGAGTGCCTTTTGTCCGGC  | 0   | 22  | RDR2-sensitive |
| TTTGACCTCCGGCGGACCAGCGGCT  | 1   | 17  | RDR2-sensitive |
| TTTGACGACTGAGAGCCTAGGCAGA  | 0   | 12  | RDR2-sensitive |
| TTTGACGAGCTGTCCGAGATGACAT  | 0   | 10  | RDR2-sensitive |
| TTTGACGCTGAACTCCGGAACGGAT  | 0   | 14  | RDR2-sensitive |
| TTTGACGGATGCAGGTCGTTGGCAC  | 0   | 17  | RDR2-sensitive |
| TTTGACTACGTACTGTTTTCGTCTGA | 196 | 12  | RDR2-resistant |
| TTTGACTACTAGTAGGACTGGGCAT  | 0   | 15  | RDR2-sensitive |
| TTTGACTCCTAAAAGTGTAGAAGGC  | 104 | 28  | RDR2-resistant |
| TTTGACTCCTAAGGCTGTAGAAGGC  | 29  | 2   | RDR2-resistant |
| TTTGACTCGGCAACACGGTCTTTAT  | 0   | 11  | RDR2-sensitive |
| TTTGACTCTGTGTGCTTGGGAGATC  | 31  | 0   | RDR2-resistant |
| TTTGACTGCAGACAACACTGATCTA  | 17  | 1   | RDR2-resistant |
| TTTGACTTCTGGAGATTGCGGTTCT  | 36  | 2   | RDR2-resistant |
| TTTGACTTGCAACTTGACATATATG  | 56  | 0   | RDR2-resistant |
| TTTGACTTTGAAAGCACCGTCCGGCA | 154 | 9   | RDR2-resistant |
| TTTGACTTTGGTTTGTGTTGGCATC  | 19  | 1   | RDR2-resistant |
| TTTGGAAGTATGAACCGGTTGAGG   | 33  | 6   | RDR2-resistant |
| TTTGGAAGTGTGTAGTGATGCGTC   | 108 | 10  | RDR2-resistant |
| TTTGACAGGAAACTAGGCACGGC    | 0   | 11  | RDR2-sensitive |
| TTTGACATATCCAACGAAGACCT    | 0   | 9   | RDR2-sensitive |
| TTTGACCAACTCGACGTTTACAGAA  | 0   | 11  | RDR2-sensitive |
| TTTGACCACTTACTCGGCGCCAT    | 0   | 11  | RDR2-sensitive |
| TTTGACCACTTGTCTCGGCGCCAT   | 1   | 14  | RDR2-sensitive |
| TTTGACCCAATGCTCGGCGCCAT    | 0   | 17  | RDR2-sensitive |
| TTTGACCCATTTCTCGGCGCCAT    | 0   | 15  | RDR2-sensitive |
| TTTGACCCGAAGCTCGACGCCAT    | 0   | 12  | RDR2-sensitive |
| TTTGACCCGAAGCTCGGCGCCAT    | 1   | 20  | RDR2-sensitive |
| TTTGACCCGATGCTCGACGTCAT    | 0   | 23  | RDR2-sensitive |
| TTTGACCCGATGCTCGGCGCCAT    | 0   | 11  | RDR2-sensitive |
| TTTGACCCGTAGTTCAGCGTCAT    | 0   | 28  | RDR2-sensitive |
| TTTGACCCCTCTGATCGGCGCCAT   | 1   | 16  | RDR2-sensitive |
| TTTGACCCCTCTGCTCGGCGCCAT   | 2   | 41  | RDR2-sensitive |
| TTTGACCCCTTAGCTCGACGCCAT   | 0   | 13  | RDR2-sensitive |
| TTTGACCCCTTAGCTCGGCGCCAC   | 0   | 25  | RDR2-sensitive |
| TTTGACCCCTTAGCTCGGCGCCAT   | 3   | 213 | RDR2-sensitive |
| TTTGACCCCTTAGCTCGGCGCCCT   | 0   | 14  | RDR2-sensitive |
| TTTGACCCCTTACTCGGCGCCAT    | 0   | 14  | RDR2-sensitive |
| TTTGACCCCTTACTCGGCGCCGT    | 3   | 19  | RDR2-sensitive |
| TTTGACCCCTTGTCTCGGCGCCAC   | 0   | 11  | RDR2-sensitive |
| TTTGACCCCTTGTCTCGGCGCCAT   | 12  | 267 | RDR2-sensitive |

|                          |     |    |                |
|--------------------------|-----|----|----------------|
| TTTGGACCCTTTGCTCGGCGCCCT | 0   | 17 | RDR2-sensitive |
| TTTGGACCCTTTGCTCGGCGCCGT | 0   | 9  | RDR2-sensitive |
| TTTGGACCCTTTGCTCGGCGTCAT | 1   | 24 | RDR2-sensitive |
| TTTGGACCGGCTTCTGCGGACGC  | 0   | 43 | RDR2-sensitive |
| TTTGGACCGGCTTGACGCTCAGAA | 0   | 11 | RDR2-sensitive |
| TTTGGACCGGGCTAAATTCGTGCC | 0   | 12 | RDR2-sensitive |
| TTTGGACCGGGCTGTTTTGGTCAT | 0   | 14 | RDR2-sensitive |
| TTTGGACCTAAAGATCGGCGCCAT | 0   | 9  | RDR2-sensitive |
| TTTGGACCTGATGCTCGGCGCCAT | 0   | 33 | RDR2-sensitive |
| TTTGGACCTTGTGGGAATAGCTC  | 233 | 7  | RDR2-resistant |
| TTTGGACCTTTTGCTCAGCGCCAT | 0   | 10 | RDR2-sensitive |
| TTTGGACCTTTTGCTCGGCGCCAT | 1   | 15 | RDR2-sensitive |
| TTTGGACGAGCGGTTTGCAGTTTT | 18  | 0  | RDR2-resistant |
| TTTGGACTCTTGCGTACCTTGGCA | 18  | 0  | RDR2-resistant |
| TTTGGAGACGCATCTGACAGACAA | 0   | 26 | RDR2-sensitive |
| TTTGGAGATGAATCTGTTGAGGGC | 15  | 0  | RDR2-resistant |
| TTTGGAGCTTTACTGTTAGAGCAG | 27  | 0  | RDR2-resistant |
| TTTGGAGCTTTACTGTTGGAGCGG | 358 | 63 | RDR2-resistant |
| TTTGGAGTAGGACGGTGTACCGA  | 2   | 23 | RDR2-sensitive |
| TTTGGAGTCATTAGAGCATATCGG | 333 | 11 | RDR2-resistant |
| TTTGGATACGTAGATGCAGCAGAT | 0   | 9  | RDR2-sensitive |
| TTTGGATACTCTCAGGACGGACGC | 0   | 12 | RDR2-sensitive |
| TTTGGATAGGAAATGGGCAAATGT | 17  | 0  | RDR2-resistant |
| TTTGGATCTGCAGAAGCACGCCGC | 0   | 13 | RDR2-sensitive |
| TTTGGATCTGCAGAAGCATGCCGC | 0   | 18 | RDR2-sensitive |
| TTTGGATGAAGAAGAAGGATGAGC | 17  | 1  | RDR2-resistant |
| TTTGGATGCTTGGATGGTCACTTG | 0   | 9  | RDR2-sensitive |
| TTTGGATGGAGACCGGTGGATAGA | 16  | 0  | RDR2-resistant |
| TTTGGATGGCTCGGCCGTAGCGGC | 39  | 0  | RDR2-resistant |
| TTTGGATGGTGTGAGCAGTTCGGA | 35  | 0  | RDR2-resistant |
| TTTGGATGTCTGGCTGTCACCGGC | 0   | 36 | RDR2-sensitive |
| TTTGGATTAGGACTCCTCAGGCGG | 0   | 9  | RDR2-sensitive |
| TTTGGATTCTGATGACCGATAAAC | 31  | 0  | RDR2-resistant |
| TTTGGATTTGTTGAGGCAGGATGT | 0   | 11 | RDR2-sensitive |
| TTTGGCACGACACAGATCTGGCAC | 0   | 28 | RDR2-sensitive |
| TTTGGCACGACCCAGATCTGGCAC | 0   | 14 | RDR2-sensitive |
| TTTGGCACGGCCCAGATCTGGCAT | 1   | 15 | RDR2-sensitive |
| TTTGGCACGGCCCATATCTGGCAC | 0   | 15 | RDR2-sensitive |
| TTTGGCACGGCCTATATCTGGCAC | 0   | 9  | RDR2-sensitive |
| TTTGGCACGGCTCATATCTGGCAC | 0   | 13 | RDR2-sensitive |
| TTTGGCACGGTACAGATCTGGCAT | 1   | 22 | RDR2-sensitive |
| TTTGGCCATCTATAGAAATGACGT | 0   | 13 | RDR2-sensitive |
| TTTGGCCTGACACGAACACGGCAT | 0   | 13 | RDR2-sensitive |
| TTTGGCGTTTCTGTAGATGGGCC  | 0   | 12 | RDR2-sensitive |
| TTTGGCTGGGGCGGCACATCTGTT | 37  | 4  | RDR2-resistant |
| TTTGGGCAGGTATGGTATGACTTC | 0   | 17 | RDR2-sensitive |
| TTTGGGCCAAAACACCAGTTGA   | 33  | 4  | RDR2-resistant |
| TTTGGGCCAGTACGAGCACGACAC | 0   | 22 | RDR2-sensitive |
| TTTGGGCCGGCTTCTGCGGACGC  | 0   | 22 | RDR2-sensitive |

|                            |     |    |                |
|----------------------------|-----|----|----------------|
| TTTGGGTAGAATTCGGGTACCCGG   | 0   | 9  | RDR2-sensitive |
| TTTGGGTCATGTCGGGTCCGCCAC   | 0   | 21 | RDR2-sensitive |
| TTTGGTAAGCAGAACTGGCGATGC   | 70  | 14 | RDR2-resistant |
| TTTGGTAATCTGGAACGGAACGGT   | 0   | 9  | RDR2-sensitive |
| TTTGGTATAGGAGTGGTTTTGACC   | 20  | 0  | RDR2-resistant |
| TTTGGTCCATGGGATTGCCGCATT   | 15  | 0  | RDR2-resistant |
| TTTGGTCCGGTCTGAATTCGGCAT   | 0   | 12 | RDR2-sensitive |
| TTTGGTCCGGTCCGGTCCGGCGATTT | 0   | 11 | RDR2-sensitive |
| TTTGGTGTAGGACGGTGTTATCGA   | 0   | 19 | RDR2-sensitive |
| TTTGGTTGCGTTGGCTCTTGCTG    | 30  | 0  | RDR2-resistant |
| TTTGGTTGCTGTGAGCCAGGCTAT   | 0   | 23 | RDR2-sensitive |
| TTTGGTTGCTGTGAGTCAGGCTAT   | 0   | 17 | RDR2-sensitive |
| TTTGTAACATGAACCGGTTGAGG    | 26  | 0  | RDR2-resistant |
| TTTGTACTGTAGATAATAGGCTGT   | 0   | 11 | RDR2-sensitive |
| TTTGTAGATAGATGGATCAGTTGT   | 107 | 29 | RDR2-resistant |
| TTTGTAGATCTTTCTATGGCCGCA   | 28  | 1  | RDR2-resistant |
| TTTGTAGGGATAGGATGGATAATT   | 26  | 1  | RDR2-resistant |
| TTTGTATCGGATACGAACTGCAGA   | 21  | 0  | RDR2-resistant |
| TTTGTATCGGATTGGTGGGTCCGGA  | 0   | 12 | RDR2-sensitive |
| TTTGTACAGCAGCTGGACGTGCCTT  | 19  | 0  | RDR2-resistant |
| TTTGTACAGCAGCTTTATGGATTGG  | 56  | 2  | RDR2-resistant |
| TTTGTCCCTGTAGTGTTGCATCTAG  | 0   | 9  | RDR2-sensitive |
| TTTGTCCGAGCGTACTGTCCGGCGT  | 0   | 10 | RDR2-sensitive |
| TTTGTCCGTTTCTTCGTGCGTCAT   | 0   | 11 | RDR2-sensitive |
| TTTGTCTCGTTTGGACTTCCGGCC   | 0   | 11 | RDR2-sensitive |
| TTTGTCTCGTTTGGACTTTCGGCC   | 0   | 13 | RDR2-sensitive |
| TTTGTCTCTGTCAGAGCAGCGGCT   | 0   | 10 | RDR2-sensitive |
| TTTGTCTCTGTCGGACCAGCGGCT   | 0   | 31 | RDR2-sensitive |
| TTTGTCTTGTAGTGTAGAGGACGA   | 0   | 16 | RDR2-sensitive |
| TTTGTGACTCTGTACCGAGCCGGC   | 0   | 11 | RDR2-sensitive |
| TTTGTGAGCCTTGACTTGAACGG    | 0   | 10 | RDR2-sensitive |
| TTTGTGCCGATTGGTGGGTCCGGA   | 0   | 17 | RDR2-sensitive |
| TTTGTGCCGAGGAAGGATGTCCAG   | 4   | 39 | RDR2-sensitive |
| TTTGTGGAATTCGTCGCCGGCACC   | 17  | 0  | RDR2-resistant |
| TTTGTGGAGTGCAGAGAGGTGGGAG  | 29  | 1  | RDR2-resistant |
| TTTGTGTCGATTGGTGGGTCCGGA   | 1   | 47 | RDR2-sensitive |
| TTTGTGTCGTACGAACTTGGCTGC   | 1   | 23 | RDR2-sensitive |
| TTTGTTACCGGTTAGAAGCTCATA   | 48  | 5  | RDR2-resistant |
| TTTGTTCAGAGTAGAATCAGCGTA   | 0   | 13 | RDR2-sensitive |
| TTTGTTCCTTAGGTTCTGTGCTGGG  | 14  | 0  | RDR2-resistant |
| TTTGTTGACGACTACTATTGTATT   | 34  | 2  | RDR2-resistant |
| TTTGTTGCGCGGGACTAACGACGG   | 0   | 17 | RDR2-sensitive |
| TTTGTGGAGACAAAAAGATGCAT    | 0   | 9  | RDR2-sensitive |
| TTTGTTTAATCTTAAGGATGGTGC   | 17  | 1  | RDR2-resistant |
| TTTGTTCATGGTAGTAGCTGAT     | 56  | 0  | RDR2-resistant |
| TTTGTTCGGCTTCTGGCGGCTTC    | 0   | 13 | RDR2-sensitive |
| TTTGTTTGAAGCAGTGGACAGTCT   | 20  | 0  | RDR2-resistant |
| TTTGTTTGATGGTACGTGCTACTC   | 75  | 9  | RDR2-resistant |
| TTTGTTCGCTCGGTACTTCGGTTA   | 28  | 0  | RDR2-resistant |



|                           |     |    |                |
|---------------------------|-----|----|----------------|
| TTTGTTTGGATACTCTCAGGACGG  | 0   | 9  | RDR2-sensitive |
| TTTGTTTGGTCTGTAACAAATGGC  | 189 | 14 | RDR2-resistant |
| TTTGTTTGGTTGCAGAGTGAACGG  | 11  | 90 | RDR2-sensitive |
| TTTGTTTGGTTTGTAGAATGGTAT  | 0   | 11 | RDR2-sensitive |
| TTTGTTTTAATTAACAGTCGGAT   | 77  | 2  | RDR2-resistant |
| TTTTAAAACTTATCCGGATGTCT   | 20  | 0  | RDR2-resistant |
| TTTTAAAGTAGAAATGGTTTCATG  | 24  | 0  | RDR2-resistant |
| TTTTAACTTATATATTTCTCGGTC  | 32  | 0  | RDR2-resistant |
| TTTTAAGACTGCATTAATGACAAA  | 22  | 2  | RDR2-resistant |
| TTTTACTTTCGGACTAGTACGGC   | 0   | 10 | RDR2-sensitive |
| TTTTACTTTCGGACTGATACGGC   | 0   | 10 | RDR2-sensitive |
| TTTTACTTTCGGACTGGCACGGC   | 0   | 13 | RDR2-sensitive |
| TTTTACTTTCGGGCTAGCACGGC   | 0   | 11 | RDR2-sensitive |
| TTTTACTTTCGGGCTGGCACGGC   | 2   | 52 | RDR2-sensitive |
| TTTTACTTTCGGGCTGGCACGGT   | 0   | 25 | RDR2-sensitive |
| TTTTACCCTACTGATGACCGCGCC  | 30  | 0  | RDR2-resistant |
| TTTTACTGAATTTGTTGGACGGAT  | 0   | 35 | RDR2-sensitive |
| TTTTACTTCTCTGATGACTCCGGC  | 32  | 1  | RDR2-resistant |
| TTTTAGACTGGACTAAGATAAAGC  | 24  | 0  | RDR2-resistant |
| TTTTAGAGGATGGTAAGTACTATT  | 17  | 1  | RDR2-resistant |
| TTTTAGATATGTTAGTGACGACGT  | 16  | 0  | RDR2-resistant |
| TTTTAGCAAGTCGGCAATACCACC  | 49  | 2  | RDR2-resistant |
| TTTTAGGAGTAGGACGGTGTTCGAC | 1   | 30 | RDR2-sensitive |
| TTTTAGGATCACAGGAGACTTCGT  | 0   | 14 | RDR2-sensitive |
| TTTTAGGCTGATACGGTACGACAC  | 0   | 18 | RDR2-sensitive |
| TTTTAGTATGGTATCTGATTACGG  | 1   | 14 | RDR2-sensitive |
| TTTTAGTGAATAAAGTAGGATCGG  | 15  | 0  | RDR2-resistant |
| TTTTAGTTGACGGTTTTGATGACA  | 19  | 0  | RDR2-resistant |
| TTTTATACTTCGGGCTGGCACGGC  | 0   | 11 | RDR2-sensitive |
| TTTTATAGCGATCGGTTAGGATAA  | 0   | 10 | RDR2-sensitive |
| TTTTATAGGAATTCGTAGCTCGGC  | 2   | 15 | RDR2-sensitive |
| TTTTATATACTGGAGACAATAAT   | 71  | 0  | RDR2-resistant |
| TTTTATATTTGTAGGGATAGGATG  | 39  | 0  | RDR2-resistant |
| TTTTATCGGGCACTCGGCAAAGAA  | 1   | 15 | RDR2-sensitive |
| TTTTATGATAGTCGGTGAATGGTA  | 69  | 0  | RDR2-resistant |
| TTTTATGTAGAAGATATTTAAAAT  | 34  | 1  | RDR2-resistant |
| TTTTATTAGTCGCTGGATAGTGCA  | 37  | 9  | RDR2-resistant |
| TTTTATTGGTTGTCAGCAAAAATC  | 61  | 1  | RDR2-resistant |
| TTTTATTTAGGCAGTAGCTAGGTT  | 23  | 0  | RDR2-resistant |
| TTTTATTTGCTCGTTTGTAATAA   | 0   | 10 | RDR2-sensitive |
| TTTTATTTGTCGCTGGATAGTGCA  | 58  | 11 | RDR2-resistant |
| TTTTATTTGTCGCTGGATAGTGTA  | 36  | 6  | RDR2-resistant |
| TTTTATTTTCGTCGGCCGGCCAC   | 0   | 13 | RDR2-sensitive |
| TTTTCAAATTTGGGATTATTCGGA  | 51  | 2  | RDR2-resistant |
| TTTTCACAGTGGATATATTTGGCT  | 19  | 0  | RDR2-resistant |
| TTTTCATACTGTAGTAAGGGGTAC  | 0   | 12 | RDR2-sensitive |
| TTTTCCATCCAACGGTCGTCCGAA  | 0   | 14 | RDR2-sensitive |
| TTTTCCGTTGACTGTTTCATATAAT | 40  | 9  | RDR2-resistant |
| TTTTCGACGGTCTCTGACGGCCAG  | 0   | 39 | RDR2-sensitive |

|                           |    |    |                |
|---------------------------|----|----|----------------|
| TTTTCGATCTACTTTACAACCGGC  | 23 | 2  | RDR2-resistant |
| TTTTCGATCTACTTTGCAACCGGC  | 25 | 1  | RDR2-resistant |
| TTTTCGCTTGATGATTGAGTATA   | 18 | 0  | RDR2-resistant |
| TTTTCGGAATGGGTGACGTGCGGC  | 2  | 17 | RDR2-sensitive |
| TTTTCGGACTCGGCAAAGACTT    | 3  | 32 | RDR2-sensitive |
| TTTTCGGACAGTACCATACCATAT  | 0  | 22 | RDR2-sensitive |
| TTTTCGGCGGCTTCTGACACGGCC  | 3  | 23 | RDR2-sensitive |
| TTTTCGGGCACTCGGCAAAGAAGC  | 0  | 13 | RDR2-sensitive |
| TTTTCGGTCTATTTGAGGTTCCGGT | 0  | 9  | RDR2-sensitive |
| TTTTCGTCCTGTGGAGAGGTTAGT  | 0  | 15 | RDR2-sensitive |
| TTTTCGTGTCTGACTGGACTGGC   | 0  | 12 | RDR2-sensitive |
| TTTTCGTTGGAGCAGCAGACGCGT  | 0  | 24 | RDR2-sensitive |
| TTTTCTCCCGTCAGCAGTAGAGGC  | 1  | 17 | RDR2-sensitive |
| TTTTCTCGGGCACTCGGCAAAGAA  | 1  | 13 | RDR2-sensitive |
| TTTTCTCGGGCACTCGGCAAAGAC  | 0  | 11 | RDR2-sensitive |
| TTTTCTCGGGCACTCGGCAAAGAG  | 0  | 10 | RDR2-sensitive |
| TTTTCTCGGTTCCATGGTCGTCAT  | 0  | 15 | RDR2-sensitive |
| TTTTCTGCGGAATCGTCGTTTGAA  | 41 | 0  | RDR2-resistant |
| TTTTCTGTAATGACGGTCTGTAAC  | 2  | 14 | RDR2-sensitive |
| TTTTCTGTTTTCTGGCGGCCGACT  | 14 | 0  | RDR2-resistant |
| TTTTCTTCGCGGATACGGATTTAG  | 0  | 15 | RDR2-sensitive |
| TTTTCTTGGGATTCTTTTGTCCGC  | 2  | 18 | RDR2-sensitive |
| TTTTCTTTATTTGCTCTGTGTCGT  | 16 | 0  | RDR2-resistant |
| TTTTCTTTCAAACGTCGTTGGTC   | 0  | 75 | RDR2-sensitive |
| TTTTCTTTTTATTTGTCGTTGGAC  | 20 | 0  | RDR2-resistant |
| TTTTGAAGGGATTGGAGAGGGTGT  | 0  | 9  | RDR2-sensitive |
| TTTTGAATGCATGATTAAGGGCTC  | 76 | 5  | RDR2-resistant |
| TTTTGAGAAGCAGCTGAACTGATA  | 0  | 12 | RDR2-sensitive |
| TTTTGAGATGGATACTAGTATGCT  | 41 | 0  | RDR2-resistant |
| TTTTGAGGACCTTCGGAAGACGAA  | 1  | 15 | RDR2-sensitive |
| TTTTGAGGACCTTCGGAGGACGAA  | 1  | 17 | RDR2-sensitive |
| TTTTGAGTAGTTCGTAGAGTGCAT  | 0  | 9  | RDR2-sensitive |
| TTTTGATAGTAACTGGGATGCGCT  | 15 | 0  | RDR2-resistant |
| TTTTGATTTGATTGGTTATTCGGA  | 28 | 0  | RDR2-resistant |
| TTTTGCATCGCGAGACACAGGCGC  | 0  | 14 | RDR2-sensitive |
| TTTTGCGCCTATCGGATCGGAGAA  | 1  | 17 | RDR2-sensitive |
| TTTTGCGGACTCCTCGATATCGGC  | 15 | 0  | RDR2-resistant |
| TTTTGCGGCATTCAAGTGAATCTT  | 16 | 0  | RDR2-resistant |
| TTTTGCTTCTGGAGATTGCGGTTT  | 84 | 3  | RDR2-resistant |
| TTTTGGAGGGATTGGAGAGGGTAT  | 0  | 9  | RDR2-sensitive |
| TTTTGGAGGGATTGGAGAGGGTGT  | 1  | 12 | RDR2-sensitive |
| TTTTGGGACTGGTCCGTTAGGCAT  | 0  | 12 | RDR2-sensitive |
| TTTTGGGCAGGTATGGTATGACTT  | 0  | 17 | RDR2-sensitive |
| TTTTGGTTTTAGAAATTTCCACGGT | 0  | 11 | RDR2-sensitive |
| TTTTGTA ACTATGAACCGGTTGAG | 17 | 0  | RDR2-resistant |
| TTTTGTA CTGTTGTTGAGAGACGT | 35 | 2  | RDR2-resistant |
| TTTTGTATTGTTGTTGAGAGACGT  | 68 | 7  | RDR2-resistant |
| TTTTGTCACTGTAAGGGGGAGCAT  | 21 | 2  | RDR2-resistant |
| TTTTGTCAGCAGCTGGACGTGCCT  | 14 | 0  | RDR2-resistant |

|                           |     |    |                |
|---------------------------|-----|----|----------------|
| TTTTGTCGGCTACGGTTTTGGAAA  | 23  | 0  | RDR2-resistant |
| TTTTGTCGGGCACTCGGCAAAGAA  | 3   | 75 | RDR2-sensitive |
| TTTTGTCGGGCACTCGGCAAAGAC  | 1   | 16 | RDR2-sensitive |
| TTTTGTCTAACTGTTGAAAGGATT  | 64  | 4  | RDR2-resistant |
| TTTTGTGGAGTGAGGTTAGATGAA  | 23  | 0  | RDR2-resistant |
| TTTTGTGTCGTGGGTATGGGTATG  | 0   | 13 | RDR2-sensitive |
| TTTTGTTAGGCTCACGAGTCGGCT  | 0   | 15 | RDR2-sensitive |
| TTTTGTTGGACTTCGGCTTCAAGT  | 15  | 0  | RDR2-resistant |
| TTTTGTTTAGTTTCATCGGATGCTA | 17  | 0  | RDR2-resistant |
| TTTTTAACTGAGTACTATACGGCC  | 46  | 0  | RDR2-resistant |
| TTTTTACACTTCGGGCTGGCACGG  | 0   | 34 | RDR2-sensitive |
| TTTTTACTGTATGTGTGACGCTAT  | 0   | 14 | RDR2-sensitive |
| TTTTTAGGAGTAGGACGGTGTCAA  | 8   | 24 | RDR2-sensitive |
| TTTTTAGTTGTCGCTGGATAGTTT  | 0   | 13 | RDR2-sensitive |
| TTTTTAGTTTGAATAGGTTCGGTAT | 24  | 0  | RDR2-resistant |
| TTTTTATAGCGGCGGGACGGAGAT  | 20  | 0  | RDR2-resistant |
| TTTTTATATTTGTAGGGATAGGAT  | 24  | 0  | RDR2-resistant |
| TTTTTATCGACTTGAAAAGGCCT   | 19  | 0  | RDR2-resistant |
| TTTTTATCGGGCACTCGGCAAAGA  | 0   | 11 | RDR2-sensitive |
| TTTTTATCGGGCACTCGGCAAAGC  | 0   | 19 | RDR2-sensitive |
| TTTTTATTTAGGCAGTAGATAGGT  | 71  | 9  | RDR2-resistant |
| TTTTTATTTGTCGCTGGATAGTGC  | 4   | 21 | RDR2-sensitive |
| TTTTTATTTGTCGCTGGATAGTGT  | 9   | 50 | RDR2-sensitive |
| TTTTTATTTGTCGTTGGATAGTGC  | 1   | 14 | RDR2-sensitive |
| TTTTTCAACTGTTATGCATCCATC  | 148 | 5  | RDR2-resistant |
| TTTTTCGAAGTGAGTCTGGGTAAC  | 45  | 0  | RDR2-resistant |
| TTTTTCGAGACGTCGAGACGGTAT  | 0   | 13 | RDR2-sensitive |
| TTTTTCGGACACTCGGCAAAGACT  | 2   | 17 | RDR2-sensitive |
| TTTTTCGTCGACCCTTAAAGGCAT  | 0   | 21 | RDR2-sensitive |
| TTTTTCGTGCTAAACGGGCCGGCC  | 0   | 9  | RDR2-sensitive |
| TTTTTCTACAAGTCTAAGACATT   | 16  | 0  | RDR2-resistant |
| TTTTTCTCGGGCACTCGGCAAAGA  | 1   | 13 | RDR2-sensitive |
| TTTTTCTTTCAAACGTCGTTGGT   | 0   | 18 | RDR2-sensitive |
| TTTTTGACGACGGCAGCCAACAGG  | 19  | 0  | RDR2-resistant |
| TTTTTGAGGACCTTCGGAAGACGA  | 0   | 19 | RDR2-sensitive |
| TTTTTGAGGACCTTCGAGGACGA   | 0   | 24 | RDR2-sensitive |
| TTTTTGAGGTGTGTATATGACAAT  | 15  | 0  | RDR2-resistant |
| TTTTTGATCCTTCGATGTCGGCTC  | 24  | 1  | RDR2-resistant |
| TTTTTGCAGGGCTACGAGACGCGG  | 14  | 0  | RDR2-resistant |
| TTTTTGCTTCTGGAGATTGCGGTT  | 18  | 0  | RDR2-resistant |
| TTTTTGGGATTGTAAATGTGGCAG  | 18  | 0  | RDR2-resistant |
| TTTTTGGTGGTCGTCTTGTTTCAG  | 28  | 3  | RDR2-resistant |
| TTTTTGTCGGCTACGGTTTTGGAA  | 43  | 3  | RDR2-resistant |
| TTTTTGTCTGGGCACTCGGCAAAGA | 1   | 12 | RDR2-sensitive |
| TTTTTGTGTCGTGGGTATGGGTAT  | 0   | 24 | RDR2-sensitive |
| TTTTTGTTCCGGCCGGAATCGGTAA | 0   | 11 | RDR2-sensitive |
| TTTTTGTTCCGGTCGGAATCGGTAA | 2   | 80 | RDR2-sensitive |
| TTTTTTAGACGTGTCGTACTTTCC  | 25  | 2  | RDR2-resistant |
| TTTTTTATATTTGTAGGGATAGGA  | 20  | 0  | RDR2-resistant |

|                          |    |    |                |
|--------------------------|----|----|----------------|
| TTTTTATCGTCACTCGGCAAAGC  | 0  | 11 | RDR2-sensitive |
| TTTTTATCGTCGTTGTCTTGCAT  | 0  | 15 | RDR2-sensitive |
| TTTTTTCGGACACTCGGCAAAGAC | 1  | 15 | RDR2-sensitive |
| TTTTTTGGTGGTCGTCTTGGTTC  | 22 | 0  | RDR2-resistant |
