# Supplementary material for: Loss of RNA–Dependent RNA Polymerase 2 (RDR2) Function Causes Widespread and Unexpected Changes in the Expression of Transposons, Genes, and 24-nt Small RNAs
Source: PubMed Central journal article supplement (PMC2774947; doi:10.1371/journal.pgen.1000737), 2009-11-20
Supplement: pgen.1000737.s013.pdf [file pgen.1000737.s013.pdf]

**Table S8.** Primer sequences used for qRT-PCR experiment

| <b>Gene<sup>a</sup></b> | <b>Sequence for forward primer</b> | <b>Sequence for reverse primer</b> |
|-------------------------|------------------------------------|------------------------------------|
| <i>hAT</i>              | AATGCTATGGAGGTGGACGA               | AGCAATCCATGCTTGTTGA                |
| <i>ago4a</i>            | GCCCACCCACTATCATGTTC               | TCTCGTCGGCATTAAACCT                |
| <i>ago4b</i>            | TCGAAGTTCCTTGGATGACA               | TCATTCCTGGAAAGCCAGAT               |
| <i>ago4c</i>            | CGCACCCAATCACCTAAAAT               | CCGTGGCTTAAACAATGAGTC              |
| <i>ddm1</i>             | GCCCCTGCAGAAGTAGCTTT               | TGGGTACCGTACGGAGAGTC               |
| <i>liguleless3</i>      | GATCTGGCATGTGGAGTGAC               | CAACCTCAGCTCAGCAGATT               |
| <i>met1</i>             | TGCACCATGAGAAGTTTTCC               | CTTAGCTTCATGGGTCATGG               |
| <i>MULE</i>             | AGTGCAAGTGTGGTGGTCAA               | CCATGTTGTGATGCTAAAACG              |

<sup>a</sup> Details are provided in the legend of Figure 2.
