# Supplementary material for: Loss of RNA–Dependent RNA Polymerase 2 (RDR2) Function Causes Widespread and Unexpected Changes in the Expression of Transposons, Genes, and 24-nt Small RNAs
Source: PLoS Genet. 2009 Nov 20;5(11):e1000737. doi: 10.1371/journal.pgen.1000737 (PMC2774947; doi:10.1371/journal.pgen.1000737)
Supplement: Table S5 — Alignment of RNA-seq reads to genome and genes. (0.01 MB PDF) [file pgen.1000737.s010.pdf]

**Table S5.** Alignment of RNA seq reads to genome and genes

| Genotype         | Total Reads <sup>a</sup> | No. Non-uniquely mapped <sup>b</sup> | No. Uniquely Mapped Reads |                       | Total genes <sup>e</sup> |
|------------------|--------------------------|--------------------------------------|---------------------------|-----------------------|--------------------------|
|                  |                          |                                      | To Genome <sup>c</sup>    | To Genes <sup>d</sup> |                          |
| <i>mop1/mop1</i> | 4,474,243                | 950,295 (21%)                        | 2,775,266 (62%)           | 2,156,241 (78%)       | 24,743 (76%)             |
| <i>Mop1/mop1</i> | 5,982,599                | 1,350,921 (23%)                      | 4,113,045 (69%)           | 3,248,869 (79%)       |                          |

<sup>a</sup> The number of reads after trimming low quality bases at the 3' end and removing the reads shorter than 32 bp ; <sup>b</sup> The number of reads (percentage) that aligned to more than 1 genomic locations on B73 reference genome allowing a maximum of 2 mismatches including insertion/deletions; <sup>c</sup> The number of reads (percentage of total reads) that aligned to a unique location of the B73 reference genome; <sup>d</sup> The number of uniquely mapped reads (percentage of uniquely mapped to genome) that can be projected onto gene models; <sup>e</sup> The union of genes (percentage of all 32,540 all genes) captured from two genotypes.
